# Supplementary material for: Microplastics dysregulate innate immunity in the SARS-CoV-2 infected lung
Source: Front Immunol. 2024 May 13;15:1382655. doi: 10.3389/fimmu.2024.1382655 (PMC11128561; doi:10.3389/fimmu.2024.1382655)
Supplement: Supplementary file 2 [file Table_1.xlsx]

## Sheet: a Alignment summary
	Sample name	Group	dpi	Total reads
Paired RNA-Seq reads were aligned to the mouse GRCm39 and the SARS-CoV-2 BA.5 reference genomes. Paired alignments were counted using Samtools	M1	BA.5	6	33838834
	M2	BA.5	6	36465474
	M3	BA.5	6	32493092
	M4	BA.5	6	27067204
	M5	BA.5	6	33818808
	M6	BA.5	6	38599478
	M1	PBS	6	98026304
	M2	PBS	6	82660240
	M3	PBS	6	105965218
	M4	PBS	6	135024460
	M5	PBS	6	95438744

## Sheet: b All BA.5 vs PBS 6dpi
	Ensembl_ID	HUGO_ID	logFC	logCPM	F	PValue	FDR
BA.5 infected (mACE2-hACE2) versus mock infected (PBS) (C57BL/6j) at 6 dpi. Differential expression statistics for all genes from lungs.	ENSMUSG00000000001.5	Gnai3	0.191027	6.64575	14.2383	0.000971813	0.00398482
	ENSMUSG00000000028.16	Cdc45	0.855722	1.62017	48.1385	4.24341e-07	6.87441e-06
	ENSMUSG00000000031.18	H19	0.190318	0.409931	0.267694	0.609771	0.713725
	ENSMUSG00000000056.8	Narf	-0.260816	4.39082	15.8583	0.00057817	0.00258096
	ENSMUSG00000000058.7	Cav2	-0.0809141	7.9459	0.703429	0.410174	0.533003
	ENSMUSG00000000078.8	Klf6	-0.033611	7.57191	0.294734	0.59237	0.698842
	ENSMUSG00000000085.17	Scmh1	0.0609459	5.75557	1.54564	0.226171	0.338442
	ENSMUSG00000000088.8	Cox5a	0.185139	5.6722	5.01609	0.0349609	0.0766898
	ENSMUSG00000000093.7	Tbx2	0.135972	8.53116	3.14654	0.0891867	0.163306
	ENSMUSG00000000094.13	Tbx4	0.12844	7.05667	3.36749	0.0793208	0.148851
	ENSMUSG00000000120.7	Ngfr	0.818622	0.999198	8.0056	0.00944379	0.0260174
	ENSMUSG00000000126.12	Wnt9a	-0.0160136	3.79372	0.0344137	0.854438	0.903479
	ENSMUSG00000000127.16	Fer	-0.288992	3.91514	36.5086	3.50395e-06	3.85337e-05
	ENSMUSG00000000131.16	Xpo6	0.0480932	6.18458	2.45222	0.130868	0.221703
	ENSMUSG00000000134.18	Tfe3	0.0945476	6.0299	8.04901	0.00927789	0.0256617
	ENSMUSG00000000142.16	Axin2	-0.137759	5.44013	4.32948	0.0486575	0.100075
	ENSMUSG00000000148.18	Brat1	-0.0197224	4.87508	0.140303	0.711374	0.796306
	ENSMUSG00000000149.11	Gna12	0.222856	7.07135	18.2594	0.000279414	0.00142269
	ENSMUSG00000000154.17	Slc22a18	0.20643	2.92666	3.00996	0.0959928	0.173278
	ENSMUSG00000000157.17	Itgb2l	-0.472328	0.426261	4.33318	0.0485693	0.0999528
	ENSMUSG00000000159.17	Igsf5	0.0949889	4.39859	2.14161	0.156739	0.255603
	ENSMUSG00000000167.15	Pih1d2	-0.0131378	2.94243	0.0154989	0.901994	0.935601
	ENSMUSG00000000168.11	Dlat	0.0588541	5.37728	0.665375	0.422947	0.545299
	ENSMUSG00000000171.6	Sdhd	0.199614	6.19967	14.3948	0.000923255	0.00381894
	ENSMUSG00000000184.13	Ccnd2	-0.0846537	7.36181	1.87678	0.183786	0.288794
	ENSMUSG00000000194.14	Gpr107	0.0266603	6.29528	0.701785	0.410713	0.533395
	ENSMUSG00000000204.17	Slfn4	-0.0111791	4.79549	0.00137511	0.970736	0.981713
	ENSMUSG00000000216.9	Scnn1g	0.00499816	7.4811	0.0064551	0.936651	0.958921
	ENSMUSG00000000223.14	Drp2	0.505534	0.239485	2.38726	0.13583	0.228269
	ENSMUSG00000000244.18	Tspan32	0.327358	3.32979	12.5051	0.00174365	0.00643001
	ENSMUSG00000000253.14	Gmpr	-0.0985303	3.62253	1.01308	0.324527	0.445645
	ENSMUSG00000000266.12	Mid2	-0.384649	6.02987	15.4158	0.000664667	0.00289489
	ENSMUSG00000000275.17	Trim25	-0.317197	7.22715	37.1255	3.10072e-06	3.48187e-05
	ENSMUSG00000000276.12	Dgke	-0.223445	4.99956	14.8195	0.000804345	0.00339636
	ENSMUSG00000000278.11	Scpep1	0.232556	5.97374	40.6175	1.5889e-06	2.01519e-05
	ENSMUSG00000000282.13	Mnt	0.404165	5.69891	45.8336	6.25985e-07	9.42787e-06
	ENSMUSG00000000290.14	Itgb2	0.314772	6.96545	18.8769	0.000233486	0.00122742
	ENSMUSG00000000295.14	Hddc2	-0.194617	2.55377	3.22773	0.0854054	0.157774
	ENSMUSG00000000296.9	Tpd52l1	-0.232551	0.245286	1.74692	0.217963	0.329124
	ENSMUSG00000000301.17	Pemt	0.325065	0.626898	3.92906	0.0593978	0.117455
	ENSMUSG00000000303.13	Cdh1	-0.0904932	8.54122	6.65552	0.0166669	0.0417223
	ENSMUSG00000000305.13	Cdh4	-0.237392	2.7424	2.85643	0.104374	0.185245
	ENSMUSG00000000308.15	Ckmt1	0.141148	4.0525	1.64012	0.212937	0.323439
	ENSMUSG00000000317.12	Bcl6b	0.1528	5.51123	2.44956	0.131067	0.222019
	ENSMUSG00000000318.17	Clec10a	0.672944	2.88498	15.1471	0.000724027	0.0031153
	ENSMUSG00000000320.11	Alox12	-0.371557	3.10927	2.81141	0.106991	0.188848
	ENSMUSG00000000326.14	Comt	0.166878	6.64655	5.12928	0.0331485	0.0734718
	ENSMUSG00000000339.15	Rtca	0.150938	4.31684	6.98078	0.0144895	0.0371755
	ENSMUSG00000000340.11	Dbt	-0.252858	4.74768	12.9268	0.00150803	0.00570218
	ENSMUSG00000000346.10	Dazap2	-0.0290152	8.51308	1.03281	0.319958	0.440774
	ENSMUSG00000000355.14	Mcts1	0.0525992	3.79525	0.378455	0.544406	0.657427
	ENSMUSG00000000359.4	Rem1	0.657323	3.45938	32.6413	7.77998e-06	7.35078e-05
	ENSMUSG00000000374.9	Trappc10	-0.124015	6.16674	10.8193	0.00318059	0.0105973
	ENSMUSG00000000378.16	Ccm2	0.387223	5.22718	66.5071	2.84006e-08	8.51307e-07
	ENSMUSG00000000384.16	Tbrg4	0.248755	4.45204	24.355	5.32446e-05	0.000355896
	ENSMUSG00000000385.9	Tmprss2	-0.113298	6.81385	4.63642	0.0419023	0.0888214
	ENSMUSG00000000386.19	Mx1	0.373908	5.76922	2.40852	0.134183	0.226088
	ENSMUSG00000000392.18	Fap	-0.0407416	0.971646	0.0537464	0.818696	0.877412
	ENSMUSG00000000399.11	Ndufa9	0.0142981	5.7186	0.0590065	0.810203	0.87104
	ENSMUSG00000000402.3	Egfl6	0.277379	6.38539	10.6279	0.00341278	0.0112527
	ENSMUSG00000000409.15	Lck	1.46976	4.36102	116.031	1.62883e-10	1.8326e-08
	ENSMUSG00000000416.17	Cttnbp2	-0.387475	3.45257	4.3454	0.0482785	0.0995305
	ENSMUSG00000000420.16	Galnt1	-0.017326	6.79886	0.196462	0.661689	0.757364
	ENSMUSG00000000439.10	Mkrn2	-0.0808811	5.68807	4.285	0.0497349	0.10191
	ENSMUSG00000000440.13	Pparg	0.106485	3.80665	0.507912	0.483136	0.602288
	ENSMUSG00000000441.18	Raf1	0.187456	6.80645	24.4018	5.26178e-05	0.000351976
	ENSMUSG00000000486.14	Septin1	0.815083	4.5277	40.5749	1.60157e-06	2.02831e-05
	ENSMUSG00000000489.8	Pdgfb	0.254887	7.54409	9.46566	0.00529139	0.0161134
	ENSMUSG00000000530.17	Acvrl1	0.138822	9.70007	4.92308	0.0365334	0.0794266
	ENSMUSG00000000531.6	Tamalin	0.221138	5.16648	9.80718	0.00464254	0.0145066
	ENSMUSG00000000532.12	Acvr1b	-0.0460718	6.55088	1.03599	0.31923	0.440031
	ENSMUSG00000000538.19	Tom1l2	-0.129755	6.98034	9.83312	0.00459696	0.0144029
	ENSMUSG00000000552.11	Zfp385a	0.378778	4.06559	24.167	5.58424e-05	0.000370985
	ENSMUSG00000000555.9	Itga5	0.502117	6.31181	135.513	3.51611e-11	6.32139e-09
	ENSMUSG00000000561.15	Wdr77	0.200599	5.45756	15.1993	0.000712048	0.00307014
	ENSMUSG00000000562.6	Adora3	-0.108947	0.421555	0.379867	0.543662	0.656801
	ENSMUSG00000000563.18	Atp5pb	0.159332	6.92727	16.6828	0.000447975	0.00209717
	ENSMUSG00000000567.6	Sox9	0.449202	-0.56382	1.72529	0.201828	0.310241
	ENSMUSG00000000568.16	Hnrnpd	0.0589245	6.59728	1.91957	0.179052	0.282833
	ENSMUSG00000000579.15	Dynlt1c	-0.0804703	3.84203	0.760637	0.392046	0.51572
	ENSMUSG00000000581.9	C1d	-0.0454809	4.21426	0.540965	0.469388	0.589193
	ENSMUSG00000000594.8	Gm2a	0.0266383	7.0595	0.249441	0.622162	0.72405
	ENSMUSG00000000600.16	Krit1	-0.0424725	5.26923	0.418335	0.524103	0.639731
	ENSMUSG00000000605.10	Clcn4	-0.0165399	6.6072	0.126337	0.725465	0.806455
	ENSMUSG00000000627.16	Sema4f	0.360827	4.76845	18.8486	0.000235401	0.00123537
	ENSMUSG00000000628.11	Hk2	0.248677	4.79681	5.75255	0.0248712	0.0581251
	ENSMUSG00000000631.21	Myo18a	-0.459514	7.16312	83.1946	3.81896e-09	1.77124e-07
	ENSMUSG00000000673.10	Haao	-0.216037	2.92601	2.94452	0.099466	0.178272
	ENSMUSG00000000682.8	Cd52	0.480757	5.87475	20.6119	0.000143104	0.000812896
	ENSMUSG00000000686.12	Abhd15	0.269639	1.74441	3.50783	0.0737064	0.140217
	ENSMUSG00000000690.6	Hoxb6	-0.167125	1.96962	1.1738	0.28973	0.408621
	ENSMUSG00000000693.11	Loxl3	0.185684	4.38663	7.81822	0.0101982	0.0277193
	ENSMUSG00000000708.15	Kat2b	-0.228349	6.20698	19.6224	0.000188696	0.00102481
	ENSMUSG00000000711.4	Rab5b	-0.0163075	7.69202	0.284613	0.598757	0.704332
	ENSMUSG00000000732.10	Icosl	0.080782	5.42246	1.12612	0.299503	0.419588
	ENSMUSG00000000738.19	Spg7	0.246323	5.60446	31.4132	1.01445e-05	9.13793e-05
	ENSMUSG00000000739.15	Sult5a1	0.175931	3.52937	1.533	0.228019	0.340559
	ENSMUSG00000000740.13	Rpl13	-0.0055701	8.35513	0.0120499	0.913532	0.94345
	ENSMUSG00000000743.10	Chmp1a	0.145427	6.52482	21.1207	0.000124457	0.00072323
	ENSMUSG00000000751.14	Rpa1	0.0635318	6.00147	1.60243	0.218096	0.329239
	ENSMUSG00000000753.16	Serpinf1	0.480557	4.96877	18.6525	0.000249149	0.00129312
	ENSMUSG00000000759.15	Tubgcp3	-0.101176	5.89153	8.02932	0.00935272	0.0258303
	ENSMUSG00000000776.14	Polr3d	0.219607	4.00796	8.47509	0.00780985	0.0222252
	ENSMUSG00000000782.17	Tcf7	0.541107	5.47525	48.0244	4.32457e-07	6.96364e-06
	ENSMUSG00000000787.13	Ddx3x	-0.168099	8.4136	1.9265	0.178299	0.281872
	ENSMUSG00000000791.10	Il12rb1	1.40312	1.18581	75.9541	8.74303e-09	3.38822e-07
	ENSMUSG00000000792.3	Slc5a5	0.658268	-0.203082	9.81921	0.00462133	0.0144636
	ENSMUSG00000000794.10	Kcnn3	-0.0254304	3.41339	0.0608041	0.807393	0.869062
	ENSMUSG00000000804.15	Usp32	-0.307997	5.38318	35.9271	3.93666e-06	4.21951e-05
	ENSMUSG00000000805.19	Car4	-0.0987489	7.53661	3.15257	0.0888995	0.162917
	ENSMUSG00000000811.15	Txnrd3	-0.0109542	4.37813	0.0257641	0.873864	0.916706
	ENSMUSG00000000817.11	Fasl	0.45953	-0.160566	3.7084	0.0664536	0.128591
	ENSMUSG00000000823.17	Zfp512b	-0.423824	6.06817	78.2559	6.67566e-09	2.75869e-07
	ENSMUSG00000000826.17	Dnajc5	-0.164151	7.32643	24.1275	5.64059e-05	0.000374158
	ENSMUSG00000000827.19	Tpd52l2	0.108544	6.20461	9.20266	0.00585903	0.017562
	ENSMUSG00000000838.18	Fmr1	-0.195243	5.05505	3.1594	0.0885749	0.162407
	ENSMUSG00000000861.16	Bcl11a	-0.505452	2.59848	12.2383	0.00191338	0.00694042
	ENSMUSG00000000876.12	Pxmp4	-0.127811	5.34669	6.52172	0.0176659	0.0437173
	ENSMUSG00000000881.13	Dlg3	-0.0581654	5.35843	1.33697	0.259312	0.375375
	ENSMUSG00000000884.18	Gnb1l	0.265037	2.00754	4.69313	0.0407735	0.0868504
	ENSMUSG00000000901.18	Mmp11	-0.258891	5.74019	19.7356	0.000182759	0.00100193
	ENSMUSG00000000902.14	Smarcb1	0.191316	6.17427	19.1354	0.000216768	0.0011504
	ENSMUSG00000000903.4	Vpreb3	0.199937	3.93989	2.13606	0.157255	0.256129
	ENSMUSG00000000915.16	Hip1r	0.0304539	6.75846	0.578944	0.454374	0.574941
	ENSMUSG00000000916.16	Nsun5	0.291976	4.23251	33.2359	6.85678e-06	6.65157e-05
	ENSMUSG00000000934.10	Top1mt	-0.0482439	2.27551	0.34369	0.564594	0.675166
	ENSMUSG00000000942.11	Hoxa4	-0.232909	3.04564	6.11916	0.0210951	0.0507394
	ENSMUSG00000000957.12	Mmp14	0.150985	6.4668	3.08153	0.0923541	0.167975
	ENSMUSG00000000958.11	Slc7a7	0.132978	4.43277	3.27203	0.0834204	0.154927
	ENSMUSG00000000959.8	Oxa1l	0.0594925	5.57494	1.95497	0.175248	0.27816
	ENSMUSG00000000976.14	Heatr6	-0.0619074	4.88715	1.76717	0.19663	0.304544
	ENSMUSG00000000982.6	Ccl3	1.4126	1.10704	14.1352	0.00100533	0.00408575
	ENSMUSG00000001014.7	Icam4	-0.616296	0.0103785	8.31616	0.00832518	0.0234317
	ENSMUSG00000001016.13	Ilf2	-0.011122	5.70144	0.0743741	0.787479	0.854192
	ENSMUSG00000001017.16	Chtop	0.153842	6.99726	9.54402	0.00513417	0.0157353
	ENSMUSG00000001018.16	Snapin	-0.103316	6.1641	4.57217	0.043224	0.0910146
	ENSMUSG00000001020.9	S100a4	0.624966	4.74398	21.6609	0.000107517	0.000639542
	ENSMUSG00000001025.9	S100a6	0.0985865	7.57068	1.01631	0.323772	0.445008
	ENSMUSG00000001027.8	Scn4a	-0.542501	1.80602	13.139	0.00140282	0.00537775
	ENSMUSG00000001029.16	Icam2	0.0776923	7.52303	2.10085	0.160572	0.260026
	ENSMUSG00000001034.18	Mapk7	0.378026	5.40591	40.0335	1.77215e-06	2.19337e-05
	ENSMUSG00000001036.18	Epn2	-0.263342	7.42526	46.3765	5.7053e-07	8.72761e-06
	ENSMUSG00000001039.13	B9d1	0.123874	3.14731	1.89039	0.182263	0.286815
	ENSMUSG00000001052.16	Sec24b	-0.0361869	6.40629	1.1204	0.300705	0.420866
	ENSMUSG00000001053.16	N4bp3	0.571974	5.41322	33.3039	6.75909e-06	6.57767e-05
	ENSMUSG00000001054.10	Rmnd5b	0.243325	4.92944	18.7525	0.000242036	0.00126298
	ENSMUSG00000001056.4	Nhp2	0.178029	3.83314	6.58708	0.0171698	0.0427506
	ENSMUSG00000001062.19	Vps9d1	0.180485	4.8786	10.9107	0.0030758	0.0103092
	ENSMUSG00000001065.16	Zfp276	0.135272	5.20402	5.83731	0.0239356	0.0563942
	ENSMUSG00000001082.13	Mfsd10	0.319819	5.01976	40.2095	1.71463e-06	2.14655e-05
	ENSMUSG00000001089.15	Luzp1	-0.209031	6.479	13.4242	0.00127384	0.00497302
	ENSMUSG00000001095.6	Slc13a2	0.344903	0.14912	1.85218	0.186576	0.292258
	ENSMUSG00000001098.16	Kctd10	0.17375	8.77673	15.6653	0.0006143	0.00271141
	ENSMUSG00000001100.11	Poldip2	0.143596	5.73053	8.31712	0.00832194	0.0234263
	ENSMUSG00000001105.16	Ift20	-0.0794025	5.44077	3.08379	0.0922417	0.167843
	ENSMUSG00000001119.8	Col6a1	0.45458	8.57781	24.2518	5.46535e-05	0.000364615
	ENSMUSG00000001120.16	Pcbp3	0.245357	4.6216	14.2303	0.00097437	0.00399155
	ENSMUSG00000001123.16	Lgals9	0.235303	7.57258	9.00347	0.00633349	0.0186823
	ENSMUSG00000001127.13	Araf	-0.0220805	6.63924	0.464653	0.502191	0.618964
	ENSMUSG00000001128.8	Cfp	0.509878	4.46346	13.709	0.0011579	0.0045958
	ENSMUSG00000001131.12	Timp1	0.821006	3.39861	13.0868	0.00142794	0.00545489
	ENSMUSG00000001134.10	Uxt	0.120707	2.84986	1.45413	0.239994	0.354653
	ENSMUSG00000001138.14	Cnnm3	-0.0702243	5.51997	3.53692	0.0726005	0.138445
	ENSMUSG00000001143.14	Lman2l	-0.0900849	4.98038	2.5879	0.121178	0.208404
	ENSMUSG00000001150.8	Mcm3ap	-0.450465	5.59562	111.172	2.46942e-10	2.43075e-08
	ENSMUSG00000001151.11	Pcnt	-0.405291	6.55561	93.0912	1.34421e-09	8.43228e-08
	ENSMUSG00000001156.10	Mxd1	0.00858527	5.54634	0.00754435	0.931528	0.955548
	ENSMUSG00000001157.14	Gmcl1	0.145528	4.21858	4.08118	0.0550293	0.110598
	ENSMUSG00000001158.14	Snrnp27	-0.478096	4.55385	55.415	1.3464e-07	2.79856e-06
	ENSMUSG00000001166.18	Oas1c	-0.0610025	3.03635	0.553305	0.464422	0.584684
	ENSMUSG00000001173.16	Ocrl	-0.145942	5.34299	10.6055	0.00344115	0.0113206
	ENSMUSG00000001175.17	Calm1	-0.0239409	9.37083	0.274762	0.605117	0.70942
	ENSMUSG00000001211.16	Agpat3	0.0309899	7.26835	0.698699	0.411729	0.534237
	ENSMUSG00000001227.13	Sema6b	0.583292	3.84642	29.3915	1.59216e-05	0.000132029
	ENSMUSG00000001228.15	Uhrf1	1.5239	3.23329	65.8993	3.0768e-08	9.04404e-07
	ENSMUSG00000001229.10	Dpp9	0.304617	6.40302	37.9597	2.63357e-06	3.02349e-05
	ENSMUSG00000001240.14	Ramp2	0.16012	8.50166	8.64343	0.00730201	0.0210143
	ENSMUSG00000001247.17	Lsr	0.35313	5.60951	55.7498	1.28053e-07	2.70027e-06
	ENSMUSG00000001248.16	Gramd1a	0.286597	6.36048	58.5441	8.49453e-08	1.97515e-06
	ENSMUSG00000001249.15	Hpn	0.300402	3.69657	10.3651	0.00376242	0.0122034
	ENSMUSG00000001270.10	Ckb	0.434357	6.2663	25.2228	4.28421e-05	0.000296477
	ENSMUSG00000001280.14	Sp1	-0.208773	6.77555	12.3051	0.00186928	0.00680978
	ENSMUSG00000001281.11	Itgb7	0.826417	5.5152	45.6472	6.46355e-07	9.66706e-06
	ENSMUSG00000001285.13	Myg1	0.00624161	4.73003	0.0135433	0.908354	0.940101
	ENSMUSG00000001288.16	Rarg	0.12891	6.69348	3.9565	0.0585815	0.116263
	ENSMUSG00000001289.13	Pfdn5	-0.142446	6.73542	5.77372	0.0246338	0.057694
	ENSMUSG00000001300.17	Efnb2	0.0279435	7.82431	0.193302	0.664242	0.759289
	ENSMUSG00000001305.6	Rrp15	0.0689228	3.40519	0.947828	0.340293	0.46245
	ENSMUSG00000001313.13	Rnd2	0.0275475	3.46993	0.117072	0.735306	0.814521
	ENSMUSG00000001323.18	Srr	-0.188902	5.14934	11.0993	0.00287145	0.00971013
	ENSMUSG00000001333.10	Sync	0.210419	1.43109	1.77787	0.195328	0.303135
	ENSMUSG00000001334.10	Fndc5	-0.0921871	3.68266	0.14146	0.710243	0.795498
	ENSMUSG00000001348.16	Acp5	0.383495	4.61308	7.33987	0.012444	0.0327515
	ENSMUSG00000001349.6	Cnn1	1.39895	5.55026	62.0944	5.14537e-08	1.3473e-06
	ENSMUSG00000001366.15	Fbxo9	0.224512	5.52071	31.244	1.05275e-05	9.40051e-05
	ENSMUSG00000001376.18	Vps50	-0.04668	4.43887	0.656128	0.426143	0.548491
	ENSMUSG00000001380.8	Hars	0.100651	5.27461	4.22763	0.0511644	0.104223
	ENSMUSG00000001383.10	Zmat2	-0.044914	5.88727	1.15792	0.292936	0.412175
	ENSMUSG00000001403.14	Ube2c	1.70541	1.88964	43.076	1.01473e-06	1.39424e-05
	ENSMUSG00000001415.11	Smg5	0.0852273	6.26226	6.13844	0.020915	0.0503641
	ENSMUSG00000001416.14	Cct3	0.273943	6.68234	32.9052	7.35451e-06	7.02769e-05
	ENSMUSG00000001418.14	Glmp	0.151624	6.8146	15.0117	0.000756095	0.00323254
	ENSMUSG00000001419.18	Mef2d	0.204239	7.36358	37.0001	3.17838e-06	3.55763e-05
	ENSMUSG00000001420.14	Tmem79	0.159053	2.65871	1.32405	0.261564	0.37785
	ENSMUSG00000001424.15	Snd1	0.0592932	6.83354	2.28376	0.144207	0.239052
	ENSMUSG00000001435.16	Col18a1	0.564787	6.34854	112.227	2.25333e-10	2.2946e-08
	ENSMUSG00000001436.16	Slc19a1	-0.0343939	2.99551	0.130342	0.721337	0.803641
	ENSMUSG00000001440.6	Kpnb1	0.0241427	7.47987	0.600435	0.446221	0.567872
	ENSMUSG00000001441.14	Npepps	-0.146591	6.3587	10.9906	0.00298734	0.0100533
	ENSMUSG00000001444.3	Tbx21	1.5797	2.28522	89.5251	1.93735e-09	1.0558e-07
	ENSMUSG00000001445.11	Mrpl10	0.121119	5.44236	5.36113	0.0297551	0.0673021
	ENSMUSG00000001467.6	Cyp51	0.326141	5.22763	17.1135	0.000392981	0.00189002
	ENSMUSG00000001472.18	Tcf25	-0.0674482	8.40566	5.37085	0.0296217	0.0670699
	ENSMUSG00000001473.8	Tubb6	0.845518	4.87944	79.962	5.48753e-09	2.35707e-07
	ENSMUSG00000001482.16	Def8	0.0276291	5.13372	0.372684	0.547466	0.659679
	ENSMUSG00000001493.10	Meox1	0.126033	4.60457	1.39376	0.249708	0.365017
	ENSMUSG00000001494.7	Sost	0.948068	-0.0225362	7.01954	0.0142517	0.0366789
	ENSMUSG00000001496.16	Nkx2-1	0.238625	7.51133	19.7786	0.000180553	0.000993272
	ENSMUSG00000001497.19	Pax9	0.428541	0.0571925	0.853877	0.364949	0.487764
	ENSMUSG00000001504.11	Irx2	0.340768	5.76111	27.8804	2.25702e-05	0.000176522
	ENSMUSG00000001506.11	Col1a1	1.15459	8.37452	49.888	3.18605e-07	5.53402e-06
	ENSMUSG00000001507.17	Itga3	0.131193	8.35967	6.85065	0.0153204	0.0389464
	ENSMUSG00000001508.16	Sgca	0.242668	0.961178	0.770857	0.388934	0.51277
	ENSMUSG00000001517.15	Foxm1	1.04208	3.14525	32.3259	8.32371e-06	7.77905e-05
	ENSMUSG00000001518.13	Itfg2	0.143074	4.52452	10.717	0.00330244	0.0109406
	ENSMUSG00000001520.13	Nrip2	-0.182424	-0.336599	0.550054	0.465721	0.585856
	ENSMUSG00000001521.13	Tulp3	0.0687177	5.28985	1.57513	0.221931	0.333499
	ENSMUSG00000001524.15	Gtf2h4	0.105544	3.38059	2.48323	0.128575	0.218558
	ENSMUSG00000001525.11	Tubb5	0.463719	8.26879	31.711	9.50689e-06	8.66652e-05
	ENSMUSG00000001542.8	Ell2	0.054681	4.92258	0.981257	0.332086	0.453504
	ENSMUSG00000001552.15	Jup	0.317704	9.06767	15.6991	0.000607789	0.00268948
	ENSMUSG00000001555.11	Fkbp10	0.420863	5.05832	23.9194	5.94769e-05	0.000390961
	ENSMUSG00000001569.11	Nom1	0.0693843	5.146	3.41204	0.0774869	0.146023
	ENSMUSG00000001576.16	Ergic1	0.278591	6.43275	36.382	3.59359e-06	3.92661e-05
	ENSMUSG00000001583.14	Tnk1	0.0559839	3.87239	0.682054	0.417274	0.539865
	ENSMUSG00000001588.13	Acap1	0.384072	4.63308	10.6359	0.00340279	0.0112286
	ENSMUSG00000001604.15	Tcea3	-0.206899	4.79748	7.71331	0.0106495	0.0287487
	ENSMUSG00000001627.13	Ifrd1	0.386858	5.68325	31.7258	9.47629e-06	8.64575e-05
	ENSMUSG00000001630.14	Stk38l	0.0188341	4.87411	0.116052	0.736415	0.815439
	ENSMUSG00000001632.17	Brpf1	-0.131757	5.79426	16.0199	0.000549724	0.00247525
	ENSMUSG00000001642.19	Akr1b3	0.059677	6.74092	2.10126	0.160533	0.259986
	ENSMUSG00000001663.11	Gstt1	0.0566672	6.36011	0.984432	0.331321	0.452651
	ENSMUSG00000001665.12	Gstt3	-0.0886707	5.73589	4.34158	0.0483691	0.0996231
	ENSMUSG00000001666.9	Ddt	-0.0574701	4.61329	0.592857	0.449069	0.570241
	ENSMUSG00000001670.14	Tat	1.62269	-0.160769	26.5274	3.11365e-05	0.000227769
	ENSMUSG00000001672.15	Marveld3	0.0876398	3.56802	1.44026	0.242183	0.357011
	ENSMUSG00000001674.12	Ddx18	0.0717364	5.11943	2.07218	0.163335	0.263667
	ENSMUSG00000001687.16	Ubl3	0.102958	7.46306	7.01239	0.0142952	0.0367599
	ENSMUSG00000001700.11	Gramd3	0.456564	4.47135	29.1781	1.67152e-05	0.000137433
	ENSMUSG00000001707.9	Eef1e1	0.302087	2.91035	11.417	0.00256002	0.00880209
	ENSMUSG00000001729.15	Akt1	0.268929	7.73053	47.9898	4.34949e-07	6.99037e-06
	ENSMUSG00000001739.15	Cldn15	0.0448401	4.04693	0.125239	0.726609	0.807503
	ENSMUSG00000001741.13	Il16	0.0266912	5.63093	0.131453	0.720206	0.802637
	ENSMUSG00000001750.17	Tcirg1	0.24182	6.76252	12.6678	0.00164832	0.00613293
	ENSMUSG00000001751.10	Naglu	0.26938	4.99965	32.6566	7.75462e-06	7.33367e-05
	ENSMUSG00000001755.13	Coasy	0.176897	4.78928	7.89409	0.00988504	0.0270323
	ENSMUSG00000001761.8	Smo	0.189853	5.75458	8.44657	0.00789969	0.022426
	ENSMUSG00000001763.15	Tspan33	0.077812	1.8672	0.284358	0.598919	0.704459
	ENSMUSG00000001767.6	Crnkl1	-0.077621	4.71732	2.81787	0.106611	0.188292
	ENSMUSG00000001768.17	Rin2	-0.292354	7.60073	49.7385	3.26414e-07	5.64716e-06
	ENSMUSG00000001774.9	Chordc1	0.272979	5.17527	22.2608	9.15892e-05	0.000557106
	ENSMUSG00000001783.4	Rtcb	0.0630637	6.81662	1.60829	0.217285	0.32827
	ENSMUSG00000001785.14	Pwp1	0.109399	4.53081	3.18111	0.0875534	0.160839
	ENSMUSG00000001786.15	Fbxo7	0.102713	4.71595	2.23811	0.148096	0.244199
	ENSMUSG00000001794.14	Capns1	0.245095	8.04641	29.7878	1.45548e-05	0.000123095
	ENSMUSG00000001802.17	Lrp3	0.272763	4.27462	18.4037	0.000267858	0.00137428
	ENSMUSG00000001829.18	Clpb	0.0882852	4.77919	3.17166	0.0879966	0.161466
	ENSMUSG00000001833.18	Septin7	-0.0225812	7.1864	0.104776	0.749066	0.825203
	ENSMUSG00000001844.11	Zdhhc4	0.0972717	5.08248	4.54009	0.0439013	0.0921515
	ENSMUSG00000001847.15	Rac1	0.0839211	8.69227	4.40466	0.046896	0.0971975
	ENSMUSG00000001855.16	Nup214	-0.323318	5.87293	70.9128	1.61518e-08	5.45637e-07
	ENSMUSG00000001864.14	Aif1l	0.401014	2.6123	13.4335	0.00126986	0.00495971
	ENSMUSG00000001865.3	Cpa3	0.70184	-0.0039809	2.13553	0.157304	0.256161
	ENSMUSG00000001870.17	Ltbp1	0.058599	6.77811	1.12556	0.299621	0.419672
	ENSMUSG00000001891.17	Ugp2	0.0375456	6.14594	0.546677	0.467078	0.586928
	ENSMUSG00000001909.17	Trmt1	0.0741968	5.26602	2.35558	0.138331	0.231424
	ENSMUSG00000001910.6	Nacc1	0.372855	6.81909	84.1314	3.4453e-09	1.63268e-07
	ENSMUSG00000001911.17	Nfix	0.386021	7.71508	55.7758	1.27557e-07	2.69305e-06
	ENSMUSG00000001918.18	Slc1a5	0.218533	7.70328	8.2182	0.00866139	0.0241983
	ENSMUSG00000001924.16	Uba1	0.162977	7.98629	19.4819	0.000196364	0.00105829
	ENSMUSG00000001930.18	Vwf	-0.5764	9.16826	42.9537	1.03719e-06	1.41864e-05
	ENSMUSG00000001942.9	Siae	-0.15238	4.83665	8.37276	0.00813749	0.0229925
	ENSMUSG00000001943.9	Vsig2	0.168122	4.62773	8.34666	0.00822345	0.0231865
	ENSMUSG00000001946.15	Esam	0.197381	8.0695	16.2986	0.000504163	0.00231249
	ENSMUSG00000001948.11	Spa17	-0.269284	3.05078	4.08272	0.0549868	0.110525
	ENSMUSG00000001962.9	Fam50a	0.148692	4.96458	5.04386	0.0345061	0.0759117
	ENSMUSG00000001964.15	Emd	0.177211	5.58031	12.0471	0.0020461	0.007345
	ENSMUSG00000001983.8	Taco1	-0.0376531	3.03515	0.349445	0.654262	0.75113
	ENSMUSG00000001986.17	Gria3	-0.00784433	4.16041	0.0108033	0.918109	0.946215
	ENSMUSG00000001995.10	Sipa1l2	-0.537945	6.55366	43.4203	9.54261e-07	1.32542e-05
	ENSMUSG00000001998.16	Ap4e1	-0.720957	3.5555	40.1399	1.73713e-06	2.1623e-05
	ENSMUSG00000001999.16	Blvra	-0.139531	4.14768	4.55121	0.0436653	0.0917444
	ENSMUSG00000002006.13	Pdzd4	0.185146	2.99234	4.90572	0.0368357	0.0799276
	ENSMUSG00000002007.6	Srpk3	-0.175472	2.69889	1.72509	0.201853	0.310241
	ENSMUSG00000002010.18	Idh3g	0.107112	6.35032	2.406	0.134376	0.226327
	ENSMUSG00000002012.14	Pnck	0.0238018	1.69435	0.014394	0.905534	0.938134
	ENSMUSG00000002014.13	Ssr4	0.133686	5.74508	8.89025	0.0066219	0.0193822
	ENSMUSG00000002015.6	Bcap31	0.0290504	6.70025	0.441552	0.512911	0.628917
	ENSMUSG00000002017.11	Fam98a	0.243029	5.1676	28.2688	2.06127e-05	0.000164139
	ENSMUSG00000002020.16	Ltbp2	0.251486	7.26913	4.60148	0.0426153	0.0900701
	ENSMUSG00000002028.14	Kmt2a	-0.548508	6.65544	199.143	6.83777e-13	4.11186e-10
	ENSMUSG00000002031.14	Ift46	-0.0982418	5.18353	3.03773	0.0945615	0.17126
	ENSMUSG00000002032.18	Tmem25	0.261808	1.54351	4.07297	0.0552555	0.110963
	ENSMUSG00000002033.15	Cd3g	1.05455	3.10151	45.3035	6.85824e-07	1.01529e-05
	ENSMUSG00000002043.18	Trappc6a	0.168723	4.08068	5.44356	0.0286437	0.0652793
	ENSMUSG00000002052.7	Supt6	-0.2214	6.99282	41.1645	1.43584e-06	1.84522e-05
	ENSMUSG00000002055.10	Spag5	1.45041	2.07666	37.2077	3.0509e-06	3.43255e-05
	ENSMUSG00000002058.14	Unc119	0.0794816	4.71329	1.41546	0.246159	0.361308
	ENSMUSG00000002059.19	Rab34	0.0746117	4.88423	1.73185	0.201003	0.309245
	ENSMUSG00000002064.11	Sdf2	0.240124	5.45129	23.2134	7.13331e-05	0.00045534
	ENSMUSG00000002068.17	Ccne1	1.66272	1.00817	68.0649	2.31893e-08	7.36609e-07
	ENSMUSG00000002083.14	Bbc3	0.598309	4.02585	32.8585	7.42788e-06	7.08615e-05
	ENSMUSG00000002100.16	Mybpc3	-0.37134	4.04019	1.05204	0.315591	0.436308
	ENSMUSG00000002102.16	Psmc3	0.0636073	6.68687	2.37332	0.136925	0.229643
	ENSMUSG00000002103.17	Acp2	-0.230407	6.18249	27.1106	2.70744e-05	0.000204483
	ENSMUSG00000002104.12	Rapsn	0.195391	0.722486	1.24782	0.275379	0.393138
	ENSMUSG00000002105.16	Slc39a13	0.0843239	5.84489	3.22949	0.0853256	0.157677
	ENSMUSG00000002107.19	Celf2	-0.240388	6.27232	20.2203	0.000159528	0.000893745
	ENSMUSG00000002108.11	Nr1h3	0.0686366	5.61125	1.17053	0.290387	0.409249
	ENSMUSG00000002109.15	Ddb2	0.106345	4.21704	2.73095	0.111862	0.195506
	ENSMUSG00000002111.9	Spi1	0.192668	5.23343	8.35765	0.00818713	0.0230991
	ENSMUSG00000002129.12	Sf3a1	0.309266	6.06752	70.9793	1.6018e-08	5.4452e-07
	ENSMUSG00000002147.19	Stat6	0.140874	7.53469	14.379	0.000928029	0.00383511
	ENSMUSG00000002204.10	Napsa	0.175967	8.39423	10.047	0.0042393	0.0134515
	ENSMUSG00000002205.17	Vrk3	0.14623	5.27849	5.18116	0.0323532	0.0720019
	ENSMUSG00000002210.12	Smg9	0.252207	4.59627	27.8465	2.275e-05	0.000177352
	ENSMUSG00000002221.12	Paxip1	0.0980633	5.17642	3.58375	0.0708597	0.135719
	ENSMUSG00000002222.15	Rmnd5a	-0.171073	6.60882	6.96782	0.0145699	0.0373434
	ENSMUSG00000002227.16	Mov10	0.191282	5.25342	6.07901	0.0214759	0.0514943
	ENSMUSG00000002228.8	Ppm1j	0.498292	2.06654	15.0564	0.000745355	0.003196
	ENSMUSG00000002233.14	Rhoc	0.130986	6.59634	5.38138	0.0294777	0.0667904
	ENSMUSG00000002249.22	Tead3	0.335728	5.35035	33.7764	6.12035e-06	6.08164e-05
	ENSMUSG00000002250.17	Ppard	0.352418	5.50582	57.4444	9.96631e-08	2.25133e-06
	ENSMUSG00000002257.9	Def6	0.644697	3.98057	60.213	6.69289e-08	1.64855e-06
	ENSMUSG00000002265.18	Peg3	-0.326867	4.31224	2.93499	0.0999835	0.179067
	ENSMUSG00000002274.14	Metrn	0.239381	3.40341	7.596	0.0111804	0.0299363
	ENSMUSG00000002279.20	Lmf1	0.101891	4.10971	3.61	0.0699047	0.134229
	ENSMUSG00000002280.12	Ciao3	0.0793422	4.60718	2.06617	0.163921	0.264272
	ENSMUSG00000002289.17	Angptl4	0.420142	5.95756	3.28823	0.082708	0.153899
	ENSMUSG00000002297.17	Dbf4	0.899279	2.78335	55.9136	1.24958e-07	2.65426e-06
	ENSMUSG00000002307.17	Daxx	0.248301	5.89754	6.93916	0.0147497	0.0377154
	ENSMUSG00000002308.17	Cd320	0.444371	3.01958	21.0927	0.000125415	0.000728307
	ENSMUSG00000002319.17	Ipo4	0.248252	5.25653	28.3193	2.03719e-05	0.000162742
	ENSMUSG00000002320.16	Tm9sf1	0.191432	6.52765	20.22	0.000159541	0.000893745
	ENSMUSG00000002324.9	Rec8	0.101684	3.38018	0.707701	0.408777	0.53195
	ENSMUSG00000002325.16	Irf9	0.138006	6.79257	3.95513	0.0586219	0.116303
	ENSMUSG00000002326.7	Gmpr2	0.0216905	4.16834	0.146254	0.705614	0.791688
	ENSMUSG00000002329.8	Mdp1	-0.012968	5.16294	0.0590826	0.810083	0.87099
	ENSMUSG00000002332.17	Dhrs1	-0.00431498	5.58169	0.0067743	0.935108	0.957791
	ENSMUSG00000002342.18	Tmem161a	0.247547	5.23575	29.7687	1.46177e-05	0.000123316
	ENSMUSG00000002343.12	Armc6	0.37743	3.04375	14.7091	0.000833554	0.00349768
	ENSMUSG00000002345.19	Borcs8	0.130874	4.02397	3.39614	0.0781359	0.147071
	ENSMUSG00000002346.17	Slc25a42	-0.0303354	5.00725	0.111819	0.74108	0.818888
	ENSMUSG00000002365.11	Snx9	0.00630713	6.09137	0.022704	0.881529	0.921231
	ENSMUSG00000002372.10	Ranbp3	0.248672	6.14219	49.3135	3.49771e-07	5.91625e-06
	ENSMUSG00000002379.8	Ndufa11	0.209483	4.90232	14.7512	0.000822272	0.00345866
	ENSMUSG00000002393.15	Nr2f6	0.42394	5.43778	30.2877	1.30095e-05	0.000112091
	ENSMUSG00000002395.15	Use1	0.0143193	6.01223	0.0622296	0.805197	0.867397
	ENSMUSG00000002396.9	Ocel1	-0.138631	5.13584	5.12775	0.0331724	0.0735154
	ENSMUSG00000002409.19	Dyrk1b	0.134433	4.68376	4.15454	0.0530535	0.107456
	ENSMUSG00000002413.16	Braf	-0.237325	5.95014	26.4772	3.15163e-05	0.000230245
	ENSMUSG00000002416.14	Ndufb2	-0.0833482	4.74695	1.57924	0.221349	0.332958
	ENSMUSG00000002428.13	Hltf	-0.190204	5.07483	7.29257	0.0126942	0.0332694
	ENSMUSG00000002455.15	Prpf6	0.0122491	6.09942	0.0685842	0.795715	0.86029
	ENSMUSG00000002458.14	Rgs19	0.388639	4.68642	48.7186	3.85569e-07	6.3855e-06
	ENSMUSG00000002475.17	Abhd3	-0.180002	2.71836	2.79593	0.107909	0.19016
	ENSMUSG00000002477.6	Snrpd1	0.0601062	4.24812	0.858238	0.363749	0.486496
	ENSMUSG00000002486.16	Tchp	0.0747804	4.28812	1.35165	0.256785	0.372551
	ENSMUSG00000002489.17	Tiam1	-0.46324	4.91928	50.49	2.89153e-07	5.10482e-06
	ENSMUSG00000002496.11	Tsc2	-0.274727	7.12285	56.5118	1.14328e-07	2.49221e-06
	ENSMUSG00000002504.16	Slc9a3r2	0.307428	8.75568	23.2315	7.09972e-05	0.000453856
	ENSMUSG00000002524.18	Puf60	0.247065	6.96105	47.3655	4.82738e-07	7.61163e-06
	ENSMUSG00000002546.18	Golga2	-0.105956	6.90127	11.3198	0.00265118	0.00907437
	ENSMUSG00000002550.17	Uck1	0.184639	5.56204	6.20375	0.0203173	0.0492581
	ENSMUSG00000002565.17	Scin	0.261723	0.10721	0.963429	0.336428	0.458134
	ENSMUSG00000002578.19	Ikzf4	-0.420803	3.0268	8.04928	0.00927687	0.0256617
	ENSMUSG00000002580.8	Mien1	0.0844857	4.70957	2.24309	0.147666	0.243643
	ENSMUSG00000002588.14	Pon1	-0.632159	5.70856	8.72026	0.0070824	0.0204996
	ENSMUSG00000002602.17	Axl	0.170295	7.54789	11.7915	0.00223952	0.00789949
	ENSMUSG00000002603.16	Tgfb1	0.484161	6.24142	105.737	4.00611e-10	3.375e-08
	ENSMUSG00000002608.9	Ccdc97	0.383168	5.98087	130.569	5.09228e-11	8.13408e-09
	ENSMUSG00000002617.15	Zfp40	-0.177589	3.45118	1.7429	0.199621	0.307771
	ENSMUSG00000002625.11	Akap8l	-0.0627869	7.08581	1.92637	0.178314	0.281872
	ENSMUSG00000002633.5	Shh	-0.135389	3.44585	0.78614	0.384349	0.508201
	ENSMUSG00000002635.12	Pdcd2l	0.149015	3.46355	3.31412	0.0815836	0.152197
	ENSMUSG00000002658.10	Gtf2f1	0.177224	5.20108	7.15067	0.0134788	0.0349787
	ENSMUSG00000002660.9	Clpp	0.096956	4.31837	2.4082	0.134207	0.226094
	ENSMUSG00000002661.15	Alkbh7	0.0541933	2.97592	0.321406	0.576196	0.685205
	ENSMUSG00000002668.9	Dennd1c	0.0717781	4.71929	0.705665	0.409442	0.532378
	ENSMUSG00000002679.15	Med6	-0.084374	3.84477	1.5243	0.229302	0.342216
	ENSMUSG00000002688.9	Prkd1	-0.22779	4.5797	12.6712	0.00164638	0.00612702
	ENSMUSG00000002699.14	Lcp2	0.445368	4.46488	26.4152	3.19921e-05	0.000232851
	ENSMUSG00000002718.15	Cse1l	0.175094	5.49215	11.0818	0.0028898	0.00976652
	ENSMUSG00000002728.15	Naa20	0.128365	4.94797	4.66334	0.041362	0.0878685
	ENSMUSG00000002731.7	Prkra	-0.159002	3.87596	9.35278	0.00552726	0.0167227
	ENSMUSG00000002732.15	Fkbp7	-0.215003	4.29915	10.9886	0.00298953	0.0100587
	ENSMUSG00000002733.9	Plekha3	0.0481076	5.44185	1.04848	0.316394	0.437106
	ENSMUSG00000002741.10	Ykt6	0.235192	6.66859	30.1112	1.35337e-05	0.000115877
	ENSMUSG00000002748.8	Baz1b	-0.227599	7.05401	30.5661	1.22269e-05	0.000106463
	ENSMUSG00000002763.17	Pex6	0.290945	5.89375	39.8756	1.82554e-06	2.24605e-05
	ENSMUSG00000002767.14	Mrpl2	0.104353	4.33197	3.73916	0.0654149	0.127034
	ENSMUSG00000002768.9	Mea1	0.0471392	5.24445	1.17793	0.288902	0.407717
	ENSMUSG00000002769.10	Gnmt	0.137848	2.14655	1.86403	0.185226	0.29056
	ENSMUSG00000002771.13	Grin2d	0.300905	2.61428	6.07627	0.0215021	0.0515431
	ENSMUSG00000002778.15	Kdelr1	0.0888996	6.81737	6.31058	0.0193803	0.0474081
	ENSMUSG00000002781.20	Tmem143	0.0336815	3.62301	0.0931276	0.762953	0.83554
	ENSMUSG00000002797.10	Ggct	-0.238323	2.86166	4.84257	0.0379588	0.081825
	ENSMUSG00000002799.7	Jag2	0.40213	5.42938	15.324	0.000684321	0.00296863
	ENSMUSG00000002803.15	Btbd6	0.160219	4.31572	4.62576	0.0421184	0.0891929
	ENSMUSG00000002804.5	Nudt14	0.197899	3.94456	13.3344	0.001313	0.00509965
	ENSMUSG00000002808.8	Epdr1	0.0524057	4.22431	0.593217	0.448933	0.570207
	ENSMUSG00000002812.5	Flii	0.0530774	7.57134	1.74626	0.199204	0.307318
	ENSMUSG00000002814.16	Top3a	-0.235696	3.78669	25.9174	3.61075e-05	0.000257432
	ENSMUSG00000002820.7	Atg4d	0.191803	5.04861	19.7389	0.000182585	0.0010016
	ENSMUSG00000002825.9	Qtrt1	0.348317	3.00144	23.056	7.43115e-05	0.000470047
	ENSMUSG00000002831.15	Plin4	-0.412705	5.06085	1.32021	0.262238	0.378542
	ENSMUSG00000002833.12	Hdgfl2	0.277583	6.11271	34.2371	5.56032e-06	5.65072e-05
	ENSMUSG00000002835.10	Chaf1a	0.371958	3.94693	17.1392	0.000389949	0.00187647
	ENSMUSG00000002844.10	Adprh	0.330573	5.71058	56.6883	1.11382e-07	2.45413e-06
	ENSMUSG00000002845.15	Tmem39a	0.0585978	4.67862	0.895867	0.353626	0.476391
	ENSMUSG00000002846.10	Timmdc1	0.232581	3.49199	16.8452	0.000426312	0.00202133
	ENSMUSG00000002847.8	Pla1a	0.233254	0.439096	0.459834	0.504394	0.620845
	ENSMUSG00000002870.9	Mcm2	0.504191	4.41726	65.0752	3.43268e-08	9.87831e-07
	ENSMUSG00000002871.15	Tpra1	0.195576	5.82235	26.812	2.90774e-05	0.000216147
	ENSMUSG00000002881.15	Nab1	0.157579	6.28774	7.17865	0.0133199	0.0346438
	ENSMUSG00000002885.15	Adgre5	-0.0641229	9.61087	1.51196	0.231138	0.344455
	ENSMUSG00000002897.6	Il17ra	0.105892	6.09909	2.22264	0.149443	0.246002
	ENSMUSG00000002900.18	Lamb1	-0.183955	7.40671	7.05881	0.0140152	0.036193
	ENSMUSG00000002908.18	Kcnn1	0.124453	0.990627	0.328362	0.572126	0.681659
	ENSMUSG00000002910.12	Arrdc2	0.256227	4.47681	9.64829	0.00493284	0.0152579
	ENSMUSG00000002944.16	Cd36	-0.155724	10.0273	5.17625	0.0324275	0.0721423
	ENSMUSG00000002948.20	Map2k7	0.016204	6.47597	0.252977	0.619718	0.722121
	ENSMUSG00000002949.16	Timm44	-0.076409	5.24772	2.51852	0.126023	0.214978
	ENSMUSG00000002957.12	Ap2a2	0.0660497	6.92447	1.97124	0.173533	0.275915
	ENSMUSG00000002963.18	Pnkp	0.186182	4.92795	10.8704	0.00312157	0.0104286
	ENSMUSG00000002968.10	Med25	0.434904	6.21304	105.816	3.97738e-10	3.36706e-08
	ENSMUSG00000002980.15	Bcam	0.200333	9.18258	14.7577	0.000820555	0.0034531
	ENSMUSG00000002981.11	Clptm1	0.281785	7.15953	67.6492	2.44699e-08	7.64752e-07
	ENSMUSG00000002983.18	Relb	0.259145	5.04245	11.7256	0.00229262	0.00803925
	ENSMUSG00000002984.18	Tomm40	0.426296	4.8117	40.3872	1.65858e-06	2.08687e-05
	ENSMUSG00000002985.17	Apoe	0.202521	9.26919	5.32803	0.0302149	0.0680951
	ENSMUSG00000002992.18	Apoc2	-0.510481	1.27178	4.47742	0.0452595	0.0944744
	ENSMUSG00000002996.18	Hbp1	-0.0824346	6.66317	2.94433	0.0994762	0.178272
	ENSMUSG00000002997.16	Prkar2b	-0.0154291	4.63036	0.0062291	0.937768	0.959769
	ENSMUSG00000003031.15	Cdkn1b	-0.295502	6.27353	15.7664	0.000595079	0.00264262
	ENSMUSG00000003032.9	Klf4	0.77728	7.20603	72.6299	1.30568e-08	4.64688e-07
	ENSMUSG00000003033.16	Ap1m1	0.27567	5.95709	33.9531	5.89863e-06	5.89491e-05
	ENSMUSG00000003037.17	Rab8a	0.184986	6.12453	22.4198	8.78138e-05	0.000538675
	ENSMUSG00000003038.16	Hmgn2	0.100983	6.70016	2.3891	0.135687	0.228094
	ENSMUSG00000003039.10	Fam32a	0.0593685	6.80641	1.42359	0.244847	0.359903
	ENSMUSG00000003051.14	Elf3	0.284299	4.85677	10.6844	0.00334236	0.0110498
	ENSMUSG00000003062.14	Stard3nl	0.0335755	5.44967	0.613351	0.441433	0.563349
	ENSMUSG00000003068.18	Stk11	0.266497	6.98516	39.0144	2.14933e-06	2.56551e-05
	ENSMUSG00000003070.7	Efna2	0.253211	1.2339	2.11396	0.159327	0.258586
	ENSMUSG00000003072.16	Atp5d	0.319213	6.74627	50.4049	2.93127e-07	5.1638e-06
	ENSMUSG00000003099.12	Ppp5c	0.259965	6.0654	35.0207	4.73152e-06	4.94386e-05
	ENSMUSG00000003119.15	Cdk12	-0.447872	5.42206	66.2758	2.92773e-08	8.69556e-07
	ENSMUSG00000003123.16	Lipe	0.163143	6.51413	0.783538	0.385124	0.508917
	ENSMUSG00000003131.8	Pafah1b2	0.0534736	6.49335	1.26618	0.271965	0.389042
	ENSMUSG00000003134.11	Tbc1d8	0.154144	5.8892	5.7783	0.0245827	0.0576206
	ENSMUSG00000003135.16	Cnot11	0.0430201	4.91602	0.772313	0.388494	0.512376
	ENSMUSG00000003153.11	Slc2a3	-0.0702117	3.8344	0.368357	0.549782	0.661628
	ENSMUSG00000003154.16	Foxj2	-0.20738	6.13518	15.4251	0.000662708	0.00288982
	ENSMUSG00000003161.16	Sri	0.0465038	6.83758	1.40756	0.247443	0.362588
	ENSMUSG00000003166.21	Dgcr2	0.145416	7.00373	11.9756	0.00209833	0.00749841
	ENSMUSG00000003184.16	Irf3	0.155189	6.403	16.7496	0.000438928	0.00206431
	ENSMUSG00000003190.13	Bcl2l12	0.113769	3.88043	4.0809	0.0550368	0.1106
	ENSMUSG00000003198.11	Zfp959	0.154891	3.19867	1.43635	0.242804	0.35767
	ENSMUSG00000003199.17	Mpnd	0.334157	5.1538	32.2744	8.41651e-06	7.85455e-05
	ENSMUSG00000003200.11	Sh3gl1	0.359912	5.76725	78.7023	6.33995e-09	2.64503e-07
	ENSMUSG00000003206.8	Ebi3	0.182613	1.73231	1.94721	0.176073	0.279231
	ENSMUSG00000003208.10	Yju2	0.140953	3.6637	4.78347	0.039045	0.0838245
	ENSMUSG00000003226.8	Ranbp2	-0.208569	6.65859	10.9518	0.00302994	0.0101711
	ENSMUSG00000003227.5	Edar	-0.254003	1.08792	2.07696	0.16287	0.263098
	ENSMUSG00000003228.10	Grk5	-0.227845	6.87462	30.613	1.21002e-05	0.000105614
	ENSMUSG00000003233.13	Dvl3	0.0961428	5.86643	5.34397	0.0299925	0.067725
	ENSMUSG00000003234.17	Abcf3	0.0169474	5.60081	0.147876	0.704068	0.790818
	ENSMUSG00000003235.14	Eif2b5	0.0667415	5.64485	2.38417	0.136072	0.228499
	ENSMUSG00000003269.19	Cyth2	0.0977995	5.64592	3.67533	0.0675914	0.130448
	ENSMUSG00000003271.18	Sult2b1	-0.119556	1.25563	0.490374	0.490709	0.609202
	ENSMUSG00000003273.15	Car11	-0.140541	1.14838	0.306063	0.585387	0.69314
	ENSMUSG00000003282.10	Plag1	-0.943631	0.150704	23.6443	6.38201e-05	0.000414501
	ENSMUSG00000003283.16	Hck	0.1173	5.88791	3.2581	0.0840389	0.155805
	ENSMUSG00000003299.11	Mrpl4	0.220897	5.79861	44.4354	7.97683e-07	1.15156e-05
	ENSMUSG00000003308.16	Keap1	0.0686851	6.27827	2.30901	0.142108	0.236247
	ENSMUSG00000003309.15	Ap1m2	-0.0250719	4.60997	0.285679	0.652331	0.749723
	ENSMUSG00000003316.15	Glg1	-0.45038	7.12848	93.0032	1.3562e-09	8.47698e-08
	ENSMUSG00000003344.16	Btbd2	0.363817	5.72535	37.5287	2.86455e-06	3.23961e-05
	ENSMUSG00000003345.17	Csnk1g2	0.190264	7.06004	19.1693	0.000214675	0.00114068
	ENSMUSG00000003346.15	Abhd17a	0.540245	5.68556	92.8221	1.38125e-09	8.59937e-08
	ENSMUSG00000003348.11	Mob3a	0.430132	5.7144	49.4715	3.40878e-07	5.8166e-06
	ENSMUSG00000003352.15	Cacnb3	0.257536	4.89458	21.3096	0.000118224	0.000692471
	ENSMUSG00000003354.7	Ccdc65	-0.0237982	3.07987	0.0370539	0.849027	0.899525
	ENSMUSG00000003355.8	Fkbp11	0.177523	2.06094	1.1186	0.301084	0.421224
	ENSMUSG00000003360.16	Ddx23	0.0362037	6.65639	1.49379	0.233875	0.347643
	ENSMUSG00000003363.16	Pld3	0.358295	6.69126	50.832	2.73748e-07	4.94703e-06
	ENSMUSG00000003378.10	Grik5	0.227293	4.62416	10.4966	0.00358286	0.0117204
	ENSMUSG00000003379.8	Cd79a	-0.0929475	5.62941	0.255637	0.617893	0.720524
	ENSMUSG00000003380.12	Rabac1	0.201557	7.20634	18.2716	0.000278411	0.00142046
	ENSMUSG00000003382.19	Etv3	-0.266331	6.08735	28.7254	1.85448e-05	0.00015028
	ENSMUSG00000003402.15	Prkcsh	0.298962	6.19137	53.7094	1.74448e-07	3.43362e-06
	ENSMUSG00000003411.11	Rab3b	-0.28266	-0.215878	1.43031	0.243767	0.358527
	ENSMUSG00000003418.12	St8sia6	0.134289	2.44882	0.61378	0.441276	0.56323
	ENSMUSG00000003420.9	Fcgrt	0.139701	6.61552	5.12131	0.0332726	0.0736907
	ENSMUSG00000003421.14	Nosip	0.168515	5.6339	12.9757	0.00148307	0.00562123
	ENSMUSG00000003423.16	Pih1d1	0.216336	4.60615	15.2027	0.000711281	0.00306803
	ENSMUSG00000003429.12	Rps11	0.039066	8.15598	0.3992	0.533666	0.648885
	ENSMUSG00000003435.10	Supt5	0.157854	7.19248	17.3938	0.000361178	0.00176135
	ENSMUSG00000003437.15	Paf1	0.137809	6.25293	12.1257	0.00199034	0.00717286
	ENSMUSG00000003438.18	Timm50	0.276922	4.38693	23.3622	6.86353e-05	0.000440534
	ENSMUSG00000003444.9	Med29	0.253849	3.62752	10.3026	0.00385125	0.0124236
	ENSMUSG00000003452.16	Bicd1	0.100041	1.7397	0.584466	0.452257	0.572968
	ENSMUSG00000003458.13	Ncstn	0.22904	7.17197	49.5276	3.37783e-07	5.78645e-06
	ENSMUSG00000003464.14	Pex19	0.0413847	6.37509	1.21363	0.281888	0.40002
	ENSMUSG00000003469.10	Phyhip	-0.271946	0.533603	1.61051	0.216977	0.327862
	ENSMUSG00000003476.17	Crhr2	-0.24946	0.0680392	0.702889	0.410351	0.533003
	ENSMUSG00000003477.6	Inmt	-0.184452	10.902	6.78006	0.015793	0.0399442
	ENSMUSG00000003484.5	Cyp4f18	0.250375	3.66493	5.51055	0.0277746	0.0636239
	ENSMUSG00000003500.14	Impdh1	0.199622	7.51057	10.8428	0.00315325	0.0105223
	ENSMUSG00000003518.14	Dusp3	0.0676157	7.86084	1.75137	0.198571	0.306689
	ENSMUSG00000003526.13	Prodh	0.0484701	4.51552	0.375019	0.546224	0.658772
	ENSMUSG00000003527.10	Ess2	0.0544484	4.73488	1.47335	0.237004	0.351246
	ENSMUSG00000003528.16	Slc25a1	0.446975	6.17321	6.44017	0.0183073	0.0450997
	ENSMUSG00000003531.16	Dgcr6	0.160445	4.67917	6.29772	0.0194904	0.0476175
	ENSMUSG00000003534.18	Ddr1	0.247813	6.62605	38.9712	2.16714e-06	2.5797e-05
	ENSMUSG00000003541.7	Ier3	-0.634078	7.1287	26.9801	2.79302e-05	0.000209134
	ENSMUSG00000003545.4	Fosb	-0.27912	4.62099	0.173151	0.681143	0.772632
	ENSMUSG00000003546.11	Klc4	0.103993	5.02355	4.57374	0.0431911	0.0909785
	ENSMUSG00000003549.10	Ercc1	0.00763143	4.20369	0.0249116	0.87595	0.918024
	ENSMUSG00000003559.9	As3mt	-0.0756732	4.65527	1.6892	0.206445	0.315656
	ENSMUSG00000003573.16	Homer3	0.216275	5.65051	5.46181	0.028404	0.0648432
	ENSMUSG00000003575.14	Crtc1	0.117402	4.9707	6.90493	0.0149675	0.0381941
	ENSMUSG00000003581.15	Rnf215	0.179838	5.91769	15.3915	0.000669822	0.00291152
	ENSMUSG00000003585.14	Sec14l2	0.649096	4.30877	74.68	1.01791e-08	3.8423e-07
	ENSMUSG00000003604.15	Aven	0.386216	3.2599	18.6303	0.000250758	0.00129936
	ENSMUSG00000003617.17	Cp	-0.147358	8.37152	3.4529	0.0758477	0.143632
	ENSMUSG00000003623.5	Crot	0.0806591	4.92905	2.73228	0.11178	0.195441
	ENSMUSG00000003644.18	Rps6ka1	0.148332	6.50407	12.8109	0.00156913	0.00589278
	ENSMUSG00000003660.11	Snrnp200	-0.223167	7.08788	30.8421	1.15014e-05	0.000101249
	ENSMUSG00000003662.11	Ciao1	0.0422622	5.3559	1.07576	0.310315	0.430996
	ENSMUSG00000003665.8	Has1	0.728327	0.733097	6.43802	0.0183245	0.0451358
	ENSMUSG00000003680.17	Taf6l	0.285152	2.64802	9.01955	0.00629365	0.0185931
	ENSMUSG00000003721.15	Insig2	0.0973372	5.49657	3.18206	0.087509	0.160808
	ENSMUSG00000003731.14	Kpna6	-0.213103	6.39098	25.3922	4.10825e-05	0.000287258
	ENSMUSG00000003746.17	Man1a	-0.161421	5.75662	4.37748	0.0475246	0.0982784
	ENSMUSG00000003752.10	Itpkc	0.290524	3.99628	11.9134	0.00214488	0.00761802
	ENSMUSG00000003762.14	Coq8b	0.162272	5.0128	5.73311	0.0250915	0.05855
	ENSMUSG00000003778.15	Brd8	-0.133063	6.07302	14.2739	0.000960542	0.0039451
	ENSMUSG00000003779.17	Kif20a	1.48615	2.52472	27.9951	2.19716e-05	0.000173142
	ENSMUSG00000003808.19	Farsa	0.184316	4.90973	12.3666	0.00182963	0.00668627
	ENSMUSG00000003809.15	Gcdh	-0.0795442	4.59792	2.58671	0.121259	0.208524
	ENSMUSG00000003810.15	Mast2	0.0506284	5.92665	1.14955	0.294645	0.41408
	ENSMUSG00000003812.14	Dnase2a	-0.178509	4.84124	14.3528	0.000936039	0.00385991
	ENSMUSG00000003813.16	Rad23a	0.0794955	5.97172	2.78467	0.108582	0.19098
	ENSMUSG00000003814.9	Calr	0.175198	9.18793	9.10554	0.00608529	0.0180817
	ENSMUSG00000003824.13	Syce2	-0.114275	1.41443	0.62599	0.436827	0.559106
	ENSMUSG00000003847.17	Nfat5	-0.306975	7.13297	14.9981	0.00075942	0.00324596
	ENSMUSG00000003848.15	Nob1	0.326511	4.44492	47.7627	4.51712e-07	7.22698e-06
	ENSMUSG00000003849.9	Nqo1	-0.718788	2.90977	3.12919	0.0900195	0.164572
	ENSMUSG00000003863.19	Ppfia3	0.161596	-0.133428	0.81555	0.452998	0.573616
	ENSMUSG00000003865.17	Gys1	0.0714326	5.37596	1.26176	0.272783	0.390083
	ENSMUSG00000003868.15	Ruvbl2	0.331688	5.32976	34.052	5.77829e-06	5.81128e-05
	ENSMUSG00000003873.12	Bax	0.575781	5.2937	132.928	4.2612e-11	7.13682e-09
	ENSMUSG00000003882.6	Il7r	0.575762	4.21111	15.65	0.000617263	0.00272242
	ENSMUSG00000003923.15	Tfam	-0.0894257	4.78513	3.17197	0.0879821	0.161456
	ENSMUSG00000003929.12	Zfp81	-0.372625	3.42075	22.4721	8.66089e-05	0.000534267
	ENSMUSG00000003934.6	Efnb3	-0.0301695	0.885716	0.0199133	0.888995	0.926227
	ENSMUSG00000003948.18	Mmd	-0.0579532	5.88625	0.581246	0.45349	0.574113
	ENSMUSG00000003949.17	Hlf	-0.134873	4.74197	0.614461	0.441026	0.562993
	ENSMUSG00000003955.9	Fam162a	-0.0600085	4.40319	0.882501	0.357175	0.479653
	ENSMUSG00000003970.10	Rpl8	0.161937	8.64095	12.9459	0.0014982	0.00566625
	ENSMUSG00000003992.16	Ssbp2	0.072372	3.92338	0.769106	0.389465	0.513253
	ENSMUSG00000004018.10	Fancl	-0.0224504	2.57205	0.0331215	0.857165	0.904959
	ENSMUSG00000004032.11	Gstm5	0.0616957	3.02371	0.434385	0.51632	0.632133
	ENSMUSG00000004035.13	Gstm7	0.0889282	2.64903	0.354604	0.557271	0.668104
	ENSMUSG00000004040.17	Stat3	0.168989	8.02952	18.0232	0.000299506	0.00150521
	ENSMUSG00000004043.15	Stat5a	-0.0101127	4.75886	0.0260271	0.873228	0.916204
	ENSMUSG00000004044.10	Cavin1	-0.0598844	9.36016	2.27894	0.144612	0.239541
	ENSMUSG00000004054.10	Map3k11	0.339784	7.10917	28.3293	2.03246e-05	0.000162513
	ENSMUSG00000004056.16	Akt2	0.230932	7.29699	33.2325	6.86173e-06	6.65157e-05
	ENSMUSG00000004069.18	Dnaja3	0.275138	5.56567	46.6421	5.4536e-07	8.4388e-06
	ENSMUSG00000004070.16	Hmox2	-0.0510704	5.75437	1.06051	0.313694	0.434616
	ENSMUSG00000004071.14	Cdip1	0.0493126	6.40869	1.29639	0.266469	0.382938
	ENSMUSG00000004085.15	Map3k20	-0.194711	6.36922	26.7915	2.92201e-05	0.000216767
	ENSMUSG00000004096.10	Cwc15	-0.146897	5.65932	9.00566	0.00632804	0.0186725
	ENSMUSG00000004098.8	Col5a3	0.360365	3.42044	6.88267	0.0151111	0.0384874
	ENSMUSG00000004099.17	Dnmt1	0.0213804	5.91932	0.228827	0.636862	0.736293
	ENSMUSG00000004100.13	Ppan	0.351557	4.52286	29.2162	1.65706e-05	0.000136631
	ENSMUSG00000004105.9	Angptl2	0.136217	7.18217	2.55996	0.123102	0.211069
	ENSMUSG00000004110.18	Cacna1e	-0.306376	1.95083	1.60484	0.217762	0.32887
	ENSMUSG00000004113.19	Cacna1b	-0.0771245	0.682375	0.0797722	0.780105	0.847828
	ENSMUSG00000004127.13	Trmt10a	0.0483349	2.35021	0.182225	0.673395	0.766136
	ENSMUSG00000004151.18	Etv1	-0.460809	3.75224	28.0269	2.18087e-05	0.000172014
	ENSMUSG00000004187.12	Kifc2	-0.0262845	4.46774	0.17669	0.678092	0.770224
	ENSMUSG00000004207.15	Psap	0.216258	10.2163	17.4615	0.000353921	0.0017308
	ENSMUSG00000004221.17	Ikbkg	-0.157943	5.68299	5.09853	0.0336302	0.0743656
	ENSMUSG00000004233.15	Wars2	-0.184605	3.29235	4.77268	0.0392471	0.0841443
	ENSMUSG00000004263.16	Atn1	0.528767	7.13426	102.596	5.34925e-10	4.18321e-08
	ENSMUSG00000004264.18	Phb2	0.231058	6.07992	49.802	3.23069e-07	5.60039e-06
	ENSMUSG00000004266.16	Ptpn6	0.159458	6.10275	3.84926	0.0618461	0.121539
	ENSMUSG00000004267.17	Eno2	0.331523	2.40182	10.0396	0.00425115	0.0134792
	ENSMUSG00000004268.12	Emg1	0.161444	5.65868	22.8639	7.81334e-05	0.000489956
	ENSMUSG00000004270.14	Lpcat3	0.211856	5.89547	17.9848	0.000302919	0.00151886
	ENSMUSG00000004285.13	Atp6v1f	0.145883	5.87916	7.56474	0.0113268	0.0302585
	ENSMUSG00000004296.15	Il12b	0.285433	0.436856	0.659577	0.424947	0.547315
	ENSMUSG00000004317.15	Clcn5	-0.0679984	3.6604	1.02824	0.32101	0.441943
	ENSMUSG00000004319.16	Clcn3	-0.29327	5.50302	14.2903	0.000955382	0.0039276
	ENSMUSG00000004328.16	Hif3a	0.378179	2.25749	3.43562	0.0765361	0.1447
	ENSMUSG00000004347.18	Pde1c	-0.26187	0.452655	0.742524	0.397653	0.521209
	ENSMUSG00000004356.9	Utp20	-0.0900963	4.24716	1.53938	0.227083	0.339428
	ENSMUSG00000004359.17	Spic	-0.430619	0.128473	2.04224	0.166282	0.267262
	ENSMUSG00000004360.10	9330159F19Rik	-0.0524544	1.90175	0.174934	0.679601	0.771335
	ENSMUSG00000004364.15	Cul3	-0.0138638	6.50256	0.0378722	0.84739	0.898665
	ENSMUSG00000004371.16	Il11	0.0249683	-0.335594	0.0150031	0.903566	0.936641
	ENSMUSG00000004383.19	Large1	-0.101044	4.77876	3.10121	0.0913818	0.166626
	ENSMUSG00000004393.11	Ddx56	0.102014	4.66615	3.73604	0.0655196	0.127167
	ENSMUSG00000004394.13	Tmed4	0.0422165	6.44715	1.18353	0.287787	0.406571
	ENSMUSG00000004415.16	Col26a1	0.0391973	-0.0851989	0.0290663	0.866101	0.911028
	ENSMUSG00000004446.13	Bid	0.191009	3.60927	7.02914	0.0141935	0.0365506
	ENSMUSG00000004451.15	Ralb	-0.0834481	6.34949	2.79195	0.108146	0.190463
	ENSMUSG00000004455.17	Ppp1cc	0.230824	7.22909	33.4938	6.49404e-06	6.39467e-05
	ENSMUSG00000004460.18	Dnajb11	0.140886	6.30639	10.7088	0.00331245	0.0109641
	ENSMUSG00000004462.8	Tbccd1	-0.0417042	4.07478	0.783725	0.385068	0.508917
	ENSMUSG00000004473.11	Clec11a	1.0565	3.2439	42.7815	1.06975e-06	1.4523e-05
	ENSMUSG00000004500.10	Zfp324	-0.236584	3.68098	12.3878	0.00181618	0.00664775
	ENSMUSG00000004508.7	Gab2	-0.384955	5.98896	47.6564	4.59798e-07	7.34288e-06
	ENSMUSG00000004530.13	Coro1c	0.226092	7.44135	38.3927	2.42174e-06	2.82683e-05
	ENSMUSG00000004535.13	Tax1bp1	-0.00259939	7.70602	0.00504078	0.944006	0.963848
	ENSMUSG00000004540.8	Psg17	0.129815	-0.369134	0.258618	0.615863	0.718937
	ENSMUSG00000004552.17	Ctse	-0.316751	0.862839	1.54873	0.225722	0.338001
	ENSMUSG00000004558.16	Ndrg2	0.083327	6.7694	0.892831	0.354427	0.476955
	ENSMUSG00000004561.15	Mettl17	-0.0333759	4.17981	0.336934	0.567188	0.6774
	ENSMUSG00000004562.17	Arhgef40	-0.0838982	5.86328	1.77079	0.196187	0.304089
	ENSMUSG00000004565.16	Pnpla6	-0.140481	5.74232	9.64616	0.00493688	0.0152628
	ENSMUSG00000004567.17	Mcoln1	-0.0240401	5.85641	0.373761	0.546893	0.659334
	ENSMUSG00000004568.14	Arhgef18	-0.200629	6.99097	30.9968	1.11154e-05	9.82971e-05
	ENSMUSG00000004591.17	Pkn2	-0.232388	5.89629	13.2055	0.00137155	0.00528118
	ENSMUSG00000004609.12	Cd33	0.0293549	4.0575	0.109035	0.744203	0.821454
	ENSMUSG00000004610.5	Etfb	0.127893	5.99328	2.74758	0.110834	0.194236
	ENSMUSG00000004612.10	Nkg7	1.82646	3.66006	146.302	1.62924e-11	3.70214e-09
	ENSMUSG00000004626.15	Stxbp2	0.083904	6.16362	6.64534	0.0167407	0.0418613
	ENSMUSG00000004631.16	Sgce	0.0350456	5.90622	0.342609	0.563965	0.674502
	ENSMUSG00000004633.18	Chn2	0.010028	3.41427	0.0127197	0.911172	0.941976
	ENSMUSG00000004637.16	Wwox	-0.0828846	3.54975	0.913278	0.349077	0.471683
	ENSMUSG00000004642.14	Slbp	0.368497	4.73257	32.2633	8.43654e-06	7.86344e-05
	ENSMUSG00000004655.6	Aqp1	0.141882	10.0762	8.82615	0.00679156	0.0198123
	ENSMUSG00000004661.16	Arid3b	-0.281551	4.95555	40.4114	1.65111e-06	2.08177e-05
	ENSMUSG00000004665.11	Cnn2	0.227459	8.59861	21.2233	0.000121028	0.000706124
	ENSMUSG00000004667.19	Polr2e	0.150687	5.86874	11.9707	0.00210192	0.00750212
	ENSMUSG00000004677.19	Myo9b	-0.306023	6.6768	76.5709	8.12828e-09	3.22891e-07
	ENSMUSG00000004698.12	Hdac9	-0.375251	3.17738	13.1944	0.00137669	0.00529631
	ENSMUSG00000004707.15	Ly9	0.493881	3.6791	18.4073	0.000267576	0.00137324
	ENSMUSG00000004709.15	Cd244a	-0.229986	3.07869	6.14203	0.0208817	0.0503046
	ENSMUSG00000004730.16	Adgre1	0.472872	4.80289	25.4783	4.02175e-05	0.000282576
	ENSMUSG00000004748.6	Mtfp1	0.168212	2.23056	1.70237	0.204745	0.313784
	ENSMUSG00000004768.15	Rab23	-0.107777	4.66652	2.57864	0.121812	0.209289
	ENSMUSG00000004771.13	Rab11a	0.120106	6.51846	4.45064	0.0458543	0.0954852
	ENSMUSG00000004788.12	Eif2b2	0.244687	5.03522	31.4888	9.97837e-06	9.00688e-05
	ENSMUSG00000004789.11	Dlst	0.252101	7.0073	37.3559	2.96329e-06	3.34261e-05
	ENSMUSG00000004791.8	Pgf	0.259979	2.57799	2.78538	0.108539	0.190943
	ENSMUSG00000004798.15	Ulk2	-0.119876	6.03725	3.63355	0.0690604	0.132871
	ENSMUSG00000004814.11	Ccl24	-0.932884	-0.00430888	8.02101	0.0093845	0.0258769
	ENSMUSG00000004815.13	Dgkq	-0.248841	4.91668	13.9235	0.00107819	0.00433237
	ENSMUSG00000004837.3	Grap	0.144034	6.74606	13.5617	0.00121637	0.0047797
	ENSMUSG00000004843.8	Chmp2b	0.0796914	5.72041	2.13725	0.157145	0.256021
	ENSMUSG00000004846.11	Plod3	0.232327	6.53537	16.5688	0.0004639	0.00215674
	ENSMUSG00000004849.15	Ap1s1	0.219799	5.49135	33.235	6.858e-06	6.65157e-05
	ENSMUSG00000004864.14	Mapk13	0.518587	3.52019	37.7399	2.74872e-06	3.13505e-05
	ENSMUSG00000004865.17	Srpk1	0.142219	6.02021	11.7828	0.00224642	0.00791902
	ENSMUSG00000004880.12	Lbr	0.199271	6.14341	25.2896	4.21382e-05	0.000293107
	ENSMUSG00000004891.17	Nes	0.0420919	7.60574	0.232205	0.634398	0.734085
	ENSMUSG00000004892.14	Bcan	-0.110119	3.08641	0.592103	0.449354	0.570492
	ENSMUSG00000004895.10	Prcc	0.322095	5.28789	39.0539	2.13319e-06	2.55149e-05
	ENSMUSG00000004896.17	Rrnad1	-0.114935	5.24493	6.55321	0.017425	0.0432315
	ENSMUSG00000004897.17	Hdgf	0.173063	7.39741	33.7981	6.0926e-06	6.06491e-05
	ENSMUSG00000004902.8	Slc25a18	0.0163082	0.587534	0.00514196	0.943448	0.96356
	ENSMUSG00000004929.13	Thop1	0.247672	4.26926	17.3299	0.000368171	0.00178945
	ENSMUSG00000004931.12	Apba3	0.427979	4.94471	55.2286	1.38468e-07	2.86106e-06
	ENSMUSG00000004933.18	Matk	0.111323	1.65608	0.423479	0.521585	0.637327
	ENSMUSG00000004934.15	Pias4	0.19993	4.58398	10.7604	0.00325011	0.0107918
	ENSMUSG00000004936.9	Map2k1	0.232481	6.26808	28.3261	2.03398e-05	0.00016256
	ENSMUSG00000004937.7	Sgta	0.23834	6.27254	39.7386	1.87329e-06	2.28939e-05
	ENSMUSG00000004945.16	Tmem242	-0.117064	4.99732	4.36687	0.0477724	0.0986505
	ENSMUSG00000004947.16	Dtx2	0.519253	4.47489	60.4226	6.49775e-08	1.61416e-06
	ENSMUSG00000004951.11	Hspb1	0.334289	6.91635	7.04311	0.0141092	0.0363927
	ENSMUSG00000004952.14	Rasa4	-0.294544	4.80341	4.89496	0.0370243	0.080247
	ENSMUSG00000004961.8	Syt5	-0.179609	3.67139	2.05655	0.164865	0.26545
	ENSMUSG00000004980.17	Hnrnpa2b1	0.0418702	8.93497	0.913634	0.348985	0.471633
	ENSMUSG00000004994.13	Ccdc130	0.0618927	3.64409	1.0647	0.353753	0.476444
	ENSMUSG00000004996.10	Mri1	0.0137724	4.20247	0.0619734	0.921383	0.948188
	ENSMUSG00000005034.16	Prkacb	-0.00952311	6.67515	0.0773357	0.783399	0.850825
	ENSMUSG00000005043.14	Sgsh	0.0332078	5.65599	0.318145	0.578125	0.68682
	ENSMUSG00000005045.17	Chd5	-0.238365	1.90208	1.62546	0.214925	0.325438
	ENSMUSG00000005054.8	Cstb	0.0151698	5.17636	0.0587234	0.81065	0.871412
	ENSMUSG00000005057.14	Sh2b2	0.515736	2.75893	9.16545	0.00594462	0.0177514
	ENSMUSG00000005069.13	Pex5	0.265262	5.35952	61.7945	5.36347e-08	1.3895e-06
	ENSMUSG00000005078.17	Jkamp	0.0066335	4.70599	0.0181605	0.893961	0.929956
	ENSMUSG00000005087.18	Cd44	0.193645	7.12128	10.5805	0.00347312	0.0114085
	ENSMUSG00000005089.16	Slc1a2	0.0624609	2.06165	0.145915	0.705939	0.791849
	ENSMUSG00000005102.14	Eif2ak4	-0.290828	4.35795	25.4007	4.09963e-05	0.000286892
	ENSMUSG00000005103.13	Wdr1	0.444368	7.62985	188.994	1.17995e-12	6.05209e-10
	ENSMUSG00000005107.14	Slc2a9	-0.12883	3.36502	2.37972	0.136421	0.228931
	ENSMUSG00000005124.11	Ccn4	0.131879	2.89504	0.244547	0.625581	0.726711
	ENSMUSG00000005125.14	Ndrg1	0.0708463	5.54148	0.690932	0.414302	0.536817
	ENSMUSG00000005131.5	4930550C14Rik	-0.156361	1.21068	1.05436	0.315069	0.436031
	ENSMUSG00000005142.11	Man2b1	0.149326	7.11121	12.4993	0.00174718	0.00643892
	ENSMUSG00000005148.9	Klf5	0.218592	5.431	10.5364	0.00353035	0.0115703
	ENSMUSG00000005150.17	Wdr83	0.103932	4.24554	3.68239	0.0673465	0.130047
	ENSMUSG00000005161.16	Prdx2	0.0136909	6.65125	0.127215	0.724553	0.805989
	ENSMUSG00000005198.16	Polr2a	-0.148693	8.10035	13.5547	0.00121924	0.00478773
	ENSMUSG00000005204.13	Senp3	0.0682292	6.18889	2.70836	0.113276	0.197443
	ENSMUSG00000005220.11	Corin	-0.51909	2.27396	3.12373	0.0902835	0.164916
	ENSMUSG00000005225.16	Plekha8	0.0352243	3.98375	0.19158	0.665644	0.760294
	ENSMUSG00000005233.17	Spc25	0.361819	1.93251	8.34378	0.00823298	0.0232021
	ENSMUSG00000005237.15	Dnah2	-0.443798	3.94304	34.0042	5.83615e-06	5.86271e-05
	ENSMUSG00000005251.16	Ripk4	0.138844	4.94771	4.13498	0.0535723	0.108323
	ENSMUSG00000005262.14	Ufd1	-0.0282291	5.65685	0.476124	0.497013	0.614276
	ENSMUSG00000005267.14	Zfp287	-0.591166	3.13837	34.5074	5.25786e-06	5.41274e-05
	ENSMUSG00000005268.21	Prlr	-0.121964	-0.277555	0.154794	0.69758	0.785366
	ENSMUSG00000005299.7	Letm1	0.248407	5.89377	29.9739	1.39573e-05	0.000118674
	ENSMUSG00000005312.16	Ubqln1	0.0926697	6.84309	5.8235	0.0240854	0.0566835
	ENSMUSG00000005320.10	Fgfr4	0.206184	5.51707	6.91597	0.0148969	0.0380413
	ENSMUSG00000005338.15	Cadm3	0.139658	1.51285	0.369728	0.549047	0.661108
	ENSMUSG00000005354.17	Txn2	0.151199	6.30013	13.3867	0.00129006	0.0050234
	ENSMUSG00000005360.15	Slc1a3	-0.149214	5.59541	5.75472	0.0248468	0.0580913
	ENSMUSG00000005362.15	Crbn	-0.105192	4.90232	3.02599	0.0951635	0.172064
	ENSMUSG00000005364.12	Il5ra	-0.26777	0.668558	1.67226	0.208657	0.318185
	ENSMUSG00000005370.5	Msh6	0.0487781	4.73692	0.547135	0.466894	0.586822
	ENSMUSG00000005371.16	Fbxo11	-0.0754166	6.34022	0.860158	0.363222	0.485866
	ENSMUSG00000005373.14	Mlxipl	0.16961	3.28351	0.212091	0.649412	0.747136
	ENSMUSG00000005374.14	Tbl2	0.148103	4.82134	8.6915	0.00716374	0.0207026
	ENSMUSG00000005378.18	Bud23	0.162633	4.47251	6.56194	0.0173588	0.0431064
	ENSMUSG00000005397.9	Nid1	-0.157733	7.50912	2.48631	0.12835	0.218264
	ENSMUSG00000005410.7	Mcm5	1.09705	4.11642	101.611	5.86535e-10	4.50598e-08
	ENSMUSG00000005413.9	Hmox1	0.230285	5.38982	3.51123	0.0735762	0.14003
	ENSMUSG00000005417.18	Mprip	-0.0956986	9.40916	5.46504	0.0283618	0.0647639
	ENSMUSG00000005442.14	Cic	0.18216	7.55667	15.1218	0.000729906	0.0031375
	ENSMUSG00000005447.13	Pafah1b3	0.210897	3.52898	8.25517	0.00853279	0.0238926
	ENSMUSG00000005465.10	Il27ra	0.352116	3.52438	9.00425	0.00633155	0.0186797
	ENSMUSG00000005469.11	Prkaca	0.120036	6.47328	7.40469	0.01211	0.0320027
	ENSMUSG00000005470.9	Asf1b	1.57584	2.28232	71.0866	1.5805e-08	5.38327e-07
	ENSMUSG00000005481.19	Ddx39a	0.205153	5.96325	10.5671	0.00349035	0.0114586
	ENSMUSG00000005483.11	Dnajb1	0.584988	5.84577	28.2764	2.05762e-05	0.000163924
	ENSMUSG00000005501.15	Usp40	-0.233932	5.11682	20.0982	0.000165059	0.000919345
	ENSMUSG00000005505.13	Kbtbd4	0.0714716	4.3963	1.65774	0.210578	0.320638
	ENSMUSG00000005506.17	Celf1	-0.126988	6.74035	8.73677	0.00703617	0.0204007
	ENSMUSG00000005510.10	Ndufs3	-0.0622135	5.50172	1.05819	0.31421	0.435132
	ENSMUSG00000005514.15	Por	0.441445	8.29957	79.2649	5.94267e-09	2.50324e-07
	ENSMUSG00000005533.11	Igf1r	-0.464271	6.67457	123.198	9.0496e-11	1.21397e-08
	ENSMUSG00000005534.11	Insr	-0.322792	6.24889	46.9791	5.15155e-07	8.05721e-06
	ENSMUSG00000005540.11	Fcer2a	-0.462797	4.58363	7.76217	0.0104366	0.0282616
	ENSMUSG00000005547.15	Cyp2a5	0.382527	5.83518	0.61978	0.439081	0.561085
	ENSMUSG00000005566.15	Trim28	0.480277	6.79175	125.049	7.81124e-11	1.10748e-08
	ENSMUSG00000005575.17	Ube2m	0.259573	5.76125	54.0537	1.65485e-07	3.2944e-06
	ENSMUSG00000005580.12	Adcy9	-1.50294	4.54584	321.983	4.04007e-15	1.17425e-11
	ENSMUSG00000005583.17	Mef2c	-0.45461	5.14302	30.4295	1.26042e-05	0.00010903
	ENSMUSG00000005609.17	Ctr9	0.0630031	5.55636	3.7736	0.064274	0.125335
	ENSMUSG00000005610.18	Eif4g2	0.058156	9.26075	1.35365	0.256442	0.372303
	ENSMUSG00000005611.16	Irag1	0.379525	3.7828	7.21515	0.0131159	0.0342253
	ENSMUSG00000005615.16	Pcyt1a	-0.23892	6.87057	38.9131	2.19137e-06	2.60322e-05
	ENSMUSG00000005621.12	Zfp592	-0.0870568	6.40452	4.44028	0.0460867	0.0958505
	ENSMUSG00000005625.16	Psmd4	0.155831	6.42137	11.4088	0.00256762	0.00882125
	ENSMUSG00000005628.13	Tmod4	0.0865077	0.249321	0.151599	0.730074	0.810269
	ENSMUSG00000005640.12	Insrr	0.782858	-0.4386	5.41737	0.0289917	0.0659088
	ENSMUSG00000005656.10	Snx6	0.0201598	5.57553	0.0803946	0.779273	0.847188
	ENSMUSG00000005667.9	Mthfd2	0.706918	2.92717	19.021	0.000223998	0.00118516
	ENSMUSG00000005672.13	Kit	-0.421927	7.5914	19.0899	0.000219612	0.00116408
	ENSMUSG00000005674.10	Tomm40l	0.00377983	4.92078	0.00550884	0.941469	0.96235
	ENSMUSG00000005677.15	Nr1i3	0.217193	1.55432	1.64242	0.212627	0.323042
	ENSMUSG00000005682.10	Pan2	-0.329755	5.92488	56.0055	1.23257e-07	2.62773e-06
	ENSMUSG00000005683.9	Cs	0.152802	7.50032	5.14496	0.0329058	0.0730175
	ENSMUSG00000005686.18	Ampd3	0.0793552	5.53962	1.39623	0.249301	0.364637
	ENSMUSG00000005687.15	Bcas2	-0.0524801	5.37455	1.41536	0.246176	0.361308
	ENSMUSG00000005696.12	Sh2d1a	1.72552	0.387543	45.8331	6.26038e-07	9.42787e-06
	ENSMUSG00000005698.16	Ctcf	-0.136093	6.47537	17.4708	0.000352935	0.00172695
	ENSMUSG00000005699.17	Pard6a	0.343861	2.59224	17.8669	0.000313671	0.00156512
	ENSMUSG00000005705.11	Agrp	-0.543513	-0.0898736	2.60452	0.12005	0.206888
	ENSMUSG00000005718.9	Tfap4	-0.312263	2.73791	10.1166	0.00412953	0.0131678
	ENSMUSG00000005732.15	Ranbp1	0.101512	5.04073	3.03801	0.0945473	0.171252
	ENSMUSG00000005763.16	Cd247	0.695471	3.91369	43.1978	9.92873e-07	1.37092e-05
	ENSMUSG00000005774.13	Rfx5	-0.297431	5.24208	54.8171	1.47343e-07	3.01232e-06
	ENSMUSG00000005779.13	Psmb4	0.160369	6.36679	12.4307	0.00178927	0.00656217
	ENSMUSG00000005800.4	Mmp8	0.126185	2.04221	0.596615	0.447653	0.569245
	ENSMUSG00000005802.13	Slc30a4	-0.0862348	4.66717	0.825249	0.37297	0.49624
	ENSMUSG00000005803.15	Sqor	-0.167272	5.86709	6.76267	0.015912	0.0401983
	ENSMUSG00000005804.15	Bloc1s6	0.100514	4.94015	3.31787	0.081422	0.151993
	ENSMUSG00000005813.13	Metap1	0.24668	5.07017	38.9857	2.16117e-06	2.57612e-05
	ENSMUSG00000005823.10	Gpr108	0.183468	5.93092	26.5521	3.09519e-05	0.000227463
	ENSMUSG00000005824.8	Tnfsf14	0.417415	1.55661	5.5862	0.0268282	0.0619678
	ENSMUSG00000005836.11	Gata6	-0.0306522	5.47923	0.327394	0.572689	0.682087
	ENSMUSG00000005846.13	Rsl1d1	-0.00596306	5.59442	0.014815	0.904169	0.936998
	ENSMUSG00000005864.8	Cnga2	0.553354	0.976167	5.03218	0.0346966	0.0762539
	ENSMUSG00000005871.16	Apc	-0.254758	6.72332	13.7645	0.00113669	0.00452779
	ENSMUSG00000005873.7	Reep5	0.0885507	7.32809	8.1784	0.00880224	0.0245094
	ENSMUSG00000005881.14	Ergic3	0.154055	6.56014	16.7193	0.000443004	0.00207924
	ENSMUSG00000005882.19	Uqcc1	0.0137218	5.1637	0.0608146	0.807377	0.869062
	ENSMUSG00000005886.15	Ncoa2	-0.297894	5.68909	23.0142	7.5125e-05	0.000474173
	ENSMUSG00000005893.15	Nr2c2	-1.93567	4.66569	163.174	5.37244e-12	1.83706e-09
	ENSMUSG00000005897.15	Nr2c1	-0.109191	4.36267	3.35831	0.0797047	0.149411
	ENSMUSG00000005899.15	Smpd4	0.0962733	5.46913	8.11404	0.00903539	0.0250665
	ENSMUSG00000005907.15	Pex1	-0.240349	3.56847	6.94856	0.0146904	0.0376081
	ENSMUSG00000005917.16	Otx1	0.264416	1.04629	0.69149	0.414117	0.536656
	ENSMUSG00000005936.20	Kctd20	-0.0841387	6.78163	5.94258	0.0228277	0.0542252
	ENSMUSG00000005947.12	Itgae	-0.171714	2.96185	3.30604	0.0819326	0.152696
	ENSMUSG00000005949.10	Ctns	0.0663841	4.72814	2.07588	0.162976	0.263198
	ENSMUSG00000005950.15	P2rx5	0.319055	2.71556	15.3532	0.000678009	0.0029449
	ENSMUSG00000005951.14	Shpk	0.0332402	2.96458	0.1035	0.750543	0.826051
	ENSMUSG00000005958.16	Ephb3	0.0817612	5.83749	1.7403	0.199945	0.308106
	ENSMUSG00000005968.15	Tuft1	-0.11022	4.97309	1.7225	0.20218	0.310618
	ENSMUSG00000005973.7	Rcn1	-0.00919939	6.28723	0.0392451	0.844686	0.896669
	ENSMUSG00000005980.16	Dnase1	-0.196395	1.84187	3.39175	0.0783161	0.147331
	ENSMUSG00000005981.12	Trap1	0.0880368	6.01737	3.95405	0.0586537	0.11634
	ENSMUSG00000005982.15	Naa60	0.26617	6.30738	49.1899	3.56901e-07	5.99369e-06
	ENSMUSG00000005983.16	1700037C18Rik	0.191823	2.60807	3.0054	0.0962302	0.173561
	ENSMUSG00000005986.17	Ankrd13d	0.00966232	2.32908	0.0060203	0.938818	0.96035
	ENSMUSG00000006005.19	Tpr	-0.0745814	7.01062	4.25518	0.0504721	0.103054
	ENSMUSG00000006010.15	Odr4	-0.0502979	5.54611	1.16786	0.290924	0.409841
	ENSMUSG00000006014.17	Prg4	2.46569	2.07566	14.0341	0.00103944	0.00419691
	ENSMUSG00000006019.16	Dhx34	-0.0103475	4.46254	0.0226707	0.881615	0.921235
	ENSMUSG00000006021.6	Kptn	0.114528	3.82783	4.00709	0.0571097	0.113877
	ENSMUSG00000006024.14	Napa	0.186802	6.58317	22.475	8.65415e-05	0.00053404
	ENSMUSG00000006050.13	Sra1	0.0790557	5.14862	2.47705	0.129029	0.219183
	ENSMUSG00000006056.14	Calcoco2	-0.276681	-0.0513118	0.838217	0.369305	0.492567
	ENSMUSG00000006057.16	Atp5g1	0.240655	5.54122	8.9184	0.00654886	0.0192136
	ENSMUSG00000006058.11	Snf8	0.135358	5.01606	10.1393	0.00409439	0.0130869
	ENSMUSG00000006095.13	Tbcb	0.161102	5.04306	10.3453	0.00379041	0.012275
	ENSMUSG00000006127.10	Inpp5k	-0.154631	6.93218	11.121	0.00284896	0.00965094
	ENSMUSG00000006134.5	Crkl	-0.136988	6.18752	12.425	0.0017928	0.00657318
	ENSMUSG00000006154.14	Eps8l1	-0.231731	5.61975	3.60158	0.0702094	0.13471
	ENSMUSG00000006169.21	Clint1	0.0936088	6.79309	5.85625	0.0237319	0.0560028
	ENSMUSG00000006191.18	Cdkal1	-0.104807	3.69746	2.24546	0.147462	0.243429
	ENSMUSG00000006205.14	Htra1	0.200046	5.8086	10.2608	0.00391195	0.0125926
	ENSMUSG00000006215.13	Zbtb17	0.233814	4.56978	14.1264	0.00100825	0.0040949
	ENSMUSG00000006218.5	Fam131c	-0.153631	0.157565	0.440319	0.513494	0.629425
	ENSMUSG00000006219.13	Fblim1	0.52839	6.45271	58.8233	8.15962e-08	1.91105e-06
	ENSMUSG00000006221.8	Hspb7	0.166606	5.21384	0.474685	0.497658	0.61494
	ENSMUSG00000006235.7	Epor	-0.420594	2.41919	18.8017	0.000238612	0.00124847
	ENSMUSG00000006241.17	Ccdc159	-0.847613	2.15485	50.6382	2.82362e-07	5.03488e-06
	ENSMUSG00000006262.16	Mob1b	-0.0540939	5.49453	0.368988	0.549444	0.661357
	ENSMUSG00000006269.8	Atp6v1b1	0.055798	2.67601	0.0849421	0.773293	0.843368
	ENSMUSG00000006273.15	Atp6v1b2	0.122691	7.12297	11.3503	0.00262224	0.00898943
	ENSMUSG00000006276.11	Eps15l1	0.0604465	6.12741	3.08568	0.0921482	0.16769
	ENSMUSG00000006281.9	Tep1	-0.441907	5.34928	70.1855	1.76958e-08	5.86685e-07
	ENSMUSG00000006288.9	Ttc5	-0.203544	5.22187	17.9251	0.000308316	0.00154061
	ENSMUSG00000006289.15	Osgep	0.036766	5.04461	0.60862	0.443177	0.564665
	ENSMUSG00000006299.14	Aamp	0.258494	6.91587	35.1346	4.62265e-06	4.85044e-05
	ENSMUSG00000006301.18	Tmbim1	0.0379468	7.91447	0.843125	0.367932	0.490961
	ENSMUSG00000006304.15	Arpc2	0.120328	7.67464	13.5008	0.00124147	0.00486518
	ENSMUSG00000006307.17	Kmt2b	-0.428888	6.73024	133.633	4.04235e-11	6.97966e-09
	ENSMUSG00000006310.11	Zbtb32	1.16344	1.92565	47.8631	4.44218e-07	7.12014e-06
	ENSMUSG00000006313.6	Upk1a	-0.0535671	0.859175	0.0716515	0.791307	0.857011
	ENSMUSG00000006315.10	Tmem147	0.218763	4.9115	13.1872	0.00138007	0.00530579
	ENSMUSG00000006333.15	Rps9	0.0994708	8.7263	5.11448	0.0333793	0.0739084
	ENSMUSG00000006335.17	Tfpt	-0.0044127	3.45343	0.00446066	0.957431	0.972891
	ENSMUSG00000006342.16	Susd2	0.113686	4.20839	1.59231	0.219509	0.330885
	ENSMUSG00000006344.18	Ggt5	0.307665	4.20036	13.0081	0.00146672	0.00557136
	ENSMUSG00000006345.11	Ggt1	0.987891	1.33453	14.4856	0.000896317	0.00371898
	ENSMUSG00000006356.11	Crip2	0.256338	8.95869	20.0049	0.000169427	0.000939771
	ENSMUSG00000006360.12	Crip1	0.255459	6.74876	14.6588	0.000847249	0.00354831
	ENSMUSG00000006362.17	Cbfa2t3	0.102087	7.04207	1.93137	0.177773	0.281272
	ENSMUSG00000006369.15	Fbln1	0.61853	6.76464	124.135	8.39784e-11	1.1623e-08
	ENSMUSG00000006373.11	Pgrmc1	-0.0725221	7.68541	1.7914	0.193697	0.301006
	ENSMUSG00000006378.16	ENSMUSG00000006378.16	0.327799	2.81546	7.80628	0.0102485	0.02783
	ENSMUSG00000006386.16	Tek	-0.535058	8.43189	77.7868	7.04946e-09	2.8926e-07
	ENSMUSG00000006389.14	Mpl	-0.0341507	0.235788	0.00956635	0.922923	0.949269
	ENSMUSG00000006390.16	Elovl1	0.0276802	8.72202	0.232196	0.634405	0.734085
	ENSMUSG00000006392.17	Med8	0.101644	5.41086	5.60655	0.0265798	0.0614918
	ENSMUSG00000006395.18	Hyi	-0.08234	4.18992	1.92493	0.178469	0.282041
	ENSMUSG00000006398.16	Cdc20	1.13363	2.88249	26.0915	3.46061e-05	0.000248352
	ENSMUSG00000006403.14	Adamts4	-0.0439247	1.36925	0.0234964	0.879496	0.920033
	ENSMUSG00000006411.13	Nectin4	0.033411	4.55782	0.267561	0.609859	0.71378
	ENSMUSG00000006412.11	Pfdn2	0.0684506	5.07998	2.73096	0.111862	0.195506
	ENSMUSG00000006418.18	Rnf114	0.217101	7.10733	12.406	0.00180473	0.00660913
	ENSMUSG00000006423.16	Steep1	-0.0996819	5.82472	2.40814	0.134212	0.226094
	ENSMUSG00000006435.17	Neurl1a	0.228079	3.19146	3.66113	0.0680865	0.131243
	ENSMUSG00000006442.11	Srm	0.571651	3.81048	37.5295	2.86409e-06	3.23961e-05
	ENSMUSG00000006445.4	Epha2	0.369405	6.5213	47.3841	4.81233e-07	7.60165e-06
	ENSMUSG00000006456.11	Rbm14	0.373147	5.29173	26.3108	3.28106e-05	0.000237322
	ENSMUSG00000006462.8	A530013C23Rik	-0.14464	-0.174958	0.237153	0.630829	0.731316
	ENSMUSG00000006463.14	Zdhhc24	-0.0249103	4.19021	0.142366	0.709362	0.794717
	ENSMUSG00000006464.10	Bbs1	-0.391911	4.21186	31.8271	9.27021e-06	8.50556e-05
	ENSMUSG00000006471.19	ENSMUSG00000006471.19	-0.403249	5.27764	33.9589	5.89148e-06	5.89114e-05
	ENSMUSG00000006476.20	Nsmf	0.246271	6.04325	26.2485	3.33104e-05	0.000240439
	ENSMUSG00000006494.12	Pdk1	-0.300261	5.26904	17.1253	0.000391592	0.00188385
	ENSMUSG00000006498.17	Ptbp1	0.238678	7.99517	37.7029	2.76863e-06	3.15364e-05
	ENSMUSG00000006517.6	Mvd	0.259853	3.71988	6.09617	0.0213122	0.0511862
	ENSMUSG00000006519.12	Cyba	0.281342	6.15113	21.1157	0.000124629	0.000723984
	ENSMUSG00000006522.18	Itih3	-0.0475335	1.36259	0.0601029	0.808484	0.87005
	ENSMUSG00000006526.14	Stimate	0.132246	5.60608	6.36329	0.0189356	0.0464246
	ENSMUSG00000006527.17	Sfmbt1	-0.139568	4.29179	3.839	0.0621693	0.121981
	ENSMUSG00000006529.17	Itih1	0.34137	1.29117	7.50268	0.0116236	0.0309283
	ENSMUSG00000006542.14	Prkag3	-0.277601	2.7995	5.83275	0.0239849	0.0564775
	ENSMUSG00000006567.12	Atp7b	-0.163518	5.95632	6.11423	0.0211415	0.0508323
	ENSMUSG00000006574.16	Slc4a1	-1.71059	0.866969	30.0665	1.36701e-05	0.000116744
	ENSMUSG00000006575.15	Rundc3a	0.696484	1.12896	16.248	0.00051212	0.00234099
	ENSMUSG00000006576.17	Slc4a3	-0.0990815	4.94527	2.08434	0.162156	0.262202
	ENSMUSG00000006585.4	Cdt1	0.700339	3.04106	41.8383	1.26896e-06	1.67266e-05
	ENSMUSG00000006586.16	Runx1t1	-0.746474	2.90526	51.2783	2.54975e-07	4.69537e-06
	ENSMUSG00000006587.7	Snai3	0.765631	-0.302741	8.92605	0.00652916	0.0191622
	ENSMUSG00000006589.9	Aprt	0.243274	4.8471	19.1527	0.000215692	0.00114539
	ENSMUSG00000006599.14	Gtf2h1	0.0732198	5.00556	2.24548	0.147461	0.243429
	ENSMUSG00000006611.16	Hfe	-0.180157	5.80491	24.7387	4.83409e-05	0.00032879
	ENSMUSG00000006638.17	Abhd1	0.164264	1.235	1.2069	0.283194	0.401187
	ENSMUSG00000006641.13	Slc5a6	0.0514799	3.25667	0.155558	0.696873	0.78501
	ENSMUSG00000006642.4	Tcf23	-0.219648	2.36439	1.03518	0.319415	0.440199
	ENSMUSG00000006649.18	Nphs1	0.112292	4.97417	2.91324	0.101177	0.180727
	ENSMUSG00000006651.9	Aplp1	0.295371	3.1532	10.1351	0.00410083	0.0131003
	ENSMUSG00000006673.15	Qrich1	0.112721	6.37122	17.3889	0.000361705	0.00176343
	ENSMUSG00000006675.11	P4htm	-0.0678036	3.71572	0.967243	0.335492	0.457261
	ENSMUSG00000006676.18	Usp19	-0.011988	7.52443	0.152417	0.69979	0.787368
	ENSMUSG00000006678.7	Pola1	0.15018	2.90708	1.75728	0.197842	0.305828
	ENSMUSG00000006699.18	Cdc42	0.137403	8.58097	11.2833	0.00268632	0.00917126
	ENSMUSG00000006705.14	Pknox1	0.0152037	5.06259	0.0763017	0.784814	0.852202
	ENSMUSG00000006711.16	D130043K22Rik	-0.869896	1.61806	23.1458	7.2596e-05	0.000461905
	ENSMUSG00000006715.12	Gmnn	0.0198665	2.82007	0.042795	0.837913	0.891324
	ENSMUSG00000006717.8	Acot13	-0.242411	4.43103	7.1052	0.0137414	0.0355755
	ENSMUSG00000006720.17	Zfp184	-0.238191	1.54618	3.23192	0.0852154	0.157523
	ENSMUSG00000006728.13	Cdk4	0.039151	6.60323	1.4491	0.240784	0.355459
	ENSMUSG00000006731.11	B4galnt1	0.514829	6.59357	69.5807	1.9102e-08	6.26166e-07
	ENSMUSG00000006732.15	Mettl1	-0.0336782	3.4594	0.139141	0.712516	0.796919
	ENSMUSG00000006736.10	Tspan31	0.169954	6.02293	16.6482	0.00045275	0.00211392
	ENSMUSG00000006740.15	Kif5b	-0.530403	6.87087	66.3712	2.89123e-08	8.64841e-07
	ENSMUSG00000006763.15	Saal1	-0.0998891	3.42557	2.0194	0.168573	0.269925
	ENSMUSG00000006777.8	Krt23	-0.138212	4.13	2.21126	0.150443	0.247413
	ENSMUSG00000006782.17	Cnp	0.0499444	6.04676	0.87187	0.360034	0.482708
	ENSMUSG00000006784.15	Odad4	-0.194457	3.80269	4.39323	0.0471593	0.0976504
	ENSMUSG00000006800.15	Sulf2	0.348384	5.82097	33.0819	7.08386e-06	6.83649e-05
	ENSMUSG00000006818.6	Sod2	0.013463	6.58348	0.0436415	0.836341	0.890087
	ENSMUSG00000006850.9	Tmco6	-0.128843	3.90406	3.65128	0.0684326	0.131796
	ENSMUSG00000006906.11	Stambp	-0.0448973	4.7503	0.714477	0.406576	0.529995
	ENSMUSG00000006920.15	Ezh1	-0.215285	6.67268	31.6434	9.64767e-06	8.76737e-05
	ENSMUSG00000006930.16	Hap1	0.157548	5.13937	2.23686	0.148204	0.244331
	ENSMUSG00000006931.16	P3h4	0.0613816	4.64866	0.736946	0.399404	0.522914
	ENSMUSG00000006932.18	Ctnnb1	0.157506	9.80844	11.0998	0.00287097	0.00971013
	ENSMUSG00000006941.6	Eif1b	0.118528	4.93518	6.35828	0.0189774	0.0465139
	ENSMUSG00000006958.15	Chrd	0.176979	2.09668	2.40049	0.134802	0.226935
	ENSMUSG00000006998.17	Psmd2	0.205925	7.29979	32.9156	7.33821e-06	7.02366e-05
	ENSMUSG00000007029.17	Vars	0.558511	6.4718	76.7835	7.92739e-09	3.17077e-07
	ENSMUSG00000007030.9	Vwa7	-0.0120594	2.66868	0.0115733	0.915252	0.944381
	ENSMUSG00000007033.5	Hspa1l	0.326225	1.56485	3.18479	0.0873818	0.160642
	ENSMUSG00000007034.16	Slc44a4	0.265944	3.959	18.7734	0.000240576	0.00125611
	ENSMUSG00000007035.16	Msh5	-0.184553	1.88144	1.51511	0.230668	0.343872
	ENSMUSG00000007036.16	Abhd16a	0.237471	6.14293	31.256	1.04997e-05	9.39e-05
	ENSMUSG00000007038.6	Neu1	0.151119	5.51397	11.372	0.00260184	0.00893002
	ENSMUSG00000007039.13	Ddah2	0.238825	5.75462	6.76715	0.0158812	0.0401381
	ENSMUSG00000007041.10	Clic1	0.242306	7.24621	34.7645	4.98667e-06	5.16098e-05
	ENSMUSG00000007050.18	Lsm2	0.371803	3.36813	26.1852	3.38262e-05	0.000243758
	ENSMUSG00000007080.15	Pole	0.589294	1.99717	12.0864	0.00201803	0.00725765
	ENSMUSG00000007097.15	Atp1a2	-0.271241	7.40397	9.58886	0.0050465	0.0155131
	ENSMUSG00000007122.12	Casq1	0.806632	0.270275	13.7895	0.00112724	0.00449998
	ENSMUSG00000007207.11	Stx1a	0.57813	2.88258	34.8256	4.92452e-06	5.10878e-05
	ENSMUSG00000007216.7	Zfp775	0.015178	3.22971	0.034964	0.853293	0.902564
	ENSMUSG00000007279.15	Scube2	-0.594078	5.92107	44.5927	7.76032e-07	1.12683e-05
	ENSMUSG00000007338.11	Mrpl49	0.026794	4.89365	0.218509	0.64453	0.743334
	ENSMUSG00000007379.16	Dennd2c	-0.478216	3.19642	14.8079	0.000807349	0.00340699
	ENSMUSG00000007411.17	Mark3	0.157289	5.99383	11.8721	0.00217648	0.00770517
	ENSMUSG00000007415.16	Gatad1	0.0120732	5.75567	0.0729628	0.789454	0.855696
	ENSMUSG00000007458.15	M6pr	0.0625984	7.72896	2.65434	0.116742	0.202265
	ENSMUSG00000007476.19	Lrrc8a	0.479479	6.24547	64.2449	3.83692e-08	1.06548e-06
	ENSMUSG00000007564.16	Ppp2r1a	0.22677	7.68999	41.9132	1.25175e-06	1.65482e-05
	ENSMUSG00000007570.17	Fance	-0.0288902	4.1669	0.209939	0.651069	0.748697
	ENSMUSG00000007589.10	Tinf2	-0.0724552	5.28848	2.29862	0.142967	0.237448
	ENSMUSG00000007591.16	Tssk4	-0.715237	0.112349	9.61921	0.0049881	0.0153812
	ENSMUSG00000007603.10	Dus3l	0.253274	5.58957	29.0401	1.72511e-05	0.000141241
	ENSMUSG00000007610.16	Gtpbp3	0.0674655	4.48613	1.04865	0.316355	0.437087
	ENSMUSG00000007613.16	Tgfbr1	-0.0144828	5.56785	0.0298516	0.864322	0.909954
	ENSMUSG00000007617.19	Homer1	0.245713	2.75601	3.27618	0.0832374	0.154653
	ENSMUSG00000007646.14	Rad51c	0.561305	0.972137	11.5001	0.00248479	0.00858699
	ENSMUSG00000007655.17	Cav1	-0.102594	10.2448	3.08136	0.0923624	0.167975
	ENSMUSG00000007656.14	Arpp19	-0.0139162	5.91631	0.0746124	0.787147	0.854045
	ENSMUSG00000007659.19	Bcl2l1	0.689537	7.20848	103.651	4.85033e-10	3.88004e-08
	ENSMUSG00000007670.11	Khsrp	0.431145	6.83997	113.155	2.07995e-10	2.15906e-08
	ENSMUSG00000007682.9	Dio2	0.703877	1.14908	9.09153	0.00611871	0.0181686
	ENSMUSG00000007721.7	Ccdc124	0.263092	4.8033	14.8045	0.000808229	0.00340946
	ENSMUSG00000007739.11	Cct4	0.186021	6.73798	15.4237	0.000663006	0.00288982
	ENSMUSG00000007777.10	0610009B22Rik	-0.0632573	3.08088	0.669708	0.421461	0.54379
	ENSMUSG00000007783.11	Cpt1c	0.284651	3.3885	11.2182	0.00275028	0.00936396
	ENSMUSG00000007805.5	Twist2	0.443074	0.985501	7.90922	0.00982387	0.0268936
	ENSMUSG00000007812.17	Zfp655	-0.0967304	5.1649	3.60789	0.069981	0.134346
	ENSMUSG00000007815.14	Rhoa	0.0146094	8.97388	0.0945153	0.76125	0.834094
	ENSMUSG00000007817.16	Zmiz1	-0.363005	7.80249	39.6627	1.90033e-06	2.31262e-05
	ENSMUSG00000007827.11	Ankrd26	-0.404681	3.06655	21.9556	9.93447e-05	0.000596992
	ENSMUSG00000007833.16	Aldh16a1	0.245279	4.94551	29.4247	1.58021e-05	0.000131225
	ENSMUSG00000007836.7	Hnrnpa0	0.34016	6.86024	34.0812	5.74327e-06	5.78607e-05
	ENSMUSG00000007837.12	Prrg2	0.109899	4.22871	2.67521	0.115388	0.200344
	ENSMUSG00000007850.17	Hnrnph1	-0.0703441	8.17299	2.28214	0.144343	0.239209
	ENSMUSG00000007867.10	Ift43	0.0342276	4.74965	0.303627	0.586874	0.694382
	ENSMUSG00000007872.4	Id3	0.124404	7.22789	2.86126	0.104098	0.184845
	ENSMUSG00000007877.3	Tcap	-0.236685	5.21145	0.901209	0.352221	0.475013
	ENSMUSG00000007880.17	Arid1a	-0.363591	7.63815	91.7041	1.54746e-09	9.24185e-08
	ENSMUSG00000007888.16	Crlf1	0.238183	4.33464	8.64949	0.00728441	0.0209694
	ENSMUSG00000007891.17	Ctsd	0.257271	9.42832	21.6935	0.000106577	0.000634984
	ENSMUSG00000007892.9	Rplp1	0.150209	8.81396	7.00759	0.0143245	0.0368228
	ENSMUSG00000007908.15	Hmgcll1	-0.0827783	3.62984	1.03229	0.320078	0.440904
	ENSMUSG00000007950.10	Abhd8	0.402795	4.52678	36.9827	3.18932e-06	3.56529e-05
	ENSMUSG00000007987.13	Ift22	0.144921	4.43182	7.51939	0.0115429	0.0307369
	ENSMUSG00000007989.8	Fzd3	0.146219	3.4935	2.50578	0.126937	0.216305
	ENSMUSG00000008035.13	Mid1ip1	0.266357	7.73834	19.6182	0.000188921	0.00102508
	ENSMUSG00000008036.12	Ap2s1	0.27563	5.55288	33.9968	5.84513e-06	5.8664e-05
	ENSMUSG00000008090.15	Fgfrl1	0.357006	4.84721	32.8713	7.40771e-06	7.07077e-05
	ENSMUSG00000008129.15	Brme1	-0.442272	0.10222	3.32987	0.0809082	0.151212
	ENSMUSG00000008136.15	Fhl2	0.320684	3.16809	2.41634	0.133582	0.225294
	ENSMUSG00000008140.19	Emc10	0.399422	6.42637	61.0197	5.97488e-08	1.51277e-06
	ENSMUSG00000008153.13	Clstn3	0.571428	1.742	1.9811	0.172503	0.274855
	ENSMUSG00000008167.15	Fbxw9	0.175874	4.30087	4.93794	0.0362769	0.0790494
	ENSMUSG00000008193.14	Spib	0.124935	4.45941	1.17345	0.289799	0.408653
	ENSMUSG00000008200.16	Fnbp4	-0.139767	6.54525	8.49785	0.00773896	0.0220531
	ENSMUSG00000008206.17	Cers4	-0.274229	6.39738	50.6232	2.83044e-07	5.04188e-06
	ENSMUSG00000008226.15	Scrn3	-0.127251	4.76913	6.14639	0.0208412	0.050231
	ENSMUSG00000008301.12	Phax	-0.139601	4.89542	6.82553	0.0154868	0.0393006
	ENSMUSG00000008305.19	Tle1	0.257214	5.81685	14.4059	0.000919909	0.0038069
	ENSMUSG00000008307.12	1700109H08Rik	-1.14747	0.528666	13.4827	0.00124906	0.00488943
	ENSMUSG00000008318.11	Relt	0.54509	3.0882	28.6813	1.87344e-05	0.000151676
	ENSMUSG00000008333.13	Snrpb2	-0.0546273	4.46791	0.633617	0.434084	0.556126
	ENSMUSG00000008348.10	Ubc	0.234115	8.17855	6.67872	0.0165002	0.0413726
	ENSMUSG00000008373.17	Prpf31	0.0269981	5.04764	0.286677	0.597442	0.703165
	ENSMUSG00000008384.9	Sertad1	0.314341	4.73072	17.227	0.000379757	0.00183704
	ENSMUSG00000008393.10	Carhsp1	0.237163	7.20763	21.1993	0.000121822	0.000710047
	ENSMUSG00000008398.17	Elk3	-0.104741	7.29508	3.12669	0.0901405	0.164689
	ENSMUSG00000008429.9	Herpud2	0.0736476	5.82555	4.19995	0.0518707	0.105465
	ENSMUSG00000008435.16	Rdh13	0.107251	4.13653	3.84546	0.0619656	0.121705
	ENSMUSG00000008450.9	Nutf2	0.0972529	4.49546	2.31522	0.141598	0.235532
	ENSMUSG00000008475.14	Arpc5	0.178634	7.31582	16.3232	0.000500335	0.00229856
	ENSMUSG00000008496.20	Pou2f2	-0.472762	4.54788	16.7945	0.00043295	0.00204551
	ENSMUSG00000008540.12	Mgst1	-0.149524	7.61668	2.88179	0.102933	0.183355
	ENSMUSG00000008575.18	Nfib	-0.225224	7.61818	20.516	0.000146947	0.000831745
	ENSMUSG00000008601.13	Rab25	0.0817806	4.68277	1.54004	0.226987	0.339343
	ENSMUSG00000008604.12	Ubqln4	0.245257	6.17612	34.1118	5.70684e-06	5.75916e-05
	ENSMUSG00000008658.17	Rbfox1	-0.901825	0.418847	6.84213	0.0153765	0.0390664
	ENSMUSG00000008668.16	Rps18	0.146624	8.25242	6.41217	0.0185334	0.0455729
	ENSMUSG00000008682.14	Rpl10	-0.0883817	9.22571	3.79293	0.0636435	0.124342
	ENSMUSG00000008683.17	Rps15a	0.0196301	7.43634	0.103902	0.750077	0.825743
	ENSMUSG00000008690.16	Ncaph2	0.148584	6.53488	17.3402	0.000367032	0.0017854
	ENSMUSG00000008730.18	Hipk1	-0.179357	7.6464	16.4592	0.000479796	0.00221647
	ENSMUSG00000008734.10	Gprc5b	0.010315	5.63419	0.0267005	0.871613	0.915005
	ENSMUSG00000008763.17	Man1a2	0.00502215	5.80141	0.010488	0.919309	0.946892
	ENSMUSG00000008822.16	Acyp1	-0.0159289	2.83044	0.0374576	0.870423	0.914141
	ENSMUSG00000008845.10	Cd163	0.248215	3.42192	3.45786	0.0756515	0.143323
	ENSMUSG00000008855.18	Hdac5	0.175909	7.10125	13.2425	0.00135444	0.00522916
	ENSMUSG00000008859.9	Rala	-0.0221308	5.92166	0.147539	0.704389	0.791025
	ENSMUSG00000008892.13	Vdac3	-0.00122372	6.1631	0.000838728	0.977143	0.985906
	ENSMUSG00000008958.15	Vps72	0.0731406	5.54843	4.42308	0.0464755	0.0965669
	ENSMUSG00000008976.17	Gabpa	-0.150671	5.46233	6.9486	0.0146902	0.0376081
	ENSMUSG00000008999.8	Bmp7	0.264076	2.41878	3.45891	0.0756101	0.14326
	ENSMUSG00000009013.6	Dynll1	0.190995	7.34021	10.8557	0.00313844	0.0104769
	ENSMUSG00000009030.15	Pdcl	-0.100184	5.1562	2.46009	0.130281	0.220859
	ENSMUSG00000009035.16	Tmem184b	0.434393	7.72736	64.18	3.87062e-08	1.07313e-06
	ENSMUSG00000009070.15	Rsph14	0.209913	2.00501	1.73373	0.200767	0.308964
	ENSMUSG00000009073.17	Nf2	0.048872	7.08736	1.84077	0.187888	0.293968
	ENSMUSG00000009076.11	Zmat5	0.0216471	4.00555	0.12708	0.724693	0.806093
	ENSMUSG00000009079.17	Ewsr1	0.0596727	7.87895	3.42114	0.0771185	0.145454
	ENSMUSG00000009090.18	Ap1b1	0.223775	6.40299	35.5975	4.20751e-06	4.47407e-05
	ENSMUSG00000009092.6	Derl3	-0.187658	0.991011	1.38599	0.250995	0.366592
	ENSMUSG00000009097.11	Tbx1	0.303365	3.8062	10.1291	0.00411016	0.0131253
	ENSMUSG00000009112.5	Bcl2l13	-0.0023509	5.52512	0.00247873	0.960717	0.974577
	ENSMUSG00000009114.18	2610028H24Rik	0.28054	5.21804	8.02143	0.00938289	0.0258769
	ENSMUSG00000009145.7	Dqx1	-0.124579	3.15557	1.52176	0.229678	0.342687
	ENSMUSG00000009185.3	Ccl8	1.61794	2.16973	25.8423	3.67765e-05	0.000261347
	ENSMUSG00000009207.16	Lnpk	0.0731885	2.71547	0.398955	0.533791	0.648901
	ENSMUSG00000009210.11	Prr29	0.277163	2.60558	5.09429	0.0336973	0.0744705
	ENSMUSG00000009281.7	Rarres2	0.00580138	7.0829	0.0105279	0.919156	0.94679
	ENSMUSG00000009291.14	Pttg1ip	0.19162	8.05618	35.0237	4.72867e-06	4.94386e-05
	ENSMUSG00000009292.19	Trpm2	-0.658861	2.57747	23.9027	5.97311e-05	0.000392484
	ENSMUSG00000009293.18	Ube2g2	0.482895	5.90099	116.379	1.58197e-10	1.80313e-08
	ENSMUSG00000009376.16	Met	-0.117179	5.7943	3.82313	0.0626728	0.122803
	ENSMUSG00000009378.5	Slc16a12	-0.29797	3.0195	7.63756	0.0109891	0.0295055
	ENSMUSG00000009394.14	Syn2	0.365854	3.73494	9.00239	0.00633617	0.0186839
	ENSMUSG00000009406.14	Elk1	0.0672803	4.21454	0.716068	0.406062	0.529602
	ENSMUSG00000009418.17	Nav1	-0.398996	6.54486	45.2588	6.9115e-07	1.0223e-05
	ENSMUSG00000009470.18	Tnpo1	0.0569994	6.05959	0.449542	0.509158	0.625337
	ENSMUSG00000009535.14	Rnmt	0.0362152	4.39391	0.420502	0.52304	0.638612
	ENSMUSG00000009545.15	Kcnq1	0.181274	5.11081	8.50067	0.00773024	0.0220346
	ENSMUSG00000009549.15	Srp14	0.030739	5.87339	0.50753	0.483298	0.602429
	ENSMUSG00000009555.17	Cdk9	0.183602	6.3164	24.4149	5.24438e-05	0.000351216
	ENSMUSG00000009563.17	Tor2a	0.233475	4.88623	20.1827	0.00016121	0.000900203
	ENSMUSG00000009566.13	Fpgs	0.345958	4.37289	26.9607	2.80599e-05	0.000209835
	ENSMUSG00000009569.15	Mrtfb	-0.480123	6.15431	78.7604	6.29764e-09	2.63368e-07
	ENSMUSG00000009575.15	Cbx5	-0.023037	6.83836	0.401755	0.532371	0.647601
	ENSMUSG00000009585.19	Apobec3	0.0823624	6.5123	0.844541	0.367537	0.490471
	ENSMUSG00000009614.17	Sardh	0.336086	4.10597	26.1572	3.40575e-05	0.000245324
	ENSMUSG00000009621.19	Vav2	0.071355	5.88678	1.63483	0.213652	0.324232
	ENSMUSG00000009628.15	Tex15	0.192156	3.04671	2.46488	0.129927	0.220343
	ENSMUSG00000009630.11	Ppp2cb	0.122823	6.33885	8.51286	0.00769262	0.0219597
	ENSMUSG00000009633.4	G0s2	-0.28302	5.99249	1.30221	0.265427	0.381756
	ENSMUSG00000009640.12	Dmap1	-0.0289965	4.43568	0.226522	0.638556	0.737958
	ENSMUSG00000009647.14	Mcu	0.0974445	4.91769	4.97848	0.0355874	0.0777997
	ENSMUSG00000009654.5	Oit3	-0.0896576	0.300609	0.163889	0.689302	0.779201
	ENSMUSG00000009670.12	Tex11	-0.0130483	1.31417	0.00507686	0.943806	0.963808
	ENSMUSG00000009681.11	Bcr	-0.0585478	6.70451	1.91362	0.179701	0.283705
	ENSMUSG00000009687.15	Fxyd5	0.266088	6.42056	15.4474	0.000658043	0.00287249
	ENSMUSG00000009731.5	Kcnd1	0.382789	0.892306	2.67638	0.115313	0.200294
	ENSMUSG00000009733.10	Tfcp2	-0.077227	4.15342	2.27848	0.14465	0.239567
	ENSMUSG00000009739.18	Pou6f1	-0.252886	5.90418	21.2546	0.000120004	0.000700977
	ENSMUSG00000009741.16	Ubp1	-0.0103601	6.67673	0.0788312	0.781371	0.848834
	ENSMUSG00000009772.16	Nuak2	0.0201694	4.53824	0.0728661	0.78959	0.85579
	ENSMUSG00000009828.16	Cilk1	-0.126147	5.81084	11.0237	0.0029516	0.00995224
	ENSMUSG00000009863.15	Sdhb	-0.0170806	6.03459	0.0654252	0.800367	0.863606
	ENSMUSG00000009876.14	Cox4i2	0.054841	5.37959	0.582977	0.452826	0.573481
	ENSMUSG00000009894.16	Snap47	-0.022563	5.27879	0.151171	0.700956	0.78819
	ENSMUSG00000009900.8	Wnt3a	0.0253654	4.42487	0.107879	0.745511	0.822378
	ENSMUSG00000009905.6	Kdsr	-0.155711	5.31008	4.59163	0.0428188	0.0903872
	ENSMUSG00000009907.18	Vps4b	-0.042749	6.36667	0.504952	0.484399	0.603389
	ENSMUSG00000009927.10	Rps25	-0.206151	8.04345	13.1637	0.00139111	0.00534117
	ENSMUSG00000009995.18	Tafazzin	-0.0515065	6.26822	2.00777	0.169756	0.271323
	ENSMUSG00000010021.14	Kif19a	0.00247705	4.01159	0.000430488	0.983624	0.989696
	ENSMUSG00000010025.20	Aldh3a2	0.0521969	7.06808	1.96673	0.174006	0.276517
	ENSMUSG00000010044.13	Zmynd10	0.267524	3.95725	6.88141	0.0151193	0.0384969
	ENSMUSG00000010045.3	Tmem115	0.282636	5.60269	28.1166	2.13568e-05	0.000168908
	ENSMUSG00000010047.13	Hyal2	0.405818	6.65347	34.9728	4.77815e-06	4.98362e-05
	ENSMUSG00000010048.11	Ifrd2	0.222555	4.20209	19.6727	0.000186031	0.00101585
	ENSMUSG00000010051.16	Hyal1	-0.831072	5.42799	84.4177	3.33919e-09	1.5954e-07
	ENSMUSG00000010054.5	Tusc2	0.0955636	5.00599	4.6318	0.0419958	0.0889871
	ENSMUSG00000010057.9	Nprl2	0.109884	3.89011	3.02126	0.0954075	0.172416
	ENSMUSG00000010066.16	Cacna2d2	-0.596182	0.0485848	0.915569	0.348485	0.47101
	ENSMUSG00000010067.14	Rassf1	0.217813	5.94407	31.2323	1.05545e-05	9.41964e-05
	ENSMUSG00000010080.16	Epn3	0.265255	6.30447	20.7158	0.000139061	0.00079355
	ENSMUSG00000010086.18	Rnf112	0.263047	-0.453469	1.14352	0.295885	0.415349
	ENSMUSG00000010095.14	Slc3a2	0.165406	7.78366	4.86886	0.0374867	0.0810177
	ENSMUSG00000010097.16	Nxf1	0.00692389	7.39871	0.0372903	0.848552	0.89924
	ENSMUSG00000010110.18	Stx5a	0.104981	6.63301	6.23105	0.0200732	0.0487815
	ENSMUSG00000010122.15	Slc47a1	-0.289932	2.04608	3.79197	0.0636749	0.12439
	ENSMUSG00000010136.15	Pifo	0.133179	3.18159	0.965363	0.335953	0.457603
	ENSMUSG00000010142.13	Tnfrsf13b	-0.0908605	3.62783	0.495949	0.488279	0.606878
	ENSMUSG00000010154.8	Spire2	0.0846649	2.42824	0.308282	0.584039	0.691914
	ENSMUSG00000010175.14	Prox1	-0.309721	1.88815	4.34253	0.0483467	0.0996231
	ENSMUSG00000010205.12	Raver1	0.417336	6.45683	154.307	9.4979e-12	2.75593e-09
	ENSMUSG00000010277.8	Bltp2	-0.302323	7.62393	47.8283	4.46799e-07	7.15494e-06
	ENSMUSG00000010290.8	AI597479	-0.0994333	4.9348	4.14458	0.0533169	0.107915
	ENSMUSG00000010307.8	Tmem86a	-0.013994	4.29381	0.0311224	0.861495	0.907936
	ENSMUSG00000010311.16	Optc	0.955745	-0.174436	17.2122	0.00038145	0.00184269
	ENSMUSG00000010342.17	Tex14	-0.319297	-0.25961	1.38515	0.251134	0.366702
	ENSMUSG00000010358.14	Ifi35	0.126148	6.25723	2.18252	0.153003	0.250669
	ENSMUSG00000010362.10	Rdm1	-0.00965765	4.24674	0.0235255	0.879422	0.920033
	ENSMUSG00000010376.16	Nedd8	0.178733	5.78527	17.9524	0.000305831	0.00153038
	ENSMUSG00000010392.9	Gosr1	-0.16347	5.86617	16.044	0.000545608	0.00246116
	ENSMUSG00000010406.13	Mrpl52	-0.148664	4.60222	5.53567	0.0274562	0.0631258
	ENSMUSG00000010453.13	Kansl3	-0.0747022	6.57995	2.80085	0.107617	0.18976
	ENSMUSG00000010492.11	Uckl1os	-0.0581721	3.52382	0.272738	0.606442	0.710605
	ENSMUSG00000010517.8	Faf1	0.0107436	5.15029	0.0412978	0.840732	0.893642
	ENSMUSG00000010538.15	Tsacc	0.0618527	-0.220076	0.0717517	0.791165	0.857011
	ENSMUSG00000010554.15	Mettl16	0.0999739	4.68035	3.10388	0.0912509	0.166455
	ENSMUSG00000010601.15	Apol7a	0.61583	0.31377	4.79209	0.0388846	0.0835417
	ENSMUSG00000010607.9	Pigyl	0.0142067	3.92662	0.0538171	0.818579	0.87734
	ENSMUSG00000010608.16	Rbm25	-0.469221	6.80682	85.7129	2.90152e-09	1.43341e-07
	ENSMUSG00000010609.16	Psen2	0.0269068	5.05852	0.172474	0.68173	0.772997
	ENSMUSG00000010651.5	Acaa1b	0.387323	2.6824	4.36053	0.0479211	0.0989122
	ENSMUSG00000010660.4	Plcd1	0.0344211	4.18453	0.295403	0.591952	0.69851
	ENSMUSG00000010663.6	Fads1	0.0944489	7.50617	5.4466	0.0286037	0.0652132
	ENSMUSG00000010721.16	Lmbr1	-0.105927	4.28805	3.23873	0.0849075	0.157104
	ENSMUSG00000010751.16	Tnfrsf22	0.0223987	3.33895	0.065998	0.799515	0.86306
	ENSMUSG00000010755.18	Cars	0.10454	4.66743	2.79476	0.107979	0.190244
	ENSMUSG00000010760.6	Phlda2	-0.0148546	-0.316116	0.00337075	0.997123	0.998096
	ENSMUSG00000010797.7	Wnt2	-0.0230772	4.54098	0.0496845	0.82556	0.882436
	ENSMUSG00000010830.9	Kdelr3	0.627338	3.72586	18.2193	0.00028272	0.00143617
	ENSMUSG00000010911.13	Apip	0.00424615	3.69189	0.00401741	0.950003	0.967648
	ENSMUSG00000010914.11	Pdhx	0.0237614	4.18492	0.182986	0.672756	0.765609
	ENSMUSG00000010936.12	Vac14	0.166138	5.10808	9.08859	0.00612575	0.0181802
	ENSMUSG00000011008.14	Mcoln2	-0.0566701	1.15248	0.0653329	0.800505	0.863648
	ENSMUSG00000011034.7	Slc5a1	0.196926	2.42306	1.27125	0.271033	0.388121
	ENSMUSG00000011096.18	Akt1s1	0.192064	5.28297	13.2594	0.00134671	0.00520161
	ENSMUSG00000011114.19	Tbrg1	0.105668	6.54974	3.71636	0.0661831	0.12817
	ENSMUSG00000011148.15	Adssl1	0.264891	4.19901	19.5971	0.000190053	0.00103026
	ENSMUSG00000011154.18	Cfap161	-0.0117484	3.53534	0.00892276	0.925553	0.951469
	ENSMUSG00000011158.9	Brf1	-0.251768	5.51935	30.1739	1.33449e-05	0.000114641
	ENSMUSG00000011171.12	Vipr2	-0.103173	5.23567	1.19063	0.28638	0.405043
	ENSMUSG00000011179.9	Odc1	0.0731564	6.48355	0.886109	0.356212	0.478584
	ENSMUSG00000011254.17	Thg1l	0.152774	2.79065	3.00732	0.09613	0.173434
	ENSMUSG00000011256.17	Adam19	0.00731895	6.53449	0.0137444	0.907679	0.939806
	ENSMUSG00000011257.20	Pabpc4	0.233631	5.0842	16.5098	0.000472381	0.00219034
	ENSMUSG00000011263.17	Exoc3l2	0.00080518	1.78157	2.37311e-05	0.996155	0.997528
	ENSMUSG00000011267.9	Zfp296	0.184582	1.4114	0.836902	0.369675	0.492871
	ENSMUSG00000011305.12	Plin5	-0.122445	2.26612	0.318076	0.578166	0.68682
	ENSMUSG00000011306.8	Sugp1	0.0155208	5.24482	0.112315	0.740529	0.818649
	ENSMUSG00000011382.9	Dhdh	-0.26445	5.02343	8.82724	0.00678865	0.0198071
	ENSMUSG00000011427.17	Zfp790	-0.275715	4.20076	21.7093	0.000106124	0.000632499
	ENSMUSG00000011463.6	Cpb1	0.0651713	0.391389	0.0949692	0.760696	0.833644
	ENSMUSG00000011658.17	Fuz	0.12138	5.03392	6.6877	0.0164361	0.0412594
	ENSMUSG00000011752.8	Pgam1	0.276419	6.74477	32.3719	8.24191e-06	7.71501e-05
	ENSMUSG00000011831.17	Evi5	-0.244453	5.60737	16.6848	0.000447696	0.0020965
	ENSMUSG00000011832.17	Evi5l	-0.126603	4.82503	5.83819	0.0239261	0.0563848
	ENSMUSG00000011837.5	Snapc2	0.246247	4.21855	18.2646	0.000278984	0.00142155
	ENSMUSG00000011877.14	Git1	0.416383	7.04293	54.7356	1.4917e-07	3.04255e-06
	ENSMUSG00000011884.14	Gltp	0.112067	7.07729	6.14044	0.0208964	0.0503331
	ENSMUSG00000011958.18	Bnip2	0.0484752	7.00944	1.31711	0.262783	0.379066
	ENSMUSG00000011960.13	Ccnt1	-0.242205	5.41269	10.2224	0.0039686	0.0127432
	ENSMUSG00000012017.5	Scarf2	0.52439	7.29538	41.2983	1.4009e-06	1.80697e-05
	ENSMUSG00000012076.9	Brms1l	0.0466765	4.71899	0.92639	0.345706	0.468218
	ENSMUSG00000012114.18	Med15	0.34766	6.35835	61.4302	5.64202e-08	1.44481e-06
	ENSMUSG00000012117.14	Dhdds	0.0709415	5.67659	3.83633	0.0622537	0.12212
	ENSMUSG00000012123.18	Crybg2	-0.30547	3.44238	10.7382	0.00327679	0.0108659
	ENSMUSG00000012126.17	Ubxn11	0.102658	4.22436	0.850419	0.365904	0.488891
	ENSMUSG00000012296.17	Tjap1	0.471708	5.0343	71.617	1.47954e-08	5.08909e-07
	ENSMUSG00000012350.16	Ehf	-0.378251	5.38661	33.4472	6.55799e-06	6.44165e-05
	ENSMUSG00000012405.17	Rpl15	0.0594154	7.83516	3.0113	0.095923	0.173186
	ENSMUSG00000012422.15	Tmem167	0.136277	4.97613	2.75832	0.110177	0.193297
	ENSMUSG00000012428.10	Steap4	0.288236	4.73768	3.86252	0.0614314	0.120887
	ENSMUSG00000012429.10	Mplkip	0.00714523	3.86948	0.00635877	0.937125	0.95935
	ENSMUSG00000012443.5	Kif11	1.41348	2.78947	56.557	1.13565e-07	2.48621e-06
	ENSMUSG00000012483.5	Rpa3	-0.281933	2.5806	10.991	0.00298698	0.0100533
	ENSMUSG00000012519.15	Mlkl	0.00841051	3.52833	0.00333789	0.954422	0.970675
	ENSMUSG00000012535.15	Tnpo3	-0.0986317	6.16686	6.98256	0.0144785	0.0371527
	ENSMUSG00000012609.20	Ttll5	-0.187658	4.1608	9.60522	0.00501494	0.0154433
	ENSMUSG00000012640.17	Zfp715	-0.275961	5.21107	22.7063	8.1429e-05	0.000508429
	ENSMUSG00000012705.17	Retn	0.35548	3.37103	0.322298	0.575672	0.684704
	ENSMUSG00000012819.17	Cdh23	-0.284119	-0.0306251	0.89194	0.354663	0.477147
	ENSMUSG00000012848.16	Rps5	0.270049	8.32344	17.6864	0.000330937	0.00163815
	ENSMUSG00000012889.9	Podnl1	0.659965	1.74604	15.3013	0.000689281	0.00298643
	ENSMUSG00000013033.17	Adgrl1	-0.267098	6.8146	26.3151	3.27769e-05	0.000237258
	ENSMUSG00000013076.18	Amotl1	-0.489661	7.09188	58.7982	8.18907e-08	1.91433e-06
	ENSMUSG00000013089.16	Etv5	-0.200489	7.67103	8.02702	0.00936154	0.0258398
	ENSMUSG00000013150.16	Gfod2	0.22532	4.40354	11.6575	0.00234886	0.00820055
	ENSMUSG00000013155.11	Enkd1	0.335396	2.79284	10.5516	0.00351051	0.0115161
	ENSMUSG00000013160.8	Atp6v0d1	0.214758	6.59799	32.8065	7.51055e-06	7.14938e-05
	ENSMUSG00000013236.18	Ptprs	-0.15592	6.59824	8.66072	0.00725195	0.0208971
	ENSMUSG00000013275.10	Slc41a1	-0.081715	5.95819	2.50737	0.126823	0.216131
	ENSMUSG00000013338.17	Fer1l4	-0.482418	1.19372	6.48111	0.0179821	0.0443863
	ENSMUSG00000013367.6	Iglon5	0.679888	-0.166202	9.68075	0.00487197	0.0151017
	ENSMUSG00000013415.10	Igf2bp1	-0.451145	1.57045	7.68014	0.0107968	0.0290698
	ENSMUSG00000013419.8	Zfp651	0.280864	5.2891	15.9498	0.000561877	0.00252151
	ENSMUSG00000013465.20	Nelfb	0.198608	6.42392	23.1609	7.23116e-05	0.00046057
	ENSMUSG00000013495.16	Tmem175	0.145517	4.97183	7.20177	0.0131902	0.0343731
	ENSMUSG00000013523.14	Bcas1	0.0721523	2.8857	0.673446	0.420187	0.542587
	ENSMUSG00000013539.15	Tango2	0.147503	4.32415	5.53829	0.0274233	0.063078
	ENSMUSG00000013584.6	Aldh1a2	-0.0802423	4.93228	0.42449	0.521093	0.63686
	ENSMUSG00000013593.13	Ndufs2	0.0738593	6.6759	1.86887	0.184677	0.28983
	ENSMUSG00000013622.16	Atraid	0.0231394	5.84434	0.361332	0.553583	0.665129
	ENSMUSG00000013629.17	Cad	-0.328635	5.04502	35.1312	4.62588e-06	4.85092e-05
	ENSMUSG00000013646.18	Sh3bp5l	0.177871	5.50324	12.7126	0.00162304	0.00605954
	ENSMUSG00000013662.7	Atad1	-0.0555098	6.05512	1.39218	0.249969	0.365307
	ENSMUSG00000013663.8	ENSMUSG00000013663.8	0.102472	6.93495	1.2293	0.278879	0.396881
	ENSMUSG00000013698.13	Pea15a	-0.0105019	8.05388	0.0459856	0.832072	0.887601
	ENSMUSG00000013701.14	Timm23	0.307854	5.33349	55.1753	1.39585e-07	2.88073e-06
	ENSMUSG00000013707.4	Tnfaip8l2	0.372641	3.58472	9.19212	0.00588312	0.017613
	ENSMUSG00000013736.17	Trnt1	-0.000403855	4.59831	3.95349e-05	0.995037	0.996748
	ENSMUSG00000013766.12	Ly6g6e	0.209261	0.521489	1.24619	0.275685	0.393459
	ENSMUSG00000013787.16	Ehmt2	0.297766	7.04504	58.8195	8.16408e-08	1.91105e-06
	ENSMUSG00000013822.8	Elof1	0.208458	6.06851	12.037	0.00205341	0.00736668
	ENSMUSG00000013833.16	Med16	0.292984	5.50467	42.016	1.22854e-06	1.62924e-05
	ENSMUSG00000013846.11	St3gal1	0.0135483	7.89635	0.140443	0.711237	0.796241
	ENSMUSG00000013858.15	Tmem259	0.392078	7.02377	77.7953	7.04246e-09	2.8926e-07
	ENSMUSG00000013878.19	Rnf170	-0.0642418	4.36918	0.801374	0.379857	0.503598
	ENSMUSG00000013921.16	Clip3	0.47291	3.26974	26.5326	3.10978e-05	0.000227768
	ENSMUSG00000013973.13	Dedd	0.102413	4.97034	6.06676	0.0215935	0.0517408
	ENSMUSG00000013974.4	Mcemp1	0.241545	3.95837	6.15527	0.0207592	0.0500857
	ENSMUSG00000013997.11	Nit1	0.0726225	5.55783	3.58159	0.0709386	0.135804
	ENSMUSG00000014030.16	Pax5	-0.41347	4.56947	5.21562	0.0318367	0.0710493
	ENSMUSG00000014039.19	Prdm15	-0.0131953	3.85332	0.041436	0.84047	0.893499
	ENSMUSG00000014074.18	Rnf168	-0.11301	4.8891	4.84996	0.0378255	0.0816006
	ENSMUSG00000014075.16	Dynlt2b	-0.184428	2.72373	2.95423	0.0989416	0.177551
	ENSMUSG00000014077.14	Chp1	0.124415	7.48514	16.6282	0.000455533	0.00212464
	ENSMUSG00000014158.13	Trpv4	-0.100564	3.62022	0.871678	0.360086	0.482708
	ENSMUSG00000014164.16	Klhl3	-0.673814	2.96144	29.5785	1.52601e-05	0.00012733
	ENSMUSG00000014177.11	Tvp23b	0.0733783	4.85552	3.00994	0.0959938	0.173278
	ENSMUSG00000014195.17	Dnajc7	-0.101603	7.11066	8.11447	0.0090338	0.0250661
	ENSMUSG00000014226.11	Cacybp	0.269918	4.99016	19.0787	0.000220317	0.00116746
	ENSMUSG00000014232.15	Cluap1	-0.315758	4.10219	21.735	0.000105395	0.000629229
	ENSMUSG00000014243.6	Zswim7	0.135304	1.42546	0.611253	0.442206	0.563867
	ENSMUSG00000014245.9	Pigl	-0.378953	3.17056	27.8827	2.25578e-05	0.000176522
	ENSMUSG00000014294.5	Ndufa2	0.0689294	5.30897	1.10303	0.304395	0.424739
	ENSMUSG00000014301.14	Pam16	-0.159281	3.26614	3.77691	0.0641655	0.125207
	ENSMUSG00000014303.14	Glis2	0.0378934	6.41756	0.19748	0.660871	0.756577
	ENSMUSG00000014313.16	Cox6c	-0.0623503	6.61148	1.40921	0.247175	0.362378
	ENSMUSG00000014329.15	Bicc1	-0.369332	5.83256	46.0045	6.07923e-07	9.1868e-06
	ENSMUSG00000014349.8	Ube2z	0.227879	6.9079	64.73	3.59481e-08	1.02267e-06
	ENSMUSG00000014353.16	Tmem87b	-0.205697	5.78048	22.5124	8.56912e-05	0.000530294
	ENSMUSG00000014355.11	Anapc1	-0.114874	6.6401	11.4844	0.00249878	0.00862213
	ENSMUSG00000014361.6	Mertk	-0.139293	6.18379	8.30132	0.00837516	0.0235496
	ENSMUSG00000014402.16	Tsg101	0.114524	5.73402	10.2103	0.00398677	0.0127921
	ENSMUSG00000014418.17	Hps5	-0.146279	5.47394	11.1639	0.00280489	0.009522
	ENSMUSG00000014426.10	Map3k4	-0.251057	5.30887	24.4757	5.16458e-05	0.000346671
	ENSMUSG00000014444.18	Piezo1	-0.313498	7.51846	44.6235	7.71871e-07	1.12266e-05
	ENSMUSG00000014453.5	Blk	-0.21602	3.79223	1.35644	0.255966	0.371766
	ENSMUSG00000014470.5	Rnf166	0.410369	5.20858	82.991	3.90589e-09	1.78605e-07
	ENSMUSG00000014496.9	Ankrd28	-0.290422	4.63828	17.4692	0.000353111	0.00172732
	ENSMUSG00000014498.10	Ankrd52	-0.47105	6.01379	128.56	5.93952e-11	8.70414e-09
	ENSMUSG00000014503.16	Pkd2l2	-0.105815	1.89897	0.786897	0.384124	0.50798
	ENSMUSG00000014504.17	Srp19	-0.186104	4.59497	8.56319	0.00753938	0.0215787
	ENSMUSG00000014547.11	Wdfy2	-0.0590027	5.21126	0.968803	0.335111	0.456812
	ENSMUSG00000014550.15	Rbsn	-0.25994	5.6052	38.8104	2.23485e-06	2.64766e-05
	ENSMUSG00000014551.9	Mrps25	0.350599	5.88604	39.3313	2.02347e-06	2.43753e-05
	ENSMUSG00000014554.14	Dguok	-0.0223819	4.96016	0.255429	0.682968	0.773815
	ENSMUSG00000014592.22	Camta1	-0.153172	4.00583	4.49288	0.04492	0.0938742
	ENSMUSG00000014599.11	Csf1	-0.177951	6.5417	4.41768	0.0465983	0.0967184
	ENSMUSG00000014601.14	Strip1	0.232157	5.58337	17.8014	0.000319821	0.00159307
	ENSMUSG00000014602.16	Kif1a	-0.889108	3.61224	35.1536	4.60476e-06	4.83458e-05
	ENSMUSG00000014606.15	Slc25a11	0.0189381	6.18641	0.238874	0.629599	0.730316
	ENSMUSG00000014633.16	Cmc2	0.112146	2.92897	1.63884	0.21311	0.323673
	ENSMUSG00000014668.16	Chfr	0.182043	5.20154	13.7906	0.00112683	0.00449982
	ENSMUSG00000014704.11	Hoxa2	-0.301489	2.6911	5.06878	0.0341038	0.0752259
	ENSMUSG00000014725.17	Adam28	-0.0801822	3.94807	0.574875	0.455945	0.57651
	ENSMUSG00000014748.14	Tex261	0.128184	6.85116	15.0555	0.000745561	0.003196
	ENSMUSG00000014763.9	Fam120b	0.0146188	5.76754	0.152365	0.699838	0.787368
	ENSMUSG00000014767.18	Tbp	0.123952	4.61149	4.2835	0.0497717	0.101958
	ENSMUSG00000014769.11	Psmb1	0.00161885	6.46584	0.00261293	0.959669	0.974139
	ENSMUSG00000014771.14	Pdcd2	0.00321609	3.26638	0.00159486	0.968485	0.980266
	ENSMUSG00000014773.14	Dll1	0.402023	5.444	9.02573	0.00627843	0.0185607
	ENSMUSG00000014776.8	Nol3	-0.00633388	4.60678	0.0103786	0.919729	0.947252
	ENSMUSG00000014778.11	Fhod1	0.249534	7.45393	15.6701	0.000613368	0.00270866
	ENSMUSG00000014786.9	Slc9a5	0.0699684	3.5065	0.841208	0.368467	0.491525
	ENSMUSG00000014791.11	Elmo3	0.0853934	5.07037	2.60096	0.12029	0.207185
	ENSMUSG00000014813.10	Stc1	0.114383	2.64604	0.612908	0.441596	0.563372
	ENSMUSG00000014837.16	4931428F04Rik	-0.164583	2.29813	1.3047	0.264982	0.381367
	ENSMUSG00000014846.13	Tppp3	0.086043	8.48341	1.09393	0.306353	0.426989
	ENSMUSG00000014850.16	Msh3	-0.111356	3.81745	2.54935	0.123843	0.21213
	ENSMUSG00000014856.13	Tmem208	0.0875088	4.75964	2.69889	0.113875	0.198269
	ENSMUSG00000014859.10	E2f4	0.341304	5.86596	56.539	1.13868e-07	2.48771e-06
	ENSMUSG00000014867.10	Surf4	0.220866	7.61812	29.8908	1.42206e-05	0.000120619
	ENSMUSG00000014873.16	Surf2	0.0571509	4.62178	1.6946	0.205746	0.314931
	ENSMUSG00000014905.5	Dnajb9	-0.0333272	5.33758	0.134727	0.7169	0.799975
	ENSMUSG00000014907.11	Naf1	0.31389	4.06264	22.265	9.14881e-05	0.000556686
	ENSMUSG00000014932.16	Yes1	-0.255636	5.0047	7.33711	0.0124585	0.0327772
	ENSMUSG00000014956.16	Ppp1cb	0.109705	7.30205	1.03457	0.319555	0.440357
	ENSMUSG00000014959.13	Gorasp2	0.232477	6.83855	56.0475	1.22489e-07	2.61775e-06
	ENSMUSG00000014980.15	Tsen15	-0.0662561	3.81345	1.07822	0.309775	0.430506
	ENSMUSG00000015002.19	Efr3a	-0.106294	5.99462	6.71714	0.016228	0.040843
	ENSMUSG00000015013.10	Trappc2l	0.035657	4.25319	0.309556	0.583268	0.691244
	ENSMUSG00000015016.9	Acsf3	0.030822	4.12403	0.185347	0.670782	0.764061
	ENSMUSG00000015023.8	Ddx19a	0.189944	5.48075	32.3308	8.31504e-06	7.77512e-05
	ENSMUSG00000015027.12	Galns	0.241512	4.11163	13.3065	0.00132545	0.00513541
	ENSMUSG00000015053.15	Gata2	0.64606	7.57695	157.232	7.84647e-12	2.35922e-09
	ENSMUSG00000015083.12	C8g	-0.310241	0.38877	1.89133	0.182159	0.286728
	ENSMUSG00000015085.9	Entpd2	0.182307	3.55607	2.67603	0.115336	0.20031
	ENSMUSG00000015087.15	Rabl6	0.0215256	6.29825	0.467871	0.500729	0.617685
	ENSMUSG00000015092.10	Edf1	0.103585	6.15096	8.11721	0.00902375	0.0250422
	ENSMUSG00000015093.16	Clic3	0.077064	6.99832	2.14233	0.156673	0.255563
	ENSMUSG00000015094.17	Npdc1	0.228274	6.38344	16.6098	0.0004581	0.00213333
	ENSMUSG00000015095.13	Fbxw5	0.292905	6.0768	72.7797	1.2819e-08	4.6093e-07
	ENSMUSG00000015112.16	Slc25a13	0.18185	2.82382	3.48948	0.074414	0.141347
	ENSMUSG00000015120.16	Ube2i	-0.14212	7.34075	19.8271	0.000178106	0.000983218
	ENSMUSG00000015126.10	Tsr3	0.00564675	3.643	0.00602861	0.938775	0.96035
	ENSMUSG00000015127.15	Unkl	-0.177191	5.40649	13.796	0.00112481	0.00449385
	ENSMUSG00000015133.18	Lrrk1	-0.471011	6.96584	115.164	1.75256e-10	1.92219e-08
	ENSMUSG00000015134.16	Aldh1a3	-0.0547551	0.936862	0.0606536	0.807627	0.869181
	ENSMUSG00000015143.16	Actn1	0.249622	7.47272	35.3345	4.43817e-06	4.68222e-05
	ENSMUSG00000015149.15	Sirt2	0.0489318	6.57481	2.1556	0.15545	0.254043
	ENSMUSG00000015165.17	Hnrnpl	-0.0587405	7.81107	3.55832	0.0717987	0.137237
	ENSMUSG00000015176.12	Nolc1	0.250262	5.61802	30.1065	1.35479e-05	0.000115929
	ENSMUSG00000015189.13	Casd1	0.0721037	5.47711	1.00369	0.326733	0.448054
	ENSMUSG00000015202.14	Cnksr3	0.485972	4.44932	55.6488	1.30004e-07	2.7282e-06
	ENSMUSG00000015214.15	Mtmr1	-0.109209	4.97914	4.05985	0.0556193	0.111501
	ENSMUSG00000015217.12	Hmgb3	0.204741	4.15688	5.45501	0.028493	0.0650123
	ENSMUSG00000015222.19	Map2	-0.2589	3.02219	5.07341	0.0340296	0.0751003
	ENSMUSG00000015224.11	Cyp2j9	-0.280142	3.17999	12.1066	0.0020038	0.00721243
	ENSMUSG00000015243.5	Abca1	-0.359509	5.74952	9.11262	0.00606848	0.018041
	ENSMUSG00000015247.11	Nipsnap3b	0.227835	4.19376	21.6633	0.000107446	0.000639505
	ENSMUSG00000015289.5	Lage3	0.0504439	3.99703	0.935478	0.343397	0.465777
	ENSMUSG00000015290.16	Ubl4a	0.183053	5.62129	19.193	0.000213219	0.00113364
	ENSMUSG00000015291.11	Gdi1	0.122109	7.83606	9.64343	0.00494204	0.0152701
	ENSMUSG00000015305.7	Sash1	-0.649768	7.25971	151.486	1.14544e-11	3.07312e-09
	ENSMUSG00000015312.10	Gadd45b	-0.0472135	6.25463	0.956097	0.338237	0.460031
	ENSMUSG00000015314.11	Slamf6	0.662332	3.05458	18.1461	0.000288862	0.0014614
	ENSMUSG00000015316.12	Slamf1	0.346908	1.12099	2.49574	0.127664	0.217309
	ENSMUSG00000015335.17	Zdhhc12	0.20221	3.76134	9.84742	0.00457203	0.0143325
	ENSMUSG00000015337.6	Endog	0.0712632	3.95259	0.369485	0.549177	0.661134
	ENSMUSG00000015340.11	Cybb	-0.217627	6.6652	4.24737	0.0506675	0.103392
	ENSMUSG00000015341.18	Golga7	-0.0182577	6.28674	0.155529	0.696901	0.78501
	ENSMUSG00000015342.7	Xk	0.386857	1.46989	8.49775	0.00773928	0.0220531
	ENSMUSG00000015354.9	Pcolce2	0.0138567	8.25891	0.0430773	0.837387	0.890982
	ENSMUSG00000015355.14	Cd48	0.607185	4.36694	36.5557	3.47124e-06	3.82407e-05
	ENSMUSG00000015357.11	Clpx	0.0177629	5.29033	0.183521	0.672307	0.765298
	ENSMUSG00000015363.14	Trabd	0.215468	5.97622	15.0883	0.000737758	0.00316735
	ENSMUSG00000015377.11	Dennd6b	-0.0751538	4.21315	1.3351	0.259636	0.375719
	ENSMUSG00000015396.5	Cd83	0.0604941	4.44548	0.4662	0.501487	0.618402
	ENSMUSG00000015405.16	Ace2	-0.00138296	4.13011	0.00032755	0.985715	0.991114
	ENSMUSG00000015437.6	Gzmb	2.14716	3.45708	96.7995	9.30108e-10	6.2856e-08
	ENSMUSG00000015451.17	C4a	-0.208237	0.553278	1.30238	0.265397	0.381743
	ENSMUSG00000015452.15	Ager	0.0190213	10.8877	0.111666	0.74125	0.818921
	ENSMUSG00000015461.16	Atf6b	0.390997	5.86318	53.0944	1.91804e-07	3.72066e-06
	ENSMUSG00000015467.15	Egfl8	0.357219	1.32141	7.59518	0.0111842	0.0299373
	ENSMUSG00000015468.15	Notch4	0.0697436	7.3137	0.701563	0.410786	0.53345
	ENSMUSG00000015474.17	Ppt2	0.219482	5.0822	14.6044	0.000862342	0.00359776
	ENSMUSG00000015476.7	Prrt1	0.0171086	2.41415	0.0179227	0.894653	0.930462
	ENSMUSG00000015478.14	Rnf5	0.214227	4.80472	18.8112	0.000237959	0.00124655
	ENSMUSG00000015488.15	Cacfd1	0.230811	5.75602	20.4347	0.000150296	0.000849321
	ENSMUSG00000015501.11	Hivep2	-0.334231	5.68985	43.5621	9.30523e-07	1.30445e-05
	ENSMUSG00000015522.19	Arnt	-0.172862	6.56381	23.6878	6.31102e-05	0.000410817
	ENSMUSG00000015533.10	Itga2	-0.354365	4.891	26.6873	2.99604e-05	0.000221483
	ENSMUSG00000015536.15	Mocs2	-0.0559765	5.23562	1.36255	0.254927	0.37072
	ENSMUSG00000015542.18	Nat9	-0.108566	4.26599	3.0933	0.0917712	0.167143
	ENSMUSG00000015568.17	Lpl	-0.135975	7.82961	0.949561	0.339861	0.461987
	ENSMUSG00000015575.16	Atp6v0e	0.0375171	5.98961	0.534537	0.47201	0.591802
	ENSMUSG00000015597.18	Zfp318	-0.327825	5.19816	39.5132	1.95484e-06	2.36739e-05
	ENSMUSG00000015599.10	Ttbk1	-0.114698	-0.179942	0.231729	0.634744	0.734331
	ENSMUSG00000015605.7	Srf	0.790359	5.87682	205.286	4.97407e-13	3.34127e-10
	ENSMUSG00000015619.11	Gata3	-0.217428	3.79127	3.50246	0.0739126	0.140563
	ENSMUSG00000015627.6	Gata5	-0.16906	4.07944	1.35423	0.256343	0.37222
	ENSMUSG00000015647.10	Lama5	-0.547208	7.81659	95.4275	1.06442e-09	6.96951e-08
	ENSMUSG00000015652.10	Steap1	0.916285	0.441251	14.6636	0.000845933	0.00354365
	ENSMUSG00000015653.14	Steap2	0.123173	4.08444	2.98532	0.0972837	0.175189
	ENSMUSG00000015656.18	Hspa8	0.514272	10.202	24.7624	4.80537e-05	0.000326964
	ENSMUSG00000015659.13	Serac1	-0.732198	2.69544	68.2612	2.26101e-08	7.2339e-07
	ENSMUSG00000015668.14	Pdzd11	-0.157197	4.57995	6.79102	0.0157186	0.0397905
	ENSMUSG00000015671.12	Psma2	0.134299	6.17843	10.7819	0.00322453	0.0107212
	ENSMUSG00000015672.5	Mrpl32	-0.0449266	4.10958	0.533837	0.472297	0.592035
	ENSMUSG00000015697.15	Setdb1	-0.159421	5.64985	18.5621	0.00025578	0.00132164
	ENSMUSG00000015702.14	Anxa9	-0.318823	2.7505	10.1092	0.00414104	0.0131949
	ENSMUSG00000015709.10	Arnt2	0.147066	0.617191	0.495321	0.488552	0.60713
	ENSMUSG00000015711.9	Prune1	-0.0116652	5.04244	0.0503091	0.824486	0.88199
	ENSMUSG00000015714.12	Cers2	0.0936876	8.13652	7.18831	0.0132656	0.0345127
	ENSMUSG00000015733.14	Capza2	0.151055	7.07106	4.57106	0.0432473	0.0910307
	ENSMUSG00000015745.10	Plekho1	0.153377	5.77549	4.4709	0.0454036	0.0946894
	ENSMUSG00000015747.6	Vps45	0.0268425	3.61052	0.13496	0.716667	0.799869
	ENSMUSG00000015748.14	Prpf3	0.0415895	4.77735	0.837898	0.369395	0.492649
	ENSMUSG00000015749.13	Anp32e	-0.0105761	6.59773	0.0322534	0.859028	0.906158
	ENSMUSG00000015750.16	Aph1a	0.284393	7.20419	60.1201	6.78147e-08	1.65551e-06
	ENSMUSG00000015755.17	Tab2	-0.135802	7.03555	10.6139	0.00343049	0.0112983
	ENSMUSG00000015757.11	Ppil4	0.00353626	5.53843	0.00795291	0.929703	0.954441
	ENSMUSG00000015759.12	Cnih1	0.0616408	5.51722	2.01198	0.169326	0.270803
	ENSMUSG00000015766.15	Eps8	0.050319	5.32264	2.0612	0.164409	0.26488
	ENSMUSG00000015776.13	Med22	0.0843388	5.95605	2.71127	0.113092	0.197182
	ENSMUSG00000015790.17	Surf1	-0.0506998	5.27772	1.58296	0.220822	0.332435
	ENSMUSG00000015804.15	Med28	0.0762474	5.78774	3.8775	0.0609668	0.120081
	ENSMUSG00000015806.13	Qdpr	0.10011	5.45202	5.75083	0.0248906	0.0581548
	ENSMUSG00000015829.14	Tnr	-0.526355	0.0991726	3.92951	0.0593844	0.117442
	ENSMUSG00000015837.16	Sqstm1	0.0206977	8.78585	0.202432	0.656931	0.753228
	ENSMUSG00000015839.7	Nfe2l2	0.139156	7.58097	10.111	0.00413829	0.0131885
	ENSMUSG00000015843.11	Rxrg	0.0504978	0.864139	0.0391164	0.844937	0.896881
	ENSMUSG00000015846.16	Rxra	0.0876704	6.93493	2.96965	0.0981149	0.176358
	ENSMUSG00000015850.12	Adamtsl4	0.335316	6.83458	21.2192	0.000121164	0.000706684
	ENSMUSG00000015852.14	Fcrls	0.0360815	3.42078	0.0990506	0.755779	0.830029
	ENSMUSG00000015854.8	Cd5l	1.01966	-0.483444	1.6641	0.209734	0.319548
	ENSMUSG00000015869.18	Prpsap1	0.220572	5.61697	16.6596	0.000451161	0.0021082
	ENSMUSG00000015880.14	Ncapg	1.74365	1.25401	40.8508	1.52156e-06	1.93965e-05
	ENSMUSG00000015882.19	Lcorl	-0.0817525	3.01717	0.320615	0.576663	0.68551
	ENSMUSG00000015889.9	Lta4h	0.0556809	5.99412	1.46361	0.238514	0.353033
	ENSMUSG00000015932.9	Dstn	0.0903084	8.56715	3.76604	0.0645227	0.125648
	ENSMUSG00000015937.16	Macroh2a1	0.0686392	6.59203	3.45181	0.0758908	0.143683
	ENSMUSG00000015942.10	Gtf2ird2	0.0345658	3.71851	0.368635	0.549633	0.661503
	ENSMUSG00000015943.12	Bola1	0.0928347	3.29348	0.922424	0.346721	0.469155
	ENSMUSG00000015944.10	Castor2	-0.557422	5.41179	92.0439	1.49476e-09	9.05107e-08
	ENSMUSG00000015947.11	Fcgr1	0.552827	3.61331	8.56124	0.00754526	0.021592
	ENSMUSG00000015950.14	Ncf1	0.0561204	5.42421	0.579071	0.454325	0.57492
	ENSMUSG00000015957.13	Wnt11	0.159968	3.62993	2.36325	0.137721	0.230691
	ENSMUSG00000015961.9	Adss	0.0102863	6.0334	0.0625984	0.804633	0.867029
	ENSMUSG00000015966.18	Il17rb	-0.347624	0.944413	2.98184	0.0974674	0.175484
	ENSMUSG00000015968.19	Cacna1d	-0.405167	5.69932	51.1043	2.62123e-07	4.7966e-06
	ENSMUSG00000015970.20	Chdh	-0.303865	2.11077	2.20091	0.151359	0.248631
	ENSMUSG00000015971.6	Actr8	-0.0385675	5.40385	0.972492	0.334211	0.45587
	ENSMUSG00000015980.15	Lrrc27	0.104827	2.05741	0.558665	0.462291	0.58262
	ENSMUSG00000015981.13	Stk32c	0.450684	0.672931	8.76394	0.00696082	0.0202249
	ENSMUSG00000015994.11	Fnta	-0.000962502	6.055	0.000779405	0.977966	0.986462
	ENSMUSG00000016018.5	Mtrex	-0.0148283	5.91613	0.115084	0.737473	0.816299
	ENSMUSG00000016024.10	Lbp	0.34595	6.24241	19.0292	0.000223471	0.00118274
	ENSMUSG00000016028.12	Celsr1	-0.306527	5.61263	53.1195	1.91059e-07	3.71447e-06
	ENSMUSG00000016087.14	Fli1	0.391772	5.15247	23.9815	5.85422e-05	0.000385834
	ENSMUSG00000016128.15	Stard13	-0.536774	7.26886	144.998	1.78314e-11	3.90887e-09
	ENSMUSG00000016181.11	Utp25	0.0561519	3.92031	0.790576	0.383033	0.506922
	ENSMUSG00000016194.15	Hsd11b1	0.184447	7.81616	6.73235	0.0161217	0.040628
	ENSMUSG00000016200.15	Syt14	0.040874	0.421131	0.0319729	0.859636	0.906579
	ENSMUSG00000016206.7	H2-M3	0.0573144	4.57065	0.324211	0.574548	0.683788
	ENSMUSG00000016239.12	Lonrf3	-0.691635	1.22943	14.8344	0.000800481	0.00338414
	ENSMUSG00000016252.8	Atp5e	-0.0176721	6.20532	0.0856423	0.772388	0.842539
	ENSMUSG00000016253.13	Nelfcd	0.103183	5.24662	3.84084	0.0621112	0.121909
	ENSMUSG00000016255.6	Tubb1	-0.790221	2.91753	7.48109	0.0117289	0.0311419
	ENSMUSG00000016256.11	Ctsz	0.273628	7.21032	17.8541	0.000314857	0.00157014
	ENSMUSG00000016257.16	Prelid3b	0.146583	4.65684	5.47026	0.0282937	0.0646422
	ENSMUSG00000016262.15	Sertad4	0.256101	2.46517	4.12886	0.0537358	0.108599
	ENSMUSG00000016283.14	H2-M2	-0.535259	1.18336	3.92358	0.0595623	0.117727
	ENSMUSG00000016308.14	Ube2a	0.20472	4.59053	4.97965	0.0355678	0.0777764
	ENSMUSG00000016319.4	Slc25a5	0.2945	7.68682	59.5166	7.38852e-08	1.76747e-06
	ENSMUSG00000016344.15	Ppdpf	0.0198794	5.37756	0.134807	0.71682	0.799937
	ENSMUSG00000016349.11	Eef1a2	0.0252002	3.61371	0.00862675	0.926794	0.952296
	ENSMUSG00000016356.19	Col20a1	-0.140451	2.44648	2.13982	0.156906	0.255799
	ENSMUSG00000016382.16	Pls3	0.0300752	7.97474	0.32085	0.576525	0.685432
	ENSMUSG00000016386.16	Mpped2	0.154151	1.99203	1.48608	0.235049	0.349002
	ENSMUSG00000016409.5	Nkap	-0.22674	4.30634	14.9858	0.00076241	0.00325555
	ENSMUSG00000016427.8	Ndufa1	0.0418915	4.56222	0.437998	0.514597	0.630466
	ENSMUSG00000016458.16	Wt1	0.0353656	1.96216	0.0454964	0.832953	0.888143
	ENSMUSG00000016477.19	E2f3	0.0428707	3.4914	0.198393	0.66014	0.755938
	ENSMUSG00000016481.16	Cr1l	-0.0775836	6.52823	4.48718	0.045045	0.0940991
	ENSMUSG00000016487.16	Ppfibp1	-0.352635	6.93428	28.5836	1.91615e-05	0.000154345
	ENSMUSG00000016493.14	Cd46	-0.284693	2.872	5.23409	0.0315637	0.0705524
	ENSMUSG00000016494.10	Cd34	0.181335	7.90154	6.06628	0.0215982	0.0517449
	ENSMUSG00000016495.13	Plgrkt	-0.0747237	5.51463	3.22086	0.0857183	0.158184
	ENSMUSG00000016496.8	Cd274	-0.0149205	5.91027	0.00541906	0.941947	0.962704
	ENSMUSG00000016498.11	Pdcd1lg2	-0.605297	-0.05343	5.16506	0.0325977	0.0724537
	ENSMUSG00000016503.19	Gtf3a	0.172297	4.62508	9.58047	0.00506278	0.0155532
	ENSMUSG00000016510.12	Mtif3	-0.094138	4.08771	2.23177	0.148647	0.244933
	ENSMUSG00000016520.8	Lnx2	0.417003	5.77818	52.9504	1.96131e-07	3.78355e-06
	ENSMUSG00000016526.9	Dyrk3	0.349797	2.54033	7.99567	0.00948218	0.0261108
	ENSMUSG00000016528.11	Mapkapk2	0.357398	7.48558	105.184	4.21332e-10	3.50175e-08
	ENSMUSG00000016534.16	Lamp2	0.187348	7.99353	4.08609	0.0548942	0.110364
	ENSMUSG00000016541.11	Atxn10	0.000270576	7.15515	3.81294e-05	0.995126	0.996748
	ENSMUSG00000016552.14	Foxred2	-0.128486	2.32861	0.60906	0.443015	0.564615
	ENSMUSG00000016554.10	Eif3d	0.200301	6.31189	15.1866	0.000714939	0.00308076
	ENSMUSG00000016559.15	H3f3b	0.0472826	8.86998	0.61181	0.442	0.563701
	ENSMUSG00000016619.11	Nup50	0.0669576	5.56081	1.99964	0.170587	0.272374
	ENSMUSG00000016624.16	Phf21b	0.459612	1.51322	8.86328	0.00669271	0.0195665
	ENSMUSG00000016637.8	Ift27	0.0687353	4.06394	1.02244	0.322348	0.4434
	ENSMUSG00000016664.17	Pacsin2	0.0572997	7.40957	2.85455	0.104482	0.185357
	ENSMUSG00000016756.18	Cmah	-0.168013	4.43372	3.26803	0.0835974	0.155107
	ENSMUSG00000016757.12	Ttll12	0.334869	4.55639	32.3983	8.19533e-06	7.68379e-05
	ENSMUSG00000016758.5	Bik	-0.0691602	3.22444	0.338392	0.566356	0.676764
	ENSMUSG00000016763.16	Scube1	-0.204602	4.92365	7.0476	0.0140823	0.0363447
	ENSMUSG00000016831.13	Tox4	0.019905	6.44967	0.380798	0.543173	0.656392
	ENSMUSG00000016833.15	Mrps18c	-0.159841	3.71035	6.16744	0.0206473	0.0498847
	ENSMUSG00000016918.16	Sulf1	-0.0843107	5.92298	1.81675	0.190688	0.297389
	ENSMUSG00000016921.15	Srsf6	0.090154	7.7096	2.81551	0.10675	0.188518
	ENSMUSG00000016933.18	Plcg1	-0.263605	7.63267	25.8146	3.70267e-05	0.000262804
	ENSMUSG00000016940.19	Kctd2	-0.135196	5.84111	10.0899	0.00417125	0.0132704
	ENSMUSG00000016946.7	Kctd5	0.222675	5.05118	18.2795	0.000277773	0.00141764
	ENSMUSG00000016984.8	Etaa1	0.0455107	3.46613	0.163389	0.68975	0.779561
	ENSMUSG00000016995.18	Matn4	0.193143	6.13583	6.36808	0.0188957	0.0463464
	ENSMUSG00000017002.15	Slpi	0.363999	4.07153	5.30273	0.0305718	0.0687777
	ENSMUSG00000017007.10	Rbpjl	-0.00426758	6.4096	0.00328143	0.954809	0.970898
	ENSMUSG00000017009.4	Sdc4	0.131539	7.64339	10.0526	0.00423026	0.0134276
	ENSMUSG00000017057.10	Il13ra1	0.207435	5.73168	7.45087	0.011878	0.0314612
	ENSMUSG00000017119.21	Nbr1	-0.294367	7.30985	71.647	1.47404e-08	5.0802e-07
	ENSMUSG00000017132.18	Cyth1	0.364498	5.91506	90.7004	1.71529e-09	9.68096e-08
	ENSMUSG00000017144.9	Rnd3	-0.318672	4.69611	21.5868	0.000109683	0.000649715
	ENSMUSG00000017146.13	Brca1	0.570666	1.3073	7.49064	0.0116822	0.0310421
	ENSMUSG00000017167.7	Cntnap1	0.01886	2.86094	0.0351741	0.852858	0.902159
	ENSMUSG00000017176.18	Nt5c3b	0.185757	4.51874	11.5887	0.00240723	0.00836607
	ENSMUSG00000017188.4	Coa3	0.0672309	5.3128	1.83917	0.188072	0.294161
	ENSMUSG00000017210.15	Med24	0.0284711	5.47197	0.413479	0.5265	0.642015
	ENSMUSG00000017221.15	Psmd3	0.316341	6.70546	68.5408	2.18121e-08	7.00518e-07
	ENSMUSG00000017264.17	Exosc10	0.0449477	5.77247	1.28937	0.267734	0.384376
	ENSMUSG00000017286.16	Glod4	-0.196563	5.4659	4.48543	0.0450834	0.0941567
	ENSMUSG00000017288.16	Vps53	0.015959	5.2056	0.155152	0.697249	0.785284
	ENSMUSG00000017291.14	Taok1	-0.049787	6.25495	0.289724	0.595513	0.701274
	ENSMUSG00000017299.14	Dnttip1	0.310513	4.1764	32.1593	8.62771e-06	8.01164e-05
	ENSMUSG00000017307.17	Acot8	0.119816	3.62862	3.0558	0.0936433	0.169896
	ENSMUSG00000017309.12	Cd300lg	-0.375217	4.73559	5.18808	0.0322487	0.0717968
	ENSMUSG00000017314.13	Mpp2	0.435792	4.56648	64.0631	3.93215e-08	1.08673e-06
	ENSMUSG00000017344.5	Vtn	-0.16458	4.71189	5.96407	0.0226086	0.0537961
	ENSMUSG00000017376.16	Nlk	-0.198439	5.19734	5.84743	0.0238265	0.056188
	ENSMUSG00000017386.11	Traf4	0.227125	4.37826	16.1549	0.000527118	0.00239511
	ENSMUSG00000017390.16	Aldoc	0.169911	3.02304	2.72276	0.112372	0.196201
	ENSMUSG00000017400.11	Stac2	-0.15273	1.46833	0.708934	0.408375	0.531625
	ENSMUSG00000017404.13	Rpl19	0.044998	8.6444	0.872971	0.359737	0.48235
	ENSMUSG00000017405.15	Nek8	-0.00284257	3.93214	0.00233092	0.961906	0.975383
	ENSMUSG00000017412.16	Cacnb4	-0.293	0.539161	1.81503	0.190889	0.297623
	ENSMUSG00000017417.15	Plxdc1	-0.0856773	4.66619	1.55576	0.224704	0.336882
	ENSMUSG00000017418.15	Arl5b	-0.169779	5.0452	4.26369	0.0502606	0.102766
	ENSMUSG00000017421.19	Zfp207	0.0373564	7.01039	0.700354	0.411184	0.533688
	ENSMUSG00000017428.17	Psmd11	0.175167	6.15073	23.0142	7.51265e-05	0.000474173
	ENSMUSG00000017446.15	C1qtnf1	-0.065453	5.43638	1.05329	0.315309	0.436161
	ENSMUSG00000017453.5	Pipox	0.231943	0.797339	1.87481	0.184006	0.289094
	ENSMUSG00000017466.10	ENSMUSG00000017466.10	0.0946676	9.68607	5.77994	0.0245645	0.0575935
	ENSMUSG00000017478.16	Zc3h18	0.0265624	6.15542	0.634424	0.433795	0.555797
	ENSMUSG00000017485.12	Top2b	-0.259667	6.76616	26.5652	3.08543e-05	0.000226937
	ENSMUSG00000017491.10	Rarb	-0.00909823	2.41208	0.00598207	0.939012	0.960473
	ENSMUSG00000017493.13	Igfbp4	0.257408	8.16673	24.7873	4.77557e-05	0.00032519
	ENSMUSG00000017499.16	Cdc6	0.792348	1.4837	15.9587	0.000560311	0.00251577
	ENSMUSG00000017548.16	Suz12	0.014704	5.47915	0.0352357	0.852731	0.902105
	ENSMUSG00000017550.15	Atad5	-0.119473	2.17851	0.854591	0.364752	0.487538
	ENSMUSG00000017561.17	Crlf3	0.208519	5.84197	18.4165	0.00026686	0.00137077
	ENSMUSG00000017607.10	Tns4	-0.138355	1.34361	0.888996	0.355444	0.477844
	ENSMUSG00000017615.13	Tnfaip1	0.0930605	7.65722	4.74626	0.0397468	0.0850797
	ENSMUSG00000017631.20	Abr	-0.145337	6.66496	17.2777	0.000373996	0.00181523
	ENSMUSG00000017639.14	Rab11fip4	-0.323513	4.27666	12.766	0.00159352	0.00597106
	ENSMUSG00000017652.17	Cd40	0.035717	4.24366	0.313371	0.580973	0.689176
	ENSMUSG00000017664.17	Slc35c2	0.133997	5.08686	9.46187	0.00529914	0.0161333
	ENSMUSG00000017667.10	Zfp334	-0.27269	4.0974	21.9157	0.000100409	0.000602558
	ENSMUSG00000017670.17	Elmo2	0.00446232	6.63777	0.00914929	0.924617	0.950618
	ENSMUSG00000017677.12	Wsb1	-0.164018	6.59029	4.46445	0.0455466	0.0949649
	ENSMUSG00000017679.17	Ttpal	0.268329	5.44508	22.0412	9.70992e-05	0.000584506
	ENSMUSG00000017686.18	Rhot1	0.102083	5.77381	5.32802	0.030215	0.0680951
	ENSMUSG00000017692.9	Rhbdl3	0.0445271	2.83543	0.238491	0.629872	0.730536
	ENSMUSG00000017697.4	Ada	0.154573	1.74007	0.489234	0.491208	0.609735
	ENSMUSG00000017707.10	Serinc3	0.0741548	9.92006	1.34302	0.258266	0.374295
	ENSMUSG00000017713.10	Tha1	0.316358	3.15557	8.06663	0.00921148	0.0255185
	ENSMUSG00000017715.12	Pgs1	0.347092	6.49861	48.4568	4.02571e-07	6.60436e-06
	ENSMUSG00000017716.16	Birc5	1.60729	2.42673	44.5152	7.86612e-07	1.1384e-05
	ENSMUSG00000017718.16	Afmid	0.0103855	2.56164	0.00661682	0.935865	0.958397
	ENSMUSG00000017721.16	Pigt	0.524253	6.35689	102.085	5.6106e-10	4.32934e-08
	ENSMUSG00000017723.12	Wfdc2	0.418757	9.01209	29.3537	1.60593e-05	0.000132981
	ENSMUSG00000017734.16	Dbndd2	0.068429	5.4627	1.9738	0.173265	0.275614
	ENSMUSG00000017737.3	Mmp9	-0.0900581	4.24058	0.358425	0.55517	0.666319
	ENSMUSG00000017740.18	Slc12a5	-0.906322	3.19067	19.6679	0.000186286	0.00101647
	ENSMUSG00000017747.14	Ghdc	0.0647425	4.41731	1.21509	0.281605	0.399879
	ENSMUSG00000017754.14	Pltp	0.196563	9.12286	20.2553	0.000157981	0.000887287
	ENSMUSG00000017756.10	Slc12a7	-0.128119	6.5566	3.92829	0.0594209	0.117474
	ENSMUSG00000017760.17	Ctsa	0.110078	7.58	7.17277	0.0133532	0.0347043
	ENSMUSG00000017764.3	Zswim1	0.244898	3.69125	13.9116	0.00108245	0.00434795
	ENSMUSG00000017765.18	Slc12a4	0.242553	6.613	23.1719	7.21046e-05	0.00045942
	ENSMUSG00000017774.20	Myo1c	-0.0477947	8.87667	1.38	0.251992	0.367432
	ENSMUSG00000017776.16	Crk	0.128454	7.40232	7.8432	0.0100939	0.0274872
	ENSMUSG00000017778.15	Cox7c	-0.0301354	5.66047	0.248907	0.622533	0.724391
	ENSMUSG00000017781.18	Pitpna	0.112696	7.39686	10.7673	0.00324193	0.0107708
	ENSMUSG00000017801.16	Mlx	0.199523	4.9786	18.1202	0.000291075	0.00147004
	ENSMUSG00000017802.15	Retreg3	0.0577762	6.64134	3.29634	0.0823537	0.153338
	ENSMUSG00000017817.12	Jph2	0.519161	5.43083	58.1609	8.97865e-08	2.06296e-06
	ENSMUSG00000017830.16	Dhx58	0.141718	5.12214	1.48872	0.234646	0.348618
	ENSMUSG00000017831.9	Rab5a	-0.0341189	6.10771	0.32828	0.572173	0.681659
	ENSMUSG00000017837.13	Nkiras2	0.265132	5.27785	33.9731	5.87411e-06	5.88349e-05
	ENSMUSG00000017843.15	Ppp2r5c	-0.0047676	6.89771	0.0148918	0.903922	0.936854
	ENSMUSG00000017858.13	Ift52	-0.180975	5.12664	8.45267	0.00788037	0.0223857
	ENSMUSG00000017861.12	Mybl2	1.04782	2.14211	61.8896	5.29327e-08	1.3757e-06
	ENSMUSG00000017897.19	Eya2	0.193213	5.48229	18.4741	0.000262418	0.00135074
	ENSMUSG00000017929.14	B4galt5	0.622562	5.76474	50.4996	2.88704e-07	5.10482e-06
	ENSMUSG00000017969.14	Ptgis	0.460529	6.45711	28.3849	2.00643e-05	0.000160727
	ENSMUSG00000017978.19	Cadps2	-0.186249	5.10768	10.7494	0.00326333	0.0108254
	ENSMUSG00000017999.17	Ddx27	0.220216	5.0248	21.6117	0.000108948	0.000646239
	ENSMUSG00000018001.19	Cyth3	0.0913486	8.29499	2.19049	0.152288	0.249695
	ENSMUSG00000018008.9	Cyth4	0.193784	5.99392	5.22068	0.0317617	0.0709481
	ENSMUSG00000018012.12	Rac3	0.111757	4.05968	1.52717	0.228878	0.341671
	ENSMUSG00000018040.10	Rrp7a	0.250621	5.74252	37.6927	2.77414e-06	3.15785e-05
	ENSMUSG00000018042.19	Cyb5r3	0.167164	8.61596	10.4043	0.00370789	0.0120593
	ENSMUSG00000018068.14	Ints2	-0.264674	3.49621	15.1042	0.000734024	0.00315287
	ENSMUSG00000018076.13	Med13l	-0.616558	5.84618	154.003	9.69074e-12	2.75593e-09
	ENSMUSG00000018102.6	H2bc4	0.152959	5.69155	4.42797	0.0463647	0.0963712
	ENSMUSG00000018143.11	Mafk	0.292315	6.65739	23.6818	6.3209e-05	0.000411289
	ENSMUSG00000018160.16	Med1	-0.202556	5.63264	25.3708	4.13002e-05	0.000288157
	ENSMUSG00000018166.9	Erbb3	-0.558188	6.12712	77.7015	7.11982e-09	2.91461e-07
	ENSMUSG00000018167.11	Stard3	0.223382	6.05232	19.7143	0.000183857	0.00100637
	ENSMUSG00000018168.9	Ikzf3	-0.140673	4.01312	0.859708	0.363346	0.485994
	ENSMUSG00000018169.13	Mfng	0.236437	5.49126	21.4735	0.000113089	0.000666945
	ENSMUSG00000018171.10	Vmp1	0.228341	6.64548	11.5473	0.00244318	0.00846881
	ENSMUSG00000018189.13	Uchl5	0.0292168	3.5937	0.148263	0.7037	0.790507
	ENSMUSG00000018196.19	Glrx2	-0.0717087	4.72232	1.87435	0.184059	0.289094
	ENSMUSG00000018199.10	Ro60	-0.268699	4.91504	2.61213	0.119538	0.206278
	ENSMUSG00000018209.16	Stk4	-0.663767	7.14023	132.816	4.29707e-11	7.13682e-09
	ENSMUSG00000018217.13	Pmp22	-0.0343879	9.12307	0.372426	0.547604	0.659735
	ENSMUSG00000018238.7	Gdf9	-0.372294	0.0598632	2.71688	0.11274	0.196647
	ENSMUSG00000018239.10	Zcchc10	-0.06678	2.70728	0.397378	0.534593	0.649399
	ENSMUSG00000018263.12	Tbx5	0.31692	6.07246	22.2723	9.13114e-05	0.000556026
	ENSMUSG00000018286.7	Psmb6	0.0935752	6.33874	6.30813	0.0194011	0.0474392
	ENSMUSG00000018287.13	Spag7	0.283562	5.46868	47.5597	4.6729e-07	7.42851e-06
	ENSMUSG00000018293.5	Pfn1	0.453731	8.49006	92.2625	1.46187e-09	8.91385e-08
	ENSMUSG00000018322.11	Tomm34	0.0986643	5.45561	4.14181	0.0533905	0.108039
	ENSMUSG00000018326.10	Ywhab	-0.00604472	8.33328	0.0294927	0.865132	0.910174
	ENSMUSG00000018334.19	Ksr1	0.296871	5.24189	24.193	5.54746e-05	0.000368963
	ENSMUSG00000018339.13	Gpx3	0.179293	10.1635	5.3923	0.0293293	0.0665288
	ENSMUSG00000018340.14	Anxa6	0.241055	8.05866	30.1674	1.33642e-05	0.000114685
	ENSMUSG00000018341.13	Il12rb2	-0.0164656	1.10342	0.00723567	0.93294	0.956413
	ENSMUSG00000018347.17	Zkscan6	-0.0860207	3.93195	1.80978	0.191509	0.298323
	ENSMUSG00000018362.15	Kpna2	0.74338	5.30273	91.1554	1.63688e-09	9.49255e-08
	ENSMUSG00000018363.17	Smurf2	-0.217556	7.0517	12.8865	0.00152898	0.00576391
	ENSMUSG00000018372.14	Cep95	-0.0541209	3.82497	0.506794	0.483612	0.602624
	ENSMUSG00000018377.11	Vezf1	-0.120194	6.79674	7.95567	0.0096386	0.026458
	ENSMUSG00000018378.14	Cuedc1	0.0704871	5.93941	1.17594	0.2893	0.40818
	ENSMUSG00000018379.18	Srsf1	0.00551945	7.59122	0.00596413	0.939103	0.960473
	ENSMUSG00000018381.16	Abi3	0.29113	6.14055	17.3026	0.000371209	0.0018027
	ENSMUSG00000018387.13	Shroom1	-0.183103	2.36195	2.4175	0.133493	0.225188
	ENSMUSG00000018395.20	Kif3a	-0.450001	4.38392	79.7487	5.62265e-09	2.39739e-07
	ENSMUSG00000018398.19	Septin8	0.0122775	6.9342	0.055419	0.81595	0.875221
	ENSMUSG00000018401.18	Mtmr4	0.0718014	5.90973	1.98074	0.172541	0.274864
	ENSMUSG00000018405.8	Mrm1	0.159933	3.29815	3.51871	0.0732905	0.139585
	ENSMUSG00000018411.18	Mapt	-0.397304	7.73887	88.1589	2.23549e-09	1.17778e-07
	ENSMUSG00000018412.17	Kansl1	-0.193021	6.44749	17.5688	0.000342747	0.00168847
	ENSMUSG00000018415.15	Gid4	-0.0905072	6.33685	2.12028	0.158731	0.257858
	ENSMUSG00000018417.15	Myo1b	-0.427401	8.10558	91.3059	1.61181e-09	9.43298e-08
	ENSMUSG00000018425.19	Dhx40	-0.122861	5.65357	9.33464	0.00556623	0.0168231
	ENSMUSG00000018427.9	Ypel2	-0.519774	4.61493	30.272	1.30552e-05	0.00011243
	ENSMUSG00000018428.16	Akap1	0.0072271	5.34432	0.0127153	0.911187	0.941976
	ENSMUSG00000018433.15	Nol11	0.107903	4.54703	7.58403	0.0112362	0.0300395
	ENSMUSG00000018442.14	Derl2	-0.0926318	5.61316	4.29287	0.0495424	0.10159
	ENSMUSG00000018446.9	C1qbp	0.209056	4.90646	15.7442	0.000599246	0.00265842
	ENSMUSG00000018449.13	Rpain	0.0871895	3.73538	1.96421	0.174272	0.276914
	ENSMUSG00000018451.8	6330403K07Rik	0.0540546	1.75899	0.127561	0.724196	0.805745
	ENSMUSG00000018459.16	Slc13a3	-0.0904838	2.15814	0.35706	0.555919	0.66685
	ENSMUSG00000018470.9	Kcnab3	-0.248765	0.347803	1.1496	0.294636	0.41408
	ENSMUSG00000018474.19	Chd3	-0.435307	7.62622	56.6838	1.11455e-07	2.45413e-06
	ENSMUSG00000018476.8	Kdm6b	0.23237	6.75854	16.1578	0.000526639	0.00239355
	ENSMUSG00000018481.10	Appbp2	-0.0967752	5.62394	3.53019	0.0728546	0.138869
	ENSMUSG00000018500.3	Adora2b	0.249794	3.59677	5.2844	0.0308331	0.0692733
	ENSMUSG00000018501.18	Ncor1	-0.22614	7.06694	30.5216	1.23484e-05	0.000107243
	ENSMUSG00000018507.17	Trpv2	0.422956	4.5273	40.0016	1.78279e-06	2.20185e-05
	ENSMUSG00000018509.9	Cenpv	0.134563	2.83471	2.03633	0.166872	0.267791
	ENSMUSG00000018537.17	Pcgf2	0.329043	5.10423	42.5296	1.11938e-06	1.50741e-05
	ENSMUSG00000018541.11	Cwc25	-0.00624365	4.71416	0.021522	0.947685	0.966246
	ENSMUSG00000018547.9	Pip4k2b	0.165652	5.84478	17.6885	0.000330729	0.00163759
	ENSMUSG00000018548.16	Trim37	-0.168146	4.7117	5.9019	0.0232489	0.0550642
	ENSMUSG00000018554.14	Ybx2	0.956138	0.963278	19.3714	0.000202633	0.0010863
	ENSMUSG00000018559.17	Ctdnep1	0.356949	6.248	76.1084	8.5846e-09	3.35666e-07
	ENSMUSG00000018565.18	Elp5	0.25097	4.78455	34.1709	5.6372e-06	5.70227e-05
	ENSMUSG00000018566.15	Slc2a4	0.288545	3.83144	0.770801	0.388951	0.51277
	ENSMUSG00000018567.15	Gabarap	0.0598277	7.83667	2.87169	0.103504	0.184053
	ENSMUSG00000018569.13	Cldn7	0.359886	5.25748	20.7196	0.000138916	0.000792979
	ENSMUSG00000018570.18	2810408A11Rik	-0.0902386	0.754384	0.23402	0.633083	0.733188
	ENSMUSG00000018572.11	Phf23	0.194976	5.7124	9.87886	0.00451776	0.0141955
	ENSMUSG00000018574.15	Acadvl	0.0337494	6.37892	0.142969	0.708777	0.794317
	ENSMUSG00000018581.16	Dnah11	-0.387826	3.99821	11.9754	0.00209847	0.00749841
	ENSMUSG00000018583.6	G3bp1	0.110952	6.89587	7.75194	0.0104808	0.028368
	ENSMUSG00000018585.10	Atox1	0.146158	5.33599	7.07589	0.0139137	0.0359682
	ENSMUSG00000018593.14	Sparc	0.395942	10.6764	6.75764	0.0159466	0.0402507
	ENSMUSG00000018599.6	Mief2	0.297143	4.16702	36.7189	3.36044e-06	3.71844e-05
	ENSMUSG00000018604.19	Tbx3	0.0468161	7.34813	0.428841	0.518984	0.634682
	ENSMUSG00000018648.16	Dusp14	-0.0168834	5.19927	0.120224	0.73191	0.811532
	ENSMUSG00000018651.15	Tada2a	-0.095991	3.79714	2.05388	0.165129	0.26585
	ENSMUSG00000018654.19	Ikzf1	0.221313	5.48467	7.90892	0.00982507	0.0268936
	ENSMUSG00000018659.13	Pnpo	-0.0439397	4.69119	0.444402	0.511567	0.627547
	ENSMUSG00000018661.18	Cog1	0.0748815	5.73463	2.97059	0.0980649	0.176323
	ENSMUSG00000018666.14	Cbx1	-0.0129336	5.902	0.137059	0.714573	0.798606
	ENSMUSG00000018669.15	Cdk5rap3	0.0711399	5.12957	1.79222	0.193599	0.30088
	ENSMUSG00000018672.16	Copz2	-0.0372424	4.45712	0.403936	0.53127	0.646532
	ENSMUSG00000018677.10	Slc25a39	0.240623	6.3222	20.075	0.000166134	0.000924446
	ENSMUSG00000018678.14	Sp2	0.392812	5.44184	80.5057	5.15884e-09	2.24352e-07
	ENSMUSG00000018697.15	Aatf	0.00568393	3.80637	0.00524897	0.942864	0.963343
	ENSMUSG00000018707.14	Dync1h1	-0.188073	8.39793	23.4952	6.6318e-05	0.000428024
	ENSMUSG00000018733.11	Pex12	-0.00531453	3.51763	0.00497416	0.944377	0.964153
	ENSMUSG00000018736.15	Ndel1	0.318914	6.29408	54.2364	1.60931e-07	3.22955e-06
	ENSMUSG00000018740.15	Slc25a35	-0.0571926	4.89303	0.402829	0.531828	0.647077
	ENSMUSG00000018750.15	Zbtb4	-0.229753	8.23605	48.4279	4.04492e-07	6.62341e-06
	ENSMUSG00000018752.20	Tnfsfm13	-0.0845449	4.42033	1.3562	0.256006	0.371793
	ENSMUSG00000018761.15	Mpdu1	0.243828	5.0941	25.389	4.11145e-05	0.000287258
	ENSMUSG00000018765.7	Fxr2	0.195326	6.55678	21.9998	9.81776e-05	0.00059059
	ENSMUSG00000018770.10	Atp5g3	0.194535	6.71543	15.4693	0.000653495	0.00285693
	ENSMUSG00000018774.14	Cd68	0.27064	5.76322	7.51983	0.0115407	0.0307359
	ENSMUSG00000018776.11	Slc35g3	-0.157354	0.563292	0.248661	0.622704	0.724391
	ENSMUSG00000018796.14	Acsl1	0.00287925	6.45222	0.000215144	0.988422	0.992349
	ENSMUSG00000018800.15	Abca5	-0.374561	5.3167	13.4236	0.00127414	0.00497307
	ENSMUSG00000018809.3	Smyd4	-0.170062	3.27631	6.1559	0.0207533	0.0500785
	ENSMUSG00000018819.11	Lsp1	0.329226	7.17823	31.528	9.89337e-06	8.94476e-05
	ENSMUSG00000018820.14	Zfyve27	-0.141632	5.8948	21.8095	0.000103308	0.000617978
	ENSMUSG00000018821.4	Avpi1	0.160277	5.07997	9.91896	0.00444957	0.0140247
	ENSMUSG00000018822.8	Sfrp5	0.664328	0.877787	1.94393	0.176423	0.279593
	ENSMUSG00000018830.11	Myh11	0.431835	7.44084	17.1943	0.000383508	0.00185109
	ENSMUSG00000018841.18	Rad51d	-0.295573	3.92963	17.4122	0.000359192	0.00175374
	ENSMUSG00000018845.15	Unc45b	0.0554246	5.64395	0.815899	0.375645	0.499127
	ENSMUSG00000018846.9	Pank3	-0.103005	5.879	1.40531	0.24781	0.363004
	ENSMUSG00000018848.5	Rars	0.181302	5.2626	13.0839	0.00142936	0.00545797
	ENSMUSG00000018849.7	Wwc1	-0.108458	7.87114	5.05386	0.034344	0.0756314
	ENSMUSG00000018858.16	Mrpl58	0.0335342	4.7942	0.508493	0.482888	0.602052
	ENSMUSG00000018861.9	Fdxr	-0.0835294	3.08256	1.40446	0.24795	0.363026
	ENSMUSG00000018868.5	Pnpla5	0.125624	0.148473	0.357757	0.555536	0.666437
	ENSMUSG00000018882.13	Mrpl45	-0.146934	4.19681	5.81064	0.0242257	0.0569523
	ENSMUSG00000018893.16	Mb	-0.629954	6.06276	5.06757	0.0341232	0.0752592
	ENSMUSG00000018899.18	Irf1	0.202718	7.41314	3.25845	0.0840231	0.155798
	ENSMUSG00000018900.8	Slc22a5	0.0506305	5.36932	0.43336	0.51681	0.632556
	ENSMUSG00000018906.15	P4ha2	0.193936	5.74423	12.5413	0.00172195	0.00636344
	ENSMUSG00000018909.16	Arrb1	-0.682055	8.62131	205.257	4.98154e-13	3.34127e-10
	ENSMUSG00000018916.6	Csf2	0.0652123	0.756605	0.114339	0.738292	0.816998
	ENSMUSG00000018920.12	Cxcl16	0.230928	6.43532	16.2493	0.000511908	0.00234063
	ENSMUSG00000018921.12	Pelp1	0.415003	4.97482	86.0674	2.79288e-09	1.39157e-07
	ENSMUSG00000018923.14	Med11	0.0937065	4.3363	1.57677	0.221699	0.333237
	ENSMUSG00000018924.7	Alox15	2.25864	2.15813	15.8437	0.000580826	0.00258988
	ENSMUSG00000018927.4	Ccl6	0.165191	6.94926	0.959737	0.337337	0.459165
	ENSMUSG00000018930.4	Ccl4	0.690824	0.73225	6.36039	0.0189598	0.0464773
	ENSMUSG00000018931.4	Natd1	0.14881	5.30683	7.15757	0.0134394	0.0348869
	ENSMUSG00000018932.10	Map2k3	0.201318	6.21337	19.9383	0.000172622	0.000955667
	ENSMUSG00000018965.12	Ywhah	0.3002	7.49311	22.2721	9.13159e-05	0.000556026
	ENSMUSG00000018974.8	Sart3	0.139251	5.52583	9.56069	0.00510138	0.015646
	ENSMUSG00000018983.10	E2f2	0.27805	5.26894	15.6668	0.000613998	0.00271076
	ENSMUSG00000018986.11	Slfn3	-0.7705	1.64244	19.6152	0.000189084	0.00102564
	ENSMUSG00000018995.13	Nars2	-0.000172232	2.83247	3.14314e-06	0.998601	0.999288
	ENSMUSG00000018999.15	Slc35b4	0.104258	5.43569	5.44077	0.0286805	0.0653461
	ENSMUSG00000019027.9	Dnah1	-0.47088	3.87397	15.8729	0.000575542	0.00257092
	ENSMUSG00000019039.15	Dalrd3	0.206873	6.09915	12.1782	0.00195408	0.00706702
	ENSMUSG00000019054.14	Fis1	0.0638777	6.3681	2.26245	0.146007	0.241439
	ENSMUSG00000019055.16	Plod1	0.300896	5.76552	14.7729	0.000816538	0.00344035
	ENSMUSG00000019066.14	Rab3d	-0.136243	6.5613	8.88084	0.00664651	0.0194477
	ENSMUSG00000019080.9	Mfsd3	0.30824	2.33325	8.75546	0.00698424	0.0202794
	ENSMUSG00000019082.19	Slc25a22	0.411345	5.64764	27.1299	2.695e-05	0.000203985
	ENSMUSG00000019087.14	Atp6ap1	0.140561	7.8624	15.9047	0.000569847	0.0025494
	ENSMUSG00000019088.15	Dnase1l1	-0.0689744	4.76884	1.192	0.286111	0.404761
	ENSMUSG00000019102.11	Aldh3a1	0.0444068	4.24895	0.0366049	0.849932	0.900211
	ENSMUSG00000019122.9	Ccl9	0.103599	4.09415	0.459479	0.504558	0.621002
	ENSMUSG00000019124.11	Scrn1	-0.188504	5.14278	14.9085	0.000781597	0.00332527
	ENSMUSG00000019132.12	BC005537	0.0399228	7.98306	0.419371	0.523594	0.639199
	ENSMUSG00000019139.11	Isyna1	0.577821	5.54638	68.2196	2.27317e-08	7.2339e-07
	ENSMUSG00000019143.16	Hars2	-0.0246489	4.86847	0.340267	0.565291	0.675907
	ENSMUSG00000019158.10	Tmem160	0.224753	4.27104	6.8331	0.0154364	0.0391955
	ENSMUSG00000019173.12	Rab5c	0.172874	7.69139	16.8063	0.000431394	0.00204154
	ENSMUSG00000019178.18	Styxl1	0.144663	0.866368	0.600925	0.446038	0.567688
	ENSMUSG00000019179.11	Mdh2	0.197196	6.99452	11.6321	0.00237021	0.00826518
	ENSMUSG00000019188.17	H13	0.121826	6.8481	9.71832	0.00480251	0.0149156
	ENSMUSG00000019189.14	Rnf145	0.0565463	7.13893	2.39515	0.135216	0.22749
	ENSMUSG00000019194.16	Scn1b	0.319573	3.5277	6.80779	0.0156055	0.0395386
	ENSMUSG00000019210.11	Atp6v1e1	0.0448873	6.49573	1.24088	0.276684	0.394497
	ENSMUSG00000019214.15	Chtf18	0.767453	1.47096	27.0679	2.73512e-05	0.000206216
	ENSMUSG00000019235.10	Rps6kl1	0.0185737	1.36594	0.0237312	0.8789	0.919731
	ENSMUSG00000019254.17	Ppp1r12c	0.287326	7.00099	60.3123	6.5997e-08	1.63249e-06
	ENSMUSG00000019256.18	Ahr	-0.858705	6.44199	52.1082	2.23676e-07	4.21697e-06
	ENSMUSG00000019261.4	Map1s	0.430346	5.62568	41.3767	1.38085e-06	1.78772e-05
	ENSMUSG00000019278.6	Dpep1	0.236903	7.43548	4.63302	0.0419711	0.0889564
	ENSMUSG00000019295.9	Tmem129	0.109204	5.14183	3.95095	0.0587455	0.116469
	ENSMUSG00000019297.10	Nop9	0.200865	4.37144	13.6168	0.00119412	0.0047071
	ENSMUSG00000019302.17	Atp6v0a1	-0.117618	7.11194	14.1459	0.00100179	0.00407517
	ENSMUSG00000019303.15	Psmc3ip	-0.000170468	2.18428	1.73023e-06	0.998962	0.999551
	ENSMUSG00000019312.11	Grb7	0.0527028	4.89724	0.498508	0.487171	0.605846
	ENSMUSG00000019320.15	Noxo1	-0.229339	3.05742	3.68098	0.0673953	0.130113
	ENSMUSG00000019326.15	Aoc3	0.453291	4.82303	1.62819	0.214553	0.325016
	ENSMUSG00000019338.14	Zfp687	-0.250845	5.3519	42.3823	1.14957e-06	1.53738e-05
	ENSMUSG00000019359.15	Gdpd2	0.0258454	3.81127	0.0367254	0.849689	0.900008
	ENSMUSG00000019362.9	D8Ertd738e	0.222267	5.8808	29.5358	1.54084e-05	0.000128445
	ENSMUSG00000019368.14	Sec14l4	-0.344913	6.42399	41.2527	1.4127e-06	1.81817e-05
	ENSMUSG00000019370.11	Calm3	0.274623	7.66552	42.5957	1.10612e-06	1.49219e-05
	ENSMUSG00000019373.12	Cops3	0.0292712	5.29929	0.474298	0.497831	0.615067
	ENSMUSG00000019428.17	Fkbp8	0.267742	7.66003	52.1567	2.21981e-07	4.19862e-06
	ENSMUSG00000019432.16	Ddx39b	0.0540189	7.79542	1.50505	0.232174	0.345514
	ENSMUSG00000019433.10	Gipc1	0.200008	5.51812	16.1358	0.000530249	0.00240494
	ENSMUSG00000019437.18	Tlcd1	0.234975	4.3111	8.81589	0.00681915	0.0198726
	ENSMUSG00000019461.13	Plscr3	0.209579	6.77188	13.9086	0.0010835	0.00434971
	ENSMUSG00000019464.7	Ptger1	-0.167571	4.31424	6.06444	0.0216159	0.051773
	ENSMUSG00000019467.16	Arhgef25	0.175281	5.44654	10.1374	0.00409729	0.0130938
	ENSMUSG00000019470.13	Xab2	0.0664922	5.96034	2.78027	0.108847	0.191349
	ENSMUSG00000019471.11	Cdc37	0.10485	7.14339	7.61283	0.0111025	0.0297642
	ENSMUSG00000019478.18	Rab4a	-0.0200049	2.81561	0.0383707	0.846403	0.897999
	ENSMUSG00000019487.12	Trip10	0.156023	6.01592	6.66779	0.0165785	0.0415391
	ENSMUSG00000019494.15	Cops6	0.156788	5.64521	8.75733	0.00697905	0.0202677
	ENSMUSG00000019505.8	Ubb	0.201559	10.2732	22.9576	7.62435e-05	0.000479485
	ENSMUSG00000019518.12	Ap4m1	-0.102047	5.25212	6.56122	0.0173642	0.0431114
	ENSMUSG00000019528.19	Gyg	-0.0799132	7.32368	0.951699	0.339328	0.461335
	ENSMUSG00000019539.12	Rcn3	0.322935	6.15559	28.9497	1.76125e-05	0.000143794
	ENSMUSG00000019558.15	Slc6a8	0.129418	5.95082	9.07891	0.006149	0.0182337
	ENSMUSG00000019564.13	Arid3a	-0.355823	3.84597	13.9551	0.00106694	0.00429607
	ENSMUSG00000019577.7	Pdk4	-0.0581156	5.06616	0.0245792	0.876773	0.918487
	ENSMUSG00000019578.12	Ubxn6	0.023672	5.88793	0.388723	0.53904	0.652927
	ENSMUSG00000019579.14	Mydgf	0.255602	5.14723	24.5456	5.0744e-05	0.000341669
	ENSMUSG00000019590.17	Cyb561	0.235123	6.98995	31.1625	1.07174e-05	9.54058e-05
	ENSMUSG00000019647.17	Sema6a	0.022227	6.64642	0.107189	0.746296	0.823036
	ENSMUSG00000019659.9	Ccdc12	0.0977956	5.42369	5.00789	0.0350965	0.076929
	ENSMUSG00000019689.5	Fmc1	-0.0496387	3.31094	0.655833	0.426246	0.548583
	ENSMUSG00000019699.17	Akt3	-0.359103	6.27359	56.1414	1.20788e-07	2.59731e-06
	ENSMUSG00000019710.14	Mrpl24	-0.0107786	6.01144	0.0648451	0.801234	0.864114
	ENSMUSG00000019715.15	Gle1	0.0220947	5.85491	0.219022	0.644143	0.743065
	ENSMUSG00000019718.9	L3hypdh	-0.0992299	2.3014	0.457287	0.505566	0.622024
	ENSMUSG00000019726.13	Lyst	-0.158736	5.20947	12.516	0.00173712	0.00641407
	ENSMUSG00000019731.14	Slc35e1	0.104041	6.1263	6.05731	0.0216848	0.0519238
	ENSMUSG00000019732.15	Calr3	-0.470949	0.463741	5.28943	0.0307612	0.0691384
	ENSMUSG00000019734.17	Tmc4	0.0637643	6.32429	1.43601	0.242857	0.357702
	ENSMUSG00000019737.15	Syne4	0.344263	2.71141	9.35516	0.00552217	0.0167131
	ENSMUSG00000019738.16	Polr2i	0.0485286	3.65809	0.662712	0.423863	0.546162
	ENSMUSG00000019761.11	Krt10	-0.402517	1.59607	9.47859	0.00526509	0.0160605
	ENSMUSG00000019762.5	Iyd	-0.121265	2.47821	0.970838	0.334614	0.456235
	ENSMUSG00000019763.12	Rmnd1	0.0772159	3.83295	1.11009	0.302888	0.423141
	ENSMUSG00000019767.13	Ccdc170	-0.744872	3.40882	47.5922	4.64755e-07	7.39495e-06
	ENSMUSG00000019768.17	Esr1	-0.464157	1.42817	3.42993	0.0767643	0.145006
	ENSMUSG00000019773.8	Fbxo5	0.535557	2.42401	28.5668	1.92363e-05	0.000154877
	ENSMUSG00000019774.9	Mtrf1l	-0.166569	2.68088	3.7211	0.0660227	0.127916
	ENSMUSG00000019775.18	Rgs17	0.367656	0.221128	2.63429	0.11806	0.203988
	ENSMUSG00000019777.17	Hdac2	0.0451929	5.62793	1.17564	0.289361	0.408233
	ENSMUSG00000019779.16	Frk	-0.0663463	2.7454	0.406271	0.530095	0.645193
	ENSMUSG00000019782.11	Rwdd1	-0.128743	4.78731	4.75676	0.0395473	0.0847424
	ENSMUSG00000019787.10	Trdn	-0.735357	1.97707	8.21401	0.0086761	0.0242355
	ENSMUSG00000019789.10	Hey2	0.197728	2.13939	3.5103	0.0736116	0.140082
	ENSMUSG00000019790.18	Stxbp5	-0.256634	5.15753	20.3178	0.000155253	0.000873371
	ENSMUSG00000019791.13	Hint3	-0.272147	2.82594	5.78178	0.0245441	0.0575688
	ENSMUSG00000019792.9	Trmt11	-0.135618	2.96332	2.2142	0.150184	0.247104
	ENSMUSG00000019794.14	Katna1	0.099563	4.48304	2.47194	0.129404	0.219714
	ENSMUSG00000019795.18	Pcmt1	0.164646	5.73162	18.854	0.000235034	0.00123419
	ENSMUSG00000019796.13	Lrp11	-0.0280587	2.50949	0.0676342	0.797102	0.861149
	ENSMUSG00000019797.12	Mtres1	-0.160467	3.1202	3.78186	0.0640039	0.124952
	ENSMUSG00000019802.14	Sec63	-0.162728	7.12797	12.6747	0.0016444	0.00612228
	ENSMUSG00000019804.13	Snx3	0.157693	7.10923	17.4009	0.000360412	0.00175811
	ENSMUSG00000019806.14	Aig1	0.0355229	5.08925	0.381432	0.54284	0.65608
	ENSMUSG00000019808.9	Adat2	-0.446059	1.40784	8.61271	0.0073919	0.0212158
	ENSMUSG00000019809.17	Pex3	-0.145086	4.5651	6.19306	0.0204139	0.0494167
	ENSMUSG00000019810.16	Fuca2	0.018665	5.97906	0.150785	0.701319	0.788543
	ENSMUSG00000019813.17	Cep57l1	0.0717657	2.25377	0.414431	0.526028	0.641587
	ENSMUSG00000019814.6	Ltv1	0.0820737	4.43543	1.45455	0.239929	0.354586
	ENSMUSG00000019817.19	Plagl1	-0.528646	5.17929	7.79327	0.0103036	0.0279535
	ENSMUSG00000019818.16	Cd164	0.168272	7.97162	2.72005	0.112542	0.196419
	ENSMUSG00000019820.12	Utrn	-0.416477	7.60244	71.8982	1.42888e-08	4.9487e-07
	ENSMUSG00000019822.13	Smpd2	0.156389	5.21137	9.12111	0.00604837	0.0179934
	ENSMUSG00000019823.18	Mical1	0.0907457	5.92232	3.51394	0.0734725	0.139848
	ENSMUSG00000019826.12	Zbtb24	0.126478	4.47232	8.85475	0.00671527	0.0196193
	ENSMUSG00000019831.15	Wasf1	0.785408	0.0471162	14.7909	0.000811804	0.00342288
	ENSMUSG00000019832.6	Rab32	0.127336	4.26631	2.34906	0.138853	0.232052
	ENSMUSG00000019837.9	Gtf3c6	0.0551548	4.59072	0.713818	0.406789	0.530194
	ENSMUSG00000019838.12	Slc16a10	-0.0742518	4.29065	1.08477	0.308343	0.428905
	ENSMUSG00000019841.16	Rev3l	-0.175218	5.13963	12.2719	0.00189106	0.00688164
	ENSMUSG00000019842.7	Traf3ip2	-0.0140554	4.59041	0.0663368	0.799013	0.862678
	ENSMUSG00000019843.15	Fyn	0.249414	6.11328	28.6578	1.88363e-05	0.000152288
	ENSMUSG00000019845.9	Tube1	0.180964	0.847889	0.880764	0.35764	0.480129
	ENSMUSG00000019846.12	Lama4	-0.259336	6.89286	18.1536	0.000288223	0.00145902
	ENSMUSG00000019848.15	Popdc3	-0.143755	3.5869	2.38333	0.136138	0.228566
	ENSMUSG00000019849.12	Prep	-0.0182872	6.73347	0.120391	0.731731	0.811472
	ENSMUSG00000019850.12	Tnfaip3	-0.184291	5.24431	5.76401	0.0247424	0.0578888
	ENSMUSG00000019851.9	Perp	0.247741	4.50159	7.12897	0.0136035	0.0352812
	ENSMUSG00000019852.8	Arfgef3	-0.126043	3.83042	1.63145	0.21411	0.324654
	ENSMUSG00000019853.7	Hebp2	-0.147526	0.841354	0.934671	0.343601	0.466018
	ENSMUSG00000019854.18	Reps1	0.116055	5.36478	11.7414	0.0022797	0.00800559
	ENSMUSG00000019856.15	Fam184a	-0.0536738	3.37451	0.329513	0.571458	0.681263
	ENSMUSG00000019857.8	Asf1a	0.0756614	3.7181	0.971846	0.334368	0.456049
	ENSMUSG00000019861.16	Gopc	-0.0130473	5.4787	0.0371075	0.848919	0.899465
	ENSMUSG00000019863.8	Qrsl1	0.215046	3.29514	7.79579	0.0102929	0.0279331
	ENSMUSG00000019864.15	Rtn4ip1	0.00185796	3.49784	0.000520765	0.981988	0.988507
	ENSMUSG00000019866.16	Crybg1	-0.106513	4.69261	1.54585	0.226141	0.338425
	ENSMUSG00000019868.17	Vta1	0.0872326	4.68066	6.06365	0.0304774	0.0685978
	ENSMUSG00000019872.14	Smpdl3a	0.117355	7.049	8.90849	0.00657447	0.019266
	ENSMUSG00000019873.9	Reep3	-0.242975	6.5209	12.6159	0.00167808	0.00622904
	ENSMUSG00000019876.16	Pkib	0.231214	2.23511	4.47709	0.0452669	0.0944744
	ENSMUSG00000019877.11	Serinc1	-0.0246002	7.81428	0.28416	0.599046	0.704482
	ENSMUSG00000019878.9	Hsf2	-0.00241013	3.85805	0.0015916	0.968518	0.980266
	ENSMUSG00000019880.11	Rspo3	-0.462557	1.46486	7.67489	0.0108203	0.0291196
	ENSMUSG00000019883.12	Echdc1	0.0375252	4.69247	0.0833461	0.775371	0.844799
	ENSMUSG00000019889.11	Ptprk	-0.259125	6.60674	21.0695	0.00012621	0.000732194
	ENSMUSG00000019891.16	Dcbld1	0.110249	4.0368	1.29262	0.267148	0.383661
	ENSMUSG00000019892.14	Lrriq1	-0.504554	1.64744	9.61849	0.00498949	0.0153812
	ENSMUSG00000019893.14	Ros1	-0.110116	1.22986	0.157127	0.69543	0.783943
	ENSMUSG00000019894.15	Slc6a15	-0.285468	2.1694	4.26182	0.050307	0.102801
	ENSMUSG00000019897.9	Ccdc59	-0.14811	5.14832	7.69677	0.0107227	0.0289104
	ENSMUSG00000019899.18	Lama2	0.150936	6.10875	3.12926	0.0900161	0.164572
	ENSMUSG00000019905.9	Gprc6a	0.610779	2.19539	13.279	0.00133781	0.00517411
	ENSMUSG00000019907.11	Ppp1r12a	-0.128132	6.60839	5.56968	0.0270318	0.0623429
	ENSMUSG00000019909.5	Fam162b	0.0588101	2.78825	0.167733	0.685883	0.776242
	ENSMUSG00000019916.15	P4ha1	0.0796874	6.68966	2.85575	0.104413	0.185291
	ENSMUSG00000019917.11	Septin10	-0.147515	4.53759	6.31416	0.0193497	0.0473532
	ENSMUSG00000019920.19	Lims1	-0.107725	7.35481	2.71895	0.11261	0.196499
	ENSMUSG00000019923.15	Zwint	0.151527	5.76047	9.47558	0.0052712	0.0160707
	ENSMUSG00000019927.7	Ube2d1	-0.0573154	4.75228	1.97172	0.173482	0.27586
	ENSMUSG00000019929.17	Dcn	0.155201	7.51765	1.74207	0.199725	0.307904
	ENSMUSG00000019942.14	Cdk1	1.52203	2.4501	34.4296	5.34299e-06	5.47453e-05
	ENSMUSG00000019943.11	Atp2b1	-0.381648	7.2153	37.8333	2.69915e-06	3.08703e-05
	ENSMUSG00000019944.15	Rhobtb1	-0.0607069	4.82024	0.936545	0.343127	0.465484
	ENSMUSG00000019945.11	Cabcoco1	0.110142	2.1902	1.10032	0.304977	0.425479
	ENSMUSG00000019947.11	Arid5b	-0.399876	6.79727	51.4526	2.48027e-07	4.58192e-06
	ENSMUSG00000019948.5	Actr6	-0.101647	2.57804	1.45038	0.240584	0.355287
	ENSMUSG00000019951.11	Uhrf1bp1l	-0.168026	5.89684	14.7714	0.000816927	0.00344116
	ENSMUSG00000019952.16	Poc1b	-0.0777184	4.41998	2.31149	0.141904	0.235974
	ENSMUSG00000019960.9	Dusp6	0.158739	6.52362	2.6454	0.117328	0.202983
	ENSMUSG00000019961.18	Tmpo	-0.000763389	6.77876	0.000317242	0.985941	0.991227
	ENSMUSG00000019966.19	Kitl	-0.309614	7.26355	6.94406	0.0147188	0.0376585
	ENSMUSG00000019969.15	Psen1	-0.0249947	6.21126	0.479649	0.495441	0.612896
	ENSMUSG00000019970.16	Sgk1	0.327052	6.72966	19.8169	0.000178615	0.000985717
	ENSMUSG00000019971.11	Cep290	-0.532856	3.58502	36.6075	3.43562e-06	3.79202e-05
	ENSMUSG00000019975.13	Ikbip	-0.215686	4.70965	13.0435	0.00144917	0.00551671
	ENSMUSG00000019977.17	Hbs1l	0.0193687	5.48235	0.306862	0.584901	0.692705
	ENSMUSG00000019978.17	Epb41l2	-0.214962	8.20774	24.4565	5.18959e-05	0.000347948
	ENSMUSG00000019979.13	Apaf1	-0.162591	4.85989	6.27032	0.0197276	0.0480841
	ENSMUSG00000019982.16	Myb	0.276144	3.92556	6.61778	0.0169422	0.0422925
	ENSMUSG00000019984.17	Med23	-0.208419	4.96838	12.9732	0.00148433	0.00562306
	ENSMUSG00000019986.18	Ahi1	-0.184079	3.43046	3.81123	0.0630532	0.123355
	ENSMUSG00000019987.10	Arg1	0.0703906	1.32544	0.112805	0.739985	0.818353
	ENSMUSG00000019988.8	Nedd1	0.0246824	4.14863	0.136903	0.714728	0.798677
	ENSMUSG00000019989.9	Enpp3	-0.0401314	1.77591	0.0700559	0.793588	0.858874
	ENSMUSG00000019990.16	Pde7b	-0.147729	4.82398	2.95041	0.0991472	0.177829
	ENSMUSG00000019992.9	Mtfr2	1.26752	-0.116382	16.7574	0.000437884	0.00206126
	ENSMUSG00000019996.18	Map7	-0.235286	5.43477	28.4243	1.98815e-05	0.000159522
	ENSMUSG00000019997.12	Ccn2	0.249915	7.80048	2.08902	0.161705	0.261642
	ENSMUSG00000019998.7	Stx7	-0.00151202	6.71915	0.000745544	0.97845	0.986664
	ENSMUSG00000020003.17	Pex7	0.0059936	4.44972	0.0140504	0.906662	0.938968
	ENSMUSG00000020009.14	Ifngr1	0.151182	7.6955	23.3965	6.80294e-05	0.000437128
	ENSMUSG00000020010.8	Vnn3	-0.0293288	3.20531	0.0533999	0.819271	0.87792
	ENSMUSG00000020014.19	Cfap54	-0.32788	3.55099	7.30292	0.012639	0.0331546
	ENSMUSG00000020015.11	Cdk17	-0.00912739	5.50021	0.0330534	0.857311	0.905002
	ENSMUSG00000020018.7	Snrpf	0.121335	3.95089	2.54123	0.124413	0.212855
	ENSMUSG00000020019.5	Ntn4	-0.363551	7.31116	83.1576	3.83463e-09	1.7738e-07
	ENSMUSG00000020020.9	Usp44	-0.695836	0.488834	13.6875	0.00116624	0.00461493
	ENSMUSG00000020021.5	Fgd6	-0.257517	5.22379	19.8101	0.000178959	0.00098699
	ENSMUSG00000020022.18	Ndufa12	0.158211	4.47837	3.82196	0.06271	0.122835
	ENSMUSG00000020023.19	Tmcc3	-0.541907	7.18468	54.4503	1.55772e-07	3.15507e-06
	ENSMUSG00000020024.8	Cep83	-0.119696	5.11239	2.8802	0.103022	0.183477
	ENSMUSG00000020027.19	Socs2	0.230298	6.75767	16.2792	0.000507194	0.00232212
	ENSMUSG00000020029.7	Nudt4	0.0774662	6.90799	2.35007	0.138772	0.231938
	ENSMUSG00000020032.15	Nuak1	-0.416188	5.82491	20.0265	0.000168406	0.000936
	ENSMUSG00000020034.8	Tcp11l2	-0.106595	6.27978	3.25633	0.084118	0.155924
	ENSMUSG00000020038.11	Cry1	0.469028	3.59174	14.2194	0.000977864	0.0040028
	ENSMUSG00000020042.16	Btbd11	0.252777	2.04308	2.97733	0.0977068	0.17586
	ENSMUSG00000020044.14	Timp3	-0.0803538	10.2562	2.58156	0.121611	0.209011
	ENSMUSG00000020048.14	Hsp90b1	-0.0283078	9.39127	0.296792	0.591088	0.697947
	ENSMUSG00000020052.10	Ascl1	0.113963	-0.128351	0.30175	0.588025	0.695366
	ENSMUSG00000020053.19	Igf1	0.224344	3.946	2.0206	0.168452	0.269756
	ENSMUSG00000020056.17	Washc3	-0.0509307	4.10177	0.767082	0.39008	0.513714
	ENSMUSG00000020057.3	Dram1	0.105278	8.44758	4.464	0.0455564	0.0949741
	ENSMUSG00000020062.8	Slc5a8	0.362514	0.37976	0.596929	0.447535	0.569136
	ENSMUSG00000020063.17	Sirt1	-0.069894	4.69369	0.414617	0.525936	0.641564
	ENSMUSG00000020064.10	Herc4	-0.0144012	5.3284	0.0450663	0.833732	0.888545
	ENSMUSG00000020067.9	Mypn	-0.426146	1.7528	2.95995	0.0986341	0.177127
	ENSMUSG00000020069.17	Hnrnph3	0.0382463	5.77416	0.539285	0.470071	0.58988
	ENSMUSG00000020070.19	Rufy2	-0.212678	4.45168	7.68906	0.0107569	0.0289894
	ENSMUSG00000020072.16	Pbld2	0.557653	1.88471	10.136	0.00409956	0.0130986
	ENSMUSG00000020074.8	Ccar1	-0.0733503	5.89	2.2583	0.146361	0.242002
	ENSMUSG00000020075.9	Ddx21	0.133452	6.22234	8.7342	0.00704335	0.0204171
	ENSMUSG00000020076.8	Ddx50	0.0808065	6.23504	5.7604	0.0247828	0.0579651
	ENSMUSG00000020077.15	Srgn	0.0432444	6.64121	0.327592	0.572573	0.681996
	ENSMUSG00000020078.17	Vps26a	-0.0348328	6.04287	0.714299	0.406633	0.53003
	ENSMUSG00000020079.16	Supv3l1	0.133047	3.78143	6.26403	0.0197825	0.0481759
	ENSMUSG00000020080.9	Hkdc1	0.390413	3.43236	18.0246	0.000299384	0.00150521
	ENSMUSG00000020083.14	Fam241b	-0.346467	3.09826	14.1663	0.000995091	0.0040546
	ENSMUSG00000020085.16	Aifm2	0.0130097	4.80064	0.0192017	0.890983	0.927578
	ENSMUSG00000020086.7	Macroh2a2	-0.126133	3.90082	3.98926	0.0576236	0.114714
	ENSMUSG00000020087.6	Tysnd1	0.418844	4.6245	38.1037	2.56098e-06	2.95678e-05
	ENSMUSG00000020088.11	Sar1a	0.141265	7.50778	19.2852	0.000207678	0.00110891
	ENSMUSG00000020089.9	Ppa1	0.357287	4.24009	9.58031	0.0050631	0.0155532
	ENSMUSG00000020091.16	Eif4ebp2	-0.000716595	8.12192	0.000306624	0.986179	0.991352
	ENSMUSG00000020092.10	Pald1	0.237652	6.81813	7.70656	0.0106793	0.0288107
	ENSMUSG00000020096.22	Tbata	-0.562855	2.25466	6.29637	0.019502	0.0476392
	ENSMUSG00000020097.15	Sgpl1	0.0174464	6.43349	0.235723	0.631856	0.732203
	ENSMUSG00000020098.8	Pcbd1	0.040611	2.48141	0.111142	0.741835	0.819411
	ENSMUSG00000020099.9	Unc5b	0.196949	5.10936	4.0042	0.0571926	0.113999
	ENSMUSG00000020100.16	Slc29a3	-0.223913	4.8639	9.20504	0.00585359	0.0175555
	ENSMUSG00000020101.15	Vsir	-0.187411	7.08459	6.56934	0.0173029	0.0430183
	ENSMUSG00000020102.16	Slc16a7	-0.136907	4.23053	1.48378	0.235401	0.349464
	ENSMUSG00000020105.10	Lrig3	-0.564818	3.99197	38.8136	2.23347e-06	2.64766e-05
	ENSMUSG00000020107.11	Anapc16	-0.0946068	5.42652	3.97737	0.0579691	0.115271
	ENSMUSG00000020108.5	Ddit4	0.882076	4.42696	20.41	0.000151331	0.000853512
	ENSMUSG00000020109.14	Dnajb12	0.135294	5.74548	9.51534	0.00519111	0.0158712
	ENSMUSG00000020111.16	Micu1	0.0326639	6.31879	0.668846	0.421756	0.544009
	ENSMUSG00000020114.13	Cand1	0.0451697	6.37933	1.83465	0.188596	0.29476
	ENSMUSG00000020115.4	Tbk1	0.0199402	5.59318	0.191016	0.666105	0.760579
	ENSMUSG00000020116.8	Pno1	0.207809	3.97585	10.6152	0.00342881	0.0112949
	ENSMUSG00000020120.16	Plek	-0.0528229	6.03462	0.266002	0.610896	0.714803
	ENSMUSG00000020121.16	Srgap1	-0.381219	4.57419	35.9582	3.91215e-06	4.1984e-05
	ENSMUSG00000020122.17	Egfr	-0.0919468	4.92873	1.41299	0.246559	0.36178
	ENSMUSG00000020123.7	Avpr1a	0.0136865	1.20771	0.00200772	0.964643	0.977195
	ENSMUSG00000020124.11	Usp15	0.0201467	5.78655	0.172941	0.681324	0.772738
	ENSMUSG00000020128.16	Vps54	-0.168323	6.08523	7.43455	0.0119594	0.0316528
	ENSMUSG00000020130.10	Tbc1d15	-0.126822	5.33415	6.36491	0.0189222	0.0463981
	ENSMUSG00000020131.15	Pcsk4	0.0260216	2.22284	0.0375995	0.847934	0.898913
	ENSMUSG00000020132.11	Rab21	0.0923588	6.5757	4.64816	0.0416657	0.0884168
	ENSMUSG00000020133.9	2310011J03Rik	0.26327	5.36156	40.4412	1.64195e-06	2.07342e-05
	ENSMUSG00000020134.14	Peli1	-0.102281	5.83786	5.01037	0.0350554	0.0768486
	ENSMUSG00000020135.14	Apc2	-0.327918	3.4168	6.15916	0.0207233	0.0500389
	ENSMUSG00000020137.6	Thap2	-0.118737	4.47288	2.71079	0.113123	0.197216
	ENSMUSG00000020140.16	Lgr5	0.291586	-0.399099	1.24126	0.276612	0.394461
[truncated: 15,440 more rows]

## Sheet: c DEGs BA.5 vs PBS 6dpi
	Ensembl_ID	HUGO_ID	logFC	logCPM	F	PValue	FDR	M1 BA.5	M2 BA.5	M3 BA.5	M4 BA.5	M5 BA.5	M6 BA.5	M1_PBS	M2_PBS	M3_PBS	M4_PBS	M5_PBS
BA.5 infected (mACE2-hACE2) versus PBS (C57BL/6J) at 6 dpi. Significant DEGs (EdgeR, FDR<0.0001) from lungs.	ENSMUSG00000067736.3	Gm10222	13.5865	5.19774	51.8472	4.11985e-06	4.39694e-05	13.293	85.9455	0	20.1117	129.41	96.5739	0	0	0	0	0
	ENSMUSG00000085543.2	Gm13568	5.23547	0.160754	80.7685	4.00529e-08	1.10345e-06	1.79635	3.15828	1.87864	2.77094	1.43709	3.06179	0	0	0.28169	0	0
	ENSMUSG00000029417.10	Cxcl9	3.43291	2.96367	78.2026	6.71707e-09	2.76924e-07	5.6046	19.2185	24.4223	22.0781	18.5385	10.6525	2.38013	1.37639	0.680751	0.949349	2.42949
	ENSMUSG00000086216.2	Gm13610	3.36889	2.66383	36.5755	9.63214e-06	8.75782e-05	10.0595	17.9417	17.584	13.6759	11.4249	11.2903	0	2.78271	2.62911	1.22857	0
	ENSMUSG00000027793.7	Ccna1	3.0246	0.181501	45.3742	6.775e-07	1.00382e-05	1.36522	3.89745	4.05785	4.55864	4.95798	1.59468	0.45577	0.388981	0.117371	0.763202	0.290482
	ENSMUSG00000028341.10	Nr4a3	2.77868	3.66924	179.797	1.97985e-12	8.63166e-10	30.466	22.0408	17.2083	11.5307	20.6942	22.0704	2.88654	1.97483	2.65258	3.38787	4.11957
	ENSMUSG00000074651.4	Mcidas	2.71557	0.6197	31.8817	9.16107e-06	8.42171e-05	2.94601	2.82229	3.60698	2.59217	3.95201	2.4877	0.405128	0.478746	0.352112	0.614285	0.448927
	ENSMUSG00000026285.9	Pdcd1	2.60417	0.192033	93.5294	1.28618e-09	8.09738e-08	3.30528	4.09904	2.55494	4.2011	2.15564	1.78604	0.582372	0.478746	0.352112	0.372294	0.686595
	ENSMUSG00000078926.9	Cdc20b	2.56763	-0.665797	39.2138	2.06916e-06	2.48342e-05	1.07781	1.54554	1.87864	1.51955	1.86822	0.574086	0.278526	0.269294	0.140845	0.241991	0.237667
	ENSMUSG00000053044.9	Cd8b1	2.4238	3.45342	134.618	3.75678e-11	6.61438e-09	31.472	39.7809	23.7459	26.8156	26.4425	16.202	5.51988	6.43314	5.28169	4.57921	3.77627
	ENSMUSG00000047293.8	Gpr15	2.39541	-0.109083	61.9102	5.27816e-08	1.37382e-06	2.87415	3.49427	2.25436	3.0391	1.72451	1.27575	0.303846	0.478746	0.56338	0.446752	0.501742
	ENSMUSG00000034855.14	Cxcl10	2.29836	5.82356	34.137	5.6771e-06	5.73931e-05	5.89202	14.4475	16.6071	12.6927	16.1673	7.71826	2.30417	2.78271	2.20657	1.61948	3.69705
	ENSMUSG00000050232.7	Cxcr3	2.27499	2.72579	130.307	5.19487e-11	8.16156e-09	16.4545	21.3688	17.2834	20.201	17.1733	9.69567	5.21603	2.45357	3.70892	2.97835	3.1689
	ENSMUSG00000028175.16	Depdc1a	2.27474	-0.47593	37.732	2.75296e-06	3.13784e-05	1.43708	3.29268	1.12718	1.69832	1.50895	1.72226	0.227885	0.418902	0.328638	0.670129	0.158445
	ENSMUSG00000085105.3	Gm12758	2.24874	4.80491	161.562	5.94654e-12	1.95664e-09	32.6935	43.544	53.5787	54.6143	34.9933	49.2438	8.27981	7.65993	9.85915	11.2619	9.79718
	ENSMUSG00000015437.6	Gzmb	2.14716	3.45708	96.7995	9.30108e-10	6.2856e-08	24.071	24.2583	19.6129	24.3128	23.8558	14.097	4.83622	4.99691	5.02347	4.39307	5.22868
	ENSMUSG00000062380.5	Tubb3	2.13085	0.184353	31.2439	1.05277e-05	9.40051e-05	2.15562	2.48631	1.95378	4.2011	2.29935	0.893022	0.557052	0.56851	0.422535	0.837661	0.184852
	ENSMUSG00000053977.14	Cd8a	2.08821	3.88087	132.162	4.51356e-11	7.31508e-09	31.2564	47.5086	30.6593	34.2345	34.7058	23.3461	9.29263	9.93397	7.53521	7.11081	5.73042
	ENSMUSG00000030167.16	Klrc1	2.07318	0.705722	41.8021	1.27737e-06	1.68248e-05	4.23938	5.3086	3.00582	2.32401	4.16758	3.57209	0.582372	0.957491	1.00939	1.35887	0.52815
	ENSMUSG00000024401.15	Tnf	2.02541	2.14738	51.162	2.59729e-07	4.75778e-06	3.7364	8.19809	9.24288	8.13405	6.32322	2.61528	2.05096	1.70553	1.05634	1.19134	1.82212
	ENSMUSG00000073437.12	D330041H03Rik	2.00712	5.13904	202.459	5.75226e-13	3.65241e-10	60.4291	54.3627	68.5326	65.6981	48.2864	51.285	17.1926	13.2253	19.2019	12.2485	10.2725
	ENSMUSG00000046828.4	Mettl21e	1.92266	0.479792	52.3868	2.14124e-07	4.06765e-06	2.73045	2.82229	1.80349	1.7877	3.23346	2.55149	0.633013	0.388981	0.539906	1.00519	0.660187
	ENSMUSG00000041431.17	Ccnb1	1.90476	1.98064	49.086	3.63013e-07	6.0696e-06	8.26319	12.0955	8.71687	8.67036	7.47289	6.12358	2.12692	2.27404	2.06573	2.47575	2.4559
	ENSMUSG00000020893.18	Per1	1.89549	6.97685	149.282	1.32882e-11	3.40784e-09	220.16	198.165	140.597	168.223	206.367	131.721	49.0965	33.602	44.061	51.7116	59.945
	ENSMUSG00000028718.17	Stil	1.88369	1.13212	54.5222	1.5408e-07	3.12443e-06	3.88011	6.31656	4.43358	4.64803	4.38314	2.80664	0.835577	0.897648	1.52582	1.73117	0.897854
	ENSMUSG00000114759.2	Gm10257	1.8453	-0.045452	42.8219	1.06201e-06	1.44578e-05	1.07781	1.94873	1.6532	1.51955	2.65863	2.29634	0.379808	0.777962	0.56338	0.390908	0.501742
	ENSMUSG00000086596.3	Susd5	1.8268	0.390316	67.8807	2.37476e-08	7.48888e-07	2.94601	1.94873	1.72834	3.48602	2.08379	1.91362	0.93686	0.598432	0.586854	0.670129	0.475335
	ENSMUSG00000004612.10	Nkg7	1.82646	3.66006	146.302	1.62924e-11	3.70214e-09	25.1488	32.5908	26.376	27.9776	25.3647	19.1362	7.11507	7.8993	8.21596	7.18527	6.3378
	ENSMUSG00000042417.6	Ccno	1.81013	2.3259	33.3003	6.76414e-06	6.57891e-05	6.5387	9.07166	9.61861	7.77651	11.4968	6.05979	2.25353	2.24412	2.46479	2.77359	2.21823
	ENSMUSG00000111254.2	Gm48717	1.79639	-0.54596	32.4803	8.0526e-06	7.58494e-05	1.50893	2.08312	1.35262	1.16201	0.862257	0.510298	0.253205	0.388981	0.328638	0.428138	0.369705
	ENSMUSG00000040204.7	Pclaf	1.76016	2.37302	90.6686	1.72091e-09	9.68096e-08	12.1433	15.5898	8.56658	10.0111	11.6405	7.39932	2.75994	3.20161	3.07512	4.22553	2.74638
	ENSMUSG00000020897.13	Aurkb	1.74681	2.10156	62.0676	5.16449e-08	1.34826e-06	7.97578	11.2892	7.21396	10.8156	7.90402	5.42192	2.15224	1.97483	2.55868	3.18311	2.58793
	ENSMUSG00000015880.14	Ncapg	1.74365	1.25401	40.8508	1.52156e-06	1.93965e-05	5.74831	6.98854	3.90756	3.84356	5.67652	3.82724	0.93686	1.07718	1.59624	2.56883	1.18834
	ENSMUSG00000020649.12	Rrm2	1.72643	3.16295	104.433	4.51314e-10	3.68425e-08	16.4545	20.092	17.6592	22.0781	18.323	12.1834	4.78558	4.96699	5.07042	6.55237	5.36072
	ENSMUSG00000005696.12	Sh2d1a	1.72552	0.387543	45.8331	6.26038e-07	9.42787e-06	3.44898	4.50223	2.85553	1.87709	3.08975	1.78604	0.96218	0.897648	0.84507	0.707358	1.02989
	ENSMUSG00000028873.17	Cdca8	1.72409	1.83742	53.609	1.7716e-07	3.47135e-06	5.67645	10.4156	7.2891	8.13405	6.68249	4.78405	2.07628	1.7953	2.41784	2.32684	2.16541
	ENSMUSG00000032218.8	Ccnb2	1.71878	2.32363	58.3694	8.71155e-08	2.00953e-06	11.1373	12.5659	11.347	10.905	8.83813	5.42192	2.75994	3.50083	2.723	3.46233	2.74638
	ENSMUSG00000001403.14	Ube2c	1.70541	1.88964	43.076	1.01473e-06	1.39424e-05	6.68241	11.558	7.81512	7.06143	6.89806	5.0392	2.60801	1.73545	2.32394	2.55021	2.24464
	ENSMUSG00000028678.14	Kif2c	1.70132	1.16633	33.6705	6.25754e-06	6.18975e-05	3.80825	5.57739	3.83242	3.84356	5.96394	2.55149	1.19006	1.16694	1.12676	1.50779	1.53163
	ENSMUSG00000030867.8	Plk1	1.69574	2.33384	80.4682	5.18083e-09	2.24748e-07	9.341	12.2971	10.9712	10.1005	9.98781	6.31494	2.98782	2.72287	3.38028	3.05281	2.98405
	ENSMUSG00000051378.11	Kif18b	1.6938	1.27398	42.202	1.18774e-06	1.58477e-05	4.23938	5.3086	4.73416	5.72065	6.39507	3.31694	1.26603	1.526	1.29108	2.34545	1.13552
	ENSMUSG00000023036.15	Pcdhgc4	1.67119	6.43421	119.146	1.25697e-10	1.5014e-08	99.6613	128.616	166.297	119.776	133.147	104.165	42.26	35.6366	43.2394	42.2181	33.115
	ENSMUSG00000002068.17	Ccne1	1.66272	1.00817	68.0649	2.31893e-08	7.36609e-07	4.09567	4.43503	3.75727	4.46926	4.45499	2.23255	1.01282	1.34647	1.40845	1.20995	1.16193
	ENSMUSG00000075256.10	Cerkl	1.65966	2.22838	41.1488	1.44e-06	1.84784e-05	7.97578	11.1548	11.7978	6.34635	7.83217	5.23056	3.16507	2.78271	3.94366	1.30303	2.13901
	ENSMUSG00000024791.11	Cdca5	1.64966	0.928014	43.7049	9.07246e-07	1.28109e-05	3.59269	4.50223	3.60698	4.11172	3.8083	2.93421	0.759616	1.07718	1.24413	1.73117	1.10911
	ENSMUSG00000056290.17	Ms4a4b	1.61642	4.47201	106.058	3.89096e-10	3.30998e-08	42.0345	54.1611	35.6941	38.6144	42.538	29.5973	13.0148	15.1104	13.8263	13.2164	10.8007
	ENSMUSG00000042345.16	Ubash3a	1.6077	1.32527	66.5043	2.84111e-08	8.51307e-07	5.24533	6.31656	4.35843	6.25696	5.2454	3.69966	1.89904	1.64569	1.64319	1.82424	1.45241
	ENSMUSG00000017716.16	Birc5	1.60729	2.42673	44.5152	7.86612e-07	1.1384e-05	9.26915	16.665	9.54347	10.8156	12.4309	4.78405	2.93718	3.02208	3.73239	3.68571	3.93472
	ENSMUSG00000068227.10	Il2rb	1.58849	4.99323	138.126	2.90483e-11	5.33235e-09	58.8483	71.2293	54.6307	66.8601	58.9209	38.6551	20.0792	19.5388	17.9108	20.532	18.5381
	ENSMUSG00000020914.18	Top2a	1.58634	4.15561	47.4708	4.7429e-07	7.52532e-06	32.9091	43.6783	38.1739	32.715	35.7837	22.5807	8.71026	11.6096	11.6432	14.1285	10.8799
	ENSMUSG00000037544.15	Dlgap5	1.58483	1.54456	66.2019	2.95636e-08	8.75314e-07	5.31718	7.05573	6.08678	4.91618	6.46693	4.78405	1.79776	1.58584	2.11267	2.01039	2.08619
	ENSMUSG00000049109.16	Themis	1.58311	1.53828	109.381	2.88984e-10	2.69497e-08	6.68241	7.7949	4.65901	5.18434	5.82023	5.61328	1.92436	1.91498	2.13615	2.08484	1.87493
	ENSMUSG00000001444.3	Tbx21	1.5797	2.28522	89.5251	1.93735e-09	1.0558e-07	8.69432	11.1548	9.46832	10.3687	9.12555	6.82524	3.46891	2.15436	3.05164	3.66709	3.06327
	ENSMUSG00000005470.9	Asf1b	1.57584	2.28232	71.0866	1.5805e-08	5.38327e-07	8.04763	13.2379	9.46832	10.1005	9.77225	5.29434	2.98782	3.56067	3.21596	3.14588	2.69356
	ENSMUSG00000021965.4	Ska3	1.57411	0.39177	40.506	1.62225e-06	2.05151e-05	1.94005	3.76306	2.85553	2.4134	2.65863	1.91362	0.96218	0.538589	0.727699	0.930734	1.16193
	ENSMUSG00000059430.15	Actg2	1.55699	4.67023	106.699	3.67202e-10	3.18589e-08	40.9567	33.5315	29.5321	40.4915	42.7536	34.4451	13.9263	12.4474	12.6526	12.3974	11.3024
	ENSMUSG00000022385.12	Gtse1	1.54182	1.28105	57.86	9.37991e-08	2.13546e-06	3.37713	5.3086	4.88445	4.73741	4.45499	2.80664	1.44327	1.64569	1.24413	1.58225	1.37319
	ENSMUSG00000038128.8	Camk4	1.5398	-0.346403	43.1807	9.95917e-07	1.37401e-05	0.574831	1.81433	1.87864	1.60893	1.50895	1.72226	0.430449	0.388981	0.469483	0.651514	0.63378
	ENSMUSG00000066170.9	E230001N04Rik	1.53701	-0.43257	32.1123	8.71543e-06	8.08449e-05	1.8682	1.74713	0.901745	1.34078	1.36524	0.765447	0.48109	0.508667	0.492957	0.428138	0.369705
	ENSMUSG00000023940.15	Sgo1	1.53649	0.496112	34.9642	4.78651e-06	4.98936e-05	2.51488	4.09904	3.23125	2.86033	2.80234	2.10498	0.987501	0.718118	1.33803	1.09827	0.871447
	ENSMUSG00000022322.9	Shcbp1	1.53253	0.693598	41.2586	1.41117e-06	1.81753e-05	3.52084	4.90541	3.15611	3.48602	2.80234	2.10498	0.683654	1.01733	1.38498	1.5264	1.08271
	ENSMUSG00000001228.15	Uhrf1	1.5239	3.23329	65.8993	3.0768e-08	9.04404e-07	14.0115	24.4599	16.532	20.9161	16.5266	12.8212	4.6843	6.25361	6.71361	7.18527	5.54557
	ENSMUSG00000019942.14	Cdk1	1.52203	2.4501	34.4296	5.34299e-06	5.47453e-05	7.18538	11.4236	11.347	11.2625	10.2752	6.12358	2.9625	2.81263	3.80281	3.62986	3.40657
	ENSMUSG00000027715.10	Ccna2	1.51854	3.01268	58.0776	9.08775e-08	2.07708e-06	18.1072	20.6968	13.0002	14.9273	16.4547	10.0784	5.06411	5.65518	5.28169	6.66406	4.38364
	ENSMUSG00000048327.7	Ckap2l	1.51089	2.51982	40.0359	1.77133e-06	2.19337e-05	9.12544	12.2299	11.0464	10.5475	11.1375	7.0166	3.19039	3.53075	3.38028	4.35584	3.32734
	ENSMUSG00000120878.1	ENSMUSG00000120878.1	1.51036	1.36193	39.5191	1.95265e-06	2.36638e-05	3.30528	4.09904	2.55494	5.09495	3.66459	2.93421	1.31667	0.987413	1.07981	1.84285	1.00348
	ENSMUSG00000046591.11	Ticrr	1.50231	0.37711	49.677	3.29683e-07	5.69242e-06	2.58674	2.6879	2.10407	3.39664	2.65863	1.84983	0.784936	0.807883	0.798121	1.2658	0.765817
	ENSMUSG00000032011.6	Thy1	1.49084	5.20166	90.1665	1.81254e-09	1.00559e-07	73.9376	90.5822	67.4054	78.212	67.6153	40.5049	29.9035	25.583	23.5915	23.864	20.9675
	ENSMUSG00000021697.13	Depdc1b	1.47858	-0.0506296	31.7685	9.38887e-06	8.59037e-05	1.94005	2.01592	1.72834	2.14524	2.58677	1.21196	0.734295	0.478746	0.586854	1.02381	0.580965
	ENSMUSG00000000409.15	Lck	1.46976	4.36102	116.031	1.62883e-10	1.8326e-08	35.8551	47.2398	37.1218	42.458	38.4423	24.6219	15.6228	14.2128	13.169	13.9238	10.8799
	ENSMUSG00000021485.15	Mxd3	1.4648	0.873519	35.6021	4.2036e-06	4.47264e-05	2.87415	4.97261	3.38154	4.46926	3.52088	2.61528	1.24071	1.34647	1.50235	1.60086	0.845039
	ENSMUSG00000031431.14	Tsc22d3	1.45633	7.83921	63.5157	4.23481e-08	1.14497e-06	432.632	415.751	221.003	270.211	320.041	177.775	96.5978	97.9334	119.624	127.678	116.008
	ENSMUSG00000076928.6	Trac	1.45591	3.30654	72.712	1.29258e-08	4.61924e-07	18.8976	24.0567	18.5609	18.5027	20.263	12.5023	7.34295	7.65993	6.76056	5.9567	6.57546
	ENSMUSG00000027469.17	Tpx2	1.45447	2.79996	58.4926	8.55787e-08	1.98439e-06	11.2811	16.5978	11.1967	14.5698	13.365	7.97341	3.97532	4.4284	4.8122	5.23073	4.2516
	ENSMUSG00000002055.10	Spag5	1.45041	2.07666	37.2077	3.0509e-06	3.43255e-05	6.39499	9.40764	7.66483	8.22344	9.48483	6.63388	2.68398	2.84255	2.69953	3.72294	2.56153
	ENSMUSG00000022596.4	Slurp1	1.4384	1.26327	40.8333	1.5265e-06	1.94454e-05	4.59865	3.15828	4.65901	4.29049	3.0179	4.33754	1.82308	1.37639	2.11267	1.04242	1.02989
	ENSMUSG00000024989.16	Cep55	1.41726	1.40096	35.4465	4.33828e-06	4.59911e-05	5.17348	6.51815	4.20814	3.84356	4.02387	3.89102	1.44327	1.64569	1.83098	2.19653	1.47882
	ENSMUSG00000076490.7	Trbc1	1.41717	3.10515	96.7226	9.37127e-10	6.2856e-08	17.9635	21.3688	11.6475	16.2681	17.1014	10.2698	5.74776	6.40322	6.43192	5.97531	4.9382
	ENSMUSG00000012443.5	Kif11	1.41348	2.78947	56.557	1.13565e-07	2.48621e-06	12.7181	16.1946	10.8961	12.6033	11.856	9.37673	3.46891	4.27879	5.75117	4.93289	4.54209
	ENSMUSG00000024669.9	Cd5	1.41262	2.62428	83.2546	3.79378e-09	1.76426e-07	10.8499	13.9771	8.9423	14.1229	13.5087	9.44052	4.70962	4.54808	3.92018	4.02077	4.96461
	ENSMUSG00000024222.18	Fkbp5	1.41119	4.68143	95.0793	1.10177e-09	7.16931e-08	43.6153	37.4962	30.1333	39.0613	42.6099	22.3255	15.4962	12.6568	13.6854	13.5701	11.8834
	ENSMUSG00000023015.15	Racgap1	1.40371	3.4653	60.457	6.46633e-08	1.60865e-06	18.3946	25.4006	21.2661	21.7206	18.323	13.4591	6.7859	6.88197	7.41784	9.1212	6.97158
	ENSMUSG00000000791.10	Il12rb1	1.40312	1.18581	75.9541	8.74303e-09	3.38822e-07	3.59269	4.56943	3.98271	4.55864	3.37717	2.74285	1.41795	1.31655	1.40845	1.37749	1.63726
	ENSMUSG00000001349.6	Cnn1	1.39895	5.55026	62.0944	5.14537e-08	1.3473e-06	79.6141	57.3866	49.0699	69.1841	79.6151	57.7275	30.1567	25.4334	26.5258	21.258	20.7035
	ENSMUSG00000026012.3	Cd28	1.39579	2.58053	66.2741	2.92839e-08	8.69556e-07	11.8559	14.9178	8.04056	11.7095	14.0117	9.69567	4.05128	4.45832	5.25821	4.6909	3.74986
	ENSMUSG00000046179.18	E2f8	1.39439	1.62714	48.914	3.73388e-07	6.21921e-06	5.67645	6.24936	4.9596	5.81004	6.25136	3.76345	2.22821	1.70553	1.92488	2.6619	1.7693
	ENSMUSG00000039977.17	Deup1	1.37286	2.44228	44.2461	8.24629e-07	1.18262e-05	8.55061	9.34045	10.3701	8.22344	11.353	5.996	3.11443	3.53075	3.42723	3.72294	3.48579
	ENSMUSG00000024670.18	Cd6	1.36736	2.79157	69.9866	1.81454e-08	5.98182e-07	11.4966	17.2025	13.2256	13.8547	13.2213	7.59069	6.12757	4.60793	4.15493	5.06319	4.72694
	ENSMUSG00000086714.3	0610009E02Rik	1.35991	4.34386	68.6718	2.1449e-08	6.93967e-07	26.6578	26.543	24.4223	29.0502	31.0412	32.2126	11.0144	15.2899	11.2676	9.73548	8.02788
	ENSMUSG00000087651.4	1500009L16Rik	1.3545	0.881768	51.3323	2.528e-07	4.66023e-06	4.31123	4.03185	2.63009	3.66479	3.08975	2.29634	1.44327	0.807883	1.17371	1.56363	1.47882
	ENSMUSG00000060969.10	Irx1	1.34618	6.39288	215.737	2.951e-13	3.21641e-10	115.11	124.181	96.5618	120.134	122.872	113.222	42.9183	39.1973	44.4601	49.664	50.4647
	ENSMUSG00000076498.3	Trbc2	1.34064	3.73389	70.855	1.6269e-08	5.46657e-07	22.2747	31.7844	23.3702	25.6535	23.3528	15.883	10.2801	10.4426	9.01408	8.41384	8.68806
	ENSMUSG00000030742.8	Lat	1.32258	3.51563	111.118	2.48107e-10	2.43075e-08	21.9154	25.535	20.8904	23.1508	22.275	13.1402	8.98879	8.10875	9.31924	7.81817	7.97506
	ENSMUSG00000031004.9	Mki67	1.32012	4.73008	38.3687	2.43299e-06	2.83805e-05	42.9686	62.292	48.0931	51.3965	49.5079	30.3627	15.9013	18.2522	19.507	21.7233	19.4095
	ENSMUSG00000027323.11	Rad51	1.32008	1.41686	45.2198	6.95825e-07	1.02748e-05	4.09567	5.64459	4.80931	5.63127	4.45499	3.38073	1.54455	1.76537	1.73709	2.38268	1.84852
	ENSMUSG00000031821.12	Gins2	1.31456	5.25507	147.037	1.54877e-11	3.6012e-09	51.6629	57.3866	55.9833	59.6199	57.1964	52.3694	26.46	23.8475	24.1314	22.5982	14.841
	ENSMUSG00000120697.1	ENSMUSG00000120697.1	1.31113	-0.329053	34.5862	5.17306e-06	5.33805e-05	1.29337	2.01592	0.97689	1.51955	1.5808	1.14817	0.658334	0.658275	0.399061	0.614285	0.52815
	ENSMUSG00000035455.13	Fignl1	1.30964	1.61664	51.4875	2.46657e-07	4.5663e-06	4.38308	7.19013	4.43358	5.09495	5.89209	4.97541	1.31667	1.82522	2.93427	2.51298	2.1126
	ENSMUSG00000049932.4	H2ax	1.30896	4.03637	98.8217	7.64558e-10	5.48688e-08	23.2806	30.2389	28.405	30.3016	27.3048	21.7515	11.5968	8.52766	11.8075	11.6342	10.4838
	ENSMUSG00000022548.15	Apod	1.3087	5.64481	33.7942	6.09756e-06	6.06591e-05	22.8495	27.0806	23.0696	26.0111	32.1909	14.097	10.6853	8.70719	8.52112	8.58137	12.3323
	ENSMUSG00000079553.12	Kifc1	1.29735	1.84493	32.0174	8.89589e-06	8.22127e-05	5.02977	8.39968	4.73416	7.59774	5.60467	4.33754	2.22821	1.85514	2.51174	3.10865	2.29745
	ENSMUSG00000024910.6	Ctsw	1.28314	3.09965	89.9545	1.85279e-09	1.0225e-07	13.7959	18.6809	14.8036	15.9106	14.2272	10.3335	7.41891	6.25361	5	6.03116	5.3079
	ENSMUSG00000026669.15	Mcm10	1.2561	1.39143	43.9662	8.66279e-07	1.23524e-05	3.80825	4.83822	3.45669	4.64803	4.31128	3.38073	1.13942	2.09451	1.76056	1.82424	1.69008
	ENSMUSG00000072082.8	Ccnf	1.25099	2.08606	53.8729	1.70126e-07	3.3714e-06	7.11353	10.2812	6.38736	8.04467	7.11362	5.93222	2.65866	2.9024	3.49765	3.68571	2.90482
	ENSMUSG00000032094.9	Cd3d	1.25039	2.74454	43.0725	1.01536e-06	1.39424e-05	11.1373	13.7083	11.7227	13.8547	12.9339	7.33554	5.14007	5.6851	4.88263	4.43029	4.5949
	ENSMUSG00000030376.9	Slc8a2	1.24759	0.223821	55.512	1.32696e-07	2.76804e-06	1.07781	1.54554	1.87864	1.96647	1.86822	1.46711	0.835577	0.538589	0.704225	0.688743	0.63378
	ENSMUSG00000032093.8	Cd3e	1.2456	3.10828	56.0835	1.21833e-07	2.61334e-06	18.3227	18.8153	12.925	14.4804	15.4488	10.0784	7.79872	6.40322	6.31455	5.60302	5.54557
	ENSMUSG00000037466.14	Tedc1	1.24317	1.82536	86.463	2.67684e-09	1.34142e-07	5.6046	6.78694	6.08678	6.52512	6.10765	4.5289	2.07628	2.72287	2.60563	2.92251	2.16541
	ENSMUSG00000028071.13	Sh2d2a	1.22919	3.17915	66.7761	2.74166e-08	8.30881e-07	14.0115	18.6137	13.0753	18.1452	18.1074	10.2698	7.21635	6.88197	6.52582	6.81297	5.25509
	ENSMUSG00000023067.15	Cdkn1a	1.21287	6.68991	143.12	2.03345e-11	4.12341e-09	139.468	144.542	141.875	120.134	136.596	119.091	58.3891	48.2935	57.5352	58.7479	65.2001
	ENSMUSG00000058914.13	C1qtnf3	1.21059	1.38452	31.7038	9.52162e-06	8.67089e-05	2.15562	4.63662	3.15611	4.55864	4.67056	5.74086	1.44327	1.76537	1.80751	2.06623	1.87493
	ENSMUSG00000035042.3	Ccl5	1.189	4.653	66.3264	2.90832e-08	8.66976e-07	32.9091	45.7615	31.8616	45.7652	42.538	26.6631	19.2436	14.9608	14.9296	16.5857	16.5311
	ENSMUSG00000074874.11	Ctla2b	1.18567	3.06759	75.7746	8.9313e-09	3.43826e-07	9.41285	12.9691	14.9539	8.58098	12.359	9.63188	4.91218	4.93706	5.18779	5.56579	4.2516
	ENSMUSG00000030677.9	Kif22	1.17145	2.37578	67.4691	2.50483e-08	7.77254e-07	8.47875	10.6172	9.7689	9.92175	9.55668	6.57009	3.34231	4.27879	4.29577	4.28138	4.06675
	ENSMUSG00000006310.11	Zbtb32	1.16344	1.92565	47.8631	4.44218e-07	7.12014e-06	7.54465	9.20605	5.10989	6.16758	6.68249	4.0186	3.06378	2.81263	2.95774	2.94112	2.61434
	ENSMUSG00000027368.7	Dusp2	1.16276	2.33036	58.7534	8.24209e-08	1.92415e-06	7.04168	8.66847	7.58969	8.75975	6.68249	5.35813	4.07661	3.3213	2.48826	3.31341	3.1689
	ENSMUSG00000062248.6	Cks2	1.15719	1.79244	50.0793	3.08903e-07	5.39235e-06	4.09567	7.19013	5.56076	4.2011	5.31725	5.23056	1.8484	2.51341	2.41784	3.20173	1.79571
	ENSMUSG00000001506.11	Col1a1	1.15459	8.37452	49.888	3.18605e-07	5.53402e-06	350.503	365.42	476.497	474.993	462.529	652.799	201.399	171.93	218.357	233.949	215.908
	ENSMUSG00000036040.15	Adamtsl2	1.13906	6.55299	59.6914	7.20676e-08	1.72636e-06	111.014	125.122	157.505	129.519	118.488	170.184	65.3016	48.3234	53.8028	66.5475	73.1487
	ENSMUSG00000074170.6	Plekhf1	1.13004	3.22141	64.6634	3.62708e-08	1.03017e-06	16.7419	13.0363	11.2718	10.9944	13.1494	10.0146	5.14007	5.05675	5.39906	5.3238	7.73739
	ENSMUSG00000025610.8	Map3k7cl	1.12941	0.894349	31.2048	1.06183e-05	9.46202e-05	2.44303	2.5535	3.45669	3.84356	3.59274	1.84983	1.1141	1.43624	1.54929	1.50779	1.08271
	ENSMUSG00000021750.17	Fam107a	1.12338	4.30106	50.9524	2.68541e-07	4.89351e-06	32.9809	31.9188	25.0234	21.8994	29.2449	15.1176	11.7234	11.2505	11.4554	12.3229	12.9661
	ENSMUSG00000096006.2	Gm21596	1.1098	2.52819	40.3248	1.67805e-06	2.1068e-05	6.89797	10.0124	11.1967	9.6536	7.68846	4.78405	4.02596	4.51816	3.56807	3.7974	3.43297
	ENSMUSG00000028931.13	Kcnab2	1.09803	4.34759	139.555	2.61998e-11	4.86267e-09	31.5438	39.0417	28.931	34.6814	31.5442	23.7927	16.1039	13.4348	14.7887	16.0645	13.2301
	ENSMUSG00000005410.7	Mcm5	1.09705	4.11642	101.611	5.86535e-10	4.50598e-08	24.2147	31.7844	25.2489	28.5139	27.0174	19.7741	10.6599	11.9986	13.3803	13.4212	11.3816
	ENSMUSG00000027306.16	Nusap1	1.09674	2.42137	31.8893	9.14598e-06	8.41227e-05	7.61651	12.0955	9.69376	7.68712	8.55071	6.88903	3.06378	3.85989	4.20187	5.1935	4.09316
	ENSMUSG00000020493.9	Prr11	1.09476	1.70826	41.7441	1.29097e-06	1.69782e-05	5.46089	5.84618	5.41047	5.54188	6.10765	4.27375	2.00032	2.30396	3.05164	2.86666	2.4559
	ENSMUSG00000030149.16	Klrk1	1.08151	3.33441	39.7819	1.85805e-06	2.27546e-05	14.1552	18.5465	10.2949	14.5698	17.6044	10.3973	7.62148	6.28354	5.96244	7.78094	5.96809
	ENSMUSG00000081058.6	H3c15	1.0814	1.13575	31.4897	9.97636e-06	9.00688e-05	2.58674	2.88949	3.75727	3.21787	2.73048	3.95481	1.975	1.16694	1.9953	1.17273	1.21474
	ENSMUSG00000026009.15	Icos	1.07878	2.30198	49.2639	3.52609e-07	5.94696e-06	9.77212	9.40764	7.51454	8.40221	10.6345	4.72026	3.64616	4.09926	4.13145	3.4251	4.5949
	ENSMUSG00000004473.11	Clec11a	1.0565	3.2439	42.7815	1.06975e-06	1.4523e-05	12.2152	13.6411	16.006	12.6927	10.6345	16.9674	5.26667	5.77487	7.55868	6.53375	7.79021
	ENSMUSG00000002033.15	Cd3g	1.05455	3.10151	45.3035	6.85824e-07	1.01529e-05	13.3648	18.8153	15.1042	15.8212	12.5027	8.80264	7.92533	7.09142	5.49295	6.83159	6.46983
	ENSMUSG00000035783.10	Acta2	1.05358	7.94335	102.23	5.53528e-10	4.29021e-08	350.503	288.411	322.599	369.697	338.867	304.138	183.878	145	169.084	153.664	140.778
	ENSMUSG00000030336.15	Cd27	1.05052	2.84386	47.6494	4.60337e-07	7.34475e-06	11.1373	14.9178	8.71687	11.7095	13.6524	8.29235	6.93782	5.59534	5.89201	4.72813	4.38364
	ENSMUSG00000029321.2	Slc10a6	1.04898	4.81031	147.824	1.46751e-11	3.6012e-09	38.2981	36.3538	31.9368	38.525	37.58	27.0458	15.9013	16.0679	16.5258	17.0511	18.8021
	ENSMUSG00000017861.12	Mybl2	1.04782	2.14211	61.8896	5.29327e-08	1.3757e-06	6.82612	10.0796	6.16192	5.89942	6.53878	4.78405	2.98782	2.87247	3.47418	3.40649	3.48579
	ENSMUSG00000036768.7	Kif15	1.04469	1.53168	33.9263	5.93165e-06	5.92451e-05	4.02382	5.71178	4.20814	5.54188	4.95798	3.38073	1.74712	2.06459	2.60563	2.6619	2.08619
	ENSMUSG00000001517.15	Foxm1	1.04208	3.14525	32.3259	8.32371e-06	7.77905e-05	10.4188	16.5978	13.977	16.5363	13.5087	9.88703	5.39327	6.49299	6.97183	7.83678	5.88887
	ENSMUSG00000049608.10	Gpr55	1.04089	1.46545	31.0176	1.10646e-05	9.7997e-05	3.66455	4.90541	4.20814	5.18434	3.88016	4.20996	2.48141	1.22679	1.83098	2.97835	1.92775
	ENSMUSG00000057058.17	Skap1	1.04076	2.7131	59.0802	7.86414e-08	1.85328e-06	9.84398	13.8427	9.99434	9.83237	11.353	7.0166	5.24135	4.96699	4.64788	4.52337	5.70402
	ENSMUSG00000029603.16	Dtx1	1.02488	3.39079	45.9027	6.18609e-07	9.34019e-06	16.5982	21.5704	14.1273	19.3072	16.5984	10.5249	9.54584	8.1686	8.21596	8.54414	5.83605
	ENSMUSG00000020395.14	Itk	1.0239	3.55405	54.9134	1.4521e-07	2.9792e-06	16.9575	22.4439	15.5551	16.8044	21.269	13.2678	8.5077	9.12609	9.76525	8.22769	7.94865
	ENSMUSG00000097820.4	E530011L22Rik	1.0231	3.92115	67.7437	2.41722e-08	7.58162e-07	18.8976	20.764	27.6535	20.201	20.263	19.0086	13.4958	9.60483	10.493	9.00951	9.37466
	ENSMUSG00000030087.12	Klf15	1.01381	5.69892	57.2912	1.01925e-07	2.2935e-06	86.4402	65.6519	58.1625	67.8433	80.9084	43.9494	38.2087	31.8964	32.8873	36.9129	26.117
	ENSMUSG00000029436.10	Mmp17	1.00415	2.38142	70.9008	1.61761e-08	5.45637e-07	6.25128	7.12293	8.19085	8.31282	7.25733	7.97341	3.67148	3.17169	2.98122	4.26276	4.5949
	ENSMUSG00000046694.7	Tent5b	0.997988	4.19764	60.5945	6.34233e-08	1.58232e-06	31.1846	24.0567	18.4858	19.3966	23.9995	17.0312	11.9006	10.7718	10.7746	12.1182	10.3781
	ENSMUSG00000023274.15	Cd4	0.997598	3.59785	49.3351	3.48538e-07	5.90486e-06	15.3767	19.6889	17.8095	22.1675	23.7121	12.2472	9.90033	7.77962	9.27229	7.68786	11.5929
	ENSMUSG00000032925.17	Itgbl1	0.98209	2.76612	49.348	3.47807e-07	5.90021e-06	8.98173	7.52611	9.39318	8.49159	10.7064	10.6525	4.50705	4.45832	5.09389	4.13246	5.36072
	ENSMUSG00000032281.12	Acsbg1	0.97873	1.06591	40.5267	1.61599e-06	2.04509e-05	3.37713	2.95669	2.70523	3.57541	3.37717	2.42392	1.62051	1.37639	1.50235	1.80562	1.426
	ENSMUSG00000091269.3	Gm6682	0.972417	2.99749	43.4478	9.49613e-07	1.32165e-05	8.55061	9.67643	14.0522	13.4972	11.353	9.37673	5.51988	5.41581	6.1737	6.27315	4.70053
	ENSMUSG00000034329.17	Brip1	0.963218	1.15374	32.0255	8.88039e-06	8.2113e-05	3.23342	4.50223	3.23125	2.94971	4.02387	2.04119	1.67115	1.85514	1.66667	1.80562	1.53163
	ENSMUSG00000048096.8	Lmod1	0.960279	4.42186	100.996	6.21512e-10	4.71241e-08	31.3283	28.6933	26.0755	30.5697	29.3886	26.7269	16.5343	12.7765	15.8216	15.3943	13.3358
	ENSMUSG00000028862.7	Map3k6	0.959903	5.21504	56.8172	1.09282e-07	2.44017e-06	49.0762	48.9869	42.2317	41.3853	48.502	31.5109	23.5228	21.6932	23.9202	23.7523	19.0926
	ENSMUSG00000032515.9	Csrnp1	0.946455	5.35661	39.0027	2.15414e-06	2.5695e-05	58.3453	52.8844	37.9484	37.4524	43.9751	34.2538	20.6869	18.2522	21.6901	22.6541	31.2929
	ENSMUSG00000070691.11	Runx3	0.940226	3.62693	48.4076	4.05855e-07	6.6395e-06	18.3227	20.9656	15.3297	19.3966	16.5266	12.0558	9.7484	8.04891	8.75586	9.77271	8.08069
	ENSMUSG00000022021.15	Diaph3	0.927546	2.20586	57.5423	9.8247e-08	2.2251e-06	5.96387	6.18217	8.26599	6.79327	6.39507	6.76145	3.62084	3.02208	3.4507	3.96493	3.56501
	ENSMUSG00000054342.9	Kcnn4	0.9254	2.93955	51.6992	2.38545e-07	4.44917e-06	12.287	12.3643	10.8209	14.9273	9.8441	8.22856	7.34295	5.86463	5.77464	6.42207	4.48927
	ENSMUSG00000025498.16	Irf7	0.917895	7.69087	33.7064	6.21062e-06	6.1538e-05	45.2679	77.8147	65.6771	71.24	75.1601	55.2398	35.1955	33.1531	37.0892	32.5199	34.1449
	ENSMUSG00000028351.6	Brinp1	0.906431	1.90724	76.3624	8.33069e-09	3.2943e-07	4.52679	4.30064	5.63591	5.09495	5.17354	5.35813	2.50673	2.2142	3.02817	2.81082	2.77279
	ENSMUSG00000021130.9	Galnt16	0.903333	2.65822	54.362	1.5788e-07	3.189e-06	7.90392	7.9293	9.69376	8.84913	7.32918	10.4611	5.16539	4.06934	4.74178	4.52337	4.72694
	ENSMUSG00000002297.17	Dbf4	0.899279	2.78335	55.9136	1.24958e-07	2.65426e-06	9.98768	10.2812	9.54347	8.67036	10.4189	7.90962	4.38045	4.96699	4.76525	5.99393	5.22868
	ENSMUSG00000031070.16	Mrgprf	0.882605	2.43861	36.6467	3.40896e-06	3.76736e-05	8.55061	6.58535	5.93649	7.15081	7.40104	8.35613	4.73494	3.20161	4.34272	3.83462	3.74986
	ENSMUSG00000025001.12	Hells	0.882465	1.73781	33.002	7.20491e-06	6.93413e-05	3.80825	6.31656	4.73416	4.29049	4.95798	3.76345	2.30417	2.45357	2.46479	2.99696	2.35027
	ENSMUSG00000067818.7	Myl9	0.879552	6.64008	79.6957	5.65679e-09	2.40174e-07	138.893	111.212	120.383	153.027	136.524	116.284	75.6577	74.2056	72.2065	69.2652	60.077
	ENSMUSG00000022346.18	Myc	0.877427	3.63015	43.8221	8.88626e-07	1.25891e-05	15.3049	16.5978	11.873	14.4804	13.5087	10.3335	8.5077	8.10875	6.33802	7.40864	6.86595
	ENSMUSG00000026117.11	Zap70	0.876336	3.15848	84.7972	3.20397e-09	1.54776e-07	13.0774	15.4554	13.6013	15.553	11.9997	10.1422	7.36827	6.61267	7.34741	7.63202	7.15643
	ENSMUSG00000066443.6	Gm10163	0.875165	4.2124	32.4187	8.15955e-06	7.66673e-05	28.3104	27.0134	25.5494	29.1396	20.1193	17.7967	9.69776	11.9686	16.0563	14.8731	14.3393
	ENSMUSG00000062939.12	Stat4	0.866907	2.80874	33.3737	6.66028e-06	6.50692e-05	11.1373	12.3643	9.16774	11.5307	9.41297	6.31494	5.41859	6.76228	4.9061	5.23073	5.04383
	ENSMUSG00000054206.3	Gzmm	0.866748	0.464632	31.5513	9.84308e-06	8.91707e-05	1.72449	2.21752	2.02893	2.05586	2.51492	1.72226	1.03814	1.1071	1.4554	0.986578	1.00348
	ENSMUSG00000060402.9	Chst8	0.866573	2.57169	33.8927	5.97344e-06	5.96284e-05	7.83207	8.60127	8.9423	6.16758	8.33515	8.10098	4.38045	4.96699	4.83568	5.00735	2.74638
	ENSMUSG00000042622.15	Maff	0.855824	4.55573	111.477	2.40476e-10	2.39638e-08	30.3942	29.9701	22.8442	27.62	30.2508	28.0026	16.2558	13.8537	16.4554	15.2827	16.0029
	ENSMUSG00000000028.16	Cdc45	0.855722	1.62017	48.1385	4.24341e-07	6.87441e-06	4.38308	5.77898	3.98271	3.75418	4.67056	3.63588	2.30417	2.30396	2.39436	2.68051	2.37667
	ENSMUSG00000024677.14	Ms4a6b	0.854003	4.98163	34.1092	5.70996e-06	5.75916e-05	37.0047	49.1885	34.2663	37.4524	42.8973	29.087	19.9273	22.8601	24.4366	21.2394	17.5082
	ENSMUSG00000037362.9	Ccn3	0.851547	3.5593	55.2334	1.38367e-07	2.86106e-06	15.8797	15.1194	14.1273	19.3966	14.2272	16.1382	9.59648	10.293	8.89671	8.13462	6.86595
	ENSMUSG00000024590.9	Lmnb1	0.850922	4.54599	91.7412	1.54161e-09	9.23853e-08	30.1068	40.8561	34.1912	34.0558	34.7058	30.1076	18.8132	19.2097	18.8732	20.4575	16.848
	ENSMUSG00000001473.8	Tubb6	0.845518	4.87944	79.962	5.48753e-09	2.35707e-07	31.6875	34.0019	38.6999	36.1116	34.8496	32.5953	18.8638	14.8411	23.0282	20.7554	18.6965
	ENSMUSG00000118157.2	Gm9902	0.842169	0.420366	32.4154	8.16529e-06	7.66798e-05	1.58078	1.74713	1.72834	2.14524	2.58677	1.59468	1.06346	0.867726	1.00939	1.17273	1.13552
	ENSMUSG00000039470.16	Zdhhc2	0.838321	1.80165	38.2554	2.48685e-06	2.88736e-05	5.17348	5.51019	4.20814	4.37987	4.45499	5.67707	2.73462	2.75279	2.79343	3.20173	2.21823
	ENSMUSG00000120992.1	ENSMUSG00000120992.1	0.836253	6.9646	31.1734	1.06918e-05	9.52267e-05	112.308	140.711	111.516	106.994	120.213	76.3534	60.8199	58.3172	61.9718	74.347	56.1423
	ENSMUSG00000025422.11	Agap2	0.833585	3.20276	64.8144	3.55445e-08	1.01556e-06	12.4307	14.1787	12.7747	16.1787	13.0057	9.56809	7.9	6.13393	7.23004	7.9857	7.10361
	ENSMUSG00000045826.10	Ptprcap	0.833087	3.95152	32.4924	8.03164e-06	7.57102e-05	23.4962	26.0054	20.0638	24.4915	21.1971	14.8624	13.7237	12.3277	13.6854	12.6208	8.34476
	ENSMUSG00000044026.4	Slc35g1	0.829503	2.56944	55.7991	1.27114e-07	2.68695e-06	7.97578	9.81083	7.36425	6.88266	7.90402	6.82524	3.8234	4.39848	4.06103	5.04458	4.5949
	ENSMUSG00000001281.11	Itgb7	0.826417	5.5152	45.6472	6.46355e-07	9.66706e-06	62.6566	78.4866	60.8678	77.3182	68.8368	44.2046	38.7911	32.7043	37.4413	40.3566	34.6994
	ENSMUSG00000070000.14	Fcho1	0.825407	3.45829	45.8213	6.27301e-07	9.4306e-06	15.3049	19.2185	14.2025	15.6424	16.0955	10.1422	8.45706	7.18118	8.00469	9.90301	8.92573
	ENSMUSG00000000486.14	Septin1	0.815083	4.5277	40.5749	1.60157e-06	2.02831e-05	32.5498	40.6545	27.8038	35.6647	31.9754	24.5581	20.6869	18.2223	18.1925	17.6467	16.6895
	ENSMUSG00000029661.17	Col1a2	0.813835	8.77777	44.0382	8.55348e-07	1.22266e-05	445.638	469.979	554.423	551.685	568.802	726.92	298.225	280.814	339.695	344.428	309.443
	ENSMUSG00000030862.14	Cpxm2	0.805146	1.81146	31.5455	9.85558e-06	8.92375e-05	5.10162	4.03185	5.33532	4.02233	5.46096	3.5083	2.88654	2.69294	2.39436	2.25238	2.87842
	ENSMUSG00000115018.3	ENSMUSG00000115018.3	0.804669	3.53287	59.975	6.92231e-08	1.67432e-06	14.5145	13.5067	12.8499	19.486	16.4547	17.095	9.95097	8.5875	8.2629	9.66102	8.21273
	ENSMUSG00000060950.13	Trmt61a	0.803385	2.95523	67.248	2.57787e-08	7.91234e-07	7.97578	10.2812	11.4972	10.8156	11.0656	8.67507	6.07693	4.45832	5.6338	5.9567	6.57546
	ENSMUSG00000027408.8	Cpxm1	0.798103	4.75764	41.9861	1.23525e-06	1.63651e-05	27.52	32.7924	37.723	40.849	27.3048	35.2106	13.3186	18.0427	21.5728	20.3458	23.0273
	ENSMUSG00000029657.16	Hsph1	0.797882	5.96773	33.3766	6.65619e-06	6.50658e-05	82.7756	82.9889	83.712	100.022	95.8542	58.174	48.9952	51.4651	56.4788	47.7653	36.2839
	ENSMUSG00000054364.6	Rhob	0.796425	7.87643	67.8231	2.3925e-08	7.53119e-07	293.595	333.434	262.333	272.357	264.282	276.901	163.824	140.003	157.019	171.125	185.09
	ENSMUSG00000083261.5	Gm7816	0.794729	3.67115	36.5378	3.48365e-06	3.83531e-05	16.7419	14.649	17.4337	17.162	17.1733	11.099	9.59648	9.51507	10.5164	7.42726	8.15991
	ENSMUSG00000034906.16	Ncaph	0.79471	3.34053	100.786	6.3397e-10	4.74498e-08	12.3589	14.1115	15.1042	15.1061	13.6524	13.5229	8.02661	8.40797	7.84037	7.59479	8.39758
	ENSMUSG00000015605.7	Srf	0.790359	5.87682	205.286	4.97407e-13	3.34127e-10	73.2909	74.9924	67.1048	78.659	78.7528	67.2956	41.9308	38.6886	40.1878	41.9203	49.2235
	ENSMUSG00000040010.11	Slc7a5	0.789442	3.66877	78.286	6.65246e-09	2.75563e-07	14.8019	17.1354	13.8268	16.0893	14.6584	13.9056	8.40642	7.51032	8.94366	9.27011	9.37466
	ENSMUSG00000028581.18	Laptm5	0.78842	7.95048	114.018	1.93186e-10	2.08065e-08	282.817	367.368	317.339	339.574	316.448	261.081	185.878	157.807	186.314	206.679	172.335
	ENSMUSG00000022102.14	Dok2	0.786875	3.32811	58.7411	8.25668e-08	1.92498e-06	12.2152	14.9178	12.2487	15.1955	15.4488	11.0352	7.7734	6.94181	7.48826	9.84717	6.91876
	ENSMUSG00000020901.14	Pik3r5	0.786245	4.8718	109.688	2.8127e-10	2.69497e-08	35.6395	41.9312	36.4455	41.1172	40.2387	29.9162	23.4215	21.0349	23.2864	21.6116	19.3567
	ENSMUSG00000054717.8	Hmgb2	0.78544	5.54928	67.3136	2.55598e-08	7.86168e-07	64.1655	86.5503	66.5037	76.1562	68.3339	52.9434	40.5128	40.3942	42.23	41.6038	35.5445
	ENSMUSG00000020363.7	Gfpt2	0.783477	4.30905	56.3036	1.17911e-07	2.55118e-06	29.1727	21.772	24.1968	22.8826	23.7121	18.5621	15.6987	10.1733	15.2582	12.9186	13.7319
	ENSMUSG00000038264.9	Sema7a	0.782626	6.68838	90.7731	1.70248e-09	9.68096e-08	129.912	131.237	130.227	118.525	126.895	114.434	70.543	66.2165	69.8826	69.7306	87.5672
	ENSMUSG00000003032.9	Klf4	0.77728	7.20603	72.6299	1.30568e-08	4.64688e-07	168.282	150.724	179.898	171.709	189.768	168.079	92.268	92.4278	106.854	103.2	105.181
	ENSMUSG00000038252.14	Ncapd2	0.776295	4.37923	59.1842	7.74782e-08	1.83579e-06	29.5319	34.0691	26.9021	32.6256	30.179	24.9408	17.5218	15.8584	16.9953	19.3593	16.8216
	ENSMUSG00000033220.8	Rac2	0.774748	6.31286	51.8865	2.31606e-07	4.33367e-06	100.164	132.849	110.313	121.921	112.596	74.7587	66.4917	62.2668	66.4319	65.5423	56.8553
	ENSMUSG00000022014.16	Epsti1	0.77182	4.0572	46.9038	5.21738e-07	8.131e-06	16.6701	22.5783	19.1621	16.1787	17.0296	16.3933	10.3055	9.51507	11.5258	11.2805	10.0613
	ENSMUSG00000038463.9	Olfml2b	0.770552	4.47451	103.435	4.94809e-10	3.94017e-08	30.1786	26.207	26.3009	28.0669	29.173	25.8976	17.4205	14.4821	17.0657	14.8359	17.1649
	ENSMUSG00000020155.3	Kcnmb1	0.766681	2.89294	79.4474	5.81971e-09	2.46335e-07	10.4907	9.47484	7.66483	9.20667	10.3471	9.50431	5.89968	5.29612	6.07981	5.34241	5.14946
	ENSMUSG00000022096.15	Hr	0.75913	4.65473	53.2407	1.87511e-07	3.65773e-06	35.4958	35.0099	39.2259	26.3686	28.9575	38.3999	22.3327	18.2821	22.1831	19.0056	18.5116
	ENSMUSG00000032085.6	Tagln	0.757217	7.45974	144.859	1.80058e-11	3.90887e-09	215.418	206.431	211.835	220.156	219.732	203.418	122.501	126.389	130.211	118.538	131.932
	ENSMUSG00000070576.5	Mn1	0.753631	3.09755	67.1193	2.62148e-08	7.99232e-07	12.0714	11.2892	11.4221	10.6368	11.5686	9.56809	7.26699	6.31346	6.59624	6.087	6.62828
	ENSMUSG00000042510.8	AA986860	0.753475	6.6555	107.057	3.55545e-10	3.11575e-08	132.642	127.205	108.735	104.67	124.021	97.9135	72.4674	71.6024	67.8169	63.5691	68.3162
	ENSMUSG00000031827.14	Cotl1	0.751113	6.60771	83.2654	3.78924e-09	1.76426e-07	108.571	140.308	131.429	141.497	123.59	105.249	75.6831	63.0149	79.014	84.883	68.6595
	ENSMUSG00000018362.15	Kpna2	0.74338	5.30273	91.1554	1.63688e-09	9.49255e-08	48.0702	57.9242	51.3243	54.4356	52.5258	39.9946	29.0426	33.1831	29.3662	29.5229	30.2894
	ENSMUSG00000117438.2	Rpsa-ps7	0.741462	2.71231	51.4672	2.47451e-07	4.57613e-06	8.19134	9.74363	9.61861	9.56421	8.76628	6.44252	4.65898	5.20636	5.70422	5.06319	5.38713
	ENSMUSG00000022382.16	Wnt7b	0.738508	2.59092	43.2323	9.86788e-07	1.36468e-05	7.04168	8.33248	7.89027	9.29606	7.11362	6.12358	4.76026	4.30871	5.28169	4.54198	3.8819
	ENSMUSG00000048163.14	Selplg	0.735732	6.27236	98.7505	7.69811e-10	5.49999e-08	93.4819	121.09	101.221	106.19	95.7824	81.5839	57.0978	57.5093	65.2816	62.3406	57.5155
	ENSMUSG00000022696.18	Sidt1	0.734329	3.3511	42.0372	1.2238e-06	1.6242e-05	13.293	15.4554	12.3238	13.4972	12.7901	10.9714	8.60898	8.85679	7.11267	7.01774	7.68458
	ENSMUSG00000049482.17	Ctu2	0.730739	4.51466	211.041	3.72035e-13	3.34127e-10	27.8074	28.1557	28.0292	28.2457	28.0234	27.301	16.4583	15.6789	16.7136	17.535	17.693
	ENSMUSG00000033585.6	Ndn	0.723069	3.80893	60.0049	6.89302e-08	1.67126e-06	13.9396	16.7322	20.2893	20.5586	16.5266	21.5601	10.2042	11.9686	12.0657	9.95886	11.144
	ENSMUSG00000028464.17	Tpm2	0.723035	5.87938	62.7411	4.70708e-08	1.26287e-06	82.4882	72.1029	66.8794	72.7595	73.5793	64.5527	50.9449	38.4792	45.9859	40.9523	41.8295
	ENSMUSG00000025981.14	Coq10b	0.708597	4.66151	32.9897	7.22374e-06	6.94458e-05	27.7356	30.3061	23.7459	20.2904	28.7419	32.2126	12.3058	14.8411	19.3192	18.9311	17.8515
	ENSMUSG00000053398.12	Phgdh	0.704604	3.66052	36.087	3.81218e-06	4.11823e-05	16.0953	18.9497	14.5031	15.9999	16.7422	12.885	11.6221	8.19852	10.0939	10.5359	8.1071
	ENSMUSG00000051457.8	Spn	0.703711	5.79267	37.4037	2.9356e-06	3.31567e-05	78.1051	91.4557	72.9662	85.9885	79.2558	51.5401	46.7417	48.5328	51.7605	48.7332	38.951
	ENSMUSG00000027510.18	Rbm38	0.701147	4.27027	73.6153	1.15763e-08	4.22342e-07	23.9273	25.1318	21.8673	30.2122	27.0174	21.305	16.9141	13.8537	15.8451	16.4926	13.2566
	ENSMUSG00000006585.4	Cdt1	0.700339	3.04106	41.8383	1.26896e-06	1.67266e-05	9.98768	10.8188	9.69376	12.7821	11.4249	8.41992	6.00097	5.9544	7.20657	7.24111	5.80965
	ENSMUSG00000025507.14	Pidd1	0.698162	2.57606	46.8097	5.30108e-07	8.21738e-06	6.89797	7.52611	8.1157	9.6536	7.04177	8.29235	4.48173	4.51816	4.92957	5.54718	4.83257
	ENSMUSG00000080893.2	Ndufa12-ps	0.697794	2.71587	43.0214	1.02469e-06	1.40577e-05	9.55656	7.52611	7.2891	9.0279	8.47886	7.20796	6.5327	4.81738	4.06103	4.93289	4.83257
	ENSMUSG00000005763.16	Cd247	0.695471	3.91369	43.1978	9.92873e-07	1.37092e-05	20.2628	22.3096	20.4395	23.0614	25.0055	13.9056	13.3692	11.849	12.6291	12.416	13.9167
	ENSMUSG00000068220.7	Lgals1	0.694849	6.6081	62.5074	4.86063e-08	1.29913e-06	141.48	132.177	123.689	141.318	113.387	96.4464	84.5199	75.3426	79.0375	76.0968	70.0855
	ENSMUSG00000034168.8	Irf2bpl	0.693174	6.82802	171.353	3.25233e-12	1.26038e-09	125.601	142.862	144.58	131.754	129.339	143.968	88.2167	77.2276	86.0563	88.8851	81.2294
	ENSMUSG00000055452.7	Gm7353	0.6917	3.48359	86.7231	2.60342e-09	1.31944e-07	12.7181	13.4395	14.3528	13.4972	13.365	14.4797	8.58366	8.49773	9.27229	7.61341	8.29195
	ENSMUSG00000031506.12	Ptpn7	0.690925	3.73402	46.3366	5.74413e-07	8.76703e-06	17.1731	21.436	16.8326	22.972	18.1793	15.6917	11.4955	10.0537	11.9249	12.2857	12.0154
	ENSMUSG00000007659.19	Bcl2l1	0.689537	7.20848	103.651	4.85033e-10	3.88004e-08	194.293	181.635	170.129	157.944	189.768	152.005	108.676	104.426	110	108.505	108.772
	ENSMUSG00000056749.8	Nfil3	0.689234	3.65173	32.1937	8.56384e-06	7.95657e-05	13.0774	15.2538	21.1159	14.9273	13.0057	17.095	9.29263	10.4127	9.34272	9.79132	10.0084
	ENSMUSG00000053175.18	Bcl3	0.68509	4.54003	38.4757	2.3833e-06	2.78755e-05	20.7658	25.2662	25.3991	26.3686	21.0534	26.0252	14.6353	12.6868	16.5962	15.1896	15.8709
	ENSMUSG00000050106.19	Tmc8	0.68494	3.23188	33.975	5.87177e-06	5.88349e-05	10.9218	13.9771	11.0464	12.5139	13.4368	11.9282	8.96347	7.0615	7.60563	8.37661	6.20576
	ENSMUSG00000107023.3	Gm42715	0.684605	5.7015	38.9222	2.18756e-06	2.60047e-05	64.884	61.6201	59.2146	51.3965	61.2921	76.6723	37.3731	46.3486	39.7887	42.8138	28.4145
	ENSMUSG00000032997.17	Chpf	0.683246	5.88436	96.7554	9.34128e-10	6.2856e-08	67.0396	70.6245	83.8623	78.3014	64.9567	72.7813	44.6401	45.8698	47.4882	48.5843	40.2978
	ENSMUSG00000035372.3	1810055G02Rik	0.681595	4.31696	205.614	4.89151e-13	3.34127e-10	23.4244	23.0487	24.272	22.8826	23.3528	23.2824	13.5718	14.9907	14.5775	14.687	15.0523
	ENSMUSG00000056394.21	Lig1	0.680557	3.92878	63.5544	4.21262e-08	1.14312e-06	20.7658	21.772	19.6129	21.0949	19.8319	15.2452	12.7109	12.208	12.676	12.1368	11.6985
	ENSMUSG00000028893.9	Sesn2	0.676163	4.56285	142.39	2.14073e-11	4.1703e-09	30.0349	31.986	26.7518	28.9608	28.2389	27.7475	17.2433	18.4317	17.3005	18.4658	19.1718
	ENSMUSG00000066878.6	Gm10184	0.674461	3.84187	74.0222	1.10192e-08	4.06266e-07	18.5383	20.5624	16.6823	19.039	15.9518	15.4365	9.97629	11.849	11.6667	10.7965	11.144
	ENSMUSG00000090077.10	Lime1	0.67071	4.32756	60.0603	6.83907e-08	1.66202e-06	24.071	28.2901	24.5725	27.7988	28.1671	20.6033	18.9398	16.2773	16.2676	14.9662	13.8375
	ENSMUSG00000054046.8	Klk13	0.6686	2.49501	32.9689	7.25564e-06	6.96758e-05	5.17348	7.45892	8.86716	5.72065	7.76031	7.39932	4.63366	4.21895	4.03756	5.02596	4.30442
	ENSMUSG00000049907.9	Rasl11b	0.665736	4.87781	81.9747	4.37302e-09	1.96549e-07	36.2143	38.9745	31.1853	34.3239	35.7118	35.0192	22.4846	19.479	22.6291	23.7151	22.7104
	ENSMUSG00000024660.10	Incenp	0.6652	3.94052	46.2209	5.85851e-07	8.91506e-06	17.7479	27.2822	20.8153	21.8994	22.1313	17.2864	13.192	12.7167	12.5352	13.8866	14.4449
	ENSMUSG00000105987.6	AI506816	0.663293	5.36615	91.9097	1.51534e-09	9.14393e-08	53.1718	57.1178	54.3301	48.5361	54.3222	47.9042	34.7651	33.2429	36.3615	31.887	29.7348
	ENSMUSG00000032724.6	Abtb2	0.663097	3.6649	75.6699	9.04318e-09	3.47366e-07	14.1552	15.7914	16.3817	14.9273	15.3769	18.2432	11.0904	8.5875	10.0939	11.113	9.00495
	ENSMUSG00000027863.9	Cd2	0.658468	4.45316	43.5313	9.35627e-07	1.3074e-05	28.1667	34.5395	28.2547	30.9273	27.7359	21.8153	19.6234	18.1923	18.615	18.7636	15.1843
	ENSMUSG00000000359.4	Rem1	0.657323	3.45938	32.6413	7.77998e-06	7.35078e-05	14.1552	12.2299	14.5031	13.7653	11.0656	16.0744	9.46988	6.97173	9.1784	8.65583	8.89932
	ENSMUSG00000035397.9	Klf16	0.657112	4.49983	62.3885	4.9408e-08	1.30747e-06	25.7237	24.5943	25.0234	27.7094	30.2508	28.5129	17.4205	16.9057	17.6056	17.3303	16.2142
	ENSMUSG00000026208.10	Des	0.656568	7.35965	60.2779	6.63185e-08	1.63583e-06	198.82	179.552	185.985	221.05	210.75	189.129	151.214	109.244	121.197	124.29	120.445
	ENSMUSG00000074406.6	Zfp628	0.650922	4.47954	87.5084	2.39466e-09	1.23682e-07	25.5081	26.9462	25.6997	23.8658	29.2449	27.6199	15.9773	15.5892	16.8075	17.8329	18.1419
	ENSMUSG00000003585.14	Sec14l2	0.649096	4.30877	74.68	1.01791e-08	3.8423e-07	26.6578	25.1318	27.2026	23.5083	29.173	23.9202	15.3949	15.1104	18.662	17.2186	16.2406
	ENSMUSG00000042745.10	Id1	0.647535	6.12938	48.6572	3.89487e-07	6.42598e-06	69.6264	69.5494	89.7988	84.0221	74.1541	78.7135	53.9074	47.3659	46.8075	50.7622	48.801
	ENSMUSG00000037887.12	Dusp8	0.647151	5.40276	37.9356	2.64596e-06	3.03372e-05	51.6629	47.9118	52.9024	49.7875	52.6695	49.18	33.9042	31.9263	38.4742	29.2995	28.2032
	ENSMUSG00000015053.15	Gata2	0.64606	7.57695	157.232	7.84647e-12	2.35922e-09	232.735	233.914	241.893	228.379	235.54	224.595	163.165	144.731	150.587	150.723	134.705
	ENSMUSG00000028410.14	Dnaja1	0.645974	7.05026	65.1104	3.41661e-08	9.86462e-07	156.282	150.052	153.221	166.614	170.439	128.85	91.1033	100.985	96.2206	100.65	103.729
	ENSMUSG00000023988.9	Bysl	0.645963	4.49099	109.53	2.8522e-10	2.69497e-08	25.4363	25.4678	29.6073	31.106	26.227	27.6837	17.9016	16.6963	19.108	17.6839	16.6103
	ENSMUSG00000098112.9	Bin2	0.64485	5.18763	59.7804	7.11612e-08	1.70699e-06	43.3279	57.7226	47.1913	47.9998	48.2145	37.3793	30.5366	28.5153	33.6854	31.4588	25.8529
	ENSMUSG00000002257.9	Def6	0.644697	3.98057	60.213	6.69289e-08	1.64855e-06	21.4843	24.0567	18.0349	22.4357	18.8259	16.0106	12.5843	12.6868	13.3803	13.142	12.5171
	ENSMUSG00000050592.9	Fam78a	0.643552	4.09501	43.5329	9.35361e-07	1.3074e-05	24.1429	26.7446	17.8846	24.4915	23.7839	20.5395	15.3442	14.4521	15.6103	15.2454	12.6756
	ENSMUSG00000040488.19	Ltbp4	0.643371	9.85029	164.969	4.80309e-12	1.67522e-09	1099.94	1077.44	1215.18	1234.23	1124.53	1123.55	747.234	699.417	738.896	784.776	697.316
	ENSMUSG00000037907.17	Ankrd13b	0.642712	3.80491	51.8032	2.34665e-07	4.38149e-06	16.5982	14.4475	19.6881	17.6983	19.4008	20.6033	12.0526	10.7419	11.1972	11.7459	12.121
	ENSMUSG00000028108.17	Ecm1	0.637562	7.17458	153.836	9.79803e-12	2.75593e-09	179.275	180.963	194.927	168.402	164.547	163.423	122.577	103.08	113.216	108.654	115.718
	ENSMUSG00000021493.16	Pdlim7	0.636461	5.46474	76.1177	8.57515e-09	3.35666e-07	44.8368	47.307	61.995	52.3797	54.897	60.1514	35.6513	31.9563	36.9483	36.0753	31.6626
	ENSMUSG00000032300.8	1700017B05Rik	0.629886	5.03889	212.098	3.52989e-13	3.34127e-10	39.1603	40.3857	41.6306	39.3295	39.4483	38.081	26.5866	24.8349	26.9249	25.3718	24.4269
	ENSMUSG00000033450.9	Tagap	0.628714	3.72433	36.8855	3.25127e-06	3.62525e-05	16.1671	20.6296	12.8499	19.1284	15.808	12.8212	10.9891	10.2033	11.2206	9.58656	10.431
	ENSMUSG00000021922.18	Itih4	0.626163	6.61314	34.8754	4.87447e-06	5.06452e-05	99.0146	112.085	109.487	98.1449	128.692	118.006	59.5032	72.9489	63.8028	79.9501	83.1836
	ENSMUSG00000017929.14	B4galt5	0.622562	5.76474	50.4996	2.88704e-07	5.10482e-06	54.2497	61.1497	56.1336	72.0445	59.1365	54.1554	41.1459	37.1028	40.4225	38.1043	36.099
	ENSMUSG00000033287.18	Kctd17	0.621611	4.995	139.549	2.62109e-11	4.86267e-09	35.9269	38.8401	38.8502	44.0669	39.0171	38.3362	26.4346	22.7105	24.953	26.2467	26.7772
	ENSMUSG00000039942.16	Ptger4	0.620311	3.34167	51.2203	2.57334e-07	4.71886e-06	9.84398	12.5659	10.5955	12.7821	12.7901	10.7801	7.95065	7.4804	8.05164	7.4831	6.57546
	ENSMUSG00000028840.11	Zfp593	0.618896	3.04557	52.4741	2.11224e-07	4.02132e-06	10.9936	9.94522	10.8209	8.84913	8.76628	9.95082	6.86186	6.34338	6.33802	6.31038	6.3642
	ENSMUSG00000006369.15	Fbln1	0.61853	6.76464	124.135	8.39784e-11	1.1623e-08	124.954	124.517	122.863	139.798	134.009	125.597	90.0145	78.6639	88.5445	78.9449	82.6026
	ENSMUSG00000045092.9	S1pr1	0.618443	8.6152	141.746	2.24069e-11	4.294e-09	477.756	491.549	442.08	430.747	470.649	467.944	290.654	277.523	317.371	341.244	282.56
	ENSMUSG00000032400.19	Zwilch	0.617985	1.46743	31.3286	1.0334e-05	9.2703e-05	3.16157	3.83025	3.3064	3.66479	4.16758	3.06179	2.17757	2.30396	2.25352	2.62467	2.1126
	ENSMUSG00000028600.16	Podn	0.617703	5.82571	35.8349	4.01046e-06	4.2907e-05	64.4529	59.8729	67.4054	72.8489	65.3878	70.166	45.8808	40.8131	42.23	38.4766	49.8837
	ENSMUSG00000039911.14	Spsb1	0.614812	5.06252	55.8782	1.25621e-07	2.66509e-06	42.8967	39.2433	35.7692	39.1507	38.7297	29.4697	26.5612	22.531	23.6854	24.2922	25.3776
	ENSMUSG00000046711.17	Hmga1	0.61356	5.56147	68.2291	2.27037e-08	7.2339e-07	54.6089	55.9755	56.8851	60.335	58.3461	42.9926	36.5122	31.5972	35.2112	36.0939	39.5848
	ENSMUSG00000056413.17	Adap1	0.612388	3.52246	44.8207	7.45761e-07	1.09105e-05	12.7181	15.4554	15.2545	15.2849	12.4309	13.4591	9.03943	8.22844	10.1174	8.84197	9.82358
	ENSMUSG00000028896.14	Rcc1	0.609785	3.3774	55.5125	1.32686e-07	2.76804e-06	11.6403	14.2459	13.5262	14.7486	13.7243	13.1402	8.6343	9.0064	8.73239	9.15842	8.66165
	ENSMUSG00000015355.14	Cd48	0.607185	4.36694	36.5557	3.47124e-06	3.82407e-05	31.975	32.0532	23.6708	28.2457	25.7959	18.4983	17.8763	19.3892	16.4789	17.2372	16.6367
	ENSMUSG00000063889.17	Crem	0.607078	3.78406	59.0082	7.94574e-08	1.86998e-06	16.6701	16.3962	17.9598	14.5698	14.9458	16.5209	11.2423	10.6222	10.3052	10.3684	10.6158
	ENSMUSG00000034675.18	Dbn1	0.606492	3.94589	41.3311	1.39247e-06	1.79876e-05	17.3168	14.1115	19.6129	18.6815	18.323	24.1754	12.0779	11.6694	13.5446	12.0437	12.0946
	ENSMUSG00000024247.15	Pkdcc	0.605974	3.3553	32.7448	7.60994e-06	7.22033e-05	13.2211	9.60924	12.3238	14.3016	11.4249	13.7781	9.14071	6.58275	8.16901	7.63202	9.26903
	ENSMUSG00000028480.15	Glipr2	0.605529	5.20914	36.4892	3.51749e-06	3.86282e-05	39.6633	43.8799	58.6134	47.106	43.1847	49.5627	28.6628	27.8869	34.0141	33.1155	30.6063
	ENSMUSG00000022439.10	Parvg	0.602827	4.31309	60.7688	6.18884e-08	1.55291e-06	25.077	28.2229	22.243	27.2625	24.6462	20.6671	16.2305	14.6915	16.2206	18.0562	15.8973
	ENSMUSG00000039244.11	Ints15	0.601567	4.64147	121.075	1.07368e-10	1.37179e-08	30.466	30.5076	31.7865	31.8211	29.0293	28.8319	20.0285	18.7908	20.939	20.4203	19.9112
	ENSMUSG00000055491.15	Pprc1	0.599387	5.46125	91.1461	1.63843e-09	9.49255e-08	55.9023	47.9118	51.5497	50.8602	52.7414	48.5421	33.8789	32.5547	33.8732	32.6502	36.1518
	ENSMUSG00000002083.14	Bbc3	0.598309	4.02585	32.8585	7.42788e-06	7.08615e-05	16.239	17.5385	18.2603	20.648	21.9876	22.6445	13.901	11.2206	13.9202	14.2775	11.144
	ENSMUSG00000030220.14	Arhgdib	0.5982	6.58999	45.0333	7.18696e-07	1.05499e-05	111.373	149.111	117.603	135.687	125.243	95.1068	86.5202	79.9206	81.4788	83.5241	72.4621
	ENSMUSG00000030707.16	Coro1a	0.596481	7.20104	42.4142	1.14297e-06	1.53208e-05	182.15	212.747	176.291	214.793	181.936	141.353	127.109	114.45	129.929	132.425	107.082
	ENSMUSG00000041801.6	Phlda3	0.596018	5.66077	51.9934	2.27744e-07	4.27228e-06	54.6808	54.6315	66.7291	63.9104	53.2444	70.3574	44.1337	35.6366	40.0469	42.6462	37.8155
	ENSMUSG00000070473.5	Cldn3	0.595611	6.74796	96.2349	9.83012e-10	6.54303e-08	133.864	126.802	126.47	136.938	124.955	113.541	89.4574	82.8828	85.1173	86.3349	76.5553
	ENSMUSG00000051735.8	Rinl	0.59497	4.66288	83.6612	3.62764e-09	1.7085e-07	29.8193	36.0178	32.538	38.9719	31.9035	30.6817	22.358	22.0223	22.5117	23.0077	20.2281
	ENSMUSG00000039646.6	Vasn	0.594723	6.06326	82.3372	4.19976e-09	1.8974e-07	72.0694	74.7236	71.2378	77.3182	84.6449	72.9089	48.9952	48.4431	52.7464	51.3579	48.2729
	ENSMUSG00000031165.7	Was	0.583982	3.94663	47.6117	4.63243e-07	7.37761e-06	17.3168	22.3768	20.2893	19.039	19.2571	15.3089	12.3311	11.4001	12.8404	14.1658	12.2795
	ENSMUSG00000034266.7	Batf	0.58381	2.57344	31.5188	9.91314e-06	8.95727e-05	6.10758	7.19013	7.73998	9.20667	7.97588	6.63388	4.6843	5.11659	5.11737	5.3238	4.5949
	ENSMUSG00000028063.16	Lmna	0.583686	7.2661	72.381	1.34624e-08	4.76145e-07	174.102	179.955	190.118	190.48	169.936	180.454	120.045	116.904	134.836	121.014	110.41
	ENSMUSG00000041598.8	Cdc42ep4	0.583162	7.4989	77.1283	7.61291e-09	3.07319e-07	195.371	204.751	224.534	191.195	210.75	196.337	136.098	122.649	133.756	140.206	147.512
	ENSMUSG00000023908.9	Pkmyt1	0.580464	3.70195	32.9075	7.35091e-06	7.02769e-05	15.5923	16.5306	15.1042	15.9106	16.4547	14.2246	11.6221	8.67726	11.4554	11.8762	8.50321
	ENSMUSG00000043091.10	Tuba1c	0.579477	5.98916	52.9874	1.95008e-07	3.76606e-06	67.9737	73.9844	78.1512	86.0779	79.2558	63.277	49.4763	45.4509	49.6244	53.0891	52.234
	ENSMUSG00000028458.13	Tesk1	0.579267	5.79202	202.087	5.8643e-13	3.65241e-10	62.5128	63.9048	71.2378	66.5026	64.7411	63.3408	44.5895	43.3265	42.7464	43.577	44.4702
	ENSMUSG00000055805.16	Fmnl1	0.578395	6.30749	89.7665	1.88931e-09	1.03936e-07	90.1047	110.338	96.4867	103.597	94.9201	85.7301	67.7071	59.7534	65.7981	72.2622	58.5718
	ENSMUSG00000007207.11	Stx1a	0.57813	2.88258	34.8256	4.92452e-06	5.10878e-05	8.47875	8.73567	8.9423	10.5475	9.70039	8.80264	6.38077	5.62526	6.9953	5.39826	6.3642
	ENSMUSG00000019139.11	Isyna1	0.577821	5.54638	68.2196	2.27317e-08	7.2339e-07	49.2917	52.6828	63.3476	58.5473	59.7831	54.0278	40.4875	34.4398	40.2817	39.8913	33.1942
	ENSMUSG00000003873.12	Bax	0.575781	5.2937	132.928	4.2612e-11	7.13682e-09	41.6034	42.1328	49.4457	48.4468	44.2625	52.178	29.8782	30.4602	31.5023	31.9056	31.6626
	ENSMUSG00000001053.16	N4bp3	0.571974	5.41322	33.3039	6.75909e-06	6.57767e-05	43.9027	46.0975	60.3418	54.3462	50.1546	54.5381	35.0943	37.8508	36.6197	35.7402	28.0183
	ENSMUSG00000006442.11	Srm	0.571651	3.81048	37.5295	2.86409e-06	3.23961e-05	15.5204	14.3803	19.0118	18.8603	18.323	14.7349	11.8753	11.3702	11.8779	11.4853	9.77077
	ENSMUSG00000040857.16	Erf	0.571103	5.61821	74.3738	1.05612e-08	3.92701e-07	57.9861	51.8764	54.4053	56.3127	61.7232	56.1328	40.5635	35.128	37.8873	40.8406	35.2804
	ENSMUSG00000039903.19	Eva1c	0.570608	3.68141	48.6434	3.90367e-07	6.43442e-06	17.1731	17.1354	16.006	13.3184	15.3769	11.5455	10.3055	10.7419	10.3286	10.4056	9.03136
	ENSMUSG00000037692.15	Ahdc1	0.570256	5.60995	50.5624	2.85813e-07	5.07751e-06	53.6748	57.5882	64.7002	64.2679	59.4239	66.8491	42.26	35.7862	42.7464	42.0692	42.7009
	ENSMUSG00000067121.3	Gm7027	0.568404	2.88819	38.2157	2.506e-06	2.90762e-05	9.62842	9.54204	8.41628	8.93852	9.26926	7.78205	5.74776	6.01424	6.3615	6.92466	4.99101
	ENSMUSG00000049130.7	C5ar1	0.567133	4.02132	50.0895	3.08399e-07	5.38894e-06	15.8797	20.764	22.0927	19.9329	18.1793	17.5415	14.0529	12.4474	13.4272	11.932	12.4379
	ENSMUSG00000034227.8	Foxj1	0.566921	6.92266	44.0725	8.50203e-07	1.2163e-05	156.929	166.65	143.603	153.027	153.266	98.7427	106.523	94.9712	94.507	95.3072	99.1865
	ENSMUSG00000038400.16	Pmepa1	0.566601	6.13901	43.6306	9.19276e-07	1.29284e-05	73.6502	74.3204	85.3652	86.1673	78.3935	104.994	58.693	49.2809	58.8967	58.9155	57.1194
	ENSMUSG00000022557.12	Bop1	0.565377	5.10686	85.0282	3.12455e-09	1.5263e-07	36.7173	37.4962	45.7635	44.0669	42.6817	36.6777	26.4853	24.9845	29.0375	28.3315	27.9919
	ENSMUSG00000001435.16	Col18a1	0.564787	6.34854	112.227	2.25333e-10	2.2946e-08	86.0809	98.9147	104.152	92.0667	94.489	103.591	64.8459	59.5739	68.3333	69.9726	63.5892
	ENSMUSG00000020241.14	Col6a2	0.564604	8.14592	39.6722	1.89694e-06	2.31096e-05	293.667	297.819	340.108	348.692	342.963	402.37	225.125	203.108	233.263	237.989	241.787
	ENSMUSG00000029674.14	Limk1	0.56393	4.90422	87.9655	2.28158e-09	1.19127e-07	31.6157	37.0258	36.8212	40.4915	35.2088	36.1674	25.6497	22.89	24.4836	26.0233	23.2914
	ENSMUSG00000042804.14	Gpr153	0.562879	5.14532	67.0525	2.64442e-08	8.04817e-07	41.8189	39.7809	49.8214	41.3853	42.4662	46.6923	29.4984	25.4633	31.4084	31.2913	30.0253
	ENSMUSG00000072941.6	Sod3	0.561512	9.00252	65.6183	3.19342e-08	9.34312e-07	518.21	541.141	683.898	584.49	566.503	706.636	418.169	376.533	426.807	416.057	395.69
	ENSMUSG00000059013.13	Sh2d3c	0.560636	6.99553	102.844	5.22717e-10	4.12473e-08	148.234	149.447	145.557	137.653	150.679	138.355	95.2811	91.6499	101.737	105.489	97.2852
	ENSMUSG00000046223.11	Plaur	0.5602	5.37036	46.8254	5.28696e-07	8.21738e-06	42.5375	47.9118	45.3878	42.7261	43.3284	42.6737	25.4725	27.109	32.3709	29.9324	34.6202
	ENSMUSG00000007029.17	Vars	0.558511	6.4718	76.7835	7.92739e-09	3.17077e-07	97.0027	107.382	105.654	99.3963	101.243	84.3906	71.3533	63.4936	67.2535	73.9375	60.4731
	ENSMUSG00000070661.8	Rnf186	0.555258	4.21236	34.5706	5.18971e-06	5.35206e-05	24.6459	23.3847	19.9135	26.2792	22.4187	19.5827	16.3824	15.8285	16.0798	15.6177	13.2037
	ENSMUSG00000029860.17	Zyx	0.554093	8.38567	97.5233	8.66767e-10	5.99824e-08	394.765	385.041	385.646	401.071	370.411	324.805	263.182	227.374	265.281	277.47	250.132
	ENSMUSG00000040289.9	Hey1	0.553856	6.36535	44.7085	7.60495e-07	1.11074e-05	90.0329	83.9296	81.7582	107.173	94.2734	98.5514	64.5167	55.5046	56.7605	69.228	69.1876
	ENSMUSG00000025171.3	Ubtd1	0.553407	4.02677	120.414	1.13303e-10	1.39147e-08	19.6161	17.3369	19.0869	19.5754	19.0415	17.4139	13.6478	12.0883	12.5117	13.0675	12.2267
	ENSMUSG00000034271.17	Jdp2	0.553233	5.08417	77.1707	7.57522e-09	3.06506e-07	41.3878	43.8127	39.8271	36.9161	40.2387	36.869	28.8907	27.109	27.9577	25.6324	26.249
	ENSMUSG00000042784.10	Muc1	0.553197	8.4207	72.7118	1.29261e-08	4.61924e-07	342.743	393.508	396.242	379.619	376.878	385.211	248.698	242.365	269.601	283.781	247.016
	ENSMUSG00000031217.9	Efnb1	0.552459	7.36118	70.3962	1.72326e-08	5.73509e-07	186.676	188.22	207.101	180.022	204.211	207.181	144.048	113.732	132.16	138.028	138.771
	ENSMUSG00000049577.16	Zfpm1	0.548313	4.50868	32.3797	8.22825e-06	7.70636e-05	25.3644	23.3175	31.0351	31.3742	26.1551	26.089	18.8385	19.5089	19.0141	18.0562	17.5082
	ENSMUSG00000041351.17	Rap1gap	0.548017	5.60806	61.7605	5.38887e-08	1.39056e-06	57.9861	56.9162	52.5266	59.7093	62.5855	47.5853	40.0064	32.7642	38.2629	40.822	40.1394
	ENSMUSG00000030411.17	Nova2	0.546759	5.35165	34.2526	5.54245e-06	5.63585e-05	44.3338	40.7217	52.8272	55.1507	48.4301	51.6677	36.8667	37.2225	32.1831	31.738	29.1275
	ENSMUSG00000062825.16	Actg1	0.546712	10.7075	118.401	1.3367e-10	1.55405e-08	1877.33	1884.49	2018.1	1947.88	1844.51	1799.31	1211.44	1217.84	1412.91	1335.42	1309.57
	ENSMUSG00000071076.9	Jund	0.544939	7.81299	48.1243	4.2534e-07	6.88081e-06	232.591	248.832	259.853	258.949	258.821	234.418	170.205	146.077	186.127	170.157	180.31
	ENSMUSG00000041859.11	Mcm3	0.544828	4.78098	94.9845	1.11219e-09	7.21022e-08	32.9809	34.8755	35.6189	34.4133	35.4962	28.3853	22.9657	22.9499	23.4976	22.5796	23.1858
	ENSMUSG00000029570.6	Lfng	0.544259	5.96309	64.9513	3.48993e-08	9.99364e-07	70.5605	71.5653	70.1858	87.5975	70.9206	69.8471	55.452	46.8273	53.0281	51.7861	44.391
	ENSMUSG00000118653.2	Gm2296	0.543528	4.00785	43.1389	1.00337e-06	1.38214e-05	17.8916	18.6137	22.1679	19.5754	17.1014	21.4325	12.9894	13.1655	14.3897	14.3333	11.8306
	ENSMUSG00000036052.15	Dnajb5	0.542454	5.31704	58.3781	8.7006e-08	2.00953e-06	43.5434	44.7535	52.3012	48.8043	47.2086	51.4125	34.7904	32.5547	34.6713	34.251	28.4409
	ENSMUSG00000034471.13	Caskin2	0.54137	7.84603	50.8559	2.72708e-07	4.94066e-06	255.584	245.472	300.657	279.15	265.647	287.489	201.931	179.41	186.314	197.465	170.381
	ENSMUSG00000000782.17	Tcf7	0.541107	5.47525	48.0244	4.32457e-07	6.96364e-06	50.7288	62.5608	52.9024	60.8713	57.9149	50.7747	40.8673	39.5863	38.9906	38.1787	34.5674
	ENSMUSG00000003346.15	Abhd17a	0.540245	5.68556	92.8221	1.38125e-09	8.59937e-08	59.0639	57.2522	60.0412	65.6087	59.9269	59.1946	42.7411	38.6587	40.5868	45.364	39.3207
	ENSMUSG00000032657.16	Entrep3	0.539546	4.19128	83.1007	3.85881e-09	1.77886e-07	21.3406	24.7287	23.9714	23.5977	20.8379	20.4757	16.8635	14.9309	15.5868	14.6311	15.3163
	ENSMUSG00000091957.5	Rps2-ps10	0.538293	5.78869	123.8	8.62484e-11	1.17417e-08	67.1115	64.8455	67.8563	70.3461	63.9507	55.7501	43.2728	40.3044	47.1361	46.4995	46.2131
	ENSMUSG00000048988.9	Elfn1	0.538213	4.55647	39.3724	2.00773e-06	2.42303e-05	24.7177	30.1045	30.2836	32.1787	26.3707	31.2558	21.1933	19.2695	19.8826	21.5558	18.3532
	ENSMUSG00000075600.4	Zc3h3	0.537048	4.66322	56.6548	1.11934e-07	2.46157e-06	27.0889	30.5076	32.3125	31.3742	30.4664	25.6425	22.7885	19.3892	17.8169	21.3883	20.3602
	ENSMUSG00000023991.17	Foxp4	0.536149	6.49182	113.222	2.06799e-10	2.15906e-08	100.308	104.223	117.678	106.19	106.848	103.909	76.7212	72.0213	75.5399	73.2674	69.6893
	ENSMUSG00000030782.18	Tgfb1i1	0.535595	6.90805	54.0829	1.64747e-07	3.28392e-06	141.337	131.64	144.354	140.245	138.464	129.807	98.5475	100.836	101.972	94.0414	79.3017
	ENSMUSG00000044456.17	Rin3	0.535368	6.86541	80.155	5.36835e-09	2.31729e-07	122.511	134.261	152.996	147.932	140.476	132.359	96.1674	95.779	92.1596	102.381	90.8682
	ENSMUSG00000044199.7	S1pr4	0.534738	5.01087	48.1569	4.2305e-07	6.86826e-06	36.6455	43.4768	40.5034	46.7484	43.041	38.1448	33.6257	27.109	27.3709	29.8021	24.8758
	ENSMUSG00000049866.13	Arl4c	0.534269	6.2219	56.7913	1.097e-07	2.44398e-06	89.7455	90.515	78.0761	92.5137	92.8363	79.2238	61.7061	62.3267	62.7699	61.3726	52.6037
	ENSMUSG00000029673.20	Auts2	0.533745	3.61952	35.8044	4.03527e-06	4.31459e-05	13.5804	12.1627	13.9019	15.9999	16.0236	17.988	11.3436	10.0237	11.338	9.82855	9.05777
	ENSMUSG00000032012.10	Nectin1	0.533672	5.61567	87.4333	2.4138e-09	1.23807e-07	50.2258	56.2443	65.2262	54.8825	57.6994	67.9972	40.8927	39.9154	41.2441	42.8882	37.8947
	ENSMUSG00000032786.17	Alas1	0.533443	8.04703	58.9598	8.00116e-08	1.88049e-06	351.725	309.847	306.819	324.826	302.221	247.048	230.619	214.448	210.305	199.326	206.005
	ENSMUSG00000048387.9	Osr1	0.530849	3.82679	35.672	4.14461e-06	4.41796e-05	17.8916	17.2025	19.2372	15.9106	17.9637	15.4365	13.901	10.293	13.8263	10.6476	11.0911
	ENSMUSG00000037221.14	Mospd3	0.530621	4.72565	35.18	4.58009e-06	4.81447e-05	26.9452	30.2389	33.8154	39.0613	35.9274	30.6817	26.2321	19.9577	20.7512	23.2125	23.0537
	ENSMUSG00000004263.16	Atn1	0.528767	7.13426	102.596	5.34925e-10	4.18321e-08	162.677	149.582	176.667	172.871	180.14	172.608	121.665	112.026	116.15	119.413	116.668
	ENSMUSG00000006219.13	Fblim1	0.52839	6.45271	58.8233	8.15962e-08	1.91105e-06	97.5057	106.038	103.175	82.6813	105.626	92.1088	69.9353	60.0526	68.8028	67.3665	73.1751
	ENSMUSG00000035478.15	Mbd3	0.527503	6.16578	109.961	2.74576e-10	2.64548e-08	79.6141	76.6051	86.7178	92.5137	85.5071	82.4132	60.4907	57.5392	61.5493	58.6735	52.5509
	ENSMUSG00000059734.8	Ndufs8	0.526888	4.95248	46.3765	5.7053e-07	8.72761e-06	41.6034	32.7252	41.0294	41.8323	34.7777	31.2558	28.4856	26.3011	24.7887	26.1164	23.1858
	ENSMUSG00000031770.17	Herpud1	0.525556	7.42611	44.6398	7.69673e-07	1.12133e-05	217.861	200.853	188.314	178.055	206.798	155.258	140.58	127.257	128.216	132.574	135.444
	ENSMUSG00000012017.5	Scarf2	0.52439	7.29538	41.2983	1.4009e-06	1.80697e-05	159.084	170.48	208.528	194.681	171.23	194.743	113.892	127.586	133.967	138.363	122.61
	ENSMUSG00000017721.16	Pigt	0.524253	6.35689	102.085	5.6106e-10	4.32934e-08	83.4223	89.3054	100.019	100.737	96.7165	102.251	66.4411	63.4637	65.4694	68.2973	67.92
	ENSMUSG00000030530.16	Furin	0.522044	7.42655	162.69	5.53837e-12	1.85738e-09	186.964	194.738	217.546	207.91	199.325	211.774	145.39	136.293	138.404	149.476	137.319
	ENSMUSG00000047040.10	Prr15l	0.521966	6.18479	48.3854	4.07345e-07	6.65764e-06	94.2004	89.1038	87.5444	70.078	80.9803	68.1248	55.3254	58.6164	59.1314	55.6207	55.799
	ENSMUSG00000028820.15	Sfpq	0.521951	7.14721	73.7578	1.13779e-08	4.16846e-07	150.318	164.567	180.199	172.782	180.355	157.363	106.979	115.228	115.188	126.394	119.652
	ENSMUSG00000034595.18	Ppp1r18	0.520715	6.57002	102.717	5.28908e-10	4.15478e-08	109.362	118.939	115.874	103.24	113.315	98.4876	77.8859	73.3378	78.568	80.1548	72.9111
	ENSMUSG00000026576.13	Atp1b1	0.520625	8.24194	98.7117	7.72691e-10	5.49999e-08	366.023	373.013	322.299	315.708	354.1	364.417	250.319	235.244	238.169	262.02	231.62
	ENSMUSG00000004947.16	Dtx2	0.519253	4.47489	60.4226	6.49775e-08	1.61416e-06	27.5919	23.4519	24.4974	29.0502	28.4545	23.8564	19.3449	15.7687	17.23	18.6705	20.0433
	ENSMUSG00000017817.12	Jph2	0.519161	5.43083	58.1609	8.97865e-08	2.06296e-06	49.7947	50.3981	47.6422	50.3239	52.5258	55.3674	39.8545	30.1909	33.5211	36.1497	38.238
	ENSMUSG00000004864.14	Mapk13	0.518587	3.52019	37.7399	2.74872e-06	3.13505e-05	12.3589	12.9691	14.0522	11.4413	13.5087	12.3747	8.43174	7.80954	9.15492	9.45626	9.74436
	ENSMUSG00000045555.4	Mettl24	0.51843	3.42077	36.9478	3.21141e-06	3.58768e-05	12.7181	12.6331	13.0002	12.6927	10.5626	12.9488	8.35577	8.46781	8.9906	8.89782	8.63525
	ENSMUSG00000051495.9	Irf2bp2	0.515362	6.88511	49.6827	3.2938e-07	5.69242e-06	139.684	152.135	131.655	134.972	134.153	132.805	93.0276	82.7631	95.0938	105.508	104.732
	ENSMUSG00000028776.15	Tinagl1	0.514871	7.00854	31.7863	9.35263e-06	8.57065e-05	149.097	154.017	154.499	139.977	158.152	128.212	104.498	87.9994	110.469	107.984	104.442
	ENSMUSG00000006731.11	B4galnt1	0.514829	6.59357	69.5807	1.9102e-08	6.26166e-07	113.96	130.699	114.672	118.614	108.716	94.469	82.1904	75.552	77.2535	86.2977	75.7631
	ENSMUSG00000030678.8	Maz	0.510403	7.04542	99.5966	7.09858e-10	5.15801e-08	151.683	159.124	157.354	174.301	166.272	153.536	119.209	111.488	114.131	116.23	101.722
	ENSMUSG00000023009.15	Nckap5l	0.5076	4.7376	38.5971	2.32827e-06	2.73418e-05	27.7356	29.7013	34.116	27.62	32.9095	37.5707	21.9529	20.7057	23.0047	23.8826	21.6805
	ENSMUSG00000030403.10	Vasp	0.504978	7.08167	120.24	1.14926e-10	1.40153e-08	146.654	149.85	162.013	150.435	161.673	164.763	112.93	107.359	110.845	110.273	107.901
	ENSMUSG00000030122.13	Ptms	0.504871	8.59727	60.1172	6.78425e-08	1.65551e-06	396.13	442.159	451.323	486.524	453.332	485.421	353.12	285.991	316.526	334.245	304.346
	ENSMUSG00000046993.7	Gm5637	0.504802	2.82147	34.1876	5.61773e-06	5.68918e-05	7.11353	7.52611	9.61861	7.50835	7.97588	8.5475	5.59584	5.41581	5.96244	6.25453	5.09664
	ENSMUSG00000002870.9	Mcm2	0.504191	4.41726	65.0752	3.43268e-08	9.87831e-07	25.077	29.2981	26.0755	28.3351	27.1611	24.1754	17.9523	17.953	20	18.8381	19.2511
	ENSMUSG00000040734.15	Ppp1r13l	0.504015	3.32743	45.6351	6.47696e-07	9.67881e-06	12.1433	12.1627	13.451	13.6759	12.7901	9.56809	9.19135	8.49773	9.41314	7.87401	8.29195
	ENSMUSG00000028833.14	Ncdn	0.503876	5.22922	129.679	5.44991e-11	8.35947e-09	41.4597	43.4768	48.2433	43.7987	43.8314	44.8425	31.4987	28.8145	33.2629	31.3657	31.108
	ENSMUSG00000025384.16	Faap100	0.503493	4.49996	88.2193	2.2213e-09	1.17386e-07	24.3585	25.871	27.2778	28.2457	28.4545	28.7043	19.6741	18.4616	19.4836	18.9125	19.1982
	ENSMUSG00000022372.15	Sla	0.503492	5.54379	46.5407	5.5482e-07	8.53972e-06	55.9741	65.1815	52.7521	52.5585	52.1665	46.5009	34.0561	35.2776	39.3662	43.5956	38.687
	ENSMUSG00000028064.18	Sema4a	0.503433	6.03666	74.4651	1.04456e-08	3.89233e-07	74.6561	81.7793	79.9547	84.3796	76.669	71.5693	55.0975	48.1439	58.0985	60.4046	53.66
	ENSMUSG00000037992.17	Rara	0.502777	6.26567	74.5973	1.02808e-08	3.85563e-07	79.9015	83.6608	94.8335	92.603	85.579	92.045	64.4914	59.1849	62.1831	65.2072	59.6809
	ENSMUSG00000000555.9	Itga5	0.502117	6.31181	135.513	3.51611e-11	6.32139e-09	82.2727	82.8545	87.2438	89.3852	88.525	86.7507	57.8827	61.7283	61.6197	59.6787	63.2723
	ENSMUSG00000027952.17	Pmvk	0.501357	4.98554	47.075	5.06895e-07	7.94227e-06	36.7892	38.3025	36.2201	37.6312	40.7416	29.0232	25.6244	24.1168	26.9249	27.5683	24.3213
	ENSMUSG00000034412.14	Tbc1d10a	0.501338	5.3643	124.216	8.34445e-11	1.1623e-08	47.7828	46.7022	50.4977	51.754	48.1427	44.8425	35.4994	31.6571	34.7418	34.0276	34.4618
	ENSMUSG00000022175.10	Lrp10	0.500349	7.74841	144.739	1.81558e-11	3.90887e-09	223.968	242.18	268.87	256.982	250.342	249.727	182.991	176.059	175.962	174.755	169.166
	ENSMUSG00000052040.11	Klf13	0.500234	7.72876	95.9725	1.00871e-09	6.66319e-08	237.477	249.773	245.575	247.597	261.982	241.435	191.221	172.348	171.455	172.391	166.79
	ENSMUSG00000029687.17	Ezh2	0.500225	3.64949	35.3558	4.41899e-06	4.66482e-05	15.3049	17.0682	15.7805	15.6424	17.5326	14.097	9.95097	12.1781	11.3145	12.0809	10.6686
	ENSMUSG00000035206.11	Sppl2b	0.498898	5.16576	142.315	2.15223e-11	4.1703e-09	40.2382	41.864	43.434	49.6088	42.6099	42.6737	31.5241	29.6523	29.953	31.5147	30.7383
	ENSMUSG00000048807.3	Slc35e4	0.498699	4.83224	76.1445	8.54805e-09	3.35666e-07	35.2802	34.8083	33.3646	31.9999	34.9214	31.9574	24.9154	23.668	25.892	23.6779	21.1788
	ENSMUSG00000031636.8	Pdlim3	0.497865	3.85277	31.9353	9.05542e-06	8.34659e-05	19.1131	14.985	16.2314	16.5363	18.8978	17.2226	13.3946	12.5072	12.23	11.448	11.2232
	ENSMUSG00000042812.6	Foxf1	0.497501	8.05678	45.6688	6.43958e-07	9.64775e-06	262.77	281.221	314.333	274.055	288.569	327.293	203.704	191.708	215.282	212.822	208.461
	ENSMUSG00000048458.9	Inka2	0.497336	4.9701	46.9513	5.17575e-07	8.08057e-06	32.4061	32.5236	32.3125	35.3965	32.6221	39.6757	24.6116	25.7924	23.9671	23.6779	23.0009
	ENSMUSG00000044813.16	Shb	0.49666	5.07434	67.1551	2.60926e-08	7.96899e-07	38.2262	38.7729	41.4803	38.4356	36.5741	37.7621	28.0045	25.6428	26.8075	27.9406	28.124
	ENSMUSG00000031955.11	Bcar1	0.495778	6.11969	87.4816	2.40149e-09	1.23682e-07	75.0873	71.4309	83.9374	84.6478	78.9684	84.1354	56.2622	51.5549	57.0892	58.2826	59.2584
	ENSMUSG00000022623.18	Shank3	0.495542	8.07874	38.8612	2.21323e-06	2.6274e-05	267.081	299.969	362.426	303.016	325.789	327.675	228.442	209.541	218.451	230.803	227.474
	ENSMUSG00000043079.18	Synpo	0.494064	6.97827	91.5037	1.57948e-09	9.3689e-08	145.432	138.561	161.112	139.709	142.847	134.655	110.651	92.727	101.714	96.6288	108.456
	ENSMUSG00000033863.3	Klf9	0.493809	7.58731	31.5276	9.89417e-06	8.94476e-05	247.249	233.78	185.233	176.178	228.714	218.918	158.025	135.156	147.793	157.908	164.756
	ENSMUSG00000020190.14	Mknk2	0.49378	7.84752	72.9704	1.25232e-08	4.52156e-07	274.625	273.023	253.916	285.049	268.09	240.797	204.083	171.84	183.404	199.922	184.773
	ENSMUSG00000030103.12	Bhlhe40	0.493627	6.37748	35.7382	4.0895e-06	4.36723e-05	85.4342	78.621	71.839	64.5361	75.8068	72.3348	54.7177	48.9218	56.291	53.8895	51.7587
	ENSMUSG00000041120.7	Nbl1	0.493179	8.22157	108.475	3.13176e-10	2.8152e-08	353.521	358.431	369.34	358.256	323.921	332.842	256.294	243.801	260.751	235.401	244.824
	ENSMUSG00000089809.10	Rasgef1b	0.493082	5.34295	53.6792	1.75259e-07	3.44572e-06	45.1242	46.0303	40.804	42.5473	52.1665	40.8239	32.1571	32.046	31.8779	31.5891	30.7383
	ENSMUSG00000049686.15	Orai1	0.492217	4.92805	91.3107	1.61101e-09	9.43298e-08	33.0528	31.5828	37.3473	38.1675	34.8496	34.5089	22.8898	24.1168	26.0328	25.4649	25.4568
	ENSMUSG00000028982.10	Slc25a33	0.490669	2.91331	31.3419	1.03039e-05	9.24803e-05	8.4069	10.1468	9.31803	7.8659	8.62257	9.31294	6.76058	6.70244	6.47887	6.06839	5.88887
	ENSMUSG00000020235.17	Fzr1	0.48869	5.23087	87.4706	2.40427e-09	1.23682e-07	41.4597	43.4768	47.1162	50.5026	42.035	42.4185	31.4987	30.6397	32.1596	33.3203	30.7119
	ENSMUSG00000024777.11	Ppp2r5b	0.488497	5.6174	56.3119	1.17767e-07	2.55118e-06	56.549	53.086	66.654	59.5305	54.7533	57.7913	44.4882	41.5312	42.6056	40.2822	37.9211
	ENSMUSG00000023348.12	Trip6	0.487579	4.9792	87.5504	2.38403e-09	1.23682e-07	36.2143	30.5076	38.249	35.9328	34.0591	36.6777	26.2067	24.1767	25.2817	24.5342	25.536
	ENSMUSG00000030811.15	Fbxl19	0.487197	4.86606	54.2667	1.60188e-07	3.21835e-06	32.9809	31.1796	39.1508	33.2513	34.2029	35.2744	25.042	22.9798	24.6713	24.3108	25.4568
	ENSMUSG00000113949.2	Scamp4	0.486818	5.46968	93.989	1.22823e-09	7.81718e-08	51.4474	47.5758	53.0527	58.8154	52.3821	48.9248	40.133	35.5469	37.1596	38.8116	33.7224
	ENSMUSG00000034165.17	Ccnd3	0.486014	7.44669	116.185	1.60791e-10	1.82081e-08	190.7	203.944	215.818	202.279	197.169	203.545	148.632	145.987	153.591	145.567	128.182
	ENSMUSG00000015202.14	Cnksr3	0.485972	4.44932	55.6488	1.30004e-07	2.7282e-06	22.7058	23.4519	24.5725	24.0446	31.4724	24.5581	17.4205	16.5466	18.8498	18.261	18.6173
	ENSMUSG00000036285.11	Noa1	0.484442	3.41363	39.3301	2.02394e-06	2.43753e-05	12.0714	13.8427	14.4279	14.0335	11.7123	10.8438	8.25449	9.03632	9.97652	9.06535	9.40106
	ENSMUSG00000002603.16	Tgfb1	0.484161	6.24142	105.737	4.00611e-10	3.375e-08	77.4584	88.5662	92.4288	84.2008	85.5071	85.8577	60.4907	60.5912	60.9624	63.0852	61.0805
	ENSMUSG00000029028.15	Lrrc47	0.483339	5.69767	100.491	6.51957e-10	4.83649e-08	55.3993	60.6121	61.995	68.469	61.2921	55.1122	43.7286	39.9154	43.7558	45.1778	43.4403
	ENSMUSG00000020439.18	Smtn	0.483075	6.33829	34.7784	4.97241e-06	5.14927e-05	93.0507	80.7713	92.6543	87.1505	99.0158	105.504	72.442	62.596	64.2018	69.4514	64.1174
	ENSMUSG00000073775.5	Kti12	0.483033	4.16842	72.7152	1.29208e-08	4.61924e-07	21.4843	20.3608	21.9425	21.0055	20.3349	19.7103	16.1292	14.6616	14.6244	14.2588	14.7354
	ENSMUSG00000009293.18	Ube2g2	0.482895	5.90099	116.379	1.58197e-10	1.80313e-08	64.6685	64.2408	71.0124	75.4411	77.8187	66.3388	51.9071	48.5029	50.9389	50.3155	48.2993
	ENSMUSG00000059195.11	Gm12715	0.480335	7.01328	42.9261	1.04234e-06	1.42362e-05	139.181	135.403	154.424	167.329	138.752	141.289	100.472	88.8372	114.155	113.438	106.211
	ENSMUSG00000005566.15	Trim28	0.480277	6.79175	125.049	7.81124e-11	1.10748e-08	126.032	121.695	138.343	145.787	130.632	122.918	94.0404	94.4026	94.2957	93.334	92.9015
	ENSMUSG00000022091.7	Sorbs3	0.480081	7.95426	55.5345	1.32247e-07	2.76804e-06	298.984	280.281	311.929	264.848	273.982	265.036	224.644	196.346	205.469	205.878	180.337
	ENSMUSG00000037552.18	Plekhg2	0.480018	6.50054	81.2792	4.72756e-09	2.09781e-07	97.6494	101.334	107.308	103.508	111.087	107.609	73.1004	72.2008	75.9624	78.0141	76.1856
	ENSMUSG00000007476.19	Lrrc8a	0.479479	6.24547	64.2449	3.83692e-08	1.06548e-06	84.1409	84.8704	83.3362	96.3572	89.0999	77.7567	61.934	55.5046	62.8403	64.6674	62.9026
	ENSMUSG00000020211.16	Sf3a2	0.478955	5.51484	107.364	3.45874e-10	3.06178e-08	55.04	49.4573	53.729	49.6982	56.8371	48.1594	40.5128	35.3673	38.5915	37.6761	34.8843
	ENSMUSG00000070284.11	Gmppb	0.477959	4.33311	63.539	4.22139e-08	1.14312e-06	20.3346	22.3096	21.8673	22.0781	20.766	21.305	14.7112	14.7214	15.3756	15.4502	16.6895
	ENSMUSG00000038406.18	Scaf1	0.477202	7.03343	122.144	9.84782e-11	1.30103e-08	141.337	145.012	156.453	163.664	157.793	153.472	114.879	103.738	108.873	115.802	105.92
	ENSMUSG00000020424.4	Castor1	0.476241	3.43657	33.0775	7.0905e-06	6.83912e-05	12.2152	11.558	11.873	12.1564	11.4968	13.4591	9.82437	8.64734	7.6291	8.56275	8.95214
	ENSMUSG00000024807.19	Syvn1	0.475915	6.3409	140.776	2.40071e-11	4.55064e-09	87.0869	87.6255	97.163	92.9606	93.0519	86.368	66.1879	63.7629	65.6338	69.3025	61.0541
	ENSMUSG00000034957.11	Cebpa	0.475588	7.0981	41.7081	1.29948e-06	1.70389e-05	169.216	158.452	141.424	177.787	143.135	158.511	132.426	100.746	108.779	119.655	106.633
	ENSMUSG00000022561.14	Gpaa1	0.475432	5.31758	92.5086	1.42581e-09	8.78612e-08	47.8547	43.8127	51.4746	48.6255	44.4062	43.7581	32.8914	32.4649	35.1878	34.1207	32.9565
	ENSMUSG00000030609.19	Aen	0.47465	5.14977	56.257	1.18731e-07	2.56255e-06	36.7892	35.6147	38.5496	42.2792	39.8794	40.6963	28.1817	27.5578	28.2394	28.0151	28.124
	ENSMUSG00000028937.15	Acot7	0.473811	6.5316	31.7062	9.51683e-06	8.67089e-05	90.2484	94.5468	118.504	120.67	113.53	114.753	73.6321	74.056	80.2347	79.857	83.3948
	ENSMUSG00000040945.14	Rcc2	0.473701	6.50604	120.793	1.09861e-10	1.37832e-08	103.11	113.631	101.221	111.463	114.68	105.823	80.5952	74.2953	80.5868	83.6172	70.7985
	ENSMUSG00000042178.7	Armc5	0.473387	5.36788	82.2916	4.22116e-09	1.90214e-07	43.759	45.6271	48.7694	49.5194	48.0708	49.1162	32.7901	33.4523	36.3615	34.6978	33.5903
	ENSMUSG00000026558.14	Uck2	0.473333	4.79324	118.912	1.28152e-10	1.51003e-08	32.5498	30.978	33.8154	34.8602	36.2148	33.871	24.7888	23.8774	24.4131	24.6645	23.6083
	ENSMUSG00000012296.17	Tjap1	0.471708	5.0343	71.617	1.47954e-08	5.08909e-07	32.3342	35.8162	36.5207	40.7596	40.4542	39.6119	27.8526	26.4806	26.831	27.7359	26.5131
	ENSMUSG00000031934.15	Panx1	0.471453	3.20931	44.4972	7.891e-07	1.14105e-05	12.5744	11.8268	11.7227	10.7262	11.4249	9.69567	8.48238	8.3182	8.73239	7.61341	7.71099
	ENSMUSG00000049307.7	Fut4	0.470753	3.41247	34.2023	5.60062e-06	5.68506e-05	10.5625	10.9532	10.9712	11.7095	13.2931	13.204	7.6468	7.98907	8.89671	8.65583	9.32184
	ENSMUSG00000101188.2	Eif4a-ps4	0.470236	6.41094	84.7488	3.22087e-09	1.55162e-07	96.0686	93.942	108.811	95.4634	93.3393	89.8763	70.9481	71.6622	72.3004	68.4834	63.9325
	ENSMUSG00000030397.12	Mark4	0.470127	5.80879	86.5844	2.64228e-09	1.33176e-07	61.0039	64.0392	67.8563	62.9272	65.2441	63.5959	48.1343	44.643	45.0469	47.6722	45.8698
	ENSMUSG00000048696.12	Mex3d	0.469657	4.5131	31.0087	1.10863e-05	9.81388e-05	25.1488	24.0567	25.0986	26.9943	29.9634	30.4265	19.3449	18.8506	19.8826	19.5082	19.7264
	ENSMUSG00000020329.13	Polrmt	0.469583	4.71157	113.776	1.97219e-10	2.11e-08	29.8912	28.3573	32.0871	31.4636	31.0412	30.1076	22.4846	20.7955	21.9953	23.0077	21.707
	ENSMUSG00000049600.9	Zbtb45	0.469078	3.94783	48.8621	3.76581e-07	6.26641e-06	16.8857	17.2025	18.2603	18.0558	18.9697	18.1794	13.825	11.3403	13.9437	13.0303	12.5436
	ENSMUSG00000031375.18	Bgn	0.469069	10.503	38.9748	2.16567e-06	2.5797e-05	1512.67	1670.06	1893.81	1657.38	1585.47	1824.57	1234.4	1120.14	1198.29	1189.72	1364.4
	ENSMUSG00000057789.15	Bak1	0.467944	5.22555	95.7784	1.02818e-09	6.76621e-08	36.358	43.8799	42.2317	45.0501	45.1966	44.5873	32.1318	30.6696	31.1267	30.0813	31.0024
	ENSMUSG00000042423.10	Fbrs	0.466929	6.96353	134.489	3.79287e-11	6.61438e-09	137.6	150.589	142.927	136.491	153.41	142.692	106.903	100.836	104.859	108.784	99.3714
	ENSMUSG00000042292.19	Mrtfa	0.466599	5.85399	104.507	4.48248e-10	3.68425e-08	64.7403	67.3318	65.2262	71.4188	68.1183	69.273	50.16	44.7328	51.2441	50.3341	48.2993
	ENSMUSG00000060166.7	Zdhhc8	0.466078	6.1601	89.5337	1.93561e-09	1.0558e-07	81.2667	77.3443	84.5386	90.6366	84.1419	85.0922	61.6302	57.9881	60.892	62.8246	59.945
	ENSMUSG00000043445.8	Pgp	0.465845	5.23295	120.94	1.08554e-10	1.37179e-08	44.6931	43.208	45.3878	44.335	42.6817	42.0358	32.2837	30.7893	33.1455	32.0359	29.9461
	ENSMUSG00000024395.10	Lims2	0.465478	6.90432	61.413	5.65555e-08	1.44615e-06	133.073	136.612	147.06	131.486	138.895	139.375	116.196	90.7821	95.1408	103.256	93.4033
	ENSMUSG00000068566.14	Myadm	0.464645	8.50563	58.8951	8.07583e-08	1.89548e-06	375.149	395.39	423.67	404.289	415.895	481.849	293.288	291.137	332.605	315.202	275.192
	ENSMUSG00000041164.16	Zmiz2	0.46374	6.87549	107.118	3.53593e-10	3.11429e-08	120.14	136.008	139.395	149.631	141.985	129.361	101.409	92.2782	98.4976	104.391	96.5722
	ENSMUSG00000001525.11	Tubb5	0.463719	8.26879	31.711	9.50689e-06	8.66652e-05	328.3	362.597	398.721	426.099	358.196	350.447	260.928	279.049	295.493	287.597	220.74
	ENSMUSG00000032135.16	Mcam	0.463492	8.21535	41.4568	1.3607e-06	1.76819e-05	323.773	278.197	365.883	347.708	352.016	401.605	259.257	251.551	262.136	248.432	229.138
	ENSMUSG00000042303.20	Sgsm3	0.462715	5.17028	55.8272	1.2658e-07	2.68218e-06	41.316	40.3185	42.1566	45.7652	42.2506	36.7415	30.8657	29.383	29.1314	30.435	30.2894
	ENSMUSG00000072214.8	ENSMUSG00000072214.8	0.461425	3.77586	33.3217	6.7337e-06	6.56395e-05	16.3827	17.4041	18.8615	17.7876	15.7362	15.1176	13.6731	11.3702	13.7793	11.9692	10.4045
	ENSMUSG00000068758.9	Il3ra	0.457669	4.14054	33.3478	6.69677e-06	6.5316e-05	18.5383	20.2264	18.4858	22.1675	19.1134	17.4139	13.7237	11.9986	13.6854	14.8731	15.8973
	ENSMUSG00000032312.8	Csk	0.457205	6.60833	96.8312	9.27229e-10	6.2856e-08	101.098	113.429	111.892	122.011	112.812	111.947	83.7097	77.467	81.1971	87.8055	78.2454
	ENSMUSG00000021411.17	Pxdc1	0.456777	7.28818	45.2244	6.95281e-07	1.02748e-05	179.06	181.769	181.551	185.564	179.493	153.919	131.11	126.359	137.84	126.971	122.003
	ENSMUSG00000036225.16	Kctd1	0.456549	3.36505	48.1355	4.24551e-07	6.87441e-06	11.7122	13.5067	14.1273	11.2625	12.0716	12.1196	9.11539	8.61742	9.55398	9.69825	8.42399
	ENSMUSG00000044496.7	2510039O18Rik	0.456358	6.16901	74.6551	1.02096e-08	3.84545e-07	78.8955	76.9411	76.7986	96.8041	82.5611	81.8391	58.5157	57.2101	61.0563	63.5319	59.3112
	ENSMUSG00000020238.15	Ncln	0.45435	6.45437	71.7618	1.45322e-08	5.01836e-07	94.5597	98.5787	109.111	112.178	102.896	95.2982	78.8734	69.8669	76.6666	78.5354	68.369
	ENSMUSG00000030351.6	Tspan11	0.453921	6.22357	40.9337	1.49838e-06	1.91571e-05	84.8594	84.1984	87.9953	88.0444	90.6088	86.5593	61.301	66.4559	63.9201	66.5289	59.4697
	ENSMUSG00000018293.5	Pfn1	0.453731	8.49006	92.2625	1.46187e-09	8.91385e-08	388.801	446.46	422.918	423.328	418.698	376.728	312.962	293.292	319.46	301.39	279.919
	ENSMUSG00000109511.2	Nup62	0.452143	5.29003	85.7604	2.88671e-09	1.43341e-07	40.5256	48.651	44.4861	49.3406	46.5619	42.8651	32.6888	32.2555	34.6479	34.1952	32.0059
	ENSMUSG00000020737.13	Jpt1	0.45154	5.8901	63.7957	4.07695e-08	1.11439e-06	58.992	71.2965	72.5905	78.5696	68.6931	61.3634	52.7933	46.7974	51.1267	50.4272	49.3292
	ENSMUSG00000045980.14	Tmem104	0.4515	5.05026	92.4133	1.43966e-09	8.84024e-08	37.2203	38.5713	39.9022	39.8658	37.58	38.5275	29.3465	26.9294	28.7324	29.1134	26.962
	ENSMUSG00000033589.5	Reep4	0.451261	4.8077	75.9131	8.78569e-09	3.3972e-07	32.4779	32.7252	36.2201	34.0558	31.6879	30.6179	24.4343	23.3089	23.6385	24.8692	24.1893
	ENSMUSG00000045045.8	Lrfn4	0.450473	4.25297	53.7304	1.73888e-07	3.42648e-06	24.2866	21.8392	22.1679	23.0614	22.3468	22.5169	16.6103	15.2002	17.6995	16.2692	17.2441
	ENSMUSG00000020773.12	Trim47	0.449219	4.78005	42.4445	1.13671e-06	1.52486e-05	29.3882	29.3653	32.4628	32.6256	32.1191	26.6631	24.0545	19.0601	21.784	22.7658	23.6083
	ENSMUSG00000069899.4	Gm12166	0.448568	3.10705	33.6799	6.24519e-06	6.18104e-05	9.26915	8.93726	10.8209	10.8156	10.5626	8.5475	7.21635	7.21111	6.9953	7.12942	7.36769
	ENSMUSG00000095687.3	Rnaset2a	0.447176	5.02553	36.6514	3.40576e-06	3.7662e-05	34.418	38.9073	33.7403	37.8993	40.3824	27.7475	27.65	24.7751	24.5774	25.9116	27.1997
	ENSMUSG00000027459.17	Fam110a	0.445985	4.86957	52.9385	1.96494e-07	3.78636e-06	33.1965	34.3379	37.4224	36.8267	31.0412	33.6797	25.1433	24.5357	25.2817	25.8186	25.4304
	ENSMUSG00000030036.9	Mogs	0.445403	5.52045	63.2804	4.3726e-08	1.17857e-06	49.3636	53.086	58.5383	58.8154	59.352	47.075	41.2218	37.3422	40.9859	39.1839	40.6939
	ENSMUSG00000028693.16	Nasp	0.445359	4.26888	50.7399	2.77805e-07	4.99447e-06	21.4124	23.4519	23.5957	19.039	24.6462	20.1568	15.2936	16.6663	17.0892	15.9342	16.0558
	ENSMUSG00000046574.9	Prr12	0.445245	6.36524	87.9057	2.29603e-09	1.19524e-07	88.8114	94.1436	101.071	102.614	103.183	97.3394	73.4549	69.5976	72.1596	74.3843	69.6365
	ENSMUSG00000074247.11	Dda1	0.445229	5.82211	128.778	5.84029e-11	8.65813e-09	60.4291	62.8296	69.9604	64.8936	61.6514	66.8491	49.2737	47.336	48.6854	46.6298	44.6815
	ENSMUSG00000063229.16	Ldha	0.444844	7.84095	60.7259	6.22624e-08	1.56005e-06	252.135	244.128	264.587	286.837	247.396	221.788	196.411	178.482	191.056	185.719	176.719
	ENSMUSG00000005103.13	Wdr1	0.444368	7.62985	188.994	1.17995e-12	6.05209e-10	217.933	220.475	234.303	233.206	227.277	216.877	166.786	162.564	169.859	167.886	159.607
	ENSMUSG00000024810.17	Il33	0.44382	6.54685	38.6841	2.28968e-06	2.70161e-05	92.9789	119.074	98.8162	91.7092	102.321	113.159	66.593	76.1205	74.0845	88.3453	73.6241
	ENSMUSG00000005514.15	Por	0.441445	8.29957	79.2649	5.94267e-09	2.50324e-07	390.741	367.839	371.293	375.15	368.974	330.482	300.327	257.445	267.746	268.815	258.371
	ENSMUSG00000028796.18	Phc2	0.441237	7.11996	90.8566	1.68792e-09	9.68096e-08	147.3	146.558	168.476	152.849	148.236	163.168	117.867	109.902	112.606	114.406	113.895
	ENSMUSG00000021253.8	Tgfb3	0.440349	5.99349	36.781	3.31924e-06	3.67753e-05	70.2731	76.8067	77.7755	79.2846	73.1481	87.8351	60.3641	49.1612	56.0563	57.5566	62.4801
	ENSMUSG00000063382.7	Bcl9l	0.43967	7.54086	39.957	1.7978e-06	2.21881e-05	200.903	208.379	232.876	240.982	230.223	234.673	180.94	154.575	162.77	173.265	156.544
	ENSMUSG00000025857.11	Dnaaf5	0.439608	4.85971	48.8404	3.77924e-07	6.28277e-06	35.4958	36.085	32.9888	35.3965	33.9154	28.7681	25.5737	26.3909	26.5258	22.3749	23.6347
	ENSMUSG00000027134.5	Lpcat4	0.439606	4.02133	61.4789	5.60394e-08	1.43928e-06	19.5442	18.8153	22.1679	18.5027	18.2511	17.5415	14.3314	13.2253	14.9296	14.445	13.547
	ENSMUSG00000030602.14	Pak4	0.4396	6.19417	32.9299	7.31604e-06	7.01014e-05	74.5843	76.0003	100.394	89.2064	79.5432	94.2138	70.0366	64.87	63.568	63.0479	54.1882
	ENSMUSG00000068856.4	Sf3b4	0.439135	5.70594	103.809	4.78019e-10	3.84156e-08	58.6327	61.8217	60.8678	60.0668	55.8311	55.6863	45.9314	40.1847	45.1878	44.0796	41.4069
	ENSMUSG00000022436.17	Sh3bp1	0.437766	5.20415	50.4046	2.93145e-07	5.1638e-06	35.7114	46.4334	45.3878	46.4803	41.3883	40.1222	31.3215	27.2287	31.9483	32.8549	33.6431
	ENSMUSG00000040659.4	Efhd2	0.43743	6.8147	61.6274	5.4894e-08	1.41194e-06	115.541	132.446	129.926	139.798	124.74	115.008	97.0536	80.9978	94.6713	100.035	93.06
	ENSMUSG00000067925.5	Rtl8a	0.436803	6.88615	46.9594	5.16866e-07	8.07673e-06	126.391	131.573	142.175	146.77	134.297	143.394	112.98	97.8137	111.033	99.4583	86.2468
	ENSMUSG00000017314.13	Mpp2	0.435792	4.56648	64.0631	3.93215e-08	1.08673e-06	27.6637	28.4245	28.2547	28.5139	25.5084	29.9162	20.9654	21.5136	21.784	19.2104	20.2545
	ENSMUSG00000002968.10	Med25	0.434904	6.21304	105.816	3.97738e-10	3.36706e-08	83.3505	87.0879	85.8912	84.3796	89.9621	79.479	64.9218	59.8133	65.6572	62.7315	61.2918
	ENSMUSG00000009035.16	Tmem184b	0.434393	7.72736	64.18	3.87062e-08	1.07313e-06	198.46	218.593	258.65	237.318	223.828	255.085	184.055	168.159	174.108	169.71	162.3
	ENSMUSG00000031825.17	Crispld2	0.431678	7.34741	34.5136	5.25112e-06	5.40899e-05	179.706	161.879	197.332	170.189	194.798	196.529	143.01	124.923	128.122	131.792	152.107
	ENSMUSG00000007670.11	Khsrp	0.431145	6.83997	113.155	2.07995e-10	2.15906e-08	123.445	135.067	137.366	134.614	135.805	134.145	106.625	93.505	98.3802	102.623	93.5089
	ENSMUSG00000022614.9	Lmf2	0.431117	6.45221	84.8511	3.18524e-09	1.54493e-07	90.1766	100.729	109.787	101.631	96.7883	105.504	78.9747	71.9315	74.507	76.5064	71.7227
	ENSMUSG00000042608.16	Stk40	0.43091	6.5319	129.065	5.71311e-11	8.65813e-09	104.619	95.4204	97.4636	103.15	103.399	97.2118	76.0122	75.0134	76.4319	72.1319	72.0396
	ENSMUSG00000019261.4	Map1s	0.430346	5.62568	41.3767	1.38085e-06	1.78772e-05	52.6689	52.1452	56.8851	69.8992	56.6934	52.1142	41.4244	39.5564	43.7089	45.7363	39.6112
	ENSMUSG00000003348.11	Mob3a	0.430132	5.7144	49.4715	3.40878e-07	5.8166e-06	55.8304	62.0904	59.5152	67.3964	59.1365	53.1986	44.8933	45.7501	45.6103	44.8428	39.5848
	ENSMUSG00000049521.3	Cdc42ep1	0.42952	7.85217	37.9791	2.62368e-06	3.01762e-05	240.495	232.57	289.836	265.742	241.145	293.166	210.034	185.963	201.526	200.182	169.298
	ENSMUSG00000060860.9	Ube2s	0.428495	5.67902	49.637	3.31834e-07	5.71824e-06	59.0639	59.201	64.5499	56.1339	62.7292	52.4969	45.0705	41.6509	43.8263	46.909	41.7238
	ENSMUSG00000004931.12	Apba3	0.427979	4.94471	55.2286	1.38468e-07	2.86106e-06	33.6276	31.65	37.9484	36.201	39.7357	34.5727	27.4475	25.194	27.723	27.7731	24.11
	ENSMUSG00000070643.12	Sox13	0.427319	7.12783	31.3926	1.01902e-05	9.17435e-05	137.528	140.375	176.517	179.932	150.608	162.083	120.45	120.405	113.591	121.089	111.123
	ENSMUSG00000030847.9	Bag3	0.426897	6.52877	64.332	3.79217e-08	1.05692e-06	104.619	97.3691	110.689	95.9103	107.351	93.1294	76.7972	71.5725	74.46	75.799	78.8792
	ENSMUSG00000024858.15	Grk2	0.426575	7.22662	94.1444	1.20928e-09	7.74149e-08	163.97	175.587	174.187	195.307	176.26	156.981	133.009	128.214	129.178	134.677	120.92
	ENSMUSG00000035890.10	Rnf126	0.426574	4.74113	61.2014	5.82502e-08	1.48296e-06	29.3164	32.3892	29.7576	33.6088	30.8975	27.6199	24.333	21.7231	22.3944	21.9095	23.3706
	ENSMUSG00000002984.18	Tomm40	0.426296	4.8117	40.3872	1.65858e-06	2.08687e-05	29.6038	28.8949	33.8906	38.6144	30.682	30.6817	25.5737	23.5483	22.8404	24.4783	22.6048
	ENSMUSG00000020806.16	Rhbdf2	0.425428	6.10724	79.825	5.57392e-09	2.38244e-07	72.8598	71.3637	81.0819	79.7316	74.8008	83.6889	57.9334	54.6967	59.1784	60.4046	55.2973
	ENSMUSG00000035697.15	Arhgap45	0.424049	7.3303	31.4698	1.00197e-05	9.03948e-05	176.976	208.715	182.077	203.798	196.235	165.719	145.492	134.348	144.601	158.206	121.131
	ENSMUSG00000024927.9	Rela	0.423491	7.00166	109.407	2.88323e-10	2.69497e-08	133.433	138.83	155.551	143.016	146.512	137.206	111.537	104.666	107.676	103.889	103.148
	ENSMUSG00000018507.17	Trpv2	0.422956	4.5273	40.0016	1.78279e-06	2.20185e-05	27.8074	27.6182	27.8038	29.229	21.7001	24.2392	19.5728	19.7183	20.0235	19.3593	19.6736
	ENSMUSG00000023990.19	Tfeb	0.422646	4.78377	46.8288	5.28398e-07	8.21738e-06	32.2624	30.7764	33.064	29.944	29.8916	31.7023	24.966	20.6459	23.8263	24.1432	23.0273
	ENSMUSG00000033434.16	Gtpbp6	0.421593	4.53259	31.2076	1.06118e-05	9.46111e-05	24.3585	21.5704	26.2257	29.7653	25.8677	26.089	21.0667	17.2348	19.2019	21.1463	16.8216
	ENSMUSG00000035621.14	Midn	0.420348	6.9703	58.4281	8.63794e-08	1.99784e-06	120.786	130.699	134.961	148.111	145.506	153.855	106.144	98.7114	105.61	107.686	101.035
	ENSMUSG00000033088.20	Triobp	0.418893	5.88312	48.2932	4.13604e-07	6.74728e-06	60.8602	61.2169	68.9835	71.5975	65.9627	63.4046	51.6539	49.1313	48.8263	48.212	46.3715
	ENSMUSG00000020087.6	Tysnd1	0.418844	4.6245	38.1037	2.56098e-06	2.95678e-05	29.6756	25.6694	29.3067	33.4301	27.9515	25.5787	21.3705	19.6286	21.5962	23.864	20.2017
	ENSMUSG00000050705.16	2310061I04Rik	0.418367	4.42283	66.6124	2.8011e-08	8.46593e-07	22.2028	24.5271	24.5725	24.7597	24.1432	22.2618	18.6866	16.4569	17.7465	18.5402	17.2969
	ENSMUSG00000010205.12	Raver1	0.417336	6.45683	154.307	9.4979e-12	2.75593e-09	99.2302	102.879	99.8682	100.469	99.3751	94.3414	76.0122	74.1756	74.8826	77.0648	69.795
	ENSMUSG00000016520.8	Lnx2	0.417003	5.77818	52.9504	1.96131e-07	3.78355e-06	59.495	58.7306	56.8851	56.7596	65.4597	71.8883	47.3494	43.8651	45.5399	46.8159	47.0317
	ENSMUSG00000041319.15	Thoc6	0.416759	3.3032	34.4735	5.29476e-06	5.44269e-05	10.9936	10.8188	12.0233	12.2458	11.856	10.5249	7.97597	7.71977	8.42722	8.93505	9.58592
	ENSMUSG00000011877.14	Git1	0.416383	7.04293	54.7356	1.4917e-07	3.04255e-06	136.81	136.142	165.996	161.966	142.991	154.301	118.905	114.929	109.601	112.582	104.706
	ENSMUSG00000034708.13	Grn	0.416205	8.21007	47.2064	4.95805e-07	7.79653e-06	276.278	302.657	323.05	320.893	301.143	285.576	240.494	216.213	218.85	229.072	225.309
	ENSMUSG00000031706.8	Rfx1	0.415529	5.31256	67.6935	2.43299e-08	7.61739e-07	43.3997	48.4494	41.6306	51.8434	45.1966	45.3528	34.6132	32.6145	34.8357	36.7454	33.3527
	ENSMUSG00000018921.12	Pelp1	0.415003	4.97482	86.0674	2.79288e-09	1.39157e-07	34.2024	35.8162	40.0525	35.039	38.7297	34.7003	28.3337	27.2885	27.3239	26.6562	26.9884
	ENSMUSG00000031832.16	Taf1c	0.414405	3.7981	43.4183	9.54602e-07	1.32542e-05	14.5145	15.993	16.3817	15.6424	16.4547	15.883	11.3436	11.9686	11.9718	11.5597	12.4907
	ENSMUSG00000061024.9	Rrs1	0.414061	4.51738	41.484	1.35392e-06	1.76333e-05	23.4962	28.6933	24.3471	25.4748	26.1551	22.7083	18.1295	16.8758	20.1174	20.1225	19.0134
	ENSMUSG00000047832.10	Cdca4	0.413911	4.46603	50.944	2.68899e-07	4.89491e-06	23.0651	25.6022	22.6188	27.2625	29.4604	25.196	17.6737	18.6711	20	19.1731	20.2545
	ENSMUSG00000034974.14	Dapk3	0.412706	4.88395	51.8201	2.34041e-07	4.37453e-06	32.1905	33.8003	34.1912	40.5809	32.9095	31.0644	27.3209	24.416	26.5023	25.5207	24.1628
	ENSMUSG00000059316.3	Slc27a4	0.412403	5.29259	37.829	2.70138e-06	3.08712e-05	43.3997	38.0338	49.7463	48.4468	47.4241	44.3322	35.626	33.0035	32.5352	34.977	33.5903
	ENSMUSG00000036752.5	Tubb4b	0.411886	8.58667	39.0601	2.13069e-06	2.55025e-05	420.92	440.748	468.607	517.183	445.212	380.236	362.514	341.764	365.352	324.361	279.946
	ENSMUSG00000041187.17	Prkd2	0.411694	6.58636	47.9847	4.3532e-07	6.99037e-06	100.308	108.658	114.972	122.726	112.596	105.696	90.8247	83.2718	80.7981	84.6782	76.793
	ENSMUSG00000052488.8	Cherp	0.411431	6.33853	120.459	1.12888e-10	1.39147e-08	86.0809	90.1118	93.1052	103.955	92.5489	89.1746	72.1382	68.4307	68.568	70.5124	67.8672
	ENSMUSG00000034254.18	Agpat1	0.411285	6.05164	76.8305	7.88372e-09	3.16056e-07	69.7701	79.293	76.3477	83.0388	83.6389	73.3554	65.4536	54.8164	58.8028	57.9289	54.505
	ENSMUSG00000027342.15	Pcna	0.411067	5.95184	40.4021	1.65399e-06	2.0826e-05	71.0635	76.8739	75.5211	77.1394	66.3938	61.6823	51.0462	55.1754	55.8216	53.8151	52.6301
	ENSMUSG00000025402.13	Nab2	0.410812	5.32513	62.3943	4.93683e-08	1.30747e-06	45.2679	43.208	43.0583	43.0837	46.0589	45.2252	33.2965	32.4649	33.6385	33.7484	33.5375
	ENSMUSG00000043889.7	Gm8399	0.410484	4.69933	30.9311	1.12776e-05	9.96304e-05	29.8193	29.3653	28.0292	31.553	27.0892	26.5355	19.8513	21.0648	23.2864	20.5506	23.2386
	ENSMUSG00000014470.5	Rnf166	0.410369	5.20858	82.991	3.90589e-09	1.78605e-07	44.6212	41.3264	41.5554	46.5697	43.3284	39.293	33.8029	29.6523	33.0986	32.8735	31.3193
	ENSMUSG00000021326.14	Trim27	0.410169	5.00947	91.832	1.52738e-09	9.18481e-08	34.4898	35.6147	38.6247	38.9719	37.8675	37.3793	27.5234	27.7373	28.9906	27.4008	28.0976
	ENSMUSG00000047676.7	Rpsa-ps10	0.410163	5.83641	41.4328	1.3667e-06	1.77204e-05	64.381	72.842	67.4054	70.3461	63.0166	53.964	48.0077	48.1139	52.5352	49.8687	47.0581
	ENSMUSG00000030339.8	Ltbr	0.409128	6.62552	93.8671	1.24332e-09	7.8571e-08	101.458	101.737	114.221	110.569	109.866	118.708	82.7728	79.771	82.4178	85.5531	81.4671
	ENSMUSG00000038644.15	Pold1	0.408988	4.60594	43.6212	9.20807e-07	1.29291e-05	24.574	29.8357	29.3067	31.8211	30.0353	24.4943	21.0667	19.7782	21.5962	23.1008	20.9675
	ENSMUSG00000022391.17	Rangap1	0.408727	5.96514	54.0284	1.66126e-07	3.29962e-06	67.1833	73.5812	79.4287	76.3349	74.5134	68.5713	53.6036	55.5644	58.0516	58.8782	49.6725
	ENSMUSG00000024212.10	Mllt1	0.408686	6.16612	111.876	2.32285e-10	2.34151e-08	79.6859	75.5299	88.0704	87.955	86.9442	80.4358	64.3141	60.6511	61.9248	63.5505	62.4009
	ENSMUSG00000047945.7	Marcksl1	0.40828	4.7648	33.3523	6.69034e-06	6.53066e-05	23.6399	26.879	29.6073	31.553	32.4783	28.6405	23.6747	20.7057	19.4836	22.0026	22.5256
	ENSMUSG00000026820.6	Ptges2	0.408029	3.98278	36.3708	3.6016e-06	3.9329e-05	19.7598	16.665	18.8615	18.8603	16.2392	18.881	14.6859	13.9135	13.6385	12.5835	13.8111
	ENSMUSG00000053716.10	Dusp7	0.406737	6.98218	76.7431	7.96512e-09	3.17858e-07	134.295	147.23	130.603	134.882	145.362	142.246	106.903	103.499	106.455	104.261	103.597
	ENSMUSG00000033715.16	Akr1c14	0.406429	5.59809	34.4005	5.37523e-06	5.50109e-05	60.2135	62.0233	53.5035	51.1283	50.7295	50.9023	39.0949	39.9753	47.2535	41.6783	38.5549
	ENSMUSG00000010047.13	Hyal2	0.405818	6.65347	34.9728	4.77815e-06	4.98362e-05	107.709	107.919	129.325	125.765	108.141	115.2	96.0408	83.4513	87.2769	91.4726	78.0869
	ENSMUSG00000063696.8	Gm8730	0.405765	5.2929	36.2772	3.6696e-06	3.99465e-05	43.6871	49.0541	43.5092	50.7708	47.5678	37.1242	36.2084	32.2854	34.6244	33.9532	33.6167
	ENSMUSG00000031451.7	Gas6	0.405496	8.42032	61.1355	5.87894e-08	1.49233e-06	399.076	386.99	417.959	417.518	360.495	390.187	309.341	282.55	285.892	285.326	329.301
	ENSMUSG00000000282.13	Mnt	0.404165	5.69891	45.8336	6.25985e-07	9.42787e-06	54.8245	53.1532	59.3649	57.7428	63.1603	54.9208	44.8427	41.98	43.1925	45.7735	40.1658
	ENSMUSG00000042165.9	ENSMUSG00000042165.9	0.403941	4.23754	43.8889	8.78195e-07	1.24917e-05	21.628	18.2105	23.8211	21.9888	19.2571	18.8172	14.9644	16.3372	16.4554	15.3199	14.7354
	ENSMUSG00000023915.6	Tnfrsf21	0.403312	5.23621	43.6559	9.15162e-07	1.29018e-05	41.4597	46.8366	36.5207	47.3741	42.8973	40.6963	32.8407	33.3925	32.1831	32.7432	29.9197
	ENSMUSG00000029449.12	Rhof	0.403025	3.8618	32.4701	8.07013e-06	7.59089e-05	17.6042	18.0761	15.5551	17.6089	18.323	15.1176	13.749	13.2253	12.5352	13.235	11.6721
	ENSMUSG00000007950.10	Abhd8	0.402795	4.52678	36.9827	3.18932e-06	3.56529e-05	27.3763	26.207	28.6304	30.8379	26.227	27.6199	24.2064	18.3719	21.1972	20.8298	20.4394
	ENSMUSG00000039201.11	Tbc1d25	0.402631	4.13409	39.2032	2.07336e-06	2.48675e-05	20.4065	19.3529	20.3644	22.7932	18.4667	17.6691	16.2305	15.3498	14.6009	15.0965	13.6263
	ENSMUSG00000028849.18	Map7d1	0.402506	7.88825	59.7889	7.10757e-08	1.70699e-06	239.992	261.667	296.674	278.435	269.455	302.033	218.238	195.508	211.174	213.659	200.512
	ENSMUSG00000073982.12	Rhog	0.402302	6.54157	58.1231	9.02795e-08	2.06884e-06	97.9368	99.1162	113.92	112.893	103.183	99.3806	79.6584	79.6513	78.5445	75.7245	81.2822
	ENSMUSG00000040007.9	Bahd1	0.401432	5.6998	80.7263	5.03162e-09	2.20591e-07	60.2135	58.5962	59.2146	62.9272	56.6934	55.4311	47.0709	44.7627	42.4178	43.2419	45.1832
	ENSMUSG00000033055.13	Ankrd54	0.401209	4.80142	48.5046	3.99406e-07	6.57098e-06	29.2445	33.1955	30.3587	37.6312	33.5562	29.3421	24.5609	22.9499	24.7418	25.074	24.4533
	ENSMUSG00000029071.17	Dvl1	0.400802	6.55687	68.9507	2.0697e-08	6.73386e-07	102.535	98.8475	110.389	119.687	112.74	104.93	83.102	75.6119	81.4319	85.7392	83.5797
	ENSMUSG00000026974.12	Zmynd19	0.40057	3.73778	41.7735	1.28406e-06	1.69002e-05	16.1671	15.2538	13.8268	14.2122	14.8021	14.7986	11.2676	11.6694	11.5728	10.0705	11.7249
	ENSMUSG00000051550.11	Zfp579	0.400455	5.93597	42.8393	1.0587e-06	1.4424e-05	60.7165	68.9446	63.7984	74.9048	72.3577	76.9912	53.5782	49.9391	50.3051	56.1233	53.6864
	ENSMUSG00000008140.19	Emc10	0.399422	6.42637	61.0197	5.97488e-08	1.51277e-06	88.9551	91.2541	107.608	104.223	96.0698	97.7221	76.8225	66.1267	76.1032	78.0514	72.779
	ENSMUSG00000045665.6	Mfsd5	0.398792	5.41363	49.0951	3.62476e-07	6.06642e-06	44.6931	43.9471	49.4457	53.7205	43.4721	47.7129	39.0189	33.9311	36.5023	34.4744	34.7522
	ENSMUSG00000036966.16	Spryd3	0.398587	5.72701	64.6249	3.64583e-08	1.03214e-06	58.9202	59.7385	70.2609	62.659	57.6275	56.3242	46.4378	44.0745	46.7371	48.5471	45.0776
	ENSMUSG00000029111.8	Nelfa	0.398346	4.9429	81.772	4.47328e-09	2.00539e-07	33.1246	35.2115	37.5727	35.3071	33.9873	36.4225	26.8144	25.5231	26.5258	29.1878	25.6681
	ENSMUSG00000049295.18	Zfp219	0.397963	5.94061	72.2921	1.36106e-08	4.78538e-07	63.9499	70.6917	69.2089	72.9383	72.2859	75.3328	51.5526	48.7423	56.2676	56.3466	55.4029
	ENSMUSG00000039041.16	Adrm1	0.397652	6.1454	86.7845	2.5864e-09	1.31499e-07	72.4287	80.301	72.7407	82.7707	81.7707	78.7773	60.4907	58.018	60.1643	60.4046	57.3835
	ENSMUSG00000022556.12	Hsf1	0.397458	5.90529	63.6111	4.18028e-08	1.13906e-06	62.6566	64.1736	75.8217	77.4969	67.3998	64.3614	53.8821	51.4352	50.4929	53.3125	51.2041
	ENSMUSG00000047824.14	Pygo2	0.395792	6.19797	143.591	1.96734e-11	4.03629e-09	79.1829	79.7634	87.6195	87.5081	87.3754	83.1786	66.2132	62.8054	64.5774	64.2579	61.6615
	ENSMUSG00000038517.16	Tbkbp1	0.395689	6.39388	43.4328	9.52153e-07	1.32413e-05	82.9912	91.3885	95.3595	103.508	94.489	94.0225	74.8475	70.8843	70.1408	71.3129	68.501
	ENSMUSG00000020538.16	Srebf1	0.39396	7.13306	49.281	3.51631e-07	5.9362e-06	158.797	144.475	168.701	175.999	162.751	165.719	129.869	117.353	131.361	128.516	111.941
	ENSMUSG00000047423.11	AI837181	0.393602	5.60675	97.5313	8.66093e-10	5.99824e-08	51.2318	49.1885	56.2088	55.687	48.9331	52.7521	42.3866	39.1674	38.8967	40.5986	38.0004
	ENSMUSG00000055652.15	Klhl25	0.393507	5.00597	36.5079	3.50447e-06	3.85337e-05	33.6995	35.2115	42.0814	42.9943	35.2088	40.6963	29.2959	28.0365	29.9061	29.5229	28.9162
	ENSMUSG00000018678.14	Sp2	0.392812	5.44184	80.5057	5.15884e-09	2.24352e-07	42.753	49.9949	48.7694	49.6982	47.6397	50.5195	37.2971	34.2004	35.1173	39.0536	37.9211
	ENSMUSG00000063802.6	Hspbp1	0.392488	4.57026	41.9096	1.25257e-06	1.65482e-05	26.7296	26.4086	30.1333	28.4245	26.6581	22.8996	21.9023	19.2695	20.2347	20.8112	19.9905
	ENSMUSG00000013858.15	Tmem259	0.392078	7.02377	77.7953	7.04246e-09	2.8926e-07	138.103	142.929	151.794	139.709	149.099	151.814	110.904	99.4893	113.052	117.459	113.711
	ENSMUSG00000040212.13	Emp3	0.391604	5.22073	52.0118	2.27086e-07	4.27201e-06	40.31	44.0815	39.9774	46.0334	44.9811	39.7395	34.1321	29.9814	34.108	33.525	30.1309
	ENSMUSG00000015461.16	Atf6b	0.390997	5.86318	53.0944	1.91804e-07	3.72066e-06	59.3513	62.0233	78.3015	65.3406	64.7411	70.6125	51.8311	48.9218	53.3802	53.3869	46.8205
	ENSMUSG00000074766.11	Ism1	0.39089	6.5343	33.7659	6.1338e-06	6.08615e-05	101.961	99.1834	116.25	95.7315	98.441	109.14	80.8738	78.9631	82.7464	76.0224	75.9743
	ENSMUSG00000045598.11	Zfp553	0.389606	4.37724	56.4969	1.14581e-07	2.4946e-06	23.2088	23.8551	22.3182	25.7429	23.1372	23.7289	18.2308	18.1026	17.4178	19.0056	17.4818
	ENSMUSG00000030357.11	Fkbp4	0.389386	7.17257	38.1591	2.53362e-06	2.9319e-05	158.15	164.096	182.002	194.681	167.062	150.984	136.579	124.983	138.38	129.242	117.513
	ENSMUSG00000025793.18	Hgs	0.388956	6.2385	68.8124	2.10661e-08	6.84117e-07	84.5001	85.5424	92.3537	90.4578	83.1359	74.9501	70.1885	64.3913	62.0657	65.3562	62.9818
	ENSMUSG00000021262.16	Evl	0.388646	5.15764	31.5855	9.77002e-06	8.86915e-05	30.466	37.2946	37.1218	42.6367	40.2387	45.0338	31.2709	27.857	29.507	31.4216	28.0183
	ENSMUSG00000002458.14	Rgs19	0.388639	4.68642	48.7186	3.85569e-07	6.3855e-06	28.0949	29.1637	29.3067	30.391	34.131	26.1528	22.2061	22.7703	24.0141	22.561	21.1788
	ENSMUSG00000044562.13	Rasip1	0.388326	7.34889	39.3373	2.02114e-06	2.43753e-05	164.761	166.045	194.852	189.407	178.343	186.323	138.554	137.191	139.084	142.979	129.502
	ENSMUSG00000027339.16	Rassf2	0.387937	5.97316	31.2762	1.04533e-05	9.36169e-05	78.7518	77.7475	58.8388	72.2232	78.2498	61.4272	56.9205	54.577	53.7089	56.0116	50.808
	ENSMUSG00000039483.11	Asb6	0.387633	5.0012	53.7912	1.72272e-07	3.39848e-06	33.9869	36.085	35.9195	39.5976	37.077	35.8485	29.3212	25.0444	29.6244	26.9727	28.0976
	ENSMUSG00000037103.9	Dcaf15	0.387353	4.59389	53.3522	1.84311e-07	3.60741e-06	28.3823	26.879	26.4512	28.6033	25.0773	27.6199	19.6487	19.6585	22.3005	21.0718	21.0996
	ENSMUSG00000042492.13	Tbc1d10b	0.38728	5.86041	65.5304	3.23087e-08	9.39053e-07	60.7884	63.636	66.654	70.078	68.4057	66.9129	48.8686	48.3234	53.4507	50.9484	50.8872
	ENSMUSG00000000378.16	Ccm2	0.387223	5.22718	66.5071	2.84006e-08	8.51307e-07	39.0166	41.3936	39.9774	46.3909	41.4602	39.6119	30.9923	30.0413	32.8169	32.3151	31.5569
	ENSMUSG00000109336.2	Samd4b	0.387041	6.65346	84.948	3.15187e-09	1.53535e-07	106.847	109.061	115.574	123.083	114.824	109.012	89.2295	85.2466	83.8262	86.9678	86.8806
	ENSMUSG00000024037.14	Wdr4	0.386975	4.51498	36.8162	3.29619e-06	3.66021e-05	22.3465	24.8631	27.3529	30.9273	26.5144	25.7063	20.459	18.0726	20.7277	19.9177	21.126
	ENSMUSG00000001627.13	Ifrd1	0.386858	5.68325	31.7258	9.47629e-06	8.64575e-05	56.6927	53.8252	55.9833	48.9831	51.3761	50.7109	39.576	39.3768	42.5587	40.9709	39.9281
	ENSMUSG00000037966.16	Ninj1	0.386778	4.62378	33.9706	5.87708e-06	5.88349e-05	25.2207	28.9621	31.4859	26.1899	26.2988	24.877	23.2189	17.8333	21.0798	20.048	21.6805
	ENSMUSG00000020869.9	Lrrc59	0.386428	6.7446	59.4542	7.45451e-08	1.77838e-06	108.787	107.247	130.152	123.352	118.273	108.63	87.9382	88.2986	90.9624	86.8189	89.8119
	ENSMUSG00000029599.14	Ddx54	0.386266	5.99308	99.2222	7.35736e-10	5.30186e-08	69.6264	67.1975	73.7176	77.3182	74.226	68.1886	55.6545	54.2479	55.0939	55.993	53.1583
	ENSMUSG00000001911.17	Nfix	0.386021	7.71508	55.7758	1.27557e-07	2.69305e-06	221.525	213.957	240.24	238.301	235.181	255.213	202.362	162.235	177.981	183.243	169.694
	ENSMUSG00000033128.10	Gga1	0.385812	6.732	97.6901	8.52841e-10	5.94908e-08	118.703	118.536	126.921	128.446	120.429	109.778	96.294	87.0719	92.1126	92.9059	92.4262
	ENSMUSG00000034684.13	Sema3f	0.385424	7.88757	48.2006	4.19993e-07	6.83233e-06	239.273	246.749	289.235	304.178	269.096	293.804	213.756	203.796	208.451	207.516	214.085
	ENSMUSG00000025198.17	Erlin1	0.383962	5.03276	46.6109	5.4825e-07	8.4685e-06	39.5915	37.2946	33.5148	38.9719	37.5082	31.0644	28.283	27.2287	27.2066	27.587	28.7577
	ENSMUSG00000002608.9	Ccdc97	0.383168	5.98087	130.569	5.09228e-11	8.13408e-09	66.8241	72.2373	70.9373	72.1338	73.3637	73.2916	58.2625	52.4526	54.4601	55.5834	53.1847
	ENSMUSG00000038502.18	Ptov1	0.383044	6.67044	54.1037	1.64225e-07	3.28055e-06	116.619	102.207	118.504	129.519	112.381	109.778	91.1033	85.0073	87.2535	90.244	86.4053
	ENSMUSG00000029718.15	Pcolce	0.381217	7.40759	33.3058	6.75637e-06	6.57767e-05	176.114	171.286	232.35	193.161	184.451	208.967	156.734	136.323	150.141	148.489	154.484
	ENSMUSG00000026355.12	Mcm6	0.379775	5.22902	32.7732	7.56409e-06	7.18856e-05	40.8848	48.9197	42.7577	47.0166	43.6877	36.5501	30.5619	33.6917	34.9765	33.6181	33.4055
	ENSMUSG00000027488.13	Snta1	0.379568	4.32123	33.6178	6.32703e-06	6.24785e-05	24.2866	22.5111	22.3182	25.8323	19.6163	21.1774	18.9651	15.649	16.4319	17.6281	18.1155
	ENSMUSG00000047123.9	Ticam1	0.378742	4.5366	48.9358	3.72054e-07	6.20292e-06	24.2147	24.3255	27.1275	26.5474	27.3048	24.3667	20.6362	19.2695	19.108	19.8619	19.6736
	ENSMUSG00000022500.16	Litaf	0.378288	6.4286	40.1717	1.72681e-06	2.15534e-05	85.5061	91.3885	104.978	90.6366	86.0101	99.1892	70.6696	66.4858	73.122	71.5921	75.6838
	ENSMUSG00000079334.9	Naa80	0.378284	5.59178	32.9588	7.27128e-06	6.97845e-05	47.9265	56.7147	57.7868	55.8657	57.1964	50.5833	44.3362	39.0477	40.4695	45.7921	39.2151
	ENSMUSG00000001034.18	Mapk7	0.378026	5.40591	40.0335	1.77215e-06	2.19337e-05	42.3938	45.1567	46.8907	50.4132	46.3463	53.071	38.7404	36.2051	37.3943	37.8623	32.0059
	ENSMUSG00000036733.17	Rbm42	0.377566	6.04449	67.4267	2.51868e-08	7.78782e-07	74.8717	74.7236	76.498	73.8322	75.1601	65.382	59.1994	53.3801	58.8497	57.6683	53.2903
	ENSMUSG00000031823.15	Zdhhc7	0.377451	5.61815	40.0473	1.76756e-06	2.19235e-05	54.0341	50.9357	56.2839	64.8043	52.6695	53.8365	44.9439	39.5264	45.4225	42.5159	40.6147
	ENSMUSG00000032640.11	Chsy1	0.377079	5.762	47.5169	4.70646e-07	7.47504e-06	59.9261	64.7111	60.6423	55.3294	61.1484	70.3574	41.7536	48.6525	49.9061	48.6402	50.0422
	ENSMUSG00000059995.13	Atxn7l3	0.376931	6.35466	100.914	6.26383e-10	4.7228e-08	93.4819	88.7006	92.7294	94.3907	89.8903	93.1932	73.5815	69.3583	71.9718	70.3263	69.1876
	ENSMUSG00000035203.17	Epn1	0.375947	7.02184	100.45	6.54517e-10	4.83649e-08	140.402	143.332	154.724	153.206	147.877	144.67	116.778	109.184	114.742	119.134	107.822
	ENSMUSG00000034928.17	Rnf44	0.37589	7.45641	79.8499	5.5581e-09	2.38152e-07	185.886	196.284	187.262	203.888	208.235	207.436	158.836	143.265	152.512	161.985	146.878
	ENSMUSG00000025499.19	Hras	0.375873	5.56735	35.7401	4.08796e-06	4.36723e-05	48.5732	49.5245	57.862	64.6255	50.945	47.9042	44.1843	40.9926	42.4648	38.5882	38.5813
	ENSMUSG00000028670.15	Lypla2	0.375212	6.02784	77.6654	7.14983e-09	2.92004e-07	70.9916	78.5538	77.7755	71.6869	74.1541	67.0404	58.6677	52.273	58.7558	57.7428	55.2973
	ENSMUSG00000029598.13	Plbd2	0.375169	6.52551	59.9227	6.97378e-08	1.6821e-06	90.1766	99.9898	112.117	106.994	98.3691	105.823	75.5565	76.8686	80.6337	79.2799	81.7312
	ENSMUSG00000027613.16	Eif6	0.375047	5.598	49.4871	3.40013e-07	5.81323e-06	52.2377	51.2045	54.1047	60.1562	53.4599	45.7993	42.26	38.4493	39.6479	42.4787	40.5091
	ENSMUSG00000030216.13	Wbp11	0.374703	6.17735	70.9326	1.61119e-08	5.45637e-07	84.5001	84.5344	85.8912	79.6422	83.0641	70.3574	65.9093	61.429	63.4272	63.0293	59.7601
	ENSMUSG00000029730.17	Mcm7	0.374638	4.95063	48.0543	4.30312e-07	6.9355e-06	36.5018	38.1682	35.7692	36.8267	35.7118	30.8093	28.1058	27.079	26.4319	29.3367	26.3283
	ENSMUSG00000024949.18	Sf1	0.374343	7.89986	107.606	3.38425e-10	3.01112e-08	260.039	267.311	269.171	272.178	278.078	248.388	214.11	196.854	204.366	207.368	202.704
	ENSMUSG00000020918.15	Kat2a	0.373875	5.27567	48.6844	3.87746e-07	6.40332e-06	38.2981	41.3264	46.5901	41.5641	40.3824	41.3342	33.5497	29.8318	32.4648	32.7432	31.7682
	ENSMUSG00000033016.17	Nfatc1	0.373321	6.10303	60.1484	6.75433e-08	1.65551e-06	78.8237	80.4354	85.816	80.4467	73.5793	76.0982	63.6305	59.8133	61.9953	62.8059	57.3571
	ENSMUSG00000040345.11	Arhgap9	0.372918	4.79871	31.2151	1.05943e-05	9.45037e-05	30.8253	35.1443	34.9426	32.268	30.7538	29.98	24.7635	23.668	26.6666	26.9913	22.5784
	ENSMUSG00000001910.6	Nacc1	0.372855	6.81909	84.1314	3.4453e-09	1.63268e-07	117.194	124.786	139.921	141.407	128.764	123.301	103.941	97.0058	100.422	101.673	95.7271
	ENSMUSG00000055799.14	Tcf7l1	0.371902	5.25956	37.0199	3.16598e-06	3.54869e-05	37.1484	40.6545	46.0641	46.4803	43.1128	47.968	35.6513	30.3405	32.1831	35.6285	34.409
	ENSMUSG00000029033.17	Acap3	0.370417	5.25358	33.4456	6.56022e-06	6.44165e-05	37.364	42.8048	42.5323	39.5976	42.538	42.4823	30.8151	31.4476	32.1361	33.5623	31.4777
	ENSMUSG00000006445.4	Epha2	0.369405	6.5213	47.3841	4.81233e-07	7.60165e-06	93.6974	97.0331	91.3768	95.1952	96.6446	104.037	73.9359	72.4701	81.4084	73.8258	71.2474
	ENSMUSG00000004642.14	Slbp	0.368497	4.73257	32.2633	8.43654e-06	7.86344e-05	28.5978	34.6739	27.3529	28.6033	29.8916	31.1282	19.4968	24.3562	23.9202	25.1671	23.4763
	ENSMUSG00000060216.16	Arrb2	0.36766	5.32894	41.4896	1.35253e-06	1.76284e-05	43.1842	49.4573	46.9659	53.8099	46.2745	41.3979	36.9173	33.3327	36.4554	37.7878	36.7592
	ENSMUSG00000044030.5	Irf2bp1	0.367146	5.52839	64.3285	3.79396e-08	1.05692e-06	50.4414	52.3468	49.5208	54.3462	52.0947	49.6903	41.6523	38.4792	38.122	41.1198	39.7961
	ENSMUSG00000029723.17	Spacdr	0.365961	6.25729	56.3636	1.16867e-07	2.53804e-06	84.1409	82.7873	93.9318	82.5025	90.1777	81.2012	72.594	60.7708	65.1643	68.1297	66.0979
	ENSMUSG00000025132.14	Arhgdia	0.365653	9.24236	76.0171	8.67794e-09	3.378e-07	650.205	644.356	704.188	739.126	666.668	644.953	545.759	509.056	539.366	532.064	492.632
	ENSMUSG00000017132.18	Cyth1	0.364498	5.91506	90.7004	1.71529e-09	9.68096e-08	67.3989	68.8774	66.7291	67.307	63.6633	58.9394	51.426	52.2132	49.5305	50.7064	50.3855
	ENSMUSG00000031995.10	St14	0.364101	5.78467	34.8738	4.87604e-06	5.06452e-05	55.6149	52.0108	63.1221	59.0836	59.4239	55.176	44.5135	45.4509	45.1643	46.4436	41.2749
	ENSMUSG00000003344.16	Btbd2	0.363817	5.72535	37.5287	2.86455e-06	3.23961e-05	55.6149	61.9561	61.0181	69.8098	58.0586	51.7315	48.4888	43.6556	46.5258	49.5895	43.3083
	ENSMUSG00000049643.16	2310022A10Rik	0.363305	4.27313	50.551	2.86338e-07	5.0798e-06	23.2088	20.6968	20.8153	22.7932	22.2031	19.7741	16.7622	16.427	17.0422	16.9766	16.5839
	ENSMUSG00000030019.7	Fbxl14	0.363174	5.71359	44.0166	8.5862e-07	1.22633e-05	54.9682	61.0153	52.7521	60.8713	58.1305	62.3202	45.8555	45.421	45.7981	49.5337	40.113
	ENSMUSG00000034786.18	Gpsm3	0.362847	4.94761	43.4928	9.42041e-07	1.31321e-05	33.6276	32.7924	36.1449	30.5697	37.58	34.19	28.3843	26.5405	25.399	27.0658	25.4568
	ENSMUSG00000118668.1	Rps6ka4	0.362419	5.58954	62.2036	5.06838e-08	1.33348e-06	49.8666	49.3229	58.6134	50.8602	52.8851	56.069	40.9686	39.6461	41.1033	44.2099	39.9017
	ENSMUSG00000033170.15	Card10	0.362159	6.70719	34.6732	5.08115e-06	5.24941e-05	111.302	110.741	128.123	129.877	114.177	122.472	100.32	85.6356	91.6197	98.8254	88.0161
	ENSMUSG00000058301.9	Upf1	0.361723	6.56596	63.8655	4.03859e-08	1.10737e-06	102.032	99.5194	110.839	114.86	107.998	102.506	87.5077	78.1552	83.5445	83.673	80.5164
	ENSMUSG00000039568.7	Ubald1	0.361345	5.99639	66.525	2.8334e-08	8.51307e-07	76.8118	73.3796	67.1048	70.5249	71.1362	63.0218	51.1221	52.6321	56.9953	55.9371	56.9609
	ENSMUSG00000034201.14	Gas2l1	0.36072	6.42599	61.7854	5.37027e-08	1.3895e-06	97.362	90.9182	99.5677	98.3237	90.8244	103.718	76.4933	77.6765	75.0234	77.1765	70.4816
	ENSMUSG00000034382.15	AI661453	0.360341	6.18024	35.3644	4.41126e-06	4.65948e-05	84.7157	81.5105	89.1976	77.4076	83.1359	71.8245	68.6946	57.4794	63.3098	66.5289	60.4995
	ENSMUSG00000003200.11	Sh3gl1	0.359912	5.76725	78.7023	6.33995e-09	2.64503e-07	58.0579	61.3513	62.8216	59.0836	61.2202	64.6803	50.008	45.7202	47.7699	47.0765	47.9296
	ENSMUSG00000037553.15	Zdhhc18	0.359285	6.9503	78.541	6.45912e-09	2.68832e-07	130.415	137.284	138.493	154.547	142.057	134.974	109.486	102.781	110.493	113.847	107.399
	ENSMUSG00000020288.14	Ahsa2	0.359025	5.57303	43.8765	8.80111e-07	1.25088e-05	52.094	54.6315	54.7059	54.2568	59.4957	48.0318	42.8677	42.5186	42.5352	42.9813	39.0039
	ENSMUSG00000025158.8	Rfng	0.358371	5.20952	50.8531	2.72829e-07	4.94066e-06	39.0166	41.2592	44.6364	38.7038	44.2625	44.2046	33.1193	31.0885	32.5821	32.7618	34.3825
	ENSMUSG00000003363.16	Pld3	0.358295	6.69126	50.832	2.73748e-07	4.94703e-06	105.553	116.924	123.088	123.888	110.872	107.928	89.1536	85.4561	88.4741	92.9431	91.185
	ENSMUSG00000016528.11	Mapkapk2	0.357398	7.48558	105.184	4.21332e-10	3.50175e-08	191.203	182.508	207.101	196.379	194.942	185.366	158.507	146.765	152.512	145.101	149.968
	ENSMUSG00000029713.16	Gnb2	0.357231	8.2801	72.8508	1.27079e-08	4.57878e-07	324.564	331.015	366.184	354.233	344.687	345.982	268.094	254.364	276.948	287.392	257.526
	ENSMUSG00000049807.17	Arhgap23	0.357047	6.87415	44.4061	8.01795e-07	1.15653e-05	125.098	125.928	137.291	136.312	129.842	143.84	109.663	101.135	103.005	105.452	100.111
	ENSMUSG00000008090.15	Fgfrl1	0.357006	4.84721	32.8713	7.40771e-06	7.07077e-05	32.6216	27.6182	34.7923	37.1842	32.1191	30.4265	28.1817	24.3861	24.4836	24.6645	24.7966
	ENSMUSG00000018559.17	Ctdnep1	0.356949	6.248	76.1084	8.5846e-09	3.35666e-07	80.4045	81.7793	86.7929	87.2399	83.5671	82.6683	70.2898	62.2968	62.3474	65.4865	66.4148
	ENSMUSG00000025034.10	Trim8	0.35649	7.17826	44.5826	7.77399e-07	1.12787e-05	146.797	153.748	166.672	167.24	164.907	173.757	127.261	116.604	125.868	134.808	128.736
	ENSMUSG00000049922.9	Slc35c1	0.355817	5.22217	60.1323	6.76974e-08	1.65551e-06	37.9388	41.864	42.908	42.8155	43.9751	39.293	34.1827	32.5547	33.9671	31.8125	29.4179
	ENSMUSG00000024862.17	Klc2	0.355781	5.05044	55.6758	1.29478e-07	2.72373e-06	37.9388	37.0258	39.8271	37.8993	38.9453	36.2312	31.1696	26.3011	31.4084	29.0017	30.4214
	ENSMUSG00000023075.10	Akirin1	0.355756	5.75605	43.2838	9.77762e-07	1.35327e-05	57.3394	64.1064	58.0874	56.2233	59.7113	62.958	42.4372	48.473	47.4648	51.0042	44.1005
	ENSMUSG00000042632.18	Pla2g6	0.355606	4.53756	33.4279	6.58463e-06	6.46198e-05	26.5859	27.0806	29.2316	28.8714	24.5025	25.4511	22.0289	21.9325	18.8498	20.7554	21.707
	ENSMUSG00000024065.9	Ehd3	0.355441	5.01623	58.5165	8.52834e-08	1.98037e-06	35.0647	38.7057	38.0236	38.7932	36.2866	36.2312	29.3212	29.5925	27.6995	28.6852	29.9989
	ENSMUSG00000041958.11	Pigs	0.355077	5.82645	60.8276	6.13797e-08	1.54236e-06	57.8423	70.1541	66.654	70.1674	63.5196	59.5135	52.5401	49.2809	51.9248	51.0787	47.6919
	ENSMUSG00000031848.16	Lsm4	0.354533	4.54664	34.3469	5.43523e-06	5.55598e-05	22.9214	26.9462	27.8038	29.3183	24.3588	22.8996	20.1805	19.449	21.7371	19.7874	19.1982
	ENSMUSG00000020282.19	Rhbdf1	0.354495	6.30468	64.125	3.89943e-08	1.0794e-06	86.0091	78.285	90.2496	98.2343	90.8963	91.471	72.6699	69.3583	70.7746	70.4752	65.3321
	ENSMUSG00000045252.12	Zfp574	0.354158	5.23244	32.2086	8.53642e-06	7.93532e-05	38.9448	41.2592	37.8733	49.6982	42.8973	41.6531	33.7776	29.9515	34.8357	33.7112	31.9531
	ENSMUSG00000025647.17	Shisa5	0.35406	8.72885	37.9146	2.65678e-06	3.04413e-05	369.544	429.795	420.739	421.183	433.643	362.12	323.926	306.158	329.202	333.687	295.764
	ENSMUSG00000038482.12	Tfdp1	0.353954	5.09154	51.2334	2.56797e-07	4.71886e-06	34.3461	43.208	41.0294	38.0781	38.083	40.5687	28.6375	31.0885	31.5493	33.4692	28.6785
	ENSMUSG00000001247.17	Lsr	0.35313	5.60951	55.7498	1.28053e-07	2.70027e-06	52.3815	50.7341	62.2204	54.078	52.2384	49.2438	42.6398	42.7879	40.7042	39.854	43.3083
	ENSMUSG00000022760.18	Thap7	0.353022	4.14223	43.8219	8.8865e-07	1.25891e-05	21.1969	20.1592	21.6419	18.5921	18.7541	18.1794	16.0532	14.2726	15.3286	15.264	16.399
	ENSMUSG00000056091.13	St3gal5	0.352626	5.03831	62.5016	4.86449e-08	1.29913e-06	36.1425	36.9586	38.0987	39.3295	37.2926	37.5069	30.8404	27.4979	30.0235	29.5229	29.0746
	ENSMUSG00000002250.17	Ppard	0.352418	5.50582	57.4444	9.96631e-08	2.25133e-06	47.9265	48.3822	53.3532	59.173	50.7295	49.18	42.0827	41.8603	38.8028	40.5056	38.0532
	ENSMUSG00000014551.9	Mrps25	0.350599	5.88604	39.3313	2.02347e-06	2.43753e-05	69.4108	67.735	64.0239	65.3406	67.1842	69.5919	52.3122	53.2904	60	53.5544	44.4174
	ENSMUSG00000024137.10	E4f1	0.349936	5.12215	45.6789	6.42836e-07	9.63923e-06	36.6455	37.1602	41.4803	43.9775	39.1608	36.3588	30.6632	26.72	30.5868	33.432	31.7946
	ENSMUSG00000078923.11	Ube2v1	0.349426	6.97066	67.1641	2.60621e-08	7.96899e-07	135.876	132.715	154.198	126.659	140.26	140.013	113.639	103.858	108.709	106.178	110.383
	ENSMUSG00000035632.17	Cnot3	0.348685	5.92386	73.1075	1.2315e-08	4.47421e-07	63.3032	67.735	71.313	72.6701	69.8428	66.2112	54.8696	52.0037	51.9718	55.7696	54.241
	ENSMUSG00000028049.16	Scamp3	0.34864	5.70421	106.928	3.59675e-10	3.13619e-08	60.0698	57.3866	58.914	61.3182	56.9808	59.7687	48.033	44.4934	48.2629	47.2999	43.7572
	ENSMUSG00000023011.9	Faim2	0.348534	5.31098	32.2153	8.52421e-06	7.9282e-05	41.8189	49.9277	46.4399	48.7149	44.047	44.2684	40.0571	32.6445	36.7371	34.3441	36.2575
	ENSMUSG00000006800.15	Sulf2	0.348384	5.82097	33.0819	7.08386e-06	6.83649e-05	59.7824	58.7306	62.8967	64.8043	61.8669	58.4292	51.1728	44.7029	48.0047	51.8047	43.9685
	ENSMUSG00000012114.18	Med15	0.34766	6.35835	61.4302	5.64202e-08	1.44481e-06	84.4283	83.9296	90.1745	98.86	93.9142	86.7507	72.8472	66.9047	71.0328	72.7834	68.5538
	ENSMUSG00000017715.12	Pgs1	0.347092	6.49861	48.4568	4.02571e-07	6.60436e-06	92.0448	91.4557	111.215	102.257	98.8003	98.0411	77.7847	74.1158	81.8075	81.6626	73.4656
	ENSMUSG00000026917.16	Wdr5	0.346983	5.48248	71.8907	1.43021e-08	4.9487e-07	53.4593	50.3309	46.6653	51.3071	50.442	46.9474	38.5378	39.4965	38.3568	40.1705	39.3736
	ENSMUSG00000030878.12	Cdr2	0.346578	5.26409	36.3905	3.58745e-06	3.92482e-05	44.9805	40.4529	44.6364	44.2457	43.8314	40.5687	36.1071	35.8162	32.4882	31.2913	33.8544
	ENSMUSG00000059796.17	Eif4a1	0.346338	8.02846	71.275	1.54379e-08	5.27133e-07	285.691	281.49	285.628	294.971	274.844	268.226	232.848	230.067	215.469	214.274	215.617
	ENSMUSG00000023004.9	Tuba1b	0.345868	9.20401	39.5722	1.93311e-06	2.3476e-05	617.871	647.044	738.679	733.495	684.129	608.913	548.974	525.663	558.427	540.85	468.39
	ENSMUSG00000041130.11	Zfp598	0.344661	6.58595	102.866	5.21644e-10	4.12473e-08	104.835	108.591	112.117	113.162	107.064	105.249	86.4443	81.5663	85.0938	86.5955	87.4088
	ENSMUSG00000024429.10	Gnl1	0.344527	5.89223	60.0564	6.84287e-08	1.66202e-06	62.441	57.3194	65.8274	67.8433	59.352	58.174	50.4385	46.0194	49.7417	49.2358	47.7711
	ENSMUSG00000025403.6	Shmt2	0.34201	4.81894	36.5818	3.45326e-06	3.80666e-05	27.2326	30.7092	34.642	34.5921	31.0412	31.1282	26.5612	22.7404	24.2488	26.3956	24.3477
	ENSMUSG00000025579.15	Gaa	0.341813	7.31201	50.2964	2.98286e-07	5.24377e-06	171.946	183.516	199.812	189.497	170.942	167.442	153.316	142.517	129.624	144.543	142.099
	ENSMUSG00000014859.10	E2f4	0.341304	5.86596	56.539	1.13868e-07	2.48771e-06	58.4172	63.4344	69.7349	72.9383	64.5974	62.5753	51.3247	50.6573	51.1502	54.1315	50.1214
	ENSMUSG00000037326.11	Capn15	0.340907	5.82765	42.9191	1.04365e-06	1.42411e-05	59.3513	56.9162	65.7522	69.0054	67.1842	62.8943	49.2231	45.2415	51.3849	53.0518	51.5738
	ENSMUSG00000068735.15	Trp53i11	0.340603	5.93287	32.6799	7.71608e-06	7.30379e-05	63.0877	65.3831	66.654	69.9886	64.2381	63.7235	56.8699	45.032	53.3802	49.7384	53.5016
	ENSMUSG00000028743.8	Akr7a5	0.340295	4.33595	39.0309	2.14258e-06	2.56096e-05	24.5022	22.1752	21.6419	23.7765	22.7061	21.1136	19.3449	15.8884	18.5211	17.4978	18.1155
	ENSMUSG00000007836.7	Hnrnpa0	0.34016	6.86024	34.0812	5.74327e-06	5.78607e-05	117.265	124.382	115.574	131.933	130.201	140.141	93.4328	94.9412	97.9812	110.888	102.646
	ENSMUSG00000046722.15	Cdc42se1	0.33943	7.10922	65.9844	3.04241e-08	8.97742e-07	164.473	160.938	154.349	151.776	155.925	140.651	126.375	120.853	121.878	120.605	121.554
	ENSMUSG00000038893.13	Fam117a	0.339264	5.38978	50.7469	2.77497e-07	4.99447e-06	49.8666	47.5086	47.1162	48.7149	46.0589	45.3528	39.1962	37.5516	38.8732	39.4631	32.2699
	ENSMUSG00000057342.16	Sphk2	0.339166	5.67404	33.5051	6.47862e-06	6.38309e-05	53.5311	56.7147	58.5383	66.0556	63.0885	59.2584	51.8818	45.5706	45.8216	50.241	41.539
	ENSMUSG00000050390.13	C77080	0.339101	6.56087	45.7848	6.31251e-07	9.47366e-06	108.571	100.393	109.412	102.882	107.638	100.975	83.8363	82.045	84.6244	80.8436	83.5797
	ENSMUSG00000021258.11	Ccnk	0.338048	5.1365	56.2608	1.18664e-07	2.56255e-06	36.6455	40.4529	39.0005	39.3295	43.4721	35.5933	31.2455	29.5326	30.0469	31.6077	32.0851
	ENSMUSG00000023191.10	P3h3	0.337821	5.65773	35.4629	4.3239e-06	4.58664e-05	55.3275	50.4653	62.1452	56.3127	52.0947	61.5547	46.4125	42.4887	45.0469	45.5874	43.2026
	ENSMUSG00000034259.9	Exosc4	0.337258	4.11533	32.6782	7.71884e-06	7.30379e-05	18.3946	18.1433	18.6361	22.0781	19.2571	17.6053	14.9138	14.3025	15.1174	15.2454	15.5276
	ENSMUSG00000032637.16	Atxn2l	0.33592	7.90204	83.4547	3.71099e-09	1.73968e-07	252.063	277.257	271.275	272.178	273.479	274.796	228.214	209.272	214.554	218.741	199.456
	ENSMUSG00000002249.22	Tead3	0.335728	5.35035	33.7764	6.12035e-06	6.08164e-05	44.4057	42.6704	42.6074	49.7875	45.0529	46.7561	38.5125	31.8964	35.9389	36.4289	36.1783
	ENSMUSG00000032583.8	Mon1a	0.335691	4.56855	46.5547	5.53507e-07	8.52704e-06	24.6459	26.1398	29.3067	25.1172	27.5204	25.8976	21.7757	21.3042	20.8685	19.4151	21.4429
	ENSMUSG00000016757.12	Ttll12	0.334869	4.55639	32.3983	8.19533e-06	7.68379e-05	24.8614	26.6102	30.2085	30.8379	26.3707	24.1754	21.016	20.1073	22.2066	20.3645	23.8724
	ENSMUSG00000028042.16	Zbtb7b	0.334845	6.18945	75.6181	9.09903e-09	3.48743e-07	76.8836	79.2258	79.3535	86.4355	80.6929	80.1168	66.9728	61.3692	65.8685	64.8349	59.7337
	ENSMUSG00000003199.17	Mpnd	0.334157	5.1538	32.2744	8.41651e-06	7.85455e-05	37.0047	41.528	43.5092	45.5864	39.0171	36.6777	33.5244	31.8366	29.953	33.3389	31.9795
	ENSMUSG00000026273.14	Mterf4	0.333905	5.7092	39.3995	1.99742e-06	2.41561e-05	55.9741	63.2328	64.2493	62.1227	58.849	55.3036	51.8818	44.9722	48.8497	46.9276	45.0776
	ENSMUSG00000033323.15	Ctdp1	0.333671	5.08517	73.9925	1.10588e-08	4.06867e-07	36.2862	36.1522	36.3704	37.1842	35.137	36.295	29.9289	28.4854	28.169	28.6666	28.4937
	ENSMUSG00000025409.15	Mbd6	0.333504	6.95232	51.2228	2.57228e-07	4.71886e-06	134.295	131.841	141.273	134.167	143.638	139.184	113.385	103.2	109.46	117.775	101.299
	ENSMUSG00000044147.9	Arf6	0.333209	6.54719	37.5289	2.86443e-06	3.23961e-05	88.021	103.484	98.6659	112.983	96.2135	104.484	79.709	77.9458	82.23	85.4228	73.9145
	ENSMUSG00000060279.15	Ap2a1	0.332084	6.44723	49.5941	3.3415e-07	5.74678e-06	97.8649	89.843	113.545	104.044	95.495	91.6623	80.1395	76.7788	79.7887	80.7877	74.4691
	ENSMUSG00000024187.16	Fam234a	0.33183	6.36855	41.1326	1.44433e-06	1.85191e-05	86.512	87.7599	93.1803	95.6421	86.3694	99.8271	75.5311	69.2386	73.568	71.4245	73.8881
	ENSMUSG00000003868.15	Ruvbl2	0.331688	5.32976	34.052	5.77829e-06	5.81128e-05	44.5494	44.6191	48.8445	53.5417	44.7655	39.3568	37.7782	34.9185	38.7793	35.3679	35.386
	ENSMUSG00000024843.16	Chka	0.331641	6.30819	43.493	9.42015e-07	1.31321e-05	90.8951	85.4752	84.6137	86.3461	94.1297	85.8577	67.859	74.4749	71.4553	70.6613	64.7512
	ENSMUSG00000027593.16	Raly	0.331489	7.058	57.8412	9.40559e-08	2.13573e-06	137.025	146.154	157.58	168.134	143.566	147.731	123.615	116.425	117.676	120.307	117.936
	ENSMUSG00000025651.15	Uqcrc1	0.330906	6.79688	35.0225	4.72981e-06	4.94386e-05	130.774	115.109	115.423	129.877	121.363	109.331	108.017	88.9569	93.9905	95.3072	91.7924
	ENSMUSG00000030824.18	Nucb1	0.330758	8.09272	65.8198	3.10933e-08	9.1132e-07	290.936	296.072	329.963	325.988	286.988	303.5	248.85	248.918	247.559	237.952	231.462
	ENSMUSG00000073838.11	Tufm	0.33073	5.1847	36.1819	3.74029e-06	4.05136e-05	41.7471	39.9153	40.0525	47.7317	40.3824	38.7189	37.1199	31.8964	31.1033	32.464	31.9002
	ENSMUSG00000057691.9	Zfp746	0.330665	5.57487	90.5807	1.73658e-09	9.7377e-08	55.3275	50.8685	52.9024	55.5976	55.8311	49.8179	43.2981	40.3343	42.5587	41.9389	44.0213
	ENSMUSG00000002844.10	Adprh	0.330573	5.71058	56.6883	1.11382e-07	2.45413e-06	57.8423	58.7306	62.8216	53.9886	57.1245	56.2604	48.5141	42.5186	47.9108	47.1696	43.6516
	ENSMUSG00000032185.16	Carm1	0.329451	5.9075	70.6415	1.671e-08	5.59319e-07	65.2433	67.2647	67.1048	69.4523	67.0405	63.7235	54.7683	47.1864	51.7371	55.5276	55.7726
	ENSMUSG00000068922.15	Msto1	0.329326	4.66555	65.4185	3.27927e-08	9.51533e-07	26.0829	29.1637	30.5842	27.7988	27.1611	28.194	22.5859	23.0396	22.7934	22.1515	21.5221
	ENSMUSG00000018819.11	Lsp1	0.329226	7.17823	31.528	9.89337e-06	8.94476e-05	152.977	183.113	167.499	177.966	164.547	139.12	131.844	123.187	131.948	137.73	128.552
	ENSMUSG00000039656.18	Rxrb	0.329139	5.96858	54.3457	1.58272e-07	3.189e-06	64.2373	70.5573	73.9431	68.7372	69.4835	69.6557	56.9712	51.1959	54.6713	57.8544	55.5878
	ENSMUSG00000018537.17	Pcgf2	0.329043	5.10423	42.5296	1.11938e-06	1.50741e-05	35.2084	37.6306	35.168	42.6367	38.4423	40.7601	31.7266	28.994	29.2723	31.0865	31.2929
	ENSMUSG00000031778.14	Cx3cl1	0.328739	6.58258	41.4934	1.35157e-06	1.76284e-05	99.5894	96.8315	101.521	105.653	108.141	110.862	86.0392	81.8356	75.399	81.1414	88.7291
	ENSMUSG00000031834.16	Pik3r2	0.328568	5.58047	37.6204	2.81362e-06	3.19445e-05	50.0103	54.7659	55.0816	61.1395	52.454	55.9414	46.5898	41.8005	44.6009	42.5904	42.8593
	ENSMUSG00000031862.12	Atp13a1	0.328348	6.07054	58.044	9.13226e-08	2.08452e-06	70.4168	72.9764	71.2378	81.4299	78.2498	73.8019	60.9972	56.1628	60	62.9735	57.0666
	ENSMUSG00000024906.11	Mus81	0.327182	4.35251	39.8429	1.83682e-06	2.25324e-05	25.5081	21.9736	26.6766	22.7038	23.7121	22.4531	19.6994	18.9404	18.662	18.9311	18.7493
	ENSMUSG00000003848.15	Nob1	0.326511	4.44492	47.7627	4.51712e-07	7.22698e-06	22.4903	23.4519	22.9193	23.7765	24.2869	23.9202	19.4968	16.786	19.0845	18.6519	19.5415
	ENSMUSG00000021400.9	Wrnip1	0.326262	5.45667	36.9881	3.18596e-06	3.56382e-05	45.6272	50.3309	53.3532	56.2233	46.2026	46.5647	40.7407	37.3721	40.0939	41.1012	38.687
	ENSMUSG00000049327.18	Kmt5a	0.326184	5.96065	50.5601	2.85918e-07	5.07751e-06	71.1353	66.7943	72.365	71.1506	71.8547	68.3162	58.4145	57.5991	56.8309	52.0094	55.4029
	ENSMUSG00000054452.11	Tle5	0.325783	8.27957	51.6589	2.40067e-07	4.46801e-06	340.875	335.181	349.501	374.256	353.741	344.962	298.453	262.891	271.878	286.182	275.721
	ENSMUSG00000020346.17	Mgat1	0.325513	7.10833	47.2249	4.94267e-07	7.78638e-06	137.528	147.566	155.401	164.647	151.182	154.748	124.248	119.866	123.756	123.881	113.975
	ENSMUSG00000028975.17	Pex14	0.325403	4.9267	52.1161	2.23397e-07	4.21626e-06	32.9091	32.3892	33.1391	33.0725	35.2807	33.1056	28.1817	27.3783	25.1408	27.3822	24.8494
	ENSMUSG00000051695.7	Pcbp1	0.325126	7.5546	46.3346	5.74616e-07	8.76703e-06	191.85	202.399	222.656	219.798	205.792	195.636	171.268	163.013	166.526	161.985	160.663
	ENSMUSG00000053128.16	Rnf26	0.324603	4.90496	35.442	4.34224e-06	4.60051e-05	31.2564	33.6659	35.6941	32.5362	36.5741	35.976	28.6375	25.4633	28.169	28.406	26.1962
	ENSMUSG00000043284.13	Tmem11	0.323881	4.56073	44.65	7.68301e-07	1.12027e-05	24.7177	24.3255	27.7287	27.5306	24.5743	25.1322	21.9023	19.9577	20.7042	20.1411	19.7264
	ENSMUSG00000029430.14	Ran	0.322697	6.71103	50.2844	2.98865e-07	5.24864e-06	109.218	118.805	121.886	117.72	117.77	106.206	87.8116	92.4577	99.1314	92.9803	88.333
	ENSMUSG00000043323.18	Fbrsl1	0.322603	5.95299	41.655	1.31215e-06	1.71662e-05	62.0817	68.9446	68.758	74.2791	68.3339	66.0836	51.8818	49.8195	54.4131	59.1016	56.7233
	ENSMUSG00000004895.10	Prcc	0.322095	5.28789	39.0539	2.13319e-06	2.55149e-05	40.0944	41.0576	46.7404	44.4244	46.1307	42.8013	35.7273	34.4398	34.7183	34.0276	35.1748
	ENSMUSG00000036686.17	Cc2d1a	0.321765	5.02345	41.4775	1.35553e-06	1.76411e-05	31.6875	35.6147	41.1797	37.7205	34.4184	38.081	28.3337	27.7972	28.4037	29.709	31.5041
	ENSMUSG00000020766.5	Galk1	0.321272	4.53876	39.2704	2.04702e-06	2.45854e-05	24.5022	24.3927	26.4512	27.8882	25.221	25.5149	20.7122	18.2223	20.0235	21.0718	22.5256
	ENSMUSG00000020440.14	Arf5	0.320956	6.01599	44.6324	7.70671e-07	1.12185e-05	64.5248	70.7589	76.498	69.3629	71.1362	71.5055	60.2122	53.4699	54.2488	59.5298	55.1916
	ENSMUSG00000027936.19	Crtc2	0.320646	6.22528	57.4496	9.95881e-08	2.25133e-06	82.3445	76.2691	84.0126	88.8489	83.8545	81.8391	68.1629	60.9204	65.6807	68.167	68.6066
	ENSMUSG00000024392.18	Bag6	0.320176	7.70532	85.5286	2.95981e-09	1.45808e-07	229.501	226.926	244.974	232.401	232.881	233.206	197.652	184.018	187.605	186.203	178.884
	ENSMUSG00000020167.15	Tcf3	0.31987	6.03911	43.3673	9.63317e-07	1.3354e-05	68.2612	74.7908	71.5384	79.2846	75.0164	76.7999	59.1741	55.9833	60.4694	64.7605	56.9874
	ENSMUSG00000001082.13	Mfsd10	0.319819	5.01976	40.2095	1.71463e-06	2.14655e-05	36.0706	33.8003	38.1739	38.3462	34.634	32.8505	30.41	27.6476	28.1925	28.2385	28.1504
	ENSMUSG00000071074.10	Yipf3	0.319518	6.13473	64.3559	3.77999e-08	1.05692e-06	71.5664	78.285	75.7466	79.0165	79.2558	77.5653	64.3141	60.7109	61.9953	60.7769	60.3147
	ENSMUSG00000003072.16	Atp5d	0.319213	6.74627	50.4049	2.93127e-07	5.1638e-06	124.882	121.493	114.672	125.586	121.866	106.716	104.954	88.7774	93.1455	94.302	96.3873
	ENSMUSG00000018736.15	Ndel1	0.318914	6.29408	54.2364	1.60931e-07	3.22955e-06	86.512	80.9057	92.9549	83.4858	87.8065	78.7135	67.3526	67.952	69.8826	65.3375	70.4024
	ENSMUSG00000067924.5	Rtl8b	0.318842	6.73154	37.6211	2.81325e-06	3.19445e-05	110.439	110.338	133.233	115.575	117.554	124.321	97.6613	93.0562	102.371	93.7994	88.4123
	ENSMUSG00000041143.17	Tmco4	0.317853	4.43786	36.4653	3.53433e-06	3.87466e-05	22.9214	23.9223	23.8211	23.9552	24.5743	21.5601	19.6994	18.2821	18.8498	19.4151	17.7722
	ENSMUSG00000028953.11	Abcf2	0.317356	5.82738	50.2392	3.01043e-07	5.28158e-06	63.1595	57.3866	65.0759	68.3797	64.813	57.9189	52.2869	47.9942	52.676	48.7332	50.0422
	ENSMUSG00000024560.8	Cxxc1	0.31731	6.29432	38.3227	2.45468e-06	2.86144e-05	81.7697	85.9455	87.9953	95.1952	87.7346	84.1992	75.1766	61.6684	68.8262	73.528	70.2175
	ENSMUSG00000040699.14	Limd2	0.316528	6.7344	38.6343	2.31165e-06	2.722e-05	111.158	133.925	114.371	125.944	116.189	106.589	96.4965	94.7318	97.676	97.5968	87.2503
	ENSMUSG00000017221.15	Psmd3	0.316341	6.70546	68.5408	2.18121e-08	7.00518e-07	109.146	109.532	122.111	117.005	116.548	109.65	92.3693	87.0719	87.4882	95.2886	95.4102
	ENSMUSG00000030400.18	Ercc2	0.315984	5.05234	34.1898	5.61515e-06	5.68918e-05	33.1246	37.2274	36.0698	40.2233	38.083	39.1016	32.0558	28.3358	30.4695	30.435	28.4409
	ENSMUSG00000026209.16	Dnpep	0.315275	5.3909	42.609	1.10348e-06	1.4906e-05	49.0043	42.2672	50.0468	49.0725	41.8913	44.2684	37.1705	34.2303	37.0422	38.067	38.5021
	ENSMUSG00000032280.17	Tle3	0.314992	6.27976	60.8918	6.08298e-08	1.53296e-06	87.3024	88.3647	88.4461	93.765	90.6807	81.3926	71.9103	65.4086	72.1126	72.4111	72.9639
	ENSMUSG00000025648.19	Pfkfb4	0.314632	5.95047	55.6619	1.29748e-07	2.72612e-06	64.1655	63.9048	69.2089	68.916	64.31	71.9521	53.6036	51.8541	56.9718	55.6021	51.5474
	ENSMUSG00000032577.17	Mapkapk3	0.314531	5.43745	54.5246	1.54024e-07	3.12443e-06	48.7169	49.1213	49.0699	51.2177	43.041	46.3096	39.2468	36.9233	39.8826	38.0112	38.4493
	ENSMUSG00000034390.17	Cmip	0.314266	5.66118	47.933	4.39077e-07	7.04422e-06	53.5311	51.4061	55.307	59.3518	57.6994	53.1348	47.6532	39.7957	43.169	44.7683	45.8698
	ENSMUSG00000027806.10	Tsc22d2	0.313881	5.21336	32.2292	8.49874e-06	7.91294e-05	36.7892	39.2433	36.7461	39.687	43.8314	43.0564	29.625	31.1484	33.0281	34.0649	32.5868
	ENSMUSG00000026502.14	Desi2	0.311653	4.90217	34.7286	5.02359e-06	5.1961e-05	32.1905	33.1283	29.9079	29.944	33.6999	36.8053	24.7888	27.5279	25.7981	27.8662	25.536
	ENSMUSG00000022426.7	Josd1	0.31148	5.40022	39.8696	1.8276e-06	2.24605e-05	48.8606	46.0303	46.0641	47.1954	50.5139	44.9062	39.5253	38.6288	37.5352	37.5086	37.2081
	ENSMUSG00000109324.3	Prmt1	0.311414	5.5287	43.6896	9.09712e-07	1.28353e-05	47.711	47.9118	49.5208	58.7261	52.5977	49.1162	43.602	40.2745	40.845	41.3432	38.8982
	ENSMUSG00000030189.16	Ybx3	0.311339	6.29317	64.4446	3.73516e-08	1.0509e-06	82.1289	86.8191	87.0184	89.5639	87.2317	84.0716	71.3533	70.0165	68.4507	69.6003	67.6032
	ENSMUSG00000037622.15	Wdtc1	0.311137	6.13555	49.5649	3.35739e-07	5.76274e-06	74.1532	77.7475	85.3652	90.3684	78.8247	76.6723	70.1885	61.9377	62.8638	65.4865	63.7741
	ENSMUSG00000025162.19	Csnk1d	0.310664	7.47042	109.225	2.93012e-10	2.70362e-08	193.934	187.615	198.534	200.491	199.756	192.127	159.089	155.862	158.662	156.382	157.705
	ENSMUSG00000017299.14	Dnttip1	0.310513	4.1764	32.1593	8.62771e-06	8.01164e-05	17.676	20.428	19.8384	20.201	19.4008	20.3481	16.3064	15.1104	16.9483	15.6177	15.2107
	ENSMUSG00000020260.10	Pofut2	0.309826	6.37856	50.5857	2.84749e-07	5.06707e-06	87.1587	88.9694	99.1919	98.1449	85.1479	91.4072	75.2526	72.2906	75.9154	75.5756	70.5608
	ENSMUSG00000024896.10	Minpp1	0.309448	5.0065	53.1344	1.90621e-07	3.71008e-06	34.4898	35.2115	40.3531	35.6647	34.7058	32.978	27.9285	29.1736	28.9436	28.6108	28.7842
	ENSMUSG00000002129.12	Sf3a1	0.309266	6.06752	70.9793	1.6018e-08	5.4452e-07	71.9976	75.5299	79.9547	77.7651	72.3577	70.2298	63.1494	59.8133	60.9154	59.5484	57.6475
	ENSMUSG00000038976.13	Ppp1r9b	0.308957	7.59028	38.5838	2.33423e-06	2.73928e-05	188.185	200.853	225.662	224.625	218.726	227.529	177.801	161.098	168.052	180.898	176.825
	ENSMUSG00000029580.15	Actb	0.308074	11.146	42.0949	1.21105e-06	1.60972e-05	2259.73	2394.51	2521.13	2611.21	2438.53	2271.47	1887.92	1908.16	2026.08	1986.52	1948.79
	ENSMUSG00000013701.14	Timm23	0.307854	5.33349	55.1753	1.39585e-07	2.88073e-06	45.3398	41.0576	45.0872	43.9775	45.3403	40.3136	36.968	37.1327	33.8263	33.3575	34.4882
	ENSMUSG00000042558.17	Adprs	0.307676	4.85621	48.0588	4.2999e-07	6.9355e-06	32.4779	30.9108	32.8385	33.9664	32.2628	29.2784	26.4093	25.194	24.7887	24.6272	27.9919
	ENSMUSG00000024050.19	Wiz	0.306978	6.37208	74.7361	1.01107e-08	3.83356e-07	88.4521	87.9615	98.6659	91.7986	89.531	93.0019	74.6449	70.7347	76.6431	73.8258	74.1786
	ENSMUSG00000022035.7	Ccdc25	0.306934	4.93202	33.8263	6.05681e-06	6.03914e-05	29.9631	33.4643	32.9137	31.2848	30.7538	31.3196	26.1308	26.0916	25.5164	22.9147	27.2261
	ENSMUSG00000058239.14	Usf2	0.3066	6.25606	41.9832	1.2359e-06	1.63651e-05	78.2488	76.9411	91.452	89.7427	86.9442	83.3062	71.5558	65.7378	68.122	68.0181	67.7616
	ENSMUSG00000044217.18	Aqp5	0.305482	8.15159	36.75	3.33974e-06	3.69789e-05	297.116	301.381	336.952	289.34	304.305	294.633	248.04	239.941	259.765	245.751	236.241
	ENSMUSG00000063576.13	Klhdc3	0.305313	5.84458	34.8195	4.9307e-06	5.11216e-05	59.7824	60.2761	63.8736	67.4858	62.0825	66.9129	53.1478	49.9391	51.0094	52.4562	49.8837
	ENSMUSG00000001229.10	Dpp9	0.304617	6.40302	37.9597	2.63357e-06	3.02349e-05	85.075	94.8156	99.7179	97.9662	98.0817	94.9793	76.2401	77.7363	79.9765	80.2107	70.7456
	ENSMUSG00000026341.17	Actr3	0.304182	7.80699	37.272	3.01255e-06	3.39411e-05	232.519	270.268	233.777	224.536	246.39	243.923	182.814	190.242	208.122	211.593	186.859
	ENSMUSG00000031826.21	Usp10	0.303976	5.69314	44.349	8.09865e-07	1.16528e-05	59.7824	57.2522	58.2377	54.7931	58.2742	56.1966	47.4	42.9973	47.0187	44.9545	50.227
	ENSMUSG00000039168.16	Dap	0.303581	6.25491	32.0675	8.80024e-06	8.15448e-05	89.0269	81.3761	90.6254	76.7819	79.8306	81.3288	69.0997	68.0417	68.2394	62.1172	69.5309
	ENSMUSG00000039810.12	Zc3h10	0.303264	4.4692	31.5647	9.81443e-06	8.89573e-05	25.3644	23.4519	22.7691	26.0111	23.3528	25.196	19.9273	20.1971	18.5681	21.3138	18.6173
	ENSMUSG00000020476.15	Dbnl	0.302856	6.74125	43.8497	8.84295e-07	1.2558e-05	101.529	115.983	122.487	117.542	114.465	104.866	93.0529	86.3238	95.1408	93.5946	88.9668
	ENSMUSG00000024816.13	Frmd8	0.302142	6.14647	52.3083	2.16769e-07	4.10896e-06	75.0873	81.3089	80.9316	83.3964	78.4654	72.7813	65.2004	62.1771	64.3427	64.686	62.4273
	ENSMUSG00000038279.11	Nop2	0.301145	4.6843	35.0651	4.68879e-06	4.90804e-05	27.6637	27.2822	31.2605	29.7653	27.0174	26.089	23.0417	21.0349	22.3239	22.9705	24.8494
	ENSMUSG00000079426.14	Arpc4	0.300891	6.53011	38.7072	2.27955e-06	2.69223e-05	95.6375	106.575	108.585	85.8098	102.896	100.72	80.7978	78.5442	83.3333	82.0163	81.4935
	ENSMUSG00000038000.11	Acd	0.300858	4.59741	39.6262	1.91348e-06	2.32537e-05	26.0111	26.0726	25.2489	25.8323	27.4485	25.1322	21.9276	19.3294	20.399	22.3749	21.258
	ENSMUSG00000003402.15	Prkcsh	0.298962	6.19137	53.7094	1.74448e-07	3.43362e-06	80.0452	82.9217	84.9143	84.0221	78.0343	77.3102	66.0359	67.0244	67.4413	64.4627	65.0152
	ENSMUSG00000039275.10	Foxk2	0.298467	5.8449	64.4229	3.74608e-08	1.0509e-06	62.944	62.0233	63.6482	68.5584	62.6573	62.384	51.2488	52.9014	51.9248	51.1532	51.653
	ENSMUSG00000036180.16	Gatad2a	0.29819	6.8342	63.8956	4.02221e-08	1.10624e-06	122.152	119.007	119.707	131.754	128.692	121.451	105.46	101.075	94.5539	99.2349	102.989
	ENSMUSG00000013787.16	Ehmt2	0.297766	7.04504	58.8195	8.16408e-08	1.91105e-06	147.66	143.534	151.493	156.245	149.889	132.55	119.715	114.51	119.014	123.639	120.418
	ENSMUSG00000035027.19	Map2k2	0.297561	6.19197	49.4524	3.41941e-07	5.82414e-06	77.3147	75.7987	80.3304	82.6813	78.2498	80.4358	67.0234	59.155	67.0657	67.0687	61.4502
	ENSMUSG00000037373.13	Ctbp1	0.297316	7.40562	50.2058	3.0267e-07	5.29414e-06	176.904	176.662	194.326	202.279	188.834	194.36	154.784	151.314	156.127	161.557	144.634
	ENSMUSG00000018599.6	Mief2	0.297143	4.16702	36.7189	3.36044e-06	3.71844e-05	20.3346	18.2105	18.8615	20.4692	20.5505	20.6033	16.5343	16.9655	15.5399	15.748	15.9501
	ENSMUSG00000024142.16	Mlst8	0.296587	4.77615	31.8263	9.27179e-06	8.50556e-05	30.969	27.4838	29.0813	32.6256	30.682	30.8093	25.0926	25.4334	23.3333	24.4039	24.9287
	ENSMUSG00000070372.12	Capza1	0.296291	7.04341	46.4328	5.65085e-07	8.67475e-06	132.211	158.452	142.25	141.139	149.602	148.497	107.334	119.447	124.812	120.623	119.705
	ENSMUSG00000078652.10	Psme3	0.295386	6.24238	43.4604	9.47486e-07	1.31974e-05	84.4283	83.9296	83.9374	84.1114	83.1359	75.4604	65.9093	65.7677	71.1737	66.0821	67.1014
	ENSMUSG00000025157.9	Zdhhc16	0.295351	4.66203	42.9931	1.02989e-06	1.41028e-05	28.7415	24.8631	29.9079	29.229	28.8856	26.9182	22.3074	23.7577	21.4554	22.9891	23.8724
	ENSMUSG00000029703.11	Lrwd1	0.295294	4.85504	31.7658	9.39427e-06	8.59081e-05	31.6875	35.9506	34.116	35.9328	31.7598	28.9594	26.2827	26.0019	26.6901	28.1826	27.411
	ENSMUSG00000051391.10	Ywhag	0.295033	7.28864	37.8326	2.69953e-06	3.08703e-05	175.826	163.827	171.782	166.972	159.015	155.322	141.567	128.932	132.981	135.85	134.863
	ENSMUSG00000016319.4	Slc25a5	0.2945	7.68682	59.5166	7.38852e-08	1.76747e-06	234.531	229.681	239.338	232.401	219.876	204.438	184.232	183.689	185.352	193.611	177.221
	ENSMUSG00000036057.12	Ptpn23	0.294069	6.35028	59.2302	7.697e-08	1.82949e-06	85.0031	90.9182	90.5502	94.3014	93.483	87.5162	78.3924	69.059	72.7699	73.6583	74.2314
	ENSMUSG00000043336.15	Filip1l	0.293776	6.8815	33.4252	6.58836e-06	6.462e-05	135.66	127.474	117.527	125.318	129.554	123.939	95.0533	111.249	107.089	99.6444	103.332
	ENSMUSG00000047030.16	Spata2	0.293691	5.06859	42.9911	1.03027e-06	1.41028e-05	35.2802	36.6226	36.8212	40.6703	39.0171	34.19	29.9035	28.5153	31.0328	30.5653	31.1344
	ENSMUSG00000026879.15	Gsn	0.293395	12.0256	33.5337	6.43981e-06	6.35203e-05	4566.46	4214.83	4762.49	4834.49	4363.38	4454.39	4019.3	3471.62	3716.45	3774.43	3510.87
	ENSMUSG00000013833.16	Med16	0.292984	5.50467	42.016	1.22854e-06	1.62924e-05	47.9265	48.2478	49.4457	54.4356	50.7295	45.7993	41.9561	36.0256	40.5868	42.8882	39.9809
	ENSMUSG00000015095.13	Fbxw5	0.292905	6.0768	72.7797	1.2819e-08	4.6093e-07	74.5843	73.7828	76.5732	77.3182	75.0164	71.4418	63.7824	59.933	63.3098	60.8328	57.2514
	ENSMUSG00000021486.8	Prelid1	0.292838	6.89379	53.2437	1.87425e-07	3.65773e-06	127.541	132.581	136.915	140.513	125.674	128.021	111.106	107.867	106.033	108.356	104.758
	ENSMUSG00000079562.8	Maea	0.292592	6.58397	50.543	2.86705e-07	5.08114e-06	99.0146	102.543	113.47	113.698	99.447	105.313	86.5962	86.6829	86.2441	87.1167	84.2135
	ENSMUSG00000061689.16	Dlgap4	0.29217	7.0155	48.7468	3.83782e-07	6.36196e-06	138.247	142.593	147.961	127.374	148.883	136.569	125.514	109.962	114.014	113.27	110.093
	ENSMUSG00000029147.12	Ppm1g	0.291978	6.52669	44.1317	8.4139e-07	1.20468e-05	91.8292	93.6061	109.186	107.352	100.812	100.018	84.8238	81.7757	79.6244	82.5934	81.3351
	ENSMUSG00000000916.16	Nsun5	0.291976	4.23251	33.2359	6.85678e-06	6.65157e-05	21.5562	21.436	21.8673	21.0055	20.766	20.0292	17.6737	15.6191	18.0751	17.8887	16.8744
	ENSMUSG00000002763.17	Pex6	0.290945	5.89375	39.8756	1.82554e-06	2.24605e-05	63.5907	64.7111	69.5095	72.1338	67.0405	62.958	57.3004	50.4777	53.5211	56.0116	54.8748
	ENSMUSG00000038762.16	Abcf1	0.290642	6.46067	63.248	4.39193e-08	1.18196e-06	89.5299	93.0013	100.995	99.3069	94.3453	89.6211	81.9372	75.552	77.6291	75.4081	75.499
	ENSMUSG00000023353.15	Agap3	0.290117	6.44749	46.489	5.5972e-07	8.60755e-06	93.913	94.6812	101.672	107.083	99.95	94.4052	83.1779	79.0828	79.5774	83.2635	77.9549
	ENSMUSG00000044533.16	Rps2	0.290075	8.69944	46.5659	5.5246e-07	8.52597e-06	460.942	464.872	461.618	486.97	452.397	392.164	378.466	359.747	369.178	383.016	362.496
	ENSMUSG00000047731.18	Wbp1l	0.289554	6.94374	60.6995	6.24937e-08	1.56136e-06	129.84	134.126	148.262	133.72	138.823	127.447	111.537	106.85	112.465	111.818	111.017
	ENSMUSG00000045216.8	Hs6st1	0.289483	5.74026	62.0814	5.15461e-08	1.3477e-06	55.9741	58.1258	58.9891	62.9272	58.6335	56.8345	50.5651	44.1942	49.8356	47.6908	47.1902
	ENSMUSG00000075284.11	Wipf1	0.289428	6.48229	42.7795	1.07013e-06	1.4523e-05	92.0448	108.188	96.4867	92.7818	103.974	100.465	80.0382	77.3174	82.5586	87.4332	77.6644
	ENSMUSG00000024182.18	Axin1	0.289372	5.98653	46.0978	5.98301e-07	9.07285e-06	68.4767	64.0392	76.1974	73.0277	70.4177	63.0856	58.0093	55.3849	56.0328	56.5886	56.9345
	ENSMUSG00000038697.16	Taf5l	0.289017	5.14396	43.7752	8.96026e-07	1.26768e-05	36.5018	37.9666	40.3531	40.1339	40.6698	38.1448	30.1314	30.9689	31.385	30.9004	36.0198
	ENSMUSG00000029394.12	Cdk2ap1	0.288603	5.8166	31.8784	9.16762e-06	8.4233e-05	60.9321	61.4185	61.9198	65.0724	65.1723	61.6185	51.983	53.2305	55.3286	48.9752	47.0581
	ENSMUSG00000038366.16	Lasp1	0.288194	8.27182	43.6408	9.17618e-07	1.29155e-05	323.702	330.88	385.27	359.328	351.37	348.023	308.48	280.665	292.77	280.393	269.752
	ENSMUSG00000067071.9	Hes6	0.287874	4.86264	33.3997	6.62389e-06	6.48955e-05	32.0468	30.978	33.064	33.2513	32.5502	30.1076	27.0423	25.2838	25.3051	27.8848	25.404
	ENSMUSG00000026171.13	Rnf25	0.28746	4.90389	36.3397	3.62404e-06	3.95154e-05	33.2683	32.9939	33.8906	35.4859	30.2508	30.8093	26.2574	27.7074	25.8685	25.651	28.7577
	ENSMUSG00000019254.17	Ppp1r12c	0.287326	7.00099	60.3123	6.5997e-08	1.63249e-06	138.031	133.589	141.574	143.284	142.847	140.779	115.689	111.069	116.408	116.677	113.737
	ENSMUSG00000044345.10	Marveld1	0.287165	7.84572	32.4788	8.05511e-06	7.58494e-05	253.357	237.61	265.263	276.915	250.055	245.836	212.616	216.124	218.098	204.296	192.933
	ENSMUSG00000020733.4	Slc9a3r1	0.28689	6.22888	35.4732	4.31492e-06	4.58086e-05	89.1706	87.8943	94.1572	85.0053	83.3515	74.376	73.9359	71.9914	69.953	67.8878	67.2335
	ENSMUSG00000033365.15	Ipo13	0.286597	5.82387	33.7997	6.09053e-06	6.06491e-05	60.8602	56.2443	64.4748	66.2344	64.0944	59.7049	52.2869	50.5974	50.3756	50.1107	50.3591
	ENSMUSG00000001248.16	Gramd1a	0.286597	6.36048	58.5441	8.49453e-08	1.97515e-06	85.9372	93.0685	89.8739	92.4243	103.183	90.0676	75.8603	73.7268	76.784	77.0089	75.4462
	ENSMUSG00000070002.8	Ell	0.285931	5.35	70.907	1.61634e-08	5.45637e-07	44.6931	43.208	43.1335	43.9775	41.8913	43.1202	36.7907	34.1705	34.554	35.9636	36.2047
	ENSMUSG00000035969.16	Rusc2	0.285749	7.86841	36.0848	3.81383e-06	4.11823e-05	247.608	243.456	275.032	261.809	256.378	265.674	217.225	218.966	202.3	213.417	207.616
	ENSMUSG00000040731.14	Eif4h	0.285558	8.65321	67.3132	2.5561e-08	7.86168e-07	433.494	449.282	438.248	432.445	452.469	416.34	368.363	338.204	367.394	361.832	356.976
	ENSMUSG00000051675.14	Trim32	0.285503	4.55272	31.1544	1.07365e-05	9.55277e-05	27.8074	24.8631	27.6535	26.9943	25.8677	27.1096	22.434	21.1546	22.0188	22.6913	21.2316
	ENSMUSG00000058440.15	Nrf1	0.284877	5.18376	39.5517	1.94065e-06	2.35347e-05	40.5974	41.0576	41.0294	40.0446	41.8195	35.5933	33.018	30.8492	32.23	32.5199	35.5709
	ENSMUSG00000015750.16	Aph1a	0.284393	7.20419	60.1201	6.78147e-08	1.65551e-06	150.534	159.056	172.534	163.485	155.206	163.295	135.414	128.663	136.878	133.43	125.224
	ENSMUSG00000026269.15	Rnpepl1	0.283824	7.25941	41.4583	1.36031e-06	1.76819e-05	161.312	162.752	176.441	185.474	165.194	164.507	145.897	134.916	143.756	143.482	126.967
	ENSMUSG00000018287.13	Spag7	0.283562	5.46868	47.5597	4.6729e-07	7.42851e-06	48.5732	47.5086	52.7521	49.3406	49.7235	46.5009	42.3106	39.4367	42.4178	37.5272	39.8225
	ENSMUSG00000051853.11	Arf3	0.283122	8.36944	55.5464	1.32012e-07	2.76701e-06	342.455	346.268	370.617	400.267	355.394	348.47	301.719	295.506	302.277	301.037	280.896
	ENSMUSG00000042203.9	Tbc1d22b	0.281881	5.15841	42.5701	1.11123e-06	1.49759e-05	39.6633	38.7057	40.6537	39.1507	41.8195	38.8465	33.9295	29.2633	32.277	34.6792	33.4583
	ENSMUSG00000026201.13	Stk16	0.281875	5.67331	40.1696	1.72748e-06	2.15534e-05	56.7645	54.4971	56.0585	60.2456	60.358	54.0916	48.4129	47.8147	48.2864	45.606	44.2061
	ENSMUSG00000002981.11	Clptm1	0.281785	7.15953	67.6492	2.44699e-08	7.64752e-07	148.306	149.985	165.696	163.396	150.679	149.326	130.907	127.945	127.606	126.17	122.953
	ENSMUSG00000057177.13	Gsk3a	0.281618	6.51475	62.4795	4.87927e-08	1.29968e-06	100.667	95.1516	104.076	100.558	101.603	94.469	83.2792	79.8009	83.1455	82.37	80.2523
	ENSMUSG00000022285.18	Ywhaz	0.280916	8.70565	59.7974	7.09895e-08	1.70699e-06	432.632	464.2	474.017	435.395	440.326	475.598	357.298	390.686	385.07	372.778	361.36
	ENSMUSG00000036398.14	Ppp1r11	0.280914	5.26066	33.8711	6.00036e-06	5.98629e-05	40.8848	41.864	44.6364	42.011	43.8314	37.6983	37.4491	34.1106	33.7793	32.5571	34.1713
	ENSMUSG00000041926.16	Rnpep	0.279753	6.26338	37.9761	2.62518e-06	3.01762e-05	75.6621	86.0799	93.8566	84.2008	77.8905	77.6929	69.6821	65.2291	71.5258	68.7254	64.7512
	ENSMUSG00000025156.18	Gps1	0.27925	6.1165	38.6185	2.31871e-06	2.7248e-05	74.3687	68.071	81.2322	80.7148	77.3157	70.166	63.9343	61.5188	61.3145	60.9072	62.4273
	ENSMUSG00000033272.13	Slc35a4	0.279038	6.47419	62.2642	5.02615e-08	1.32604e-06	93.1944	93.4717	99.7931	104.849	89.1717	96.6377	82.1651	80.2198	80.4929	77.4557	75.8951
	ENSMUSG00000029681.13	Bcl7b	0.27869	5.51079	51.0235	2.65513e-07	4.84846e-06	46.4894	51.0701	48.7694	46.3015	48.1427	48.5421	42.4625	37.6114	39.7887	40.3752	38.5285
	ENSMUSG00000001576.16	Ergic1	0.278591	6.43275	36.382	3.59359e-06	3.92661e-05	90.1766	88.2303	107.232	96.536	88.6688	94.8517	81.76	78.0056	78.8497	74.9241	75.0237
	ENSMUSG00000030733.11	Sh2b1	0.278529	6.21576	49.7547	3.25553e-07	5.63785e-06	75.6621	81.6449	89.7988	89.6533	82.13	81.0098	71.1	63.7031	66.9718	70.4007	71.0625
	ENSMUSG00000040842.18	Szrd1	0.27828	7.04496	65.566	3.21568e-08	9.36197e-07	137.456	133.253	149.013	144.804	148.667	144.606	122.172	113.882	114.014	118.334	120.973
	ENSMUSG00000061374.15	Fiz1	0.277873	5.09529	68.0119	2.33486e-08	7.38978e-07	36.1425	36.4882	37.3473	40.4915	35.64	36.869	32.309	30.0413	30.892	29.9138	29.9989
	ENSMUSG00000022200.9	Golph3	0.277663	6.90795	40.364	1.66579e-06	2.09442e-05	128.618	125.458	129.4	126.838	120.86	144.925	99.7882	106.521	111.127	111.967	104.151
	ENSMUSG00000002833.12	Hdgfl2	0.277583	6.11271	34.2371	5.56032e-06	5.65072e-05	73.722	71.1621	88.2958	76.7819	76.7409	76.5447	64.2382	61.9078	64.7417	65.412	62.0576
	ENSMUSG00000022472.17	Desi1	0.276855	5.54543	49.4516	3.41987e-07	5.82414e-06	51.1599	52.5484	54.781	47.9105	50.5857	48.7973	41.551	44.9722	41.0563	41.4549	41.3805
	ENSMUSG00000011752.8	Pgam1	0.276419	6.74477	32.3719	8.24191e-06	7.71501e-05	125.026	116.722	116.551	125.229	111.447	107.099	104.7	97.8735	95.845	92.5894	91.9245
	ENSMUSG00000078941.10	Ak6	0.276288	5.12691	44.5957	7.75624e-07	1.12683e-05	38.6574	37.093	40.2028	40.5809	37.7237	37.2518	30.4859	32.7941	31.9953	31.0307	32.9301
	ENSMUSG00000032870.9	Smap2	0.276133	6.09205	40.8001	1.53594e-06	1.95513e-05	74.0095	80.0322	77.7755	69.2735	75.1601	69.2092	63.1747	61.7582	61.6431	59.7159	60.3411
	ENSMUSG00000033917.16	Gde1	0.275919	6.86999	38.2124	2.50763e-06	2.90762e-05	129.912	128.011	135.637	132.916	125.171	121.26	105.46	109.573	107.981	101.376	107.531
	ENSMUSG00000078812.11	Eif5a	0.275839	8.0027	54.0295	1.66098e-07	3.29962e-06	276.35	273.292	274.957	279.954	280.305	254.001	229.201	222.198	236.385	226.28	213.874
	ENSMUSG00000003033.16	Ap1m1	0.27567	5.95709	33.9531	5.89863e-06	5.89491e-05	64.381	64.644	71.7639	73.564	67.0405	61.172	56.6927	54.9959	56.6901	55.9185	52.5773
	ENSMUSG00000008036.12	Ap2s1	0.27563	5.55288	33.9968	5.84513e-06	5.8664e-05	45.9146	50.5997	54.5556	55.4188	51.6636	51.9228	41.1712	40.1548	42.7934	44.1726	44.9984
	ENSMUSG00000024958.14	Gpr137	0.275628	5.18568	40.3568	1.66802e-06	2.09572e-05	41.6752	42.6032	40.9542	44.782	40.1668	37.7621	35.4234	32.1956	35.7042	33.6367	33.5639
	ENSMUSG00000004069.18	Dnaja3	0.275138	5.56567	46.6421	5.4536e-07	8.4388e-06	50.657	49.3901	53.4284	50.1451	51.8791	55.2398	46.058	44.1044	41.5023	40.9709	41.4597
	ENSMUSG00000041697.10	Cox6a1	0.274731	6.83928	31.7458	9.43524e-06	8.61923e-05	130.99	122.165	124.591	135.061	123.518	109.778	107.536	102.332	101.901	101.58	100.401
	ENSMUSG00000019370.11	Calm3	0.274623	7.66552	42.5957	1.10612e-06	1.49219e-05	217.43	223.633	226.037	247.686	236.761	223	195.12	182.013	189.366	194.151	186.094
	ENSMUSG00000025730.15	Rab40c	0.274316	4.90481	37.8039	2.71463e-06	3.10022e-05	32.4061	31.0452	31.1853	35.7541	33.0532	32.5953	26.7891	25.4633	28.1925	26.2653	28.256
	ENSMUSG00000001416.14	Cct3	0.273943	6.68234	32.9052	7.35451e-06	7.02769e-05	105.41	108.524	117.903	123.173	106.92	98.4238	92.4199	93.3853	92.0422	89.4249	87.62
	ENSMUSG00000024830.18	Rps6kb2	0.273121	4.91157	32.7318	7.63107e-06	7.23644e-05	29.1727	34.6067	31.5611	36.1116	34.131	33.5521	28.3843	27.7074	26.7605	27.1961	27.2261
	ENSMUSG00000029622.17	Arpc1b	0.273077	7.56757	35.4721	4.31581e-06	4.58086e-05	193.287	213.957	202.367	207.91	201.193	186.259	159.798	156.64	174.483	174.55	165.364
	ENSMUSG00000030298.11	Sec13	0.271412	6.26863	40.6317	1.58472e-06	2.01134e-05	76.1651	78.7554	90.6254	95.374	79.3276	80.7547	69.0491	68.7598	70.8215	69.6003	67.3919
	ENSMUSG00000026966.7	Ssna1	0.270817	4.75793	31.3696	1.02416e-05	9.20637e-05	29.4601	28.0885	32.6131	31.6424	31.0412	29.8524	26.1055	25.7027	25.4225	24.6272	24.2685
	ENSMUSG00000038828.14	Tmem214	0.270748	6.25986	42.2529	1.17683e-06	1.57262e-05	76.2369	76.4035	89.3479	87.6869	89.531	84.0079	70.6696	69.448	68.8967	69.5631	68.8971
	ENSMUSG00000001751.10	Naglu	0.26938	4.99965	32.6566	7.75462e-06	7.33367e-05	32.6935	32.9939	35.0178	35.6647	36.5741	35.2106	27.7766	28.994	29.7652	29.3554	27.9655
	ENSMUSG00000001729.15	Akt1	0.268929	7.73053	47.9898	4.34949e-07	6.99037e-06	219.154	223.096	246.477	241.429	233.169	218.471	202.666	180.487	188.99	194.207	189.157
	ENSMUSG00000020257.14	Wdr82	0.268715	6.34762	51.0547	2.64199e-07	4.82953e-06	87.7335	83.392	87.319	94.3907	93.1237	87.7713	71.6571	73.4874	74.7652	74.1609	74.9973
	ENSMUSG00000024012.19	Mtch1	0.268023	7.65191	36.0558	3.8361e-06	4.13258e-05	213.19	209.656	221.529	246.524	221.169	220.832	191.575	171.57	185.986	188.046	185.037
	ENSMUSG00000030870.13	Ubfd1	0.26781	5.47949	32.7779	7.55648e-06	7.18525e-05	49.148	45.2239	48.8445	49.3406	53.1725	46.6285	39.8292	37.6713	40.6807	42.0506	41.9879
	ENSMUSG00000019428.17	Fkbp8	0.267742	7.66003	52.1567	2.21981e-07	4.19862e-06	218.436	208.85	226.113	229.631	225.839	212.284	190.866	174.353	181.432	185.663	182.027
	ENSMUSG00000051403.10	Ppp1r37	0.267378	6.69873	81.2476	4.74437e-09	2.09993e-07	109.29	114.504	116.626	113.787	118.201	109.076	97.8892	90.7223	91.3614	97.5596	94.2219
	ENSMUSG00000028868.14	Wasf2	0.26715	8.20813	45.0398	7.17891e-07	1.0547e-05	310.049	312.267	299.004	337.965	333.693	316.895	276.601	262.023	265.681	260.513	257.631
	ENSMUSG00000035172.16	Plekhh3	0.266851	4.92375	32.4062	8.18154e-06	7.67912e-05	32.1905	32.9268	34.642	32.6256	32.2628	33.4245	26.5359	26.9893	28.7558	27.6614	27.2261
	ENSMUSG00000036442.9	Thap11	0.266622	5.13867	34.3069	5.48046e-06	5.58911e-05	40.8848	35.9506	38.3993	40.5809	38.8734	37.8259	33.4231	31.9263	31.8075	32.2592	31.5569
	ENSMUSG00000003068.18	Stk11	0.266497	6.98516	39.0144	2.14933e-06	2.56551e-05	137.959	139.099	136.84	148.558	149.817	130.828	125.185	110.56	119.366	117.031	111.783
	ENSMUSG00000024870.7	Rab1b	0.266404	7.41968	50.9306	2.69476e-07	4.9003e-06	175.395	185.801	199.962	198.078	183.733	181.73	162.938	153.139	150.657	156.14	156.227
	ENSMUSG00000005982.15	Naa60	0.26617	6.30738	49.1899	3.56901e-07	5.99369e-06	79.6859	80.8385	92.6543	90.4578	83.2796	86.6231	70.1885	72.8292	71.5258	69.6561	71.5643
	ENSMUSG00000060601.14	Nr1h2	0.265521	6.78643	52.1455	2.22368e-07	4.20139e-06	111.302	114.37	116.926	128.625	122.728	119.027	101.738	96.9161	98.2394	101.599	95.6215
	ENSMUSG00000005069.13	Pex5	0.265262	5.35952	61.7945	5.36347e-08	1.3895e-06	43.5434	47.0382	44.2606	44.9607	44.1907	45.289	38.4872	37.0729	37.277	37.006	36.8913
	ENSMUSG00000017837.13	Nkiras2	0.265132	5.27785	33.9731	5.87411e-06	5.88349e-05	41.6034	37.3618	42.6074	40.1339	39.5201	42.8013	35.4487	34.9484	32.6056	32.2406	34.0392
	ENSMUSG00000030654.10	Arl6ip1	0.264982	7.56252	31.3584	1.02667e-05	9.21941e-05	196.736	224.574	202.592	201.653	205.361	199.846	162.355	169.715	174.859	181.046	165.549
	ENSMUSG00000030435.17	U2af2	0.264956	7.41914	54.9564	1.44271e-07	2.96342e-06	175.826	181.232	193.725	192.983	192.14	190.022	163.115	149.877	157.16	161.185	149.414
	ENSMUSG00000079037.10	Prnp	0.264347	7.69665	34.8795	4.87036e-06	5.06452e-05	225.549	225.246	223.708	206.837	209.816	208.84	177.472	183.449	193.404	182.517	165.126
	ENSMUSG00000036513.16	Commd2	0.263945	4.77977	37.4175	2.92766e-06	3.30884e-05	26.0829	29.7013	29.8327	29.944	30.5383	31.5109	24.409	24.4759	24.1784	24.7575	25.4568
	ENSMUSG00000070808.5	Bicra	0.263471	5.77312	38.0728	2.57637e-06	2.97032e-05	54.0341	58.2602	58.4631	64.8936	63.5196	60.1514	51.8564	46.7375	49.6009	52.2886	48.7746
	ENSMUSG00000020133.9	2310011J03Rik	0.26327	5.36156	40.4412	1.64195e-06	2.07342e-05	42.9686	44.6863	46.4399	48.3574	42.7536	44.2684	36.7401	35.3673	38.0516	39.1839	37.5778
	ENSMUSG00000048832.10	Vps37c	0.263155	5.38958	46.8597	5.25647e-07	8.18461e-06	42.8249	41.3936	42.4572	45.0501	45.0529	47.075	37.8542	35.7563	37.1361	36.8198	35.6237
	ENSMUSG00000022010.20	Tsc22d1	0.262447	8.09378	33.1042	7.05044e-06	6.80801e-05	297.331	304.539	283.448	263.239	287.922	291.572	237.355	239.822	242.676	251.838	228.926
	ENSMUSG00000066724.5	Gm10175	0.262096	5.99914	35.253	4.5124e-06	4.75478e-05	70.776	73.1108	74.4691	72.4914	69.5554	60.5341	60.0856	58.5865	58.8262	55.3415	59.5753
	ENSMUSG00000028959.15	Fastk	0.260821	5.94183	58.1248	9.02572e-08	2.06884e-06	68.4767	62.5608	66.654	67.3964	68.765	64.9355	59.0222	54.0085	55.3755	55.4531	53.4223
	ENSMUSG00000003099.12	Ppp5c	0.259965	6.0654	35.0207	4.73152e-06	4.94386e-05	69.9856	71.5653	75.2957	81.0724	75.5912	65.5733	65.2004	57.7188	60.3521	58.9527	63.1139
	ENSMUSG00000005575.17	Ube2m	0.259573	5.76125	54.0537	1.65485e-07	3.2944e-06	58.5609	57.5882	61.8447	56.9384	59.4239	56.8983	52.1096	48.8021	48.1925	47.393	48.0352
	ENSMUSG00000006299.14	Aamp	0.258494	6.91587	35.1346	4.62265e-06	4.85044e-05	119.493	121.963	135.637	144.089	130.704	135.931	112.17	103.768	108.216	116.36	108.086
	ENSMUSG00000039515.12	Ptpa	0.25777	6.98903	64.7943	3.56398e-08	1.01556e-06	133.289	132.379	144.429	143.553	140.117	139.822	118.728	113.014	115.07	114.648	119.467
	ENSMUSG00000023286.17	Ube2j2	0.25723	5.1016	40.1588	1.731e-06	2.15774e-05	37.4359	37.765	36.671	34.4133	35.9274	35.5933	31.2962	28.3358	30.7042	29.951	31.6098
	ENSMUSG00000030120.15	Mlf2	0.256724	7.4419	50.8757	2.71844e-07	4.93307e-06	181.575	187.682	199.887	193.072	188.331	184.728	165.774	158.495	159.624	160.068	147.803
	ENSMUSG00000033021.17	Gmppa	0.256696	5.21174	37.9372	2.64512e-06	3.03372e-05	39.2322	39.0417	41.4051	41.296	41.7476	39.3568	35.6007	30.7594	33.3333	35.1445	33.8808
	ENSMUSG00000033819.17	Ppp1r16a	0.25602	6.24139	46.4654	5.61964e-07	8.63443e-06	80.117	88.0287	87.1687	89.6533	81.124	82.158	70.5683	68.7299	73.7089	72.4111	69.1084
	ENSMUSG00000078676.10	Casc3	0.255758	6.50749	46.3918	5.6904e-07	8.72761e-06	99.5894	99.5194	98.5156	100.648	103.83	94.5328	82.5956	80.0104	83.9201	84.9388	84.8737
	ENSMUSG00000028917.15	Plekhm2	0.255137	5.90035	36.1866	3.73677e-06	4.05007e-05	64.7403	56.7818	64.9256	61.9439	61.0047	64.17	55.2494	49.6399	48.0516	53.7964	54.0561
	ENSMUSG00000027540.14	Ptpn1	0.254817	6.91103	58.2236	8.89746e-08	2.047e-06	123.086	128.078	132.556	131.486	121.363	121.642	106.599	102.063	108.826	107.984	103.94
	ENSMUSG00000028433.15	Ubap2	0.25449	6.08422	38.2731	2.47832e-06	2.8813e-05	73.5065	74.7236	74.3939	72.9383	80.5492	69.8471	65.175	65.4086	59.8591	60.0324	61.1069
	ENSMUSG00000037536.15	Fbxo34	0.254405	4.68501	35.4078	4.37251e-06	4.62415e-05	26.0111	29.7685	25.85	27.7094	26.8018	26.4079	24.2571	21.3042	22.6291	22.3004	23.0537
	ENSMUSG00000056201.9	Cfl1	0.253933	9.01126	39.7359	1.87427e-06	2.28939e-05	530.138	563.988	578.319	558.21	545.09	553.865	467.569	469.5	464.976	481.394	443.382
	ENSMUSG00000039703.17	Nploc4	0.253653	6.20517	61.1863	5.83733e-08	1.48392e-06	74.728	75.8659	81.157	82.5919	79.1121	80.5633	67.2007	66.3063	65.5399	65.2259	66.9958
	ENSMUSG00000078619.11	Smarcd2	0.253463	6.75262	39.4919	1.96274e-06	2.37531e-05	113.242	124.315	120.608	122.1	115.758	111.628	98.1424	94.7916	102.136	98.0249	101.51
	ENSMUSG00000024422.15	Dhx16	0.252889	6.00653	56.7165	1.10919e-07	2.4516e-06	69.1953	72.5733	74.8448	74.1897	73.0763	70.2298	61.7821	57.5392	61.6666	62.1172	60.3675
	ENSMUSG00000004789.11	Dlst	0.252101	7.0073	37.3559	2.96329e-06	3.34261e-05	151.612	133.387	140.522	143.463	137.961	127.256	124.349	116.844	111.408	115.244	115.77
	ENSMUSG00000018565.18	Elp5	0.25097	4.78455	34.1709	5.6372e-06	5.70227e-05	30.6097	28.8277	31.4108	28.782	29.8916	27.1096	24.7888	25.9121	25.1643	23.6406	24.1893
	ENSMUSG00000038346.19	Zfp384	0.250651	6.28211	48.4807	4.00984e-07	6.58452e-06	79.7578	87.6255	84.764	82.5025	81.9144	83.1786	75.4552	71.0937	68.7793	67.0129	67.7616
	ENSMUSG00000018040.10	Rrp7a	0.250621	5.74252	37.6927	2.77414e-06	3.15785e-05	53.4593	57.9914	61.8447	56.9384	58.4179	58.7481	49.4004	50.1486	50.2817	46.4995	47.0581
	ENSMUSG00000015143.16	Actn1	0.249622	7.47272	35.3345	4.43817e-06	4.68222e-05	200.688	187.75	198.76	196.111	191.852	190.533	170.306	163.252	169.46	157.871	156.147
	ENSMUSG00000024121.14	Atp6v0c	0.249522	7.82225	38.1537	2.53628e-06	2.93303e-05	229.86	230.689	237.76	263.597	238.63	229.443	207.78	182.971	200.657	209.006	201.727
	ENSMUSG00000052253.7	Zfp622	0.24945	4.90912	35.4272	4.35539e-06	4.60884e-05	30.466	33.3971	32.1622	33.877	32.6221	29.8524	25.6244	27.7672	26.3145	27.6614	27.411
	ENSMUSG00000002372.10	Ranbp3	0.248672	6.14219	49.3135	3.49771e-07	5.91625e-06	73.2909	76.2691	78.9778	78.8377	71.0643	75.3966	64.5167	62.207	61.5493	65.8215	64.1174
	ENSMUSG00000067274.11	Rplp0	0.248552	9.40606	32.9557	7.27601e-06	6.97845e-05	750.082	778.886	733.87	804.198	726.667	638.766	634.482	603.997	629.6	616.072	624.827
	ENSMUSG00000026426.11	Arl8a	0.247981	6.32425	34.4712	5.29727e-06	5.44269e-05	80.5482	87.9615	89.8739	79.9103	86.3694	78.9687	76.4427	71.5425	71.1737	69.5072	64.7776
	ENSMUSG00000003534.18	Ddr1	0.247813	6.62605	38.9712	2.16714e-06	2.5797e-05	107.637	105.03	107.007	109.318	101.171	101.549	89.3561	84.7679	83.7793	88.4942	96.8627
	ENSMUSG00000025366.9	Esyt1	0.247754	7.44459	44.801	7.48323e-07	1.09388e-05	183.658	201.66	197.257	194.323	178.272	171.014	156.177	155.323	162.206	160.98	155.593
	ENSMUSG00000002524.18	Puf60	0.247065	6.96105	47.3655	4.82738e-07	7.61163e-06	129.84	132.177	147.435	144	131.638	128.85	119.817	115.707	112.582	111.725	111.572
	ENSMUSG00000005813.13	Metap1	0.24668	5.07017	38.9857	2.16117e-06	2.57612e-05	37.0047	35.1443	35.5438	37.1842	36.4304	33.1694	29.6503	32.3452	29.3897	29.0203	30.2102
	ENSMUSG00000043998.11	Mgat2	0.246374	5.7256	38.5056	2.36962e-06	2.77527e-05	54.6089	54.6315	57.4862	58.1897	55.4719	59.4497	47.1215	47.9344	49.6713	48.4354	45.5265
	ENSMUSG00000027404.17	Snrpb	0.246359	7.02135	44.3568	8.08749e-07	1.16506e-05	131.277	137.016	151.719	140.603	138.608	134.591	116.88	117.173	116.385	119.897	115.348
	ENSMUSG00000000738.19	Spg7	0.246323	5.60446	31.4132	1.01445e-05	9.13793e-05	50.0821	55.7739	58.5383	55.4188	51.3043	50.0092	45.501	46.3486	43.0047	45.5874	45.0776
	ENSMUSG00000008604.12	Ubqln4	0.245257	6.17612	34.1118	5.70684e-06	5.75916e-05	84.8594	76.6723	83.186	77.05	78.8247	75.4604	70.7709	64.8999	67.3004	64.4254	67.2863
	ENSMUSG00000048920.9	Fkrp	0.244808	5.34879	39.023	2.1458e-06	2.56306e-05	42.8967	44.6191	43.8098	42.6367	46.49	41.2704	38.4366	36.7736	37.4882	35.9077	35.4653
	ENSMUSG00000004788.12	Eif2b2	0.244687	5.03522	31.4888	9.97837e-06	9.00688e-05	34.921	37.4962	36.5958	37.363	31.8317	32.978	29.8023	29.3232	29.8357	29.5601	29.9197
	ENSMUSG00000024851.15	Pitpnm1	0.244261	6.17373	38.1816	2.5226e-06	2.9211e-05	74.5124	77.2771	77.9258	83.307	76.4534	73.0364	66.7196	65.0496	63.9671	68.4834	60.9749
	ENSMUSG00000029447.14	Cct6a	0.244222	6.46377	35.0041	4.74767e-06	4.95776e-05	93.4819	97.1003	93.6312	100.558	95.5668	89.6849	78.7975	82.9427	81.4319	81.2345	76.5289
	ENSMUSG00000026972.16	Arrdc1	0.243575	6.34443	37.5389	2.85885e-06	3.23948e-05	89.7455	86.6847	91.6022	90.3684	86.2975	85.2198	72.8472	75.552	75.9154	77.7163	70.8513
	ENSMUSG00000024319.19	Vps52	0.24343	5.88729	46.3375	5.7433e-07	8.76703e-06	61.6506	63.5688	62.8216	65.2512	64.5974	64.4252	56.1609	51.7644	55.1878	55.2298	50.7024
	ENSMUSG00000028854.10	Slc9a1	0.242622	6.28933	33.5512	6.41617e-06	6.33229e-05	80.3326	78.7554	88.6716	87.3293	85.3634	81.7115	74.6702	65.3188	71.5258	69.6748	72.3565
	ENSMUSG00000007041.10	Clic1	0.242306	7.24621	34.7645	4.98667e-06	5.16098e-05	156.857	166.717	174.638	164.201	158.655	148.305	139.567	136.891	137.958	136.297	132.117
	ENSMUSG00000026430.17	Rassf5	0.24218	5.67683	33.7842	6.1103e-06	6.07511e-05	53.8185	61.4857	55.307	53.4523	55.903	55.1122	46.9189	45.6005	49.3896	48.3609	45.8434
	ENSMUSG00000033159.15	Cnppd1	0.238778	6.41022	36.8728	3.25945e-06	3.63205e-05	85.7216	96.3611	90.8508	94.212	93.8423	82.8597	77.3036	76.2103	78.5445	78.0886	73.8089
	ENSMUSG00000006498.17	Ptbp1	0.238678	7.99517	37.7029	2.76863e-06	3.15364e-05	267.943	273.225	295.998	281.027	282.892	282.705	245.001	237.189	237.723	244.094	225.15
	ENSMUSG00000004937.7	Sgta	0.23834	6.27254	39.7386	1.87329e-06	2.28939e-05	81.123	78.4194	85.3652	87.4187	86.2975	78.3946	70.0619	67.0543	69.6009	73.0254	71.1682
	ENSMUSG00000041740.17	Rnf10	0.237984	7.76506	43.1763	9.96687e-07	1.37401e-05	226.34	226.657	250.91	235.53	244.522	228.486	205.02	206.22	199.343	196.087	191.349
	ENSMUSG00000007036.16	Abhd16a	0.237471	6.14293	31.256	1.04997e-05	9.39e-05	73.9376	68.2726	81.2322	78.0333	74.6571	74.6311	69.4036	59.6337	62.0422	64.0159	63.378
	ENSMUSG00000025736.16	Jmjd8	0.235516	5.77436	31.5796	9.7827e-06	8.87158e-05	57.9861	57.2522	67.0297	57.0277	59.0646	61.2358	50.1853	51.6148	53.3098	50.5389	48.9067
	ENSMUSG00000019590.17	Cyb561	0.235123	6.98995	31.1625	1.07174e-05	9.54058e-05	142.63	136.747	140.747	140.245	138.392	123.939	115.208	118.101	118.685	115.597	114.793
	ENSMUSG00000052310.10	Slc39a1	0.233977	6.93204	32.9196	7.33209e-06	7.02166e-05	116.188	119.343	131.429	135.24	127.327	135.101	109.764	108.286	106.948	104.335	112.417
	ENSMUSG00000020743.16	Mif4gd	0.233871	5.42678	48.6849	3.87712e-07	6.40332e-06	49.3636	45.4255	44.0352	47.0166	44.9092	47.7129	39.7026	38.3296	38.2394	40.5986	40.4299
	ENSMUSG00000040712.17	Camta2	0.23293	6.40122	36.8002	3.30663e-06	3.66821e-05	87.8773	91.9261	95.2092	91.1729	89.7466	93.1294	80.1395	75.7316	76.8544	78.2189	78.3774
	ENSMUSG00000031916.18	Cog8	0.232773	5.46148	44.3548	8.09041e-07	1.16506e-05	44.9087	47.979	50.7983	48.0892	43.9751	47.075	40.0318	38.928	42.277	38.7558	40.5355
	ENSMUSG00000000278.11	Scpep1	0.232556	5.97374	40.6175	1.5889e-06	2.01519e-05	66.0337	70.9605	63.047	64.3573	68.8368	65.7647	58.2119	53.5597	55.6103	55.8441	59.8394
	ENSMUSG00000014959.13	Gorasp2	0.232477	6.83855	56.0475	1.22489e-07	2.61775e-06	123.589	116.117	129.926	120.134	122.009	120.686	105.561	99.22	106.408	103.833	104.468
	ENSMUSG00000036275.14	9530068E07Rik	0.232215	7.7204	36.8204	3.29343e-06	3.66021e-05	214.556	208.648	229.87	221.318	213.912	236.906	178.611	190.99	190.681	190.037	189.843
	ENSMUSG00000024969.16	Mark2	0.232081	6.90611	47.4566	4.75418e-07	7.52532e-06	130.415	129.825	127.822	130.055	134.512	126.937	115.056	107.957	111.854	111.93	106.264
	ENSMUSG00000115987.2	Vps28	0.231304	6.33568	34.2801	5.51088e-06	5.61357e-05	88.3084	85.8783	92.7294	90.1003	85.9383	79.0324	78.8481	71.9914	72.0892	77.1393	70.2967
	ENSMUSG00000004264.18	Phb2	0.231058	6.07992	49.802	3.23069e-07	5.60039e-06	72.8598	67.6678	76.4229	72.8489	72.4296	72.2072	62.8962	62.1472	61.1032	61.7821	60.4731
	ENSMUSG00000004056.16	Akt2	0.230932	7.29699	33.2325	6.86173e-06	6.65157e-05	166.701	165.104	173.661	172.871	172.595	169.483	159.241	131.685	143.967	146.237	143.34
	ENSMUSG00000004455.17	Ppp1cc	0.230824	7.22909	33.4938	6.49404e-06	6.39467e-05	163.539	160.266	154.875	153.027	163.254	161.509	127.337	127.406	142.206	146.888	135.338
	ENSMUSG00000003458.13	Ncstn	0.22904	7.17197	49.5276	3.37783e-07	5.78645e-06	149.6	147.364	156.378	154.726	149.314	147.668	130.249	131.356	125.892	127.66	128.288
	ENSMUSG00000014349.8	Ube2z	0.227879	6.9079	64.73	3.59481e-08	1.02267e-06	130.199	123.576	129.25	131.486	125.818	126.618	109.764	113.373	106.972	105.787	109.829
	ENSMUSG00000034681.18	Rnps1	0.227489	6.25727	41.1599	1.43707e-06	1.84544e-05	81.7697	83.2576	82.9605	81.4299	77.3876	77.7567	68.6693	68.2512	70.7981	67.4596	69.6893
	ENSMUSG00000007564.16	Ppp2r1a	0.22677	7.68999	41.9132	1.25175e-06	1.65482e-05	223.106	214.83	234.905	227.843	214.63	203.928	192.664	182.971	189.436	182.349	191.93
	ENSMUSG00000004530.13	Coro1c	0.226092	7.44135	38.3927	2.42174e-06	2.82683e-05	177.766	183.919	199.812	185.653	190.271	187.088	161.292	162.983	158.122	157.033	161.746
	ENSMUSG00000038612.17	Mcl1	0.224791	8.53796	32.5773	7.88709e-06	7.43878e-05	391.603	397.742	356.941	370.591	403.464	395.354	309.543	325.278	349.413	342.082	325.05
	ENSMUSG00000001366.15	Fbxo9	0.224512	5.52071	31.244	1.05275e-05	9.40051e-05	51.1599	46.5006	51.8503	51.1283	51.0169	49.6903	44.6401	43.895	42.277	41.6783	42.4104
	ENSMUSG00000040385.8	Ppp1ca	0.224113	7.7413	46.9097	5.21222e-07	8.13022e-06	231.872	230.084	239.188	233.117	230.941	223.192	203.704	197.842	202.324	199.159	187.44
	ENSMUSG00000009090.18	Ap1b1	0.223775	6.40299	35.5975	4.20751e-06	4.47407e-05	90.8951	89.9102	100.469	91.888	92.2615	85.5387	77.7593	78.5143	80.2112	79.5778	77.0042
	ENSMUSG00000034341.18	Wbp2	0.223417	7.47438	35.5551	4.2438e-06	4.50991e-05	195.442	192.185	198.008	184.491	189.122	179.242	178.712	160.799	162.652	160.328	150.127
	ENSMUSG00000022552.17	Sharpin	0.223282	5.60349	36.1185	3.78817e-06	4.09814e-05	50.8725	50.4653	52.2261	54.7037	51.8791	51.0936	46.6151	43.9548	45.1643	44.7311	41.5918
	ENSMUSG00000071646.10	Mta2	0.222723	6.86719	59.8311	7.06511e-08	1.70177e-06	127.469	125.794	129.476	120.402	125.602	126.107	109.638	109.842	105.047	106.699	107.901
	ENSMUSG00000023118.16	Sympk	0.22242	6.7938	36.0509	3.83994e-06	4.13363e-05	117.194	116.856	123.314	128.715	123.59	117.56	108.119	101.225	103.122	104.317	102.514
	ENSMUSG00000003299.11	Mrpl4	0.220897	5.79861	44.4354	7.97683e-07	1.15156e-05	59.7105	60.4105	58.914	64.6255	62.2262	60.279	54.667	52.2132	52.1831	52.8471	49.8045
	ENSMUSG00000025575.15	Cant1	0.220185	6.49913	36.167	3.7515e-06	4.06098e-05	90.464	99.9226	95.4347	99.2175	96.7165	91.152	78.3164	80.13	80.845	86.0929	84.3455
	ENSMUSG00000034757.16	Tmub2	0.220093	5.66123	32.4721	8.06666e-06	7.59089e-05	48.7888	53.3548	55.7579	56.2233	51.7354	57.5361	47.3494	44.9422	46.1033	45.7735	47.1638
	ENSMUSG00000048277.16	Syngr2	0.220082	7.02248	44.8994	7.35615e-07	1.07802e-05	134.295	137.083	144.354	143.553	132.572	130.19	118.703	111.817	114.695	121.982	120.761
	ENSMUSG00000004849.15	Ap1s1	0.219799	5.49135	33.235	6.858e-06	6.65157e-05	48.1421	49.6589	47.6422	43.62	46.2745	47.0112	40.7407	40.8729	40.1878	39.9843	40.377
	ENSMUSG00000010067.14	Rassf1	0.217813	5.94407	31.2323	1.05545e-05	9.41964e-05	63.8062	62.2248	66.3534	63.1953	63.3759	63.0218	55.3507	57.3597	55.0939	53.0891	52.8414
	ENSMUSG00000053293.10	Pom121	0.216875	5.94669	33.7647	6.13536e-06	6.08615e-05	69.1234	65.7191	64.7002	70.7037	66.6093	62.7029	58.7183	57.3597	56.8779	57.6311	55.7726
	ENSMUSG00000030082.15	Sec61a1	0.215886	7.6142	32.7085	7.66904e-06	7.2685e-05	190.269	194.469	223.407	219.172	203.277	209.414	173.294	173.366	182.488	178.18	182.264
	ENSMUSG00000020454.18	Eif4enif1	0.215175	6.12195	38.7517	2.26017e-06	2.67283e-05	76.5962	71.4309	74.0182	74.6366	72.3577	71.1228	62.4404	62.1771	61.8075	63.2899	66.2036
	ENSMUSG00000059248.14	Septin9	0.21509	7.0888	32.8811	7.39225e-06	7.05988e-05	139.899	149.649	159.759	153.564	146.153	144.988	131.717	125.88	127.465	128.199	128.472
	ENSMUSG00000056076.14	Eif3b	0.215066	7.23013	32.5982	7.85188e-06	7.40957e-05	152.115	152.673	172.008	169.206	159.374	156.087	137.541	135.694	138.591	136.334	141.967
	ENSMUSG00000013160.8	Atp6v0d1	0.214758	6.59799	32.8065	7.51055e-06	7.14938e-05	99.8768	100.662	106.18	96.536	108.788	101.741	86.7735	89.0467	89.061	87.6193	88.3066
	ENSMUSG00000026927.18	Entr1	0.213212	6.4171	35.916	3.94554e-06	4.22643e-05	91.6855	88.4318	95.3595	96.8041	90.1777	92.7467	79.7597	82.1946	80.5164	79.0566	77.506
	ENSMUSG00000031586.18	Rbpms	0.212697	7.03381	33.1236	7.02157e-06	6.79141e-05	141.121	130.833	130.903	133.988	139.829	140.204	121.007	117.023	116.361	115.43	117.645
	ENSMUSG00000045594.11	Glb1	0.211527	4.79051	32.7007	7.68191e-06	7.27674e-05	29.3164	30.5748	29.6824	31.4636	30.1071	29.4697	26.3587	26.2412	25.2582	25.3532	26.7508
	ENSMUSG00000028923.15	Necap2	0.209352	6.31121	40.114	1.74557e-06	2.16971e-05	82.2727	79.0914	87.9201	82.3237	84.2138	83.1148	70.0113	71.8118	73.2394	75.1661	69.3196
	ENSMUSG00000049755.15	Zfp672	0.208812	4.85105	31.2463	1.05221e-05	9.40051e-05	33.2683	31.5156	29.1564	31.7317	32.0472	31.3833	26.7385	26.6901	29.3662	26.0233	27.543
	ENSMUSG00000024826.16	Dpf2	0.208478	6.63762	40.7265	1.55705e-06	1.97859e-05	111.661	104.425	109.186	105.028	106.992	98.1686	94.5469	95.2704	90.6807	87.8055	89.9967
	ENSMUSG00000030822.16	Prr14	0.207586	6.43223	39.68	1.89413e-06	2.30991e-05	91.6855	91.2541	95.3595	88.2232	90.6807	95.2982	79.2786	83.2419	78.2159	79.0938	78.9848
	ENSMUSG00000006998.17	Psmd2	0.205925	7.29979	32.9156	7.33821e-06	7.02366e-05	159.084	167.523	175.69	180.29	164.763	159.532	147.948	149.249	146.009	139.592	144.555
	ENSMUSG00000026176.14	Ctdsp1	0.205743	7.76196	32.2711	8.4225e-06	7.85455e-05	225.046	227.06	224.76	233.653	237.336	230.719	209.578	196.465	204.225	194.803	191.032
	ENSMUSG00000001419.18	Mef2d	0.204239	7.36358	37.0001	3.17838e-06	3.55763e-05	175.898	170.413	167.649	177.608	177.194	168.143	153.113	145.928	153.756	148.75	148.41
	ENSMUSG00000027255.15	Arfgap2	0.201451	6.36023	50.4958	2.88883e-07	5.10482e-06	89.3143	84.8704	87.0935	89.4746	86.8005	87.4524	79.3799	72.53	76.2676	75.9479	76.2912
	ENSMUSG00000025373.15	Rnf41	0.20136	5.27966	34.455	5.31504e-06	5.4523e-05	42.8249	41.3936	40.2028	41.296	40.2387	38.7189	34.9423	34.1106	37.1126	36.4289	34.6466
	ENSMUSG00000024835.16	Coro1b	0.199603	7.38043	32.6201	7.81528e-06	7.37903e-05	163.539	180.627	182.528	181.541	173.026	170.184	153.24	150.386	149.883	158.225	151.156
	ENSMUSG00000032042.12	Srpr	0.197991	7.45238	36.402	3.57922e-06	3.91827e-05	183.802	180.896	190.494	193.161	181.361	182.113	160.076	168.997	163.521	154.39	160.69
	ENSMUSG00000034908.17	Sidt2	0.194743	7.07386	31.5359	9.87623e-06	8.93781e-05	140.043	138.964	135.111	153.206	142.488	144.478	128.552	121.093	120.54	123.583	128.156
	ENSMUSG00000009291.14	Pttg1ip	0.19162	8.05618	35.0237	4.72867e-06	4.94386e-05	276.925	278.601	282.321	281.116	284.688	276.518	250.623	241.497	251.807	246.998	235.027
	ENSMUSG00000015023.8	Ddx19a	0.189944	5.48075	32.3308	8.31504e-06	7.77512e-05	47.7828	46.7694	48.0179	49.1618	46.9211	45.4165	42.7157	41.202	42.4882	39.9843	41.0636
	ENSMUSG00000031065.15	Cdk16	0.189939	7.04558	33.5052	6.47854e-06	6.38309e-05	134.654	132.984	143.377	141.229	145.721	147.221	125.767	122.439	120.892	124.979	123.349
	ENSMUSG00000028911.17	Srsf4	0.182308	6.52742	31.4473	1.00691e-05	9.07467e-05	95.7093	94.4796	97.9896	95.8209	94.6327	97.7859	84.1401	81.6261	84.8591	82.5561	90.1551
	ENSMUSG00000004897.17	Hdgf	0.173063	7.39741	33.7981	6.0926e-06	6.06491e-05	178.054	176.192	180.349	174.659	171.517	170.759	160.659	157.029	156.479	150.369	152.688
	ENSMUSG00000023452.20	Pisd	0.168649	6.25591	31.0534	1.09776e-05	9.74243e-05	80.1889	81.4433	78.4518	82.7707	79.3276	81.5201	68.4667	70.3457	71.8544	73.2488	74.654
	ENSMUSG00000043962.17	Thrap3	-0.173709	7.69109	31.0487	1.0989e-05	9.74755e-05	202.7	196.418	186.661	190.569	201.05	191.107	216.465	227.793	217.183	212.245	224.754
	ENSMUSG00000034290.10	Nek9	-0.185394	7.40014	42.5945	1.10637e-06	1.49219e-05	161.599	157.78	160.06	161.966	158.583	158.575	179.117	185.604	178.709	179.259	185.645
	ENSMUSG00000041415.12	Dicer1	-0.18552	6.10255	32.2908	8.38689e-06	7.83391e-05	65.9618	62.4936	60.492	61.1395	67.0405	64.0424	70.0113	75.2528	69.2018	72.3925	74.4955
	ENSMUSG00000074582.11	Arfgef2	-0.190457	6.21065	36.0613	3.8319e-06	4.13258e-05	70.4886	67.5334	68.232	68.469	68.5494	69.5919	75.5565	81.0277	76.9718	77.3254	81.784
	ENSMUSG00000028284.14	Map3k7	-0.194665	6.07781	31.9198	9.08586e-06	8.37022e-05	64.4529	62.4936	59.2897	60.2456	64.0226	68.1248	69.5049	70.8244	72.8638	72.7834	75.2877
	ENSMUSG00000036561.10	Ppp6r2	-0.199797	5.60896	31.7499	9.4268e-06	8.61603e-05	48.7888	44.9551	43.3589	45.4971	47.0649	45.5441	53.8821	53.8589	52.3474	51.7116	51.653
	ENSMUSG00000021482.11	Prxl2c	-0.20017	6.72534	31.9988	8.93179e-06	8.25008e-05	104.188	104.962	96.7873	95.8209	100.597	100.656	118.753	122.11	109.46	110.013	117.17
	ENSMUSG00000004568.14	Arhgef18	-0.200629	6.99097	30.9968	1.11154e-05	9.82971e-05	120.93	115.176	117.001	118.972	117.626	123.747	135.262	140.183	136.268	136.111	135.47
	ENSMUSG00000027288.17	Zfp106	-0.201332	7.2116	34.1973	5.60643e-06	5.68764e-05	142.271	139.771	133.759	137.296	142.919	142.054	161.545	162.444	153.85	157.369	167.872
	ENSMUSG00000026615.15	Eprs	-0.20401	6.35402	36.4644	3.53494e-06	3.87466e-05	76.0214	78.7554	77.7003	77.3182	73.8667	78.7773	91.8882	89.4955	89.6243	86.0371	86.907
	ENSMUSG00000060733.14	Ipmk	-0.214008	5.60876	34.7092	5.04372e-06	5.21384e-05	43.9027	46.7022	44.2606	41.8323	46.5619	47.9042	49.2991	54.4872	51.5493	54.057	52.9206
	ENSMUSG00000026663.7	Atf6	-0.214169	6.52841	38.7057	2.28019e-06	2.69223e-05	88.8114	85.8783	85.3652	81.1617	87.3035	84.9009	94.2936	102.212	97.9577	97.5782	104.415
	ENSMUSG00000031691.15	Tnpo2	-0.215043	6.28916	38.1018	2.5619e-06	2.95678e-05	75.8777	71.1621	69.9604	68.2903	74.0104	78.5859	86.7735	85.2766	84.014	81.1973	86.5373
	ENSMUSG00000066406.17	Akap13	-0.2151	7.92911	40.724	1.55778e-06	1.97859e-05	231.369	224.574	212.286	221.586	232.953	217.323	260.472	272.197	251.361	258.167	254.146
	ENSMUSG00000006920.15	Ezh1	-0.215285	6.67268	31.6434	9.64767e-06	8.76737e-05	96.356	90.2462	93.1803	99.1282	103.112	89.6849	115.664	108.406	107.77	109.101	112.021
	ENSMUSG00000035629.20	Rubcn	-0.215748	6.11408	31.0375	1.10162e-05	9.76176e-05	62.2254	65.6519	61.995	64.4467	70.9206	67.4232	79.6077	76.6292	73.7089	77.3999	72.7262
	ENSMUSG00000024163.18	Mapk8ip3	-0.217952	7.11138	36.0931	3.80749e-06	4.11648e-05	131.421	131.841	131.054	136.044	131.422	122.791	161.368	148.83	147.676	149.867	152.582
	ENSMUSG00000026571.13	Dcaf6	-0.221079	5.72817	34.4692	5.29944e-06	5.44269e-05	48.3576	45.3583	47.4167	50.1451	49.6516	50.7109	56.8952	58.1377	56.2206	55.3787	56.6441
	ENSMUSG00000002052.7	Supt6	-0.2214	6.99282	41.1645	1.43584e-06	1.84522e-05	117.409	115.378	120.834	120.938	117.051	109.012	134.098	138.238	127.864	136.148	144.238
	ENSMUSG00000028886.16	Eya3	-0.221995	5.67875	34.653	5.1024e-06	5.26825e-05	49.9384	49.7261	45.0121	48.8937	50.1546	44.5235	55.1988	57.24	54.8122	55.5834	57.3042
	ENSMUSG00000063952.17	Brpf3	-0.223766	5.79588	36.7889	3.31409e-06	3.67416e-05	53.0281	49.3901	48.3185	52.1116	51.3043	50.966	60.035	59.2148	58.1455	59.2133	60.2883
	ENSMUSG00000035770.9	Dync1li2	-0.224573	7.28686	33.491	6.4979e-06	6.39486e-05	146.079	143.063	136.088	148.379	148.164	160.616	161.545	176.178	174.836	174.308	172.388
	ENSMUSG00000022124.16	Fbxl3	-0.224904	6.6886	31.8125	9.29947e-06	8.52647e-05	100.524	91.7245	87.6947	93.4075	95.8542	101.23	106.245	113.552	109.718	113.121	113.024
	ENSMUSG00000028465.17	Tln1	-0.227911	9.10194	48.9571	3.70761e-07	6.19147e-06	485.085	491.415	548.787	522.546	508.085	506.981	620.125	580.329	587.934	609.892	590.841
	ENSMUSG00000020700.12	Map3k3	-0.228556	6.92008	32.842	7.45397e-06	7.10453e-05	116.26	106.105	113.169	120.044	116.333	109.969	133.338	135.545	128.638	128.739	139.405
	ENSMUSG00000028397.14	Kdm4c	-0.22858	5.04027	32.7615	7.58301e-06	7.1987e-05	29.1727	29.3653	31.0351	30.2122	30.682	30.6179	35.6766	36.4445	35.2347	34.2324	35.254
	ENSMUSG00000018750.15	Zbtb4	-0.229753	8.23605	48.4279	4.04492e-07	6.62341e-06	287.847	277.525	293.518	277.183	289.646	300.566	346.613	344.218	340.305	328.698	327.189
	ENSMUSG00000026393.11	Nek7	-0.231044	6.68274	36.4309	3.55864e-06	3.89819e-05	95.1345	99.1834	88.5964	91.7092	95.8542	105.887	111.031	116.724	114.976	111.409	109.829
	ENSMUSG00000043733.15	Ptpn11	-0.232748	7.33385	56.5757	1.13251e-07	2.48426e-06	151.899	144.34	146.008	146.949	150.464	154.557	173.066	177.166	173.098	175.834	176.534
	ENSMUSG00000035944.18	Ttc38	-0.233481	5.43937	32.9099	7.34715e-06	7.02769e-05	41.6752	44.8207	42.0814	37.6312	41.7476	39.9308	50.4638	48.5628	46.9014	47.8397	49.2764
	ENSMUSG00000032652.14	Crebl2	-0.237888	5.90418	32.2593	8.44376e-06	7.86596e-05	62.5847	56.1771	57.4111	54.6143	55.0407	54.9208	69.4036	67.174	64.7183	67.9994	65.5962
	ENSMUSG00000031393.17	Mecp2	-0.237958	6.2821	53.0779	1.92293e-07	3.72599e-06	71.782	69.8854	67.6309	66.0556	71.4955	73.9932	81.6081	85.097	80.7746	80.9553	85.3754
	ENSMUSG00000025060.16	Slk	-0.238263	7.17127	37.1621	3.07839e-06	3.45903e-05	133.361	129.019	127.672	122.1	131.71	142.82	141.922	164.599	150.962	154.446	161.614
	ENSMUSG00000005615.16	Pcyt1a	-0.23892	6.87057	38.9131	2.19137e-06	2.60322e-05	110.368	103.282	112.042	109.586	109.291	112.457	123.134	134.468	132.582	124.663	131.324
	ENSMUSG00000028136.16	Snx27	-0.239302	5.97428	43.6225	9.20596e-07	1.29291e-05	58.5609	53.8252	61.3186	53.9886	58.7772	59.8963	66.3145	69.8669	66.1971	68.6882	69.7686
	ENSMUSG00000026924.18	Sec16a	-0.239436	6.5912	34.3028	5.48507e-06	5.59054e-05	88.8114	81.7121	91.2265	83.1282	87.5191	87.9627	97.2562	103.888	96.9952	101.134	112.734
	ENSMUSG00000070738.11	Dgkd	-0.23958	6.62725	34.319	5.4667e-06	5.58487e-05	90.1047	87.0879	80.8565	89.5639	90.9681	83.3062	102.599	105.384	97.7699	102.399	105.287
	ENSMUSG00000040720.16	Virma	-0.241124	5.78686	30.987	1.11394e-05	9.84591e-05	52.0222	50.0621	52.0758	48.0892	52.3103	49.3714	54.8189	63.7928	59.2723	57.8544	63.7477
	ENSMUSG00000030583.17	Sipa1l3	-0.246161	6.97997	33.6916	6.22992e-06	6.16943e-05	114.679	115.378	122.412	120.223	120.5	131.785	150.049	138.687	139.577	148.955	139.299
	ENSMUSG00000070939.10	Tgfbrap1	-0.247185	6.35935	62.1707	5.09142e-08	1.33576e-06	74.4406	72.3717	73.1165	76.8712	76.8127	77.9481	87.7103	92.7869	90.9389	85.1063	90.1287
	ENSMUSG00000026991.21	Pkp4	-0.247868	6.56943	38.4263	2.40611e-06	2.81046e-05	92.2603	84.8032	88.5964	85.9885	86.8724	92.9381	114.348	103.11	104.39	102.213	101.933
	ENSMUSG00000028530.15	Jak1	-0.248199	7.96278	41.3854	1.37865e-06	1.7862e-05	225.621	232.974	217.32	220.156	236.474	234.227	255.028	276.595	259.577	270.509	291.222
	ENSMUSG00000034101.15	Ctnnd1	-0.248381	9.02752	33.769	6.12984e-06	6.08615e-05	463.673	450.962	468.231	456.49	500.325	513.807	545.632	596.577	546.69	554.587	581.334
	ENSMUSG00000038902.15	Pogz	-0.248695	5.7441	53.1056	1.9147e-07	3.71832e-06	46.9206	49.1885	46.4399	45.944	50.945	51.1574	58.0093	57.7487	56.5023	58.3756	57.2514
	ENSMUSG00000025314.18	Ptprj	-0.249722	6.47762	41.7226	1.29603e-06	1.70192e-05	81.0511	83.6608	89.3479	74.2791	77.675	82.9873	95.9142	96.7665	97.676	99.5699	94.7236
	ENSMUSG00000019338.14	Zfp687	-0.250845	5.3519	42.3823	1.14957e-06	1.53738e-05	35.2802	33.9347	36.3704	38.9719	36.5022	37.3793	41.7536	41.7706	42.277	43.819	46.8469
	ENSMUSG00000048874.16	Phf3	-0.25099	6.57348	46.5587	5.53135e-07	8.52704e-06	85.3624	87.5583	84.9143	85.1841	90.6088	84.1354	101.814	106.401	97.3239	97.9505	110.066
	ENSMUSG00000024104.12	Washc2	-0.251531	6.39334	43.1231	1.00621e-06	1.38495e-05	77.2429	79.0914	81.3825	75.7092	76.7409	76.8637	94.1417	99.0106	90.2112	89.9834	90.0759
	ENSMUSG00000046020.14	Pofut1	-0.254802	5.80858	38.5004	2.37198e-06	2.77617e-05	53.9622	48.7854	49.1451	49.8769	51.5199	50.073	57.3257	61.0401	58.2629	62.0614	62.9554
	ENSMUSG00000045636.17	Mtus1	-0.2558	8.09102	56.6944	1.11281e-07	2.45413e-06	261.548	250.512	245.801	242.323	263.276	260.826	307.037	317.648	299.061	299.306	293.757
	ENSMUSG00000021134.18	Srsf5	-0.255962	9.05591	37.0161	3.16836e-06	3.54869e-05	481.349	494.976	458.312	439.864	475.391	521.652	571.105	570.395	572.018	572.457	571.775
	ENSMUSG00000042133.17	Ppig	-0.256444	5.79511	32.7808	7.55187e-06	7.18478e-05	47.8547	50.3309	45.7635	50.3239	49.2924	54.6657	59.326	61.9377	59.6009	56.4211	59.7601
	ENSMUSG00000032405.11	Pias1	-0.257864	6.183	36.8277	3.28868e-06	3.6576e-05	63.0158	67.8694	64.2493	62.0333	68.3339	73.6743	77.9619	80.7883	78.3568	78.6657	82.2593
	ENSMUSG00000020964.15	Sel1l	-0.259229	7.33307	43.2001	9.92462e-07	1.37092e-05	140.187	147.162	146.909	138.636	146.009	154.62	159.089	185.664	174.39	172.781	179.492
	ENSMUSG00000020850.15	Prpf8	-0.259789	8.13825	44.3252	8.13257e-07	1.16879e-05	262.77	253.603	258.876	266.457	248.258	249.982	301.821	307.055	285.352	303.047	339.151
	ENSMUSG00000014550.15	Rbsn	-0.25994	5.6052	38.8104	2.23485e-06	2.64766e-05	44.6931	43.2752	45.463	44.5138	44.9092	45.7993	52.6414	54.2179	52.5117	50.483	58.3077
	ENSMUSG00000025246.14	Tbl1x	-0.260261	6.7714	36.08	3.81758e-06	4.11973e-05	104.116	94.614	89.7988	96.0891	106.992	107.673	118.07	122.768	117.16	118.631	121.686
	ENSMUSG00000039852.18	Rere	-0.260646	7.43916	50.7078	2.79236e-07	5.00473e-06	155.492	149.313	139.846	153.117	154.488	147.604	183.245	174.563	181.737	184.602	174.157
	ENSMUSG00000034940.16	Synrg	-0.261353	6.20705	64.3434	3.78636e-08	1.05692e-06	68.6923	68.9446	66.0528	64.8936	66.2501	67.1042	76.544	83.1521	78.568	79.4102	83.923
	ENSMUSG00000001036.18	Epn2	-0.263342	7.42526	46.3765	5.7053e-07	8.72761e-06	149.815	151.866	161.788	147.217	155.278	166.485	183.751	179.111	181.807	184.993	203.126
	ENSMUSG00000045039.10	Megf8	-0.263648	6.67302	37.7454	2.74579e-06	3.13376e-05	92.1885	90.3806	95.2844	103.508	95.2075	96.8291	114.575	109.184	113.568	120.418	115.665
	ENSMUSG00000035437.16	Rabgap1	-0.264876	5.98589	31.9622	9.00276e-06	8.30244e-05	60.4291	56.0427	51.7752	56.0445	60.9328	60.7893	67.0234	79.0529	66.5962	66.1194	67.92
	ENSMUSG00000039686.15	Zer1	-0.265035	5.98621	48.3285	4.11196e-07	6.71428e-06	56.7645	60.2089	57.2608	59.173	56.0467	59.7687	73.4802	69.8669	66.3615	69.9726	70.0591
	ENSMUSG00000027878.12	Notch2	-0.265761	7.13525	74.2227	1.07554e-08	3.97382e-07	133.936	127.877	120.007	126.748	129.913	125.725	150.758	151.104	150.211	157.722	155.857
	ENSMUSG00000035649.18	Zcchc7	-0.265776	5.87775	34.8405	4.90944e-06	5.09617e-05	56.6208	52.75	50.2723	56.3127	52.8851	52.3694	64.7952	70.226	60.6572	58.9527	67.2335
	ENSMUSG00000045409.17	Trim39	-0.267269	5.72609	32.3891	8.21156e-06	7.69486e-05	51.3755	48.3822	51.5497	46.4803	49.5798	42.6737	57.8574	58.9755	59.8826	57.0726	57.0666
	ENSMUSG00000028411.16	Aptx	-0.268395	4.4651	32.2181	8.51901e-06	7.92759e-05	19.4724	18.3449	18.8615	21.1843	19.4726	19.5827	24.0292	23.6081	22.1831	22.9519	24.5061
	ENSMUSG00000024812.12	Tjp2	-0.268538	7.6592	36.0335	3.85339e-06	4.14299e-05	182.006	184.726	196.129	180.201	175.038	208.393	219.225	234.226	225.587	229.221	222.694
	ENSMUSG00000057133.15	Chd6	-0.269809	6.18061	32.0795	8.77743e-06	8.13767e-05	70.8479	63.9048	64.9256	60.7819	66.4656	69.3368	74.8728	82.2246	75.9859	77.8652	87.4352
	ENSMUSG00000044068.8	ENSMUSG00000044068.8	-0.270259	6.02016	31.3159	1.03627e-05	9.2913e-05	61.5787	65.9879	61.9198	62.0333	60.358	53.2624	79.3292	73.1882	72.7699	68.3531	73.2808
	ENSMUSG00000023977.16	Ubr2	-0.270495	6.48167	45.8248	6.26933e-07	9.4306e-06	80.6919	77.6803	79.2033	84.2902	82.4892	75.6517	96.7244	100.387	88.4272	94.5068	102.355
	ENSMUSG00000028890.14	Mtf1	-0.270714	4.82868	40.6022	1.59346e-06	2.0195e-05	25.0051	25.3334	25.9252	25.4748	26.6581	23.5375	30.0301	29.2334	29.953	29.9696	33.5111
	ENSMUSG00000041720.15	Pi4ka	-0.271369	6.22575	48.2721	4.15051e-07	6.76456e-06	67.7582	67.3318	71.5384	74.2791	67.8309	63.3408	84.8997	86.2041	77.2065	81.1414	84.8208
	ENSMUSG00000035248.10	Tut7	-0.271501	6.77411	44.5558	7.81056e-07	1.1313e-05	98.2961	94.8156	93.3306	88.0444	100.74	95.4258	111.967	120.255	110.376	108.673	122.98
	ENSMUSG00000034610.15	Tut4	-0.271728	5.17687	34.8809	4.86898e-06	5.06452e-05	33.7713	31.1124	28.7055	30.1228	31.5442	34.7641	34.6385	39.5564	37.9108	38.5138	40.7467
	ENSMUSG00000021277.17	Traf3	-0.272752	5.57081	47.1087	5.04027e-07	7.90443e-06	42.6812	40.2513	43.434	45.4971	43.1847	46.4371	51.3247	52.9612	51.7371	53.2008	53.9769
	ENSMUSG00000008206.17	Cers4	-0.274229	6.39738	50.6232	2.83044e-07	5.04188e-06	76.3088	77.3443	76.7986	77.7651	74.0104	85.0922	97.484	101.434	87.8638	89.9089	94.4596
	ENSMUSG00000021156.18	Zmynd11	-0.274257	7.49923	54.3153	1.59008e-07	3.19832e-06	164.186	154.151	167.8	165.988	163.038	171.524	198.842	207.087	196.667	198.265	193.54
	ENSMUSG00000022994.10	Adcy6	-0.274723	6.66904	50.4887	2.89211e-07	5.10482e-06	96.859	86.6175	90.7756	99.3069	98.1536	93.7035	118.601	106.551	110.634	114.629	119.441
	ENSMUSG00000002496.11	Tsc2	-0.274727	7.12285	56.5118	1.14328e-07	2.49221e-06	134.87	120.619	130.528	123.262	124.812	132.933	156.785	156.221	150.023	156.066	154.246
	ENSMUSG00000061455.14	Stx17	-0.274804	5.62545	31.1018	1.08614e-05	9.64416e-05	48.8606	39.9825	42.1566	43.173	43.4721	50.5833	50.6411	55.714	52.23	54.9692	57.0402
	ENSMUSG00000022401.13	Xpnpep3	-0.274944	4.31331	44.5735	7.78641e-07	1.12874e-05	19.2568	18.8153	17.584	17.0726	18.0355	17.5415	20.5096	22.0223	21.7371	22.3376	22.6576
	ENSMUSG00000048578.12	Mlec	-0.276093	7.70711	44.475	7.92167e-07	1.14454e-05	191.491	192.857	199.21	204.513	203.421	199.909	243.381	224.532	246.056	236.89	251.294
	ENSMUSG00000028106.14	Rprd2	-0.276224	5.69324	32.0635	8.80777e-06	8.15713e-05	46.202	46.299	41.856	43.62	47.4241	48.1594	50.1346	57.2699	53.0751	55.3601	60.4467
	ENSMUSG00000036580.16	Spg20	-0.277015	5.82368	45.501	6.62837e-07	9.86281e-06	53.603	49.2557	50.4977	51.1283	50.945	52.7521	62.0606	63.5535	59.953	58.7479	66.9694
	ENSMUSG00000059981.13	Taok2	-0.278053	7.98417	50.6963	2.7975e-07	5.0088e-06	218.436	215.435	230.246	241.608	241.504	240.797	276.424	281.024	279.812	288.788	276.407
	ENSMUSG00000070733.14	Fryl	-0.278529	6.22418	48.1896	4.2076e-07	6.83842e-06	71.279	68.4742	64.0239	65.2512	71.7829	68.4438	80.418	82.5238	77.0891	84.3804	89.3893
	ENSMUSG00000050332.8	Amer1	-0.281053	4.34412	33.9929	5.8499e-06	5.8664e-05	18.2509	17.2025	18.7112	18.5027	17.4607	18.6259	21.2186	23.5184	21.1267	20.7181	23.5819
	ENSMUSG00000041439.16	Mfsd6	-0.281214	6.44307	50.6803	2.80467e-07	5.01133e-06	86.512	82.1153	71.5384	82.5919	79.6151	82.6045	101.51	102.362	96.9483	94.6929	95.7007
	ENSMUSG00000004661.16	Arid3b	-0.281551	4.95555	40.4114	1.65111e-06	2.08177e-05	30.1068	29.2981	25.85	28.2457	30.3227	27.4285	32.7141	34.7988	34.8122	35.945	35.2012
	ENSMUSG00000031134.17	Rbmx	-0.28315	6.06406	34.9825	4.76867e-06	4.97671e-05	58.5609	62.1576	60.5672	54.3462	64.5256	64.8717	70.5177	78.7536	73.0281	75.3336	72.8318
	ENSMUSG00000033902.13	Mapkbp1	-0.2849	5.78508	46.0772	6.00406e-07	9.08895e-06	47.9265	50.0621	53.2029	46.9272	52.9569	51.2212	59.8324	62.1472	61.1502	60.4791	63.4572
	ENSMUSG00000022723.17	Crybg3	-0.284962	6.10858	43.3765	9.61741e-07	1.33427e-05	65.7463	59.4697	57.4111	62.9272	65.8908	61.2996	76.1895	80.4592	71.0798	71.3687	79.4337
	ENSMUSG00000029775.15	Klhdc10	-0.286047	5.96824	33.4787	6.51467e-06	6.40775e-05	59.2794	56.3115	51.6249	51.2177	58.1305	64.0424	65.96	71.6622	67.676	70.0843	71.0625
	ENSMUSG00000030451.17	Herc2	-0.28619	6.42017	66.9559	2.67798e-08	8.13611e-07	80.9074	73.7828	78.1512	79.9103	80.2618	79.8617	91.9895	102.332	90.9154	98.5461	96.7306
	ENSMUSG00000022255.17	Mtdh	-0.287116	6.43651	35.9949	3.88336e-06	4.17264e-05	74.9436	78.2178	72.891	68.8266	78.8965	88.0264	88.1408	96.3176	90.4225	97.5409	97.5228
	ENSMUSG00000025583.17	Rptor	-0.287603	5.52273	38.7802	2.24782e-06	2.66122e-05	41.8189	37.2946	40.7288	47.2848	41.0291	42.291	51.1475	52.1234	50.6103	51.4324	49.1707
	ENSMUSG00000025558.20	Dock9	-0.288153	7.67682	73.0885	1.23437e-08	4.47529e-07	187.682	187.011	181.777	179.307	186.607	190.277	215.63	232.251	224.953	227.676	231.805
	ENSMUSG00000034973.17	Dop1a	-0.288866	5.14686	31.7839	9.35748e-06	8.57065e-05	30.7534	32.2548	31.4108	30.0334	32.9813	31.5747	35.4234	42.0997	36.3615	36.6895	42.0407
	ENSMUSG00000000127.16	Fer	-0.288992	3.91514	36.5086	3.50395e-06	3.85337e-05	14.5863	12.9691	13.9019	13.229	13.7243	13.3953	16.6356	18.2522	16.7371	15.9528	15.7653
	ENSMUSG00000042810.15	Krba1	-0.288996	5.08392	36.4696	3.53128e-06	3.87466e-05	31.9031	30.3061	26.8269	31.9999	30.7538	30.873	39.7532	36.3847	37.0422	36.0753	36.7064
	ENSMUSG00000040771.15	Oard1	-0.289363	4.59183	31.9926	8.94374e-06	8.25674e-05	22.4184	21.5032	22.3182	21.1843	21.1971	19.8378	27.9285	25.0743	25.8685	25.7441	26.1698
	ENSMUSG00000046897.18	Zfp740	-0.289416	7.23236	72.0392	1.40419e-08	4.90733e-07	135.013	132.245	133.759	141.586	140.045	135.612	166.001	160.888	162.887	168.537	174.95
	ENSMUSG00000050947.10	Amigo1	-0.290555	5.01005	31.5832	9.77494e-06	8.86915e-05	32.9809	28.4245	30.6593	31.4636	28.2389	28.0026	39.2975	37.3721	34.2253	33.4878	38.7926
	ENSMUSG00000038371.16	Sbf2	-0.290786	6.10322	37.3702	2.95499e-06	3.33541e-05	59.5668	56.1771	62.4458	65.5193	62.1544	64.9992	74.6449	78.4544	69.4131	75.1847	80.3052
	ENSMUSG00000027189.17	Trim44	-0.290993	7.5513	48.09	4.27771e-07	6.90731e-06	172.306	163.626	157.054	164.469	177.05	183.516	190.537	212.982	198.967	216.675	218.918
	ENSMUSG00000047909.12	Ankrd16	-0.29117	5.42638	40.0588	1.76376e-06	2.18919e-05	38.2981	35.749	34.5669	38.4356	39.592	37.2518	45.1718	48.5029	43.2394	44.2285	47.1902
	ENSMUSG00000022361.15	Zhx1	-0.291194	6.20897	44.2852	8.18975e-07	1.17548e-05	67.3271	68.1382	67.706	61.5864	64.5974	73.9932	76.8984	84.1695	84.8356	83.7661	81.8896
	ENSMUSG00000022957.21	Itsn1	-0.291931	5.95424	53.2862	1.86197e-07	3.64024e-06	55.1119	58.1258	57.7868	56.2233	54.8252	62.2564	74.2904	72.4701	67.8169	70.0843	66.7845
	ENSMUSG00000001768.17	Rin2	-0.292354	7.60073	49.7385	3.26414e-07	5.64716e-06	167.419	178.812	183.655	173.586	167.853	174.458	214.769	212.114	211.291	205.581	223.539
	ENSMUSG00000058230.13	Arhgap35	-0.293083	7.13637	55.4475	1.33986e-07	2.79161e-06	127.828	124.651	130.678	135.15	131.422	126.745	157.646	163.282	148.897	152.715	170.223
	ENSMUSG00000053470.14	Kdm3a	-0.293954	5.83439	48.7825	3.81537e-07	6.33679e-06	54.8245	48.651	47.2665	52.1116	54.6815	47.394	59.3513	64.3913	60.2112	62.1544	65.3585
	ENSMUSG00000054611.18	Kdm2a	-0.294326	6.95027	65.8901	3.08054e-08	9.04404e-07	114.319	110.069	106.406	112.804	117.123	108.247	133.794	140.572	133.098	133.505	142.68
	ENSMUSG00000017119.21	Nbr1	-0.294367	7.30985	71.647	1.47404e-08	5.0802e-07	145.863	142.391	143.678	136.759	150.895	150.729	181.776	188.805	168.732	170.362	179.967
	ENSMUSG00000047409.14	Ctdspl	-0.295318	7.3528	42.8629	1.05423e-06	1.43742e-05	143.564	139.435	143.753	144.983	145.29	164.125	185.22	179.53	173.451	176.225	186.807
	ENSMUSG00000025266.12	Gnl3l	-0.296301	5.27471	37.8695	2.68018e-06	3.06892e-05	32.9091	34.4723	34.5669	33.877	37.077	40.2498	40.7154	46.1092	44.6948	43.4839	43.3347
	ENSMUSG00000035275.15	Raver2	-0.296697	5.79664	56.0522	1.22404e-07	2.61775e-06	52.4533	50.5997	52.3763	46.3909	48.7175	52.5607	60.9718	64.0921	60.1408	61.838	63.4308
	ENSMUSG00000051586.18	Mical3	-0.29723	5.89684	42.4536	1.13486e-06	1.52354e-05	54.1059	53.1532	53.2029	52.6479	56.7652	54.6019	69.201	59.8133	61.1971	67.8133	74.2578
	ENSMUSG00000005774.13	Rfx5	-0.297431	5.24208	54.8171	1.47343e-07	3.01232e-06	34.2743	33.4643	31.6362	33.1619	31.185	35.4019	40.8167	39.676	41.2676	40.7475	41.4862
	ENSMUSG00000020422.15	Tns3	-0.29747	8.73958	43.9332	8.71341e-07	1.24043e-05	367.748	361.925	408.941	397.138	405.62	399.819	483.546	467.764	464.929	497.738	483.679
	ENSMUSG00000025220.9	Oga	-0.297513	7.20295	41.8774	1.25995e-06	1.6633e-05	131.349	142.66	127.822	118.257	134.512	136.569	148.505	163.761	158.286	170.585	169.43
	ENSMUSG00000029007.9	Agtrap	-0.298898	6.59127	32.8105	7.50416e-06	7.14719e-05	82.3445	88.3647	94.4578	89.117	86.0101	89.6211	113.335	101.285	102.653	105.08	120.893
	ENSMUSG00000058690.15	Ccser2	-0.299518	6.73575	37.9731	2.62673e-06	3.01762e-05	95.4938	88.7006	93.6312	91.9773	98.7284	112.393	109.157	122.918	120.117	120.884	122.953
	ENSMUSG00000032531.16	Amotl2	-0.299762	8.01264	39.8415	1.83732e-06	2.25324e-05	219.514	229.211	236.633	218.636	244.809	249.855	268.701	280.784	290.563	282.422	312.427
	ENSMUSG00000030059.16	Tmf1	-0.30114	5.08759	31.115	1.08299e-05	9.62114e-05	31.975	29.8357	28.7807	31.2848	30.8975	28.6405	33.651	41.1721	35.8216	35.1445	40.5091
	ENSMUSG00000010277.8	Bltp2	-0.302323	7.62393	47.8283	4.46799e-07	7.15494e-06	182.868	169.136	184.933	186.011	173.96	169.866	214.516	230.307	203.028	206.549	241.761
	ENSMUSG00000040481.18	Bptf	-0.302792	6.48375	63.8334	4.05617e-08	1.11045e-06	81.6978	75.4627	77.8506	80.8936	82.13	81.8391	94.9773	101.614	92.3943	98.8998	105.419
	ENSMUSG00000036046.15	5031439G07Rik	-0.303265	6.26649	80.6771	5.05971e-09	2.20591e-07	63.3751	68.1382	68.4575	66.9495	69.8428	71.5693	83.7603	81.8954	85.0938	85.4972	83.6853
	ENSMUSG00000039473.9	Ubn1	-0.303422	6.66178	57.8431	9.40296e-08	2.13573e-06	93.2663	90.851	84.5386	85.4522	94.3453	89.8763	104.878	109.902	106.361	115.225	117.355
	ENSMUSG00000073198.6	Bnip3l-ps	-0.303717	4.40418	33.3849	6.64452e-06	6.50246e-05	17.8198	20.6968	17.6592	19.7541	19.1852	19.5189	22.7125	25.0145	22.6995	23.1753	24.3741
	ENSMUSG00000062627.10	Mysm1	-0.303724	5.20469	34.2063	5.59593e-06	5.6836e-05	31.9031	33.8003	31.0351	29.6759	31.3287	35.976	35.8285	42.728	39.0141	41.1943	40.7732
	ENSMUSG00000031732.13	Phlpp2	-0.304401	4.504	34.0759	5.7497e-06	5.78881e-05	19.185	19.0841	18.7864	20.201	19.8319	21.0498	23.6747	24.5058	21.7605	24.0129	27.675
	ENSMUSG00000020647.11	Ncoa1	-0.305495	5.72787	52.8131	2.00358e-07	3.84383e-06	45.9146	46.5006	46.8156	45.8546	42.7536	51.8591	55.4013	58.8857	53.6854	59.567	60.658
	ENSMUSG00000004677.19	Myo9b	-0.306023	6.6768	76.5709	8.12828e-09	3.22891e-07	84.2127	90.179	96.111	94.3014	92.98	93.1932	112.195	114.899	110.892	113.68	115.929
	ENSMUSG00000034354.18	Mtmr3	-0.306423	7.16347	55.4267	1.34404e-07	2.79699e-06	124.02	120.754	128.95	126.838	133.722	131.21	156.025	158.944	152.394	156.698	164.836
	ENSMUSG00000016028.12	Celsr1	-0.306527	5.61263	53.1195	1.91059e-07	3.71447e-06	47.0643	43.544	42.5323	47.1954	44.047	41.1428	53.7048	55.9833	57.1361	52.0839	54.6107
	ENSMUSG00000033769.17	Exoc6b	-0.306557	5.65404	36.8145	3.29732e-06	3.66021e-05	41.1004	42.6704	43.5843	48.8043	46.7056	46.5647	55.5279	59.2448	54.7417	55.1739	52.8942
	ENSMUSG00000040687.17	Madd	-0.306838	6.22921	44.6509	7.68173e-07	1.12027e-05	66.6804	67.1975	68.6829	78.212	68.9806	66.1474	88.6219	88.6577	82.5821	86.2046	82.3649
	ENSMUSG00000063870.13	Chd4	-0.307375	7.81357	59.9977	6.90009e-08	1.67126e-06	211.466	195.209	208.303	203.262	198.75	207.372	259.181	259.211	242.699	242.531	259.005
	ENSMUSG00000029434.13	Vps33a	-0.307449	5.71491	64.6454	3.6358e-08	1.03097e-06	47.4235	44.4847	45.8387	48.1786	45.4841	51.0936	59.1234	59.544	58.2629	57.538	56.9081
	ENSMUSG00000040697.11	Dnajc16	-0.307881	5.19902	61.7585	5.39032e-08	1.39056e-06	34.8491	35.9506	31.6362	33.2513	31.7598	31.8936	40.6141	41.4115	40.7277	40.4125	42.516
	ENSMUSG00000000804.15	Usp32	-0.307997	5.38318	35.9271	3.93666e-06	4.21951e-05	34.7054	37.429	33.9657	35.2178	37.7956	41.0152	41.8295	48.1738	43.8732	47.0207	46.4244
	ENSMUSG00000078716.11	Tmem8b	-0.308371	4.82519	55.3347	1.36276e-07	2.82583e-06	25.7955	23.3847	27.2026	24.7597	24.5025	27.1096	31.7266	32.8838	30.5634	31.3844	31.1344
	ENSMUSG00000027475.10	Kif3b	-0.308497	5.70848	54.1919	1.62028e-07	3.24782e-06	48.3576	46.635	44.6364	48.6255	45.4122	44.5235	54.1859	61.5188	56.5727	54.9319	59.8658
	ENSMUSG00000022228.15	Zscan26	-0.30973	6.87836	52.6001	2.07113e-07	3.9517e-06	104.404	110.876	97.163	100.737	107.998	115.327	121.032	140.422	130.164	134.286	131.8
	ENSMUSG00000040043.18	Rbms2	-0.309986	5.87476	38.4389	2.40026e-06	2.8055e-05	52.3096	50.7341	45.9138	54.2568	53.6036	48.8611	66.3904	62.9251	62.3708	58.115	65.9395
	ENSMUSG00000033653.19	Vps8	-0.312123	4.41098	36.1923	3.73253e-06	4.04798e-05	18.8976	17.6729	19.6129	19.8435	18.0355	19.3913	24.0545	22.7703	23.2629	23.3242	23.8988
	ENSMUSG00000075595.10	Zfp652	-0.312403	7.03872	75.261	9.49479e-09	3.63113e-07	120.499	116.05	120.007	120.044	121.866	126.363	144.352	150.476	150.939	147.075	157.283
	ENSMUSG00000042185.15	Nfrkb	-0.312414	5.38351	40.4081	1.65214e-06	2.08177e-05	36.7892	35.9506	36.5958	36.3798	38.586	35.083	44.1337	45.5407	43.3803	44.7497	49.2235
	ENSMUSG00000031539.7	Ap3m2	-0.313008	5.04551	30.9997	1.11082e-05	9.8283e-05	31.2564	27.3494	27.8038	26.1899	28.67	26.7907	34.208	36.0256	35.399	32.4826	35.9934
	ENSMUSG00000014444.18	Piezo1	-0.313498	7.51846	44.6235	7.71871e-07	1.12266e-05	154.845	154.151	175.164	186.189	158.512	181.156	211.553	201.253	205.352	213.12	214.482
	ENSMUSG00000082454.4	Gm12183	-0.314514	6.72232	60.9146	6.06354e-08	1.53028e-06	92.907	97.9067	103.626	89.6533	92.5489	94.0862	122.627	123.486	113.92	113.382	118.2
	ENSMUSG00000021338.18	Carmil1	-0.315977	5.83782	39.8709	1.82717e-06	2.24605e-05	50.154	46.635	52.5266	47.1954	49.8672	52.178	64.3648	68.1315	61.0798	60.0882	56.2215
	ENSMUSG00000039840.9	Epg5	-0.316398	4.76898	42.5211	1.12111e-06	1.50857e-05	24.8614	23.9223	22.0927	23.1508	25.7959	23.1548	28.2577	30.52	29.2253	29.6346	30.7911
	ENSMUSG00000026944.19	Abca2	-0.316735	6.45577	40.0853	1.755e-06	2.17988e-05	83.1349	81.0401	83.4114	86.1673	76.5253	70.0384	105.485	99.5492	99.7417	92.7942	100.745
	ENSMUSG00000028086.16	Fbxw7	-0.317188	4.85225	33.2587	6.82381e-06	6.62955e-05	25.077	23.1831	26.1506	26.9943	25.1492	28.0664	31.6507	35.3973	30.3756	30.8259	32.3228
	ENSMUSG00000000275.17	Trim25	-0.317197	7.22715	37.1255	3.10072e-06	3.48187e-05	113.673	114.706	108.886	108.067	109.507	110.671	138.25	141.649	142.113	124.514	144.607
	ENSMUSG00000030779.17	Rbbp6	-0.317852	6.51174	67.6263	2.45427e-08	7.65652e-07	81.5541	83.2576	75.1454	73.4746	80.2618	86.9421	97.3574	102.392	96.4084	100.315	103.095
	ENSMUSG00000045098.20	Kmt5b	-0.319124	6.51444	60.3023	6.60897e-08	1.63249e-06	81.0511	80.5025	72.2147	79.4634	82.0581	89.4936	97.0536	101.404	99.7182	101.934	104.072
	ENSMUSG00000058318.16	Phf21a	-0.319302	6.00628	62.5015	4.86457e-08	1.29913e-06	54.8245	56.1771	58.9891	56.4914	58.4179	60.5979	76.3161	68.7299	70.7276	71.741	71.7755
	ENSMUSG00000036333.12	Kidins220	-0.320209	7.15045	60.3249	6.58792e-08	1.63249e-06	133.648	121.963	124.666	126.838	129.842	137.972	153.974	166.454	154.178	160.626	171.147
	ENSMUSG00000030094.9	Xpc	-0.320541	5.74706	46.8123	5.29872e-07	8.21738e-06	44.0464	45.4255	50.8734	55.4188	45.6278	50.1368	59.9337	58.9755	58.9201	61.2423	64.0117
	ENSMUSG00000051786.16	Tubgcp6	-0.320717	5.22968	39.7347	1.87468e-06	2.28939e-05	32.9091	34.4723	33.3646	34.2345	32.5502	31.8936	40.0571	43.4162	39.2018	40.9337	43.9421
	ENSMUSG00000045639.15	Zfp629	-0.321388	5.30985	48.1521	4.23383e-07	6.86826e-06	38.5137	34.6067	32.9888	34.0558	36.0711	36.9328	44.1843	45.8997	46.6901	41.7155	43.6516
	ENSMUSG00000026313.17	Hdac4	-0.322144	4.82505	41.6937	1.30291e-06	1.70709e-05	26.1548	25.1318	22.7691	23.3295	26.8018	26.4717	30.6125	30.909	32.8873	31.6636	31.0288
	ENSMUSG00000021360.17	Gcnt2	-0.322248	6.8277	70.0903	1.79094e-08	5.92641e-07	104.907	101.603	93.7063	99.2175	95.7824	99.6995	120.602	133.39	124.437	116.844	124.696
	ENSMUSG00000055538.8	Zcchc24	-0.32231	6.61868	38.1102	2.55777e-06	2.95593e-05	84.8594	81.1073	90.2496	89.8321	91.6148	88.0264	115.462	102.841	108.568	108.393	112.364
	ENSMUSG00000023921.10	Mmut	-0.322652	5.75665	39.2747	2.04532e-06	2.45819e-05	53.3874	48.315	47.2665	48.9831	48.502	49.1162	64.8206	64.6007	61.3849	58.1709	59.1528
	ENSMUSG00000005534.11	Insr	-0.322792	6.24889	46.9791	5.15155e-07	8.05721e-06	68.7641	69.751	59.966	60.9607	70.4177	71.1866	79.8609	81.0576	80.0938	87.6379	89.627
	ENSMUSG00000062232.15	Rapgef2	-0.32315	5.72577	40.0221	1.77596e-06	2.19652e-05	45.4116	45.1567	42.9832	46.1227	44.9092	48.287	51.9071	60.0826	53.4741	55.8999	63.2459
	ENSMUSG00000024727.10	Trpm6	-0.323236	5.28185	31.2644	1.04805e-05	9.37759e-05	35.1365	34.3379	32.0871	33.6088	31.1131	33.8073	43.2221	44.3737	39.0141	37.9553	44.2061
	ENSMUSG00000001855.16	Nup214	-0.323318	5.87293	70.9128	1.61518e-08	5.45637e-07	50.3695	52.2796	51.3995	54.4356	53.5318	49.6265	65.4029	65.3488	62.4882	67.7761	63.7741
	ENSMUSG00000038084.17	Opa1	-0.323772	5.64765	39.7935	1.85401e-06	2.27211e-05	44.0464	42.8048	42.382	38.7038	43.7595	47.5215	49.6029	58.8857	52.9108	55.1367	54.1617
	ENSMUSG00000042105.19	Inpp5f	-0.323815	4.94322	38.5804	2.33574e-06	2.73928e-05	26.9452	28.0885	26.9772	24.3128	25.5084	29.8524	31.7519	34.3799	36.2911	33.3947	33.0622
	ENSMUSG00000038244.15	Mical2	-0.323976	7.62878	47.7325	4.53988e-07	7.25674e-06	182.94	169.875	189.366	180.111	183.014	192.382	235.608	247.392	224.037	216.936	221.189
	ENSMUSG00000033904.17	Ccp110	-0.32484	4.89661	32.1436	8.65689e-06	8.03446e-05	28.3823	27.1478	22.6188	23.7765	28.3108	28.3216	30.8151	34.8287	32.4648	33.6926	33.96
	ENSMUSG00000095597.3	Rps7-ps3	-0.32487	6.42142	34.4562	5.31377e-06	5.4523e-05	80.6919	83.5264	73.1165	69.8098	74.7289	63.5321	89.2802	99.7287	89.8591	90.6349	95.5423
	ENSMUSG00000042249.12	Grk3	-0.324933	6.53455	36.0454	3.84419e-06	4.13565e-05	88.0928	85.072	70.4864	79.374	80.621	83.4338	93.4328	103.918	98.9201	104.131	108.191
	ENSMUSG00000055322.17	Tns1	-0.325045	10.8747	39.8734	1.82629e-06	2.24605e-05	1608.59	1605.62	1784.63	1635.39	1742.55	1724.04	2204.13	1988.53	2011.1	2246.31	2094.35
	ENSMUSG00000022822.17	Abcc5	-0.325765	6.97789	92.2833	1.45879e-09	8.91385e-08	106.487	108.591	109.111	110.569	116.692	120.877	137.339	136.831	144.906	142.551	140.646
	ENSMUSG00000028906.18	Epb41	-0.325939	7.34213	53.015	1.94178e-07	3.75683e-06	150.103	153.21	133.609	135.329	147.518	135.165	176.94	166.244	180	184.9	185.011
	ENSMUSG00000037410.14	Tbc1d2b	-0.326451	6.93019	56.0214	1.22965e-07	2.62471e-06	104.619	98.5115	108.811	101.631	113.243	111.883	127.565	132.343	126.995	131.289	149.334
	ENSMUSG00000027864.10	Ptgfrn	-0.32648	8.56089	36.2173	3.71388e-06	4.03057e-05	337.641	321.54	357.692	333.585	320.903	413.023	428.145	459.267	445.469	419.873	425.583
	ENSMUSG00000028991.16	Mtor	-0.327385	5.74702	47.6393	4.6111e-07	7.35036e-06	46.9206	47.7774	48.9197	49.8769	45.3403	43.5667	58.4398	62.8054	52.3943	58.1895	63.3516
	ENSMUSG00000020863.16	Luc7l3	-0.327393	7.20903	62.3908	4.93924e-08	1.30747e-06	129.481	134.597	126.244	130.145	138.68	147.285	162.457	167.77	173.31	172.465	167.371
	ENSMUSG00000015597.18	Zfp318	-0.327825	5.19816	39.5132	1.95484e-06	2.36739e-05	35.4958	29.4997	30.8848	32.1787	31.9035	31.7023	38.9683	42.5784	37.1126	40.0216	41.803
	ENSMUSG00000024462.18	Gabbr1	-0.327919	6.25648	67.4545	2.50957e-08	7.77344e-07	68.1893	70.2213	62.2204	68.5584	71.4955	70.166	84.8491	84.0198	85.1643	89.5552	86.194
	ENSMUSG00000058793.15	Cds2	-0.328326	8.24848	67.4928	2.49714e-08	7.76251e-07	267.871	259.785	266.691	277.452	286.557	269.884	334.256	341.435	315.305	337.801	374.801
	ENSMUSG00000074305.10	Peak1	-0.328412	6.69469	45.8643	6.2269e-07	9.39368e-06	94.3441	90.9854	91.1514	84.5584	97.6506	92.8105	109.283	113.852	111.291	115.541	127.284
	ENSMUSG00000039202.13	Abhd2	-0.32856	8.4568	54.588	1.52548e-07	3.10056e-06	298.337	304.27	310.2	302.39	318.101	329.78	368.971	386.886	379.155	372.275	442.51
	ENSMUSG00000013629.17	Cad	-0.328635	5.04502	35.1312	4.62588e-06	4.85092e-05	28.4541	29.7685	29.457	33.0725	30.6101	28.5767	40.1837	35.6965	36.7605	40.4683	34.9371
	ENSMUSG00000121345.1	ENSMUSG00000121345.1	-0.328666	4.86014	32.8412	7.4553e-06	7.10453e-05	23.7836	25.199	26.0755	28.6926	24.3588	26.089	29.9289	31.8366	32.0892	32.222	35.1484
	ENSMUSG00000033565.19	Rbfox2	-0.329564	6.63497	42.125	1.20443e-06	1.60337e-05	83.8534	79.0914	84.9894	88.0444	95.9261	92.3002	106.017	107.448	110.54	110.218	114.714
	ENSMUSG00000026510.11	Trp53bp2	-0.329575	6.98284	33.0636	7.11139e-06	6.85547e-05	109.577	105.097	119.256	123.173	108.86	120.813	150.353	150.476	142.512	138.195	137.557
	ENSMUSG00000034243.18	Golgb1	-0.329606	6.72016	66.0584	3.01282e-08	8.90517e-07	98.2961	92.0605	92.8797	91.888	96.2854	91.0882	114.094	124.803	113.944	111.521	124.802
	ENSMUSG00000005682.10	Pan2	-0.329755	5.92488	56.0055	1.23257e-07	2.62773e-06	53.3156	56.1771	52.7521	50.5026	51.8791	61.1082	68.8465	69.059	65.1408	69.6375	68.7651
	ENSMUSG00000032411.16	Tfdp2	-0.329851	6.01606	33.1894	6.92443e-06	6.70489e-05	60.2854	58.7306	54.4804	49.5194	54.4659	63.6597	67.3526	77.3473	69.2253	69.5445	74.3371
	ENSMUSG00000028552.14	Eps15	-0.330031	6.68327	40.9226	1.50147e-06	1.91825e-05	92.1885	89.6414	81.3825	85.8098	90.034	104.292	102.219	121.96	110.751	117.384	117.17
	ENSMUSG00000035498.11	Cdcp1	-0.330767	5.32881	69.6825	1.88571e-08	6.19301e-07	35.3521	33.7331	34.7923	35.5753	34.4184	36.2312	42.9436	42.8477	41.784	43.5211	49.1179
	ENSMUSG00000061410.7	Zcchc14	-0.330775	6.88466	56.3422	1.17238e-07	2.54292e-06	101.386	100.259	104.076	104.581	108.501	109.969	131.971	128.723	133.357	131.457	133.516
	ENSMUSG00000032855.7	Pkd1	-0.331221	7.7803	50.2208	3.01938e-07	5.29196e-06	188.544	181.299	196.505	209.608	199.469	208.01	244.166	236.141	242.418	252.49	265.369
	ENSMUSG00000030213.13	Atf7ip	-0.331408	6.75148	45.6298	6.48288e-07	9.67937e-06	96.7153	99.9226	82.9605	100.29	92.4771	98.8703	112.499	117.263	114.53	122.373	132.301
	ENSMUSG00000033478.6	Fhip2a	-0.331641	5.71705	58.6557	8.35884e-08	1.94619e-06	48.5013	46.7694	44.1855	42.5473	49.2924	52.8159	60.4654	59.5739	57.5821	60.628	60.0242
	ENSMUSG00000040848.12	Sft2d2	-0.331724	7.25176	47.4551	4.75538e-07	7.52532e-06	135.66	130.161	123.539	144.357	141.913	136.058	168.28	162.265	162.183	171.199	187.229
	ENSMUSG00000033396.14	Spg11	-0.331958	4.99095	53.0104	1.94315e-07	3.75683e-06	26.2267	26.4758	29.6073	29.944	26.4425	29.087	35.2968	35.7264	32.3004	34.4744	38.1324
	ENSMUSG00000038764.15	Ptpn3	-0.331959	5.2873	31.381	1.02162e-05	9.19302e-05	37.7233	37.1602	30.5842	31.3742	37.0052	33.4883	43.9311	45.1218	44.8826	40.2822	43.5459
	ENSMUSG00000050064.15	Zfp697	-0.332839	5.2987	34.015	5.82304e-06	5.85291e-05	33.9869	32.9268	32.1622	32.0893	37.1489	37.4431	41.3484	43.8651	43.8967	46.7042	40.2714
	ENSMUSG00000034525.8	Ice1	-0.33285	5.95036	56.0547	1.22356e-07	2.61775e-06	56.2616	52.8172	52.8272	54.078	56.1186	54.9208	66.9728	69.7173	64.46	65.9704	76.212
	ENSMUSG00000024169.17	Ift140	-0.333677	4.67356	36.2169	3.71416e-06	4.03057e-05	25.6518	23.1159	22.9193	24.0446	21.9157	21.305	27.8273	31.3578	29.3897	27.922	29.3915
	ENSMUSG00000023088.18	Abcc1	-0.333879	5.55187	31.2744	1.04574e-05	9.36169e-05	43.3279	39.3777	41.9311	40.4915	38.9453	38.3362	51.2234	51.6447	47.9577	45.6618	58.1757
	ENSMUSG00000052062.15	Pard3b	-0.333938	4.81553	32.4014	8.18991e-06	7.68283e-05	24.7896	24.7287	22.9193	22.8826	24.215	28.194	29.7263	32.3153	30.0704	32.0917	31.1872
	ENSMUSG00000015501.11	Hivep2	-0.334231	5.68985	43.5621	9.30523e-07	1.30445e-05	45.6272	43.4096	46.4399	41.9216	48.0708	50.1368	58.2879	59.3345	56.9014	54.8202	60.4995
	ENSMUSG00000022701.19	Ccdc191	-0.334544	3.69379	31.7792	9.36694e-06	8.57481e-05	13.0055	11.8939	11.873	10.4581	10.9938	10.7163	15.4962	14.9907	14.5775	13.142	14.3393
	ENSMUSG00000035901.15	Dennd5a	-0.335476	7.80465	53.8085	1.71817e-07	3.39718e-06	197.957	188.489	202.442	202.01	203.205	218.727	253.408	262.083	246.948	245.304	267.64
	ENSMUSG00000048000.16	Gigyf2	-0.335857	5.87807	51.2635	2.55573e-07	4.7014e-06	50.0821	53.6908	51.5497	49.6982	53.2444	53.2624	60.4148	66.8449	61.1032	69.3583	70.0591
	ENSMUSG00000052534.16	Pbx1	-0.337477	6.95412	68.5806	2.17012e-08	6.99532e-07	110.942	109.397	112.117	98.2343	115.039	110.799	134.553	135.395	131.033	139.163	151.368
	ENSMUSG00000038872.11	Zfhx3	-0.339133	5.0854	31.6827	9.56541e-06	8.70622e-05	27.6637	31.7172	28.1044	26.2792	30.4664	34.3813	35.1449	39.7957	37.5117	38.6441	37.5514
	ENSMUSG00000020173.18	Cobl	-0.339351	6.15586	31.1344	1.07838e-05	9.58993e-05	67.4708	61.2841	64.7002	63.0165	64.1663	62.8305	81.0763	87.1018	87.8638	72.4297	75.9215
	ENSMUSG00000042390.10	Gatad2b	-0.339911	6.31874	69.0819	2.03532e-08	6.63438e-07	71.3509	69.2134	63.4979	65.7875	70.7769	76.7999	87.7863	87.9396	82.9812	88.0102	93.8258
	ENSMUSG00000033228.9	Scaf11	-0.3401	6.75802	88.7784	2.09453e-09	1.11702e-07	96.5716	95.7564	94.0069	88.4019	96.8602	95.1068	113.689	126.299	111.948	117.868	128.208
	ENSMUSG00000036528.17	Ppfibp2	-0.341288	5.64146	49.412	3.44201e-07	5.85041e-06	45.3398	45.9631	49.9717	45.944	45.6278	46.4371	60.8959	61.2196	55.1643	56.9237	60.7108
	ENSMUSG00000034751.18	Mast4	-0.341515	5.68624	49.4766	3.40597e-07	5.8166e-06	42.6812	43.6783	44.1103	44.1563	44.4781	52.178	55.933	56.9707	56.0328	57.1843	60.526
	ENSMUSG00000056050.16	Mia3	-0.342202	6.40183	72.3706	1.34796e-08	4.76145e-07	77.8177	70.4901	73.1165	72.2232	76.9564	73.1002	92.3946	99.5492	86.5023	90.5232	99.8731
	ENSMUSG00000037286.16	Stag1	-0.342477	5.49011	43.4999	9.40862e-07	1.31321e-05	39.5915	38.9073	39.8271	35.4859	41.4602	41.5255	45.2984	52.0037	51.3615	53.1635	48.5634
	ENSMUSG00000036606.18	Plxnb2	-0.343426	8.10496	88.0312	2.2658e-09	1.18659e-07	238.411	235.258	250.159	266.904	237.983	239.139	318.178	297.211	305.235	319.037	312.057
	ENSMUSG00000025047.10	Pdcd11	-0.343692	5.64512	56.5324	1.13979e-07	2.48771e-06	45.5553	40.1169	41.4051	40.4915	47.0649	42.9288	54.2619	51.3155	51.9953	55.6579	59.2056
	ENSMUSG00000036941.3	Elac1	-0.343801	4.97999	36.3377	3.62548e-06	3.95154e-05	27.3045	30.0373	24.798	24.6703	29.5323	28.7043	32.4862	34.7091	34.0845	35.2934	38.238
	ENSMUSG00000030255.14	Sspn	-0.343916	5.4293	39.6925	1.88967e-06	2.30608e-05	40.3819	38.8401	37.3473	37.1842	35.5681	33.6159	51.0462	48.1439	45.845	43.4839	47.2958
	ENSMUSG00000061589.15	Dot1l	-0.344184	6.21994	52.1907	2.20801e-07	4.18084e-06	62.2973	62.8968	61.0932	65.3406	67.9027	72.0158	86.7228	77.8261	84.4835	84.3617	80.8597
	ENSMUSG00000090115.8	Usp49	-0.344526	4.39696	54.6793	1.5045e-07	3.06507e-06	19.0413	18.0761	19.7632	19.2178	18.2511	17.8604	23.9026	23.5782	23.0751	23.1381	24.9815
	ENSMUSG00000024070.16	Prkd3	-0.344587	6.63845	46.0106	6.07283e-07	9.18508e-06	82.4164	88.2303	91.9028	81.8768	90.4651	98.4238	103.308	120.973	108.591	111.279	120.497
	ENSMUSG00000019368.14	Sec14l4	-0.344913	6.42399	41.2527	1.4127e-06	1.81817e-05	77.5303	72.1701	71.6136	80.2679	77.4594	80.9461	101.662	94.1333	95.0704	96.4613	99.477
	ENSMUSG00000020359.14	Phykpl	-0.345289	4.03388	31.7328	9.46195e-06	8.6391e-05	15.0175	13.6411	15.4048	12.6033	15.0895	13.0764	17.7244	17.5341	16.784	17.8887	19.9377
	ENSMUSG00000034557.15	Zfyve9	-0.345771	5.23633	51.5998	2.42316e-07	4.49548e-06	35.8551	34.0019	31.1853	33.6088	31.8317	34.9554	40.5888	43.3863	42.5352	41.9947	44.9191
	ENSMUSG00000053754.15	Chd8	-0.346366	6.67628	57.4111	1.0015e-07	2.25941e-06	96.1404	82.9217	92.2034	89.6533	86.7287	88.3454	111.031	117.023	106.573	107.351	125.911
	ENSMUSG00000033392.17	Clasp2	-0.34645	5.4873	37.2715	3.01283e-06	3.39411e-05	38.9448	42.6032	36.3704	36.4692	39.3045	46.182	46.1087	55.2353	48.2394	49.8874	55.1388
	ENSMUSG00000026447.18	Pik3c2b	-0.348014	4.71549	41.2817	1.40518e-06	1.81115e-05	23.6399	23.8551	21.1159	25.5642	23.7121	24.7495	31.7773	30.3106	30.2817	29.7649	29.1275
	ENSMUSG00000042207.18	Kdm5b	-0.348532	5.57087	37.6877	2.7769e-06	3.15893e-05	44.6931	40.5873	40.5034	37.9887	41.3165	44.3322	48.7167	56.9109	51.4788	50.2224	57.6475
	ENSMUSG00000025241.17	Fyco1	-0.348672	6.66147	39.3127	2.03063e-06	2.44222e-05	92.1166	91.3213	80.9316	91.5304	88.9562	89.6849	108.574	116.215	106.878	103.963	131.721
	ENSMUSG00000020263.15	Appl2	-0.348834	7.20664	43.9849	8.63429e-07	1.23219e-05	150.606	132.043	117.828	132.648	133.147	123.62	169.445	170.553	157.206	156.27	184.879
	ENSMUSG00000042446.17	Zmym4	-0.350351	5.12087	38.6437	2.30748e-06	2.7207e-05	31.6157	27.7525	28.7807	29.229	30.2508	34.0624	34.8157	39.5863	36.0328	39.1095	43.6516
	ENSMUSG00000037643.15	Prkci	-0.351349	6.92322	80.7013	5.04587e-09	2.20591e-07	110.655	105.231	101.672	102.882	109.291	118.708	137.794	146.765	134.859	130.545	139.696
	ENSMUSG00000026932.15	Nacc2	-0.351368	5.5766	62.3996	4.93326e-08	1.30747e-06	44.5494	40.3857	38.8502	41.296	44.5499	44.4597	57.7055	49.7895	53.5211	55.0064	54.1617
	ENSMUSG00000038648.6	Creb3l2	-0.352414	7.29486	55.8146	1.26818e-07	2.68396e-06	139.109	131.774	150.817	134.793	144.931	153.982	178.257	184.437	177.441	179.278	190.82
	ENSMUSG00000047888.11	Tnrc6b	-0.352888	6.13027	45.0578	7.15648e-07	1.05318e-05	66.5367	61.8889	52.0758	61.4076	64.813	64.17	77.101	78.3946	81.291	80.4713	77.5588
	ENSMUSG00000061755.11	Bod1l	-0.353713	5.66845	58.0826	9.08118e-08	2.07708e-06	43.256	43.6783	43.434	46.1227	46.49	47.2026	59.326	59.2148	52.5352	53.7592	62.9818
	ENSMUSG00000034248.8	Slc25a37	-0.356188	5.98455	62.039	5.18495e-08	1.35157e-06	57.7705	58.9994	51.2492	51.8434	57.6275	57.4086	70.3911	69.4181	70.3051	70.3449	77.0306
	ENSMUSG00000020315.19	Sptbn1	-0.35657	10.5203	59.2272	7.70023e-08	1.82949e-06	1250.26	1223.46	1241.25	1310.21	1306.53	1490.26	1649.33	1760.14	1563.94	1635.86	1736.79
	ENSMUSG00000021275.17	Tecpr2	-0.357179	4.47126	38.6242	2.31614e-06	2.72362e-05	20.8376	19.8232	18.7112	20.9161	20.1912	18.3069	25.2952	25.4334	24.4366	24.0129	27.5694
	ENSMUSG00000021709.15	Erbin	-0.357688	7.1332	36.2787	3.66849e-06	3.99465e-05	124.595	122.031	113.695	106.815	119.926	142.756	135.591	163.611	151.08	159.658	169.827
	ENSMUSG00000029765.13	Plxna4	-0.357923	5.62243	52.355	2.15191e-07	4.08348e-06	43.8308	38.3025	45.8387	39.7764	43.6158	41.5255	57.3257	56.7912	50.9859	51.5999	53.4752
	ENSMUSG00000028649.23	Macf1	-0.358263	9.78334	44.8497	7.42007e-07	1.08647e-05	770.704	748.916	832.461	734.746	776.678	909.67	1021.05	991.512	946.549	1058.13	1081.84
	ENSMUSG00000019699.17	Akt3	-0.359103	6.27359	56.1414	1.20788e-07	2.59731e-06	67.3989	70.4901	62.2955	66.3238	68.8368	77.1826	79.1013	95.6594	88.9201	91.1933	86.3261
	ENSMUSG00000034160.14	Ogt	-0.359173	7.86871	48.4375	4.03854e-07	6.61918e-06	213.262	218.459	190.343	192.178	209.6	238.756	257.814	275.757	279.225	278.42	258.714
	ENSMUSG00000032186.16	Tmod2	-0.359663	6.03188	49.9812	3.1384e-07	5.46758e-06	59.4231	58.7306	57.7117	54.078	57.5557	66.8491	70.619	78.3048	75.0469	76.3016	78.9584
	ENSMUSG00000032479.16	Map4	-0.359823	8.4235	108.721	3.06392e-10	2.79433e-08	305.594	290.024	321.322	301.139	310.412	322.317	390.721	402.775	394.155	393.607	398.04
	ENSMUSG00000025036.8	Sfxn2	-0.359862	4.96348	57.0977	1.04861e-07	2.35349e-06	27.8793	25.3334	24.0465	26.2792	27.6641	28.0026	33.9801	33.602	36.2441	33.9718	32.5076
	ENSMUSG00000034573.15	Ptpn13	-0.359953	6.1043	63.5523	4.21378e-08	1.14312e-06	64.4529	61.2169	61.0932	70.078	62.1544	57.2172	83.026	85.875	77.5352	74.2912	81.4143
	ENSMUSG00000066036.15	Ubr4	-0.360191	7.58887	88.9917	2.04828e-09	1.0957e-07	169.647	158.048	172.083	176.268	165.697	152.005	212.313	211.905	206.408	204.631	227.527
	ENSMUSG00000021470.20	Ercc6l2	-0.36053	4.91589	50.0356	3.11089e-07	5.42509e-06	28.1667	27.6182	29.3067	22.7932	26.1551	25.8976	32.0558	34.4398	34.8122	32.8735	37.1553
	ENSMUSG00000068747.15	Sort1	-0.360546	8.65673	70.4267	1.71666e-08	5.72405e-07	371.413	351.51	352.958	335.641	337.574	361.355	450.376	456.963	434.084	439.232	477.527
	ENSMUSG00000055296.15	Tmem245	-0.360864	6.96169	55.527	1.32396e-07	2.76804e-06	109.865	112.825	111.29	94.212	117.842	119.346	134.275	142.397	141.08	145.176	149.519
	ENSMUSG00000034612.8	Chst11	-0.360995	5.05113	48.6934	3.87174e-07	6.40332e-06	28.9571	30.3732	29.457	27.5306	31.7598	28.8956	35.8285	37.2225	37.676	38.4021	40.377
	ENSMUSG00000061414.9	Cracr2a	-0.361352	6.07394	33.1149	7.03451e-06	6.79639e-05	54.1778	56.5131	56.8851	53.9886	59.7113	65.3182	66.1879	75.8812	69.9295	76.9717	82.3385
	ENSMUSG00000038914.16	Dido1	-0.361382	6.32435	48.1054	4.26676e-07	6.89602e-06	66.6085	69.751	66.128	70.078	73.723	76.3534	85.9885	88.0593	85.7276	88.8665	103.966
	ENSMUSG00000029191.17	Rfc1	-0.362194	5.57287	82.9761	3.91232e-09	1.78605e-07	42.1064	43.208	40.0525	43.7987	43.4003	37.5707	52.8693	56.9109	52.8169	50.2224	55.0596
	ENSMUSG00000033542.14	Arhgef5	-0.36266	6.51216	42.3914	1.14768e-06	1.53603e-05	83.9971	69.6838	81.7582	83.0388	80.621	85.7301	100.7	105.264	99.3896	99.3652	114.767
	ENSMUSG00000007817.16	Zmiz1	-0.363005	7.80249	39.6627	1.90033e-06	2.31262e-05	185.598	193.461	198.76	189.854	201.912	230.91	262.878	244.579	258.192	268.647	252.508
	ENSMUSG00000062866.17	Phactr2	-0.363299	7.33869	45.4653	6.66929e-07	9.89836e-06	140.69	135.739	142.1	131.933	152.619	161.446	171.243	196.465	173.756	184.323	201.278
	ENSMUSG00000020019.5	Ntn4	-0.363551	7.31116	83.1576	3.83463e-09	1.7738e-07	143.42	142.19	155.25	133.988	133.65	135.739	176.13	181.474	186.009	171.143	190.477
	ENSMUSG00000007880.17	Arid1a	-0.363591	7.63815	91.7041	1.54746e-09	9.24185e-08	172.162	173.638	171.256	174.48	184.739	179.115	232.645	228.751	218.497	232.609	219.103
	ENSMUSG00000022237.18	Ankrd33b	-0.364096	6.58699	35.8565	3.99303e-06	4.27468e-05	83.7816	74.186	97.3884	92.2455	81.8426	90.6417	113.968	120.315	103.145	108.486	111.783
	ENSMUSG00000029009.18	Mthfr	-0.364304	5.99434	61.8335	5.33459e-08	1.38438e-06	50.0821	54.094	50.1971	57.0277	55.903	52.2418	71.6824	65.6779	63.2863	67.925	74.0994
	ENSMUSG00000043940.16	Wdfy3	-0.364348	6.43719	39.6543	1.90333e-06	2.31466e-05	70.9916	71.4309	69.8101	72.402	77.8187	87.7075	87.3558	95.4798	92.6056	103.516	104.151
	ENSMUSG00000022961.19	Son	-0.364442	8.68494	66.2649	2.93193e-08	8.69556e-07	359.772	343.513	339.807	328.58	358.699	395.417	418.295	460.553	442.042	464.232	495.721
	ENSMUSG00000031824.16	6430548M08Rik	-0.364531	6.67947	40.9339	1.49833e-06	1.91571e-05	87.2306	79.6962	91.6774	96.9829	87.4472	85.6663	119.108	118.28	106.103	108.468	115.057
	ENSMUSG00000037426.19	Depdc5	-0.365028	4.76916	40.886	1.51167e-06	1.92846e-05	25.077	21.7048	25.85	26.7262	24.4306	21.4325	30.1314	33.1232	29.3192	30.3792	32.6925
	ENSMUSG00000038708.11	Golga4	-0.365582	6.63704	75.7754	8.93047e-09	3.43826e-07	96.0686	82.0481	88.6716	89.7427	86.8005	88.0264	115.082	118.579	105.728	106.792	124.353
	ENSMUSG00000030172.16	Erc1	-0.365833	5.03082	42.1205	1.20543e-06	1.60347e-05	30.2505	28.1557	29.7576	26.3686	27.5922	30.1076	35.3475	38.6886	35.9859	35.8147	39.3207
	ENSMUSG00000034801.14	Sos2	-0.365863	5.55613	63.7838	4.08353e-08	1.11444e-06	41.2441	39.9153	39.1508	40.7596	39.8794	45.4803	50.8183	56.851	50.6103	50.8739	55.6934
	ENSMUSG00000026131.21	Dst	-0.365945	7.45531	75.164	9.60541e-09	3.6654e-07	163.396	150.993	158.557	140.96	155.134	154.62	198.867	198.47	190.516	189.088	215.221
	ENSMUSG00000090035.4	Galnt4	-0.366136	5.15376	35.1587	4.60004e-06	4.83254e-05	34.0587	34.2035	27.0523	28.0669	30.682	36.295	39.7532	38.539	42.1126	41.1385	43.2819
	ENSMUSG00000038042.12	Ptpdc1	-0.366336	4.07884	38.6254	2.31563e-06	2.72362e-05	16.9575	14.4475	14.5782	15.1061	14.1554	16.0106	18.1548	18.6112	19.2253	20.29	21.7598
	ENSMUSG00000054843.10	Atrnl1	-0.366375	6.10135	43.9532	8.68276e-07	1.23708e-05	56.7645	61.7545	57.1105	56.7596	59.7113	70.8677	75.3033	77.5568	75.0469	81.6998	80.622
	ENSMUSG00000020634.13	Ubxn2a	-0.366527	5.31069	35.4279	4.3547e-06	4.60884e-05	36.6455	38.5713	31.8616	30.2122	35.4244	37.0604	42.7157	45.2415	43.7793	44.3029	49.7517
	ENSMUSG00000068966.11	Zbtb34	-0.36725	4.81725	41.9312	1.24766e-06	1.65083e-05	25.077	22.5111	21.6419	25.4748	26.0833	27.6837	30.9164	31.5673	32.1831	34.2324	30.6855
	ENSMUSG00000022008.5	Gpalpp1	-0.367303	5.46126	50.9052	2.7057e-07	4.91508e-06	36.9329	39.7809	33.064	35.4859	40.9572	41.6531	45.7036	50.6273	47.23	49.3661	52.3396
	ENSMUSG00000031245.9	Hmgn5	-0.367512	4.6923	37.6297	2.80855e-06	3.19285e-05	20.7658	21.9064	25.0234	24.3128	22.275	22.4531	32.309	32.0161	28.9671	26.5259	27.1469
	ENSMUSG00000014329.15	Bicc1	-0.369332	5.83256	46.0045	6.07923e-07	9.1868e-06	51.2318	51.6748	50.4977	46.2121	43.1128	55.0484	61.225	62.2668	64.2488	63.1038	69.9798
	ENSMUSG00000040209.13	Zfp704	-0.369367	6.26641	42.7917	1.06779e-06	1.4523e-05	73.6502	66.6599	63.6482	69.7204	65.3878	73.4829	88.3686	88.6876	89.9765	85.1622	92.0037
	ENSMUSG00000029438.10	Bcl7a	-0.369861	5.35656	54.7845	1.4807e-07	3.02365e-06	39.1603	36.2194	34.8675	35.8435	36.5741	36.9328	50.8943	43.6556	47.0892	47.4302	47.4278
	ENSMUSG00000060012.10	Kif13b	-0.370551	6.25702	56.734	1.10632e-07	2.44836e-06	68.5486	66.1895	64.9256	70.2567	65.2441	71.6331	80.8231	85.875	81.9718	87.8427	101.774
	ENSMUSG00000047036.9	Zfp445	-0.370689	6.87995	67.7932	2.40178e-08	7.54679e-07	107.565	105.634	96.2613	93.2287	104.692	107.163	119.006	135.126	134.249	134.435	139.616
	ENSMUSG00000023809.11	Rps6ka2	-0.370689	5.46549	34.7967	4.95381e-06	5.13307e-05	41.1004	34.5395	38.6247	38.3462	41.8195	40.3773	48.3369	52.1833	49.8591	49.4964	53.1847
	ENSMUSG00000071369.12	Map3k5	-0.370738	5.70235	59.111	7.82945e-08	1.8476e-06	49.2199	44.4847	42.908	42.2792	45.9152	46.1182	57.9587	59.2448	57.3709	59.6228	57.8852
	ENSMUSG00000031355.17	Arhgap6	-0.371838	5.02076	64.4975	3.70872e-08	1.04654e-06	27.7356	27.8197	29.2316	26.458	26.227	31.3196	37.9302	35.7264	34.7652	35.9822	37.7891
	ENSMUSG00000096188.2	Cmtm4	-0.372409	6.42904	45.0455	7.17171e-07	1.05453e-05	76.7399	80.2338	76.1974	75.6199	77.8905	69.4006	86.7735	106.192	90.2816	95.9029	112.918
	ENSMUSG00000033295.15	Ptprf	-0.372411	8.68873	62.2718	5.02089e-08	1.32604e-06	348.276	349.897	385.796	354.68	370.986	397.841	481.343	470.098	477.018	495.281	457.668
	ENSMUSG00000038039.14	Gcc2	-0.372812	5.92169	43.5406	9.34082e-07	1.3074e-05	51.6629	54.9003	52.4515	51.8434	49.2205	54.5381	56.9459	77.9757	65.446	67.3665	71.9604
	ENSMUSG00000033499.15	Larp4b	-0.373729	6.59559	56.7676	1.10085e-07	2.44836e-06	87.8773	83.728	73.0413	81.1617	85.2916	84.6457	98.3449	114.869	104.366	103.032	114.873
	ENSMUSG00000104156.3	Gm38102	-0.373938	4.78766	42.9254	1.04247e-06	1.42362e-05	25.3644	24.4599	22.9193	25.4748	25.2929	25.196	33.2459	33.9311	33.1925	29.4112	30.8703
	ENSMUSG00000021068.18	Nin	-0.374448	5.74524	32.77	7.56916e-06	7.18947e-05	44.0464	46.299	45.6133	42.5473	49.2924	57.1534	56.7433	66.4858	59.2723	63.141	62.6386
	ENSMUSG00000041836.11	Ptpre	-0.376119	5.8766	50.7478	2.77458e-07	4.99447e-06	50.7288	50.5997	52.6769	50.1451	50.2983	57.9189	66.669	73.8764	68.3333	65.896	63.2987
	ENSMUSG00000031024.14	Denn2b	-0.376567	7.27961	70.8326	1.63146e-08	5.47136e-07	134.367	129.086	138.042	145.072	145.793	145.818	183.194	187.967	174.061	180.023	181.525
	ENSMUSG00000033943.16	Mga	-0.37693	5.85832	33.9657	5.88316e-06	5.8862e-05	54.0341	52.4812	43.9601	41.3853	53.0288	54.7295	57.275	68.5504	61.6901	66.138	71.1418
	ENSMUSG00000047669.9	Msl3l2	-0.37725	4.1175	44.3224	8.13645e-07	1.16879e-05	14.73	14.649	13.5262	15.4636	14.5147	16.4571	19.0157	21.3042	17.723	20.048	18.6701
	ENSMUSG00000027309.19	Dnaaf9	-0.37809	6.42284	64.5006	3.70717e-08	1.04654e-06	77.0992	72.0357	80.5559	75.5305	78.6091	76.162	101.206	110.441	98.2628	95.3816	92.9543
	ENSMUSG00000037876.18	Jmjd1c	-0.378233	6.07713	59.9466	6.95021e-08	1.67874e-06	59.0639	62.2248	52.1509	57.5641	59.9987	62.7029	70.2645	83.2718	73.0046	76.1341	80.7013
	ENSMUSG00000012350.16	Ehf	-0.378251	5.38661	33.4472	6.55799e-06	6.44165e-05	36.1425	37.765	36.671	31.2848	32.4783	39.4205	39.9811	43.6556	47.1126	53.0518	47.9296
	ENSMUSG00000036572.17	Upf3b	-0.378328	4.77541	49.9067	3.17642e-07	5.52279e-06	23.6399	24.9303	23.7459	22.6144	21.1971	23.091	27.65	33.0634	29.2253	30.9004	30.0517
	ENSMUSG00000022139.18	Mbnl2	-0.378643	7.44962	40.038	1.77064e-06	2.19337e-05	157.504	150.522	144.429	125.765	155.781	177.456	184.815	211.456	194.812	196.366	200.618
	ENSMUSG00000062901.4	Klhl24	-0.379477	6.99085	36.3433	3.62145e-06	3.95154e-05	115.182	112.018	94.3826	113.072	119.566	128.723	144.909	151.493	138.568	157.127	148.436
	ENSMUSG00000038495.15	Otud7b	-0.379535	7.21737	81.2041	4.76764e-09	2.10488e-07	133.504	126.734	124.14	128.178	127.039	139.375	163.191	176.926	169.084	163.921	171.517
	ENSMUSG00000054519.9	Zfp867	-0.379678	3.63677	52.7429	2.02559e-07	3.87752e-06	10.4907	10.8188	10.2198	11.3519	11.1375	10.9076	14.0276	15.2002	13.6854	13.1978	14.3129
	ENSMUSG00000041235.13	Chd7	-0.379835	4.84285	45.6567	6.45295e-07	9.65949e-06	27.017	23.7879	20.9656	21.8994	27.3767	24.7495	29.5997	31.7767	31.5493	30.9934	34.3825
	ENSMUSG00000021835.16	Bmp4	-0.380845	6.31874	89.616	1.9191e-09	1.05243e-07	68.6923	69.8182	71.5384	69.8992	66.4656	69.1454	93.4581	93.5948	93.1455	83.1518	87.62
	ENSMUSG00000020121.16	Srgap1	-0.381219	4.57419	35.9582	3.91215e-06	4.1984e-05	19.9754	19.7561	20.9656	20.4692	19.6163	23.8564	26.1055	30.52	26.7136	26.6376	25.4568
	ENSMUSG00000078485.5	Plekhn1	-0.381438	4.13038	60.7013	6.24783e-08	1.56136e-06	12.9337	15.321	14.0522	14.5698	14.5865	15.3089	18.0535	18.9105	18.5211	19.1917	19.5679
	ENSMUSG00000019943.11	Atp2b1	-0.381648	7.2153	37.8333	2.69915e-06	3.08703e-05	136.738	129.019	118.129	111.731	137.53	154.365	154.759	180.038	168.357	178.161	174.184
	ENSMUSG00000042439.14	Zfp532	-0.381757	5.32139	41.7346	1.29321e-06	1.69949e-05	35.4958	31.9188	33.4397	37.8993	36.9333	37.8896	45.9568	47.0068	45.1878	45.8107	47.8768
	ENSMUSG00000022537.19	Tmem44	-0.381888	6.32365	48.0142	4.33191e-07	6.96902e-06	71.4946	63.7032	75.1454	76.1562	72.5733	81.8391	91.002	97.5743	93.6854	96.089	100.401
	ENSMUSG00000028960.21	Ube4b	-0.382991	6.05313	80.0033	5.46182e-09	2.35182e-07	57.1957	62.0233	55.6076	57.2065	59.6394	59.2584	77.4808	75.7016	75.3051	76.041	76.9514
	ENSMUSG00000029759.10	Pon3	-0.383752	5.70244	39.5672	1.93495e-06	2.3482e-05	47.0643	48.2478	47.2665	37.8993	45.5559	42.3548	54.1353	60.8306	56.737	54.8389	65.649
	ENSMUSG00000026083.13	Eif5b	-0.384053	6.72343	81.7145	4.50216e-09	2.01316e-07	96.1404	93.7404	92.2034	86.5248	90.6088	86.1766	124.906	125.282	116.995	107.146	118.966
	ENSMUSG00000068036.17	Afdn	-0.384214	7.25912	71.3769	1.52434e-08	5.23288e-07	126.391	127.272	133.834	131.933	132.644	146.2	161.899	176.657	165.141	169.096	195.574
	ENSMUSG00000057637.14	Prdm2	-0.384329	6.73034	104.414	4.52107e-10	3.68425e-08	99.6613	91.6573	91.7525	95.9103	100.453	96.0636	126.02	134.887	121.127	119.934	124.089
	ENSMUSG00000004508.7	Gab2	-0.384955	5.98896	47.6564	4.59798e-07	7.34288e-06	52.1659	51.0701	59.7406	56.1339	54.897	57.281	68.2135	73.3079	70.0234	70.5869	78.351
	ENSMUSG00000031310.17	Zmym3	-0.385032	5.78332	66.3533	2.89803e-08	8.6539e-07	48.8606	47.1726	48.6191	49.9663	50.2265	47.394	62.5164	64.8102	62.0657	61.5215	67.075
	ENSMUSG00000040181.15	Fmo1	-0.385048	9.00479	69.2999	1.97957e-08	6.46475e-07	430.333	432.348	435.768	438.613	459.08	457.355	558.267	609.653	526.291	585.413	608.138
	ENSMUSG00000058325.7	Dock1	-0.38532	6.16965	71.9152	1.42588e-08	4.9487e-07	58.7046	61.8889	67.6309	60.5138	64.6693	65.5095	74.8475	86.5931	84.1549	80.341	86.643
	ENSMUSG00000032558.20	Nphp3	-0.385551	4.2813	32.2716	8.42145e-06	7.85455e-05	19.185	17.2025	16.9829	13.8547	17.6044	14.9262	20.8894	21.9625	21.6901	20.7554	23.4763
	ENSMUSG00000039457.5	Ppl	-0.386415	6.81969	38.6404	2.30898e-06	2.7207e-05	109.865	98.3771	85.5906	88.9382	98.1536	80.7547	125.944	123.307	126.15	117.235	119.256
	ENSMUSG00000040433.17	Zbtb38	-0.387963	5.56762	67.3378	2.54792e-08	7.86168e-07	43.9027	43.208	36.7461	37.5418	41.2446	41.7807	50.9196	54.4573	51.1971	52.4748	57.7796
	ENSMUSG00000042997.14	Nhlrc3	-0.388398	5.28306	63.5456	4.21762e-08	1.14312e-06	32.4061	34.0019	32.0871	31.3742	35.4962	35.4657	40.0571	45.1816	42.1361	43.5956	48.3257
	ENSMUSG00000083992.2	Gm11478	-0.389432	5.38113	36.0552	3.8366e-06	4.13258e-05	38.1544	38.7729	33.9657	35.3965	35.8555	28.7681	48.6661	46.5879	43.0281	45.0848	46.7941
	ENSMUSG00000048271.15	Rbm33	-0.389519	6.45281	50.689	2.80075e-07	5.00947e-06	74.8717	74.0516	73.1165	73.9215	79.5432	79.5427	91.711	95.5995	96.5023	96.6661	116.404
	ENSMUSG00000041215.17	Yeats2	-0.390039	5.29348	72.1437	1.38619e-08	4.86395e-07	33.9869	33.8003	33.8906	34.5027	36.6459	33.871	43.1715	44.1942	44.9061	45.0289	48.4049
	ENSMUSG00000041638.19	Gcn1	-0.39137	6.42874	76.0534	8.64076e-09	3.37105e-07	75.8777	74.522	81.7582	80.7148	72.7889	73.4829	102.852	98.0232	97.676	104.261	98.8168
	ENSMUSG00000006464.10	Bbs1	-0.391911	4.21186	31.8271	9.27021e-06	8.50556e-05	18.6101	17.8073	14.8036	13.4972	16.814	14.3521	21.5984	22.501	21.0328	18.9125	21.0468
	ENSMUSG00000028088.15	Fmo5	-0.391999	5.79555	41.184	1.43069e-06	1.83996e-05	49.7947	57.521	49.0699	49.7875	50.5857	42.0996	68.7706	70.0764	66.9483	64.6302	56.3536
	ENSMUSG00000051339.11	2900026A02Rik	-0.392453	6.64881	46.2023	5.87715e-07	8.93562e-06	87.2306	77.3443	84.9894	93.5863	88.3813	91.152	114.55	112.715	115.61	113.438	115.269
	ENSMUSG00000042744.17	Hectd4	-0.392473	6.037	143.801	1.9385e-11	4.02447e-09	59.7105	56.9162	55.307	57.6534	59.5676	59.5773	75.3539	75.2827	76.5727	77.0834	77.2155
	ENSMUSG00000032198.10	Dock6	-0.392947	7.56341	38.0252	2.60028e-06	2.99514e-05	154.845	144.811	164.418	170.815	175.469	187.024	223.631	205.502	205.375	230.282	226.523
	ENSMUSG00000051344.14	Plekhm3	-0.393179	5.22176	40.1685	1.72783e-06	2.15534e-05	31.6875	35.6147	29.983	31.0167	28.5263	34.1262	38.0821	40.9627	40.7042	42.4415	46.9789
	ENSMUSG00000026028.13	Trak2	-0.393879	6.52714	51.6144	2.41758e-07	4.48991e-06	78.8955	77.1427	74.3939	72.0445	88.3813	95.7447	100.092	109.393	103.779	110.311	109.644
	ENSMUSG00000052056.15	Zfp217	-0.394104	5.70479	81.507	4.60811e-09	2.05002e-07	46.4176	46.7694	40.5034	42.9049	47.7834	45.5441	57.984	60.4117	60.6103	61.5588	55.1652
	ENSMUSG00000053040.14	Aph1c	-0.394336	3.87297	52.8249	1.99992e-07	3.84103e-06	13.5085	14.3803	10.9712	12.1564	12.4309	12.4385	17.2939	16.7561	16.0329	16.7346	16.399
	ENSMUSG00000038178.17	Slc43a2	-0.394432	7.2703	65.3983	3.28809e-08	9.52509e-07	132.786	134.193	155.025	134.435	137.674	149.581	178.054	186.172	185.305	186.761	187.942
	ENSMUSG00000025608.10	Podxl	-0.394918	9.25281	43.6002	9.24248e-07	1.2967e-05	534.018	478.311	582.978	538.814	552.276	646.612	756.324	728.082	723.403	722.157	722.218
	ENSMUSG00000048264.17	Dip2c	-0.395096	5.34868	99.6392	7.06979e-10	5.15801e-08	34.2024	32.8596	34.642	32.268	36.5022	37.1242	43.4753	45.6604	46.5023	43.8934	48.1673
	ENSMUSG00000037172.15	Dennd11	-0.395238	4.69899	35.6565	4.15759e-06	4.4291e-05	24.9333	21.6376	19.1621	23.1508	24.1432	21.9428	27.7007	31.1484	28.169	27.9965	32.9565
	ENSMUSG00000036959.16	Bcorl1	-0.395926	4.67004	39.6702	1.89764e-06	2.31096e-05	22.9932	20.3608	20.9656	21.6312	23.6402	22.0704	30.6632	29.4429	29.2958	27.2333	27.7807
	ENSMUSG00000026768.11	Itga8	-0.395997	7.91464	50.3211	2.97102e-07	5.22821e-06	210.244	209.051	200.338	181.899	201.481	229.507	244.925	275.847	259.014	270.806	301.309
	ENSMUSG00000028053.14	Ash1l	-0.396977	6.35339	69.3284	1.97242e-08	6.45349e-07	72.285	65.7191	64.2493	67.9327	75.4475	74.8225	89.1789	94.1333	88.4272	87.247	102.593
	ENSMUSG00000018411.18	Mapt	-0.397304	7.73887	88.1589	2.23549e-09	1.17778e-07	183.227	187.145	201.465	189.497	198.535	218.918	275.968	242.096	258.85	260.885	256.073
	ENSMUSG00000042043.7	Tbca	-0.397501	4.88299	53.1983	1.88744e-07	3.67766e-06	25.077	26.6774	26.9772	22.1675	23.9276	24.2392	33.7776	34.2004	32.4178	29.4857	33.9864
	ENSMUSG00000040721.10	Zfhx2	-0.397513	4.31841	48.2311	4.17879e-07	6.80429e-06	16.3108	17.4713	16.9077	18.2346	18.323	17.7967	25.4218	22.531	22.3005	22.1515	22.8953
	ENSMUSG00000033632.17	AW554918	-0.397911	4.11775	54.8396	1.46841e-07	3.00586e-06	14.2989	14.4475	14.6534	14.5698	13.4368	16.4571	17.8257	19.9577	19.6948	19.3779	19.7
	ENSMUSG00000024420.10	Zfp521	-0.398278	4.25738	38.8213	2.23019e-06	2.64573e-05	16.0953	15.7914	14.5782	16.8938	17.5326	17.5415	21.801	19.8679	22.1596	21.593	22.684
	ENSMUSG00000009418.17	Nav1	-0.398996	6.54486	45.2588	6.9115e-07	1.0223e-05	74.1532	74.0516	84.0126	76.6925	88.3095	95.6171	105.384	104.217	108.028	110.888	113.235
	ENSMUSG00000025092.8	Hspa12a	-0.399287	4.98879	36.2558	3.68534e-06	4.00927e-05	25.3644	27.6854	30.4339	24.134	31.185	33.0418	40.8167	38.5091	34.4601	38.5324	36.8913
	ENSMUSG00000019947.11	Arid5b	-0.399876	6.79727	51.4526	2.48027e-07	4.58192e-06	96.859	95.4876	79.579	84.6478	93.5549	105.058	111.588	128.543	118.779	126.896	125.013
	ENSMUSG00000038453.18	Srcin1	-0.401225	4.71448	43.726	9.03861e-07	1.27734e-05	26.7296	23.5191	24.272	25.2066	23.6402	21.6877	33.1446	29.6523	34.3427	31.7939	30.5271
	ENSMUSG00000042548.15	Asxl1	-0.401664	6.62214	105.175	4.2168e-10	3.50175e-08	85.6498	83.392	85.29	85.0947	85.4353	88.9195	112.752	117.293	109.155	110.069	116.431
	ENSMUSG00000060301.7	2610008E11Rik	-0.401761	4.91878	36.2486	3.69069e-06	4.01259e-05	25.7955	29.0965	24.4974	24.0446	27.8796	32.3402	32.8914	37.8807	35.3051	39.7051	34.7258
	ENSMUSG00000069769.14	Msi2	-0.402167	6.55783	42.7456	1.07668e-06	1.45778e-05	85.5061	81.9809	70.6367	69.9886	85.8664	94.2138	107.283	108.735	97.3473	107.295	117.513
	ENSMUSG00000026623.17	Lpgat1	-0.402766	6.48904	59.4751	7.43229e-08	1.7755e-06	79.6859	77.3443	71.6136	71.0612	72.0703	87.8989	94.952	98.7114	98.7088	105.192	109.169
	ENSMUSG00000006471.19	ENSMUSG00000006471.19	-0.403249	5.27764	33.9589	5.89148e-06	5.89114e-05	34.5617	29.6341	36.2952	28.9608	31.4724	34.8916	44.0071	42.4288	45.7511	41.4735	42.3312
	ENSMUSG00000036197.17	Gxylt1	-0.403318	5.40373	52.703	2.03819e-07	3.89736e-06	37.6514	36.1522	32.538	35.4859	38.3704	39.4205	44.0071	47.6053	46.7605	51.8233	51.9699
	ENSMUSG00000031540.15	Kat6a	-0.404398	6.75072	123.712	8.68557e-11	1.17417e-08	93.1944	88.2975	88.6716	93.8544	93.0519	89.047	121.235	123.157	116.338	112.917	128.684
	ENSMUSG00000034269.13	Setd5	-0.40504	7.03072	112.176	2.26315e-10	2.2946e-08	111.086	110.54	107.458	107.441	113.962	119.856	137.718	152.451	141.502	145.399	162.829
	ENSMUSG00000056492.7	Adgrf5	-0.405154	10.5997	56.5534	1.13625e-07	2.48621e-06	1290.71	1292.81	1358.93	1283.93	1428.33	1557.11	1762.21	1891.31	1731.74	1741.96	1935.01
	ENSMUSG00000015968.19	Cacna1d	-0.405167	5.69932	51.1043	2.62123e-07	4.7966e-06	47.3517	43.2752	47.4167	41.9216	40.8135	47.1388	56.642	53.6195	56.5493	61.4098	67.5239
	ENSMUSG00000024998.18	Plce1	-0.405245	5.32503	46.287	5.79289e-07	8.83061e-06	36.0706	32.9939	38.0987	30.9273	33.5562	36.295	47.0709	49.9092	40.6807	42.2926	49.8573
	ENSMUSG00000001151.11	Pcnt	-0.405291	6.55561	93.0912	1.34421e-09	8.43228e-08	83.3505	81.2417	75.8217	78.9271	79.5432	79.2238	103.105	106.67	103.662	99.8306	114.503
	ENSMUSG00000039959.14	Hip1	-0.405443	7.32788	77.3326	7.43306e-09	3.01454e-07	134.654	135.604	153.372	147.932	135.159	154.62	182.764	195.687	185.188	194.021	193.012
	ENSMUSG00000066440.6	Zfyve26	-0.405547	5.0109	77.638	7.17271e-09	2.92254e-07	25.2926	27.4838	25.9252	27.7988	29.6042	27.9388	33.4231	38.0603	35.2347	36.8943	37.4986
	ENSMUSG00000039831.17	Arhgap29	-0.405956	7.7439	35.9845	3.89151e-06	4.17882e-05	182.581	173.974	176.667	171.888	199.325	228.04	221.479	256.009	254.601	264.98	253.67
	ENSMUSG00000025261.19	Huwe1	-0.406892	8.0566	192.451	9.76988e-13	5.16294e-10	233.741	230.554	239.413	230.167	236.33	228.04	310.252	316.122	298.638	298.431	321.458
	ENSMUSG00000022946.11	Dop1b	-0.407264	6.26342	132.113	4.53024e-11	7.31508e-09	64.3092	67.6006	64.4748	68.5584	68.6931	62.1926	86.8241	90.6624	85.2347	87.731	86.907
	ENSMUSG00000024431.16	Nr3c1	-0.407425	7.22869	69.7601	1.86726e-08	6.14398e-07	122.367	129.96	122.262	118.704	126.033	146.009	149.72	170.792	167.958	180.246	177.458
	ENSMUSG00000043987.19	Cep164	-0.409505	5.35373	74.335	1.06107e-08	3.92879e-07	35.9269	39.4449	36.8964	37.2736	36.7896	32.2764	48.3369	50.0289	48.169	45.2337	50.1742
	ENSMUSG00000028082.15	Sh3d19	-0.410642	6.72603	49.5705	3.35436e-07	5.76274e-06	92.3322	92.5309	84.3883	88.5807	90.537	114.881	117.538	126.479	127.23	126.487	126.571
	ENSMUSG00000033960.7	Jcad	-0.410671	8.20046	49.4364	3.42833e-07	5.83285e-06	240.423	243.12	241.367	237.943	274.916	294.315	327.065	351.309	327.465	340.314	351.325
	ENSMUSG00000045095.17	Magi1	-0.410781	5.70824	82.9877	3.9073e-09	1.78605e-07	46.4176	45.4927	45.8387	44.782	43.6158	45.8631	59.5032	64.8401	57.3004	60.3488	59.4432
	ENSMUSG00000027678.18	Ncoa3	-0.411178	6.52335	91.6155	1.56153e-09	9.29402e-08	75.3747	74.7908	74.2437	83.0388	82.5611	80.9461	103.789	98.083	98.3098	108.524	113.05
	ENSMUSG00000071856.11	Mcc	-0.41135	6.35413	41.1125	1.44967e-06	1.85616e-05	69.339	72.2373	66.8794	63.821	81.9863	81.2012	88.1661	106.222	100.047	92.4219	96.2553
	ENSMUSG00000043241.15	Upf2	-0.411436	5.30374	49.8407	3.21054e-07	5.571e-06	35.8551	33.4643	30.7345	30.8379	34.8496	36.5501	46.5898	48.6824	42.2065	42.7207	44.3646
	ENSMUSG00000039210.17	Gpatch2	-0.41158	4.48346	36.8451	3.27735e-06	3.64967e-05	18.8976	18.7481	16.3817	18.7709	20.263	22.1342	24.3583	26.5704	25.4225	25.5021	26.0114
	ENSMUSG00000032601.14	Prkar2a	-0.411584	6.53961	98.0803	8.21205e-10	5.7746e-08	84.3564	78.0834	82.8854	78.0333	80.2618	87.4524	110.372	113.672	110.892	105.061	104.521
	ENSMUSG00000062585.12	Cnr2	-0.412288	4.32674	31.6695	9.59295e-06	8.72673e-05	18.682	17.6057	15.7805	14.4804	17.6044	14.9262	22.7378	22.9499	22.6995	20.8671	20.7827
	ENSMUSG00000030096.9	Slc6a6	-0.412575	8.08903	54.082	1.6477e-07	3.28392e-06	245.956	206.632	223.032	223.82	233.025	246.219	320.786	302.687	305.446	321.904	278.467
	ENSMUSG00000021843.18	Ktn1	-0.41259	6.19824	58.3487	8.73767e-08	2.0129e-06	67.9019	61.8217	61.1684	57.4747	65.6034	67.8059	85.2036	94.3428	81.9248	78.312	84.1078
	ENSMUSG00000028634.18	Hivep3	-0.412657	5.61471	52.9073	1.9745e-07	3.80058e-06	44.262	39.1761	43.0583	38.7932	39.9512	46.8837	59.1234	50.8368	54.6948	55.3787	59.8394
	ENSMUSG00000040565.9	Btaf1	-0.412803	5.46472	43.1075	1.00903e-06	1.38774e-05	37.1484	39.6465	33.3646	31.6424	39.4483	39.4205	45.0199	52.662	47.7699	49.0125	50.808
	ENSMUSG00000057335.12	Cep170	-0.413362	5.11083	34.533	5.23017e-06	5.3906e-05	30.5379	28.8949	25.0234	25.4748	28.5982	34.3813	35.1196	40.9028	34.3192	39.612	42.384
	ENSMUSG00000054199.19	Gon4l	-0.413671	6.10991	115.22	1.74428e-10	1.92219e-08	56.4771	57.4538	64.2493	61.5864	60.2143	56.6431	74.417	81.9852	76.6197	79.5033	83.21
	ENSMUSG00000063077.16	Kif1b	-0.413979	7.01094	62.4762	4.88155e-08	1.29968e-06	122.295	110.137	102.047	100.826	103.112	128.34	140.757	150.446	142.582	151.095	155.804
	ENSMUSG00000025812.19	Pard3	-0.414082	5.84579	73.05	1.24019e-08	4.48705e-07	48.4295	49.1213	53.2781	43.62	53.6036	53.2624	65.9853	66.3362	67.1361	67.5155	67.8936
	ENSMUSG00000038587.11	Akap12	-0.41415	8.01309	65.6064	3.19849e-08	9.34312e-07	230.866	219.736	230.696	213.273	221.169	223.893	289.692	308.222	276.76	298.151	314.856
	ENSMUSG00000052557.12	Gan	-0.414357	5.36508	65.0257	3.45544e-08	9.92742e-07	37.4359	37.5634	31.8616	33.9664	34.4184	41.5893	49.527	47.0368	47.4178	46.1644	51.0193
	ENSMUSG00000031925.18	Maml2	-0.415207	5.52125	43.8369	8.86301e-07	1.25762e-05	36.9329	37.5634	33.4397	36.5585	38.3704	44.7787	46.4125	48.4431	49.6009	53.4986	55.2445
	ENSMUSG00000020589.18	Cyria	-0.415443	6.23349	76.4277	8.26665e-09	3.27641e-07	59.7105	69.6166	60.0412	60.0668	67.3279	71.2504	84.6212	86.9522	80.3051	88.215	91.5019
	ENSMUSG00000054889.11	Dsp	-0.416336	6.28392	82.7522	4.01055e-09	1.82135e-07	71.4946	69.5494	62.4458	69.8992	62.8729	70.166	97.9904	91.3506	84.6948	87.4518	90.5777
	ENSMUSG00000019820.12	Utrn	-0.416477	7.60244	71.8982	1.42888e-08	4.9487e-07	165.767	161.005	153.146	159.195	167.925	193.467	211.072	236.68	209.648	220.044	235.66
	ENSMUSG00000041895.16	Wipi1	-0.416978	5.12353	48.6237	3.91638e-07	6.44927e-06	29.3164	30.2389	28.6304	28.6926	30.8257	31.2558	39.9052	39.8556	37.3474	39.0722	43.097
	ENSMUSG00000021140.10	Pcnx	-0.417093	6.98751	53.8219	1.71464e-07	3.39404e-06	106.919	98.0411	107.308	114.681	109.65	122.472	136.528	155.293	135.023	147.689	158.841
	ENSMUSG00000040661.7	Rad54l2	-0.41739	5.41176	64.43	3.74249e-08	1.0509e-06	33.6995	39.3105	34.642	36.4692	37.9393	35.083	45.0452	50.9266	44.061	48.1934	53.528
	ENSMUSG00000062157.7	Ifnlr1	-0.418263	4.77127	31.8945	9.13576e-06	8.40731e-05	22.131	24.3255	23.0696	23.4189	23.5684	25.9614	33.4484	32.3153	32.4882	31.0307	29.4972
	ENSMUSG00000032875.9	Arhgef17	-0.4184	7.46563	42.1778	1.19296e-06	1.58931e-05	145.72	142.66	153.372	153.027	162.751	172.226	209.781	196.316	204.249	221.496	203.655
	ENSMUSG00000042359.19	Osbpl6	-0.418476	6.29065	49.9151	3.1721e-07	5.52078e-06	81.1948	73.1108	67.2551	67.0389	64.9567	62.8943	89.027	103.708	89.8356	86.4838	94.9349
	ENSMUSG00000034485.11	Uaca	-0.419774	6.10092	54.342	1.58362e-07	3.189e-06	54.0341	55.0347	61.7695	61.1395	57.7712	65.8923	74.7209	77.108	81.0093	75.5012	88.1482
	ENSMUSG00000038225.16	Primpol	-0.42025	3.6128	41.7131	1.29829e-06	1.7036e-05	9.84398	12.3643	10.5204	9.83237	10.4908	11.0352	12.6349	14.5718	14.8826	14.6311	14.8674
	ENSMUSG00000061665.8	Cd2ap	-0.420616	6.55756	34.4296	5.34298e-06	5.47453e-05	81.123	79.7634	69.7349	68.7372	83.3515	96.8291	93.534	112.266	104.507	109.845	115.321
	ENSMUSG00000095115.3	Itpripl2	-0.421096	7.66005	49.5365	3.37294e-07	5.78375e-06	174.82	171.555	161.412	154.368	182.367	207.883	222.466	245.776	239.671	248.003	218.76
	ENSMUSG00000042331.14	Specc1	-0.42112	6.07217	113.27	2.05953e-10	2.15906e-08	56.4771	56.849	59.1394	57.0277	57.5557	62.0012	74.5183	81.2371	77.3004	76.8042	79.7506
	ENSMUSG00000021179.9	Nrde2	-0.421859	4.55966	47.4595	4.75193e-07	7.52532e-06	18.682	19.8904	20.0638	19.3966	17.9637	22.3893	26.7132	24.8948	24.9765	26.8424	28.837
	ENSMUSG00000020546.15	Stxbp4	-0.422495	3.86323	31.462	1.00369e-05	9.05034e-05	13.7241	13.5739	13.1504	10.4581	13.5087	13.8418	16.4583	17.9829	16.6901	16.7718	19.7792
	ENSMUSG00000043090.19	Zfp866	-0.422827	4.92743	33.6303	6.3105e-06	6.23506e-05	29.1727	25.199	22.0927	30.391	29.8916	24.303	32.3343	37.8508	35.2582	34.4744	39.8225
	ENSMUSG00000027536.7	Chmp4c	-0.423017	4.65653	65.9322	3.06347e-08	9.0243e-07	23.6399	20.6968	19.3124	21.4524	20.0475	22.2618	27.9792	29.8618	26.5728	27.2519	30.7911
	ENSMUSG00000040407.19	Akap9	-0.423223	6.01374	52.5877	2.07513e-07	3.95499e-06	64.1655	57.0506	54.1047	49.7875	54.6815	55.7501	74.569	83.8104	70.7276	67.2362	79.0376
	ENSMUSG00000040272.15	Accs	-0.42336	3.86528	41.5137	1.34656e-06	1.75768e-05	12.7181	11.9611	12.5493	13.3184	10.8501	13.1402	15.9013	16.5466	15.6807	16.8835	18.2476
	ENSMUSG00000000823.17	Zfp512b	-0.423824	6.06817	78.2559	6.67566e-09	2.75869e-07	54.4652	51.6076	56.8099	56.4914	61.2202	64.9992	74.0625	76.5993	76.8779	78.554	80.358
	ENSMUSG00000040061.18	Plcb2	-0.424371	4.99693	53.9012	1.69392e-07	3.36066e-06	24.7177	28.4245	24.3471	27.4412	30.1071	26.982	35.626	36.5343	33.0751	38.551	37.4194
	ENSMUSG00000036501.8	Fam13b	-0.424635	4.97566	32.0606	8.81336e-06	8.15797e-05	27.5919	24.5943	24.5725	26.9049	28.4545	28.8319	38.0821	38.18	35.0469	35.8891	32.9037
	ENSMUSG00000041530.18	Ago1	-0.42494	7.02037	98.3319	8.01491e-10	5.65879e-08	111.373	108.86	111.29	110.391	114.68	117.815	140.326	155.233	149.437	149.774	159.844
	ENSMUSG00000020883.19	Fbxl20	-0.425026	6.16889	56.754	1.10305e-07	2.44836e-06	59.3513	63.972	61.0932	58.011	60.4298	63.4046	76.8478	81.2671	74.8826	86.2977	90.6569
	ENSMUSG00000032097.11	Ddx6	-0.42643	7.72015	45.452	6.68458e-07	9.91262e-06	187.826	185.062	145.707	161.608	184.236	210.817	226.391	240.51	242.183	252.359	243.187
	ENSMUSG00000024943.10	Smc5	-0.426467	4.73939	47.177	4.98269e-07	7.82821e-06	22.4903	23.0487	21.6419	21.4524	22.6342	25.0046	26.3333	32.5248	29.9765	31.7753	32.1907
	ENSMUSG00000052512.18	Nav2	-0.426572	6.8093	76.1628	8.52954e-09	3.35666e-07	103.541	98.7131	95.7352	93.765	95.9979	103.654	136.68	145.688	124.812	130.787	124.67
	ENSMUSG00000027692.17	Tnik	-0.427011	4.74971	38.0715	2.57703e-06	2.97032e-05	22.9214	20.6968	23.4454	21.0949	22.9217	25.7063	25.5737	33.4823	28.662	31.1982	34.541
	ENSMUSG00000053477.19	Tcf4	-0.427166	7.15646	46.6938	5.40608e-07	8.37271e-06	111.805	121.09	111.215	108.514	125.387	149.645	148.125	164.718	160.258	168.63	174.078
	ENSMUSG00000018417.15	Myo1b	-0.427401	8.10558	91.3059	1.61181e-09	9.43298e-08	232.806	233.377	239.338	212.915	227.42	266.439	300.301	338.234	303.685	318.87	321.986
	ENSMUSG00000058192.17	Zfp846	-0.427585	3.57539	33.0192	7.17859e-06	6.91261e-05	10.5625	8.73567	10.5955	11.1731	9.70039	11.8644	13.3946	14.4821	14.061	12.5463	15.7389
	ENSMUSG00000040648.16	Ppip5k2	-0.428809	4.48959	54.1042	1.64213e-07	3.28055e-06	20.4783	19.6889	17.2834	18.8603	17.3888	21.6239	25.5991	26.0318	25.7512	26.6562	25.4568
	ENSMUSG00000006307.17	Kmt2b	-0.428888	6.73024	133.633	4.04235e-11	6.97966e-09	93.4819	86.2815	91.0762	93.3181	85.076	95.4258	124.147	119.656	118.615	123.806	124.749
	ENSMUSG00000032841.16	Prr5l	-0.429262	5.24414	40.2223	1.71051e-06	2.14293e-05	26.9452	29.7013	32.0119	31.6424	31.9035	39.2292	42.3106	44.1942	42.9812	45.4943	39.9809
	ENSMUSG00000032702.17	Kank1	-0.429812	5.3817	115.046	1.77008e-10	1.92928e-08	39.6633	35.8162	38.775	36.2904	37.0052	35.7847	53.8568	49.999	47.8873	48.1003	50.8872
	ENSMUSG00000020697.17	Lig3	-0.429948	4.8179	46.091	5.98989e-07	9.07539e-06	22.5621	22.3768	23.7459	24.2234	25.0773	26.7269	29.625	32.4649	30.5164	32.7991	37.1289
	ENSMUSG00000054728.18	Phactr1	-0.430158	7.4339	74.7072	1.01458e-08	3.83803e-07	143.923	142.324	154.424	140.871	149.889	151.559	206.033	209.72	178.404	185.868	211.603
	ENSMUSG00000044921.6	Rassf9	-0.430512	4.96149	56.1841	1.20023e-07	2.58405e-06	26.1548	29.1637	24.0465	25.4748	29.9634	31.1282	37.0946	37.5815	37.4178	37.1921	37.3666
	ENSMUSG00000061859.18	Patj	-0.430558	5.98538	109.424	2.87897e-10	2.69497e-08	52.597	55.3707	55.833	51.1283	57.3401	54.0916	71.5811	76.5993	72.4647	70.8289	75.2613
	ENSMUSG00000079487.12	Med12	-0.431706	6.42505	172.757	2.99033e-12	1.21275e-09	73.9376	72.1029	75.0703	76.4243	70.9925	68.3162	98.3196	100.477	93.4976	98.1738	100.401
	ENSMUSG00000096910.3	Zfp955b	-0.431875	3.92485	32.9538	7.27897e-06	6.97845e-05	13.3648	12.0283	10.5955	12.4245	13.6524	15.0538	16.0532	19.2396	16.1502	17.7584	17.6666
	ENSMUSG00000029004.16	Kmt2e	-0.432743	7.28142	90.4077	1.76787e-09	9.88135e-08	140.331	128.75	116.926	142.033	140.763	138.036	183.447	182.522	176.807	179.129	185.618
	ENSMUSG00000033577.19	Myo6	-0.433341	6.61526	48.9529	3.71012e-07	6.19147e-06	85.1468	82.3841	77.7755	78.659	83.6389	102.442	99.6363	115.288	110.469	124.737	124.168
	ENSMUSG00000032462.15	Pik3cb	-0.434518	5.67187	57.6822	9.626e-08	2.18294e-06	43.4716	42.536	38.8502	43.0837	47.7116	49.8817	59.1994	60.4117	59.9295	59.3436	60.3939
	ENSMUSG00000031583.14	Wrn	-0.434748	4.39233	53.6612	1.75745e-07	3.45137e-06	18.682	18.0089	15.48	14.8379	17.4607	20.2206	22.3074	24.6554	23.7793	22.8216	24.7174
	ENSMUSG00000052942.14	Glis3	-0.43513	4.20978	54.839	1.46854e-07	3.00586e-06	16.6701	18.2105	15.5551	14.7486	15.808	14.4159	19.1423	23.4585	21.8544	22.3004	20.8355
	ENSMUSG00000042589.19	Cux2	-0.435161	3.41459	34.1232	5.69332e-06	5.74903e-05	10.6344	10.0124	8.19085	8.31282	8.47886	8.80264	11.9006	12.2379	13.3568	12.5277	11.3816
	ENSMUSG00000018474.19	Chd3	-0.435307	7.62622	56.6838	1.11455e-07	2.45413e-06	175.539	172.966	176.592	170.458	176.403	192.446	251.762	231.174	224.577	233.596	258.476
	ENSMUSG00000027130.16	Slc12a6	-0.436123	6.69677	91.3596	1.60295e-09	9.43298e-08	90.464	93.1357	79.8796	87.2399	92.4052	95.7447	114.499	122.469	121.62	127.138	122.003
	ENSMUSG00000040430.19	Pitpnc1	-0.436736	7.3308	60.181	6.72331e-08	1.65138e-06	139.971	127.675	128.123	126.569	144.5	161.637	178.003	207.776	176.502	179.594	193.039
	ENSMUSG00000038692.9	Hoxb4	-0.436967	4.35411	50.8464	2.73118e-07	4.94077e-06	17.4605	18.1433	17.2083	16.5363	19.2571	16.4571	23.143	22.4113	23.8497	25.4277	23.6875
	ENSMUSG00000056493.10	Foxk1	-0.437137	6.63301	121.147	1.06743e-10	1.37179e-08	82.5601	84.2656	79.9547	88.4913	94.0579	82.4132	121.209	119.567	115.023	115.765	105.736
	ENSMUSG00000070565.12	Rasal2	-0.437363	5.69678	54.6175	1.51868e-07	3.09034e-06	46.1302	38.9745	41.7057	44.2457	44.3344	51.0298	55.1228	63.8527	57.277	62.1544	62.3745
	ENSMUSG00000027200.18	Sema6d	-0.437648	6.57267	34.3095	5.47747e-06	5.58911e-05	67.3271	74.7236	76.0471	75.6199	81.0522	97.148	97.2308	114.689	100.728	105.396	114.978
	ENSMUSG00000020170.5	Frs2	-0.438703	5.66181	71.9759	1.41521e-08	4.92613e-07	44.0464	42.4688	36.8964	40.7596	45.1966	47.4577	53.5276	59.4542	55.9624	60.628	60.7636
	ENSMUSG00000043279.10	Trim56	-0.438709	7.10503	68.5486	2.17903e-08	7.00518e-07	101.673	111.817	105.73	98.86	115.327	111.181	136.174	142.217	135.563	146.144	168.216
	ENSMUSG00000038342.16	Mlxip	-0.439889	6.77103	82.9245	3.93474e-09	1.79159e-07	99.5176	92.3293	81.6079	89.2958	93.483	78.1394	122.602	118.879	114.953	124.644	122.9
	ENSMUSG00000097119.3	B230354K17Rik	-0.440091	3.72154	37.0941	3.11996e-06	3.50122e-05	13.3648	9.87803	10.5955	11.1731	12.359	11.6731	15.1417	15.6191	14.8591	15.3385	17.1385
[truncated: 487 more rows]

## Sheet: d IPA Canonical 6dpi
	Ingenuity Canonical Pathways	-log(p-value)	Ratio	z-score	Molecules
[truncated: 244 more rows]

[truncated: 2 more sheets: e IPA D&F 6dpi, f IPA USRs 6dpi]
