# Supplementary material for: Microplastics dysregulate innate immunity in the SARS-CoV-2 infected lung
Source: Front Immunol. 2024 May 13;15:1382655. doi: 10.3389/fimmu.2024.1382655 (PMC11128561; doi:10.3389/fimmu.2024.1382655)
Supplement: Supplementary file 3 [file Table_2.xlsx]

## Sheet: a All genes CRS
From Budhraja et al 2022; Cytokine Release Syndrome (CRS). NCBI SRA, BioProject: PRJNA1036279	geneID	logFC	logCPM	F	PValue	FDR
	TSPAN6	-0.817	3.94	5.043	0.03	0.113
	DPM1	-0.203	4.484	0.825	0.369	0.569
	SCYL3	0.13	3.773	0.377	0.542	0.72
	C1orf112	0.681	2.166	3.645	0.063	0.183
	FGR	0.941	5.565	2.815	0.101	0.25
	CFH	0.29	9.278	0.642	0.428	0.624
	FUCA2	0.221	4.709	0.453	0.504	0.689
	GCLC	0.018	5.722	0.004	0.953	0.975
	NFYA	0.43	4.479	3.208	0.081	0.216
	STPG1	-0.242	1.725	0.746	0.393	0.591
	NIPAL3	-0.396	4.311	2.418	0.128	0.291
	LAS1L	0.059	4.602	0.117	0.734	0.852
	ENPP4	-0.405	4.5	0.816	0.372	0.571
	SEMA3F	0.985	3.98	5.358	0.026	0.102
	CFTR	-0.87	3.663	2.415	0.128	0.292
	ANKIB1	0.164	5.147	1.069	0.307	0.507
	CYP51A1	-0.72	7.006	2.2	0.146	0.318
	KRIT1	0.757	5.77	10.123	0.003	0.023
	RAD52	0.324	3.232	0.783	0.381	0.581
	BAD	-1.341	3.177	9.717	0.003	0.026
	LAP3	0.581	6.806	3.698	0.061	0.179
	CD99	-0.194	5.329	0.736	0.396	0.594
	HS3ST1	-0.222	1.132	0.302	0.585	0.751
	AOC1	-0.599	-0.029	0.644	0.427	0.623
	HECW1	0.134	-0.177	0.045	0.833	0.911
	MAD1L1	-0.659	4.048	2.651	0.111	0.267
	LASP1	0.253	6.692	1.15	0.29	0.489
	SNX11	0.375	3.239	1.918	0.173	0.357
	TMEM176A	0.771	6.416	4.334	0.044	0.143
	M6PR	-0.151	5.791	0.563	0.457	0.651
	KLHL13	-0.536	0.571	1.38	0.247	0.444
	CYP26B1	1.52	2.073	5.987	0.019	0.082
	ICA1	0.626	3.808	2.449	0.125	0.288
	DBNDD1	0.134	1.746	0.118	0.733	0.852
	ALS2	0.474	5.897	5.665	0.022	0.092
	CASP10	0.315	4.912	2.084	0.156	0.333
	CFLAR	0.113	8.787	0.224	0.638	0.79
	TFPI	0.473	8.068	2.124	0.152	0.328
	NDUFAF7	0.714	3.44	9.62	0.003	0.027
	RBM5	0.584	6.952	15.073	0	0.006
	MTMR7	0.547	2.822	1.732	0.195	0.384
	SLC7A2	-0.727	8.679	2.226	0.143	0.315
	ARF5	-0.725	4.614	6.352	0.016	0.073
	SARM1	0.069	3.81	0.038	0.845	0.919
	POLDIP2	0.242	5.751	0.814	0.372	0.572
	PLXND1	0.301	6.52	0.537	0.468	0.66
	AK2	0.357	6.794	4.385	0.042	0.141
	CD38	1.154	4.295	9.997	0.003	0.024
	FKBP4	-0.337	6.536	0.211	0.649	0.797
	KDM1A	0.104	5.848	0.416	0.522	0.704
	RBM6	1.126	6.901	16.806	0	0.004
	CAMKK1	-0.268	2.302	0.279	0.6	0.763
	RECQL	-0.528	4.376	2.706	0.107	0.261
	VPS50	-0.128	3.667	0.217	0.644	0.793
	HSPB6	0.002	2.565	0	0.997	0.999
	ARHGAP33	0.107	1.466	0.044	0.835	0.912
	NDUFAB1	-0.545	3.55	2.693	0.108	0.262
	PDK4	-0.913	7.56	1.613	0.211	0.404
	ZMYND10	-3.393	1.707	18.716	0	0.002
	SLC25A13	0.619	5.025	5.243	0.027	0.105
	ST7	-0.341	4.002	1.896	0.176	0.359
	CDC27	0.549	5.738	2.61	0.114	0.271
	SLC4A1	-1.656	1.797	4.882	0.033	0.119
	HCCS	0.169	2.513	0.265	0.61	0.77
	DVL2	0.241	3.674	0.574	0.453	0.647
	PRSS22	-0.085	2.014	0.01	0.921	0.958
	UPF1	-0.284	5.986	0.628	0.433	0.628
	SKAP2	-0.246	4.545	0.649	0.425	0.621
	SLC25A5	-0.468	5.768	1.569	0.217	0.411
	MCUB	0.27	2.285	0.765	0.387	0.586
	POLR2J	-0.356	2.739	1.046	0.312	0.512
	DHX33	0.378	3.827	3.311	0.076	0.208
	MEOX1	-1.724	-0.349	7.804	0.008	0.046
	THSD7A	-0.694	3.487	6.23	0.017	0.076
	LIG3	0.089	4.828	0.28	0.6	0.763
	RPAP3	-0.112	3.33	0.122	0.729	0.849
	ACSM3	-0.062	3.252	0.025	0.875	0.936
	REXO5	0.413	1.137	1.088	0.303	0.503
	CIAPIN1	0.329	3.887	1.68	0.202	0.392
	SPPL2B	-0.144	4.208	0.111	0.741	0.856
	ATOSB	0.618	3.995	3.441	0.071	0.197
	COPZ2	0.17	2.129	0.28	0.599	0.762
	PRKAR2B	-0.596	2.854	4.011	0.052	0.161
	MSL3	1.124	4.527	32.487	0	0
	CREBBP	0.417	6.733	3.244	0.079	0.213
	TSPOAP1	-1.36	3.504	7.29	0.01	0.054
	MPO	1.008	2.025	1.363	0.25	0.448
	PON1	-0.099	5.119	0.031	0.862	0.928
	GCFC2	-0.081	3.673	0.09	0.766	0.871
	WDR54	0.04	1.814	0.011	0.917	0.956
	CROT	-0.277	2.78	0.687	0.412	0.609
	ABCB4	1.397	6.499	4.709	0.036	0.126
	KMT2E	0.388	6.92	2.642	0.112	0.268
	RHBDD2	-0.627	4.908	2.27	0.139	0.309
	IBTK	0.244	6.433	0.437	0.512	0.696
	ZNF195	1.432	4.373	18.869	0	0.002
	MYCBP2	0.729	7.56	15.253	0	0.005
	FBXL3	-0.544	5.117	2.635	0.112	0.268
	ITGAL	0.025	4.876	0.003	0.957	0.977
	PDK2	-0.064	3.891	0.052	0.821	0.905
	ITGA3	-0.726	6.8	1.425	0.239	0.437
	ZFX	-0.181	5.428	0.707	0.405	0.603
	LAMP2	-0.256	6.787	0.549	0.463	0.655
	ITGA2B	-0.129	1.324	0.049	0.825	0.907
	ASB4	-0.242	-0.434	0.108	0.744	0.858
	GDE1	0.49	5.335	2.765	0.104	0.255
	REX1BD	-1.3	3.185	7.815	0.008	0.046
	CRLF1	0.83	1.549	2.975	0.092	0.236
	OSBPL7	0.422	2.774	0.683	0.413	0.61
	TMEM98	-0.663	3.114	2.03	0.162	0.341
	YBX2	-0.274	0.353	0.223	0.64	0.79
	MAP3K14	-0.937	3.938	10.003	0.003	0.024
	ABCC8	0.999	2.995	1.172	0.285	0.485
	TMEM132A	0.807	3.143	1.883	0.177	0.361
	AP2B1	-0.036	6.543	0.035	0.852	0.923
	ZNF263	-0.825	4.259	9.674	0.003	0.026
	CX3CL1	-0.391	5.141	0.303	0.585	0.751
	SPATA20	0.448	4.826	1.779	0.19	0.376
	CACNA1G	-0.555	-0.191	0.743	0.394	0.593
	TNFRSF12A	-1.296	4.66	3.602	0.065	0.186
	MAP3K9	-0.262	4.163	0.792	0.378	0.578
	RALA	-0.722	4.172	10.737	0.002	0.019
	BAIAP2L1	0.46	5.077	4.799	0.034	0.123
	KDM7A	0.581	5.756	6.198	0.017	0.077
	ETV1	-0.28	4.507	0.487	0.489	0.676
	AGK	0.766	4.387	18.958	0	0.002
	ALDH3B1	-1.213	4.658	4.282	0.045	0.146
	TTC22	-0.524	3.069	1.726	0.196	0.385
	PHTF2	0.204	3.881	0.47	0.497	0.683
	FARP2	0.198	5.028	1.287	0.263	0.461
	GGCT	0.113	3.049	0.149	0.701	0.832
	DBF4	1.109	2.553	6.422	0.015	0.071
	TBXA2R	-0.749	0.641	2.896	0.096	0.243
	IFRD1	-0.905	5.367	8.499	0.006	0.037
	COX10	0.682	3.549	7.692	0.008	0.048
	GTF2IRD1	0.033	3.553	0.006	0.937	0.967
	PAF1	-0.931	4.737	10.116	0.003	0.023
	VPS41	-0.733	5.354	15.444	0	0.005
	ARHGAP44	-0.767	4.074	2.566	0.117	0.275
	ELAC2	0.344	5.135	2.518	0.12	0.28
	SCIN	-0.216	2.592	0.11	0.742	0.856
	ARSD	-0.9	5.54	6.501	0.015	0.069
	PNPLA4	0.089	2.345	0.068	0.796	0.89
	ADIPOR2	0.007	7.041	0.001	0.982	0.99
	UPP2	-0.397	0.656	0.209	0.65	0.797
	MARK4	0.002	4.09	0	0.994	0.997
	PROM1	-0.292	2.088	0.202	0.656	0.8
	CCDC124	-1.342	3.025	13.781	0.001	0.008
	CEACAM21	-0.441	0.16	0.948	0.336	0.536
	PAFAH1B1	-0.023	6.663	0.021	0.884	0.94
	NOS2	-0.548	1.267	0.333	0.567	0.738
	DNAH9	-2.68	2.572	9.45	0.004	0.028
	BLTP2	0.236	7.042	0.832	0.367	0.567
	GAS7	0.783	5.625	3.551	0.066	0.19
	TRAPPC6A	-2.249	1.758	19.628	0	0.002
	MATK	-1.943	1.182	13.172	0.001	0.01
	CD79B	0.941	0.623	1.886	0.177	0.36
	SCN4A	-0.489	0.116	0.738	0.395	0.594
	ST7L	0.679	3.292	12.617	0.001	0.011
	PAX6	-1.248	-0.017	2.164	0.149	0.323
	RPUSD1	-0.56	2.47	1	0.323	0.523
	RHBDF1	0.036	3.739	0.006	0.938	0.967
	LUC7L	0.37	5.331	4.551	0.039	0.133
	CACNA2D2	-1.116	5.773	1.844	0.182	0.367
	BAIAP3	-1.879	2.146	9.37	0.004	0.029
	TSR3	-1.453	3.221	17.297	0	0.003
	PIGQ	-0.735	3.991	2.407	0.128	0.293
	CRAMP1	-0.166	4.661	0.274	0.603	0.765
	TEAD3	-0.457	4.037	1.329	0.256	0.454
	SELE	-1.117	5.145	1.009	0.321	0.521
	DNAJC11	0.197	5.404	0.698	0.408	0.605
	FMO3	-0.327	5.442	0.612	0.438	0.633
	MYLIP	-0.774	3.81	4.983	0.031	0.115
	E2F2	1.344	1.841	6.15	0.017	0.078
	PSMB1	-0.316	5.284	1.195	0.281	0.48
	SYN1	1.72	0.382	9.796	0.003	0.025
	JARID2	0.446	4.856	4.255	0.045	0.147
	CDKL5	-0.296	4.821	1.391	0.245	0.442
	CAMK1G	-0.914	0.038	2.85	0.099	0.247
	CDK11A	0.089	4.288	0.076	0.785	0.883
	NADK	0.104	5.999	0.092	0.764	0.87
	DLEC1	-1.265	2.464	4.27	0.045	0.147
	CYTH3	-0.458	4.057	2.949	0.093	0.238
	ADAM22	-0.684	1.9	3.151	0.083	0.221
	SYPL1	-0.125	4.643	0.115	0.736	0.854
	CYB561	-0.82	4.21	7.335	0.01	0.053
	SPAG9	-0.239	7.324	1.177	0.284	0.483
	CELSR3	-0.63	2.252	1.104	0.299	0.499
	AASS	0.463	7.26	1.372	0.248	0.446
	PLEKHG6	-2.638	2.225	21.171	0	0.001
	SS18L2	-1.116	1.396	10.816	0.002	0.019
	MPND	-1.597	2.154	16.836	0	0.004
	MGST1	1.238	7.284	7.862	0.008	0.046
	CRY1	-0.934	4.168	7.653	0.008	0.048
	PGLYRP1	0.327	-0.296	0.203	0.655	0.799
	NFIX	-0.268	5.53	0.359	0.552	0.727
	ST3GAL1	0.342	7.277	1.28	0.264	0.463
	MMP25	0.625	3.403	0.846	0.363	0.563
	IL32	-0.549	7.18	1.305	0.26	0.458
	PKD1	-0.876	5.944	2.486	0.122	0.284
	MAPK8IP2	-1.67	0.59	7.395	0.009	0.052
	MED24	0.186	4.906	0.37	0.546	0.723
	RHOBTB2	-0.453	6.474	0.373	0.544	0.721
	HEATR5B	-0.347	5.195	3.311	0.076	0.208
	SEC62	-0.897	6.117	7.28	0.01	0.054
	RPS20	-0.777	7.258	5.642	0.022	0.092
	CSDE1	-0.274	8.138	1.131	0.294	0.493
	UBE3C	0.098	6.015	0.345	0.56	0.733
	REV3L	0.831	6.413	12.357	0.001	0.012
	TENM1	0.368	5.2	0.45	0.506	0.69
	MASP2	0.851	5.601	5.003	0.031	0.115
	IYD	-0.842	3.327	2.205	0.145	0.318
	FAM76A	-0.591	2.951	5.434	0.025	0.099
	TRAF3IP3	1.057	3.173	7.149	0.011	0.056
	POMT2	0.57	3.844	10.733	0.002	0.019
	VTA1	-0.33	3.678	1.063	0.308	0.508
	MLXIPL	-0.348	6.052	0.516	0.476	0.666
	BAZ1B	-0.076	6.475	0.166	0.685	0.821
	RANBP9	0.415	4.882	2.942	0.094	0.239
	ETV7	1.443	1.4	9.315	0.004	0.029
	SPRTN	-0.046	3.055	0.044	0.835	0.913
	METTL13	-0.223	3.805	0.726	0.399	0.597
	DYRK4	0.271	2.514	1.426	0.239	0.437
	ZNF207	0.894	7.236	15.515	0	0.005
	UQCRC1	-0.275	5.996	0.553	0.461	0.654
	STARD3NL	-0.332	3.623	2.295	0.137	0.306
	CD9	-1.371	5.934	11.08	0.002	0.017
	HHATL	-1.381	-0.437	2.325	0.135	0.302
	NCAPD2	0.295	4.423	1.236	0.273	0.472
	IFFO1	0.421	3.476	1.395	0.244	0.442
	GIPR	-0.167	1.266	0.099	0.755	0.865
	PHF7	0.642	1.7	4.353	0.043	0.142
	SEMA3G	0.337	4.263	0.34	0.563	0.735
	NISCH	0.26	5.955	0.548	0.463	0.656
	STAB1	1.447	6.818	9.006	0.005	0.032
	FUZ	-1.092	1.403	9.542	0.004	0.027
	SLC6A13	-1.125	1.198	4.43	0.041	0.139
	IDS	-0.424	5.891	3.679	0.062	0.181
	PRSS3	1.297	0.746	2.819	0.101	0.25
	ZNF200	0.196	2.593	0.409	0.526	0.707
	CD4	-0.363	5.374	1.014	0.32	0.52
	LRRC23	-1.248	2.236	8.927	0.005	0.033
	BTK	0.228	3.482	0.315	0.578	0.746
	HFE	-0.271	3.037	0.597	0.444	0.638
	SCMH1	0.443	4.342	5.448	0.024	0.098
	FYN	0.354	5.015	1.454	0.235	0.432
	HIVEP2	0.207	7.028	0.362	0.551	0.726
	FMO1	0.966	-0.226	1.274	0.265	0.464
	ELOA	0	6.002	0	1	1
	LYPLA2	-0.327	4.041	0.856	0.36	0.56
	CLCN6	0.798	5.098	16.843	0	0.004
	MRC2	-0.075	5.854	0.011	0.916	0.955
	NME1-NME2	-2.136	0.357	3.734	0.06	0.177
	TSPAN9	-0.543	5.562	3.303	0.076	0.208
	BTBD7	0.047	4.855	0.084	0.773	0.876
	APBA3	0.24	3.262	0.294	0.591	0.755
	MKS1	0.266	2.958	1.486	0.23	0.426
	ABHD5	-0.619	4.752	4.714	0.036	0.126
	ANOS1	-3.171	4.67	25.881	0	0
	AKAP8L	0.409	5.716	5.285	0.027	0.104
	MBTD1	0.275	4.065	1.142	0.291	0.491
	UTP18	-0.726	3.698	9.471	0.004	0.028
	RNF216	0.37	5.46	4.381	0.042	0.141
	TTC19	0.038	5.197	0.041	0.84	0.916
	PTBP1	0.122	6.29	0.237	0.629	0.783
	DPF1	-0.211	-0.83	0.079	0.78	0.88
	SYT7	0.296	6.765	0.158	0.693	0.826
	LARS2	0.186	4.425	0.704	0.406	0.604
	PIK3C2A	0.14	6.667	0.214	0.646	0.795
	PLAUR	0.327	5.484	0.363	0.55	0.726
	ANLN	0.73	3.35	0.728	0.398	0.597
	WIZ	0.023	4.355	0.003	0.953	0.975
	RABGAP1	-0.011	5.377	0.005	0.942	0.969
	DCN	-0.717	7.925	4.541	0.039	0.134
	QPCTL	0.298	1.937	0.944	0.337	0.537
	PPP5C	-0.194	4.673	1.069	0.307	0.507
	CEP68	-0.355	4.906	3.563	0.066	0.189
	MAP4K3	-0.063	4.881	0.076	0.784	0.883
	ZBTB32	0.63	0.27	1.619	0.21	0.403
	TYROBP	-0.595	4.568	2.45	0.125	0.288
	LDAF1	-0.42	2.491	0.886	0.352	0.552
	BRCA1	0.86	3.27	3.799	0.058	0.173
	ERCC1	-0.225	4.507	0.902	0.348	0.548
	CD22	-0.237	2.25	0.141	0.709	0.837
	SEMA3B	-2.157	4.904	15.368	0	0.005
	MBTPS2	0.043	3.943	0.029	0.865	0.929
	PRICKLE3	0.472	2.025	2.227	0.143	0.315
	LTF	3.392	5.878	10.2	0.003	0.023
	EXTL3	0.028	4.698	0.013	0.911	0.953
	NR1H4	0.796	4.871	1.588	0.215	0.408
	ELOVL5	0.295	6.207	1.278	0.265	0.463
	ALOX5	0.231	5.342	0.226	0.637	0.789
	KDM5D	2.155	5.344	3.372	0.073	0.203
	CALCOCO1	0.216	6.538	0.891	0.351	0.551
	UBR7	-0.341	4.193	1.484	0.23	0.427
	MAP4K5	0.425	4.862	3.675	0.062	0.181
	EHD3	0.81	3.425	3.498	0.068	0.193
	PSMC4	-0.052	5.051	0.035	0.853	0.923
	MAN2B2	-0.19	5.573	0.63	0.432	0.627
	CLDN11	-0.081	1.24	0.052	0.82	0.904
	SLC25A39	0.237	4.951	0.411	0.525	0.706
	MVP	-0.399	6.962	1.144	0.291	0.49
	NUB1	-0.002	5.099	0	0.993	0.996
	PGM3	0.515	6.093	2.753	0.105	0.256
	RWDD2A	0.403	2.432	1.394	0.244	0.442
	CLK1	0.177	6.896	0.384	0.539	0.717
	POLR3B	0.415	3.574	2.875	0.097	0.244
	ANGEL1	0.666	4.695	6.549	0.014	0.068
	RNF14	-0.155	4.545	0.684	0.413	0.61
	DNASE1L1	-0.226	3.596	0.857	0.36	0.56
	DDX11	0.473	3.546	1.449	0.235	0.433
	HEBP1	-0.82	3.871	13.667	0.001	0.008
	GPRC5A	-1.131	7.73	2.369	0.131	0.297
	MAMLD1	1.753	2.964	12.832	0.001	0.011
	CD6	-0.249	1.888	0.208	0.651	0.798
	TACC3	0.134	3.873	0.095	0.76	0.868
	UFL1	0.233	4.985	0.371	0.546	0.723
	POLA2	1.099	3.641	17.841	0	0.003
	ZC3H3	0.342	3.972	0.667	0.419	0.616
	CAPN1	-0.191	5.851	0.27	0.606	0.767
	ACP3	0.29	1.884	0.28	0.6	0.763
	MDH1	-0.957	5.477	5.429	0.025	0.099
	SLC30A9	-0.062	5.187	0.044	0.835	0.913
	MTMR11	0.405	2.879	1.378	0.247	0.445
	COX15	0.42	4.653	5.863	0.02	0.086
	CCDC88C	-0.01	5.091	0	0.983	0.991
	YAF2	-0.087	4.304	0.129	0.721	0.845
	ZMYND11	-0.085	5.926	0.161	0.69	0.824
	WAS	1.002	3.551	6.051	0.018	0.081
	DPEP1	-0.12	-0.73	0.02	0.888	0.942
	BID	-0.145	3.896	0.197	0.66	0.803
	MATR3	-0.409	7.244	2.685	0.109	0.263
	NPC1L1	-0.13	4.672	0.038	0.846	0.919
	XYLT2	-0.046	3.764	0.015	0.903	0.949
	RGPD5	-0.5	5.909	2.72	0.107	0.26
	NUDCD3	-0.24	5.512	1.224	0.275	0.475
	CHDH	-0.641	5.28	3.765	0.059	0.175
	IL20RA	-2.864	2.095	20.728	0	0.001
	GLT8D1	-0.079	3.817	0.148	0.703	0.833
	ATP2C1	-0.766	5.802	9.414	0.004	0.028
	IGF1	2.551	6.048	38.522	0	0
	SLC38A5	0.529	2.423	0.873	0.355	0.556
	RALBP1	-0.514	5.568	8.061	0.007	0.043
	RUFY3	0.034	6.382	0.013	0.91	0.953
	CNTN1	-2.232	1.452	10.649	0.002	0.02
	SLC11A1	1.295	6.998	4.951	0.032	0.116
	WWTR1	-0.444	5.757	3.209	0.08	0.216
	AGPS	-0.514	5.184	3.994	0.052	0.161
	STEEP1	-0.882	3.204	10.257	0.003	0.022
	ATP1A2	-1.134	2.832	3.472	0.069	0.195
	TTC27	-0.43	3.164	4.007	0.052	0.161
	ZNF582	-0.824	0.398	6.527	0.014	0.069
	VSIG2	-2.115	2.804	12.55	0.001	0.011
	PHLDB1	-0.283	6.076	0.667	0.419	0.616
	MARCO	-1.005	6.586	3.551	0.066	0.19
	CYP24A1	1.383	1.707	2.053	0.159	0.338
	PRDM11	-1.659	3.408	24.95	0	0.001
	SYT13	-0.625	0.292	0.624	0.434	0.629
	SNAI2	1.815	3.646	12.675	0.001	0.011
	CD74	-0.607	9.347	1.457	0.234	0.432
	HGF	0.645	5.464	3.737	0.06	0.177
	ZRANB1	0.117	5.673	0.148	0.702	0.832
	NCDN	0.006	3.289	0	0.989	0.994
	ADGRA2	-0.013	4.253	0.001	0.979	0.989
	ZFP64	0.47	2.964	4.492	0.04	0.136
	MNAT1	-0.41	2.813	1.788	0.188	0.375
	SAMD4A	-0.022	6.303	0.007	0.935	0.966
	RUNX3	0.219	2.978	0.228	0.636	0.788
	MRE11	0.136	4.233	0.456	0.503	0.688
	PLEKHB1	-1.199	2.176	7.747	0.008	0.047
	SERPINB1	-0.638	6.018	2.944	0.094	0.238
	CYP3A43	0.624	0.657	0.232	0.633	0.786
	SLC7A9	-0.556	1.788	0.858	0.36	0.56
	SPAST	-0.083	3.952	0.118	0.733	0.852
	NRXN3	-0.221	2.077	0.249	0.621	0.777
	OSBPL5	0.07	3.894	0.022	0.882	0.939
	AQR	0.327	5.375	2.298	0.137	0.306
	CPS1	1.341	9.764	6.505	0.015	0.069
	C8B	-0.982	7.015	2.945	0.094	0.238
	FHL1	-1.439	6.558	5.086	0.029	0.112
	RTF2	-0.629	4.993	12.425	0.001	0.012
	NLRP2	-4.126	4.357	12.627	0.001	0.011
	SLC45A4	-0.511	3.685	1.531	0.223	0.418
	RNF10	-0.161	6.291	0.622	0.435	0.629
	ZNF839	0.535	3.112	3.903	0.055	0.167
	ZDHHC6	0.646	4.779	8.72	0.005	0.035
	GRAMD1B	0.423	4.18	0.461	0.501	0.686
	RNH1	-1.067	6.037	5.853	0.02	0.086
	NDUFS1	-0.286	6.733	1.81	0.186	0.371
	RB1CC1	-0.412	6.5	1.203	0.279	0.479
	ERP44	0.68	5.54	7.643	0.008	0.048
	ALAS1	0.146	6.382	0.242	0.626	0.781
	BIRC3	-0.279	7.246	0.207	0.652	0.798
	AKAP11	-0.124	6.048	0.248	0.621	0.777
	GLRX2	0.058	3.594	0.037	0.849	0.922
	SNAPC1	-0.217	2.405	0.475	0.494	0.681
	DERA	-0.112	3.843	0.102	0.751	0.862
	STRAP	-0.504	4.717	4.053	0.051	0.158
	ABCC2	-0.29	7.274	0.281	0.599	0.762
	DEF6	0.168	3.576	0.192	0.664	0.805
	PLEKHO1	-0.002	4.411	0	0.994	0.997
	GCLM	-0.217	4.646	0.313	0.579	0.747
	UBR2	-0.184	6.187	0.67	0.418	0.615
	EHD2	-0.68	5.726	2.311	0.136	0.304
	DEPDC1	1.09	1.257	1.547	0.221	0.415
	CCDC28A	-0.828	3.207	6.781	0.013	0.064
	RRAGD	-0.531	4.276	2.886	0.097	0.243
	HSF2	-0.1	2.556	0.081	0.778	0.879
	PHF20	-0.803	5.136	20.801	0	0.001
	HSD17B6	-2.888	5.905	29.404	0	0
	NR1H3	1.085	4.705	7.332	0.01	0.053
	TYMP	0.411	6.484	0.717	0.402	0.6
	NCAPH2	-1.21	4.23	7.016	0.011	0.059
	TOMM34	-0.081	3.507	0.058	0.811	0.899
	SEC63	0.113	5.919	0.101	0.752	0.863
	KPNA6	0.167	6.507	0.792	0.379	0.578
	VIM	-0.535	8.712	2.28	0.139	0.308
	RTEL1-TNFRSF6B	0.379	4.202	0.461	0.501	0.686
	FAS	1.216	5.69	21.647	0	0.001
	RNASET2	0.658	5.274	3.599	0.065	0.186
	CD44	-0.076	7.592	0.036	0.851	0.922
	AGPAT4	0.283	4.335	0.912	0.345	0.545
	SLAMF7	1.037	3.543	3.806	0.058	0.173
	BTN3A1	0.293	4.989	0.675	0.416	0.613
	MIPEP	-0.342	2.828	1.636	0.208	0.4
	PRKCH	-0.532	5.227	3.531	0.067	0.191
	IFNGR1	-0.445	6.626	1.236	0.273	0.472
	B4GALT7	0.049	3.43	0.021	0.884	0.94
	SH2D2A	0.059	1.436	0.015	0.902	0.948
	VRK2	-0.321	3.334	1.317	0.258	0.456
	TNFRSF1B	1.241	6.308	8.348	0.006	0.039
	VEZT	0.301	5.314	1.582	0.215	0.409
	POU2F2	2.429	3.262	24.765	0	0.001
	BRD9	-0.23	4.93	1.038	0.314	0.513
	SNX1	-0.75	6.385	20.094	0	0.002
	TBPL1	-0.322	2.047	0.777	0.383	0.582
	BMAL2	1.617	4.238	18.157	0	0.003
	BCLAF1	-0.158	6.863	0.331	0.568	0.738
	SLC39A9	0.031	5.954	0.016	0.9	0.948
	ANK1	-0.206	1.405	0.175	0.677	0.815
	TFB1M	0.563	2.457	4.569	0.038	0.133
	RABEP1	0.036	5.395	0.028	0.868	0.931
	HMGB3	-0.274	5.178	0.173	0.68	0.816
	NUP160	-0.227	4.917	1.996	0.165	0.346
	BAK1	0.439	2.937	1.343	0.253	0.452
	MUSK	-0.181	1.898	0.178	0.675	0.813
	IKZF2	0.118	3.717	0.149	0.701	0.832
	GRN	-1.115	7.539	5.631	0.022	0.093
	FAM13B	-0.177	4.857	0.427	0.517	0.7
	ARHGAP31	-0.33	6.214	1.379	0.247	0.445
	CENPQ	-1.273	0.517	4.526	0.039	0.134
	SARS1	-0.073	6.353	0.054	0.818	0.903
	RANBP3	-0.308	4.625	1.236	0.273	0.472
	ARID4A	-0.126	5.103	0.188	0.667	0.808
	EIPR1	-0.052	2.796	0.035	0.852	0.923
	PNPLA6	-0.585	5.587	1.203	0.279	0.479
	IFT88	0.227	3.758	0.435	0.513	0.696
	ALG1	-0.24	3.423	1.154	0.289	0.488
	ZCCHC8	0.511	4.498	8.206	0.007	0.041
	ABCF2	0.01	3.895	0.001	0.971	0.984
	CHPF2	0.858	5.216	8.236	0.006	0.04
	LRRC7	-0.513	1.135	0.513	0.478	0.667
	FUT8	0.496	3.702	1.663	0.204	0.395
	UBA6	0.31	5.724	1.008	0.321	0.521
	GAB2	0.116	5.985	0.174	0.679	0.816
	ATP6V0A1	0.768	6.066	25.392	0	0
	PIAS1	0.198	5.504	0.603	0.442	0.636
	SLC4A7	0.465	5.084	2.041	0.161	0.339
	APBA2	0.724	2.238	2.174	0.148	0.321
	MAP2K3	0.077	5.39	0.035	0.852	0.923
	CLXN	-2.356	0.709	12.194	0.001	0.013
	TMSB10	-0.643	7.819	3.91	0.055	0.166
	ASTE1	-0.203	2.088	0.513	0.478	0.667
	RNF19A	-0.129	6.552	0.112	0.739	0.855
	PEX3	0.044	3.265	0.018	0.895	0.945
	GABARAPL2	-0.554	4.181	7.966	0.007	0.044
	MYOC	-2.425	0.132	7.385	0.01	0.052
	SH3YL1	-0.413	4.264	4.61	0.038	0.131
	FAM136A	0.423	3.875	3.733	0.06	0.177
	VCL	-0.515	6.937	4.926	0.032	0.117
	DEPDC1B	-1.071	0.794	1.303	0.26	0.459
	DAPK2	-1.128	4.979	7.203	0.01	0.056
	NSMAF	0.435	4.026	5.559	0.023	0.095
	ADSS2	-0.186	4.418	0.62	0.436	0.63
	STAP1	-0.88	-0.677	2.121	0.153	0.328
	TIMP2	0.618	6.875	2.977	0.092	0.236
	RFC1	0.174	5.552	0.419	0.521	0.703
	TBC1D23	-0.336	4.757	1.359	0.25	0.448
	CUL3	-0.05	5.299	0.038	0.845	0.919
	MYOM2	-0.815	3.264	0.836	0.366	0.566
	OTC	-0.458	3.756	0.336	0.565	0.737
	CYP46A1	0.358	0.876	0.528	0.472	0.662
	ZZZ3	0.539	5.338	3.712	0.061	0.179
	USP2	-0.809	2.123	2.978	0.092	0.236
	TUBG2	0.867	3.117	10.753	0.002	0.019
	RPL26L1	-0.665	1.843	2.499	0.121	0.283
	FLT4	-0.862	4.184	4.7	0.036	0.126
	NSUN2	0.072	5.467	0.16	0.691	0.824
	FBXO42	0.513	4.956	3.587	0.065	0.187
	MFAP3	0.645	4.783	9.2	0.004	0.03
	MRI1	-0.138	3.647	0.15	0.7	0.831
	METTL1	0.205	1.881	0.407	0.527	0.708
	AGA	-0.221	2.643	0.796	0.377	0.577
	PI4K2B	-0.871	4.687	7.68	0.008	0.048
	BOD1L1	0.361	6.927	1.996	0.165	0.346
	MAT2B	-0.278	4.433	1.375	0.248	0.446
	TLL1	-0.246	1.854	0.241	0.626	0.781
	EDC4	-0.059	5.146	0.039	0.844	0.919
	TRIO	0.409	7.409	3.672	0.062	0.181
	VCAN	1.93	7.78	18.357	0	0.002
	CLEC16A	0.239	5.605	1.282	0.264	0.463
	MSR1	-1.548	5.978	16.499	0	0.004
	CDH1	-0.65	6.797	3.384	0.073	0.202
	MTREX	-0.468	5.09	4.016	0.052	0.16
	DNAH5	0.145	5.39	0.1	0.754	0.864
	ZFYVE16	0.15	5.848	0.253	0.617	0.776
	RIPOR1	0.036	5.163	0.009	0.925	0.96
	C6	-0.396	7.602	0.416	0.523	0.704
	RAI14	0.41	5.623	3.514	0.068	0.192
	PNKP	-0.288	4.117	0.563	0.457	0.651
	PHLPP2	-0.043	3.981	0.059	0.81	0.898
	SPDL1	0.823	2.017	3.807	0.058	0.173
	STAU2	0.281	4.678	1.014	0.32	0.52
	SLC66A1	-0.433	2.829	1.518	0.225	0.42
	CTNS	0.513	3.822	3.477	0.069	0.195
	RTN4R	-1.053	1.088	2.972	0.092	0.236
	PHF23	-0.067	3.597	0.062	0.804	0.894
	INPP4A	0.477	5.023	5.397	0.025	0.1
	RAB27B	1.034	3.688	2.716	0.107	0.26
	PSMA4	-0.273	4.935	0.712	0.404	0.601
	MYO16	0.53	1.81	2.052	0.159	0.338
	LSG1	0.007	5.242	0.001	0.973	0.985
	PARP3	0.328	3.524	1.327	0.256	0.454
	TNC	2.815	8.203	11.948	0.001	0.014
	THAP3	-0.521	2.296	1.575	0.216	0.41
	RIPOR3	0.355	3.972	0.7	0.407	0.604
	TDP1	0.366	2.962	2.117	0.153	0.329
	AIFM2	0.3	3.825	0.887	0.352	0.552
	SPATA7	0.188	2.283	0.341	0.563	0.735
	MED17	0.13	4.14	0.619	0.436	0.631
	RETSAT	-0.135	5.896	0.204	0.654	0.799
	CAPG	-1.439	5.324	6.193	0.017	0.077
	AP2S1	-0.1	3.976	0.086	0.77	0.874
	USH2A	-0.483	1.078	0.594	0.445	0.639
	TG	1.201	1.283	6.093	0.018	0.079
	ADAM28	1.333	2.882	7.608	0.009	0.049
	DCUN1D1	-0.072	4.887	0.044	0.834	0.912
	JADE2	-0.46	4.979	2.619	0.113	0.27
	LCP2	1.034	5.058	9.469	0.004	0.028
	TRIT1	0.443	3.1	4.569	0.038	0.133
	ADRB1	-1.958	2.678	20.292	0	0.002
	CUL7	0.072	4.627	0.044	0.835	0.912
	CTNNA1	-0.536	7.799	5.235	0.027	0.106
	PHKA2	0.398	6.492	1.739	0.194	0.383
	CNTLN	0.579	4.552	3.238	0.079	0.213
	EPHA3	-1.526	2.493	9.057	0.004	0.031
	HSPA5	-0.379	8.183	1.117	0.297	0.496
	DSG2	-0.524	5.35	1.595	0.214	0.407
	GEMIN8	-0.109	2.385	0.207	0.652	0.798
	OFD1	0.483	5.244	4.672	0.036	0.128
	GPM6B	-0.645	3.042	2.297	0.137	0.306
	PREX2	-0.839	4.752	6.872	0.012	0.062
	WDR37	0.454	4.573	6.153	0.017	0.078
	YTHDC2	0.302	5.404	1.857	0.18	0.365
	CTPS2	0.242	3.713	1.105	0.299	0.499
	ATP6V1H	-0.361	3.957	2.787	0.103	0.253
	POLR2B	-0.024	5.776	0.008	0.929	0.963
	ATOSA	0.432	5.219	2.293	0.137	0.306
	ARAP2	-0.589	5.761	5.083	0.029	0.112
	TPR	0.225	7.252	0.632	0.431	0.627
	CP	1.388	10.827	5.71	0.021	0.09
	KATNIP	0.113	4.534	0.222	0.64	0.791
	DTNBP1	0.158	2.611	0.504	0.482	0.67
	XK	-0.261	1.531	0.37	0.546	0.723
	ANO2	-0.255	2.85	0.296	0.589	0.754
	C12orf4	0.139	3.175	0.32	0.575	0.743
	SCML1	0.576	4.726	1.939	0.171	0.354
	WWC3	-0.438	5.593	1.293	0.262	0.46
	ARHGAP6	-0.462	3.353	1.662	0.204	0.395
	MAP4	0.564	7.77	7.576	0.009	0.049
	GOPC	0.208	4.661	0.912	0.345	0.545
	ROS1	-0.07	6.241	0.006	0.94	0.968
	USP28	0.449	4.24	3.155	0.083	0.22
	HDAC9	-0.452	2.518	1.408	0.242	0.44
	TSPAN17	0.374	3.866	1.646	0.207	0.398
	NOP16	-0.775	2.865	4.402	0.042	0.14
	CC2D2A	0.024	4.41	0.006	0.936	0.966
	RRM2B	-0.321	4.666	0.839	0.365	0.565
	ZNF800	-0.053	4.797	0.03	0.863	0.929
	SNX29	0.308	5.036	1.664	0.204	0.395
	LMO3	1.166	5.21	3.199	0.081	0.216
	MRPS10	0.45	4.014	2.175	0.148	0.321
	RSF1	-0.157	5.788	0.392	0.534	0.714
	VPS13D	0.422	7.83	9.319	0.004	0.029
	CELF2	0.165	5.954	0.244	0.624	0.78
	FAM120A	0.574	6.943	10.894	0.002	0.018
	R3HDM1	1.105	4.026	27.305	0	0
	COL9A2	-1.266	1.922	2.858	0.098	0.246
	KITLG	-0.693	4.356	1.675	0.203	0.393
	ERCC8	0.206	4.067	0.858	0.36	0.56
	ADAMTS6	1.072	1.543	8.17	0.007	0.041
	H6PD	0.223	8.09	0.356	0.554	0.728
	VAMP3	-0.575	5.231	6.169	0.017	0.077
	PER3	-1.208	5.078	9.999	0.003	0.024
	TNFRSF9	-1	1.328	2.87	0.098	0.245
	LTBP1	0.062	5.61	0.031	0.86	0.927
	RCN1	-0.335	5.808	0.749	0.392	0.591
	ELN	-1.796	5.281	5.217	0.028	0.106
	RFC2	-0.164	3.336	0.202	0.655	0.8
	ARID1B	0.532	6.957	11.321	0.002	0.016
	CLPTM1L	-0.241	6.215	0.602	0.442	0.636
	NEDD4L	-0.564	7.3	3.618	0.064	0.185
	FOXP3	-0.224	1.533	0.078	0.781	0.881
	PPP1R3F	-1.263	1.71	5.963	0.019	0.083
	HEXB	-0.869	5.627	7.976	0.007	0.044
	PTCD2	0.764	3.425	6.102	0.018	0.079
	NEXMIF	-0.652	0.8	1.545	0.221	0.415
	JKAMP	0.409	3.723	1.583	0.215	0.409
	DKK3	-0.73	5.328	2.081	0.157	0.334
	ARHGEF5	-0.615	5.029	3.862	0.056	0.169
	NFE2L3	-0.877	4.86	3.452	0.07	0.197
	MCUR1	-0.393	3.877	2.57	0.116	0.275
	LIMA1	0.156	5.749	0.226	0.637	0.789
	LETMD1	0.834	4.778	19.95	0	0.002
	SLC4A8	-0.803	2.377	5.721	0.021	0.09
	LAMC3	-0.158	4.285	0.07	0.793	0.888
	PTGER3	-0.655	0.855	1.471	0.232	0.429
	TNIP3	1.787	2.731	3.918	0.054	0.166
	MAPK9	0.437	4.446	4.393	0.042	0.141
	COL23A1	-1.412	0.779	7.039	0.011	0.059
	BCAR1	-0.333	5.786	0.499	0.484	0.672
	FHIP1B	0.258	4.742	0.562	0.457	0.651
	HERPUD1	0.22	6.255	0.72	0.401	0.599
	HOMER3	0.146	2.499	0.08	0.778	0.879
	RAD51	-0.512	0.588	0.608	0.44	0.634
	POLQ	1.624	2.589	4.937	0.032	0.117
	PIK3CB	0.319	5.021	1.755	0.192	0.38
	CYBA	-0.304	5.517	0.337	0.564	0.736
	THOC3	-0.62	3.179	3.116	0.085	0.224
	HEBP2	0.513	5.669	3.476	0.069	0.195
	MPHOSPH9	1.051	4.707	14.219	0.001	0.007
	PLEKHA5	0.416	5.854	1.54	0.222	0.416
	PRSS8	-1.035	4.92	3.171	0.082	0.219
	SIKE1	0.084	4.421	0.094	0.761	0.869
	RRP12	-0.272	4.531	0.499	0.484	0.672
	FNIP2	-0.139	7.005	0.206	0.652	0.798
	MSMO1	-0.067	7.278	0.017	0.897	0.946
	TTC17	0.738	6.238	11.102	0.002	0.017
	ALX4	-1.201	-0.238	6.404	0.015	0.072
	FSTL4	-2.557	0.032	18.492	0	0.002
	FOXN3	-0.04	6.647	0.034	0.855	0.924
	METTL24	0.589	0.67	2.738	0.106	0.258
	AKR7A2	-0.781	3.421	5.526	0.024	0.096
	MRTO4	-0.578	3.653	3.433	0.071	0.198
	NNAT	0.332	1.475	0.927	0.341	0.542
	USE1	-0.727	2.339	10.017	0.003	0.024
	MCF2L2	0.069	1.891	0.017	0.896	0.946
	NRIP2	0.22	1.75	0.347	0.559	0.732
	LAMA3	-1.915	5.924	13.064	0.001	0.01
	AP5M1	0.013	4.707	0.002	0.966	0.981
	ANAPC4	0.355	4.104	2.463	0.124	0.287
	KCNQ1	-0.197	3.115	0.124	0.727	0.848
	TRAPPC3	-0.035	4.066	0.046	0.831	0.91
	THRAP3	-0.13	6.95	0.485	0.49	0.677
	PHPT1	-0.253	3.836	0.577	0.452	0.645
	LY75	0.23	3.187	0.327	0.57	0.74
	ARID4B	-0.246	5.846	1.315	0.258	0.456
	OPN3	-1.603	3.939	19.811	0	0.002
	SDCCAG8	0.395	4.642	2.152	0.15	0.324
	PTPRN	2.259	0.489	4.97	0.031	0.116
	HHAT	-0.782	2.341	6.162	0.017	0.078
	KIF1B	0.256	6.894	2.54	0.119	0.278
	FOXC1	-0.926	1.66	4.186	0.047	0.151
	TBC1D22A	0.042	4.243	0.02	0.889	0.942
	SYNE2	-0.013	8.838	0.002	0.967	0.982
	PLEKHH1	-0.349	2.851	0.815	0.372	0.572
	ATP9A	-0.925	5.404	13.283	0.001	0.009
	CHRDL2	1.352	0.906	4.485	0.04	0.136
	FAM168A	0.477	5.488	5.208	0.028	0.107
	RELT	0.607	4.32	1.54	0.222	0.416
	GALC	-0.146	4.46	0.385	0.539	0.717
	NOP58	-0.359	4.898	1.045	0.313	0.512
	SZRD1	0.115	5.732	0.233	0.632	0.785
	KCNH2	-1.964	0.501	10.739	0.002	0.019
	CUL1	0.108	5.557	0.155	0.696	0.828
	FAM114A2	0.237	3.883	1.617	0.211	0.403
	CYFIP2	0.726	5.629	9.551	0.004	0.027
	TAB2	0.839	5.691	9.829	0.003	0.025
	GINM1	-0.506	4.349	3.061	0.088	0.229
	EIF2AK2	0.34	6.119	1.548	0.22	0.415
	USP36	-0.155	5.572	0.309	0.581	0.748
	KMT2C	0.805	8.563	16.398	0	0.004
	MCOLN3	-0.648	2.026	1.368	0.249	0.446
	CCDC85A	-1.95	2.616	8.256	0.006	0.04
	PUM2	-0.362	6.308	2.392	0.13	0.295
	MRPL43	-0.205	3.472	1.259	0.268	0.468
	ITIH4	1.911	10.507	17.181	0	0.003
	ITIH1	3.741	8.496	30.656	0	0
	HPF1	0.238	1.784	0.524	0.473	0.664
	ZFR	0.092	5.986	0.17	0.682	0.818
	ZNF280C	0.213	2.172	0.664	0.42	0.616
	TRAF1	1.915	4.585	11.252	0.002	0.017
	RC3H2	0.178	5.798	0.869	0.357	0.557
	IL17RB	0.167	4.46	0.209	0.65	0.797
	TRAF3IP2	1.126	4.796	16.046	0	0.004
	GYG2	-0.208	2.459	0.192	0.664	0.805
	DCBLD2	0.03	5.012	0.013	0.91	0.953
	SERPINB3	2.209	1.835	1.905	0.175	0.358
	SOAT1	-0.774	5.246	7.272	0.01	0.054
	PKP2	-2.147	5.06	21.745	0	0.001
	F7	-1.273	4.44	3.154	0.083	0.22
	GDI2	-0.182	6.706	0.296	0.589	0.754
	PRDM1	0.441	4.545	0.738	0.395	0.594
	ATG5	-0.62	3.968	7.876	0.008	0.045
	TMCC3	-0.644	3.873	4.64	0.037	0.129
	PITHD1	-0.259	4.389	1.354	0.251	0.45
	MTA3	0.211	3.801	1.255	0.269	0.468
	USP13	-0.401	5.069	2.513	0.12	0.281
	ATP11B	-0.098	6.058	0.139	0.711	0.838
	LAMC2	-1.277	5.463	3.657	0.063	0.182
	CDK14	0.035	4.586	0.022	0.883	0.939
	SEC61A1	0.49	7.783	4.618	0.037	0.13
	PPP1R12A	0.084	6.112	0.127	0.724	0.846
	RASGRF1	-0.142	3.28	0.027	0.871	0.933
	CAMK2B	-0.986	1.085	1.854	0.181	0.365
	CROCC	-1.763	4.224	19.004	0	0.002
	POLR3E	0.154	4.958	0.608	0.44	0.635
	ATP2B4	0.004	7.863	0	0.988	0.993
	ZC3H11A	0.403	6.235	3.689	0.062	0.18
	RIOK2	-0.376	3.263	1.279	0.265	0.463
	YIPF1	0.441	4.148	2.604	0.114	0.271
	NDC1	0.403	3.36	1.075	0.306	0.506
	DGKG	0.116	2.847	0.134	0.717	0.841
	FLYWCH1	-0.743	4.281	2.593	0.115	0.272
	UNKL	-0.118	3.16	0.079	0.78	0.88
	TBXAS1	0.516	4.33	1.38	0.247	0.444
	PARP12	0.545	5.104	3.521	0.068	0.192
	ALDH18A1	0.486	4.832	2.9	0.096	0.242
	TARBP1	-0.197	4.528	0.667	0.419	0.616
	GATB	-0.267	3.276	1.264	0.267	0.467
	MXD1	0.762	6.094	3.467	0.07	0.195
	CDK17	0.264	5.291	0.87	0.356	0.557
	DNAJC25	0.14	3.622	0.238	0.628	0.782
	SLC2A3	0.282	7.587	0.313	0.579	0.747
	PSD	-1.124	1.374	4.274	0.045	0.146
	CTDP1	-0.437	4.373	1.518	0.225	0.42
	YBX3	-0.719	6.595	3.874	0.056	0.168
	STYK1	0.269	-0.108	0.167	0.685	0.82
	WNK1	0.428	8.348	3.938	0.054	0.165
	CCAR1	0.836	5.614	8.819	0.005	0.034
	OGFR	-0.351	5.479	0.917	0.344	0.544
	GNA15	0.465	3.362	0.709	0.405	0.602
	CREB3L3	4.188	6.768	30.41	0	0
	PIGV	0.089	3.698	0.097	0.757	0.866
	PTPRU	-0.767	4.947	2.774	0.103	0.254
	SNRNP40	-0.09	3.899	0.175	0.678	0.815
	RIMBP2	-0.55	-0.057	0.644	0.427	0.623
	COL11A1	2.74	1.821	6.974	0.012	0.06
	QSER1	0.81	5.426	10.169	0.003	0.023
	MPC1	-0.053	5.018	0.018	0.894	0.945
	ACAA1	-0.397	5.891	1.504	0.227	0.423
	BCAT1	0.622	5.463	2.277	0.139	0.308
	HDAC7	0.77	5.811	3	0.091	0.234
	LZTS1	0.416	2.379	0.45	0.506	0.69
	PRDM6	-0.392	2.492	0.697	0.408	0.605
	SPAG4	1.081	1.929	3.469	0.07	0.195
	NCKAP1	-0.194	6.536	0.751	0.391	0.59
	MRPS35	-0.304	4.469	0.894	0.35	0.55
	GUCY1B1	0.45	3.185	1.966	0.168	0.35
	SFSWAP	0.265	5.648	1.698	0.2	0.389
	TNK2	-0.375	4.736	0.797	0.377	0.577
	MON2	0.11	6.427	0.336	0.566	0.737
	CDH3	1.419	3.397	2.624	0.113	0.269
	GPBP1	-0.254	6.037	0.431	0.515	0.698
	DGAT2	0.824	5.032	3.279	0.077	0.21
	ZNF112	0.2	1.835	0.515	0.477	0.666
	CS	0.935	6.311	23.464	0	0.001
	LTK	-0.862	1.427	2.53	0.119	0.279
	MRPS24	-0.412	3.499	2.333	0.134	0.301
	ELMO2	0.959	4.9	20.074	0	0.002
	WAPL	-0.081	5.936	0.15	0.701	0.831
	VMP1	0.828	8.238	4.856	0.033	0.12
	APPBP2	-0.004	4.768	0	0.985	0.992
	POLD1	-0.594	3.146	1.277	0.265	0.464
	SEZ6	0.722	0.071	2.421	0.127	0.291
	EIF4B	-0.099	8.195	0.157	0.694	0.826
	SLC6A16	0.365	1.738	0.981	0.328	0.528
	BICRA	-0.001	2.688	0	0.998	0.999
	SPHK2	-0.099	3.043	0.042	0.838	0.915
	RPL18	-0.924	6.79	6.262	0.016	0.075
	CA11	-1.576	0.805	19.619	0	0.002
	ISOC2	-0.725	3.786	2.581	0.116	0.274
	U2AF2	-0.601	5.503	4.786	0.034	0.123
	EPN1	-0.522	5.7	1.827	0.184	0.369
	MED29	-0.316	4.708	1.933	0.172	0.355
	AHRR	-0.577	1.116	1.257	0.269	0.468
	ZNF275	0.456	4.689	5.52	0.024	0.096
	MTMR1	0.245	4.265	2.469	0.124	0.286
	GPC1	-0.822	4.789	2.27	0.139	0.309
	ADCK1	0.076	2.2	0.049	0.826	0.907
	HAGH	-1.24	4.64	18.592	0	0.002
	RNF4	0.603	5.174	9.169	0.004	0.03
	CASP8	0.707	4.673	10.756	0.002	0.019
	LIMCH1	-1.56	7.555	26.927	0	0
	INTS13	0.652	3.455	3.252	0.079	0.212
	TM7SF3	-0.399	4.742	1.64	0.207	0.399
	SPA17	-0.052	1.974	0.022	0.884	0.94
	TSPAN32	-0.895	0.75	3.103	0.085	0.225
	CCN5	-0.751	3.019	1.631	0.209	0.401
	ST3GAL6	-0.423	3.928	1.47	0.232	0.429
	ATP2C2	-0.341	3.899	0.227	0.637	0.788
	NGFR	0.633	2.442	1.992	0.166	0.346
	CDON	-0.873	3.523	6.943	0.012	0.061
	TAF2	0.448	5.399	4.429	0.041	0.139
	HIPK2	1.006	7.914	21.644	0	0.001
	TNPO3	0.254	5.228	2.5	0.121	0.282
	BORCS8-MEF2B	-0.691	0.384	0.822	0.37	0.57
	RFXANK	-0.151	3.118	0.196	0.66	0.803
	TMEM161A	-0.287	2.995	0.427	0.517	0.7
	LPAR2	1.376	2.39	7.767	0.008	0.047
	CTSA	1.216	6.36	20.056	0	0.002
	SUGP2	0.858	6.386	23.92	0	0.001
	SLC12A2	-1.001	4.558	16.641	0	0.004
	SNX24	-0.054	3.016	0.058	0.811	0.899
	EYA2	0.34	1.249	0.485	0.49	0.677
	CNN2	0.479	5.9	1.829	0.184	0.369
	ABCA7	0.407	4.239	0.746	0.393	0.591
	SNCAIP	0.472	2.533	0.967	0.331	0.531
	DDX20	0.125	3.5	0.319	0.575	0.744
	BTBD1	-0.135	5.195	0.135	0.715	0.841
	FAR2	0.134	3.936	0.138	0.712	0.839
	BCAS1	-0.724	0.911	1.223	0.275	0.475
	CHI3L2	1.712	3.972	4.718	0.036	0.126
	SBNO2	0.075	6.341	0.025	0.875	0.936
	PMS1	0.611	3.44	5.755	0.021	0.089
	HMG20B	-1.338	4.479	11.801	0.001	0.014
	CALCRL	-0.318	5.03	0.596	0.445	0.638
	TAF11	0.332	4.491	4.169	0.048	0.152
	ANKS1A	-0.595	5.55	5.028	0.03	0.114
	AP3D1	0.179	6.579	0.329	0.569	0.739
	ZNF76	0.449	4.172	3.141	0.084	0.221
	NHERF2	-1.736	5.493	11.558	0.001	0.015
	NTHL1	-1.972	1.909	13.65	0.001	0.008
	BLTP3A	0.528	5.441	9.41	0.004	0.028
	GNAI3	-0.358	5.612	1.641	0.207	0.399
	IPO5	-0.225	5.853	1.075	0.306	0.506
	OAT	-0.637	4.692	2.885	0.097	0.244
	WDR3	-0.291	4.403	1.338	0.254	0.453
	PKN2	0.014	5.566	0.003	0.958	0.978
	WDR18	-1.109	2.765	4.477	0.04	0.136
	TRAM2	1.305	5.927	22.013	0	0.001
	NTN1	-1.188	3.593	8.877	0.005	0.033
	GLP2R	-2.814	-0.141	18.149	0	0.003
	MCM10	0.748	1.174	1.189	0.282	0.481
	DGKA	1.392	4.489	14.448	0	0.007
	ERBB3	-0.33	6.685	1.213	0.277	0.477
	ANKRD44	-0.11	5.317	0.197	0.659	0.803
	KARS1	0.119	5.579	0.206	0.652	0.798
	ADAT1	0.606	4.357	8.46	0.006	0.038
	PDIA5	-0.158	4.885	0.227	0.636	0.788
	TBC1D22B	0.653	3.493	10.506	0.002	0.021
	NDUFB4	0.186	4.113	0.269	0.607	0.768
	SPEN	0.498	7.505	4.967	0.031	0.116
	MYLK	0.094	7.7	0.063	0.803	0.894
	ZC3H15	-0.858	4.815	6.743	0.013	0.065
	MAP2K4	-0.031	4.516	0.013	0.91	0.953
	PACC1	0.495	1.807	3.226	0.08	0.214
	SLK	-0.387	6.735	1.39	0.245	0.443
	CYB5R4	0.034	3.929	0.024	0.879	0.938
	COL17A1	-1.753	3.718	1.872	0.179	0.362
	GSTO2	-1.412	2.875	11.625	0.001	0.015
	SEC61A2	1.52	2.784	21.195	0	0.001
	PRKCQ	0.055	2.451	0.018	0.894	0.945
	TLE2	-0.988	3.673	4.108	0.049	0.155
	ASB1	0.118	4.56	0.115	0.736	0.854
	FAM107B	-0.649	6.397	2.627	0.113	0.269
	ME1	0.146	3.267	0.212	0.648	0.796
	TBC1D1	0.105	5.31	0.25	0.619	0.777
	CDK13	0.278	6.232	2.321	0.135	0.303
	MTHFD2	0.408	4.502	0.833	0.367	0.567
	SLC9A7	-0.258	4.16	0.876	0.355	0.555
	FOXJ2	0.277	4.569	2.314	0.136	0.304
	YBX1	-0.221	7.021	0.638	0.429	0.625
	PDE4A	0.415	3.682	0.836	0.366	0.566
	PPP2R5A	-1.425	5.331	33.239	0	0
	ELAVL1	0.038	4.668	0.054	0.818	0.903
	TIE1	-0.656	4.491	2.831	0.1	0.249
	DIP2B	0.226	6.013	1.714	0.198	0.387
	SMARCD1	0.222	4.395	1.32	0.257	0.456
	KDM4A	-0.042	5.207	0.047	0.829	0.909
	NFYC	0.226	3.994	1.248	0.27	0.47
	ZMYND12	-0.886	-0.114	2.506	0.121	0.282
	SLC9A3	-0.865	1.095	2.351	0.133	0.3
	NGEF	-0.644	3.755	1.119	0.296	0.496
	ASPM	2.047	4.701	4.698	0.036	0.127
	CD84	0.13	4.835	0.069	0.794	0.889
	ELOVL1	0.047	4.242	0.035	0.852	0.923
	SPI1	0.046	4.789	0.008	0.928	0.962
	POLR1H	-0.458	2.338	3.512	0.068	0.192
	MPPED2	-1.37	-0.078	5.355	0.026	0.102
	CLDN18	-3.525	6.228	14.829	0	0.006
	ZBTB11	0.069	5.105	0.068	0.796	0.89
	ATXN3	-0.474	4.494	5.396	0.025	0.1
	GOLGA5	0.325	5.392	0.756	0.39	0.589
	FGFR2	-1.378	5.378	10.656	0.002	0.02
	LRRC40	-0.321	3.613	0.537	0.468	0.66
	ISOC1	-0.598	4.195	3.299	0.077	0.208
	EML1	-0.308	3.447	1.169	0.286	0.485
	TRMT11	-0.061	4.165	0.039	0.844	0.919
	THUMPD1	-0.258	4.953	1.407	0.242	0.44
	MSANTD3	0.734	3.603	5.085	0.029	0.112
	KIF26A	-2.29	2.103	14.435	0	0.007
	ATG2B	0.531	6.434	5.777	0.021	0.088
	ARFGEF1	0.463	6.472	4.142	0.048	0.153
	ACSM2B	0.278	6.989	0.09	0.765	0.871
	ZFAT	0.079	3.879	0.033	0.856	0.925
	MTFR1	0.58	4.234	5.158	0.028	0.109
	STAG3	0.304	0.263	0.795	0.378	0.577
	FECH	-0.051	4.099	0.05	0.825	0.907
	MYO9A	-0.206	6.095	0.836	0.366	0.566
	DDX3Y	0.56	6.025	0.21	0.649	0.797
	PFKP	-0.31	5.202	0.321	0.574	0.743
	IDI1	-0.57	5.981	1.162	0.287	0.487
	SP100	0.59	6.495	9.164	0.004	0.03
	KLF6	-1.873	7.787	29.683	0	0
	PLPP1	-0.267	4.182	0.655	0.423	0.62
	NEO1	0.178	4.818	0.502	0.482	0.67
	TRAM1	0.155	6.674	0.139	0.711	0.838
	PHKA1	0.33	3.375	0.973	0.33	0.53
	TNFRSF1A	0.143	6.629	0.348	0.558	0.731
	CACNB1	0.948	3.217	2.512	0.121	0.281
	EVI5	-0.416	5.269	4.097	0.049	0.156
	STOML1	-0.557	2.771	1.648	0.206	0.398
	PKM	0.2	8.148	0.281	0.599	0.762
	DHX29	0.086	4.738	0.129	0.721	0.845
	DNTTIP2	-1.071	5.016	8.3	0.006	0.04
	METTL22	0.831	3.776	14.736	0	0.006
	TP53BP1	0.013	5.68	0.004	0.95	0.974
	TRO	1.154	3.32	10.545	0.002	0.02
	RRP15	-0.399	3.68	1.801	0.187	0.373
	RHOA	-0.38	7.584	2.876	0.097	0.244
	DHX8	0.105	5.344	0.417	0.522	0.704
	PRKCZ	-0.688	4.525	2.371	0.131	0.297
	ZFY	0.352	3.199	0.123	0.727	0.848
	IARS2	-0.43	5.661	2.794	0.102	0.252
	SYT1	-1.124	1.634	9.268	0.004	0.03
	NAV3	1.953	4.553	13.745	0.001	0.008
	IDH3G	0.654	3.908	5.611	0.023	0.093
	ROGDI	-0.627	2.962	2.028	0.162	0.341
	PDZD4	-1.532	1.333	15.39	0	0.005
	ATP2B3	-1.26	-0.8	1.581	0.216	0.409
	ROCK1	-0.434	6.607	3.136	0.084	0.222
	CBFB	0.145	4.423	0.574	0.453	0.646
	PDK3	0.314	5.4	1.794	0.188	0.374
	HYAL2	-1.135	5.712	6.974	0.012	0.06
	HDAC4	-0.023	4.536	0.005	0.947	0.972
	RASSF1	-0.52	4.051	2.34	0.134	0.301
	FGFR3	-1.511	4.018	9.335	0.004	0.029
	IFI35	-0.398	3.151	0.942	0.337	0.538
	HEATR6	0.663	3.657	6.403	0.015	0.072
	COASY	0.62	4.865	4.3	0.044	0.145
	PLEKHH3	-0.236	3.411	0.331	0.568	0.738
	MEF2A	0.742	6.2	10.833	0.002	0.019
	OTUD5	0.228	4.73	1.693	0.2	0.39
	TFE3	0.344	5.211	1.279	0.265	0.463
	TBC1D25	-0.207	3.109	0.513	0.478	0.667
	ACSL4	0.503	6.637	1.435	0.238	0.435
	INPP5A	-0.325	3.814	2.482	0.123	0.285
	GPKOW	-0.719	3.277	6.484	0.015	0.07
	GRIPAP1	0.212	5.729	0.924	0.342	0.542
	FTSJ1	0.543	3.465	4.094	0.049	0.156
	PRR11	0.895	2.32	2.737	0.106	0.258
	REEP1	-2.417	1.778	20.5	0	0.001
	ATP11A	-0.294	7.296	0.92	0.343	0.543
	POLR1A	0.532	5.822	4.88	0.033	0.119
	LAPTM4A	-0.706	5.796	3.891	0.055	0.168
	TTC7A	-0.627	5	4.87	0.033	0.12
	IP6K2	0.302	4.646	2.143	0.151	0.325
	STON1-GTF2A1L	0.012	1.763	0	0.988	0.993
	SRBD1	0.279	3.896	1.17	0.286	0.485
	KIF2A	0.156	4.691	0.428	0.517	0.7
	RASGRP2	-0.307	3.081	0.459	0.502	0.686
	PSME4	0.105	6.496	0.191	0.664	0.806
	IFT80	0.177	3.885	0.24	0.627	0.782
	SIRT2	0.134	4.677	0.231	0.633	0.786
	ERLEC1	0.268	5.27	1.148	0.29	0.489
	PPP2R5B	0.148	3.262	0.164	0.688	0.822
	PYGM	-0.308	1.172	0.324	0.572	0.742
	MAST4	0.385	6.48	1.764	0.191	0.379
	ADGRF5	0.21	7.215	0.336	0.565	0.737
	SDK2	1.081	3.1	3.249	0.079	0.213
	NUP133	-0.203	4.557	0.992	0.325	0.525
	NUCKS1	-0.476	7.238	3.478	0.069	0.195
	VPS35	-0.585	5.407	8.041	0.007	0.043
	DNAJA2	-0.51	5.331	2.793	0.102	0.252
	BCL3	0.013	4.854	0.001	0.976	0.987
	KCNAB2	0.131	5.181	0.093	0.762	0.869
	ABCC9	-0.974	5.932	7.496	0.009	0.051
	CLEC2D	1.341	3.546	13.674	0.001	0.008
	FUNDC1	-0.952	1.15	6.024	0.018	0.081
	MAOB	-1.273	5.405	10.478	0.002	0.021
	RORA	-0.311	7.262	0.528	0.471	0.662
	TGFBR3	-0.583	6.003	2.703	0.108	0.261
	PLA2G10	-0.319	-0.383	0.143	0.707	0.836
	HES2	-2.585	0.708	10.075	0.003	0.023
	ATP1B3	-0.692	4.852	1.992	0.166	0.346
	NEDD4	0.116	5.099	0.145	0.705	0.834
	PIGB	0.725	2.408	7.505	0.009	0.051
	MAPK6	-0.139	6.15	0.089	0.767	0.872
	GNB5	-0.748	4.027	7.098	0.011	0.057
	RAB27A	0.311	5.753	1.508	0.226	0.422
	HDHD5	0.381	4.154	1.326	0.256	0.455
	UFD1	0.891	5.688	9.211	0.004	0.03
	LRP6	0.174	6.516	0.477	0.494	0.68
	PHRF1	-0.524	5.799	2.368	0.131	0.297
	ELP1	0.316	5.82	2.171	0.148	0.321
	NUCB2	0.079	4.943	0.039	0.845	0.919
	PFN2	0.458	2.896	1.468	0.233	0.43
	PTPN3	0.225	6.087	0.613	0.438	0.633
	SPTB	-1.221	3.221	5.141	0.029	0.109
	DAPP1	0.103	2.404	0.052	0.821	0.905
	FGF10	-0.802	1.425	2.516	0.12	0.281
	SLC44A1	-0.102	6.302	0.175	0.678	0.815
	TMEM260	0.913	3.686	8.193	0.007	0.041
	SMG6	0.48	5.297	4.494	0.04	0.136
	EXOC5	-0.265	5.296	0.982	0.327	0.527
	CLTCL1	1.586	3.944	19.629	0	0.002
	FSTL3	0.174	5.777	0.08	0.779	0.879
	DGCR2	-0.484	5.572	2.054	0.159	0.338
	RNF126	-0.057	3.762	0.014	0.905	0.95
	MNT	0.238	4.292	0.4	0.53	0.711
	ZXDC	0.105	5.531	0.207	0.652	0.798
	JMJD6	-0.387	4.561	1.686	0.201	0.391
	POLB	-0.393	2.804	2.451	0.125	0.288
	ST6GALNAC1	0.479	2.143	0.529	0.471	0.662
	WIPI1	1.663	4.814	30.423	0	0
	GBA2	0.271	5.622	1.647	0.206	0.398
	NDST1	-0.743	7.03	5.477	0.024	0.097
	ASNS	1.139	2.907	5.312	0.026	0.103
	AP3M2	0.624	3.476	10.207	0.003	0.023
	ST6GALNAC2	-1.131	1.999	5.117	0.029	0.11
	PABPC1	0.247	8.258	1.031	0.316	0.515
	TESK2	0.087	2.377	0.132	0.718	0.843
	CFAP20	-0.605	2.853	6.56	0.014	0.068
	CSNK2A2	0.258	5.315	1.709	0.198	0.388
	PTPN21	-1.632	4.917	39.585	0	0
	EIF2B3	-0.1	3.244	0.214	0.646	0.795
	CAMK2A	-0.724	0.649	1.286	0.263	0.462
	TCOF1	-0.597	5.089	3.867	0.056	0.169
	CDC42	-0.475	6.562	7.162	0.011	0.056
	OSBPL3	0.32	4.15	0.71	0.404	0.602
	RAD18	0.611	3.261	3.683	0.062	0.18
	ATP2B1	-0.342	5.895	1.38	0.247	0.445
	NCK2	-0.125	3.741	0.206	0.652	0.798
	MAP4K4	0.696	6.842	9.949	0.003	0.024
	MGAT4A	-0.536	5.329	7.975	0.007	0.044
	RPL31	-1.626	6.309	18.501	0	0.002
	WDR1	-0.215	7.278	0.696	0.409	0.606
	SNX13	0.236	5.77	0.913	0.345	0.545
	ARHGAP10	-0.547	4.347	4.691	0.036	0.127
	RPS6KA2	0.409	6.328	1.332	0.255	0.454
	ING3	-0.397	2.69	1.366	0.249	0.447
	VASH1	-1.062	4.292	7.853	0.008	0.046
	LMCD1	-0.025	5.403	0.002	0.961	0.98
	BUD23	-0.468	3.615	2.892	0.096	0.243
	SEL1L	0.189	7.304	0.531	0.47	0.661
	TRIP13	1.012	0.89	2.141	0.151	0.326
	ATP6AP1	0.777	5.305	6.834	0.012	0.063
	TCF3	0.047	3.852	0.018	0.895	0.945
	TRIB2	0.38	4.68	2.43	0.127	0.29
	DAZAP1	0.311	5.663	1.853	0.181	0.365
	MBD3	-1.114	4.551	3.977	0.053	0.162
	HLTF	-0.221	4.056	0.392	0.534	0.714
	FAM50A	-0.059	4.51	0.059	0.809	0.898
	FAM3A	-0.525	4.103	3.074	0.087	0.228
	CPSF1	-0.103	4.949	0.058	0.811	0.899
	MYO3B	1.175	-0.651	3.127	0.084	0.223
	CYBRD1	-0.984	6.203	5.486	0.024	0.097
	CDH19	-0.722	2.278	1.753	0.193	0.38
	PDCD2	0.227	4.044	1.582	0.215	0.409
	SLC6A15	-0.46	0.197	0.199	0.658	0.802
	RDH11	0.613	5.91	4.819	0.034	0.122
	PRKACA	0.932	5.176	14.396	0	0.007
	ADGRL1	-0.357	3.838	0.522	0.474	0.664
	SPP2	-0.192	1.868	0.058	0.91	0.953
	ACTN1	-0.003	7.358	0	0.994	0.997
	ZFYVE26	0.355	5.913	3.479	0.069	0.195
	RPS6KA6	-0.065	1.121	0.018	0.894	0.945
	EPN2	-0.251	4.583	1.494	0.228	0.425
	PTPN18	0.729	5.18	10.093	0.003	0.023
	LIMS2	-0.739	4.4	2.966	0.092	0.237
	SPEG	-0.461	2.395	0.804	0.375	0.575
	LNX1	-0.328	2.544	0.805	0.375	0.575
	ALDH3A2	-0.875	6.512	14.322	0	0.007
	TFRC	-0.655	7.598	2.841	0.099	0.248
	SREBF1	0.453	6.805	0.814	0.372	0.572
	TRPC5	0.395	2.168	0.641	0.428	0.624
	AFF4	0.113	7.601	0.212	0.648	0.796
	UBE2D1	0.026	3.137	0.004	0.951	0.974
	PALS1	-0.364	5.264	1.983	0.167	0.348
	RHOBTB1	-0.669	3.731	4.091	0.05	0.156
	SMC1A	-0.233	6.308	0.948	0.336	0.536
	HSD17B10	-0.689	4.585	5.743	0.021	0.09
	MARK2	0.195	5.272	0.546	0.464	0.657
	HMMR	0.745	1.803	0.714	0.403	0.601
	CHFR	0.262	4.896	1.1	0.3	0.5
	TRHDE	-1.6	1.791	5.688	0.022	0.091
	P4HA2	-0.449	5.079	0.896	0.349	0.55
	FCGR2B	0.084	3.881	0.031	0.861	0.928
	NFATC3	0.054	5.863	0.073	0.789	0.886
	TRNT1	0.571	4.706	8.213	0.006	0.041
	ACADVL	0.324	8.369	1.521	0.224	0.42
	STK10	0.632	5.767	3.295	0.077	0.209
	FBXW11	-0.206	5.223	1.772	0.19	0.377
	ACAP1	0.876	4.075	5.946	0.019	0.084
	CRMP1	0.317	2.601	0.819	0.371	0.571
	EVC	-0.445	4.815	1.069	0.307	0.507
	DERL2	0.474	4.042	2.817	0.101	0.25
	SIDT1	1.336	2.375	12.411	0.001	0.012
	NDE1	0.247	3.925	0.913	0.345	0.545
	IRAG1	0.692	3.865	2.211	0.145	0.317
	TMEM38A	-0.505	1.86	1.895	0.176	0.359
	AP1M1	-0.005	4.801	0	0.987	0.993
	PVR	-0.041	6.723	0.02	0.887	0.941
	XRCC1	-0.088	3.412	0.114	0.738	0.855
	SCARB1	0.126	7.378	0.103	0.75	0.862
	MCM2	-0.852	3.278	1.343	0.253	0.452
	MOV10L1	0.393	-0.528	0.355	0.555	0.729
	PANX2	0.05	1.704	0.008	0.929	0.963
	SELENOO	-0.57	4.478	1.449	0.235	0.433
	TP63	-0.869	1.608	0.928	0.341	0.541
	ALPK1	1.2	5.742	29.174	0	0
	LLGL2	-1.24	5.132	6.102	0.018	0.079
	PDE8A	0.19	5.508	0.896	0.349	0.55
	CLCN4	-0.611	3.161	3.798	0.058	0.173
	NLE1	0.042	2.554	0.02	0.887	0.941
	SDHA	-0.04	6.852	0.02	0.889	0.942
	SMARCE1	0.114	5.607	0.213	0.647	0.795
	GSDMB	1.333	5.168	11.973	0.001	0.013
	KDM5A	-0.069	6.603	0.135	0.716	0.841
	PPP2R3A	-0.15	3.985	0.222	0.64	0.791
	FERMT2	-0.541	6.365	2.592	0.115	0.272
	ABCB11	2.071	7.311	7.641	0.008	0.049
	DHRS9	0.047	1.525	0.009	0.925	0.96
	CD5L	-2.383	2.613	4.316	0.044	0.144
	PTGS2	-1.107	5.96	1.893	0.176	0.359
	IGF2BP2	0.484	3.762	2.181	0.147	0.32
	MAP3K13	0.156	5.361	0.421	0.52	0.702
	ST6GAL1	0.416	8.6	1.214	0.277	0.477
	TBX21	0.055	0.868	0.012	0.915	0.955
	FRY	-0.745	6.403	4.4	0.042	0.14
	PICALM	0.015	6.948	0.003	0.958	0.978
	NSF	0.576	5.088	5.365	0.026	0.101
	GLI2	0.962	1.921	3.994	0.052	0.161
	CLASP1	0.378	6.205	4.354	0.043	0.142
	MRPS34	-1.098	3.389	8.408	0.006	0.038
	NOTCH3	0.419	5.733	0.414	0.524	0.705
	CLNS1A	-0.05	4.863	0.048	0.828	0.909
	TEAD2	-0.049	3.838	0.018	0.893	0.945
	EED	0.898	3.332	8.593	0.005	0.036
	CDHR2	2.724	4.97	13.716	0.001	0.008
	TSG101	0.057	4.15	0.047	0.83	0.909
	NCBP3	0.341	5.562	6.101	0.018	0.079
	ATP2A3	0.494	4.273	0.868	0.357	0.557
	CA12	3.001	4.366	19.097	0	0.002
	MGLL	-0.696	6.893	5.592	0.023	0.094
	NTN4	-1.239	5.161	11.886	0.001	0.014
	BCS1L	0.637	3.211	5.065	0.03	0.112
	NUAK1	-0.141	4.341	0.156	0.695	0.827
	DPP8	0.358	5.028	3.196	0.081	0.217
	SLC24A1	0.129	3.873	0.384	0.539	0.717
	ZNF532	0.778	5.446	12.692	0.001	0.011
	SCARF1	-0.173	4.407	0.105	0.748	0.861
	LMAN1	0.163	7.254	0.279	0.6	0.763
	HACD3	-0.236	5.293	0.729	0.398	0.596
	IPCEF1	0.527	2.548	1.569	0.217	0.411
	ZZEF1	0.327	6.789	2.984	0.092	0.235
	ENO1	0.121	9.094	0.056	0.814	0.901
	SLC12A1	-0.687	-0.362	0.718	0.402	0.6
	MYDGF	-0.895	4.499	6.374	0.015	0.072
	ANO8	-0.224	2.734	0.244	0.624	0.78
	TUBE1	1.162	4.405	8.522	0.006	0.037
	ARHGEF10L	-0.266	6.069	0.45	0.506	0.69
	TXK	0.8	1.489	3.944	0.054	0.164
	WSCD2	-0.981	-0.832	2.002	0.165	0.345
	TACR2	-1.334	-0.13	8.243	0.006	0.04
	ACTR6	-1.036	2.329	7.184	0.01	0.056
	TIPIN	-0.053	1.094	0.034	0.855	0.924
	SRI	-0.166	3.834	0.43	0.515	0.698
	EIF4G3	1.091	6.363	35.593	0	0
	NUP37	0.126	2.004	0.177	0.677	0.814
	SEMA3A	0.489	2.214	0.941	0.338	0.538
	GTSE1	1.024	1.297	2.279	0.139	0.308
	SEMA3C	-0.622	4.297	1.302	0.26	0.459
	TTC38	-0.298	5.61	0.853	0.361	0.561
	ACAT1	-0.59	6.721	2.28	0.139	0.308
	GRAMD4	-0.972	6.449	3.859	0.056	0.169
	CELSR1	-1.179	5.826	3.448	0.07	0.197
	ZNF638	0.494	7.252	3.813	0.058	0.172
	SLC25A40	0.56	2.928	2.711	0.107	0.261
	TIMM21	-0.13	3.052	0.199	0.658	0.802
	ADD2	-1.196	1.218	10.888	0.002	0.018
	RASAL2	-0.454	5.594	3.771	0.059	0.175
	VPS9D1	0.695	3.404	2.828	0.1	0.249
	ZNF37A	0.991	5.253	11.399	0.002	0.016
	MARK3	0.658	6.965	9.954	0.003	0.024
	SLC25A3	-0.266	7.063	0.961	0.332	0.532
	FNDC3B	1.084	7.807	23.956	0	0.001
	FOSL2	-0.447	7.824	1.395	0.244	0.442
	CACNG4	-3.05	1.604	16.877	0	0.004
	FRYL	0.058	6.428	0.096	0.758	0.867
	TMEM131	0.911	5.994	30.993	0	0
	FSCN1	-0.774	3.603	2.069	0.158	0.336
	ACTB	0.072	10.491	0.038	0.847	0.92
	MOCOS	0.674	5.272	2.923	0.095	0.24
	PLD1	0.477	4.573	4.412	0.042	0.14
	ATP12A	-1.034	0.452	0.736	0.396	0.594
	WDR62	0.793	2	2.603	0.114	0.271
	DLG1	0.086	5.771	0.182	0.671	0.811
	RAB7A	0.136	6.378	0.364	0.549	0.725
	BCAP29	-0.447	4.076	1.069	0.307	0.507
	SEC31B	1.006	4.039	12.007	0.001	0.013
	SART3	0.11	5.318	0.332	0.568	0.738
	ARHGAP15	-0.009	3.007	0.001	0.981	0.99
	EXOSC7	-0.368	3.572	2.31	0.136	0.304
	KIFAP3	-0.375	3.746	2.23	0.143	0.314
	MKRN2	0.329	4.611	4.341	0.043	0.143
	MCM6	-0.201	3.385	0.309	0.581	0.748
	REXO2	-0.02	3.896	0.008	0.931	0.964
	RBM7	-0.515	4.102	2.962	0.093	0.237
	RBMS2	0.202	6.18	0.407	0.527	0.708
	BAZ2A	0.543	7.007	5.504	0.024	0.097
	PTPN23	0.177	5	0.202	0.656	0.8
	MLH1	-0.005	4.647	0.001	0.981	0.99
	UNG	-0.613	3.265	5.077	0.03	0.112
	FMO4	-0.731	2.458	2.511	0.121	0.281
	KLHL20	0.277	4.067	1.65	0.206	0.397
	RGS11	-0.6	1.49	1.768	0.191	0.378
	SLC46A1	0.286	5.061	0.381	0.54	0.718
	PLXNA2	-0.872	6.209	6.448	0.015	0.071
	SPAG5	1.537	4.737	10.039	0.003	0.024
	ANKRD13A	0.344	5.749	4.15	0.048	0.153
	TPD52	-0.88	4.609	4.252	0.045	0.148
	ACACB	-0.989	7.691	5.075	0.03	0.112
	TRAF4	-0.313	4.594	0.546	0.464	0.657
	PAG1	1.019	6.563	12.778	0.001	0.011
	GPATCH1	0.009	2.72	0.002	0.966	0.981
	ICAM3	-0.22	3.954	0.218	0.643	0.793
	NT5C2	0.667	5.9	12.261	0.001	0.012
	MCAM	-0.075	5.917	0.027	0.871	0.933
	GPC4	0.022	4.361	0.002	0.965	0.981
	MBNL3	-0.923	6.084	3.568	0.066	0.188
	CAMSAP3	-1.097	3.961	5.287	0.027	0.104
	RAP1GAP	-1.448	4.919	8.001	0.007	0.044
	XAB2	-0.33	4.551	0.838	0.365	0.565
	ARHGEF1	-0.091	5.808	0.048	0.828	0.908
	STXBP2	0.108	4.968	0.075	0.786	0.884
	MAP2K7	-0.643	3.753	3.445	0.071	0.197
	DGKD	-0.078	5.72	0.037	0.848	0.921
	CTTNBP2	-0.318	2.176	0.864	0.358	0.559
	RARB	0.194	2.831	0.74	0.394	0.593
	TOP2B	-0.307	6.829	1.096	0.301	0.501
	TM9SF3	-0.33	6.665	1.247	0.271	0.47
	NFKB2	0.162	5.886	0.119	0.732	0.852
	UBE2T	1.643	0.424	5.87	0.02	0.086
	PPP1R12B	0.045	6.641	0.035	0.852	0.923
	DNAJC10	0.19	5.922	0.58	0.451	0.644
	GTF3C1	-0.112	6.158	0.25	0.62	0.777
	IL4R	0.668	7.062	5.708	0.021	0.09
	USP33	0.138	5.294	0.535	0.468	0.66
	PAK3	-0.242	0.958	0.303	0.585	0.751
	CAPN6	-4.842	2.577	13.468	0.001	0.009
	SNRPA	0.801	3.895	11.891	0.001	0.014
	SPAG6	-1.865	0.704	4.176	0.047	0.151
	EXOSC5	-0.718	2.022	3.187	0.081	0.217
	DYNC1I2	-0.615	5.165	7.298	0.01	0.054
	APBB1IP	0.967	4.718	8.819	0.005	0.034
	LRCH4	0.29	4.707	0.623	0.434	0.629
	FAM76B	0.65	4.104	4.352	0.043	0.142
	SIRT6	-0.444	2.231	0.788	0.38	0.579
	POLD3	0.761	3.851	7.667	0.008	0.048
	ACTN2	0.138	5.604	0.022	0.884	0.94
	CAPZB	0.582	6.681	7.99	0.007	0.044
	GPR137B	0.848	3.212	9.637	0.003	0.026
	NAALAD2	-0.624	1.897	0.513	0.478	0.667
	JADE1	-0.702	5.171	9.587	0.003	0.027
	SLC25A43	0.229	3.111	1.165	0.287	0.486
	UBE2A	-0.063	4.08	0.102	0.751	0.862
	FGFR1	-0.439	5.886	1.347	0.252	0.451
	FBLN1	-0.703	6.318	1.071	0.307	0.507
	ITGA8	-1.043	4.613	4.322	0.044	0.144
	CST7	0.281	2.394	0.312	0.58	0.747
	MAP2	-0.721	4.302	4.031	0.051	0.16
	PIAS2	1.081	5.427	13.983	0.001	0.008
	AMPH	2.609	1.364	22.505	0	0.001
	ARAF	-0.051	4.696	0.024	0.876	0.936
	MCCC1	-0.263	4.856	1.171	0.285	0.485
	LAMP3	0.335	6.097	0.143	0.707	0.836
	FAP	1.849	2.736	8.059	0.007	0.043
	NEBL	-0.724	6.336	1	0.323	0.523
	ACER3	0.124	5.261	0.324	0.572	0.742
	UBE2K	-0.037	5.019	0.016	0.899	0.947
	PIK3C3	0.191	5.171	0.675	0.416	0.613
	N4BP2	0.103	5.055	0.118	0.733	0.852
	TIGAR	0.292	3.275	0.971	0.33	0.53
	TULP3	1.178	4.023	12.658	0.001	0.011
	SYNJ2	0.468	4.351	2.329	0.135	0.302
	ADCY2	-1.118	0.527	2.449	0.125	0.288
	PPP2R5C	0.295	6.2	1.594	0.214	0.407
	RBFOX1	-1.007	0.621	1.044	0.313	0.512
	GNB1	-0.1	6.918	0.249	0.62	0.777
	EDN1	0.022	4.24	0.002	0.965	0.981
	MLLT10	0.667	5.23	10.643	0.002	0.02
	ZCWPW1	-0.275	1.792	0.842	0.364	0.564
	ADCYAP1R1	-0.519	0.511	0.857	0.36	0.56
	P2RY10	0.408	1.039	0.355	0.554	0.728
	ITM2A	-1.809	2.525	22.454	0	0.001
	NRDC	0.125	6.426	0.51	0.479	0.668
	VDAC3	-0.333	4.822	0.795	0.378	0.577
	PCM1	0.127	7.368	0.177	0.676	0.814
	TNRC6C	0.203	4.86	0.922	0.342	0.543
	CBFA2T2	-0.175	4.568	0.444	0.509	0.693
	BRINP1	0.237	-0.424	0.107	0.745	0.859
	ITCH	0.547	6.228	5.324	0.026	0.103
	PKD2L2	0.524	-0.378	1.528	0.223	0.418
	TP53INP2	0.058	5.103	0.039	0.844	0.918
	SDF4	-0.821	5.886	5.077	0.03	0.112
	MYH7B	-1.14	1.207	4.371	0.043	0.142
	TP73	-0.214	0.841	0.084	0.774	0.876
	TOLLIP	-0.535	5.035	2.352	0.133	0.299
	UBE2D4	-0.111	3.584	0.297	0.589	0.754
	RUNX1T1	0.542	3.21	2.2	0.146	0.318
	THOC1	0.77	4.516	9.369	0.004	0.029
	FKBP7	-0.317	2.077	0.953	0.335	0.535
	OSBPL6	-0.428	2.959	1.224	0.275	0.475
	SLC1A3	0.719	5.68	3.225	0.08	0.214
	XRCC5	-0.206	6.884	0.67	0.418	0.615
	LXN	0.793	2.35	4.218	0.046	0.149
	SP140	1.252	2.559	8.36	0.006	0.039
	MKNK1	0.93	5.104	15.628	0	0.005
	TNS1	-0.139	9.193	0.13	0.72	0.844
	REXO1	-0.597	4.318	1.611	0.211	0.404
	SAR1A	-0.496	6.005	6.844	0.012	0.063
	CDC14A	0.039	2.956	0.021	0.885	0.94
	RAPGEF3	-1.179	4.09	10.662	0.002	0.02
	CEACAM1	2.835	5.072	61.032	0	0
	SENP1	0.728	3.818	9.259	0.004	0.03
	CIC	-0.025	6.086	0.003	0.956	0.977
	LIPE	-0.456	1.12	0.994	0.324	0.524
	FDFT1	0.475	6.287	2.458	0.124	0.287
	PAFAH1B3	-0.896	1.054	3.255	0.078	0.212
	OPHN1	-0.279	4.667	0.607	0.44	0.635
	AFM	4.977	5.889	19.869	0	0.002
	KIF22	-0.089	3.885	0.087	0.769	0.873
	CARMIL1	-0.55	4.503	4.556	0.039	0.133
	PGM1	-0.572	6.117	4.125	0.049	0.154
	DDX1	-0.528	5.222	3.712	0.061	0.179
	DNM2	0.454	7.345	2.473	0.123	0.286
	EPB41L2	-0.24	6.184	0.893	0.35	0.551
	RIMS1	-1.158	0.644	4.467	0.041	0.137
	MOXD1	0.53	3.437	0.993	0.325	0.525
	STX7	-0.155	5.415	0.427	0.517	0.7
	RABL2B	-0.017	3.543	0.005	0.943	0.969
	KEAP1	-0.213	4.657	0.509	0.48	0.668
	DDX43	-0.089	-0.042	0.023	0.88	0.938
	PTPRH	2.183	4.388	16.659	0	0.004
	DCT	-1.087	-0.484	1.819	0.185	0.37
	SLC35C2	-0.163	4.433	0.235	0.63	0.784
	CRYBG3	0.168	6.273	0.416	0.522	0.704
	EPHA6	0.417	-0.041	0.344	0.561	0.733
	SCTR	-0.434	2.182	0.691	0.411	0.607
	RFX3	-0.61	3.584	5.346	0.026	0.102
	RIF1	0.017	6.456	0.005	0.945	0.971
	RAB21	-0.33	6.008	1.624	0.21	0.402
	SLC4A4	-1.168	5.193	9.85	0.003	0.025
	SMARCA2	-0.174	7.083	0.387	0.538	0.716
	SESN1	-0.765	4.405	9.569	0.004	0.027
	MID2	0.254	4.079	1.051	0.311	0.511
	COL5A3	-0.304	4.438	0.406	0.528	0.708
	SRCAP	0.553	6.035	2.945	0.094	0.238
	PUM3	0.698	4.587	5.467	0.024	0.098
	CPB2	-0.843	7.751	2.01	0.164	0.344
	KCNN2	0.489	0.645	0.782	0.381	0.581
	CNOT4	0.72	4.587	10.349	0.003	0.022
	PSEN1	0.021	6.397	0.013	0.908	0.952
	CPOX	-0.555	3.49	3.566	0.066	0.189
	CLDND1	-0.159	4.654	0.205	0.653	0.798
	MOK	-0.611	2.766	3.069	0.087	0.228
	HSP90AA1	-1.622	8.878	7.155	0.011	0.056
	RBL1	0.279	2.721	0.959	0.333	0.533
	DLGAP4	0.577	5.432	3.514	0.068	0.192
	IGSF9B	-0.87	2.928	4.184	0.047	0.151
	CFHR2	2.368	5.169	8.278	0.006	0.04
	NDC80	1.502	1.543	2.873	0.098	0.245
	AP4E1	0.49	3.969	5.547	0.023	0.095
	RSBN1	-0.271	4.369	1.362	0.25	0.448
	MAGI3	-0.945	5.686	15.038	0	0.006
	CXCL2	-0.983	6.343	2.504	0.121	0.282
	COL4A4	-2.041	4.944	22.155	0	0.001
	TCF7	-0.281	4.014	1.202	0.279	0.479
	OSTM1	-0.387	4.435	2.655	0.111	0.266
	IMPG2	0.297	-0.023	0.362	0.551	0.726
	PCNP	-0.37	5.234	1.343	0.253	0.452
	EXD2	-0.51	3.664	8.948	0.005	0.032
	ARG2	-0.368	2.713	0.351	0.557	0.73
	MEF2C	-0.001	4.582	0	0.996	0.998
	PTPRC	0.321	6.808	0.666	0.419	0.616
	CACNA1S	-3.053	-0.395	6.12	0.018	0.079
	PKP1	0.918	2.478	1.155	0.289	0.488
	UBA5	0.024	5.011	0.01	0.922	0.958
	STK17B	-0.833	5.347	5.7	0.022	0.091
	CDC14B	-0.37	4.559	2.047	0.16	0.338
	ZNF510	0.313	3.732	1.373	0.248	0.446
	LRP2	-0.708	5.9	1.323	0.257	0.455
	ZNF506	0.635	4.511	9.369	0.004	0.029
	JMJD4	-0.321	3.121	0.739	0.395	0.594
	DUSP12	-0.286	2.276	1.734	0.195	0.383
	AACS	0.232	4.176	0.661	0.421	0.617
	DELE1	0.539	5.322	12.115	0.001	0.013
	CADPS2	-0.364	4.893	3.083	0.086	0.227
	PCDHB4	-0.126	0.662	0.142	0.708	0.836
	PCDHA6	-0.755	-0.336	1.303	0.26	0.459
	PCDHGA2	-1.613	1.777	17.99	0	0.003
	IFT25	0.597	2.392	4.062	0.05	0.158
	PHLPP1	-0.805	4.32	8.848	0.005	0.033
	ATP8B1	-0.085	4.957	0.297	0.589	0.754
	IL12RB2	0.473	2.339	1.932	0.172	0.355
	SMARCD3	1.27	3.606	15.504	0	0.005
	WDR70	0.289	4.306	2.2	0.146	0.318
	FYB1	1.076	5.357	6.993	0.011	0.06
	STRADB	0.215	4.2	0.536	0.468	0.66
	BZW1	-0.666	6.829	3.785	0.058	0.174
	PGR	-1.028	2.556	5.266	0.027	0.105
	C1QTNF3	-0.215	2.332	0.335	0.566	0.737
	ME2	0.57	4.767	6.212	0.017	0.076
	C5orf22	0.647	3.777	3.884	0.055	0.168
	CCNT2	0.702	5.634	4.713	0.036	0.126
	FAM135A	0.214	4.849	0.407	0.527	0.708
	COL19A1	-0.432	0.037	0.58	0.45	0.644
	EPB41L3	0.119	5.297	0.158	0.693	0.826
	COBLL1	0.259	6.466	0.775	0.384	0.583
	DLG3	0.34	3.705	0.573	0.453	0.647
	SERTAD4	-1.113	0.842	2.6	0.114	0.272
	TRAF5	0.983	3.725	16.863	0	0.004
	MRPL22	0.001	2.479	0	0.997	0.999
	GEMIN5	-0.231	4.011	1.648	0.206	0.398
	NFE2L1	-0.166	7.483	0.378	0.542	0.72
	GSK3B	-0.061	6.036	0.123	0.728	0.849
	ITGB5	-0.488	6.109	2.755	0.104	0.256
	ERC1	0.179	6.367	0.721	0.401	0.599
	XPO1	0.821	6.935	5.037	0.03	0.113
	RNF13	-0.607	5.28	2.934	0.094	0.239
	TRPM3	0.01	1.764	0.001	0.98	0.989
	PALB2	0.894	3.405	14.346	0	0.007
	DOP1A	0.383	5.127	2.744	0.105	0.257
	LYRM2	-0.578	4.035	9.04	0.004	0.031
	BCKDHB	-0.183	3.954	0.361	0.551	0.726
	KAT6A	0.058	7.184	0.079	0.78	0.88
	TUT7	0.855	6.523	14.458	0	0.007
	ULK2	-0.667	3.563	5.957	0.019	0.083
	GRHL2	-0.347	3.526	0.346	0.56	0.732
	TNPO1	0.043	6.367	0.025	0.875	0.936
	PLOD1	0.727	6.137	2.02	0.163	0.342
	P2RX5	2.88	1.753	22.053	0	0.001
	ITGAE	-1.063	2.435	18.007	0	0.003
	DIS3	0.025	5.218	0.011	0.917	0.956
	PIBF1	0.125	3.846	0.147	0.703	0.833
	TDRD3	-0.745	4.295	4.625	0.037	0.13
	NUFIP1	0.206	2.159	0.41	0.525	0.707
	PDS5B	0.119	5.424	0.168	0.684	0.819
	OXCT1	0.246	2.88	0.241	0.626	0.781
	RRAGB	-0.109	2.96	0.314	0.578	0.746
	CYLD	-0.046	6.17	0.035	0.852	0.923
	SLC27A5	-0.415	6.04	0.99	0.325	0.525
	ZNF324	-0.27	3.605	0.541	0.466	0.658
	ZNF671	0.436	2.455	3.976	0.053	0.162
	ZNF416	-0.426	0.899	1.782	0.189	0.376
	ZNF586	0.755	4.144	16.568	0	0.004
	ZNF446	-0.512	2.73	1.893	0.176	0.359
	ZNF264	-0.152	5.396	0.802	0.376	0.575
	RPS5	-1.021	6.227	6.135	0.017	0.078
	FAT1	0.534	7.79	3.44	0.071	0.197
	YTHDC1	-0.196	5.902	0.467	0.498	0.684
	CHMP2B	-0.326	4.773	0.65	0.425	0.621
	SMAP2	0.703	6.419	4.383	0.042	0.141
	PPIE	-0.056	4.015	0.092	0.763	0.87
	ZMPSTE24	-0.353	4.667	1.413	0.241	0.439
	STARD7	-0.548	6.21	4.545	0.039	0.133
	NOA1	-0.187	3.436	0.31	0.581	0.748
	REST	0.206	5.623	0.776	0.383	0.583
	HAL	0.328	7.083	0.432	0.515	0.698
	SSH1	0.131	6.201	0.252	0.619	0.776
	GSTP1	-0.745	5.737	2.012	0.163	0.344
	APLP2	-0.706	8.589	7.788	0.008	0.046
	FAM234B	-0.295	2.914	1.721	0.197	0.386
	SLCO1A2	-3.035	2.617	12.976	0.001	0.01
	WBP11	0.681	5.218	6.578	0.014	0.068
	EIF3I	-0.306	5.621	1.653	0.206	0.397
	COL16A1	0.635	5.369	0.782	0.382	0.581
	TXLNA	0.07	6.282	0.109	0.743	0.857
	APOB	5.965	12.832	50.834	0	0
	NCOA1	0.396	6.181	4.728	0.035	0.125
	AGBL5	0.106	3.067	0.168	0.684	0.819
	EFR3B	-1.831	2.687	15.979	0	0.004
	KIF3C	-0.079	1.976	0.057	0.812	0.899
	RAB10	-0.332	5.759	1.818	0.185	0.37
	GCKR	2.585	5.626	16.172	0	0.004
	HADHA	-0.467	7.026	3.953	0.053	0.164
	MAPRE3	0.339	3.371	1.454	0.235	0.432
	CAD	0.444	4.788	1.464	0.233	0.431
	CD59	-0.556	8.28	4.93	0.032	0.117
	CD82	0.219	5.042	0.229	0.635	0.787
	BCORL1	0.557	3.433	2.422	0.127	0.291
	ATRX	-0.029	6.804	0.009	0.926	0.961
	AK6	-0.617	2.445	2.96	0.093	0.237
	FCN1	-0.716	3.932	1.289	0.263	0.461
	MYNN	-0.413	3.538	1.425	0.239	0.437
	MECOM	0.118	5.182	0.107	0.745	0.859
	SCAMP1	-0.136	4.406	0.114	0.737	0.854
	PREP	0.129	4.081	0.483	0.491	0.677
	HACE1	0.376	3.521	2.578	0.116	0.274
	SEH1L	-0.404	4.544	3.616	0.064	0.185
	WDR47	-0.333	3.286	1.873	0.178	0.362
	WDFY1	0.815	5.725	14.858	0	0.006
	OVGP1	1.558	2.31	12.05	0.001	0.013
	SLC25A24	-0.585	4.191	3.751	0.06	0.176
	MAP3K4	0.223	4.933	1.41	0.242	0.44
	PILRA	0.764	3.225	3.496	0.069	0.193
	IGSF9	-0.578	2.004	1.391	0.245	0.442
	ABCB1	-3.447	5.018	22.121	0	0.001
	ZNF213	-0.563	2.386	0.873	0.356	0.556
	AKR1B1	-1.297	4.729	7.199	0.01	0.056
	CPNE3	-0.739	5.683	5.883	0.02	0.085
	RRN3	-0.215	5.027	0.979	0.328	0.528
	CTTN	0.091	6.78	0.123	0.728	0.848
	WNT11	-2.639	1.362	14.015	0.001	0.008
	MTIF2	0.557	4.572	3.071	0.087	0.228
	DDHD2	0.246	4.728	0.687	0.412	0.609
	TTC39A	-0.626	3.502	2.658	0.111	0.266
	EPS15	0.071	6.087	0.084	0.773	0.876
	ORC1	1.36	0.984	3.842	0.057	0.17
	MGST2	-0.373	3.769	1.446	0.236	0.433
	CHERP	-0.273	4.074	0.552	0.462	0.654
	ATG16L1	0.224	4.688	1.762	0.192	0.379
	USP40	-0.374	5.312	1.984	0.166	0.348
	POMGNT1	0.11	5.172	0.208	0.651	0.798
	RAD54L	1.385	0.739	4.036	0.051	0.159
	MAST2	0.01	4.958	0.001	0.972	0.985
	DNAJA1	-1.24	6.425	9.156	0.004	0.03
	B4GALT1	0.444	7.016	2.639	0.112	0.268
	CHMP5	-0.856	4.147	7.988	0.007	0.044
	NFX1	0.491	5.898	7.656	0.008	0.048
	DIMT1	0.321	3.483	1.664	0.204	0.395
	IPO11	-0.349	3.622	2.446	0.125	0.288
	FOLH1	-0.444	1.879	0.792	0.378	0.578
	EIF2AK1	0.198	5.406	0.999	0.323	0.523
	EPDR1	-0.234	4.005	0.538	0.467	0.66
	SNX10	-0.394	5.447	0.59	0.447	0.641
	SEPHS1	-0.073	4.129	0.168	0.684	0.82
	MRPL28	-0.582	3.553	3.682	0.062	0.18
	ITPKC	-1.487	6.007	11.606	0.001	0.015
	CEACAM6	0.885	6.401	0.852	0.361	0.561
	FAT2	-0.475	3.237	0.259	0.613	0.773
	RBM22	0.478	4.504	6.608	0.014	0.067
	TMED2	0.163	6.602	0.334	0.566	0.737
	ERO1B	0.583	4.763	2.912	0.095	0.241
	ZFAND6	0.24	5.069	0.754	0.39	0.589
	HSD17B2	-0.515	4.114	1.146	0.291	0.49
	TXLNG	-0.056	4.173	0.052	0.82	0.904
	LAT2	0.227	3.532	0.245	0.623	0.779
	HUWE1	0.362	8.367	3.153	0.083	0.22
	ZW10	0.463	3.5	2.99	0.091	0.235
	ALG9	0.441	3.884	4.84	0.033	0.121
	MYBPC2	-0.292	1.472	0.039	0.845	0.919
	NOX4	-0.816	0.1	2.35	0.133	0.3
	ACOX3	-0.057	3.757	0.055	0.816	0.902
	MTMR2	0.453	4.538	2.724	0.106	0.259
	PPP1R15A	-1.256	7.349	7.823	0.008	0.046
	HSD17B14	-0.894	1.593	3.3	0.076	0.208
	TRIP6	-0.618	4.271	1.934	0.172	0.355
	ACHE	-0.714	1.719	0.809	0.374	0.573
	FTL	-0.104	10.661	0.061	0.805	0.895
	SRRT	-0.17	5.438	0.329	0.57	0.739
	BAX	0.133	3.544	0.141	0.709	0.836
	NLK	0.589	3.777	6.381	0.015	0.072
	PIGS	0.579	4.094	6.69	0.013	0.066
	ADAMTS2	2.324	5.681	27.284	0	0
	ATXN7L3	-0.055	4.832	0.025	0.874	0.935
	PGS1	0.682	5.329	3.353	0.074	0.204
	PSMC5	-0.268	5.014	1.959	0.169	0.351
	UIMC1	0.49	4.348	8.294	0.006	0.04
	CETP	0.946	0.677	3.892	0.055	0.168
	MMP2	2.375	7.949	8.902	0.005	0.033
	LPCAT2	-0.485	3.3	1.68	0.202	0.392
	GNAO1	-0.476	3.607	0.799	0.377	0.576
	OGFOD1	0.746	4.575	7.611	0.009	0.049
	SH3BP2	0.521	6.316	2.338	0.134	0.301
	NOP14	-0.161	5.075	0.271	0.606	0.767
	ADD1	0.127	7.271	0.439	0.511	0.694
	L2HGDH	-0.155	2.701	0.278	0.601	0.763
	TXNDC16	-0.595	2.73	3.166	0.082	0.219
	RTRAF	0.373	4.836	1.603	0.213	0.406
	NID2	2.114	4.022	31.753	0	0
	GMCL1	-0.324	3.401	1.62	0.21	0.403
	SF3B2	-0.392	6.654	1.851	0.181	0.366
	KLHL42	0.267	4.455	2.514	0.12	0.281
	GNAS	0.066	7.828	0.098	0.755	0.865
	DNM1L	0.291	5.253	1.216	0.276	0.476
	PHACTR3	-0.607	1.907	1.148	0.29	0.489
	ERGIC2	0.323	4.63	0.81	0.373	0.573
	TFAP2C	-1.949	1.374	5.761	0.021	0.089
	AURKA	0.386	2.484	0.327	0.57	0.74
	CASS4	-0.63	3.234	1.461	0.234	0.431
	PIR	-0.28	2.313	0.517	0.476	0.666
	AAMDC	-1.652	2.092	24.155	0	0.001
	RFX2	-1.126	3.147	9.032	0.004	0.032
	METTL2A	-0.555	3.163	9.951	0.003	0.024
	SULT2B1	-3.012	-0.02	18.593	0	0.002
	ALG6	0.468	2.309	1.924	0.173	0.356
	CNOT3	0.799	4.429	6.116	0.018	0.079
	GP6	0.274	0.629	0.354	0.555	0.729
	PTPN4	-0.201	4.447	0.564	0.457	0.65
	DDX18	-0.343	5.406	1.635	0.208	0.4
	KHSRP	-0.318	5.612	1.243	0.271	0.471
	GNA11	-0.8	5.21	3.849	0.056	0.17
	ASAP3	0.09	4.59	0.094	0.76	0.869
	EDEM2	-0.167	4.034	0.299	0.588	0.753
	DNMT3B	-1.649	2.233	4.328	0.044	0.144
	REM1	-0.983	-0.046	2.991	0.091	0.235
	TPX2	0.6	3.693	0.451	0.505	0.69
	FER1L4	2.048	3.368	12.433	0.001	0.012
	PDRG1	-0.779	1.857	5.041	0.03	0.113
	EPB41L1	-0.414	4.352	1.347	0.252	0.451
	SLC15A1	0.393	3.645	0.343	0.561	0.734
	DOCK9	-0.026	6.737	0.018	0.895	0.945
	ANKRD10	0.136	5.771	0.689	0.411	0.608
	TGDS	0.337	2.879	0.953	0.335	0.535
	DOCK3	-0.542	1.04	1.096	0.301	0.501
	C3orf18	-0.126	1.544	0.104	0.749	0.861
	COQ9	0.38	4.904	1.865	0.179	0.363
	KIF9	-0.84	1.707	8.686	0.005	0.035
	ARHGAP28	0.137	2.73	0.052	0.82	0.904
	CRLS1	-0.147	4.757	0.206	0.652	0.798
	PPP1R13B	-0.41	4.954	2.558	0.117	0.276
	ATRN	0.316	6.537	2.211	0.145	0.317
	SMOX	1.388	2.945	4.583	0.038	0.132
	SIGLEC1	0.504	4.795	0.861	0.359	0.559
	FKBP1A	0.444	6.252	3.45	0.07	0.197
	NSFL1C	-0.117	5.078	0.33	0.569	0.739
	SLC4A11	0.682	0.35	0.867	0.357	0.558
	DNAAF9	-0.022	4.782	0.009	0.923	0.959
	ZNF343	0.953	3.418	26.013	0	0
	EBF4	0.152	1.992	0.127	0.724	0.846
	CPXM1	3.022	2.198	9.135	0.004	0.031
	MAVS	0.15	6.748	0.207	0.652	0.798
	LZTS3	-0.903	3.629	5.232	0.027	0.106
	F11	-0.513	5.592	1.159	0.288	0.487
	XRN2	-0.106	5.638	0.209	0.65	0.797
	KIZ	1.041	3.666	17.454	0	0.003
	DYNLL1	-0.97	4.492	11.634	0.001	0.015
	TESC	0.035	1.183	0.007	0.935	0.966
	SNX5	0.235	5.267	1.564	0.218	0.412
	RPL6	-0.022	7.629	0.006	0.941	0.969
	SIRPG	1.54	-0.741	5.009	0.031	0.114
	MAPKAPK5	0.146	4.921	0.888	0.352	0.552
	P2RX7	0.62	3.72	2.696	0.108	0.262
	ESF1	-0.091	3.982	0.046	0.831	0.91
	RBBP9	0.378	3.998	1.95	0.17	0.353
	ANAPC5	0.779	6.096	36.12	0	0
	SLC23A2	0.611	7.054	2.395	0.129	0.294
	SLC8B1	0.034	5.199	0.007	0.934	0.965
	TMEM230	0.279	4.589	0.814	0.372	0.572
	DZANK1	0.407	1.585	1.862	0.18	0.364
	KDM2B	-0.415	4.447	2.715	0.107	0.26
	CFAP61	-1.435	0.076	3.661	0.063	0.182
	TASP1	0.106	2.845	0.257	0.615	0.774
	OAS1	1.229	4.556	5.894	0.02	0.085
	GCN1	-0.169	6.653	0.275	0.603	0.765
	RPLP0	-0.149	8.39	0.162	0.69	0.823
	PXN	0.289	6.152	0.636	0.43	0.625
	SIRT4	0.234	-0.395	0.186	0.669	0.809
	RPH3A	-1.383	-0.299	2.143	0.151	0.325
	KIF16B	-0.131	4.994	0.289	0.594	0.758
	TRMT6	-0.031	2.982	0.011	0.915	0.955
	CHGB	-3.09	0.205	5.882	0.02	0.085
	PEBP1	-1.069	7.356	19.328	0	0.002
	TBX5	0.258	2.967	0.271	0.606	0.767
	BRAP	0.267	3.943	1.478	0.231	0.428
	ERP29	-1.122	5.479	19.982	0	0.002
	NOS1	-1.099	1.417	2.603	0.114	0.271
	FUS	0.233	6.381	1.697	0.2	0.389
	IGBP1	-0.244	3.783	1.209	0.278	0.477
	FXYD5	0.786	4.172	9.199	0.004	0.03
	ZNF302	0.185	4.049	0.348	0.558	0.731
	GRAMD1A	0.731	5.693	2.615	0.113	0.27
	FXYD3	-1.288	3.002	2.849	0.099	0.247
	HEPH	0.751	3.33	4.065	0.05	0.158
	CDIP1	-0.013	3.858	0.002	0.962	0.98
	CMTM1	0.831	0.1	3.815	0.058	0.172
	GANAB	-0.432	7.206	2.158	0.149	0.323
	GMIP	0.485	4.03	1.292	0.262	0.461
	RBM41	0.686	4.366	4.112	0.049	0.155
	BIRC5	-0.097	2.32	0.012	0.913	0.954
	LAG3	0.894	1.198	3.111	0.085	0.224
	MLF2	-0.495	5.76	2.893	0.096	0.243
	OTUB2	-1.717	1.436	13.19	0.001	0.01
	DDX24	-0.038	6.932	0.022	0.883	0.94
	ZBTB25	0.879	4.714	20.85	0	0.001
	NECAP1	0.447	4.675	8.536	0.006	0.037
	ARHGAP4	0.259	4.386	0.215	0.645	0.794
	ANKRD24	-0.299	1.965	0.189	0.666	0.807
	DHX32	0.15	4.408	0.217	0.644	0.793
	RCOR1	-0.11	5.343	0.461	0.501	0.686
	GPATCH2L	0.586	6.237	12.636	0.001	0.011
	LTBP4	-2.792	5.812	20.795	0	0.001
	BLVRB	-0.696	4.652	2.918	0.095	0.241
	SLC9A1	0.087	4.445	0.037	0.849	0.921
	SPTLC1	-0.119	5.01	0.498	0.485	0.672
	PAPOLA	-0.082	6.874	0.069	0.793	0.888
	CCNK	0.774	4.637	12.299	0.001	0.012
	PCBP4	-0.21	3.047	0.33	0.569	0.739
	RGS1	-0.554	5.074	0.914	0.345	0.545
	YPEL3	0.536	4.054	1.882	0.177	0.361
	MRPS33	-1.113	2.399	9.41	0.004	0.028
	NDUFB2	-1.487	3.716	18.28	0	0.002
	NUDC	-1.375	5.249	13.561	0.001	0.009
	MAEA	-0.429	4.756	2.604	0.114	0.271
	ICAM1	-0.393	8.908	0.44	0.511	0.694
	STRN4	-0.13	5.198	0.162	0.69	0.823
	IRAK3	1.142	6.518	6.346	0.016	0.073
	LYZ	-2.674	6.904	26.81	0	0
	MUL1	-0.795	3.884	7.523	0.009	0.05
	TFAP4	-0.614	2.094	2.43	0.127	0.29
	PDCD7	0.018	3.605	0.01	0.923	0.959
	SPG21	0.321	4.876	1.979	0.167	0.348
	FETUB	-1.209	2.99	0.712	0.404	0.601
	DNAJB11	0.289	5.148	1.437	0.237	0.435
	P3H2	-2.206	3.898	26.002	0	0
	THPO	0.13	1.765	0.055	0.816	0.902
	CHRD	0.324	5.515	0.563	0.457	0.651
	FLT3LG	-0.385	0.945	0.743	0.394	0.592
	RAB11FIP3	-0.958	5.161	3.026	0.089	0.232
	GNPTG	-0.726	4.723	6.693	0.013	0.066
	ZNF268	-0.548	3.855	8.511	0.006	0.037
	GOLGA3	-0.187	6.837	0.382	0.54	0.718
	PABPC4	0.064	6.496	0.091	0.764	0.87
	CD209	0.841	1.861	2.397	0.129	0.294
	CERS4	-1.135	3.886	11.791	0.001	0.014
	MCOLN1	-0.629	3.287	2.399	0.129	0.294
	USP48	0.318	5.518	2.429	0.127	0.29
	EFNB1	-0.669	4.6	2.666	0.11	0.265
	PDPR	0.368	5.54	2.58	0.116	0.274
	AARS1	0.119	6.608	0.09	0.766	0.871
	GLG1	-0.074	7.066	0.203	0.655	0.8
	KIF4A	1.208	1.853	1.876	0.178	0.362
	TNRC6A	0.862	6.451	15.01	0	0.006
	PLEKHG2	0.029	5.484	0.003	0.954	0.976
	NAT14	-0.883	1.228	2.137	0.151	0.326
	PITPNM2	-0.128	5.041	0.152	0.698	0.83
	EXOC1	0.064	4.476	0.085	0.772	0.875
	RBM27	0.136	4.693	0.176	0.677	0.814
	OSBPL8	0.034	6.26	0.013	0.911	0.953
	DTX2	0.642	3.801	1.443	0.236	0.433
	NLRC4	0.292	2.573	0.356	0.554	0.728
	PUS7	0.493	3.636	2.326	0.135	0.302
	LAMB4	0.663	-0.337	1.071	0.307	0.507
	NRCAM	2.69	3.885	40.889	0	0
	LAMB1	0.832	7.791	8.188	0.007	0.041
	SLC26A4	2.14	1.263	5.411	0.025	0.1
	DLD	-0.442	5.135	1.943	0.171	0.354
	WDR7	0.367	5.042	3.787	0.058	0.174
	TXNL1	-0.104	4.568	0.129	0.722	0.845
	IL5RA	-1.799	0.782	6.916	0.012	0.061
	ABCC6	-0.552	5.875	1.506	0.227	0.423
	CMTM6	-0.199	6.138	0.519	0.475	0.665
	ITGA6	-1.028	5.932	9.13	0.004	0.031
	RAPGEF4	0.491	3.875	3.936	0.054	0.165
	MAP3K20	-0.18	6.153	0.269	0.606	0.767
	SMPX	1.795	0.72	1.791	0.188	0.374
	FH	0.094	5.537	0.104	0.748	0.861
	SEL1L3	0.302	5.452	0.795	0.378	0.577
	TF	2.123	10.606	9.152	0.004	0.03
	CDV3	-0.15	6.979	0.315	0.578	0.746
	MYO15A	-0.04	1.583	0.007	0.932	0.964
	ALKBH5	-0.376	5.824	2.856	0.098	0.246
	APOH	3.154	9.176	18.8	0	0.002
	NLRP1	0.495	5.374	2.518	0.12	0.28
	PITPNM3	-0.843	3.681	1.491	0.229	0.426
	SPAG7	-0.817	4.03	7.744	0.008	0.047
	ORC6	0.943	0.99	2.431	0.127	0.29
	ZFHX4	0.41	4.772	0.784	0.381	0.58
	ZC3HC1	-0.323	2.535	1.531	0.223	0.418
	ESR1	-0.229	3.833	0.175	0.678	0.815
	RGS17	0.916	0.916	3.917	0.054	0.166
	ANGPT2	0.619	3.383	3.747	0.06	0.176
	TMEM101	-0.395	3.005	1.984	0.166	0.348
	CD200	1.112	1.72	3.272	0.078	0.211
	CCDC80	0.717	6.639	0.903	0.348	0.548
	PSME1	-0.385	5.288	3.742	0.06	0.177
	PPP2R3C	-0.256	3.021	1.066	0.308	0.508
	HAUS4	-0.451	3.191	2.723	0.106	0.26
	JPH4	-2.521	0.384	33.809	0	0
	MYH7	7.09	7.005	15.2	0	0.006
	SLC7A8	0.321	4.306	0.342	0.562	0.734
	OSGEP	0.226	4.075	0.765	0.387	0.586
	SLC22A17	-0.533	1.935	1.773	0.19	0.377
	RNF31	0.029	4.62	0.01	0.919	0.957
	SCFD1	0.764	5.954	8.773	0.005	0.034
	G2E3	0.148	3.301	0.25	0.62	0.777
	HECTD1	-0.113	7.754	0.363	0.55	0.725
	HNRNPC	-0.222	7.804	0.866	0.357	0.558
	RPGRIP1	0.189	-0.093	0.163	0.689	0.823
	SUPT16H	-0.424	5.866	2.791	0.102	0.253
	TOX4	-0.031	5.472	0.039	0.844	0.919
	GEMIN2	-0.37	1.137	1.538	0.222	0.417
	TGM1	-0.055	1.136	0.011	0.917	0.956
	TINF2	0.002	4.918	0	0.992	0.995
	SEMA6A	-0.754	4.694	5.803	0.021	0.088
	TRPM7	0.363	6.727	2.047	0.16	0.338
	TYRO3	-1.088	3.029	5.566	0.023	0.095
	WDR76	0.727	2.035	3.502	0.068	0.193
	CAPN3	0.462	5.377	0.977	0.329	0.529
	SNAP23	0.039	5.276	0.01	0.919	0.957
	TBX15	-0.14	4.201	0.044	0.836	0.913
	PHGDH	-0.697	3.674	3.058	0.088	0.229
	COL9A3	-1.036	0.072	2.153	0.15	0.324
	EZR	-2.32	7.926	25.51	0	0
	MYL6	-1.33	7.859	24.346	0	0.001
	AGO1	0.407	5.501	4.32	0.044	0.144
	TEKT2	-3.43	0.604	10.987	0.002	0.018
	CLSPN	0.872	1.874	2.672	0.11	0.265
	RFFL	0.251	5.899	1.326	0.256	0.455
	UNC13D	-0.413	4.989	0.553	0.461	0.654
	MFSD11	-0.225	3.44	0.947	0.336	0.536
	DPYSL2	-0.415	7.316	3.916	0.054	0.166
	TGFB2	-1.059	3.12	5.116	0.029	0.11
	GPATCH2	0.236	3.968	0.999	0.323	0.523
	NUP50	0.107	5.868	0.179	0.674	0.813
	CDC45	0.681	0.834	0.794	0.378	0.577
	COMT	-1.443	5.663	7.744	0.008	0.047
	ADA2	-0.356	5.108	0.865	0.358	0.558
	ENSG00000093100	1.619	3.169	16.56	0	0.004
	VNN3P	0.639	4.445	2.154	0.15	0.324
	ECHDC1	-0.433	4.92	1.911	0.174	0.357
	LRRFIP2	0.244	6.005	1.003	0.322	0.522
	SEC22C	-0.056	4.658	0.078	0.781	0.881
	XYLB	0.273	3.931	0.423	0.519	0.701
	HDAC6	0.253	6.045	1.629	0.209	0.401
	GABRP	1.646	-0.006	3.697	0.061	0.18
	CDC6	0.485	2.19	0.647	0.426	0.622
	UPRT	0.165	2.785	0.548	0.463	0.656
	CDC23	0.027	3.912	0.012	0.913	0.954
	AAAS	0.647	4.111	7.163	0.011	0.056
	CBX5	0.263	6.465	1.836	0.183	0.368
	FMO2	-1.689	5.684	12.299	0.001	0.012
	SUCO	-0.354	4.985	1.05	0.311	0.511
	MSH2	-0.337	2.949	1.735	0.195	0.383
	MAP3K1	0.201	5.361	1.044	0.313	0.512
	DHPS	0.09	4.069	0.112	0.74	0.856
	HOOK2	-0.122	4.43	0.117	0.734	0.852
	ARCN1	0.364	6.553	2.141	0.151	0.326
	EPB41L4B	-0.856	4.664	5.205	0.028	0.107
	TMEM38B	0.038	2.861	0.007	0.934	0.965
	PSMD5	0.185	4.264	0.59	0.447	0.641
	PTGS1	0.477	3.582	1.935	0.172	0.355
	NUP188	0.575	5.211	9.217	0.004	0.03
	CRAT	0.682	5.5	4.016	0.052	0.16
	SH2D3C	-0.52	3.573	1.315	0.258	0.456
	NANS	-0.296	4.706	1.041	0.313	0.513
	TBC1D2	-0.136	5.225	0.094	0.761	0.869
	WHRN	-0.34	3.011	0.306	0.583	0.75
	CWF19L1	-0.416	3.587	2.498	0.122	0.283
	SEMA4G	0.499	4.569	0.89	0.351	0.551
	BTAF1	0.645	6.776	4.245	0.046	0.148
	IKZF5	0.354	3.552	1.915	0.174	0.357
	BLNK	2.327	5.206	26.771	0	0
	CYP26A1	0.902	1.081	0.508	0.48	0.668
	TDRD1	-1.174	0.42	2.428	0.127	0.29
	SORBS1	0.221	7.615	0.304	0.585	0.751
	CRTAC1	-2.671	3.943	10.037	0.003	0.024
	BAMBI	-0.072	2.511	0.033	0.857	0.926
	IL11	3.617	1.071	8.081	0.007	0.042
	WAC	0.373	6.598	2.423	0.127	0.291
	CREM	-0.891	3.722	5.416	0.025	0.1
	NUBP2	-1.049	3.512	4.6	0.038	0.131
	TPSD1	-2.892	-0.649	11.383	0.002	0.016
	SMIM24	-2.941	0.358	8.121	0.007	0.042
	HIVEP1	0.422	6.41	1.77	0.191	0.378
	TREM2	-3.725	2.229	24.199	0	0.001
	FKBP5	0.129	7.814	0.095	0.76	0.868
	SRPK1	0.79	5.588	6.618	0.014	0.067
	BRPF3	-0.011	5.21	0.002	0.968	0.982
	MRPS18A	-0.08	3.538	0.055	0.816	0.902
	PGC	-0.359	6.62	0.074	0.787	0.885
	TMEM14A	-1.938	1.437	39.14	0	0
	EFHC1	0.265	4.364	1.132	0.293	0.493
	HSP90AB1	-0.459	8.779	1.665	0.204	0.395
	CDC5L	-0.323	5.085	1.575	0.216	0.41
	ITPR3	0.036	6.841	0.004	0.953	0.975
	ZNF184	0.132	2.39	0.243	0.624	0.78
	DSP	-1.806	8.516	8.026	0.007	0.043
	SIRT1	-0.735	4.185	5.906	0.019	0.085
	HNRNPH3	-0.629	5.09	4.086	0.05	0.156
	IFT74	0.141	3.254	0.135	0.715	0.841
	JAK2	0.827	5.055	6.952	0.012	0.06
	IL12RB1	0.05	1.294	0.012	0.915	0.955
	ABL1	0.159	6.246	0.228	0.636	0.788
	ACOT7	-1.119	2.645	9.885	0.003	0.025
	SH3GLB1	0.315	6.201	1.188	0.282	0.481
	CDC7	0.897	2.042	4.342	0.043	0.143
	SYDE2	-1.557	3.805	18.921	0	0.002
	PCSK5	-0.324	4.228	1.127	0.295	0.494
	SCD	-0.024	9.39	0.002	0.962	0.98
	TMED1	-1.008	3.078	5.945	0.019	0.084
	ABLIM1	-0.919	7.192	11.803	0.001	0.014
	ERMP1	-0.273	4.923	1.299	0.261	0.459
	RAB18	0.386	5.947	1.155	0.289	0.488
	NRP1	0.41	7.003	3.197	0.081	0.217
	PRTFDC1	-0.56	0.063	1.852	0.181	0.365
	PALMD	0.176	4.824	0.154	0.696	0.828
	TSPAN15	-0.163	3.291	0.087	0.769	0.873
	MACROH2A2	0.269	3.253	0.718	0.402	0.599
	WASHC2A	-0.048	5.799	0.068	0.795	0.889
	MAST3	0.404	4.32	0.832	0.367	0.567
	MZF1	0.188	4.3	0.325	0.572	0.741
	OCEL1	-0.868	2.199	4.824	0.034	0.122
	MYO9B	0.276	6.753	0.651	0.424	0.621
	KCNK6	0.417	3.182	1.421	0.24	0.438
	CATSPERG	-1.158	1.276	8.051	0.007	0.043
	PSMD8	0.399	5.333	2.561	0.117	0.276
	FBXL19	-0.409	3.11	0.548	0.463	0.656
	STX1B	0.635	1.724	1.834	0.183	0.368
	HSD3B7	-0.605	5.918	1.225	0.275	0.475
	SETD1A	-0.485	4.233	1.495	0.228	0.425
	BCL7C	-1.229	2.982	13.928	0.001	0.008
	EFNA2	-3.985	0.402	12.36	0.001	0.012
	CIRBP	-0.439	6.536	1.926	0.173	0.356
	ATP5F1D	-0.923	3.931	3.704	0.061	0.179
	CBARP	-0.381	-0.351	0.424	0.519	0.701
	PRKY	3.048	3.667	7.15	0.011	0.056
	IGFALS	-1.854	1.568	5.927	0.019	0.084
	HNRNPM	-0.822	6.071	14.026	0.001	0.008
	MARCHF2	0.026	3.851	0.004	0.947	0.972
	NDUFB7	-2.692	3.661	33.283	0	0
	TECR	-0.39	4.317	3.136	0.084	0.222
	TIMM13	-0.875	3.392	4.123	0.049	0.154
	CDC34	-0.375	4.063	1.066	0.308	0.507
	MTAP	0.427	4.764	6.775	0.013	0.064
	MISP	-1.838	3.085	4.378	0.043	0.141
	CEP170B	-0.93	5.352	3.43	0.071	0.198
	POLR2E	-0.595	4.891	2.388	0.13	0.295
	POLRMT	-0.987	4.404	5.167	0.028	0.108
	CDHR5	-0.957	4.558	3.272	0.078	0.211
	IZUMO4	-0.496	0.556	1.382	0.246	0.444
	RASSF7	-1.768	4.309	13.483	0.001	0.009
	GADD45B	-2.566	7.264	24.685	0	0.001
	PALM	-0.632	3.496	1.463	0.233	0.431
	IGF2-AS	-4.034	1.416	11.886	0.001	0.014
	MKNK2	-0.573	6.961	2.277	0.139	0.308
	ARVCF	-1.527	3.415	12.26	0.001	0.012
	TRMT2A	-0.233	4.13	0.352	0.556	0.73
	RANBP1	-0.843	4.225	6.746	0.013	0.065
	ZDHHC8	-0.17	3.495	0.124	0.727	0.848
	KLHL22	-0.099	3.095	0.098	0.756	0.866
	MED15	0.352	5.562	0.839	0.365	0.565
	SERPIND1	0.908	6.5	3.605	0.065	0.186
	SNAP29	0.265	4.492	1.609	0.212	0.405
	CRKL	-0.301	6.385	1.231	0.274	0.473
	LZTR1	0.262	5.013	0.542	0.466	0.658
	MMP11	-1.785	1.482	1.701	0.199	0.389
	CECR2	-0.297	5.247	0.837	0.365	0.565
	SMARCB1	-0.254	4.761	1.048	0.312	0.511
	P2RX6	-1.588	-0.346	4.248	0.046	0.148
	DERL3	0.552	1.603	0.645	0.427	0.623
	BCL2L13	-0.215	5.453	1.396	0.244	0.442
	DDTL	0.951	1.861	1.919	0.173	0.357
	DDT	-0.106	5.565	0.106	0.746	0.86
	OSM	-0.679	2.693	0.514	0.477	0.667
	CABIN1	0.076	5.963	0.08	0.778	0.879
	TBC1D10A	-0.466	3.948	1.5	0.228	0.424
	SUSD2	-2.413	6.051	7.744	0.008	0.047
	SF3A1	-0.169	5.95	0.318	0.576	0.744
	GGT5	1.817	4.125	23.393	0	0.001
	RNF215	-0.104	2.881	0.105	0.747	0.86
	SEC14L2	0.991	5.476	9.515	0.004	0.027
	SPECC1L	0.257	6.246	1.471	0.232	0.429
	PPIL2	0.403	5.181	3.462	0.07	0.196
	UPB1	1.527	5.968	12.502	0.001	0.012
	YPEL1	-0.829	2.444	4.66	0.037	0.128
	SNRPD3	-0.541	4.919	4.249	0.046	0.148
	PES1	-0.73	4.833	6.142	0.017	0.078
	MAPK1	0.358	6.342	3.638	0.063	0.183
	GGT1	-0.734	3.215	3.651	0.063	0.183
	PRODH	-0.688	4.179	1.382	0.246	0.444
	PPM1F	-0.387	5.129	0.93	0.34	0.541
	SLC35E4	-0.451	1.022	0.859	0.359	0.56
	TOP3B	0.989	4.224	12.04	0.001	0.013
	CYTH4	1.25	4.693	7.835	0.008	0.046
	ESS2	-0.538	2.713	2.283	0.138	0.308
[truncated: 19,721 more rows]

## Sheet: b DEGs CRS
DEGs from a; Cytokine Release Syndrome	geneID	logFC
	ALB	8.739
	APOC3	8.723
	FGB	8.355
	ENSG00000243302	8.233
	NRAP	7.964
	ENSG00000287086	7.544
	CRP	7.373
	ENSG00000258377	7.247
	LBP	7.134
	MYH7	7.09
	ENSG00000254692	6.264
	GC	6.144
	SAA4	6.108
	APCS	6.068
	APOB	5.965
	ENSG00000262533	5.953
	IMPDH1P10	5.846
	ENSG00000268854	5.766
	C9	5.642
	FGL1	5.547
	SERPINC1	5.399
	SAA1	5.388
	ORM1	5.372
	SAA2	5.32
	SERPINB4	5.082
	AFM	4.977
	ENSG00000260349	4.968
	CD177	4.966
	FGA	4.769
	ENSG00000271774	4.761
	CEMIP	4.727
	IL24	4.611
	MMP8	4.543
	ENSG00000259357	4.487
	APOA2	4.41
	KNG1	4.383
	PI15	4.365
	ZDHHC19	4.299
	PDXDC2P	4.29
	MYBPC1	4.265
	ENSG00000257181	4.253
	MS4A1	4.216
	CREB3L3	4.188
	F9	4.149
	ENSG00000254721	4.075
	ACTA1	4.029
	ENSG00000285283	4.024
	GTF2IP1	4.019
	ENSG00000269693	4.01
	ANAPC1P2	3.986
	SBDSP1	3.982
	F13B	3.979
	AMBP	3.967
	CCL19	3.932
	SERPINB2	3.885
	ORM2	3.87
	F2	3.815
	ALDOB	3.788
	IGFBP1	3.786
	CFHR1	3.768
	SPATC1	3.765
	NTSR1	3.757
	RPS2P36	3.756
	CXCL6	3.754
	ITIH1	3.741
	EBI3	3.721
	ENSG00000258610	3.696
	LCN2	3.65
	RFX8	3.639
	TTR	3.637
	SIGLEC10	3.634
	HP	3.628
	IL11	3.617
	PI3	3.614
	MT-RNR2	3.613
	NPIPA7	3.611
	TGIF2-RAB5IF	3.596
	CCN4	3.591
	CCL8	3.589
	SAA2-SAA4	3.583
	ENSG00000284906	3.569
	ENSG00000267601	3.533
	CCNG1P1	3.529
	TNFRSF6B	3.525
	PIGFP2	3.522
	PTPRJ-AS1	3.51
	LINC02887	3.493
	ENSG00000273184	3.487
	ENSG00000271811	3.478
	SPINK1	3.466
	CXCL9	3.464
	PLG	3.402
	ENSG00000268643	3.402
	LTF	3.392
	LINC02456	3.352
	ENSG00000259649	3.345
	ENSG00000279753	3.335
	ENSG00000290183	3.33
	GREM1	3.317
	XPNPEP2	3.314
	MTND1P11	3.313
	ENSG00000261207	3.299
	ENSG00000272638	3.241
	APOA1	3.218
	LIPG	3.198
	ENSG00000276434	3.168
	APOH	3.154
	CSMD2	3.152
	ENSG00000280828	3.151
	PAPPA	3.146
	AHSG	3.143
	LINC02015	3.141
	GPR84	3.134
	H2BC14	3.132
	TIMP1	3.129
	PRG4	3.129
	SLC2A5	3.122
	MTCO3P12	3.103
	G6PC1	3.072
	ENSG00000267561	3.065
	FCRL5	3.039
	SPDYE12	3.039
	CPXM1	3.022
	ENSG00000288065	3.019
	SLC17A1	3.01
	CA12	3.001
	IL1R2	2.999
	ENSG00000277566	2.987
	CFB	2.983
	MTND1P32	2.962
	MUC4	2.934
	ENSG00000267293	2.933
	NSA2P3	2.925
	RN7SL798P	2.912
	RIMKLBP2	2.91
	PTX3	2.899
	XDH	2.89
	ENSG00000268903	2.884
	MUC21	2.881
	P2RX5	2.88
	OLAH	2.875
	BHMT	2.87
	PLA2G2A	2.861
	HNRNPA1P29	2.859
	CXCL11	2.858
	MGAM2	2.856
	SHOC1	2.855
	TNFRSF11B	2.851
	CEACAM1	2.835
	ATP10B	2.835
	ENSG00000290441	2.834
	SUMO2P8	2.831
	PCK1	2.822
	TNC	2.815
	MTND3P12	2.813
	ENSG00000253523	2.812
	ENSG00000277299	2.808
	DPRXP4	2.805
	ENSG00000290549	2.803
	ENSG00000269968	2.789
	HPD	2.778
	ENSG00000276691	2.776
	SPDYE2	2.767
	MEF2B	2.765
	FABP1	2.762
	RAB1AP1	2.745
	ENSG00000237070	2.742
	MTATP6P11	2.735
	CDHR2	2.724
	ADAMDEC1	2.723
	NEB	2.708
	RPL21P87	2.701
	MT-RNR1	2.691
	NRCAM	2.69
	ENSG00000290791	2.684
	MTND4P14	2.682
	ENSG00000278893	2.674
	ENSG00000238035	2.648
	ENSG00000243960	2.643
	RPL15P12	2.639
	SMPD5	2.638
	TMIGD3	2.629
	ENSG00000264924	2.629
	NEURL3	2.626
	AMPD3	2.621
	BAAT	2.615
	AMPH	2.609
	ENSG00000287771	2.586
	GCKR	2.585
	MS4A6E	2.578
	SCG5	2.567
	ENSG00000279030	2.567
	OLFML2B	2.562
	CXCL10	2.56
	IGF1	2.551
	DPYS	2.551
	ENSG00000290585	2.55
	HRH2	2.549
	PAH	2.547
	TAT	2.545
	ENSG00000259381	2.545
	ENSG00000260772	2.545
	ENSG00000288266	2.54
	ENSG00000279989	2.535
	HNRNPA1P76	2.528
	LILRB2	2.523
	ENSG00000270426	2.52
	ENSG00000254765	2.514
	SLCO1B1	2.512
	MESTP1	2.512
	ENSG00000290556	2.493
	CYP2C9	2.491
	COL15A1	2.486
	CXCL14	2.483
	ENSG00000286843	2.472
	ENSG00000225568	2.465
	POM121L9P	2.464
	CTHRC1	2.443
	HNRNPA3P9	2.442
	TMEM171	2.438
	ENSG00000265845	2.433
	POU2F2	2.429
	HAO1	2.421
	GBP5	2.42
	THBS2-AS1	2.418
	MTCO3P11	2.416
	HMGN1P8	2.415
	C8A	2.386
	ENSG00000270120	2.386
	MAFIP	2.386
	SNRPGP4	2.382
	ENSG00000289741	2.381
	MMP2	2.375
	IL2RA	2.372
	GSDMC	2.371
	ENSG00000290059	2.371
	CFHR2	2.368
	ENSG00000280365	2.366
	MTCO1P12	2.359
	HMGA2-AS1	2.35
	LINC02940	2.35
	ENSG00000285830	2.35
	FGF11	2.334
	ENSG00000241886	2.332
	BLNK	2.327
	ENSG00000273451	2.325
	ADAMTS2	2.324
	LILRB1	2.319
	PLTP	2.318
	BPTFP1	2.318
	KIF26B	2.317
	IKBKE-AS1	2.307
	ENSG00000279119	2.307
	ENSG00000279862	2.303
	GK-AS1	2.29
	SERPINE2	2.287
	ADAMTS14	2.286
	ENSG00000262319	2.283
	ENSG00000288711	2.281
	ENSG00000289470	2.281
	TM4SF4	2.277
	JAK3	2.276
	FAM133CP	2.274
	ENSG00000285827	2.273
	ANKRD22	2.272
	E2F8	2.271
	LIPC-AS1	2.268
	ENSG00000259668	2.267
	TDO2	2.257
	TRIM31	2.255
	NCF1B	2.249
	ENSG00000260997	2.245
	ENSG00000278255	2.231
	SERPINA3	2.228
	ENSG00000286555	2.226
	ENSG00000288218	2.226
	PPIAP53	2.225
	UBE2V1P1	2.224
	NPIPB9	2.22
	ENSG00000269924	2.215
	ENSG00000290792	2.214
	ENSG00000268107	2.212
	ENSG00000277978	2.212
	ENSG00000278600	2.212
	ENSG00000288710	2.211
	ENSG00000289914	2.209
	RPL23AP34	2.207
	ENSG00000255031	2.201
	ENSG00000270933	2.195
	PDSS1P1	2.19
	SLC16A4-AS1	2.19
	ENSG00000260661	2.185
	PTPRH	2.183
	XKRX	2.182
	CFL1P5	2.18
	LDHAL6FP	2.18
	PA2G4P6	2.18
	POLHP1	2.177
	ENSG00000265656	2.176
	GJB2	2.174
	ENSG00000231794	2.172
	OR7E12P	2.171
	ENSG00000288031	2.171
	DDX10P1	2.167
	MCHR1	2.166
	MTCO3P23	2.163
	KCNQ3	2.162
	DRAXIN	2.155
	PPFIA4	2.15
	RSC1A1	2.149
	ENSG00000257954	2.149
	DPYSL4	2.143
	ENSG00000228686	2.143
	ENSG00000273138	2.141
	ENSG00000264044	2.139
	LILRA1	2.137
	HPX	2.13
	UGT1A4	2.127
	TF	2.123
	ZDHHC4P1	2.119
	ENSG00000286502	2.118
	PPP4R2P2	2.117
	DAAM2-AS1	2.117
	ENSG00000274105	2.116
	NID2	2.114
	WT1	2.109
	MTCO1P11	2.107
	LINC01480	2.103
	CD72	2.102
	ENSG00000270911	2.098
	ENSG00000279332	2.096
	MTND4P32	2.095
	LINC01270	2.094
	ENSG00000273691	2.083
	ENSG00000266642	2.082
	ENSG00000230826	2.081
	LINC00659	2.079
	ENSG00000274987	2.074
	ABCB11	2.071
	FAM157D	2.07
	SLC26A6	2.068
	ENSG00000260012	2.068
	SMG1P7	2.068
	CYP2C8	2.066
	RPL21P72	2.066
	MTND5P2	2.065
	ENSG00000230010	2.065
	ENSG00000272540	2.064
	ENSG00000284946	2.064
	ENSG00000235036	2.061
	ENSG00000256564	2.057
	FER1L4	2.048
	CDKN3	2.048
	STEAP1	2.048
	ITIH3	2.041
	LILRA6	2.041
	ENSG00000259712	2.04
	MSH5-SAPCD1	2.036
	MTND5P14	2.033
	MCTS2	2.024
	FDX1P1	2.024
	PCSK1	2.022
	LINC01614	2.022
	ENSG00000179038	2.018
	HGD	2.017
	ENSG00000231119	2.016
	ENSG00000289204	2.016
	VTN	2.014
	AK4P1	2.014
	LILRA5	2.012
	ENSG00000246596	2.011
	PRRX1	2.007
	ENSG00000236478	2.004
	ENSG00000131484	1.997
	MYLK-AS2	1.997
	ENSG00000288928	1.997
	TROAP	1.996
	ENSG00000256514	1.994
	ENSG00000269887	1.994
	STEAP2	1.993
	HNRNPA1P71	1.992
	ENSG00000290958	1.991
	HNRNPA1P49	1.99
	HNRNPA1P62	1.98
	MFSD1P1	1.979
	ASGR2	1.977
	ENSG00000218313	1.977
	ENSG00000279500	1.975
	RBMS1P1	1.972
	ENSG00000289175	1.967
	RPL9P30	1.962
	THBS2	1.96
	7SK	1.956
	NAV3	1.953
	METTL7B	1.953
	ENSG00000273350	1.951
	TAS2R3	1.949
	ENSG00000259600	1.948
	ENSG00000289534	1.948
	C1orf220	1.944
	STIL	1.943
	PPP4R2P1	1.941
	ENSG00000290385	1.941
	P4HA3	1.94
	ARAP1-AS2	1.939
	LINC01002	1.938
	GALNT14	1.935
	LINC02964	1.934
	MT-CO2	1.933
	VCAN	1.93
	ENSG00000275481	1.927
	SPOCK1	1.925
	ENSG00000280269	1.925
	ENSG00000197550	1.923
	ENSG00000261369	1.923
	ENSG00000278467	1.92
	ENSG00000274677	1.919
	HSPA2-AS1	1.917
	TRAF1	1.915
	PDZK1	1.913
	ITIH4	1.911
	IL1RL1	1.91
	SULT1C2	1.91
	COL5A2	1.91
	PFN1P2	1.906
	IL4I1	1.905
	GABRR2	1.901
	ENSG00000272140	1.901
	RHOQ-AS1	1.899
	HNRNPA1P59	1.897
	TIMM23B-AGAP6	1.896
	ENSG00000252690	1.895
	LINC01001	1.894
	ENSG00000261646	1.894
	IFI44L	1.886
	PIM2	1.885
	ENSG00000290192	1.881
	ENSG00000264895	1.88
	ENSG00000271971	1.879
	CYP1B1	1.877
	ENSG00000250950	1.876
	PCBP3	1.875
	ENSG00000254325	1.875
	SCYL2P1	1.872
	ENSG00000276071	1.87
	RPL21P77	1.869
	PSTPIP2	1.866
	ENSG00000290032	1.865
	ENSG00000266490	1.862
	ENSG00000286599	1.861
	PRR16	1.859
	ENSG00000282917	1.859
	PIK3CD-AS1	1.858
	NEURL2	1.857
	B3GALNT1P1	1.857
	ENSG00000267682	1.855
	AGAP5	1.854
	ENSG00000249852	1.851
	ENSG00000259326	1.85
	FAP	1.849
	ENSG00000215493	1.847
	PLXNA4	1.847
	ENSG00000289353	1.846
	MTND2P28	1.845
	RPL21P123	1.845
	ENSG00000269938	1.841
	FBXO32	1.839
	ENSG00000276809	1.839
	SLC2A3P4	1.838
	ADAM20P1	1.836
	MTCH1P2	1.834
	GDA	1.833
	ENSG00000279202	1.832
	LINC00862	1.83
	DSTNP1	1.829
	ENSG00000235121	1.828
	CR1	1.827
	POU5F1P3	1.826
	ENSG00000259677	1.818
	GGT5	1.817
	SNAI2	1.815
	ENSG00000236936	1.813
	ENSG00000270116	1.813
	ENSG00000219529	1.811
	ENSG00000231703	1.811
	MTND4P12	1.811
	ENSG00000279227	1.811
	STRIP2	1.809
	AK4	1.808
	CSF3R	1.807
	ENSG00000257298	1.804
	ENSG00000267491	1.804
	ITGA7	1.802
	ENSG00000291221	1.798
	CEACAM3	1.797
	MTCYBP3	1.797
	NPIPB15	1.794
	PCOLCE	1.789
	BGN	1.789
	ARL17B	1.789
	LINC02384	1.789
	ENSG00000285704	1.787
	ENSG00000269967	1.784
	ENSG00000290576	1.782
	GALNT15	1.78
	ENSG00000259118	1.78
	ENSG00000261535	1.78
	FHL3	1.778
	LINC01355	1.778
	ENSG00000283341	1.778
	TIMP4	1.776
	CLDN20	1.776
	PFKFB4	1.772
	ENSG00000279814	1.772
	NR1D1	1.771
	ENSG00000278673	1.77
	SRPX	1.769
	BTF3P16	1.768
	SEPTIN7P10	1.765
	ENSG00000260733	1.763
	IFITM1	1.758
	SMG1P6	1.758
	SPRED3	1.757
	ENSG00000231104	1.756
	ENSG00000272617	1.756
	ARL4AP4	1.755
	HYDIN2	1.755
	ENSG00000287787	1.755
	MAMLD1	1.753
	ENSG00000270110	1.751
	ENSG00000275488	1.751
	PHB1P9	1.75
	IFITM3	1.748
	XBP1P1	1.748
	TAS2R4	1.745
	PTCSC1	1.741
	ENSG00000261770	1.736
	ENSG00000287378	1.734
	TUBB4BP2	1.732
	ENSG00000225092	1.731
	SLC35E1P1	1.731
	RPS2P15	1.729
	ENSG00000261460	1.729
	CHST15	1.728
	CBX5P1	1.728
	ENSG00000279926	1.726
	ENSG00000254317	1.723
	TBL1XR1-AS1	1.722
	RERE-AS1	1.722
	ENSG00000280077	1.722
	PPP4R2P4	1.721
	SYN1	1.72
	ENSG00000276649	1.72
	CXCL12	1.719
	NCR3LG1	1.719
	MIAT	1.717
	ENSG00000270019	1.717
	ENSG00000278896	1.717
	PHF21A	1.716
	ARRDC5	1.716
	FGF7	1.715
	RLIMP1	1.714
	DNAJC19P5	1.713
	WARS1	1.712
	ARMC12	1.712
	SAP30L-AS1	1.712
	ENSG00000262580	1.712
	ENSG00000261596	1.71
	ADORA2A	1.708
	ENSG00000270661	1.707
	ENSG00000280321	1.707
	ENSG00000278275	1.706
	ENSG00000230732	1.705
	CCDC200	1.705
	ENSG00000290737	1.705
	ENSG00000274397	1.704
	ENSG00000286314	1.703
	ENSG00000258521	1.702
	IKBKE	1.701
	ENSG00000279819	1.701
	SMPDL3A	1.7
	FUT3	1.697
	ENSG00000286634	1.692
	ENSG00000289611	1.692
	ADRA2A	1.69
	MEIS1-AS2	1.688
	ENSG00000229052	1.687
	ENSG00000250138	1.687
	ENSG00000280295	1.686
	ENSG00000225339	1.685
	ENSG00000289702	1.684
	ENSG00000271009	1.682
	SNHG4	1.682
	KIZ-AS1	1.681
	KCNJ13	1.68
	BRIP1	1.677
	ENSG00000223522	1.677
	ENSG00000265625	1.676
	C11orf65	1.675
	GK3	1.673
	ENSG00000240399	1.673
	ENSG00000264853	1.673
	MTND5P32	1.672
	LACTB2-AS1	1.671
	ENSG00000271741	1.671
	ENSG00000282798	1.666
	LINC02649	1.664
	WIPI1	1.663
	CYP2C18	1.663
	MT-ND1	1.663
	TUBBP10	1.663
	ENSG00000266805	1.661
	BCL6	1.66
	STEAP1B-AS1	1.659
	ENSG00000258111	1.657
	RPS15AP10	1.656
	ENSG00000260948	1.653
	ENSG00000237938	1.652
	ENSG00000270190	1.652
	ENSG00000276334	1.651
	ALDH1L2	1.65
	ENSG00000279557	1.65
	SLC26A10P	1.647
	ENSG00000225871	1.647
	NEAT1	1.646
	ZNF33BP1	1.645
	ENSG00000282542	1.645
	ENSG00000225313	1.644
	ENSG00000289283	1.643
	SPDYE16	1.639
	BLM	1.638
	ENSG00000254865	1.637
	ENSG00000286162	1.637
	ENSG00000235772	1.636
	ADAMTS12	1.634
	ENSG00000232949	1.633
	ENSG00000272812	1.633
	SFXN4P1	1.631
	ENSG00000289396	1.631
	SLC39A14	1.63
	LINC02422	1.63
	ENSG00000257027	1.628
	ENSG00000271580	1.628
	ZSWIM8-AS1	1.625
	HIF1A	1.623
	MIR223HG	1.622
	KCND3	1.621
	ENSG00000256981	1.621
	ENSG00000093100	1.619
	BMAL2	1.617
	IRAK2	1.617
	ENSG00000260884	1.617
	SLX1B-SULT1A4	1.616
	PATL1	1.612
	NPAS2	1.612
	SPDYE3	1.611
	ENSG00000236867	1.611
	HNRNPA1P35	1.608
	ENSG00000261916	1.608
	CDC25B	1.605
	CCDC14	1.602
	ENSG00000273133	1.6
	ENSG00000227417	1.599
	IL10	1.597
	LINC02912	1.597
	STARD5	1.594
	CALCRL-AS1	1.593
	ENSG00000260558	1.593
	SIGLEC9	1.59
	ENSG00000250602	1.59
	ERI3-IT1	1.589
	OR7E128P	1.588
	SPDYE21	1.588
	CARMN	1.588
	CLTCL1	1.586
	C1RL-AS1	1.586
	MT-CO1	1.583
	ENSG00000256897	1.583
	C1R	1.582
	HOTAIRM1	1.582
	PIK3AP1	1.579
	ENSG00000288539	1.579
	ENSG00000286512	1.577
	FCF1P7	1.575
	AGT	1.572
	SH3PXD2B	1.571
	SLC38A4	1.57
	HIF1A-AS3	1.57
	LINC02656	1.569
	NTAN1P2	1.569
	RARRES1	1.566
	STAT2	1.566
	PRO1804	1.566
	SND1-IT1	1.566
	TRPA1	1.565
	ENSG00000280604	1.565
	ENSG00000286153	1.565
	SAPCD1	1.564
	ZFP69B	1.562
	SGSM2-AS1	1.562
	ENSG00000256973	1.559
	ENSG00000273108	1.559
	OVGP1	1.558
	ENSG00000286071	1.557
	MKNK1-AS1	1.555
	CLIP3	1.554
	ZNF8-DT	1.554
	PTPN7	1.552
	ENSG00000251288	1.552
	ENSG00000284773	1.552
	TNS1-AS1	1.549
	BRCC3P1	1.549
	NANOGP5	1.547
	ENSG00000262652	1.546
	AARSD1P1	1.545
	ZNF529-AS1	1.543
	TMEM161B-DT	1.543
	ENSG00000236525	1.541
	ENSG00000267002	1.541
	ENSG00000278949	1.54
	ENSG00000268583	1.539
	ENSG00000273055	1.538
	SPAG5	1.537
	LDLRAD3	1.537
	ENSG00000243696	1.537
	PLD5P1	1.536
	ENSG00000288948	1.536
	ANKRD18A	1.534
	FAM204BP	1.531
	ENSG00000285868	1.531
	UPB1	1.527
	ENSG00000286545	1.527
	RNF213-AS1	1.526
	ENSG00000287932	1.526
	ENSG00000286458	1.525
	NAV1	1.523
	ENSG00000279319	1.523
	SPDYE5	1.522
	ENSG00000279786	1.522
	RPL18P10	1.521
	SEC61A2	1.52
	GPC6	1.52
	ENSG00000267198	1.52
	GPX7	1.519
	YEATS2-AS1	1.516
	FAM20A	1.514
	LINC01123	1.514
	ENSG00000258230	1.514
	RPS3P2	1.513
	ENSG00000267430	1.511
	ENSG00000279088	1.511
	IGHEP2	1.51
	NPTN-IT1	1.51
	LTB4R	1.509
	MIR34AHG	1.508
	ENSG00000274460	1.508
	LAMA2	1.507
	POLR2J2	1.506
	ENSG00000230433	1.506
	H2BC21	1.505
	HNRNPA1P14	1.505
	ENSG00000272033	1.503
	ENSG00000183562	1.5
	LDHAP2	1.5
	ENSG00000288904	1.5
	LINC02352	1.497
	RPS12P26	1.496
	ANKRD44-IT1	1.496
	PDGFRA	1.492
	PVT1	1.492
	ENSG00000240207	1.491
	ENSG00000258012	1.49
	PPIAP40	1.487
	SEC14L1P1	1.485
	ENSG00000289934	1.483
	CYP7B1	1.482
	ADGRE2	1.481
	ENSG00000289429	1.481
	ENSG00000281195	1.479
	ENSG00000291003	1.479
	ACAD8	1.478
	TLK2P2	1.478
	FCGR2C	1.478
	NOD2	1.476
	ENSG00000226899	1.474
	ENSG00000265194	1.474
	N4BP2L2-IT2	1.474
	LILRB3	1.47
	ZNF215	1.469
	PLGLB1	1.468
	ENSG00000224950	1.468
	LRRC37A2	1.468
	ENSG00000291113	1.467
	HELLS	1.466
	BHMT2	1.466
	GPR135	1.466
	ENSG00000279250	1.464
	DLEU2L	1.463
	ENSG00000266709	1.463
	HMGN1P3	1.46
	ATP5PDP4	1.459
	ACTG1P3	1.458
	IFITM2	1.457
	INTS9-AS1	1.457
	ENSG00000225420	1.456
	ENSG00000287626	1.456
	ENSG00000258559	1.454
	ENSG00000288612	1.454
	RFX7	1.452
	PRAF2	1.452
	APOA1-AS	1.451
	HNRNPA1P50	1.449
	MILR1	1.449
	FN1	1.448
	RPL17P47	1.448
	ENSG00000288759	1.448
	STAB1	1.447
	RUNX2	1.447
	ENSG00000241860	1.446
	ENSG00000286588	1.446
	CARS1-AS1	1.444
	ETV7	1.443
	MSH5	1.443
	AK3P5	1.443
	ENSG00000286943	1.44
	ENSG00000291215	1.439
	EEF1B2P7	1.437
	CALM2P2	1.437
	LINC01410	1.436
	ENSG00000235111	1.435
	RPL21P118	1.434
	ZNF195	1.432
	ENSG00000236540	1.432
	NID1	1.43
	DPH5-DT	1.429
	PFN1P6	1.428
	ENSG00000279789	1.428
	ENSG00000264546	1.427
	SLC43A3	1.424
	ENSG00000223901	1.423
	RPL5P4	1.423
	ENSG00000276248	1.423
	ENSG00000288025	1.423
	PHC2	1.421
	LINC00342	1.421
	ENSG00000269148	1.421
	ENSG00000270953	1.421
	ENSG00000279722	1.421
	ENSG00000206567	1.419
	ENSG00000280069	1.419
	PTGIS	1.418
	TSSK3	1.418
	SLC36A1	1.417
	TMEM9B-AS1	1.417
	ENSG00000279412	1.416
	PYHIN1	1.415
	VAMP1	1.414
	RPL7AP16	1.414
	ENSG00000237719	1.414
	SOD2	1.414
	NOTCH2NLC	1.412
	ARHGAP27P1-BPTFP1-KPNA2P3	1.411
	ENSG00000273828	1.411
	KNTC1	1.41
	NIPAL4-DT	1.41
	GLRX	1.409
	GPAA1P2	1.409
	NPM1P20	1.409
	TRIM66	1.407
	LRRFIP1P1	1.407
	AVIL	1.406
	ARF1P2	1.406
	ENSG00000285857	1.406
	UHRF2P1	1.405
	ENSG00000279059	1.404
	ENSG00000247679	1.402
	JTB-DT	1.402
	ENSG00000289704	1.401
	ENSG00000287950	1.4
	GAPDHP60	1.399
	ENSG00000273449	1.399
	ENSG00000261072	1.398
	ENSG00000225885	1.397
	ENSG00000283208	1.396
	C5orf34	1.395
	ZNF605	1.394
	METTL21AP1	1.394
	H3-7	1.393
	DGKA	1.392
	ENSG00000279176	1.391
	DMXL2	1.39
	ENSG00000253406	1.39
	CD163	1.389
	SYNGAP1	1.389
	IFNAR2-IL10RB	1.389
	CEACAM16-AS1	1.389
	SEC24D	1.387
	ENSG00000272941	1.387
	ENSG00000287643	1.387
	AP4B1-AS1	1.384
	EOGT-DT	1.384
	ENSG00000286672	1.381
	IL18R1	1.38
	NPIPB5	1.38
	ERV3-1	1.379
	C1S	1.378
	TMEM106A	1.378
	ENSG00000249175	1.377
	LPAR2	1.376
	SATB2	1.375
	LINC02193	1.375
	ENSG00000285865	1.373
	ENSG00000289419	1.373
	HNRNPA1P15	1.372
	DYNLT2	1.37
	VAC14-AS1	1.368
	SPDYE1	1.367
	ENSG00000279433	1.366
	LINC01347	1.366
	GLIPR1-AS1	1.364
	ENSG00000227388	1.361
	ANGPTL2	1.36
	RPL7P49	1.36
	ENSG00000272316	1.359
	MROCKI	1.358
	OR7E38P	1.357
	ENSG00000291201	1.357
	ENSG00000271590	1.356
	ZNF841	1.354
	GPR18	1.353
	ENSG00000236576	1.352
	ENSG00000246851	1.352
	ENSG00000289581	1.352
	ENSG00000287656	1.351
	ENSG00000270055	1.35
	ENSG00000287408	1.35
	POLR1HASP	1.349
	ENSG00000289727	1.348
	ENSG00000255710	1.345
	RHBDF2	1.344
	LAIR1	1.344
	RIMKLBP1	1.344
	ENSG00000290989	1.343
	PRDM4-AS1	1.342
	UBE2CP5	1.342
	ENSG00000277701	1.342
	CLEC2D	1.341
	ZNF138	1.341
	BACH1-IT2	1.341
	RTTN	1.34
	ENSG00000275582	1.34
	PIAS3	1.339
	FRMD5	1.338
	PTTG4P	1.338
	SIDT1	1.336
	SH3PXD2A	1.336
	CDCA3	1.336
	GPR52	1.336
	ENSG00000280332	1.336
	LILRB4	1.335
	ADAM28	1.333
	GSDMB	1.333
	UNC119	1.332
	SIAE	1.332
	HNRNPA1P68	1.331
	ENSG00000264112	1.331
	TMEM92	1.33
	TMEM11-DT	1.329
	DCAF13P3	1.325
	ENSG00000275910	1.325
	GBAP1	1.325
	SUMO4	1.323
	ENSG00000259807	1.323
	MOCS1	1.322
	ENSG00000291015	1.322
	DLEU1	1.318
	ENSG00000225963	1.318
	ENSG00000290762	1.318
	MCUR1P1	1.317
	FAM27E3	1.314
	HNRNPRP1	1.313
	EEF1A1P25	1.312
	GCLC-AS1	1.309
	ENSG00000272843	1.309
	ENSG00000279985	1.308
	RPL7P52	1.307
	PSMD10P1	1.307
	TBX19	1.306
	TRAM2	1.305
	NRBF2P5	1.304
	ENSG00000285803	1.304
	MRPL20-DT	1.303
	SGK2	1.301
	RPS15AP29	1.301
	ENSG00000273891	1.301
	ENSG00000291232	1.301
	KCNE1	1.3
	SLC25A37	1.297
	ENSG00000273183	1.296
	ENSG00000268573	1.295
	ASAP1-IT2	1.295
	ENSG00000281969	1.294
	WASF1	1.293
	ENSG00000261094	1.293
	POLR2J3	1.291
	SPDYE10	1.291
	ACP6	1.289
	LRRC37B	1.288
	VEZTP1	1.288
	C6orf163	1.286
	ABCC3	1.284
	ENSG00000253875	1.284
	ENSG00000285879	1.284
	ECM1	1.283
	RESF1	1.283
	NPIPB11	1.282
	LHFPL5	1.281
	ENSG00000266918	1.281
	RUSC1-AS1	1.279
	EMSY	1.278
	IRAG2	1.276
	ORMDL1	1.275
	NINJ1	1.275
	ENSG00000280042	1.275
	FRG1BP	1.272
	ENSG00000272037	1.272
	ENSG00000219470	1.271
	DIRC3	1.271
	PTPN11P2	1.271
	RNFT1-DT	1.271
	HMGB1P51	1.271
	SMARCD3	1.27
	GAPDHP43	1.268
	CABYR	1.267
	LINC00852	1.267
	ENSG00000261056	1.267
	CCDC15	1.266
	ENSG00000283393	1.266
	PITX1-AS1	1.265
	OR7E7P	1.265
	C9orf43	1.264
	SETD5	1.264
	ENSG00000255893	1.263
	ENSG00000277687	1.263
	ENSG00000286145	1.263
	YEATS2	1.262
	KIRREL1	1.262
	LRIG2	1.262
	ENSG00000290705	1.262
	TUBG1	1.26
	ENSG00000278863	1.26
	ENSG00000289401	1.259
	NUP50-DT	1.257
	PIGL	1.256
	ZNF563	1.256
	SIRPA	1.256
	ENSG00000236018	1.256
	ENSG00000287214	1.255
	ENSG00000276517	1.254
	SP140	1.252
	ZNF717	1.252
	CYTH4	1.25
	STEAP3-AS1	1.25
	GHRLOS	1.25
	RPL7AP42	1.249
	XIAPP2	1.249
	ZNF782	1.248
	FMOD	1.247
	ENSG00000273302	1.247
	ENSG00000291171	1.246
	LACTB2	1.245
	SLC38A7	1.244
	CHAC2	1.243
	DDX18P1	1.242
	TNFRSF1B	1.241
	FAM216A	1.241
	ENSG00000229502	1.241
	RPL9P32	1.239
	MGST1	1.238
	SUGT1P2	1.238
	TTC9C	1.234
	C4BPB	1.233
	MITD1	1.233
	ENSG00000270871	1.231
	ENSG00000287202	1.228
	ENSG00000256967	1.227
	ZNF117	1.226
	ENSG00000271976	1.225
	ENSG00000268030	1.224
	ENSG00000286813	1.224
	ENSG00000288719	1.224
	HS3ST3B1	1.223
	RGPD6	1.223
	DBTP1	1.223
	GIT2	1.221
	SLC25A27	1.221
	SIMC1	1.221
	JPX	1.221
	KDM4A-AS1	1.221
	ZNF81	1.22
	DNAJB6P7	1.219
	TSHZ2	1.218
	MIR4435-2HG	1.217
	ZC3H11B	1.217
	ENSG00000260196	1.217
	FAS	1.216
	CTSA	1.216
	SLC25A28	1.216
	ADAT2	1.216
	ZMYND8	1.215
	PARP6	1.215
	SULF2	1.214
	TSSK4	1.213
	MSC-AS1	1.211
	HTR1DP1	1.211
	CLSTN3	1.209
	NPIPB13	1.209
	SEC13P1	1.207
	C1RL	1.204
	GPR89B	1.204
	RN7SL517P	1.204
	ITGA2-AS1	1.204
	ETV6	1.202
	PRKAG2-AS2	1.202
	ATXN2L	1.201
	ALPK1	1.2
	CRYGS	1.198
	PRORSD1P	1.197
	SGSH	1.197
	PDXDC2P-NPIPB14P	1.196
	HSPD1P11	1.195
	RTEL1P1	1.195
	NLGN2	1.194
	FNBP4	1.193
	ENSG00000279092	1.193
	ENSG00000281530	1.193
	SRPX2	1.192
	ATAD5	1.192
	INSYN2B	1.192
	MCTP2	1.191
	ENSG00000279344	1.189
	ENSG00000285103	1.189
	GAPDHP42	1.188
	AGAP4	1.187
	ENSG00000291060	1.187
	RASGRP3	1.186
	SNHG3	1.186
	ENSG00000269535	1.186
	NLRC5	1.184
	ANKRD36C	1.183
	RNPC3	1.183
	LRRC37A	1.18
	ENSG00000226310	1.18
	LOXL3	1.179
	TULP3	1.178
	ENSG00000290548	1.178
	PIGCP1	1.177
	ENSG00000286742	1.176
	ANKRD26	1.174
	ENSG00000289691	1.174
	ENSG00000240591	1.173
	CALML4	1.171
	CENPJ	1.17
	PPP1R3E	1.167
	RAI1-AS1	1.167
	IL15RA	1.166
	CLK2	1.166
	CNTNAP1	1.165
	LINC01138	1.165
	KCNS2	1.164
	TAS2R13	1.164
	H2BC6	1.163
	ENSG00000286561	1.163
	TUBE1	1.162
	MTSS1	1.162
	RPL11P3	1.16
	ENSG00000232934	1.156
	DYSF	1.155
	MCM3AP-AS1	1.155
	CD38	1.154
	TRO	1.154
	SF3A3P1	1.154
	MDC1	1.152
	SPICE1	1.152
	CPT1B	1.151
	SLC13A3	1.15
	ENSG00000260279	1.15
	ENSG00000286786	1.15
	FANCA	1.147
	PIGHP1	1.147
	RASGRP1	1.145
	WASH5P	1.145
	TPST1	1.144
	ENSG00000259959	1.144
	CRADD-AS1	1.142
	HCP5	1.138
	SP110	1.137
	MED28-DT	1.137
	RNF24	1.136
	CASP4	1.135
	AGAP9	1.135
	RPL7AP43	1.134
	EIF4EP1	1.134
	KCNQ1OT1	1.134
	ENSG00000287299	1.134
	ENSG00000287959	1.134
	TSHZ3	1.133
	IL18BP	1.133
	HNRNPMP1	1.132
	SRD5A1	1.131
	GRINA	1.131
	TTLL3	1.131
	MIR1302-9HG	1.13
	ZNF37BP	1.129
	BABAM2	1.128
	MEG3	1.127
	ENSG00000232027	1.127
	ENSG00000279598	1.127
	RBM6	1.126
	TRAF3IP2	1.126
	MSL3	1.124
	C11orf24	1.124
	FADS1	1.122
	SLC11A2	1.121
	ENSG00000286629	1.119
	DLG4	1.117
	H2BC5	1.117
	GUSBP11	1.117
	HSP90AB4P	1.117
	TBC1D3L	1.116
	ENSG00000285979	1.115
	RBP5	1.113
	FBXO22	1.112
	ENSG00000291224	1.112
	ENSG00000228748	1.11
	ENSG00000239407	1.11
	RAPGEFL1	1.109
	USP34-DT	1.109
	ENSG00000278330	1.109
	CEP295	1.108
	ENSG00000291079	1.108
	R3HDM1	1.105
	CARD8	1.105
	TPM3P7	1.105
	TMEM150C	1.105
	ENSG00000267481	1.105
	ENSG00000279342	1.104
	ENSG00000290793	1.104
	ENSG00000291066	1.103
	STK36	1.102
	ENSG00000267632	1.102
	TRPV1	1.1
	POLA2	1.099
	SPATS2	1.099
	PXK	1.099
	ENTPD5	1.099
	PDE1B	1.098
	GRIK1	1.098
	TPT1-AS1	1.095
	ADNP-AS1	1.095
	ENSG00000280190	1.095
	NBPF8	1.093
	DDB2	1.092
	SAP130	1.092
	ACTBP4	1.092
	CCT6P3	1.092
	EIF4G3	1.091
	E2F3	1.091
	FMN1	1.091
	ANKZF1	1.09
	MSTO1	1.089
	ENSG00000272410	1.088
	ENSG00000291067	1.087
	BICC1	1.085
	SCRG1	1.085
	FNDC3B	1.084
	HDAC8	1.084
	PNISR-AS1	1.084
	RRN3P2	1.083
	ZNF225-AS1	1.083
	DUSP8P5	1.083
	PKP4-AS1	1.082
	ENSG00000235066	1.082
	PIAS2	1.081
	ZNF773	1.08
	SYTL2	1.078
	MERTK	1.078
	ENSG00000279544	1.078
	NCOA6	1.077
	ZNF107	1.076
	NBPF19	1.076
	DCBLD1	1.075
	ENSG00000287195	1.075
	CAMTA2	1.074
	PCGF3	1.073
	ADAMTS6	1.072
	ENSG00000269958	1.072
	ODCP	1.07
	SUPT7L	1.069
	MIRLET7IHG	1.068
	NPIPA9	1.066
	ENSG00000279155	1.066
	ENSG00000290399	1.065
	ENSG00000269737	1.06
	ENSG00000290993	1.059
	DROSHA	1.058
	GTF2H2	1.058
	ZNF485	1.058
	PTPRG-AS1	1.058
	ENSG00000270832	1.056
	PHF12	1.055
	UBAP1L	1.055
	TMEM131L	1.054
	DCLRE1C	1.054
	DENND2D	1.054
	RIGI	1.052
	KIF21B	1.052
	ENSG00000290999	1.052
	MPHOSPH9	1.051
	MOV10	1.05
	LRRC75A	1.05
	YY2	1.049
	CEP95	1.049
	KIAA0753	1.048
	ENSG00000273759	1.048
	CACNB2	1.047
	ENSG00000257279	1.047
	ENSG00000264577	1.046
	CDC42EP3	1.044
	SFXN1	1.044
	SLFN5	1.044
	NKTR	1.043
	CELF2-AS1	1.043
	KIZ	1.041
	ADAM20	1.041
	ATF7	1.038
	TRPS1	1.036
	ENSG00000275056	1.036
	C12orf76	1.035
	ENSG00000236194	1.035
	LCP2	1.034
	ZNF449	1.033
	RNF213	1.033
	ENSG00000271533	1.033
	SUPT20H	1.032
	GARS1-DT	1.032
	HSBP1L1	1.032
	TYW5	1.03
	AGAP6	1.03
	CFAP298-TCP10L	1.03
	AFG3L1P	1.029
	COX10-DT	1.028
	ENSG00000262265	1.028
	IFNAR2	1.027
	ENSG00000278784	1.027
	ENSG00000288924	1.027
	DCP1B	1.026
	MAST4-AS1	1.025
	ENTPD7	1.021
	RCOR3	1.02
	PAG1	1.019
	ENSG00000269069	1.017
	LINC03067	1.017
	ZKSCAN8	1.015
	EBLN2	1.015
	POLR2J3	1.015
	ATXN2	1.014
	LINC01409	1.014
	ALOX12-AS1	1.013
	ANKRD61	1.012
	SPAG5-AS1	1.012
	DESI1	1.011
	SERPING1	1.01
	PRH1	1.01
	NAIP	1.009
	ENSG00000291107	1.008
	PDSS1	1.007
	PTPN2	1.007
	HIPK2	1.006
	SEC31B	1.006
	CBLL1	1.006
	CMTM7	1.005
	ARL17A	1.005
	MTF1	1.005
	ZNF616	1.005
	ENSG00000251143	1.005
	C7orf31	1.002
	OXA1L	1.002
	RBMS3-AS2	1.002
	RASA3	1.001
	ANKHD1-EIF4EBP3	1.001
	ENSG00000269984	1.001
	TATDN2P2	1
	ENSG00000291068	0.999
	GMPPA	0.998
	GOLM1	0.997
	SH3BGRL3	0.994
	ENSG00000270108	0.994
	ENSG00000279236	0.994
	UBR4	0.992
	SYVN1	0.992
	ZNF37A	0.991
	SEC14L2	0.991
	ELMOD3	0.99
	ZMIZ2	0.99
	HPS3	0.99
	TOP3B	0.989
	ZFP36L1	0.989
	HNRNPH1P1	0.989
	RBM45	0.988
	TRAF5	0.983
	CEP152	0.983
	SS18	0.983
	SLC38A4-AS1	0.983
	WSB1	0.982
	LENG8-AS1	0.982
	ZNF767P	0.981
	ABHD4	0.98
	GBP2	0.979
	GABBR1	0.979
	KHDC4	0.978
	SP2-AS1	0.976
	ENSG00000260735	0.976
	RUNX1	0.975
	PAXBP1-AS1	0.975
	ENSG00000242628	0.975
	ENSG00000291265	0.975
	DAB2	0.973
	ATF7IP	0.973
	PNISR	0.972
	ZNF248	0.972
	TPP2	0.97
	SLX4IP	0.969
	CCDC66	0.969
	CCNYL7	0.969
	ENSG00000272599	0.968
	APBB1IP	0.967
	NUTM2B-AS1	0.966
	ENSG00000287837	0.966
	ENSG00000279706	0.965
	ZNF875	0.964
	CSNK2B	0.963
	ENSG00000279425	0.963
	MRPS25	0.962
	MED14	0.962
	STRADA	0.962
	PDCD5	0.961
	METTL17	0.961
	ELMO2	0.959
	FAM124A	0.959
	ZNF154	0.958
	VEGFC	0.956
	NPIPB4	0.955
	PDE7A	0.954
	ZNF343	0.953
	PIWIL4	0.95
	NPIPA1	0.95
	PRMT5-DT	0.949
	CARS1	0.948
	ENSG00000279530	0.947
	TIAM2	0.945
	TFG	0.944
	F8A1	0.944
	ARSG	0.943
	EXOSC1	0.942
	ENSG00000259972	0.942
	TCERG1	0.941
	ZNF384	0.941
	ZMYM2	0.94
	CBL	0.939
	ZNF169	0.939
	ALOX12P2	0.939
	UHRF2	0.938
	TTC14	0.937
	ENSG00000291259	0.937
	CKAP4	0.936
	CS	0.935
	OSMR	0.935
	FAM219A	0.935
	TAP2	0.935
	HELZ	0.934
	GLMP	0.934
	ENSG00000291203	0.934
	ENSG00000290560	0.933
	PRKACA	0.932
	MYO19	0.931
	MKNK1	0.93
	NEU3	0.93
	MCTS1	0.928
	STAT1	0.927
	PNKD	0.927
	TAS2R30	0.927
	ZNF419	0.926
	DENND1A	0.926
	CTC1	0.925
	ENSG00000271075	0.925
	PROSER1	0.924
	COPS7B	0.924
	ENSG00000291186	0.924
	ZNF433-AS1	0.921
	POGLUT2	0.92
	ATR	0.92
	CENPP	0.919
	PHAF1	0.917
	SNRNP48	0.916
	ZSWIM1	0.916
	SLC16A14	0.915
	RAMACL	0.915
	P3H1	0.914
	GTF2I-AS1	0.914
	TMEM260	0.913
	GARS1	0.913
	BIVM	0.913
	ZNF892	0.913
	ALG5	0.912
	HMBOX1	0.912
	CDK12	0.912
	TMEM131	0.911
	APBB3	0.911
	NUDT6	0.909
	UROS	0.908
	KLC1-AS1	0.908
	MRPS31P5	0.908
	PHF11	0.906
	SIK3	0.906
	PAXIP1	0.905
	DONSON	0.905
	ENSG00000279159	0.905
	ENSG00000286715	0.904
	ENSG00000236255	0.902
	RIC1	0.9
	ABCA1	0.9
	LPCAT4	0.9
	CHAMP1	0.9
	SHPRH	0.899
	EED	0.898
	GPR180	0.898
	ZSCAN12	0.898
	PEA15	0.898
	CBLB	0.897
	LINC01176	0.897
	BTN2A1	0.895
	SLC16A1-AS1	0.895
	ZNF207	0.894
	PALB2	0.894
	TTC13	0.894
	SBF2	0.892
	FTX	0.892
	UFD1	0.891
	IARS1	0.891
	MTERF4	0.89
	ENSG00000232807	0.89
	LINC01473	0.889
	EZH2	0.888
	NCOR1	0.887
	ZC3H8	0.887
	ACVR1B	0.886
	LINC02693	0.886
	ELK1	0.884
	ARID1A	0.883
	STAMBPL1	0.883
	DTWD1	0.881
	STAMBP	0.881
	ZNF550	0.881
	ZNF814	0.88
	ZBTB25	0.879
	PHF19	0.878
	ZBTB20-AS1	0.878
	NDST2	0.874
	EDRF1	0.873
	CAPRIN2	0.873
	MACROH2A1	0.873
	TAMM41	0.873
	ZNF160	0.872
	SRRM2	0.868
	TUBG2	0.867
	MANBA	0.867
	USP3-AS1	0.867
	RBM26	0.866
	PCDHGA12	0.866
	ZNF333	0.864
	EBLN3P	0.864
	SDHAP4	0.864
	TNRC6A	0.862
	CCDC18	0.862
	KRT8P46	0.862
	PLPP5	0.86
	ITPR2	0.859
	CHPF2	0.858
	SUGP2	0.858
	PTPRE	0.857
	OGT	0.856
	PARP14	0.856
	TUT7	0.855
	SDCBP2-AS1	0.855
	PMS2P3	0.854
	PIGT	0.853
	ANKRD36	0.853
	R3HDM2	0.853
	APOL2	0.852
	DPAGT1	0.852
	USF3	0.849
	GPR137B	0.848
	HPS4	0.848
	PSMG2	0.848
	SPDYE18	0.848
	PORCN	0.847
	ZNF346	0.847
	XPNPEP1	0.845
	NOL8	0.845
	NFRKB	0.843
	ENSG00000223599	0.842
	ZDHHC9	0.841
	RBM4B	0.84
	TAB2	0.839
	MPZL1	0.837
	CCAR1	0.836
	ENSG00000291299	0.836
	SYTL4	0.835
	USP45	0.835
	TUT4	0.835
	LETMD1	0.834
	ZNF577	0.834
	SLC9A8	0.834
	LAMB1	0.832
	PRPF39	0.832
	TRIM27	0.832
	REV3L	0.831
	METTL22	0.831
	DMTF1	0.829
	SLC12A2-DT	0.829
	LINC00115	0.828
	SFMBT2	0.827
	PAN2	0.825
	GLIS3	0.823
	DDX39B	0.822
	HOMEZ	0.822
	CRYBB2P1	0.822
	TAF12	0.818
	ZNF83	0.818
	MAML1	0.817
	NUP214	0.816
	WDFY1	0.815
	SZT2	0.814
	ZNF789	0.814
	ZNF438	0.813
	AAK1	0.812
	SRSF11	0.812
	QSER1	0.81
	GOSR2	0.81
	CCDC93	0.81
	ASAP1	0.808
	SLC38A9	0.807
	THYN1	0.806
	FAM222B	0.806
	NR2F2	0.806
	KMT2C	0.805
	ZNF700	0.805
	CENPO	0.804
	SNRPA	0.801
	KMT2A	0.801
	IRAK4	0.801
	ANKRD36B	0.8
	MAPK14	0.799
	EPG5	0.799
	CLCN6	0.798
	NEK3	0.798
	MED12	0.798
	PHB1P12	0.794
	UQCC1	0.793
	ZNF226	0.79
	PRPF3	0.789
	ZNF182	0.789
	LARP1	0.789
	SMAD3	0.789
	SIPA1L2	0.788
	ACTR3B	0.788
	RNF111	0.788
	HM13	0.787
	CELF1	0.787
	ZNF606	0.787
	FXYD5	0.786
	LATS1	0.786
	IKBKB	0.785
	BICD1	0.785
	N4BP2L2	0.785
	ATMIN	0.784
	LINC00174	0.784
	NBPF9	0.784
	GBF1	0.783
	MADD	0.783
	DCAKD	0.783
	ZNF587	0.783
	ENTPD4	0.782
	TMEM138	0.781
	ENSG00000290683	0.78
	ANAPC5	0.779
	SNHG20	0.779
	ZNF532	0.778
	PLEKHA8	0.776
	IDE	0.776
	SPIN3	0.776
	LGALS8	0.775
	CCNK	0.774
	DGCR11	0.774
	PMM2	0.773
	THOC1	0.77
	AVL9	0.77
	TAF10	0.77
	ENSG00000290890	0.77
	FAM98A	0.769
	ATP6V0A1	0.768
	TMEM69	0.768
	ENSG00000290921	0.767
	CD99P1	0.767
	CD99P1	0.767
	AGK	0.766
	USB1	0.766
	SCFD1	0.764
	SPG11	0.764
	NTAQ1	0.764
	PSMD6	0.763
	GTF3C2-AS2	0.763
	POLD3	0.761
	IFIH1	0.76
	SP140L	0.76
	TRIM68	0.759
	FLJ42393	0.759
	KRIT1	0.757
	ZNF586	0.755
	PCNX1	0.754
	ZBTB24	0.754
	ENSG00000259366	0.753
	TSC1	0.752
	TSTD3	0.752
	KIAA0586	0.749
	SH3BP5-AS1	0.747
	OGFOD1	0.746
	CD68	0.744
	HPS1	0.743
	MEF2A	0.742
	DEPDC5	0.742
	ALG3	0.742
	BCLAF3	0.741
	ENSG00000260917	0.74
	TTC17	0.738
	NEMP1	0.737
	UBE2V1	0.737
	MATCAP1	0.736
	PRR3	0.735
	HMGXB3	0.733
	ZNF300	0.733
	ARID2	0.733
	KAT7	0.731
	FKTN	0.73
	TUG1	0.73
	MYCBP2	0.729
	PTPN18	0.729
	SENP1	0.728
	EZH1	0.728
	MBD5	0.727
	CYFIP2	0.726
	NAA40	0.725
	TTLL5	0.725
	SDHAP1	0.725
	PWWP2A	0.722
	CEP43	0.722
	CNOT4	0.72
	MARF1	0.72
	TIMM10B	0.719
	ALMS1	0.718
	DENND5A	0.716
	FAN1	0.715
	NDUFAF7	0.714
	TMEM218	0.714
	ENSG00000260007	0.712
	TTLL4	0.711
	KXD1	0.71
	MRRF	0.71
	ZNF584-DT	0.708
	CASP8	0.707
	ATOX1	0.707
	SMG7	0.706
	NSD3	0.706
	ZFPL1	0.705
	CSNK2A1	0.702
	CCNL2	0.702
	NBPF15	0.701
	ERGIC1	0.7
	PRPF18	0.7
	ERCC4	0.7
	ENSG00000291075	0.699
	TRIM38	0.698
	THAP6	0.698
	MAP4K4	0.696
	DDX55	0.694
	CPSF7	0.694
	ZBTB37	0.694
	GDI1	0.693
	INTS9	0.692
	INPP5F	0.691
	PIKFYVE	0.69
	EXOSC8	0.687
	ENSG00000291178	0.687
	FKBP14	0.686
	USP34	0.685
	ALG13	0.683
	ARNT	0.683
	COX10	0.682
	EP300	0.682
	ENSG00000274265	0.681
	ERP44	0.68
	RNF169	0.68
	ST7L	0.679
	ENSG00000267787	0.677
	GATAD2B	0.675
	PPME1	0.675
	LINC00630	0.675
	STK38	0.674
	HECTD4	0.674
	ATM	0.672
	ZBTB49	0.67
	INTS8	0.669
	ALKBH6	0.669
	PARN	0.668
	NT5C2	0.667
	MLLT10	0.667
	CSNK1G1	0.667
	FUBP3	0.665
	VPS45	0.663
	LPP	0.663
	SNAPC3	0.662
	TMA16	0.662
	PCID2	0.661
	PRRC2C	0.66
	PPHLN1	0.66
	USP31	0.659
	XPO5	0.659
	USP49	0.659
	GPATCH8	0.659
	MARK3	0.658
	TSEN2	0.658
	NADSYN1	0.656
	ZNF286A	0.655
	TBC1D22B	0.653
	SYNJ1	0.653
	MCCC2	0.652
	SS18L1	0.651
	NPHP3	0.648
	ZDHHC6	0.646
	MFAP3	0.645
	TTF2	0.645
	GGA3	0.645
	HSPBAP1	0.644
	QRICH1	0.644
	MBD1	0.643
	UBAP2	0.642
	IRF2	0.641
	RARS2	0.637
	OTULIN	0.636
	ZNF506	0.635
	SNX9	0.634
	ZNF318	0.634
	ZNF619	0.632
	SLF2	0.63
	FNBP1	0.629
	SRRM1	0.627
	TEX10	0.627
	AREL1	0.626
	ALG8	0.626
	SMCR8	0.625
	AP3M2	0.624
	CHD8	0.621
	POLR3A	0.621
	DIP2A	0.62
	MAX	0.618
	ERVK3-1	0.618
	SEC31A	0.616
	POU2F1	0.615
	RBMX	0.615
	C2CD3	0.612
	ERMARD	0.609
	UBAP2L	0.608
	NSD1	0.608
	UBE4A	0.607
	ADAT1	0.606
	RNF4	0.603
	PRDM15	0.603
	JAK1	0.601
	HDAC3	0.601
	NF1	0.601
	STXBP5	0.6
	PRR14L	0.6
	MED23	0.593
	RNF114	0.593
	SNX19	0.592
	SP100	0.59
	RAB3GAP2	0.59
	ATXN7	0.59
	TBP	0.589
	NCAPD3	0.587
	VTI1A	0.587
	GPATCH2L	0.586
	PHC3	0.585
	RBM5	0.584
	S100PBP	0.584
	ADAR	0.584
	ZNF224	0.584
	CAPZB	0.582
	SCAF8	0.581
	SP1	0.58
	USP32	0.579
	ZNF621	0.577
	NUP188	0.575
	PSME3IP1	0.575
	FAM120A	0.574
	TRNT1	0.571
	POMT2	0.57
	ASH1L	0.57
	FAM193A	0.57
	DEDD	0.57
	SETDB1	0.569
	ANKRD17	0.568
	MSI2	0.566
	KANSL1	0.565
	MAP4	0.564
	ZNF317	0.564
	AP3B1	0.56
	HARS2	0.554
	FAM120B	0.552
	RFWD3	0.552
	FAM219B	0.546
	SLC7A6OS	0.544
	DELE1	0.539
	RNF34	0.533
	ARID1B	0.532
	VPS53	0.532
	ZNF236	0.53
	MSL1	0.53
	BLTP3A	0.528
	RAF1	0.528
	FKBP15	0.527
	PMS2	0.526
	TTL	0.516
	ZCCHC8	0.511
	KIAA0319L	0.511
	TRAPPC10	0.511
	GON4L	0.506
	CDK5RAP1	0.493
	SMYD4	0.493
	NFX1	0.491
	UIMC1	0.49
	CLCC1	0.49
	AFF1	0.49
	TCF20	0.489
	NOTCH2NLA	0.488
	XPO7	0.479
	DCAF5	0.479
	TBC1D7	0.476
	WDR11	0.473
	FAF2	0.472
	EWSR1	0.468
	NUP85	0.457
	NECAP1	0.447
	INTS4	0.428
	EIF2B1	0.427
	VPS13D	0.422
	GAPVD1	0.4
	FAM20B	-0.434
	KIF13B	-0.466
	RAPGEF2	-0.494
	ENSA	-0.495
	CNST	-0.496
	RBM23	-0.504
	MTMR12	-0.504
	EXD2	-0.51
	RALBP1	-0.514
	HNRNPLL	-0.515
	MGAT4A	-0.536
	RBSN	-0.54
	ZNF268	-0.548
	GABARAPL2	-0.554
	METTL2A	-0.555
	STARD13	-0.557
	MBP	-0.559
	IPO8	-0.561
	CNNM2	-0.561
	PPP3CA	-0.576
	LYRM2	-0.578
	VPS35	-0.585
	TSN	-0.585
	CTNNBL1	-0.588
	TMEM50B	-0.59
	TMEM170A	-0.598
	ZNHIT3	-0.611
	GLOD4	-0.615
	TXNDC15	-0.619
	ATG5	-0.62
	RTF2	-0.629
[truncated: 1,837 more rows]

## Sheet: c All genes Classical sig.
From Budhraja et al 2022; Classical signature. NCBI SRA, BioProject: PRJNA1036279	geneID	logFC	logCPM	F	PValue	FDR
	TSPAN6	1.95962	3.93963	38.8452	1.89065e-07	2.31743e-06
	DPM1	0.415124	4.48404	5.10706	0.0291146	0.0574083
	SCYL3	0.528709	3.7732	9.07908	0.0043832	0.0115496
	C1orf112	0.905754	2.16582	9.00122	0.00453885	0.0119034
	FGR	-0.410978	5.56468	0.857819	0.35968	0.456296
	CFH	3.29037	9.27779	86.4052	1.01772e-11	4.92315e-10
	FUCA2	1.01529	4.70924	13.6799	0.000627306	0.00223876
	GCLC	2.35336	5.72244	74.6856	7.69912e-11	2.89818e-09
	NFYA	0.464134	4.47895	5.38688	0.0252528	0.0508993
	STPG1	-0.887082	1.72475	16.3146	0.000225073	0.000938487
	NIPAL3	-0.999859	4.31068	25.6144	8.87212e-06	6.08278e-05
	LAS1L	-0.247883	4.60156	3.19876	0.080962	0.134627
	ENPP4	-0.141563	4.50014	0.159763	0.691415	0.760728
	SEMA3F	-0.271057	3.97969	0.633004	0.430762	0.52601
	CFTR	-1.07239	3.66291	6.41839	0.0151446	0.033013
	ANKIB1	-0.138957	5.14689	1.18269	0.283057	0.377312
	CYP51A1	1.5014	7.00611	13.011	0.000821429	0.00280747
	KRIT1	0.611562	5.76955	9.47633	0.0036725	0.00995218
	RAD52	0.536015	3.23193	2.96741	0.0923683	0.150201
	BAD	-0.537493	3.1765	2.68118	0.109067	0.171836
	LAP3	0.985072	6.80626	14.2302	0.000504013	0.00185923
	CD99	-0.330803	5.32942	3.43098	0.0710725	0.120762
	HS3ST1	-1.2724	1.13193	16.2805	0.000227999	0.00094923
	AOC1	0.715258	-0.0291809	1.44563	0.236015	0.325331
	HECW1	-1.60114	-0.176764	10.2166	0.00265433	0.00756885
	MAD1L1	-1.29847	4.04791	17.6152	0.000138431	0.000619941
	LASP1	-0.052443	6.69171	0.0749404	0.785626	0.8372
	SNX11	-0.0175943	3.23874	0.00641935	0.936524	0.95338
	TMEM176A	3.73534	6.41642	104.209	6.57259e-13	5.19115e-11
	M6PR	-0.292097	5.79146	3.3591	0.0739818	0.124826
	KLHL13	-0.27039	0.57089	0.568023	0.455281	0.548458
	CYP26B1	-0.588775	2.07316	1.36226	0.249779	0.340735
	ICA1	0.265991	3.80763	0.658905	0.421557	0.517092
	DBNDD1	0.990063	1.74576	9.27601	0.0040142	0.0107124
	ALS2	0.94494	5.89654	31.3661	1.52062e-06	1.36389e-05
	CASP10	-0.0990088	4.91215	0.310591	0.580297	0.663372
	CFLAR	-0.46349	8.78683	5.95222	0.0190345	0.0401779
	TFPI	1.02062	8.0678	13.5765	0.000653841	0.00231444
	NDUFAF7	0.97515	3.43964	24.5772	1.24066e-05	8.06076e-05
	RBM5	0.484228	6.95196	14.801	0.000402751	0.00153658
	MTMR7	1.16867	2.82203	10.7533	0.00210581	0.00622777
	SLC7A2	3.50765	8.67949	58.7803	1.72047e-09	4.37059e-08
	ARF5	-0.356402	4.61392	2.48379	0.122583	0.189367
	SARM1	-0.0778857	3.81019	0.0758328	0.784386	0.836206
	POLDIP2	1.63439	5.75088	48.8458	1.5651e-08	2.85807e-07
	PLXND1	-1.00719	6.51963	10.0033	0.00291283	0.00818667
	AK2	1.0544	6.79375	52.4795	6.78867e-09	1.41236e-07
	CD38	-0.0295732	4.29536	0.0101079	0.920399	0.942353
	FKBP4	1.78066	6.53592	6.62099	0.0137284	0.0303709
	KDM1A	0.0301155	5.84766	0.0521686	0.820448	0.864593
	RBM6	0.467731	6.90083	4.06118	0.0503568	0.0907319
	CAMKK1	-1.42454	2.3023	13.3001	0.000730725	0.00254023
	RECQL	-0.254331	4.37567	1.00512	0.321857	0.417607
	VPS50	-0.0321152	3.66651	0.0208389	0.885914	0.916638
	HSPB6	0.471472	2.56497	0.87339	0.3554	0.451869
	ARHGAP33	-0.685476	1.46643	2.9659	0.0924489	0.15031
	NDUFAB1	1.10297	3.55038	15.8382	0.000269784	0.00109485
	PDK4	0.045389	7.56041	0.00645276	0.93636	0.953344
	ZMYND10	-2.94155	1.70676	27.7617	4.5093e-06	3.42694e-05
	SLC25A13	2.48292	5.02487	100.648	1.10543e-12	7.87208e-11
	ST7	-0.0198542	4.00163	0.0101439	0.920258	0.942289
	CDC27	0.78667	5.73772	7.51754	0.00896174	0.0212036
	SLC4A1	0.0954487	1.7969	0.029061	0.865463	0.900927
	HCCS	0.89791	2.51259	10.7598	0.00209991	0.00621389
	DVL2	-0.161101	3.67362	0.402322	0.529357	0.618086
	PRSS22	-0.873861	2.01433	1.81592	0.185077	0.26636
	UPF1	0.00559939	5.98589	0.000373139	0.984681	0.988732
	SKAP2	-0.874552	4.54473	13.645	0.000636133	0.00226357
	SLC25A5	0.199461	5.76789	0.457256	0.502643	0.593724
	MCUB	-0.794898	2.28527	10.6703	0.0021821	0.00641517
	POLR2J	0.442976	2.739	2.47135	0.123497	0.19056
	DHX33	0.563596	3.82695	10.8202	0.00204636	0.0060853
	MEOX1	-1.22406	-0.349134	6.80371	0.0125725	0.0281318
	THSD7A	-0.534371	3.48734	6.10694	0.0176362	0.0376655
	LIG3	-0.197293	4.82778	2.15804	0.14933	0.223056
	RPAP3	-0.214623	3.32978	0.680099	0.414246	0.510029
	ACSM3	1.30546	3.25163	15.486	0.000308806	0.00122844
	REXO5	1.07718	1.13749	10.576	0.00227234	0.00663672
	CIAPIN1	0.7584	3.8873	12.8845	0.000864809	0.00293
	SPPL2B	-0.0395777	4.20804	0.0130215	0.909697	0.934611
	ATOSB	-0.0702737	3.9955	0.068602	0.794673	0.844627
	COPZ2	0.719727	2.1287	7.3218	0.00982587	0.0228597
	PRKAR2B	-1.49474	2.85373	43.9684	5.07997e-08	7.64636e-07
	MSL3	0.445542	4.52722	7.53559	0.00888623	0.0210479
	CREBBP	0.327179	6.73322	2.94406	0.0936167	0.151931
	TSPOAP1	-1.96488	3.50389	28.2052	3.93208e-06	3.05891e-05
	MPO	-0.717141	2.02537	0.8638	0.358027	0.454678
	PON1	6.3256	5.11941	123.394	4.89743e-14	6.04387e-12
	GCFC2	0.474819	3.67318	4.53648	0.0391265	0.0733368
	WDR54	-0.49164	1.81432	2.67023	0.109771	0.172732
	CROT	0.391522	2.78008	2.11037	0.153789	0.228628
	ABCB4	7.7803	6.49937	115.663	1.34156e-13	1.34902e-11
	KMT2E	-0.0648327	6.91982	0.111184	0.740472	0.800909
	RHBDD2	0.389828	4.90791	1.36587	0.249162	0.340079
	IBTK	1.68801	6.43308	27.0026	5.71314e-06	4.17528e-05
	ZNF195	0.468715	4.3728	3.04937	0.0881329	0.144515
	MYCBP2	0.429464	7.55976	7.74096	0.00807345	0.0193956
	FBXL3	-0.206909	5.11663	0.605244	0.440976	0.535324
	ITGAL	-1.12058	4.87551	9.97818	0.00294493	0.00826406
	PDK2	0.952769	3.89067	16.1374	0.000240713	0.000994614
	ITGA3	-1.90977	6.80025	16.8113	0.000186662	0.000798563
	ZFX	-0.035343	5.42816	0.0404295	0.841621	0.881007
	LAMP2	0.861973	6.78694	8.96321	0.00461698	0.0120704
	ITGA2B	-1.40227	1.32423	10.1208	0.00276726	0.00785069
	ASB4	-1.17428	-0.433848	4.07331	0.0500298	0.0902367
	GDE1	0.486344	5.33469	4.04733	0.050733	0.0913018
	REX1BD	-0.716582	3.18499	4.18358	0.0471615	0.0857858
	CRLF1	0.249697	1.54885	0.401624	0.529713	0.618369
	OSBPL7	-0.822947	2.77429	4.18898	0.0470256	0.0856158
	TMEM98	-1.99827	3.11373	32.4204	1.11844e-06	1.05962e-05
	YBX2	1.28659	0.35297	7.5683	0.00875112	0.0207732
	MAP3K14	-1.17691	3.93829	27.6826	4.62138e-06	3.49987e-05
	ABCC8	-0.690687	2.99466	0.949825	0.335384	0.431447
	TMEM132A	-0.704608	3.14334	2.24888	0.141246	0.212942
	AP2B1	-0.345422	6.54299	5.25368	0.0270171	0.0538705
	ZNF263	-0.667231	4.25905	10.4879	0.00236025	0.00685082
	CX3CL1	-1.12966	5.14112	4.25844	0.0453171	0.0829921
	SPATA20	0.694215	4.82599	6.1206	0.0175181	0.0374501
	CACNA1G	-0.934003	-0.191095	3.41793	0.0715911	0.12151
	TNFRSF12A	-0.339883	4.66023	0.43111	0.515053	0.605425
	MAP3K9	-0.164592	4.16349	0.475453	0.494309	0.58632
	RALA	-0.913294	4.17197	29.3656	2.75988e-06	2.26977e-05
	BAIAP2L1	0.903898	5.07727	25.358	9.63376e-06	6.4983e-05
	KDM7A	0.603857	5.75567	9.66885	0.00337307	0.00926913
	ETV1	-1.47254	4.50652	23.5074	1.76387e-05	0.000108469
	AGK	0.489022	4.3874	11.1066	0.00181117	0.00547664
	ALDH3B1	-2.47415	4.65833	32.2477	1.17578e-06	1.10554e-05
	TTC22	1.13856	3.06871	11.4302	0.00157947	0.00487303
	PHTF2	-0.20134	3.88087	0.718904	0.401345	0.497274
	FARP2	0.252482	5.02795	3.16172	0.0826769	0.137017
	GGCT	0.0227344	3.04906	0.00889987	0.925292	0.945801
	DBF4	1.23496	2.55332	10.8912	0.00198516	0.00592438
	TBXA2R	0.0244528	0.640749	0.00504087	0.943738	0.959015
	IFRD1	-0.0506181	5.36672	0.0427495	0.837204	0.87744
	COX10	1.32446	3.54862	38.9337	1.84682e-07	2.27914e-06
	GTF2IRD1	-0.516991	3.55265	2.566	0.116734	0.181729
	PAF1	-0.963538	4.73681	18.3316	0.00010647	0.00049721
	VPS41	-0.618848	5.35445	17.8697	0.00012605	0.000573966
	ARHGAP44	-2.31722	4.07357	41.5001	9.46828e-08	1.29259e-06
	ELAC2	0.764766	5.13513	17.76	0.000131239	0.000593238
	SCIN	-2.32908	2.59229	21.2644	3.76732e-05	0.000205027
	ARSD	0.221252	5.54039	0.623514	0.434212	0.529428
	PNPLA4	0.967342	2.3453	11.3544	0.00163078	0.00500877
	ADIPOR2	2.01605	7.04141	61.3667	1.00456e-09	2.7619e-08
	UPP2	3.34973	0.655622	22.5982	2.39071e-05	0.000139963
	MARK4	0.0781376	4.09031	0.0966584	0.757426	0.814542
	PROM1	0.089706	2.08753	0.0274134	0.869296	0.903964
	CCDC124	-1.37199	3.02545	26.4613	6.77512e-06	4.84224e-05
	CEACAM21	-1.20825	0.159954	12.3337	0.00108382	0.00355223
	PAFAH1B1	-0.100065	6.66334	0.638629	0.428737	0.524045
	NOS2	0.645557	1.26676	0.729706	0.39786	0.494061
	DNAH9	-2.93894	2.57221	20.9586	4.18751e-05	0.000224298
	BLTP2	0.150425	7.04179	0.495611	0.485349	0.577758
	GAS7	-0.959665	5.62504	8.87507	0.00480369	0.0125007
	TRAPPC6A	-0.867975	1.75791	5.74864	0.0210591	0.0436663
	MATK	-2.39945	1.1822	39.4589	1.60796e-07	2.03882e-06
	CD79B	-0.947002	0.622815	3.18494	0.0815969	0.135506
	SCN4A	0.536433	0.116445	1.39941	0.243523	0.333733
	ST7L	0.48505	3.29158	9.49414	0.00364364	0.00988908
	PAX6	-1.8675	-0.0172259	8.0335	0.00704968	0.0172704
	RPUSD1	-0.27881	2.47034	0.397662	0.531741	0.620269
	RHBDF1	-0.562686	3.73921	2.44393	0.12554	0.193165
	LUC7L	-0.0816253	5.3308	0.333875	0.566494	0.651674
	CACNA2D2	-2.73918	5.77269	20.643	4.67336e-05	0.000246792
	BAIAP3	-0.383818	2.14571	0.664256	0.419693	0.515502
	TSR3	-1.06475	3.22095	16.3591	0.000221315	0.000924592
	PIGQ	-0.48817	3.99056	1.75572	0.192375	0.275075
	CRAMP1	-0.426208	4.661	2.83571	0.0996631	0.159728
	TEAD3	-0.535561	4.03697	2.87987	0.0971473	0.156554
	SELE	-0.166103	5.1453	0.0410031	0.840517	0.880244
	DNAJC11	0.636353	5.40416	10.3637	0.00249034	0.00716996
	FMO3	3.33743	5.44182	71.4368	1.39974e-10	4.87998e-09
	MYLIP	-1.26588	3.80954	23.5937	1.71412e-05	0.000105769
	E2F2	-0.308797	1.84087	0.486449	0.489387	0.581704
	PSMB1	0.772981	5.28372	10.4022	0.00244927	0.00707233
	SYN1	0.161991	0.382485	0.124077	0.726428	0.789804
	JARID2	-0.399609	4.85554	5.33908	0.0258712	0.0519288
	CDKL5	-1.26345	4.82108	43.1023	6.30679e-08	9.25565e-07
	CAMK1G	-2.42613	0.0375863	36.1912	3.86702e-07	4.32947e-06
	CDK11A	-0.331315	4.28775	1.61122	0.211361	0.297194
	NADK	0.781711	5.99888	7.24177	0.0102045	0.0235739
	DLEC1	-1.95511	2.46402	17.4303	0.000148223	0.000656754
	CYTH3	-1.47059	4.05733	52.8538	6.24075e-09	1.31857e-07
	ADAM22	-1.67704	1.90046	32.0906	1.23065e-06	1.1472e-05
	SYPL1	0.516955	4.64317	2.89309	0.096408	0.155571
	CYB561	-0.936581	4.21	15.8519	0.000268376	0.00109098
	SPAG9	-0.140027	7.32394	0.63478	0.430121	0.525464
	CELSR3	-1.18224	2.25194	6.14952	0.017271	0.036991
	AASS	1.85964	7.26001	27.9283	4.28271e-06	3.28115e-05
	PLEKHG6	-1.37677	2.225	10.4302	0.00241981	0.00699845
	SS18L2	-0.452338	1.39606	3.05407	0.0878967	0.144182
	MPND	-1.06181	2.1538	13.5465	0.000661769	0.00233869
	MGST1	3.53187	7.28415	66.0609	3.91576e-10	1.23261e-08
	CRY1	-0.448665	4.16836	2.97482	0.0919761	0.149765
	PGLYRP1	0.335488	-0.29602	0.331159	0.56807	0.652927
	NFIX	-1.12295	5.53047	10.5364	0.00231148	0.00673085
	ST3GAL1	1.02601	7.27657	15.8707	0.000266461	0.00108381
	MMP25	-0.183622	3.40314	0.120471	0.73027	0.792836
	IL32	1.67454	7.18019	15.2159	0.00034275	0.00134015
	PKD1	-0.837641	5.94371	3.84922	0.0564674	0.0999
	MAPK8IP2	-1.975	0.589869	17.7653	0.000130983	0.000592573
	MED24	0.0687796	4.90632	0.0772779	0.782395	0.834452
	RHOBTB2	-1.68624	6.47352	8.99034	0.00456109	0.0119486
	HEATR5B	-0.318318	5.19549	4.47514	0.0404082	0.0753362
	SEC62	-0.640405	6.11674	6.14535	0.0173064	0.0370522
	RPS20	-0.813023	7.25835	10.2641	0.00260021	0.0074359
	CSDE1	-0.0313349	8.13819	0.0229412	0.880341	0.912562
	UBE3C	0.63058	6.01528	20.8774	4.30722e-05	0.000229859
	REV3L	0.110576	6.41336	0.32955	0.569008	0.65377
	TENM1	3.28917	5.20043	39.7223	1.50055e-07	1.91943e-06
	MASP2	5.15834	5.60077	166.341	3.82492e-16	1.29808e-13
	IYD	2.45793	3.32689	25.4938	9.22207e-06	6.26928e-05
	FAM76A	-0.779913	2.95079	15.8089	0.000272823	0.00110492
	TRAF3IP3	-0.652677	3.17302	4.49704	0.0399454	0.0746143
	POMT2	0.601606	3.84383	17.0932	0.000167996	0.000729563
	VTA1	0.242803	3.67764	0.883936	0.352541	0.448987
	MLXIPL	5.38365	6.05236	116.245	1.24149e-13	1.27121e-11
	BAZ1B	-0.447166	6.47467	8.90263	0.00474447	0.0123635
	RANBP9	0.411011	4.88161	4.29083	0.0445437	0.0817827
	ETV7	0.185339	1.39978	0.211601	0.647905	0.723305
	SPRTN	-0.255396	3.0546	2.1307	0.151869	0.22621
	METTL13	-0.137257	3.80523	0.428598	0.516273	0.606395
	DYRK4	-0.0346205	2.51428	0.0355231	0.851418	0.889333
	ZNF207	0.935908	7.23626	23.797	1.60264e-05	0.0001002
	UQCRC1	1.37628	5.99623	19.0194	8.30253e-05	0.00040001
	STARD3NL	-0.838803	3.62275	24.2736	1.37006e-05	8.76255e-05
	CD9	-1.68103	5.93446	29.6947	2.49899e-06	2.07723e-05
	HHATL	0.988689	-0.437121	2.28976	0.137774	0.208664
	NCAPD2	-0.470215	4.42287	4.9118	0.0321863	0.062346
	IFFO1	-0.365284	3.4756	1.66669	0.203814	0.288394
	GIPR	-1.42205	1.26569	11.2965	0.00167119	0.00511676
	PHF7	0.687803	1.70018	7.29495	0.00995119	0.0230771
	SEMA3G	-1.48963	4.26291	11.4823	0.00154523	0.00478433
	NISCH	-0.232675	5.95479	0.667882	0.418436	0.514226
	STAB1	1.08798	6.81824	7.11469	0.010838	0.0248052
	FUZ	-1.13862	1.40255	18.2202	0.000110878	0.000513647
	SLC6A13	2.15515	1.19779	25.3711	9.59325e-06	6.475e-05
	IDS	-1.00033	5.89055	34.7838	5.7111e-07	6.00412e-06
	PRSS3	5.77726	0.746446	68.8399	2.2861e-10	7.56922e-09
	ZNF200	0.0315541	2.59326	0.0158373	0.900458	0.927841
	CD4	-0.747979	5.37384	7.20609	0.0103782	0.0239096
	LRRC23	-2.19372	2.23595	48.1602	1.83936e-08	3.299e-07
	BTK	-1.81002	3.48188	33.5914	7.99432e-07	8.02017e-06
	HFE	0.516566	3.03665	3.22886	0.0795974	0.132723
	SCMH1	0.282915	4.34221	3.28827	0.076979	0.128951
	FYN	-1.09116	5.01455	23.2344	1.93159e-05	0.000116942
	HIVEP2	0.406662	7.02784	2.06516	0.158161	0.234106
	FMO1	-1.26283	-0.22592	3.47278	0.0694391	0.118636
	ELOA	0.206898	6.0021	1.77718	0.189734	0.271943
	LYPLA2	0.393631	4.04137	1.87061	0.178733	0.258788
	CLCN6	1.02582	5.09838	38.583	2.02687e-07	2.47323e-06
	MRC2	-1.7076	5.85393	10.557	0.00229106	0.00668322
	NME1-NME2	-1.56519	0.356957	4.22401	0.0461552	0.0842359
	TSPAN9	0.461448	5.56215	3.66992	0.0622772	0.108334
	BTBD7	-0.319129	4.85479	6.10273	0.0176727	0.0377285
	APBA3	0.563227	3.26221	2.25821	0.140444	0.211969
	MKS1	0.374402	2.9577	4.31565	0.0439606	0.0808557
	ABHD5	-0.171585	4.75171	0.586739	0.447998	0.541953
	ANOS1	-4.4798	4.66973	104.636	6.18065e-13	4.91735e-11
	AKAP8L	0.314139	5.71632	4.5976	0.0378932	0.0713974
	MBTD1	0.239278	4.06548	1.2991	0.260882	0.352936
	UTP18	-0.61654	3.69818	11.4439	0.00157042	0.00484993
	RNF216	0.192733	5.45992	1.79175	0.187967	0.269888
	TTC19	0.224456	5.1972	2.16047	0.149108	0.222831
	PTBP1	0.143431	6.29004	0.499548	0.48363	0.576142
	DPF1	-1.78369	-0.829718	7.86368	0.0076259	0.0184736
	SYT7	4.51319	6.76537	38.0963	2.30782e-07	2.77552e-06
	LARS2	0.611411	4.42495	10.8809	0.00199396	0.00594574
	PIK3C2A	0.201491	6.66663	0.667251	0.418655	0.514349
	PLAUR	-1.2124	5.4842	8.63806	0.00534667	0.0136768
	ANLN	0.994207	3.35041	1.74853	0.19327	0.276063
	WIZ	0.0970113	4.35504	0.0963439	0.757808	0.814872
	RABGAP1	-0.369717	5.37711	9.46153	0.00369666	0.0100052
	DCN	-1.95528	7.92545	59.2629	1.55446e-09	4.0194e-08
	QPCTL	0.388668	1.9367	2.43841	0.125955	0.19368
	PPP5C	-0.127842	4.67328	0.722311	0.400241	0.496274
	CEP68	-0.701709	4.90552	22.5648	2.41778e-05	0.000141129
	MAP4K3	0.0859022	4.8812	0.213624	0.646344	0.721965
	ZBTB32	-0.389291	0.270081	0.979888	0.327936	0.423909
	TYROBP	-1.90517	4.56751	44.5042	4.44873e-08	6.86266e-07
	LDAF1	-1.42021	2.49073	17.1447	0.000164802	0.000718199
	BRCA1	0.221972	3.27005	0.380714	0.540576	0.627878
	ERCC1	-0.409724	4.50723	4.8036	0.0340385	0.0653683
	CD22	-1.60819	2.24964	11.3297	0.00164789	0.00505538
	SEMA3B	-2.75548	4.90364	48.8437	1.56589e-08	2.85807e-07
	MBTPS2	0.982344	3.94309	21.2988	3.72289e-05	0.000203118
	PRICKLE3	-0.0182545	2.02468	0.00502844	0.943807	0.959041
	LTF	0.519836	5.87804	0.450599	0.505753	0.596846
	EXTL3	-0.0199907	4.69775	0.00990226	0.92121	0.942961
	NR1H4	7.79686	4.87074	172.752	2.02434e-16	8.56047e-14
	ELOVL5	0.671104	6.20692	9.49279	0.00364583	0.00989224
	ALOX5	-1.17796	5.34156	9.87417	0.00308207	0.00858787
	KDM5D	2.2168	5.34419	4.43272	0.0413214	0.0767883
	CALCOCO1	-0.444444	6.5375	5.87364	0.0197901	0.0414864
	UBR7	0.145609	4.19308	0.419861	0.520559	0.610208
	MAP4K5	-0.197522	4.86247	1.23117	0.273538	0.367242
	EHD3	0.48344	3.4253	1.89432	0.176063	0.255706
	PSMC4	0.625767	5.05051	7.41017	0.00942522	0.0220861
	MAN2B2	0.31417	5.57273	2.60234	0.11425	0.178488
	CLDN11	-1.38717	1.24017	25.9471	7.97691e-06	5.56028e-05
	SLC25A39	0.831781	4.95079	7.25703	0.0101311	0.0234356
	MVP	-0.582246	6.96224	3.98616	0.0524321	0.0939082
	NUB1	-0.0176892	5.0992	0.0152744	0.902234	0.929097
	PGM3	1.22905	6.09347	21.2394	3.79986e-05	0.000206487
	RWDD2A	0.922081	2.43226	10.1491	0.00273335	0.0077616
	CLK1	0.700526	6.89648	8.47102	0.00576835	0.0145752
	POLR3B	0.91613	3.57369	19.7824	6.32416e-05	0.000317106
	ANGEL1	0.651108	4.69467	9.06976	0.00440151	0.011588
	RNF14	0.611054	4.54475	15.5595	0.000300202	0.00119904
	DNASE1L1	-0.220954	3.59573	1.29903	0.260896	0.352936
	DDX11	-0.134162	3.54648	0.16738	0.684545	0.754737
	HEBP1	0.246836	3.87095	1.94113	0.170929	0.24972
	GPRC5A	-2.7786	7.73015	26.0834	7.63783e-06	5.36526e-05
	MAMLD1	1.49875	2.96425	13.1717	0.000769625	0.00265759
	CD6	-1.5647	1.88784	14.2141	0.000507228	0.00186887
	TACC3	-0.761812	3.87342	4.87549	0.0327953	0.0632774
	UFL1	0.779989	4.98453	5.86647	0.0198606	0.041586
	POLA2	0.427675	3.64052	3.92424	0.0542161	0.0966174
	ZC3H3	0.949407	3.97151	7.12978	0.0107606	0.0246514
	CAPN1	-0.505904	5.85096	3.02365	0.0894381	0.14624
	ACP3	-1.52948	1.88439	12.7375	0.000918267	0.00308232
	MDH1	1.04845	5.47725	9.31579	0.00394375	0.0105594
	SLC30A9	0.452835	5.18735	3.43456	0.0709311	0.120568
	MTMR11	0.191455	2.87938	0.433824	0.513739	0.604367
	COX15	0.843191	4.65266	33.4337	8.36143e-07	8.29271e-06
	CCDC88C	-1.58444	5.09119	20.2935	5.28131e-05	0.000273575
	YAF2	0.410113	4.30439	4.27322	0.0449623	0.0824466
	ZMYND11	-0.126496	5.92612	0.54432	0.46478	0.557859
	WAS	-0.342711	3.55137	1.12725	0.294475	0.38924
	DPEP1	-0.126939	-0.730325	0.0373341	0.847725	0.886243
	BID	0.671965	3.89635	6.10604	0.0176439	0.0376746
	MATR3	-0.199464	7.24432	0.982972	0.327185	0.42318
	NPC1L1	6.71791	4.67195	114.546	1.55822e-13	1.52453e-11
	XYLT2	-0.517437	3.76373	3.04164	0.0885228	0.145007
	RGPD5	0.188527	5.9093	0.591669	0.44611	0.540438
	NUDCD3	-0.0628194	5.51227	0.129251	0.721024	0.785782
	CHDH	2.83799	5.28025	87.4015	8.64429e-12	4.26713e-10
	IL20RA	-4.00291	2.09535	75.3964	6.77055e-11	2.60277e-09
	GLT8D1	0.438751	3.81703	6.81115	0.0125277	0.0280431
	ATP2C1	-0.650363	5.80168	11.1327	0.00179127	0.00542777
	IGF1	2.82331	6.0484	54.2728	4.55021e-09	1.01261e-07
	SLC38A5	-1.49862	2.42314	11.6514	0.00143925	0.00450829
	RALBP1	-0.487921	5.56773	11.6925	0.00141468	0.00444673
	RUFY3	0.830422	6.38186	10.7085	0.00214666	0.00632897
	CNTN1	-2.70293	1.45192	32.2397	1.17853e-06	1.10717e-05
	SLC11A1	-0.43606	6.99791	0.89826	0.34871	0.445004
	WWTR1	-1.07183	5.75695	31.2448	1.57582e-06	1.40332e-05
	AGPS	-0.189447	5.18436	0.863513	0.358106	0.454752
	STEEP1	-0.769422	3.20387	13.2713	0.000739264	0.0025654
	ATP1A2	-0.426861	2.83225	0.850957	0.361589	0.458142
	TTC27	0.0324655	3.16447	0.0355873	0.851286	0.889238
	ZNF582	-0.489836	0.398073	3.8825	0.0554561	0.0983592
	VSIG2	-2.93665	2.80444	44.311	4.66632e-08	7.14756e-07
	PHLDB1	-1.46348	6.07617	30.8948	1.74714e-06	1.53449e-05
	MARCO	-1.80881	6.58585	20.9478	4.20334e-05	0.000224979
	CYP24A1	0.126181	1.70747	0.025743	0.873304	0.90696
	PRDM11	-2.03994	3.40769	71.3868	1.41287e-10	4.91786e-09
	SYT13	0.810536	0.291999	1.46323	0.23323	0.322249
	SNAI2	1.22972	3.64575	7.97684	0.0072366	0.0176625
	CD74	-1.92033	9.34742	26.5843	6.51685e-06	4.67457e-05
	HGF	1.43018	5.46444	24.6411	1.21506e-05	7.92528e-05
	ZRANB1	0.834181	5.67251	10.4324	0.00241747	0.00699354
	NCDN	-0.439425	3.28903	1.61415	0.210953	0.296717
	ADGRA2	-1.583	4.25296	19.163	7.88568e-05	0.00038317
	ZFP64	0.53558	2.96382	8.52176	0.00563662	0.0142996
	MNAT1	-0.415063	2.81255	2.89646	0.0962205	0.155361
	SAMD4A	0.433053	6.30345	3.78899	0.0583494	0.102619
	RUNX3	-1.0486	2.97823	8.67535	0.00525707	0.0134889
	MRE11	-0.0875636	4.23311	0.289386	0.593474	0.675626
	PLEKHB1	-2.37103	2.17641	55.1617	3.74233e-09	8.60868e-08
	SERPINB1	-0.43888	6.01819	2.25008	0.141142	0.212815
	CYP3A43	4.61532	0.656638	20.1143	5.62457e-05	0.000288331
	SLC7A9	4.85379	1.78808	93.7555	3.14209e-12	1.82966e-10
	SPAST	0.232325	3.95168	1.38461	0.245991	0.33633
	NRXN3	-1.6822	2.07714	24.8348	1.1409e-05	7.4933e-05
	OSBPL5	-1.10645	3.89358	9.40808	0.00378531	0.010207
	AQR	0.298954	5.37544	2.85547	0.0985282	0.158231
	CPS1	8.75836	9.76357	170.944	2.41758e-16	9.72406e-14
	C8B	6.20327	7.01549	109.053	3.30706e-13	2.95594e-11
	FHL1	-0.259452	6.55776	0.280368	0.599268	0.680652
	RTF2	-0.44659	4.9933	10.2354	0.0026328	0.00751438
	NLRP2	-5.41154	4.35659	31.7906	1.34296e-06	1.23232e-05
	SLC45A4	-1.82868	3.68524	34.1494	6.82534e-07	7.00928e-06
	RNF10	0.254318	6.29055	2.33926	0.133701	0.203718
	ZNF839	0.508924	3.11177	5.13721	0.0286693	0.0566706
	ZDHHC6	0.697906	4.77908	14.4479	0.000462539	0.00173123
	GRAMD1B	1.35341	4.18041	6.38889	0.0153635	0.0334198
	RNH1	-0.72514	6.03696	4.67993	0.0362983	0.0688559
	NDUFS1	1.28844	6.73253	49.8703	1.23245e-08	2.31764e-07
	RB1CC1	0.671307	6.50017	4.57677	0.0383088	0.0720716
	ERP44	1.04636	5.54044	24.8263	1.14404e-05	7.51167e-05
	ALAS1	1.82919	6.38206	49.1275	1.46516e-08	2.70836e-07
	BIRC3	0.546963	7.246	1.08114	0.304436	0.399344
	AKAP11	-0.168244	6.04839	0.717187	0.401903	0.497766
	GLRX2	0.456176	3.59356	3.33762	0.0748768	0.126062
	SNAPC1	-0.653991	2.40538	6.69419	0.0132523	0.0294525
	DERA	1.12772	3.84285	14.6744	0.000423196	0.00160276
	STRAP	0.094448	4.71701	0.224673	0.637975	0.7146
	ABCC2	5.91631	7.27399	99.0653	1.39857e-12	9.31541e-11
	DEF6	-1.19097	3.57552	16.0554	0.000248342	0.0010212
	PLEKHO1	-1.1039	4.41094	24.6952	1.19388e-05	7.79648e-05
	GCLM	1.47662	4.64596	19.7849	6.31845e-05	0.000317043
	UBR2	0.331839	6.18705	3.2178	0.0800956	0.133442
	EHD2	-1.50444	5.72596	19.8441	6.18744e-05	0.000311596
	DEPDC1	1.5391	1.25744	4.03191	0.0511556	0.0919784
	CCDC28A	0.353532	3.20656	1.95802	0.169121	0.24751
	RRAGD	-0.274031	4.27555	1.25628	0.268771	0.361829
	HSF2	0.050339	2.5556	0.0311298	0.860805	0.897499
	PHF20	-1.03064	5.13619	58.6307	1.77562e-09	4.49493e-08
	HSD17B6	1.97097	5.90483	21.522	3.44771e-05	0.000190255
	NR1H3	1.06848	4.70493	10.0933	0.00280064	0.00792366
	TYMP	-0.245035	6.48396	0.394213	0.533517	0.621807
	NCAPH2	-1.22694	4.22976	12.574	0.000981818	0.00326371
	TOMM34	-0.177108	3.5075	0.431531	0.514848	0.605343
	SEC63	0.456838	5.91905	2.40314	0.12865	0.197141
	KPNA6	0.766667	6.5072	23.573	1.72591e-05	0.000106406
	VIM	-2.04482	8.7122	59.843	1.37688e-09	3.62496e-08
	RTEL1-TNFRSF6B	0.0921847	4.20187	0.0415822	0.83941	0.879371
	FAS	0.37665	5.6896	3.14966	0.0832438	0.137851
	RNASET2	-0.154741	5.27389	0.312649	0.57905	0.662434
	CD44	-1.59364	7.59175	26.7809	6.12528e-06	4.43175e-05
	AGPAT4	-1.06959	4.33533	21.7431	3.19609e-05	0.000179168
	SLAMF7	-0.78837	3.54266	3.34306	0.074649	0.125727
	BTN3A1	-0.643188	4.98919	5.25899	0.0269443	0.0537499
	MIPEP	0.351062	2.82784	2.69053	0.10847	0.171082
	PRKCH	-1.77749	5.22695	69.0237	2.20726e-10	7.34178e-09
	IFNGR1	0.286235	6.62584	0.774831	0.383772	0.48024
	B4GALT7	0.285155	3.43045	1.08784	0.30296	0.397841
	SH2D2A	-0.854282	1.43585	5.4216	0.0248136	0.0501723
	VRK2	-0.202237	3.33398	0.815822	0.371594	0.468359
	TNFRSF1B	0.484774	6.30783	1.86283	0.179619	0.259811
	VEZT	0.288076	5.31396	2.15055	0.150021	0.223902
	POU2F2	-0.0431156	3.2621	0.0125478	0.911348	0.935761
	BRD9	-0.491647	4.93029	7.48314	0.00910753	0.02149
	SNX1	-0.847234	6.38536	42.993	6.48243e-08	9.47499e-07
	TBPL1	0.116184	2.04698	0.157267	0.693708	0.762555
	BMAL2	2.34206	4.23819	45.8438	3.20461e-08	5.26506e-07
	BCLAF1	-0.237921	6.8626	1.16545	0.286543	0.38089
	SLC39A9	1.04431	5.95386	25.5127	9.16618e-06	6.23714e-05
	ANK1	-0.190501	1.40491	0.248711	0.620605	0.699582
	TFB1M	0.984023	2.45686	19.8146	6.25249e-05	0.000314434
	RABEP1	0.00692646	5.39461	0.00162547	0.968033	0.976168
	HMGB3	1.1472	5.17795	3.79907	0.0580299	0.102165
	NUP160	-0.252562	4.91656	3.89908	0.0549598	0.0976624
	BAK1	-0.256995	2.93736	0.713684	0.403045	0.498982
	MUSK	-1.08176	1.89809	10.8786	0.00199585	0.00595057
	IKZF2	-0.618853	3.71737	6.77264	0.0127615	0.0284842
	GRN	-1.67288	7.53869	22.9948	2.09252e-05	0.000125205
	FAM13B	-0.458299	4.85727	4.53686	0.0391187	0.0733286
	ARHGAP31	-1.54308	6.21351	52.4097	6.8963e-09	1.43337e-07
	CENPQ	-0.143765	0.51745	0.102229	0.750767	0.808961
	SARS1	0.270728	6.35295	1.14016	0.291761	0.386571
	RANBP3	-0.498688	4.62459	5.15303	0.0284386	0.0562915
	ARID4A	-0.234153	5.10331	1.0084	0.321078	0.416761
	EIPR1	0.275417	2.79622	1.46437	0.233052	0.322086
	PNPLA6	-1.2544	5.58665	9.24522	0.00406965	0.0108391
	IFT88	1.12707	3.75836	14.8467	0.000395637	0.00151369
	ALG1	0.105606	3.42281	0.343854	0.560774	0.646566
	ZCCHC8	0.571756	4.49773	14.7349	0.000413293	0.00157128
	ABCF2	-0.00915674	3.8954	0.00170112	0.967298	0.975698
	CHPF2	0.657088	5.21601	6.8917	0.0120535	0.0271466
	LRRC7	-0.910227	1.1347	2.71179	0.107127	0.169333
	FUT8	-1.38454	3.7024	21.3132	3.7044e-05	0.000202261
	UBA6	0.944256	5.72431	12.9787	0.000832301	0.00283882
	GAB2	-1.01744	5.98492	21.9654	2.96249e-05	0.000167741
	ATP6V0A1	0.634357	6.06565	24.9809	1.08811e-05	7.19225e-05
	PIAS1	-0.0172859	5.5037	0.00707264	0.93338	0.95116
	SLC4A7	-0.103399	5.08433	0.153556	0.697156	0.765416
	APBA2	-0.834437	2.23793	4.80249	0.034058	0.0653943
	MAP2K3	0.587942	5.3903	3.02853	0.0891889	0.145927
	CLXN	-3.41927	0.709484	47.7665	2.01927e-08	3.56864e-07
	TMSB10	-1.798	7.81923	52.0506	7.47899e-09	1.53104e-07
	ASTE1	0.178395	2.08806	0.616098	0.436938	0.531848
	RNF19A	0.645048	6.55232	4.10589	0.0491628	0.088918
	PEX3	1.20314	3.26464	17.8506	0.00012694	0.000577531
	GABARAPL2	-0.539696	4.18113	12.3284	0.00108619	0.00355624
	MYOC	-3.74964	0.131775	33.0705	9.27595e-07	9.04686e-06
	SH3YL1	-0.793232	4.26363	27.8645	4.36801e-06	3.3376e-05
	FAM136A	0.983798	3.87474	28.3077	3.81013e-06	2.98149e-05
	VCL	-1.1366	6.93653	41.0039	1.07557e-07	1.43939e-06
	DEPDC1B	-1.40559	0.794344	3.46141	0.0698793	0.119153
	DAPK2	-1.5527	4.97894	24.3649	1.32972e-05	8.55242e-05
	NSMAF	-0.241111	4.0255	2.664	0.110173	0.173202
	ADSS2	-0.467256	4.41821	6.19664	0.0168762	0.0362656
	STAP1	-1.79194	-0.677316	15.3051	0.000331129	0.00130269
	TIMP2	-0.891082	6.87509	10.2671	0.00259681	0.00742767
	RFC1	0.569149	5.55231	6.47736	0.014717	0.0322326
	TBC1D23	0.325349	4.75664	1.90499	0.174876	0.254306
	CUL3	0.111146	5.29915	0.287415	0.59473	0.676772
	MYOM2	2.43521	3.26403	10.0845	0.00281136	0.0079519
	OTC	6.67843	3.75564	100.433	1.14111e-12	8.09963e-11
	CYP46A1	-0.392294	0.876083	0.964986	0.3316	0.427642
	ZZZ3	0.713575	5.33835	9.15355	0.00423958	0.0112201
	USP2	1.00103	2.12308	7.05984	0.0111243	0.0253615
	TUBG2	1.02871	3.11703	20.5372	4.84922e-05	0.000254286
	RPL26L1	0.145364	1.84286	0.1928	0.662864	0.736138
	FLT4	-1.16841	4.18397	14.8526	0.000394731	0.00151103
	NSUN2	0.802343	5.46659	28.6321	3.44942e-06	2.74941e-05
	FBXO42	0.621036	4.95632	7.43093	0.00933364	0.0219045
	MFAP3	0.503332	4.78316	8.14514	0.00669624	0.016535
	MRI1	-0.0844601	3.64728	0.0833477	0.774241	0.828074
	METTL1	-0.262851	1.88077	1.0614	0.308835	0.404066
	AGA	0.482303	2.64306	5.64698	0.022156	0.0455837
	PI4K2B	0.657229	4.68717	6.64912	0.0135433	0.0300102
	BOD1L1	-0.013747	6.92708	0.00433525	0.947818	0.962126
	MAT2B	-0.0678791	4.4325	0.129638	0.720625	0.785415
	TLL1	-1.42899	1.85394	13.0827	0.000797883	0.00273863
	EDC4	0.113027	5.14592	0.223346	0.638967	0.715563
	TRIO	0.251172	7.40899	2.06455	0.158221	0.234162
	VCAN	-0.0609237	7.78001	0.0293725	0.864751	0.900445
	CLEC16A	0.221269	5.6046	1.64396	0.206866	0.291895
	MSR1	-2.59149	5.97809	86.7133	9.67488e-12	4.72221e-10
	CDH1	0.0698678	6.79672	0.0609088	0.806276	0.853385
	MTREX	-0.171316	5.09048	0.845279	0.36318	0.459716
	DNAH5	0.37785	5.38995	0.93379	0.339452	0.435622
	ZFYVE16	0.106226	5.8484	0.192283	0.663287	0.736533
	RIPOR1	-0.615073	5.16268	4.3095	0.0441043	0.0810857
	C6	6.15964	7.60236	85.8011	1.12432e-11	5.37889e-10
	RAI14	-0.120788	5.62263	0.470428	0.496587	0.588427
	PNKP	-0.636886	4.11706	4.40642	0.041899	0.0777219
	PHLPP2	0.148592	3.98095	1.06513	0.307998	0.403238
	SPDL1	0.168599	2.01705	0.230207	0.633878	0.711133
	STAU2	0.45832	4.67839	3.95397	0.0533513	0.0953266
	SLC66A1	0.210042	2.82901	0.561565	0.457838	0.550866
	CTNS	0.513278	3.82153	5.11358	0.0290176	0.0572548
	RTN4R	1.19827	1.08826	5.92917	0.0192528	0.0405535
	PHF23	-0.362211	3.59711	2.89849	0.096108	0.155202
	INPP4A	-0.164343	5.02293	0.996281	0.32397	0.419946
	RAB27B	-0.92721	3.6882	3.57418	0.0656476	0.113245
	PSMA4	0.332462	4.93549	1.56163	0.218396	0.305327
	MYO16	0.0212907	1.81048	0.0049661	0.944156	0.959229
	LSG1	0.679784	5.24157	14.2921	0.000491841	0.00182207
	PARP3	0.447899	3.52389	3.65614	0.0627502	0.109035
	TNC	0.781635	8.2033	1.49457	0.228374	0.316809
	THAP3	0.160917	2.29611	0.223246	0.639042	0.715574
	RIPOR3	0.129668	3.97179	0.14213	0.708085	0.774401
	TDP1	0.232663	2.96211	1.26756	0.266664	0.359525
	AIFM2	0.940634	3.82459	12.4119	0.00104945	0.00345468
	SPATA7	-0.0205153	2.28328	0.00620747	0.937579	0.954196
	MED17	-0.0445588	4.1398	0.112579	0.738909	0.799815
	RETSAT	1.75239	5.89568	45.2211	3.73006e-08	5.95275e-07
	CAPG	-3.02391	5.32418	50.7896	9.96907e-09	1.95274e-07
	AP2S1	-0.00394081	3.97635	0.000209921	0.988509	0.991414
	USH2A	1.18287	1.07823	5.51079	0.0237229	0.0482715
	TG	0.885396	1.28345	4.65599	0.0367545	0.0695907
	ADAM28	-0.450998	2.8816	1.39804	0.243751	0.333939
	DCUN1D1	0.464557	4.88686	2.71692	0.106806	0.168886
	JADE2	-1.33504	4.97913	37.9767	2.3829e-07	2.85475e-06
	LCP2	-0.305847	5.05792	1.31774	0.257542	0.349395
	TRIT1	0.49986	3.09997	8.39472	0.00597258	0.0150161
	ADRB1	-2.34598	2.6778	57.8831	2.0804e-09	5.14064e-08
	CUL7	-0.414346	4.62684	2.31363	0.135792	0.206151
	CTNNA1	-0.236532	7.7992	1.636	0.207948	0.293155
	PHKA2	2.79921	6.4924	94.4678	2.81356e-12	1.67426e-10
	CNTLN	1.10164	4.55181	16.0713	0.000246836	0.00101559
	EPHA3	-0.236884	2.4928	0.386653	0.537449	0.625096
	HSPA5	0.637838	8.18256	4.52779	0.0393054	0.0736044
	DSG2	0.115911	5.35003	0.118352	0.732558	0.794358
	GEMIN8	0.0538751	2.38534	0.0787712	0.780358	0.832811
	OFD1	0.303452	5.24423	2.72966	0.106012	0.167925
	GPM6B	-1.47971	3.04151	21.4047	3.58955e-05	0.000196882
	PREX2	-1.93691	4.7522	63.7297	6.21838e-10	1.85128e-08
	WDR37	0.625676	4.57338	16.823	0.000185846	0.000795855
	YTHDC2	0.617173	5.40431	11.2215	0.00172506	0.00525595
	CTPS2	0.541215	3.71313	7.99457	0.00717755	0.0175361
	ATP6V1H	-0.268761	3.95681	2.46183	0.124202	0.1915
	POLR2B	0.511859	5.77554	5.23252	0.0273094	0.0543635
	ATOSA	0.874491	5.21945	13.3103	0.000727719	0.00253221
	ARAP2	-1.07607	5.76137	28.9204	3.15901e-06	2.55069e-05
	TPR	0.00484475	7.25187	0.00043882	0.983387	0.987707
	CP	7.61175	10.8272	115.973	1.2873e-13	1.30047e-11
	KATNIP	-0.295951	4.53399	2.33873	0.133744	0.203754
	DTNBP1	-0.53908	2.61098	9.22201	0.00411197	0.0109317
	XK	0.304289	1.53143	0.776563	0.383246	0.47972
	ANO2	-2.04119	2.85019	32.6379	1.05038e-06	1.00459e-05
	C12orf4	0.0377669	3.17534	0.0358934	0.850655	0.888707
	SCML1	1.77848	4.72602	23.7242	1.64164e-05	0.000102197
	WWC3	-1.46641	5.59348	24.9975	1.0823e-05	7.16257e-05
	ARHGAP6	-2.1409	3.35315	62.8868	7.36931e-10	2.137e-08
	MAP4	0.473393	7.7702	7.70584	0.0082066	0.019685
	GOPC	0.105506	4.66059	0.353792	0.555189	0.641526
	ROS1	-2.05262	6.24104	8.82884	0.00490481	0.0127127
	USP28	1.30074	4.23971	35.3891	4.82492e-07	5.20085e-06
	HDAC9	-1.0474	2.51763	12.7892	0.000899055	0.00302912
	TSPAN17	0.0723202	3.86624	0.09198	0.763183	0.819288
	NOP16	-0.234571	2.86487	0.676198	0.415577	0.511436
	CC2D2A	-0.516728	4.40972	4.71955	0.035557	0.0676955
	RRM2B	-0.0139831	4.66566	0.00251125	0.960272	0.970775
	ZNF800	0.0281567	4.79736	0.0132523	0.908904	0.934089
	SNX29	-0.605979	5.03593	10.3996	0.00245199	0.00707811
	LMO3	-1.17155	5.21003	5.46966	0.0242193	0.0491308
	MRPS10	1.29253	4.01384	24.2673	1.37288e-05	8.77803e-05
	RSF1	-0.527869	5.78781	7.01497	0.0113645	0.0258386
	VPS13D	0.681815	7.83024	34.636	5.95236e-07	6.22762e-06
	CELF2	-1.32842	5.95351	27.0721	5.59004e-06	4.10327e-05
	FAM120A	0.698545	6.94261	22.9768	2.10517e-05	0.000125809
	R3HDM1	0.889776	4.02594	24.5687	1.24408e-05	8.08059e-05
	COL9A2	-1.71306	1.92214	9.88054	0.00307348	0.00856945
	KITLG	-2.17342	4.35614	28.3931	3.71147e-06	2.91971e-05
	ERCC8	0.1854	4.067	1.05343	0.310637	0.405788
	ADAMTS6	0.155745	1.54305	0.260159	0.612701	0.69264
	H6PD	1.77396	8.08966	28.6561	3.42422e-06	2.73333e-05
	VAMP3	-0.39093	5.23076	4.65705	0.0367341	0.0695671
	PER3	0.47853	5.07848	2.54021	0.118533	0.184106
	TNFRSF9	-1.20215	1.32796	7.24927	0.0101683	0.0235104
	LTBP1	-1.13953	5.61015	17.4448	0.000147431	0.000654311
	RCN1	-0.289935	5.8084	0.853018	0.361014	0.457588
	ELN	-2.60259	5.28133	21.2812	3.7455e-05	0.000204095
	RFC2	0.650584	3.33632	4.73554	0.0352626	0.0672671
	ARID1B	0.216227	6.95686	2.78713	0.102516	0.1634
	CLPTM1L	1.2148	6.21456	20.6662	4.63572e-05	0.000245102
	NEDD4L	-0.616412	7.2997	7.06752	0.0110837	0.025285
	FOXP3	2.41975	1.53294	12.52	0.0010038	0.0033261
	PPP1R3F	-0.33456	1.70963	0.671427	0.417214	0.513072
	HEXB	-0.431984	5.62698	3.30172	0.0763996	0.128159
	PTCD2	1.26769	3.42528	22.554	2.42664e-05	0.00014157
	NEXMIF	-2.0748	0.799505	24.3685	1.32815e-05	8.54488e-05
	JKAMP	0.692679	3.72269	6.54571	0.0142374	0.0313502
	DKK3	-1.5931	5.32822	17.6639	0.000135967	0.000610167
	ARHGEF5	-0.276149	5.02881	1.27735	0.264852	0.357659
	NFE2L3	0.00930765	4.85982	0.000602121	0.98054	0.985805
	MCUR1	-0.14753	3.87672	0.578283	0.451265	0.544769
	LIMA1	-0.995513	5.7492	14.8132	0.000400845	0.00153011
	LETMD1	1.09991	4.77789	47.3969	2.20496e-08	3.84136e-07
	SLC4A8	-2.02952	2.37652	61.5718	9.6318e-10	2.66161e-08
	LAMC3	-1.00698	4.28477	4.8795	0.0327274	0.0631969
	PTGER3	-1.79838	0.854993	16.0238	0.000251343	0.00103159
	TNIP3	-0.492285	2.73121	0.445975	0.507933	0.5988
	MAPK9	0.608924	4.44573	12.3463	0.00107818	0.00353639
	COL23A1	-0.242888	0.778982	0.367566	0.547621	0.634398
	BCAR1	0.917007	5.78591	5.47653	0.0241357	0.0489886
	FHIP1B	0.524925	4.74245	3.3764	0.0732695	0.123845
	HERPUD1	0.549246	6.25456	6.4944	0.0145958	0.0320093
	HOMER3	-0.40153	2.4988	0.956411	0.333733	0.429832
	RAD51	-1.34138	0.588197	6.63159	0.0136584	0.0302375
	POLQ	1.03466	2.58908	2.68662	0.108719	0.1714
	PIK3CB	0.80776	5.0208	15.8276	0.000270878	0.00109854
	CYBA	-1.39869	5.51723	12.2011	0.00114483	0.00371519
	THOC3	0.0287418	3.17872	0.0109332	0.917225	0.939944
	HEBP2	1.43653	5.66872	34.7026	5.84231e-07	6.12723e-06
	MPHOSPH9	1.71479	4.70721	48.1009	1.86534e-08	3.34008e-07
	PLEKHA5	0.783635	5.85374	7.56056	0.00878292	0.0208395
	PRSS8	-0.934661	4.92002	4.54273	0.0389984	0.0731472
	SIKE1	0.897721	4.42095	15.3169	0.000329616	0.00129744
	RRP12	-0.292296	4.53094	0.926303	0.341374	0.437559
	FNIP2	0.667581	7.00516	6.99336	0.0114822	0.02606
	MSMO1	2.99871	7.27772	37.714	2.55702e-07	3.03323e-06
	TTC17	0.581662	6.2383	9.87633	0.00307915	0.00858304
	ALX4	-1.95259	-0.237863	30.8801	1.75471e-06	1.53865e-05
	FSTL4	-1.93675	0.0320964	22.3677	2.58423e-05	0.000149083
	FOXN3	0.165511	6.64688	0.899238	0.34845	0.444752
	METTL24	-0.25014	0.670275	0.790515	0.379046	0.475613
	AKR7A2	0.387358	3.4211	2.1132	0.15352	0.228293
	MRTO4	0.0399861	3.65306	0.0258199	0.873117	0.906809
	NNAT	0.648864	1.47533	5.10675	0.0291191	0.0574083
	USE1	-0.442457	2.33924	6.04027	0.0182247	0.0387396
	MCF2L2	-0.239039	1.8912	0.339162	0.56345	0.648825
	NRIP2	-0.0966002	1.74965	0.102215	0.750784	0.808961
	LAMA3	-2.85832	5.92445	53.7558	5.10241e-09	1.11269e-07
	AP5M1	0.790009	4.70715	10.1132	0.00277649	0.00787072
	ANAPC4	0.316643	4.10352	2.85968	0.0982886	0.157995
	KCNQ1	-1.32699	3.11493	9.67686	0.00336119	0.00924701
	TRAPPC3	0.000446764	4.06573	1.0904e-05	0.997381	0.998392
	THRAP3	-0.238704	6.95039	2.51331	0.120445	0.186608
	PHPT1	0.532593	3.83596	3.82099	0.0573412	0.101125
	LY75	-1.57194	3.18692	26.0188	7.79671e-06	5.45218e-05
	ARID4B	-0.713253	5.84622	17.352	0.000152584	0.000672782
	OPN3	0.637678	3.93885	5.11879	0.0289404	0.0571234
	SDCCAG8	-0.546213	4.64162	6.44587	0.0149437	0.0326408
	PTPRN	-0.192345	0.489173	0.0572385	0.812087	0.857822
	HHAT	-0.367025	2.3405	2.20141	0.145405	0.218144
	KIF1B	0.602284	6.89362	20.453	4.99407e-05	0.000260811
	FOXC1	-1.38956	1.65972	15.9554	0.00025798	0.00105326
	TBC1D22A	-0.477294	4.24309	4.17393	0.0474051	0.0861118
	SYNE2	0.317966	8.83822	1.38334	0.246205	0.336558
	PLEKHH1	0.521388	2.85146	2.49977	0.12142	0.187824
	ATP9A	-0.456141	5.40386	5.19131	0.0278886	0.0553591
	CHRDL2	2.24317	0.905605	15.5627	0.000299828	0.00119821
	FAM168A	0.179787	5.48803	1.11557	0.296955	0.391833
	RELT	-0.46115	4.31975	1.42068	0.240031	0.330006
	GALC	-0.551184	4.46001	8.87491	0.00480402	0.0125007
	NOP58	-0.223229	4.89846	0.607448	0.440152	0.534615
	SZRD1	-0.0542647	5.7316	0.0800341	0.778651	0.83148
	KCNH2	-1.58096	0.500576	13.7562	0.000608478	0.00218232
	CUL1	0.901766	5.55741	15.028	0.000368663	0.00142378
	FAM114A2	0.148117	3.88302	0.931578	0.340018	0.43622
	CYFIP2	1.32859	5.62882	42.5728	7.20688e-08	1.02983e-06
	TAB2	1.0562	5.69058	21.3227	3.69232e-05	0.000201734
	GINM1	-0.201705	4.34897	0.785935	0.380417	0.477005
	EIF2AK2	-0.433826	6.11907	3.91672	0.0544373	0.0969084
	USP36	-0.245278	5.57231	1.24331	0.271219	0.364558
	KMT2C	0.74635	8.56261	19.792	6.30269e-05	0.000316441
	MCOLN3	-1.8872	2.02551	20.6218	4.70804e-05	0.00024808
	CCDC85A	-3.42186	2.61596	48.7188	1.61246e-08	2.93567e-07
	PUM2	0.151913	6.30787	0.644102	0.42678	0.52235
	MRPL43	0.371864	3.47165	6.20822	0.0167808	0.036087
	ITIH4	9.54873	10.5067	249.398	3.36435e-19	8.81707e-16
	ITIH1	11.8032	8.49569	208.627	7.92115e-18	7.48032e-15
	HPF1	0.327897	1.78441	1.45643	0.234302	0.323359
	ZFR	0.337255	5.986	3.35366	0.0742072	0.125129
	ZNF280C	-0.240372	2.17172	1.32962	0.25544	0.347221
	TRAF1	1.30454	4.58529	7.34835	0.00970366	0.0226093
	RC3H2	0.181999	5.79751	1.37151	0.248203	0.338905
	IL17RB	3.46367	4.45964	98.4787	1.52706e-12	9.96027e-11
	TRAF3IP2	0.240826	4.79608	1.10633	0.298938	0.393737
	GYG2	3.24166	2.45895	55.0041	3.87378e-09	8.83809e-08
	DCBLD2	-0.169972	5.01153	0.631512	0.431302	0.526581
	SERPINB3	2.74471	1.83522	3.45307	0.070204	0.119613
	SOAT1	-0.947752	5.24649	18.2657	0.000109053	0.000506706
	PKP2	1.76941	5.05964	21.6325	3.31942e-05	0.000184488
	F7	6.11315	4.44049	99.7062	1.27106e-12	8.76428e-11
	GDI2	0.705758	6.70618	6.46061	0.0148371	0.0324565
	PRDM1	-1.21936	4.54462	9.3965	0.00380482	0.0102507
	ATG5	-0.108693	3.96757	0.386361	0.537602	0.625096
	TMCC3	-0.67563	3.87323	8.45599	0.00580797	0.0146481
	PITHD1	0.0352666	4.38857	0.0391531	0.844107	0.883184
	MTA3	-0.486369	3.80058	10.213	0.00265848	0.0075797
	USP13	-0.0970902	5.06871	0.232974	0.631852	0.709681
	ATP11B	0.167115	6.05812	0.607883	0.43999	0.534454
	LAMC2	-1.80462	5.46297	11.8438	0.00132801	0.00421579
	CDK14	-0.23239	4.58632	1.49361	0.228521	0.316932
	SEC61A1	1.0945	7.7826	31.6587	1.39573e-06	1.27268e-05
	PPP1R12A	-0.600851	6.11201	10.2985	0.00256173	0.00734629
	RASGRF1	-2.09265	3.28016	9.92065	0.00301997	0.00844083
	CAMK2B	1.40018	1.08525	5.85997	0.0199247	0.0417017
	CROCC	-1.56509	4.22397	27.6939	4.60509e-06	3.48997e-05
	POLR3E	0.495078	4.95841	9.28552	0.00399725	0.0106777
	ATP2B4	-0.15245	7.86346	0.466185	0.498524	0.590207
	ZC3H11A	0.642912	6.23471	13.1182	0.000786498	0.00270339
	RIOK2	-0.0826151	3.26262	0.0958202	0.758446	0.815472
	YIPF1	1.72536	4.14825	50.5539	1.0524e-08	2.04091e-07
	NDC1	1.02174	3.35956	9.62115	0.00344477	0.00943034
	DGKG	-0.750059	2.84715	9.17052	0.00420756	0.0111517
	FLYWCH1	-0.802913	4.2806	4.99366	0.0308577	0.0601966
	UNKL	-0.168609	3.15973	0.247062	0.621762	0.700414
	TBXAS1	-0.564695	4.33013	2.6784	0.109245	0.172042
	PARP12	0.508345	5.10375	4.42105	0.0415767	0.077223
	ALDH18A1	0.884638	4.8318	13.2881	0.00073428	0.00255136
	TARBP1	-0.361209	4.52823	3.57535	0.0656054	0.11319
	GATB	0.552101	3.27579	7.89579	0.0075132	0.0182511
	MXD1	0.478596	6.09413	1.98384	0.166399	0.244103
	CDK17	0.0647432	5.29066	0.0808839	0.777511	0.830578
	DNAJC25	1.84628	3.62203	54.0683	4.76072e-09	1.04765e-07
	SLC2A3	-0.681486	7.58724	3.02025	0.0896123	0.146476
	PSD	-0.257814	1.37428	0.386497	0.537531	0.625096
	CTDP1	-0.515327	4.3728	3.47372	0.0694031	0.118593
	YBX3	-1.33331	6.59455	23.2203	1.94068e-05	0.000117414
	STYK1	-1.02412	-0.107715	3.88193	0.0554733	0.0983816
	WNK1	0.600737	8.34776	11.1239	0.00179791	0.00544411
	CCAR1	0.537675	5.61407	5.13846	0.0286509	0.0566446
	OGFR	-0.227087	5.47852	0.599793	0.443027	0.537422
	GNA15	-0.907413	3.36244	4.35363	0.0430848	0.0795029
	CREB3L3	10.7786	6.76806	160.379	7.03748e-16	2.18363e-13
	PIGV	1.19001	3.69834	24.068	1.46572e-05	9.28417e-05
	PTPRU	-0.793506	4.9468	4.98674	0.0309676	0.0603731
	SNRNP40	0.00654331	3.89911	0.00141465	0.970177	0.977777
	RIMBP2	-0.688558	-0.0567515	1.7145	0.197572	0.280916
	COL11A1	0.783754	1.82115	0.953001	0.334587	0.430778
	QSER1	0.611661	5.42558	8.21562	0.00648289	0.0160942
	MPC1	2.65448	5.01839	53.6249	5.2531e-09	1.1387e-07
	ACAA1	1.29243	5.89081	21.7811	3.15479e-05	0.000177243
	BCAT1	-1.38002	5.46279	18.9797	8.42188e-05	0.000404698
	HDAC7	-0.621303	5.81066	3.13198	0.0840832	0.138997
	LZTS1	-1.30274	2.37852	7.59814	0.00862981	0.0205526
	PRDM6	-1.98456	2.49168	30.8417	1.77477e-06	1.55248e-05
	SPAG4	1.20579	1.92927	5.91645	0.0193745	0.0407608
	NCKAP1	0.329379	6.5361	3.26562	0.0779657	0.130333
	MRPS35	1.40998	4.46878	26.1381	7.50611e-06	5.28469e-05
	GUCY1B1	-0.633457	3.18495	6.09117	0.0177735	0.0379066
	SFSWAP	-0.0323196	5.64769	0.0381128	0.846165	0.884783
	TNK2	-0.573268	4.73582	2.89984	0.096033	0.155092
	MON2	0.513099	6.42664	10.6395	0.00221115	0.00649002
	CDH3	0.436935	3.39658	0.351135	0.556671	0.642689
	GPBP1	0.323962	6.03694	0.994342	0.324435	0.42045
	DGAT2	3.11293	5.03248	51.5478	8.3831e-09	1.68282e-07
	ZNF112	0.013328	1.83542	0.0034756	0.95327	0.96594
	CS	1.06567	6.31131	42.3277	7.66799e-08	1.08501e-06
	LTK	-0.480943	1.42686	1.37216	0.248092	0.338775
	MRPS24	0.456876	3.49879	4.41899	0.0416219	0.0772929
	ELMO2	0.419145	4.90011	5.51554	0.0236663	0.0481934
	WAPL	0.253162	5.93636	2.21304	0.144373	0.216858
	VMP1	0.547918	8.23761	3.13621	0.0838815	0.138727
	APPBP2	-0.084777	4.76842	0.254262	0.616744	0.696445
	POLD1	-1.5126	3.14616	14.551	0.000444184	0.00167291
	SEZ6	-0.207779	0.0713243	0.316028	0.577014	0.660906
	EIF4B	-0.37347	8.19525	3.57987	0.0654417	0.112952
	SLC6A16	1.2392	1.73792	15.8203	0.000271635	0.00110073
	BICRA	-0.49898	2.68778	1.91808	0.173435	0.252548
	SPHK2	0.45809	3.04343	1.34307	0.253087	0.344621
	RPL18	-0.890216	6.78994	10.0451	0.00286016	0.00806777
	CA11	-2.55894	0.805082	94.8118	2.66798e-12	1.60522e-10
	ISOC2	1.31404	3.7865	11.9892	0.00125	0.0040062
	U2AF2	-0.638573	5.50296	8.80157	0.00496552	0.0128455
	EPN1	0.110785	5.69984	0.126018	0.724386	0.788238
	MED29	0.168236	4.70774	0.85131	0.361491	0.458085
	AHRR	-0.792848	1.11571	4.08475	0.0497234	0.0897823
	ZNF275	0.9399	4.68876	33.3393	8.58967e-07	8.48496e-06
	MTMR1	0.311149	4.26483	5.90065	0.0195268	0.0410176
	GPC1	-0.0175088	4.78919	0.00162748	0.968013	0.976168
	ADCK1	0.428494	2.20006	2.30718	0.136324	0.206742
	HAGH	0.574441	4.63982	6.2811	0.0161929	0.0349716
	RNF4	0.357643	5.17414	4.75668	0.0348773	0.0666902
	CASP8	0.141479	4.67347	0.642602	0.427315	0.522683
	LIMCH1	-2.06586	7.55548	85.633	1.15603e-11	5.51845e-10
	INTS13	0.755837	3.45533	6.0771	0.017897	0.0381251
	TM7SF3	0.267865	4.74162	1.11972	0.296072	0.390946
	SPA17	-0.876843	1.97362	9.96795	0.00295812	0.00829359
	TSPAN32	-1.96051	0.749803	26.6934	6.29644e-06	4.54169e-05
	CCN5	-1.8504	3.01913	17.6859	0.000134868	0.000606613
	ST3GAL6	1.9295	3.92808	40.4933	1.22734e-07	1.61663e-06
	ATP2C2	-2.21944	3.89853	16.9681	0.000176026	0.000758973
	NGFR	2.51203	2.44228	37.516	2.69698e-07	3.16811e-06
	CDON	-1.07526	3.52298	17.9122	0.0001241	0.000566273
	TAF2	0.590542	5.39946	11.0254	0.00187485	0.00564246
	HIPK2	1.38941	7.91364	54.7097	4.1325e-09	9.34005e-08
	TNPO3	0.38305	5.22764	8.3224	0.0061733	0.0154582
	BORCS8-MEF2B	-0.913362	0.384446	2.37254	0.131041	0.200269
	RFXANK	-0.756191	3.11837	7.80916	0.00782135	0.0188776
	TMEM161A	0.559769	2.99524	2.42421	0.127032	0.195076
	LPAR2	0.151776	2.39026	0.143411	0.706835	0.773277
	CTSA	0.850422	6.35976	13.8058	0.000596536	0.00214556
	SUGP2	0.595843	6.38632	16.4444	0.000214295	0.000899419
	SLC12A2	-1.02522	4.55771	30.0915	2.21855e-06	1.87644e-05
	SNX24	-0.258987	3.01626	2.06495	0.158182	0.234119
	EYA2	0.620066	1.24925	2.35993	0.132042	0.201515
	CNN2	-0.475113	5.90041	2.88039	0.0971177	0.156518
	ABCA7	-0.682926	4.23904	3.35234	0.0742621	0.125211
	SNCAIP	0.381195	2.53307	0.963649	0.331931	0.427993
	DDX20	0.330037	3.49995	3.32045	0.0756008	0.127025
	BTBD1	0.69198	5.19547	5.18822	0.0279326	0.0554313
	FAR2	-0.341237	3.93648	1.40936	0.241882	0.332048
	BCAS1	-1.81862	0.911179	11.3293	0.00164817	0.00505554
	CHI3L2	-1.13688	3.97235	3.50795	0.0680973	0.116674
	SBNO2	-0.407203	6.34142	1.17713	0.284175	0.378343
	PMS1	0.475872	3.44016	5.03419	0.0302221	0.0591532
	HMG20B	-1.14246	4.47946	15.1554	0.000350877	0.00136651
	CALCRL	-1.05034	5.02998	11.0534	0.00185261	0.0055856
	TAF11	0.258902	4.49069	3.75698	0.0593777	0.104141
	ANKS1A	-0.883337	5.54976	18.4945	0.000100351	0.000472597
	AP3D1	0.016821	6.57917	0.00437359	0.947588	0.961952
	ZNF76	0.119752	4.17176	0.338129	0.564042	0.649362
	NHERF2	-0.929499	5.4927	6.09018	0.0177822	0.0379207
	NTHL1	-0.871558	1.90928	4.90491	0.0323008	0.0625289
	BLTP3A	0.656967	5.44119	20.7185	4.55198e-05	0.000241498
	GNAI3	0.329317	5.61204	2.09822	0.15495	0.230199
	IPO5	0.0614781	5.85301	0.122445	0.728159	0.790939
	OAT	0.414519	4.69221	1.89734	0.175726	0.255285
	WDR3	0.232621	4.40257	1.29738	0.261194	0.353246
	PKN2	0.255107	5.56556	1.52003	0.224521	0.312242
	WDR18	-0.0921339	2.76517	0.0511869	0.822116	0.865889
	TRAM2	1.01406	5.92747	18.4687	0.000101295	0.000476631
	NTN1	0.42048	3.59323	1.72657	0.196033	0.279129
	GLP2R	-2.00091	-0.140768	20.0551	5.74327e-05	0.000293446
	MCM10	-1.09192	1.17436	3.88278	0.0554479	0.098354
	DGKA	-0.0934489	4.48892	0.101533	0.751588	0.809667
	ERBB3	0.971903	6.68548	14.8633	0.000393089	0.00150633
	ANKRD44	-0.824658	5.31656	18.6053	9.63984e-05	0.00045709
	KARS1	0.453886	5.5785	4.35224	0.0431166	0.0795391
	ADAT1	0.666448	4.3574	14.6191	0.000432473	0.00163533
	PDIA5	1.07367	4.88485	14.4366	0.000464618	0.00173722
	TBC1D22B	0.387091	3.49321	5.40884	0.024974	0.0504451
	NDUFB4	1.31436	4.11338	18.519	9.94606e-05	0.000469525
	SPEN	0.37161	7.5047	4.01346	0.0516662	0.0927276
	MYLK	-0.321491	7.69989	1.19701	0.280201	0.374152
	ZC3H15	-0.395816	4.81489	2.27792	0.138769	0.209951
	MAP2K4	0.643123	4.51625	8.0863	0.00688011	0.016916
	PACC1	-0.0962444	1.80749	0.186038	0.668457	0.740684
	SLK	-0.61361	6.73458	5.62629	0.0223867	0.0459974
	CYB5R4	-0.38828	3.92876	4.68607	0.0361824	0.068678
	COL17A1	-2.06221	3.71789	2.25562	0.140666	0.212274
	GSTO2	-1.56006	2.87465	24.7634	1.16767e-05	7.64356e-05
	SEC61A2	1.81949	2.7843	39.0276	1.80154e-07	2.23597e-06
	PRKCQ	-1.47281	2.4511	21.7293	3.21125e-05	0.000179671
	TLE2	-1.80342	3.67262	24.9281	1.10691e-05	7.30316e-05
	ASB1	0.0736665	4.55951	0.0656502	0.799039	0.848039
	FAM107B	0.735916	6.39662	4.73853	0.0352078	0.0671803
	ME1	0.83615	3.26659	10.1899	0.00268539	0.00764533
	TBC1D1	0.0495083	5.30962	0.0863659	0.770307	0.825052
	CDK13	0.327772	6.23191	4.75692	0.0348729	0.0666878
	MTHFD2	-0.919966	4.50232	6.82182	0.0124637	0.0279373
	SLC9A7	0.27192	4.16002	1.48565	0.229744	0.318283
	FOXJ2	-0.174712	4.56873	1.43212	0.238179	0.327918
	YBX1	-0.487692	7.0206	5.07955	0.0295274	0.0580341
	PDE4A	-0.951889	3.68163	7.2058	0.0103797	0.0239099
	PPP2R5A	-0.0855526	5.33075	0.200039	0.657004	0.730977
	ELAVL1	0.139847	4.66842	1.13982	0.291833	0.386642
	TIE1	-1.48179	4.49138	25.5857	8.954e-06	6.11989e-05
	DIP2B	0.678189	6.0131	21.976	2.9518e-05	0.000167222
	SMARCD1	-0.138978	4.39451	0.80672	0.374249	0.470956
	KDM4A	-0.0331438	5.20666	0.0444176	0.834105	0.875158
	NFYC	0.485484	3.99401	8.46415	0.00578641	0.0146089
	ZMYND12	0.752056	-0.114048	3.10912	0.0851828	0.140623
	SLC9A3	-0.275037	1.09513	0.380397	0.540744	0.628003
	NGEF	5.59153	3.75516	97.9857	1.64458e-12	1.05369e-10
	ASPM	2.90848	4.70094	10.6723	0.00218019	0.00641145
	CD84	-0.963259	4.83518	6.38689	0.0153786	0.0334457
	ELOVL1	0.142035	4.24183	0.497296	0.484612	0.577102
	SPI1	-1.33624	4.78863	12.0023	0.0012432	0.00398734
	POLR1H	-0.194331	2.33828	1.02028	0.318278	0.413617
	MPPED2	-0.64619	-0.0783806	2.2122	0.144448	0.216926
	CLDN18	-4.42385	6.22811	50.2029	1.14113e-08	2.17034e-07
	ZBTB11	-0.0183108	5.10489	0.00732354	0.932212	0.950341
	ATXN3	-0.534883	4.49351	11.231	0.00171811	0.005239
	GOLGA5	1.10258	5.392	11.759	0.00137587	0.0043465
	FGFR2	-0.802406	5.37807	6.17003	0.017098	0.0366711
	LRRC40	1.02064	3.61331	7.80661	0.00783062	0.0188937
	ISOC1	1.83653	4.19473	42.058	8.21154e-08	1.15142e-06
	EML1	-1.3444	3.44662	38.2598	2.2091e-07	2.66861e-06
	TRMT11	1.34476	4.16467	25.6194	8.85799e-06	6.07501e-05
	THUMPD1	-0.0825343	4.95267	0.224567	0.638054	0.714652
	MSANTD3	0.973762	3.60256	12.5324	0.000998722	0.0033121
	KIF26A	-2.43103	2.10309	33.1188	9.14829e-07	8.9436e-06
	ATG2B	1.30592	6.43402	46.2885	2.87722e-08	4.80347e-07
	ARFGEF1	0.49403	6.47153	6.8558	0.0122624	0.027543
	ACSM2B	7.11095	6.98888	46.4984	2.73513e-08	4.60878e-07
	ZFAT	0.511395	3.87868	1.9028	0.17512	0.254584
	MTFR1	1.62708	4.2344	52.1575	7.30022e-09	1.50437e-07
	STAG3	0.0815128	0.26347	0.0878242	0.768433	0.823613
	FECH	0.825481	4.09949	18.8791	8.73249e-05	0.000417499
	MYO9A	-1.12211	6.09456	41.7707	8.83514e-08	1.21918e-06
	DDX3Y	2.21747	6.02521	3.86528	0.0559769	0.0991452
	PFKP	-0.697227	5.20212	2.6356	0.11203	0.175625
	IDI1	1.62712	5.98105	12.6903	0.00093614	0.00313345
	SP100	0.0355262	6.49483	0.0502006	0.823809	0.867158
	KLF6	-1.84609	7.78728	55.1579	3.74549e-09	8.60868e-08
	PLPP1	0.365343	4.18179	1.85763	0.180215	0.260501
	NEO1	-0.364275	4.81798	3.34858	0.0744185	0.125417
	TRAM1	0.237949	6.67369	0.494332	0.485909	0.578108
	PHKA1	0.968097	3.37475	11.5113	0.00152645	0.00473908
	TNFRSF1A	0.744288	6.62862	13.4975	0.000674905	0.00237469
	CACNB1	-0.638851	3.21718	1.88123	0.177531	0.257374
	EVI5	-0.436017	5.26888	7.31412	0.00986156	0.022919
	STOML1	-0.614299	2.7715	3.26295	0.078083	0.130489
	PKM	-1.25105	8.14776	17.8445	0.000127225	0.000578467
	DHX29	0.479609	4.73823	5.81075	0.020418	0.0425685
	DNTTIP2	-0.490036	5.01552	2.82966	0.100014	0.160152
	METTL22	0.617591	3.77626	11.5835	0.00148085	0.00462327
	TP53BP1	-0.628594	5.68038	13.7191	0.000617552	0.00221012
	TRO	2.31511	3.31989	51.6225	8.2418e-09	1.66059e-07
	RRP15	-0.357521	3.67952	2.31759	0.135467	0.205773
	RHOA	-0.540043	7.58363	9.36897	0.00385162	0.0103639
	DHX8	-0.00369458	5.34391	0.000802646	0.977533	0.983374
	PRKCZ	-1.62781	4.52485	23.1593	1.9806e-05	0.000119529
	ZFY	1.71739	3.19941	3.68145	0.0618843	0.10772
	IARS2	0.688413	5.6614	10.7036	0.00215115	0.00634047
	SYT1	-1.56276	1.6338	31.5659	1.43411e-06	1.30113e-05
	NAV3	0.592859	4.55299	1.89719	0.175743	0.255293
	IDH3G	0.788132	3.90843	11.9093	0.00129227	0.00411495
	ROGDI	-0.490098	2.9619	1.96157	0.168744	0.247042
	PDZD4	-1.8091	1.33346	38.9637	1.83224e-07	2.26631e-06
	ATP2B3	-1.21025	-0.800018	2.60716	0.113926	0.178096
	ROCK1	-0.473826	6.6069	6.02314	0.0183793	0.0390033
	CBFB	-0.0969554	4.42281	0.39628	0.532451	0.620867
	PDK3	0.522544	5.40008	7.25094	0.0101603	0.0234943
	HYAL2	-1.36737	5.71246	18.5012	0.000100106	0.000471751
	HDAC4	-0.581145	4.53638	4.68476	0.0362072	0.0687129
	RASSF1	-0.755103	4.0514	8.22294	0.00646114	0.0160524
	FGFR3	-0.0216097	4.01827	0.00332298	0.954307	0.966679
	IFI35	-1.21821	3.15082	14.8474	0.000395529	0.00151355
	HEATR6	0.266308	3.65658	1.48194	0.230316	0.318874
	COASY	1.37072	4.86489	27.6106	4.72578e-06	3.56775e-05
	PLEKHH3	-0.0593758	3.41079	0.0324881	0.857834	0.894739
	MEF2A	0.489084	6.2003	6.92856	0.0118429	0.0267416
	OTUD5	-0.192424	4.73024	1.86821	0.179006	0.259096
	TFE3	-0.0548188	5.21057	0.0488186	0.82621	0.868881
	TBC1D25	-0.231754	3.10874	1.02606	0.316929	0.412371
	ACSL4	-0.333279	6.63723	1.00928	0.32087	0.41655
	INPP5A	-0.327059	3.81375	4.0721	0.0500622	0.0902665
	GPKOW	-0.615315	3.27738	7.96934	0.00726173	0.0177179
	GRIPAP1	-0.341293	5.72873	3.70163	0.0612034	0.106757
	FTSJ1	0.246532	3.4652	1.27896	0.264556	0.357326
	PRR11	0.370942	2.32036	0.682611	0.413392	0.509093
	REEP1	-2.82335	1.77807	53.0889	5.92046e-09	1.26054e-07
	ATP11A	-1.01847	7.29587	18.3953	0.000104032	0.000487606
	POLR1A	0.331216	5.82175	2.80339	0.101551	0.162112
	LAPTM4A	-0.0146988	5.79648	0.00267937	0.958965	0.969951
	TTC7A	-1.16575	4.99955	28.5442	3.54355e-06	2.81e-05
	IP6K2	0.173978	4.64602	1.06982	0.306948	0.402082
	STON1-GTF2A1L	-1.34557	1.76263	4.25883	0.0453076	0.0829819
	SRBD1	0.208647	3.89571	0.980323	0.32783	0.423838
	KIF2A	-0.358176	4.69097	3.49314	0.0686587	0.117497
	RASGRP2	-1.26668	3.08107	13.5489	0.00066113	0.00233682
	PSME4	0.59304	6.49571	8.91288	0.00472263	0.0123199
	IFT80	-0.170521	3.88543	0.34888	0.557936	0.643807
	SIRT2	0.576743	4.67727	6.28054	0.0161974	0.0349778
	ERLEC1	0.0849326	5.26983	0.173213	0.679407	0.750481
	PPP2R5B	-0.0166373	3.2616	0.00315583	0.955469	0.967564
	PYGM	0.402483	1.17185	0.878235	0.354082	0.450379
	MAST4	0.168976	6.47999	0.507137	0.480347	0.572777
	ADGRF5	-1.50527	7.21538	29.6259	2.55134e-06	2.1167e-05
	SDK2	-0.488697	3.09955	1.08029	0.304623	0.399566
	NUP133	0.0103584	4.55733	0.00398955	0.949939	0.963648
	NUCKS1	-0.276378	7.23828	1.88694	0.176889	0.256648
	VPS35	-0.509444	5.40655	9.94031	0.0029941	0.00838146
	DNAJA2	0.291516	5.33131	1.4002	0.243394	0.333597
	BCL3	0.491168	4.85423	1.9104	0.174279	0.25359
	KCNAB2	-0.699212	5.18118	4.22776	0.0460633	0.0841105
	ABCC9	0.698311	5.93227	5.8031	0.0204958	0.0426897
	CLEC2D	-0.124735	3.54612	0.187566	0.667183	0.739574
	FUNDC1	-0.49541	1.15018	2.72386	0.106372	0.168358
	MAOB	1.48303	5.40473	19.9125	6.03967e-05	0.000305856
	RORA	1.70375	7.2624	20.7049	4.57361e-05	0.00024254
	TGFBR3	0.181171	6.00317	0.41191	0.524515	0.613873
	PLA2G10	-2.12076	-0.383473	11.0181	0.00188061	0.00565666
	HES2	-1.91577	0.707947	10.0496	0.00285444	0.00805384
	ATP1B3	-0.581628	4.8522	2.36374	0.131739	0.201145
	NEDD4	1.02566	5.09891	15.3724	0.000322637	0.00127435
	PIGB	0.700742	2.40806	10.1593	0.00272134	0.00773153
	MAPK6	1.38949	6.14952	11.8006	0.00135218	0.00428123
	GNB5	0.919491	4.02714	15.77	0.000276913	0.00111846
	RAB27A	0.0911386	5.75289	0.195605	0.660578	0.734163
	HDHD5	1.33588	4.15363	22.1552	2.77725e-05	0.000158742
	UFD1	1.74464	5.6878	44.713	4.22551e-08	6.56965e-07
	LRP6	0.910945	6.51551	18.1706	0.000112904	0.000521759
	PHRF1	-0.230753	5.79944	0.730153	0.397717	0.493962
	ELP1	0.760036	5.81959	17.36	0.000152135	0.000671074
	NUCB2	0.363785	4.94291	1.13458	0.292931	0.387696
	PFN2	0.00603093	2.89582	0.000393679	0.984265	0.988406
	PTPN3	2.55456	6.08739	92.63	3.74564e-12	2.1235e-10
	SPTB	0.198572	3.22061	0.230077	0.633973	0.711145
	DAPP1	-1.5019	2.40357	18.5823	9.72043e-05	0.000460576
	FGF10	-3.10015	1.42468	60.8903	1.10806e-09	3.01216e-08
	SLC44A1	0.873488	6.30214	18.0292	0.000118891	0.000545829
	TMEM260	1.04176	3.68622	14.591	0.000437262	0.00165085
	SMG6	-0.257747	5.2971	2.00958	0.163738	0.240883
	EXOC5	0.0521487	5.29586	0.0586052	0.809901	0.856159
	CLTCL1	1.93085	3.94437	37.5554	2.66854e-07	3.14321e-06
	FSTL3	-0.348349	5.7771	0.515765	0.476659	0.569372
	DGCR2	-0.383246	5.57233	2.06591	0.158087	0.234012
	RNF126	0.910274	3.76151	5.27999	0.0266583	0.0532577
	MNT	-0.560838	4.29217	3.51694	0.067759	0.116204
	ZXDC	1.09654	5.53122	30.8461	1.77247e-06	1.55109e-05
	JMJD6	-0.135932	4.56078	0.323461	0.572586	0.657091
	POLB	0.617914	2.80386	8.99721	0.00454703	0.0119172
	ST6GALNAC1	-0.850067	2.14278	2.58312	0.115556	0.18023
	WIPI1	1.39357	4.81427	29.0803	3.00909e-06	2.44235e-05
	GBA2	0.672668	5.62229	14.5144	0.000450606	0.00169357
	NDST1	-0.0973082	7.03036	0.150386	0.70014	0.767916
	ASNS	0.198877	2.90655	0.233949	0.631142	0.709141
	AP3M2	-0.1043	3.47643	0.431043	0.515085	0.605425
	ST6GALNAC2	-1.81207	1.99858	23.6052	1.70763e-05	0.000105499
	PABPC1	-0.158956	8.25846	0.661141	0.420776	0.516439
	TESK2	0.483322	2.37682	6.01227	0.0184781	0.0391824
	CFAP20	-0.378078	2.85301	4.19472	0.0468817	0.0853824
	CSNK2A2	0.254671	5.31519	2.51547	0.12029	0.186408
	PTPN21	-1.61097	4.91668	70.5361	1.65719e-10	5.66838e-09
	EIF2B3	0.618152	3.24363	11.841	0.00132956	0.00421889
	CAMK2A	-0.966034	0.648554	4.05313	0.0505751	0.0910856
	TCOF1	-1.24387	5.08946	27.9615	4.23902e-06	3.25226e-05
	CDC42	-0.709895	6.56151	26.443	6.81433e-06	4.86866e-05
	OSBPL3	-0.875022	4.14982	8.49067	0.00571695	0.0144588
	RAD18	0.596887	3.26077	5.0988	0.0292379	0.0575797
	ATP2B1	-0.421559	5.89466	3.45165	0.0702596	0.11968
	NCK2	-1.33313	3.7415	39.3157	1.66967e-07	2.0999e-06
	MAP4K4	0.226675	6.842	1.55295	0.219657	0.306636
	MGAT4A	-0.885556	5.32902	36.1881	3.87027e-07	4.33087e-06
	RPL31	-0.816341	6.30908	8.23824	0.00641596	0.0159573
	WDR1	-0.577302	7.2784	8.1867	0.00656955	0.0162703
	SNX13	0.260145	5.76988	1.64494	0.206733	0.291764
	ARHGAP10	-1.24207	4.34731	42.0251	8.28063e-08	1.15514e-06
	RPS6KA2	-0.902819	6.32788	10.8073	0.00205769	0.00611146
	ING3	-0.0613082	2.69024	0.0517879	0.821093	0.865063
	VASH1	-1.95799	4.29233	47.7704	2.01739e-08	3.56821e-07
	LMCD1	-1.50377	5.40286	15.1483	0.000351845	0.00136955
	BUD23	-0.0662316	3.61519	0.0919681	0.763198	0.819288
	SEL1L	1.18874	7.30367	28.3455	3.7661e-06	2.95413e-05
	TRIP13	0.283971	0.88974	0.249707	0.619909	0.699014
	ATP6AP1	0.37009	5.30531	2.3191	0.135343	0.205657
	TCF3	-0.881792	3.85211	10.3769	0.00247616	0.00713671
	TRIB2	0.195398	4.67965	0.982603	0.327275	0.423271
	DAZAP1	0.255023	5.66305	1.85026	0.181063	0.261551
	MBD3	-0.754586	4.55104	3.06308	0.0874461	0.143541
	HLTF	0.350472	4.05569	1.43349	0.237958	0.327656
	FAM50A	-0.525962	4.5102	7.18929	0.0104612	0.024067
	FAM3A	0.375024	4.10279	2.37322	0.130988	0.200201
	CPSF1	-0.424081	4.94929	1.56789	0.217493	0.304279
	MYO3B	-1.18312	-0.650654	4.65943	0.0366886	0.069499
	CYBRD1	-2.10268	6.20261	45.5088	3.47689e-08	5.61473e-07
	CDH19	0.848438	2.27772	3.61706	0.0641138	0.111093
	PDCD2	0.329398	4.04413	4.98519	0.0309923	0.0604158
	SLC6A15	-2.3066	0.197485	6.49661	0.0145802	0.0319783
	RDH11	1.97776	5.91037	61.7314	9.32205e-10	2.58259e-08
	PRKACA	0.970694	5.17601	21.6301	3.32218e-05	0.000184594
	ADGRL1	-1.6168	3.83764	18.4359	0.000102505	0.000481386
	SPP2	7.84083	1.86834	189.96	4.01599e-17	2.56551e-14
	ACTN1	-0.0296882	7.35755	0.00752907	0.93127	0.949794
	ZFYVE26	-0.0308382	5.91305	0.0397124	0.843013	0.882208
	RPS6KA6	-0.515037	1.12057	1.60612	0.212071	0.298058
	EPN2	-0.548732	4.58333	11.5863	0.0014791	0.00461965
	PTPN18	0.128384	5.17957	0.465022	0.499057	0.59071
	LIMS2	-1.13147	4.39967	12.1225	0.00118271	0.00381702
	SPEG	-0.484222	2.39544	1.42403	0.239487	0.329427
	LNX1	1.39615	2.54384	20.215	5.42879e-05	0.000280013
	ALDH3A2	0.431163	6.51188	5.38161	0.0253201	0.0509971
	TFRC	-0.742178	7.59829	6.24455	0.016485	0.0355347
	SREBF1	1.79169	6.80534	17.1469	0.000164671	0.000717914
	TRPC5	0.97383	2.16765	5.56579	0.0230761	0.0471819
	AFF4	0.447574	7.60111	4.87721	0.0327662	0.063255
	UBE2D1	0.0710953	3.13684	0.0457158	0.831735	0.87331
	PALS1	0.128706	5.26404	0.377181	0.542453	0.629586
	RHOBTB1	-1.20939	3.73063	22.7394	2.27974e-05	0.000134408
	SMC1A	-0.474643	6.30847	6.16708	0.0171227	0.0367133
	HSD17B10	1.05746	4.58504	19.593	6.76377e-05	0.000335715
	MARK2	-0.275842	5.27239	1.67578	0.20261	0.286951
	HMMR	0.873011	1.80262	1.30399	0.260001	0.351896
	CHFR	-0.24432	4.89629	1.4794	0.230709	0.319233
	TRHDE	-2.58046	1.7906	28.2579	3.86895e-06	3.01736e-05
	P4HA2	-0.244685	5.07886	0.386452	0.537555	0.625096
	FCGR2B	-0.542277	3.88106	2.10701	0.154108	0.229043
	NFATC3	0.18781	5.86322	1.31701	0.257672	0.349506
	TRNT1	0.473155	4.70618	8.23874	0.00641449	0.0159554
	ACADVL	1.57936	8.36925	45.7941	3.24355e-08	5.31296e-07
	STK10	-0.598724	5.76726	4.7334	0.0353019	0.0673244
	FBXW11	0.0771712	5.22264	0.385498	0.538055	0.625492
	ACAP1	-0.439186	4.07462	2.37666	0.130717	0.199885
	CRMP1	-0.778197	2.60086	7.76962	0.00796645	0.019164
	EVC	-1.07071	4.81517	9.64345	0.00341104	0.00935925
	DERL2	1.04803	4.04196	18.9722	8.44448e-05	0.000405514
	SIDT1	-0.168994	2.37533	0.305847	0.583193	0.666002
	NDE1	-0.427507	3.92523	4.28607	0.0446564	0.0819757
	IRAG1	-0.858173	3.86481	5.52198	0.0235898	0.0480693
	TMEM38A	1.34716	1.8596	19.5562	6.85283e-05	0.00033936
	AP1M1	0.541962	4.80055	5.09585	0.029282	0.0576561
	PVR	1.03714	6.72273	17.9461	0.000122569	0.000560697
	XRCC1	-0.633009	3.41192	9.52593	0.00359276	0.009769
	SCARB1	3.56382	7.37766	85.4088	1.19977e-11	5.70219e-10
	MCM2	-2.34486	3.27782	18.5083	9.98486e-05	0.00047105
	MOV10L1	-0.712178	-0.528227	1.88246	0.177392	0.257224
	PANX2	1.13861	1.70428	5.81456	0.0203793	0.0424919
	SELENOO	1.55479	4.47825	14.5219	0.000449279	0.00168976
	TP63	-0.742439	1.60797	0.931204	0.340114	0.436284
	ALPK1	1.10992	5.74233	33.7518	7.63819e-07	7.71635e-06
	LLGL2	-0.817339	5.1325	4.58621	0.0381197	0.0717906
	PDE8A	1.02476	5.50757	36.3783	3.67374e-07	4.13868e-06
	CLCN4	0.0293671	3.16112	0.0141097	0.906017	0.931976
	NLE1	-0.0392341	2.55445	0.0280238	0.867862	0.902776
	SDHA	1.64501	6.85245	44.1139	4.89985e-08	7.43126e-07
	SMARCE1	-0.113383	5.60695	0.323413	0.572614	0.657091
	GSDMB	1.95021	5.16758	31.0031	1.69212e-06	1.49463e-05
	KDM5A	-0.0420342	6.60286	0.0755897	0.784723	0.836484
	PPP2R3A	-0.343014	3.98526	1.80212	0.18672	0.268332
	FERMT2	0.373704	6.36495	1.87068	0.178724	0.258788
	ABCB11	8.85436	7.31065	100.942	1.05831e-12	7.67816e-11
	DHRS9	-0.469621	1.52487	1.42165	0.239874	0.329834
	CD5L	1.62107	2.61275	3.44276	0.0706078	0.120133
	PTGS2	-1.8979	5.96015	10.9139	0.001966	0.00587771
	IGF2BP2	-0.885989	3.76159	11.525	0.0015177	0.00471458
	MAP3K13	0.854284	5.36116	17.9341	0.000123107	0.000562451
	ST6GAL1	3.74174	8.59985	97.1823	1.85688e-12	1.17584e-10
	TBX21	-1.44459	0.867951	13.9711	0.000558535	0.00203036
	FRY	0.95547	6.40307	10.3223	0.00253537	0.00727839
	PICALM	0.181702	6.94789	0.594185	0.445152	0.539457
	NSF	0.637275	5.08788	9.31661	0.00394231	0.0105582
	GLI2	-0.641117	1.92075	2.906	0.095692	0.154657
	CLASP1	0.76045	6.20483	24.7336	1.17906e-05	7.702e-05
	MRPS34	-0.265899	3.38899	0.830618	0.367333	0.464162
	NOTCH3	-1.12807	5.73319	5.25493	0.0269999	0.0538411
	CLNS1A	0.838127	4.86253	18.6045	9.64266e-05	0.00045709
	TEAD2	-0.916482	3.83757	9.79753	0.00318745	0.00882828
	EED	0.279278	3.33248	1.25626	0.268774	0.361829
	CDHR2	8.72757	4.97044	125.537	3.73521e-14	4.88728e-12
	TSG101	0.470659	4.15046	4.68674	0.0361698	0.06866
	NCBP3	0.0475827	5.56204	0.17967	0.673836	0.745366
	ATP2A3	-1.24304	4.2734	9.28891	0.0039912	0.0106628
	CA12	0.192666	4.36639	0.134477	0.715689	0.781003
	MGLL	0.266771	6.89314	1.26967	0.266272	0.359129
	NTN4	-1.04532	5.16067	14.8551	0.000394344	0.00150981
	BCS1L	0.927828	3.21111	14.8578	0.000393927	0.00150848
	NUAK1	-0.339342	4.34143	1.4548	0.234559	0.323633
	DPP8	0.153146	5.02781	0.886784	0.351775	0.448126
	SLC24A1	-0.427683	3.87268	6.7558	0.0128652	0.0286891
	ZNF532	-0.630522	5.44596	13.2472	0.000746494	0.00258924
	SCARF1	-0.428906	4.40695	1.06161	0.308787	0.404066
	LMAN1	1.36066	7.25369	25.5958	8.92522e-06	6.10954e-05
	HACD3	0.6805	5.2934	8.74566	0.00509248	0.0131224
	IPCEF1	-0.707361	2.54768	4.65148	0.036841	0.0697391
	ZZEF1	0.36897	6.78927	5.61044	0.0225651	0.0462896
	ENO1	1.33385	9.09405	9.58391	0.00350186	0.00956495
	SLC12A1	-2.383	-0.361793	13.9837	0.000555754	0.0020216
	MYDGF	-0.0653172	4.49941	0.0545788	0.816422	0.861354
	ANO8	-0.546932	2.73363	2.25154	0.141017	0.212686
	TUBE1	2.39165	4.40455	43.3346	5.94996e-08	8.77943e-07
	ARHGEF10L	2.1474	6.06915	36.7736	3.29793e-07	3.76214e-06
	TXK	0.475329	1.48869	2.09991	0.154787	0.229989
	WSCD2	-2.852	-0.83183	28.2288	3.90364e-06	3.04115e-05
	TACR2	-2.10604	-0.130173	34.9755	5.41322e-07	5.72699e-06
	ACTR6	-0.316833	2.32875	1.11025	0.298095	0.392997
	TIPIN	-0.299196	1.09445	1.71401	0.197636	0.280987
	SRI	-0.821374	3.83375	17.3255	0.000154092	0.000678053
	EIF4G3	1.01746	6.36321	42.7066	6.96729e-08	1.00086e-06
	NUP37	-0.0207526	2.004	0.00724444	0.932578	0.950565
	SEMA3A	-0.893209	2.21355	5.0996	0.0292259	0.0575665
	GTSE1	0.384036	1.29666	0.460384	0.501193	0.592495
	SEMA3C	-1.90662	4.29668	21.1495	3.9198e-05	0.000211944
	TTC38	2.82022	5.61032	87.8229	8.07065e-12	4.03904e-10
	ACAT1	2.9129	6.72074	63.7518	6.19093e-10	1.84962e-08
	GRAMD4	1.57206	6.44855	13.5891	0.000650559	0.00230395
	CELSR1	-2.17673	5.82631	20.6497	4.66252e-05	0.000246279
	ZNF638	0.714286	7.25201	11.0542	0.00185195	0.0055844
	SLC25A40	0.555963	2.92805	3.9017	0.054882	0.0975321
	TIMM21	0.941263	3.05151	15.036	0.000367519	0.00142038
	ADD2	-2.1767	1.21824	62.165	8.53223e-10	2.40675e-08
	RASAL2	-0.981416	5.59371	29.7197	2.48033e-06	2.06647e-05
	VPS9D1	0.754661	3.40409	4.71469	0.0356472	0.0678102
	ZNF37A	0.310966	5.25296	1.6323	0.208453	0.293752
	MARK3	0.394856	6.96466	5.2158	0.0275427	0.0547427
	SLC25A3	0.73753	7.06284	10.8501	0.00202038	0.00601546
	FNDC3B	1.43558	7.80725	54.4951	4.33242e-09	9.69106e-08
	FOSL2	-1.11454	7.82431	14.7147	0.000416574	0.00158071
	CACNG4	-4.52058	1.60416	72.5478	1.13873e-10	4.06129e-09
	FRYL	0.108961	6.42828	0.508504	0.47976	0.572181
	TMEM131	0.866976	5.99424	39.1767	1.732e-07	2.16575e-06
	FSCN1	-1.36026	3.60273	11.192	0.00174676	0.00531367
	ACTB	-0.578223	10.4913	3.91057	0.0546189	0.0971201
	MOCOS	4.21931	5.27151	112.012	2.19743e-13	2.0842e-11
	PLD1	1.29883	4.57259	44.0686	4.95513e-08	7.50003e-07
	ATP12A	-0.744722	0.452051	0.619466	0.435697	0.530792
	WDR62	-0.0970024	1.99975	0.059761	0.808073	0.854853
	DLG1	0.520832	5.77096	9.73748	0.00327268	0.00903325
	RAB7A	-0.0982052	6.37779	0.289412	0.593457	0.675626
	BCAP29	-0.0873859	4.07614	0.0651815	0.799741	0.848619
	SEC31B	0.862769	4.03858	12.333	0.00108412	0.00355268
	SART3	-0.0856103	5.31814	0.306544	0.582766	0.665598
	ARHGAP15	-1.18261	3.00695	17.443	0.000147525	0.00065435
	EXOSC7	-0.0482563	3.57208	0.0623503	0.804045	0.851563
	KIFAP3	-0.217989	3.74571	1.19591	0.280419	0.374329
	MKRN2	0.475797	4.61109	13.3112	0.00072747	0.00253175
	MCM6	-0.57716	3.38536	4.11731	0.0488628	0.0884343
	REXO2	0.0131482	3.89553	0.00505791	0.943643	0.958964
	RBM7	0.0621725	4.10165	0.0673651	0.79649	0.845921
	RBMS2	-1.45222	6.18008	35.4546	4.73804e-07	5.12502e-06
	BAZ2A	0.107144	7.00665	0.318171	0.575731	0.659713
	PTPN23	-0.0714154	5.00046	0.0504536	0.823373	0.866919
	MLH1	0.112484	4.64665	0.43043	0.515382	0.605636
	UNG	0.336495	3.26459	2.3314	0.134338	0.204444
	FMO4	2.156	2.45833	29.9387	2.32244e-06	1.95593e-05
	KLHL20	0.217989	4.06717	1.52074	0.224415	0.312134
	RGS11	-1.52537	1.4904	19.5901	6.77071e-05	0.000335983
	SLC46A1	1.45119	5.06105	12.5781	0.000980171	0.00325973
	PLXNA2	-1.7943	6.20886	47.8371	1.98571e-08	3.52079e-07
	SPAG5	2.65859	4.73651	35.0957	5.23485e-07	5.56539e-06
	ANKRD13A	0.164098	5.74902	1.42541	0.239264	0.329141
	TPD52	0.191226	4.60895	0.293995	0.590558	0.672941
	ACACB	2.96166	7.69103	51.7406	8.02344e-09	1.62392e-07
	TRAF4	0.218644	4.59432	0.396276	0.532453	0.620867
	PAG1	0.679574	6.56345	8.15815	0.0066563	0.0164514
	GPATCH1	0.351709	2.71954	4.24018	0.0457594	0.083626
	ICAM3	0.198285	3.95373	0.274793	0.602911	0.683752
	NT5C2	0.670235	5.90006	17.4824	0.000145394	0.000646698
	MCAM	-1.07514	5.91738	9.23506	0.00408812	0.0108789
	GPC4	-1.63758	4.36105	18.0634	0.000117415	0.000539738
	MBNL3	1.36463	6.08371	10.8292	0.0020385	0.00606356
	CAMSAP3	0.523786	3.96092	1.88192	0.177453	0.257295
	RAP1GAP	0.715225	4.91905	3.14494	0.0834669	0.138115
	XAB2	-0.0924368	4.5511	0.104071	0.748611	0.8075
	ARHGEF1	-1.21745	5.80786	14.406	0.000470237	0.00175551
	STXBP2	-0.778791	4.96807	6.1796	0.0170179	0.036539
	MAP2K7	-0.564969	3.75336	4.36399	0.0428492	0.07916
	DGKD	-0.341579	5.71984	1.14565	0.290619	0.385339
	CTTNBP2	-0.979773	2.17604	13.7102	0.000619773	0.00221661
	RARB	-0.291443	2.83132	2.55424	0.11755	0.182854
	TOP2B	0.0190774	6.82905	0.00643544	0.936445	0.953344
	TM9SF3	0.372438	6.6646	2.3692	0.131306	0.200577
	NFKB2	0.0575398	5.88582	0.0227054	0.880952	0.912808
	UBE2T	1.38572	0.423729	5.68762	0.0217103	0.0447813
	PPP1R12B	0.161827	6.6411	0.688416	0.411429	0.507337
	DNAJC10	0.346343	5.92195	2.82	0.100576	0.160898
	GTF3C1	-0.262272	6.15778	2.14852	0.150208	0.224167
	IL4R	0.54899	7.06191	5.62039	0.0224529	0.0461073
	USP33	0.0947156	5.2945	0.378335	0.541839	0.62894
	PAK3	-1.18617	0.957975	11.8683	0.00131454	0.00417851
	CAPN6	-4.57274	2.57675	13.2852	0.000735131	0.0025535
	SNRPA	0.641378	3.8954	10.8453	0.00202449	0.00602521
	SPAG6	-3.66383	0.704396	25.6743	8.70341e-06	5.986e-05
	EXOSC5	-0.197445	2.02235	0.395541	0.532832	0.621174
	DYNC1I2	-0.588553	5.16547	10.8516	0.00201907	0.00601238
	APBB1IP	1.33075	4.71779	22.1697	2.76361e-05	0.000158087
	LRCH4	-0.248302	4.70692	0.708838	0.404633	0.500548
	FAM76B	1.11699	4.10414	17.6466	0.000136834	0.000613536
	SIRT6	-0.487037	2.23116	1.54078	0.22144	0.30883
	POLD3	0.346944	3.85078	2.3413	0.133537	0.203524
	ACTN2	3.23087	5.60399	12.7448	0.000915525	0.00307535
	CAPZB	-0.0653384	6.6812	0.155103	0.695713	0.764218
	GPR137B	0.707723	3.2119	9.68007	0.00335644	0.00923627
	NAALAD2	0.181065	1.89727	0.0580254	0.810825	0.856864
	JADE1	-0.481435	5.17051	7.34999	0.00969616	0.022599
	SLC25A43	0.399836	3.11076	5.22523	0.027411	0.0545257
	UBE2A	-0.101434	4.07989	0.421824	0.51959	0.609368
	FGFR1	-0.965512	5.88582	11.0165	0.00188193	0.00565986
	FBLN1	-2.33369	6.31784	20.9322	4.22603e-05	0.000225971
	ITGA8	-2.66873	4.61343	51.9304	7.6853e-09	1.56884e-07
	CST7	-0.323727	2.39435	0.660131	0.421129	0.516629
	MAP2	-1.54077	4.30242	32.7929	1.00452e-06	9.65837e-06
	PIAS2	1.59612	5.42735	39.1133	1.7612e-07	2.19721e-06
	AMPH	1.12202	1.364	5.91255	0.019412	0.0408198
	ARAF	0.455694	4.69587	2.88482	0.0968697	0.1562
	MCCC1	0.555614	4.8556	7.78319	0.00791636	0.0190667
	LAMP3	-1.81307	6.09718	7.17932	0.0105107	0.0241707
	FAP	-0.338843	2.73551	0.437583	0.511931	0.60263
	NEBL	-0.198192	6.33577	0.117823	0.733132	0.79483
	ACER3	-0.434114	5.26131	6.3823	0.0154129	0.0335104
	UBE2K	0.502243	5.01935	4.55371	0.0387744	0.0728026
	PIK3C3	0.350605	5.17142	3.33395	0.0750308	0.126266
	N4BP2	0.484173	5.05536	3.79373	0.058199	0.102405
	TIGAR	-0.136462	3.27519	0.324484	0.571982	0.656595
	TULP3	0.990987	4.02336	12.1418	0.00117326	0.0037927
	SYNJ2	0.44764	4.35097	3.16678	0.0824403	0.136677
	ADCY2	-1.21551	0.526731	5.23981	0.0272083	0.054182
	PPP2R5C	0.449431	6.20028	5.42635	0.0247542	0.0500616
	RBFOX1	0.521161	0.621452	0.458269	0.502173	0.593363
	GNB1	-0.16894	6.91752	1.11735	0.296575	0.39142
	EDN1	-2.51049	4.23999	43.2485	6.07974e-08	8.94661e-07
	MLLT10	0.630169	5.22977	13.5202	0.000668777	0.00235847
	ZCWPW1	0.108044	1.79152	0.197362	0.659156	0.732883
	ADCYAP1R1	-1.65499	0.510628	14.5828	0.000438675	0.00165446
	P2RY10	-1.34526	1.03941	6.54679	0.0142299	0.0313399
	ITM2A	-3.0256	2.52507	120.753	6.87253e-14	7.77455e-12
	NRDC	0.756572	6.42621	26.3947	6.91944e-06	4.9344e-05
	VDAC3	0.954176	4.82219	9.31583	0.00394368	0.0105594
	PCM1	0.195451	7.36773	0.619073	0.435842	0.530811
	TNRC6C	0.117414	4.8597	0.471294	0.496193	0.588066
	CBFA2T2	-0.281428	4.56832	1.74496	0.193716	0.276549
	BRINP1	-1.06706	-0.423824	3.43804	0.0707938	0.12039
	ITCH	1.17612	6.22847	33.7889	7.55809e-07	7.66037e-06
	PKD2L2	-0.314721	-0.378342	0.866147	0.357382	0.454017
	TP53INP2	1.23966	5.10307	24.3329	1.34373e-05	8.63119e-05
	SDF4	-0.278606	5.8862	0.944226	0.336797	0.432982
	MYH7B	-1.01099	1.20651	5.85784	0.0199458	0.0417243
	TP73	-1.08687	0.840525	3.72636	0.0603803	0.105579
	TOLLIP	0.635464	5.03474	4.90083	0.032369	0.0626384
	UBE2D4	0.47818	3.58428	8.2311	0.00643701	0.0159968
	RUNX1T1	-1.11129	3.21017	15.1839	0.000347031	0.00135421
	THOC1	0.725597	4.51611	11.6647	0.00143125	0.00448712
	FKBP7	-0.470583	2.07732	3.36017	0.0739374	0.12478
	OSBPL6	0.0889387	2.95932	0.0820403	0.77597	0.82931
	SLC1A3	-0.302277	5.67971	0.898085	0.348756	0.445024
	XRCC5	0.149747	6.88387	0.536794	0.467863	0.560762
	LXN	-1.20674	2.34953	15.3668	0.00032333	0.00127639
	SP140	-0.999155	2.5589	8.77431	0.005027	0.0129814
	MKNK1	0.375705	5.10382	3.7926	0.0582346	0.102451
	TNS1	-0.258615	9.19278	0.738988	0.394901	0.49128
	REXO1	-0.415446	4.31768	1.25868	0.26832	0.361309
	SAR1A	-0.335004	6.0047	5.01793	0.0304753	0.0596005
	CDC14A	-0.616255	2.95631	8.73739	0.00511155	0.0131606
	RAPGEF3	-1.70273	4.08957	39.0844	1.77472e-07	2.21153e-06
	CEACAM1	3.86423	5.07178	121.369	6.34666e-14	7.21725e-12
	SENP1	0.257288	3.81768	1.70874	0.198313	0.281803
	CIC	0.00646596	6.08588	0.000312824	0.985973	0.989649
	LIPE	-1.01362	1.12043	8.19362	0.0065487	0.0162299
	FDFT1	1.2984	6.28698	24.2012	1.40297e-05	8.93114e-05
	PAFAH1B3	-1.23586	1.05362	10.7704	0.00209038	0.00619415
	OPHN1	-1.39077	4.66743	25.1438	1.03228e-05	6.88822e-05
	AFM	12.7188	5.88895	153.727	1.42e-15	3.67173e-13
	KIF22	-0.584451	3.8848	6.22474	0.0166455	0.0358458
	CARMIL1	-1.32339	4.50297	45.0842	3.85725e-08	6.11082e-07
	PGM1	1.26902	6.11651	28.5306	3.55833e-06	2.81966e-05
	DDX1	0.149218	5.22244	0.456818	0.502847	0.593933
	DNM2	-0.138606	7.34453	0.356256	0.55382	0.640384
	EPB41L2	-1.129	6.18373	33.1035	9.18846e-07	8.9721e-06
	RIMS1	-2.64027	0.644036	39.3127	1.67098e-07	2.10033e-06
	MOXD1	-0.941116	3.43738	5.12718	0.0288166	0.0569152
	STX7	-0.533698	5.41547	8.16755	0.00662761	0.016386
	RABL2B	-0.495901	3.54272	6.93013	0.011834	0.0267272
	KEAP1	0.355037	4.65661	2.18003	0.147325	0.220486
	DDX43	-1.74751	-0.0423087	14.6099	0.000434033	0.00164008
	PTPRH	6.38486	4.38756	123.234	4.99807e-14	6.06469e-12
	DCT	-1.07594	-0.48376	3.09399	0.085919	0.141505
	SLC35C2	-0.00383799	4.43285	0.00019884	0.988817	0.991641
	CRYBG3	0.00464881	6.27305	0.000475409	0.982708	0.987313
	EPHA6	-1.89568	-0.0405206	10.02	0.00289158	0.00814064
	SCTR	-1.12866	2.1818	8.00329	0.00714867	0.0174754
	RFX3	-1.33997	3.58384	43.2983	6.0044e-08	8.85374e-07
	RIF1	-0.0323848	6.45645	0.0256512	0.873529	0.907032
	RAB21	0.095687	6.00844	0.210232	0.648967	0.724186
	SLC4A4	0.671244	5.19264	4.99909	0.0307717	0.0600755
	SMARCA2	-0.341275	7.08313	2.29142	0.137635	0.208496
	SESN1	-0.529731	4.40542	7.59841	0.00862874	0.0205523
	MID2	0.599115	4.07866	8.56897	0.00551697	0.0140512
	COL5A3	-0.514468	4.43822	1.93354	0.17175	0.250547
	SRCAP	0.0988764	6.0345	0.141006	0.709186	0.775215
	PUM3	0.103245	4.58655	0.17656	0.676504	0.747884
	CPB2	5.64109	7.75108	80.4479	2.77733e-11	1.1759e-09
	KCNN2	0.74567	0.644694	2.61461	0.113426	0.177477
	CNOT4	0.457433	4.58734	6.08773	0.0178036	0.0379522
	PSEN1	0.111076	6.39658	0.551595	0.461831	0.555056
	CPOX	0.589122	3.49039	6.00096	0.0185816	0.0393595
	CLDND1	-0.0422799	4.65392	0.0224691	0.881569	0.913229
	MOK	-0.915264	2.76564	10.7864	0.00207616	0.00615874
	HSP90AA1	-0.804249	8.87788	2.49192	0.12199	0.188558
	RBL1	-0.717665	2.72075	10.0061	0.00290928	0.00817988
	DLGAP4	0.520336	5.43241	4.12946	0.0485459	0.0879528
	IGSF9B	-1.83642	2.92755	31.4213	1.49621e-06	1.35013e-05
	CFHR2	8.69861	5.16874	107.176	4.30389e-13	3.6659e-11
	NDC80	1.84383	1.54284	5.45546	0.0243933	0.0494398
	AP4E1	0.720159	3.96888	17.0926	0.000168037	0.000729563
	RSBN1	-0.335726	4.36917	3.3193	0.0756494	0.127077
	MAGI3	-0.998454	5.68564	28.3882	3.71703e-06	2.92197e-05
	CXCL2	-1.05191	6.34272	5.44081	0.0245742	0.0497671
	COL4A4	-2.35602	4.94371	54.536	4.29351e-09	9.63379e-08
	TCF7	-0.458884	4.01439	5.19915	0.0277775	0.0551587
	OSTM1	-0.43132	4.43503	5.30411	0.0263339	0.0527167
	IMPG2	-0.340454	-0.023456	0.760891	0.388045	0.484525
	PCNP	-0.357342	5.23377	2.00011	0.164712	0.242119
	EXD2	-0.360134	3.66408	7.21734	0.0103231	0.0238042
	ARG2	1.77831	2.71307	11.1751	0.00175927	0.00534576
	MEF2C	-1.10991	4.58232	30.2294	2.12895e-06	1.80699e-05
	PTPRC	-0.91236	6.80783	8.98419	0.0045737	0.011976
	CACNA1S	0.281657	-0.395268	0.126926	0.723437	0.787583
	PKP1	-0.0155352	2.47806	0.000497148	0.982318	0.986998
	UBA5	0.994512	5.01142	23.7943	1.60407e-05	0.000100231
	STK17B	-2.02333	5.34743	60.6594	1.16218e-09	3.13183e-08
	CDC14B	1.178	4.55878	28.8355	3.24179e-06	2.60881e-05
	ZNF510	0.238648	3.73203	1.1842	0.282753	0.377035
	LRP2	-0.492919	5.90022	1.04288	0.313042	0.408291
	ZNF506	-0.1344	4.51126	0.635476	0.42987	0.525217
	JMJD4	0.0284957	3.12086	0.00919318	0.924074	0.945002
	DUSP12	-0.0619413	2.27632	0.12694	0.723423	0.787583
	AACS	-0.176173	4.17638	0.579199	0.45091	0.544524
	DELE1	0.761116	5.32224	34.5321	6.12837e-07	6.38103e-06
	CADPS2	-0.371793	4.8929	5.07809	0.0295495	0.0580671
	PCDHB4	-1.49953	0.661652	32.6575	1.04445e-06	9.99362e-06
	PCDHA6	-2.21666	-0.336058	20.0961	5.66081e-05	0.000289778
	PCDHGA2	-1.32474	1.77738	21.5282	3.44037e-05	0.000190024
	IFT25	0.387012	2.39233	2.54682	0.118069	0.183516
	PHLPP1	0.560893	4.32048	6.52553	0.0143772	0.0316001
	ATP8B1	0.21526	4.95744	2.86019	0.0982596	0.15796
	IL12RB2	0.316145	2.33931	1.29513	0.261603	0.353755
	SMARCD3	-0.183501	3.60558	0.505341	0.481121	0.573574
	WDR70	0.107618	4.30607	0.447034	0.507432	0.598334
	FYB1	-0.236153	5.35684	0.538301	0.467243	0.560166
	STRADB	2.03713	4.19975	60.1424	1.29369e-09	3.43087e-08
	BZW1	0.590174	6.82855	4.47862	0.0403344	0.0752179
	PGR	-1.40551	2.55597	17.2313	0.000159579	0.000698412
	C1QTNF3	0.459105	2.33208	2.22303	0.143493	0.215732
	ME2	0.154851	4.76717	0.683285	0.413163	0.508927
	C5orf22	0.92895	3.77673	11.2752	0.00168627	0.00515494
	CCNT2	1.08254	5.63357	15.3569	0.000324565	0.0012808
	FAM135A	0.157133	4.84866	0.336697	0.564865	0.65004
	COL19A1	0.0386288	0.0366075	0.00762573	0.930831	0.949542
	EPB41L3	-1.22815	5.29732	28.3783	3.7284e-06	2.92934e-05
	COBLL1	0.6552	6.46644	7.20436	0.0103867	0.0239207
	DLG3	-0.977726	3.70544	7.68176	0.00829928	0.0198809
	SERTAD4	-2.81733	0.842385	28.0741	4.09422e-06	3.1579e-05
	TRAF5	-0.431613	3.72455	5.20566	0.0276854	0.0549961
	MRPL22	0.289905	2.47895	1.14456	0.290845	0.385545
	GEMIN5	-0.329631	4.0113	5.35593	0.0256514	0.0515543
	NFE2L1	0.104623	7.48288	0.229262	0.634573	0.711643
	GSK3B	-0.149443	6.03641	1.15568	0.288544	0.383056
	ITGB5	0.171946	6.10918	0.528859	0.471151	0.563702
	ERC1	-0.142316	6.36658	0.688208	0.411499	0.507395
	XPO1	1.10281	6.93483	11.6844	0.00141949	0.0044586
	RNF13	-0.283425	5.28008	1.03472	0.31492	0.410371
	TRPM3	0.154541	1.76447	0.217234	0.643582	0.719489
	PALB2	0.784146	3.40537	15.638	0.000291283	0.00116966
	DOP1A	0.517737	5.12724	7.27406	0.0100499	0.0232712
	LYRM2	-0.409835	4.03532	7.30505	0.00990388	0.0229946
	BCKDHB	1.79499	3.95381	45.5617	3.43228e-08	5.55922e-07
	KAT6A	-0.0948859	7.18399	0.323395	0.572625	0.657091
	TUT7	0.973434	6.52294	25.6481	8.77684e-06	6.02506e-05
	ULK2	-1.38748	3.56264	44.6397	4.30249e-08	6.66548e-07
	GRHL2	-1.85403	3.52585	15.7326	0.000280905	0.00113217
	TNPO1	0.261224	6.36749	1.337	0.254146	0.345868
	PLOD1	1.34081	6.1366	8.94388	0.00465726	0.0121654
	P2RX5	0.898491	1.75264	3.40677	0.0720377	0.122115
	ITGAE	-1.9885	2.43499	112.501	2.05545e-13	1.95809e-11
	DIS3	0.0534353	5.21779	0.0753548	0.78505	0.836708
	PIBF1	-0.0853077	3.84608	0.106039	0.746328	0.805718
	TDRD3	-0.826479	4.29549	9.36542	0.00385769	0.0103751
	NUFIP1	0.0920834	2.15883	0.12388	0.726636	0.789878
	PDS5B	-0.0566314	5.42371	0.0571946	0.812158	0.857843
	OXCT1	-0.771844	2.87954	3.86227	0.0560684	0.0992668
	RRAGB	-0.0123528	2.96023	0.00620514	0.93759	0.954196
	CYLD	0.431638	6.16975	4.63294	0.0371994	0.0703256
	SLC27A5	5.02152	6.04011	138.044	8.21483e-15	1.45849e-12
	ZNF324	-0.146262	3.60497	0.251357	0.618758	0.697935
	ZNF671	-0.506427	2.45528	8.35429	0.00608393	0.015259
	ZNF416	-0.829687	0.899042	11.4031	0.00159762	0.00492341
	ZNF586	0.511757	4.14403	10.7846	0.00207779	0.00616272
	ZNF446	0.0677105	2.7303	0.0520569	0.820637	0.864751
	ZNF264	-0.428438	5.39614	10.0718	0.00282703	0.00798894
	RPS5	-0.476409	6.22738	2.2782	0.138745	0.20993
	FAT1	1.1624	7.7896	21.7141	3.22799e-05	0.000180306
	YTHDC1	-0.0473733	5.90235	0.0409209	0.840675	0.880244
	CHMP2B	0.532411	4.77316	2.56692	0.11667	0.181706
	SMAP2	0.550234	6.41924	3.95023	0.0534593	0.0954802
	PPIE	-0.0743565	4.01466	0.258301	0.613968	0.693865
	ZMPSTE24	0.559934	4.66652	5.31395	0.0262028	0.0525266
	STARD7	0.0598648	6.20957	0.0846562	0.772526	0.826809
	NOA1	0.0527213	3.43565	0.0391177	0.844177	0.883214
	REST	0.293893	5.62341	2.32715	0.134684	0.204842
	HAL	6.30689	7.08293	127.162	3.0486e-14	4.13847e-12
	SSH1	-0.113744	6.2006	0.295582	0.589561	0.671945
	GSTP1	-1.79748	5.73702	20.6106	4.72653e-05	0.000248813
	APLP2	-0.910686	8.58922	22.0373	2.89087e-05	0.000164328
	FAM234B	-0.697513	2.91384	15.3121	0.000330234	0.00129963
	SLCO1A2	0.640523	2.61665	1.1433	0.291106	0.385797
	WBP11	0.480436	5.21825	4.85204	0.0331953	0.063947
	EIF3I	-0.161255	5.62131	0.72592	0.399076	0.495169
	COL16A1	-1.40343	5.36903	6.62266	0.0137174	0.0303527
	TXLNA	0.307318	6.28187	3.10612	0.085328	0.140787
	APOB	13.0524	12.8318	149.794	2.17529e-15	5.19201e-13
	NCOA1	0.479874	6.18057	10.1669	0.00271234	0.00770898
	AGBL5	-0.127112	3.06735	0.379969	0.540971	0.628112
	EFR3B	-3.00592	2.68677	83.2495	1.72167e-11	7.82216e-10
	KIF3C	-1.11283	1.9756	18.2655	0.000109063	0.000506706
	RAB10	-0.285155	5.75946	2.11255	0.153581	0.228353
	GCKR	8.7133	5.62557	155.461	1.17987e-15	3.20336e-13
	HADHA	0.862352	7.02597	19.4766	7.04989e-05	0.000348008
	MAPRE3	0.931191	3.37126	15.3942	0.000319926	0.00126572
	CAD	0.286674	4.78789	0.898792	0.348568	0.444876
	CD59	-0.298925	8.27975	2.28983	0.137768	0.208664
	CD82	-0.721068	5.04178	4.01457	0.0516354	0.0926877
	BCORL1	-0.47721	3.43319	2.74245	0.105223	0.167004
	ATRX	-0.439683	6.80405	3.19708	0.0810386	0.134713
	AK6	-0.238987	2.44461	0.704037	0.406216	0.50222
	FCN1	-2.23804	3.9321	22.4662	2.49959e-05	0.000145047
	MYNN	-0.0478943	3.53794	0.0299839	0.863365	0.899543
	MECOM	-1.65114	5.18185	34.8135	5.66375e-07	5.95722e-06
	SCAMP1	0.242447	4.40587	0.548587	0.463046	0.556086
	PREP	0.359321	4.08129	5.5532	0.0232225	0.0474186
	HACE1	-0.429855	3.52106	5.30736	0.0262906	0.0526571
	SEH1L	-0.0811417	4.54376	0.230699	0.633517	0.71089
	WDR47	-0.74757	3.28574	15.4999	0.000307162	0.00122257
	WDFY1	0.590487	5.72519	11.2322	0.00171723	0.00523777
	OVGP1	2.36365	2.31047	35.5817	4.57419e-07	4.97503e-06
	SLC25A24	-1.95084	4.19055	72.8369	1.07957e-10	3.88859e-09
	MAP3K4	0.0587845	4.93295	0.145382	0.704924	0.771566
	PILRA	-0.621746	3.22474	3.72629	0.0603824	0.105579
	IGSF9	1.31619	2.00384	10.2226	0.0026475	0.00755138
	ABCB1	1.41679	5.0182	6.03381	0.0182828	0.0388251
	ZNF213	-0.669539	2.38647	1.86398	0.179487	0.259649
	AKR1B1	-1.79166	4.72929	24.4375	1.29851e-05	8.38393e-05
	CPNE3	0.103609	5.68329	0.181321	0.672431	0.744251
	RRN3	0.752419	5.02665	17.3795	0.000151041	0.000667469
	CTTN	-0.163015	6.77959	0.609421	0.439416	0.534037
	WNT11	-0.690661	1.36174	1.73653	0.194774	0.277774
	MTIF2	1.66631	4.57238	35.2902	4.95916e-07	5.32705e-06
	DDHD2	0.231418	4.72825	0.912624	0.344925	0.441439
	TTC39A	-0.955403	3.50231	10.1025	0.00278945	0.00790022
	EPS15	-0.166647	6.0871	0.729688	0.397866	0.494061
	ORC1	0.944241	0.983914	2.60623	0.113988	0.178179
	MGST2	1.42484	3.76946	28.664	3.416e-06	2.72878e-05
	CHERP	0.0379474	4.07396	0.0166177	0.898049	0.926237
	ATG16L1	0.803805	4.68771	32.0693	1.23829e-06	1.15382e-05
	USP40	0.378716	5.31232	2.99093	0.0911301	0.148622
	POMGNT1	0.648485	5.17207	10.2456	0.00262117	0.00748709
	RAD54L	-0.0520593	0.738711	0.00790245	0.92959	0.948856
	MAST2	0.0565429	4.95778	0.0640987	0.801375	0.849772
	DNAJA1	-0.580035	6.42486	3.26888	0.0778228	0.130124
	B4GALT1	0.557099	7.01595	6.08694	0.0178106	0.0379632
	CHMP5	-0.829481	4.14661	12.4065	0.00105179	0.00346134
	NFX1	0.774616	5.89767	27.0226	5.67756e-06	4.15207e-05
	DIMT1	0.218426	3.48331	1.15286	0.289126	0.383758
	IPO11	0.150203	3.62245	0.701107	0.407186	0.50299
	FOLH1	1.93919	1.87914	21.1147	3.96722e-05	0.000214029
	EIF2AK1	0.634743	5.40579	14.9137	0.000385432	0.00148006
	EPDR1	-0.402316	4.00457	2.5765	0.11601	0.180808
	SNX10	0.95171	5.44683	4.91793	0.0320846	0.0622045
	SEPHS1	0.746708	4.12898	25.2588	9.94668e-06	6.67827e-05
	MRPL28	0.194805	3.55264	0.646476	0.425936	0.521525
	ITPKC	-2.03134	6.00694	39.8205	1.46249e-07	1.88183e-06
	CEACAM6	-0.881701	6.40142	1.42168	0.239868	0.329834
	FAT2	0.0989765	3.23688	0.0139601	0.906514	0.932311
	RBM22	0.357127	4.50391	5.38514	0.025275	0.0509299
	TMED2	1.21513	6.60151	24.8741	1.12645e-05	7.41409e-05
	ERO1B	1.26638	4.76322	18.3381	0.000106217	0.000496243
	ZFAND6	0.401259	5.06923	3.12012	0.0846516	0.139841
	HSD17B2	4.03292	4.11449	79.644	3.19235e-11	1.33857e-09
	TXLNG	-0.322426	4.17286	2.68304	0.108948	0.171698
	LAT2	-0.56716	3.53235	2.4303	0.126569	0.194459
	HUWE1	0.16813	8.36704	1.016	0.319283	0.414737
	ZW10	1.13292	3.50004	24.6563	1.20907e-05	7.89095e-05
	ALG9	1.08907	3.88435	40.924	1.09794e-07	1.46573e-06
	MYBPC2	0.0477512	1.47219	0.00217296	0.963043	0.97249
	NOX4	-1.31138	0.099522	10.7835	0.00207876	0.00616475
	ACOX3	0.267757	3.75744	1.82853	0.18359	0.264534
	MTMR2	-0.0277884	4.53768	0.0156939	0.900908	0.928084
	PPP1R15A	-1.95412	7.34868	33.3113	8.6585e-07	8.53666e-06
	HSD17B14	-1.00404	1.59295	7.57349	0.00872992	0.0207339
	TRIP6	-0.152389	4.27135	0.190605	0.664667	0.737613
	ACHE	0.0563189	1.71895	0.00749747	0.931414	0.949794
	FTL	0.381634	10.6613	1.256	0.268823	0.361829
	SRRT	-0.631891	5.43776	7.21101	0.0103541	0.0238636
	BAX	-0.640587	3.54446	5.18413	0.0279908	0.0555317
	NLK	0.510771	3.77653	7.08913	0.0109704	0.0250527
	PIGS	-0.130868	4.094	0.534181	0.468942	0.561768
	ADAMTS2	1.26918	5.68074	11.8168	0.00134306	0.00425548
	ATXN7L3	-0.538228	4.83242	3.74298	0.0598338	0.10478
	PGS1	-0.201676	5.32892	0.447633	0.507149	0.598168
	PSMC5	-0.145241	5.01353	0.904027	0.347183	0.443474
	UIMC1	0.229248	4.34802	2.66558	0.110071	0.173079
	CETP	0.850346	0.676808	4.53083	0.0392426	0.07351
	MMP2	-0.579283	7.94908	0.957761	0.333396	0.429423
	LPCAT2	-1.19312	3.29973	17.6175	0.000138313	0.00061954
	GNAO1	2.46319	3.60702	27.2627	5.26658e-06	3.90543e-05
	OGFOD1	1.03084	4.57488	20.0453	5.76305e-05	0.000294318
	SH3BP2	0.202366	6.31576	0.526015	0.472338	0.564872
	NOP14	-0.0441852	5.0754	0.0308469	0.861433	0.898023
	ADD1	-0.186439	7.27063	1.45852	0.233972	0.323068
	L2HGDH	0.689514	2.70097	8.02307	0.00708368	0.01734
	TXNDC16	-0.227826	2.73032	0.751497	0.390964	0.487163
	RTRAF	0.491704	4.83622	4.05093	0.0506349	0.0911705
	NID2	0.519446	4.02163	2.86828	0.0978005	0.157379
	GMCL1	-0.136652	3.40146	0.459192	0.501745	0.593051
	SF3B2	-0.615117	6.6538	7.36356	0.00963432	0.0224766
	KLHL42	-0.0345056	4.45466	0.0645026	0.800764	0.849414
	GNAS	-0.299021	7.8275	3.09898	0.0856757	0.141222
	DNM1L	0.333039	5.25271	2.37036	0.131214	0.200504
	PHACTR3	-2.85266	1.90736	46.1487	2.97618e-08	4.93833e-07
	ERGIC2	0.723826	4.63026	5.75077	0.0210369	0.0436368
	TFAP2C	-3.04417	1.37392	24.5942	1.23379e-05	8.02467e-05
	AURKA	1.39283	2.48384	5.64671	0.0221589	0.0455855
	CASS4	-2.05316	3.23387	27.3342	5.1504e-06	3.83631e-05
	PIR	0.730677	2.31343	5.26566	0.026853	0.0535925
	AAMDC	-0.446995	2.09229	3.16713	0.082424	0.13666
	RFX2	-2.44565	3.1468	78.0964	4.18508e-11	1.71833e-09
	METTL2A	-0.199902	3.16349	2.07063	0.157625	0.233503
	SULT2B1	-3.12548	-0.0203471	42.9061	6.62577e-08	9.65004e-07
	ALG6	0.638042	2.30887	5.20546	0.0276882	0.0549967
	CNOT3	0.186916	4.42908	0.479057	0.492686	0.584762
	GP6	-0.632192	0.629328	2.93091	0.094328	0.152793
	PTPN4	-0.176109	4.44698	0.679188	0.414556	0.510324
	DDX18	0.216891	5.40614	1.00111	0.322813	0.418722
	KHSRP	-0.605451	5.6118	7.32644	0.00980442	0.0228195
	GNA11	-0.524042	5.21017	2.71668	0.10682	0.168897
	ASAP3	0.199865	4.58992	0.68392	0.412948	0.508719
	EDEM2	-0.0265247	4.03365	0.0114253	0.91539	0.938595
	DNMT3B	-1.87796	2.23274	8.23997	0.00641088	0.0159483
	REM1	-2.11878	-0.0463552	25.1828	1.01935e-05	6.81867e-05
	TPX2	0.454674	3.69263	0.361532	0.550912	0.63753
	FER1L4	1.00394	3.36784	4.02899	0.051236	0.092062
	PDRG1	-0.20979	1.85659	0.582806	0.449513	0.543421
	EPB41L1	-1.34713	4.35206	24.5445	1.25393e-05	8.13969e-05
	SLC15A1	5.72797	3.64453	77.1529	4.94492e-11	1.97797e-09
	DOCK9	-1.03528	6.73659	47.2304	2.29441e-08	3.96142e-07
	ANKRD10	0.53084	5.77068	15.3393	0.000326785	0.00128769
	TGDS	1.88429	2.8789	37.8864	2.4413e-07	2.91186e-06
	DOCK3	-0.563913	1.04011	2.07283	0.157409	0.233246
	C3orf18	-0.224335	1.54365	0.530418	0.470502	0.563264
	COQ9	1.9388	4.90424	60.5615	1.18597e-09	3.18408e-08
	KIF9	-0.859423	1.70677	15.6105	0.000294371	0.00118053
	ARHGAP28	-1.29973	2.73032	8.08811	0.00687438	0.0169076
	CRLS1	0.366383	4.7566	1.94777	0.170215	0.248811
	PPP1R13B	-0.620834	4.95433	9.58899	0.00349401	0.0095451
	ATRN	1.6865	6.53658	82.1207	2.08473e-11	9.29782e-10
	SMOX	2.03547	2.94518	13.1192	0.000786159	0.00270308
	SIGLEC1	-0.431068	4.79502	1.01881	0.318623	0.413979
	FKBP1A	-0.253055	6.25215	1.76002	0.191843	0.274404
	NSFL1C	0.188612	5.07807	1.28944	0.262636	0.354976
	SLC4A11	0.424876	0.350004	0.461659	0.500604	0.591993
	DNAAF9	-0.733197	4.78182	17.13	0.000165713	0.000721987
	ZNF343	0.540097	3.41797	11.9654	0.00126243	0.0040353
	EBF4	-0.465483	1.99225	1.91302	0.17399	0.253272
	CPXM1	0.273568	2.19844	0.124047	0.72646	0.789804
	MAVS	-0.152641	6.74782	0.324284	0.5721	0.656627
	LZTS3	-1.38367	3.62866	21.3778	3.62291e-05	0.000198458
	F11	4.13319	5.59168	77.9683	4.28069e-11	1.75065e-09
	XRN2	0.226221	5.63774	1.44549	0.236037	0.325341
	KIZ	0.525689	3.66607	6.35947	0.0155853	0.0338174
	DYNLL1	-0.347391	4.49205	2.41792	0.127512	0.195674
	TESC	-0.342954	1.18343	0.982083	0.327402	0.423409
	SNX5	-0.141833	5.26742	0.875976	0.354696	0.451027
	RPL6	0.0276903	7.62903	0.0131991	0.909086	0.93416
	SIRPG	0.147475	-0.740533	0.0685863	0.794696	0.844627
	MAPKAPK5	0.124198	4.92121	0.964822	0.33164	0.427669
	P2RX7	0.298568	3.71956	0.92438	0.34187	0.438104
	ESF1	-0.0716944	3.9817	0.0428757	0.836967	0.877277
	RBBP9	0.765035	3.99765	11.5296	0.00151479	0.00470622
	ANAPC5	0.927803	6.09579	70.9955	1.5202e-10	5.2494e-09
	SLC23A2	2.97091	7.05371	62.4241	8.09417e-10	2.30716e-08
	SLC8B1	0.35904	5.1992	1.13311	0.293239	0.387914
	TMEM230	0.934027	4.58862	12.899	0.000859705	0.00291671
	DZANK1	-0.60127	1.58536	6.4121	0.015191	0.0331041
	KDM2B	-0.6398	4.44735	10.5737	0.00227458	0.00664211
	CFAP61	-0.861063	0.0763387	2.13558	0.151412	0.225684
	TASP1	-0.350683	2.84478	4.37975	0.0424935	0.0786099
	OAS1	-0.0525496	4.55634	0.0175243	0.895321	0.923994
	GCN1	-0.234758	6.65291	0.819191	0.370617	0.467414
	RPLP0	0.225732	8.3895	0.579512	0.450788	0.544465
	PXN	-0.552043	6.15195	3.68593	0.0617325	0.107507
	SIRT4	1.28279	-0.395328	7.84384	0.0076964	0.0186236
	RPH3A	-0.90518	-0.298691	1.78364	0.188948	0.270942
	KIF16B	0.0251908	4.99376	0.016151	0.899483	0.927231
	TRMT6	-0.169235	2.98243	0.524252	0.473077	0.565536
	CHGB	-0.555913	0.205127	0.405996	0.527492	0.616461
	PEBP1	1.64269	7.35556	62.7759	7.53653e-10	2.17967e-08
	TBX5	-1.90892	2.96681	25.5873	8.94958e-06	6.11989e-05
	BRAP	0.421358	3.94338	5.43485	0.0246483	0.0498845
	ERP29	-0.512383	5.47941	6.96025	0.011665	0.026403
	NOS1	-2.77447	1.41666	29.541	2.61744e-06	2.1636e-05
	FUS	-0.0989915	6.38139	0.472809	0.495505	0.587511
	IGBP1	-0.662178	3.78276	14.3572	0.000479376	0.0017835
	FXYD5	-0.777887	4.1721	14.7381	0.000412774	0.00156958
	ZNF302	0.139109	4.04897	0.302233	0.585419	0.668101
	GRAMD1A	-0.274472	5.69261	0.577864	0.451428	0.54483
	FXYD3	-2.4748	3.00195	18.152	0.000113671	0.000524931
	HEPH	-0.553557	3.33006	3.53173	0.0672062	0.11542
	CDIP1	0.782815	3.85832	13.0614	0.000804823	0.00275983
	CMTM1	-0.407553	0.100264	1.41427	0.241077	0.331153
	GANAB	0.125995	7.20563	0.282274	0.598034	0.679498
	GMIP	-0.982644	4.03044	8.72226	0.00514664	0.0132431
	RBM41	0.533895	4.36642	3.52388	0.067499	0.115822
	BIRC5	-0.0178546	2.32028	0.000618504	0.980278	0.985632
	LAG3	-0.0477869	1.19793	0.0134098	0.908366	0.933686
	MLF2	0.687668	5.75958	8.25644	0.00636264	0.0158482
	OTUB2	-1.46812	1.43599	16.5562	0.000205448	0.000867145
	DDX24	-0.197354	6.9325	0.909281	0.345801	0.442195
	ZBTB25	1.15076	4.7143	48.2875	1.78487e-08	3.21188e-07
	NECAP1	0.369518	4.67462	8.68541	0.00523319	0.0134403
	ARHGAP4	-1.42095	4.38607	11.0801	0.00183167	0.00553241
	ANKRD24	0.811754	1.96525	1.93734	0.171338	0.250149
	DHX32	1.1989	4.40807	18.9125	8.62784e-05	0.000413574
	RCOR1	-0.396474	5.34255	9.58006	0.00350781	0.00957879
	GPATCH2L	0.416803	6.2374	9.27668	0.00401301	0.0107111
	LTBP4	-3.04168	5.8118	51.5289	8.41909e-09	1.68848e-07
	BLVRB	0.596538	4.65224	3.29041	0.0768862	0.128826
	SLC9A1	-1.17784	4.44547	10.8903	0.00198597	0.00592599
	SPTLC1	-0.198161	5.01047	2.15975	0.149173	0.222898
	PAPOLA	0.409101	6.87368	2.50351	0.121149	0.187486
	CCNK	0.50721	4.63739	7.61231	0.00857282	0.020437
	PCBP4	-0.254785	3.04662	0.773978	0.384032	0.480454
	RGS1	-1.79223	5.07357	17.4729	0.000145905	0.000648599
	YPEL3	-0.0295155	4.05397	0.00885502	0.92548	0.945905
	MRPS33	0.328327	2.39903	1.31518	0.257997	0.349794
	NDUFB2	0.14202	3.71634	0.27624	0.60196	0.682924
	NUDC	-0.691932	5.24853	5.60011	0.0226822	0.0464903
	MAEA	-0.417301	4.75636	3.90816	0.0546901	0.0972339
	ICAM1	-0.269225	8.90772	0.33907	0.563502	0.648851
	STRN4	-0.728483	5.19818	8.13375	0.00673141	0.0166049
	IRAK3	0.140359	6.51775	0.146973	0.703392	0.770433
	LYZ	-3.54352	6.90374	96.8643	1.94869e-12	1.22328e-10
	MUL1	-0.0720852	3.88424	0.099116	0.754463	0.811958
	TFAP4	-0.533168	2.09381	2.90728	0.0956214	0.154554
	PDCD7	-0.0913271	3.60532	0.365523	0.548731	0.635548
	SPG21	0.781583	4.87577	16.7405	0.000191692	0.000817185
	FETUB	7.75336	2.98993	70.7468	1.59281e-10	5.47401e-09
	DNAJB11	0.849856	5.14752	17.299	0.000155617	0.000683794
	P3H2	-2.62792	3.89795	73.8896	8.89926e-11	3.2817e-09
	THPO	3.68954	1.76513	52.8194	6.28915e-09	1.32751e-07
	CHRD	4.21716	5.5147	94.4732	2.81123e-12	1.67426e-10
	FLT3LG	-0.921674	0.944775	6.98784	0.0115124	0.0261176
	RAB11FIP3	-0.0606872	5.16097	0.0182521	0.893183	0.922269
	GNPTG	-0.345173	4.7228	2.43838	0.125958	0.19368
	ZNF268	-0.459692	3.85455	9.69873	0.00332897	0.00916882
	GOLGA3	-0.437879	6.83703	3.30196	0.076389	0.128151
	PABPC4	0.188437	6.49599	1.20396	0.278828	0.372763
	CD209	-0.609222	1.86104	2.0416	0.160498	0.236902
	CERS4	0.062796	3.88599	0.0583567	0.810297	0.856388
	MCOLN1	-0.885492	3.28688	8.17077	0.00661781	0.016371
	USP48	0.292207	5.51787	2.98311	0.0915396	0.149167
	EFNB1	-1.04117	4.60009	11.1059	0.00181175	0.00547761
	PDPR	0.310639	5.53983	2.75644	0.104367	0.165911
	AARS1	0.668699	6.60829	3.91209	0.0545739	0.0970799
	GLG1	-0.257955	7.06636	3.82428	0.0572385	0.100984
	KIF4A	0.582367	1.85309	0.619169	0.435806	0.530797
	TNRC6A	0.957314	6.45074	25.4372	9.39146e-06	6.35064e-05
	PLEKHG2	-1.31607	5.48374	11.2844	0.00167973	0.00513799
	NAT14	-1.70227	1.22775	13.4006	0.000701717	0.00245629
	PITPNM2	0.471286	5.04083	3.07947	0.0866324	0.142453
	EXOC1	-0.0821349	4.47573	0.217215	0.643596	0.719489
	RBM27	0.27673	4.69309	1.1021	0.299853	0.394572
	OSBPL8	-0.279121	6.25954	1.37249	0.248036	0.338721
	DTX2	0.143435	3.80128	0.103748	0.748987	0.807741
	NLRC4	-1.03344	2.57334	7.51832	0.00895847	0.0212005
	PUS7	0.6535	3.63607	5.81489	0.020376	0.0424893
	LAMB4	-0.772706	-0.337457	2.13571	0.151399	0.225681
	NRCAM	0.766868	3.88494	5.09924	0.0292313	0.0575719
	LAMB1	-0.712836	7.79126	9.73502	0.00327622	0.00904073
	SLC26A4	-0.729893	1.26333	1.12933	0.294034	0.388799
	DLD	0.819933	5.13462	9.63538	0.00342321	0.00938198
	WDR7	0.50532	5.04195	10.5234	0.00232443	0.0067604
	TXNL1	0.313829	4.56815	1.74719	0.193437	0.276265
	IL5RA	-2.9156	0.782473	31.9029	1.2997e-06	1.20228e-05
	ABCC6	2.33424	5.87519	32.8926	9.76137e-07	9.42297e-06
	CMTM6	0.656429	6.13753	8.1643	0.00663752	0.0164069
	ITGA6	-1.05046	5.93157	15.5552	0.0003007	0.00120015
	RAPGEF4	0.58955	3.875	8.26067	0.00635032	0.0158278
	MAP3K20	0.494024	6.15327	2.93875	0.0939034	0.152299
	SMPX	6.70084	0.719901	36.8922	3.1932e-07	3.66576e-06
	FH	2.36768	5.53747	80.5781	2.71561e-11	1.15427e-09
	SEL1L3	-0.569881	5.45226	4.41202	0.0417752	0.0775321
	TF	9.32902	10.6064	109.262	3.21184e-13	2.91888e-11
	CDV3	0.311362	6.97867	2.05776	0.158891	0.234978
	MYO15A	0.22641	1.58263	0.361688	0.550826	0.637465
	ALKBH5	0.235467	5.82423	1.73364	0.195138	0.278207
	APOH	10.519	9.17588	127.737	2.83849e-14	3.92688e-12
	NLRP1	-0.708224	5.37364	8.41115	0.00592796	0.014916
	PITPNM3	-0.532155	3.68066	1.03869	0.314004	0.409414
	SPAG7	-0.4208	4.03045	3.33374	0.0750397	0.126268
	ORC6	0.48998	0.990378	0.92639	0.341352	0.437559
	ZFHX4	3.65047	4.77161	65.4261	4.43682e-10	1.37472e-08
	ZC3HC1	0.285956	2.53476	1.81272	0.185456	0.266816
	ESR1	0.645867	3.83252	2.10144	0.154641	0.229803
	RGS17	-0.0491815	0.916002	0.0173824	0.895743	0.924317
	ANGPT2	-0.249479	3.38258	0.942994	0.337109	0.43328
	TMEM101	-0.368437	3.00493	2.73083	0.10594	0.167835
	CD200	-0.692806	1.71975	2.02916	0.161748	0.238342
	CCDC80	-1.33902	6.63901	5.0854	0.029439	0.057897
	PSME1	-0.345974	5.28795	4.79168	0.0342495	0.0657108
	PPP2R3C	-0.529222	3.02106	7.39728	0.00948257	0.0221846
	HAUS4	-1.001	3.19081	22.7522	2.26996e-05	0.000133941
	JPH4	-2.60464	0.383767	74.3503	8.18253e-11	3.02768e-09
	MYH7	11.6775	7.00464	33.8589	7.40962e-07	7.53098e-06
	SLC7A8	-0.986658	4.30608	5.25587	0.026987	0.0538223
	OSGEP	-0.165976	4.07518	0.633514	0.430578	0.52586
	SLC22A17	-1.43051	1.93501	22.1448	2.78709e-05	0.000159137
	RNF31	-0.334423	4.62008	2.10156	0.15463	0.229802
	SCFD1	0.781617	5.95394	12.9509	0.000841745	0.00286518
	G2E3	-0.193251	3.30129	0.651116	0.424293	0.519936
	HECTD1	0.510234	7.7536	10.8998	0.00197794	0.00590608
	HNRNPC	0.0900653	7.80383	0.212593	0.647139	0.72268
	RPGRIP1	0.622254	-0.093091	2.66512	0.110101	0.173113
	SUPT16H	-0.750143	5.86568	14.0187	0.000548078	0.00199669
	TOX4	0.122813	5.47243	0.9116	0.345193	0.441657
	GEMIN2	-0.0536892	1.13731	0.0515234	0.821543	0.865453
	TGM1	-0.531549	1.13612	1.58183	0.215496	0.301856
	TINF2	-0.177949	4.91761	1.50665	0.226536	0.314639
	SEMA6A	-0.911633	4.69397	14.0425	0.00054292	0.00198055
	TRPM7	1.37071	6.72662	38.0839	2.31549e-07	2.78279e-06
	TYRO3	-1.76132	3.02908	25.6548	8.75789e-06	6.01586e-05
	WDR76	-0.380626	2.0352	1.49184	0.228793	0.317229
	CAPN3	-0.112944	5.37696	0.0884486	0.767635	0.822994
	SNAP23	0.299658	5.27641	0.89242	0.350265	0.446517
	TBX15	4.92497	4.20084	58.948	1.66076e-09	4.24873e-08
	PHGDH	0.852836	3.67393	6.77853	0.0127254	0.0284161
	COL9A3	-0.0854002	0.0721717	0.0269111	0.870488	0.904857
	EZR	-1.64084	7.92595	24.7542	1.17117e-05	7.66196e-05
	MYL6	-1.23116	7.85921	36.6125	3.44598e-07	3.91048e-06
	AGO1	-0.101681	5.50081	0.419422	0.520776	0.610396
	TEKT2	-3.55592	0.603965	22.6296	2.36557e-05	0.00013864
	CLSPN	-1.22643	1.87402	8.30992	0.00620866	0.0155342
	RFFL	1.52697	5.89936	64.6833	5.14011e-10	1.57466e-08
	UNC13D	-1.70403	4.98887	15.4644	0.000311395	0.00123692
	MFSD11	-0.077983	3.44013	0.178397	0.674924	0.746441
	DPYSL2	-1.5645	7.31601	96.2046	2.15464e-12	1.32951e-10
	TGFB2	-1.44525	3.11951	16.162	0.000238476	0.000986795
	GPATCH2	-0.181544	3.9684	0.907708	0.346214	0.442547
	NUP50	0.421178	5.86782	4.06436	0.0502707	0.0906049
	CDC45	-0.515115	0.834402	0.665775	0.419166	0.514919
	COMT	0.202625	5.66268	0.238307	0.627989	0.706246
	ADA2	-0.956327	5.10822	10.7497	0.00210901	0.00623574
	ENSG00000093100	3.41155	3.16866	80.839	2.59626e-11	1.12332e-09
	VNN3P	3.08387	4.44486	55.161	3.74291e-09	8.60868e-08
	ECHDC1	0.161429	4.91986	0.405959	0.527511	0.616461
	LRRFIP2	0.814265	6.00492	15.8078	0.000272938	0.00110498
	SEC22C	-0.179817	4.65824	1.27334	0.265592	0.358458
	XYLB	2.60582	3.93117	45.879	3.17729e-08	5.23205e-07
	HDAC6	1.34647	6.04537	61.3575	1.00645e-09	2.7636e-08
	GABRP	-0.212122	-0.00554478	0.0914232	0.763879	0.819817
	CDC6	0.0930928	2.19047	0.0326559	0.857471	0.894452
	UPRT	0.0227207	2.78482	0.0158783	0.90033	0.927753
	CDC23	0.603372	3.91214	8.8067	0.00495403	0.0128265
	AAAS	0.71679	4.11064	12.3926	0.00105783	0.00347859
	CBX5	-0.0266798	6.46473	0.0287663	0.86614	0.901416
	FMO2	-3.34076	5.68399	90.9084	4.91484e-12	2.64889e-10
	SUCO	0.151757	4.98472	0.292928	0.591231	0.673601
	MSH2	-1.07623	2.94852	29.134	2.96042e-06	2.40916e-05
	MAP3K1	0.144532	5.36081	0.81126	0.372921	0.469584
	DHPS	0.216359	4.06923	0.961217	0.332535	0.428541
	HOOK2	-0.417856	4.43045	2.08488	0.156236	0.231682
	ARCN1	0.648158	6.55312	9.76189	0.00323776	0.00894822
	EPB41L4B	2.47638	4.66391	55.2531	3.66826e-09	8.47603e-08
	TMEM38B	1.12172	2.86096	8.549	0.00556725	0.0141583
	PSMD5	0.318576	4.26397	2.60858	0.11383	0.177985
	PTGS1	-0.973962	3.58167	13.8273	0.000591457	0.00213254
	NUP188	0.171519	5.21093	1.256	0.268823	0.361829
	CRAT	2.8426	5.5002	78.8169	3.68779e-11	1.53446e-09
	SH2D3C	-1.97175	3.57294	33.4933	8.22064e-07	8.17547e-06
	NANS	0.146129	4.70598	0.379479	0.541231	0.628336
	TBC1D2	-0.436741	5.22543	1.56093	0.218498	0.305411
	WHRN	0.333489	3.01082	0.421137	0.519929	0.609691
	CWF19L1	-0.544922	3.58699	6.93986	0.0117791	0.0266308
	SEMA4G	3.63439	4.56916	50.0303	1.18759e-08	2.25032e-07
	BTAF1	1.13015	6.77573	17.6684	0.000135741	0.000609528
	IKZF5	0.538544	3.55209	6.52382	0.0143891	0.031623
	BLNK	3.3721	5.20639	63.7268	6.22207e-10	1.85128e-08
	CYP26A1	5.8545	1.081	28.8632	3.21456e-06	2.58977e-05
	TDRD1	0.877045	0.419798	2.16543	0.148653	0.222181
	SORBS1	2.47515	7.61478	43.8526	5.22834e-08	7.84568e-07
	CRTAC1	-4.77883	3.94282	64.9562	4.869e-10	1.5022e-08
	BAMBI	0.150481	2.5113	0.228813	0.634904	0.711895
	IL11	-0.37462	1.07076	0.160134	0.691076	0.760432
	WAC	0.294031	6.59818	2.19266	0.146187	0.219069
	CREM	-0.0106875	3.72161	0.00126019	0.971851	0.978857
	NUBP2	-0.303085	3.51157	0.6349	0.430078	0.525441
	TPSD1	-3.27603	-0.648957	31.089	1.6498e-06	1.4614e-05
	SMIM24	1.61491	0.358002	5.32208	0.026095	0.0523395
	HIVEP1	0.907572	6.41012	11.3471	0.00163581	0.00502183
	TREM2	-4.03333	2.22881	64.4012	5.43701e-10	1.64933e-08
	FKBP5	-0.143923	7.8138	0.187569	0.66718	0.739574
	SRPK1	1.57085	5.58847	34.027	7.06539e-07	7.22166e-06
	BRPF3	0.149652	5.20953	0.468827	0.497316	0.58897
	MRPS18A	0.987078	3.53789	12.2745	0.0011106	0.00362632
	PGC	-1.35492	6.62049	1.58291	0.215342	0.301722
	TMEM14A	-0.104403	1.43731	0.20766	0.650972	0.725842
	EFHC1	0.280016	4.36436	1.83437	0.182906	0.263828
	HSP90AB1	-0.080947	8.77917	0.0765088	0.783452	0.835398
	CDC5L	0.0152307	5.08511	0.00535229	0.942029	0.957682
	ITPR3	-1.41463	6.84098	9.08993	0.00436196	0.0115024
	ZNF184	-0.496739	2.38981	5.40377	0.0250381	0.0505417
	DSP	1.58765	8.51639	8.6374	0.00534827	0.0136793
	SIRT1	-0.145712	4.18525	0.370005	0.546301	0.633207
	HNRNPH3	-1.1054	5.08956	21.2317	3.81005e-05	0.000206886
	IFT74	0.151229	3.25446	0.226782	0.636406	0.713248
	JAK2	-0.268605	5.05457	1.15185	0.289334	0.38394
	IL12RB1	-1.20953	1.2944	11.4316	0.00157854	0.00487086
	ABL1	-0.429995	6.24593	2.67485	0.109473	0.172353
	ACOT7	-0.890383	2.64467	10.9228	0.00195857	0.0058563
	SH3GLB1	0.147998	6.20138	0.399776	0.530657	0.619204
	CDC7	0.18769	2.04237	0.28247	0.597907	0.679428
	SYDE2	-0.824885	3.80514	9.39184	0.00381271	0.0102693
	PCSK5	-1.05765	4.22798	19.22	7.72638e-05	0.000376778
	SCD	1.96244	9.39011	18.5059	9.99351e-05	0.000471264
	TMED1	-0.506569	3.07822	2.62067	0.113021	0.176936
	ABLIM1	0.305857	7.19159	2.02086	0.162588	0.239418
	ERMP1	0.0606546	4.92282	0.0988649	0.754764	0.812242
	RAB18	0.756211	5.94686	6.26582	0.0163143	0.0351953
	NRP1	-0.509068	7.0028	7.83681	0.00772157	0.0186762
	PRTFDC1	-1.39994	0.0629853	19.9082	6.04887e-05	0.000306179
	PALMD	0.812989	4.82377	4.74057	0.0351705	0.0671268
	TSPAN15	-1.27827	3.29107	9.07351	0.00439413	0.0115713
	MACROH2A2	-0.349851	3.25302	1.9097	0.174356	0.253668
	WASHC2A	-0.601231	5.79908	16.8774	0.000182102	0.000781827
	MAST3	0.431582	4.31977	1.3747	0.247661	0.338293
	MZF1	0.199341	4.3004	0.549018	0.462872	0.555968
	OCEL1	0.328898	2.19871	1.07983	0.304724	0.399674
	MYO9B	-0.532068	6.75311	3.87752	0.0556062	0.0985691
	KCNK6	-0.973837	3.18177	12.819	0.000888193	0.00299791
	CATSPERG	-0.960487	1.2757	9.23788	0.00408298	0.0108679
	PSMD8	0.618842	5.33262	9.08109	0.00437925	0.0115406
	FBXL19	-1.26394	3.11021	8.38666	0.00599462	0.0150628
	STX1B	2.36176	1.72441	31.7568	1.35626e-06	1.24191e-05
	HSD3B7	3.31832	5.91828	40.3293	1.28076e-07	1.68085e-06
	SETD1A	-0.802159	4.2328	6.67243	0.0133919	0.0297172
	BCL7C	-1.38038	2.98151	31.0271	1.68019e-06	1.48469e-05
	EFNA2	2.86627	0.40248	19.3718	7.31821e-05	0.000359863
	CIRBP	-0.955929	6.53637	15.4167	0.000317169	0.00125596
	ATP5F1D	0.171125	3.93112	0.204092	0.653779	0.728174
	CBARP	-1.19305	-0.35082	7.1361	0.0107284	0.0245931
	PRKY	2.1298	3.6666	4.63561	0.0371476	0.0702461
	IGFALS	1.74687	1.5676	8.59133	0.00546122	0.0139269
	HNRNPM	-0.674837	6.07105	15.6471	0.000290274	0.00116604
	MARCHF2	0.14917	3.85138	0.228247	0.635322	0.712205
	NDUFB7	-1.12343	3.66054	11.5815	0.00148208	0.00462332
	TECR	0.0609492	4.3168	0.119744	0.731053	0.793566
	TIMM13	0.188291	3.39226	0.31245	0.579171	0.662462
	CDC34	0.632465	4.06341	4.50701	0.0397366	0.074288
	MTAP	0.765799	4.76351	30.6308	1.88924e-06	1.63745e-05
	MISP	-2.74504	3.08488	18.2851	0.000108288	0.000503534
	CEP170B	-0.417178	5.35204	1.14289	0.291193	0.385865
	POLR2E	0.188729	4.89148	0.380143	0.540879	0.628061
	POLRMT	0.0581503	4.40424	0.0289689	0.865674	0.901061
	CDHR5	3.74295	4.55793	59.9343	1.35092e-09	3.56215e-08
	IZUMO4	-0.109492	0.555745	0.111625	0.739976	0.80055
	RASSF7	6.30382e-05	4.30882	1.6891e-09	0.999967	0.999967
	GADD45B	-1.73795	7.26377	22.583	2.403e-05	0.000140465
	PALM	-1.46928	3.49623	13.5347	0.000664901	0.00234671
	IGF2-AS	2.04114	1.41592	6.54784	0.0142227	0.0313271
	MKNK2	0.302442	6.96114	0.943369	0.337014	0.433184
	ARVCF	-0.185419	3.41535	0.308308	0.581687	0.66452
	TRMT2A	0.00586374	4.12963	0.000344605	0.985278	0.98924
	RANBP1	-0.740172	4.22529	8.39175	0.00598069	0.0150313
	ZDHHC8	-0.452502	3.49502	1.40915	0.241918	0.332056
	KLHL22	-0.12754	3.09509	0.253714	0.617123	0.696596
	MED15	-0.279728	5.5619	0.824045	0.369217	0.465946
	SERPIND1	6.45719	6.50039	146.799	3.02782e-15	6.71063e-13
	SNAP29	0.665024	4.49169	14.7475	0.000411265	0.00156494
	CRKL	0.971278	6.38465	17.9454	0.0001226	0.000560722
	LZTR1	0.161484	5.01342	0.308567	0.581529	0.66452
	MMP11	-0.677583	1.48245	0.353329	0.555447	0.641718
	CECR2	0.914053	5.24744	11.1399	0.00178579	0.00541269
	SMARCB1	-0.404725	4.7612	4.14432	0.0481615	0.087347
	P2RX6	-0.970855	-0.346223	3.16389	0.082575	0.136869
	DERL3	-0.0513958	1.60339	0.00713972	0.933066	0.950973
	BCL2L13	0.502668	5.45251	11.2921	0.00167429	0.00512337
	DDTL	3.73778	1.86062	33.7574	7.62592e-07	7.70754e-06
	DDT	2.35617	5.56492	63.7305	6.21743e-10	1.85128e-08
	OSM	-2.48904	2.69309	13.5355	0.000664677	0.0023463
	CABIN1	-0.0275347	5.963	0.0160664	0.899745	0.927392
	TBC1D10A	-0.643371	3.94798	4.70505	0.0358265	0.0681095
	SUSD2	-3.11524	6.05096	25.8315	8.27668e-06	5.73611e-05
	SF3A1	-0.444924	5.9504	3.53473	0.0670946	0.115265
	GGT5	1.14889	4.12494	13.1324	0.000781973	0.00269103
	RNF215	-0.273948	2.88061	1.14626	0.290493	0.385242
	SEC14L2	3.75636	5.47635	142.6	4.85779e-15	9.84293e-13
	SPECC1L	0.0979117	6.24595	0.312177	0.579336	0.662551
	PPIL2	0.371072	5.18081	4.32987	0.0436306	0.0803303
	UPB1	5.67474	5.96803	146.081	3.28031e-15	7.05429e-13
	YPEL1	-0.951881	2.44422	10.4278	0.00242234	0.00700482
	SNRPD3	-0.276273	4.91925	1.74139	0.194163	0.277139
	PES1	-0.686716	4.833	9.10021	0.00434192	0.0114631
	MAPK1	0.742027	6.34245	22.4016	2.55482e-05	0.00014766
	GGT1	-0.374661	3.2154	1.56608	0.217753	0.304585
	PRODH	0.526345	4.17905	1.28403	0.263625	0.356222
	PPM1F	-0.957967	5.12942	9.45498	0.0037074	0.010028
	SLC35E4	-1.19959	1.02157	10.0959	0.00279742	0.00791661
	TOP3B	1.16155	4.22438	22.5345	2.44266e-05	0.000142276
	CYTH4	-0.392994	4.69333	1.24315	0.271251	0.364577
	ESS2	-0.765541	2.7132	7.72403	0.00813735	0.0195378
[truncated: 19,721 more rows]

## Sheet: d DEGs Classical sig.
DEGs from c; Classical signature	geneID	logFC
	APOC3	16.261
	ALB	16.0478
	FGB	14.6451
	CRP	14.5894
	GC	13.9818
	LBP	13.9369
	APCS	13.561
	APOB	13.0524
	SERPINC1	12.9513
	AFM	12.7188
	FGL1	12.448
	SAA4	12.434
	NRAP	12.1476
	F2	12.0999
	C3P1	12.0493
	C9	12.0128
	AMBP	11.8964
	ITIH1	11.8032
	MYH7	11.6775
	ORM1	11.6685
	FGA	11.6487
	GYS2	11.3857
	AHSG	11.3618
	SERPINA11	11.312
	SLCO1B1	11.3064
	ALDOB	11.2638
	CFHR1	11.2386
	APOA2	11.1715
	SAA2	11.1165
	KNG1	11.11
	APOA1	11.0988
	F9	10.9721
	ENSG00000291095	10.8086
	ORM2	10.7819
	CREB3L3	10.7786
	IGFBP1	10.7737
	SAA1	10.6773
	APOH	10.519
	F13B	10.5089
	FABP1	10.4626
	TM4SF5	10.3982
	PLG	10.3731
	HPX	10.3466
	HAO1	10.3237
	HPD	10.3086
	TAT	10.2777
	SERPINA4	10.2087
	VTN	10.0573
	HP	10.0035
	SLC2A2	9.93699
	BHMT	9.89495
	C3P1	9.87075
	SLC22A7	9.82265
	LINC02499	9.819
	G6PC1	9.77996
	SULT2A1	9.74651
	BAAT	9.7159
	PAH	9.7042
	CYP2C9	9.69462
	MAT1A	9.65063
	HAO2	9.61225
	ITIH4	9.54873
	TTR	9.54032
	APOA4	9.49134
	SLC17A1	9.48364
	ITIH2	9.41575
	PCK1	9.38465
	APOF	9.36477
	ITIH3	9.36115
	CYP4F2	9.35808
	TFR2	9.34205
	TF	9.32902
	CYP3A4	9.2854
	HRG	9.2414
	AGXT	9.23548
	ENSG00000290007	9.20104
	C8A	9.11572
	CYP2E1	9.08964
	SERPINA6	9.07042
	ACTA1	9.06505
	ANGPTL8	9.0631
	FTCD	9.05979
	AGT	8.97312
	HGD	8.93893
	UGT1A4	8.92359
	CYP2C8	8.90919
	ABCB11	8.85436
	CPN1	8.85124
	SLC13A5	8.83952
	MB	8.83244
	SLCO1B3	8.7924
	UGT2B4	8.7756
	CPS1	8.75836
	CDHR2	8.72757
	GCKR	8.7133
	CFHR2	8.69861
	HABP2	8.6604
	MYL2	8.59206
	FGG	8.50125
	ACTC1	8.50014
	UGT1A9	8.49585
	CPN2	8.49289
	A1CF	8.46903
	ACSL3P1	8.46791
	HMGCS2	8.43319
	APOA5	8.42986
	AKR1C4	8.41538
	SLC38A3	8.41233
	ASGR2	8.40536
	CRYAA	8.34542
	MBL2	8.27529
	FAM99A	8.26528
	CFHR3	8.25032
	LPA	8.24006
	CSRP3	8.22913
	UGT1A1	8.20394
	ENSG00000253215	8.20235
	MTND4P20	8.16663
	PROC	8.15549
	APOC4	8.14697
	INHBE	8.11843
	UGT2B7	8.11022
	PFKFB1	8.07498
	SLC22A1	8.05116
	PLA2G2A	8.04644
	MTTP	8.04348
	ABCG5	8.0251
	FYTTD1P1	8.01831
	SLC28A1	8.00514
	SERPINA3	7.99126
	CKM	7.98014
	PKLR	7.96655
	ADH4	7.92695
	SLC38A4	7.92507
	SLC17A2	7.89476
	ENSG00000259357	7.86269
	CFHR5	7.84569
	SPP2	7.84083
	NR1H4	7.79686
	ABCB4	7.7803
	ENSG00000280390	7.77045
	CYP8B1	7.7677
	SERPINA7	7.76767
	DPYS	7.76565
	FETUB	7.75336
	HPR	7.75093
	F12	7.7386
	C8G	7.72058
	APOC2	7.64454
	CP	7.61175
	CA5A	7.6103
	AGXT2	7.5786
	CLRN3	7.52941
	UROC1	7.52467
	CYP2B6	7.51215
	THRSP	7.51007
	UGT2B10	7.48968
	ONECUT1	7.48691
	SERPINA5	7.4832
	PLGLA	7.47337
	HJV	7.42155
	AKR7A3	7.41873
	ETNPPL	7.40059
	FCN2	7.39113
	ENSG00000287086	7.38858
	HNF4A	7.3577
	SPINK1	7.35654
	UGT2B15	7.29452
	TM4SF4	7.2911
	KLKB1	7.23878
	FAM99B	7.2335
	ACOT12	7.20817
	ENSG00000283003	7.2011
	BHMT2	7.19571
	SERPINA10	7.18652
	AKR1C6P	7.17698
	HAMP	7.15181
	MT1H	7.14709
	AZGP1	7.14517
	PRODH2	7.14151
	ACSM2B	7.11095
	SLCO1B7	7.09501
	MYBPC1	7.06125
	AZGP1P1	7.05742
	ARG1	7.05222
	CPS1-IT1	7.02627
	UGT1A3	7.01995
	GLYATL1	7.01782
	RDH16	7.01482
	GDA	6.98123
	RBP4	6.97389
	MIR122HG	6.94976
	SAA2-SAA4	6.94571
	MYOZ2	6.91035
	GCGR	6.89562
	HGFAC	6.88546
	AKR1D1	6.86105
	CCL16	6.77694
	PRAP1	6.77631
	CYP2D6	6.77473
	NR1I2	6.76725
	SDS	6.7509
	ENSG00000261012	6.73365
	ENSG00000259970	6.72896
	UGT1A6	6.72152
	NPC1L1	6.71791
	C4BPB	6.71195
	AMDHD1	6.70557
	SMPX	6.70084
	OTC	6.67843
	ENSG00000267056	6.65425
	TMEM82	6.64288
	RABGEF1P3	6.63948
	PIK3C2G	6.63818
	MOGAT2	6.61786
	ENSG00000289500	6.60608
	ENSG00000248705	6.6014
	CYP2A6	6.59795
	UGT2A3	6.59199
	INHBC	6.58217
	SLC22A9	6.57231
	OGDHL	6.56663
	ADH1C	6.55393
	SERPIND1	6.45719
	MUC13	6.45132
	CYP4F11	6.43287
	GLS2	6.39159
	PTPRH	6.38486
	SLC39A5	6.37167
	SLC25A47	6.36756
	CFB	6.34952
	PIPOX	6.33576
	CYP2C18	6.33387
	GLYAT	6.32687
	PON1	6.3256
	HAL	6.30689
	DMGDH	6.30118
	ENSG00000237158	6.29772
	ENSG00000289248	6.29768
	CFHR4	6.29554
	PROZ	6.29398
	SLC30A10	6.28965
	TRIM15	6.28256
	ENSG00000268230	6.28232
	EPO	6.26869
	ANGPTL3	6.26704
	ATP2B2	6.2434
	ENSG00000286714	6.23242
	CUX2	6.22721
	ENSG00000268854	6.22663
	RPL7AP34	6.22178
	ACSM2A	6.21401
	C8B	6.20327
	LEAP2	6.19292
	HNF4A-AS1	6.19113
	SALL1	6.17408
	LINC01687	6.17306
	SGK2	6.17204
	ACMSD	6.17096
	C6	6.15964
	OR10J6P	6.15423
	FTCD-AS1	6.15308
	PDZK1	6.15267
	ADH1A	6.14858
	PGLYRP2	6.14617
	ENSG00000291125	6.11479
	F7	6.11315
	SERPINA1	6.1125
	ALDH8A1	6.10001
	ENSG00000291105	6.08762
	AGMO	6.08623
	PNPLA3	6.0587
	ASGR1	6.05672
	AKR1C8	6.05132
	GBP7	6.04929
	MT1G	6.02089
	CYP3A7	6.01767
	ENSG00000276490	6.00996
	LINC02532	5.97849
	RTP3	5.95719
	ENSG00000228923	5.94939
	DEPDC7	5.93915
	MT1F	5.9345
	GPX2	5.92996
	ABCC2	5.91631
	GNMT	5.90284
	XDH	5.89294
	ENSG00000231683	5.88995
	ENSG00000243696	5.88798
	CYP1A2	5.8714
	ALDH1L1	5.87134
	CYP26A1	5.8545
	FNDC4	5.82738
	SLC17A4	5.82625
	ITIH4-AS1	5.81693
	PRSS3	5.77726
	GJB1	5.76462
	SERPINF2	5.76014
	ENSG00000276434	5.75966
	LINC01554	5.75813
	NAT8	5.74078
	ABCG8	5.73751
	RPL17P11	5.7357
	SLC15A1	5.72797
	F5	5.72669
	FAM83A-AS1	5.71366
	AKR7L	5.70679
	UPB1	5.67474
	GATA4	5.67431
	CPB2	5.64109
	DIO1	5.63309
	ADH6	5.63247
	MST1	5.62016
	MOGAT3	5.61351
	A1BG	5.60766
	IATPR	5.59759
	ALPK2	5.59156
	NGEF	5.59153
	ABAT	5.58517
	ADGRG7	5.57798
	METTL7B	5.57096
	LGALS4	5.56949
	NAT2	5.56628
	AOX1	5.56523
	CRHBP	5.50655
	ENSG00000288938	5.50431
	FGF21	5.49733
	ENSG00000254237	5.49154
	NBPF13P	5.49129
	LINC01595	5.48857
	ENSG00000178836	5.48817
	ENSG00000273901	5.48395
	LINC01564	5.47148
	PROX1	5.43818
	APOC1P1	5.43526
	CYP3A5	5.42399
	ACSM5	5.4095
	SLC39A14	5.3944
	RPL7AP53	5.39181
	OIT3	5.38562
	FOXA3	5.38493
	MLXIPL	5.38365
	LIPC	5.38349
	DNAJC22	5.38268
	CMYA5	5.38055
	SMOC1	5.37705
	DAO	5.36903
	ENSG00000287709	5.3676
	TTPA	5.35931
	LINC01320	5.34828
	ENSG00000222001	5.34746
	ENSG00000253523	5.3454
	ATF5	5.31462
	TDO2	5.29731
	CYP4F3	5.28826
	PDXDC2P	5.27858
	MST1P2	5.27357
	TAT-AS1	5.27203
	ENSG00000281655	5.27075
	ENSG00000288773	5.25264
	LINC01348	5.24852
	SLC51A	5.23404
	PRG4	5.21151
	SLC25A15	5.20417
	ENSG00000254990	5.18639
	MYOM1	5.18211
	CCDC198	5.17584
	CYP2C19	5.17524
	APOC4-APOC2	5.17393
	ITGB1-DT	5.16728
	LPAL2	5.16466
	GPT	5.15998
	MASP2	5.15834
	ENSG00000179577	5.15665
	AGMAT	5.14714
	MPPED1	5.13704
	ENSG00000290788	5.13123
	PKD1L3	5.12771
	WDR72	5.12668
	HNF1A	5.12309
	ENSG00000290107	5.10744
	ACY3	5.10743
	PZP	5.09609
	LRG1	5.0904
	C4A-AS1	5.0894
	DNAJB3	5.07841
	REEP6	5.07327
	AMD1P4	5.06648
	ENSG00000257181	5.04533
	ENSG00000287558	5.03579
	UNC93A	5.03179
	SLC27A5	5.02152
	ANKS4B	5.01992
	ENSG00000271774	5.00953
	PLGLB2	5.00221
	TM6SF2	4.99166
	LINC01370	4.98892
	BMP10	4.98542
	CLEC4G	4.97673
	ABCC6P1	4.97622
	TMPRSS6	4.97271
	UGT1A5	4.97085
	ENSG00000273259	4.96983
	HNF1A-AS1	4.96493
	RRAS2P1	4.95977
	SHBG	4.95823
	ENSG00000243818	4.95644
	SLC22A25	4.95612
	ENSG00000249050	4.95203
	KHK	4.94988
	RIDA	4.94144
	PPP1R3C	4.93915
	COX6B1P4	4.93368
	TBX15	4.92497
	ENSG00000254979	4.9114
	APOM	4.9088
	TDRD15	4.9039
	C5	4.89345
	GATM	4.88494
	GPAM	4.87494
	GOT1	4.87385
	ENSG00000255960	4.85381
	SLC7A9	4.85379
	PLGLB1	4.84119
	ENSG00000279878	4.81785
	PCSK6	4.81603
	SLC17A3	4.80857
	HISLA	4.79459
	LECT2	4.7933
	GOLT1A	4.78494
	CYP21A2	4.7747
	TRIM55	4.7708
	ANXA10	4.76467
	LINC01818	4.74575
	MASP1	4.73066
	HSD11B1	4.72643
	ENSG00000287956	4.72419
	TRPM8	4.72006
	HNF4G	4.71638
	NANOGP6	4.70793
	CCNG1P1	4.6949
	GBA3	4.67635
	CCL15	4.67297
	SLC25A18	4.66923
	C4B-AS1	4.66841
	CYP2A7	4.63794
	PSAT1	4.63593
	SLC27A2	4.63251
	NR1I3	4.62423
	ENPP1	4.62082
	ENSG00000231440	4.62029
	LINC02362	4.61155
	LINC00659	4.61103
	PC	4.59477
	CNDP1	4.59024
	ENSG00000284418	4.57508
	HORMAD2-AS1	4.5621
	UGT3A1	4.56148
	IGSF23	4.55869
	EHHADH	4.55383
	HRG-AS1	4.54594
	ONECUT2	4.54068
	ENSG00000279970	4.52112
	ENSG00000232710	4.51966
	SYT7	4.51319
	SHMT1	4.51306
	ENSG00000225489	4.51221
	C4B	4.49535
	GRB14	4.49053
	NEB	4.48263
	GPT2	4.47723
	SORD2P	4.47519
	CDH2	4.46376
	GAMT	4.46256
	VIL1	4.45799
	PTGR1	4.45534
	HPN	4.43476
	TTC36	4.42706
	DBH	4.42324
	OAF	4.41769
	LINC02535	4.4073
	ENSG00000290366	4.40102
	PDE11A	4.3983
	ETNK2	4.3977
	ENSG00000259203	4.38472
	AK4	4.37208
	PMCHL2	4.36878
	SYT9	4.36121
	ALDH4A1	4.34598
	ASS1	4.34033
	HNRNPA1P29	4.33463
	GJB2	4.32373
	VWCE	4.32301
	TUBBP10	4.31446
	UGT1A2P	4.30174
	ENSG00000287796	4.29665
	CLDN14	4.29508
	CXCL6	4.29139
	CES3	4.28907
	CRIP3	4.28783
	CTH	4.28317
	XPNPEP2	4.27765
	CYP4F12	4.27149
	LRRC37A7P	4.26291
	ENSG00000290549	4.25071
	ANGPTL6	4.22528
	LINC01018	4.22201
	MOCOS	4.21931
	CHRD	4.21716
	SARDH	4.21422
	TMEM45A	4.20894
	ENSG00000230647	4.20449
	ENSG00000288874	4.20348
	LINC02027	4.19815
	EFNA3	4.19561
	SERPINA12	4.17922
	STAB2	4.17511
	CRYZL2P-SEC16B	4.17165
	ERVK9-11	4.17141
	SMLR1	4.1561
	ENPP7	4.15414
	AOC4P	4.13412
	ENSG00000267385	4.13403
	F11	4.13319
	C4A	4.13257
	ENSG00000286790	4.13129
	COLEC11	4.12913
	C2orf72	4.11371
	ENSG00000231691	4.11085
	PAQR9	4.1065
	CCL15-CCL14	4.10256
	LINC02348	4.09331
	ENSG00000289857	4.08707
	FUT6	4.08452
	ENSG00000262801	4.07973
	CYP1A1	4.0552
	VNN1	4.05157
	AADAC	4.05133
	ENSG00000223492	4.03371
	HSD17B2	4.03292
	MUC3A	4.03022
	ENSG00000289220	4.02799
	TRIB3	4.02475
	TSHR	4.01501
	GPLD1	4.0057
	TNFRSF11B	4.00547
	ENSG00000284959	4.00492
	CIDEB	4.00157
	PIGFP2	3.99304
	MLIP	3.97479
	RPS2P36	3.95705
	C14orf180	3.95224
	ENSG00000262995	3.9517
	TMEM45B	3.93632
	GDF2	3.93421
	FCAMR	3.93416
	SORD	3.93394
	DBH-AS1	3.90168
	LINC02456	3.90027
	LIPC-AS1	3.89779
	ENSG00000253406	3.8886
	PDK1	3.88084
	ANG	3.87279
	NR5A2	3.87072
	PAQR9-AS1	3.86573
	SLC7A2-IT1	3.86515
	CEACAM1	3.86423
	KARS1P2	3.86023
	NR0B2	3.85696
	DNAJC12	3.85565
	UGT1A7	3.83992
	ENSG00000279611	3.82731
	ENSG00000290729	3.81998
	ENSG00000272021	3.81478
	RPL21P77	3.79706
	SEC16B	3.78882
	ENSG00000290544	3.7883
	ENSG00000271044	3.78807
	ENSG00000290116	3.78429
	SLC37A4	3.78291
	ENSG00000278886	3.77751
	MT-TS1	3.77726
	CEACAM16-AS1	3.77637
	ENSG00000235902	3.7725
	UNC5CL	3.76875
	C3	3.75944
	ASPDH	3.75642
	SEC14L2	3.75636
	TMEM171	3.75552
	CFI	3.74422
	CDHR5	3.74295
	PLA2G12B	3.742
	ST6GAL1	3.74174
	TSKU	3.73999
	DDTL	3.73778
	TMEM176A	3.73534
	SLC5A6	3.73402
	MMP8	3.72009
	ENSG00000289023	3.71637
	SLC17A9	3.70371
	ENSG00000259370	3.70312
	WNK3	3.69149
	THPO	3.68954
	CHST13	3.68097
	ENSG00000264924	3.6785
	ENSG00000253666	3.67552
	BCO2	3.67296
	ALDH6A1	3.66717
	CNGA1	3.66458
	ENSG00000279332	3.66006
	LINC02575	3.65835
	MTCO3P12	3.65771
	ZFHX4	3.65047
	PLIN4	3.64955
	SNRPGP4	3.64276
	LINC02037	3.64016
	PBLD	3.63822
	SEMA4G	3.63439
	TMEM220-AS1	3.62241
	CYP2J2	3.61754
	PPARGC1A	3.61648
	SLC10A1	3.61103
	SULT1B1	3.61027
	MTCO3P23	3.60946
	MTND3P12	3.60447
	CPP	3.60258
	ALDOC	3.58782
	DHCR7	3.57938
	SCARB1	3.56382
	CLGN	3.5625
	HSD17B13	3.56054
	CYP4A11	3.55873
	KCND3	3.55037
	ENSG00000259347	3.54705
	RPL21P87	3.54507
	PIK3AP1	3.54333
	INSIG1	3.53559
	MGST1	3.53187
	CYP2D7	3.51653
	ADCY1	3.51445
	SLC7A2	3.50765
	ENSG00000279271	3.50662
	AKR1C2	3.50617
	STEAP3	3.50242
	HPN-AS1	3.49334
	PON3	3.48194
	CKMT2	3.47743
	TMEM176B	3.47386
	ENSG00000249746	3.47307
	ACY1	3.46377
	IL17RB	3.46367
	SLC43A1	3.45764
	SERINC2	3.45741
	LINC02197	3.45601
	LINC01485	3.44842
	PLOD2	3.44272
	ENSG00000286505	3.4123
	ENSG00000093100	3.41155
	ACADSB	3.40091
	ENSG00000289983	3.39707
	CLDN2	3.39019
	NANOGP4	3.38414
	ENTPD5	3.38133
	ACAT2	3.37653
	HOGA1	3.37421
	BLNK	3.3721
	ABLIM3	3.3711
	PPARA	3.35737
	ENSG00000224570	3.35089
	FMO3	3.33743
	HHEX	3.33564
	F10	3.33395
	SYT12	3.33328
	ENSG00000285872	3.32664
	HSD3B7	3.31832
	EXOC3L4	3.31674
	DDC	3.31595
	ARSL	3.31395
	ENSG00000229740	3.31378
	LCN2	3.30023
	ENSG00000256514	3.29781
	ENSG00000236924	3.29734
	CFH	3.29037
	TENM1	3.28917
	ADRA1A	3.28744
	LIPG	3.28171
	C1S	3.27911
	TPT1P12	3.279
	ENSG00000280384	3.27709
	GLYCTK	3.26662
	CYP4A22	3.25828
	FADS6	3.25636
	LINC00862	3.25308
	HAND2	3.24548
	SHROOM1	3.24447
	GYG2	3.24166
	AQP9	3.23055
	CDO1	3.22883
	LCN12	3.22504
	ELOVL2	3.21901
	COLEC10	3.21486
	DMRTA1	3.21074
	NR1D1	3.2098
	ENSG00000280365	3.20942
	ELOVL6	3.20935
	ABCC3	3.20646
	SNRPA1-DT	3.20411
	MT1E	3.20331
	ENSG00000277566	3.2029
	ENSG00000279500	3.1993
	SSBP3-AS1	3.1935
	TLCD4	3.19179
	BDH1	3.18755
	SLC35D1	3.18548
	IGFBP2	3.18012
	PXMP2	3.17884
	GLTPD2	3.1754
	MT-CO2	3.17045
	C1R	3.16644
	SRD5A1	3.15949
	TTC39C	3.15498
	LDHD	3.15124
	SERPING1	3.14748
	RAB17-DT	3.14383
	IP6K3	3.14141
	GAS2	3.13656
	ACOX2	3.13408
	OR7A19P	3.13238
	HS3ST3B1	3.13072
	ENSG00000240291	3.12927
	DHTKD1	3.12616
	PLIN5	3.12507
	MT-CO1	3.12264
	SUGCT	3.12055
	ENSG00000279196	3.11872
	AR	3.11577
	DGAT2	3.11293
	IL22RA1	3.11256
	EPHX2	3.10794
	LINC01558	3.09543
	FBXO17	3.08803
	ASPG	3.08556
	DTX1	3.08398
	VNN3P	3.08387
	CGREF1	3.08336
	ENSG00000250860	3.07973
	HSD17B7	3.07667
	LINC00624	3.06064
	MAB21L3	3.06058
	SLC6A12	3.0579
	NAGS	3.05525
	LINC00261	3.0551
	RPL7L1P3	3.0484
	NSUN6	3.04833
	SHMT2	3.04569
	GCLC-AS1	3.03606
	DHODH	3.02978
	SF3A3P1	3.02656
	LINC00574	3.0238
	C4BPA	3.02201
	AKR1C1	3.01451
	AK4P1	3.00692
	ANPEP	3.00443
	ENSG00000280042	3.00229
	PDXP	3.00224
	MSMO1	2.99871
	DECR2	2.99626
	ENSG00000229220	2.99178
	C2orf16	2.9816
	RHOD	2.98021
	ENSG00000287200	2.97941
	ARMC12	2.97521
	GOT2	2.97338
	SLC23A2	2.97091
	CLU	2.96788
	ENSG00000187229	2.96678
	ACACB	2.96166
	TAF9BP1	2.9603
	ENSG00000277999	2.95959
	PLIN1	2.95436
	SORBS2-AS1	2.95161
	PFN1P2	2.94747
	SLC23A1	2.93746
	NUDT7	2.9363
	ADORA2A-AS1	2.93071
	PKHD1	2.93014
	HAAO	2.92927
	ENSG00000262503	2.9234
	ENSG00000289080	2.91496
	MT-CO3	2.91405
	ENSG00000274080	2.91364
	ACAT1	2.9129
	ENSG00000288065	2.90092
	ENSG00000259381	2.89776
	SLC25A10	2.89508
	KANK1	2.89202
	SLC10A5	2.89055
	ACAA2	2.88616
	CYP17A1	2.88597
	NIPSNAP1	2.88571
	IL1RN	2.87582
	MT1X	2.87544
	TST	2.86974
	ENTPD8	2.86931
	ENSG00000283402	2.86803
	AGTR1	2.86664
	ALOX12P2	2.86139
	LINC02754	2.85742
	ANXA9	2.8552
	SPATA46	2.85503
	ENSG00000283828	2.85203
	ASL	2.85048
	CRAT	2.8426
	ENSG00000205622	2.84237
	CHDH	2.83799
	ENSG00000288886	2.83695
	TMOD1	2.82718
	EBP	2.82554
	IGF1	2.82331
	MMADHC-DT	2.82192
	ENSG00000259600	2.82069
	TTC38	2.82022
	AOC4P	2.81565
	ENSG00000237115	2.81497
	SLC35C1	2.81305
	ENSG00000259575	2.8129
	FST	2.8061
	HKDC1	2.79975
	PPP1R1A	2.79925
	PHKA2	2.79921
	SLC6A1	2.79486
	PA2G4P4	2.79412
	MUC20P1	2.78759
	CBLC	2.78733
	PPP4R2P2	2.77817
	CLDN12	2.77759
	C1orf226	2.77282
	CAPN5	2.77071
	ENSG00000273350	2.76432
	7SK	2.76093
	RGN	2.75816
	PTPRJ-AS1	2.75612
	NADK2-AS1	2.75301
	GHR	2.74971
	ENSG00000287787	2.74542
	SPDYE12	2.7449
	NUGGC	2.74216
	NHERF1	2.73792
	SYPL2	2.72573
	ENSG00000272617	2.72549
	KCTD9P4	2.72308
	GPR88	2.71208
	SCN8A	2.70913
	CES2	2.7069
	RPRD1B	2.70451
	ENSG00000232034	2.70364
	GCAT	2.70273
	MYRIP	2.69369
	LRRC20	2.69362
	GLT1D1	2.69218
	KLB	2.69139
	FYB2	2.68706
	TMEM92	2.68209
	FAM162A	2.6815
	ENSG00000279557	2.67874
	TMEM97	2.67773
	TMEM177	2.67648
	ENSG00000260953	2.6759
	SLC13A3	2.67471
	ADGRA3	2.67463
	HMGCS1	2.67111
	ACAD11	2.67059
	LINC00598	2.66531
	SPAG5	2.65859
	ENSG00000263096	2.65532
	MPC1	2.65448
	SLC1A2	2.65224
	STEAP3-AS1	2.64827
	RNF152	2.64808
	ACSL1	2.64417
	CYP4V2	2.64233
	CFL1P5	2.63698
	SFXN1	2.63562
	ENSG00000286024	2.63482
	MBOAT4	2.63321
	ENSG00000277299	2.62947
	SPATA41	2.62921
	SCP2	2.61919
	RBP5	2.61778
	IDH2	2.61754
	CPB2-AS1	2.61474
	NPAS2	2.61373
	XYLB	2.60582
	ENSG00000266709	2.605
	CES1	2.60351
	SORBS2	2.59734
	MIA2	2.59435
	MIR194-2HG	2.58941
	ENSG00000231703	2.58935
	CHST4	2.58353
	PHAF1	2.57674
	CHORDC1P4	2.57244
	SLC9B2	2.56085
	SLC47A1	2.56067
	ECHDC2	2.55958
	PEMT	2.55756
	SERPINF1	2.55675
	ERO1A	2.55601
	PTPN3	2.55456
	RIMKLBP2	2.5517
	ENSG00000278967	2.54883
	LDHA	2.54609
	PRSS48	2.54244
	ENSG00000238273	2.5412
	FITM1	2.5385
	PCCA-DT	2.53704
	NADK2	2.53496
	PPP4R2P1	2.53482
	ENSG00000278983	2.52653
	RELN	2.52651
	LRRC2	2.52391
	OSGIN1	2.51896
	PPP2R1B	2.5154
	LINC01843	2.51506
	PIWIL2	2.51493
	ADHFE1	2.51474
	ABCC11	2.51339
	GNE	2.51305
	NGFR	2.51203
	SLC43A3	2.50878
	SMG1P7	2.50442
	BNIP3	2.50352
	SEPSECS	2.50196
	ENO1P3	2.50154
	PFN1P6	2.49686
	ENSG00000282221	2.49335
	ENSG00000290851	2.492
	ENSG00000280828	2.48923
	NTAN1P2	2.48832
	SHLD2P1	2.48759
	ENSG00000280164	2.48376
	GGH	2.48358
	SLC25A13	2.48292
	FAM110C	2.47648
	EPB41L4B	2.47638
	PSD3	2.47621
	SORBS1	2.47515
	ACO1	2.46696
	TMEM37	2.46486
	GNAO1	2.46319
	PDLIM1P4	2.46311
	CDA	2.46286
	LGR4	2.45867
	IYD	2.45793
	ENSG00000230826	2.45784
	RDH5	2.45632
	SLC16A2	2.45608
	ENSG00000289175	2.45546
	PLD5P1	2.45317
	ENSG00000287242	2.45032
	ABCA5	2.44991
	ADAMTS17	2.44886
	SPRYD4	2.44624
	ENSG00000273243	2.44614
	DCXR	2.44447
	ENSG00000225893	2.44387
	SLC25A30	2.4424
	ENSG00000287330	2.43993
	UBA52P8	2.43944
	MTMR4	2.43768
	ENSG00000279250	2.43703
	KYAT1	2.43599
	ENSG00000270055	2.43423
	ETFDH	2.43422
	SLC25A42	2.43293
	NNMT	2.42789
	ECHS1	2.4278
	STBD1	2.42713
	FAH	2.42634
	IDO2	2.4257
	HIGD1A	2.42301
	MFAP3L	2.41824
	BMS1P1	2.41341
	RNASE4	2.41314
	ENSG00000273295	2.41221
	PNPO	2.41072
	GCSH	2.40761
	NEAT1	2.40557
	TUBE1	2.39165
	AS3MT	2.38614
	NGLY1	2.38414
	RBKS	2.38303
	SMPDL3A	2.37997
	IFITM3	2.37768
	SLC2A10	2.37722
	TRPV1	2.37687
	MTHFD1	2.37427
	HMGCL	2.37281
	GRTP1	2.37093
	CYP39A1	2.36939
	SLC22A18	2.36834
	LINC02997	2.36777
	FH	2.36768
	PRSS53	2.36534
	OVGP1	2.36365
	STX1B	2.36176
	AQP11	2.36052
	NPIPB15	2.35705
	ENSG00000286990	2.35673
	DDT	2.35617
	LPGAT1	2.35554
	BPHL	2.35356
	GCLC	2.35336
	ENSG00000290399	2.3469
	ZNF563	2.34404
	ENSG00000285676	2.34377
	MTHFD1P1	2.34215
	BMAL2	2.34206
	MTND5P32	2.33879
	MMADHCP2	2.3378
	TP53INP1	2.33746
	SSBP3	2.33629
	CLDN1	2.33451
	ABCC6	2.33424
	POR	2.33377
	ENSG00000218313	2.32989
	GPI	2.32856
	TIGD2	2.32804
	CD1D	2.32488
	SFXN4P1	2.32436
	AGFG2	2.31762
	TRO	2.31511
	MIA2-AS1	2.31415
	ART4	2.30736
	ENSG00000267387	2.30152
	ENSG00000275481	2.30077
	SOD2	2.30041
	PHYH	2.30024
	PCK2	2.29922
	ENSG00000265907	2.29303
	WWP1-AS1	2.29254
	MYORG	2.29098
	LDHAL6FP	2.29068
	ENSG00000274397	2.28547
	SIGMAR1	2.28414
	CRYZ	2.28378
	SHFL	2.28157
	SCCPDH	2.27793
	RPS15AP10	2.27517
	ENSG00000230490	2.27077
	ENO3	2.2704
	PCBD1	2.26717
	CCDC152	2.26578
	PCCA	2.26374
	ERLIN1	2.25793
	AKR1C3	2.24671
	PCYT2	2.24615
	MPST	2.2458
	C1RL	2.23932
	SC5D	2.23629
	RETREG1	2.23033
	ASAH2B	2.22797
	NUP50-DT	2.22713
	SLC38A4-AS1	2.22561
	ENSG00000271976	2.22377
	ACADS	2.22149
	VKORC1	2.22026
	ALDH5A1	2.22003
	ENSG00000288539	2.21262
	RORA-AS1	2.21242
	F2RL1	2.20987
	C11orf24	2.20871
	CHCHD10	2.20777
	ENSG00000280120	2.2075
	OXSM	2.20747
	GRHPR	2.20676
	NNT	2.20125
	TPST1	2.20109
	PPP1R3B	2.19374
	GPRC5C	2.19321
	ACSS2	2.19251
	FRRS1	2.19243
	MVK	2.19062
	CSRP1-AS1	2.18533
	RPS4XP14	2.18254
	PECR	2.17962
	ENSG00000250602	2.17822
	ENSG00000225871	2.17199
	ENSG00000232721	2.17129
	FDX1P1	2.17094
	TSHZ2	2.16723
	TACO1	2.16552
	FADS1	2.16444
	PRKAB2	2.16019
	ENSG00000279862	2.15716
	FMO4	2.156
	SLC6A13	2.15515
	ENSG00000266598	2.15407
	ENSG00000261207	2.15375
	SFXN5	2.15303
	KCNJ13	2.15114
	ARHGEF10L	2.1474
	PANK1	2.1467
	HYAL1	2.14594
	STARD5	2.14495
	ENSG00000260012	2.13841
	SIAE	2.13805
	WNT3	2.13658
	BTF3P12	2.13367
	PROS1	2.13294
	ENSG00000249068	2.12947
	ENSG00000288025	2.12817
	ENSG00000280269	2.12415
	IDH1	2.11759
	SS18L1	2.11674
	THNSL2	2.11085
	CRYL1	2.10506
	LPIN2	2.10377
	TKFC	2.10009
	NMT2	2.09716
	CRADD-AS1	2.09524
	SLC35E1P1	2.09183
	AQP7	2.08982
	RPL5P23	2.08872
	ENSG00000225092	2.08176
	APMAP	2.0811
	SHPK	2.07539
	AGAP9	2.0736
	SELENOI	2.06964
	AK3P5	2.0685
	MTCH2	2.06777
	MAP3K20-AS1	2.06355
	IL1RL2	2.06215
	ASB13	2.0609
	SNORC	2.05974
	DENND5B	2.05867
	UQCRQ	2.05608
	ENSG00000266680	2.0543
	CHN2	2.05012
	ENPEP	2.04958
	NOS1AP	2.04771
	SEC24D	2.04566
	ENSG00000280071	2.04217
	PYGL	2.04153
	ACTR3C	2.03756
	STRADB	2.03713
	ENSG00000229052	2.03335
	TTPAL	2.02565
	SLC16A4-AS1	2.02321
	ENSG00000290879	2.02311
	ACTG1P3	2.02277
	LINC02193	2.02226
	GPAA1P2	2.0206
	KDM8	2.01952
	HOOK1	2.01774
	FAHD2A	2.01716
	ECHDC3	2.01695
	ADIPOR2	2.01605
	ENSG00000279319	2.01226
	RNF138P1	2.00855
	IFITM2	2.00808
	NDUFV2	2.00504
	GBE1	2.00492
	QPRT	2.00138
	SYT9-AS1	1.999
	EPHX1	1.99651
	RPL7AP16	1.9962
	ENSG00000252690	1.99606
	MROCKI	1.99458
	FAAH2	1.99089
	STEAP1	1.98948
	SEC24A	1.98909
	INSR	1.98771
	ENSG00000286512	1.9876
	TOMM40L	1.98518
	ENSG00000223522	1.98478
	NIT2	1.98442
	ENSG00000264044	1.98359
	CLMN	1.98242
	LACTB2	1.9824
	SLC41A2	1.97979
	RDH11	1.97776
	ATP7B	1.97704
	LONP2	1.97626
	TPD52L1	1.9747
	AIG1	1.97398
	ORAI3	1.97332
	C17orf100	1.97312
	RUSC1-AS1	1.96777
	SLC15A4	1.96524
	ENSG00000256981	1.96482
	ENSG00000285704	1.96437
	ENSG00000267293	1.96383
	GLUD1	1.96069
	ENSG00000290791	1.96004
	TSPAN6	1.95962
	SLC46A3	1.95781
	ENSG00000286994	1.95613
	LARP1B	1.95313
	EGLN1	1.95271
	MCCC2	1.95151
	ENSG00000287656	1.95132
	GSDMB	1.95021
	ENSG00000290792	1.94864
	MTSS1	1.9441
	SND1-IT1	1.94208
	METTL21AP1	1.9393
	UGDH	1.9389
	COQ9	1.9388
	ENSG00000281195	1.93621
	CLTCL1	1.93085
	ST3GAL6	1.9295
	DECR1	1.91559
	ENSG00000279433	1.91476
	MFSD9	1.90978
	GAPDHP42	1.90691
	SORL1	1.90236
	TAS2R3	1.89875
	ENSG00000280067	1.89691
	GCDH	1.89383
	GIPC2	1.89069
	WHAMMP1	1.88945
	SPATA6L	1.88743
	GSTZ1	1.8872
	C2	1.88676
	TGDS	1.88429
	PTP4A1	1.88329
	GLUD2	1.88181
	C9orf43	1.88068
	ENSG00000236576	1.8799
	TMEM254	1.87684
	RLIMP1	1.87564
	ZNF684	1.86904
	ENSG00000229502	1.86302
	ENSG00000289396	1.86172
	AASS	1.85964
	NBPF8	1.85231
	VDAC1	1.84667
	DNAJC25	1.84628
	RALGPS2	1.84453
	ENSG00000278896	1.84065
	CERS2	1.83918
	COQ8A	1.83704
	ISOC1	1.83653
	SATB2	1.8334
	SDC1	1.83218
	INSIG2	1.83116
	PAN2	1.8311
	PRKAG2	1.82963
	ENSG00000290548	1.82943
	ALAS1	1.82919
	DESI1	1.82245
	PPIF	1.82105
	SLC2A3P4	1.82069
	SEC61A2	1.81949
	ENSG00000215493	1.81439
	NCAL1	1.81254
	ENSG00000290762	1.81119
	MMUT	1.81043
	HNRNPA1P49	1.81031
	PPIAP40	1.80907
	HDHD3	1.80466
	AFMID	1.7992
	CLDN20	1.79873
	RORC	1.79831
	UGP2	1.79779
	GRPEL1	1.79696
	SCYL2P1	1.79661
	SYVN1	1.79516
	BCKDHB	1.79499
	ENSG00000289444	1.79263
	MAPK14	1.7915
	SUCLG2	1.79055
	ENSG00000279598	1.79022
	SMPD1	1.78939
	RAB4A-AS1	1.78928
	MIX23	1.78884
	PLPP6	1.78374
	ENSG00000291113	1.78325
	RPL7P52	1.78156
	NRBF2	1.7772
	H6PD	1.77396
	TOM1L1	1.77327
	TMEM140	1.77312
	AGL	1.77242
	CLYBL	1.77016
	SDHB	1.76879
	TMEM161B-DT	1.76698
	ERGIC1	1.76675
	NFS1	1.76624
	HADHB	1.76576
	ACSS3	1.76386
	GLRX	1.76382
	MMAA	1.76294
	ENSG00000278987	1.75753
	AIFM1	1.75599
	ENSG00000270116	1.75457
	OXA1L	1.75442
	RETSAT	1.75239
	AIMP2	1.75107
	MRPS31	1.74662
	HSD17B12	1.74572
	ALDH1B1	1.74515
	UFD1	1.74464
	ENSG00000279814	1.74146
	MRPL2	1.73971
	PDXDC2P-NPIPB14P	1.73729
	SMG1P6	1.73516
	THNSL1	1.73368
	AK3	1.73295
	ENSG00000279059	1.72689
	YIPF1	1.72536
	FAHD1	1.72344
	ACOX1	1.72306
	TRIM66	1.72282
	BCAR3-AS1	1.72111
	SCLY	1.72087
	ENSG00000235036	1.71967
	SMG1P5	1.71812
	MPHOSPH9	1.71479
	KLHL5	1.70971
	GCH1	1.70964
	STAP2	1.70821
	ENSG00000287466	1.70487
	SEPHS2	1.70445
	LINC01355	1.70212
	ENSG00000287322	1.70192
	LHFPL5	1.70119
	SLC31A1	1.7006
	RBM33-DT	1.69963
	DNAJA3	1.69808
	ADI1	1.69743
	SLC25A20	1.69725
	FLVCR2	1.69679
	MDH2	1.69633
	PUS3	1.69482
	TMEM220	1.69462
	ECI2	1.69333
	CPT1B	1.69136
	BABAM2	1.68843
	GFM2	1.68828
	IBTK	1.68801
	ATRN	1.6865
	ETFA	1.68318
	RPS12P26	1.67494
	TMBIM6	1.67398
	MPC2	1.67259
	CPT2	1.672
	ABHD2	1.66954
	TM2D3	1.66934
	TFG	1.66701
	MTIF2	1.66631
	KIF21A	1.66629
	EXT1	1.66606
	ENSG00000261369	1.66538
	SLC35D2	1.66523
	SAR1B	1.66498
	ZXDB	1.66314
	MARS2	1.66309
	ENSG00000261072	1.66193
	PTS	1.65968
	ENSG00000232934	1.65959
	OTULIN	1.65782
	ZDHHC23	1.65464
	CXXC5	1.65255
	NBPF20	1.65198
	OSBP	1.6515
	SAMD5	1.6507
	ENSG00000288839	1.64936
	MAIP1	1.64917
	ENSG00000286145	1.6485
	SDHA	1.64501
	ADGRG6	1.64421
	PCCB	1.64416
	TCAIM	1.6429
	PEBP1	1.64269
	MED9	1.64038
	ENSG00000279819	1.63924
	CALCRL-AS1	1.63808
	ENSG00000265194	1.63651
	ENSG00000272843	1.63579
	HSPA9	1.63552
	POLDIP2	1.63439
	GUCD1	1.6274
	MMACHC	1.62738
	MTFR1	1.62708
	MTSS2	1.62581
	HIBADH	1.6257
	PAIP2B	1.625
	NLN	1.62496
	GPHN	1.62286
	IQGAP2	1.61989
	IDE	1.61884
	ENSG00000278330	1.61823
	PHB1P12	1.61446
	GPC6	1.6126
	ENSG00000259118	1.60827
	CBR4	1.60594
	AOC2	1.60344
	ENSG00000272140	1.60239
	MRPL35	1.59893
	PDLIM5	1.59772
	ENSG00000291265	1.59698
	ANKZF1	1.5969
	PIAS2	1.59612
	PREB	1.59571
	LIAS	1.59525
	ENSG00000285865	1.59065
	C11orf54	1.59035
	ABHD14B	1.58979
	LCAT	1.58834
	N4BP2L2-IT2	1.5865
	ENSG00000291079	1.58107
	ACADVL	1.57936
	CTPS1	1.57923
	PPM1L	1.57266
	CLPX	1.57093
	SRPK1	1.57085
	DENND10	1.57034
	YIF1A	1.56284
	ENSG00000290796	1.5622
	ABHD6	1.5612
	DANT2	1.55737
	PATL1	1.55083
	ENSG00000287299	1.5496
	ADAM20	1.5494
	MEG3	1.5487
	RPSAP6	1.54657
	NUDT6	1.54652
	CYP7B1	1.54642
	MRPL37	1.54386
	MICAL3	1.54243
	KBTBD11	1.53961
	KCTD6	1.53878
	NRBP2	1.53686
	MOCS1	1.53024
	LINC01128	1.52955
	RFFL	1.52697
	ABCA1	1.52504
	ETFB	1.52478
	PSTPIP2	1.52211
	MARVELD2	1.5221
	CXCL12	1.51967
	CRADD	1.51712
	ENSG00000284428	1.51639
	GPR155	1.51633
	ASCC1	1.5163
	ENSG00000272941	1.51575
	EEF1A1P25	1.51569
	ENSG00000227417	1.51476
	DIP2C-AS1	1.51398
	ORMDL3	1.51364
	AGAP5	1.51264
	GPR180	1.51227
	GPR18	1.51037
	EGLN3P1	1.50964
	P4HB	1.50606
	LRRC8D	1.50301
	NT5C1B	1.5025
	ATP5F1B	1.49884
	ENSG00000282542	1.49464
	COG3	1.4942
	HSBP1L1	1.49263
	CHD1L	1.49173
	EEPD1	1.48188
	MAN2A1	1.48123
	FDPS	1.48068
	EBLN3P	1.47931
	BLTP3B	1.47895
	NRBF2P5	1.47729
	DAP	1.47494
	CENPV	1.47213
	PID1	1.47077
	BCKDHA	1.46935
	DCLRE1A	1.46807
	PHYKPL	1.46506
	LINC01138	1.46363
	ACVR1B	1.46007
	SLC35G1	1.45775
	FGGY	1.4556
	ENSG00000279088	1.45335
	HARS1	1.45103
	COQ10A	1.45002
	MACO1	1.44944
	ENSG00000264112	1.4473
	NBPF9	1.44689
	XPOT	1.44198
	PPFIBP2	1.44148
	HEBP2	1.43653
	FNDC3B	1.43558
	GGCX	1.43468
	HGF	1.43018
	APOL1	1.42734
	MGST2	1.42484
	RNF103	1.42433
	DUS4L	1.42404
	ABHD4	1.42105
	ENSG00000273151	1.42031
	ATR	1.41844
	PGRMC1	1.41588
	SUCLG1	1.41473
	NID1	1.41428
	PTGR2	1.41365
	CEP43	1.41358
	MRPS35	1.40998
	ZBTB20-AS1	1.40985
	SMAD1	1.40704
	SLC35B1	1.40684
	SEC23A	1.40507
	RANBP10	1.40296
	NHSL1-AS1	1.40264
	SDHAP1	1.40074
	TMEM117	1.40026
	KYNU	1.39892
	TOMM70	1.39673
	SNTB1	1.39458
	WIPI1	1.39357
	ENSG00000235066	1.39259
	C19orf12	1.39235
	TPMT	1.39191
	HIPK2	1.38941
	SPAG5-AS1	1.38821
	PHF21A	1.38775
	SPIN3	1.38653
	TUBG1	1.38637
	NSDHL	1.38629
	PCTP	1.38545
	MIA3	1.38291
	PIGL	1.38184
	GPR89B	1.37908
	LGALS8	1.37622
	CLSTN3	1.37567
	SURF4	1.37368
	NCOA2	1.37255
	LPIN1	1.37192
	PDSS1	1.37131
	COASY	1.37072
	TRPM7	1.37071
	MRPL46	1.36708
	ENSG00000276517	1.36296
	LMAN1	1.36066
	GPR89A	1.36
	PITRM1	1.35983
	MROH8	1.35893
	C1RL-AS1	1.35834
	HADH	1.3558
	ZKSCAN1	1.35187
	HDAC6	1.34647
	TRMT11	1.34476
	PPP1R3E	1.34336
	DLAT	1.34286
	ERG28	1.34165
	DUSP10	1.34095
	FRK	1.33882
	SIMC1	1.33837
	PIGHP1	1.33681
	ZNG1E	1.33453
	ENSG00000225140	1.33416
	ENSG00000271075	1.33368
	SUPV3L1	1.3331
	CYFIP2	1.32859
	IARS1	1.32803
	KDELR2	1.32771
	NBPF15	1.3246
	COX10	1.32446
	ENSG00000236194	1.32409
	DENND1A	1.31902
	CPEB3	1.31872
	ITPR2	1.31716
	ACSL5	1.31242
	NQO2	1.31157
	PARP16	1.31046
	UQCC1	1.30952
	CLCN5	1.30733
	MCFD2	1.30695
	WWP1	1.30668
	ATG2B	1.30592
	DENND2C	1.30532
	MSRA	1.30402
	USP28	1.30074
	PLD1	1.29883
	FDFT1	1.2984
	HNRNPRP1	1.29835
	ENSG00000287202	1.29762
	ALG3	1.2971
	ACAD10	1.29519
	KCTD21	1.29486
	ENSG00000279530	1.29297
	MRPS10	1.29253
	ENSG00000268573	1.28854
	NDUFS1	1.28844
	PRDX6	1.28829
	MYO18A	1.28609
	VAMP1	1.28294
	CHPT1	1.28022
	TBC1D8	1.27534
	USP31	1.27417
	DNAH14	1.27007
	MMAB	1.27007
	PGM1	1.26902
	RABEPK	1.2653
	DONSON	1.26449
	MYO19	1.26421
	SOD1	1.26342
	ENSG00000287837	1.26335
	BIVM	1.2626
	CHST15	1.26006
	APBB3	1.25978
	SIRT5	1.25927
	MRRF	1.258
	COQ6	1.2558
	MCC	1.25568
	TMEM131L	1.25487
	RCL1	1.25438
	CHP1	1.249
	LPCAT3	1.24685
	ACAD8	1.24592
	GSTK1	1.24281
	TP53INP2	1.23966
	NUP88	1.23833
	TRIM27	1.23751
	RTKN	1.23566
	UBE4A	1.23522
	EDEM3	1.23308
	ATPAF1	1.23128
	ENSG00000286314	1.23058
	ENSG00000286588	1.23044
	CHKA	1.22948
	TYRO3P	1.22799
	NDUFAF6	1.2247
	GNPNAT1	1.22069
	PANK3	1.22054
	ZBED6	1.21761
	PON2	1.21622
	TMED2	1.21513
	CCNL2	1.21238
	GSTM4	1.20998
	TRUB2	1.20652
	SEC24B	1.20534
	PDHX	1.19851
	SRPRA	1.19792
	METTL17	1.19667
	MCTS1	1.19517
	ENTPD7	1.1941
	SETD5	1.19322
	ENSG00000291060	1.19264
	MYO1E	1.19094
	PIGV	1.19001
	HSD17B4	1.18956
	SEL1L	1.18874
	PRXL2A	1.18716
	MOV10	1.18627
	SS18	1.18613
	SLC33A1	1.18423
	ALG8	1.18379
	PSMD10P1	1.18326
	EHBP1	1.18296
	ENSG00000285979	1.18225
	SLC38A9	1.18164
	WDR59	1.18114
	CDC14B	1.178
	ITCH	1.17612
	SDHAP4	1.17227
	NKIRAS1	1.16854
	AVEN	1.16515
	HACL1	1.16338
	LINC01409	1.16179
	ENSG00000291159	1.15628
	CDC16	1.15506
	DHRSX	1.15388
	DHRSX	1.15388
	MRPS22	1.15237
	ZBTB25	1.15076
	SLC38A7	1.14957
	CCNB1IP1	1.14787
	PLPP5	1.14603
	USF3	1.14567
	CERS6	1.14032
	ZBED10P	1.13825
	FAM20A	1.13747
	RMDN1	1.13713
	NDUFS2	1.13656
	R3HDM2	1.13549
	INTS10	1.13531
	ZW10	1.13292
	USP30	1.13185
	ERMARD	1.12395
	EI24	1.12181
	PMM2	1.1204
	TPP2	1.1156
	ASCC3	1.11385
	ENSG00000272599	1.11359
	VWA8	1.11186
	CNOT11	1.11009
	ALPK1	1.10992
	NEK6	1.10892
	HLCS	1.10823
	AGAP6	1.10665
	XPNPEP1	1.10629
	APOOL	1.10582
	NDUFB9	1.1048
	DDB2	1.10379
	MYO1B	1.10365
	FXN	1.10275
	SMIM12	1.10229
	NDUFA9	1.1022
	UBR4	1.10189
	LETMD1	1.09991
	ZXDC	1.09654
	MDN1	1.09616
	AOPEP	1.09529
	SEC61A1	1.0945
	ARHGAP35	1.09442
	FBXO22	1.09153
	ALOX12-AS1	1.09057
	ALG9	1.08907
	DUSP3	1.08823
	BSDC1	1.08812
	GMPPA	1.08798
	ACTR3B	1.08543
	ENSG00000279544	1.08537
	SYT17	1.08393
	DBT	1.08239
	PDHA1	1.08228
	SRP54	1.08156
	DANCR	1.07929
	NADSYN1	1.07844
	ENSG00000274265	1.07701
	AGAP4	1.07445
	MTFR1L	1.07101
	ZNF700	1.07067
	TYW5	1.06964
	SEC31A	1.06948
	RAF1	1.06927
	CS	1.06567
	SRPRB	1.0652
	ABCD3	1.06482
	SETD7	1.06302
	ERMAP	1.0629
	YPEL2	1.06024
	PCID2	1.05931
	AK2	1.0544
	LINC02980	1.05177
	NDUFAF5	1.04803
	PNISR-AS1	1.04668
	ERP44	1.04636
	EPB41	1.0455
	SLC39A9	1.04431
	FOXRED1	1.04423
	MAN1A1	1.0425
	XPNPEP3	1.04209
	SNX9	1.04107
	PDSS2	1.03981
	ADAT2	1.03525
	MED14	1.03227
	AUP1	1.03054
	ENTR1	1.02992
	ATG4A	1.0286
	MIEF1	1.02766
	ARHGEF12	1.02639
	CLCN6	1.02582
	NPIPB5	1.02531
	NTAQ1	1.02502
	PDE8A	1.02476
	ELP2	1.02431
	PLEKHA8	1.02243
	SIK3	1.02216
	NEK4	1.02158
	NEU3	1.02136
	BMAL1	1.01806
	EIF4G3	1.01746
	TMTC4	1.01696
	COX11	1.01678
	HMBOX1	1.0143
	DHRS1	1.01294
	TTC9C	1.01214
	HM13	1.00902
	MARF1	1.0089
	UROS	1.00569
	PIKFYVE	1.00366
	USP32	1.00333
	PRDM10	1.00231
	GRAMD2B	0.998432
	NDUFA10	0.997306
	DEPDC5	0.995021
	NUDT5	0.988894
	FUBP3	0.98633
	DCAF8	0.985207
	FAM136A	0.983798
	FAN1	0.980996
	TMEM192	0.980551
	PDXDC1	0.978533
	GFM1	0.977593
	ENSG00000287214	0.975327
	NDUFAF7	0.97515
	APPL2	0.974673
	TUT7	0.973434
	QRSL1	0.972285
	SUPT7L	0.971752
	DCAF6	0.968256
	TOR1B	0.967868
	MRPS25	0.966643
	TAB3	0.962297
	TNRC6A	0.957314
	ZKSCAN8	0.9566
	ATP11C	0.951472
	CDK8	0.949185
	PDCD6	0.947313
	MRPL16	0.946559
	ALS2	0.94494
	UBFD1	0.944194
	STAMBP	0.941084
	ZNF275	0.9399
	PTCD3	0.93955
	ZCCHC2	0.936039
	ANAPC5	0.927803
	FITM2	0.92515
	HPS4	0.922644
	HARS2	0.916625
	STAT3	0.913591
	ATOX1	0.913569
	NPIPB13	0.912922
	NFRKB	0.909973
	BAIAP2L1	0.903898
	CNPY2	0.894784
	PARP6	0.893544
	R3HDM1	0.889776
	AMMECR1L	0.887421
	ENSG00000291203	0.873163
	KHDC4	0.872723
	TMEM131	0.866976
	ARHGEF7	0.866093
	ARFGEF2	0.865406
	ACBD5	0.860794
	GIT2	0.858151
	NUP214	0.857658
	FAF2	0.855892
	DDX52	0.855411
	CSNK2B	0.853689
	PIK3R4	0.853514
	TNFAIP1	0.850823
	CELF1	0.846328
	TMX2	0.844445
	COX15	0.843191
	SCO1	0.842206
	FBXO7	0.840119
	SPG11	0.837104
	PSMG2	0.836162
	GBF1	0.83051
	POLR1B	0.821467
	TTI1	0.81035
	ATG16L1	0.803805
	SGPL1	0.802538
	NSUN2	0.802343
	DCAF10	0.801339
	STX17	0.80075
	TRIM68	0.800407
	WDR11	0.788591
	SMG7	0.786118
	PIGM	0.777647
	CDK5RAP1	0.776759
	NFX1	0.774616
	RNF114	0.774217
	KIAA0319L	0.772313
	MTAP	0.765799
	NBPF19	0.765562
	WDFY2	0.764504
	OCRL	0.761931
	DELE1	0.761116
	CLASP1	0.76045
	NRDC	0.756572
	GPBP1L1	0.753632
	RMC1	0.747396
	SEPHS1	0.746708
	HDAC3	0.732571
	GOSR2	0.717232
	AVL9	0.698801
	GOLGA1	0.694939
	PIGT	0.69387
	CSNK2A1	0.685599
	VPS13D	0.681815
	CDK12	0.66909
	XPO5	0.667231
	NCOA6	0.651419
	GATC	0.648357
	ATP6V0A1	0.634357
	TAF10	0.626378
	METTL16	-0.574747
	PFDN1	-0.704215
	CDC42	-0.709895
	CTNNBL1	-0.741214
	SH3YL1	-0.793232
	WASF2	-0.79479
	GNAQ	-0.798698
	HNRNPUL2	-0.819818
	TMOD3	-0.822047
	ADAM17	-0.838176
	STARD3NL	-0.838803
	SNX1	-0.847234
	LMO4	-0.863198
	TSR2	-0.870213
	SRGAP2C	-0.870365
	SMARCC2	-0.874514
	TMEM109	-0.876501
	TGFBR2	-0.881077
	MGAT4A	-0.885556
	RPA1	-0.888327
	GPD2	-0.897353
	RALA	-0.913294
	CTTNBP2NL	-0.914719
	NAF1	-0.917396
	DUT	-0.925577
	CBX1	-0.927957
	B3GNT2	-0.928907
	TBC1D9	-0.938788
	RMDN3	-0.93956
	RALY	-0.943128
	PRMT2	-0.946403
	HMGN4	-0.95782
	TPM3	-0.958587
	TOR3A	-0.963277
	CEP89	-0.973083
	RASAL2	-0.981416
	ZNF426	-0.9835
	SASH1	-0.989363
	ITPRIPL2	-0.996744
	PDAP1	-0.9981
	STARD13	-0.998296
	MAGI3	-0.998454
	IFT52	-0.999137
	NIPAL3	-0.999859
	IDS	-1.00033
	BICD2	-1.00148
	ZNF611	-1.00646
	RBM8A	-1.00662
	TRIR	-1.00709
	ARL6IP5	-1.0091
	TMEM43	-1.01118
	DAPK1	-1.01265
	DNAL1	-1.01378
	ETV3	-1.01438
	GNL1	-1.01559
	LONRF1	-1.01871
	KIAA1328	-1.01874
	BTBD9	-1.02049
	SLC12A2	-1.02522
	COPS9	-1.02673
	ITPR1	-1.02833
	RAP1A	-1.03
	PHF20	-1.03064
	CMTM4	-1.03477
	AMOTL1	-1.03516
	DOCK9	-1.03528
	SANBR	-1.04195
	ZNF880	-1.05031
	ZFPM2	-1.0531
	MAGEH1	-1.05487
	CRTAP	-1.05865
	EEIG2	-1.05916
	TSPAN7	-1.06186
	SRSF7	-1.06207
	PRKX	-1.06376
	SHE	-1.0665
	WWTR1	-1.07183
	ARAP2	-1.07607
	MSH2	-1.07623
	TNIK	-1.08051
	PARD3B	-1.08171
	MORF4L1P1	-1.08959
	MAPRE1	-1.09176
	TEK	-1.09622
	ZNF71	-1.10298
	PLEKHO1	-1.1039
	DRAP1	-1.10482
	MEF2C	-1.10991
	LAMC1	-1.11055
	ASAP2	-1.11131
	WLS	-1.11161
	RASSF3	-1.11884
	MYO9A	-1.12211
	ARPC5	-1.12233
	PPM1D	-1.12371
	CDCA7L	-1.1256
	CHMP4A	-1.12715
	EPB41L2	-1.129
	DMAC2L	-1.13244
	ZNF28	-1.13288
	H3-3B	-1.13594
	VCL	-1.1366
	SMAD9	-1.13743
	SPAG16	-1.14069
	DLC1	-1.1491
	DNMT3A	-1.14985
	SMURF2	-1.15015
	NXPE3	-1.15039
	ZNF440	-1.15266
	TSTD1	-1.15395
	ARL3	-1.16104
	UTRN	-1.16407
[truncated: 1,474 more rows]

## Sheet: e Scatter plot Fig5a
DEGs for Cytokine Release Syndrome signature (vs. uninfected) were analysed with IPA. Cytokine USRs were compared to those derived from BA.5+MP vs BA.5-MP, 6 dpi.	IPA cytokine USR	Human; z score CRS	Mouse; z score BA.5+MPvsBA.5-MP
	TNF	3.717	2.461
	IL1B	2.842	2.123
	IL1A	2.855	2.017
	OSM	2.636	2.004
	IFNL1	3.551	0
	IL6	2.276	1.207
	IL17A	1.906	1.466
	IL20	2.673	0
	IFNA2	2.59	0
	IFNG	2.34	0.068
	IFNA4	2.126	0
	WNT3A	0.088	2
	IFNL4	1.999	0
	CD40LG	1.324	-0.13
	IL17F	0	1.067
	CSF3	-0.069	1.061
	IL36A	0	0.967
	PRL	1.354	-0.421
	IL21	0	0.784
	IL5	0	0.728
	WNT5A	1.855	-1.253
	WNT1	0.587	-0.016
	CXCL8	0	0.506
	IL18	0	0.451
	CX3CL1	0.434	0
	FLT3LG	0	0.371
	IL25	0	0.18
	CCL22	0	0.141
	IL22	0	0.14
	IL7	0	0.095
	TNFSF12	0	-0.058
	IL33	1.566	-1.657
	IFNB1	0	-0.221
	SPP1	-0.025	-0.283
	CTF1	-0.31	0
	IL13	-1.216	0.777
	TNFSF11	-0.407	-0.066
	TNFSF13B	0	-0.518
	IL9	0	-0.556
	IL11	-0.567	0
	CXCL12	-1.287	0.71
	Ccl2	0	-0.583
	EDN1	-0.638	0
	IL24	-0.679	0
	IL10	-0.283	-0.568
	CCL11	0	-0.896
	IL2	-0.68	-0.294
	IFNE	0	-1.131
	LIF	0.253	-1.416
	IL27	-0.424	-0.749
	TNFSF14	0	-1.224
	PF4	0	-1.28
	CNTF	-0.42	-0.971
	CXCL2	0	-1.46
	CCL2	-1.083	-0.412
	THPO	0	-1.583
	IL1RN	0	-1.826
	CSF2	-1.177	-0.691
	IL32	0	-1.953
	Cxcl3	-1.98	0
	CCL5	-1.713	-0.305
	IL4	-1.814	-0.548
	CRH	-2.435	0
	NAMPT	-3.04	0
	CSF1	-2.037	-1.517
	EPO	-2.54	-1.025
	IL3	-2.398	-2.146

## Sheet: f Scatter plot Fig 5b
DEGs Classical signature (vs. uninfected) analysed with IPA. Cytokine USRs were compared to those derived from BA.5+MP vs BA.5-MP, 6 dpi.	IPA cytokine USR	Human; z score classical	Mouse; z score BA.5+MP vs BA.5-MP
	IL20	3.873	0
	NAMPT	3.025	0
	OSM	2.039	2.004
	VAV3	1	0
	WNT5A	0.89	-1.253
	IFNA2	0.68	0
	IL17A	0.292	1.466
	IL11	0.246	0
	IL6	0.18	1.207
	IL10	0.133	-0.568
	SPP1	0.084	-0.283
	IL1A	0.048	2.017
	TNFSF11	-0.183	-0.066
	IL33	-0.445	-1.657
	IL15	-0.546	0
	LIF	-0.672	-1.416
	CTF1	-0.708	0
	IL4	-0.71	-0.548
	CX3CL1	-0.724	0
	PRL	-0.815	-0.421
	CSF3	-0.882	1.061
	IL13	-1.096	0.777
	CD40LG	-1.19	-0.13
	TNF	-1.276	2.461
	IL1B	-1.286	2.123
	Il3	-1.292	-2.402
	IL5	-1.31	0.728
	GPR15LG	-1.414	0
	CNTF	-1.496	-0.971
	CSF1	-1.602	-1.517
	EPO	-1.623	-1.025
	IL3	-1.638	-2.146
	CRH	-1.784	0
	WNT1	-1.997	-0.016
	IL27	-2.131	-0.749
	CCL5	-2.23	-0.305
	EDN1	-2.516	0
	CSF2	-2.741	-0.691
	IFNG	-2.747	0.068
	WNT4	-2.803	0
	CXCL12	-2.876	0.71
	WNT3A	-3.45	2
	IL2	-4.199	-0.294
	CCL2	0	-0.412
	CXCL2	0	-1.46
	IL1RN	0	-1.826
	IL18	0	0.451
	CCL11	0	-0.896
	IL7	0	0.095
	TNFSF12	0	-0.058
	IL22	0	0.14
	IL32	0	-1.953
	IL21	0	0.784
	IFNE	0	-1.131
	TNFSF13B	0	-0.518
	THPO	0	-1.583
	PF4	0	-1.28
	IFNB1	0	-0.221
	IL17F	0	1.067
	IL36A	0	0.967
	CXCL8	0	0.506
	FLT3LG	0	0.371
	IL25	0	0.18
	CCL22	0	0.141
	IL9	0	-0.556
	Ccl2	0	-0.583
	TNFSF14	0	-1.224
