# Supplementary material for: Microplastics dysregulate innate immunity in the SARS-CoV-2 infected lung
Source: Front Immunol. 2024 May 13;15:1382655. doi: 10.3389/fimmu.2024.1382655 (PMC11128561; doi:10.3389/fimmu.2024.1382655)
Supplement: Supplementary file 4 [file Table_3.xlsx]

## Sheet: a Alignment summary
	Sample name	Group	Day	Aligned reads
Paired RNA-Seq reads were aligned to the mouse GRCm39 reference genome. Paired alignments were counted using Samtools	M1	MP	2	100431496
	M2	MP	2	86191378
	M3	MP	2	92078418
	M4	MP	2	87103366
	M5	MP	2	99577888
	M6	MP	2	94518854
	M1	PBS	2	90966686
	M2	PBS	2	100375284
	M3	PBS	2	105029718
	M4	PBS	2	105957740
	M5	PBS	2	91622386
	M6	PBS	2	92543254

## Sheet: b All genes +MP vs PBS 2dpi
	Ensembl_ID	HUGO_ID	logFC	logCPM	F	PValue	FDR
Microplastic vs. PBS at 2 days post delivery. Differential expression statistics for all genes from lungs of C57BL/6J mice.	ENSMUSG00000000001.5	Gnai3	0.0984732	6.53807	3.79965	0.0637446	0.320781
	ENSMUSG00000000028.16	Cdc45	-0.072132	1.35798	0.437725	0.514893	0.793532
	ENSMUSG00000000031.18	H19	2.3816	2.83075	3.36481	0.0797659	0.356623
	ENSMUSG00000000056.8	Narf	-0.0179498	4.56528	0.183025	0.672824	0.873099
	ENSMUSG00000000058.7	Cav2	0.145319	7.88854	5.96928	0.0227777	0.200497
	ENSMUSG00000000078.8	Klf6	0.370782	7.67427	27.4027	2.72969e-05	0.00628512
	ENSMUSG00000000085.17	Scmh1	0.0246352	5.77156	0.377094	0.545278	0.811261
	ENSMUSG00000000088.8	Cox5a	-0.0213369	5.57095	0.0841797	0.774349	0.919092
	ENSMUSG00000000093.7	Tbx2	-0.0066049	8.47164	0.0112482	0.91647	0.974174
	ENSMUSG00000000094.13	Tbx4	0.0714651	7.01158	1.41999	0.245734	0.586004
	ENSMUSG00000000120.7	Ngfr	-0.158276	0.630285	0.506192	0.484051	0.775039
	ENSMUSG00000000126.12	Wnt9a	-0.0213214	3.86719	0.0890803	0.768069	0.916407
	ENSMUSG00000000127.16	Fer	0.0458371	3.99336	0.714204	0.406885	0.723841
	ENSMUSG00000000131.16	Xpo6	-0.0559403	6.18379	3.21256	0.0864354	0.369
	ENSMUSG00000000134.18	Tfe3	0.0438283	6.00327	3.54059	0.0727898	0.341304
	ENSMUSG00000000142.16	Axin2	0.00471313	5.52036	0.00617284	0.938066	0.980522
	ENSMUSG00000000148.18	Brat1	-0.0568416	4.89543	1.6808	0.207864	0.547963
	ENSMUSG00000000149.11	Gna12	0.0694585	6.99496	3.18293	0.0878066	0.37177
	ENSMUSG00000000154.17	Slc22a18	0.020642	2.84657	0.0455682	0.832871	0.941955
	ENSMUSG00000000157.17	Itgb2l	-0.169957	0.51363	1.46142	0.239165	0.57966
	ENSMUSG00000000159.17	Igsf5	0.146312	4.40191	6.82852	0.0156526	0.170233
	ENSMUSG00000000167.15	Pih1d2	-0.0919467	3.06024	0.586439	0.451702	0.754759
	ENSMUSG00000000168.11	Dlat	-0.029873	5.3356	0.341045	0.564994	0.822258
	ENSMUSG00000000171.6	Sdhd	-0.0262848	6.11651	0.813745	0.376502	0.701268
	ENSMUSG00000000184.13	Ccnd2	0.149165	7.32034	15.9158	0.000590707	0.0393033
	ENSMUSG00000000194.14	Gpr107	0.017464	6.31052	0.390011	0.53853	0.807613
	ENSMUSG00000000204.17	Slfn4	-0.205039	2.94422	0.844378	0.367824	0.693525
	ENSMUSG00000000216.9	Scnn1g	0.0902714	7.5066	3.01101	0.0962801	0.388293
	ENSMUSG00000000223.14	Drp2	0.136568	0.142491	0.241796	0.62764	0.851519
	ENSMUSG00000000244.18	Tspan32	-0.466199	3.21217	22.2916	9.65221e-05	0.0144362
	ENSMUSG00000000253.14	Gmpr	-0.0226461	3.70537	0.0808742	0.778698	0.920533
	ENSMUSG00000000266.12	Mid2	0.0500622	6.14903	0.413994	0.526407	0.800683
	ENSMUSG00000000275.17	Trim25	-0.0871847	7.08857	3.96709	0.0585817	0.306647
	ENSMUSG00000000276.12	Dgke	-0.0597273	5.08905	1.42263	0.245309	0.585659
	ENSMUSG00000000278.11	Scpep1	-0.0564874	5.88775	2.69716	0.114331	0.421397
	ENSMUSG00000000282.13	Mnt	-0.118303	5.54952	5.06635	0.0344057	0.241565
	ENSMUSG00000000290.14	Itgb2	-0.152337	6.87934	5.72812	0.0253809	0.210194
	ENSMUSG00000000295.14	Hddc2	-0.162322	2.65419	2.02516	0.168332	0.49763
	ENSMUSG00000000296.9	Tpd52l1	0.14265	0.251145	1.09912	0.305511	0.63865
	ENSMUSG00000000301.17	Pemt	-0.00644914	0.541542	0.00127168	0.971865	0.992521
	ENSMUSG00000000303.13	Cdh1	0.0431673	8.59933	1.48942	0.234853	0.575184
	ENSMUSG00000000305.13	Cdh4	0.060553	2.88672	0.460363	0.504324	0.786716
	ENSMUSG00000000308.15	Ckmt1	-0.16341	4.03227	1.56848	0.223197	0.565039
	ENSMUSG00000000317.12	Bcl6b	0.525297	5.59418	49.7861	3.7485e-07	0.000273313
	ENSMUSG00000000318.17	Clec10a	-0.546473	2.65623	11.2571	0.00277939	0.0810609
	ENSMUSG00000000320.11	Alox12	0.0332193	3.34651	0.0307591	0.862336	0.954536
	ENSMUSG00000000326.14	Comt	0.017691	6.56127	0.0723913	0.79032	0.924257
	ENSMUSG00000000339.15	Rtca	0.0108264	4.26497	0.0415677	0.840265	0.9454
	ENSMUSG00000000340.11	Dbt	-0.105366	4.79428	5.66755	0.0260858	0.212809
	ENSMUSG00000000346.10	Dazap2	0.0133266	8.53415	0.319792	0.577288	0.828831
	ENSMUSG00000000355.14	Mcts1	0.0345183	3.68294	0.13723	0.714489	0.892933
	ENSMUSG00000000359.4	Rem1	0.245268	3.31303	4.91944	0.0368662	0.248987
	ENSMUSG00000000374.9	Trappc10	-0.0602463	6.26572	5.10458	0.033796	0.239419
	ENSMUSG00000000378.16	Ccm2	-0.00880897	5.05586	0.0495308	0.825875	0.939487
	ENSMUSG00000000384.16	Tbrg4	0.00594609	4.34477	0.0205309	0.887331	0.963974
	ENSMUSG00000000385.9	Tmprss2	0.0311639	6.96368	0.594224	0.448752	0.753489
	ENSMUSG00000000386.19	Mx1	-0.595381	2.66059	22.2153	9.84721e-05	0.0144804
	ENSMUSG00000000392.18	Fap	-0.199894	0.759891	2.09857	0.161132	0.487069
	ENSMUSG00000000399.11	Ndufa9	0.00137555	5.70437	0.000837144	0.977171	0.994958
	ENSMUSG00000000402.3	Egfl6	0.101928	6.33074	2.05744	0.165119	0.49334
	ENSMUSG00000000409.15	Lck	-0.292599	3.68428	6.41823	0.0186866	0.183115
	ENSMUSG00000000416.17	Cttnbp2	0.0968595	3.70563	0.868596	0.361167	0.68863
	ENSMUSG00000000420.16	Galnt1	0.0415733	6.81227	1.30481	0.26526	0.603299
	ENSMUSG00000000439.10	Mkrn2	-0.0336328	5.74946	1.35337	0.256791	0.595729
	ENSMUSG00000000440.13	Pparg	-0.0966264	3.76868	1.87381	0.184455	0.519436
	ENSMUSG00000000441.18	Raf1	0.00523065	6.73168	0.0280126	0.868564	0.957117
	ENSMUSG00000000486.14	Septin1	-0.353734	4.24779	11.3809	0.00265899	0.0802911
	ENSMUSG00000000489.8	Pdgfb	0.112331	7.45211	2.70413	0.113889	0.421242
	ENSMUSG00000000530.17	Acvrl1	0.0433199	9.63365	0.566474	0.45941	0.760156
	ENSMUSG00000000531.6	Tamalin	-0.0637315	5.05107	1.11942	0.30119	0.635501
	ENSMUSG00000000532.12	Acvr1b	0.010293	6.57914	0.0701163	0.793561	0.92575
	ENSMUSG00000000538.19	Tom1l2	0.0254811	7.07996	0.459938	0.504518	0.7868
	ENSMUSG00000000552.11	Zfp385a	-0.153395	3.85415	4.98996	0.0356612	0.245705
	ENSMUSG00000000555.9	Itga5	0.173977	6.05278	15.2754	0.000721436	0.0435324
	ENSMUSG00000000561.15	Wdr77	-0.0602608	5.381	1.72083	0.202719	0.541202
	ENSMUSG00000000562.6	Adora3	0.155624	0.431404	0.867423	0.361485	0.688758
	ENSMUSG00000000563.18	Atp5pb	0.0191089	6.83235	0.272278	0.60687	0.842478
	ENSMUSG00000000568.16	Hnrnpd	-0.0308685	6.55308	0.700011	0.411515	0.727678
	ENSMUSG00000000579.15	Dynlt1c	-0.00906713	3.84722	0.0111711	0.916755	0.974174
	ENSMUSG00000000581.9	C1d	-0.0143938	4.22342	0.0914376	0.765115	0.915157
	ENSMUSG00000000594.8	Gm2a	-0.089828	7.06268	3.99361	0.0578083	0.304695
	ENSMUSG00000000600.16	Krit1	0.00554398	5.25797	0.00847099	0.927477	0.977584
	ENSMUSG00000000605.10	Clcn4	0.0689261	6.56521	1.55901	0.224555	0.566465
	ENSMUSG00000000627.16	Sema4f	0.18977	4.71344	4.62405	0.0424364	0.264178
	ENSMUSG00000000628.11	Hk2	0.101623	4.62873	1.32234	0.262162	0.600388
	ENSMUSG00000000631.21	Myo18a	-0.0426426	7.4163	1.05455	0.315297	0.648113
	ENSMUSG00000000673.10	Haao	-0.561544	2.97	14.4576	0.000936468	0.0493592
	ENSMUSG00000000682.8	Cd52	-0.149774	5.63638	1.7827	0.195075	0.532712
	ENSMUSG00000000686.12	Abhd15	0.112651	1.69216	1.23823	0.277476	0.613524
	ENSMUSG00000000690.6	Hoxb6	0.020361	2.0312	0.0338553	0.855651	0.95206
	ENSMUSG00000000693.11	Loxl3	-0.0464803	4.22936	0.52363	0.4767	0.770092
	ENSMUSG00000000708.15	Kat2b	0.104204	6.26725	5.15837	0.0329585	0.237049
	ENSMUSG00000000711.4	Rab5b	0.0736523	7.71322	9.91699	0.00454528	0.0984071
	ENSMUSG00000000732.10	Icosl	-0.2183	5.35891	8.95212	0.00657813	0.116405
	ENSMUSG00000000738.19	Spg7	0.0134295	5.48159	0.12566	0.726252	0.899221
	ENSMUSG00000000739.15	Sult5a1	-0.0332792	3.49048	0.0729883	0.789479	0.924117
	ENSMUSG00000000740.13	Rpl13	-0.0183308	8.40693	0.100144	0.754553	0.912077
	ENSMUSG00000000743.10	Chmp1a	-0.0538877	6.49185	2.27453	0.145329	0.466198
	ENSMUSG00000000751.14	Rpa1	-0.0629365	6.01635	3.26018	0.0842824	0.364706
	ENSMUSG00000000753.16	Serpinf1	-0.307065	4.65122	6.494	0.0180804	0.180527
	ENSMUSG00000000759.15	Tubgcp3	-0.0544844	5.96907	2.74951	0.111062	0.416024
	ENSMUSG00000000776.14	Polr3d	0.0561476	3.94556	1.34385	0.258425	0.596829
	ENSMUSG00000000782.17	Tcf7	-0.0873929	5.21337	1.98768	0.17216	0.502558
	ENSMUSG00000000787.13	Ddx3x	0.112461	8.45728	1.72767	0.201856	0.54038
	ENSMUSG00000000791.10	Il12rb1	-0.440064	0.461592	3.83457	0.0626264	0.317821
	ENSMUSG00000000792.3	Slc5a5	-0.145405	-0.374415	0.678477	0.418695	0.732675
	ENSMUSG00000000794.10	Kcnn3	-0.0121711	3.46235	0.0156419	0.901573	0.969049
	ENSMUSG00000000804.15	Usp32	0.000296593	5.48995	5.06187e-05	0.994386	0.998097
	ENSMUSG00000000805.19	Car4	0.0191565	7.59454	0.130423	0.721338	0.896652
	ENSMUSG00000000811.15	Txnrd3	0.18645	4.47279	13.3929	0.00132823	0.0594282
	ENSMUSG00000000817.11	Fasl	0.327647	-0.206368	4.23547	0.0512668	0.287156
	ENSMUSG00000000823.17	Zfp512b	-0.00204158	6.31832	0.00294502	0.957197	0.987617
	ENSMUSG00000000826.17	Dnajc5	0.0223346	7.42846	0.554971	0.463949	0.763301
	ENSMUSG00000000827.19	Tpd52l2	0.0498484	6.17132	1.99249	0.171662	0.501915
	ENSMUSG00000000838.18	Fmr1	-0.0019447	5.02619	0.000991647	0.975154	0.99385
	ENSMUSG00000000861.16	Bcl11a	-0.507356	2.67193	19.2399	0.000221266	0.0220782
	ENSMUSG00000000876.12	Pxmp4	-0.00792759	5.42015	0.0375981	0.84798	0.948925
	ENSMUSG00000000881.13	Dlg3	0.00369073	5.43605	0.00836181	0.927944	0.977671
	ENSMUSG00000000884.18	Gnb1l	-0.126709	1.91302	1.33204	0.260468	0.59894
	ENSMUSG00000000901.18	Mmp11	0.0138911	5.8654	0.0445098	0.834793	0.942833
	ENSMUSG00000000902.14	Smarcb1	0.02484	6.09777	0.462612	0.503295	0.786022
	ENSMUSG00000000903.4	Vpreb3	-0.00816584	4.0566	0.00452525	0.946957	0.983114
	ENSMUSG00000000915.16	Hip1r	-0.0147032	6.78358	0.109132	0.744169	0.907438
	ENSMUSG00000000916.16	Nsun5	-0.0042753	4.10347	0.00813184	0.928939	0.97824
	ENSMUSG00000000934.10	Top1mt	-0.0214706	2.28314	0.0963191	0.759128	0.91324
	ENSMUSG00000000942.11	Hoxa4	0.0345192	3.13826	0.237472	0.630718	0.853085
	ENSMUSG00000000957.12	Mmp14	-0.0515618	6.40322	0.681972	0.417517	0.732077
	ENSMUSG00000000958.11	Slc7a7	0.0107871	4.416	0.0392148	0.844789	0.947897
	ENSMUSG00000000959.8	Oxa1l	-0.0196112	5.5879	0.256358	0.617523	0.847296
	ENSMUSG00000000976.14	Heatr6	-0.0134924	4.93609	0.202867	0.656696	0.865059
	ENSMUSG00000000982.6	Ccl3	-0.810829	0.657149	4.69474	0.0410219	0.260939
	ENSMUSG00000001014.7	Icam4	-0.207252	0.0679644	1.16072	0.292651	0.627231
	ENSMUSG00000001016.13	Ilf2	-0.0160489	5.71037	0.161976	0.691115	0.882309
	ENSMUSG00000001017.16	Chtop	0.0713207	6.88427	2.56622	0.123015	0.43399
	ENSMUSG00000001018.16	Snapin	0.037544	6.24673	1.28659	0.268532	0.606798
	ENSMUSG00000001020.9	S100a4	-0.132031	4.52046	1.20897	0.283078	0.619459
	ENSMUSG00000001025.9	S100a6	0.132765	7.63872	1.65657	0.211057	0.551731
	ENSMUSG00000001027.8	Scn4a	-0.299031	1.96882	1.79817	0.19322	0.530128
	ENSMUSG00000001029.16	Icam2	0.193927	7.51174	12.7594	0.00164454	0.0640567
	ENSMUSG00000001034.18	Mapk7	0.0575255	5.25906	1.19725	0.285366	0.621904
	ENSMUSG00000001036.18	Epn2	0.0208497	7.59325	0.330703	0.570911	0.824832
	ENSMUSG00000001039.13	B9d1	-0.0777531	3.19326	1.18551	0.287679	0.623803
	ENSMUSG00000001052.16	Sec24b	-0.067896	6.42511	4.75913	0.0397795	0.257339
	ENSMUSG00000001053.16	N4bp3	0.108071	5.18611	1.58792	0.220445	0.562174
	ENSMUSG00000001054.10	Rmnd5b	-0.0124787	4.84069	0.094704	0.76109	0.913904
	ENSMUSG00000001056.4	Nhp2	0.00930684	3.79825	0.0163688	0.899324	0.968507
	ENSMUSG00000001062.19	Vps9d1	0.00313262	4.84934	0.00608626	0.938501	0.980526
	ENSMUSG00000001065.16	Zfp276	0.0450684	5.20365	0.923567	0.346682	0.676215
	ENSMUSG00000001082.13	Mfsd10	0.0328027	4.85712	0.716757	0.40606	0.723407
	ENSMUSG00000001089.15	Luzp1	0.00418672	6.5795	0.00663586	0.935791	0.980037
	ENSMUSG00000001095.6	Slc13a2	-0.174733	-0.167725	0.527803	0.474969	0.769516
	ENSMUSG00000001098.16	Kctd10	0.172195	8.74365	16.9577	0.000430025	0.0330149
	ENSMUSG00000001100.11	Poldip2	0.0356108	5.69231	0.590142	0.450295	0.754099
	ENSMUSG00000001105.16	Ift20	0.133897	5.54405	8.19522	0.00887987	0.131443
	ENSMUSG00000001119.8	Col6a1	-0.066005	8.40828	1.22854	0.279315	0.615196
	ENSMUSG00000001120.16	Pcbp3	-0.000843206	4.49728	0.00024481	0.987653	0.997353
	ENSMUSG00000001123.16	Lgals9	0.0591904	6.85391	1.40971	0.247401	0.58715
	ENSMUSG00000001127.13	Araf	-0.0339684	6.65277	1.6819	0.20772	0.547917
	ENSMUSG00000001128.8	Cfp	-0.00757317	4.13768	0.00489455	0.944838	0.982221
	ENSMUSG00000001131.12	Timp1	-0.209949	2.10798	1.89306	0.182302	0.5167
	ENSMUSG00000001134.10	Uxt	-0.0215006	2.79207	0.0805667	0.779108	0.920533
	ENSMUSG00000001138.14	Cnnm3	-0.0210674	5.56337	0.23976	0.629085	0.852381
	ENSMUSG00000001143.14	Lman2l	-0.00516274	5.01971	0.0158877	0.900807	0.968878
	ENSMUSG00000001150.8	Mcm3ap	-0.0249063	5.83185	0.413025	0.526887	0.801181
	ENSMUSG00000001151.11	Pcnt	-0.0362321	6.77059	1.00768	0.326057	0.658018
	ENSMUSG00000001156.10	Mxd1	0.151611	5.36844	6.2383	0.020219	0.190181
	ENSMUSG00000001157.14	Gmcl1	0.0338753	4.09216	0.314008	0.580729	0.830263
	ENSMUSG00000001158.14	Snrnp27	0.0188867	4.75028	0.0940839	0.761848	0.91408
	ENSMUSG00000001166.18	Oas1c	-0.0696995	2.90344	0.802512	0.37976	0.703199
	ENSMUSG00000001173.16	Ocrl	0.035228	5.45327	1.04736	0.316917	0.649698
	ENSMUSG00000001175.17	Calm1	0.115272	9.36773	8.41793	0.00812167	0.125771
	ENSMUSG00000001211.16	Agpat3	-0.0215673	7.29363	0.377352	0.545141	0.811245
	ENSMUSG00000001227.13	Sema6b	-0.192639	3.57898	4.6711	0.041489	0.26171
	ENSMUSG00000001228.15	Uhrf1	-0.0724671	2.62505	0.216433	0.646211	0.860397
	ENSMUSG00000001229.10	Dpp9	0.00418233	6.25029	0.00783624	0.930239	0.978597
	ENSMUSG00000001240.14	Ramp2	0.10107	8.3886	2.2127	0.15066	0.474694
	ENSMUSG00000001247.17	Lsr	0.0473893	5.45059	1.15561	0.29369	0.628539
	ENSMUSG00000001248.16	Gramd1a	0.0807991	6.2597	5.75543	0.0250701	0.208607
	ENSMUSG00000001249.15	Hpn	-0.227293	3.59572	7.56475	0.011485	0.146467
	ENSMUSG00000001270.10	Ckb	-0.100107	6.03608	1.56812	0.223249	0.565039
	ENSMUSG00000001280.14	Sp1	-0.0383517	6.829	0.338192	0.566614	0.82311
	ENSMUSG00000001281.11	Itgb7	-0.27392	5.16177	9.58928	0.00514541	0.10418
	ENSMUSG00000001285.13	Myg1	0.0120472	4.75793	0.0808269	0.778761	0.920533
	ENSMUSG00000001288.16	Rarg	0.0590466	6.67754	0.908966	0.350447	0.679846
	ENSMUSG00000001289.13	Pfdn5	0.00704488	6.85565	0.019198	0.891024	0.965421
	ENSMUSG00000001300.17	Efnb2	0.191456	7.92564	8.53148	0.00776284	0.123605
	ENSMUSG00000001305.6	Rrp15	-0.0221052	3.35734	0.147644	0.704378	0.888611
	ENSMUSG00000001313.13	Rnd2	-0.00237893	3.52263	0.00118926	0.972792	0.992942
	ENSMUSG00000001323.18	Srr	0.0202086	5.22859	0.250579	0.621494	0.848903
	ENSMUSG00000001333.10	Sync	-0.0814764	1.31839	0.250813	0.621332	0.848903
	ENSMUSG00000001334.10	Fndc5	-0.453308	3.53081	2.60766	0.120185	0.429732
	ENSMUSG00000001348.16	Acp5	-0.187832	4.3901	2.92376	0.100941	0.397528
	ENSMUSG00000001349.6	Cnn1	0.2191	4.68629	1.29046	0.267833	0.606264
	ENSMUSG00000001366.15	Fbxo9	0.0851962	5.47123	5.29646	0.0309131	0.229507
	ENSMUSG00000001376.18	Vps50	-0.00081079	4.44017	0.000161712	0.989965	0.997779
	ENSMUSG00000001380.8	Hars	0.0508689	5.2596	2.20739	0.151129	0.475211
	ENSMUSG00000001383.10	Zmat2	-0.0156759	5.92207	0.231457	0.635057	0.855091
	ENSMUSG00000001403.14	Ube2c	0.28905	1.77992	0.323269	0.575241	0.82842
	ENSMUSG00000001415.11	Smg5	0.0404311	6.26671	1.86193	0.185798	0.520786
	ENSMUSG00000001416.14	Cct3	0.0278371	6.51151	0.728048	0.402444	0.720803
	ENSMUSG00000001418.14	Glmp	0.0648648	6.77752	2.12381	0.158742	0.485065
	ENSMUSG00000001419.18	Mef2d	0.0634035	7.36967	4.43247	0.0465547	0.274542
	ENSMUSG00000001420.14	Tmem79	0.221022	2.74056	1.46804	0.238136	0.578583
	ENSMUSG00000001424.15	Snd1	-0.0423247	6.75842	0.723605	0.403861	0.721549
	ENSMUSG00000001435.16	Col18a1	-0.0264005	6.04535	0.218687	0.644508	0.85995
	ENSMUSG00000001436.16	Slc19a1	-0.19569	2.98883	6.67238	0.0167375	0.176557
	ENSMUSG00000001440.6	Kpnb1	-0.00319461	7.46639	0.0171738	0.896893	0.967472
	ENSMUSG00000001441.14	Npepps	0.0541005	6.43906	1.01963	0.323266	0.654801
	ENSMUSG00000001444.3	Tbx21	-0.0998696	1.77334	0.464481	0.502442	0.785403
	ENSMUSG00000001445.11	Mrpl10	0.00527946	5.41264	0.0219331	0.883575	0.962185
	ENSMUSG00000001467.6	Cyp51	0.173732	5.06681	6.78742	0.0159304	0.171874
	ENSMUSG00000001472.18	Tcf25	-0.001677	8.47518	0.00427677	0.948431	0.983705
	ENSMUSG00000001473.8	Tubb6	0.133561	4.42665	1.74468	0.199729	0.53795
	ENSMUSG00000001482.16	Def8	-0.0876433	5.13051	4.06824	0.0556939	0.298495
	ENSMUSG00000001493.10	Meox1	0.025094	4.5312	0.122794	0.729259	0.90078
	ENSMUSG00000001496.16	Nkx2-1	0.153556	7.50632	8.86169	0.00681494	0.117841
	ENSMUSG00000001497.19	Pax9	0.261593	0.380327	0.148843	0.703241	0.887944
	ENSMUSG00000001504.11	Irx2	0.500829	5.79412	59.3234	9.02012e-08	9.86519e-05
	ENSMUSG00000001506.11	Col1a1	-0.0694704	7.77716	0.450709	0.508784	0.78941
	ENSMUSG00000001507.17	Itga3	0.0840096	8.3399	4.27839	0.050196	0.284389
	ENSMUSG00000001508.16	Sgca	-0.557	0.693516	3.28312	0.0832676	0.362538
	ENSMUSG00000001517.15	Foxm1	0.0817208	2.91898	0.279858	0.601937	0.840346
	ENSMUSG00000001518.13	Itfg2	-0.0263219	4.43025	0.360178	0.554361	0.815808
	ENSMUSG00000001520.13	Nrip2	-0.0922785	-0.306138	0.249073	0.622538	0.849551
	ENSMUSG00000001521.13	Tulp3	0.0436899	5.24942	1.27615	0.27043	0.608259
	ENSMUSG00000001524.15	Gtf2h4	-0.0584909	3.29972	0.72751	0.402616	0.720803
	ENSMUSG00000001525.11	Tubb5	0.150041	8.03959	3.81911	0.0631186	0.319375
	ENSMUSG00000001542.8	Ell2	0.126021	4.91269	5.428	0.0290962	0.223254
	ENSMUSG00000001552.15	Jup	0.0140169	8.93712	0.0449179	0.834049	0.942588
	ENSMUSG00000001555.11	Fkbp10	0.0116919	4.87376	0.0261336	0.873007	0.958891
	ENSMUSG00000001569.11	Nom1	0.00373649	5.15817	0.0133836	0.908919	0.971251
	ENSMUSG00000001576.16	Ergic1	0.00491445	6.25716	0.0179895	0.894488	0.966814
	ENSMUSG00000001583.14	Tnk1	-0.0877708	3.85745	2.99262	0.0972413	0.390819
	ENSMUSG00000001588.13	Acap1	-0.336314	4.4622	9.00229	0.00645069	0.115548
	ENSMUSG00000001604.15	Tcea3	-0.0408491	4.99286	0.520486	0.478011	0.77073
	ENSMUSG00000001627.13	Ifrd1	0.0673648	5.40902	1.8478	0.187412	0.522384
	ENSMUSG00000001630.14	Stk38l	0.0582844	4.82927	2.03989	0.166856	0.4963
	ENSMUSG00000001632.17	Brpf1	0.0387188	5.89233	0.911299	0.349841	0.679444
	ENSMUSG00000001642.19	Akr1b3	0.0752361	6.72961	1.65849	0.210802	0.551382
	ENSMUSG00000001663.11	Gstt1	0.0657396	6.37292	1.0887	0.307761	0.641499
	ENSMUSG00000001665.12	Gstt3	-0.0830533	5.79674	4.96207	0.0361325	0.246673
	ENSMUSG00000001666.9	Ddt	-0.011557	4.62324	0.0247501	0.876384	0.959585
	ENSMUSG00000001670.14	Tat	0.12718	-0.508563	0.379434	0.544044	0.810714
	ENSMUSG00000001672.15	Marveld3	0.035738	3.53691	0.68599	0.416169	0.731398
	ENSMUSG00000001674.12	Ddx18	-0.109151	5.10109	7.16644	0.0135617	0.159917
	ENSMUSG00000001687.16	Ubl3	0.0877757	7.43201	7.10337	0.0139272	0.161805
	ENSMUSG00000001700.11	Gramd3	-0.0830759	4.22916	1.3731	0.253452	0.592766
	ENSMUSG00000001707.9	Eef1e1	0.0496505	2.7764	0.382031	0.54268	0.809776
	ENSMUSG00000001729.15	Akt1	0.0100105	7.62258	0.0796504	0.780333	0.921304
	ENSMUSG00000001739.15	Cldn15	0.278272	4.05242	4.90265	0.0371598	0.25006
	ENSMUSG00000001741.13	Il16	-0.129992	5.67599	5.67274	0.0260246	0.212418
	ENSMUSG00000001750.17	Tcirg1	-0.0843276	6.38937	2.70161	0.114049	0.421274
	ENSMUSG00000001751.10	Naglu	-0.0509665	4.89049	1.05488	0.315223	0.648113
	ENSMUSG00000001755.13	Coasy	-0.112515	4.71923	6.04579	0.022015	0.196752
	ENSMUSG00000001761.8	Smo	0.000484451	5.70619	8.22631e-05	0.992843	0.998068
	ENSMUSG00000001763.15	Tspan33	-0.090068	1.77183	0.810636	0.3774	0.701577
	ENSMUSG00000001767.6	Crnkl1	0.0832612	4.79153	6.35191	0.0192359	0.184646
	ENSMUSG00000001768.17	Rin2	0.0113357	7.68315	0.130717	0.721038	0.896528
	ENSMUSG00000001774.9	Chordc1	0.114853	4.99494	2.79259	0.108454	0.411498
	ENSMUSG00000001783.4	Rtcb	-0.00288392	6.83118	0.00637285	0.937073	0.980419
	ENSMUSG00000001785.14	Pwp1	-0.0873724	4.48852	3.23426	0.0854464	0.366927
	ENSMUSG00000001786.15	Fbxo7	-0.0393764	4.65074	1.04514	0.317419	0.650183
	ENSMUSG00000001794.14	Capns1	0.078768	7.95491	3.56757	0.0717823	0.338668
	ENSMUSG00000001802.17	Lrp3	0.0109689	4.19493	0.0355272	0.852173	0.950359
	ENSMUSG00000001829.18	Clpb	-0.105873	4.70759	3.32008	0.0816616	0.36013
	ENSMUSG00000001833.18	Septin7	0.0820568	7.14232	2.01862	0.168993	0.498265
	ENSMUSG00000001844.11	Zdhhc4	0.0527075	5.10517	2.05796	0.165067	0.49334
	ENSMUSG00000001847.15	Rac1	0.0981007	8.64749	6.97496	0.0147056	0.164551
	ENSMUSG00000001855.16	Nup214	-0.0569017	6.05106	3.38196	0.0790525	0.355158
	ENSMUSG00000001864.14	Aif1l	-0.0567242	2.54644	0.210486	0.650756	0.862133
	ENSMUSG00000001865.3	Cpa3	-0.089033	-0.277455	0.0602226	0.808353	0.93172
	ENSMUSG00000001870.17	Ltbp1	0.0755317	6.73007	2.52112	0.126185	0.439163
	ENSMUSG00000001891.17	Ugp2	0.0781601	6.07414	2.1102	0.160025	0.486245
	ENSMUSG00000001909.17	Trmt1	-0.0588216	5.2376	2.29109	0.143939	0.464207
	ENSMUSG00000001910.6	Nacc1	0.0054765	6.63608	0.0249168	0.875972	0.959585
	ENSMUSG00000001911.17	Nfix	0.0217258	7.52613	0.191181	0.666074	0.87114
	ENSMUSG00000001918.18	Slc1a5	-0.0699531	7.57933	1.83728	0.188624	0.523926
	ENSMUSG00000001924.16	Uba1	0.0309484	7.90746	0.96269	0.336868	0.668276
	ENSMUSG00000001930.18	Vwf	-0.0860688	9.43451	1.12904	0.299172	0.633343
	ENSMUSG00000001942.9	Siae	0.0161288	4.93969	0.131385	0.720358	0.896266
	ENSMUSG00000001943.9	Vsig2	0.128357	4.63706	3.38823	0.0787932	0.354754
	ENSMUSG00000001946.15	Esam	0.0487193	7.99777	0.971946	0.334604	0.665972
	ENSMUSG00000001948.11	Spa17	-0.124204	3.29011	1.10345	0.304582	0.63831
	ENSMUSG00000001962.9	Fam50a	0.0521892	4.94827	1.55964	0.224464	0.566465
	ENSMUSG00000001964.15	Emd	0.0266747	5.49532	0.475679	0.497388	0.782644
	ENSMUSG00000001983.8	Taco1	-0.0122704	3.03391	0.0390839	0.845045	0.947974
	ENSMUSG00000001986.17	Gria3	0.0424222	4.17052	0.23976	0.629085	0.852381
	ENSMUSG00000001995.10	Sipa1l2	0.0811229	6.83612	2.93919	0.100099	0.396449
	ENSMUSG00000001998.16	Ap4e1	-0.125184	3.75683	5.14603	0.0331486	0.237763
	ENSMUSG00000001999.16	Blvra	-0.0657511	4.23029	1.42257	0.245318	0.585659
	ENSMUSG00000002006.13	Pdzd4	-0.110098	2.98815	2.77767	0.109349	0.412781
	ENSMUSG00000002007.6	Srpk3	-0.308156	2.74579	4.50985	0.0448393	0.269815
	ENSMUSG00000002010.18	Idh3g	-0.0156638	6.3173	0.125347	0.726579	0.899349
	ENSMUSG00000002012.14	Pnck	-0.139265	1.74702	1.1832	0.288137	0.624071
	ENSMUSG00000002014.13	Ssr4	-0.0203724	5.68651	0.26261	0.613291	0.845437
	ENSMUSG00000002015.6	Bcap31	0.0559342	6.69779	2.19365	0.15235	0.47683
	ENSMUSG00000002017.11	Fam98a	0.0745732	5.05563	2.31626	0.141858	0.461265
	ENSMUSG00000002020.16	Ltbp2	0.0485866	7.19668	0.587006	0.451486	0.754733
	ENSMUSG00000002028.14	Kmt2a	-0.0835175	6.90293	5.98713	0.0225972	0.19964
	ENSMUSG00000002031.14	Ift46	-0.0496098	5.28705	1.25722	0.273918	0.611297
	ENSMUSG00000002032.18	Tmem25	-0.186323	1.47367	3.1059	0.0914917	0.378887
	ENSMUSG00000002033.15	Cd3g	-0.376699	2.66677	7.36256	0.0124915	0.153287
	ENSMUSG00000002043.18	Trappc6a	-0.064085	4.06115	1.24915	0.275423	0.612011
	ENSMUSG00000002052.7	Supt6	-0.0452697	7.13201	1.79191	0.193967	0.531012
	ENSMUSG00000002055.10	Spag5	-0.129633	1.70321	0.3278	0.572594	0.826445
	ENSMUSG00000002058.14	Unc119	-0.16153	4.70737	7.63788	0.0111433	0.144678
	ENSMUSG00000002059.19	Rab34	0.0666048	4.86166	2.14942	0.156361	0.483135
	ENSMUSG00000002064.11	Sdf2	0.11166	5.41254	6.5845	0.0173848	0.178635
	ENSMUSG00000002068.17	Ccne1	-0.0127898	0.487378	0.00518709	0.943217	0.981815
	ENSMUSG00000002083.14	Bbc3	-0.140321	3.72256	2.32968	0.140763	0.459554
	ENSMUSG00000002100.16	Mybpc3	-0.664157	3.83344	2.94803	0.0996189	0.396023
	ENSMUSG00000002102.16	Psmc3	0.0287954	6.67979	0.401375	0.532722	0.804531
	ENSMUSG00000002103.17	Acp2	-0.0464806	6.31314	1.44481	0.241771	0.582264
	ENSMUSG00000002104.12	Rapsn	-0.132034	0.664894	0.685643	0.416285	0.731422
	ENSMUSG00000002105.16	Slc39a13	0.032011	5.85962	0.537356	0.471045	0.767504
	ENSMUSG00000002107.19	Celf2	-0.0180847	6.38023	0.251703	0.620717	0.84839
	ENSMUSG00000002108.11	Nr1h3	0.0431418	5.51735	0.438069	0.514729	0.79352
	ENSMUSG00000002109.15	Ddb2	-0.102201	4.23738	4.13773	0.0538036	0.293396
	ENSMUSG00000002111.9	Spi1	-0.163388	5.08344	5.80707	0.0244938	0.206049
	ENSMUSG00000002129.12	Sf3a1	-0.0193499	5.96059	0.405457	0.530664	0.803086
	ENSMUSG00000002147.19	Stat6	0.0273392	7.50751	0.749198	0.3958	0.715665
	ENSMUSG00000002204.10	Napsa	0.0797488	8.36132	1.32476	0.261738	0.599753
	ENSMUSG00000002205.17	Vrk3	-0.0218937	5.25128	0.205035	0.654992	0.864195
	ENSMUSG00000002210.12	Smg9	-0.0381085	4.50318	0.935511	0.343643	0.673847
	ENSMUSG00000002221.12	Paxip1	-0.112828	5.19719	9.98995	0.00442242	0.0975247
	ENSMUSG00000002222.15	Rmnd5a	0.0419624	6.71148	0.800246	0.380422	0.703668
	ENSMUSG00000002227.16	Mov10	0.0574251	4.90932	1.3687	0.254191	0.593473
	ENSMUSG00000002228.8	Ppm1j	-0.0528005	1.93378	0.292408	0.593957	0.835774
	ENSMUSG00000002233.14	Rhoc	0.0669209	6.47141	1.4504	0.24089	0.581578
	ENSMUSG00000002249.22	Tead3	0.140252	5.22984	7.34476	0.0125846	0.153647
	ENSMUSG00000002250.17	Ppard	-0.0715226	5.35261	4.51393	0.0447508	0.269568
	ENSMUSG00000002257.9	Def6	-0.226407	3.76459	12.0656	0.00208866	0.0716085
	ENSMUSG00000002265.18	Peg3	-0.134304	4.41489	1.1329	0.298367	0.632988
	ENSMUSG00000002274.14	Metrn	-0.0904956	3.31179	2.06378	0.164497	0.492561
	ENSMUSG00000002279.20	Lmf1	0.0118987	4.06029	0.0541432	0.818093	0.935705
	ENSMUSG00000002280.12	Ciao3	-0.0829082	4.57073	3.84961	0.0621516	0.316246
	ENSMUSG00000002289.17	Angptl4	0.0398975	5.65654	0.0324919	0.858554	0.952927
	ENSMUSG00000002297.17	Dbf4	-0.01765	2.53442	0.0353912	0.852452	0.950376
	ENSMUSG00000002307.17	Daxx	0.0449284	5.25508	1.43067	0.244019	0.584463
	ENSMUSG00000002308.17	Cd320	0.0374313	2.81297	0.233107	0.63386	0.854539
	ENSMUSG00000002319.17	Ipo4	-0.0279033	5.08393	0.571667	0.457384	0.759155
	ENSMUSG00000002320.16	Tm9sf1	0.0329596	6.42645	0.967774	0.335622	0.666849
	ENSMUSG00000002324.9	Rec8	-0.233876	3.34315	3.974	0.0583789	0.306227
	ENSMUSG00000002325.16	Irf9	0.00468034	6.2495	0.00578554	0.940037	0.981134
	ENSMUSG00000002326.7	Gmpr2	0.0772134	4.17975	1.91535	0.179848	0.513152
	ENSMUSG00000002329.8	Mdp1	-0.0416171	5.13727	0.83003	0.371852	0.696909
	ENSMUSG00000002332.17	Dhrs1	0.0222692	5.64073	0.192969	0.664616	0.87032
	ENSMUSG00000002342.18	Tmem161a	0.012361	5.15317	0.0675052	0.79735	0.927341
	ENSMUSG00000002343.12	Armc6	0.00573251	2.90144	0.00543993	0.941852	0.981624
	ENSMUSG00000002345.19	Borcs8	0.0685519	4.00783	1.73937	0.20039	0.538653
	ENSMUSG00000002346.17	Slc25a42	-0.0381551	5.1183	0.161204	0.691811	0.882628
	ENSMUSG00000002365.11	Snx9	0.00798234	6.12265	0.0554857	0.815894	0.934733
	ENSMUSG00000002372.10	Ranbp3	-0.0616204	6.04384	4.01089	0.0573106	0.302716
	ENSMUSG00000002379.8	Ndufa11	-0.0246119	4.77911	0.204343	0.655534	0.86438
	ENSMUSG00000002393.15	Nr2f6	0.0640184	5.27595	0.864342	0.362323	0.689408
	ENSMUSG00000002395.15	Use1	0.00224031	6.06845	0.00217584	0.963204	0.989556
	ENSMUSG00000002396.9	Ocel1	0.168452	5.24621	8.87356	0.00678332	0.117841
	ENSMUSG00000002409.19	Dyrk1b	-0.0457885	4.68084	0.450756	0.508762	0.78941
	ENSMUSG00000002413.16	Braf	0.0110094	6.05482	0.0555482	0.815792	0.934733
	ENSMUSG00000002416.14	Ndufb2	0.0800365	4.79874	2.56106	0.123373	0.43473
	ENSMUSG00000002428.13	Hltf	-0.0204747	5.16657	0.172831	0.681518	0.877225
	ENSMUSG00000002455.15	Prpf6	0.00308748	6.14271	0.00569588	0.940502	0.981282
	ENSMUSG00000002458.14	Rgs19	0.00693343	4.53051	0.0275796	0.869574	0.957498
	ENSMUSG00000002475.17	Abhd3	-0.0316301	2.81203	0.103541	0.75057	0.909851
	ENSMUSG00000002477.6	Snrpd1	-0.0590217	4.20599	1.51192	0.231458	0.572062
	ENSMUSG00000002486.16	Tchp	-0.156341	4.29296	12.2689	0.0019462	0.0698876
	ENSMUSG00000002489.17	Tiam1	-0.0607328	5.18024	0.818346	0.37518	0.699798
	ENSMUSG00000002496.11	Tsc2	0.0344676	7.29507	1.11472	0.302184	0.636606
	ENSMUSG00000002500.16	Rpl3l	0.0963877	-0.243137	0.0361336	0.850932	0.949889
	ENSMUSG00000002504.16	Slc9a3r2	0.0908763	8.60477	1.57114	0.222817	0.564948
	ENSMUSG00000002524.18	Puf60	0.0114698	6.85327	0.109668	0.743565	0.907196
	ENSMUSG00000002546.18	Golga2	-0.0120925	7.00451	0.129698	0.722079	0.896846
	ENSMUSG00000002550.17	Uck1	-0.0552436	5.47064	1.58535	0.220805	0.562591
	ENSMUSG00000002565.17	Scin	-0.595096	-0.182141	6.09718	0.0215188	0.194934
	ENSMUSG00000002578.19	Ikzf4	-0.03113	3.14412	0.116287	0.736238	0.903852
	ENSMUSG00000002580.8	Mien1	0.0337254	4.68648	0.321917	0.576035	0.828614
	ENSMUSG00000002588.14	Pon1	-0.400211	5.84361	3.85376	0.0620213	0.316048
	ENSMUSG00000002602.17	Axl	0.0157463	7.37532	0.0928516	0.763363	0.914625
	ENSMUSG00000002603.16	Tgfb1	0.00107026	6.01412	0.000578619	0.98102	0.996119
	ENSMUSG00000002608.9	Ccdc97	-0.00260451	5.79279	0.00650335	0.936433	0.980289
	ENSMUSG00000002617.15	Zfp40	0.0933058	3.45216	0.317948	0.578381	0.829282
	ENSMUSG00000002625.11	Akap8l	-0.0155394	7.16816	0.147643	0.704379	0.888611
	ENSMUSG00000002633.5	Shh	-0.375568	3.45644	7.02712	0.0143837	0.163594
	ENSMUSG00000002635.12	Pdcd2l	-0.00631447	3.41556	0.00969816	0.922418	0.97532
	ENSMUSG00000002658.10	Gtf2f1	-0.00662188	5.12216	0.0195267	0.890101	0.965083
	ENSMUSG00000002660.9	Clpp	-0.0107968	4.28128	0.0309516	0.861911	0.954332
	ENSMUSG00000002661.15	Alkbh7	-0.202402	2.89804	6.59574	0.0173004	0.178502
	ENSMUSG00000002668.9	Dennd1c	-0.219615	4.71618	6.26802	0.0199565	0.188767
	ENSMUSG00000002679.15	Med6	0.0745035	3.89949	1.99452	0.171453	0.501882
	ENSMUSG00000002688.9	Prkd1	0.0423012	4.65036	0.658651	0.425478	0.736225
	ENSMUSG00000002699.14	Lcp2	-0.138077	4.27439	2.84898	0.105147	0.404477
	ENSMUSG00000002718.15	Cse1l	0.032484	5.37581	0.408972	0.528903	0.801905
	ENSMUSG00000002728.15	Naa20	0.08809	4.78628	2.67428	0.115795	0.423532
	ENSMUSG00000002731.7	Prkra	0.0476679	3.96494	1.0356	0.319588	0.651611
	ENSMUSG00000002732.15	Fkbp7	0.142458	4.40498	4.9382	0.0365413	0.248155
	ENSMUSG00000002733.9	Plekha3	0.130072	5.39724	10.1578	0.00415345	0.0952572
	ENSMUSG00000002741.10	Ykt6	0.0754362	6.57557	6.99129	0.0146039	0.164292
	ENSMUSG00000002748.8	Baz1b	-0.0796743	7.17989	5.02022	0.0351578	0.243782
	ENSMUSG00000002763.17	Pex6	-0.0179557	5.75712	0.0851366	0.773107	0.918443
	ENSMUSG00000002767.14	Mrpl2	-0.0970494	4.27998	3.25732	0.0844097	0.364983
	ENSMUSG00000002768.9	Mea1	0.0450403	5.23998	0.659681	0.425122	0.736051
	ENSMUSG00000002769.10	Gnmt	-0.0665656	2.11417	0.75698	0.393397	0.713521
	ENSMUSG00000002771.13	Grin2d	-0.0456423	2.59495	0.275395	0.604831	0.84151
	ENSMUSG00000002778.15	Kdelr1	0.0372108	6.80684	1.46415	0.238741	0.579434
	ENSMUSG00000002781.20	Tmem143	-0.119832	3.55093	2.23355	0.148836	0.471384
	ENSMUSG00000002797.10	Ggct	-0.16438	2.86539	4.11279	0.0544735	0.295487
	ENSMUSG00000002799.7	Jag2	0.0754836	5.23414	0.694964	0.413181	0.729076
	ENSMUSG00000002803.15	Btbd6	-0.0156389	4.2858	0.0821317	0.777033	0.920166
	ENSMUSG00000002804.5	Nudt14	-0.0321237	3.93287	0.356901	0.556155	0.817035
	ENSMUSG00000002808.8	Epdr1	0.00409275	4.225	0.00501497	0.944165	0.981914
	ENSMUSG00000002812.5	Flii	-0.012425	7.56953	0.139863	0.711894	0.891872
	ENSMUSG00000002814.16	Top3a	-0.0920363	3.87569	5.68304	0.0259035	0.212415
	ENSMUSG00000002820.7	Atg4d	0.0156695	4.9649	0.2519	0.620581	0.84838
	ENSMUSG00000002825.9	Qtrt1	-0.088829	2.89834	2.3092	0.142439	0.461871
	ENSMUSG00000002831.15	Plin4	-0.189483	4.99534	0.242918	0.626848	0.851196
	ENSMUSG00000002833.12	Hdgfl2	-0.0485321	6.00353	1.50245	0.232879	0.572309
	ENSMUSG00000002835.10	Chaf1a	-0.182955	3.86706	8.1873	0.0089082	0.131443
	ENSMUSG00000002844.10	Adprh	0.0131594	5.59528	0.128975	0.722822	0.897178
	ENSMUSG00000002845.15	Tmem39a	0.0435486	4.61407	1.24703	0.27582	0.612353
	ENSMUSG00000002846.10	Timmdc1	0.101334	3.40145	3.23676	0.0853335	0.366876
	ENSMUSG00000002847.8	Pla1a	-0.168184	-0.0146438	0.30928	0.583572	0.831194
	ENSMUSG00000002870.9	Mcm2	-0.0548068	4.20066	0.530661	0.473789	0.769166
	ENSMUSG00000002871.15	Tpra1	-0.0356192	5.75295	0.659211	0.425284	0.736103
	ENSMUSG00000002881.15	Nab1	0.121764	6.16788	4.17101	0.0529242	0.290913
	ENSMUSG00000002885.15	Adgre5	-0.0283486	9.6347	0.277935	0.60318	0.840939
	ENSMUSG00000002897.6	Il17ra	-0.183771	6.02452	8.73291	0.00716852	0.119805
	ENSMUSG00000002900.18	Lamb1	-0.0483545	7.53165	0.98445	0.331578	0.663042
	ENSMUSG00000002908.18	Kcnn1	-0.189641	0.967378	1.30321	0.265546	0.603778
	ENSMUSG00000002910.12	Arrdc2	0.00139578	4.34175	0.000543575	0.981603	0.996134
	ENSMUSG00000002944.16	Cd36	0.00910518	10.0471	0.0192125	0.890983	0.965421
	ENSMUSG00000002948.20	Map2k7	-0.0454123	6.49298	2.6075	0.120196	0.429732
	ENSMUSG00000002949.16	Timm44	-0.0923452	5.2728	8.49625	0.00787225	0.124232
	ENSMUSG00000002957.12	Ap2a2	-0.000153524	6.93749	1.31016e-05	0.997144	0.999137
	ENSMUSG00000002963.18	Pnkp	-0.0462123	4.88551	1.36704	0.254471	0.593572
	ENSMUSG00000002968.10	Med25	0.0591638	6.05849	3.25577	0.0844789	0.365011
	ENSMUSG00000002980.15	Bcam	0.145202	9.15809	6.62277	0.0170995	0.177783
	ENSMUSG00000002981.11	Clptm1	0.0506772	7.02738	2.53155	0.125443	0.438569
	ENSMUSG00000002983.18	Relb	0.0555317	4.82104	1.11104	0.302964	0.637743
	ENSMUSG00000002984.18	Tomm40	-0.0536239	4.61429	1.32182	0.262253	0.600518
	ENSMUSG00000002985.17	Apoe	-0.158896	9.17364	2.9629	0.0988188	0.394627
	ENSMUSG00000002992.18	Apoc2	-0.244674	1.37715	1.42019	0.245703	0.586004
	ENSMUSG00000002996.18	Hbp1	-0.00877796	6.70384	0.0800199	0.779838	0.920933
	ENSMUSG00000002997.16	Prkar2b	-0.0240416	4.60241	0.0521084	0.821481	0.937628
	ENSMUSG00000003031.15	Cdkn1b	-0.00402936	6.37468	0.00397471	0.950283	0.984675
	ENSMUSG00000003032.9	Klf4	1.02464	7.24201	116.463	2.10887e-10	2.82519e-06
	ENSMUSG00000003033.16	Ap1m1	-0.0577644	5.81105	2.93415	0.100373	0.396753
	ENSMUSG00000003037.17	Rab8a	0.0250316	6.05554	0.597027	0.447698	0.752788
	ENSMUSG00000003038.16	Hmgn2	-0.018423	6.67003	0.0927826	0.763448	0.914626
	ENSMUSG00000003039.10	Fam32a	0.0130601	6.78423	0.0752535	0.786321	0.923788
	ENSMUSG00000003051.14	Elf3	-0.0364735	4.45418	0.153731	0.698657	0.885436
	ENSMUSG00000003062.14	Stard3nl	0.128794	5.49265	8.40342	0.00816882	0.126259
	ENSMUSG00000003068.18	Stk11	-0.00219934	6.88103	0.00247153	0.960785	0.988697
	ENSMUSG00000003070.7	Efna2	-0.189842	1.16348	1.56723	0.223376	0.565113
	ENSMUSG00000003072.16	Atp5d	-0.0148409	6.6012	0.0745237	0.787333	0.923788
	ENSMUSG00000003099.12	Ppp5c	0.00280156	5.96074	0.00592646	0.939312	0.980964
	ENSMUSG00000003119.15	Cdk12	-0.0242653	5.65798	0.19175	0.665609	0.870971
	ENSMUSG00000003123.16	Lipe	-0.239986	6.34589	2.80416	0.107766	0.409701
	ENSMUSG00000003131.8	Pafah1b2	0.0572604	6.43559	1.62146	0.215794	0.557533
	ENSMUSG00000003134.11	Tbc1d8	-0.158032	5.80569	8.52474	0.00778364	0.123791
	ENSMUSG00000003135.16	Cnot11	-0.0282357	4.89109	0.745992	0.396797	0.716125
	ENSMUSG00000003153.11	Slc2a3	-0.0445095	3.91542	0.141775	0.710025	0.891492
	ENSMUSG00000003154.16	Foxj2	0.0462794	6.27096	2.41669	0.133902	0.450088
	ENSMUSG00000003161.16	Sri	0.0802508	6.81658	3.52921	0.0732194	0.341947
	ENSMUSG00000003166.21	Dgcr2	0.026783	6.98058	0.879974	0.358099	0.686199
	ENSMUSG00000003184.16	Irf3	0.0684112	6.36454	3.28403	0.0832275	0.362538
	ENSMUSG00000003190.13	Bcl2l12	-0.0273623	3.86215	0.285199	0.598513	0.838959
	ENSMUSG00000003198.11	Zfp959	0.218985	3.06819	2.53698	0.125059	0.437997
	ENSMUSG00000003199.17	Mpnd	-0.0426952	5.00302	0.665927	0.422969	0.73574
	ENSMUSG00000003200.11	Sh3gl1	0.00862141	5.61709	0.0505476	0.824128	0.938833
	ENSMUSG00000003206.8	Ebi3	-0.18417	1.6037	2.35067	0.13907	0.456752
	ENSMUSG00000003208.10	Yju2	-0.102307	3.63776	2.39461	0.135605	0.45216
	ENSMUSG00000003226.8	Ranbp2	0.0179147	6.70392	0.0803528	0.779393	0.920594
	ENSMUSG00000003227.5	Edar	-0.268089	1.0946	3.2897	0.0829791	0.362417
	ENSMUSG00000003228.10	Grk5	0.0333809	6.97924	0.63683	0.433143	0.742731
	ENSMUSG00000003233.13	Dvl3	0.0475845	5.89099	1.40596	0.24801	0.587521
	ENSMUSG00000003234.17	Abcf3	0.0146963	5.62723	0.281669	0.600772	0.839483
	ENSMUSG00000003235.14	Eif2b5	0.0502064	5.62546	2.05897	0.164969	0.493233
	ENSMUSG00000003269.19	Cyth2	0.153747	5.6565	17.131	0.000408269	0.0323569
	ENSMUSG00000003271.18	Sult2b1	-0.0418444	1.4469	0.0306745	0.862524	0.954536
	ENSMUSG00000003273.15	Car11	-0.490549	1.09359	5.00814	0.0353578	0.244749
	ENSMUSG00000003282.10	Plag1	-0.280983	0.272348	4.26529	0.05052	0.285546
	ENSMUSG00000003283.16	Hck	0.00320517	5.80513	0.00218368	0.963138	0.989556
	ENSMUSG00000003299.11	Mrpl4	0.00805479	5.69728	0.0334578	0.856491	0.952404
	ENSMUSG00000003308.16	Keap1	-0.0891227	6.15347	5.68949	0.025828	0.212389
	ENSMUSG00000003309.15	Ap1m2	0.112179	4.65686	5.22222	0.0319945	0.232795
	ENSMUSG00000003316.15	Glg1	-0.0821446	7.36191	5.19775	0.0323601	0.234186
	ENSMUSG00000003344.16	Btbd2	-0.00925121	5.56234	0.0476593	0.829141	0.940718
	ENSMUSG00000003345.17	Csnk1g2	0.0292687	7.01394	0.485928	0.492838	0.77971
	ENSMUSG00000003346.15	Abhd17a	0.0420139	5.47834	0.590168	0.450285	0.754099
	ENSMUSG00000003348.11	Mob3a	0.0599187	5.54877	1.61986	0.216013	0.557853
	ENSMUSG00000003352.15	Cacnb3	-0.0254391	4.73532	0.232735	0.63413	0.854656
	ENSMUSG00000003354.7	Ccdc65	-0.11882	3.15248	0.830757	0.371647	0.696748
	ENSMUSG00000003355.8	Fkbp11	-0.0440991	1.98617	0.116648	0.735845	0.903745
	ENSMUSG00000003360.16	Ddx23	-0.0328062	6.66915	1.1631	0.292168	0.627165
	ENSMUSG00000003363.16	Pld3	0.0437384	6.57232	0.804476	0.379187	0.703095
	ENSMUSG00000003378.10	Grik5	-0.121412	4.56413	3.46221	0.0758102	0.347326
	ENSMUSG00000003379.8	Cd79a	-0.441786	5.57782	5.6288	0.0265483	0.214627
	ENSMUSG00000003380.12	Rabac1	0.0531987	7.12947	0.881586	0.357667	0.685972
	ENSMUSG00000003382.19	Etv3	0.0372623	6.21915	1.30677	0.264912	0.603111
	ENSMUSG00000003402.15	Prkcsh	0.0343268	6.08185	0.767097	0.390305	0.711846
	ENSMUSG00000003411.11	Rab3b	-0.382259	-0.371804	1.81246	0.191525	0.52771
	ENSMUSG00000003418.12	St8sia6	-0.144613	2.33164	0.886137	0.356452	0.685446
	ENSMUSG00000003420.9	Fcgrt	-0.0106051	6.63582	0.0354852	0.852259	0.950359
	ENSMUSG00000003421.14	Nosip	0.0288429	5.59242	0.63327	0.434414	0.743719
	ENSMUSG00000003423.16	Pih1d1	0.0786056	4.54788	1.53507	0.228031	0.569207
	ENSMUSG00000003429.12	Rps11	0.0143666	8.20872	0.043724	0.836236	0.943474
	ENSMUSG00000003435.10	Supt5	-0.0442556	7.1477	1.40083	0.248851	0.588123
	ENSMUSG00000003437.15	Paf1	0.0496968	6.22603	2.19922	0.151854	0.475915
	ENSMUSG00000003438.18	Timm50	0.000810632	4.24797	0.000206375	0.988664	0.997399
	ENSMUSG00000003444.9	Med29	0.0148263	3.55917	0.0650327	0.801011	0.928884
	ENSMUSG00000003452.16	Bicd1	0.135816	1.74143	1.46533	0.238557	0.579311
	ENSMUSG00000003458.13	Ncstn	0.0318851	7.0975	1.36369	0.255038	0.594291
	ENSMUSG00000003464.14	Pex19	0.0216849	6.38384	0.524018	0.476539	0.770092
	ENSMUSG00000003469.10	Phyhip	0.0748589	0.734961	0.0518975	0.821836	0.937749
	ENSMUSG00000003476.17	Crhr2	-0.0571833	-0.0328046	0.0167802	0.898074	0.967817
	ENSMUSG00000003477.6	Inmt	0.00110168	11.0099	0.000251847	0.987477	0.997353
	ENSMUSG00000003484.5	Cyp4f18	-0.31939	3.50883	6.45477	0.0183915	0.181929
	ENSMUSG00000003500.14	Impdh1	0.115513	7.43662	4.16998	0.0529511	0.290913
	ENSMUSG00000003518.14	Dusp3	0.242567	7.88369	36.1166	4.21135e-06	0.00167487
	ENSMUSG00000003526.13	Prodh	-0.0433101	4.53229	0.619641	0.439335	0.746826
	ENSMUSG00000003527.10	Ess2	-0.0657045	4.74716	4.19413	0.0523229	0.289838
	ENSMUSG00000003528.16	Slc25a1	-0.00832206	5.87171	0.00618257	0.938018	0.980522
	ENSMUSG00000003531.16	Dgcr6	0.0308695	4.64854	0.442887	0.512449	0.791988
	ENSMUSG00000003534.18	Ddr1	-0.085242	6.53178	4.12998	0.0540107	0.293988
	ENSMUSG00000003541.7	Ier3	-0.10489	7.35245	1.60804	0.21764	0.559385
	ENSMUSG00000003545.4	Fosb	-1.30985	4.69225	3.2508	0.0847013	0.365611
	ENSMUSG00000003546.11	Klc4	0.0785436	5.04219	2.76942	0.109847	0.413736
	ENSMUSG00000003549.10	Ercc1	-0.00964606	4.18548	0.0374333	0.848309	0.948925
	ENSMUSG00000003559.9	As3mt	0.0834618	4.72787	4.4118	0.0470254	0.275734
	ENSMUSG00000003573.16	Homer3	0.0505362	5.61585	0.99335	0.329447	0.6612
	ENSMUSG00000003575.14	Crtc1	-0.0953771	4.9855	7.59793	0.0113286	0.14555
	ENSMUSG00000003581.15	Rnf215	0.0260859	5.88788	0.45902	0.50494	0.787027
	ENSMUSG00000003585.14	Sec14l2	0.00717672	4.13186	0.00948379	0.923277	0.975747
	ENSMUSG00000003604.15	Aven	-0.0149786	3.08067	0.0318403	0.859964	0.953543
	ENSMUSG00000003617.17	Cp	-0.203347	8.2706	6.05875	0.0218887	0.196376
	ENSMUSG00000003623.5	Crot	0.0156075	4.90243	0.0604956	0.807928	0.931598
	ENSMUSG00000003644.18	Rps6ka1	0.0313557	6.48281	0.991206	0.329959	0.661619
	ENSMUSG00000003660.11	Snrnp200	-0.0460899	7.2265	1.89665	0.181904	0.516302
	ENSMUSG00000003662.11	Ciao1	0.0591659	5.35534	2.47239	0.129718	0.444092
	ENSMUSG00000003665.8	Has1	0.845675	0.29203	13.2571	0.00138999	0.0597628
	ENSMUSG00000003680.17	Taf6l	-0.1178	2.49612	2.11571	0.159505	0.485844
	ENSMUSG00000003721.15	Insig2	0.0584905	5.43433	1.24716	0.275796	0.612353
	ENSMUSG00000003731.14	Kpna6	-0.0185029	6.53815	0.339461	0.565892	0.822699
	ENSMUSG00000003746.17	Man1a	-0.130362	5.73609	4.9622	0.0361303	0.246673
	ENSMUSG00000003752.10	Itpkc	0.110366	3.94009	2.02132	0.16872	0.498022
	ENSMUSG00000003762.14	Coq8b	-0.106187	4.94813	5.10661	0.033764	0.239419
	ENSMUSG00000003778.15	Brd8	-0.062925	6.15979	3.62469	0.0697014	0.333709
	ENSMUSG00000003779.17	Kif20a	0.144141	2.28584	0.312738	0.581489	0.830594
	ENSMUSG00000003808.19	Farsa	-0.0247949	4.84472	0.361492	0.553645	0.815325
	ENSMUSG00000003809.15	Gcdh	-0.0463133	4.61863	0.698204	0.41211	0.728089
	ENSMUSG00000003810.15	Mast2	0.094419	5.95449	6.42049	0.0186683	0.183115
	ENSMUSG00000003812.14	Dnase2a	0.0444932	5.00523	1.08521	0.308521	0.641896
	ENSMUSG00000003813.16	Rad23a	0.0269524	5.91602	0.42141	0.522759	0.798303
	ENSMUSG00000003814.9	Calr	0.0962365	8.99665	3.30519	0.0823043	0.361688
	ENSMUSG00000003824.13	Syce2	-0.169022	1.40055	2.47375	0.129618	0.44396
	ENSMUSG00000003847.17	Nfat5	-0.0294619	7.21823	0.197975	0.660581	0.867696
	ENSMUSG00000003848.15	Nob1	0.0551219	4.32902	1.64146	0.213079	0.554012
	ENSMUSG00000003849.9	Nqo1	-1.07296	2.92724	7.60489	0.011296	0.145345
	ENSMUSG00000003863.19	Ppfia3	0.0355043	0.0459197	0.00983921	0.921857	0.975248
	ENSMUSG00000003865.17	Gys1	0.048886	5.31347	0.96635	0.33597	0.66725
	ENSMUSG00000003868.15	Ruvbl2	-0.000312677	5.20843	4.252e-05	0.994854	0.99834
	ENSMUSG00000003873.12	Bax	0.0470272	4.9989	0.698042	0.412164	0.728089
	ENSMUSG00000003882.6	Il7r	-0.196365	3.8162	3.88421	0.0610751	0.313142
	ENSMUSG00000003923.15	Tfam	-0.0869187	4.81105	5.42594	0.0291236	0.223254
	ENSMUSG00000003929.12	Zfp81	0.050837	3.49659	0.376876	0.545393	0.811261
	ENSMUSG00000003934.6	Efnb3	0.0797652	0.831637	0.137434	0.714288	0.892809
	ENSMUSG00000003948.18	Mmd	0.0581425	5.84865	1.22173	0.280617	0.617055
	ENSMUSG00000003949.17	Hlf	-0.0313369	4.90865	0.0495289	0.825878	0.939487
	ENSMUSG00000003955.9	Fam162a	0.0509613	4.47982	0.336366	0.567656	0.82372
	ENSMUSG00000003970.10	Rpl8	-0.00609393	8.60734	0.0136438	0.908042	0.971208
	ENSMUSG00000003992.16	Ssbp2	0.0645322	3.94072	1.29844	0.266398	0.6047
	ENSMUSG00000004018.10	Fancl	0.0308452	2.57311	0.0742832	0.787667	0.923932
	ENSMUSG00000004032.11	Gstm5	-0.0333208	3.0244	0.114496	0.738197	0.904602
	ENSMUSG00000004035.13	Gstm7	-0.0829266	2.55105	0.442845	0.512468	0.791988
	ENSMUSG00000004040.17	Stat3	0.0239404	7.9253	0.731982	0.401196	0.719824
	ENSMUSG00000004043.15	Stat5a	-0.147599	4.70914	8.39716	0.00818927	0.126259
	ENSMUSG00000004044.10	Cavin1	0.0402803	9.40576	0.997554	0.328448	0.660591
	ENSMUSG00000004054.10	Map3k11	0.116141	6.97023	5.06915	0.0343605	0.241501
	ENSMUSG00000004056.16	Akt2	0.0214249	7.18058	0.246787	0.624131	0.850011
	ENSMUSG00000004069.18	Dnaja3	0.0251292	5.43172	0.589752	0.450443	0.754142
	ENSMUSG00000004070.16	Hmox2	0.0188536	5.76925	0.137717	0.714008	0.892809
	ENSMUSG00000004071.14	Cdip1	0.0203388	6.4073	0.416971	0.524937	0.799751
	ENSMUSG00000004085.15	Map3k20	0.0863581	6.47216	6.0198	0.0222709	0.19806
	ENSMUSG00000004096.10	Cwc15	0.0715633	5.72449	2.00608	0.170267	0.500116
	ENSMUSG00000004098.8	Col5a3	-0.268994	3.22414	4.79751	0.0390591	0.255773
	ENSMUSG00000004099.17	Dnmt1	-0.0475647	5.95645	2.29886	0.143293	0.463334
	ENSMUSG00000004100.13	Ppan	-0.0188212	4.34942	0.109831	0.743382	0.907127
	ENSMUSG00000004105.9	Angptl2	0.0551044	7.23325	0.535083	0.471974	0.767928
	ENSMUSG00000004110.18	Cacna1e	-0.500271	1.94482	8.16453	0.0089903	0.13176
	ENSMUSG00000004113.19	Cacna1b	-0.0354918	0.740934	0.0195153	0.890133	0.965083
	ENSMUSG00000004127.13	Trmt10a	0.0228229	2.31269	0.0536089	0.818976	0.936255
	ENSMUSG00000004151.18	Etv1	0.165481	3.93305	3.9547	0.0589468	0.30773
	ENSMUSG00000004187.12	Kifc2	-0.0747543	4.52584	1.31495	0.263462	0.601492
	ENSMUSG00000004207.15	Psap	-0.0847372	10.0998	3.97699	0.0582915	0.305952
	ENSMUSG00000004221.17	Ikbkg	-0.0873223	5.68417	1.947	0.176433	0.507885
	ENSMUSG00000004233.15	Wars2	-0.0728287	3.37241	1.51805	0.230545	0.571431
	ENSMUSG00000004263.16	Atn1	0.108277	6.90082	6.43001	0.0185909	0.183068
	ENSMUSG00000004264.18	Phb2	0.021912	5.99217	0.294916	0.592388	0.835583
	ENSMUSG00000004266.16	Ptpn6	-0.236784	5.95511	9.5183	0.00528659	0.1056
	ENSMUSG00000004267.17	Eno2	0.00122222	2.31781	0.000111673	0.991661	0.997954
	ENSMUSG00000004268.12	Emg1	0.0832074	5.61474	3.9871	0.0579971	0.304955
	ENSMUSG00000004270.14	Lpcat3	0.00480569	5.79407	0.0143301	0.905769	0.970485
	ENSMUSG00000004285.13	Atp6v1f	0.0207222	5.85179	0.104085	0.749939	0.909721
	ENSMUSG00000004296.15	Il12b	-0.129065	0.0730313	0.178414	0.67672	0.874791
	ENSMUSG00000004317.15	Clcn5	0.113994	3.7433	3.93476	0.0595402	0.309719
	ENSMUSG00000004319.16	Clcn3	0.0471758	5.6274	0.842896	0.368237	0.693691
	ENSMUSG00000004328.16	Hif3a	-0.259409	2.0357	2.48285	0.12895	0.443145
	ENSMUSG00000004347.18	Pde1c	0.110295	0.564016	0.240226	0.628754	0.852119
	ENSMUSG00000004356.9	Utp20	-0.00052571	4.27318	0.000112129	0.991644	0.997954
	ENSMUSG00000004359.17	Spic	-0.525133	0.0498973	4.16489	0.0530847	0.291018
	ENSMUSG00000004360.10	9330159F19Rik	0.259428	1.95628	3.80506	0.0635698	0.320522
	ENSMUSG00000004364.15	Cul3	0.0421963	6.47644	0.35082	0.559513	0.819009
	ENSMUSG00000004371.16	Il11	0.0228046	-0.4208	0.015547	0.90187	0.969263
	ENSMUSG00000004383.19	Large1	0.0525389	4.82018	0.953991	0.339016	0.669813
	ENSMUSG00000004393.11	Ddx56	0.018055	4.63584	0.196336	0.661895	0.868613
	ENSMUSG00000004394.13	Tmed4	0.100544	6.44461	15.196	0.000739738	0.0443037
	ENSMUSG00000004415.16	Col26a1	-0.105363	-0.106374	0.290945	0.594876	0.836326
	ENSMUSG00000004446.13	Bid	-0.147777	3.4057	2.67582	0.115696	0.423532
	ENSMUSG00000004451.15	Ralb	0.0319606	6.40788	0.466131	0.501692	0.78523
	ENSMUSG00000004455.17	Ppp1cc	0.056645	7.15245	1.65029	0.211894	0.552771
	ENSMUSG00000004460.18	Dnajb11	0.0281994	6.17176	0.645041	0.430234	0.740281
	ENSMUSG00000004462.8	Tbccd1	0.00897879	4.1042	0.0470261	0.830261	0.94092
	ENSMUSG00000004473.11	Clec11a	-0.208921	2.89865	2.24378	0.147952	0.469827
	ENSMUSG00000004500.10	Zfp324	0.018517	3.81489	0.150688	0.701501	0.88668
	ENSMUSG00000004508.7	Gab2	0.0131498	6.20169	0.0649629	0.801116	0.928884
	ENSMUSG00000004530.13	Coro1c	0.0641895	7.36706	3.52445	0.0734004	0.342272
	ENSMUSG00000004535.13	Tax1bp1	0.0178233	7.70132	0.184021	0.67199	0.872793
	ENSMUSG00000004540.8	Psg17	0.292854	-0.341975	1.75034	0.199027	0.536803
	ENSMUSG00000004552.17	Ctse	-0.350344	0.845407	2.39429	0.13563	0.45216
	ENSMUSG00000004558.16	Ndrg2	0.000381064	6.72356	1.86996e-05	0.996588	0.998814
	ENSMUSG00000004561.15	Mettl17	-0.101363	4.19053	4.16284	0.0531386	0.291222
	ENSMUSG00000004562.17	Arhgef40	0.0768819	5.94976	3.39422	0.0785469	0.35458
	ENSMUSG00000004565.16	Pnpla6	-0.00540576	5.87746	0.0248297	0.876188	0.959585
	ENSMUSG00000004567.17	Mcoln1	-0.06606	5.89438	3.41348	0.0777604	0.352211
	ENSMUSG00000004568.14	Arhgef18	-0.00886359	7.14553	0.0740575	0.787982	0.924003
	ENSMUSG00000004591.17	Pkn2	0.0193167	5.96228	0.146789	0.705193	0.889189
	ENSMUSG00000004609.12	Cd33	-0.0567342	4.03967	0.4235	0.521739	0.797702
	ENSMUSG00000004610.5	Etfb	-0.00584874	5.98775	0.00903122	0.925124	0.976502
	ENSMUSG00000004612.10	Nkg7	-0.0140215	2.94068	0.0160897	0.900182	0.968782
	ENSMUSG00000004626.15	Stxbp2	-0.0403645	6.15168	1.39027	0.25059	0.589705
	ENSMUSG00000004631.16	Sgce	0.0556003	5.93364	2.96187	0.098874	0.394656
	ENSMUSG00000004633.18	Chn2	-0.134218	3.41991	2.65409	0.117105	0.426484
	ENSMUSG00000004637.16	Wwox	-0.0243249	3.61272	0.179776	0.675563	0.874297
	ENSMUSG00000004642.14	Slbp	0.124629	4.58987	4.37047	0.0479826	0.27886
	ENSMUSG00000004655.6	Aqp1	0.195428	10.028	10.636	0.00348067	0.0893082
	ENSMUSG00000004661.16	Arid3b	0.0383964	5.12643	0.893327	0.354545	0.683732
	ENSMUSG00000004665.11	Cnn2	0.218754	8.58157	12.9653	0.00153351	0.0623674
	ENSMUSG00000004667.19	Polr2e	0.00716257	5.8399	0.0284704	0.867505	0.956792
	ENSMUSG00000004677.19	Myo9b	-0.0342595	6.86272	1.47927	0.236404	0.576172
	ENSMUSG00000004698.12	Hdac9	0.100099	3.32063	1.57862	0.221756	0.563619
	ENSMUSG00000004707.15	Ly9	-0.287529	3.44596	7.53575	0.0116237	0.147227
	ENSMUSG00000004709.15	Cd244a	-0.104899	3.12743	0.974121	0.334075	0.66533
	ENSMUSG00000004730.16	Adgre1	0.0146625	4.65107	0.106033	0.747694	0.908374
	ENSMUSG00000004748.6	Mtfp1	-0.223673	2.07405	4.50844	0.04487	0.269815
	ENSMUSG00000004768.15	Rab23	-0.0371919	4.74607	0.424334	0.521333	0.797657
	ENSMUSG00000004771.13	Rab11a	0.122582	6.43827	5.37442	0.0298215	0.225614
	ENSMUSG00000004788.12	Eif2b2	0.0334623	4.95103	0.814896	0.376171	0.700982
	ENSMUSG00000004789.11	Dlst	0.0184438	6.91809	0.40767	0.529554	0.802227
	ENSMUSG00000004791.8	Pgf	-0.0616206	2.42914	0.25925	0.615557	0.846627
	ENSMUSG00000004798.15	Ulk2	0.0872667	6.08328	3.0782	0.0928606	0.381607
	ENSMUSG00000004814.11	Ccl24	-0.185568	-0.0475397	0.492852	0.489805	0.777777
	ENSMUSG00000004815.13	Dgkq	-0.0964735	5.08386	4.48723	0.0453333	0.271168
	ENSMUSG00000004837.3	Grap	0.0659897	6.71212	1.20105	0.284621	0.621021
	ENSMUSG00000004843.8	Chmp2b	0.0703276	5.66251	2.38937	0.136013	0.452918
	ENSMUSG00000004846.11	Plod3	0.0708491	6.34155	1.75522	0.198425	0.535838
	ENSMUSG00000004849.15	Ap1s1	0.0281985	5.41014	0.349386	0.56031	0.819531
	ENSMUSG00000004864.14	Mapk13	-0.207149	3.38986	3.71533	0.0665395	0.326337
	ENSMUSG00000004865.17	Srpk1	-0.0105866	5.9853	0.0597143	0.809147	0.932205
	ENSMUSG00000004880.12	Lbr	-0.00647592	6.08027	0.0370562	0.849065	0.948925
	ENSMUSG00000004891.17	Nes	0.317751	7.68738	29.9497	1.5292e-05	0.00411685
	ENSMUSG00000004892.14	Bcan	0.0840774	3.25762	0.507159	0.483638	0.77452
	ENSMUSG00000004895.10	Prcc	0.0261452	5.15762	0.333642	0.569217	0.824068
	ENSMUSG00000004896.17	Rrnad1	0.107063	5.36262	10.6484	0.00346489	0.0891212
	ENSMUSG00000004897.17	Hdgf	0.0362991	7.35961	0.974527	0.333976	0.66533
	ENSMUSG00000004902.8	Slc25a18	-0.43028	0.594942	4.83363	0.0383946	0.25411
	ENSMUSG00000004929.13	Thop1	-0.0337193	4.23471	0.0876386	0.769896	0.916947
	ENSMUSG00000004931.12	Apba3	0.0528192	4.74877	0.66655	0.422755	0.735662
	ENSMUSG00000004933.18	Matk	-0.383639	1.60828	8.75011	0.00712016	0.119587
	ENSMUSG00000004934.15	Pias4	-0.00426241	4.48434	0.0102594	0.920212	0.974421
	ENSMUSG00000004936.9	Map2k1	-0.0455106	6.05525	1.53322	0.228302	0.569555
	ENSMUSG00000004937.7	Sgta	0.00607134	6.17363	0.0291128	0.866033	0.955892
	ENSMUSG00000004945.16	Tmem242	0.020519	5.09524	0.090634	0.766117	0.915573
	ENSMUSG00000004947.16	Dtx2	0.101233	4.31186	3.24317	0.0850443	0.366459
	ENSMUSG00000004951.11	Hspb1	0.284218	6.67063	4.9789	0.0358473	0.246088
	ENSMUSG00000004952.14	Rasa4	-0.0570907	4.7843	0.960123	0.3375	0.668922
	ENSMUSG00000004961.8	Syt5	-0.256689	3.75378	4.83258	0.0384138	0.254141
	ENSMUSG00000004980.17	Hnrnpa2b1	0.0634639	8.89302	3.97314	0.0584041	0.306267
	ENSMUSG00000004994.13	Ccdc130	0.0143974	3.65277	0.0543826	0.817699	0.935504
	ENSMUSG00000004996.10	Mri1	-0.0597644	4.24334	1.19848	0.285123	0.621806
	ENSMUSG00000005034.16	Prkacb	0.0203106	6.7025	0.333787	0.569134	0.824068
	ENSMUSG00000005043.14	Sgsh	-0.0504779	5.73788	1.45118	0.240767	0.58137
	ENSMUSG00000005045.17	Chd5	0.102124	2.06189	1.3576	0.256071	0.595554
	ENSMUSG00000005054.8	Cstb	0.0170929	5.18602	0.0497071	0.825571	0.939487
	ENSMUSG00000005057.14	Sh2b2	-0.190233	2.46155	5.56874	0.0272832	0.217367
	ENSMUSG00000005069.13	Pex5	0.0178467	5.27225	0.372072	0.547945	0.81279
	ENSMUSG00000005078.17	Jkamp	0.074107	4.73337	3.10547	0.0915131	0.378887
	ENSMUSG00000005087.18	Cd44	0.0641459	7.03995	1.37054	0.253881	0.593038
	ENSMUSG00000005089.16	Slc1a2	0.268205	2.17832	3.2425	0.0850741	0.366497
	ENSMUSG00000005102.14	Eif2ak4	0.016975	4.55976	0.162395	0.690737	0.88208
	ENSMUSG00000005103.13	Wdr1	0.124351	7.47015	11.9692	0.00216015	0.0721382
	ENSMUSG00000005107.14	Slc2a9	0.0167096	3.48618	0.0482854	0.828041	0.940573
	ENSMUSG00000005124.11	Ccn4	-0.144726	2.78277	1.09918	0.305498	0.63865
	ENSMUSG00000005125.14	Ndrg1	0.0763371	5.456	1.22589	0.279821	0.615846
	ENSMUSG00000005131.5	4930550C14Rik	0.0732556	1.30274	0.318345	0.578145	0.829123
	ENSMUSG00000005142.11	Man2b1	-0.0418712	7.08337	1.29048	0.267829	0.606264
	ENSMUSG00000005148.9	Klf5	0.259769	5.45252	21.1268	0.000131506	0.0169749
	ENSMUSG00000005150.17	Wdr83	-0.0648991	4.2078	1.50916	0.231871	0.572125
	ENSMUSG00000005161.16	Prdx2	0.0352417	6.64201	0.425021	0.520999	0.797568
	ENSMUSG00000005198.16	Polr2a	-0.133074	8.2085	16.9412	0.000432158	0.0330149
	ENSMUSG00000005204.13	Senp3	0.0161204	6.17939	0.199942	0.659012	0.866615
	ENSMUSG00000005220.11	Corin	-0.393317	2.12864	1.69655	0.20582	0.545681
	ENSMUSG00000005225.16	Plekha8	0.146727	3.94851	6.12392	0.0212655	0.194218
	ENSMUSG00000005233.17	Spc25	-0.0266601	1.83945	0.0429722	0.837629	0.944011
	ENSMUSG00000005237.15	Dnah2	-0.12911	4.20959	2.42269	0.133444	0.449584
	ENSMUSG00000005251.16	Ripk4	0.126868	4.93963	4.43534	0.0464898	0.274418
	ENSMUSG00000005262.14	Ufd1	0.0265491	5.67332	0.670744	0.421321	0.734698
	ENSMUSG00000005267.14	Zfp287	-0.0452486	3.34597	0.450615	0.508827	0.78941
	ENSMUSG00000005268.21	Prlr	-0.310649	-0.491912	1.73758	0.200613	0.538755
	ENSMUSG00000005299.7	Letm1	-0.0401349	5.80621	1.49283	0.234333	0.574314
	ENSMUSG00000005312.16	Ubqln1	0.0499539	6.7961	2.34542	0.139491	0.456901
	ENSMUSG00000005320.10	Fgfr4	0.215947	5.53786	10.606	0.00351913	0.0898527
	ENSMUSG00000005338.15	Cadm3	-0.183497	1.29464	0.763595	0.391371	0.712283
	ENSMUSG00000005354.17	Txn2	0.0566964	6.20199	2.20144	0.151656	0.475835
	ENSMUSG00000005360.15	Slc1a3	0.0337005	5.6428	0.73187	0.401231	0.719824
	ENSMUSG00000005362.15	Crbn	0.0460421	4.9304	0.891079	0.35514	0.684427
	ENSMUSG00000005364.12	Il5ra	-0.783109	0.583961	10.1422	0.00417756	0.0955596
	ENSMUSG00000005370.5	Msh6	-0.0162604	4.78877	0.095046	0.760673	0.913591
	ENSMUSG00000005371.16	Fbxo11	0.0768686	6.34033	0.979246	0.332832	0.664412
	ENSMUSG00000005373.14	Mlxipl	-0.166365	3.11306	0.766485	0.390491	0.711846
	ENSMUSG00000005374.14	Tbl2	0.0886291	4.84166	5.89494	0.023547	0.204299
	ENSMUSG00000005378.18	Bud23	-0.081811	4.4207	2.92862	0.100675	0.39736
	ENSMUSG00000005397.9	Nid1	-0.023768	7.53785	0.157649	0.695045	0.884032
	ENSMUSG00000005410.7	Mcm5	-0.0200552	3.69905	0.0574337	0.812753	0.933533
	ENSMUSG00000005413.9	Hmox1	-0.331508	5.18527	8.68981	0.00729136	0.120214
	ENSMUSG00000005417.18	Mprip	0.0279078	9.50098	0.802638	0.379723	0.703199
	ENSMUSG00000005442.14	Cic	-0.0247301	7.50015	0.362793	0.552938	0.815136
	ENSMUSG00000005447.13	Pafah1b3	-0.00122296	3.48017	0.000273857	0.986942	0.997353
	ENSMUSG00000005465.10	Il27ra	-0.247357	3.34263	4.68134	0.0412859	0.261681
	ENSMUSG00000005469.11	Prkaca	0.065545	6.46588	2.06078	0.164791	0.493149
	ENSMUSG00000005470.9	Asf1b	-0.00851485	1.71989	0.00267525	0.959203	0.988022
	ENSMUSG00000005481.19	Ddx39a	-0.0685935	5.84468	2.54818	0.124272	0.437291
	ENSMUSG00000005483.11	Dnajb1	0.484163	5.54115	22.0292	0.00010341	0.0147119
	ENSMUSG00000005501.15	Usp40	-0.0952949	5.22436	5.85943	0.0239246	0.205099
	ENSMUSG00000005505.13	Kbtbd4	0.0295107	4.39528	0.383468	0.541928	0.809354
	ENSMUSG00000005506.17	Celf1	-0.072616	6.78071	3.40344	0.0781691	0.353366
	ENSMUSG00000005510.10	Ndufs3	0.00526531	5.52576	0.0137883	0.907559	0.971208
	ENSMUSG00000005514.15	Por	-0.0883907	8.20748	2.82775	0.106378	0.407778
	ENSMUSG00000005533.11	Igf1r	0.0338887	6.93423	0.902507	0.352131	0.681281
	ENSMUSG00000005534.11	Insr	-0.00779898	6.37639	0.026573	0.871954	0.958557
	ENSMUSG00000005540.11	Fcer2a	-0.54825	4.62397	11.0509	0.00299331	0.0832749
	ENSMUSG00000005547.15	Cyp2a5	-0.292172	5.73193	0.690734	0.414585	0.730228
	ENSMUSG00000005566.15	Trim28	0.0733935	6.59869	6.16277	0.0209035	0.19291
	ENSMUSG00000005575.17	Ube2m	0.0525722	5.65938	2.49779	0.127862	0.441659
	ENSMUSG00000005580.12	Adcy9	-0.0499435	5.11745	0.696011	0.412835	0.728731
	ENSMUSG00000005583.17	Mef2c	-0.099404	5.28754	2.00702	0.170172	0.500116
	ENSMUSG00000005609.17	Ctr9	0.0327145	5.59802	1.4064	0.24794	0.587501
	ENSMUSG00000005610.18	Eif4g2	0.133438	9.2081	11.191	0.00284606	0.0814094
	ENSMUSG00000005611.16	Irag1	-0.110359	3.50573	0.748428	0.396039	0.715665
	ENSMUSG00000005615.16	Pcyt1a	0.0370864	7.0195	1.66163	0.210385	0.550688
	ENSMUSG00000005621.12	Zfp592	0.0296841	6.49295	1.01783	0.323685	0.655348
	ENSMUSG00000005625.16	Psmd4	0.00516781	6.34799	0.0280995	0.868362	0.957074
	ENSMUSG00000005628.13	Tmod4	-0.355575	0.201116	3.29941	0.0825552	0.361882
	ENSMUSG00000005656.10	Snx6	0.0657126	5.52534	1.86113	0.185889	0.520786
	ENSMUSG00000005667.9	Mthfd2	-0.0988563	2.43942	0.862973	0.362697	0.689408
	ENSMUSG00000005672.13	Kit	-0.0165366	7.78947	0.0804986	0.779199	0.920533
	ENSMUSG00000005674.10	Tomm40l	-0.00259038	4.89054	0.00202683	0.964485	0.989884
	ENSMUSG00000005677.15	Nr1i3	-0.0352432	1.36822	0.0668116	0.79837	0.927606
	ENSMUSG00000005682.10	Pan2	-0.0600944	6.11577	4.32981	0.0489461	0.281561
	ENSMUSG00000005683.9	Cs	-0.0250803	7.4075	0.25354	0.619452	0.84788
	ENSMUSG00000005686.18	Ampd3	-0.0244034	5.43471	0.293338	0.593374	0.835774
	ENSMUSG00000005687.15	Bcas2	0.0488789	5.44195	1.90536	0.180943	0.515137
	ENSMUSG00000005696.12	Sh2d1a	-0.111381	-0.184221	0.248496	0.622939	0.849638
	ENSMUSG00000005698.16	Ctcf	-0.0147781	6.55345	0.332197	0.570048	0.824199
	ENSMUSG00000005699.17	Pard6a	0.00933356	2.49455	0.0195695	0.889982	0.965083
	ENSMUSG00000005705.11	Agrp	-0.116913	-0.0112339	0.389625	0.538729	0.807613
	ENSMUSG00000005718.9	Tfap4	-0.541929	2.75214	33.8414	6.66176e-06	0.00228577
	ENSMUSG00000005732.15	Ranbp1	0.0706815	5.01897	2.42449	0.133307	0.449452
	ENSMUSG00000005763.16	Cd247	-0.182456	3.70368	5.21143	0.0321552	0.233285
	ENSMUSG00000005774.13	Rfx5	-0.102207	5.33957	5.84473	0.0240829	0.205604
	ENSMUSG00000005779.13	Psmb4	0.0559713	6.26935	1.55596	0.224993	0.566465
	ENSMUSG00000005800.4	Mmp8	0.0342227	1.92567	0.0596374	0.809267	0.932236
	ENSMUSG00000005802.13	Slc30a4	0.0764137	4.65572	0.64077	0.431743	0.741712
	ENSMUSG00000005803.15	Sqor	-0.00261166	5.94734	0.00342728	0.953829	0.986066
	ENSMUSG00000005804.15	Bloc1s6	0.00985408	4.84936	0.0634718	0.803361	0.930255
	ENSMUSG00000005813.13	Metap1	-0.00229208	4.98863	0.00393956	0.950503	0.984775
	ENSMUSG00000005823.10	Gpr108	0.0129388	5.84925	0.133606	0.718112	0.895031
	ENSMUSG00000005824.8	Tnfsf14	-0.29438	1.35357	4.33699	0.0487743	0.281434
	ENSMUSG00000005836.11	Gata6	-0.0663821	5.48124	2.41002	0.134414	0.450946
	ENSMUSG00000005846.13	Rsl1d1	0.0683774	5.59244	3.65208	0.0687282	0.331864
	ENSMUSG00000005864.8	Cnga2	-0.0903937	0.767651	0.214823	0.647433	0.860899
	ENSMUSG00000005871.16	Apc	0.0516966	6.85429	2.16668	0.154781	0.480489
	ENSMUSG00000005873.7	Reep5	0.0430537	7.28764	2.77389	0.109577	0.413251
	ENSMUSG00000005881.14	Ergic3	0.0109762	6.5261	0.0733111	0.789026	0.924051
	ENSMUSG00000005882.19	Uqcc1	-0.0484565	5.14804	1.17308	0.290159	0.625152
	ENSMUSG00000005886.15	Ncoa2	-0.0549497	5.8191	1.55356	0.22534	0.566862
	ENSMUSG00000005893.15	Nr2c2	-0.277109	5.21812	9.06273	0.00630074	0.114545
	ENSMUSG00000005897.15	Nr2c1	-0.0559478	4.4095	1.37818	0.252601	0.591707
	ENSMUSG00000005899.15	Smpd4	0.0204046	5.45875	0.310446	0.582868	0.831024
	ENSMUSG00000005907.15	Pex1	-0.166456	3.64463	7.3498	0.0125581	0.153576
	ENSMUSG00000005917.16	Otx1	-0.252992	1.06244	0.827257	0.372638	0.69726
	ENSMUSG00000005936.20	Kctd20	0.0207027	6.84963	0.692076	0.414139	0.729946
	ENSMUSG00000005947.12	Itgae	-0.114189	3.0233	2.25895	0.146651	0.468392
	ENSMUSG00000005949.10	Ctns	0.051251	4.77089	2.53569	0.125151	0.438016
	ENSMUSG00000005950.15	P2rx5	0.128766	2.62684	1.88531	0.183165	0.517818
	ENSMUSG00000005951.14	Shpk	-0.105335	2.97457	1.94366	0.17679	0.508667
	ENSMUSG00000005958.16	Ephb3	-0.0524491	5.88409	0.975101	0.333836	0.66533
	ENSMUSG00000005968.15	Tuft1	0.109208	4.99113	1.24653	0.275914	0.612484
	ENSMUSG00000005973.7	Rcn1	0.0513847	6.26522	1.49288	0.234327	0.574314
	ENSMUSG00000005980.16	Dnase1	0.0277936	1.91562	0.099919	0.75482	0.912195
	ENSMUSG00000005981.12	Trap1	-0.0395003	5.97632	1.28517	0.26879	0.606903
	ENSMUSG00000005982.15	Naa60	0.0126732	6.23064	0.206549	0.653809	0.863537
	ENSMUSG00000005983.16	1700037C18Rik	-0.0614445	2.60366	0.528085	0.474852	0.769464
	ENSMUSG00000005986.17	Ankrd13d	-0.151773	2.31951	4.58205	0.0433029	0.265906
	ENSMUSG00000006005.19	Tpr	-0.0341915	7.06815	1.06487	0.312994	0.646262
	ENSMUSG00000006010.15	Odr4	0.0235109	5.55442	0.259573	0.615339	0.846473
	ENSMUSG00000006014.17	Prg4	-0.243202	0.896101	0.287273	0.597195	0.838171
	ENSMUSG00000006019.16	Dhx34	-0.0411157	4.48039	0.49994	0.486733	0.776166
	ENSMUSG00000006021.6	Kptn	-0.118442	3.81051	6.46985	0.0182712	0.181252
	ENSMUSG00000006024.14	Napa	0.0642357	6.52088	2.66307	0.116521	0.425358
	ENSMUSG00000006050.13	Sra1	0.0635218	5.10123	1.98377	0.172565	0.503135
	ENSMUSG00000006056.14	Calcoco2	0.0276743	0.19626	0.0193376	0.890631	0.965348
	ENSMUSG00000006057.16	Atp5g1	-0.0264407	5.37355	0.115812	0.736756	0.904165
	ENSMUSG00000006058.11	Snf8	0.0261923	5.00382	0.380573	0.543445	0.810236
	ENSMUSG00000006095.13	Tbcb	0.101495	4.96681	3.29108	0.0829185	0.362417
	ENSMUSG00000006127.10	Inpp5k	-0.0383599	7.05914	1.23994	0.277154	0.613299
	ENSMUSG00000006134.5	Crkl	0.181319	6.29455	27.0872	2.93911e-05	0.00667941
	ENSMUSG00000006154.14	Eps8l1	0.0712028	5.80705	0.296768	0.591236	0.835007
	ENSMUSG00000006169.21	Clint1	-0.0538014	6.74882	2.92099	0.101094	0.397611
	ENSMUSG00000006191.18	Cdkal1	0.0539417	3.77966	1.01086	0.32531	0.657269
	ENSMUSG00000006205.14	Htra1	-0.0046634	5.72549	0.00510771	0.943652	0.981815
	ENSMUSG00000006215.13	Zbtb17	0.0557944	4.4738	1.54986	0.225874	0.567105
	ENSMUSG00000006218.5	Fam131c	-0.265909	0.100111	2.03701	0.167145	0.49669
	ENSMUSG00000006219.13	Fblim1	0.0911214	6.2612	2.10409	0.160606	0.486503
	ENSMUSG00000006221.8	Hspb7	-0.487943	4.88155	2.92048	0.101122	0.397611
	ENSMUSG00000006235.7	Epor	-0.234484	2.52802	6.90859	0.0151267	0.167004
	ENSMUSG00000006241.17	Ccdc159	-0.0736884	2.4776	0.622205	0.438403	0.746193
	ENSMUSG00000006262.16	Mob1b	0.102086	5.53794	2.42758	0.133072	0.449282
	ENSMUSG00000006269.8	Atp6v1b1	0.0380591	2.8603	0.0253876	0.874816	0.959429
	ENSMUSG00000006273.15	Atp6v1b2	0.0450238	7.10861	1.9934	0.171568	0.501915
	ENSMUSG00000006276.11	Eps15l1	0.00231445	6.12075	0.0102129	0.920392	0.974421
	ENSMUSG00000006281.9	Tep1	-0.120639	5.5327	14.7898	0.000841646	0.0470542
	ENSMUSG00000006288.9	Ttc5	-0.0752637	5.33186	3.84963	0.062151	0.316246
	ENSMUSG00000006289.15	Osgep	0.00475545	5.01504	0.0135393	0.908393	0.971224
	ENSMUSG00000006299.14	Aamp	0.0332913	6.81276	0.619093	0.439535	0.746885
	ENSMUSG00000006301.18	Tmbim1	0.0748132	7.93378	2.66287	0.116533	0.425358
	ENSMUSG00000006304.15	Arpc2	0.0562863	7.63754	3.26444	0.0840927	0.364242
	ENSMUSG00000006307.17	Kmt2b	-0.0670873	6.96868	5.61656	0.0266962	0.215082
	ENSMUSG00000006310.11	Zbtb32	-0.0134371	1.59997	0.011288	0.916323	0.974163
	ENSMUSG00000006313.6	Upk1a	-0.0664633	0.928794	0.182423	0.673329	0.873431
	ENSMUSG00000006315.10	Tmem147	-0.00691553	4.79471	0.0128027	0.910909	0.971714
	ENSMUSG00000006333.15	Rps9	-0.0114285	8.72959	0.0470934	0.830142	0.940903
	ENSMUSG00000006335.17	Tfpt	-0.0101455	3.48623	0.0284728	0.867499	0.956792
	ENSMUSG00000006342.16	Susd2	-0.10441	4.20085	1.98407	0.172533	0.503135
	ENSMUSG00000006344.18	Ggt5	0.0354073	3.8485	0.232801	0.634082	0.854656
	ENSMUSG00000006345.11	Ggt1	-0.52844	1.04872	4.51143	0.044805	0.269801
	ENSMUSG00000006356.11	Crip2	0.155795	8.86331	6.51195	0.01794	0.180007
	ENSMUSG00000006360.12	Crip1	0.0225723	6.66206	0.0800715	0.779769	0.920914
	ENSMUSG00000006362.17	Cbfa2t3	-0.0737012	6.99474	1.05637	0.31489	0.64796
	ENSMUSG00000006369.15	Fbln1	-0.0641306	6.46282	1.18601	0.287581	0.623745
	ENSMUSG00000006373.11	Pgrmc1	-0.0263542	7.69759	0.244282	0.625887	0.850605
	ENSMUSG00000006378.16	ENSMUSG00000006378.16	0.240291	2.60515	3.63741	0.0692475	0.332885
	ENSMUSG00000006386.16	Tek	0.0875622	8.65569	3.1274	0.0904453	0.376504
	ENSMUSG00000006389.14	Mpl	-0.0190292	0.431781	0.00562106	0.940893	0.981285
	ENSMUSG00000006390.16	Elovl1	0.0383731	8.78248	0.309023	0.583727	0.831194
	ENSMUSG00000006392.17	Med8	0.0185802	5.38925	0.290087	0.595415	0.836747
	ENSMUSG00000006395.18	Hyi	0.0943315	4.27416	2.4202	0.133634	0.449697
	ENSMUSG00000006398.16	Cdc20	0.0116762	2.64685	0.00221067	0.962911	0.989556
	ENSMUSG00000006403.14	Adamts4	-0.202989	0.906622	0.990006	0.330246	0.661935
	ENSMUSG00000006411.13	Nectin4	-0.143646	4.55837	2.71597	0.113143	0.41992
	ENSMUSG00000006412.11	Pfdn2	0.0726927	5.09752	2.93605	0.10027	0.396508
	ENSMUSG00000006418.18	Rnf114	0.0351626	6.8058	0.636174	0.433377	0.742987
	ENSMUSG00000006423.16	Steep1	0.00978146	5.83514	0.0345935	0.854105	0.951488
	ENSMUSG00000006435.17	Neurl1a	-0.203791	3.1355	3.75916	0.0650696	0.324181
	ENSMUSG00000006442.11	Srm	0.00197567	3.4875	0.000729758	0.978685	0.995467
	ENSMUSG00000006445.4	Epha2	0.345123	6.40782	35.581	4.68359e-06	0.00182129
	ENSMUSG00000006456.11	Rbm14	0.149193	5.12093	6.71422	0.0164389	0.174871
	ENSMUSG00000006457.5	Actn3	0.80894	0.756603	0.873107	0.359946	0.687658
	ENSMUSG00000006462.8	A530013C23Rik	-0.158628	-0.178014	0.504046	0.484969	0.775445
	ENSMUSG00000006463.14	Zdhhc24	-0.105114	4.18087	6.31578	0.0195426	0.186567
	ENSMUSG00000006464.10	Bbs1	-0.093196	4.40491	2.48684	0.128659	0.44264
	ENSMUSG00000006471.19	ENSMUSG00000006471.19	-0.095562	5.49029	5.30736	0.0307578	0.228972
	ENSMUSG00000006476.20	Nsmf	0.0104904	5.96205	0.0608848	0.807324	0.931393
	ENSMUSG00000006494.12	Pdk1	-0.0680191	5.40773	1.37359	0.253368	0.592661
	ENSMUSG00000006498.17	Ptbp1	0.0895516	7.90227	5.24968	0.0315896	0.231539
	ENSMUSG00000006517.6	Mvd	0.0713941	3.62752	0.665968	0.422955	0.73574
	ENSMUSG00000006519.12	Cyba	-0.0912292	6.00623	3.09474	0.0920405	0.379683
	ENSMUSG00000006522.18	Itih3	-0.263651	1.3072	3.95786	0.0588534	0.307425
	ENSMUSG00000006526.14	Stimate	0.0454446	5.61318	1.17059	0.290658	0.625583
	ENSMUSG00000006527.17	Sfmbt1	0.0211086	4.33978	0.135583	0.716129	0.893877
	ENSMUSG00000006529.17	Itih1	0.131235	1.28368	1.2685	0.271832	0.609537
	ENSMUSG00000006542.14	Prkag3	0.0078367	2.88999	0.00380292	0.951368	0.985146
	ENSMUSG00000006567.12	Atp7b	0.0406269	6.1574	0.9111	0.349893	0.679444
	ENSMUSG00000006574.16	Slc4a1	0.713956	0.933751	6.05111	0.0219631	0.196388
	ENSMUSG00000006575.15	Rundc3a	-0.0761406	1.02867	0.541859	0.469214	0.766288
	ENSMUSG00000006576.17	Slc4a3	-0.0701818	4.97344	1.59272	0.21977	0.561435
	ENSMUSG00000006585.4	Cdt1	-0.175667	2.68989	4.01574	0.0571718	0.302342
	ENSMUSG00000006586.16	Runx1t1	-0.044535	3.14627	0.24971	0.622096	0.849124
	ENSMUSG00000006589.9	Aprt	0.0775057	4.78106	1.50694	0.232204	0.572125
	ENSMUSG00000006599.14	Gtf2h1	0.0905846	5.01938	4.04277	0.0564055	0.30032
	ENSMUSG00000006611.16	Hfe	-0.0347666	5.83411	0.655813	0.426463	0.737127
	ENSMUSG00000006638.17	Abhd1	0.130279	1.30797	0.765986	0.390643	0.711846
	ENSMUSG00000006641.13	Slc5a6	-0.0548515	3.25194	0.619931	0.43923	0.746826
	ENSMUSG00000006642.4	Tcf23	-0.253708	2.45183	1.17866	0.289042	0.624591
	ENSMUSG00000006649.18	Nphs1	0.0985924	4.97906	2.78194	0.109092	0.412578
	ENSMUSG00000006651.9	Aplp1	0.0421239	3.02416	0.208997	0.651907	0.862526
	ENSMUSG00000006673.15	Qrich1	-0.003246	6.32192	0.0162604	0.899657	0.968703
	ENSMUSG00000006675.11	P4htm	-0.0242324	3.77909	0.199275	0.659542	0.866987
	ENSMUSG00000006676.18	Usp19	-0.00125506	7.55165	0.00133583	0.971165	0.992383
	ENSMUSG00000006678.7	Pola1	-0.0633766	2.86935	0.587437	0.451322	0.754537
	ENSMUSG00000006699.18	Cdc42	0.0899703	8.48918	5.42746	0.0291033	0.223254
	ENSMUSG00000006705.14	Pknox1	-0.0554293	5.08029	2.18082	0.153501	0.478381
	ENSMUSG00000006711.16	D130043K22Rik	-0.204859	1.89929	2.07644	0.163262	0.490486
	ENSMUSG00000006715.12	Gmnn	-0.21158	2.89164	7.53876	0.0116092	0.147227
	ENSMUSG00000006717.8	Acot13	-0.0543506	4.55568	0.526173	0.475644	0.769874
	ENSMUSG00000006720.17	Zfp184	-0.164163	1.58306	1.54446	0.226659	0.567787
	ENSMUSG00000006728.13	Cdk4	0.01657	6.61595	0.242024	0.627479	0.851381
	ENSMUSG00000006731.11	B4galnt1	-0.190338	6.38501	10.9781	0.00307304	0.0840237
	ENSMUSG00000006732.15	Mettl1	-0.0937562	3.38756	1.2663	0.272239	0.609654
	ENSMUSG00000006736.10	Tspan31	0.083321	5.90523	5.77549	0.0248445	0.207735
	ENSMUSG00000006740.15	Kif5b	0.0297356	7.10795	0.461733	0.503697	0.786209
	ENSMUSG00000006763.15	Saal1	-0.0847895	3.43526	3.12017	0.0907957	0.377371
	ENSMUSG00000006777.8	Krt23	-0.0197871	4.31309	0.0263453	0.872498	0.958859
	ENSMUSG00000006782.17	Cnp	-0.184216	5.95879	14.3019	0.000984863	0.05028
	ENSMUSG00000006784.15	Odad4	-0.0143492	4.04123	0.0168114	0.89798	0.967817
	ENSMUSG00000006800.15	Sulf2	-0.109825	5.64186	3.30886	0.0821453	0.361429
	ENSMUSG00000006818.6	Sod2	0.00169177	6.52891	0.00212531	0.963633	0.989765
	ENSMUSG00000006850.9	Tmco6	-0.149789	3.94334	6.25932	0.0200329	0.189081
	ENSMUSG00000006906.11	Stambp	-0.0141572	4.76061	0.121491	0.73064	0.901273
	ENSMUSG00000006920.15	Ezh1	-0.0545733	6.79321	3.13118	0.0902632	0.376228
	ENSMUSG00000006930.16	Hap1	0.0761878	4.50871	1.32952	0.260906	0.599197
	ENSMUSG00000006931.16	P3h4	-0.00820267	4.66476	0.0158703	0.900861	0.968878
	ENSMUSG00000006932.18	Ctnnb1	0.0710647	9.75382	4.67607	0.0413902	0.261681
	ENSMUSG00000006941.6	Eif1b	0.107036	4.92089	6.87835	0.015323	0.16846
	ENSMUSG00000006958.15	Chrd	0.0347285	2.12804	0.118495	0.733846	0.903
	ENSMUSG00000006998.17	Psmd2	0.0369984	7.21886	1.26202	0.273027	0.61021
	ENSMUSG00000007029.17	Vars	-0.0977337	6.15805	4.26303	0.0505762	0.285599
	ENSMUSG00000007030.9	Vwa7	0.0145181	2.70665	0.0407513	0.84182	0.946479
	ENSMUSG00000007033.5	Hspa1l	0.110366	1.51129	0.439958	0.513833	0.793143
	ENSMUSG00000007034.16	Slc44a4	-0.0918497	3.8148	1.45531	0.240119	0.58052
	ENSMUSG00000007035.16	Msh5	-0.164579	2.0299	2.64125	0.117948	0.428143
	ENSMUSG00000007036.16	Abhd16a	0.0189258	6.00459	0.243101	0.626718	0.851196
	ENSMUSG00000007038.6	Neu1	0.0388122	5.45813	0.921588	0.347188	0.67661
	ENSMUSG00000007039.13	Ddah2	0.183557	5.66209	6.47893	0.0181992	0.180859
	ENSMUSG00000007041.10	Clic1	0.016056	7.12836	0.137706	0.714019	0.892809
	ENSMUSG00000007050.18	Lsm2	0.0738751	3.24107	0.883235	0.357226	0.685817
	ENSMUSG00000007080.15	Pole	-0.218989	1.87101	1.97901	0.173059	0.503719
	ENSMUSG00000007097.15	Atp1a2	-0.0380186	7.52584	0.23553	0.632112	0.853563
	ENSMUSG00000007122.12	Casq1	0.718076	1.0807	1.10816	0.303576	0.638001
	ENSMUSG00000007207.11	Stx1a	0.180927	2.70849	5.58654	0.027063	0.216344
	ENSMUSG00000007216.7	Zfp775	-0.13592	3.1795	3.11502	0.0910464	0.377809
	ENSMUSG00000007279.15	Scube2	-0.0312605	6.25094	0.172704	0.681628	0.877303
	ENSMUSG00000007338.11	Mrpl49	0.0861997	4.91328	3.59409	0.0708074	0.336095
	ENSMUSG00000007379.16	Dennd2c	0.109107	3.44885	1.50538	0.232438	0.572242
	ENSMUSG00000007411.17	Mark3	0.0791217	5.9427	5.10296	0.0338215	0.239419
	ENSMUSG00000007415.16	Gatad1	0.109262	5.76105	9.1661	0.00605312	0.112885
	ENSMUSG00000007458.15	M6pr	0.0566264	7.6779	4.26294	0.0505784	0.285599
	ENSMUSG00000007476.19	Lrrc8a	0.304822	6.10765	30.3143	1.41086e-05	0.00385761
	ENSMUSG00000007564.16	Ppp2r1a	0.0282358	7.6149	0.878118	0.358596	0.686852
	ENSMUSG00000007570.17	Fance	-0.0533498	4.21733	1.00234	0.327315	0.659472
	ENSMUSG00000007589.10	Tinf2	-0.0428065	5.33555	1.44698	0.241429	0.582076
	ENSMUSG00000007591.16	Tssk4	0.144183	0.219174	1.30034	0.275296	0.612011
	ENSMUSG00000007603.10	Dus3l	-0.0960358	5.47941	4.7866	0.0392624	0.256017
	ENSMUSG00000007610.16	Gtpbp3	-0.0818413	4.45965	3.00523	0.0965811	0.388701
	ENSMUSG00000007613.16	Tgfbr1	0.0144388	5.56078	0.0257626	0.873903	0.959375
	ENSMUSG00000007617.19	Homer1	0.0966809	2.5447	0.808747	0.377947	0.701833
	ENSMUSG00000007646.14	Rad51c	-0.195379	0.728617	1.8249	0.190064	0.525896
	ENSMUSG00000007655.17	Cav1	0.178404	10.2815	12.17	0.00201414	0.0704907
	ENSMUSG00000007656.14	Arpp19	0.0812936	5.90883	5.18915	0.0324898	0.234546
	ENSMUSG00000007659.19	Bcl2l1	0.239309	6.8611	20.939	0.000138345	0.0174166
	ENSMUSG00000007670.11	Khsrp	-0.030945	6.65521	0.708565	0.408715	0.724998
	ENSMUSG00000007682.9	Dio2	-0.0324072	0.642412	0.0299697	0.864096	0.95532
	ENSMUSG00000007721.7	Ccdc124	0.0627064	4.72172	1.07386	0.311005	0.644514
	ENSMUSG00000007739.11	Cct4	0.0484725	6.6759	2.1138	0.159685	0.48589
	ENSMUSG00000007777.10	0610009B22Rik	0.0842764	3.06161	1.60766	0.217692	0.559385
	ENSMUSG00000007783.11	Cpt1c	0.0260387	3.30741	0.121537	0.730591	0.901273
	ENSMUSG00000007805.5	Twist2	-0.16361	0.775721	1.52115	0.230084	0.571203
	ENSMUSG00000007812.17	Zfp655	0.10512	5.21782	1.85297	0.186819	0.521877
	ENSMUSG00000007815.14	Rhoa	0.113474	8.9623	10.8344	0.00323758	0.086232
	ENSMUSG00000007817.16	Zmiz1	-0.0547332	7.995	1.43249	0.243729	0.584088
	ENSMUSG00000007827.11	Ankrd26	-0.0404795	3.23976	0.339433	0.565908	0.822699
	ENSMUSG00000007833.16	Aldh16a1	-0.0821328	4.85015	3.67711	0.0678524	0.329747
	ENSMUSG00000007836.7	Hnrnpa0	-0.0486246	6.71245	1.21373	0.282157	0.618937
	ENSMUSG00000007837.12	Prrg2	0.00531141	4.19342	0.00761509	0.931228	0.978597
	ENSMUSG00000007850.17	Hnrnph1	0.0585422	8.19873	2.78826	0.108713	0.411856
	ENSMUSG00000007867.10	Ift43	0.0869516	4.80119	2.53761	0.125015	0.437997
	ENSMUSG00000007872.4	Id3	-0.170572	7.08421	8.64803	0.00741262	0.121001
	ENSMUSG00000007877.3	Tcap	-0.599857	5.21355	4.16656	0.0530409	0.290985
	ENSMUSG00000007880.17	Arid1a	0.0115186	7.86263	0.102122	0.752224	0.910631
	ENSMUSG00000007888.16	Crlf1	0.117596	4.30016	3.07543	0.0929985	0.381772
	ENSMUSG00000007891.17	Ctsd	0.0180582	9.36347	0.0951229	0.76058	0.913563
	ENSMUSG00000007892.9	Rplp1	0.0419592	8.79328	0.466753	0.50141	0.78502
	ENSMUSG00000007908.15	Hmgcll1	0.188164	3.65572	8.14859	0.0090483	0.132343
	ENSMUSG00000007950.10	Abhd8	-0.103965	4.37858	2.37074	0.137475	0.454932
	ENSMUSG00000007987.13	Ift22	0.0207847	4.41458	0.202124	0.657282	0.865185
	ENSMUSG00000007989.8	Fzd3	0.154621	3.47295	3.62636	0.0696415	0.333611
	ENSMUSG00000008035.13	Mid1ip1	0.0564509	7.64038	0.889863	0.355462	0.684746
	ENSMUSG00000008036.12	Ap2s1	0.015451	5.45281	0.0675438	0.797294	0.927341
	ENSMUSG00000008090.15	Fgfrl1	0.0683165	4.71096	2.095	0.161473	0.487513
	ENSMUSG00000008129.15	Brme1	-0.219656	0.221826	1.6531	0.21152	0.55228
	ENSMUSG00000008136.15	Fhl2	-0.406999	2.82366	2.44892	0.131462	0.44695
	ENSMUSG00000008140.19	Emc10	0.0644233	6.24282	1.51257	0.231361	0.572062
	ENSMUSG00000008153.13	Clstn3	-0.141252	1.42589	0.259178	0.615606	0.846628
	ENSMUSG00000008167.15	Fbxw9	-0.0688716	4.22768	1.33015	0.260797	0.599197
	ENSMUSG00000008193.14	Spib	-0.602988	4.29121	15.5716	0.00065742	0.0415314
	ENSMUSG00000008200.16	Fnbp4	-0.0710473	6.55916	2.2938	0.143713	0.464133
	ENSMUSG00000008206.17	Cers4	0.0740558	6.55955	3.56639	0.0718259	0.338691
	ENSMUSG00000008226.15	Scrn3	0.0421348	4.82662	0.829301	0.372059	0.696918
	ENSMUSG00000008301.12	Phax	0.0769078	4.97618	4.92714	0.0367324	0.248618
	ENSMUSG00000008305.19	Tle1	0.0241763	5.72942	0.148334	0.703723	0.888233
	ENSMUSG00000008307.12	1700109H08Rik	-0.392343	0.775902	3.85488	0.0619862	0.316009
	ENSMUSG00000008318.11	Relt	-0.288594	2.83992	8.788	0.00701485	0.119062
	ENSMUSG00000008333.13	Snrpb2	0.0606962	4.4807	1.23705	0.277698	0.613721
	ENSMUSG00000008348.10	Ubc	-0.171374	7.99334	5.07451	0.0342746	0.241065
	ENSMUSG00000008373.17	Prpf31	-0.0409023	5.0108	0.971024	0.334828	0.666258
	ENSMUSG00000008384.9	Sertad1	0.531713	4.63044	60.4985	7.65825e-08	8.93411e-05
	ENSMUSG00000008393.10	Carhsp1	0.113531	7.07554	6.77734	0.0159993	0.172185
	ENSMUSG00000008398.17	Elk3	0.0623867	7.38381	2.79817	0.108121	0.410592
	ENSMUSG00000008429.9	Herpud2	0.0818577	5.79946	8.43277	0.00807375	0.125362
	ENSMUSG00000008435.16	Rdh13	0.0824763	4.18748	1.92344	0.178968	0.512061
	ENSMUSG00000008450.9	Nutf2	0.0416729	4.42625	0.56341	0.460612	0.760645
	ENSMUSG00000008475.14	Arpc5	0.065029	7.22302	3.72363	0.0662582	0.325895
	ENSMUSG00000008496.20	Pou2f2	-0.425556	4.64929	9.69193	0.00494855	0.101797
	ENSMUSG00000008540.12	Mgst1	-0.15283	7.63441	3.69411	0.0672649	0.328148
	ENSMUSG00000008575.18	Nfib	0.0756106	7.71402	2.92843	0.100685	0.39736
	ENSMUSG00000008601.13	Rab25	0.0427681	4.74203	0.150449	0.701726	0.88668
	ENSMUSG00000008604.12	Ubqln4	0.12281	6.10723	8.94105	0.00660664	0.116405
	ENSMUSG00000008658.17	Rbfox1	-0.501863	0.450583	2.47139	0.129792	0.444151
	ENSMUSG00000008668.16	Rps18	-0.0205389	8.24537	0.107591	0.745915	0.908323
	ENSMUSG00000008682.14	Rpl10	0.0253282	9.30543	0.348554	0.560774	0.819867
	ENSMUSG00000008683.17	Rps15a	-0.00595895	7.47281	0.010717	0.918458	0.974362
	ENSMUSG00000008690.16	Ncaph2	0.0578077	6.52095	2.77394	0.109574	0.413251
	ENSMUSG00000008730.18	Hipk1	-0.0202567	7.73286	0.23629	0.631566	0.853431
	ENSMUSG00000008734.10	Gprc5b	-0.0672991	5.68462	2.22001	0.150018	0.473539
	ENSMUSG00000008763.17	Man1a2	0.0207022	5.78184	0.225796	0.639206	0.856744
	ENSMUSG00000008822.16	Acyp1	0.0327503	2.90722	0.257428	0.616795	0.84713
	ENSMUSG00000008845.10	Cd163	-0.327045	3.42887	6.2396	0.0202075	0.190181
	ENSMUSG00000008855.18	Hdac5	0.0492281	7.09456	1.12042	0.300979	0.635324
	ENSMUSG00000008859.9	Rala	0.124362	5.91075	8.28408	0.00856836	0.129065
	ENSMUSG00000008892.13	Vdac3	0.0554462	6.16697	2.02597	0.168251	0.497542
	ENSMUSG00000008958.15	Vps72	-0.0215752	5.538	0.287011	0.597361	0.838219
	ENSMUSG00000008976.17	Gabpa	-0.0522482	5.546	1.7073	0.20444	0.543611
	ENSMUSG00000008999.8	Bmp7	-0.107192	2.31191	0.851423	0.365869	0.691847
	ENSMUSG00000009013.6	Dynll1	0.260148	7.28052	18.2225	0.000296064	0.0270488
	ENSMUSG00000009030.15	Pdcl	0.036809	5.15372	0.898006	0.353312	0.682482
	ENSMUSG00000009035.16	Tmem184b	0.0706837	7.41704	2.85004	0.105086	0.40433
	ENSMUSG00000009070.15	Rsph14	-0.0473814	2.14717	0.107808	0.745668	0.90816
	ENSMUSG00000009073.17	Nf2	0.0124649	7.09905	0.177294	0.677675	0.875381
	ENSMUSG00000009075.3	Cabp7	-0.442154	-0.488885	4.20432	0.0520602	0.289239
	ENSMUSG00000009076.11	Zmat5	0.00818577	4.02946	0.0140439	0.90671	0.970726
	ENSMUSG00000009079.17	Ewsr1	0.0327204	7.9009	1.25229	0.274835	0.611798
	ENSMUSG00000009090.18	Ap1b1	-0.014011	6.32709	0.263584	0.612637	0.844935
	ENSMUSG00000009092.6	Derl3	-0.0645557	0.956959	0.14007	0.71169	0.891872
	ENSMUSG00000009097.11	Tbx1	-0.0969974	3.70819	0.655624	0.426529	0.737168
	ENSMUSG00000009112.5	Bcl2l13	-0.00752924	5.55802	0.0508658	0.823585	0.938703
	ENSMUSG00000009114.18	2610028H24Rik	0.0109588	5.17909	0.017773	0.89512	0.967015
	ENSMUSG00000009145.7	Dqx1	0.0350448	3.29914	0.214582	0.647617	0.860947
	ENSMUSG00000009185.3	Ccl8	-0.376034	1.21081	1.84308	0.187954	0.522726
	ENSMUSG00000009207.16	Lnpk	0.117099	2.73682	1.40166	0.248715	0.588123
	ENSMUSG00000009210.11	Prr29	-0.187018	2.48788	2.56073	0.123396	0.43473
	ENSMUSG00000009281.7	Rarres2	0.146404	7.05927	4.63769	0.0421592	0.26348
	ENSMUSG00000009291.14	Pttg1ip	0.0522326	7.94667	2.28917	0.1441	0.46447
	ENSMUSG00000009292.19	Trpm2	-0.53866	2.67646	14.7589	0.000849998	0.0472194
	ENSMUSG00000009293.18	Ube2g2	0.0394825	5.70754	0.800166	0.380445	0.703668
	ENSMUSG00000009376.16	Met	0.102763	5.88295	3.48172	0.0750451	0.345856
	ENSMUSG00000009378.5	Slc16a12	-0.00626466	3.22623	0.00366336	0.952267	0.985455
	ENSMUSG00000009394.14	Syn2	-0.0370952	3.57326	0.117591	0.734823	0.90325
	ENSMUSG00000009406.14	Elk1	-0.00904644	4.2153	0.0188416	0.892034	0.965708
	ENSMUSG00000009418.17	Nav1	-0.105167	6.72075	5.03846	0.0348582	0.242828
	ENSMUSG00000009470.18	Tnpo1	0.0932777	5.97586	1.68514	0.207297	0.54744
	ENSMUSG00000009535.14	Rnmt	0.00341337	4.39785	0.00408917	0.949573	0.984325
	ENSMUSG00000009545.15	Kcnq1	0.0223908	5.07698	0.130962	0.720789	0.896516
	ENSMUSG00000009549.15	Srp14	0.106995	5.86967	5.68993	0.0258228	0.212389
	ENSMUSG00000009551.3	6330409D20Rik	0.182632	-0.305061	0.938106	0.342988	0.673067
	ENSMUSG00000009555.17	Cdk9	0.00871792	6.27568	0.0973051	0.757939	0.912876
	ENSMUSG00000009563.17	Tor2a	0.00655626	4.79744	0.0201995	0.888237	0.964581
	ENSMUSG00000009566.13	Fpgs	-0.00320949	4.26857	0.00456575	0.94672	0.983114
	ENSMUSG00000009569.15	Mrtfb	-0.0858702	6.35171	3.73644	0.0658267	0.325322
	ENSMUSG00000009575.15	Cbx5	0.00095288	6.83996	0.000540768	0.981651	0.996134
	ENSMUSG00000009585.19	Apobec3	-0.132656	6.3396	7.41692	0.0122116	0.151441
	ENSMUSG00000009614.17	Sardh	0.0389483	4.02192	0.746477	0.396646	0.716043
	ENSMUSG00000009621.19	Vav2	-0.022952	5.88667	0.320621	0.576799	0.828823
	ENSMUSG00000009628.15	Tex15	0.118895	3.00088	1.66416	0.21005	0.550579
	ENSMUSG00000009630.11	Ppp2cb	0.152351	6.33695	21.2418	0.000127501	0.0167755
	ENSMUSG00000009633.4	G0s2	-0.303596	6.07898	1.51496	0.231005	0.572004
	ENSMUSG00000009640.12	Dmap1	-0.0837775	4.48553	3.34176	0.0807365	0.358674
	ENSMUSG00000009647.14	Mcu	0.020141	4.88391	0.247476	0.62365	0.849781
	ENSMUSG00000009654.5	Oit3	0.151065	0.407692	0.827566	0.37255	0.697173
	ENSMUSG00000009670.12	Tex11	0.430518	1.40037	7.07124	0.0141176	0.16279
	ENSMUSG00000009681.11	Bcr	0.122137	6.76625	8.64066	0.00743424	0.121128
	ENSMUSG00000009687.15	Fxyd5	0.051474	6.31367	0.803043	0.379605	0.703199
	ENSMUSG00000009731.5	Kcnd1	-0.220266	0.790705	1.61528	0.216641	0.558251
	ENSMUSG00000009733.10	Tfcp2	-0.0338031	4.20213	0.695934	0.41286	0.728731
	ENSMUSG00000009739.18	Pou6f1	0.00538137	6.08204	0.0109182	0.917699	0.974184
	ENSMUSG00000009741.16	Ubp1	-0.0292894	6.68773	0.494636	0.489029	0.777278
	ENSMUSG00000009772.16	Nuak2	-0.101051	4.30926	3.42613	0.0772484	0.350927
	ENSMUSG00000009828.16	Cilk1	0.104433	5.88604	10.7756	0.00330763	0.0875647
	ENSMUSG00000009863.15	Sdhb	-0.0496857	6.01744	0.575186	0.45602	0.758128
	ENSMUSG00000009876.14	Cox4i2	0.0698054	5.3815	0.990139	0.330214	0.661935
	ENSMUSG00000009894.16	Snap47	-0.0134008	5.29116	0.0616521	0.806139	0.930843
	ENSMUSG00000009900.8	Wnt3a	0.11353	4.56257	3.28198	0.0833174	0.362538
	ENSMUSG00000009905.6	Kdsr	0.0552838	5.42548	1.14287	0.2963	0.630786
	ENSMUSG00000009907.18	Vps4b	0.0233631	6.34364	0.250072	0.621845	0.848936
	ENSMUSG00000009927.10	Rps25	0.0268306	8.20406	0.186302	0.67009	0.872362
	ENSMUSG00000009995.18	Tafazzin	-0.04482	6.30195	2.54745	0.124323	0.437291
	ENSMUSG00000010021.14	Kif19a	-0.209141	3.98482	2.73776	0.111786	0.417443
	ENSMUSG00000010025.20	Aldh3a2	0.108023	7.08409	9.05623	0.00631669	0.114545
	ENSMUSG00000010044.13	Zmynd10	-0.0616343	3.96138	0.33281	0.569695	0.824132
	ENSMUSG00000010045.3	Tmem115	0.0717775	5.50896	3.75513	0.0652031	0.324181
	ENSMUSG00000010047.13	Hyal2	0.0338348	6.42761	0.228434	0.637265	0.855763
	ENSMUSG00000010048.11	Ifrd2	-0.0241842	4.1077	0.302911	0.587447	0.833152
	ENSMUSG00000010051.16	Hyal1	0.0181106	5.75414	0.0962587	0.759201	0.913246
	ENSMUSG00000010054.5	Tusc2	0.0279876	4.9668	0.398648	0.534105	0.805399
	ENSMUSG00000010057.9	Nprl2	0.157262	3.90665	8.50476	0.00784568	0.124021
	ENSMUSG00000010064.16	Slc38a3	-0.182286	-0.454569	0.22002	0.643505	0.859202
	ENSMUSG00000010066.16	Cacna2d2	-1.01719	-0.285352	3.34126	0.0807574	0.358674
	ENSMUSG00000010067.14	Rassf1	0.19889	5.91388	27.5593	2.6318e-05	0.00614052
	ENSMUSG00000010080.16	Epn3	0.133711	6.2555	3.77208	0.0646434	0.323291
	ENSMUSG00000010095.14	Slc3a2	0.039512	7.70491	0.531111	0.473604	0.76911
	ENSMUSG00000010097.16	Nxf1	-0.0140901	7.41728	0.178885	0.67632	0.874587
	ENSMUSG00000010110.18	Stx5a	0.06436	6.604	3.33345	0.0810896	0.358938
	ENSMUSG00000010122.15	Slc47a1	-0.156226	2.04768	0.635067	0.433772	0.743518
	ENSMUSG00000010136.15	Pifo	-0.0832846	3.23562	0.573311	0.456746	0.758815
	ENSMUSG00000010142.13	Tnfrsf13b	-0.365584	3.5997	9.42261	0.00548369	0.107698
	ENSMUSG00000010154.8	Spire2	-0.106562	2.35933	0.864258	0.362346	0.689408
	ENSMUSG00000010175.14	Prox1	-0.236461	1.83856	2.59992	0.120708	0.430285
	ENSMUSG00000010205.12	Raver1	-0.0421551	6.25624	1.4345	0.243407	0.583716
	ENSMUSG00000010277.8	Bltp2	-0.035942	7.77695	0.638602	0.432513	0.742524
	ENSMUSG00000010290.8	AI597479	0.0991641	4.96007	4.82491	0.038554	0.254223
	ENSMUSG00000010307.8	Tmem86a	-0.154167	4.2709	4.04193	0.0564292	0.30032
	ENSMUSG00000010342.17	Tex14	-0.0987838	-0.226011	0.272634	0.606637	0.842478
	ENSMUSG00000010358.14	Ifi35	0.0280364	5.75889	0.349726	0.560121	0.819391
	ENSMUSG00000010362.10	Rdm1	-0.0580672	4.2716	0.666136	0.422898	0.73574
	ENSMUSG00000010376.16	Nedd8	0.0599269	5.73507	0.975824	0.333661	0.665307
	ENSMUSG00000010392.9	Gosr1	-0.0197063	5.93192	0.616626	0.440436	0.74769
	ENSMUSG00000010406.13	Mrpl52	0.0448604	4.68567	0.353315	0.55813	0.818188
	ENSMUSG00000010453.13	Kansl3	-0.020255	6.65967	0.304179	0.586671	0.832774
	ENSMUSG00000010492.11	Uckl1os	-0.235378	3.61791	3.28131	0.0833471	0.362538
	ENSMUSG00000010517.8	Faf1	0.0280076	5.12141	0.715645	0.406419	0.723407
	ENSMUSG00000010538.15	Tsacc	0.319459	0.0148705	5.16248	0.0328955	0.236694
	ENSMUSG00000010554.15	Mettl16	0.11315	4.66773	7.66812	0.0110053	0.143951
	ENSMUSG00000010601.15	Apol7a	-0.0881949	-0.435356	0.138292	0.713439	0.892769
	ENSMUSG00000010607.9	Pigyl	-0.0527789	3.951	0.670934	0.421256	0.734658
	ENSMUSG00000010608.16	Rbm25	-0.0973517	6.99388	7.66782	0.0110067	0.143951
	ENSMUSG00000010609.16	Psen2	-0.101198	5.05647	2.04053	0.166793	0.4963
	ENSMUSG00000010651.5	Acaa1b	-0.131622	2.6837	0.788608	0.383849	0.70638
	ENSMUSG00000010660.4	Plcd1	0.0436303	4.2156	0.175647	0.679087	0.875965
	ENSMUSG00000010663.6	Fads1	0.0679649	7.50046	2.65516	0.117035	0.426484
	ENSMUSG00000010721.16	Lmbr1	0.0230381	4.36052	0.242409	0.627207	0.851356
	ENSMUSG00000010751.16	Tnfrsf22	0.0607409	3.30623	0.742872	0.39777	0.716683
	ENSMUSG00000010755.18	Cars	-0.0660029	4.55058	1.03718	0.319227	0.651611
	ENSMUSG00000010760.6	Phlda2	0.00974033	-0.210212	0.00230255	0.962149	0.989286
	ENSMUSG00000010797.7	Wnt2	0.158269	4.6619	3.52816	0.0732595	0.341947
	ENSMUSG00000010830.9	Kdelr3	0.22947	3.56779	4.00277	0.057544	0.303668
	ENSMUSG00000010911.13	Apip	0.100674	3.74135	3.6537	0.068671	0.331679
	ENSMUSG00000010914.11	Pdhx	0.0167779	4.12259	0.088352	0.76899	0.916719
	ENSMUSG00000010936.12	Vac14	-0.0914303	5.05443	5.67799	0.0259628	0.212418
	ENSMUSG00000011008.14	Mcoln2	-0.322528	1.01464	2.67246	0.115912	0.423692
	ENSMUSG00000011034.7	Slc5a1	-0.0298805	2.38268	0.0336331	0.85612	0.952386
	ENSMUSG00000011096.18	Akt1s1	0.00665764	5.16147	0.0154444	0.902193	0.96927
	ENSMUSG00000011114.19	Tbrg1	0.0253271	6.41954	0.384848	0.541208	0.809271
	ENSMUSG00000011148.15	Adssl1	-0.0819427	4.19064	0.830217	0.371799	0.696885
	ENSMUSG00000011154.18	Cfap161	-0.066727	3.65734	0.415248	0.525786	0.800315
	ENSMUSG00000011158.9	Brf1	-0.0677283	5.66911	5.00368	0.035432	0.244972
	ENSMUSG00000011171.12	Vipr2	0.0208995	5.32964	0.0623107	0.805129	0.930843
	ENSMUSG00000011179.9	Odc1	-0.0212596	6.45447	0.129351	0.722435	0.897033
	ENSMUSG00000011254.17	Thg1l	-0.0854602	2.77747	1.48381	0.235708	0.575909
	ENSMUSG00000011256.17	Adam19	0.0189396	6.62257	0.151837	0.700423	0.886176
	ENSMUSG00000011257.20	Pabpc4	-0.0302898	5.01428	0.329234	0.571761	0.825583
	ENSMUSG00000011263.17	Exoc3l2	-0.278655	1.72348	3.70182	0.0670003	0.327405
	ENSMUSG00000011267.9	Zfp296	-0.159245	1.23535	1.14287	0.296301	0.630786
	ENSMUSG00000011305.12	Plin5	-0.270475	2.24074	2.38622	0.136259	0.453392
	ENSMUSG00000011306.8	Sugp1	-0.0887453	5.26869	4.86454	0.037836	0.252611
	ENSMUSG00000011382.9	Dhdh	-0.0283295	5.12658	0.244827	0.625504	0.850481
	ENSMUSG00000011427.17	Zfp790	0.166038	4.3962	8.61288	0.00751637	0.121734
	ENSMUSG00000011463.6	Cpb1	-0.0799545	0.411781	0.18066	0.674815	0.874112
	ENSMUSG00000011658.17	Fuz	-0.106823	5.00689	9.75503	0.00483165	0.101014
	ENSMUSG00000011752.8	Pgam1	0.0645155	6.63068	2.04529	0.166319	0.495935
	ENSMUSG00000011831.17	Evi5	0.014649	5.69592	0.0988042	0.756145	0.912706
	ENSMUSG00000011832.17	Evi5l	0.0132819	4.96558	0.102549	0.751725	0.910443
	ENSMUSG00000011837.5	Snapc2	-0.132755	4.07708	6.99513	0.0145801	0.164287
	ENSMUSG00000011877.14	Git1	0.0884626	6.84146	3.90761	0.0603589	0.311399
	ENSMUSG00000011884.14	Gltp	-0.0100678	7.04531	0.0406121	0.842086	0.946481
	ENSMUSG00000011958.18	Bnip2	0.107745	7.00828	8.37863	0.00825009	0.12658
	ENSMUSG00000011960.13	Ccnt1	0.153158	5.52335	5.2334	0.0318289	0.23246
	ENSMUSG00000012017.5	Scarf2	0.0382692	7.09214	0.349579	0.560203	0.819443
	ENSMUSG00000012076.9	Brms1l	-0.0135131	4.68171	0.0816789	0.777631	0.920177
	ENSMUSG00000012114.18	Med15	-0.0577815	6.17273	3.09914	0.0918234	0.379145
	ENSMUSG00000012117.14	Dhdds	-0.01317	5.66651	0.181387	0.674201	0.873946
	ENSMUSG00000012123.18	Crybg2	-0.0897197	3.66256	0.503357	0.485264	0.775492
	ENSMUSG00000012126.17	Ubxn11	-0.177096	4.24072	3.59337	0.0708337	0.336095
	ENSMUSG00000012296.17	Tjap1	0.0529702	4.82057	1.64325	0.212838	0.553988
	ENSMUSG00000012350.16	Ehf	-0.130744	5.49335	2.13051	0.158115	0.484436
	ENSMUSG00000012405.17	Rpl15	0.0433231	7.85309	1.0569	0.314771	0.64796
	ENSMUSG00000012422.15	Tmem167	0.0626116	4.85964	0.954042	0.339004	0.669813
	ENSMUSG00000012428.10	Steap4	-0.21038	4.16114	2.12657	0.158484	0.484925
	ENSMUSG00000012429.10	Mplkip	0.00941663	3.85008	0.0231608	0.880386	0.961125
	ENSMUSG00000012443.5	Kif11	-0.0153887	2.4023	0.00709599	0.933607	0.979448
	ENSMUSG00000012483.5	Rpa3	0.0660596	2.67993	0.683445	0.417022	0.731727
	ENSMUSG00000012519.15	Mlkl	-0.0312658	3.11908	0.1858	0.670507	0.872362
	ENSMUSG00000012535.15	Tnpo3	-0.0117269	6.2424	0.144179	0.707696	0.8901
	ENSMUSG00000012609.20	Ttll5	-0.0305486	4.29656	0.371945	0.548013	0.812798
	ENSMUSG00000012640.17	Zfp715	0.103195	5.38186	3.79629	0.0638532	0.32099
	ENSMUSG00000012705.17	Retn	-0.47384	2.56375	0.758727	0.39286	0.713085
	ENSMUSG00000012819.17	Cdh23	-0.391437	-0.00115704	2.96147	0.0988952	0.394656
	ENSMUSG00000012848.16	Rps5	0.0304063	8.26041	0.276396	0.60418	0.841361
	ENSMUSG00000012889.9	Podnl1	-0.490462	1.42852	11.1166	0.00292319	0.0824393
	ENSMUSG00000013033.17	Adgrl1	0.050873	6.94075	1.31225	0.263939	0.601624
	ENSMUSG00000013076.18	Amotl1	-0.0227191	7.31972	0.220286	0.643306	0.859066
	ENSMUSG00000013089.16	Etv5	0.0475926	7.8594	0.725688	0.403196	0.721194
	ENSMUSG00000013150.16	Gfod2	0.142112	4.29623	4.4413	0.0463551	0.27434
	ENSMUSG00000013155.11	Enkd1	-0.0611602	2.72497	0.633661	0.434275	0.743719
	ENSMUSG00000013160.8	Atp6v0d1	0.0421748	6.54739	1.22726	0.279558	0.615451
	ENSMUSG00000013236.18	Ptprs	-0.00320815	6.72569	0.00527865	0.942719	0.981709
	ENSMUSG00000013275.10	Slc41a1	-0.0404022	6.00453	1.26238	0.272962	0.61021
	ENSMUSG00000013338.17	Fer1l4	0.0573724	1.48959	0.130807	0.720946	0.896528
	ENSMUSG00000013367.6	Iglon5	-0.138496	-0.486776	0.751922	0.405945	0.723407
	ENSMUSG00000013415.10	Igf2bp1	-0.169779	1.68109	1.88343	0.183375	0.517943
	ENSMUSG00000013419.8	Zfp651	0.0851837	5.18957	6.62408	0.0170899	0.177783
	ENSMUSG00000013465.20	Nelfb	0.0238013	6.32651	0.555559	0.463715	0.763177
	ENSMUSG00000013495.16	Tmem175	0.0028974	4.93666	0.00448006	0.947222	0.983114
	ENSMUSG00000013523.14	Bcas1	-0.188542	2.96611	4.42452	0.046735	0.274896
	ENSMUSG00000013539.15	Tango2	-0.153359	4.25914	10.5021	0.0036561	0.0905919
	ENSMUSG00000013584.6	Aldh1a2	0.194577	4.96274	5.30328	0.0308159	0.229058
	ENSMUSG00000013593.13	Ndufs2	-0.0299447	6.62617	0.331708	0.57033	0.824402
	ENSMUSG00000013622.16	Atraid	0.0144143	5.87454	0.16042	0.692521	0.883061
	ENSMUSG00000013629.17	Cad	-0.0969845	5.16766	3.67159	0.0680443	0.330282
	ENSMUSG00000013646.18	Sh3bp5l	0.0619218	5.45325	2.75564	0.110686	0.415109
	ENSMUSG00000013662.7	Atad1	0.0603189	6.02878	2.04495	0.166353	0.495935
	ENSMUSG00000013663.8	ENSMUSG00000013663.8	0.115191	6.8394	1.86071	0.185937	0.520786
	ENSMUSG00000013698.13	Pea15a	0.133842	8.08341	10.0408	0.00433886	0.0974403
	ENSMUSG00000013701.14	Timm23	-0.000505549	5.18099	0.000135023	0.990831	0.997954
	ENSMUSG00000013707.4	Tnfaip8l2	-0.0980723	3.4655	0.676407	0.419396	0.732933
	ENSMUSG00000013736.17	Trnt1	0.00938213	4.55999	0.033818	0.85573	0.952086
	ENSMUSG00000013766.12	Ly6g6e	-0.353772	0.651615	1.00571	0.326521	0.658498
	ENSMUSG00000013787.16	Ehmt2	-0.0110031	6.94229	0.117814	0.734581	0.903143
	ENSMUSG00000013822.8	Elof1	-0.0238297	6.03844	0.201795	0.657542	0.865403
	ENSMUSG00000013833.16	Med16	-0.0272068	5.41068	0.394598	0.536171	0.806516
	ENSMUSG00000013846.11	St3gal1	0.0435589	7.88158	1.66602	0.209805	0.550348
	ENSMUSG00000013858.15	Tmem259	-0.0121461	6.843	0.0633918	0.803482	0.930312
	ENSMUSG00000013878.19	Rnf170	-0.0660425	4.38787	1.07061	0.311722	0.645084
	ENSMUSG00000013921.16	Clip3	-0.0480677	3.08625	0.296801	0.591216	0.835007
	ENSMUSG00000013973.13	Dedd	0.0561126	4.92901	2.44692	0.131612	0.447287
	ENSMUSG00000013974.4	Mcemp1	0.12137	3.89346	1.74844	0.199263	0.53719
	ENSMUSG00000013997.11	Nit1	0.034371	5.57703	1.10466	0.304324	0.638228
	ENSMUSG00000014030.16	Pax5	-0.459712	4.63054	6.99887	0.0145571	0.164223
	ENSMUSG00000014039.19	Prdm15	-0.164454	3.84613	9.98491	0.00443078	0.0975247
	ENSMUSG00000014074.18	Rnf168	-0.0232965	4.96666	0.122105	0.729989	0.900981
	ENSMUSG00000014075.16	Dynlt2b	-0.0635061	2.77758	0.592313	0.449473	0.753878
	ENSMUSG00000014077.14	Chp1	0.0787112	7.45407	6.81138	0.0157678	0.170642
	ENSMUSG00000014158.13	Trpv4	-0.148834	3.62072	2.01939	0.168914	0.498265
	ENSMUSG00000014164.16	Klhl3	-0.149308	3.2144	2.36323	0.138069	0.455453
	ENSMUSG00000014177.11	Tvp23b	0.0882787	4.80726	3.55588	0.0722168	0.339736
	ENSMUSG00000014195.17	Dnajc7	-0.0603133	7.15477	3.77292	0.0646157	0.323269
	ENSMUSG00000014226.11	Cacybp	0.133502	4.78045	6.62152	0.0171087	0.177783
	ENSMUSG00000014232.15	Cluap1	0.00950575	4.23926	0.0316056	0.860475	0.953668
	ENSMUSG00000014243.6	Zswim7	-0.237534	1.42482	3.10445	0.0915627	0.378887
	ENSMUSG00000014245.9	Pigl	-0.131632	3.26248	4.29517	0.0497841	0.283677
	ENSMUSG00000014294.5	Ndufa2	0.00589095	5.33224	0.00877314	0.926198	0.976873
	ENSMUSG00000014301.14	Pam16	-0.0795242	3.33865	0.891665	0.354985	0.684203
	ENSMUSG00000014303.14	Glis2	-0.00168981	6.4349	0.000580964	0.980981	0.996119
	ENSMUSG00000014313.16	Cox6c	0.0102291	6.63675	0.0427868	0.837974	0.944097
	ENSMUSG00000014329.15	Bicc1	0.000394916	5.99215	0.000103003	0.991991	0.997958
	ENSMUSG00000014349.8	Ube2z	0.0729329	6.82838	8.50494	0.00784512	0.124021
	ENSMUSG00000014353.16	Tmem87b	0.0653631	5.8617	2.34306	0.139681	0.456941
	ENSMUSG00000014355.11	Anapc1	0.0192678	6.72349	0.364729	0.551889	0.814705
	ENSMUSG00000014361.6	Mertk	0.0290213	6.26955	0.362163	0.55328	0.815325
	ENSMUSG00000014402.16	Tsg101	0.108186	5.7012	15.4576	0.000681282	0.0418265
	ENSMUSG00000014418.17	Hps5	-0.0506662	5.54624	3.75082	0.0653462	0.324487
	ENSMUSG00000014426.10	Map3k4	0.0274358	5.48822	0.698554	0.411995	0.728089
	ENSMUSG00000014444.18	Piezo1	-0.00257258	7.70282	0.00448208	0.94721	0.983114
	ENSMUSG00000014453.5	Blk	-0.44768	3.80833	6.45979	0.0183513	0.181635
	ENSMUSG00000014470.5	Rnf166	-0.0386237	5.02816	1.18767	0.287252	0.623379
	ENSMUSG00000014496.9	Ankrd28	-0.0643175	4.73076	1.19686	0.285441	0.621928
	ENSMUSG00000014498.10	Ankrd52	-0.0472963	6.28042	1.37456	0.253206	0.592489
	ENSMUSG00000014503.16	Pkd2l2	0.142675	1.92056	1.53308	0.228323	0.569555
	ENSMUSG00000014504.17	Srp19	0.0533362	4.66113	1.20663	0.283534	0.619808
	ENSMUSG00000014547.11	Wdfy2	-0.0880917	5.24121	2.96812	0.0985397	0.394136
	ENSMUSG00000014550.15	Rbsn	-0.0414251	5.73217	1.31649	0.263191	0.601297
	ENSMUSG00000014551.9	Mrps25	0.162998	5.70482	7.23861	0.0131565	0.157581
	ENSMUSG00000014554.14	Dguok	-0.0269187	4.98471	0.532917	0.472861	0.768586
	ENSMUSG00000014592.22	Camta1	-0.0695129	4.06192	0.973493	0.334227	0.665526
	ENSMUSG00000014599.11	Csf1	-0.0423879	6.45706	0.649175	0.428781	0.739058
	ENSMUSG00000014601.14	Strip1	0.0262787	5.51249	0.691246	0.414415	0.730007
	ENSMUSG00000014602.16	Kif1a	-0.150884	3.90858	1.99951	0.17094	0.501176
	ENSMUSG00000014606.15	Slc25a11	-0.0134604	6.19053	0.113056	0.739785	0.905342
	ENSMUSG00000014633.16	Cmc2	0.0692535	3.01	1.00418	0.32688	0.659034
	ENSMUSG00000014668.16	Chfr	-0.00936354	5.18204	0.0782963	0.782157	0.922427
	ENSMUSG00000014686.9	Ceacam16	-0.510305	-0.475054	3.4128	0.0777878	0.352211
	ENSMUSG00000014704.11	Hoxa2	-0.241076	2.73911	8.96101	0.00655535	0.116405
	ENSMUSG00000014725.17	Adam28	-0.172636	3.99524	3.1463	0.0895374	0.374306
	ENSMUSG00000014748.14	Tex261	0.0173459	6.81188	0.347189	0.561537	0.820365
	ENSMUSG00000014763.9	Fam120b	-0.00482308	5.80095	0.0209821	0.886108	0.963314
	ENSMUSG00000014767.18	Tbp	0.042635	4.60888	0.808006	0.378161	0.701841
	ENSMUSG00000014769.11	Psmb1	0.0457878	6.4969	1.10907	0.303383	0.638001
	ENSMUSG00000014771.14	Pdcd2	-0.00650223	3.29332	0.0073751	0.932317	0.979002
	ENSMUSG00000014773.14	Dll1	0.232291	5.25897	3.50518	0.074137	0.343869
	ENSMUSG00000014776.8	Nol3	-0.0600037	4.65267	0.803076	0.379595	0.703199
	ENSMUSG00000014778.11	Fhod1	0.0799561	7.41805	2.41318	0.134171	0.450645
	ENSMUSG00000014786.9	Slc9a5	0.0994642	3.58121	2.13535	0.157664	0.484436
	ENSMUSG00000014791.11	Elmo3	0.0284999	5.09702	0.380972	0.543235	0.8102
	ENSMUSG00000014813.10	Stc1	0.325521	2.70943	6.60511	0.0172305	0.178231
	ENSMUSG00000014837.16	4931428F04Rik	-0.1429	2.41299	1.76167	0.197633	0.534909
	ENSMUSG00000014846.13	Tppp3	0.163724	8.53387	4.39805	0.0473414	0.276806
	ENSMUSG00000014850.16	Msh3	0.0166582	3.86448	0.109283	0.743999	0.90739
	ENSMUSG00000014856.13	Tmem208	0.0204698	4.72874	0.152022	0.70025	0.88615
	ENSMUSG00000014859.10	E2f4	0.0148723	5.69315	0.166776	0.686826	0.879894
	ENSMUSG00000014867.10	Surf4	0.0238176	7.47	0.60689	0.444019	0.749918
	ENSMUSG00000014873.16	Surf2	0.0741705	4.61648	4.05565	0.0560444	0.29931
	ENSMUSG00000014905.5	Dnajb9	0.00190679	5.25235	0.000353304	0.985168	0.996909
	ENSMUSG00000014907.11	Naf1	-0.0225695	3.88317	0.0965838	0.758808	0.913137
	ENSMUSG00000014932.16	Yes1	0.153448	5.13608	5.32563	0.0304995	0.22848
	ENSMUSG00000014956.16	Ppp1cb	0.0951509	7.13679	0.927424	0.345696	0.675684
	ENSMUSG00000014959.13	Gorasp2	0.000154782	6.74655	2.89556e-05	0.995754	0.99855
	ENSMUSG00000014980.15	Tsen15	0.0261536	3.82952	0.238946	0.629665	0.8525
	ENSMUSG00000015002.19	Efr3a	-0.0213986	6.0404	0.332394	0.569935	0.824171
	ENSMUSG00000015013.10	Trappc2l	0.100768	4.29083	2.88949	0.102844	0.400371
	ENSMUSG00000015016.9	Acsf3	-0.0773455	4.16485	2.35069	0.139069	0.456752
	ENSMUSG00000015023.8	Ddx19a	-0.0224656	5.43	0.488321	0.491786	0.779249
	ENSMUSG00000015027.12	Galns	-0.0129373	4.03827	0.0343791	0.854552	0.951684
	ENSMUSG00000015053.15	Gata2	0.086985	7.24665	1.75062	0.198993	0.536803
	ENSMUSG00000015083.12	C8g	-0.38329	0.388428	4.52658	0.0444779	0.269229
	ENSMUSG00000015085.9	Entpd2	-0.162326	3.45348	3.34965	0.0804028	0.358007
	ENSMUSG00000015087.15	Rabl6	0.00766499	6.31551	0.0609712	0.80719	0.931363
	ENSMUSG00000015092.10	Edf1	0.0524372	6.12461	0.788988	0.383736	0.706248
	ENSMUSG00000015093.16	Clic3	0.114085	7.03797	3.93487	0.059537	0.309719
	ENSMUSG00000015094.17	Npdc1	0.109776	6.26515	3.23706	0.0853199	0.366876
	ENSMUSG00000015095.13	Fbxw5	-0.0317338	5.96803	0.969081	0.335302	0.666756
	ENSMUSG00000015112.16	Slc25a13	-0.0426132	2.73837	0.265699	0.611223	0.843868
	ENSMUSG00000015120.16	Ube2i	-0.00993705	7.45835	0.0929237	0.763274	0.914581
	ENSMUSG00000015126.10	Tsr3	-0.0578738	3.63546	0.834181	0.37068	0.695831
	ENSMUSG00000015127.15	Unkl	-0.0399003	5.49566	1.32111	0.262378	0.600728
	ENSMUSG00000015133.18	Lrrk1	0.0318624	7.23727	0.85178	0.365771	0.691809
	ENSMUSG00000015134.16	Aldh1a3	-0.233644	0.775572	1.1709	0.290595	0.625553
	ENSMUSG00000015143.16	Actn1	0.0496238	7.34354	0.540441	0.469789	0.766512
	ENSMUSG00000015149.15	Sirt2	0.0387452	6.59097	1.07079	0.311683	0.64508
	ENSMUSG00000015165.17	Hnrnpl	0.0447109	7.91216	2.48087	0.129095	0.443199
	ENSMUSG00000015176.12	Nolc1	0.0514536	5.54136	2.48133	0.129061	0.44318
	ENSMUSG00000015189.13	Casd1	0.0503918	5.45875	0.604774	0.444805	0.75059
	ENSMUSG00000015202.14	Cnksr3	0.0609394	4.25311	1.31618	0.263246	0.601297
	ENSMUSG00000015214.15	Mtmr1	0.0386789	5.03169	0.733621	0.400678	0.719492
	ENSMUSG00000015217.12	Hmgb3	0.0165844	4.14236	0.0378954	0.847388	0.948656
	ENSMUSG00000015222.19	Map2	0.177036	3.11682	4.17765	0.0527508	0.29037
	ENSMUSG00000015224.11	Cyp2j9	0.0714531	3.29893	1.13145	0.298669	0.632988
	ENSMUSG00000015243.5	Abca1	0.0577918	5.77834	0.501039	0.48626	0.776153
	ENSMUSG00000015247.11	Nipsnap3b	0.0268801	4.07752	0.356382	0.556439	0.817036
	ENSMUSG00000015289.5	Lage3	0.0963825	4.02664	2.94593	0.0997329	0.396144
	ENSMUSG00000015290.16	Ubl4a	0.139462	5.54709	15.036	0.000778163	0.0452394
	ENSMUSG00000015291.11	Gdi1	0.0882319	7.80299	6.60597	0.017224	0.178231
	ENSMUSG00000015305.7	Sash1	0.000723148	7.52025	0.000310577	0.986094	0.996909
	ENSMUSG00000015312.10	Gadd45b	-0.200285	6.14322	7.89458	0.0100301	0.138639
	ENSMUSG00000015314.11	Slamf6	-0.466977	2.76211	11.3804	0.00265947	0.0802911
	ENSMUSG00000015316.12	Slamf1	-0.137372	1.04912	0.404964	0.530912	0.803253
	ENSMUSG00000015335.17	Zdhhc12	-0.0985337	3.68738	2.54504	0.124492	0.437365
	ENSMUSG00000015337.6	Endog	-0.145631	4.04186	1.68627	0.207151	0.54744
	ENSMUSG00000015340.11	Cybb	-0.0874173	6.69925	0.587643	0.451243	0.754537
	ENSMUSG00000015341.18	Golga7	0.0971785	6.27685	6.35477	0.0192119	0.184646
	ENSMUSG00000015342.7	Xk	-0.132076	1.35614	1.15203	0.29442	0.628842
	ENSMUSG00000015354.9	Pcolce2	0.0541629	8.33986	1.11695	0.30171	0.636024
	ENSMUSG00000015355.14	Cd48	-0.0979016	4.21926	1.35423	0.256644	0.595691
	ENSMUSG00000015357.11	Clpx	-0.0183804	5.25478	0.362728	0.552973	0.815136
	ENSMUSG00000015363.14	Trabd	-0.00805532	5.88562	0.0385739	0.846046	0.948334
	ENSMUSG00000015377.11	Dennd6b	-0.11355	4.25159	5.73152	0.025342	0.210071
	ENSMUSG00000015396.5	Cd83	0.00982626	4.33779	0.0137517	0.907681	0.971208
	ENSMUSG00000015405.16	Ace2	-0.0711952	4.19721	0.779629	0.386524	0.709141
	ENSMUSG00000015437.6	Gzmb	0.0738258	2.48924	0.208804	0.652056	0.862655
	ENSMUSG00000015451.17	C4a	0.0196098	0.646328	0.014881	0.903984	0.969646
	ENSMUSG00000015452.15	Ager	0.175771	10.9523	6.54603	0.0176768	0.17883
	ENSMUSG00000015461.16	Atf6b	-0.0306697	5.62236	0.465337	0.502053	0.785359
	ENSMUSG00000015467.15	Egfl8	0.315997	1.30944	7.36833	0.0124614	0.153133
	ENSMUSG00000015468.15	Notch4	0.141672	7.31415	3.37008	0.0795457	0.356317
	ENSMUSG00000015474.17	Ppt2	0.0075112	4.9674	0.0372666	0.848643	0.948925
	ENSMUSG00000015476.7	Prrt1	-0.305532	2.36942	8.04518	0.00943458	0.135188
	ENSMUSG00000015478.14	Rnf5	0.0176265	4.75255	0.155271	0.697232	0.885027
	ENSMUSG00000015488.15	Cacfd1	-0.0378414	5.6235	1.04292	0.317922	0.650891
	ENSMUSG00000015501.11	Hivep2	-0.0646157	5.83971	2.0057	0.170306	0.500116
	ENSMUSG00000015522.19	Arnt	-0.0325215	6.66125	1.30497	0.265232	0.603299
	ENSMUSG00000015533.10	Itga2	0.0946523	5.05577	2.8665	0.104143	0.402653
	ENSMUSG00000015536.15	Mocs2	0.0325073	5.25754	0.552192	0.465057	0.763928
	ENSMUSG00000015542.18	Nat9	-0.0505997	4.32457	0.907788	0.350754	0.679985
	ENSMUSG00000015568.17	Lpl	-0.255189	7.74221	5.80377	0.0245302	0.206174
	ENSMUSG00000015575.16	Atp6v0e	0.0304226	5.97424	0.574496	0.456287	0.75834
	ENSMUSG00000015597.18	Zfp318	-0.0606613	5.35022	1.42578	0.244803	0.585296
	ENSMUSG00000015599.10	Ttbk1	-0.416084	-0.299889	5.90106	0.0234826	0.204299
	ENSMUSG00000015605.7	Srf	0.345443	5.62482	28.9745	1.90226e-05	0.00489524
	ENSMUSG00000015619.11	Gata3	0.136762	3.93153	1.80313	0.192628	0.529178
	ENSMUSG00000015627.6	Gata5	0.0876706	4.16563	0.771638	0.388929	0.710795
	ENSMUSG00000015647.10	Lama5	-0.105113	8.09764	4.43614	0.0464717	0.274418
	ENSMUSG00000015652.10	Steap1	0.0604041	0.156109	0.101613	0.752822	0.91104
	ENSMUSG00000015653.14	Steap2	0.0401937	4.10722	0.390891	0.538076	0.807561
	ENSMUSG00000015656.18	Hspa8	0.256159	9.89339	9.89311	0.00458631	0.0988372
	ENSMUSG00000015659.13	Serac1	-0.00996944	2.93816	0.014637	0.90477	0.970009
	ENSMUSG00000015668.14	Pdzd11	0.0646514	4.63928	1.26731	0.272052	0.609623
	ENSMUSG00000015671.12	Psma2	0.0202191	6.12306	0.208435	0.652342	0.862843
	ENSMUSG00000015672.5	Mrpl32	0.0821501	4.10573	2.09246	0.161716	0.487819
	ENSMUSG00000015697.15	Setdb1	0.0137384	5.76634	0.158035	0.694692	0.883967
	ENSMUSG00000015702.14	Anxa9	-0.07622	2.9371	0.127461	0.724382	0.898176
	ENSMUSG00000015709.10	Arnt2	-0.0698454	0.517204	0.121981	0.73012	0.900981
	ENSMUSG00000015711.9	Prune1	0.00402876	5.12224	0.00751008	0.931702	0.978691
	ENSMUSG00000015714.12	Cers2	0.0953707	8.12047	8.37542	0.0082607	0.12658
	ENSMUSG00000015733.14	Capza2	0.0404967	6.88827	0.383652	0.541832	0.809349
	ENSMUSG00000015745.10	Plekho1	-0.107835	5.68165	3.8134	0.0633014	0.319963
	ENSMUSG00000015747.6	Vps45	0.0733564	3.63896	1.47766	0.236652	0.576283
	ENSMUSG00000015748.14	Prpf3	0.111665	4.81159	7.54636	0.0115727	0.147227
	ENSMUSG00000015749.13	Anp32e	0.0422872	6.59419	0.92571	0.346133	0.67578
	ENSMUSG00000015750.16	Aph1a	0.086474	7.08635	4.7905	0.0391896	0.255983
	ENSMUSG00000015755.17	Tab2	0.0159626	7.12871	0.255813	0.617895	0.847296
	ENSMUSG00000015757.11	Ppil4	0.0488804	5.5778	1.5872	0.220545	0.562174
	ENSMUSG00000015759.12	Cnih1	0.115346	5.46955	12.1748	0.00201079	0.0704907
	ENSMUSG00000015766.15	Eps8	-0.00171602	5.31758	0.00208146	0.96401	0.989779
	ENSMUSG00000015776.13	Med22	0.113922	5.96546	8.07228	0.00933159	0.134398
	ENSMUSG00000015790.17	Surf1	-0.0165463	5.32535	0.185138	0.671058	0.872404
	ENSMUSG00000015804.15	Med28	0.0711167	5.74551	4.32129	0.0491507	0.282088
	ENSMUSG00000015806.13	Qdpr	0.106519	5.42459	3.9133	0.0601865	0.311046
	ENSMUSG00000015829.14	Tnr	0.153595	0.268395	0.416587	0.525126	0.799893
	ENSMUSG00000015837.16	Sqstm1	-0.0421266	8.77251	0.929413	0.34519	0.675668
	ENSMUSG00000015839.7	Nfe2l2	0.130067	7.52033	11.5226	0.00252823	0.0788619
	ENSMUSG00000015843.11	Rxrg	-0.079523	0.818131	0.1768	0.678098	0.875522
	ENSMUSG00000015846.16	Rxra	-0.0201393	6.91895	0.176591	0.678277	0.875522
	ENSMUSG00000015850.12	Adamtsl4	0.151545	6.67748	2.35291	0.138891	0.456595
	ENSMUSG00000015852.14	Fcrls	-0.0389254	3.39716	0.16438	0.688957	0.880905
	ENSMUSG00000015869.18	Prpsap1	0.0272417	5.54102	0.334725	0.568595	0.824068
	ENSMUSG00000015880.14	Ncapg	-0.0271669	0.660799	0.010777	0.918232	0.974362
	ENSMUSG00000015882.19	Lcorl	-0.0447452	3.02719	0.14613	0.705822	0.88972
	ENSMUSG00000015889.9	Lta4h	0.0460905	6.01813	1.34599	0.258055	0.596676
	ENSMUSG00000015932.9	Dstn	0.182684	8.53592	23.7052	6.70729e-05	0.0113952
	ENSMUSG00000015937.16	Macroh2a1	-0.0731673	6.57303	4.26101	0.0506264	0.285648
	ENSMUSG00000015942.10	Gtf2ird2	-0.000713512	3.73339	0.000203967	0.98873	0.997399
	ENSMUSG00000015943.12	Bola1	-0.113845	3.28001	1.77232	0.196332	0.533882
	ENSMUSG00000015944.10	Castor2	-0.122801	5.66035	2.64561	0.117661	0.427523
	ENSMUSG00000015947.11	Fcgr1	-0.142258	2.4475	2.08894	0.162055	0.488341
	ENSMUSG00000015950.14	Ncf1	-0.275761	5.35739	12.5351	0.00177559	0.0664424
	ENSMUSG00000015957.13	Wnt11	-0.17938	3.64759	3.60295	0.0704851	0.33539
	ENSMUSG00000015961.9	Adss	0.0142339	6.05217	0.179738	0.675595	0.874297
	ENSMUSG00000015966.18	Il17rb	-0.554488	0.920634	15.2095	0.000736592	0.0442942
	ENSMUSG00000015968.19	Cacna1d	-0.0679916	5.86456	1.60589	0.217938	0.559602
	ENSMUSG00000015970.20	Chdh	-0.180731	2.18081	1.35832	0.255949	0.595433
	ENSMUSG00000015971.6	Actr8	-0.060172	5.45172	4.08062	0.0553515	0.297572
	ENSMUSG00000015980.15	Lrrc27	0.025869	2.04306	0.0557404	0.81548	0.934727
	ENSMUSG00000015981.13	Stk32c	-0.213795	0.528164	2.24766	0.147617	0.469494
	ENSMUSG00000015994.11	Fnta	0.0558524	6.09392	3.05091	0.0942321	0.384285
	ENSMUSG00000016018.5	Mtrex	0.00249527	5.94988	0.00473895	0.945721	0.98273
	ENSMUSG00000016024.10	Lbp	-0.0836646	6.05882	1.33319	0.260267	0.598713
	ENSMUSG00000016028.12	Celsr1	-0.149606	5.8024	21.9946	0.000104358	0.0147271
	ENSMUSG00000016087.14	Fli1	-0.0637979	4.92776	0.920691	0.347419	0.676776
	ENSMUSG00000016128.15	Stard13	0.0493135	7.52862	1.71211	0.203827	0.542721
	ENSMUSG00000016181.11	Utp25	-0.0918444	3.89913	4.01917	0.0570742	0.301917
	ENSMUSG00000016194.15	Hsd11b1	0.0589628	7.75298	0.647863	0.429241	0.739591
	ENSMUSG00000016200.15	Syt14	0.302468	0.490149	2.85226	0.104958	0.404018
	ENSMUSG00000016206.7	H2-M3	0.0203838	4.48914	0.102556	0.751717	0.910443
	ENSMUSG00000016239.12	Lonrf3	-0.107107	1.3416	0.539362	0.470228	0.766944
	ENSMUSG00000016252.8	Atp5e	0.0578745	6.24982	0.659549	0.425167	0.736051
	ENSMUSG00000016253.13	Nelfcd	-0.0554695	5.22856	2.13359	0.157828	0.484436
	ENSMUSG00000016255.6	Tubb1	0.291517	3.37806	1.65885	0.210754	0.551382
	ENSMUSG00000016256.11	Ctsz	-0.0464173	7.03823	0.609002	0.443238	0.749322
	ENSMUSG00000016257.16	Prelid3b	0.121961	4.63787	8.2478	0.00869407	0.130032
	ENSMUSG00000016262.15	Sertad4	0.311225	2.45219	10.2701	0.00398348	0.0940715
	ENSMUSG00000016283.14	H2-M2	-0.0728622	1.15949	0.160933	0.692056	0.882803
	ENSMUSG00000016308.14	Ube2a	0.158172	4.45952	4.78765	0.0392428	0.256017
	ENSMUSG00000016319.4	Slc25a5	0.0295213	7.53023	0.667198	0.422533	0.7356
	ENSMUSG00000016344.15	Ppdpf	0.0149682	5.41884	0.114401	0.738302	0.904617
	ENSMUSG00000016349.11	Eef1a2	-0.443642	3.41716	1.43889	0.242708	0.582914
	ENSMUSG00000016356.19	Col20a1	-0.0744931	2.50613	0.887926	0.355976	0.684986
	ENSMUSG00000016382.16	Pls3	0.129855	8.01732	8.54356	0.00772569	0.123238
	ENSMUSG00000016386.16	Mpped2	0.0496483	1.91514	0.302737	0.587554	0.833193
	ENSMUSG00000016409.5	Nkap	0.0237906	4.4205	0.20795	0.652718	0.862844
	ENSMUSG00000016427.8	Ndufa1	0.0281206	4.52918	0.211459	0.650007	0.861887
	ENSMUSG00000016458.16	Wt1	-0.0508977	1.83144	0.119494	0.732772	0.902466
	ENSMUSG00000016477.19	E2f3	0.0773253	3.46657	0.810491	0.377442	0.701577
	ENSMUSG00000016481.16	Cr1l	0.0341359	6.58148	1.01217	0.325005	0.65696
	ENSMUSG00000016487.16	Ppfibp1	0.014094	7.09929	0.126241	0.725647	0.89898
	ENSMUSG00000016493.14	Cd46	-0.275013	2.93379	6.54951	0.0176501	0.17881
	ENSMUSG00000016494.10	Cd34	0.0273981	7.84907	0.259069	0.61568	0.846663
	ENSMUSG00000016495.13	Plgrkt	-0.0280009	5.54735	0.589517	0.450531	0.754147
	ENSMUSG00000016496.8	Cd274	-0.284208	5.38814	3.97981	0.0582091	0.305779
	ENSMUSG00000016498.11	Pdcd1lg2	-0.455908	-0.0714254	4.89714	0.0372568	0.250103
	ENSMUSG00000016503.19	Gtf3a	-0.0135478	4.59525	0.0861241	0.771834	0.918111
	ENSMUSG00000016510.12	Mtif3	-0.0327414	4.15971	0.284448	0.598992	0.838967
	ENSMUSG00000016520.8	Lnx2	0.242379	5.58073	38.7475	2.53423e-06	0.00113709
	ENSMUSG00000016526.9	Dyrk3	-0.134005	2.44587	1.46772	0.238185	0.578583
	ENSMUSG00000016528.11	Mapkapk2	0.102076	7.33081	8.62654	0.00747586	0.121354
	ENSMUSG00000016534.16	Lamp2	0.0318536	7.7477	0.104567	0.749382	0.909291
	ENSMUSG00000016541.11	Atxn10	0.123703	7.21922	13.071	0.00147974	0.061359
	ENSMUSG00000016552.14	Foxred2	-0.224388	2.34448	4.26032	0.0506438	0.285648
	ENSMUSG00000016554.10	Eif3d	0.0411024	6.21519	1.08876	0.307748	0.641499
	ENSMUSG00000016559.15	H3f3b	-0.116006	8.72913	6.64254	0.0169543	0.177124
	ENSMUSG00000016619.11	Nup50	0.0616699	5.56445	5.10656	0.0337647	0.239419
	ENSMUSG00000016624.16	Phf21b	-0.330834	1.49864	6.66944	0.0167588	0.176557
	ENSMUSG00000016637.8	Ift27	0.0405215	4.06173	0.563827	0.460448	0.760637
	ENSMUSG00000016664.17	Pacsin2	0.0232893	7.38989	0.457562	0.50561	0.78758
	ENSMUSG00000016756.18	Cmah	-0.283879	4.46287	20.9958	0.000136238	0.0172756
	ENSMUSG00000016757.12	Ttll12	-0.0363343	4.4351	0.596763	0.447797	0.752882
	ENSMUSG00000016758.5	Bik	-0.153462	3.20327	2.75657	0.110629	0.414984
	ENSMUSG00000016763.16	Scube1	-0.0409983	5.05123	0.586722	0.451594	0.754759
	ENSMUSG00000016831.13	Tox4	0.063658	6.45178	5.10417	0.0338024	0.239419
	ENSMUSG00000016833.15	Mrps18c	0.032706	3.74788	0.431764	0.517742	0.795612
	ENSMUSG00000016918.16	Sulf1	-0.00155457	5.97002	0.000761219	0.97823	0.995382
	ENSMUSG00000016921.15	Srsf6	0.0783933	7.63114	2.49563	0.128018	0.441667
	ENSMUSG00000016933.18	Plcg1	0.0296843	7.80179	0.599766	0.446672	0.751854
	ENSMUSG00000016940.19	Kctd2	-0.0760923	5.88995	2.88249	0.103238	0.40119
	ENSMUSG00000016946.7	Kctd5	0.0585214	4.97656	2.76643	0.110029	0.413796
	ENSMUSG00000016984.8	Etaa1	-0.109298	3.41484	1.18416	0.287947	0.624071
	ENSMUSG00000016995.18	Matn4	0.161967	6.1465	3.92663	0.0597841	0.310342
	ENSMUSG00000017002.15	Slpi	0.0302123	4.61964	0.00251846	0.960415	0.988648
	ENSMUSG00000017007.10	Rbpjl	0.175877	6.53766	5.5379	0.0276694	0.218496
	ENSMUSG00000017009.4	Sdc4	0.0789134	7.55098	5.63795	0.0264382	0.214286
	ENSMUSG00000017057.10	Il13ra1	-0.00111799	5.50299	0.000109627	0.991738	0.997954
	ENSMUSG00000017119.21	Nbr1	0.0485195	7.48189	2.17948	0.153622	0.478587
	ENSMUSG00000017132.18	Cyth1	-0.0368684	5.7563	1.27899	0.269912	0.607583
	ENSMUSG00000017144.9	Rnd3	-0.120136	4.74325	3.75992	0.0650443	0.324181
	ENSMUSG00000017146.13	Brca1	-0.328052	1.15049	3.3303	0.0812242	0.359053
	ENSMUSG00000017167.7	Cntnap1	-0.103533	2.93184	1.59315	0.21971	0.561435
	ENSMUSG00000017176.18	Nt5c3b	-0.0386031	4.49218	0.475898	0.49729	0.782561
	ENSMUSG00000017188.4	Coa3	0.0433914	5.27205	0.685076	0.416475	0.731422
	ENSMUSG00000017210.15	Med24	-0.0777663	5.45314	4.22035	0.0516503	0.288119
	ENSMUSG00000017221.15	Psmd3	-0.0423622	6.54563	1.72056	0.202753	0.541202
	ENSMUSG00000017264.17	Exosc10	-0.00200302	5.78575	0.00371324	0.951944	0.985451
	ENSMUSG00000017286.16	Glod4	0.0444037	5.63315	0.300893	0.588687	0.834056
	ENSMUSG00000017288.16	Vps53	0.00810975	5.21372	0.0317821	0.860091	0.953543
	ENSMUSG00000017291.14	Taok1	0.0566565	6.21008	0.505176	0.484485	0.775238
	ENSMUSG00000017299.14	Dnttip1	0.042028	4.11284	0.761513	0.392007	0.712551
	ENSMUSG00000017307.17	Acot8	-0.110157	3.59455	4.07063	0.0556275	0.298356
	ENSMUSG00000017309.12	Cd300lg	-0.361274	4.76299	5.60239	0.0268686	0.215577
	ENSMUSG00000017314.13	Mpp2	0.115337	4.40434	4.67527	0.0414061	0.261681
	ENSMUSG00000017344.5	Vtn	0.127516	4.76754	4.40945	0.0470792	0.275808
	ENSMUSG00000017376.16	Nlk	0.0554738	5.26679	1.15378	0.294062	0.628839
	ENSMUSG00000017386.11	Traf4	0.17243	4.35682	10.1363	0.00418686	0.0956472
	ENSMUSG00000017390.16	Aldoc	-0.0617967	3.04834	0.579829	0.45423	0.756994
	ENSMUSG00000017400.11	Stac2	-0.425287	1.4589	8.88869	0.00674327	0.11761
	ENSMUSG00000017404.13	Rpl19	-0.0124891	8.68661	0.0480209	0.828505	0.940574
	ENSMUSG00000017405.15	Nek8	-0.0143648	3.94638	0.0637419	0.802952	0.929966
	ENSMUSG00000017412.16	Cacnb4	-0.138209	0.525214	0.976831	0.333417	0.665035
	ENSMUSG00000017417.15	Plxdc1	0.0832098	4.70834	3.06585	0.0934781	0.382235
	ENSMUSG00000017418.15	Arl5b	0.256884	5.13277	13.2589	0.00138913	0.0597628
	ENSMUSG00000017421.19	Zfp207	-0.00828116	6.95189	0.0331314	0.857185	0.952504
	ENSMUSG00000017428.17	Psmd11	0.0318198	6.06218	1.1046	0.304337	0.638228
	ENSMUSG00000017446.15	C1qtnf1	-0.0659887	5.46017	1.10694	0.303836	0.638001
	ENSMUSG00000017453.5	Pipox	-0.239422	0.792656	2.48056	0.129118	0.443199
	ENSMUSG00000017466.10	ENSMUSG00000017466.10	0.0194833	9.66912	0.387526	0.539816	0.808625
	ENSMUSG00000017478.16	Zc3h18	-0.0389303	6.17769	2.1176	0.159326	0.485553
	ENSMUSG00000017485.12	Top2b	-0.0324488	6.90682	0.80085	0.380245	0.70356
	ENSMUSG00000017491.10	Rarb	-0.0824827	2.46609	0.268259	0.609521	0.843068
	ENSMUSG00000017493.13	Igfbp4	-0.180146	7.94825	12.1137	0.00205394	0.0711727
	ENSMUSG00000017499.16	Cdc6	-0.275311	1.20313	3.64231	0.0690735	0.332522
	ENSMUSG00000017548.16	Suz12	-0.0114645	5.46297	0.0339247	0.855505	0.95206
	ENSMUSG00000017550.15	Atad5	-0.145634	2.20392	1.77924	0.195492	0.533185
	ENSMUSG00000017561.17	Crlf3	0.0679899	5.77919	2.69948	0.114184	0.421274
	ENSMUSG00000017607.10	Tns4	-0.276542	1.42412	1.36718	0.254447	0.593572
	ENSMUSG00000017615.13	Tnfaip1	0.188194	7.69968	30.5866	1.32903e-05	0.00380185
	ENSMUSG00000017631.20	Abr	-0.0371322	6.78176	1.50384	0.232671	0.572242
	ENSMUSG00000017639.14	Rab11fip4	-0.206728	4.51478	4.6778	0.041356	0.261681
	ENSMUSG00000017652.17	Cd40	0.0550351	4.17886	0.873591	0.359815	0.687658
	ENSMUSG00000017664.17	Slc35c2	-0.0605172	5.04032	1.9055	0.180928	0.515137
	ENSMUSG00000017667.10	Zfp334	0.0152861	4.21067	0.0921147	0.764274	0.914839
	ENSMUSG00000017670.17	Elmo2	0.0255311	6.66231	0.451884	0.508237	0.789191
	ENSMUSG00000017677.12	Wsb1	0.0284153	6.63633	0.318372	0.578129	0.829123
	ENSMUSG00000017679.17	Ttpal	0.166469	5.37111	10.6797	0.00342546	0.0888031
	ENSMUSG00000017686.18	Rhot1	0.0429444	5.71801	0.805781	0.378807	0.702719
	ENSMUSG00000017692.9	Rhbdl3	-0.0615285	2.73891	0.327917	0.572525	0.826415
	ENSMUSG00000017697.4	Ada	-0.105424	3.21694	0.0151168	0.90323	0.969454
	ENSMUSG00000017707.10	Serinc3	-0.0314386	9.82679	0.163096	0.690107	0.881731
	ENSMUSG00000017713.10	Tha1	-0.186621	3.03575	3.61716	0.0699718	0.33418
	ENSMUSG00000017715.12	Pgs1	0.0207117	6.34702	0.179633	0.675684	0.874334
	ENSMUSG00000017716.16	Birc5	0.0511454	1.96449	0.0654182	0.800436	0.92877
	ENSMUSG00000017718.16	Afmid	-0.090675	2.51792	0.802247	0.379837	0.70321
	ENSMUSG00000017721.16	Pigt	-0.040191	6.13054	1.35965	0.255723	0.595223
	ENSMUSG00000017723.12	Wfdc2	-0.126242	8.88961	4.18614	0.0525298	0.290203
	ENSMUSG00000017734.16	Dbndd2	0.0766126	5.47487	3.76017	0.0650362	0.324181
	ENSMUSG00000017737.3	Mmp9	-0.455257	4.06869	5.9868	0.0226005	0.19964
	ENSMUSG00000017740.18	Slc12a5	-0.291437	3.46783	2.68109	0.115357	0.422751
	ENSMUSG00000017747.14	Ghdc	-0.0442089	4.38574	0.569124	0.458374	0.760104
	ENSMUSG00000017754.14	Pltp	0.000400275	9.03086	8.80124e-05	0.992597	0.998068
	ENSMUSG00000017756.10	Slc12a7	-0.136102	6.63621	5.04529	0.0347469	0.242438
	ENSMUSG00000017760.17	Ctsa	-0.0107942	7.56806	0.0848455	0.773484	0.918691
	ENSMUSG00000017764.3	Zswim1	-0.00726711	3.57287	0.0168831	0.897764	0.96778
	ENSMUSG00000017765.18	Slc12a4	0.125718	6.53517	9.56549	0.00519227	0.104436
	ENSMUSG00000017774.20	Myo1c	0.108853	8.95401	8.93756	0.00661564	0.116405
	ENSMUSG00000017776.16	Crk	0.128842	7.31123	5.0682	0.0343758	0.241501
	ENSMUSG00000017778.15	Cox7c	0.048306	5.66518	0.801022	0.380195	0.70356
	ENSMUSG00000017781.18	Pitpna	0.0310344	7.3535	1.05132	0.316022	0.648917
	ENSMUSG00000017801.16	Mlx	0.109522	4.90679	7.71276	0.0108051	0.142711
	ENSMUSG00000017802.15	Retreg3	0.00560804	6.63179	0.0393887	0.84445	0.947792
	ENSMUSG00000017817.12	Jph2	-0.0667171	5.17611	0.711136	0.407879	0.724288
	ENSMUSG00000017830.16	Dhx58	-0.0882242	3.90048	1.22042	0.280868	0.617295
	ENSMUSG00000017831.9	Rab5a	0.0648313	6.09476	3.42811	0.0771687	0.350747
	ENSMUSG00000017837.13	Nkiras2	-0.00513044	5.15472	0.0158305	0.900984	0.968878
	ENSMUSG00000017843.15	Ppp2r5c	0.00949369	6.91097	0.148754	0.703325	0.887956
	ENSMUSG00000017858.13	Ift52	-0.00656668	5.22819	0.0255013	0.874539	0.959429
	ENSMUSG00000017861.12	Mybl2	-0.0876697	1.86983	0.867523	0.361458	0.688758
	ENSMUSG00000017897.19	Eya2	-0.0860745	5.40097	3.30614	0.0822629	0.361632
	ENSMUSG00000017929.14	B4galt5	-0.0495052	5.33399	0.520727	0.477911	0.770708
	ENSMUSG00000017969.14	Ptgis	-0.00817825	6.281	0.0098739	0.92172	0.975183
	ENSMUSG00000017978.19	Cadps2	0.181648	5.23763	14.5928	0.000896533	0.0483087
	ENSMUSG00000017999.17	Ddx27	-0.0692544	4.94438	2.81581	0.107077	0.409039
	ENSMUSG00000018001.19	Cyth3	0.132313	8.25773	8.98726	0.00648858	0.115936
	ENSMUSG00000018008.9	Cyth4	-0.232382	5.83367	10.3187	0.00391236	0.0937381
	ENSMUSG00000018012.12	Rac3	0.151876	4.18447	7.86947	0.0101334	0.139187
	ENSMUSG00000018040.10	Rrp7a	0.056815	5.63072	2.12467	0.158661	0.485065
	ENSMUSG00000018042.19	Cyb5r3	0.0175272	8.59007	0.106743	0.746882	0.908323
	ENSMUSG00000018068.14	Ints2	-0.144633	3.48717	5.69289	0.0257883	0.212262
	ENSMUSG00000018076.13	Med13l	-0.086544	6.09048	2.7038	0.11391	0.421242
	ENSMUSG00000018102.6	H2bc4	0.214062	5.73285	6.67572	0.0167134	0.176557
	ENSMUSG00000018126.16	Baiap2l2	-0.367228	-0.385633	2.02256	0.168595	0.49789
	ENSMUSG00000018143.11	Mafk	0.285051	6.46296	26.3432	3.50578e-05	0.00739127
	ENSMUSG00000018160.16	Med1	0.0154689	5.69612	0.126631	0.725241	0.898796
	ENSMUSG00000018166.9	Erbb3	0.043438	6.42853	0.470966	0.499504	0.784134
	ENSMUSG00000018167.11	Stard3	0.0563526	5.88485	1.90456	0.181031	0.515137
	ENSMUSG00000018168.9	Ikzf3	-0.495393	4.11827	10.8003	0.00327799	0.0869115
	ENSMUSG00000018169.13	Mfng	0.0622615	5.40771	3.64118	0.0691136	0.332623
	ENSMUSG00000018171.10	Vmp1	-0.0373319	6.39257	0.34887	0.560597	0.819677
	ENSMUSG00000018189.13	Uchl5	-0.0705294	3.53875	0.873182	0.359925	0.687658
	ENSMUSG00000018196.19	Glrx2	-0.0272165	4.75199	0.233702	0.633429	0.854354
	ENSMUSG00000018199.10	Ro60	0.106875	4.94541	1.1952	0.285768	0.621948
	ENSMUSG00000018209.16	Stk4	0.0766631	7.45738	3.02198	0.095712	0.387431
	ENSMUSG00000018217.13	Pmp22	0.146999	9.17075	11.0842	0.00295759	0.0826755
	ENSMUSG00000018238.7	Gdf9	0.0802565	-0.00209705	0.228537	0.637189	0.855763
	ENSMUSG00000018239.10	Zcchc10	0.111752	2.77457	2.9357	0.100288	0.396508
	ENSMUSG00000018263.12	Tbx5	0.0477795	5.89632	0.507165	0.483636	0.77452
	ENSMUSG00000018286.7	Psmb6	0.0241284	6.2879	0.266631	0.610602	0.843658
	ENSMUSG00000018287.13	Spag7	0.0622179	5.377	1.9299	0.178268	0.510998
	ENSMUSG00000018293.5	Pfn1	-0.0131136	8.2852	0.0861489	0.771802	0.918111
	ENSMUSG00000018322.11	Tomm34	-0.013857	5.42329	0.159539	0.69332	0.883061
	ENSMUSG00000018326.10	Ywhab	0.051999	8.30362	2.49532	0.128041	0.441667
	ENSMUSG00000018334.19	Ksr1	-0.0319637	5.07563	0.401901	0.532456	0.804269
	ENSMUSG00000018339.13	Gpx3	0.044882	10.0261	0.275663	0.604656	0.84151
	ENSMUSG00000018340.14	Anxa6	0.0740311	8.00465	2.07653	0.163254	0.490486
	ENSMUSG00000018341.13	Il12rb2	-0.219996	1.06776	2.29838	0.143333	0.463334
	ENSMUSG00000018347.17	Zkscan6	0.0513583	3.98038	1.13888	0.297125	0.631299
	ENSMUSG00000018362.15	Kpna2	0.231891	5.11121	13.3248	0.00135881	0.0597628
	ENSMUSG00000018363.17	Smurf2	0.0665445	7.13022	1.69025	0.206634	0.546868
	ENSMUSG00000018372.14	Cep95	0.00783049	3.96179	0.0139072	0.907163	0.971111
	ENSMUSG00000018377.11	Vezf1	0.0642858	6.85396	4.22957	0.0514161	0.287381
	ENSMUSG00000018378.14	Cuedc1	-0.0937544	5.97008	3.09808	0.0918758	0.379183
	ENSMUSG00000018379.18	Srsf1	0.0166687	7.5603	0.0813912	0.778012	0.920267
	ENSMUSG00000018381.16	Abi3	0.0279814	6.00291	0.226697	0.638541	0.856626
	ENSMUSG00000018387.13	Shroom1	0.107427	2.52489	1.17754	0.289264	0.624609
	ENSMUSG00000018395.20	Kif3a	-0.020932	4.60288	0.185892	0.670431	0.872362
	ENSMUSG00000018398.19	Septin8	-0.00176797	6.98222	0.00159065	0.968536	0.991392
	ENSMUSG00000018401.18	Mtmr4	-0.03955	5.87479	0.603821	0.445159	0.750602
	ENSMUSG00000018405.8	Mrm1	-0.095892	3.23621	2.36277	0.138106	0.455453
	ENSMUSG00000018411.18	Mapt	0.04532	7.91844	0.588642	0.450864	0.754224
	ENSMUSG00000018412.17	Kansl1	-0.0465824	6.55399	2.06429	0.164447	0.492497
	ENSMUSG00000018415.15	Gid4	0.0615476	6.40668	1.66682	0.209699	0.550221
	ENSMUSG00000018417.15	Myo1b	0.0800878	8.32491	4.89694	0.0372603	0.250103
	ENSMUSG00000018425.19	Dhx40	0.0331507	5.70594	0.539451	0.470192	0.766944
	ENSMUSG00000018427.9	Ypel2	-0.07118	4.83015	1.76258	0.19752	0.534909
	ENSMUSG00000018428.16	Akap1	-0.0294235	5.36832	0.296815	0.591207	0.835007
	ENSMUSG00000018433.15	Nol11	-0.0173642	4.52019	0.180051	0.67533	0.874221
	ENSMUSG00000018442.14	Derl2	0.0276745	5.62106	0.537116	0.471143	0.767504
	ENSMUSG00000018446.9	C1qbp	0.000304117	4.83429	5.56937e-05	0.994111	0.998097
	ENSMUSG00000018449.13	Rpain	0.0366954	3.73791	0.391621	0.5377	0.807561
	ENSMUSG00000018451.8	6330403K07Rik	-0.144228	1.80896	1.40852	0.247593	0.587237
	ENSMUSG00000018459.16	Slc13a3	0.0809728	2.21255	0.34416	0.563236	0.821231
	ENSMUSG00000018470.9	Kcnab3	-0.157585	0.364882	0.747777	0.396242	0.71581
	ENSMUSG00000018474.19	Chd3	-0.0709604	7.89076	2.73264	0.112103	0.418183
	ENSMUSG00000018476.8	Kdm6b	0.0624443	6.73676	1.34334	0.258512	0.596829
	ENSMUSG00000018481.10	Appbp2	0.110194	5.69396	6.56482	0.0175334	0.17881
	ENSMUSG00000018500.3	Adora2b	0.0905752	3.35861	1.05292	0.315664	0.64841
	ENSMUSG00000018501.18	Ncor1	-0.0147834	7.18404	0.20324	0.656402	0.86497
	ENSMUSG00000018507.17	Trpv2	-0.0264518	4.38003	0.267076	0.610306	0.843612
	ENSMUSG00000018509.9	Cenpv	-0.0711354	2.77906	0.848778	0.366602	0.692483
	ENSMUSG00000018537.17	Pcgf2	0.0156964	5.04589	0.196581	0.661698	0.868581
	ENSMUSG00000018541.11	Cwc25	0.131133	4.78878	18.1467	0.000302652	0.0271595
	ENSMUSG00000018547.9	Pip4k2b	-0.0155866	5.77895	0.260018	0.615037	0.846245
	ENSMUSG00000018548.16	Trim37	0.0260446	4.8015	0.226363	0.638788	0.856684
	ENSMUSG00000018554.14	Ybx2	-0.313979	0.807637	2.10582	0.160441	0.486503
	ENSMUSG00000018559.17	Ctdnep1	0.0667475	6.07147	2.64319	0.11782	0.427924
	ENSMUSG00000018565.18	Elp5	0.075825	4.67207	2.72654	0.112483	0.418497
	ENSMUSG00000018566.15	Slc2a4	-0.208892	3.37481	0.459544	0.5047	0.786932
	ENSMUSG00000018567.15	Gabarap	0.0514739	7.84631	2.28923	0.144095	0.46447
	ENSMUSG00000018569.13	Cldn7	0.135959	5.06381	4.96144	0.0361432	0.246673
	ENSMUSG00000018570.18	2810408A11Rik	0.0167045	0.886878	0.0105768	0.918992	0.974362
	ENSMUSG00000018572.11	Phf23	0.190444	5.67279	12.7898	0.0016276	0.0640031
	ENSMUSG00000018574.15	Acadvl	-0.0743935	6.35897	1.27352	0.270911	0.608792
	ENSMUSG00000018581.16	Dnah11	0.0138706	4.29877	0.0172713	0.896602	0.967303
	ENSMUSG00000018583.6	G3bp1	-0.0205689	6.82862	0.588652	0.45086	0.754224
	ENSMUSG00000018585.10	Atox1	-0.01043	5.29595	0.021051	0.885923	0.963314
	ENSMUSG00000018593.14	Sparc	0.15093	10.5304	4.09212	0.0550359	0.296742
	ENSMUSG00000018599.6	Mief2	-0.064669	4.0733	2.52935	0.125599	0.438569
	ENSMUSG00000018604.19	Tbx3	-0.0909315	7.3091	2.46525	0.130246	0.444712
	ENSMUSG00000018648.16	Dusp14	-0.0496653	5.24329	0.680326	0.418071	0.732295
	ENSMUSG00000018651.15	Tada2a	-0.0517534	3.87788	1.33893	0.259272	0.597513
	ENSMUSG00000018654.19	Ikzf1	-0.235284	5.35879	6.23861	0.0202162	0.190181
	ENSMUSG00000018659.13	Pnpo	-0.00520218	4.70725	0.0135028	0.908516	0.97124
	ENSMUSG00000018661.18	Cog1	0.0219617	5.72352	0.374396	0.546707	0.811918
	ENSMUSG00000018666.14	Cbx1	0.00510846	5.93101	0.0411448	0.841069	0.946052
	ENSMUSG00000018669.15	Cdk5rap3	-0.0657617	5.11888	2.12996	0.158166	0.484436
	ENSMUSG00000018672.16	Copz2	0.101059	4.49938	2.57628	0.122321	0.433474
	ENSMUSG00000018677.10	Slc25a39	0.0716547	6.2245	1.5749	0.222284	0.564337
	ENSMUSG00000018678.14	Sp2	-0.088589	5.27152	7.72389	0.0107558	0.14248
	ENSMUSG00000018697.15	Aatf	-0.114585	3.78948	3.72276	0.0662875	0.325895
	ENSMUSG00000018707.14	Dync1h1	0.0125203	8.4961	0.118422	0.733924	0.903
	ENSMUSG00000018733.11	Pex12	-0.149235	3.47378	4.85846	0.0379453	0.252761
	ENSMUSG00000018736.15	Ndel1	0.135468	6.18316	17.1279	0.000408645	0.0323569
	ENSMUSG00000018740.15	Slc25a35	-0.085282	4.84623	2.67716	0.11561	0.423411
	ENSMUSG00000018750.15	Zbtb4	0.0828351	8.38382	5.96647	0.0228063	0.200546
	ENSMUSG00000018752.20	Tnfsfm13	0.0318803	4.51943	0.284422	0.599009	0.838967
	ENSMUSG00000018761.15	Mpdu1	0.0521859	5.01848	1.04306	0.317889	0.650891
	ENSMUSG00000018765.7	Fxr2	0.0314024	6.47981	0.742913	0.397757	0.716683
	ENSMUSG00000018770.10	Atp5g3	-0.0114766	6.58112	0.0586226	0.810864	0.932814
	ENSMUSG00000018774.14	Cd68	-0.0994292	5.58766	1.4866	0.235282	0.575506
	ENSMUSG00000018776.11	Slc35g3	-0.207941	0.619146	0.92494	0.34633	0.675859
	ENSMUSG00000018796.14	Acsl1	-0.100884	6.42763	0.56865	0.458559	0.760104
	ENSMUSG00000018800.15	Abca5	0.0608164	5.44792	0.450448	0.508905	0.78941
	ENSMUSG00000018809.3	Smyd4	-0.118569	3.34325	3.82101	0.0630576	0.319192
	ENSMUSG00000018819.11	Lsp1	-0.104838	7.0828	2.03689	0.167156	0.49669
	ENSMUSG00000018820.14	Zfyve27	-0.0108061	6.00499	0.140114	0.711647	0.891872
	ENSMUSG00000018821.4	Avpi1	0.0788673	5.08247	2.96262	0.0988337	0.394627
	ENSMUSG00000018822.8	Sfrp5	-0.55399	0.432958	1.15195	0.294435	0.628842
	ENSMUSG00000018830.11	Myh11	-0.123301	7.15768	1.32825	0.261128	0.599275
	ENSMUSG00000018841.18	Rad51d	-0.106166	4.07436	3.35172	0.0803152	0.357816
	ENSMUSG00000018845.15	Unc45b	-0.0505773	5.58668	0.660317	0.424902	0.736051
	ENSMUSG00000018846.9	Pank3	0.140195	5.86178	6.1124	0.0213742	0.194445
	ENSMUSG00000018848.5	Rars	0.0158853	5.20596	0.1542	0.698222	0.885376
	ENSMUSG00000018849.7	Wwc1	0.111549	8.00376	5.9037	0.0234548	0.204297
	ENSMUSG00000018858.16	Mrpl58	-0.00381256	4.81217	0.00618647	0.937998	0.980522
	ENSMUSG00000018861.9	Fdxr	-0.123817	3.06851	4.2399	0.0511551	0.286967
	ENSMUSG00000018868.5	Pnpla5	-0.181719	0.115056	1.44264	0.242115	0.582601
	ENSMUSG00000018882.13	Mrpl45	0.000590825	4.26054	0.000152223	0.990264	0.997779
	ENSMUSG00000018893.16	Mb	-0.607378	6.07211	2.2693	0.145771	0.466847
	ENSMUSG00000018899.18	Irf1	-0.147643	7.14072	3.47024	0.0754941	0.346829
	ENSMUSG00000018900.8	Slc22a5	-0.0125231	5.36183	0.050743	0.823794	0.938782
	ENSMUSG00000018906.15	P4ha2	0.0467972	5.70116	0.46931	0.500251	0.784681
	ENSMUSG00000018909.16	Arrb1	-0.0630516	8.91538	2.02882	0.167964	0.497243
	ENSMUSG00000018916.6	Csf2	-0.255278	0.718044	2.24835	0.147558	0.469391
	ENSMUSG00000018920.12	Cxcl16	0.19327	6.29176	15.9684	0.000581191	0.0391164
	ENSMUSG00000018921.12	Pelp1	-0.0480485	4.78766	1.40132	0.24877	0.588123
	ENSMUSG00000018923.14	Med11	0.101626	4.31298	1.52533	0.229466	0.570454
	ENSMUSG00000018924.7	Alox15	-0.528603	1.34082	2.19468	0.152258	0.476743
	ENSMUSG00000018927.4	Ccl6	-0.228478	6.86212	2.30271	0.142975	0.462888
	ENSMUSG00000018930.4	Ccl4	-0.343139	-0.108821	2.77752	0.109358	0.412781
	ENSMUSG00000018931.4	Natd1	0.0282694	5.31975	0.616847	0.440355	0.747625
	ENSMUSG00000018932.10	Map2k3	0.045532	6.19257	1.51332	0.23125	0.572062
	ENSMUSG00000018965.12	Ywhah	0.186194	7.36778	14.4423	0.000941087	0.0494537
	ENSMUSG00000018974.8	Sart3	-0.0663063	5.48967	3.80345	0.0636217	0.320563
	ENSMUSG00000018983.10	E2f2	0.143644	5.17675	6.36211	0.0191502	0.18443
	ENSMUSG00000018986.11	Slfn3	-0.167744	1.51144	2.20712	0.151153	0.475211
	ENSMUSG00000018995.13	Nars2	-0.0620665	2.8095	1.13102	0.298759	0.632988
	ENSMUSG00000018999.15	Slc35b4	0.0332235	5.42552	1.18235	0.288307	0.624237
	ENSMUSG00000019027.9	Dnah1	-0.146872	4.13413	1.41697	0.246222	0.586054
	ENSMUSG00000019039.15	Dalrd3	0.000446588	6.02606	7.31553e-05	0.993251	0.998097
	ENSMUSG00000019054.14	Fis1	0.0440664	6.38053	0.550227	0.465843	0.764535
	ENSMUSG00000019055.16	Plod1	-0.115692	5.55961	2.81619	0.107055	0.409039
	ENSMUSG00000019066.14	Rab3d	-0.0204063	6.61938	0.222695	0.641506	0.857841
	ENSMUSG00000019080.9	Mfsd3	-0.0540363	2.25363	0.25817	0.61629	0.847002
	ENSMUSG00000019082.19	Slc25a22	-0.0120759	5.00125	0.0941156	0.76181	0.91408
	ENSMUSG00000019087.14	Atp6ap1	0.0660465	7.79247	4.32715	0.04901	0.281644
	ENSMUSG00000019088.15	Dnase1l1	-0.00220173	4.84824	0.00277915	0.958419	0.987876
	ENSMUSG00000019102.11	Aldh3a1	-0.541152	4.57218	1.42561	0.24483	0.585296
	ENSMUSG00000019122.9	Ccl9	-0.29522	3.77979	8.07607	0.00931732	0.134398
	ENSMUSG00000019124.11	Scrn1	0.0756724	5.30316	3.53002	0.0731889	0.341947
	ENSMUSG00000019132.12	BC005537	0.0462098	7.90797	0.449158	0.509507	0.789812
	ENSMUSG00000019139.11	Isyna1	0.0647054	5.22844	0.944313	0.341428	0.671892
	ENSMUSG00000019143.16	Hars2	-0.0112529	4.89551	0.0904923	0.766295	0.915629
	ENSMUSG00000019158.10	Tmem160	-0.00298475	4.16954	0.00159256	0.968517	0.991392
	ENSMUSG00000019173.12	Rab5c	0.0375383	7.57329	1.09413	0.306585	0.640024
	ENSMUSG00000019178.18	Styxl1	-0.119157	0.876431	0.540894	0.469606	0.766422
	ENSMUSG00000019179.11	Mdh2	0.00161029	6.8943	0.00107853	0.974089	0.993622
	ENSMUSG00000019188.17	H13	-0.0277427	6.78337	0.710715	0.408016	0.724288
	ENSMUSG00000019189.14	Rnf145	-0.017204	7.13541	0.274567	0.605371	0.841881
	ENSMUSG00000019194.16	Scn1b	-0.211142	3.44706	3.19932	0.0870449	0.370496
	ENSMUSG00000019210.11	Atp6v1e1	0.0572414	6.49198	1.20592	0.28367	0.619877
	ENSMUSG00000019214.15	Chtf18	-0.103655	1.30799	0.515595	0.480064	0.771621
	ENSMUSG00000019235.10	Rps6kl1	0.0182896	1.39703	0.0283891	0.867692	0.956832
	ENSMUSG00000019254.17	Ppp1r12c	0.0936917	6.90541	6.752	0.0161742	0.173257
	ENSMUSG00000019256.18	Ahr	-0.115366	6.76399	4.18989	0.0524327	0.290171
	ENSMUSG00000019261.4	Map1s	-0.0350632	5.41044	0.393234	0.536871	0.807036
	ENSMUSG00000019278.6	Dpep1	-0.104467	7.33885	0.644639	0.430376	0.74032
	ENSMUSG00000019295.9	Tmem129	0.0395014	5.10781	1.12336	0.30036	0.634477
	ENSMUSG00000019297.10	Nop9	-0.0188288	4.30606	0.159319	0.69352	0.883061
	ENSMUSG00000019302.17	Atp6v0a1	0.0476465	7.21752	1.90054	0.181474	0.515614
	ENSMUSG00000019303.15	Psmc3ip	-0.116112	2.15612	1.17381	0.290011	0.625152
	ENSMUSG00000019312.11	Grb7	-0.0819658	4.92077	1.37191	0.253651	0.592916
	ENSMUSG00000019320.15	Noxo1	-0.190747	3.02157	3.20132	0.0869528	0.370396
	ENSMUSG00000019326.15	Aoc3	-0.326467	4.21396	0.884417	0.356911	0.685817
	ENSMUSG00000019338.14	Zfp687	-0.0762367	5.50631	5.21555	0.0320937	0.233108
	ENSMUSG00000019359.15	Gdpd2	-0.341382	3.62243	3.96488	0.0586465	0.306803
	ENSMUSG00000019362.9	D8Ertd738e	0.0952854	5.81572	2.34341	0.139653	0.456941
	ENSMUSG00000019368.14	Sec14l4	0.0353436	6.68001	0.824472	0.37343	0.697997
	ENSMUSG00000019370.11	Calm3	0.0317343	7.58649	0.887428	0.356109	0.685038
	ENSMUSG00000019373.12	Cops3	0.0560617	5.27472	2.68807	0.11491	0.422094
	ENSMUSG00000019428.17	Fkbp8	-0.0051221	7.54281	0.0145516	0.905047	0.970073
	ENSMUSG00000019432.16	Ddx39b	-0.00268044	7.7855	0.00539921	0.942069	0.981696
	ENSMUSG00000019433.10	Gipc1	0.059454	5.4451	1.14357	0.296157	0.630776
	ENSMUSG00000019437.18	Tlcd1	-0.0477863	4.25665	0.768197	0.389971	0.711517
	ENSMUSG00000019461.13	Plscr3	0.172465	6.70546	12.2052	0.00198964	0.0704907
	ENSMUSG00000019464.7	Ptger1	-0.0296132	4.40465	0.366615	0.550871	0.814187
	ENSMUSG00000019467.16	Arhgef25	0.111899	5.3894	6.13098	0.0211992	0.1942
	ENSMUSG00000019470.13	Xab2	-0.037035	5.9392	1.45566	0.240065	0.58052
	ENSMUSG00000019471.11	Cdc37	-0.0252668	7.12364	0.452119	0.508128	0.789191
	ENSMUSG00000019478.18	Rab4a	-0.034756	2.86279	0.20437	0.655513	0.86438
	ENSMUSG00000019487.12	Trip10	0.0465853	5.95722	0.793433	0.382423	0.705232
	ENSMUSG00000019494.15	Cops6	0.021164	5.58637	0.189571	0.667393	0.871554
	ENSMUSG00000019505.8	Ubb	0.0739007	10.1657	3.28354	0.083249	0.362538
	ENSMUSG00000019518.12	Ap4m1	-0.106996	5.33277	13.8837	0.00112897	0.0539776
	ENSMUSG00000019528.19	Gyg	0.0482873	7.38049	0.624976	0.437398	0.745702
	ENSMUSG00000019539.12	Rcn3	0.0305157	6.03318	0.275411	0.604821	0.84151
	ENSMUSG00000019558.15	Slc6a8	0.130839	5.93684	11.4691	0.00257673	0.0798056
	ENSMUSG00000019564.13	Arid3a	-0.263565	3.94985	16.5726	0.000483039	0.0349285
	ENSMUSG00000019577.7	Pdk4	-0.42762	5.01899	1.35741	0.256103	0.595554
	ENSMUSG00000019578.12	Ubxn6	0.0259672	5.91218	0.314435	0.580473	0.830263
	ENSMUSG00000019579.14	Mydgf	0.0169642	4.99932	0.0930139	0.763163	0.914551
	ENSMUSG00000019590.17	Cyb561	0.106109	6.92565	10.5428	0.00360183	0.0902985
	ENSMUSG00000019647.17	Sema6a	0.158134	6.68154	10.6035	0.00352243	0.0898527
	ENSMUSG00000019659.9	Ccdc12	0.0225565	5.42737	0.159331	0.693509	0.883061
	ENSMUSG00000019689.5	Fmc1	-0.00830899	3.3268	0.0121298	0.913272	0.972711
	ENSMUSG00000019699.17	Akt3	0.0908388	6.43012	4.0918	0.0550446	0.296742
	ENSMUSG00000019710.14	Mrpl24	0.0383827	6.06087	1.5092	0.231865	0.572125
	ENSMUSG00000019715.15	Gle1	0.000718152	5.87169	0.000459789	0.98308	0.996404
	ENSMUSG00000019718.9	L3hypdh	-0.0577707	2.35432	0.363052	0.552797	0.815103
	ENSMUSG00000019726.13	Lyst	-0.10583	5.28998	6.7555	0.0161499	0.173166
	ENSMUSG00000019731.14	Slc35e1	0.04674	6.07956	1.54299	0.226873	0.567961
	ENSMUSG00000019732.15	Calr3	-0.0446529	0.541711	0.0531978	0.819659	0.93673
	ENSMUSG00000019734.17	Tmc4	-0.0326775	6.27976	0.596546	0.447879	0.752893
	ENSMUSG00000019737.15	Syne4	-0.0545125	2.4301	0.299912	0.58929	0.834371
	ENSMUSG00000019738.16	Polr2i	0.050373	3.69983	0.633075	0.434484	0.743719
	ENSMUSG00000019761.11	Krt10	-0.0228961	1.70662	0.0774409	0.783319	0.922887
	ENSMUSG00000019762.5	Iyd	-0.170228	2.61149	2.41989	0.133658	0.449697
	ENSMUSG00000019763.12	Rmnd1	-0.118124	3.79119	3.26553	0.0840446	0.364172
	ENSMUSG00000019767.13	Ccdc170	-0.293951	3.68789	9.16757	0.00604968	0.112885
	ENSMUSG00000019768.17	Esr1	0.0229019	1.37812	0.0160381	0.900341	0.968822
	ENSMUSG00000019773.8	Fbxo5	-0.293076	2.20623	7.92296	0.00991476	0.137751
	ENSMUSG00000019774.9	Mtrf1l	0.0885112	2.81561	1.84403	0.187846	0.522726
	ENSMUSG00000019775.18	Rgs17	0.269928	0.0157705	1.55189	0.225581	0.566862
	ENSMUSG00000019777.17	Hdac2	0.0780612	5.62114	4.83144	0.0384345	0.254157
	ENSMUSG00000019779.16	Frk	-0.00565031	2.73082	0.00457567	0.946662	0.983114
	ENSMUSG00000019782.11	Rwdd1	0.00986763	4.84018	0.0451022	0.833715	0.942343
	ENSMUSG00000019787.10	Trdn	-0.353114	2.02762	1.10104	0.305099	0.63865
	ENSMUSG00000019789.10	Hey2	-0.134198	2.0224	1.5017	0.232992	0.572309
	ENSMUSG00000019790.18	Stxbp5	-0.073458	5.2575	2.20938	0.150953	0.475211
	ENSMUSG00000019791.13	Hint3	-0.0924355	2.93633	1.51122	0.231564	0.572062
	ENSMUSG00000019792.9	Trmt11	-0.0562766	3.01257	0.694145	0.413452	0.729344
	ENSMUSG00000019794.14	Katna1	0.0332598	4.44698	0.542405	0.468993	0.766185
	ENSMUSG00000019795.18	Pcmt1	0.0847079	5.66558	6.96798	0.0147492	0.164813
	ENSMUSG00000019796.13	Lrp11	0.098352	2.49417	0.698539	0.412	0.728089
	ENSMUSG00000019797.12	Mtres1	-0.137481	3.15678	4.58111	0.0433224	0.265906
	ENSMUSG00000019802.14	Sec63	0.044476	7.18983	1.25913	0.273563	0.610675
	ENSMUSG00000019804.13	Snx3	0.0759722	7.03871	4.79647	0.0390785	0.255773
	ENSMUSG00000019806.14	Aig1	0.0366531	5.10609	0.565004	0.459986	0.760408
	ENSMUSG00000019808.9	Adat2	-0.126845	1.55993	1.33851	0.259346	0.597538
	ENSMUSG00000019809.17	Pex3	0.0523102	4.6381	1.579	0.221701	0.563619
	ENSMUSG00000019810.16	Fuca2	0.0742366	6.01155	3.28666	0.0831121	0.362417
	ENSMUSG00000019813.17	Cep57l1	-0.0996034	2.21359	1.42711	0.244589	0.585188
	ENSMUSG00000019814.6	Ltv1	-0.0118562	4.38868	0.0622756	0.805183	0.930843
	ENSMUSG00000019817.19	Plagl1	0.00120404	5.38411	0.000129841	0.991008	0.997954
	ENSMUSG00000019818.16	Cd164	0.0291471	7.76517	0.0968097	0.758536	0.913137
	ENSMUSG00000019820.12	Utrn	0.0592249	7.81659	2.29729	0.143424	0.463485
	ENSMUSG00000019822.13	Smpd2	-0.0428999	5.15366	1.09939	0.305454	0.63865
	ENSMUSG00000019823.18	Mical1	-0.0906247	5.90203	3.30201	0.0824425	0.361802
	ENSMUSG00000019826.12	Zbtb24	-0.00481938	4.42458	0.0141958	0.906209	0.970485
	ENSMUSG00000019831.15	Wasf1	-0.0262445	-0.210908	0.016595	0.898635	0.968182
	ENSMUSG00000019832.6	Rab32	-0.0213357	4.15211	0.0987928	0.756158	0.912706
	ENSMUSG00000019837.9	Gtf3c6	-0.0796347	4.58817	2.37238	0.137345	0.454932
	ENSMUSG00000019838.12	Slc16a10	0.0661082	4.35936	0.813328	0.376623	0.701323
	ENSMUSG00000019841.16	Rev3l	-0.0177286	5.24066	0.142042	0.709765	0.891408
	ENSMUSG00000019842.7	Traf3ip2	-0.0494871	4.60572	1.14739	0.29537	0.62979
	ENSMUSG00000019843.15	Fyn	-0.00823219	6.04734	0.0723418	0.79039	0.924257
	ENSMUSG00000019845.9	Tube1	-0.249376	0.755604	3.28753	0.0830738	0.362417
	ENSMUSG00000019846.12	Lama4	0.0346799	7.00279	0.67029	0.421476	0.734773
	ENSMUSG00000019848.15	Popdc3	0.260394	3.6377	11.3867	0.00265348	0.0802911
	ENSMUSG00000019849.12	Prep	0.0965494	6.83422	5.3934	0.0295622	0.224917
	ENSMUSG00000019850.12	Tnfaip3	-0.0879897	5.19168	3.69712	0.0671613	0.327908
	ENSMUSG00000019851.9	Perp	0.0714185	4.63006	0.0534088	0.819308	0.936451
	ENSMUSG00000019852.8	Arfgef3	0.241191	3.89623	10.2928	0.00395004	0.0939155
	ENSMUSG00000019853.7	Hebp2	-0.114669	1.21272	0.0998662	0.754882	0.912208
	ENSMUSG00000019854.18	Reps1	0.025134	5.35019	0.760432	0.392338	0.712782
	ENSMUSG00000019856.15	Fam184a	0.0406248	3.48736	0.501775	0.485943	0.776081
	ENSMUSG00000019857.8	Asf1a	0.0146675	3.68181	0.0445541	0.834712	0.942833
	ENSMUSG00000019861.16	Gopc	0.038188	5.43972	0.452462	0.507969	0.789191
	ENSMUSG00000019863.8	Qrsl1	-0.0156169	3.19022	0.0715643	0.791492	0.924965
	ENSMUSG00000019864.15	Rtn4ip1	-0.184041	3.45049	15.6029	0.00065102	0.0414711
	ENSMUSG00000019866.16	Crybg1	-0.0684801	4.64909	0.236527	0.631395	0.853424
	ENSMUSG00000019868.17	Vta1	0.031749	4.60419	0.963506	0.336668	0.66811
	ENSMUSG00000019872.14	Smpdl3a	0.0144234	7.01425	0.140929	0.71085	0.891697
	ENSMUSG00000019873.9	Reep3	0.0162617	6.62581	0.1377	0.714024	0.892809
	ENSMUSG00000019876.16	Pkib	-0.246732	2.01786	6.98374	0.0146508	0.164526
	ENSMUSG00000019877.11	Serinc1	0.0698416	7.79003	2.37186	0.137386	0.454932
	ENSMUSG00000019878.9	Hsf2	0.0287283	3.85823	0.228152	0.637472	0.85583
	ENSMUSG00000019880.11	Rspo3	0.152654	1.64352	1.33325	0.260257	0.598713
	ENSMUSG00000019883.12	Echdc1	-0.0404042	4.56853	0.234678	0.632725	0.853951
	ENSMUSG00000019889.11	Ptprk	0.0925208	6.79162	3.78772	0.0641317	0.321835
	ENSMUSG00000019891.16	Dcbld1	0.161747	3.96204	7.56327	0.011492	0.146467
	ENSMUSG00000019892.14	Lrriq1	-0.166149	1.8452	1.66438	0.210021	0.550579
	ENSMUSG00000019893.14	Ros1	0.326825	1.2691	1.95732	0.175337	0.506659
	ENSMUSG00000019894.15	Slc6a15	0.182389	2.41126	2.90039	0.102235	0.399259
	ENSMUSG00000019897.9	Ccdc59	-0.0666952	5.20992	2.40187	0.135042	0.451231
	ENSMUSG00000019899.18	Lama2	-0.0743849	6.09559	2.12213	0.1589	0.485065
	ENSMUSG00000019905.9	Gprc6a	0.246222	1.84968	2.77998	0.109209	0.412742
	ENSMUSG00000019907.11	Ppp1r12a	-0.0329925	6.61156	0.703819	0.410265	0.726552
	ENSMUSG00000019909.5	Fam162b	0.229454	2.75176	2.52871	0.125645	0.438569
	ENSMUSG00000019916.15	P4ha1	0.195017	6.61925	10.6054	0.0035199	0.0898527
	ENSMUSG00000019917.11	Septin10	0.0701099	4.54756	1.54621	0.226405	0.567519
	ENSMUSG00000019920.19	Lims1	0.0981872	7.39308	3.56165	0.072002	0.33932
	ENSMUSG00000019923.15	Zwint	0.000934208	5.63575	0.000505111	0.982266	0.996134
	ENSMUSG00000019927.7	Ube2d1	0.00511483	4.76153	0.0179798	0.894516	0.966814
	ENSMUSG00000019929.17	Dcn	-0.234306	7.37667	3.87915	0.0612312	0.313391
	ENSMUSG00000019942.14	Cdk1	0.0399749	2.11398	0.0299044	0.864242	0.955321
	ENSMUSG00000019943.11	Atp2b1	0.0460585	7.39886	1.41029	0.247306	0.587057
	ENSMUSG00000019944.15	Rhobtb1	-0.0519992	4.86936	0.703467	0.41038	0.726552
	ENSMUSG00000019945.11	Cabcoco1	0.0725314	2.34701	0.264299	0.612158	0.844573
	ENSMUSG00000019947.11	Arid5b	0.048246	6.90979	1.33108	0.260635	0.599166
	ENSMUSG00000019948.5	Actr6	0.0854927	2.61875	1.86063	0.185946	0.520786
	ENSMUSG00000019951.11	Uhrf1bp1l	-0.0742949	5.97152	2.41103	0.134336	0.450941
	ENSMUSG00000019952.16	Poc1b	-0.0296655	4.44586	0.356282	0.556495	0.817036
	ENSMUSG00000019960.9	Dusp6	0.260203	6.43616	6.4048	0.0187964	0.183753
	ENSMUSG00000019961.18	Tmpo	-0.049771	6.77195	1.72102	0.202695	0.541202
	ENSMUSG00000019966.19	Kitl	0.151387	7.35092	2.4086	0.134523	0.450946
	ENSMUSG00000019969.15	Psen1	-0.0292403	6.21859	0.972489	0.334472	0.665803
	ENSMUSG00000019970.16	Sgk1	0.0775959	6.56177	2.12142	0.158966	0.485065
	ENSMUSG00000019971.11	Cep290	-0.0192993	3.77142	0.0688335	0.795413	0.926617
	ENSMUSG00000019975.13	Ikbip	0.0667825	4.82735	1.61624	0.216509	0.558251
	ENSMUSG00000019977.17	Hbs1l	-0.00198659	5.50044	0.00385024	0.951067	0.985009
	ENSMUSG00000019978.17	Epb41l2	0.0278931	8.30945	1.06394	0.3132	0.646296
	ENSMUSG00000019979.13	Apaf1	0.0138082	4.8955	0.0638754	0.80275	0.929828
	ENSMUSG00000019982.16	Myb	-0.22035	3.92774	4.30226	0.0496114	0.283077
	ENSMUSG00000019984.17	Med23	0.0150037	5.09045	0.147689	0.704336	0.888611
	ENSMUSG00000019986.18	Ahi1	0.0561098	3.49121	0.748499	0.396017	0.715665
	ENSMUSG00000019987.10	Arg1	0.0235217	1.57603	0.00578231	0.940053	0.981134
	ENSMUSG00000019988.8	Nedd1	0.0059928	4.18386	0.0182896	0.893617	0.966593
	ENSMUSG00000019989.9	Enpp3	-0.152962	1.76	2.27564	0.145235	0.466171
	ENSMUSG00000019990.16	Pde7b	-0.00850289	4.91366	0.0218338	0.883837	0.962191
	ENSMUSG00000019992.9	Mtfr2	-0.0740802	-0.409793	0.0654145	0.800441	0.92877
	ENSMUSG00000019996.18	Map7	-0.0476797	5.55792	1.32547	0.261614	0.599747
	ENSMUSG00000019997.12	Ccn2	-0.058843	7.62338	0.135435	0.716277	0.893877
	ENSMUSG00000019998.7	Stx7	0.0553199	6.69571	2.01297	0.169565	0.498945
	ENSMUSG00000020003.17	Pex7	0.0623378	4.50045	2.19335	0.152376	0.47683
	ENSMUSG00000020009.14	Ifngr1	0.0114506	7.62595	0.098057	0.757037	0.912828
	ENSMUSG00000020010.8	Vnn3	-0.0437415	3.16841	0.12454	0.727422	0.899651
	ENSMUSG00000020014.19	Cfap54	-0.0964726	3.76008	0.538044	0.470764	0.767248
	ENSMUSG00000020015.11	Cdk17	0.0459974	5.4604	0.941959	0.342019	0.67247
	ENSMUSG00000020018.7	Snrpf	-0.0493504	3.95055	0.454767	0.506901	0.788397
	ENSMUSG00000020019.5	Ntn4	0.0699376	7.49422	3.65007	0.0687992	0.331912
	ENSMUSG00000020020.9	Usp44	0.00523951	0.775392	0.0019028	0.965589	0.990726
	ENSMUSG00000020021.5	Fgd6	-0.0497447	5.33827	1.59861	0.218949	0.560799
	ENSMUSG00000020022.18	Ndufa12	0.0588278	4.41832	0.772269	0.388738	0.710669
	ENSMUSG00000020023.19	Tmcc3	0.0688602	7.4389	2.23629	0.148599	0.471075
	ENSMUSG00000020024.8	Cep83	-0.0202442	5.19511	0.127845	0.723985	0.897874
	ENSMUSG00000020027.19	Socs2	0.193838	6.69368	12.8363	0.00160205	0.0636081
	ENSMUSG00000020029.7	Nudt4	-0.00705162	6.84627	0.0161656	0.899948	0.968782
	ENSMUSG00000020032.15	Nuak1	-0.151844	6.00988	4.97517	0.0359103	0.246088
	ENSMUSG00000020034.8	Tcp11l2	0.0343769	6.36018	0.515302	0.480187	0.771677
	ENSMUSG00000020038.11	Cry1	-0.100391	3.37627	0.504814	0.48464	0.77532
	ENSMUSG00000020042.16	Btbd11	0.0330546	1.97494	0.0664617	0.798886	0.928021
	ENSMUSG00000020044.14	Timp3	0.0152039	10.3134	0.120422	0.731779	0.901909
	ENSMUSG00000020048.14	Hsp90b1	0.130816	9.33652	8.70777	0.00723989	0.119972
	ENSMUSG00000020052.10	Ascl1	-0.175248	-0.197972	0.280425	0.601572	0.840136
	ENSMUSG00000020053.19	Igf1	-0.227984	3.6803	3.35269	0.0802744	0.3578
	ENSMUSG00000020056.17	Washc3	-0.0656954	4.14467	1.80339	0.192599	0.529178
	ENSMUSG00000020057.3	Dram1	0.0797629	8.45201	3.15635	0.0890586	0.373995
	ENSMUSG00000020062.8	Slc5a8	0.192265	0.418557	0.244758	0.625552	0.850481
	ENSMUSG00000020063.17	Sirt1	0.136494	4.7426	1.27013	0.271533	0.609466
	ENSMUSG00000020064.10	Herc4	-0.0203854	5.31789	0.105922	0.747821	0.908374
	ENSMUSG00000020067.9	Mypn	-0.093554	1.85724	0.0595969	0.809331	0.932236
	ENSMUSG00000020069.17	Hnrnph3	0.0227633	5.75863	0.336012	0.567858	0.82372
	ENSMUSG00000020070.19	Rufy2	-0.0548161	4.56517	0.870452	0.360663	0.688175
	ENSMUSG00000020072.16	Pbld2	-0.0565252	1.87606	0.229656	0.636371	0.855682
	ENSMUSG00000020074.8	Ccar1	0.0209549	5.95557	0.164665	0.688703	0.880823
	ENSMUSG00000020075.9	Ddx21	0.0430629	6.18102	1.49957	0.233314	0.572921
	ENSMUSG00000020076.8	Ddx50	0.0715496	6.23361	4.3361	0.0487956	0.281434
	ENSMUSG00000020077.15	Srgn	0.0533076	6.56135	1.08769	0.307982	0.641668
	ENSMUSG00000020078.17	Vps26a	0.0616288	6.06092	2.87523	0.103648	0.401378
	ENSMUSG00000020079.16	Supv3l1	-0.103264	3.71524	3.28421	0.0832196	0.362538
	ENSMUSG00000020080.9	Hkdc1	0.0272355	3.2598	0.0814443	0.777941	0.920246
	ENSMUSG00000020083.14	Fam241b	-0.0221785	3.28064	0.106466	0.747197	0.908323
	ENSMUSG00000020085.16	Aifm2	-0.166474	4.74248	4.30035	0.0496578	0.283234
	ENSMUSG00000020086.7	Macroh2a2	0.0274756	3.98853	0.198703	0.659999	0.867262
	ENSMUSG00000020087.6	Tysnd1	-0.0695027	4.45634	1.454	0.240325	0.580702
	ENSMUSG00000020088.11	Sar1a	0.100421	7.4391	15.454	0.000682049	0.0418265
	ENSMUSG00000020089.9	Ppa1	-0.0565319	3.6196	0.442479	0.512641	0.792046
	ENSMUSG00000020091.16	Eif4ebp2	0.0267614	8.17889	0.565144	0.459931	0.760408
	ENSMUSG00000020092.10	Pald1	0.0660347	6.77105	1.63001	0.214628	0.555763
	ENSMUSG00000020096.22	Tbata	-0.193262	2.55567	0.783607	0.385336	0.707818
	ENSMUSG00000020097.15	Sgpl1	-0.0147683	6.42797	0.180087	0.6753	0.874221
	ENSMUSG00000020098.8	Pcbd1	0.0182162	2.47606	0.0362498	0.850696	0.949686
	ENSMUSG00000020099.9	Unc5b	-0.141984	4.99726	4.60363	0.0428552	0.265178
	ENSMUSG00000020100.16	Slc29a3	-0.0948339	4.92605	2.19027	0.152652	0.477011
	ENSMUSG00000020101.15	Vsir	-0.171951	7.17239	3.99467	0.0577777	0.304626
	ENSMUSG00000020102.16	Slc16a7	0.0250678	4.277	0.0925247	0.763767	0.914733
	ENSMUSG00000020105.10	Lrig3	-0.158072	4.25659	4.39474	0.0474179	0.276865
	ENSMUSG00000020107.11	Anapc16	0.0526324	5.50569	2.94383	0.0998465	0.396239
	ENSMUSG00000020108.5	Ddit4	-0.0987204	3.97077	0.512288	0.48146	0.772566
	ENSMUSG00000020109.14	Dnajb12	0.0565104	5.72986	2.92176	0.101052	0.397611
	ENSMUSG00000020111.16	Micu1	-0.000540821	6.33992	0.000244806	0.987654	0.997353
	ENSMUSG00000020114.13	Cand1	0.0375513	6.36691	1.28525	0.268776	0.606903
	ENSMUSG00000020115.4	Tbk1	-0.0334051	5.54578	0.74911	0.395827	0.715665
	ENSMUSG00000020116.8	Pno1	0.0661912	3.84448	2.14657	0.156624	0.483488
	ENSMUSG00000020120.16	Plek	-0.00847601	5.97666	0.00635763	0.937148	0.980419
	ENSMUSG00000020121.16	Srgap1	0.134432	4.78866	6.37282	0.0190608	0.184018
	ENSMUSG00000020122.17	Egfr	-0.0362102	4.9474	0.523824	0.476619	0.770092
	ENSMUSG00000020123.7	Avpr1a	0.26268	1.26141	0.927515	0.345673	0.675684
	ENSMUSG00000020124.11	Usp15	-0.027491	5.76389	0.722743	0.404137	0.721705
	ENSMUSG00000020128.16	Vps54	0.00332505	6.15468	0.00635104	0.937181	0.980419
	ENSMUSG00000020130.10	Tbc1d15	0.0412179	5.41488	0.80241	0.379789	0.703199
	ENSMUSG00000020131.15	Pcsk4	-0.213292	2.27524	4.23826	0.0511965	0.286967
	ENSMUSG00000020132.11	Rab21	0.0566776	6.4636	1.75227	0.198789	0.536657
	ENSMUSG00000020133.9	2310011J03Rik	0.0334206	5.27805	0.372963	0.54747	0.812341
	ENSMUSG00000020134.14	Peli1	0.110502	5.86855	7.87273	0.0101199	0.139187
	ENSMUSG00000020135.14	Apc2	0.0649666	3.60879	0.957666	0.338106	0.669063
	ENSMUSG00000020137.6	Thap2	0.189547	4.54493	9.05037	0.0063311	0.114608
	ENSMUSG00000020140.16	Lgr5	0.266802	-0.319984	1.69457	0.206075	0.54605
[truncated: 15,500 more rows]

## Sheet: c DEGs +MP vs PBS 2dpi
	Ensembl_ID	HUGO_ID	logFC	logCPM	F	PValue	FDR	M1_MP	M2_MP	M3_MP	M4_MP	M5_MP	M6_MP	M1_PBS	M2_PBS	M3_PBS	M4_PBS	M5_PBS	M6_PBS
+MPs vs. PBS at 2 days post delivery. Significant differentially expressed genes (EdgeR, FDR<0.05) from lungs of C57BL/6J mice.	ENSMUSG00000020893.18	Per1	1.44848	6.57187	105.05	5.60757e-10	3.27089e-06	151.792	136.344	165.568	169.339	196.408	132.795	56.0371	45.1561	59.2723	47.9064	75.0556	65.6157
	ENSMUSG00000028341.10	Nr4a3	1.4277	2.47545	44.5405	8.92772e-07	0.000538711	8.82894	8.35528	10.7388	8.25057	10.5686	5.76782	3.02457	2.07842	4.26608	2.69562	3.52079	3.93749
	ENSMUSG00000003032.9	Klf4	1.02464	7.24201	116.463	2.10887e-10	2.82519e-06	191.091	200.238	232.203	253.316	272.167	183.081	97.4738	121.439	107.248	97.8228	99.5374	131.259
	ENSMUSG00000029378.6	Areg	0.925687	1.90419	21.5812	0.00011644	0.0159186	4.2115	5.20398	3.86053	5.3946	6.07187	8.82774	2.47465	2.697	2.81228	2.88479	2.94764	3.85489
	ENSMUSG00000055148.8	Klf2	0.906046	7.36282	80.698	6.31239e-09	1.22734e-05	221.155	209.72	230.408	235.228	269.779	199.382	115.759	126.536	100.217	109.598	123.746	153.039
	ENSMUSG00000060969.10	Irx1	0.857027	5.9605	89.3283	2.51956e-09	7.34831e-06	74.7669	79.9678	74.7638	72.2069	94.711	106.339	51.0878	47.482	46.1404	47.8591	41.2397	43.753
	ENSMUSG00000041695.3	Kcnj2	0.830954	4.67041	34.4996	5.8228e-06	0.0020413	33.1085	31.0793	29.1171	36.7814	43.189	29.164	18.01	21.3038	17.1358	16.3629	19.7874	21.2569
	ENSMUSG00000053475.6	Tnfaip6	0.813299	-0.112126	15.9016	0.00059331	0.039327	1.04019	0.982974	0.924352	0.951989	1.67675	1.08316	0.577419	0.519605	0.548156	0.591145	0.818789	0.743442
	ENSMUSG00000074874.11	Ctla2b	0.79231	2.73637	50.5405	3.32636e-07	0.000253078	9.51394	7.77706	7.6395	11.6258	10.8227	9.99214	5.19677	5.64142	5.62456	5.3676	6.05904	5.23163
	ENSMUSG00000037887.12	Dusp8	0.784565	5.25523	111.37	3.22898e-10	2.82519e-06	48.4577	47.9634	51.6006	50.2823	59.169	50.421	31.6205	34.2444	30.6014	30.1248	23.854	28.2508
	ENSMUSG00000029321.2	Slc10a6	0.783346	4.32899	57.3002	1.20248e-07	0.000123777	24.0512	23.389	23.2447	25.069	29.3431	24.9397	13.913	15.7366	15.5152	12.7924	14.7382	14.4834
	ENSMUSG00000031431.14	Tsc22d3	0.743481	7.05828	90.9791	2.13101e-09	7.34831e-06	182.16	164.388	155.645	196.802	196.739	151.669	104.925	96.9187	97.8578	113.263	114.439	98.217
	ENSMUSG00000035237.8	Lcat	0.720754	1.04834	37.1995	3.40736e-06	0.00141965	2.15649	2.45744	2.71868	2.48094	2.18486	2.76205	1.53978	1.80624	1.42997	1.37146	1.33735	1.45935
	ENSMUSG00000028967.11	Errfi1	0.682514	7.25665	28.5208	2.10873e-05	0.00521402	169.272	161.237	180.031	193.311	237.794	166.915	104.953	83.978	101.171	127.167	126.967	146.596
	ENSMUSG00000073408.3	Mucl3	0.673881	0.14716	22.872	8.30024e-05	0.0132042	1.42075	1.18535	1.16903	1.38471	1.77837	1.70597	0.824884	1.06395	0.691153	0.945833	0.818789	1.07386
	ENSMUSG00000028525.17	Pde4b	0.650893	6.98713	20.4385	0.000158537	0.0187658	129.009	155.426	158.662	199.773	154.667	121.639	84.2206	122.355	110.156	80.0411	75.0829	113.444
	ENSMUSG00000026819.16	Slc25a25	0.636829	5.18527	84.3877	4.22362e-09	9.23864e-06	40.7197	44.5808	45.7282	44.8012	48.7528	47.2528	28.8984	30.8051	26.3353	29.2262	26.0102	33.565
	ENSMUSG00000074170.6	Plekhf1	0.626115	2.83783	31.9649	9.86835e-06	0.00313233	8.04245	8.21073	8.72697	9.54874	10.6956	7.98829	5.22426	5.56719	5.74372	4.42177	6.49572	7.04893
	ENSMUSG00000120926.1	ENSMUSG00000120926.1	0.596526	2.75592	42.8793	1.1924e-06	0.000652059	6.97689	6.33151	9.46102	8.42366	7.97727	7.203	5.05929	5.41873	5.31473	4.96562	4.55792	5.34177
	ENSMUSG00000026826.14	Nr4a2	0.585742	3.16491	14.8207	0.000833386	0.0467417	10.1482	10.1189	11.9622	10.5007	14.2016	7.69043	5.47173	5.78988	6.41104	7.80312	7.64203	9.96763
	ENSMUSG00000089809.10	Rasgef1b	0.578643	5.2714	85.6566	3.69043e-09	9.22554e-06	44.17	43.8002	48.61	52.9075	47.9144	44.0846	32.4729	31.3247	32.6987	32.0637	29.1489	30.7289
	ENSMUSG00000025787.7	Tgm4	0.577409	0.694307	22.0376	0.000103182	0.0147119	1.90279	1.50337	1.68558	2.07707	1.77837	1.65182	1.04485	1.06395	1.35847	1.135	1.33735	1.15647
	ENSMUSG00000044595.11	Dnd1	0.556482	0.497116	14.6299	0.0008859	0.0481249	1.26853	1.79248	1.60402	1.35586	1.29567	1.43519	0.714899	0.816522	1.35847	1.06406	1.06443	0.908652
	ENSMUSG00000032515.9	Csrnp1	0.555969	4.80577	19.9024	0.000183799	0.0201863	34.3517	29.4314	34.7991	35.4544	45.3231	30.5992	23.0967	19.1017	20.8061	22.9837	25.8464	31.1144
	ENSMUSG00000046791.9	Riox1	0.55189	4.43292	64.8863	4.24087e-08	6.18425e-05	24.4825	29.9518	27.7306	25.2421	28.0475	24.0461	19.8797	20.9574	18.2798	17.1905	15.9664	16.4934
	ENSMUSG00000024427.8	Spry4	0.541219	5.18066	53.6624	2.05548e-07	0.000179845	37.3454	40.0996	48.9635	43.2145	42.935	39.9415	29.1184	28.8257	26.4068	28.4932	26.6652	34.0331
	ENSMUSG00000071637.6	Cebpd	0.533084	5.60314	15.0717	0.000769423	0.0451384	52.1364	44.0315	50.2141	60.2926	69.3565	60.0341	32.6379	32.6114	38.7284	34.3574	48.6906	45.3775
	ENSMUSG00000008384.9	Sertad1	0.531713	4.63044	60.4985	7.65825e-08	8.93411e-05	35.2143	28.0148	31.6727	28.2135	30.6642	31.9532	22.7943	22.9121	19.6621	22.5108	18.2317	22.3859
	ENSMUSG00000000317.12	Bcl6b	0.525297	5.59418	49.7861	3.7485e-07	0.000273313	56.424	57.9666	63.3997	64.0717	63.2592	57.7594	44.5712	47.8036	41.3024	41.8531	36.3815	40.1734
	ENSMUSG00000023905.16	Tnfrsf12a	0.521105	4.3813	16.7333	0.000460093	0.0339712	23.3662	21.9145	20.7435	18.5494	28.2761	31.0596	20.2921	17.2707	14.6572	18.3728	13.9467	15.7775
	ENSMUSG00000074480.5	Mex3a	0.51021	1.52605	15.6515	0.00064123	0.0412532	2.89224	3.70061	3.7246	3.8368	2.74377	3.68274	2.58464	3.01866	2.21646	2.00989	1.99239	2.61582
	ENSMUSG00000001504.11	Irx2	0.500829	5.79412	59.3234	9.02012e-08	9.86519e-05	60.1027	59.9614	68.4292	58.7637	67.7051	78.1499	47.3483	50.0058	47.7849	48.4503	40.2025	43.9732
	ENSMUSG00000042510.8	AA986860	0.500642	6.36586	77.8362	8.70868e-09	1.52393e-05	90.9533	91.8214	97.356	100.334	105.076	97.4843	69.1803	69.0827	73.0716	68.9985	60.1537	71.5632
	ENSMUSG00000022893.15	Adamts1	0.498623	7.11621	25.9378	3.8639e-05	0.00795464	142.988	163.839	165.486	180.445	219.603	171.41	113.999	127.674	92.3047	139.7	118.67	146.458
	ENSMUSG00000039377.8	Hlx	0.49821	5.04281	24.991	4.86567e-05	0.00953257	39.8824	43.7134	36.8653	43.6184	47.9398	38.6417	28.2385	33.5516	26.0732	27.1927	28.6303	33.8129
	ENSMUSG00000005483.11	Dnajb1	0.484163	5.54115	22.0292	0.00010341	0.0147119	44.8804	52.4735	52.389	59.3118	69.6105	49.2566	39.072	43.82	39.3004	36.32	37.0911	38.8242
	ENSMUSG00000028214.14	Gem	0.484127	4.37012	34.8868	5.38341e-06	0.00200435	20.9053	22.7819	21.9126	25.5018	28.4793	24.5065	16.0302	17.4191	16.4447	19.0112	15.7207	18.3658
	ENSMUSG00000022144.5	Gdnf	0.477791	3.92126	37.8162	3.02541e-06	0.00129126	18.0892	15.4963	21.3417	18.3474	17.047	20.1197	13.5006	14.1283	13.9184	13.3362	12.0908	12.3081
	ENSMUSG00000074345.5	Tnfaip8l3	0.438025	2.47088	25.0364	4.81159e-05	0.00953257	6.97689	6.24478	6.57921	6.60622	5.66538	6.6885	4.45437	4.67644	4.69507	4.77646	5.10378	4.90121
	ENSMUSG00000022462.8	Slc38a2	0.437652	7.01303	61.5717	6.60837e-08	8.89538e-05	138.929	146.116	149.963	162.444	170.139	133.147	108.307	123.171	114.731	112.412	96.9173	109.451
	ENSMUSG00000036432.9	Siah2	0.414321	3.68792	51.0913	3.05093e-07	0.000242674	14.1567	15.1783	15.6868	15.578	15.8783	14.406	11.1634	11.9509	10.4865	11.7993	10.3713	12.4182
	ENSMUSG00000039220.17	Ppp1r10	0.409342	5.9691	68.7621	2.57871e-08	4.10225e-05	67.2572	68.5191	70.5498	70.9376	72.5067	70.6219	58.2918	51.812	48.8097	55.8987	46.671	55.0698
	ENSMUSG00000042812.6	Foxf1	0.406099	7.92341	29.1741	1.8185e-05	0.00474953	280.902	284.716	291.959	322.32	314.543	274.77	219.942	234.317	232.299	187.369	193.78	267.474
	ENSMUSG00000073975.4	Or51r1	0.391988	1.55618	17.1894	0.000401217	0.0320589	3.32354	3.70061	3.01774	3.51947	3.3535	4.00769	3.13456	2.59802	2.43095	2.62469	2.37449	2.78102
	ENSMUSG00000024793.15	Tnfrsf25	0.379631	2.019	14.4641	0.000934495	0.0493592	4.97262	3.9319	4.78488	4.21183	4.16647	4.33263	3.68448	3.95889	3.2651	3.405	3.32974	2.64335
	ENSMUSG00000037447.17	Arid5a	0.372881	4.67983	28.5619	2.08907e-05	0.00521402	28.4657	31.8888	32.3795	31.7041	30.6134	26.4291	26.5063	25.5843	21.6641	22.7473	23.0626	20.5686
	ENSMUSG00000045092.9	S1pr1	0.372766	8.30785	42.9374	1.18025e-06	0.000652059	353.842	342.798	338.639	378.459	391.292	309.621	277.271	268.042	285.16	255.257	268.808	278.626
	ENSMUSG00000000078.8	Klf6	0.370782	7.67427	27.4027	2.72969e-05	0.00628512	238.026	224.812	231.278	252.364	276.994	183.893	175.068	188.864	187.97	180.867	174.975	180.656
	ENSMUSG00000078202.4	Nrarp	0.352224	5.66804	15.6346	0.000644616	0.0413192	60.6862	57.9087	56.3039	63.8698	68.1116	49.7982	41.1892	42.5828	54.1721	42.8226	39.8477	58.8145
	ENSMUSG00000020601.9	Trib2	0.351592	6.55941	54.1473	1.91087e-07	0.000175991	99.4777	101.189	107.062	117.96	106.016	96.6719	81.856	85.0667	84.702	76.0213	79.3679	85.4408
	ENSMUSG00000022591.6	Gm9747	0.349107	4.17094	14.9382	0.000802744	0.0454681	20.8038	18.8211	20.3357	18.3186	19.0032	20.2821	15.8928	17.0727	14.967	16.4811	12.7458	15.1167
	ENSMUSG00000015605.7	Srf	0.345443	5.62482	28.9745	1.90226e-05	0.00489524	55.6883	55.7693	59.2945	50.0515	64.9106	63.4731	46.0285	46.8881	44.0908	46.7241	42.7408	48.4064
	ENSMUSG00000006445.4	Epha2	0.345123	6.40782	35.581	4.68359e-06	0.00182129	89.5071	91.9948	99.7756	97.0451	110.056	107.341	80.2887	80.9099	78.4578	79.781	66.3492	83.1829
	ENSMUSG00000028347.15	Tmeff1	0.34319	4.49805	26.8721	3.0919e-05	0.00676314	24.6601	22.0302	24.1419	23.1362	22.7123	28.1621	19.8247	20.4873	19.6621	20.6901	16.5122	16.9615
	ENSMUSG00000022074.7	Tnfrsf10b	0.336062	3.17336	18.5617	0.000268439	0.0253914	9.8945	10.9573	10.63	12.0008	11.661	9.12561	8.05637	9.15494	8.24617	7.6376	9.03397	8.78363
	ENSMUSG00000050846.10	Zfp623	0.332616	4.17528	41.0927	1.64176e-06	0.000820833	17.5056	19.804	20.4173	21.5784	18.3172	21.8256	14.6554	16.7016	15.5867	15.7481	16.2666	15.8601
	ENSMUSG00000028893.9	Sesn2	0.330953	4.36482	45.031	8.20809e-07	0.000531975	24.0766	24.3431	21.4232	21.9823	25.6085	25.8333	19.9897	19.844	18.7326	18.1127	17.3856	19.8527
	ENSMUSG00000030782.18	Tgfb1i1	0.329285	6.70936	22.2591	9.73479e-05	0.0144364	121.043	119.894	126.31	114.181	120.269	125.701	112.982	102.808	82.0327	104.183	83.8713	93.0955
	ENSMUSG00000072770.10	Acrbp	0.327955	2.95282	24.3703	5.67452e-05	0.0105637	7.15448	8.47093	9.05321	7.87554	7.69781	9.28808	6.10414	6.85383	6.84003	6.40802	6.1955	7.04893
	ENSMUSG00000029135.11	Fosl2	0.326838	6.40544	35.3709	4.88433e-06	0.00185806	89.1012	90.6649	104.86	101.113	102.231	78.0686	72.8922	80.1181	78.1241	71.0557	70.1702	78.915
	ENSMUSG00000043336.15	Filip1l	0.319343	6.80483	30.4522	1.36875e-05	0.00380185	115.487	130.764	131.204	127.134	130.659	113.921	106.85	103.797	94.5688	105.886	96.2077	93.068
	ENSMUSG00000004891.17	Nes	0.317751	7.68738	29.9497	1.5292e-05	0.00411685	229.755	208.998	243.621	224.871	247.371	221.425	197.367	201.433	174.123	188.977	153.878	188.256
	ENSMUSG00000050428.8	Fbxo46	0.311384	4.08895	23.5102	7.04766e-05	0.0117454	18.6473	19.5728	19.493	17.5685	20.2988	18.4949	15.3153	15.7366	14.1806	13.5727	17.0308	16.1355
	ENSMUSG00000048458.9	Inka2	0.308736	4.72775	40.3892	1.86683e-06	0.000902826	28.5926	29.8362	31.5911	29.0789	29.9529	29.6785	24.1141	27.2916	24.7147	24.2843	20.3605	23.4873
	ENSMUSG00000032332.18	Col12a1	0.307545	5.89259	19.8263	0.000187727	0.0201863	65.4813	60.5686	64.4328	63.639	64.9106	71.0552	53.0675	55.3255	49.5247	58.9017	48.1721	50.1686
	ENSMUSG00000032712.17	Resf1	0.307281	6.49977	15.7988	0.000612517	0.040144	108.459	98.7022	98.4435	101.747	107.846	69.9991	82.2409	80.4892	79.7209	81.6963	73.2543	75.5282
	ENSMUSG00000028410.14	Dnaja1	0.304895	6.71508	15.6656	0.00063841	0.0412234	102.522	112.984	114.049	122.432	137.163	109.561	88.2901	98.4775	111.705	90.729	89.7392	86.5973
	ENSMUSG00000007476.19	Lrrc8a	0.304822	6.10765	30.3143	1.41086e-05	0.00385761	76.6697	70.3983	84.0889	79.1593	83.9391	71.6509	63.4886	59.7545	66.303	58.6416	61.9823	67.0475
	ENSMUSG00000048482.15	Bdnf	0.304396	4.44452	19.6338	0.000198083	0.0206324	25.1422	22.7241	23.1904	24.2901	23.9572	26.6186	22.3818	18.9285	20.8299	18.7984	20.7154	16.5209
	ENSMUSG00000038612.17	Mcl1	0.299662	8.46332	55.1081	1.65597e-07	0.000160988	375.864	381.567	392.931	409.009	415.402	364.727	310.569	324.506	316.739	320.235	304.699	323.948
	ENSMUSG00000021532.12	Fastkd3	0.29229	3.14394	25.2413	4.57584e-05	0.00931078	10.0467	10.0899	9.97756	10.068	9.39996	8.55695	8.16635	8.18996	7.26902	8.27604	8.02413	7.54456
	ENSMUSG00000063889.17	Crem	0.290937	3.49975	23.1496	7.72772e-05	0.0126336	12.0002	12.027	12.6147	12.5778	12.5756	12.3209	9.70613	11.4808	11.2968	9.10364	9.33419	9.63721
	ENSMUSG00000032531.16	Amotl2	0.290212	8.20353	33.4611	7.20603e-06	0.00242497	287.245	284.86	328.199	306.656	326.102	341.845	252.909	243.719	239.473	263.343	256.909	276.946
	ENSMUSG00000044636.7	Csrnp2	0.288136	3.17771	31.8915	1.0024e-05	0.00313233	9.41246	9.62737	9.76007	10.4142	9.95888	9.96506	7.36896	8.31368	7.84101	8.03958	7.99684	8.86624
	ENSMUSG00000047040.10	Prr15l	0.28736	5.96878	42.3068	1.31978e-06	0.00067926	67.2826	68.3167	64.0793	68.1105	69.3819	72.9507	57.4119	59.2597	52.3608	57.483	49.3457	60.1913
	ENSMUSG00000018143.11	Mafk	0.285051	6.46296	26.3432	3.50578e-05	0.00739127	95.799	87.6582	96.8667	91.6217	104.848	101.654	83.7257	76.9262	76.3128	80.0175	73.7729	84.0365
	ENSMUSG00000022951.18	ENSMUSG00000022951.18	0.284697	5.64504	33.3151	7.42769e-06	0.0024524	51.0962	52.7915	54.9174	53.0517	57.543	60.359	43.6913	51.2924	43.4235	43.3428	42.0039	46.947
	ENSMUSG00000074221.13	Zfp568	0.28421	4.17599	19.7778	0.000190279	0.0201863	17.9877	20.4979	20.6076	22.3285	21.3659	20.5259	18.3674	17.3202	16.8498	16.8122	18.0679	13.8225
	ENSMUSG00000040511.15	Pvr	0.282642	5.31893	24.4467	5.56745e-05	0.0104758	39.9585	43.222	42.7649	47.5706	44.2814	49.3379	33.9577	33.4032	38.8714	36.6274	36.1632	40.5589
	ENSMUSG00000037990.19	Sh3rf3	0.276191	3.90169	17.7602	0.000338835	0.0290651	16.0595	15.2361	16.0674	16.7031	16.9961	16.2203	14.3255	13.9798	12.4169	15.3461	10.6988	13.5472
	ENSMUSG00000033082.11	Clec1a	0.276141	7.07781	20.7402	0.000146009	0.017993	139.842	140.305	132.182	145.77	139.932	151.886	128.077	130.05	98.6204	125.772	107.07	112.26
	ENSMUSG00000049717.10	Lig4	0.275698	3.47967	20.4345	0.000158714	0.0187658	13.2941	10.7838	12.5875	12.0008	11.7118	10.29	8.77126	9.97146	9.79531	10.3096	9.25231	10.2705
	ENSMUSG00000047777.10	Phf13	0.274008	4.62807	40.1447	1.95276e-06	0.000902826	28.3896	26.4536	28.0568	27.6077	27.2853	27.4851	23.8391	23.7286	22.4982	22.9128	20.7154	22.9916
	ENSMUSG00000049866.13	Arl4c	0.270533	6.0734	24.0947	6.07975e-05	0.0110822	71.9507	78.609	76.0959	75.4667	74.6662	72.5175	66.4031	68.1177	61.1313	66.0901	56.4418	54.2162
	ENSMUSG00000029186.13	Pi4k2b	0.268536	6.59926	18.6958	0.000258304	0.0245974	110.869	104.773	101.298	117.412	116.407	121.449	85.128	94.3454	100.456	95.8838	81.988	100.2
	ENSMUSG00000046080.18	Clec9a	0.26602	5.50709	18.4289	0.000278899	0.0258225	45.0834	48.3681	45.3476	49.2726	50.4295	51.0168	43.0039	41.7663	35.4156	43.532	37.8553	39.1822
	ENSMUSG00000031613.10	Hpgd	0.260929	8.74786	17.4496	0.000371343	0.0303651	451.62	429.357	433.603	433.357	441.824	464.865	389.263	377.456	343.908	397.132	334.039	373.621
	ENSMUSG00000009013.6	Dynll1	0.260148	7.28052	18.2225	0.000296064	0.0270488	168.714	167.973	154.312	156.818	159.952	164.721	141.193	145.044	139.875	140.338	123.637	121.897
	ENSMUSG00000005148.9	Klf5	0.259769	5.45252	21.1268	0.000131506	0.0169749	47.7219	46.9515	47.9847	51.0324	54.4436	41.485	36.8723	45.1809	39.4434	43.9103	38.4285	37.9982
	ENSMUSG00000048696.12	Mex3d	0.259268	4.37599	21.2687	0.000126586	0.0167755	23.4423	21.1339	24.4681	22.6746	23.1442	23.667	20.3746	22.1203	20.6869	19.0585	16.867	16.6035
	ENSMUSG00000021270.14	Hsp90aa1	0.2578	8.62616	20.4815	0.000156681	0.0187658	380.025	408.137	389.886	410.538	407.73	393.593	339.055	348.581	343.503	323.948	335.321	308.391
	ENSMUSG00000030878.12	Cdr2	0.257208	5.13024	20.1116	0.000173452	0.0196795	34.7322	35.0691	38.1431	40.0701	38.7431	37.721	27.4136	31.399	35.94	28.6587	30.9502	33.4274
	ENSMUSG00000027858.14	Tspan2	0.255983	7.47142	15.5795	0.000655805	0.0415314	196.799	174.391	177.068	189.186	184.29	184.543	163.657	151.997	155.652	166.679	135.346	153.067
	ENSMUSG00000025198.17	Erlin1	0.254418	4.95407	36.5786	3.84551e-06	0.00156494	33.9457	36.6881	35.8866	37.5314	33.7891	32.3052	27.2762	29.1226	32.365	28.8243	29.4218	29.1044
	ENSMUSG00000024878.10	Cbwd1	0.253305	2.99612	14.4323	0.00094415	0.0494661	8.49912	8.58657	7.06857	8.5679	8.20591	8.80066	6.48909	7.59613	7.72185	6.97552	6.35926	6.55331
	ENSMUSG00000047030.16	Spata2	0.247312	5.02323	60.5194	7.63617e-08	8.93411e-05	33.692	34.5776	36.5119	36.2044	33.7128	36.0963	30.7407	28.702	29.2906	29.3681	30.1587	29.3247
	ENSMUSG00000003518.14	Dusp3	0.242567	7.88369	36.1166	4.21135e-06	0.00167487	261.291	245.715	250.907	263.297	254.485	249.939	222.636	226.424	222.79	218.582	192.879	206.181
	ENSMUSG00000016520.8	Lnx2	0.242379	5.58073	38.7475	2.53423e-06	0.00113709	48.5084	48.3392	53.2862	52.7344	54.5706	54.51	43.2514	46.8139	41.8028	45.5418	41.6218	44.6616
	ENSMUSG00000036052.15	Dnajb5	0.240253	5.04584	17.5083	0.000364946	0.0300168	37.6498	35.1558	35.5876	36.2044	35.5674	35.1485	36.7348	31.5474	29.1953	28.6351	27.3475	28.8566
	ENSMUSG00000062825.16	Actg1	0.23969	10.5128	21.0878	0.000132897	0.0169749	1626.02	1662.96	1497.91	1640.88	1753.8	1825.53	1383.3	1434.06	1332.71	1411.47	1400.27	1513.51
	ENSMUSG00000007659.19	Bcl2l1	0.239309	6.8611	20.939	0.000138345	0.0174166	117.06	117.697	115.191	121.855	132.565	148.014	105.558	112.136	101.48	108.416	98.6368	111.158
	ENSMUSG00000048546.9	Tob2	0.239191	6.12731	38.2791	2.76944e-06	0.00121156	75.1474	76.036	83.7354	73.4474	79.6964	72.5987	65.7432	65.8661	63.6576	67.0359	65.6942	62.2839
	ENSMUSG00000062127.12	Cttnbp2nl	0.239035	7.39027	24.9153	4.95722e-05	0.00953257	176.477	176.27	180.901	203.408	191.658	184.354	147.187	156.871	171.215	147.408	153.277	167.137
	ENSMUSG00000045822.5	Zswim3	0.238761	2.92456	14.3456	0.000971014	0.0498293	7.76337	8.35528	8.4551	8.42366	8.45997	7.60919	7.58893	6.11154	6.14888	7.40114	6.79595	7.54456
	ENSMUSG00000032135.16	Mcam	0.237555	7.99825	27.7714	2.5053e-05	0.00592435	265.122	258.898	287.473	284.904	289.824	287.931	244.771	240.107	232.442	238.87	210.947	252.853
	ENSMUSG00000051306.8	Usp42	0.236827	4.51381	19.4601	0.000207963	0.0211578	25.6496	22.6084	28.1927	25.5306	23.6523	23.8566	22.9043	23.7781	21.0921	19.2241	19.2961	20.5686
	ENSMUSG00000036863.13	Syde2	0.235397	4.49631	23.7994	6.54922e-05	0.0112375	24.8377	24.3142	26.1537	24.1459	26.8026	23.3421	19.8522	22.343	22.0931	20.6428	20.5243	21.6149
	ENSMUSG00000049516.10	Spty2d1	0.234577	5.19859	19.5312	0.000203854	0.021108	38.9945	38.3071	39.4481	40.8778	41.2328	34.0653	32.5554	33.6011	33.8188	32.844	31.9055	33.2346
	ENSMUSG00000056962.12	Jmjd6	0.232184	5.45221	47.324	5.58649e-07	0.000391032	45.5401	46.5756	49.3713	46.5897	49.0068	47.3611	41.2167	40.9993	40.7304	39.9851	39.3837	39.843
	ENSMUSG00000040158.13	Tax1bp3	0.232154	6.78802	21.1112	0.000132059	0.0169749	115.994	123.537	112.064	110.517	120.599	141.515	107.812	107.88	98.8587	105.555	95.9348	100.53
	ENSMUSG00000026627.8	Pacc1	0.230451	3.57525	14.5837	0.00089917	0.0483087	12.3554	13.3569	11.9078	12.2316	12.0421	13.2687	10.366	11.3323	10.5818	10.1204	10.4805	11.1792
	ENSMUSG00000068566.14	Myadm	0.230125	8.27892	15.9259	0.000588865	0.0393033	325.859	333.344	330.13	337.235	363.27	327.249	270.369	296.966	276.557	311.321	262.504	301.948
	ENSMUSG00000049969.4	Plekhf2	0.228498	5.55886	19.711	0.000193857	0.0203132	50.3604	49.4089	50.6491	52.7633	52.1825	47.0903	41.6291	46.2448	46.0689	44.667	37.8553	41.6052
	ENSMUSG00000021365.16	Nedd9	0.225045	7.58823	19.7748	0.000190439	0.0201863	186.473	204.488	213.281	213.332	213.481	216.902	185.434	185.276	166.449	188.906	159.009	182.611
	ENSMUSG00000060935.7	Tmem263	0.224805	3.81485	16.3224	0.0005213	0.0370822	14.8925	13.7038	14.0012	15.7222	16.3356	13.729	11.7134	12.5942	13.6324	13.1944	12.3364	12.1429
	ENSMUSG00000031840.15	Rab3a	0.224205	4.36242	19.8925	0.000184305	0.0201863	22.3007	22.1169	22.0213	21.5784	23.0172	23.9378	18.8898	16.4789	19.114	21.2103	19.9239	19.9353
	ENSMUSG00000026921.21	Egfl7	0.22276	8.7726	15.8614	0.000600744	0.0395204	494.446	477.957	483.001	485.514	466.467	498.686	437.931	446.044	413.095	392.639	360.24	440.338
	ENSMUSG00000020495.14	Smg8	0.221885	4.64774	31.5768	1.07226e-05	0.00323507	23.3409	26.4247	28.7093	27.3192	26.2437	28.2975	22.8218	23.11	23.3085	23.0074	23.008	22.1931
	ENSMUSG00000038059.8	Smim3	0.221479	4.85328	17.5735	0.000357982	0.0299406	30.8252	31.9467	28.5734	31.0983	30.3085	32.4948	29.8333	26.8957	25.239	26.2469	23.6903	26.9842
	ENSMUSG00000094870.9	Zfp131	0.220459	5.22932	20.2673	0.000166168	0.0192567	38.4617	38.3938	39.8559	43.0991	40.2674	37.9647	31.648	34.7145	37.2269	35.0431	32.0146	33.5926
	ENSMUSG00000022114.6	Spry2	0.220453	5.13817	19.755	0.000191492	0.0201863	36.7111	34.7799	39.8831	38.0219	42.1982	39.8332	36.3499	33.6011	29.8864	32.0401	31.0321	35.7954
	ENSMUSG00000025340.15	Rabgef1	0.220319	5.76932	42.4923	1.27694e-06	0.000677129	54.851	56.4054	58.9682	56.5712	60.5408	59.4383	50.2079	52.8512	49.6439	50.1055	46.3434	48.489
	ENSMUSG00000056216.10	Cebpg	0.218866	6.51412	17.3167	0.000386284	0.0311501	99.9598	95.84	92.7343	103.824	97.658	86.3548	74.322	85.6358	88.3246	89.2393	77.2118	80.4294
	ENSMUSG00000026034.18	Clk1	0.21837	7.7065	16.2369	0.000535122	0.0374197	225.189	204.459	241.473	243.796	232.586	212.272	189.421	199.998	196.168	205.269	189.468	188.421
	ENSMUSG00000020577.18	Tspan13	0.215988	7.96081	18.3768	0.000283132	0.0260764	275.727	247.276	248.596	261.451	257.838	301.93	235.862	226.746	234.706	233.29	215.314	225.428
	ENSMUSG00000032640.11	Chsy1	0.210658	5.69653	16.9256	0.000434188	0.0330149	53.9377	53.8323	59.4032	60.5523	55.1549	61.8213	45.891	49.8326	52.0271	51.5006	48.8544	49.7005
	ENSMUSG00000024843.16	Chka	0.20562	6.19056	27.0143	2.98993e-05	0.00670778	79.7902	74.8795	74.7638	81.0344	80.9921	77.7166	66.6506	69.825	69.8065	72.2143	61.8458	66.4692
	ENSMUSG00000023944.15	Hsp90ab1	0.204166	10.0877	14.9667	0.000795495	0.0454681	999.547	1103.88	1109.2	1079.87	1103.71	1229.49	978.45	963.446	952.957	937.58	991.089	927.844
	ENSMUSG00000042364.12	Snx18	0.203001	6.13809	52.2941	2.53191e-07	0.00021098	71.697	72.769	75.8241	73.7647	73.7516	74.9816	64.6984	63.367	63.9436	64.7895	66.2127	61.6506
	ENSMUSG00000060427.16	Zfp868	0.202622	3.72622	17.6927	0.000345626	0.0292179	13.5225	14.1086	14.3003	14.3087	14.0491	13.4041	11.6859	11.6292	13.1557	12.6269	11.6814	11.9226
	ENSMUSG00000020823.17	Sec14l1	0.201858	7.92484	19.2273	0.000222056	0.0220782	248.047	256.816	253.408	258.941	264.952	253.486	234.872	235.925	231.727	223.642	196.946	211.991
	ENSMUSG00000020257.14	Wdr82	0.200869	6.29169	42.9314	1.18149e-06	0.000652059	80.6021	82.6855	87.1881	85.6501	82.1353	89.1981	71.325	75.021	76.003	72.3562	73.4999	73.2704
	ENSMUSG00000042842.12	Serpinb6b	0.199363	7.02001	19.7811	0.000190108	0.0201863	136.163	136.084	125.141	127.653	130.659	146.497	108.802	118.891	121.381	117.401	109.854	122.31
	ENSMUSG00000032714.7	Syde1	0.199321	6.74804	22.8355	8.3789e-05	0.0132092	111.453	105.843	121.226	111.527	116.255	126.459	101.791	104.193	100.074	101.89	95.7437	99.6763
	ENSMUSG00000010067.14	Rassf1	0.19889	5.91388	27.5593	2.6318e-05	0.00614052	63.9337	62.39	66.6077	64.3602	65.4695	74.6025	61.3164	58.8885	58.9148	53.676	55.3774	58.0436
	ENSMUSG00000037104.10	Socs5	0.196134	5.74738	23.1148	7.79716e-05	0.0126336	56.9822	57.7353	58.207	58.2156	56.5776	58.9509	54.6073	52.4058	48.5952	52.3755	45.3336	49.2599
	ENSMUSG00000037754.14	Ppp1r16b	0.19358	7.44256	14.4736	0.00093163	0.0493592	170.87	168.985	187.535	176.695	181.318	195.808	162.997	159.172	164.399	162.754	138.321	157.775
	ENSMUSG00000018920.12	Cxcl16	0.19327	6.29176	15.9684	0.000581191	0.0391164	83.4943	83.6974	80.3099	83.3134	83.2024	98.3779	77.8415	81.281	68.591	76.9908	67.0588	76.3818
	ENSMUSG00000051675.14	Trim32	0.192608	4.46935	16.9131	0.000435821	0.0330149	21.7172	22.088	22.1029	22.8477	23.2967	26.6728	18.9173	20.1904	20.4248	20.4773	20.1968	21.1743
	ENSMUSG00000020482.5	Ccdc117	0.191225	5.50077	14.3567	0.000967515	0.0497957	48.0771	46.6335	48.3382	50.7439	49.1085	44.0304	37.8347	43.1767	44.782	42.1369	42.3314	40.9995
	ENSMUSG00000022744.13	Cldnd1	0.189017	5.47761	16.9726	0.000428099	0.0330149	45.5401	49.6402	43.662	44.253	44.8404	48.7151	37.9996	42.9292	43.6141	40.2925	39.1108	38.659
	ENSMUSG00000017615.13	Tnfaip1	0.188194	7.69968	30.5866	1.32903e-05	0.00380185	215.573	216.11	225.216	227.612	225.066	247.339	201.437	205.145	192.498	195.669	189.604	206.622
	ENSMUSG00000018965.12	Ywhah	0.186194	7.36778	14.4423	0.000941087	0.0494537	178.507	186.621	166.057	175.224	176.821	177.719	152.604	169.045	156.868	162.825	143.697	147.394
	ENSMUSG00000027601.14	Mtfr1	0.183483	4.90452	15.8641	0.00060024	0.0395204	27.6285	31.7443	32.1076	33.4638	32.3664	33.28	28.2935	27.4648	28.9569	27.8548	28.876	26.3509
	ENSMUSG00000020385.17	Clk4	0.182948	5.98347	24.9418	4.92495e-05	0.00953257	69.2615	66.4953	67.369	70.1298	69.8646	65.6665	61.2614	61.3628	61.1075	61.9284	58.4069	56.006
	ENSMUSG00000071856.11	Mcc	0.182787	6.57256	22.1733	9.95638e-05	0.0145189	91.4353	93.2669	100.917	100.017	96.5148	91.6623	83.5882	84.5966	82.1519	82.1929	83.2435	89.7638
	ENSMUSG00000015932.9	Dstn	0.182684	8.53592	23.7052	6.70729e-05	0.0113952	401.006	398.741	367.593	396.172	391.851	388.366	343.812	351.278	345.291	353.789	322.548	348.234
	ENSMUSG00000017978.19	Cadps2	0.181648	5.23763	14.5928	0.000896533	0.0483087	39.4258	35.7051	44.233	41.0509	41.2328	39.7248	37.1198	36.3971	34.5815	37.9752	32.6151	34.1157
	ENSMUSG00000037253.9	Mex3c	0.18145	5.65013	15.4731	0.000677995	0.0418265	50.5888	52.4735	55.4611	54.3499	53.5798	47.5777	47.4858	46.8634	46.9031	45.6837	42.9864	46.9745
	ENSMUSG00000006134.5	Crkl	0.181319	6.29455	27.0872	2.93911e-05	0.00667941	80.1454	81.5001	87.3785	82.3326	87.9278	83.6469	73.3597	76.951	74.0725	75.5957	71.7259	71.811
	ENSMUSG00000062098.12	Btbd3	0.180833	6.67504	16.0962	0.000558735	0.0384432	102.497	100.842	104.561	102.469	111.072	102.304	95.659	91.0545	92.0664	99.1469	83.3254	88.9928
	ENSMUSG00000020986.14	Sec23a	0.180207	5.00237	22.5051	9.12891e-05	0.0141369	33.9457	34.8956	35.1254	33.5504	34.6274	32.1427	28.596	31.3	31.1972	28.0676	30.0768	31.0594
	ENSMUSG00000030522.15	Mtmr10	0.180172	5.65434	16.0428	0.000567999	0.0385248	55.6629	51.2014	49.2897	56.0808	52.5636	54.9703	47.2109	47.3583	46.2358	50.1291	44.5694	46.6992
	ENSMUSG00000026889.13	Rbm18	0.180014	5.35896	23.7988	6.55024e-05	0.0112375	44.0432	42.2679	42.7649	42.2914	42.5285	42.866	36.4599	36.1249	36.8933	38.7319	39.9569	38.4938
	ENSMUSG00000047821.17	Trim16	0.179602	6.81556	15.9276	0.000588564	0.0393033	121.652	116.425	116.115	118.422	120.015	125.105	104.953	113.917	110.084	102.386	95.4708	106.89
	ENSMUSG00000022895.17	Ets2	0.179584	7.92271	23.6401	6.8188e-05	0.0114733	258.475	250.485	271.161	264.797	258.855	268.19	238.144	225.434	237.232	230.641	214.85	241.674
	ENSMUSG00000060733.14	Ipmk	0.179056	5.77727	30.5065	1.35254e-05	0.00380185	57.2866	59.1808	61.0344	58.5617	57.9241	57.4886	51.1978	52.3811	53.481	49.7508	51.0651	52.5641
	ENSMUSG00000042406.9	Atf4	0.177544	7.43081	15.4468	0.000683604	0.0418265	196.215	178.988	186.121	175.426	185.764	179.29	175.068	165.853	159.609	155.613	160.401	157.72
	ENSMUSG00000031799.11	Tpm4	0.176366	8.68477	22.3194	9.58227e-05	0.0144362	424.702	431.323	409.624	443.136	439.639	456.957	375.735	393.588	385.449	387.011	370.829	392.951
	ENSMUSG00000036299.6	BC031181	0.17623	5.84539	15.0641	0.000771266	0.0451384	58.9864	59.8169	57.772	58.1002	55.6122	69.3492	55.4047	55.5977	51.765	52.7538	51.147	51.6004
	ENSMUSG00000028890.14	Mtf1	0.175831	5.01412	18.0641	0.000310015	0.0275378	30.952	33.4789	34.9623	36.2621	37.2188	32.3864	28.596	30.1866	31.6024	29.4154	31.6052	30.2884
	ENSMUSG00000000555.9	Itga5	0.173977	6.05278	15.2754	0.000721436	0.0435324	66.9274	67.7674	76.2319	73.8224	76.0635	79.3414	65.2758	61.4371	67.3993	61.1954	63.8928	70.985
	ENSMUSG00000052423.16	B4galt3	0.172518	5.62139	20.1933	0.000169589	0.019524	52.0095	51.8953	49.7247	52.5613	50.4549	55.4306	49.3281	47.7294	44.3768	48.2611	42.7135	44.4689
	ENSMUSG00000028191.12	Bcl10	0.172469	5.24255	20.8668	0.000141077	0.0176337	39.7809	41.7186	40.7531	41.6856	38.108	41.8912	38.0271	38.8961	33.4137	36.1308	34.4164	35.5476
	ENSMUSG00000001098.16	Kctd10	0.172195	8.74365	16.9577	0.000430025	0.0330149	457.709	428.027	450.975	426.231	461.589	489.209	415.439	417.144	402.275	416.994	348.968	407.599
	ENSMUSG00000050213.7	Snip1	0.17053	4.55036	16.2141	0.000538874	0.0374197	24.9646	26.0777	26.4528	25.4729	23.0934	24.019	21.3645	22.9368	22.9034	21.7542	21.2612	23.1018
	ENSMUSG00000020922.12	Lsm12	0.168716	4.71514	16.8143	0.000448988	0.0334345	28.3135	28.3039	28.7637	27.6077	27.0058	27.4039	26.7262	23.7039	25.6918	23.5039	25.6281	23.68
	ENSMUSG00000053931.12	Cnn3	0.168699	7.47046	19.299	0.000217604	0.0218842	185.129	174.391	182.995	183.416	186.78	204.04	168.166	161.102	172.169	165.308	159.882	166.889
	ENSMUSG00000030203.18	Dusp16	0.167274	6.06435	17.5102	0.000364747	0.0300168	67.3841	66.5242	69.3536	75.3513	71.8208	71.0281	64.7534	64.8764	66.4222	59.2091	60.836	59.2
	ENSMUSG00000029364.16	Wsb2	0.166475	6.27872	15.4921	0.000673974	0.0418265	80.9065	80.6617	78.3252	77.1399	83.7105	90.1459	74.487	77.9407	71.0696	73.3257	67.9049	72.6646
	ENSMUSG00000052040.11	Klf13	0.166463	7.54063	15.1638	0.000747309	0.0444801	188.122	197.491	194.032	215.121	204.132	214.357	183.427	183.074	181.034	185.312	167.142	181.014
	ENSMUSG00000024048.16	Myl12a	0.165162	8.5253	15.4581	0.000681184	0.0418265	414.909	365.609	379.175	372.516	393.376	422.946	355.387	333.265	362.498	357.927	332.21	353.218
	ENSMUSG00000028024.15	Enpep	0.163615	7.65	15.3622	0.000702002	0.0428026	202.203	201.047	205.478	206.178	200.448	241.328	190.053	198.44	182.56	195.102	172.71	183.052
	ENSMUSG00000030774.14	Pak1	0.159174	4.68004	17.9724	0.000318415	0.0277708	27.8568	26.8872	26.2625	26.3095	26.8788	29.2994	23.4817	26.2029	23.1655	25.2301	24.2907	24.038
	ENSMUSG00000048285.10	Frmd6	0.15842	6.62399	18.6913	0.000258639	0.0245974	105.694	105.41	101.652	107.373	104.263	98.8653	94.8891	90.6092	95.1885	93.5665	90.367	93.8114
	ENSMUSG00000038145.18	Snrk	0.157745	7.81674	21.5392	0.000117749	0.0159728	233.206	225.072	230.109	241.344	253.342	242.465	213.205	210.811	218.905	208.249	205.352	221.381
	ENSMUSG00000047539.10	Fbxo28	0.156183	5.38949	34.4913	5.83263e-06	0.0020413	44.1447	44.4073	43.8523	44.253	43.4177	45.1948	39.6219	40.6034	39.7532	38.59	41.922	37.5576
	ENSMUSG00000038267.16	Slc22a23	0.155064	7.01262	17.9663	0.000318985	0.0277708	131.166	134.176	134.33	134.23	136.172	144.331	123.733	125.72	113.182	128.35	116.323	124.1
	ENSMUSG00000038244.15	Mical2	0.154399	7.83026	16.6414	0.000473073	0.0343735	223.007	236.174	229.43	234.737	240.36	235.695	219.969	211.479	196.001	220.001	195.008	214.91
	ENSMUSG00000035275.15	Raver2	0.153964	5.96218	23.8596	6.45042e-05	0.0112375	64.4918	62.3032	64.2425	65.4564	63.6911	67.8057	58.3743	58.5174	59.9873	60.7461	55.4593	55.593
	ENSMUSG00000040822.8	1700123O20Rik	0.153921	4.54861	16.2147	0.000538774	0.0374197	24.5079	24.5165	23.4079	24.9248	23.8302	27.1873	20.5946	22.8379	23.3324	22.1561	21.7252	22.6888
	ENSMUSG00000003269.19	Cyth2	0.153747	5.6565	17.131	0.000408269	0.0323569	50.259	54.3527	53.3949	50.715	53.9101	58.4906	49.2456	49.214	47.3321	50.9331	44.624	47.2774
	ENSMUSG00000027829.16	Ccnl1	0.153066	6.43507	23.4108	7.2283e-05	0.0119328	87.8073	91.4744	91.8643	92.6891	89.4013	84.8113	81.8835	80.7862	81.0079	81.5544	77.2937	81.3381
	ENSMUSG00000009630.11	Ppp2cb	0.152351	6.33695	21.2418	0.000127501	0.0167755	83.1138	86.7908	83.9801	84.1789	82.8213	92.1226	81.6635	75.219	74.8114	77.5819	74.5371	77.7861
	ENSMUSG00000043895.7	S1pr2	0.150162	6.16914	14.8814	0.000817398	0.0461408	74.1326	78.0886	74.3832	78.0919	73.0402	86.2194	70.6376	71.9529	70.0686	72.0961	63.2651	70.0213
	ENSMUSG00000025871.19	4833439L19Rik	0.149212	7.12561	22.9169	8.20454e-05	0.0131717	144.003	142.358	137.674	145.308	145.039	151.805	128.077	131.089	132.368	128.846	124.865	135.83
	ENSMUSG00000000184.13	Ccnd2	0.149165	7.32034	15.9158	0.000590707	0.0393033	161.991	162.653	166.682	170.781	159.926	171.004	153.071	151.18	152.959	151.688	139.058	147.504
	ENSMUSG00000022285.18	Ywhaz	0.148672	8.59487	26.6801	3.23565e-05	0.0069902	409.505	407.096	417.97	418.413	405.621	394.811	367.816	383.518	371.054	374.834	354.344	361.588
	ENSMUSG00000023186.15	Vwa5a	0.147976	6.48317	28.4455	2.14532e-05	0.00521402	89.1519	90.8673	90.3146	92.891	93.085	90.6874	80.1787	85.042	85.0833	83.8717	80.023	79.4382
	ENSMUSG00000034826.15	Nup54	0.144895	4.40454	15.0142	0.000783567	0.0453728	22.732	22.8975	23.4894	22.6169	22.001	21.4465	19.3573	20.413	21.1636	19.6497	19.9512	21.725
	ENSMUSG00000024240.14	Epc1	0.14427	5.80856	19.9353	0.000182129	0.0201863	55.6883	56.3765	60.3004	63.2063	61.5062	58.0031	56.2846	50.9955	52.5991	55.7096	53.9855	51.7105
	ENSMUSG00000015290.16	Ubl4a	0.139462	5.54709	15.036	0.000778163	0.0452394	49.5232	49.4956	49.8606	47.6571	46.8474	48.8775	44.6262	46.3685	45.3301	41.0491	45.2244	42.7342
	ENSMUSG00000029726.17	Mepce	0.136673	6.02217	19.4624	0.000207829	0.0211578	68.9824	67.3048	70.7673	69.1778	67.5781	71.5968	61.6188	63.8866	61.4888	62.8506	67.2226	60.7971
	ENSMUSG00000023809.11	Rps6ka2	0.136341	5.6827	14.6571	0.000878206	0.0478745	51.8573	57.7064	53.2862	53.2825	49.9976	55.9181	50.9228	49.5109	47.6181	47.3626	47.2168	50.3613
	ENSMUSG00000033530.9	Ttc7b	0.136156	5.54533	20.3955	0.000160419	0.0188401	48.1532	47.5008	51.5734	48.4937	48.4987	53.3997	45.7536	44.8097	45.3778	44.194	44.16	46.534
	ENSMUSG00000018736.15	Ndel1	0.135468	6.18316	17.1279	0.000408645	0.0323569	71.6209	77.655	74.9269	78.0919	78.7564	81.6702	68.1904	68.6621	72.7141	70.6301	69.1331	71.8936
	ENSMUSG00000033623.14	Pcgf3	0.135016	5.6626	17.2629	0.000392516	0.0315075	52.6184	49.6113	54.7815	53.7152	54.3165	51.9374	47.5408	48.1995	48.762	49.2542	48.3358	46.5615
	ENSMUSG00000074030.4	Exoc8	0.13164	4.94072	14.6716	0.00087411	0.0478002	32.5504	33.132	32.1076	31.7907	32.4934	30.2201	28.4585	30.4835	30.8636	29.3208	27.5932	28.774
	ENSMUSG00000018541.11	Cwc25	0.131133	4.78878	18.1467	0.000302652	0.0271595	28.8463	29.6627	29.7152	28.1846	27.768	29.3536	27.0837	25.7081	26.5498	26.6725	27.3475	25.0843
	ENSMUSG00000032186.16	Tmod2	0.129988	6.16059	14.5344	0.000913557	0.0487388	75.6548	66.8712	72.4257	74.3705	73.1165	67.2912	64.4509	66.7816	69.592	64.8368	63.8109	63.2201
	ENSMUSG00000042608.16	Stk40	0.129973	6.33639	18.1861	0.000299208	0.0270488	84.6867	83.2059	86.8075	86.8041	90.7223	91.3644	78.4465	77.7675	85.846	78.1731	77.4574	80.7874
	ENSMUSG00000026342.11	Slc35f5	0.122436	5.42216	15.0059	0.000785643	0.0453728	46.1743	44.0604	44.9398	46.6763	45.6025	42.1349	39.7044	41.9643	43.3997	41.2383	39.0835	42.2385
	ENSMUSG00000045639.15	Zfp629	0.122254	5.52782	14.6838	0.000870718	0.0478002	44.2208	47.6453	50.4044	47.6283	47.4571	48.0922	43.8288	44.9087	42.8515	43.1773	43.6414	43.8356
	ENSMUSG00000038485.7	Socs7	0.121812	5.69767	16.4094	0.000507626	0.0362569	52.111	51.4616	56.0049	55.0134	56.5014	50.5835	47.7883	50.2779	49.6677	49.94	49.4003	48.544
	ENSMUSG00000026927.18	Entr1	0.121611	6.35142	15.0373	0.000777852	0.0452394	80.8051	84.0154	80.6089	88.3042	85.7937	86.5173	77.4291	78.2871	79.1966	74.5553	77.1572	78.502
	ENSMUSG00000062421.14	Arf2	0.11979	5.85881	15.3305	0.000709021	0.0429313	61.625	60.424	62.7744	63.2928	61.7857	66.3705	57.7969	59.5813	59.1532	56.4662	55.7595	57.5204
	ENSMUSG00000014402.16	Tsg101	0.108186	5.7012	15.4576	0.000681282	0.0418265	54.9018	51.1725	54.4552	54.3787	53.5798	54.8078	47.3758	48.7686	53.2426	51.6661	49.0182	49.8382
	ENSMUSG00000044600.15	Smim7	0.108069	6.32656	14.764	0.000848636	0.0472194	86.0567	87.1956	81.5877	80.6017	82.5926	89.1169	75.8343	79.4995	79.3634	78.6933	76.7751	80.3744
	ENSMUSG00000027879.10	Sec22b	0.104472	5.95143	17.6282	0.00035226	0.0296356	64.1874	67.3048	63.2637	62.7159	59.7533	64.9354	61.1239	59.3339	57.3895	57.9086	60.0445	59.6681
	ENSMUSG00000029512.12	Ulk1	0.103592	6.43767	14.3909	0.000956876	0.0495396	84.839	86.9643	94.447	88.8234	89.6807	90.4167	81.6635	82.5677	83.3197	84.0372	81.9062	84.5872
	ENSMUSG00000004394.13	Tmed4	0.100544	6.44461	15.196	0.000739738	0.0443037	92.0949	87.9762	89.0369	87.4387	88.9186	94.0723	83.6707	84.9183	83.844	82.1219	84.035	84.6423
	ENSMUSG00000020088.11	Sar1a	0.100421	7.4391	15.454	0.000682049	0.0418265	185.027	177.745	177.802	173.002	176.796	183.297	165.747	169.886	169.07	163.109	163.976	169.698
	ENSMUSG00000029064.16	Gnb1	0.0968924	8.74487	14.6896	0.000869083	0.0478002	437.261	440.43	437.762	436.674	438.14	466.191	413.899	415.288	410.998	412.028	406.201	425.497
	ENSMUSG00000041528.16	Rnf123	-0.0927266	5.90339	14.5476	0.000909664	0.0486796	59.2909	55.5091	59.0498	57.9559	58.6608	57.3262	62.5537	59.0865	63.2524	63.5127	60.836	61.6506
	ENSMUSG00000025159.9	Mms19	-0.120297	5.97379	17.1017	0.000411863	0.0324649	64.0098	59.0074	59.7838	58.9945	59.0165	61.0901	67.8879	66.4104	66.2315	63.2526	66.7586	62.8622
	ENSMUSG00000006281.9	Tep1	-0.120639	5.5327	14.7898	0.000841646	0.0470542	45.8952	46.6045	42.2483	44.1954	43.3669	45.7093	49.0256	47.9026	50.2873	46.6768	49.4003	48.1035
	ENSMUSG00000042688.17	Mapk6	-0.125073	6.06037	17.3491	0.000382588	0.0309949	62.2338	64.9052	62.5569	64.2448	63.437	62.5253	68.4654	68.3899	64.3011	72.569	69.6516	70.9299
	ENSMUSG00000005198.16	Polr2a	-0.133074	8.2085	16.9412	0.000432158	0.0330149	278.822	280.697	305.825	288.078	287.385	288.933	320.66	321.784	320.743	313.189	314.06	306.436
	ENSMUSG00000052056.15	Zfp217	-0.142045	5.84908	16.9417	0.000432091	0.0330149	54.0899	55.3357	56.6845	55.9365	51.4711	54.8078	61.6188	60.8432	61.3935	63.9146	55.9506	58.5117
	ENSMUSG00000027014.15	Cwc22	-0.146128	4.95418	18.9462	0.000240479	0.0233786	30.7998	29.4025	29.7696	31.3002	28.3269	28.6225	33.0228	32.364	33.3183	31.709	33.0245	33.7853
	ENSMUSG00000042404.17	Dennd4b	-0.146568	5.45774	17.7113	0.000343745	0.0292	42.0643	45.0723	44.4776	43.7626	40.369	40.9975	48.2282	47.8779	44.925	47.3626	50.4374	45.35
	ENSMUSG00000016028.12	Celsr1	-0.149606	5.8024	21.9946	0.000104358	0.0147271	50.056	53.7745	52.7696	51.9267	54.4944	50.3939	58.1818	58.1957	57.4372	61.3609	55.7595	56.6944
	ENSMUSG00000025047.10	Pdcd11	-0.151782	5.81115	20.697	0.000147734	0.0180783	54.1407	52.5313	55.1893	52.9075	56.5776	55.4848	62.5537	56.7606	59.9873	60.2259	63.6472	59.971
	ENSMUSG00000022394.15	L3mbtl2	-0.152643	4.76109	16.6391	0.0004734	0.0343735	25.9033	27.5233	25.8819	25.5595	24.948	26.3749	27.7711	29.0484	30.9589	27.4055	28.8214	29.6
	ENSMUSG00000052798.14	Nup107	-0.155489	4.25787	16.4345	0.000503757	0.0361281	17.6832	20.151	18.5686	18.1743	17.5805	17.9263	20.0997	19.3491	20.0196	20.5955	21.9435	20.5961
	ENSMUSG00000039747.12	Orai2	-0.160463	5.25839	16.6936	0.000465654	0.034094	35.5694	37.3819	37.2731	38.0795	34.3988	35.7984	39.9244	42.6818	38.3232	42.7989	39.875	40.5589
	ENSMUSG00000030083.12	Abtb1	-0.167259	5.55735	17.7897	0.000335913	0.0290007	44.4999	45.5348	43.9883	43.8203	42.0204	45.8447	47.9807	48.7686	48.0947	51.0513	51.4745	50.9946
	ENSMUSG00000061607.16	Mdc1	-0.169321	5.911	19.3107	0.000216891	0.0218842	55.4345	56.3476	58.9139	59.5714	57.4414	51.1251	61.7288	65.6681	65.1591	63.0398	64.7662	60.6318
	ENSMUSG00000022414.9	Tab1	-0.1717	4.7077	22.0689	0.000102334	0.0147119	23.5946	25.4128	24.441	24.1747	24.0334	26.9706	29.7233	27.0194	27.2648	27.5947	27.5386	28.2783
	ENSMUSG00000025737.6	Wdr24	-0.175392	4.57973	22.4231	9.32613e-05	0.0143156	21.4127	22.2615	21.6679	21.463	23.2459	22.8817	24.664	25.3122	25.7872	23.2675	24.8366	26.2683
	ENSMUSG00000046711.17	Hmga1	-0.181933	5.24406	14.984	0.000791122	0.0454681	38.3856	39.3768	36.7294	36.7237	37.5744	37.8835	39.8144	42.4839	44.3053	41.6166	42.0857	46.8369
	ENSMUSG00000070034.14	Sp110	-0.182363	5.75039	18.719	0.000256593	0.0245974	47.3414	51.0568	51.519	51.3497	49.7182	49.7711	60.7389	58.072	58.7957	55.544	57.206	50.8845
	ENSMUSG00000019864.15	Rtn4ip1	-0.184041	3.45049	15.6029	0.00065102	0.0414711	10.1228	10.6393	9.95038	9.17371	9.70483	9.53179	11.2184	11.654	10.558	11.1845	11.5722	10.9864
	ENSMUSG00000021182.17	Ccdc88c	-0.185037	6.49893	14.5809	0.000899973	0.0483087	80.2215	89.4217	86.5085	85.5347	88.7661	75.6315	95.6315	95.0629	96.5231	104.16	92.4685	91.4434
	ENSMUSG00000063849.7	Ppcdc	-0.192163	4.90693	15.1037	0.000761657	0.0450278	29.2014	31.5997	30.5852	28.4731	29.0891	25.8875	37.1748	33.4774	32.0552	33.3643	32.5332	31.142
	ENSMUSG00000095325.4	Zfp870	-0.194048	3.69353	15.0899	0.000764996	0.0450729	11.3406	12.2004	11.7447	12.4335	11.7627	10.9128	13.4731	11.555	14.2282	13.3362	13.7829	14.1529
	ENSMUSG00000070729.6	Gm12966	-0.195782	5.7481	20.3356	0.000163076	0.0190244	48.5591	49.5824	51.0025	52.3017	47.4063	51.0438	59.8866	51.5398	52.6468	58.1924	59.6897	61.568
	ENSMUSG00000040943.13	Tet2	-0.196547	5.01823	24.4588	5.55079e-05	0.0104758	31.0281	29.5181	31.9173	31.8772	29.8258	27.8372	35.305	33.3042	35.6778	34.2864	36.6817	33.3172
	ENSMUSG00000028653.17	Trit1	-0.198015	3.46274	15.5062	0.000670992	0.0418265	10.2751	10.3212	10.3854	10.7892	10.6702	9.64011	11.8783	13.0891	11.1299	11.0899	12.5821	11.4545
	ENSMUSG00000104156.3	Gm38102	-0.216348	4.94127	20.7424	0.000145922	0.017993	28.6687	26.1645	30.3677	27.2326	28.0221	24.9668	32.3904	31.7206	33.9857	32.5839	32.0146	29.4899
	ENSMUSG00000064120.15	Mocs1	-0.21951	5.51586	20.1166	0.000173215	0.0196795	42.9776	39.6081	43.1999	42.176	40.6485	46.0613	49.0256	46.8634	51.3122	46.0148	50.492	52.867
	ENSMUSG00000074671.7	Tspyl3	-0.219709	3.38155	15.1081	0.000760596	0.0450278	9.33635	10.1767	9.16196	8.01978	9.67942	9.17977	10.6685	10.1447	10.844	11.2554	11.5176	10.2705
	ENSMUSG00000090086.9	AI480526	-0.22006	5.91899	26.2785	3.56044e-05	0.00741717	52.9736	48.8307	56.2495	58.3598	49.4641	49.1212	63.626	57.8246	62.4183	60.0367	62.2825	60.7145
	ENSMUSG00000046808.19	Atp10d	-0.221695	4.58186	15.3388	0.000707185	0.0429313	23.3916	22.7241	21.532	22.04	22.7886	19.0907	26.6163	25.9555	28.5041	24.4498	24.6182	23.267
	ENSMUSG00000044452.11	Zfp507	-0.22464	4.81838	17.7845	0.000336428	0.0290007	25.6749	24.8635	25.3381	26.6268	26.0658	26.8082	29.0909	27.8607	29.3383	30.8578	33.8706	30.5637
	ENSMUSG00000098912.9	1500004A13Rik	-0.227052	4.22947	21.8955	0.000107123	0.0149963	17.8101	15.7854	17.4539	17.0204	16.9453	16.7077	20.5396	18.9037	18.9471	19.626	21.5341	19.5498
	ENSMUSG00000034586.15	Hid1	-0.231337	5.55187	16.2332	0.000535727	0.0374197	44.0432	45.2457	44.9126	39.0604	45.6533	40.3747	51.8027	47.3088	49.1195	49.4671	49.7551	57.0248
	ENSMUSG00000059479.8	B3gnt8	-0.233954	3.75078	23.9637	6.28333e-05	0.0112196	13.6747	13.5304	13.2944	11.9431	13.0583	13.4582	14.5729	16.1325	14.2521	15.4407	16.3212	16.163
	ENSMUSG00000045817.9	Zfp36l2	-0.239713	7.31766	20.6407	0.000150017	0.0182302	153.263	157.045	152.246	163.857	162.975	136.803	163.987	171.766	188.661	184.319	188.267	196.599
	ENSMUSG00000110945.2	Gm9856	-0.244163	3.47772	14.8294	0.000831059	0.0467417	10.4019	8.84677	8.94447	8.94292	8.38375	8.71943	10.2561	11.3818	10.1051	10.4987	10.4805	11.5371
	ENSMUSG00000034858.17	Atosa	-0.245579	5.28872	17.5044	0.000365368	0.0300168	37.7767	37.4976	36.6207	40.0701	35.2626	33.8758	46.221	38.9704	38.1564	43.3191	48.1994	47.3325
	ENSMUSG00000042759.13	Apobr	-0.252001	4.88067	18.0978	0.000306989	0.0274081	27.9583	32.0334	29.5249	27.7808	25.1258	27.8101	34.2602	36.1002	31.8407	34.2155	32.5059	33.7578
	ENSMUSG00000075389.5	Reno1	-0.254065	4.6883	19.8418	0.000186921	0.0201863	24.5333	20.4979	23.8972	24.1459	20.8832	24.1815	29.0084	29.3206	27.4078	27.0508	25.4643	26.4886
	ENSMUSG00000056708.6	Ier5	-0.254855	6.23742	24.9829	4.87537e-05	0.00953257	72.1537	66.1195	70.2779	73.6782	69.5343	73.736	78.9689	82.0975	96.8568	77.3928	84.0896	88.3044
	ENSMUSG00000097354.9	2310001H17Rik	-0.255461	3.41616	16.4883	0.000495581	0.035688	10.0467	9.91648	8.59104	8.33711	8.71402	8.63819	10.751	10.8127	9.34248	11.6337	11.736	10.4908
	ENSMUSG00000019564.13	Arid3a	-0.263565	3.94985	16.5726	0.000483039	0.0349285	12.8628	14.947	14.5721	12.8951	11.9913	13.2416	16.8001	16.1325	16.397	14.8732	15.6389	16.7963
	ENSMUSG00000121490.1	ENSMUSG00000121490.1	-0.265853	3.49637	14.5173	0.000918593	0.0488585	11.3152	10.8127	9.76007	10.8469	10.1875	8.12369	12.4008	11.6045	12.6791	12.1067	12.9642	11.6473
	ENSMUSG00000021676.11	Iqgap2	-0.269492	4.34772	18.518	0.000271831	0.0254372	19.1294	20.7003	19.1395	19.9341	20.4767	15.6787	23.4817	26.1287	22.9034	21.7069	22.9534	21.5048
	ENSMUSG00000120162.1	ENSMUSG00000120162.1	-0.270031	3.70173	17.981	0.000317624	0.0277708	13.421	10.8705	11.5816	10.7892	11.9659	10.967	13.8306	12.9159	13.7039	15.3698	13.2917	14.8413
	ENSMUSG00000039081.11	Zfp503	-0.270387	6.0646	15.5994	0.000651726	0.0414711	71.3672	58.6893	66.6349	54.4076	51.9793	60.2778	77.6766	67.4249	75.3119	69.9207	77.2664	70.7372
	ENSMUSG00000054520.16	Sh3bp2	-0.275091	4.58201	26.8885	3.07996e-05	0.00676314	21.5649	25.008	21.5048	22.9343	22.2042	22.1506	27.7986	27.0937	26.8835	26.7671	26.5833	28.6638
	ENSMUSG00000029570.6	Lfng	-0.277249	5.68137	26.3984	3.4599e-05	0.0073835	53.8362	47.6453	49.5616	48.9553	45.5263	47.8485	61.1239	56.1421	67.6377	58.7126	56.9877	54.9046
	ENSMUSG00000069892.10	9930111J21Rik2	-0.27851	5.50228	16.8389	0.000445666	0.0334345	40.7197	37.6132	38.7956	42.4356	36.7869	37.2065	46.9909	48.1748	57.8185	47.3626	44.7332	38.0808
	ENSMUSG00000041515.11	Irf8	-0.279342	6.07504	21.7644	0.000110905	0.0154026	63.8829	64.4426	63.9978	65.9757	61.9635	68.9972	75.4769	66.7073	85.8698	76.1632	79.8865	88.332
	ENSMUSG00000016756.18	Cmah	-0.283879	4.46287	20.9958	0.000136238	0.0172756	17.8355	21.7122	18.7045	20.7995	18.0886	18.7386	25.049	23.3822	21.7356	24.7099	23.4447	22.7163
	ENSMUSG00000043017.10	Ptgir	-0.289558	3.78655	14.6215	0.000888299	0.0481249	13.624	13.4147	14.2731	12.6932	11.6102	10.6691	15.5353	14.2768	15.4914	15.6772	16.1847	16.0804
	ENSMUSG00000022528.9	Hes1	-0.291162	6.06047	17.7258	0.000342279	0.0292	61.1683	64.6739	61.9044	70.6491	72.0748	60.3048	67.9154	75.1942	90.7317	75.4775	77.1299	91.6912
	ENSMUSG00000020644.10	Id2	-0.298032	6.19808	29.6826	1.62274e-05	0.00430248	74.843	66.6688	61.551	67.9951	60.4138	71.7051	81.911	77.619	85.4408	83.4225	79.9957	87.3132
	ENSMUSG00000055692.22	Tmem191	-0.301527	2.41585	14.9376	0.000802883	0.0454681	5.0741	4.53903	5.60049	4.38492	5.38592	5.00961	6.29661	6.35897	6.86387	5.1075	6.35926	6.00261
	ENSMUSG00000047810.10	Ccdc88b	-0.309241	4.44166	23.9918	6.23904e-05	0.0112196	20.8038	20.2088	20.227	18.4051	19.054	20.58	25.5164	22.9616	24.0712	23.9059	24.8639	26.5161
	ENSMUSG00000115902.2	D730005E14Rik	-0.312673	2.18515	15.4506	0.00068279	0.0418265	3.9578	4.53903	3.99646	3.8945	4.19188	4.30556	5.77419	5.44348	4.8619	4.96562	5.0219	4.84614
	ENSMUSG00000097944.3	A130014A01Rik	-0.340891	3.18503	16.8142	0.000449004	0.0334345	7.99171	7.37231	8.26479	8.33711	6.73241	7.82582	8.5238	9.1302	9.86681	9.88395	10.6715	10.8488
	ENSMUSG00000025993.11	Slc40a1	-0.342411	3.89029	16.9141	0.00043569	0.0330149	12.7867	13.0678	13.0225	12.2028	11.7373	11.2107	12.3733	14.8953	16.0634	14.9914	19.5145	16.0253
	ENSMUSG00000038393.15	Txnip	-0.344153	10.4322	22.3886	9.41059e-05	0.0143196	1327.26	1246.87	1208.07	1322.31	1266.71	1162.8	1401.23	1468.18	1609.74	1480.94	1784.41	1819.29
	ENSMUSG00000025450.5	Gm9752	-0.350403	2.4871	16.1378	0.000551632	0.0381542	5.45466	4.77032	4.73051	4.7311	5.15728	4.90129	7.17649	5.1713	6.69704	6.66812	5.84069	6.3881
	ENSMUSG00000035759.5	Bbs10	-0.351642	2.48606	19.1355	0.000227894	0.0225306	4.99799	4.82814	4.89363	5.10612	3.93782	4.06184	5.80168	4.97336	6.45871	5.72229	7.06888	5.47945
	ENSMUSG00000049999.5	Ppp1r3d	-0.36071	2.62462	16.2671	0.000530194	0.0374197	6.03818	6.47607	4.81207	4.99073	4.59836	5.06377	7.8364	7.22498	5.81522	6.38437	6.9597	6.85619
	ENSMUSG00000079227.11	Ccr5	-0.365622	3.13091	19.791	0.000189581	0.0201863	8.90505	8.29746	7.50356	7.50052	7.95186	6.8239	10.2011	9.823	9.43782	9.74208	9.98922	11.3719
	ENSMUSG00000052336.8	Cx3cr1	-0.36755	4.97581	21.4792	0.00011965	0.0160988	28.1866	31.0793	29.3618	27.3192	25.2275	24.5877	36.4599	30.8546	38.2279	32.6076	37.8007	37.9156
	ENSMUSG00000056468.5	5730596B20Rik	-0.369163	2.33151	21.148	0.00013076	0.0169749	4.94725	4.33665	4.43145	3.72141	4.2935	3.38487	5.11428	5.31976	5.48156	5.62771	5.4313	5.47945
	ENSMUSG00000031389.18	Arhgap4	-0.37202	5.05774	18.5353	0.000270485	0.0254372	27.6285	36.4568	30.5852	28.4154	26.3199	32.7114	46.3035	39.7621	35.7255	40.0087	38.7287	35.107
	ENSMUSG00000039942.16	Ptger4	-0.375253	2.92398	18.8005	0.000250677	0.0242353	8.01708	7.05429	6.93264	7.81785	6.45295	6.22816	10.3935	9.3034	9.31865	8.2051	9.90734	8.01266
	ENSMUSG00000056445.9	Hoxaas2	-0.376606	2.56968	19.1052	0.000229862	0.0225975	4.89651	5.0016	5.05675	5.27921	4.42052	4.98253	5.52672	6.40846	6.48254	7.40114	6.30467	6.33303
	ENSMUSG00000027954.10	Efna1	-0.38023	6.57284	34.5045	5.81695e-06	0.0020413	93.4142	79.9389	85.7744	87.6984	77.2067	108.695	112.734	99.4424	124.694	116.503	114.821	125.201
	ENSMUSG00000037001.11	Zfp39	-0.387906	3.82288	31.3447	1.12717e-05	0.00334311	13.1673	11.9402	11.7447	12.4624	10.1621	11.1024	15.4803	14.9943	17.3503	15.5826	14.9838	13.9327
	ENSMUSG00000051224.14	Tceanc	-0.389199	2.4837	19.819	0.000188109	0.0201863	5.70836	4.68358	4.92082	4.75994	3.96323	4.33263	7.23148	5.54245	6.29188	5.74593	6.30467	6.05768
	ENSMUSG00000087424.3	5730405O15Rik	-0.390439	1.02882	14.4037	0.000952917	0.0495396	1.90279	1.61902	1.68558	1.38471	1.72756	1.43519	2.30967	2.05368	2.00196	2.24635	2.23802	1.95498
	ENSMUSG00000048387.9	Osr1	-0.391073	3.47453	21.6643	0.000113892	0.0156929	9.97061	9.94539	10.0863	8.79868	10.34	8.09661	13.1706	13.0396	11.2014	13.62	11.4903	12.5559
	ENSMUSG00000026177.12	Slc11a1	-0.404329	3.85957	18.481	0.000274743	0.025573	12.5077	14.1375	13.8109	13.2413	13.1599	11.7252	17.0751	15.5634	18.828	15.8427	19.4326	17.2644
	ENSMUSG00000039910.11	Cited2	-0.404873	5.91648	14.6883	0.000869446	0.0478002	57.2359	51.2014	47.8488	58.5617	56.2473	55.4577	53.1225	68.9837	66.7082	70.4882	87.7742	85.3582
	ENSMUSG00000025804.6	Ccr1	-0.41864	3.01077	14.9422	0.000801729	0.0454681	7.76337	8.21073	7.39482	7.93324	7.24051	6.14692	9.62364	10.1199	10.415	9.00906	9.38878	11.1792
	ENSMUSG00000074862.12	BC025920	-0.423886	1.52911	15.7695	0.000618122	0.0402586	3.04446	2.48635	1.8487	2.10591	2.15945	2.1934	3.07957	2.94443	3.5511	2.64833	3.24786	3.11144
	ENSMUSG00000037465.11	Klf10	-0.42663	5.54856	18.1784	0.000299873	0.0270488	53.4557	47.6453	42.0852	44.8012	38.362	30.7617	53.9474	62.8969	62.5136	51.8553	50.3009	64.0462
	ENSMUSG00000021880.8	Rnase6	-0.429455	4.01101	15.1871	0.000741812	0.0443037	14.8164	17.7803	14.3003	13.8471	13.2108	15.6787	24.1691	17.9387	19.1616	17.8053	21.2339	20.4309
	ENSMUSG00000039783.16	Kmo	-0.43059	3.02327	14.6766	0.000872729	0.0478002	6.79929	9.07806	7.31326	7.90439	5.81781	7.50087	10.971	10.5406	8.46067	9.69479	10.5624	9.60968
	ENSMUSG00000024014.9	Pim1	-0.431269	5.47554	24.3039	5.76941e-05	0.0106273	37.3454	36.6592	34.9623	42.9549	40.7755	31.5741	44.1863	42.9045	58.9625	45.9911	53.9855	56.3915
	ENSMUSG00000070000.14	Fcho1	-0.433156	3.10755	22.6398	8.81449e-05	0.0137719	7.86486	8.99132	7.28607	7.41397	7.41835	7.50087	12.0433	10.0209	9.84297	11.3736	9.55254	9.91256
	ENSMUSG00000074063.11	Osgin1	-0.435297	4.7541	15.9822	0.000578725	0.0391008	27.1464	23.8805	22.4835	24.1459	21.6453	22.2318	26.2313	25.1885	39.2051	26.4597	34.3618	39.9807
	ENSMUSG00000040552.9	C3ar1	-0.435745	2.76174	16.6969	0.000465193	0.034094	6.95152	6.50498	5.11112	5.91387	6.37673	5.2804	6.43409	10.3921	7.81718	7.87406	8.02413	8.34307
	ENSMUSG00000023274.15	Cd4	-0.443744	3.10848	18.2014	0.00029788	0.0270488	7.71263	7.80597	8.56385	7.58706	6.27511	8.47572	10.3385	9.50134	10.7963	10.6879	12.3091	9.49954
	ENSMUSG00000100017.3	2410022M11Rik	-0.452121	2.20417	21.4521	0.000120518	0.0160988	4.74428	4.10536	3.67022	3.20214	3.65836	4.95545	6.07664	5.29502	5.02873	5.24937	5.89528	5.78233
	ENSMUSG00000021624.10	Cd180	-0.464629	4.10443	28.2055	2.26656e-05	0.00543321	14.2836	17.8959	15.4965	17.28	13.8967	13.9186	21.6944	20.611	21.7594	21.494	21.9981	20.4034
	ENSMUSG00000000244.18	Tspan32	-0.466199	3.21217	22.2916	9.65221e-05	0.0144362	7.96634	9.51172	7.39482	8.65444	6.96105	10.1546	12.6207	11.7777	9.77148	12.154	12.1454	11.4821
	ENSMUSG00000050930.6	Map10	-0.471256	2.55856	40.1231	1.96053e-06	0.000902826	5.02336	4.4523	5.11112	4.12528	4.44593	4.44095	6.35161	6.40846	5.71989	5.65135	7.72391	6.44317
	ENSMUSG00000060188.7	Cxcl17	-0.473326	4.72929	15.5426	0.000663395	0.0417581	21.5142	30.0964	23.6254	26.1076	26.5485	16.3828	27.9911	31.0278	31.3641	31.0943	39.4656	39.3474
	ENSMUSG00000046470.6	Sox18	-0.47574	6.83189	33.0164	7.90468e-06	0.00256155	123.148	85.0851	94.8548	92.6025	98.0391	106.502	134.126	125.373	155.295	137.311	129.314	153.397
	ENSMUSG00000043993.8	2900052L18Rik	-0.476465	3.90727	44.7249	8.64938e-07	0.000538711	14.0045	10.6682	13.0497	12.3182	12.0929	11.7252	15.8653	14.2025	17.3503	18.893	17.6313	18.8614
	ENSMUSG00000087535.3	Zmiz1os1	-0.49172	0.636491	17.561	0.000359308	0.0299406	1.26853	1.09862	1.22341	1.32701	1.21945	1.57058	2.19969	1.80624	1.54914	2.05719	1.58299	1.65209
	ENSMUSG00000108255.2	ENSMUSG00000108255.2	-0.496176	1.25377	16.2168	0.00053843	0.0374197	2.25797	1.59011	1.57684	1.81743	1.54972	2.08508	2.44716	2.49905	2.24029	2.10448	3.43891	2.64335
	ENSMUSG00000000861.16	Bcl11a	-0.507356	2.67193	19.2399	0.000221266	0.0220782	5.02336	6.73626	5.51893	6.92355	4.69998	6.11985	9.07372	8.06624	7.38819	9.26916	8.5427	7.40689
	ENSMUSG00000103160.2	C130012C08Rik	-0.50798	1.81012	31.7916	1.02403e-05	0.00314378	2.38483	2.94892	2.85462	2.3944	2.76918	2.38295	4.20691	3.41455	3.28894	4.20896	3.65726	3.60707
	ENSMUSG00000114709.2	Gm47920	-0.517823	0.677867	16.7893	0.000452388	0.0335438	1.44612	1.18535	1.19622	1.26932	1.19405	1.57058	2.39216	1.85573	1.93046	1.56062	1.69216	1.84484
	ENSMUSG00000009292.19	Trpm2	-0.53866	2.67646	14.7589	0.000849998	0.0472194	6.16503	6.67844	6.25297	5.88502	4.24269	3.89937	9.62364	8.66008	8.6275	6.71541	7.06888	7.40689
	ENSMUSG00000005718.9	Tfap4	-0.541929	2.75214	33.8414	6.66176e-06	0.00228577	6.08892	5.92676	5.49174	6.02926	4.92863	5.57827	8.68878	7.37344	9.10416	7.87406	8.95209	7.5721
	ENSMUSG00000015966.18	Il17rb	-0.554488	0.920634	15.2095	0.000736592	0.0442942	1.42075	1.38773	1.76714	1.6155	1.34648	1.6789	2.41966	1.83099	2.07346	2.29364	2.81117	2.12019
	ENSMUSG00000097636.10	Mirt1	-0.556369	2.90978	19.4623	0.000207835	0.0211578	6.08892	7.11211	6.76952	6.46198	5.86863	5.82198	10.0361	9.32814	8.03168	9.24552	10.7807	8.64596
	ENSMUSG00000087120.3	Gm12279	-0.558794	0.725467	17.9804	0.000317674	0.0277708	1.26853	1.24317	1.38653	1.24047	1.37189	0.839448	2.1447	1.75676	1.6683	1.82073	1.91051	1.54195
	ENSMUSG00000000673.10	Haao	-0.561544	2.97	14.4576	0.000936468	0.0493592	6.368	8.1529	6.08985	7.12549	5.97025	7.17593	13.1431	9.74877	7.24519	10.9244	9.19773	10.0778
	ENSMUSG00000117872.2	A530088E08Rik	-0.563781	-0.40012	14.9534	0.000798858	0.0454681	0.659633	0.664953	0.734044	0.490418	0.43189	0.487421	0.879876	0.989723	0.810317	0.993124	0.818789	0.633303
	ENSMUSG00000000386.19	Mx1	-0.595381	2.66059	22.2153	9.84721e-05	0.0144804	4.66817	4.79923	4.15958	4.81764	4.95403	5.68658	7.1215	7.8683	7.72185	5.9351	8.62458	6.69098
	ENSMUSG00000078137.2	Ankrd63	-0.598683	5.34202	46.9034	5.98913e-07	0.000403091	37.5991	27.0896	34.636	27.6654	28.2253	36.0692	47.8708	38.7477	51.7173	50.2947	48.7179	52.454
	ENSMUSG00000008193.14	Spib	-0.602988	4.29121	15.5716	0.00065742	0.0415314	13.8269	21.4231	15.7955	19.386	14.7859	17.9534	32.4179	25.6338	22.1169	28.9661	25.3552	22.1105
	ENSMUSG00000050600.6	Zfp831	-0.614477	2.53785	16.9407	0.00043223	0.0330149	4.69354	5.69547	5.81798	4.38492	4.2935	4.95545	9.37618	7.64561	5.79139	8.25239	8.37894	6.25042
	ENSMUSG00000021453.3	Gadd45g	-0.615179	3.86855	23.8087	6.53395e-05	0.0112375	15.1462	9.91648	8.53666	10.0968	12.1945	11.8335	18.4774	15.6624	15.7774	15.9609	20.6335	17.3745
	ENSMUSG00000095105.3	Edaradd	-0.646474	1.43781	20.0937	0.000174314	0.0196795	2.43557	2.3707	2.28369	1.93283	2.00702	1.59766	3.49201	3.43929	2.90761	3.0976	3.73914	3.11144
	ENSMUSG00000103662.2	Gm34294	-0.664018	0.522032	16.057	0.000565521	0.038506	1.26853	0.954063	0.951539	1.18277	1.04162	0.649895	1.34731	1.63304	1.21548	1.84437	2.01968	1.54195
	ENSMUSG00000020926.17	Adam11	-0.685723	2.39757	19.032	0.000234684	0.0229426	4.13539	4.71249	4.89363	3.8368	4.7762	3.89937	5.80168	5.02285	7.14986	5.58041	9.08856	9.63721
	ENSMUSG00000099338.3	2810030D12Rik	-0.711397	2.54587	30.4893	1.35767e-05	0.00380185	4.33836	4.16319	4.48583	4.50031	3.93782	3.24948	5.74669	5.02285	8.67516	6.62083	7.45098	6.88372
	ENSMUSG00000043740.16	B430306N03Rik	-0.719531	1.84711	14.3976	0.0009548	0.0495396	2.74001	3.9319	3.80616	2.36555	2.43891	1.70597	5.52672	4.18158	5.0764	3.90156	5.0219	4.26791
	ENSMUSG00000026764.16	Kif5c	-0.725114	-0.177977	17.3864	0.000378368	0.0307956	0.710374	0.722775	0.652484	0.7789	0.685943	0.460342	0.962364	0.989723	0.83415	1.01677	1.50111	1.34921
	ENSMUSG00000092021.10	Gbp11	-0.745337	0.0774938	15.6966	0.000632277	0.0409786	0.659633	0.751686	0.734044	0.894292	0.86378	0.433263	1.09985	0.915494	1.64447	1.25323	1.20089	1.15647
	ENSMUSG00000120013.1	ENSMUSG00000120013.1	-0.759406	1.05954	28.4817	2.12763e-05	0.00521402	1.69982	1.82139	1.4409	1.5578	1.4227	1.24563	3.02457	2.27636	1.97813	2.81385	3.1114	2.368
	ENSMUSG00000120024.1	ENSMUSG00000120024.1	-0.898977	-0.437746	14.4151	0.000949402	0.0495396	0.50741	0.549309	0.380616	0.894292	0.558917	0.541579	0.604915	0.841265	1.09631	1.04042	1.58299	1.23907
	ENSMUSG00000098055.3	Gm26947	-0.97502	-0.494366	16.9332	0.000433197	0.0330149	0.279076	0.57822	0.59811	0.490418	0.584322	0.5145	0.687403	0.717549	1.00098	0.803958	1.33735	1.45935
	ENSMUSG00000116504.3	I730030J21Rik	-0.979799	0.165293	20.4998	0.000155902	0.0187658	0.811856	0.462576	0.869978	1.29817	0.711349	0.541579	2.44716	1.73202	1.07248	1.56062	1.36465	1.1014
	ENSMUSG00000103168.2	Gm30948	-1.12242	0.11116	15.7656	0.000618867	0.0402586	0.964079	0.722775	0.815605	0.576963	0.660538	0.27079	1.56728	1.85573	1.14398	1.67885	1.74675	0.770977
	ENSMUSG00000026360.10	Rgs2	-1.20895	6.70934	94.2216	1.54447e-09	6.75666e-06	84.2301	76.9033	67.4777	76.7938	74.3359	70.3241	119.746	132.524	160.205	171.55	231.553	224.988
	ENSMUSG00000026227.12	2810459M11Rik	-1.25174	0.131815	16.8909	0.000438742	0.0330929	0.48204	0.549309	0.543737	0.836596	0.86378	0.649895	0.797388	1.01447	2.38329	1.22958	2.29261	1.65209
	ENSMUSG00000031725.9	Ces1f	-1.74424	3.28854	14.3802	0.000960181	0.049564	5.42929	5.37745	5.00238	5.27921	6.32592	4.60342	5.41674	5.71565	30.8159	5.74593	34.1708	25.5524
	ENSMUSG00000076555.4	Igkv4-57-1	-2.62052	-0.276497	16.075	0.000562402	0.0384432	0.152223	0.318021	0.353429	0.288481	0.177837	0.324948	1.09985	2.57328	0.214496	4.68187	1.11901	0.220279
	ENSMUSG00000032315.7	Cyp1a1	-5.28618	4.3833	16.0755	0.000562315	0.0384432	1.37001	1.06971	1.49528	1.32701	1.82918	1.94969	1.07235	0.915494	102.434	0.73302	111.983	137.812

## Sheet: d IPA Canonical 2dpi
	Ingenuity Canonical Pathways	-log(p-value)	Ratio	z-score	Molecules
Microplastic vs. PBS at 2 days post delivery. IPA Canonical Pathways.	Role of JAK family kinases in IL-6-type Cytokine Signaling	2.48	0.0633	2.236	BCL2L1,CEBPD,HSP90AA1,HSP90AB1,MCL1
	Superpathway of Inositol Phosphate Compounds	1.99	0.0342	2.236	DUSP16,DUSP8,IPMK,PI4K2B,PPP1R10,PPP1R16B,PPP1R3D,PPP2CB
	Ephrin Receptor Signaling	1.83	0.0347	2.236	ATF4,CRKL,EFNA1,EPHA2,GNB1,ITGA5,PAK1
	MSP-RON Signaling in Cancer Cells Pathway	1.48	0.0357	2.236	ATF4,ETS2,RPS6KA2,YWHAH,YWHAZ
	Chronic Myeloid Leukemia Signaling	3.04	0.0396	2.111	BCL2L1,CCND2,CRKL,HES1,HSP90AA1,HSP90AB1,IRF8,KLF4,MCL1,TRIB2,ULK1
	3-phosphoinositide Biosynthesis	2.31	0.0388	2	DUSP16,DUSP8,IPMK,PI4K2B,PPP1R10,PPP1R16B,PPP1R3D,PPP2CB
	D-myo-inositol (1,4,5,6)-Tetrakisphosphate Biosynthesis	2.08	0.0389	2	DUSP16,DUSP8,IPMK,PPP1R10,PPP1R16B,PPP1R3D,PPP2CB
	D-myo-inositol (3,4,5,6)-tetrakisphosphate Biosynthesis	2.08	0.0389	2	DUSP16,DUSP8,IPMK,PPP1R10,PPP1R16B,PPP1R3D,PPP2CB
	ERK5 Signaling	1.84	0.0541	2	ATF4,RPS6KA2,YWHAH,YWHAZ
	PI3K/AKT Signaling	2.97	0.045	1.89	BCL2L1,HSP90AA1,HSP90AB1,IL17RB,ITGA5,MCL1,PPP2CB,YWHAH,YWHAZ
	Human Embryonic Stem Cell Pluripotency	1.84	0.0348	1.89	BDNF,HSP90AA1,HSP90AB1,ID2,KLF2,KLF4,S1PR2
	ERK/MAPK Signaling	3.99	0.0512	1.667	ATF4,CRKL,ETS2,ITGA5,PAK1,PPP1R10,PPP1R3D,PPP2CB,SRF,YWHAH,YWHAZ
	Integrin Signaling	2.23	0.0377	1.633	ACTG1,Arf2,CRKL,ITGA5,MYL12B,NEDD9,PAK1,TSPAN2
	Epithelial Adherens Junction Signaling	1.8	0.038	1.633	FRMD6,MYL12B,PAK1,PPP2CB,YWHAH,YWHAZ
	CDK5 Signaling	1.8	0.0435	1.342	BDNF,MAPK6,PPP1R10,PPP1R3D,PPP2CB
	PEDF Signaling	1.65	0.0476	1	BCL2L1,BDNF,GDNF,SRF
	Dopamine-DARPP32 Feedback in cAMP Signaling	1.5	0.0323	1	ATF4,CREM,KCNJ2,PPP1R10,PPP1R3D,PPP2CB
	MicroRNA Biogenesis Signaling Pathway	1.49	0.0321	0.816	DNAJB1,HSP90AA1,HSP90AB1,NUP107,NUP54,POLR2A
	Protein Kinase A Signaling	2.18	0.0292	0.577	ATF4,CREM,DUSP16,DUSP3,DUSP8,GNB1,MYL12B,PDE4B,PPP1R10,PPP1R3D,YWHAH,YWHAZ
	Telomerase Signaling	1.91	0.0463	0.447	ETS2,HSP90AA1,HSP90AB1,PPP2CB,TEP1
	Gαs Signaling	1.65	0.0397	0.447	ATF4,GNB1,PTGER4,PTGIR,RGS2
	IL-10 Signaling	1.33	0.0325	0.447	ATF4,BCL2L1,CCR1,CCR5,TAB1
	cAMP-mediated signaling	1.5	0.0297	0.378	ATF4,CREM,PDE4B,PTGER4,PTGIR,RGS2,S1PR1
	Growth Hormone Signaling	1.9	0.0563	0	RPS6KA2,SOCS5,SOCS7,SRF
	Phagosome Formation	1.78	0.023	0	BCL10,C3AR1,CCR1,CCR5,CELSR1,CRKL,CX3CR1,ITGA5,LCAT,MAPK6,MYL12B,PAK1,PTGER4,PTGIR,S1PR1,S1PR2
	G-Protein Coupled Receptor Signaling	1.74	0.0228	0	ATF4,C3AR1,CCR1,CCR5,CELSR1,CX3CR1,GNB1,MYL12B,PAK1,PDE4B,PTGER4,PTGIR,RGS2,S1PR1,S1PR2,SRF
	HIPPO signaling	3.95	0.0814	-0.447	FRMD6,PPP1R10,PPP1R3D,PPP2CB,RASSF1,YWHAH,YWHAZ
	Breast Cancer Regulation by Stathmin1	2.78	0.0286	-1	ATF4,C3AR1,CCND2,CCR1,CCR5,CELSR1,CX3CR1,GNB1,PAK1,PPP1R10,PPP1R3D,PPP2CB,PTGER4,PTGIR,S1PR1,S1PR2,TSG101
	PPAR Signaling	1.32	0.0374	-1	CITED2,HSP90AA1,HSP90AB1,TAB1
	Th2 Pathway	1.51	0.0365	-1.342	CCR1,CCR5,CD4,IL17RB,S1PR1

## Sheet: e IPA D&F 2dpi
	Categories	Diseases or Functions Annotation	p-value	Predicted Activation State	Activation z-score	Molecules	# Molecules
Microplastic vs. PBS at 2 days post delivery. IPA Diseases or Functions	Cellular Assembly and Organization,Cellular Function and Maintenance	Microtubule dynamics	4.73e-05	Increased	3.422	ACTG1,ADAMTS1,AREG,ARHGAP4,BBS10,BCL11A,BCL6B,BDNF,BTBD3,CCR5,CELSR1,CRKL,CX3CR1,CYTH2,DNAJA1,DYNLL1,EFNA1,ENTR1,EPHA2,GDNF,GEM,HES1,HSP90AA1,HSP90AB1,ID2,ITGA5,KCNJ2,KIF5C,KLF2,KLF5,MAP10,MAPK6,NDEL1,NEDD9,Nes,PAK1,PI4K2B,PPP2CB,RAB3A,RABGEF1,RASSF1,RGS2,S1PR1,S1PR2,SRF,TMOD2,TNFRSF12A,TRIM32,TRPM2,TSPAN2,ULK1,YWHAH	52
	Cell Death and Survival	Cell survival	1.58e-09	Increased	3.329	ADAMTS1,AREG,ATF4,BCL10,BCL2L1,BCL6B,BDNF,CCDC117,CCND2,CCNL1,CCR1,CD4,CEBPD,CHKA,CRKL,CX3CR1,CXCL17,DNAJA1,DUSP8,EFNA1,EPHA2,ERRFI1,ETS2,GDNF,HES1,HLX,HMGA1,HSP90AB1,ID2,IRF8,ITGA5,JMJD6,KLF2,KLF4,KLF5,KLF6,LIG4,LNX2,LRRC8A,MCAM,MCL1,MDC1,MICAL2,NEDD9,Nes,NR4A2,NR4A3,NUP54,PAK1,PIM1,PPCDC,PPP1R16B,PPP1R3D,RABGEF1,RASSF1,RCAN1,RPS6KA2,S1PR1,S1PR2,SESN2,SLC11A1,SLC40A1,SOCS7,SPIB,SRF,TAB1,TET2,TNF…	74
	Cell Morphology,Cellular Assembly and Organization,Cellular Function and Maintenance	Extension of cellular protrusions	4.6e-06	Increased	3.268	ARHGAP4,BCL11A,BDNF,CCR5,CRKL,CYTH2,EPHA2,GEM,HSP90AA1,HSP90AB1,NDEL1,PAK1,S1PR1,SRF,TNFRSF12A,ULK1	16
	Cellular Assembly and Organization,Cellular Function and Maintenance	Organization of cytoskeleton	0.000109	Increased	3.148	ACTG1,ADAMTS1,AREG,ARHGAP4,BBS10,BCL11A,BCL6B,BDNF,BTBD3,CCR5,CELSR1,CRKL,CX3CR1,CYTH2,DNAJA1,DYNLL1,EFNA1,ENTR1,EPHA2,GDNF,GEM,HES1,HSP90AA1,HSP90AB1,ID2,IQGAP2,ITGA5,KCNJ2,KIF5C,KLF2,KLF5,MAP10,MAPK6,MICAL2,NDEL1,NEDD9,Nes,PAK1,PI4K2B,PPP2CB,RAB3A,RABGEF1,RASSF1,RGS2,S1PR1,S1PR2,SRF,SYDE1,TMOD2,TNFRSF12A,TRIM32,TRPM2,TSPAN2,TSPAN32,ULK1,YWHAH	56
	Cellular Assembly and Organization,Cellular Function and Maintenance	Organization of cytoplasm	0.000192	Increased	3.148	ACTG1,ADAMTS1,AREG,ARHGAP4,BBS10,BCL11A,BCL6B,BDNF,BTBD3,CCR5,CELSR1,CRKL,CX3CR1,CYTH2,DNAJA1,DYNLL1,EFNA1,ENTR1,EPHA2,EXOC8,GDNF,GEM,HES1,HSP90AA1,HSP90AB1,ID2,IQGAP2,ITGA5,KCNJ2,KIF5C,KLF2,KLF5,MAP10,MAPK6,MICAL2,NDEL1,NEDD9,Nes,PAK1,PI4K2B,PLEKHF1,PPP2CB,RAB3A,RABGEF1,RASSF1,RGS2,S1PR1,S1PR2,SESN2,SRF,SYDE1,TMOD2,TNFRSF12A,TRIM32,TRPM2,TSPAN2,TSPAN32,ULK1,YWHAH	59
	Cell Morphology,Cellular Assembly and Organization,Cellular Function and Maintenance,Nervous System Development and Function	Extension of neurites	1.76e-06	Increased	3.118	ARHGAP4,BCL11A,BDNF,CCR5,CYTH2,EPHA2,GEM,HSP90AA1,HSP90AB1,NDEL1,PAK1,S1PR1,SRF,TNFRSF12A,ULK1	15
	Organismal Development	Size of body	0.000137	Increased	2.825	ACTG1,ADAMTS1,AREG,ARID3A,ATF4,BBS10,BDNF,CADPS2,COL12A1,CRKL,DNAJA1,HES1,ID2,KLF6,LFNG,LIG4,LRRC8A,MEX3C,Mocs1,Nes,PER1,PIM1,POLR2A,RAB3A,RCAN1,SLC25A25,SOCS7,SPRY2,SPRY4,TSC22D3,TSPAN2,UBL4A,ZFP36L2	33
	Cellular Growth and Proliferation,Tissue Development	Proliferation of neural cells	0.000488	Increased	2.82	AREG,BDNF,CCR1,CCR5,CELSR1,CX3CR1,CXCL16,EFNA1,EPHA2,GDNF,HES1,ID2,KLF4,LNX2,MAFK,NDEL1,Nes,PAK1,RABGEF1,S1PR1,S1PR2,SPRY2,SRF,TMOD2,TNFRSF12A,ULK1,YWHAZ,ZNF503	28
	Cellular Development,Nervous System Development and Function,Tissue Development	Differentiation of neurons	0.0011	Increased	2.801	AREG,BCL2L1,BDNF,CCR5,CHKA,EFNA1,EPHA2,GDNF,HES1,ID2,KLF6,LNX2,Nes,NR4A2,S1PR1,S1PR2,TRIM32,ULK1	18
	Cellular Movement	Migration of carcinoma cell lines	1.51e-06	Increased	2.751	AREG,ARL4C,BDNF,CRKL,DNAJA1,EPHA2,FOXF1,HSP90AB1,ITGA5,KLF4,KLF6,MAPK6,MCL1,MEX3A,MICAL2,NEDD9,Nes,NR4A2,PAK1,RASSF1,SOCS5,TAB1,TFAP4,TGFB1I1,TNFAIP6,TRIB2	26
	Cell Death and Survival	Cell viability	9.9e-08	Increased	2.744	ADAMTS1,AREG,ATF4,BCL10,BCL2L1,BCL6B,BDNF,CCDC117,CCND2,CCNL1,CCR1,CD4,CEBPD,CHKA,CRKL,CX3CR1,DNAJA1,DUSP8,EFNA1,EPHA2,ERRFI1,ETS2,GDNF,HES1,HMGA1,HSP90AB1,ID2,IRF8,JMJD6,KLF2,KLF4,KLF5,KLF6,LIG4,LNX2,LRRC8A,MCAM,MCL1,MDC1,MICAL2,Nes,NR4A2,NR4A3,NUP54,PAK1,PIM1,PPCDC,PPP1R16B,PPP1R3D,RABGEF1,RASSF1,RCAN1,RPS6KA2,S1PR1,S1PR2,SESN2,SLC40A1,SOCS7,SPIB,SRF,TAB1,TET2,TNFRSF10A,TRIB2,TSC22D3,TXNIP,YWHAZ	67
	Embryonic Development,Hair and Skin Development and Function,Organ Development,Organismal Development,Tissue Development	Formation of skin	0.000812	Increased	2.63	BCL6B,CCND2,CELSR1,EDARADD,EPHA2,ERRFI1,ETS2,FOSL2,KLF4,KLF5,LRRC8A,MAFK,SOX18,SRF,TRIM16,TSG101,TXNIP	17
	Cellular Development	Differentiation of stem cells	1.55e-05	Increased	2.54	BCL2L1,BDNF,GADD45G,GDNF,HES1,ID2,IRF8,KLF4,L3MBTL2,NR4A2,OSR1,PIM1,S1PR1,S1PR2,SPIB,SRF,STK40,TSC22D3,ZFP36L2,ZNF831	20
	Cell Death and Survival	Cell viability of tumor cell lines	5.16e-06	Increased	2.503	ADAMTS1,AREG,BCL2L1,BCL6B,BDNF,CCDC117,CCND2,CCNL1,CEBPD,CHKA,CRKL,DNAJA1,EPHA2,ERRFI1,HES1,HMGA1,HSP90AB1,ID2,IRF8,KLF4,KLF5,KLF6,LIG4,LNX2,LRRC8A,MCAM,MCL1,MICAL2,Nes,PAK1,PIM1,PPP1R16B,PPP1R3D,RASSF1,RCAN1,RPS6KA2,S1PR2,SESN2,SLC40A1,SOCS7,SPIB,SRF,TAB1,TET2,TRIB2,TXNIP	46
	Cellular Movement	Invasion of carcinoma cell lines	9.52e-05	Increased	2.451	AREG,BCL10,BDNF,CCR1,EPHA2,FOXF1,HSP90AB1,ITGA5,KLF4,MAPK6,MCL1,MEX3A,MICAL2,NEDD9,Nes,NR4A2,PAK1,SOCS5,TAB1,TFAP4,TGFB1I1,TNFAIP6	22
	Cell Morphology,Cellular Assembly and Organization,Cellular Function and Maintenance,Nervous System Development and Function	Extension of axons	1.04e-05	Increased	2.449	ARHGAP4,BDNF,CCR5,HSP90AA1,HSP90AB1,NDEL1,PAK1,SRF,TNFRSF12A,ULK1	10
	Cellular Development,Embryonic Development,Hair and Skin Development and Function,Organ Development,Organismal Development,Tissue Development	Differentiation of dermal cells	0.0028	Increased	2.449	EPHA2,ERRFI1,KLF4,KLF5,MAFK,SRF,TRIM16,TSG101,TXNIP	9
	Cellular Growth and Proliferation	Outgrowth of cells	0.00298	Increased	2.412	BDNF,CEBPD,CELSR1,EFNA1,EPHA2,GDNF,HSP90AA1,MAFK,NDEL1,PAK1,Pvr,RABGEF1,SPRY2,SRF,TNFRSF12A,ULK1,YWHAZ	17
	Cell Morphology	Shape change of tumor cell lines	0.000516	Increased	2.408	BCL10,CYTH2,EPHA2,GEM,HES1,ITGA5,MYADM,NEDD9,PAK1,SPRY2	10
	Cell Morphology,Cellular Assembly and Organization,Cellular Function and Maintenance	Formation of lamellipodia	0.000978	Increased	2.4	BDNF,CRKL,DNAJA1,EPHA2,GDNF,HSP90AA1,PAK1,RASSF1,S1PR1,TNFRSF12A	10
	Cellular Development,Embryonic Development,Organismal Development,Tissue Development	Differentiation of embryonic tissue	3.1e-06	Increased	2.376	BCL2L1,BDNF,CITED2,ETS2,FOSL2,FOXF1,GADD45G,GDNF,HES1,ID2,ITGA5,NR4A2,OSR1,S1PR1,S1PR2,SRF,STK40,TET2,TSC22D3	19
	Cellular Development,Embryonic Development,Organismal Development,Tissue Development	Differentiation of neural stem cells	4.03e-06	Increased	2.204	BCL2L1,BDNF,GADD45G,GDNF,HES1,NR4A2,S1PR1,S1PR2	8
	Cellular Development,Nervous System Development and Function,Tissue Development	Differentiation of dopaminergic neurons	0.000285	Increased	2.195	BCL2L1,BDNF,GDNF,ID2,NR4A2	5
	Antigen Presentation,Inflammatory Response	Antigen presentation	0.00166	Increased	2.177	CLEC9A,HSP90AA1,HSP90AB1,PI4K2B,SEC22B,SLC11A1	6
	Cell Morphology,Cellular Assembly and Organization,Cellular Function and Maintenance	Formation of cellular protrusions	0.000165	Increased	2.174	ADAMTS1,AREG,BBS10,BCL11A,BDNF,BTBD3,CELSR1,CRKL,CX3CR1,CYTH2,DNAJA1,DYNLL1,EFNA1,ENTR1,EPHA2,GDNF,GEM,HES1,HSP90AA1,HSP90AB1,ITGA5,KCNJ2,KLF5,MAPK6,NDEL1,NEDD9,Nes,PAK1,PI4K2B,RAB3A,RABGEF1,RASSF1,RGS2,S1PR1,S1PR2,SRF,TMOD2,TNFRSF12A,TRIM32,TRPM2,TSPAN2,ULK1,YWHAH	43
	Cell Morphology,Cellular Movement	Cell spreading	4.47e-05	Increased	2.122	BCL10,CCR5,CRKL,CYTH2,EFNA1,EPHA2,GEM,ITGA5,MYADM,NEDD9,PAK1,SPRY2,SRF,TGFB1I1,TSPAN32,YWHAZ	16
	Hematological System Development and Function,Hematopoiesis,Lymphoid Tissue Structure and Development,Organ Morphology,Tissue Morphology	Quantity of thymocytes	0.000728	Increased	2.025	BCL10,BCL11A,BCL2L1,BDNF,CD4,ETS2,KLF13,KLF4,LIG4,LRRC8A,MCL1,PIM1	12
	Cellular Development,Cellular Growth and Proliferation,Organ Development,Skeletal and Muscular System Development and Function,Tissue Development	Proliferation of muscle cells	2.02e-06	Increased	2	BDNF,C3AR1,CCND2,CD180,CEBPD,CITED2,CXCL16,EPC1,EPHA2,ID2,ITGA5,KLF10,KLF4,KLF5,NR4A2,NR4A3,PAK1,PTGIR,S1PR1,S1PR2,SRF,TNFRSF10A,TNFRSF12A,TRIM32	24
	Cellular Movement	Migration of neural cells	0.00105		1.995	BDNF,CADPS2,CRKL,EFNA1,ERRFI1,GDNF,HSP90AA1,KLF4,NDEL1,Nes,NR4A2,SOCS7,SRF,ULK1	14
	Cellular Development,Tissue Development	Differentiation of central nervous system cells	0.000308		1.992	BCL2L1,BDNF,GDNF,HES1,ID2,NR4A2,S1PR1,S1PR2,ULK1	9
	Cancer,Hematological Disease,Organismal Injury and Abnormalities	Mature lymphocytic neoplasm	6.25e-05		1.982	APOBR,ARHGAP4,ARID3A,BCL10,BCL11A,BCL2L1,BDNF,CCDC88B,CCND2,CD180,CD4,CEBPD,CELSR1,CHSY1,CITED2,CLK1,CLK4,COL12A1,CREM,DUSP16,DUSP8,ENPEP,EPC1,EPHA2,FILIP1L,FOXF1,GNB1,HSP90AA1,HSP90AB1,ID2,IQGAP2,IRF8,ITGA5,KLF2,KLF6,KMO,L3MBTL2,LIG4,LRRC8A,MCAM,MCC,MCL1,MICAL2,NR4A2,NR4A3,PDCD11,PER1,PIM1,PTGER4,RABGEF1,RASGEF1B,RESF1,RNF123,S1PR1,S1PR2,SEC14L1,SERTAD1,SIAH2,SNRK,SNX18,SP110,SPIB,TEP1,TET2,TFAP…	71
	Cardiovascular System Development and Function,Embryonic Development,Organ Development,Organismal Development,Tissue Development	Cardiogenesis	0.000123		1.982	ACTG1,BDNF,CCND2,CITED2,CRKL,DUSP8,EFNA1,FILIP1L,FOXF1,HES1,ID2,JMJD6,KCTD10,KLF10,KLF4,OSR1,PIM1,RASSF1,RGS2,RPS6KA2,S1PR1,S1PR2,SOX18,SRF,TAB1	25
	Cellular Development,Tissue Development	Differentiation of brain cells	0.00015		1.98	BCL2L1,BDNF,GDNF,HES1,ID2,NR4A2,ULK1	7
	Cellular Development,Tissue Development	Differentiation of epithelial cells	0.00263		1.977	EPHA2,ERRFI1,HES1,ID2,KLF2,KLF4,KLF5,MAFK,MAPK6,OSR1,SRF,TGFB1I1,TRIM16,TSG101,TXNIP	15
	Cellular Movement	Migration of central nervous system cells	0.00165		1.969	BDNF,CADPS2,GDNF,KLF4,NDEL1,Nes,SOCS7	7
	Cell Morphology,Renal and Urological System Development and Function	Shape change of kidney cell lines	0.00173		1.961	EFNA1,GDNF,GEM,PAK1,S1PR2	5
	Cellular Movement	Cell movement	1.19e-10		1.958	ACRBP,ACTG1,ADAMTS1,AREG,ARHGAP4,ARID3A,ARL4C,BCL10,BCL2L1,BDNF,C3AR1,CADPS2,CCR1,CCR5,CD4,CEBPD,CELSR1,CITED2,CNN3,CRKL,CX3CR1,CXCL16,CXCL17,CYP1A1,CYTH2,DNAJA1,DSTN,DUSP3,EFNA1,EGFL7,EPHA2,ERRFI1,FOSL2,FOXF1,FRMD6,GDNF,GEM,GNB1,HES1,HLX,HMGA1,HSP90AA1,HSP90AB1,ID2,IL17RB,IPMK,IRF8,IRX2,ITGA5,KIF5C,KLF2,KLF4,KLF5,KLF6,LCAT,MAPK6,MCAM,MCL1,MEX3A,MICAL2,MYADM,NDEL1,NEDD9,Nes,NR4A2,ORAI2,OSR1,PAK1,…	105
	Carbohydrate Metabolism	Uptake of monosaccharide	0.00285		1.836	ARHGAP4,ATF4,CEBPD,HMGA1,KLF4,LRRC8A,NR4A3,PAK1,SPRY2,SRF,TET2,TRIM32,TXNIP,ULK1	14
	Cardiovascular System Development and Function	Response of heart	6.74e-05		1.793	DUSP8,KLF5,RASSF1,RCAN1,RPS6KA2,SRF,TRPM2,TXNIP	8
	Hematological System Development and Function,Immune Cell Trafficking,Inflammatory Response,Tissue Development	Accumulation of mononuclear leukocytes	8.26e-05		1.728	BCL10,CCR1,CCR5,CX3CR1,ETS2,KLF2,S1PR1,S1PR2,SH3BP2,TNFRSF25,TSC22D3	11
	Cellular Growth and Proliferation,Tissue Development	Proliferation of central nervous system cells	0.00189		1.698	CCR1,CCR5,CXCL16,GDNF,HES1,ID2,KLF4,LNX2,Nes,ZNF503	10
	Cellular Movement	Migration of cells	3.43e-09		1.68	ACTG1,ADAMTS1,AREG,ARHGAP4,ARID3A,ARL4C,BCL10,BCL2L1,BDNF,C3AR1,CADPS2,CCR1,CCR5,CD4,CEBPD,CITED2,CNN3,CRKL,CX3CR1,CXCL16,CXCL17,CYP1A1,CYTH2,DNAJA1,DUSP3,EFNA1,EGFL7,EPHA2,ERRFI1,FOSL2,FOXF1,FRMD6,GDNF,HES1,HLX,HMGA1,HSP90AA1,HSP90AB1,ID2,IL17RB,IPMK,IRX2,ITGA5,KLF2,KLF4,KLF5,KLF6,LCAT,MAPK6,MCAM,MCL1,MEX3A,MICAL2,MYADM,NDEL1,NEDD9,Nes,NR4A2,ORAI2,PAK1,PDE4B,PER1,PIM1,PTGER4,PTGIR,Pvr,RABGEF1,RA…	94
	Cellular Movement,Connective Tissue Development and Function	Migration of fibroblast cell lines	0.000174		1.673	BDNF,CNN3,CRKL,FOXF1,IPMK,ITGA5,KLF2,NEDD9,Pvr,RASSF1	10
	Cellular Movement,Connective Tissue Development and Function	Cell movement of fibroblast cell lines	4.74e-07		1.652	BDNF,CNN3,CRKL,EFNA1,EPHA2,FOSL2,FOXF1,IPMK,ITGA5,KLF2,NEDD9,PAK1,Pvr,RASSF1,TGFB1I1,TRIM32	16
	Cellular Movement,Embryonic Development	Migration of embryonic cells	0.00203		1.633	BDNF,CCR1,GDNF,ITGA5,S1PR1,S1PR2,SRF	7
	Connective Tissue Development and Function,Tissue Morphology	Quantity of connective tissue	0.00107		1.62	ADAMTS1,BBS10,BCL6B,C3AR1,CCND2,CEBPD,CYTH2,FOSL2,ID2,IRF8,KLF10,KLF13,KLF2,KLF4,MAFK,MCL1,PER1,PIM1,S1PR1,SLC25A25,SLC40A1,TSC22D3,ZFP36L2	23
	Organismal Development,Tissue Development	Development of epithelial tissue	4.25e-06		1.619	ADAMTS1,BDNF,EFNA1,EGFL7,EPHA2,ERRFI1,FOSL2,FOXF1,GDNF,ID2,KCNJ2,KLF2,KLF4,KLF5,MCAM,NR4A2,NRARP,PAK1,PIM1,PPP1R16B,PTGIR,RCAN1,SLC40A1,SPIB,SPRY2,SPRY4,TGFB1I1,TNFRSF12A,TNFRSF25	29
	Gene Expression	Transcription of DNA	2.66e-11		1.616	ARID3A,ARID5A,ATF4,BCL10,BCL11A,BCL6B,CD4,CEBPD,CEBPG,CITED2,CREM,CSRNP1,CSRNP2,DNAJB1,DNAJB5,EFNA1,EPC1,ETS2,FOSL2,FOXF1,GBP6,GDNF,HES1,HMGA1,ID2,IER5,IRF8,IRX1,IRX2,JMJD6,KLF10,KLF13,KLF2,KLF4,KLF5,KLF6,MAFK,MEPCE,MICAL2,MMS19,MTF1,NR4A2,NR4A3,NRARP,OSR1,PER1,PIM1,POLR2A,RIOX1,S1PR1,SERTAD1,SLC11A1,SLC40A1,SNIP1,SOX18,SPIB,SPTY2D1,SRF,TET2,TFAP4,TGFB1I1,TRIM16,TSG101,TXNIP,YWHAH,YWHAZ,Zfp568,ZN…	69
	Cellular Movement	Cell movement of prostate cancer cell lines	0.00043		1.61	BDNF,EPHA2,HSP90AA1,KLF4,KLF5,KLF6,Nes,NR4A2,PAK1,PTGER4,ZNF507	11
	Cellular Development,Tissue Development	Differentiation of epithelial tissue	0.00184		1.601	EPHA2,ERRFI1,HES1,ID2,KLF2,KLF4,KLF5,MAFK,MAPK6,OSR1,PIM1,SOX18,SRF,TGFB1I1,TRIM16,TSG101,TXNIP	17
	Cancer,Organismal Injury and Abnormalities	Angiogenesis of tumor	0.00276		1.6	ADAMTS1,BDNF,EPHA2,IRX1,KLF5,KLF6,PAK1,S1PR1	8
	Cellular Development,Cellular Growth and Proliferation	Colony formation of tumor cell lines	2.94e-06		1.593	BCL2L1,BCL6B,CRKL,EPHA2,ERRFI1,FRMD6,GADD45G,GDNF,HES1,HMGA1,HPGD,KLF2,KLF4,KLF6,MCAM,PAK1,RASSF1,RCAN1,SERTAD1,SLC40A1,SPRY2,SPRY4,TET2,TRIT1	24
	Hematological System Development and Function,Inflammatory Response,Tissue Morphology	Quantity of neutrophils	0.00134		1.591	BCL6B,C3AR1,CCR1,CCR5,CEBPG,CYP1A1,EPHA2,FOSL2,KLF5,MCL1,PDE4B,PTGIR,ZFP36L2	13
	Cellular Development,Tissue Development	Differentiation of bone marrow cells	0.000854		1.562	C3AR1,GDNF,HES1,HMGA1,IRF8,KLF4,LFNG,MAFK,MCL1,TET2,TSC22D3	11
	Cellular Development,Cellular Growth and Proliferation,Hematological System Development and Function,Hematopoiesis,Lymphoid Tissue Structure and Development,Tissue Development	Hematopoiesis of mononuclear leukocytes	2.58e-08		1.55	AREG,ARID3A,BCL10,BCL11A,BCL2L1,BDNF,C3AR1,CCND2,CD4,DNAJB1,ETS2,GADD45G,HLX,HMGA1,HSP90AA1,ID2,IPMK,IRF8,JMJD6,KLF10,KLF2,KLF4,LFNG,LIG4,LRRC8A,MCL1,NR4A2,NRARP,PIM1,PTGER4,S1PR1,SOCS5,SPIB,SPRY2,SRF,TFAP4,TNFRSF25,ULK1,ZFP36L2	39
	Gene Expression	Activation of DNA endogenous promoter	2.25e-11		1.54	ARID3A,ARID5A,ATF4,BCL11A,BCL6B,CEBPD,CEBPG,CITED2,CREM,CSRNP1,CSRNP2,DNAJB1,DNAJB5,EFNA1,EPC1,ETS2,FOSL2,FOXF1,GBP6,GDNF,HES1,HMGA1,ID2,IER5,IRF8,IRX1,IRX2,JMJD6,KLF10,KLF13,KLF2,KLF4,KLF5,KLF6,MAFK,MEPCE,MICAL2,MTF1,NR4A2,NR4A3,NRARP,OSR1,PER1,POLR2A,S1PR1,SERTAD1,SLC11A1,SLC40A1,SNIP1,SOX18,SPIB,SRF,TET2,TFAP4,TSG101,TXNIP,YWHAZ,Zfp568,ZNF131,ZNF217	60
	Gene Expression	Expression of RNA	3.83e-14		1.537	ACTG1,ARID3A,ARID5A,ATF4,BCL10,BCL11A,BCL2L1,BCL6B,BDNF,CCR1,CCR5,CD4,CDR2,CEBPD,CEBPG,CITED2,CREM,CRKL,CSRNP1,CSRNP2,DNAJB1,DNAJB5,EFNA1,EPC1,ETS2,FOSL2,FOXF1,GBP6,GDNF,GEM,GNB1,HES1,HMGA1,ID2,IER5,IRF8,IRX1,IRX2,JMJD6,KLF10,KLF13,KLF2,KLF4,KLF5,KLF6,L3MBTL2,MAFK,MEPCE,MICAL2,MMS19,MTF1,Mx1,MYADM,NR4A2,NR4A3,NRARP,OSR1,PAK1,PER1,PIM1,POLR2A,PPP2CB,PTGER4,PTGIR,RCAN1,RGS2,RIOX1,RPS6KA2,S1PR1,SERT…	98
	Cellular Movement,Hematological System Development and Function,Immune Cell Trafficking	Cell movement of lymphocytes	0.00064		1.529	CCR1,CCR5,CD4,CRKL,CX3CR1,CXCL16,CXCL17,HSP90AA1,HSP90AB1,IL17RB,IPMK,IRX2,ITGA5,KLF2,MCAM,MYADM,NEDD9,S1PR1,S1PR2,TNFRSF10A	20
	Lymphoid Tissue Structure and Development,Organ Morphology,Tissue Morphology	Quantity of lymphoid organ	8.27e-05		1.527	BCL10,BCL11A,BCL2L1,BDNF,CD4,ETS2,ID2,IRF8,KLF13,KLF4,LIG4,LRRC8A,MCL1,PIM1,TET2,ZFP36L2	16
	Cellular Development,Cellular Growth and Proliferation	Cell proliferation of tumor cell lines	2.9e-09		1.518	ABTB1,ACRBP,ADAMTS1,AMOTL2,AREG,ARID3A,ARL4C,ATF4,BCL2L1,BDNF,C3AR1,CCDC88C,CCND2,CEBPD,CHKA,CREM,CRKL,CYP1A1,DNAJA1,DYNLL1,EFNA1,EPHA2,ERRFI1,ETS2,EXOC8,FOSL2,FOXF1,FRMD6,GADD45G,GDNF,HES1,HMGA1,HPGD,HSP90AA1,ID2,IL17RB,IQGAP2,IRF8,IRX1,ITGA5,KLF10,KLF2,KLF4,KLF5,KLF6,MAPK6,MCL1,MEX3A,MICAL2,NEDD9,NR4A2,NR4A3,OSGIN1,PAK1,PI4K2B,PIM1,PLEKHF2,PPP1R10,Pvr,RASSF1,RGS2,RIOX1,S1PR2,SAR1A,SEC22B,SERTAD…	90
	Cellular Development,Cellular Growth and Proliferation,Embryonic Development,Hematological System Development and Function,Hematopoiesis,Lymphoid Tissue Structure and Development,Organ Development,Organismal Development,Tissue Development	Lymphopoiesis	1.63e-08		1.506	AREG,ARID3A,BCL10,BCL11A,BCL2L1,BDNF,C3AR1,CCND2,CD4,DNAJB1,ETS2,GADD45G,HLX,HMGA1,HSP90AA1,ID2,IPMK,IRF8,JMJD6,KLF10,KLF2,KLF4,LFNG,LIG4,LRRC8A,MCL1,NR4A2,NRARP,PIM1,PTGER4,S1PR1,SOCS5,SPIB,SPRY2,SRF,TFAP4,TNFRSF25,ZFP36L2	38
	Cellular Movement	Migration of cancer cells	0.000539		1.498	BDNF,CX3CR1,GDNF,ITGA5,KLF4,MCAM,NEDD9,PAK1,SIAH2,SPRY2,SRF	11
	Hematological System Development and Function,Immune Cell Trafficking,Inflammatory Response,Tissue Development	Accumulation of T lymphocytes	0.00229		1.492	BCL10,CCR1,CCR5,KLF2,S1PR1,S1PR2,TNFRSF25	7
	Cancer,Organismal Injury and Abnormalities	Incidence of tumor	9.12e-06		1.471	ABTB1,ACTG1,ADAM11,ADAMTS1,AMOTL2,APOBR,AREG,ARHGAP4,ARID3A,ARL4C,ATF4,ATOSA,B3GNT8,B4GALT3,BBS10,BCL10,BCL11A,BCL2L1,BCL6B,BDNF,BTBD3,C14orf119,C1orf116,C3AR1,CADPS2,CCDC117,CCDC88B,CCDC88C,CCND2,CCR1,CD180,CD4,CDR2,CEBPD,CEBPG,CELSR1,CHKA,CHSY1,CLDND1,CLEC1A,CLK1,COL12A1,CREM,CRKL,CSRNP2,CTTNBP2NL,CWC22,CX3CR1,CYP1A1,DENND4B,DNAJA1,DNAJB5,DND1,DSTN,DUSP16,DUSP3,EDARADD,EFNA1,EGFL7,ENPEP,EPC1,EP…	220
	Gene Expression	Transcription	5.79e-15		1.466	ACTG1,ARID3A,ARID5A,ATF4,BCL10,BCL11A,BCL2L1,BCL6B,BDNF,CCR1,CCR5,CD4,CDR2,CEBPD,CEBPG,CITED2,CREM,CRKL,CSRNP1,CSRNP2,DNAJB1,DNAJB5,EFNA1,EPC1,ETS2,FOSL2,FOXF1,GBP6,GDNF,GEM,GNB1,HES1,HMGA1,ID2,IER5,IRF8,IRX1,IRX2,JMJD6,KLF10,KLF13,KLF2,KLF4,KLF5,KLF6,L3MBTL2,MAFK,MEPCE,MICAL2,MMS19,MTF1,Mx1,MYADM,NR4A2,NR4A3,NRARP,OSR1,PAK1,PER1,PIM1,POLR2A,PPP2CB,PTGER4,PTGIR,RCAN1,RIOX1,RPS6KA2,S1PR1,SERTAD1,S…	96
	Tissue Morphology	Quantity of stem cells	0.00228		1.463	ARID3A,BCL11A,CCND2,GDNF,IRF8,KLF2,KLF4,KLF5,TET2	9
	Cellular Development,Cellular Growth and Proliferation,Nervous System Development and Function,Organismal Development,Tissue Development	Development of neurons	0.00162		1.458	ADAMTS1,AREG,BCL11A,BCL2L1,BDNF,BTBD3,CADPS2,CELSR1,CRKL,CX3CR1,CYTH2,EFNA1,EGFL7,GDNF,GEM,HES1,HSP90AA1,HSP90AB1,ID2,KCNJ2,MAPK6,NDEL1,NR4A2,PAK1,RAB3A,RABGEF1,RGS2,S1PR2,SRF,TMOD2,TRIM32,TSPAN2,ULK1,YWHAH,YWHAZ	35
	Tissue Morphology	Quantity of progenitor cells	1.14e-07		1.432	ARID3A,ATF4,BBS10,BCL10,BCL11A,BCL2L1,BDNF,CCND2,CD180,CD4,ETS2,FOSL2,ID2,IRF8,KLF13,KLF2,KLF4,KLF5,LCAT,LIG4,LRRC8A,MCL1,PIM1,RCAN1,SH3BP2,SLC40A1,TET2,TSC22D3,ULK1	29
	Cardiovascular Disease,Organismal Injury and Abnormalities	Abnormality of heart ventricle	2.17e-05		1.432	ADAMTS1,CCND2,CHSY1,CITED2,COL12A1,CREM,CRKL,DUSP8,EFNA1,HSP90AA1,HSP90AB1,JMJD6,LCAT,MYL12B,PDE4B,PIM1,PTGER4,PTGIR,RASSF1,RCAN1,RNF123,RPS6KA2,SEC22B,SRF,TAB1,TMOD2,TXNIP,YWHAZ	28
	Cellular Movement	Cell movement of tumor cell lines	2.3e-06		1.431	AREG,ARID3A,ARL4C,BCL10,BCL2L1,BDNF,C3AR1,CCR1,CCR5,CEBPD,CRKL,CX3CR1,CXCL17,CYTH2,DNAJA1,EPHA2,ERRFI1,FOXF1,GDNF,GNB1,HES1,HMGA1,HSP90AA1,HSP90AB1,ID2,ITGA5,KLF2,KLF4,KLF5,KLF6,MAPK6,MCAM,MCL1,MEX3A,MICAL2,MYADM,NEDD9,Nes,NR4A2,ORAI2,PAK1,PTGER4,RASSF1,S1PR1,S1PR2,SIAH2,SOCS5,SOX18,SPRY2,TAB1,TFAP4,TGFB1I1,TNFAIP6,TNFRSF25,TRIB2,TRPM2,ZNF217,ZNF507	58
	Cellular Development,Cellular Growth and Proliferation	Cell proliferation of ovarian cancer cell lines	0.00169		1.425	ACRBP,CYP1A1,KLF2,KLF6,MEX3A,PAK1,SERTAD1,SLC40A1,TNFRSF10A,TSG101	10
	Infectious Diseases,Organismal Injury and Abnormalities	Viral Infection	2.48e-06		1.42	ABTB1,ARID5A,ARL4C,ATF4,BCL11A,BCL2L1,BTBD3,C3AR1,CCR1,CCR5,CD4,CEBPD,CLDND1,CLK1,CSRNP1,CX3CR1,CXCL16,CXCL17,CYP1A1,DNAJA1,DNAJB1,DUSP16,DUSP3,EDARADD,EPHA2,ETS2,FOSL2,GEM,HES1,HID1,HLX,HMGA1,HPGD,HSP90AA1,HSP90AB1,IRF8,ITGA5,KCNJ2,KIF5C,KLF2,KLF6,LIG4,LNX2,MAFK,MCAM,MCL1,Mx1,NR4A2,NUP107,NUP54,PAK1,PDE4B,PIM1,POLR2A,PTGER4,RAB3A,RASSF1,RGS2,SEC14L1,SP110,SPRY2,TFAP4,TNFRSF10A,TSG101,TSPAN2,TXNI…	70
	Cancer	Entrance of tumor cell lines	0.00173		1.414	CCR5,CD4,DUSP3,ORAI2,PAK1	5
	Hematological System Development and Function,Hematopoiesis,Tissue Morphology	Quantity of hematopoietic progenitor cells	5.2e-07		1.412	ARID3A,ATF4,BCL10,BCL11A,BCL2L1,BDNF,CCND2,CD180,CD4,ETS2,FOSL2,IRF8,KLF13,KLF2,KLF4,KLF5,LCAT,LIG4,LRRC8A,MCL1,PIM1,RCAN1,SH3BP2,SLC40A1,TET2,TSC22D3,ULK1	27
	Cellular Movement,Nervous System Development and Function	Migration of neurons	0.000748		1.411	BDNF,CADPS2,CRKL,ERRFI1,GDNF,HSP90AA1,KLF4,NDEL1,NR4A2,SOCS7,SRF,ULK1	12
	Embryonic Development,Endocrine System Development and Function,Organ Development,Organismal Development,Reproductive System Development and Function,Tissue Development	Formation of testis	0.000857		1.411	ACRBP,ATF4,BCL2L1,CITED2,CRKL,DNAJA1,EPC1,GADD45G,GDNF,NR4A3,SPATA2,TSC22D3	12
	Cellular Movement	Cell movement of blood cells	9.33e-08		1.394	AREG,BDNF,C3AR1,CCR1,CCR5,CD4,CITED2,CRKL,CX3CR1,CXCL16,CXCL17,CYP1A1,EGFL7,EPHA2,FOSL2,GDNF,HSP90AA1,HSP90AB1,IL17RB,IPMK,IRX2,ITGA5,KLF2,KLF6,LCAT,MCAM,MYADM,NEDD9,ORAI2,PAK1,PDE4B,PER1,PTGER4,PTGIR,RABGEF1,RCAN1,S1PR1,S1PR2,SPATA2,SPRY2,SRF,TET2,TNFAIP6,TNFRSF10A,TRPM2,TSPAN32,YWHAZ	47
	Cancer,Organismal Injury and Abnormalities	Malignant solid tumor	8.18e-07		1.387	ABTB1,ACRBP,ACTG1,ADAM11,ADAMTS1,AMOTL2,ANKRD63,APOBR,AREG,ARHGAP4,ARID3A,ARID5A,ARL4C,ATF4,ATOSA,B3GNT8,B4GALT3,BBS10,BCL10,BCL11A,BCL2L1,BCL6B,BDNF,BTBD3,C14orf119,C1orf116,C3AR1,CADPS2,CCDC117,CCDC88B,CCDC88C,CCND2,CCNL1,CCR1,CCR5,CD180,CD4,CDR2,CEBPD,CEBPG,CELSR1,CHKA,CHSY1,CITED2,CLDND1,CLEC1A,CLEC9A,CLK1,CLK4,CNN3,COL12A1,CREM,CRKL,CSRNP1,CSRNP2,CTTNBP2NL,CWC22,CX3CR1,CXCL16,CXCL17,CYP1A1,C…	278
	Cellular Development,Cellular Growth and Proliferation	Development of tumor cell lines	2.46e-06		1.387	BCL2L1,BCL6B,CRKL,EPHA2,ERRFI1,FRMD6,GADD45G,GDNF,GEM,HES1,HMGA1,HPGD,KLF2,KLF4,KLF6,MCAM,PAK1,RASSF1,RCAN1,S1PR2,SERTAD1,SLC40A1,SPRY2,SPRY4,TET2,TRIT1,TSPAN13	27
	Embryonic Development,Nervous System Development and Function,Organ Development,Organismal Development	Growth of brain	0.00128		1.387	BDNF,CCR5,GDNF,HES1,ID2,KLF4,LNX2,Nes,ZNF503	9
	Cellular Movement,Embryonic Development	Migration of embryonic cell lines	6.66e-05		1.38	CCR1,CCR5,CNN3,CRKL,EPHA2,FOXF1,HLX,IPMK,KLF2,NEDD9,RASSF1	11
	Cardiovascular System Development and Function,Organismal Development,Tissue Development	Development of endothelial tissue	0.000344		1.377	ADAMTS1,BDNF,EFNA1,EGFL7,EPHA2,FOXF1,KCNJ2,KLF2,MCAM,NR4A2,NRARP,PIM1,PPP1R16B,PTGIR,RCAN1,SLC40A1,SPRY4,TNFRSF12A,TNFRSF25	19
	Cellular Movement	Migration of squamous cell carcinoma cell lines	8.87e-05		1.363	AREG,BDNF,DNAJA1,FOXF1,ITGA5,KLF4,MCL1,MICAL2,NEDD9,TAB1	10
	Connective Tissue Development and Function,Tissue Morphology	Quantity of connective tissue cells	0.00322		1.363	BBS10,C3AR1,CYTH2,FOSL2,IRF8,KLF10,KLF2,KLF4,PER1,S1PR1,SLC40A1,TSC22D3	12
	Embryonic Development	Quantity of embryo	0.00137		1.359	BDNF,CITED2,HES1,IRF8,KLF2,KLF4,KLF5,Nes,NRARP	9
	Embryonic Development,Organ Development,Organismal Development,Skeletal and Muscular System Development and Function,Tissue Development	Formation of muscle	3.88e-05		1.355	ACTG1,AREG,BDNF,EPC1,EPHA2,FILIP1L,FOSL2,FOXF1,HLX,HSP90AA1,ID2,ITGA5,KLF10,KLF2,LRRC8A,PTGER4,PTGIR,RGS2,SPRY2,SRF,TNFRSF12A	21
	Cellular Movement	Migration of tumor cell lines	1.85e-05		1.349	AREG,ARID3A,ARL4C,BCL10,BCL2L1,BDNF,C3AR1,CCR5,CEBPD,CRKL,DNAJA1,EPHA2,ERRFI1,FOXF1,GDNF,HES1,HMGA1,HSP90AA1,HSP90AB1,ID2,ITGA5,KLF2,KLF4,KLF5,KLF6,MAPK6,MCAM,MCL1,MEX3A,MICAL2,MYADM,NEDD9,Nes,NR4A2,PAK1,PTGER4,RASSF1,S1PR2,SIAH2,SOCS5,SOX18,SPRY2,TAB1,TFAP4,TGFB1I1,TNFAIP6,TNFRSF25,TRIB2,TRPM2,ZNF217,ZNF507	51
	Organismal Development	Growth of organism	2.01e-05		1.341	ADAMTS1,AREG,BCL2L1,BDNF,CCR5,CEBPD,CITED2,CX3CR1,ETS2,FOSL2,FOXF1,HES1,HMGA1,HSP90AA1,HSP90AB1,ID2,KCNJ2,KLF2,KLF4,LNX2,LRRC8A,MAFK,MCL1,Mx1,Nes,NR4A3,OSR1,POLR2A,RIOX1,S1PR1,S1PR2,SLC11A1,SLC25A25,STK40,TSG101,ZNF503	36
	Cancer,Organismal Injury and Abnormalities	Development of malignant tumor	4.22e-05		1.328	ABTB1,ACTG1,ADAM11,ADAMTS1,AMOTL2,APOBR,AREG,ARHGAP4,ARID3A,ARL4C,ATF4,ATOSA,B3GNT8,B4GALT3,BBS10,BCL10,BCL11A,BCL2L1,BCL6B,BDNF,BTBD3,C14orf119,C1orf116,C3AR1,CADPS2,CCDC117,CCDC88B,CCDC88C,CCND2,CCR1,CD180,CD4,CDR2,CEBPG,CELSR1,CHKA,CHSY1,CLDND1,CLEC1A,CLK1,COL12A1,CREM,CRKL,CSRNP2,CTTNBP2NL,CWC22,CX3CR1,CYP1A1,DENND4B,DNAJA1,DNAJB5,DND1,DSTN,DUSP16,DUSP3,EDARADD,EGFL7,ENPEP,EPC1,EPHA2,ERRFI1,E…	210
	Cellular Development,Embryonic Development,Organismal Development	Differentiation of embryonic cells	0.000542		1.32	BCL2L1,BDNF,CITED2,FOXF1,GDNF,ID2,ITGA5,NR4A2,OSR1,PIM1,SRF,STK40,TET2,TSC22D3	14
	Cellular Growth and Proliferation	Expansion of cells	0.00104		1.32	AREG,BCL2L1,BDNF,CCND2,CD180,CD4,GDNF,HMGA1,IRF8,KLF2,PIM1,S1PR1,SRF,TNFAIP6,TNFRSF12A	15
	Gene Expression	Transcription of RNA	7.12e-14		1.313	ARID3A,ARID5A,ATF4,BCL10,BCL11A,BCL2L1,BCL6B,BDNF,CCR5,CD4,CDR2,CEBPD,CEBPG,CITED2,CREM,CSRNP1,CSRNP2,DNAJB1,DNAJB5,EFNA1,EPC1,ETS2,FOSL2,FOXF1,GBP6,GDNF,GEM,GNB1,HES1,HMGA1,ID2,IER5,IRF8,IRX1,IRX2,JMJD6,KLF10,KLF13,KLF2,KLF4,KLF5,KLF6,MAFK,MEPCE,MICAL2,MMS19,MTF1,Mx1,NR4A2,NR4A3,NRARP,OSR1,PER1,PIM1,POLR2A,PTGER4,PTGIR,RCAN1,RIOX1,S1PR1,SERTAD1,SLC11A1,SLC40A1,SNIP1,SOX18,SPIB,SPTY2D1,SRF,STK40,…	83
	Tissue Morphology	Quantity of epithelial tissue	0.000487		1.312	ATF4,BCL6B,BDNF,ERRFI1,GDNF,HES1,ID2,IQGAP2,KLF2,KLF4,MCL1,SPRY2	12
	Embryonic Development,Organismal Development	Development of body trunk	4.81e-09		1.3	ACTG1,ADAMTS1,AREG,ATF4,BCL2L1,BDNF,CCND2,CEBPD,CEBPG,CITED2,CRKL,DUSP8,EFNA1,ERRFI1,FILIP1L,FOXF1,GADD45G,GDNF,GEM,HES1,HLX,ID2,JMJD6,KCTD10,KLF10,KLF2,KLF4,KLF5,KLF6,LCAT,LFNG,LRRC8A,MAPK6,NDEL1,NR4A3,NUP107,OSR1,PIM1,PTGER4,RAB3A,RASSF1,RGS2,RPS6KA2,S1PR1,S1PR2,SLC40A1,SOCS5,SOX18,SPIB,SPRY2,SPRY4,SRF,STK40,TAB1,TET2,TGFB1I1,YWHAZ,ZNG1A	58
	Cancer,Organismal Injury and Abnormalities	Formation of solid tumor	2.48e-09		1.299	ABTB1,ACTG1,ADAM11,ADAMTS1,AMOTL2,APOBR,AREG,ARHGAP4,ARID3A,ARID5A,ARL4C,ATF4,ATOSA,B3GNT8,B4GALT3,BBS10,BCL10,BCL11A,BCL2L1,BCL6B,BDNF,BTBD3,C14orf119,C1orf116,C3AR1,CADPS2,CCDC117,CCDC88B,CCDC88C,CCND2,CCNL1,CCR1,CCR5,CD180,CD4,CDR2,CEBPD,CEBPG,CELSR1,CHKA,CHSY1,CLDND1,CLEC1A,CLEC9A,CLK1,CLK4,CNN3,COL12A1,CREM,CRKL,CSRNP1,CSRNP2,CTTNBP2NL,CWC22,CX3CR1,CXCL16,CYP1A1,DENND4B,DNAJA1,DNAJB1,DNAJB5,…	252
	Cancer,Organismal Injury and Abnormalities	Frequency of tumor	1.06e-05		1.298	ABTB1,ACTG1,ADAM11,ADAMTS1,AMOTL2,APOBR,AREG,ARHGAP4,ARID3A,ARL4C,ATF4,ATOSA,B3GNT8,B4GALT3,BBS10,BCL10,BCL11A,BCL2L1,BCL6B,BDNF,BTBD3,C14orf119,C1orf116,C3AR1,CADPS2,CCDC117,CCDC88B,CCDC88C,CCND2,CCR1,CD180,CD4,CDR2,CEBPD,CEBPG,CELSR1,CHKA,CHSY1,CLDND1,CLEC1A,CLK1,COL12A1,CREM,CRKL,CSRNP2,CTTNBP2NL,CWC22,CX3CR1,CYP1A1,DENND4B,DNAJA1,DNAJB5,DND1,DSTN,DUSP16,DUSP3,EDARADD,EGFL7,ENPEP,EPC1,EPHA2,ER…	215
	Cell Cycle	Interaction of DNA	5.91e-07		1.27	BCL10,CD4,CEBPD,CREM,CYP1A1,DNAJB1,EPC1,ETS2,FOSL2,HMGA1,ID2,IPMK,ITGA5,KLF13,KLF5,LIG4,MAFK,MTF1,NR4A2,PAK1,PER1,RASSF1,S1PR1,SLC11A1,SRF,TFAP4,TSC22D3,YWHAZ	28
	Cellular Movement	Cell movement of tumor cells	0.00125		1.246	BDNF,CX3CR1,GDNF,KLF4,MCAM,NEDD9,PAK1,SIAH2,SPRY2,SRF	10
	Nervous System Development and Function,Tissue Morphology	Quantity of central nervous system cells	0.000597		1.239	BDNF,CADPS2,CCND2,GDNF,HES1,Nes,RAB3A,TNFAIP6,TRPM2	9
	Cellular Development	Differentiation of progenitor cells	1.6e-05		1.236	ATF4,BCL2L1,BDNF,CEBPD,CITED2,EPC1,FOXF1,GADD45G,GDNF,HES1,HMGA1,ID2,IRF8,KLF4,LFNG,LIG4,LRRC8A,MAFK,S1PR1,S1PR2,SPIB,SPRY2,SRF,TET2,TNFRSF12A,ZNF831	26
	Embryonic Development,Nervous System Development and Function,Organismal Development	Development of central nervous system	0.00151		1.227	BCL2L1,BDNF,BTBD3,CCND2,CELSR1,CITED2,CREM,CRKL,CX3CR1,DYNLL1,EFNA1,EPHA2,GDNF,HES1,ID2,IPMK,LIG4,NDEL1,NR4A2,NR4A3,PAK1,S1PR1,SPRY2,SPRY4,SRF,TSPAN2,YWHAH	27
	Cellular Growth and Proliferation	Proliferation of vascular cells	0.00025		1.224	CD180,CEBPD,KLF2,KLF4,KLF5,NR4A2,NR4A3,NRARP,PAK1,PTGIR,RCAN1,SPRY4,SRF,TNFRSF10A,TNFRSF12A,TNFRSF25	16
	Cellular Development,Cellular Growth and Proliferation	Colony formation of cells	1.83e-06		1.215	AREG,BCL2L1,BCL6B,CD4,CRKL,EPHA2,ERRFI1,FRMD6,GADD45G,GDNF,HES1,HMGA1,HPGD,IRF8,KLF2,KLF4,KLF6,MCAM,PAK1,RASSF1,RCAN1,SERTAD1,SLC40A1,SPIB,SPRY2,SPRY4,TET2,TGFB1I1,TNFRSF10A,TRIT1,ULK1	31
	Cellular Movement,Immune Cell Trafficking	Leukocyte migration	4.65e-07		1.211	AREG,BDNF,C3AR1,CCR1,CCR5,CD4,CITED2,CRKL,CX3CR1,CXCL16,CXCL17,CYP1A1,EGFL7,EPHA2,FOSL2,GDNF,HSP90AA1,HSP90AB1,IL17RB,IPMK,IRX2,ITGA5,KLF2,KLF6,LCAT,MCAM,MYADM,NEDD9,ORAI2,PAK1,PDE4B,PER1,PTGER4,PTGIR,RABGEF1,RCAN1,S1PR1,S1PR2,SPATA2,SPRY2,SRF,TNFAIP6,TNFRSF10A,TRPM2,YWHAZ	45
	Cell Death and Survival,Nervous System Development and Function,Organismal Injury and Abnormalities	Survival of ganglion cells	0.00061		1.204	BDNF,CX3CR1,GDNF,Nes	4
	Cellular Development,Cellular Function and Maintenance,Cellular Growth and Proliferation	Assembly of cells	0.00088		1.176	ADAMTS1,BDNF,EFNA1,EGFL7,FOXF1,KCNJ2,KLF2,MCAM,NR4A2,NRARP,PIM1,PPP1R16B,PTGIR,RCAN1,SPRY4,SRF,TNFRSF12A,TNFRSF25	18
	Cellular Movement,Hematological System Development and Function,Immune Cell Trafficking	Cell movement of leukocytes	8.54e-05		1.169	AREG,BDNF,C3AR1,CCR1,CCR5,CD4,CRKL,CX3CR1,CXCL16,CXCL17,EGFL7,EPHA2,HSP90AA1,HSP90AB1,IL17RB,IPMK,IRX2,ITGA5,KLF2,KLF6,LCAT,MCAM,MYADM,NEDD9,ORAI2,PDE4B,PTGER4,PTGIR,S1PR1,S1PR2,SPRY2,SRF,TNFAIP6,TNFRSF10A,TRPM2,YWHAZ	36
	Cancer,Organismal Injury and Abnormalities	Generation of tumor	5.29e-08		1.162	ABTB1,ACTG1,ADAM11,ADAMTS1,AMOTL2,APOBR,AREG,ARHGAP4,ARID3A,ARID5A,ARL4C,ATF4,ATOSA,B3GNT8,B4GALT3,BBS10,BCL10,BCL11A,BCL2L1,BCL6B,BDNF,BTBD3,C14orf119,C1orf116,C3AR1,CADPS2,CCDC117,CCDC88B,CCDC88C,CCND2,CCNL1,CCR1,CCR5,CD180,CD4,CDR2,CEBPG,CELSR1,CHKA,CHSY1,CLDND1,CLEC1A,CLEC9A,CLK1,CLK4,CNN3,COL12A1,CREM,CRKL,CSRNP1,CSRNP2,CTTNBP2NL,CWC22,CX3CR1,CXCL16,CYP1A1,DENND4B,DNAJA1,DNAJB1,DNAJB5,DND1,D…	244
	Cellular Development,Cellular Growth and Proliferation,Nervous System Development and Function,Organismal Development,Tissue Development	Development of neural cells	0.000896		1.155	ADAMTS1,AREG,BCL11A,BCL2L1,BDNF,BTBD3,CADPS2,CELSR1,CRKL,CX3CR1,CYTH2,EFNA1,EGFL7,EPHA2,GDNF,GEM,HES1,HSP90AA1,HSP90AB1,ID2,KCNJ2,KLF4,MAPK6,NDEL1,NR4A2,PAK1,RAB3A,RABGEF1,RGS2,S1PR2,SRF,TMOD2,TRIM32,TSPAN2,ULK1,YWHAH,YWHAZ	37
	Skeletal and Muscular System Development and Function	Quantity of bone	0.000962		1.135	AREG,ATF4,C3AR1,CHSY1,CYTH2,IRF8,KLF10,KLF4,LFNG,NRARP,PER1,SLC40A1,TSC22D3	13
	Nervous System Development and Function,Tissue Morphology	Quantity of ganglion cells	0.000105		1.131	BDNF,GDNF,S1PR2,TRPM2	4
	Cellular Movement	Migration of tumor cells	0.000155		1.127	BDNF,CX3CR1,EPHA2,GDNF,HES1,ITGA5,KLF4,MCAM,NEDD9,PAK1,SIAH2,SPRY2,SRF	13
	Cellular Development,Cellular Growth and Proliferation,Hematological System Development and Function,Hematopoiesis,Lymphoid Tissue Structure and Development,Tissue Development	Leukopoiesis	3.25e-09		1.122	AREG,ARID3A,BCL10,BCL11A,BCL2L1,BDNF,C3AR1,CCND2,CD4,CITED2,DNAJB1,ETS2,GADD45G,HES1,HLX,HMGA1,HSP90AA1,ID2,IPMK,IRF8,JMJD6,KLF10,KLF2,KLF4,LFNG,LIG4,LRRC8A,MCL1,NR4A2,NRARP,PIM1,PTGER4,S1PR1,SLC40A1,SOCS5,SPIB,SPRY2,SRF,TET2,TFAP4,TNFRSF25,TRPM2,TSPAN2,ULK1,ZFP36L2,ZNF831	46
	Cell Morphology,Cellular Assembly and Organization,Cellular Development,Cellular Function and Maintenance,Cellular Growth and Proliferation,Nervous System Development and Function,Organismal Development,Tissue Development	Axonogenesis	0.000179		1.121	BDNF,CX3CR1,EFNA1,GDNF,HSP90AA1,HSP90AB1,KCNJ2,NDEL1,RAB3A,RABGEF1,SRF,TRIM32,TSPAN2,ULK1	14
	Cancer,Hematological Disease,Organismal Injury and Abnormalities	Growth of hematological system tumor	0.00229		1.114	BCL2L1,CRKL,GDNF,HES1,MCL1,PAK1,SPIB	7
	Cellular Development,Embryonic Development,Organ Development,Organismal Development,Reproductive System Development and Function	Maturation of oocytes	0.00209		1.109	AREG,BDNF,GDNF,LFNG,RPS6KA2	5
	Cell Morphology,Cellular Development,Cellular Growth and Proliferation,Nervous System Development and Function,Organismal Development,Tissue Development	Morphogenesis of neurons	0.00104		1.102	ADAMTS1,AREG,BCL11A,BDNF,BTBD3,CELSR1,CRKL,CX3CR1,CYTH2,EFNA1,GDNF,GEM,HES1,HSP90AA1,HSP90AB1,ID2,KCNJ2,MAPK6,NDEL1,PAK1,RAB3A,RABGEF1,RGS2,S1PR2,SRF,TMOD2,TRIM32,TSPAN2,ULK1,YWHAH	30
	Cell Morphology,Cellular Assembly and Organization,Cellular Development,Cellular Function and Maintenance,Cellular Growth and Proliferation,Nervous System Development and Function,Organismal Development,Tissue Development	Neuritogenesis	0.00173		1.101	ADAMTS1,AREG,BCL11A,BDNF,BTBD3,CELSR1,CRKL,CX3CR1,CYTH2,EFNA1,GDNF,GEM,HES1,HSP90AA1,HSP90AB1,KCNJ2,MAPK6,NDEL1,PAK1,RAB3A,RABGEF1,RGS2,S1PR2,SRF,TMOD2,TRIM32,TSPAN2,ULK1,YWHAH	29
	Cancer,Hematological Disease,Immunological Disease,Organismal Injury and Abnormalities	Non-Hodgkin lymphoma	2.34e-05		1.091	BCL10,BCL2L1,CCND2,CD180,CD4,CLK1,COL12A1,CREM,DUSP8,ENPEP,EPC1,EPHA2,FILIP1L,FOXF1,GNB1,HSP90AA1,HSP90AB1,ID2,IQGAP2,IRF8,ITGA5,KLF2,KLF6,KMO,L3MBTL2,MCAM,MCL1,MICAL2,NR4A2,NR4A3,PDCD11,PER1,PIM1,RESF1,RNF123,S1PR1,S1PR2,SEC14L1,SERTAD1,SIAH2,SNRK,SNX18,SP110,SPIB,TEP1,TET2,TFAP4,TNFRSF10A,YWHAZ,ZFP36L2,ZNF503,ZNF629	52
	Cardiovascular System Development and Function,Cellular Movement	Migration of endothelial cells	0.000333		1.074	ADAMTS1,BDNF,EFNA1,EGFL7,EPHA2,HLX,HSP90AA1,HSP90AB1,KLF2,MCAM,NR4A2,PIM1,RCAN1,S1PR1,SPRY4,TNFRSF12A,TNFRSF25,YWHAZ	18
	Cell Cycle,Skeletal and Muscular System Development and Function	Cell cycle progression of muscle cells	1.42e-05		1.067	CCND2,KLF4,KLF5,NR4A3,PIM1,TNFRSF12A	6
	Cellular Development,Cellular Growth and Proliferation,Embryonic Development,Organ Development,Organismal Development,Skeletal and Muscular System Development and Function,Tissue Development	Myogenesis of myotube	0.000191		1.067	AREG,EPC1,HSP90AA1,KLF10,SPRY2,TNFRSF12A	6
	Cancer,Hematological Disease,Organismal Injury and Abnormalities	Leukemogenesis	0.000778		1.067	BCL2L1,HES1,MCL1,TET2	4
	Hematological System Development and Function,Immune Cell Trafficking,Inflammatory Response,Tissue Development	Accumulation of lymphocytes	0.000146		1.055	BCL10,CCR1,CCR5,CX3CR1,KLF2,S1PR1,S1PR2,SH3BP2,TNFRSF25,TSC22D3	10
	Cellular Development,Cellular Growth and Proliferation,Connective Tissue Development and Function	Proliferation of fibroblast cell lines	3.71e-05		1.051	AREG,BCL2L1,ERRFI1,GADD45G,GDNF,HMGA1,KLF2,KLF4,KLF5,KLF6,LIG4,PAK1,PIM1,Pvr,RASSF1,S1PR1,S1PR2,SERTAD1,TRIM32,TSC22D3,TXNIP	21
	Cancer,Organismal Injury and Abnormalities	Non-central nervous system malignant neoplasm	6.77e-07		1.044	ABTB1,ACRBP,ACTG1,ADAM11,ADAMTS1,AMOTL2,ANKRD63,APOBR,AREG,ARHGAP4,ARID3A,ARID5A,ARL4C,ATF4,ATOSA,B3GNT8,B4GALT3,BBS10,BCL10,BCL11A,BCL2L1,BCL6B,BDNF,BTBD3,C14orf119,C1orf116,C3AR1,CADPS2,CCDC117,CCDC88B,CCDC88C,CCND2,CCNL1,CCR1,CCR5,CD180,CD4,CDR2,CEBPD,CEBPG,CELSR1,CHKA,CHSY1,CITED2,CLDND1,CLEC1A,CLEC9A,CLK1,CLK4,CNN3,COL12A1,CREM,CRKL,CSRNP1,CSRNP2,CTTNBP2NL,CWC22,CX3CR1,CXCL16,CXCL17,CYP1A1,C…	277
	Cell Cycle,Gene Expression	Binding of DNA	1.12e-06		1.042	BCL10,CD4,CEBPD,CREM,CYP1A1,DNAJB1,EPC1,ETS2,FOSL2,HMGA1,ID2,IPMK,ITGA5,KLF13,KLF5,MAFK,MTF1,NR4A2,PAK1,PER1,RASSF1,S1PR1,SLC11A1,SRF,TFAP4,TSC22D3,YWHAZ	27
	Cancer,Organismal Injury and Abnormalities	Abdominal cancer	2.12e-07		1.039	ABTB1,ACRBP,ACTG1,ADAM11,ADAMTS1,AMOTL2,APOBR,AREG,ARHGAP4,ARID3A,ARID5A,ARL4C,ATF4,ATOSA,B3GNT8,B4GALT3,BBS10,BCL10,BCL11A,BCL2L1,BCL6B,BDNF,BTBD3,C1orf116,C3AR1,CADPS2,CCDC117,CCDC88B,CCDC88C,CCND2,CCNL1,CCR1,CCR5,CD180,CD4,CDR2,CEBPD,CEBPG,CELSR1,CHKA,CHSY1,CITED2,CLDND1,CLEC1A,CLEC9A,CLK1,CLK4,COL12A1,CREM,CRKL,CSRNP1,CSRNP2,CTTNBP2NL,CWC22,CX3CR1,CXCL16,CXCL17,CYP1A1,CYTH2,DENND4B,DNAJA1,DNA…	262
	Cell-To-Cell Signaling and Interaction,Hematological System Development and Function,Immune Cell Trafficking	Adhesion of immune cells	0.00105		1.029	CCR1,CCR5,CD4,Cmah,CX3CR1,HSP90AA1,HSP90AB1,ITGA5,JMJD6,MCAM,MYADM,NEDD9,NR4A3,PAK1,PER1,PTGER4	16
	Cellular Movement,Embryonic Development	Cell movement of embryonic cell lines	2.95e-05		1.027	CCR1,CCR5,CNN3,CRKL,EFNA1,EPHA2,FOXF1,HLX,IPMK,KLF2,NEDD9,PAK1,RASSF1	13
	Cell Death and Survival	Cell viability of stomach cancer cell lines	0.00267		1.026	AREG,BCL2L1,BCL6B,CCND2,RASSF1,RPS6KA2,SRF	7
	Cell Death and Survival,Cellular Development,Nervous System Development and Function,Tissue Development,Tissue Morphology	Regeneration of neurons	0.00248		1	BDNF,GDNF,KCNJ2,KLF4,NDEL1,SRF,ULK1	7
	Cellular Development,Cellular Growth and Proliferation,Embryonic Development,Nervous System Development and Function,Organ Development,Organismal Development,Tissue Development	Proliferation of neural precursor cells	0.003		1	CCR5,HES1,ID2,KLF4,LNX2,Nes,ZNF503	7
	Cardiovascular System Development and Function,Cellular Movement	Cell movement of endothelial cells	0.000146		0.98	ADAMTS1,BDNF,EFNA1,EGFL7,EPHA2,HLX,HSP90AA1,HSP90AB1,KLF2,MCAM,NR4A2,OSR1,PIM1,RCAN1,S1PR1,S1PR2,SPRY4,TNFRSF12A,TNFRSF25,YWHAZ	20
	Cellular Development,Cellular Growth and Proliferation,Embryonic Development,Organ Development,Organismal Development,Skeletal and Muscular System Development and Function,Tissue Development	Formation of muscle cells	0.000328		0.97	ACTG1,AREG,EPC1,FILIP1L,FOSL2,HSP90AA1,KLF10,KLF2,SPRY2,SRF,TNFRSF12A	11
	Cellular Movement	Transmigration of cells	0.00269		0.958	C3AR1,CCR1,CCR5,CX3CR1,HSP90AA1,HSP90AB1,MCAM,PAK1,SIAH2,TNFRSF25	10
	Hematological System Development and Function,Lymphoid Tissue Structure and Development,Tissue Morphology	Quantity of natural killer T lymphocytes	7.68e-05		0.949	BCL10,CCR5,CXCL16,ID2,IL17RB,S1PR1,TNFRSF25,TXNIP	8
	Cell Death and Survival	Cell viability of leukemia cell lines	0.003		0.943	BCL2L1,CCDC117,DNAJA1,HES1,HSP90AB1,IRF8,MCL1	7
	Cardiovascular System Development and Function,Organismal Development	Vasculogenesis	1.46e-08		0.942	ADAMTS1,BCL6B,BDNF,C3AR1,CCR5,CD180,CEBPD,CITED2,CRKL,CX3CR1,EFNA1,EGFL7,EPHA2,FOXF1,GDNF,GEM,HES1,HLX,ITGA5,KCNJ2,KLF10,KLF2,KLF4,KLF5,MCAM,NR4A2,NR4A3,NRARP,PAK1,PIM1,PPP1R16B,PTGIR,RCAN1,RGS2,S1PR1,S1PR2,SOX18,SPRY2,SPRY4,SRF,TAB1,TNFRSF10A,TNFRSF12A,TNFRSF25,YWHAZ	45
	Embryonic Development,Organismal Development	Growth of embryo	0.00189		0.937	BDNF,CCR5,CITED2,CX3CR1,FOXF1,HES1,HMGA1,ID2,KLF2,KLF4,LNX2,MCL1,Nes,NR4A3,OSR1,RIOX1,S1PR1,S1PR2,TSG101,ZNF503	20
	Cardiovascular System Development and Function,Cellular Development,Cellular Function and Maintenance,Cellular Growth and Proliferation,Organismal Development,Tissue Development	Proliferation of endothelial cells	0.000376		0.936	ADAMTS1,BDNF,EFNA1,EGFL7,FOXF1,KCNJ2,KLF2,MCAM,NR4A2,NRARP,PIM1,PPP1R16B,PTGIR,RCAN1,SPRY4,TNFRSF12A,TNFRSF25	17
	Tissue Morphology	Quantity of epithelial cells	0.00086		0.933	ATF4,BDNF,ERRFI1,GDNF,HES1,ID2,IQGAP2,KLF4,MCL1,SPRY2	10
	Molecular Transport	Quantity of metal	0.0016		0.928	ADAMTS1,BCL2L1,BDNF,C3AR1,CCR1,CCR5,CX3CR1,GNB1,HSP90AA1,KLF2,MCAM,MCL1,NEDD9,RGS2,S1PR1,S1PR2,SLC11A1,SLC40A1,TSC22D3,TXNIP	20
	Embryonic Development,Organ Development,Organismal Development,Renal and Urological System Development and Function,Tissue Development	Formation of kidney	0.000118		0.918	ADAMTS1,AREG,BDNF,CITED2,EFNA1,GDNF,GEM,ID2,JMJD6,LCAT,LRRC8A,NDEL1,OSR1,SPRY2,TET2,ZNG1A	16
	Cancer,Organismal Injury and Abnormalities	Extrapancreatic malignant tumor	5.12e-08		0.912	ABTB1,ACRBP,ACTG1,ADAM11,ADAMTS1,AMOTL2,APOBR,AREG,ARHGAP4,ARID3A,ARID5A,ARL4C,ATF4,ATOSA,B3GNT8,B4GALT3,BBS10,BCL10,BCL11A,BCL2L1,BCL6B,BDNF,BTBD3,C1orf116,C3AR1,CADPS2,CCDC117,CCDC88B,CCDC88C,CCND2,CCNL1,CCR1,CCR5,CD180,CD4,CDR2,CEBPD,CEBPG,CELSR1,CHKA,CHSY1,CITED2,CLDND1,CLEC1A,CLEC9A,CLK1,CLK4,CNN3,COL12A1,CREM,CRKL,CSRNP1,CSRNP2,CTTNBP2NL,CWC22,CX3CR1,CXCL16,CXCL17,CYP1A1,CYTH2,DENND4B,DNAJA…	274
	Molecular Transport	Transport of molecule	0.00234		0.912	Arf2,ATF4,BDNF,C3AR1,CADPS2,CCR1,CCR5,CD4,CHKA,CITED2,DNAJA1,DUSP16,GDNF,HMGA1,HSP90AA1,HSP90AB1,KCNJ2,KIF5C,KMO,LCAT,LRRC8A,NDEL1,NEDD9,NR4A3,NUP107,NUP54,OSR1,PACC1,PER1,PPP1R10,PTGER4,PTGIR,RAB3A,SAR1A,SEC14L1,SEC22B,SEC23A,SESN2,SLC11A1,SLC25A25,SLC38A2,SLC40A1,SNX18,TNFAIP8L3,TRPM2,TSG101,TXNIP,YWHAH,YWHAZ,ZNG1A	50
	Embryonic Development,Organismal Development,Reproductive System Development and Function	Development of reproductive system	0.000138		0.905	ACRBP,ADAMTS1,AREG,ATF4,BCL2L1,CCND2,CEBPD,CITED2,CREM,CRKL,DNAJA1,DND1,EPC1,GADD45G,GDNF,HMGA1,HSP90AB1,ID2,KLF6,LFNG,LRRC8A,NR4A3,NUP107,OSR1,PTGER4,SOCS5,SPATA2,SYDE1,TGFB1I1,TOB2,TSC22D3,USP42	32
	Cancer,Organismal Injury and Abnormalities	Abdominal neoplasm	9.14e-08		0.902	ABTB1,ACRBP,ACTG1,ADAM11,ADAMTS1,AMOTL2,APOBR,AREG,ARHGAP4,ARID3A,ARID5A,ARL4C,ATF4,ATOSA,B3GNT8,B4GALT3,BBS10,BCL10,BCL11A,BCL2L1,BCL6B,BDNF,BTBD3,C14orf119,C1orf116,C3AR1,CADPS2,CCDC117,CCDC88B,CCDC88C,CCND2,CCNL1,CCR1,CCR5,CD180,CD4,CDR2,CEBPD,CEBPG,CELSR1,CHKA,CHSY1,CITED2,CLDND1,CLEC1A,CLEC9A,CLK1,CLK4,COL12A1,CREM,CRKL,CSRNP1,CSRNP2,CTTNBP2NL,CWC22,CX3CR1,CXCL16,CXCL17,CYP1A1,CYTH2,DENND4B,…	265
	Cardiovascular Disease,Organismal Injury and Abnormalities	Formation of vascular lesion	0.000195		0.896	BDNF,CCR1,CCR5,CX3CR1,CXCL16,KLF2,KLF4,NR4A3,RCAN1	9
	Organismal Injury and Abnormalities,Skeletal and Muscular Disorders	Abnormality of limb	0.00218		0.896	ADAMTS1,ATF4,CCR1,CHSY1,COL12A1,EDARADD,ERRFI1,HPGD,KCNJ2,KLF10,KLF2,SESN2,SPRY2,SPRY4,TET2,TNFRSF12A,UBL4A	17
	Hematological System Development and Function,Lymphoid Tissue Structure and Development,Tissue Morphology	Quantity of memory T lymphocytes	0.00235		0.896	BCL2L1,BCL6B,BDNF,CXCL16,ID2,IPMK	6
	Cancer,Organismal Injury and Abnormalities	Upper abdominal cancer	0.000314		0.888	ACRBP,ACTG1,ADAM11,ADAMTS1,APOBR,AREG,ARHGAP4,ARID3A,ARL4C,ATF4,B4GALT3,BBS10,BCL10,BCL11A,BCL2L1,BCL6B,BDNF,C3AR1,CADPS2,CCDC88B,CCDC88C,CCND2,CCNL1,CCR1,CD4,CDR2,CELSR1,CHKA,CLDND1,CLEC1A,CLK1,COL12A1,CREM,CWC22,CX3CR1,CXCL16,CXCL17,CYP1A1,DENND4B,DNAJA1,DNAJB5,DND1,DSTN,DUSP16,DUSP3,DUSP8,DYNLL1,EDARADD,EGFL7,ENPEP,EPC1,EPHA2,ERRFI1,ETS2,EXOC8,FASTKD3,FBXO28,FBXO46,FCHO1,FILIP1L,FOSL2,FOXF1,FR…	187
	Cancer,Gastrointestinal Disease,Organismal Injury and Abnormalities	Digestive system cancer	6.31e-07		0.878	ABTB1,ACRBP,ACTG1,ADAM11,ADAMTS1,AMOTL2,APOBR,AREG,ARHGAP4,ARID3A,ARID5A,ARL4C,ATF4,ATOSA,B3GNT8,B4GALT3,BBS10,BCL10,BCL11A,BCL2L1,BCL6B,BDNF,BTBD3,C1orf116,C3AR1,CADPS2,CCDC117,CCDC88B,CCDC88C,CCND2,CCNL1,CCR1,CCR5,CD180,CD4,CDR2,CEBPD,CELSR1,CHKA,CHSY1,CITED2,CLDND1,CLEC1A,CLK1,CLK4,COL12A1,CREM,CSRNP2,CTTNBP2NL,CWC22,CX3CR1,CXCL16,CXCL17,CYP1A1,CYTH2,DENND4B,DNAJA1,DNAJB5,DND1,DSTN,DUSP16,DUSP…	248
	Cancer,Organismal Injury and Abnormalities	Intraabdominal organ tumor	8.98e-07		0.874	ABTB1,ACRBP,ACTG1,ADAM11,ADAMTS1,AMOTL2,APOBR,AREG,ARHGAP4,ARID3A,ARID5A,ARL4C,ATF4,ATOSA,B3GNT8,B4GALT3,BBS10,BCL10,BCL11A,BCL2L1,BCL6B,BDNF,BTBD3,C14orf119,C1orf116,C3AR1,CADPS2,CCDC117,CCDC88B,CCDC88C,CCND2,CCNL1,CCR1,CCR5,CD180,CD4,CDR2,CEBPD,CEBPG,CELSR1,CHKA,CHSY1,CITED2,CLDND1,CLEC1A,CLK1,CLK4,COL12A1,CREM,CRKL,CSRNP2,CTTNBP2NL,CWC22,CX3CR1,CXCL16,CXCL17,CYP1A1,CYTH2,DENND4B,DNAJA1,DNAJB5,…	259
	Embryonic Development,Organ Development,Organismal Development,Reproductive System Development and Function,Tissue Development	Development of internal genitalia	4.69e-05		0.857	ACRBP,ADAMTS1,ATF4,BCL2L1,CCND2,CITED2,CRKL,DNAJA1,EPC1,GADD45G,GDNF,KLF6,LFNG,LRRC8A,NR4A3,NUP107,PTGER4,SPATA2,TSC22D3	19
	Embryonic Development,Organ Development,Organismal Development,Reproductive System Development and Function,Tissue Development	Development of genital organ	0.000479		0.857	ACRBP,ADAMTS1,ATF4,BCL2L1,CCND2,CITED2,CREM,CRKL,DNAJA1,DND1,EPC1,GADD45G,GDNF,HMGA1,KLF6,LFNG,LRRC8A,NR4A3,NUP107,OSR1,PTGER4,SPATA2,TOB2,TSC22D3,USP42	25
	Cellular Development	Differentiation of tumor cell lines	7.52e-05		0.856	ATF4,BCL2L1,BDNF,CEBPD,CHKA,ETS2,FOXF1,GADD45G,HES1,KLF4,KLF6,MCC,MCL1,PTGER4,SH3BP2,SPRY2,SPRY4,SRF,TRIM16	19
	Organismal Injury and Abnormalities,Respiratory Disease	Lower respiratory tract disorder	0.000354		0.853	ATF4,BCL2L1,C3AR1,CCR1,CCR5,CD180,CEBPG,CITED2,CTTNBP2NL,ERRFI1,HPGD,LFNG,PDE4B,POLR2A,PTGER4,PTGIR,RGS2,SESN2,TAB1,TET2,TRIM16	21
	Cellular Movement	Cellular infiltration by blood cells	0.00146		0.843	AREG,BDNF,C3AR1,CCR1,CCR5,CX3CR1,CXCL16,CXCL17,EGFL7,EPHA2,IL17RB,IRX2,MCAM,PTGER4,PTGIR,S1PR2,SPRY2,TET2,TNFRSF10A,TRPM2,YWHAZ	21
	Embryonic Development,Organismal Development	Development of genitourinary system	7.67e-06		0.834	ACRBP,ADAMTS1,AREG,ATF4,BCL2L1,BDNF,C3AR1,CCND2,CEBPD,CITED2,CREM,CRKL,DNAJA1,DND1,EFNA1,EPC1,ERRFI1,GADD45G,GDNF,GEM,HMGA1,HSP90AB1,ID2,JMJD6,KLF6,LCAT,LFNG,LRRC8A,NDEL1,NR4A3,NUP107,OSR1,PTGER4,S1PR2,SOCS5,SPATA2,SPRY2,SYDE1,TET2,TGFB1I1,TOB2,TSC22D3,USP42,ZNG1A	44
	Cell Death and Survival,Embryonic Development,Organismal Injury and Abnormalities	Cell death of embryonic cell lines	2.92e-05		0.833	ATF4,BCL10,BCL2L1,CITED2,L3MBTL2,MCL1,MTF1,NDEL1,NR4A2,NR4A3,PPP1R10,RASSF1,SPATA2,SRF,TGFB1I1,TNFRSF10A,TNFRSF25,TRIM32,TRPM2,TSG101	20
	Cell Death and Survival,Organismal Injury and Abnormalities	Cell death of immune cells	9.01e-11		0.821	ATF4,BCL10,BCL11A,BCL2L1,C3AR1,CCND2,CCR5,CD4,CRKL,CX3CR1,EFNA1,ETS2,GADD45G,HES1,HSP90AB1,ID2,IL17RB,IRF8,ITGA5,KLF13,KLF2,KLF4,LRRC8A,MCL1,NR4A3,PIM1,PTGER4,RABGEF1,RCAN1,S1PR1,S1PR2,Serpinb6b,SESN2,SH3BP2,SPATA2,SPIB,TNFRSF25,TRIB2,TRPM2,TSC22D3,YWHAZ	41
	Cellular Movement	Cellular infiltration	0.000398		0.816	AREG,BDNF,C3AR1,CCR1,CCR5,CD4,CX3CR1,CXCL16,CXCL17,EGFL7,EPHA2,IL17RB,IRF8,IRX2,LCAT,MCAM,PTGER4,PTGIR,S1PR2,SPRY2,TET2,TNFRSF10A,TRPM2,YWHAZ	24
	Cancer,Organismal Injury and Abnormalities	Extracranial solid tumor	2.49e-06		0.811	ABTB1,ACRBP,ACTG1,ADAM11,ADAMTS1,AMOTL2,ANKRD63,APOBR,AREG,ARHGAP4,ARID3A,ARID5A,ARL4C,ATF4,ATOSA,B3GNT8,B4GALT3,BBS10,BCL10,BCL11A,BCL2L1,BCL6B,BDNF,BTBD3,C14orf119,C1orf116,C3AR1,CADPS2,CCDC117,CCDC88B,CCDC88C,CCND2,CCNL1,CCR1,CCR5,CD180,CD4,CDR2,CEBPD,CEBPG,CELSR1,CHKA,CHSY1,CITED2,CLDND1,CLEC1A,CLEC9A,CLK1,CLK4,CNN3,COL12A1,CREM,CRKL,CSRNP1,CSRNP2,CTTNBP2NL,CWC22,CX3CR1,CXCL16,CXCL17,CYP1A1,C…	276
	Cell-To-Cell Signaling and Interaction,Hematological System Development and Function	Binding of leukocytes	0.000949		0.793	CCR1,CCR5,CD4,Cmah,CX3CR1,HSP90AA1,HSP90AB1,ITGA5,JMJD6,LFNG,MCAM,MYADM,NEDD9,NR4A3,PAK1,PER1,PTGER4	17
	Cellular Development,Cellular Growth and Proliferation,Embryonic Development	Proliferation of embryonic cell lines	0.00276		0.792	CHKA,FOXF1,HSP90AA1,HSP90AB1,IQGAP2,KLF2,KLF4,LIG4,PIM1,Pvr,RASSF1,S1PR2,TSC22D3	13
	Embryonic Development,Organismal Development	Development of abdomen	6.63e-06		0.785	ADAMTS1,AREG,BCL2L1,BDNF,CCND2,CITED2,EFNA1,FOXF1,GADD45G,GDNF,GEM,HES1,HLX,ID2,JMJD6,KLF5,KLF6,LCAT,LFNG,LRRC8A,NDEL1,NR4A3,NUP107,OSR1,PTGER4,SLC40A1,SPIB,SPRY2,TET2,ZNG1A	30
	Cancer,Hematological Disease,Immunological Disease,Organismal Injury and Abnormalities	Lymphocytic cancer	5.74e-08		0.776	ACTG1,APOBR,ARHGAP4,ARID3A,BCL10,BCL11A,BCL2L1,BDNF,C1orf116,CADPS2,CCDC88B,CCDC88C,CCND2,CD180,CD4,CEBPD,CELSR1,CHSY1,CITED2,CLEC9A,CLK1,CLK4,COL12A1,CREM,CRKL,CX3CR1,CXCL16,CYP1A1,DUSP16,DUSP8,EDARADD,EGFL7,ENPEP,EPC1,EPHA2,FBXO28,FILIP1L,FOSL2,FOXF1,GADD45G,GEM,GNB1,HMGA1,HSP90AA1,HSP90AB1,ID2,IL17RB,IQGAP2,IRF8,ITGA5,KIF5C,KLF2,KLF4,KLF6,KMO,L3MBTL2,LFNG,LIG4,LNX2,LRRC8A,MCAM,MCC,MCL1,MICAL2,…	105
	Cancer,Hematological Disease,Organismal Injury and Abnormalities	Malignant lymphocytic neoplasm	5.74e-08		0.776	ACTG1,APOBR,ARHGAP4,ARID3A,BCL10,BCL11A,BCL2L1,BDNF,C1orf116,CADPS2,CCDC88B,CCDC88C,CCND2,CD180,CD4,CEBPD,CELSR1,CHSY1,CITED2,CLEC9A,CLK1,CLK4,COL12A1,CREM,CRKL,CX3CR1,CXCL16,CYP1A1,DUSP16,DUSP8,EDARADD,EGFL7,ENPEP,EPC1,EPHA2,FBXO28,FILIP1L,FOSL2,FOXF1,GADD45G,GEM,GNB1,HMGA1,HSP90AA1,HSP90AB1,ID2,IL17RB,IQGAP2,IRF8,ITGA5,KIF5C,KLF2,KLF4,KLF6,KMO,L3MBTL2,LFNG,LIG4,LNX2,LRRC8A,MCAM,MCC,MCL1,MICAL2,…	105
	Cancer,Hematological Disease,Immunological Disease,Organismal Injury and Abnormalities	Neoplasia of leukocytes	2.16e-07		0.776	ACTG1,APOBR,ARHGAP4,ARID3A,BCL10,BCL11A,BCL2L1,BDNF,C1orf116,CADPS2,CCDC88B,CCND2,CD180,CD4,CEBPD,CELSR1,CHSY1,CITED2,CLK1,CLK4,COL12A1,CREM,CRKL,CX3CR1,CXCL16,CYP1A1,DUSP16,DUSP8,EGFL7,ENPEP,EPC1,EPHA2,FILIP1L,FOSL2,FOXF1,GADD45G,GEM,GNB1,HMGA1,HSP90AA1,HSP90AB1,ID2,IL17RB,IQGAP2,IRF8,ITGA5,KIF5C,KLF2,KLF4,KLF6,KMO,L3MBTL2,LFNG,LIG4,LNX2,LRRC8A,MCAM,MCC,MCL1,MICAL2,NR4A2,NR4A3,PAK1,PDCD11,PDE4B,…	98
	Cell Death and Survival,Organismal Injury and Abnormalities	Apoptosis of B lymphocytes	1.25e-05		0.765	BCL10,BCL11A,BCL2L1,CRKL,KLF2,NR4A3,S1PR1,S1PR2,SH3BP2,SPIB,TSC22D3	11
	Cancer,Cellular Development,Cellular Growth and Proliferation,Organismal Injury and Abnormalities,Tumor Morphology	Proliferation of cancer cells	0.000287		0.758	AREG,BCL2L1,EFNA1,EPHA2,GDNF,HES1,HPGD,ID2,MCAM,NR4A2,PIM1,RCAN1,SPIB,TAX1BP3,TET2,TNFRSF12A,TXNIP,ULK1	18
	Cancer,Hematological Disease,Organismal Injury and Abnormalities	Hematologic cancer of cells	3.85e-07		0.749	ACTG1,APOBR,ARHGAP4,ARID3A,BCL10,BCL2L1,BDNF,C1orf116,CADPS2,CCDC88B,CCND2,CD180,CD4,CELSR1,CHSY1,CLK1,CLK4,COL12A1,CREM,CRKL,CX3CR1,CXCL16,CYP1A1,DUSP16,DUSP8,EGFL7,ENPEP,EPC1,EPHA2,FILIP1L,FOSL2,FOXF1,GADD45G,GEM,GNB1,HMGA1,HSP90AA1,HSP90AB1,ID2,IL17RB,IQGAP2,IRF8,ITGA5,KIF5C,KLF2,KLF4,KLF6,KMO,L3MBTL2,LFNG,LIG4,LNX2,LRRC8A,MCAM,MCL1,MICAL2,NR4A2,NR4A3,PAK1,PDCD11,PDE4B,PER1,PIM1,RABGEF1,RASGEF…	93
	Cancer,Hematological Disease,Immunological Disease,Organismal Injury and Abnormalities	Tumorigenesis of lymphocytes	3.94e-07		0.749	BCL10,BCL11A,BCL2L1,BDNF,C1orf116,CCND2,CD180,CD4,CEBPD,CELSR1,CITED2,CLK1,COL12A1,CREM,CRKL,CX3CR1,CXCL16,DUSP16,DUSP8,EGFL7,ENPEP,EPC1,EPHA2,FILIP1L,FOSL2,FOXF1,GADD45G,GEM,GNB1,HMGA1,HSP90AA1,HSP90AB1,ID2,IL17RB,IQGAP2,IRF8,ITGA5,KIF5C,KLF2,KLF4,KLF6,KMO,L3MBTL2,LFNG,LIG4,LNX2,LRRC8A,MCAM,MCC,MCL1,MICAL2,NR4A2,NR4A3,PAK1,PDCD11,PDE4B,PER1,PIM1,PTGER4,RASGEF1B,RASSF1,RESF1,RNF123,S1PR1,S1PR2,SE…	87
	Cell Death and Survival,Organismal Injury and Abnormalities	Apoptosis of stomach cancer cell lines	0.000575		0.742	BCL2L1,BCL6B,KLF2,KLF6,RASSF1,TNFRSF10A,TRPM2	7
	Cardiovascular System Development and Function	Development of vasculature	9.82e-11		0.73	ACTG1,ADAMTS1,AREG,BCL6B,BDNF,C3AR1,CCR5,CD180,CEBPD,CITED2,CRKL,CX3CR1,DUSP3,EFNA1,EGFL7,ENPEP,EPHA2,ERRFI1,FOXF1,GDNF,GEM,HES1,HLX,HPGD,HSP90AA1,IRX1,ITGA5,JMJD6,KCNJ2,KCTD10,KLF10,KLF2,KLF4,KLF5,KLF6,LFNG,MCAM,NR4A2,NR4A3,NRARP,PAK1,PIM1,PPP1R16B,PTGER4,PTGIR,RCAN1,RGS2,S1PR1,S1PR2,SIAH2,SOX18,SPRY2,SPRY4,SRF,SYDE1,TAB1,TNFRSF10A,TNFRSF12A,TNFRSF25,YWHAZ	60
	Cardiovascular System Development and Function,Organismal Development	Angiogenesis	3.4e-10		0.73	ACTG1,ADAMTS1,AREG,BCL6B,BDNF,C3AR1,CCR5,CD180,CEBPD,CITED2,CRKL,CX3CR1,DUSP3,EFNA1,EGFL7,ENPEP,EPHA2,FOXF1,GDNF,GEM,HES1,HLX,HSP90AA1,IRX1,ITGA5,JMJD6,KCNJ2,KCTD10,KLF10,KLF2,KLF4,KLF5,KLF6,MCAM,NR4A2,NR4A3,NRARP,PAK1,PIM1,PPP1R16B,PTGER4,PTGIR,RCAN1,RGS2,S1PR1,S1PR2,SOX18,SPRY2,SPRY4,SRF,TAB1,TNFRSF10A,TNFRSF12A,TNFRSF25,YWHAZ	55
	Hematological System Development and Function,Hematopoiesis,Lymphoid Tissue Structure and Development,Organ Morphology,Tissue Morphology	Quantity of double-negative T lymphocyte	0.0012		0.728	BCL10,BCL11A,BDNF,CD4,LRRC8A,MCL1	6
	Cell Death and Survival,Organismal Injury and Abnormalities,Renal and Urological Disease	Cell death of kidney cell lines	0.000534		0.725	BCL10,BCL2L1,CITED2,MCL1,NDEL1,NR4A3,PAK1,PPP1R10,RASSF1,SRF,TGFB1I1,TNFRSF10A,TNFRSF25,TRIM32,TRPM2	15
	Cancer,Organismal Injury and Abnormalities	Growth of malignant tumor	1.09e-05		0.706	AREG,BCL2L1,C3AR1,CRKL,EFNA1,EPHA2,GDNF,HES1,HPGD,ID2,MCAM,MCL1,Nes,NR4A2,PAK1,PIM1,PTGER4,RCAN1,SLC40A1,SPIB,TAX1BP3,TET2,TNFRSF12A,TXNIP,ULK1,ZFP36L2	26
	Organismal Development	Growth of vessel	0.0018		0.692	CD180,CEBPD,CREM,CX3CR1,ITGA5,KLF4,KLF5,NR4A3,PAK1,PIM1,PTGER4,SRF,TNFRSF10A	13
	Lymphoid Tissue Structure and Development,Tissue Morphology	Quantity of lymphoid tissue	1.43e-06		0.689	ARID3A,BCL10,BCL11A,BCL2L1,BDNF,CD180,CD4,ETS2,ID2,IRF8,KLF13,KLF2,KLF4,LIG4,LRRC8A,MCL1,NEDD9,PIM1,S1PR2,SH3BP2,SPIB,TET2,ZFP36L2	23
	Cancer,Hematological Disease,Immunological Disease,Organismal Injury and Abnormalities	Lymphoma	9.9e-08		0.688	BCL10,BCL2L1,CCND2,CD180,CD4,CLK1,COL12A1,CREM,CRKL,CXCL16,DUSP8,EGFL7,ENPEP,EPC1,EPHA2,FILIP1L,FOSL2,FOXF1,GADD45G,GNB1,HMGA1,HSP90AA1,HSP90AB1,ID2,IL17RB,IQGAP2,IRF8,ITGA5,KLF2,KLF4,KLF6,KMO,L3MBTL2,LFNG,LIG4,MCAM,MCL1,MICAL2,NR4A2,NR4A3,PAK1,PDCD11,PDE4B,PER1,PIM1,RASSF1,RESF1,RNF123,S1PR1,S1PR2,SEC14L1,SERTAD1,SIAH2,SNRK,SNX18,SP110,SPIB,TEP1,TET2,TFAP4,TGFB1I1,TNFRSF10A,YWHAZ,ZFP36L2,ZNF503,…	66
	Cell-mediated Immune Response,Cellular Development,Cellular Function and Maintenance,Cellular Growth and Proliferation,Embryonic Development,Hematological System Development and Function,Hematopoiesis,Lymphoid Tissue Structure and Development,Organ Development,Organismal Development,Tissue Development	T cell development	1.32e-09		0.673	AREG,BCL10,BCL11A,BDNF,C3AR1,CD4,DNAJB1,ETS2,GADD45G,HLX,HMGA1,HSP90AA1,ID2,IPMK,IRF8,JMJD6,KLF10,KLF2,KLF4,LFNG,LIG4,LRRC8A,MCL1,NR4A2,NRARP,PIM1,PTGER4,S1PR1,SOCS5,SPIB,SPRY2,SRF,TFAP4,TNFRSF25,ZFP36L2	35
	Cellular Function and Maintenance	Cellular homeostasis	1.53e-11		0.66	ADAMTS1,AREG,ATF4,BCL10,BCL11A,BCL2L1,BDNF,C3AR1,CADPS2,CCR1,CCR5,CD4,CXCL17,CYTH2,DNAJB1,DYNLL1,EPHA2,ETS2,EXOC8,GADD45G,GDNF,GNB1,HAAO,HLX,HMGA1,HSP90AA1,ID2,IL17RB,IPMK,IRF8,ITGA5,JMJD6,KCNJ2,KIF5C,KLF10,KLF2,KLF4,LFNG,LIG4,LRRC8A,MCAM,MCL1,MYADM,NEDD9,NR4A2,NRARP,ORAI2,PAK1,PDE4B,PIM1,PLEKHF1,PLEKHF2,PTGER4,RGS2,S1PR1,S1PR2,SEC22B,SESN2,SLC11A1,SLC25A25,SLC40A1,SNX18,SOCS5,SOCS7,SPIB,SPRY2,SR…	82
	Cellular Movement	Invasion of tumor cell lines	2.82e-07		0.658	ADAMTS1,AREG,ARHGAP4,ARID3A,BCL10,BCL11A,BCL2L1,BDNF,CCR1,CEBPD,CRKL,EFNA1,EPHA2,ETS2,FOXF1,GDNF,HES1,HMGA1,HSP90AA1,HSP90AB1,ID2,IRX1,ITGA5,KLF2,KLF4,KLF6,MAPK6,MCAM,MCL1,MEX3A,MICAL2,NEDD9,Nes,NR4A2,NR4A3,PAK1,PI4K2B,Pvr,RASSF1,S1PR2,SNIP1,SOCS5,SOX18,SPRY2,TAB1,TET2,TFAP4,TGFB1I1,TNFAIP6,TRPM2,ZNF217,ZNF503,ZNF507	53
	Hematological System Development and Function,Immune Cell Trafficking,Inflammatory Response,Tissue Development	Accumulation of leukocytes	0.000676		0.657	BCL10,CCR1,CCR5,CX3CR1,ETS2,IL17RB,ITGA5,KLF2,KLF4,S1PR1,S1PR2,SH3BP2,TNFRSF25,TSC22D3	14
	Cell Morphology,Cellular Assembly and Organization,Cellular Function and Maintenance	Reorganization of cytoskeleton	0.000692		0.655	CRKL,EFNA1,EPHA2,GDNF,IQGAP2,NEDD9,PAK1,S1PR1,S1PR2,SYDE1,TRPM2	11
	Cellular Function and Maintenance	Lymphocyte homeostasis	2.63e-09		0.639	AREG,BCL10,BCL11A,BDNF,C3AR1,CD4,DNAJB1,ETS2,GADD45G,HLX,HMGA1,HSP90AA1,ID2,IPMK,IRF8,JMJD6,KLF10,KLF2,KLF4,LFNG,LIG4,LRRC8A,MCL1,NR4A2,NRARP,PIM1,PTGER4,S1PR1,SLC40A1,SOCS5,SPIB,SPRY2,SRF,TFAP4,TNFRSF25,ZFP36L2	36
	Cellular Function and Maintenance	Homeostasis of blood cells	3.36e-10		0.634	AREG,BCL10,BCL11A,BDNF,C3AR1,CADPS2,CD4,DNAJB1,ETS2,GADD45G,HLX,HMGA1,HSP90AA1,ID2,IPMK,IRF8,JMJD6,KLF10,KLF2,KLF4,LFNG,LIG4,LRRC8A,MCL1,NR4A2,NRARP,PDE4B,PIM1,PTGER4,S1PR1,SLC40A1,SOCS5,SPIB,SPRY2,SRF,TET2,TFAP4,TNFRSF25,ZFP36L2	39
	Cellular Function and Maintenance	Homeostasis of leukocytes	1.35e-09		0.634	AREG,BCL10,BCL11A,BDNF,C3AR1,CD4,DNAJB1,ETS2,GADD45G,HLX,HMGA1,HSP90AA1,ID2,IPMK,IRF8,JMJD6,KLF10,KLF2,KLF4,LFNG,LIG4,LRRC8A,MCL1,NR4A2,NRARP,PDE4B,PIM1,PTGER4,S1PR1,SLC40A1,SOCS5,SPIB,SPRY2,SRF,TFAP4,TNFRSF25,ZFP36L2	37
	Organismal Injury and Abnormalities	Abdominal lesion	6.53e-08		0.631	ABTB1,ACRBP,ACTG1,ADAM11,ADAMTS1,AMOTL2,APOBR,AREG,ARHGAP4,ARID3A,ARID5A,ARL4C,ATF4,ATOSA,B3GNT8,B4GALT3,BBS10,BCL10,BCL11A,BCL2L1,BCL6B,BDNF,BTBD3,C14orf119,C1orf116,C3AR1,CADPS2,CCDC117,CCDC88B,CCDC88C,CCND2,CCNL1,CCR1,CCR5,CD180,CD4,CDR2,CEBPD,CEBPG,CELSR1,CHKA,CHSY1,CITED2,CLDND1,CLEC1A,CLEC9A,CLK1,CLK4,COL12A1,CREM,CRKL,CSRNP1,CSRNP2,CTTNBP2NL,CWC22,CX3CR1,CXCL16,CXCL17,CYP1A1,CYTH2,DENND4B,…	266
	Cellular Development,Cellular Growth and Proliferation,Hematological System Development and Function,Lymphoid Tissue Structure and Development	Proliferation of immune cells	9.58e-09		0.617	BCL10,BCL11A,BCL2L1,BCL6B,CCDC88B,CCND2,CCR5,CD180,CD4,Cmah,CXCL16,EFNA1,EPHA2,ETS2,HES1,HMGA1,Hoxaas2,ID2,IPMK,IRF8,ITGA5,KLF2,KLF4,LRRC8A,PIM1,PTGER4,RABGEF1,RCAN1,RGS2,S1PR1,S1PR2,SH3BP2,SLC40A1,SPIB,SPRY2,SRF,TET2,TNFRSF10A,TNFRSF25,TRPM2,TSC22D3,TSPAN32,TXNIP	43
	Cellular Movement,Hematological System Development and Function,Immune Cell Trafficking	Cellular infiltration by leukocytes	0.00302		0.616	AREG,BDNF,C3AR1,CCR1,CCR5,CX3CR1,CXCL16,CXCL17,EGFL7,EPHA2,IL17RB,IRX2,MCAM,PTGER4,PTGIR,S1PR2,SPRY2,TNFRSF10A,TRPM2,YWHAZ	20
	Cell-To-Cell Signaling and Interaction	Binding of blood cells	0.00124		0.613	CCR1,CCR5,CD4,Cmah,CX3CR1,HSP90AA1,HSP90AB1,IRF8,ITGA5,JMJD6,LFNG,MCAM,MYADM,NEDD9,NR4A3,PAK1,PER1,PTGER4	18
	Cancer,Organismal Injury and Abnormalities	Advanced malignant solid tumor	5.91e-05		0.61	ADAMTS1,ARL4C,BCL10,BCL2L1,CCND2,CEBPD,CRKL,EFNA1,EGFL7,ENPEP,EPHA2,FOXF1,HMGA1,HSP90AA1,HSP90AB1,ID2,IRF8,IRX1,KCNJ2,KLF4,KLF6,MCAM,MCL1,MDC1,PAK1,RASSF1,S1PR1,TET2,TFAP4,TNFRSF10A,TXNIP,YWHAZ,ZFP36L2,ZNF217	34
	Cancer,Hematological Disease,Immunological Disease,Organismal Injury and Abnormalities	B cell cancer	0.000298		0.6	BCL10,BCL11A,BCL2L1,BDNF,C1orf116,CCND2,CD180,CEBPD,CELSR1,CITED2,CLK1,COL12A1,CREM,CX3CR1,DUSP16,DUSP8,ENPEP,EPHA2,FILIP1L,GEM,GNB1,HSP90AA1,HSP90AB1,ID2,IQGAP2,IRF8,KIF5C,KLF2,LFNG,LIG4,LNX2,MCAM,MCC,MCL1,MICAL2,PDE4B,PIM1,PTGER4,RASGEF1B,RASSF1,RESF1,RNF123,S1PR1,S1PR2,SEC14L1,SESN2,SIAH2,SLC11A1,SNX18,SPIB,TET2,TFAP4,TGM4,TNFRSF10A,TOB2,TRIT1,YWHAZ,ZFP36L2,ZNF217,ZNF503	60
	Cancer,Hematological Disease,Immunological Disease,Organismal Injury and Abnormalities	B-cell neoplasm	0.00135		0.6	BCL10,BCL11A,BCL2L1,BDNF,C1orf116,CCND2,CD180,CEBPD,CELSR1,CITED2,CLK1,COL12A1,CREM,CX3CR1,DUSP16,DUSP8,ENPEP,EPHA2,FILIP1L,GEM,GNB1,HSP90AA1,HSP90AB1,ID2,IQGAP2,IRF8,KIF5C,KLF2,LFNG,LIG4,LNX2,LRRC8A,MCAM,MCC,MCL1,MICAL2,PDE4B,PIM1,PTGER4,RASGEF1B,RASSF1,RESF1,RNF123,S1PR1,S1PR2,SEC14L1,SESN2,SIAH2,SLC11A1,SNX18,SPIB,TET2,TFAP4,TGM4,TNFRSF10A,TOB2,TRIT1,YWHAZ,ZFP36L2,ZNF217,ZNF503	61
	Cell Death and Survival,Organismal Injury and Abnormalities	Apoptosis of granulocytes	0.00309		0.598	BCL2L1,C3AR1,IL17RB,IRF8,MCL1,PIM1	6
	Cell Death and Survival	Apoptosis of progenitor cells	1.57e-05		0.593	BCL11A,BCL2L1,EFNA1,ETS2,GDNF,GEM,HES1,ID2,IRF8,KLF13,KLF2,LRRC8A,SPIB,TNFRSF25,TSC22D3	15
	Hematological System Development and Function,Humoral Immune Response,Lymphoid Tissue Structure and Development,Tissue Morphology	Quantity of B lymphocytes	0.000158		0.592	ARID3A,BCL10,CD180,ID2,IPMK,IRF8,KLF2,KLF4,LIG4,LRRC8A,NEDD9,PIM1,S1PR1,S1PR2,SH3BP2,SPIB,SRF,TET2,TRIB2	19
	Cellular Movement	Migration of vascular cells	0.00104		0.585	ADAMTS1,BDNF,EFNA1,HLX,HSP90AB1,KLF2,NR4A2,PAK1,RCAN1,S1PR1,SPRY4,SRF,TNFRSF25	13
	Cell-To-Cell Signaling and Interaction,Hematological System Development and Function	Binding of lymphocytes	0.0004		0.582	CCR1,Cmah,HSP90AA1,HSP90AB1,ITGA5,JMJD6,LFNG,MCAM,MYADM,NEDD9	10
	Cancer,Gastrointestinal Disease,Organismal Injury and Abnormalities	Malignant neoplasm of large intestine	4.24e-06		0.577	ABTB1,ACRBP,ACTG1,ADAM11,ADAMTS1,AMOTL2,APOBR,AREG,ARHGAP4,ARID3A,ARID5A,ARL4C,ATF4,ATOSA,B3GNT8,B4GALT3,BCL10,BCL11A,BCL2L1,BCL6B,BDNF,BTBD3,C1orf116,C3AR1,CADPS2,CCDC117,CCDC88B,CCDC88C,CCND2,CCNL1,CCR1,CCR5,CD180,CD4,CEBPD,CELSR1,CHKA,CHSY1,CITED2,CLDND1,CLEC1A,CLK4,COL12A1,CREM,CSRNP2,CTTNBP2NL,CWC22,CX3CR1,CYP1A1,CYTH2,DENND4B,DNAJA1,DND1,DSTN,DUSP16,DUSP3,DUSP8,EGFL7,ENPEP,EPC1,EPHA2,ERLIN1…	218
	Cancer,Gastrointestinal Disease,Organismal Injury and Abnormalities	Colorectal cancer	0.00207		0.577	ABTB1,ACTG1,ADAM11,ADAMTS1,AMOTL2,APOBR,AREG,ARHGAP4,ARL4C,ATF4,ATOSA,B3GNT8,B4GALT3,BCL10,BCL11A,BCL2L1,BCL6B,BDNF,BTBD3,C1orf116,C3AR1,CADPS2,CCDC117,CCDC88B,CCDC88C,CCND2,CCR1,CCR5,CD4,CEBPD,CELSR1,CHSY1,CLDND1,CLK4,COL12A1,CSRNP2,CTTNBP2NL,CWC22,CX3CR1,DENND4B,DNAJA1,DND1,DSTN,DUSP16,DUSP3,EGFL7,EPC1,EPHA2,EXOC8,FASTKD3,FBXO46,FCHO1,FILIP1L,FOXF1,GDNF,GNB1,HES1,HID1,HLX,HMGA1,HSP90AA1,HSP90AB…	138
	Cancer,Organismal Injury and Abnormalities	Non-melanoma solid tumor	7.67e-08		0.559	ABTB1,ACRBP,ACTG1,ADAM11,ADAMTS1,AMOTL2,ANKRD63,APOBR,AREG,ARHGAP4,ARID3A,ARID5A,ARL4C,ATF4,ATOSA,B3GNT8,B4GALT3,BBS10,BCL10,BCL11A,BCL2L1,BCL6B,BDNF,BTBD3,C14orf119,C1orf116,C3AR1,CADPS2,CCDC117,CCDC88B,CCDC88C,CCND2,CCNL1,CCR1,CCR5,CD180,CD4,CDR2,CEBPD,CEBPG,CELSR1,CHKA,CHSY1,CITED2,CLDND1,CLEC1A,CLEC9A,CLK1,CLK4,CNN3,COL12A1,CREM,CRKL,CSRNP1,CSRNP2,CTTNBP2NL,CWC22,CX3CR1,CXCL16,CXCL17,CYP1A1,C…	276
	Cell Death and Survival,Organismal Injury and Abnormalities	Apoptosis of hematopoietic cells	0.00015		0.559	BCL11A,BCL2L1,EFNA1,ETS2,GEM,IRF8,KLF13,KLF2,LRRC8A,PIM1,SPIB,TNFRSF25,TSC22D3	13
	Cellular Movement	Invasion of breast cancer cell lines	0.000509		0.557	ADAMTS1,BCL11A,CEBPD,HMGA1,HSP90AA1,HSP90AB1,ID2,ITGA5,KLF4,KLF6,MCAM,PAK1,PI4K2B,RASSF1,S1PR2,SNIP1,TAB1,ZNF217,ZNF503	19
	Cell Death and Survival,Organismal Injury and Abnormalities	Cell death of melanoma cell lines	0.000625		0.557	ATF4,BCL2L1,CCND2,DYNLL1,GADD45G,IL17RB,IPMK,KLF5,MCL1,MDC1,PPP1R10,RASSF1,SESN2	13
	Cancer,Organismal Injury and Abnormalities	Advanced extracranial solid tumor	0.000348		0.555	ADAMTS1,ARL4C,BCL10,BCL2L1,CCND2,CEBPD,CRKL,EGFL7,ENPEP,EPHA2,FOXF1,HMGA1,HSP90AA1,HSP90AB1,ID2,IRX1,KCNJ2,KLF6,MCAM,MCL1,RASSF1,S1PR1,TFAP4,TNFRSF10A,TXNIP,ZFP36L2,ZNF217	27
	Cell Death and Survival,Organismal Injury and Abnormalities	Cell death of lymphatic system cells	1.57e-06		0.545	BCL10,BCL11A,BCL2L1,C3AR1,CCR5,CD4,CRKL,EFNA1,ETS2,HMGA1,ID2,KLF13,KLF2,LRRC8A,MCL1,NR4A3,PIM1,RCAN1,S1PR1,S1PR2,SH3BP2,SPIB,TNFRSF25,TSC22D3	24
	Cellular Development,Cellular Growth and Proliferation,Organ Development,Skeletal and Muscular System Development and Function,Tissue Development	Proliferation of smooth muscle cells	0.000762		0.541	C3AR1,CD180,CEBPD,CXCL16,ID2,KLF4,KLF5,NR4A2,NR4A3,PAK1,PTGIR,S1PR1,SRF,TNFRSF10A	14
	Hematological System Development and Function,Humoral Immune Response,Lymphoid Tissue Structure and Development,Tissue Morphology	Quantity of marginal-zone B lymphocytes	0.000151		0.539	ARID3A,BCL10,IRF8,KLF2,LRRC8A,NEDD9,SH3BP2,TET2	8
	Cell-To-Cell Signaling and Interaction,Hematological System Development and Function	Binding of mononuclear leukocytes	0.000142		0.534	CCR1,CCR5,CD4,Cmah,HSP90AA1,HSP90AB1,ITGA5,JMJD6,LFNG,MCAM,MYADM,NEDD9	12
	Cell Death and Survival	Cell death of nervous tissue cell lines	0.00295		0.532	BCL2L1,GDNF,HSP90AA1,HSP90AB1,ID2,RCAN1	6
	Cancer,Organismal Injury and Abnormalities,Reproductive System Disease	Genital tumor	6.56e-06		0.529	ABTB1,ACRBP,ACTG1,ADAMTS1,APOBR,ARHGAP4,ARID3A,ARL4C,ATF4,ATOSA,B4GALT3,BBS10,BCL10,BCL11A,BCL2L1,BCL6B,BDNF,BTBD3,C1orf116,C3AR1,CADPS2,CCDC117,CCDC88B,CCDC88C,CCND2,CD180,CDR2,CEBPG,CELSR1,CLDND1,CLEC9A,CLK1,CLK4,COL12A1,CREM,CRKL,CSRNP1,CWC22,CXCL16,CYP1A1,DENND4B,DNAJA1,DNAJB5,DND1,DSTN,DUSP16,EFNA1,EGFL7,ENPEP,EPC1,EPHA2,ERLIN1,ERRFI1,ETS2,EXOC8,FASTKD3,FBXO46,FCHO1,FILIP1L,FOSL2,FRMD6,GDNF,…	182
	Cancer,Organismal Injury and Abnormalities	Cancer of cells	2.07e-05		0.523	ACTG1,ADAMTS1,APOBR,ARHGAP4,ARID3A,ATF4,B4GALT3,BCL10,BCL11A,BCL2L1,BCL6B,BDNF,C1orf116,CADPS2,CCDC88B,CCDC88C,CCND2,CCR5,CD180,CD4,CDR2,CEBPD,CELSR1,CHSY1,CITED2,CLEC1A,CLK1,CLK4,COL12A1,CREM,CRKL,CSRNP1,CX3CR1,CXCL16,CYP1A1,DENND4B,DNAJA1,DNAJB5,DUSP16,DUSP8,EGFL7,ENPEP,EPC1,EPHA2,FILIP1L,FOSL2,FOXF1,FRMD6,GADD45G,GEM,GNB1,HES1,HMGA1,HSP90AA1,HSP90AB1,ID2,IL17RB,IPMK,IQGAP2,IRF8,IRX1,ITGA5,KCNJ…	149
	Hematological System Development and Function,Lymphoid Tissue Structure and Development,Tissue Morphology	Quantity of T lymphocytes	4.73e-08		0.522	ARID5A,BCL10,BCL11A,BCL2L1,BCL6B,BDNF,C3AR1,CCR1,CCR5,CD4,Ctla2a/Ctla2b,CXCL16,CXCL17,CYP1A1,ETS2,ID2,IL17RB,IPMK,IRF8,KLF10,KLF13,KLF4,LIG4,LRRC8A,MCL1,PIM1,PTGIR,Pvr,S1PR1,S1PR2,TNFRSF25,TRIB2,TXNIP,UBL4A	34
	Cancer,Gastrointestinal Disease,Organismal Injury and Abnormalities	Digestive organ tumor	2.6e-07		0.521	ABTB1,ACRBP,ACTG1,ADAM11,ADAMTS1,AMOTL2,APOBR,AREG,ARHGAP4,ARID3A,ARID5A,ARL4C,ATF4,ATOSA,B3GNT8,B4GALT3,BBS10,BCL10,BCL11A,BCL2L1,BCL6B,BDNF,BTBD3,C14orf119,C1orf116,C3AR1,CADPS2,CCDC117,CCDC88B,CCDC88C,CCND2,CCNL1,CCR1,CCR5,CD180,CD4,CDR2,CEBPD,CELSR1,CHKA,CHSY1,CITED2,CLDND1,CLEC1A,CLK1,CLK4,COL12A1,CREM,CSRNP2,CTTNBP2NL,CWC22,CX3CR1,CXCL16,CXCL17,CYP1A1,CYTH2,DENND4B,DNAJA1,DNAJB5,DND1,DSTN,D…	252
	Embryonic Development,Organismal Development	Development of body axis	0.000118		0.51	AREG,ATF4,BCL2L1,BDNF,BTBD3,C3AR1,CCND2,CCR5,CEBPD,CELSR1,CHSY1,CITED2,CREM,CRKL,CSRNP1,CX3CR1,DYNLL1,EDARADD,EFNA1,EPHA2,FOSL2,FOXF1,GDNF,HES1,ID2,IPMK,ITGA5,KLF2,KLF4,LNX2,NDEL1,Nes,NR4A2,NR4A3,OSR1,PAK1,S1PR1,S1PR2,SPRY2,SPRY4,SRF,TNFRSF12A,YWHAH,ZNF503	44
	Embryonic Development,Organismal Development	Development of head	0.000144		0.51	AREG,ATF4,BCL2L1,BDNF,BTBD3,C3AR1,CCND2,CCR5,CEBPD,CELSR1,CHSY1,CREM,CRKL,CSRNP1,CX3CR1,DYNLL1,EDARADD,EFNA1,EPHA2,FOSL2,GDNF,HES1,ID2,IPMK,ITGA5,KLF2,KLF4,LNX2,NDEL1,Nes,NR4A2,NR4A3,OSR1,PAK1,S1PR1,S1PR2,SPRY2,SPRY4,SRF,TNFRSF12A,YWHAH,ZNF503	42
	Embryonic Development,Organismal Development,Tissue Development	Growth of embryonic tissue	0.002		0.508	BDNF,CCR5,CX3CR1,FOXF1,HES1,ID2,KLF4,LNX2,Nes,NR4A3,RIOX1,S1PR1,S1PR2,ZNF503	14
	Cancer,Organismal Injury and Abnormalities	Genitourinary tumor	3.05e-06		0.499	ABTB1,ACRBP,ACTG1,ADAM11,ADAMTS1,AMOTL2,APOBR,AREG,ARHGAP4,ARID3A,ARL4C,ATF4,ATOSA,B4GALT3,BBS10,BCL10,BCL11A,BCL2L1,BCL6B,BDNF,BTBD3,C1orf116,C3AR1,CADPS2,CCDC117,CCDC88B,CCDC88C,CCND2,CCNL1,CCR1,CCR5,CD180,CD4,CDR2,CEBPD,CEBPG,CELSR1,CHKA,CLDND1,CLEC9A,CLK1,CLK4,COL12A1,CREM,CRKL,CSRNP1,CWC22,CX3CR1,CXCL16,CYP1A1,DENND4B,DNAJA1,DNAJB5,DND1,DSTN,DUSP16,EFNA1,EGFL7,ENPEP,EPC1,EPHA2,ERLIN1,ERRFI1,…	215
	Hematological System Development and Function,Tissue Development	Accumulation of blood cells	0.000522		0.498	BCL10,CCR1,CCR5,CX3CR1,ETS2,IL17RB,ITGA5,KLF2,KLF4,PIM1,S1PR1,S1PR2,SH3BP2,TNFRSF25,TSC22D3	15
	Cancer,Hematological Disease,Organismal Injury and Abnormalities	Hematologic cancer	1.78e-07		0.494	ABTB1,ACTG1,APOBR,ARHGAP4,ARID3A,ATF4,BBS10,BCL10,BCL11A,BCL2L1,BDNF,C1orf116,CADPS2,CCDC88B,CCDC88C,CCND2,CCNL1,CCR5,CD180,CD4,CEBPD,CELSR1,CHSY1,CITED2,CLEC9A,CLK1,CLK4,COL12A1,CREM,CRKL,CX3CR1,CXCL16,CYP1A1,DENND4B,DUSP16,DUSP8,EDARADD,EGFL7,ENPEP,EPC1,EPHA2,FBXO28,FILIP1L,FOSL2,FOXF1,GADD45G,GEM,GNB1,HES1,HLX,HMGA1,HSP90AA1,HSP90AB1,ID2,IL17RB,IQGAP2,IRF8,ITGA5,KIF5C,KLF10,KLF2,KLF4,KLF6,KMO,…	125
	Cellular Development,Cellular Growth and Proliferation,Hematological System Development and Function,Hematopoiesis,Tissue Development	Differentiation of hematopoietic progenitor cells	0.000205		0.488	ATF4,BCL2L1,CEBPD,CITED2,GADD45G,HES1,HMGA1,ID2,IRF8,KLF4,LFNG,LIG4,LRRC8A,MAFK,SPIB,SRF,TET2,TNFRSF12A,ZNF831	19
	Cell Death and Survival,Organismal Injury and Abnormalities,Renal and Urological Disease	Cell death of kidney cells	0.000215		0.482	BCL10,BCL2L1,CITED2,KMO,MCL1,NDEL1,NR4A3,PAK1,PPP1R10,RASSF1,RCAN1,SESN2,SRF,TGFB1I1,TNFRSF10A,TNFRSF25,TRIM32,TRPM2	18
	Cancer,Hematological Disease,Organismal Injury and Abnormalities	Hematopoietic neoplasm	1.31e-07		0.467	ABTB1,ACTG1,APOBR,ARHGAP4,ARID3A,ATF4,BBS10,BCL10,BCL11A,BCL2L1,BDNF,C1orf116,CADPS2,CCDC88B,CCDC88C,CCND2,CCNL1,CCR5,CD180,CD4,CEBPD,CEBPG,CELSR1,CHSY1,CITED2,CLEC9A,CLK1,CLK4,COL12A1,CREM,CRKL,CX3CR1,CXCL16,CYP1A1,DENND4B,DUSP16,DUSP8,EDARADD,EGFL7,ENPEP,EPC1,EPHA2,FBXO28,FILIP1L,FOSL2,FOXF1,GADD45G,GDNF,GEM,GNB1,HES1,HLX,HMGA1,HSP90AA1,HSP90AB1,ID2,IL17RB,IQGAP2,IRF8,ITGA5,KIF5C,KLF10,KLF2,KLF…	127
	Cancer,Hematological Disease,Organismal Injury and Abnormalities	Myeloid or lymphoid neoplasm	1.47e-07		0.466	ABTB1,ACTG1,APOBR,ARHGAP4,ARID3A,ATF4,BBS10,BCL10,BCL11A,BCL2L1,BDNF,C1orf116,CADPS2,CCDC88B,CCDC88C,CCND2,CCNL1,CCR5,CD180,CD4,CEBPD,CEBPG,CELSR1,CHSY1,CITED2,CLEC9A,CLK1,CLK4,COL12A1,CREM,CRKL,CX3CR1,CXCL16,CYP1A1,DENND4B,DUSP16,DUSP8,EDARADD,EGFL7,ENPEP,EPC1,EPHA2,FBXO28,FILIP1L,FOSL2,FOXF1,GADD45G,GEM,GNB1,HES1,HLX,HMGA1,HSP90AA1,HSP90AB1,ID2,IL17RB,IQGAP2,IRF8,ITGA5,KIF5C,KLF10,KLF2,KLF4,KLF…	126
	Cancer,Hematological Disease,Organismal Injury and Abnormalities	Neoplasia of blood cells	7.44e-07		0.466	ABTB1,ACTG1,APOBR,ARHGAP4,ARID3A,ATF4,BBS10,BCL10,BCL11A,BCL2L1,BDNF,C1orf116,CADPS2,CCDC88B,CCND2,CCNL1,CCR5,CD180,CD4,CEBPD,CEBPG,CELSR1,CHSY1,CITED2,CLK1,CLK4,COL12A1,CREM,CRKL,CX3CR1,CXCL16,CYP1A1,DENND4B,DUSP16,DUSP8,EGFL7,ENPEP,EPC1,EPHA2,FILIP1L,FOSL2,FOXF1,GADD45G,GEM,GNB1,HES1,HLX,HMGA1,HSP90AA1,HSP90AB1,ID2,IL17RB,IQGAP2,IRF8,ITGA5,KIF5C,KLF10,KLF2,KLF4,KLF6,KMO,L3MBTL2,LFNG,LIG4,LNX2,L…	119
	Tissue Development	Accumulation of cells	0.000376		0.466	BCL10,CCR1,CCR5,CX3CR1,CXCL16,ETS2,IL17RB,ITGA5,KLF2,KLF4,PIM1,S1PR1,S1PR2,SH3BP2,SRF,TNFRSF25,TSC22D3	17
	Cellular Development,Cellular Growth and Proliferation,Connective Tissue Development and Function,Tissue Development	Cell proliferation of fibroblasts	0.00011		0.464	AREG,ARID3A,ATF4,CCND2,CITED2,CRKL,FOSL2,FRMD6,GEM,ITGA5,KLF4,LIG4,PIM1,S1PR2,SERTAD1,SPRY2,TGFB1I1,TSG101,TXNIP	19
	Cell Death and Survival,Organismal Injury and Abnormalities	Cell death of blood cells	2.15e-10		0.454	ATF4,BCL10,BCL11A,BCL2L1,C3AR1,CCND2,CCR5,CD4,CRKL,CX3CR1,EFNA1,ETS2,GADD45G,GEM,HES1,HSP90AB1,ID2,IL17RB,IRF8,ITGA5,KLF13,KLF2,KLF4,LRRC8A,MCL1,NR4A3,PIM1,PTGER4,RABGEF1,RCAN1,S1PR1,S1PR2,Serpinb6b,SESN2,SH3BP2,SPATA2,SPIB,TNFRSF25,TRIB2,TRPM2,TSC22D3,YWHAZ	42
	Cellular Development,Cellular Growth and Proliferation	Proliferation of progenitor cells	1.17e-07		0.452	BCL11A,BCL2L1,BDNF,CCND2,ETS2,GDNF,HES1,HMGA1,IRF8,ITGA5,KLF10,KLF2,KLF4,LRRC8A,NR4A3,PIM1,S1PR1,S1PR2,SOX18,SPIB,SPRY2,TET2,TNFRSF12A,TXNIP	24
	Hematological System Development and Function,Tissue Morphology	Quantity of granulocytes	0.00016		0.452	BCL6B,C3AR1,CCR1,CCR5,CEBPG,CYP1A1,CYTH2,EPHA2,FOSL2,IL17RB,IRF8,KLF5,MCL1,PDE4B,PTGIR,SPRY2,TNFRSF25,ZFP36L2	18
	Embryonic Development,Endocrine System Development and Function,Organ Development,Organismal Development,Reproductive System Development and Function,Tissue Development	Gonadogenesis	0.000475		0.452	ACRBP,ADAMTS1,ATF4,BCL2L1,CCND2,CITED2,CREM,CRKL,DNAJA1,DND1,EPC1,GADD45G,GDNF,HMGA1,LFNG,LRRC8A,NR4A3,NUP107,OSR1,PTGER4,SPATA2,TOB2,TSC22D3,USP42	24
	Organ Morphology,Tissue Morphology	Quantity of exocrine cells	0.000605		0.447	BDNF,HES1,KLF4,SPRY2,TSC22D3	5
	Cell Death and Survival,Organismal Injury and Abnormalities	Cell death of epithelial cells	5.02e-05		0.442	BCL10,BCL2L1,BDNF,CEBPD,CITED2,DYNLL1,EPHA2,ID2,IQGAP2,ITGA5,KLF10,MCL1,NDEL1,NR4A3,PAK1,PIM1,PPP1R10,RASSF1,RCAN1,S1PR1,SRF,TGFB1I1,TNFRSF10A,TNFRSF25,TRIM32,TRPM2	26
	Infectious Diseases,Organismal Injury and Abnormalities	Infection by RNA virus	0.000273		0.439	ABTB1,ARID5A,ARL4C,BCL11A,BCL2L1,C3AR1,CCR1,CCR5,CD4,CLDND1,CSRNP1,CX3CR1,CXCL16,CXCL17,CYP1A1,DNAJB1,DUSP16,EPHA2,ETS2,HES1,HID1,IRF8,KCNJ2,KLF2,KLF6,LNX2,NR4A2,NUP107,PAK1,PDE4B,PIM1,POLR2A,PTGER4,RAB3A,RGS2,SEC14L1,SP110,TFAP4,TSG101,TXNIP,YWHAZ,ZFP36L2,ZNF831	43
	Cell Death and Survival,Organismal Injury and Abnormalities	Apoptosis of leukocytes	7.3e-08		0.432	BCL10,BCL11A,BCL2L1,C3AR1,CCR5,CD4,CRKL,EFNA1,ETS2,GADD45G,HSP90AB1,IL17RB,IRF8,KLF13,KLF2,KLF4,LRRC8A,MCL1,NR4A3,PIM1,PTGER4,RCAN1,S1PR1,S1PR2,SH3BP2,SPIB,TNFRSF25,TSC22D3	28
	Cellular Development,Cellular Growth and Proliferation	Colony formation of carcinoma cell lines	0.000113		0.426	CRKL,HMGA1,HPGD,KLF4,KLF6,RASSF1,SLC40A1,TET2,TRIT1	9
	Lymphoid Tissue Structure and Development,Tissue Morphology	Quantity of lymphatic system cells	4.88e-11		0.422	ARID3A,ARID5A,BCL10,BCL11A,BCL2L1,BCL6B,BDNF,C3AR1,CCR1,CCR5,CD180,CD4,Ctla2a/Ctla2b,CX3CR1,CXCL16,CXCL17,CYP1A1,EPHA2,ETS2,FOSL2,ID2,IL17RB,IPMK,IRF8,KLF10,KLF13,KLF2,KLF4,LIG4,LRRC8A,MCL1,NEDD9,PIM1,PTGIR,Pvr,RCAN1,S1PR1,S1PR2,SH3BP2,SPIB,SPRY2,SRF,TET2,TNFRSF10A,TNFRSF25,TRIB2,TXNIP,UBL4A,ZFP36L2	49
	Cancer,Organismal Injury and Abnormalities	Lymphoreticular neoplasm	1.29e-05		0.419	ABTB1,ARID3A,ATF4,BBS10,BCL10,BCL2L1,CCND2,CCNL1,CCR5,CD180,CD4,CEBPD,CEBPG,CLK1,COL12A1,CREM,CRKL,CXCL16,DENND4B,DUSP8,EGFL7,ENPEP,EPC1,EPHA2,FILIP1L,FOSL2,FOXF1,GADD45G,GNB1,HES1,HLX,HMGA1,HSP90AA1,HSP90AB1,ID2,IL17RB,IQGAP2,IRF8,ITGA5,KLF10,KLF2,KLF4,KLF6,KMO,L3MBTL2,LFNG,LIG4,MCAM,MCL1,MDC1,MICAL2,MUCL3,NR4A2,NR4A3,NRARP,NUP54,PAK1,PDCD11,PDE4B,PER1,PIM1,POLR2A,RASGEF1B,RASSF1,RESF1,RNF123,S1…	91
	Cell-mediated Immune Response,Cellular Development,Cellular Function and Maintenance,Cellular Growth and Proliferation,Embryonic Development,Hematological System Development and Function,Hematopoiesis,Lymphoid Tissue Structure and Development,Organ Development,Organismal Development,Tissue Development	Differentiation of helper T lymphocytes	4.06e-05		0.417	AREG,C3AR1,DNAJB1,GADD45G,HLX,ID2,IRF8,KLF10,KLF4,LFNG,NR4A2,PTGER4,SOCS5,SPRY2	14
	Hematological System Development and Function,Humoral Immune Response,Lymphoid Tissue Structure and Development,Tissue Morphology	Quantity of B-1 lymphocytes	0.000746		0.415	ARID3A,BCL10,IRF8,KLF2,SH3BP2,SRF,TET2	7
	Cellular Development,Cellular Growth and Proliferation	Proliferation of myeloid cells	9.05e-05		0.393	BCL2L1,CCND2,CXCL16,HMGA1,IRF8,KLF4,NR4A3,PIM1,RABGEF1,RCAN1,SLC40A1,SPIB,TNFRSF12A	13
	Cardiovascular System Development and Function,Cellular Movement	Migration of vascular endothelial cells	0.000671		0.392	ADAMTS1,BDNF,EFNA1,HLX,HSP90AB1,KLF2,NR4A2,RCAN1,S1PR1,SPRY4,TNFRSF25	11
	Embryonic Development,Nervous System Development and Function,Organ Development,Organismal Development,Tissue Development	Formation of brain	0.000918		0.391	BCL2L1,BDNF,BTBD3,CCND2,CREM,CRKL,CX3CR1,DYNLL1,EFNA1,EPHA2,GDNF,HES1,ID2,IPMK,NDEL1,NR4A2,NR4A3,PAK1,S1PR1,SPRY2,SPRY4,SRF,YWHAH	23
	Cellular Development,Cellular Growth and Proliferation	Colony formation of lung cancer cell lines	0.00236		0.391	CRKL,GADD45G,KLF6,RASSF1,TRIT1	5
	Cell Death and Survival,Organismal Injury and Abnormalities	Cell death of lymphocytes	4.19e-06		0.386	BCL10,BCL11A,BCL2L1,C3AR1,CCR5,CD4,CRKL,EFNA1,ETS2,ID2,KLF13,KLF2,LRRC8A,MCL1,NR4A3,RCAN1,S1PR1,S1PR2,SH3BP2,SPIB,TNFRSF25,TSC22D3	22
	Cell Death and Survival,Organismal Injury and Abnormalities	Apoptosis of epithelial cell lines	0.00027		0.386	BCL10,BCL2L1,CEBPD,CITED2,DYNLL1,ITGA5,MCL1,NR4A3,PIM1,TGFB1I1,TNFRSF10A,TNFRSF25,TRIM32	13
	Cancer,Organismal Injury and Abnormalities	Liquid tumor	7.26e-05		0.371	ABTB1,ACTG1,APOBR,ARHGAP4,ARID3A,ATF4,BBS10,BCL10,BCL2L1,BDNF,C1orf116,CADPS2,CCDC88B,CCND2,CCNL1,CCR5,CD180,CD4,CEBPD,CEBPG,CELSR1,CHSY1,CLK4,COL12A1,CX3CR1,CYP1A1,DENND4B,DUSP16,DUSP8,ENPEP,EPHA2,FILIP1L,FOXF1,GADD45G,GEM,GNB1,HES1,HLX,HMGA1,HSP90AA1,HSP90AB1,ID2,IL17RB,IRF8,ITGA5,KIF5C,KLF10,KLF4,LFNG,LNX2,LRRC8A,MCAM,MCL1,MDC1,MICAL2,MUCL3,NR4A3,NRARP,NUP54,PDE4B,PIM1,POLR2A,RABGEF1,RASGEF1B,…	87
	Cellular Development,Cellular Growth and Proliferation,Hematological System Development and Function,Lymphoid Tissue Structure and Development	Cell proliferation of T lymphocytes	0.000124		0.371	BCL10,BCL2L1,BCL6B,CCDC88B,CCR5,CD4,EFNA1,ETS2,HES1,Hoxaas2,ID2,IRF8,KLF2,KLF4,LRRC8A,PIM1,PTGER4,RCAN1,RGS2,SPRY2,SRF,TNFRSF10A,TNFRSF25,TRPM2,TSC22D3,TSPAN32,TXNIP	27
	Cancer,Hematological Disease,Immunological Disease,Organismal Injury and Abnormalities	Leukemia	0.000187		0.371	ABTB1,ACTG1,APOBR,ARHGAP4,ARID3A,ATF4,BBS10,BCL10,BCL2L1,BDNF,C1orf116,CADPS2,CCDC88B,CCND2,CCNL1,CCR5,CD180,CD4,CELSR1,CHSY1,CLK4,COL12A1,CX3CR1,CYP1A1,DENND4B,DUSP16,DUSP8,ENPEP,EPHA2,FILIP1L,FOXF1,GADD45G,GEM,GNB1,HES1,HLX,HMGA1,HSP90AA1,HSP90AB1,IL17RB,IRF8,ITGA5,KIF5C,KLF10,KLF4,LFNG,LNX2,LRRC8A,MCAM,MCL1,MDC1,MICAL2,MUCL3,NRARP,NUP54,PDE4B,PIM1,POLR2A,RABGEF1,RASGEF1B,RNF123,S1PR1,S1PR2,SES…	82
	Cancer,Hematological Disease,Organismal Injury and Abnormalities	Myelodysplastic syndrome or leukemia	0.000285		0.371	ABTB1,ACTG1,APOBR,ARHGAP4,ARID3A,ATF4,BBS10,BCL10,BCL2L1,BDNF,C1orf116,CADPS2,CCDC88B,CCND2,CCNL1,CCR5,CD180,CD4,CELSR1,CHSY1,CLK4,COL12A1,CX3CR1,CYP1A1,DENND4B,DUSP16,DUSP8,ENPEP,EPHA2,FILIP1L,FOXF1,GADD45G,GEM,GNB1,HES1,HLX,HMGA1,HSP90AA1,HSP90AB1,IL17RB,IRF8,ITGA5,KIF5C,KLF10,KLF4,LFNG,LNX2,LRRC8A,MCAM,MCL1,MDC1,MICAL2,MUCL3,NRARP,NUP54,PDE4B,PIM1,POLR2A,RABGEF1,RASGEF1B,RNF123,S1PR1,S1PR2,SES…	83
	Cancer,Organismal Injury and Abnormalities	Solid tumor	8.96e-07		0.367	ABTB1,ACRBP,ACTG1,ADAM11,ADAMTS1,AMOTL2,ANKRD63,APOBR,AREG,ARHGAP4,ARID3A,ARID5A,ARL4C,ATF4,ATOSA,B3GNT8,B4GALT3,BBS10,BCL10,BCL11A,BCL2L1,BCL6B,BDNF,BTBD3,C14orf119,C1orf116,C3AR1,CADPS2,CCDC117,CCDC88B,CCDC88C,CCND2,CCNL1,CCR1,CCR5,CD180,CD4,CDR2,CEBPD,CEBPG,CELSR1,CHKA,CHSY1,CITED2,CLDND1,CLEC1A,CLEC9A,CLK1,CLK4,CNN3,COL12A1,CREM,CRKL,CSRNP1,CSRNP2,CTTNBP2NL,CWC22,CX3CR1,CXCL16,CXCL17,CYP1A1,C…	279
	Gene Expression	Transactivation of RNA	2.88e-08		0.366	ABTB1,BDNF,CCND2,CEBPD,CITED2,CREM,CYP1A1,DUSP3,ETS2,FOSL2,GADD45G,HES1,IRF8,JMJD6,KLF13,KLF2,KLF4,KLF5,KLF6,NR4A2,NR4A3,PER1,PIM1,SPIB,SRF,TAB1,TGFB1I1,TRIM16,TSC22D3,YWHAH	30
	Organismal Development	Formation of vessel component	9.71e-05		0.339	CD180,CREM,KLF4,KLF5,NR4A3,PIM1,PTGER4	7
	Cardiovascular System Development and Function,Organismal Development	Formation of neointima	0.000443		0.339	CD180,CREM,KLF4,KLF5,NR4A3,PIM1	6
	Cellular Growth and Proliferation	Colony formation	2.73e-06		0.329	AREG,BCL2L1,BCL6B,CD4,CRKL,EPHA2,ERRFI1,FRMD6,GADD45G,GDNF,HES1,HMGA1,HPGD,IRF8,KLF2,KLF4,KLF6,MCAM,MEX3A,PAK1,PIM1,RASSF1,RCAN1,SERTAD1,SLC40A1,SPIB,SPRY2,SPRY4,TET2,TGFB1I1,TNFRSF10A,TRIT1,ULK1,ZNF217,ZNF507	35
	Cell Death and Survival,Organismal Injury and Abnormalities	Apoptosis of lymphatic system cells	6.69e-07		0.324	BCL10,BCL11A,BCL2L1,C3AR1,CCR5,CD4,CRKL,EFNA1,ETS2,HMGA1,KLF13,KLF2,LRRC8A,MCL1,NR4A3,PIM1,RCAN1,S1PR1,S1PR2,SH3BP2,SPIB,TNFRSF25,TSC22D3	23
	Cell Death and Survival,Organismal Injury and Abnormalities	Apoptosis of hematopoietic progenitor cells	0.000371		0.321	BCL11A,BCL2L1,EFNA1,ETS2,GEM,IRF8,KLF13,KLF2,LRRC8A,SPIB,TNFRSF25,TSC22D3	12
	Cell Death and Survival,Organismal Injury and Abnormalities	Apoptosis of lymphocytes	7.46e-06		0.308	BCL10,BCL11A,BCL2L1,C3AR1,CCR5,CD4,CRKL,EFNA1,ETS2,KLF13,KLF2,LRRC8A,NR4A3,RCAN1,S1PR1,S1PR2,SH3BP2,SPIB,TNFRSF25,TSC22D3	20
	Organismal Survival	Survival of organism	1.92e-06		0.3	AREG,BCL2L1,BDNF,C3AR1,CCND2,CCR1,CCR5,CD4,CXCL16,CXCL17,DUSP3,EPHA2,ETS2,GDNF,HMGA1,ID2,IQGAP2,IRF8,ITGA5,KLF5,KLF6,LFNG,MCL1,Mx1,NR4A2,NR4A3,PIM1,PTGER4,RASSF1,S1PR2,SEC22B,Serpinb6b,SESN2,SIAH2,SLC11A1,SLC40A1,TET2,TNFAIP6,TNFRSF10A,TNFRSF25,TSG101	41
	Cellular Movement	Invasion of cells	9.94e-08		0.288	ADAMTS1,AREG,ARHGAP4,ARID3A,BCL10,BCL11A,BCL2L1,BDNF,CCR1,CCR5,CEBPD,CRKL,CXCL17,CYP1A1,EFNA1,EPHA2,ETS2,FOXF1,GDNF,GEM,HES1,HMGA1,HSP90AA1,HSP90AB1,ID2,IRX1,ITGA5,KLF2,KLF4,KLF5,KLF6,MAPK6,MCAM,MCL1,MEX3A,MICAL2,NEDD9,Nes,NR4A2,NR4A3,OSR1,PAK1,PI4K2B,Pvr,RASSF1,S1PR2,SNIP1,SOCS5,SOX18,SPRY2,SRF,TAB1,TET2,TFAP4,TGFB1I1,TNFAIP6,TRPM2,ZNF217,ZNF503,ZNF507	60
	Cancer,Organismal Injury and Abnormalities	Development of carcinoma	0.000132		0.267	ABTB1,ACTG1,ADAM11,ADAMTS1,AMOTL2,APOBR,AREG,ARHGAP4,ARID3A,ARL4C,ATF4,ATOSA,B3GNT8,B4GALT3,BBS10,BCL10,BCL11A,BCL2L1,BCL6B,BDNF,BTBD3,C14orf119,C1orf116,C3AR1,CADPS2,CCDC117,CCDC88B,CCDC88C,CCND2,CCR1,CD180,CD4,CDR2,CEBPG,CELSR1,CHKA,CHSY1,CLDND1,CLEC1A,CLK1,COL12A1,CREM,CRKL,CSRNP2,CTTNBP2NL,CWC22,CX3CR1,CYP1A1,DENND4B,DNAJA1,DNAJB5,DND1,DSTN,DUSP16,DUSP3,EDARADD,EGFL7,ENPEP,EPC1,EPHA2,ERRFI1,E…	206
	Hematological System Development and Function,Lymphoid Tissue Structure and Development,Tissue Morphology	Quantity of CD8+ T lymphocyte	0.00291		0.266	BCL11A,CCR1,CD4,CXCL16,ID2,IPMK,LRRC8A,MCL1,TRIB2,TXNIP	10
	Cancer,Gastrointestinal Disease,Organismal Injury and Abnormalities	Development of digestive organ tumor	6.26e-05		0.262	ABTB1,ACTG1,ADAM11,ADAMTS1,AMOTL2,APOBR,AREG,ARHGAP4,ARID3A,ATF4,ATOSA,B3GNT8,B4GALT3,BCL10,BCL11A,BCL2L1,BCL6B,BDNF,BTBD3,C1orf116,C3AR1,CADPS2,CCDC117,CCDC88B,CCDC88C,CCND2,CCR1,CD4,CDR2,CELSR1,CHKA,CHSY1,CLDND1,COL12A1,CREM,CSRNP2,CTTNBP2NL,CWC22,CX3CR1,DENND4B,DNAJA1,DND1,DSTN,DUSP16,DUSP3,EGFL7,ENPEP,EPC1,EPHA2,ERRFI1,EXOC8,FASTKD3,FBXO46,FCHO1,FILIP1L,FOXF1,FRMD6,GDNF,GEM,GNB1,HID1,HLX,HMGA…	163
	Cell Death and Survival	Cell death of lymphoid organ	0.00272		0.256	BCL2L1,CD4,EFNA1,ETS2,HMGA1,KLF13,LRRC8A,MCL1,TNFRSF25	9
	Cellular Development,Cellular Growth and Proliferation,Reproductive System Development and Function	Cell proliferation of breast cell lines	0.000214		0.253	AREG,ARHGAP4,CHKA,EPHA2,ERRFI1,ETS2,FRMD6,KLF5,S1PR1,ZNF503	10
	Cancer,Organismal Injury and Abnormalities	Tumorigenesis of epithelial neoplasm	5.54e-05		0.252	ABTB1,ACTG1,ADAM11,ADAMTS1,AMOTL2,APOBR,AREG,ARHGAP4,ARID3A,ARL4C,ATF4,ATOSA,B3GNT8,B4GALT3,BBS10,BCL10,BCL11A,BCL2L1,BCL6B,BDNF,BTBD3,C14orf119,C1orf116,C3AR1,CADPS2,CCDC117,CCDC88B,CCDC88C,CCND2,CCR1,CD180,CD4,CDR2,CEBPD,CEBPG,CELSR1,CHKA,CHSY1,CLDND1,CLEC1A,CLK1,COL12A1,CREM,CRKL,CSRNP2,CTTNBP2NL,CWC22,CX3CR1,CYP1A1,DENND4B,DNAJA1,DNAJB5,DND1,DSTN,DUSP16,DUSP3,EDARADD,EGFL7,ENPEP,EPC1,EPHA2,ER…	210
	Cellular Development	Immortalization	6.39e-07		0.248	ARID3A,BCL2L1,BDNF,CCND2,CITED2,CXCL16,EFNA1,HES1,MCL1,TGFB1I1,ZNF217	11
	Cellular Movement	Cell movement of lymphoma cell lines	0.000437		0.243	C3AR1,CCR1,CCR5,CRKL,CXCL17,S1PR1,S1PR2	7
	Hematological System Development and Function,Lymphoid Tissue Structure and Development,Tissue Morphology	Quantity of lymphocytes	1.69e-10		0.242	ARID3A,ARID5A,BCL10,BCL11A,BCL2L1,BCL6B,BDNF,C3AR1,CCR1,CCR5,CD180,CD4,Ctla2a/Ctla2b,CX3CR1,CXCL16,CXCL17,CYP1A1,EPHA2,ETS2,ID2,IL17RB,IPMK,IRF8,KLF10,KLF13,KLF2,KLF4,LIG4,LRRC8A,MCL1,NEDD9,PIM1,PTGIR,Pvr,S1PR1,S1PR2,SH3BP2,SPIB,SPRY2,SRF,TET2,TNFRSF10A,TNFRSF25,TRIB2,TXNIP,UBL4A	46
	Hematological System Development and Function,Hematopoiesis,Humoral Immune Response,Lymphoid Tissue Structure and Development,Tissue Morphology	Quantity of pre-B lymphocytes	0.000282		0.242	ARID3A,CD180,IRF8,KLF2,KLF4,LRRC8A,PIM1,SH3BP2,TET2	9
	Cancer,Organismal Injury and Abnormalities	Cancer	8.29e-07		0.241	ABTB1,ACRBP,ACTG1,ADAM11,ADAMTS1,AMOTL2,ANKRD63,APOBR,AREG,ARHGAP4,ARID3A,ARID5A,ARL4C,ATF4,ATOSA,B3GNT8,B4GALT3,BBS10,BCL10,BCL11A,BCL2L1,BCL6B,BDNF,BTBD3,C14orf119,C1orf116,C3AR1,CADPS2,CCDC117,CCDC88B,CCDC88C,CCND2,CCNL1,CCR1,CCR5,CD180,CD4,CDR2,CEBPD,CEBPG,CELSR1,CHKA,CHSY1,CITED2,CLDND1,CLEC1A,CLEC9A,CLK1,CLK4,CNN3,COL12A1,CREM,CRKL,CSRNP1,CSRNP2,CTTNBP2NL,CWC22,CX3CR1,CXCL16,CXCL17,CYP1A1,C…	279
	Tissue Development	Growth of epithelial tissue	7.12e-07		0.238	ADAMTS1,AREG,BCL2L1,BDNF,CCND2,CITED2,EFNA1,EGFL7,EPHA2,ERRFI1,FOXF1,GADD45G,HES1,HLX,ID2,KCNJ2,KLF10,KLF2,KLF4,KLF5,MCAM,MCC,NR4A2,NR4A3,NRARP,OSR1,PAK1,PIM1,PPP1R16B,PTGIR,RCAN1,S1PR2,SPRY4,TNFAIP6,TNFRSF12A,TNFRSF25,TSG101	37
	Cancer,Organismal Injury and Abnormalities	Pelvic tumor	7.36e-06		0.232	ABTB1,ACRBP,ACTG1,ADAM11,ADAMTS1,APOBR,ARHGAP4,ARID3A,ARL4C,ATF4,ATOSA,B4GALT3,BBS10,BCL10,BCL11A,BCL2L1,BCL6B,BDNF,BTBD3,C1orf116,C3AR1,CADPS2,CCDC117,CCDC88B,CCDC88C,CCND2,CD180,CDR2,CEBPD,CEBPG,CELSR1,CHKA,CLDND1,CLEC9A,CLK1,CLK4,COL12A1,CREM,CRKL,CSRNP1,CWC22,CXCL16,CYP1A1,DENND4B,DNAJA1,DNAJB5,DND1,DSTN,DUSP16,EFNA1,EGFL7,ENPEP,EPC1,EPHA2,ERLIN1,ERRFI1,ETS2,EXOC8,FASTKD3,FBXO46,FCHO1,FILIP1L…	192
	Cell Death and Survival,Organismal Injury and Abnormalities	Cell death of epithelial cell lines	2.28e-05		0.23	BCL10,BCL2L1,CEBPD,CITED2,DYNLL1,ITGA5,MCL1,NDEL1,NR4A3,PIM1,PPP1R10,RASSF1,SRF,TGFB1I1,TNFRSF10A,TNFRSF25,TRIM32,TRPM2	18
	Cell Death and Survival,Organismal Injury and Abnormalities	Apoptosis of breast cancer cell lines	0.00167		0.229	BCL10,BCL2L1,EPHA2,ERRFI1,ETS2,IL17RB,KLF4,KLF5,MCL1,NEDD9,NR4A3,PIM1,RASSF1,TNFRSF10A,TNFRSF25	15
	Cellular Development,Cellular Growth and Proliferation,Hematological System Development and Function,Humoral Immune Response,Lymphoid Tissue Structure and Development	Proliferation of B lymphocytes	1.01e-05		0.221	BCL10,BCL11A,BCL2L1,CCND2,CD180,CD4,Cmah,IPMK,IRF8,ITGA5,KLF2,KLF4,PIM1,PTGER4,S1PR1,S1PR2,SH3BP2,SPIB	18
	Cancer,Hematological Disease,Immunological Disease,Organismal Injury and Abnormalities	B-cell lymphoma	0.00165		0.218	BCL10,BCL2L1,CCND2,CD180,CLK1,COL12A1,CREM,EPHA2,FILIP1L,GNB1,HSP90AA1,HSP90AB1,ID2,IQGAP2,IRF8,KLF2,LIG4,MCL1,MICAL2,PDE4B,PIM1,RASSF1,RESF1,RNF123,S1PR1,S1PR2,SEC14L1,SIAH2,SNX18,SPIB,TET2,TFAP4,TNFRSF10A,YWHAZ,ZFP36L2	35
	Connective Tissue Disorders,Inflammatory Disease,Inflammatory Response,Organismal Injury and Abnormalities,Skeletal and Muscular Disorders	Polyarthritis	0.00314		0.218	BDNF,CCR1,CD180,MCL1,NR4A2,NR4A3,PTGER4,PTGIR,UBL4A	9
	Cancer,Cellular Development,Cellular Growth and Proliferation,Organismal Injury and Abnormalities,Tumor Morphology	Proliferation of tumor cells	0.00016		0.204	AREG,BCL2L1,CREM,EFNA1,EPHA2,GDNF,HES1,HPGD,ID2,MCAM,NEDD9,Nes,NR4A2,PIM1,RASSF1,RCAN1,SPIB,TAX1BP3,TET2,TNFRSF12A,TXNIP,ULK1	22
	Hematological System Development and Function,Inflammatory Response,Tissue Morphology	Quantity of plasmacytoid dendritic cells	0.000184		0.202	BCL11A,ID2,IRF8,MCL1,SPIB	5
	Cardiovascular System Development and Function,Cellular Movement	Movement of vascular endothelial cells	0.000119		0.194	ADAMTS1,BDNF,EFNA1,HLX,HSP90AB1,KLF2,NR4A2,OSR1,RCAN1,S1PR1,S1PR2,SPRY4,TNFRSF25	13
	Cell Death and Survival,Organismal Injury and Abnormalities	Cell death of mononuclear leukocytes	1.74e-07		0.189	BCL10,BCL11A,BCL2L1,C3AR1,CCR5,CD4,CRKL,EFNA1,ETS2,GADD45G,ID2,IRF8,KLF13,KLF2,KLF4,LRRC8A,MCL1,NR4A3,RCAN1,S1PR1,S1PR2,SH3BP2,SPIB,TNFRSF25,TSC22D3	25
	Cell Death and Survival,Organismal Injury and Abnormalities	Apoptosis of blood cells	1.98e-07		0.184	BCL10,BCL11A,BCL2L1,C3AR1,CCR5,CD4,CRKL,EFNA1,ETS2,GADD45G,GEM,HSP90AB1,IL17RB,IRF8,KLF13,KLF2,KLF4,LRRC8A,MCL1,NR4A3,PIM1,PTGER4,RCAN1,S1PR1,S1PR2,SH3BP2,SPIB,TNFRSF25,TSC22D3	29
	Cellular Assembly and Organization,Cellular Function and Maintenance,Organismal Development,Tissue Development	Formation of actin stress fibers	0.00216		0.177	ACTG1,C3AR1,GDNF,GNB1,KLF2,PAK1,PTGER4,S1PR1,S1PR2,SPRY2,SRF,TNFAIP1	12
	Gene Expression	Transactivation	3.28e-08		0.17	ABTB1,BDNF,CCND2,CEBPD,CITED2,CREM,CYP1A1,DUSP3,ETS2,FOSL2,GADD45G,HES1,IRF8,JMJD6,KLF13,KLF2,KLF4,KLF5,KLF6,NR4A2,NR4A3,PER1,PIM1,SIAH2,SPIB,SRF,TAB1,TGFB1I1,TRIM16,TSC22D3,YWHAH	31
	Cardiovascular Disease,Organismal Injury and Abnormalities	Vascular lesion	0.00164		0.169	BDNF,CCR1,CCR5,CD4,CITED2,CX3CR1,CXCL16,KLF2,KLF4,KLF5,LCAT,NR4A3,PIM1,PTGER4,RCAN1	15
	Cellular Movement	Chemotaxis	0.000506		0.16	BDNF,C3AR1,CCR1,CCR5,CD4,CRKL,CX3CR1,CXCL16,CXCL17,DUSP3,EFNA1,EPHA2,GDNF,GNB1,NEDD9,OSR1,PAK1,PDE4B,S1PR1,S1PR2,SRF,TNFAIP6,TRPM2	23
	Cell Cycle	Cell cycle progression	1.04e-06		0.15	ABTB1,ACRBP,AREG,BCL2L1,CCND2,CCNL1,CD4,CITED2,DUSP3,EPC1,ERRFI1,FOSL2,FRMD6,GADD45G,GEM,HES1,HPGD,HSP90AB1,ID2,IRX1,KLF10,KLF4,KLF5,KLF6,NEDD9,NR4A2,NR4A3,PAK1,PER1,PHF13,PIM1,PPP1R10,RASSF1,RPS6KA2,S1PR1,SERTAD1,SH3BP2,SOCS5,SOCS7,SPRY2,SRF,TFAP4,TNFRSF12A,TRIM32,TSG101,TXNIP,USP42	47
	Cellular Development,Cellular Growth and Proliferation,Hematological System Development and Function,Lymphoid Tissue Structure and Development	Proliferation of lymphocytes	8.79e-08		0.149	BCL10,BCL11A,BCL2L1,BCL6B,CCDC88B,CCND2,CCR5,CD180,CD4,Cmah,EFNA1,EPHA2,ETS2,HES1,HMGA1,Hoxaas2,ID2,IPMK,IRF8,ITGA5,KLF2,KLF4,LRRC8A,PIM1,PTGER4,RCAN1,RGS2,S1PR1,S1PR2,SH3BP2,SPIB,SPRY2,SRF,TNFRSF10A,TNFRSF25,TRPM2,TSC22D3,TSPAN32,TXNIP	39
	Cell Death and Survival	Cell death of progenitor cells	4.52e-06		0.149	BCL11A,BCL2L1,EFNA1,ETS2,GDNF,GEM,HES1,ID2,IRF8,KLF13,KLF2,KLF4,LRRC8A,MCL1,SPIB,TNFRSF25,TSC22D3	17
	Cell Cycle	Ploidy of cells	0.00204		0.146	CCR5,CEBPD,CLK1,MDC1,PIM1,SPRY2,TSG101,YWHAH	8
	Cell-To-Cell Signaling and Interaction,Hematological System Development and Function	Binding of T lymphocytes	0.000336		0.137	CCR1,Cmah,HSP90AA1,HSP90AB1,ITGA5,JMJD6,LFNG,MCAM,MYADM	9
	Tissue Morphology	Quantity of cells	2.99e-13		0.131	ADAMTS1,ARID3A,ARID5A,ATF4,BBS10,BCL10,BCL11A,BCL2L1,BCL6B,BDNF,C3AR1,CADPS2,CCND2,CCR1,CCR5,CD180,CD4,CEBPG,CITED2,CREM,Ctla2a/Ctla2b,CX3CR1,CXCL16,CXCL17,CYP1A1,CYTH2,DUSP3,DYNLL1,EPHA2,ERRFI1,ETS2,EXOC8,FOSL2,FOXF1,GDNF,HES1,HMGA1,ID2,IL17RB,IPMK,IQGAP2,IRF8,KIF5C,KLF10,KLF13,KLF2,KLF4,KLF5,KLF6,LCAT,LFNG,LIG4,LRRC8A,MAFK,MCL1,NDEL1,NEDD9,Nes,NR4A2,NR4A3,PAK1,PDE4B,PER1,PIM1,PTGIR,Pvr,RAB3A,RA…	92
	Cellular Development,Cellular Growth and Proliferation	Colony formation of breast cancer cell lines	0.00238		0.128	BCL2L1,ERRFI1,FRMD6,GDNF,HPGD,MCAM,PAK1	7
	Cell Death and Survival,Organismal Injury and Abnormalities	Apoptosis of mononuclear leukocytes	2.98e-07		0.108	BCL10,BCL11A,BCL2L1,C3AR1,CCR5,CD4,CRKL,EFNA1,ETS2,GADD45G,IRF8,KLF13,KLF2,KLF4,LRRC8A,NR4A3,RCAN1,S1PR1,S1PR2,SH3BP2,SPIB,TNFRSF25,TSC22D3	23
	Connective Tissue Development and Function,Hematological System Development and Function,Hematopoiesis,Organismal Development,Tissue Morphology	Quantity of red blood cells	0.00084		0.104	BCL6B,CCND2,KLF13,KLF2,MAFK,MCL1,PIM1,SLC40A1,ZFP36L2	9
	Cellular Development,Cellular Growth and Proliferation,Hair and Skin Development and Function,Organ Development,Tissue Development	Proliferation of epidermal cells	0.00159		0.104	AREG,BDNF,EFNA1,EPHA2,ID2,KLF10,KLF4,KLF5,PAK1,TSG101	10
	Cellular Movement	Homing of cells	0.000453		0.099	BDNF,C3AR1,CCR1,CCR5,CD4,CRKL,CX3CR1,CXCL16,CXCL17,DUSP3,EFNA1,EPHA2,GDNF,GNB1,ITGA5,NEDD9,OSR1,PAK1,PDE4B,S1PR1,S1PR2,SRF,TNFAIP6,TRPM2	24
	Cell Death and Survival,Organismal Injury and Abnormalities	Cell death of breast cancer cell lines	0.000192		0.097	BCL10,BCL2L1,CCND2,EPHA2,ERRFI1,ETS2,FRMD6,HSP90AA1,HSP90AB1,IL17RB,KLF4,KLF5,MCL1,NEDD9,NR4A3,PIM1,RASSF1,TNFRSF10A,TNFRSF25	19
	Hematological System Development and Function,Tissue Morphology	Quantity of leukocytes	2.66e-11		0.094	ARID3A,ARID5A,BCL10,BCL11A,BCL2L1,BCL6B,BDNF,C3AR1,CCR1,CCR5,CD180,CD4,CEBPG,Ctla2a/Ctla2b,CX3CR1,CXCL16,CXCL17,CYP1A1,CYTH2,DUSP3,EPHA2,ETS2,FOSL2,ID2,IL17RB,IPMK,IRF8,KLF10,KLF13,KLF2,KLF4,KLF5,KLF6,LIG4,LRRC8A,MCL1,NEDD9,PDE4B,PIM1,PTGIR,Pvr,RABGEF1,RPS6KA2,S1PR1,S1PR2,SH3BP2,SPIB,SPRY2,SRF,TET2,TNFRSF10A,TNFRSF25,TRIB2,TXNIP,UBL4A,ZFP36L2	56
	Cell Death and Survival,Organismal Injury and Abnormalities	Cell death of hematopoietic cells	3.29e-05		0.085	BCL11A,BCL2L1,EFNA1,ETS2,GEM,IRF8,KLF13,KLF2,KLF4,LRRC8A,MCL1,PIM1,SPIB,TNFRSF25,TSC22D3	15
	Hematological System Development and Function,Tissue Morphology	Quantity of blood cells	2.53e-13		0.082	ARID3A,ARID5A,ATF4,BCL10,BCL11A,BCL2L1,BCL6B,BDNF,C3AR1,CCND2,CCR1,CCR5,CD180,CD4,CEBPG,Ctla2a/Ctla2b,CX3CR1,CXCL16,CXCL17,CYP1A1,CYTH2,DUSP3,EPHA2,ETS2,FOSL2,ID2,IL17RB,IPMK,IRF8,KLF10,KLF13,KLF2,KLF4,KLF5,KLF6,LCAT,LIG4,LRRC8A,MAFK,MCL1,NEDD9,PDE4B,PIM1,PTGIR,Pvr,RABGEF1,RCAN1,RPS6KA2,S1PR1,S1PR2,SH3BP2,SLC40A1,SPIB,SPRY2,SRF,TET2,TNFRSF10A,TNFRSF25,TRIB2,TSC22D3,TXNIP,UBL4A,ULK1,ZFP36L2	64
	Connective Tissue Disorders,Inflammatory Disease,Inflammatory Response,Organismal Injury and Abnormalities,Skeletal and Muscular Disorders	Experimentally-induced arthritis	0.00012		0.059	BDNF,CCR1,CCR5,CD180,MCL1,PTGER4,PTGIR,SLC11A1,TNFAIP6,UBL4A,YWHAZ	11
	Cellular Development,Cellular Growth and Proliferation	Cell proliferation of breast cancer cell lines	3.74e-05		0.058	ADAMTS1,AMOTL2,BCL2L1,CCND2,CEBPD,CHKA,EPHA2,ERRFI1,ETS2,FRMD6,HES1,HMGA1,HPGD,ID2,ITGA5,KLF4,KLF5,MAPK6,MCL1,NR4A3,OSGIN1,PAK1,PIM1,RASSF1,SIAH2,SNIP1,ZNF131,ZNF503	28
	Cellular Development,Cellular Growth and Proliferation	Proliferation of prostate cancer cell lines	0.00037		0.052	BCL2L1,CEBPD,CREM,DYNLL1,ETS2,GADD45G,ID2,IQGAP2,KLF4,KLF5,NR4A2,PIM1,PPP1R10,RASSF1,SIAH2,SRF,TGFB1I1,ZNF507	18
	Cell Death and Survival,Hematological System Development and Function	Cell viability of leukocyte cell lines	0.000848		0.031	BCL2L1,IRF8,LIG4,MCL1,PIM1,YWHAZ	6
	Cell Death and Survival,Organismal Injury and Abnormalities	Cell death of leukemia cell lines	5.74e-05		0.014	BCL2L1,CCR5,CD4,CEBPD,CHKA,CREM,GADD45G,HES1,HMGA1,KLF4,KLF5,MCL1,PAK1,PIM1,RCAN1,SAR1A,TNFRSF25,TRIB2,TSC22D3	19
	Cancer,Gastrointestinal Disease,Organismal Injury and Abnormalities	Gastrointestinal tract cancer	9.36e-07		0	ABTB1,ACRBP,ACTG1,ADAM11,ADAMTS1,AMOTL2,APOBR,AREG,ARHGAP4,ARID3A,ARID5A,ARL4C,ATF4,ATOSA,B3GNT8,B4GALT3,BCL10,BCL11A,BCL2L1,BCL6B,BDNF,BTBD3,C1orf116,C3AR1,CADPS2,CCDC117,CCDC88B,CCDC88C,CCND2,CCNL1,CCR1,CCR5,CD180,CD4,CDR2,CEBPD,CELSR1,CHKA,CHSY1,CITED2,CLDND1,CLEC1A,CLK4,COL12A1,CREM,CSRNP2,CTTNBP2NL,CWC22,CX3CR1,CYP1A1,CYTH2,DENND4B,DNAJA1,DNAJB5,DND1,DSTN,DUSP16,DUSP3,DUSP8,EGFL7,ENPEP,ENTR1…	233
	Cellular Compromise	Retraction of cells	9.95e-05		0	BCL2L1,CRKL,EPHA2,PAK1,PLEKHF2	5
	Cellular Development,Cellular Growth and Proliferation	Development of lung cancer cell lines	0.000357		0	CRKL,GADD45G,KLF4,KLF6,RASSF1,TRIT1	6
	Cell Cycle	G1 phase	0.000464		0	BCL2L1,CCND2,CD180,CEBPD,CREM,CRKL,GADD45G,HES1,HMGA1,ID2,ITGA5,KLF10,KLF4,KLF6,PIM1,Pvr,RASSF1,SPRY2,TOB2,TSG101,TXNIP	21
	Cancer,Organismal Injury and Abnormalities,Reproductive System Disease	Mammary tumor	0.00231		0	ADAM11,ADAMTS1,AMOTL2,APOBR,AREG,ARL4C,B4GALT3,BCL11A,BCL2L1,C3AR1,CADPS2,CCND2,CCNL1,CCR5,CD4,CEBPD,CLK1,CLK4,COL12A1,CRKL,CX3CR1,CYP1A1,DENND4B,DND1,DUSP16,EPHA2,ETS2,FBXO28,FILIP1L,FOSL2,HES1,HSP90AA1,HSP90AB1,IL17RB,IPMK,IQGAP2,ITGA5,KLF10,KLF4,KLF6,MAPK6,MCAM,MCC,MCL1,MDC1,MICAL2,MTF1,NEDD9,NR4A2,NR4A3,NUP107,OSGIN1,OSR1,PACC1,PAK1,PI4K2B,PIM1,POLR2A,PRR15L,PTGER4,RASSF1,RGS2,RPS6KA2,S1PR1,S…	91
	Cellular Assembly and Organization,Cellular Function and Maintenance,Organismal Development,Tissue Development	Formation of actin filaments	0.00308		0	ACTG1,C3AR1,DSTN,GDNF,GNB1,KLF2,MYADM,PAK1,PTGER4,S1PR1,S1PR2,SPRY2,SRF,TNFAIP1	14
	Cancer,Organismal Injury and Abnormalities	Metastasis	0.000192		-0.012	ADAMTS1,ARID3A,ARL4C,BCL11A,BCL2L1,CCND2,CCR5,CEBPD,CRKL,DNAJA1,EGFL7,EPHA2,FOXF1,HLX,HMGA1,HSP90AA1,HSP90AB1,ID2,IRX1,KCNJ2,KLF4,KLF6,MCAM,MCL1,MDC1,MEX3C,NEDD9,NR4A3,ORAI2,PAK1,RASSF1,S1PR1,SLC40A1,SNIP1,SOX18,TET2,TFAP4,TNFAIP6,TNFRSF10A,TNFRSF12A,TXNIP,YWHAZ,ZFP36L2,ZNF217,ZNF503,ZNF507	46
	Cancer,Organismal Injury and Abnormalities	Invasive cancer	0.000366		-0.012	ADAMTS1,AREG,ARID3A,ARL4C,BCL11A,BCL2L1,CCND2,CCR5,CEBPD,CRKL,CX3CR1,DNAJA1,EGFL7,EPHA2,FOXF1,HLX,HMGA1,HSP90AA1,HSP90AB1,ID2,IRX1,KCNJ2,KLF4,KLF5,KLF6,MCAM,MCL1,MDC1,MEX3C,NEDD9,NR4A2,NR4A3,ORAI2,OSR1,PAK1,PI4K2B,RASSF1,S1PR1,SLC40A1,SNIP1,SOX18,TET2,TFAP4,TNFAIP6,TNFRSF10A,TNFRSF12A,TXNIP,USP42,YWHAZ,ZFP36L2,ZNF217,ZNF503,ZNF507,ZNF717	54
	Cellular Development,Cellular Growth and Proliferation	Proliferation of blood cells	8.42e-09		-0.023	BCL10,BCL11A,BCL2L1,BCL6B,CCDC88B,CCND2,CCR5,CD180,CD4,Cmah,CXCL16,EFNA1,EPHA2,ETS2,HES1,HMGA1,Hoxaas2,ID2,IPMK,IRF8,ITGA5,KLF2,KLF4,LRRC8A,NR4A3,PIM1,PTGER4,RABGEF1,RCAN1,RGS2,S1PR1,S1PR2,SH3BP2,SLC40A1,SOX18,SPIB,SPRY2,SRF,TET2,TNFRSF10A,TNFRSF12A,TNFRSF25,TRPM2,TSC22D3,TSPAN32,TXNIP	46
	Free Radical Scavenging	Production of reactive oxygen species	0.00153		-0.037	BCL2L1,CCR5,CYP1A1,HSP90AA1,HSP90AB1,ITGA5,KLF4,LCAT,NR4A3,ORAI2,PAK1,PIM1,PTGER4,SESN2,SLC40A1,TRPM2,TXNIP,YWHAZ	18
	Cell-To-Cell Signaling and Interaction,Hematological System Development and Function	Interaction of lymphocytes	5.05e-05		-0.044	CCR1,CCR5,CD4,Cmah,HSP90AA1,HSP90AB1,ITGA5,JMJD6,LFNG,MCAM,MYADM,NEDD9	12
	Cellular Development,Cellular Growth and Proliferation	Proliferation of leukemia cell lines	0.000282		-0.055	BCL2L1,CREM,FOSL2,HES1,HMGA1,IL17RB,IRF8,KLF2,PI4K2B,PIM1,SAR1A,SEC22B,SLC40A1,TXNIP,ULK1	15
	Cell-To-Cell Signaling and Interaction,Cellular Movement,Hematological System Development and Function,Immune Cell Trafficking	Recruitment of lymphocytes	0.00145		-0.059	CCR1,CCR5,CD4,CX3CR1,CXCL16,S1PR1,S1PR2	7
	Cell Death and Survival,Organismal Injury and Abnormalities	Cell death of dendritic cells	0.00127		-0.068	BCL2L1,C3AR1,HSP90AB1,NR4A3,PTGER4,SESN2	6
	Cellular Response to Therapeutics	Sensitivity of cells	0.00256		-0.073	BCL11A,BCL2L1,C3AR1,ERRFI1,ETS2,GADD45G,KCTD10,KLF5,LIG4,MCC,MCL1,MEX3A,MTF1,PCGF3,PDCD11,PPP2CB,SEC14L1,SESN2,TFAP4,TNFRSF10A,TRPM2,WSB2	22
	Gene Expression	Repression of RNA	0.00128		-0.074	BCL11A,BCL6B,HES1,KLF10,KLF13,L3MBTL2,NR4A2,PAK1,TFAP4	9
	Cancer,Organismal Injury and Abnormalities	Neoplasia of cells	4.39e-06		-0.09	ABTB1,ACTG1,ADAMTS1,APOBR,AREG,ARHGAP4,ARID3A,ATF4,B4GALT3,BBS10,BCL10,BCL11A,BCL2L1,BCL6B,BDNF,C1orf116,CADPS2,CCDC88B,CCDC88C,CCND2,CCNL1,CCR5,CD180,CD4,CDR2,CEBPD,CEBPG,CELSR1,CHSY1,CITED2,CLEC1A,CLK1,CLK4,COL12A1,CREM,CRKL,CSRNP1,CX3CR1,CXCL16,CYP1A1,DENND4B,DNAJA1,DNAJB5,DUSP16,DUSP8,DYNLL1,EGFL7,ENPEP,EPC1,EPHA2,FILIP1L,FOSL2,FOXF1,FRMD6,GADD45G,GEM,GNB1,HES1,HLX,HMGA1,HSP90AA1,HSP90AB1,ID2…	166
	Cancer,Organismal Injury and Abnormalities	Growth of tumor	5.74e-12		-0.097	ADAMTS1,AMOTL2,AREG,ATF4,BCL2L1,BDNF,C3AR1,CCR1,CCR5,CEBPD,CREM,CRKL,CX3CR1,CXCL16,DNAJA1,EFNA1,EGFL7,EPHA2,FOXF1,FRMD6,GDNF,HES1,HMGA1,HPGD,HSP90AA1,ID2,IQGAP2,IRF8,ITGA5,KLF10,KLF4,KLF5,KLF6,MCAM,MCL1,MEX3A,NEDD9,Nes,NR4A2,NR4A3,PAK1,PIM1,PTGER4,RASSF1,RCAN1,RNF123,S1PR1,S1PR2,SEC22B,SIAH2,SLC40A1,SOCS7,SPIB,SPRY4,TAX1BP3,TET2,TNFRSF10A,TNFRSF12A,TRIB2,TRIM32,TRPM2,TXNIP,ULK1,YWHAZ,ZFP36L2,ZNF2…	68
	Cancer,Gastrointestinal Disease,Organismal Injury and Abnormalities	Gastrointestinal tumor	4.12e-07		-0.102	ABTB1,ACRBP,ACTG1,ADAM11,ADAMTS1,AMOTL2,APOBR,AREG,ARHGAP4,ARID3A,ARID5A,ARL4C,ATF4,ATOSA,B3GNT8,B4GALT3,BCL10,BCL11A,BCL2L1,BCL6B,BDNF,BTBD3,C1orf116,C3AR1,CADPS2,CCDC117,CCDC88B,CCDC88C,CCND2,CCNL1,CCR1,CCR5,CD180,CD4,CDR2,CEBPD,CELSR1,CHKA,CHSY1,CITED2,CLDND1,CLEC1A,CLK4,COL12A1,CREM,CSRNP2,CTTNBP2NL,CWC22,CX3CR1,CYP1A1,CYTH2,DENND4B,DNAJA1,DNAJB5,DND1,DSTN,DUSP16,DUSP3,DUSP8,EGFL7,ENPEP,ENTR1…	235
	Cell-mediated Immune Response,Cellular Development,Cellular Function and Maintenance,Cellular Growth and Proliferation,Embryonic Development,Hematological System Development and Function,Hematopoiesis,Lymphoid Tissue Structure and Development,Organ Development,Organismal Development,Tissue Development	Differentiation of T lymphocytes	3.45e-08		-0.103	AREG,BCL10,BCL11A,C3AR1,CD4,DNAJB1,GADD45G,HLX,HMGA1,HSP90AA1,ID2,IPMK,IRF8,JMJD6,KLF10,KLF4,LFNG,LIG4,LRRC8A,NR4A2,NRARP,PTGER4,S1PR1,SOCS5,SPRY2,TFAP4,ZFP36L2	27
	Cell Death and Survival,Organismal Injury and Abnormalities	Apoptosis of leukemia cell lines	1.21e-05		-0.116	BCL2L1,CCR5,CD4,CEBPD,CHKA,CREM,GADD45G,HES1,HMGA1,KLF4,KLF5,MCL1,PAK1,PIM1,SAR1A,TNFRSF25,TRIB2,TSC22D3	18
	Immunological Disease,Organismal Injury and Abnormalities	Hypersensitive reaction	5.98e-05		-0.122	BCL10,BCL2L1,BDNF,C3AR1,CCR1,CCR5,CD4,CNN3,CX3CR1,CYTH2,GADD45G,IL17RB,MCAM,MCL1,NR4A2,PDE4B,PER1,PTGER4,PTGIR,Pvr,SPRY2,TSC22D3	22
	Cell Death and Survival,Organismal Injury and Abnormalities	Cell death of hematopoietic progenitor cells	8.28e-05		-0.137	BCL11A,BCL2L1,EFNA1,ETS2,GEM,IRF8,KLF13,KLF2,KLF4,LRRC8A,MCL1,SPIB,TNFRSF25,TSC22D3	14
	Cell Death and Survival	Cell death of hematopoietic cell lines	2.31e-06		-0.148	ATF4,BCL2L1,CCND2,CCR5,HES1,HMGA1,IRF8,ITGA5,MCL1,PIM1,Serpinb6b,SH3BP2,TRIB2,TRPM2,TSC22D3	15
	Cell Cycle,Gene Expression	Binding of protein binding site	0.00226		-0.148	CD4,CEBPD,ETS2,HMGA1,ID2,KLF13,KLF5,PAK1,PER1,SLC11A1,SRF,TFAP4	12
	Cancer,Organismal Injury and Abnormalities	Breast or colorectal cancer	9.72e-05		-0.152	ABTB1,ACTG1,ADAM11,ADAMTS1,AMOTL2,APOBR,AREG,ARHGAP4,ARL4C,ATF4,ATOSA,B3GNT8,B4GALT3,BCL10,BCL11A,BCL2L1,BCL6B,BDNF,BTBD3,C1orf116,C3AR1,CADPS2,CCDC117,CCDC88B,CCDC88C,CCND2,CCNL1,CCR1,CCR5,CD4,CEBPD,CELSR1,CHSY1,CLDND1,CLK1,CLK4,COL12A1,CRKL,CSRNP2,CTTNBP2NL,CWC22,CX3CR1,CYP1A1,DENND4B,DNAJA1,DND1,DSTN,DUSP16,DUSP3,EGFL7,EPC1,EPHA2,ETS2,EXOC8,FASTKD3,FBXO28,FBXO46,FCHO1,FILIP1L,FOSL2,FOXF1,GDNF,…	172
	Cellular Development,Embryonic Development,Organismal Development,Tissue Development	Differentiation of ectoderm	0.000207		-0.152	BDNF,CITED2,GDNF,ID2,SRF,TET2	6
	Cell Death and Survival	Apoptosis of hematopoietic cell lines	7.66e-06		-0.164	ATF4,BCL2L1,CCND2,CCR5,HES1,HMGA1,IRF8,ITGA5,MCL1,PIM1,SH3BP2,TRIB2,TSC22D3	13
	Cellular Development,Cellular Growth and Proliferation,Hair and Skin Development and Function,Organ Development,Tissue Development	Proliferation of dermal cells	0.000758		-0.199	AREG,BDNF,EFNA1,EPHA2,ID2,KLF10,KLF4,KLF5,PAK1,PIM1,TSG101	11
	Humoral Immune Response,Protein Synthesis	Quantity of IgG	0.000254		-0.201	ARID3A,BCL10,C3AR1,CCR1,CCR5,CD180,Cmah,LRRC8A,Pvr,RCAN1,SH3BP2,SPIB	12
	Cellular Development,Cellular Growth and Proliferation	Proliferation of stem cells	0.000744		-0.213	BDNF,CCND2,CEBPD,HES1,HMGA1,KLF4,KLF5,L3MBTL2,LIG4,PIM1,S1PR1,S1PR2,SOX18,TXNIP	14
	Cellular Growth and Proliferation,Connective Tissue Development and Function,Tissue Development	Proliferation of connective tissue cells	1.24e-05		-0.216	AREG,ARID3A,ATF4,BCL2L1,BDNF,CCND2,CITED2,CRKL,EFNA1,EPHA2,ERRFI1,FOSL2,FRMD6,GEM,ID2,ITGA5,KLF10,KLF4,KLF5,LIG4,PIM1,RIOX1,S1PR2,SERTAD1,SPRY2,TGFB1I1,TNFRSF10A,TNFRSF12A,TSG101,TXNIP	30
	Cellular Development,Cellular Growth and Proliferation,Connective Tissue Development and Function,Hair and Skin Development and Function,Organ Development,Tissue Development	Proliferation of keratinocytes	0.00297		-0.219	AREG,BDNF,EFNA1,EPHA2,ID2,KLF10,KLF4,KLF5,TSG101	9
	Cell Cycle	Senescence of cells	3.31e-05		-0.231	ARID3A,ATF4,BCL11A,BCL2L1,FBXO46,HLX,HMGA1,HSP90AA1,HSP90AB1,ID2,IRF8,KLF4,KLF6,MCL1,PAK1,RASSF1,SPRY4,SRF,TAB1,TRIM16	20
	Cardiovascular Disease,Neurological Disease,Organismal Injury and Abnormalities,Skeletal and Muscular Disorders	Cardiomyopathy	0.0031		-0.238	ADAMTS1,ARID3A,BCL2L1,CHSY1,COL12A1,CREM,CXCL16,GNB1,HSP90AA1,HSP90AB1,ITGA5,JMJD6,KCNJ2,KCTD10,KLF10,KLF5,LCAT,MCL1,MYL12B,PDE4B,PIM1,PPP1R10,PTGER4,PTGIR,RASSF1,RCAN1,RNF123,RPS6KA2,S1PR2,SEC22B,SESN2,TAB1,TAX1BP3,TMOD2,TXNIP,YWHAZ	36
	Hematological System Development and Function,Humoral Immune Response,Lymphoid Tissue Structure and Development,Tissue Morphology	Quantity of follicular B lymphocytes	4.64e-05		-0.243	ARID3A,BCL10,CD180,IRF8,KLF2,LRRC8A,NEDD9,S1PR2,SH3BP2,SPIB,TET2	11
	Organismal Injury and Abnormalities,Respiratory Disease	Acute respiratory disorder	0.00148		-0.243	ARL4C,C3AR1,CCR5,CD180,CEBPD,CEBPG,HLX,IRF8,MAPK6,PDE4B,PTGER4,PTGIR,S1PR1,TNFAIP6,ZFP36L2	15
	Infectious Diseases,Organismal Injury and Abnormalities	Infection by HIV-1	0.00297		-0.246	ABTB1,ARID5A,BCL11A,CCR5,CD4,CLDND1,DNAJB1,DUSP16,ETS2,HES1,HID1,KLF2,LNX2,NUP107,PAK1,POLR2A,SEC14L1,SP110,TFAP4,TSG101,ZNF831	21
	Cellular Growth and Proliferation,Lymphoid Tissue Structure and Development	Proliferation of lymphatic system cells	2.54e-08		-0.251	BCL10,BCL11A,BCL2L1,BCL6B,CCDC88B,CCND2,CCR5,CD180,CD4,Cmah,EFNA1,EPHA2,ETS2,HES1,HMGA1,Hoxaas2,HSP90AB1,ID2,IPMK,IRF8,ITGA5,KLF2,KLF4,LFNG,LRRC8A,NR4A3,PIM1,PTGER4,RCAN1,RGS2,S1PR1,S1PR2,SH3BP2,SPIB,SPRY2,SRF,TNFRSF10A,TNFRSF25,TRPM2,TSC22D3,TSPAN32,TXNIP	42
	Cancer,Organismal Injury and Abnormalities	Growth of solid tumor	3e-05		-0.254	AREG,ATF4,BCL2L1,C3AR1,CRKL,EPHA2,HPGD,ID2,KLF6,MCAM,MCL1,Nes,PAK1,PIM1,PTGER4,RCAN1,RNF123,S1PR1,S1PR2,SIAH2,SLC40A1,SOCS7,TNFRSF10A,TRIM32,TRPM2,TXNIP,ZFP36L2	27
	Cellular Growth and Proliferation,Tissue Development	Proliferation of epithelial cells	3.62e-05		-0.254	AREG,BCL2L1,BDNF,CCND2,CITED2,EFNA1,EPHA2,ERRFI1,FOXF1,GADD45G,HES1,HLX,ID2,KLF10,KLF2,KLF4,KLF5,MCC,NR4A3,OSR1,PAK1,PIM1,S1PR2,TNFAIP6,TNFRSF12A,TSG101	26
	Cellular Development,Connective Tissue Development and Function	Adipogenesis of fibroblast cell lines	0.00157		-0.275	CEBPD,KLF10,KLF6,NR4A2,NR4A3,TGFB1I1	6
	Cell Morphology,Cellular Compromise	Swelling of mitochondria	0.000976		-0.277	BCL2L1,GDNF,HSP90AA1,MCL1	4
	Organ Morphology,Skeletal and Muscular System Development and Function,Tissue Morphology	Quantity of myofiber	0.00134		-0.277	BDNF,CX3CR1,RCAN1,TNFRSF12A	4
	Organismal Injury and Abnormalities,Tissue Morphology	Quantity of lesion	0.00118		-0.282	BDNF,CCR5,CX3CR1,GDNF,HPGD,ID2,KLF5,KLF6,Mx1,NEDD9,RASSF1,S1PR1,TET2,TNFRSF12A	14
	Cancer,Organismal Injury and Abnormalities	Abdominal carcinoma	8.94e-09		-0.287	ABTB1,ACRBP,ACTG1,ADAM11,ADAMTS1,AMOTL2,APOBR,AREG,ARHGAP4,ARID3A,ARID5A,ARL4C,ATF4,ATOSA,B3GNT8,B4GALT3,BBS10,BCL10,BCL11A,BCL2L1,BCL6B,BDNF,BTBD3,C1orf116,C3AR1,CADPS2,CCDC117,CCDC88B,CCDC88C,CCND2,CCNL1,CCR1,CD180,CD4,CDR2,CEBPD,CEBPG,CELSR1,CHKA,CHSY1,CITED2,CLDND1,CLEC1A,CLEC9A,CLK1,CLK4,COL12A1,CREM,CRKL,CSRNP1,CSRNP2,CTTNBP2NL,CWC22,CX3CR1,CXCL16,CXCL17,CYP1A1,CYTH2,DENND4B,DNAJA1,DNAJB5,D…	260
	Cancer	Cell transformation	9.81e-07		-0.298	ABTB1,ACTG1,ADAMTS1,APOBR,AREG,ARHGAP4,ARID3A,ATF4,B4GALT3,BBS10,BCL10,BCL11A,BCL2L1,BCL6B,BDNF,C1orf116,CADPS2,CCDC88B,CCDC88C,CCND2,CCNL1,CCR5,CD180,CD4,CDR2,CEBPD,CEBPG,CELSR1,CHKA,CHSY1,CITED2,CLEC1A,CLK1,CLK4,COL12A1,CREM,CRKL,CSRNP1,CX3CR1,CXCL16,CYP1A1,DENND4B,DNAJA1,DNAJB5,DUSP16,DUSP8,DYNLL1,EGFL7,ENPEP,EPC1,EPHA2,ERRFI1,FILIP1L,FOSL2,FOXF1,FRMD6,GADD45G,GDNF,GEM,GNB1,HES1,HLX,HMGA1,HSP9…	170
	Cellular Development,Cellular Growth and Proliferation,Hematological System Development and Function,Hematopoiesis,Lymphoid Tissue Structure and Development,Tissue Development	Development of phagocytes	0.000305		-0.299	BCL11A,CD4,ETS2,GADD45G,HES1,ID2,IRF8,KLF4,SLC40A1,SPIB,TET2,TRPM2,TSPAN2,ULK1,ZNF831	15
	Cancer,Organismal Injury and Abnormalities	Advanced malignant tumor	3.63e-05		-0.304	ADAMTS1,ARID3A,ARL4C,BCL10,BCL11A,BCL2L1,CCND2,CCR5,CEBPD,CRKL,DNAJA1,EFNA1,EGFL7,ENPEP,EPHA2,FOXF1,HES1,HLX,HMGA1,HSP90AA1,HSP90AB1,ID2,IRF8,IRX1,KCNJ2,KLF4,KLF6,MCAM,MCL1,MDC1,MEX3C,NEDD9,NR4A3,ORAI2,PAK1,RASSF1,S1PR1,SLC40A1,SNIP1,SOX18,TET2,TFAP4,TNFAIP6,TNFRSF10A,TNFRSF12A,TXNIP,YWHAZ,ZFP36L2,ZNF217,ZNF503,ZNF507	51
	Cellular Development,Cellular Growth and Proliferation,Hematological System Development and Function,Hematopoiesis	Proliferation of hematopoietic progenitor cells	8.53e-06		-0.336	BCL11A,BCL2L1,CCND2,ETS2,HMGA1,IRF8,KLF2,KLF4,LRRC8A,NR4A3,PIM1,S1PR1,SOX18,SPIB,TET2,TNFRSF12A,TXNIP	17
	Cell Signaling	Protein kinase cascade	0.000208		-0.362	BCL10,C18orf32,CD4,CRKL,DUSP16,DUSP3,EFNA1,GADD45G,HES1,PAK1,PER1,PTGER4,SH3RF3,SLC11A1,SNIP1,SOCS5,STK40,TAB1,TMED4,TRIM32,ZFP36L2	21
	Humoral Immune Response,Protein Synthesis	Quantity of IgG1	0.00323		-0.378	ARID3A,C3AR1,CCR5,Cmah,Pvr,SH3BP2,SPIB	7
	Cell Death and Survival,Organismal Injury and Abnormalities,Skeletal and Muscular Disorders	Cell death of muscle cells	0.000329		-0.386	BCL2L1,CREM,GNB1,ID2,KLF13,KLF5,MCL1,NR4A3,PIM1,PPP1R10,RASSF1,RPS6KA2,SESN2,TGFB1I1,TNFRSF10A,TSC22D3,TXNIP	17
	Cellular Development,Cellular Growth and Proliferation,Hematological System Development and Function,Hematopoiesis,Lymphoid Tissue Structure and Development,Tissue Development	Differentiation of plasmacytoid dendritic cells	0.00091		-0.391	ID2,IRF8,KLF4,SPIB,ZNF831	5
	Cancer,Organismal Injury and Abnormalities	Cancer of tumor cell lines	0.000231		-0.401	ADAMTS1,BCL11A,CEBPD,EGFL7,EPHA2,FOXF1,HSP90AA1,ID2,IRX1,KLF4,MCAM,NEDD9,ORAI2,S1PR1,SLC40A1,SNIP1,SOX18,TFAP4,TNFAIP6,TXNIP,ZNF217,ZNF503,ZNF507	23
	Connective Tissue Development and Function,Tissue Development	Growth of connective tissue	7.07e-06		-0.428	AREG,ARID3A,ATF4,BCL2L1,BDNF,CCND2,CITED2,CRKL,EFNA1,EPHA2,ERRFI1,FOSL2,FRMD6,GEM,HMGA1,ID2,ITGA5,KLF10,KLF4,KLF5,LIG4,PIM1,RIOX1,S1PR2,SERTAD1,SPRY2,SRF,TGFB1I1,TNFRSF10A,TNFRSF12A,TSG101,TXNIP	32
	Cell Death and Survival,Organismal Injury and Abnormalities	Cell death of T lymphocytes	0.000269		-0.433	BCL10,BCL2L1,C3AR1,CCR5,CD4,EFNA1,ETS2,ID2,KLF13,KLF2,LRRC8A,MCL1,NR4A3,RCAN1,TNFRSF25,TSC22D3	16
	Developmental Disorder,Neurological Disease,Organismal Injury and Abnormalities	Congenital malformation of brain	0.00296		-0.436	ACTG1,BCL10,BCL2L1,CCDC88C,CCND2,CELSR1,CITED2,CNN3,HES1,JMJD6,KIF5C,KLF4,NDEL1,SPRY2,SPRY4,ZNF503	16
	Cancer,Organismal Injury and Abnormalities	Carcinoma	1.06e-07		-0.438	ABTB1,ACRBP,ACTG1,ADAM11,ADAMTS1,AMOTL2,ANKRD63,APOBR,AREG,ARHGAP4,ARID3A,ARID5A,ARL4C,ATF4,ATOSA,B3GNT8,B4GALT3,BBS10,BCL10,BCL11A,BCL2L1,BCL6B,BDNF,BTBD3,C14orf119,C1orf116,C3AR1,CADPS2,CCDC117,CCDC88B,CCDC88C,CCND2,CCNL1,CCR1,CCR5,CD180,CD4,CDR2,CEBPD,CEBPG,CELSR1,CHKA,CHSY1,CITED2,CLDND1,CLEC1A,CLEC9A,CLK1,CLK4,CNN3,COL12A1,CREM,CRKL,CSRNP1,CSRNP2,CTTNBP2NL,CWC22,CX3CR1,CXCL16,CXCL17,CYP1A1,C…	273
	Organ Morphology,Tissue Morphology	Quantity of cochlea cells	0.00109		-0.439	HES1,LFNG,S1PR2,SPRY2	4
	Connective Tissue Development and Function	Adipogenesis	0.00167		-0.44	CEBPD,ID2,KLF10,KLF2,KLF6,NR4A2,NR4A3,SLC25A25,TGFB1I1	9
	Cell Cycle	Interphase	0.000169		-0.444	BCL2L1,CCND2,CD180,CEBPD,CHKA,CREM,CRKL,GADD45G,HES1,HMGA1,ID2,ITGA5,KLF10,KLF4,KLF6,MDC1,PAK1,PIM1,POLR2A,PPP2CB,Pvr,RASSF1,SAR1A,SIAH2,SPRY2,TFAP4,TOB2,TSC22D3,TSG101,TXNIP,ZNF507	31
	Cellular Movement	Invasion of prostate cancer cell lines	0.00012		-0.445	ARHGAP4,BDNF,EPHA2,ETS2,ID2,KLF4,Nes,NR4A2,NR4A3,SPRY2,ZNF507	11
	Cancer,Gastrointestinal Disease,Organismal Injury and Abnormalities	Large intestine neoplasm	2.02e-06		-0.447	ABTB1,ACRBP,ACTG1,ADAM11,ADAMTS1,AMOTL2,APOBR,AREG,ARHGAP4,ARID3A,ARID5A,ARL4C,ATF4,ATOSA,B3GNT8,B4GALT3,BCL10,BCL11A,BCL2L1,BCL6B,BDNF,BTBD3,C1orf116,C3AR1,CADPS2,CCDC117,CCDC88B,CCDC88C,CCND2,CCNL1,CCR1,CCR5,CD180,CD4,CEBPD,CELSR1,CHKA,CHSY1,CITED2,CLDND1,CLEC1A,CLK4,COL12A1,CREM,CSRNP2,CTTNBP2NL,CWC22,CX3CR1,CYP1A1,CYTH2,DENND4B,DNAJA1,DND1,DSTN,DUSP16,DUSP3,DUSP8,EGFL7,ENPEP,EPC1,EPHA2,ERLIN1…	220
	Cellular Development,Cellular Growth and Proliferation,Hematological System Development and Function,Hematopoiesis,Lymphoid Tissue Structure and Development,Tissue Development	Differentiation of subtype 1 conventional dendritic cells	0.000206		-0.447	ID2,IRF8,KLF4,SPIB,ZNF831	5
	Cancer,Gastrointestinal Disease,Organismal Injury and Abnormalities	Colorectal tumor	0.000951		-0.447	ABTB1,ACTG1,ADAM11,ADAMTS1,AMOTL2,APOBR,AREG,ARHGAP4,ARL4C,ATF4,ATOSA,B3GNT8,B4GALT3,BCL10,BCL11A,BCL2L1,BCL6B,BDNF,BTBD3,C1orf116,C3AR1,CADPS2,CCDC117,CCDC88B,CCDC88C,CCND2,CCR1,CCR5,CD4,CEBPD,CELSR1,CHSY1,CLDND1,CLK4,COL12A1,CSRNP2,CTTNBP2NL,CWC22,CX3CR1,DENND4B,DNAJA1,DND1,DSTN,DUSP16,DUSP3,EGFL7,EPC1,EPHA2,EXOC8,FASTKD3,FBXO46,FCHO1,FILIP1L,FOXF1,GDNF,GNB1,HES1,HID1,HLX,HMGA1,HPGD,HSP90AA1,HS…	142
	Cellular Development,Cellular Growth and Proliferation,Hematological System Development and Function,Hematopoiesis,Lymphoid Tissue Structure and Development,Tissue Development	Hematopoiesis of phagocytes	0.000954		-0.458	BCL11A,CD4,ETS2,GADD45G,ID2,IRF8,KLF4,SPIB,TET2,TRPM2,ULK1,ZNF831	12
	Cell-To-Cell Signaling and Interaction,Cellular Movement	Recruitment of blood cells	0.000112		-0.47	BDNF,C3AR1,CCR1,CCR5,CD4,CITED2,CX3CR1,CXCL16,CYP1A1,FOSL2,IL17RB,PDE4B,RCAN1,S1PR1,S1PR2,SPATA2,TNFRSF10A,TRPM2	18
	Cancer,Organismal Injury and Abnormalities	Epithelial neoplasm	6.34e-08		-0.496	ABTB1,ACRBP,ACTG1,ADAM11,ADAMTS1,AMOTL2,ANKRD63,APOBR,AREG,ARHGAP4,ARID3A,ARID5A,ARL4C,ATF4,ATOSA,B3GNT8,B4GALT3,BBS10,BCL10,BCL11A,BCL2L1,BCL6B,BDNF,BTBD3,C14orf119,C1orf116,C3AR1,CADPS2,CCDC117,CCDC88B,CCDC88C,CCND2,CCNL1,CCR1,CCR5,CD180,CD4,CDR2,CEBPD,CEBPG,CELSR1,CHKA,CHSY1,CITED2,CLDND1,CLEC1A,CLEC9A,CLK1,CLK4,CNN3,COL12A1,CREM,CRKL,CSRNP1,CSRNP2,CTTNBP2NL,CWC22,CX3CR1,CXCL16,CXCL17,CYP1A1,C…	274
	Cellular Compromise,Inflammatory Response	Degranulation of cells	0.000728		-0.506	C3AR1,CCR1,CX3CR1,FOXF1,IL17RB,NR4A3,ORAI2,PAK1,Pvr,RABGEF1,S1PR2,SH3BP2	12
	Cell Death and Survival,Organismal Injury and Abnormalities	Necrosis of epithelial tissue	3.67e-07		-0.509	ADAMTS1,BCL10,BCL2L1,BDNF,CCDC88B,CCR5,CEBPD,CITED2,DYNLL1,EPHA2,FOXF1,ID2,IQGAP2,ITGA5,KLF10,KLF2,KLF4,KLF5,MCAM,MCL1,NDEL1,NR4A3,PAK1,PIM1,PPP1R10,RASSF1,RCAN1,S1PR1,SRF,TGFB1I1,TNFRSF10A,TNFRSF25,TRIM32,TRPM2	34
	Cancer,Organismal Injury and Abnormalities	Malignant genitourinary solid tumor	7.25e-06		-0.509	ABTB1,ACRBP,ACTG1,ADAM11,ADAMTS1,AMOTL2,APOBR,AREG,ARHGAP4,ARID3A,ARL4C,ATF4,ATOSA,B4GALT3,BBS10,BCL10,BCL11A,BCL2L1,BCL6B,BDNF,BTBD3,C1orf116,C3AR1,CADPS2,CCDC117,CCDC88B,CCDC88C,CCND2,CCNL1,CCR1,CCR5,CD180,CD4,CDR2,CEBPD,CEBPG,CELSR1,CHKA,CLDND1,CLEC9A,CLK1,CLK4,COL12A1,CREM,CRKL,CSRNP1,CWC22,CX3CR1,CXCL16,CYP1A1,DENND4B,DNAJA1,DNAJB5,DND1,DSTN,DUSP16,EFNA1,EGFL7,ENPEP,EPC1,EPHA2,ERLIN1,ERRFI1,…	211
	Cell-To-Cell Signaling and Interaction,Hematological System Development and Function	Interaction of T lymphocytes	3.34e-05		-0.511	CCR1,CCR5,CD4,Cmah,HSP90AA1,HSP90AB1,ITGA5,JMJD6,LFNG,MCAM,MYADM	11
	Cancer,Organismal Injury and Abnormalities	Tumorigenesis of tissue	3.95e-08		-0.514	ABTB1,ACRBP,ACTG1,ADAM11,ADAMTS1,AMOTL2,ANKRD63,APOBR,AREG,ARHGAP4,ARID3A,ARID5A,ARL4C,ATF4,ATOSA,B3GNT8,B4GALT3,BBS10,BCL10,BCL11A,BCL2L1,BCL6B,BDNF,BTBD3,C14orf119,C1orf116,C3AR1,CADPS2,CCDC117,CCDC88B,CCDC88C,CCND2,CCNL1,CCR1,CCR5,CD180,CD4,CDR2,CEBPD,CEBPG,CELSR1,CHKA,CHSY1,CITED2,CLDND1,CLEC1A,CLEC9A,CLK1,CLK4,CNN3,COL12A1,CREM,CRKL,CSRNP1,CSRNP2,CTTNBP2NL,CWC22,CX3CR1,CXCL16,CXCL17,CYP1A1,C…	275
	Cell Death and Survival,Organismal Injury and Abnormalities	Necrosis	1.79e-11		-0.528	ADAMTS1,AREG,ARHGAP4,ARL4C,ATF4,BCL10,BCL11A,BCL2L1,BCL6B,BDNF,C3AR1,CADPS2,CCDC88B,CCND2,CCR5,CD4,CEBPD,CELSR1,CHKA,CHSY1,CITED2,CREM,CRKL,CX3CR1,DNAJB1,DUSP8,DYNLL1,EFNA1,EPHA2,ERRFI1,ETS2,FOXF1,FRMD6,GADD45G,GDNF,GEM,GNB1,HES1,HMGA1,HSP90AA1,HSP90AB1,ID2,IL17RB,IPMK,IQGAP2,IRF8,IRX1,ITGA5,JMJD6,KLF10,KLF13,KLF2,KLF4,KLF5,KLF6,KMO,L3MBTL2,LIG4,LRRC8A,MCAM,MCL1,MDC1,MEX3A,MICAL2,MTF1,NDEL1,NEDD9…	113
	Cell Death and Survival,Organismal Injury and Abnormalities	Cell death of phagocytes	0.00295		-0.533	BCL2L1,C3AR1,CCR5,HSP90AB1,IRF8,MCL1,NR4A3,PTGER4,SESN2,SH3BP2,SPATA2	11
	Cell Death and Survival,Organismal Injury and Abnormalities	Cell death of tumor cell lines	9.44e-08		-0.54	AREG,ARHGAP4,ARL4C,ATF4,BCL10,BCL2L1,BCL6B,BDNF,CCND2,CCR5,CD4,CEBPD,CELSR1,CHKA,CHSY1,CREM,DNAJB1,DYNLL1,EPHA2,ERRFI1,ETS2,FRMD6,GADD45G,GDNF,GEM,HES1,HMGA1,HSP90AA1,HSP90AB1,IL17RB,IPMK,IQGAP2,IRF8,IRX1,ITGA5,KLF10,KLF2,KLF4,KLF5,KLF6,MCL1,MDC1,MEX3A,MICAL2,NEDD9,NR4A2,NR4A3,OSGIN1,PAK1,PDE4B,PER1,PIM1,PPP1R10,RASSF1,RCAN1,RIOX1,S1PR2,SAR1A,SESN2,SIAH2,SLC40A1,SPRY2,TNFRSF10A,TNFRSF25,TRIB2,TRI…	72
	Cell Death and Survival,Organismal Injury and Abnormalities	Cell death of cervical cancer cell lines	0.000402		-0.541	ARHGAP4,BCL2L1,CCND2,CCR5,CEBPD,DYNLL1,GADD45G,MCL1,NEDD9,NR4A2,NR4A3,PAK1,PPP1R10,RASSF1,RIOX1,TNFRSF10A,TRIM32,YWHAH	18
	Cell Death and Survival,Organismal Injury and Abnormalities	Cell death of fibroblast cell lines	0.00197		-0.553	ATF4,BCL2L1,ID2,KLF6,L3MBTL2,MCL1,MTF1,NR4A2,PAK1,PIM1,PLEKHF1,Pvr,SPATA2,TNFRSF25,TSG101,TXNIP,YWHAZ	17
	Embryonic Development,Organ Development,Organismal Development,Respiratory System Development and Function,Tissue Development	Formation of lung	3.59e-05		-0.555	CEBPG,CITED2,ERRFI1,FOXF1,HES1,HLX,JMJD6,KLF2,LFNG,MAPK6,PTGER4,RAB3A,SPRY2,SPRY4,SRF,STK40,TAB1,YWHAZ	18
	Respiratory System Development and Function	Respiratory system development	5.88e-05		-0.555	CEBPG,CITED2,CRKL,ERRFI1,FOXF1,HES1,HLX,JMJD6,KLF2,LFNG,MAPK6,PTGER4,RAB3A,SPRY2,SPRY4,SRF,STK40,TAB1,YWHAZ	19
	Hematological System Development and Function,Hematopoiesis,Humoral Immune Response,Lymphoid Tissue Structure and Development,Tissue Morphology	Quantity of transitional B lymphocytes	0.000349		-0.555	ARID3A,CD180,KLF2,LRRC8A,SH3BP2	5
	Cancer,Organismal Injury and Abnormalities	Metastasis of tumor cell lines	0.000527		-0.596	ADAMTS1,BCL11A,CEBPD,EGFL7,EPHA2,HSP90AA1,ID2,IRX1,KLF4,MCAM,NEDD9,ORAI2,S1PR1,SLC40A1,SNIP1,SOX18,TFAP4,TNFAIP6,TXNIP,ZNF217,ZNF503,ZNF507	22
	Cellular Development,Embryonic Development	Differentiation of embryonic cell lines	0.00267		-0.596	ARID5A,HMGA1,HSP90AA1,KLF4,PIM1,STK40,TET2,TRIB2	8
	Humoral Immune Response,Protein Synthesis	Quantity of immunoglobulin	0.000129		-0.614	ARID3A,BCL10,C3AR1,CCR1,CCR5,CD180,Cmah,IL17RB,IRF8,LRRC8A,Pvr,RABGEF1,RCAN1,SH3BP2,SPIB	15
	Cell-To-Cell Signaling and Interaction,Cellular Movement,Hematological System Development and Function,Immune Cell Trafficking,Inflammatory Response	Recruitment of neutrophils	0.000163		-0.635	C3AR1,CCR1,CITED2,CX3CR1,CYP1A1,FOSL2,IL17RB,PDE4B,RCAN1,S1PR1,SPATA2,TRPM2	12
	Inflammatory Response,Organismal Injury and Abnormalities	Inflammation of absolute anatomical region	0.00176		-0.637	ADAMTS1,AREG,ARID5A,ATF4,BCL2L1,BDNF,C3AR1,CCR1,CCR5,CD180,CD4,CEBPG,CHSY1,Ctla2a/Ctla2b,CX3CR1,CXCL16,CYP1A1,DYNLL1,EPHA2,ERRFI1,GBP6,GDNF,HES1,HPGD,ID2,IL17RB,ITGA5,KLF13,KLF2,KLF4,KLF5,KMO,MCL1,MDC1,MUCL3,Mx1,NR4A2,NR4A3,PDE4B,PER1,PIM1,PTGER4,PTGIR,RASSF1,S1PR1,S1PR2,SLC11A1,SOX18,SPRY2,TET2,TNFAIP6,TNFRSF10A,TNFRSF12A,TNFRSF25,TRPM2,TSG101,TSPAN2,UBL4A,YWHAZ	59
	Cell Death and Survival	Apoptosis	1.11e-11		-0.645	ADAMTS1,AREG,ARHGAP4,ATF4,BBS10,BCL10,BCL11A,BCL2L1,BCL6B,BDNF,C3AR1,CCDC88B,CCND2,CCR5,CD4,CEBPD,CHKA,CITED2,CREM,CRKL,CSRNP1,DNAJA1,DNAJB1,DYNLL1,EFNA1,EPC1,EPHA2,ERRFI1,ETS2,FOXF1,GADD45G,GDNF,GEM,GNB1,HES1,HMGA1,HPGD,HSP90AA1,HSP90AB1,ID2,IL17RB,IQGAP2,IRF8,IRX1,ITGA5,KLF10,KLF13,KLF2,KLF4,KLF5,KLF6,KMO,L3MBTL2,LIG4,LRRC8A,MCAM,MCL1,MDC1,MEX3A,MTF1,NDEL1,NEDD9,Nes,NR4A2,NR4A3,OSGIN1,OSR1,PAK1…	111
	Cancer,Organismal Injury and Abnormalities	Neoplasia of melanoma cell lines	0.000308		-0.647	EPHA2,HSP90AA1,IL17RB,RASSF1,S1PR1,SERTAD1,SLC40A1,TXNIP,UBL4A	9
	Cell Death and Survival,Organismal Injury and Abnormalities	Apoptosis of T lymphocytes	0.000598		-0.648	BCL10,BCL2L1,C3AR1,CCR5,CD4,EFNA1,ETS2,KLF13,KLF2,LRRC8A,NR4A3,RCAN1,TNFRSF25,TSC22D3	14
	Cell-To-Cell Signaling and Interaction,Cellular Movement	Recruitment of cells	0.000102		-0.663	BDNF,C3AR1,CCR1,CCR5,CD4,CITED2,CX3CR1,CXCL16,CYP1A1,FOSL2,IL17RB,PDE4B,RCAN1,S1PR1,S1PR2,SLC11A1,SPATA2,TNFRSF10A,TRPM2	19
	Cancer,Organismal Injury and Abnormalities	Neoplasia of tumor cell lines	2.21e-07		-0.687	ADAMTS1,AREG,BCL11A,BCL6B,CEBPD,EGFL7,EPHA2,FOXF1,HSP90AA1,ID2,IL17RB,IRX1,KLF4,KLF6,LRRC8A,MCAM,NEDD9,ORAI2,PIM1,RASSF1,S1PR1,SERTAD1,SLC40A1,SNIP1,SNRK,SOX18,SPRY2,TFAP4,TNFAIP6,TRPM2,TXNIP,UBL4A,ZNF217,ZNF503,ZNF507	35
	Cellular Development	Differentiation of stem cell lines	7.35e-05		-0.695	ARID5A,CSRNP1,FOSL2,HMGA1,ID2,KLF4,PIM1,TET2,YWHAH	9
	Cell-To-Cell Signaling and Interaction,Cellular Movement,Hematological System Development and Function,Immune Cell Trafficking	Recruitment of leukocytes	0.000257		-0.7	C3AR1,CCR1,CCR5,CD4,CITED2,CX3CR1,CXCL16,CYP1A1,FOSL2,IL17RB,PDE4B,RCAN1,S1PR1,S1PR2,SPATA2,TNFRSF10A,TRPM2	17
	Cellular Development,Cellular Growth and Proliferation,Connective Tissue Development and Function,Organismal Development,Tissue Development	Development of connective tissue cells	0.00163		-0.719	CCR1,CD4,CHSY1,CYP1A1,HES1,ID2,IRF8,ITGA5,KLF4,PAK1,SLC40A1,TGFB1I1,TSPAN13,TXNIP	14
	Cell Death and Survival,Organismal Injury and Abnormalities	Cell death of leukocyte cell lines	8.79e-05		-0.721	ATF4,BCL2L1,CCND2,CCR5,HES1,ITGA5,MCL1,PIM1,Serpinb6b,SH3BP2,TRIB2,TRPM2	12
	Cancer,Organismal Injury and Abnormalities	Benign solid tumor	0.000487		-0.739	ADAMTS1,BCL10,BCL2L1,BDNF,CCND2,CCR5,CEBPD,CEBPG,CHKA,COL12A1,CWC22,DENND4B,ERRFI1,GADD45G,HES1,HMGA1,HSP90AB1,IQGAP2,KLF10,KLF2,KLF4,KLF5,KLF6,MEX3D,NR4A2,NR4A3,PPP1R3D,PTGER4,RASSF1,RPS6KA2,S1PR1,SEC22B,SOX18,SPIB,SPRY2,SPRY4,TET2,TNFRSF12A	38
	Cancer,Organismal Injury and Abnormalities	Development of benign tumor	0.00296		-0.739	ADAMTS1,BCL2L1,BDNF,CCND2,CEBPD,CHKA,CWC22,DENND4B,ERRFI1,GADD45G,HES1,HMGA1,HSP90AB1,IQGAP2,KLF10,KLF2,KLF4,KLF5,KLF6,NR4A2,RASSF1,RPS6KA2,SPIB,SPRY2,SPRY4,TET2	26
	Cancer,Organismal Injury and Abnormalities	Nonhematologic malignant neoplasm	3.52e-08		-0.741	ABTB1,ACRBP,ACTG1,ADAM11,ADAMTS1,AMOTL2,ANKRD63,APOBR,AREG,ARHGAP4,ARID3A,ARID5A,ARL4C,ATF4,ATOSA,B3GNT8,B4GALT3,BBS10,BCL10,BCL11A,BCL2L1,BCL6B,BDNF,BTBD3,C14orf119,C1orf116,C3AR1,CADPS2,CCDC117,CCDC88B,CCDC88C,CCND2,CCNL1,CCR1,CCR5,CD180,CD4,CDR2,CEBPD,CEBPG,CELSR1,CHKA,CHSY1,CITED2,CLDND1,CLEC1A,CLEC9A,CLK1,CLK4,CNN3,COL12A1,CREM,CRKL,CSRNP1,CSRNP2,CTTNBP2NL,CWC22,CX3CR1,CXCL16,CXCL17,CYP1A1,C…	277
	Cellular Compromise,Inflammatory Response	Degranulation of leukocytes	0.000557		-0.742	C3AR1,CX3CR1,FOXF1,IL17RB,NR4A3,ORAI2,PAK1,Pvr,RABGEF1,S1PR2,SH3BP2	11
	Cellular Function and Maintenance	Ion homeostasis of cells	0.000789		-0.742	ADAMTS1,ATF4,BDNF,C3AR1,CCR1,CCR5,CD4,CXCL17,ETS2,GDNF,GNB1,IPMK,KCNJ2,KLF2,ORAI2,PAK1,PTGER4,RGS2,S1PR1,SLC11A1,SLC25A25,SLC40A1,TRPM2,ZNG1A	24
	Cellular Development,Connective Tissue Development and Function,Tissue Development	Differentiation of connective tissue cells	2.6e-08		-0.759	AREG,ARID5A,ATF4,C3AR1,CCR1,CEBPD,CSRNP1,DYNLL1,EPHA2,FOSL2,GDNF,HES1,HMGA1,ID2,ITGA5,KLF10,KLF4,KLF5,MAFK,MEX3C,NEDD9,NR4A2,NR4A3,OSR1,PIM1,PTGER4,RGS2,RIOX1,SH3BP2,SOCS7,TGFB1I1,TNFAIP6,TOB2,TRIB2,TSC22D3,YWHAH,ZFP36L2	37
	Cellular Development,Connective Tissue Development and Function,Tissue Development	Differentiation of bone	0.00018		-0.76	AREG,ATF4,C3AR1,CCR1,CEBPD,DYNLL1,EPHA2,FOSL2,ID2,ITGA5,KLF10,KLF4,KLF5,NEDD9,PTGER4,RIOX1,SH3BP2,TNFAIP6,TOB2	19
	Cell Death and Survival,Organismal Injury and Abnormalities	Apoptosis of leukocyte cell lines	0.000344		-0.764	ATF4,BCL2L1,CCND2,CCR5,HES1,ITGA5,MCL1,PIM1,SH3BP2,TRIB2	10
	Organismal Injury and Abnormalities	Benign lesion	0.000458		-0.769	ADAMTS1,BCL10,BCL2L1,BDNF,CCND2,CCR5,CEBPD,CEBPG,CHKA,COL12A1,CWC22,DENND4B,ERRFI1,GADD45G,HES1,HMGA1,HSP90AB1,IQGAP2,KLF10,KLF2,KLF4,KLF5,KLF6,MEX3D,NR4A2,NR4A3,PAK1,PPP1R3D,PTGER4,RASSF1,RPS6KA2,S1PR1,SEC22B,SLC11A1,SOX18,SPIB,SPRY2,SPRY4,TET2,TNFRSF12A,TSPAN32,YWHAZ	42
	Organismal Injury and Abnormalities	Non-malignant disorder	1.04e-05		-0.784	ACTG1,ADAMTS1,AREG,ATF4,BCL10,BCL2L1,BDNF,BTBD3,C3AR1,CCND2,CCR1,CCR5,CD180,CEBPD,CEBPG,CELSR1,CHKA,CHSY1,CITED2,CLEC1A,COL12A1,CSRNP1,CWC22,CX3CR1,DENND4B,DYNLL1,EDARADD,ENTR1,ERRFI1,ETS2,FOSL2,GADD45G,HES1,HMGA1,HSP90AA1,HSP90AB1,IQGAP2,IRF8,ITGA5,KCNJ2,KLF10,KLF2,KLF4,KLF5,KLF6,LCAT,LFNG,MEX3D,MYADM,NR4A2,NR4A3,PAK1,PDE4B,PPP1R3D,PTGER4,RASSF1,RNASE6,RPS6KA2,S1PR1,SEC22B,SH3RF3,SNIP1,SOX18,SPI…	71
	Cellular Movement	Invasion of stomach cancer cell lines	0.00251		-0.784	IRX1,MCAM,RASSF1,SOX18	4
	Cell Death and Survival	Cell death of oligodendrocytes	0.00251		-0.798	BCL2L1,BDNF,HSP90AB1,MCL1,TNFRSF10A	5
	Cellular Compromise,Hypersensitivity Response,Inflammatory Response	Degranulation of mast cells	0.00211		-0.808	C3AR1,FOXF1,NR4A3,ORAI2,PAK1,RABGEF1,S1PR2,SH3BP2	8
	Cancer,Neurological Disease,Organismal Injury and Abnormalities	Nervous system neoplasm	0.000116		-0.818	ABTB1,ACRBP,ADAM11,ADAMTS1,AMOTL2,APOBR,ARHGAP4,ARID3A,ARID5A,ARL4C,ATF4,ATOSA,B3GNT8,BCL10,BCL11A,BCL2L1,BCL6B,BDNF,C1orf116,CADPS2,CCDC88B,CCDC88C,CCND2,CCNL1,CCR1,CCR5,CD180,CD4,CDR2,CELSR1,CHSY1,CLDND1,CLEC9A,CLK4,CNN3,COL12A1,CREM,CRKL,CSRNP1,CSRNP2,CWC22,CX3CR1,CXCL16,CYP1A1,DENND4B,DNAJB1,DUSP16,DUSP8,EDARADD,EGFL7,ENPEP,EPC1,EPHA2,ERLIN1,ERRFI1,ETS2,FBXO46,FCHO1,FILIP1L,FOSL2,FRMD6,GADD45…	172
	Post-Translational Modification	Phosphorylation of protein	0.0016		-0.856	AREG,BCL10,CCDC88C,CCND2,CCR1,CD4,CLK1,CLK4,CRKL,DYNLL1,EFNA1,GBP6,HSP90AA1,MAPK6,MYADM,PAK1,PIM1,PTGER4,RABGEF1,RPS6KA2,SESN2,SNRK,SPIB,ULK1,YWHAZ	25
	Hematological System Development and Function,Tissue Morphology	Quantity of myeloid cells	1.79e-09		-0.875	ARID3A,BCL2L1,BCL6B,BDNF,C3AR1,CCND2,CCR1,CCR5,CEBPG,CX3CR1,CXCL17,CYP1A1,CYTH2,DUSP3,EPHA2,FOSL2,ID2,IL17RB,IRF8,KLF13,KLF2,KLF5,LCAT,MAFK,MCL1,PDE4B,PIM1,PTGIR,RABGEF1,RCAN1,RPS6KA2,S1PR2,SLC40A1,SPRY2,TET2,TNFRSF25,TSC22D3,ULK1,ZFP36L2	39
	Cell-To-Cell Signaling and Interaction,Cellular Movement,Hematological System Development and Function,Immune Cell Trafficking	Recruitment of granulocytes	0.000193		-0.878	C3AR1,CCR1,CCR5,CITED2,CX3CR1,CYP1A1,FOSL2,IL17RB,PDE4B,RCAN1,S1PR1,SPATA2,TRPM2	13
	Cell-To-Cell Signaling and Interaction,Cellular Movement,Hematological System Development and Function,Immune Cell Trafficking,Inflammatory Response	Recruitment of phagocytes	0.000478		-0.879	C3AR1,CCR1,CCR5,CD4,CITED2,CX3CR1,CYP1A1,FOSL2,IL17RB,PDE4B,RCAN1,S1PR1,SPATA2,TRPM2	14
	Cell Death and Survival,Organismal Injury and Abnormalities,Skeletal and Muscular Disorders	Cell death of muscle cell lines	0.00224		-0.883	BCL2L1,KLF13,SESN2,TGFB1I1,TNFRSF10A,TXNIP	6
	Cell Death and Survival,Organismal Injury and Abnormalities	Cell death of neuroblastoma cell lines	0.00205		-0.901	ATF4,BCL2L1,BDNF,DNAJB1,GDNF,HMGA1,MCL1,PAK1,RCAN1,TRPM2	10
	Cell Death and Survival,Organismal Injury and Abnormalities	Apoptosis of B-lymphocyte derived cell lines	0.00126		-0.91	BCL2L1,CCND2,HES1,ITGA5,MCL1,PIM1,TRIB2	7
	Cell Death and Survival,Organismal Injury and Abnormalities	Cell death of connective tissue cells	0.00243		-0.921	ATF4,BCL2L1,CRKL,ID2,KLF2,KLF6,L3MBTL2,MCL1,MTF1,NR4A2,PAK1,PIM1,PLEKHF1,Pvr,RPS6KA2,S1PR1,SPATA2,TNFRSF10A,TNFRSF25,TSG101,TXNIP,YWHAZ	22
	Cellular Development,Cellular Growth and Proliferation,Hematological System Development and Function,Hematopoiesis,Lymphoid Tissue Structure and Development,Tissue Development	Development of antigen presenting cells	0.000857		-0.934	BCL11A,GADD45G,HES1,ID2,IRF8,KLF4,SLC40A1,SPIB,TET2,TRPM2,TSPAN2,ZNF831	12
	Neurological Disease,Organismal Injury and Abnormalities	Seizure disorder	1.91e-05		-0.937	BCL11A,BDNF,CCR1,CEBPD,CITED2,CREM,DNAJB1,DNAJB5,ERRFI1,EXOC8,FBXO28,GADD45G,GDNF,HES1,HSP90AB1,ID2,IRF8,KLF10,LRRC8A,MCL1,NR4A2,NR4A3,PAK1,RGS2,RTN4IP1,S1PR2,SERTAD1,SLC25A25,SNIP1,SPRY2	30
	Neurological Disease,Organismal Injury and Abnormalities	Seizures	5.3e-05		-0.937	BDNF,CCR1,CEBPD,CITED2,CREM,DNAJB1,DNAJB5,ERRFI1,GADD45G,GDNF,HES1,ID2,IRF8,KLF10,LRRC8A,MCL1,NR4A3,PAK1,RGS2,RTN4IP1,S1PR2,SERTAD1,SLC25A25,SNIP1,SPRY2	25
	Cancer,Organismal Injury and Abnormalities	Non-hematological solid tumor	3e-08		-0.956	ABTB1,ACRBP,ACTG1,ADAM11,ADAMTS1,AMOTL2,ANKRD63,APOBR,AREG,ARHGAP4,ARID3A,ARID5A,ARL4C,ATF4,ATOSA,B3GNT8,B4GALT3,BBS10,BCL10,BCL11A,BCL2L1,BCL6B,BDNF,BTBD3,C14orf119,C1orf116,C3AR1,CADPS2,CCDC117,CCDC88B,CCDC88C,CCND2,CCNL1,CCR1,CCR5,CD180,CD4,CDR2,CEBPD,CEBPG,CELSR1,CHKA,CHSY1,CITED2,CLDND1,CLEC1A,CLEC9A,CLK1,CLK4,CNN3,COL12A1,CREM,CRKL,CSRNP1,CSRNP2,CTTNBP2NL,CWC22,CX3CR1,CXCL16,CXCL17,CYP1A1,C…	278
	Cellular Development,Connective Tissue Development and Function,Tissue Development	Differentiation of bone cells	0.000445		-0.97	AREG,ATF4,C3AR1,CCR1,CEBPD,DYNLL1,EPHA2,FOSL2,ID2,ITGA5,KLF10,KLF4,NEDD9,PTGER4,RIOX1,SH3BP2,TNFAIP6,TOB2	18
	Hematological Disease,Immunological Disease,Infectious Diseases,Organismal Injury and Abnormalities	Infection of mononuclear leukocytes	0.000778		-0.975	CCR1,CCR5,CD4,KLF2	4
	Cell Death and Survival,Organismal Injury and Abnormalities	Apoptosis of keratinocytes	0.00184		-0.975	BCL2L1,BDNF,KLF10,MCL1,PAK1,TNFRSF10A	6
	Cell Death and Survival,Organismal Injury and Abnormalities	Apoptosis of prostate cancer cell lines	0.000158		-0.983	BCL2L1,BDNF,DYNLL1,ETS2,GADD45G,KLF6,MCL1,PAK1,PER1,PIM1,SIAH2,TNFRSF10A	12
	Cancer,Organismal Injury and Abnormalities	Melanoma	9.28e-05		-0.99	ABTB1,ACRBP,ACTG1,ADAM11,ADAMTS1,AMOTL2,ANKRD63,APOBR,AREG,ARHGAP4,ARID5A,ATOSA,B3GNT8,BBS10,BCL10,BCL11A,BCL2L1,BCL6B,BDNF,BTBD3,C1orf116,C3AR1,CADPS2,CCDC117,CCDC88B,CCDC88C,CCR1,CCR5,CD180,CD4,CDR2,CEBPG,CELSR1,CHKA,CLEC1A,CLEC9A,CLK1,CLK4,CNN3,COL12A1,CREM,CSRNP1,CSRNP2,CTTNBP2NL,CWC22,CX3CR1,CXCL16,CXCL17,CYP1A1,CYTH2,DENND4B,DNAJB1,DNAJB5,DSTN,DUSP16,DUSP8,EDARADD,EFNA1,ENPEP,EPC1,EPHA2,ERL…	197
	Cell Signaling,Cellular Function and Maintenance,Molecular Transport,Vitamin and Mineral Metabolism	Flux of Ca2+	0.000573		-0.991	BDNF,CCR1,CCR5,CD4,CXCL17,ETS2,GDNF,IPMK,KLF2,ORAI2,PAK1,RGS2,S1PR1,SLC25A25,TRPM2	15
	DNA Replication, Recombination, and Repair	Synthesis of DNA	0.00124		-0.991	AREG,BCL2L1,BDNF,CCND2,CD180,CD4,CREM,ERRFI1,GDNF,ITGA5,KLF2,LIG4,MCL1,NR4A3,PIM1,RASSF1,S1PR2	17
	Cancer,Organismal Injury and Abnormalities	Abdominal adenocarcinoma	2.05e-08		-1	ABTB1,ACRBP,ACTG1,ADAM11,ADAMTS1,AMOTL2,APOBR,AREG,ARHGAP4,ARID3A,ARID5A,ARL4C,ATF4,ATOSA,B3GNT8,B4GALT3,BBS10,BCL10,BCL11A,BCL2L1,BCL6B,BDNF,BTBD3,C1orf116,C3AR1,CADPS2,CCDC117,CCDC88B,CCDC88C,CCND2,CCNL1,CCR1,CD180,CD4,CDR2,CEBPD,CEBPG,CELSR1,CHKA,CHSY1,CITED2,CLDND1,CLEC1A,CLEC9A,CLK1,CLK4,COL12A1,CREM,CRKL,CSRNP1,CSRNP2,CTTNBP2NL,CWC22,CX3CR1,CXCL16,CXCL17,CYP1A1,CYTH2,DENND4B,DNAJA1,DNAJB5,D…	249
	Cell Cycle,Cellular Development,Respiratory System Development and Function	Senescence of lung cell lines	0.00142		-1	HLX,HSP90AA1,HSP90AB1,KLF4,TAB1,TRIM16	6
	Hematological System Development and Function,Humoral Immune Response,Lymphoid Tissue Structure and Development,Tissue Morphology	Quantity of B-2 lymphocytes	0.00162		-1	ARID3A,ID2,KLF2,SPIB	4
	Cellular Development,Cellular Growth and Proliferation,Hematological System Development and Function,Hematopoiesis,Lymphoid Tissue Structure and Development,Tissue Development	Differentiation of antigen presenting cells	0.00236		-1	BCL11A,CD4,GADD45G,HMGA1,ID2,IRF8,KLF4,SPIB,TET2,TRPM2,ULK1,ZNF831	12
	Cancer,Gastrointestinal Disease,Organismal Injury and Abnormalities	Colon tumor	0.00238		-1	ABTB1,ACTG1,ADAM11,ADAMTS1,AMOTL2,APOBR,AREG,ARHGAP4,ATOSA,B3GNT8,BCL10,BCL11A,BCL2L1,BCL6B,BDNF,BTBD3,C1orf116,C3AR1,CADPS2,CCDC117,CCDC88B,CCDC88C,CD4,CELSR1,CHSY1,CLDND1,COL12A1,CSRNP2,CTTNBP2NL,CWC22,CX3CR1,DENND4B,DNAJA1,DND1,DSTN,DUSP16,DUSP3,EGFL7,EPC1,EPHA2,EXOC8,FASTKD3,FBXO46,FCHO1,FILIP1L,GDNF,GNB1,HES1,HID1,HLX,HPGD,HSP90AB1,IL17RB,IPMK,IQGAP2,IRF8,IRX2,ITGA5,KIF5C,KLF2,KLF4,KLF5,KLF6…	123
	Developmental Disorder,Gastrointestinal Disease,Hepatic System Disease,Organismal Injury and Abnormalities	Liver Hypoplasia	0.00295		-1	ARID3A,ATF4,HLX,MAFK	4
	Cell Death and Survival,Organismal Injury and Abnormalities	Apoptosis of tumor cell lines	1.35e-06		-1.078	AREG,ARHGAP4,ATF4,BCL10,BCL2L1,BCL6B,BDNF,CCR5,CD4,CEBPD,CHKA,CREM,DNAJB1,DYNLL1,EPHA2,ERRFI1,ETS2,GADD45G,GDNF,GEM,HES1,HMGA1,HSP90AB1,IL17RB,IRF8,IRX1,KLF10,KLF2,KLF4,KLF5,KLF6,MCL1,MDC1,MEX3A,NEDD9,NR4A2,NR4A3,OSGIN1,PAK1,PDE4B,PER1,PIM1,PPP1R10,RASSF1,RCAN1,RIOX1,S1PR2,SAR1A,SIAH2,SPRY2,TNFRSF10A,TNFRSF25,TRIB2,TRIM32,TRPM2,TSC22D3,TSG101,ULK1,YWHAZ	59
	Cellular Development,Connective Tissue Development and Function	Differentiation of fibroblast cell lines	0.000612		-1.086	ARID5A,HES1,HSP90AA1,ITGA5,KLF4,RGS2,S1PR1,S1PR2,TNFAIP6,TOB2,TRIB2	11
	Cell-To-Cell Signaling and Interaction,Hematological System Development and Function	Activation of blood cells	0.00161		-1.116	BCL10,BCL2L1,BDNF,C3AR1,CCDC88B,CCR5,CD180,CD4,CX3CR1,DUSP3,GDNF,ID2,IRF8,ITGA5,JMJD6,KLF2,KLF4,LFNG,NR4A2,NR4A3,PTGER4,PTGIR,RABGEF1,SLC11A1,SRF,TNFRSF10A,TRPM2,TSPAN32,TXNIP	29
	Cellular Development,Connective Tissue Development and Function	Differentiation of adipose cell lines	2.72e-05		-1.134	ARID5A,CSRNP1,FOSL2,HMGA1,ID2,TNFRSF12A,YWHAH	7
	Cell Death and Survival,Organismal Injury and Abnormalities	Neuronal cell death	0.00124		-1.137	AREG,ATF4,BCL2L1,BDNF,CADPS2,CCR5,CD4,CREM,CX3CR1,DUSP8,ETS2,GDNF,HSP90AB1,ID2,ITGA5,KLF6,KMO,LIG4,MCL1,NDEL1,Nes,NR4A2,NR4A3,PAK1,PPCDC,RCAN1,SNRK,TNFRSF10A,YWHAZ	29
	Cell Death and Survival	Cellular degradation	0.00134		-1.148	BBS10,BCL2L1,BDNF,Cmah,CREM,CX3CR1,ETS2,GDNF,GNB1,MAFK,NR4A2,NR4A3,S1PR2,TSG101,TSPAN2	15
	Cancer,Organismal Injury and Abnormalities	Metastasis of stomach cancer cell lines	0.00212		-1.188	EPHA2,IRX1,ORAI2,SOX18	4
	Cell-To-Cell Signaling and Interaction,Cellular Movement	Recruitment of myeloid cells	0.00105		-1.195	C3AR1,CCR1,CCR5,CD4,CITED2,CX3CR1,CYP1A1,FOSL2,IL17RB,PDE4B,RCAN1,S1PR1,SPATA2,TRPM2	14
	Cell Signaling,Molecular Transport,Vitamin and Mineral Metabolism	Mobilization of Ca2+	0.00181		-1.241	BCL2L1,BDNF,C3AR1,CCR1,CCR5,CD180,CD4,CX3CR1,CXCL16,CXCL17,GNB1,PTGIR,S1PR2,SH3BP2	14
	Infectious Diseases,Organismal Injury and Abnormalities	Release of virus	0.00173		-1.293	BCL2L1,CYP1A1,MCL1,TSG101,TXNIP	5
	Cancer,Organismal Injury and Abnormalities	Adenocarcinoma	8.65e-09		-1.342	ABTB1,ACRBP,ACTG1,ADAM11,ADAMTS1,AMOTL2,APOBR,AREG,ARHGAP4,ARID3A,ARID5A,ARL4C,ATF4,ATOSA,B3GNT8,B4GALT3,BBS10,BCL10,BCL11A,BCL2L1,BCL6B,BDNF,BTBD3,C14orf119,C1orf116,C3AR1,CADPS2,CCDC117,CCDC88B,CCDC88C,CCND2,CCNL1,CCR1,CD180,CD4,CDR2,CEBPD,CEBPG,CELSR1,CHKA,CHSY1,CITED2,CLDND1,CLEC1A,CLEC9A,CLK1,CLK4,COL12A1,CREM,CRKL,CSRNP1,CSRNP2,CTTNBP2NL,CWC22,CX3CR1,CXCL16,CXCL17,CYP1A1,CYTH2,DENND4B,DNAJA…	254
	Hematological System Development and Function,Inflammatory Response,Tissue Morphology	Quantity of phagocytes	0.000193		-1.395	BCL11A,BCL6B,C3AR1,CCR1,CCR5,CEBPG,CX3CR1,CXCL17,CYP1A1,DUSP3,EPHA2,FOSL2,ID2,IL17RB,IRF8,KLF5,MCL1,PDE4B,PTGIR,RABGEF1,S1PR2,SPIB,ZFP36L2	23
	Cancer,Neurological Disease,Organismal Injury and Abnormalities	Central nervous system solid tumor	9.08e-05		-1.412	ABTB1,ACRBP,ADAM11,ADAMTS1,AMOTL2,APOBR,ARHGAP4,ARID3A,ARID5A,ARL4C,ATF4,ATOSA,B3GNT8,BCL10,BCL11A,BCL2L1,BCL6B,BDNF,C1orf116,CADPS2,CCDC88B,CCDC88C,CCND2,CCNL1,CCR1,CCR5,CD180,CD4,CDR2,CELSR1,CHSY1,CLDND1,CLEC9A,CLK4,CNN3,COL12A1,CREM,CRKL,CSRNP1,CSRNP2,CWC22,CX3CR1,CXCL16,CYP1A1,DENND4B,DNAJB1,DUSP16,DUSP8,EDARADD,EGFL7,ENPEP,EPC1,EPHA2,ERLIN1,ERRFI1,ETS2,FBXO46,FCHO1,FILIP1L,FOSL2,FRMD6,GADD45…	171
	Cellular Development,Cellular Growth and Proliferation,Hematological System Development and Function,Hematopoiesis,Lymphoid Tissue Structure and Development,Tissue Development	Dendropoiesis	0.00297		-1.414	BCL11A,GADD45G,ID2,IRF8,KLF4,SPIB,TET2,TRPM2,ZNF831	9
	Inflammatory Response	Inflammatory response	0.00215		-1.457	BDNF,C3AR1,CCR1,CCR5,CD4,CEBPD,Ctla2a/Ctla2b,CX3CR1,CXCL16,CXCL17,EPHA2,FOXF1,GDNF,IL17RB,ITGA5,JMJD6,KLF4,MCL1,NEDD9,NR4A2,PDE4B,PTGER4,RABGEF1,S1PR1,SLC11A1,SOCS5,SPATA2,TNFAIP6,TRPM2,TSPAN2	30
	Cell Death and Survival,Organismal Injury and Abnormalities	Apoptosis of cervical cancer cell lines	0.000614		-1.474	ARHGAP4,BCL2L1,CCR5,CEBPD,DYNLL1,GADD45G,MCL1,NEDD9,NR4A2,PAK1,PPP1R10,RASSF1,RIOX1,TNFRSF10A,TRIM32	15
	Cell Death and Survival,Cellular Compromise,Neurological Disease,Organismal Injury and Abnormalities,Tissue Morphology	Degeneration of neurons	0.002		-1.477	BBS10,BCL2L1,BDNF,Cmah,CREM,CX3CR1,ETS2,GDNF,GNB1,MAFK,NR4A2,NR4A3,S1PR2,TSPAN2	14
	Organismal Injury and Abnormalities	Soft tissue lesion	0.000546		-1.491	ABTB1,ACRBP,ADAM11,ADAMTS1,AMOTL2,APOBR,ARHGAP4,ARID3A,ARID5A,ATOSA,B3GNT8,BCL11A,BCL2L1,BCL6B,BDNF,CADPS2,CCDC88B,CCDC88C,CCND2,CCNL1,CCR1,CCR5,CD4,CDR2,CELSR1,CHSY1,CLDND1,CLEC9A,CNN3,COL12A1,CREM,CRKL,CSRNP1,CSRNP2,CWC22,CX3CR1,CXCL16,CYP1A1,DENND4B,DNAJB1,DUSP16,EDARADD,EGFL7,ENPEP,EPC1,EPHA2,ERLIN1,ERRFI1,ETS2,FBXO46,FCHO1,FILIP1L,FOXF1,FRMD6,GADD45G,GDNF,GEM,HMGA1,HPGD,HSP90AA1,HSP90AB1,IPM…	168
	Neurological Disease,Organismal Injury and Abnormalities	Brain lesion	0.00247		-1.491	ABTB1,ACRBP,ADAM11,ADAMTS1,AMOTL2,APOBR,ARHGAP4,ARID3A,ARID5A,ATOSA,B3GNT8,BCL11A,BCL2L1,BCL6B,BDNF,CADPS2,CCDC88B,CCDC88C,CCND2,CCNL1,CCR1,CCR5,CD4,CDR2,CELSR1,CHSY1,CLDND1,CLEC9A,CNN3,COL12A1,CREM,CRKL,CSRNP1,CSRNP2,CWC22,CX3CR1,CXCL16,CYP1A1,DENND4B,DNAJB1,DUSP16,EDARADD,EGFL7,ENPEP,EPC1,EPHA2,ERLIN1,ERRFI1,ETS2,FBXO46,FCHO1,FILIP1L,FRMD6,GADD45G,GDNF,GEM,HPGD,HSP90AA1,HSP90AB1,IPMK,IQGAP2,ITG…	156
	Cancer,Organismal Injury and Abnormalities	Growth of subcutaneous tumor	0.00314		-1.534	ATF4,RNF123,S1PR1,S1PR2,SLC40A1,SOCS7,TNFRSF10A,TRIM32,TRPM2	9
	Cell Death and Survival	Apoptosis of stem cells	9.15e-06		-1.539	BCL2L1,GADD45G,GEM,HES1,HMGA1,ID2,ITGA5,KLF5,SRF	9
	Hematological System Development and Function,Hypersensitivity Response,Tissue Morphology	Quantity of eosinophils	1e-05		-1.576	C3AR1,CCR1,CCR5,CYTH2,EPHA2,IL17RB,IRF8,KLF5,PTGIR,SPRY2,TNFRSF25	11
	Cell Death and Survival,Organismal Injury and Abnormalities	Apoptosis of vascular endothelial cells	7.35e-05		-1.632	BCL2L1,CCDC88B,CCR5,KLF4,KLF5,MCAM,MCL1,NR4A3,TNFRSF10A	9
	Cellular Compromise,Inflammatory Response	Degranulation of myeloid cells	0.00228		-1.65	C3AR1,FOXF1,IL17RB,NR4A3,ORAI2,PAK1,RABGEF1,S1PR2,SH3BP2	9
	Cell Signaling	MAPKKK cascade	0.00256		-1.664	CD4,CRKL,DUSP16,DUSP3,EFNA1,GADD45G,PAK1,SLC11A1,STK40,TAB1,ZFP36L2	11
	Hematological System Development and Function,Lymphoid Tissue Structure and Development,Tissue Morphology	Quantity of regulatory T lymphocytes	0.000284		-1.691	CCR5,CXCL17,ID2,IPMK,IRF8,KLF10,LRRC8A,TNFRSF25,TXNIP,UBL4A	10
	Neurological Disease,Organismal Injury and Abnormalities,Tissue Morphology	Neurodegeneration of nervous tissue	0.000898		-1.703	BBS10,BCL2L1,BDNF,Cmah,CREM,CX3CR1,ETS2,GDNF,GNB1,MAFK,MCL1,NR4A2,NR4A3,S1PR2,TSPAN2	15
	Cell Death and Survival,Organismal Injury and Abnormalities	Apoptosis of myeloma cell lines	0.00323		-1.709	ATF4,BCL2L1,IRF8,KLF10,MCL1,TNFRSF10A	6
	Metabolic Disease,Organismal Injury and Abnormalities	Glucose metabolism disorder	5.69e-05		-1.724	9930111J21Rik2,ADAMTS1,APOBR,ATF4,BCL2L1,BDNF,C3AR1,CCDC88C,CCND2,CCR1,CCR5,CD180,CD4,CEBPD,CLEC9A,COL12A1,CREM,CSRNP1,CX3CR1,CXCL16,ENPEP,ERRFI1,ETS2,FBXO28,FOSL2,FOXF1,GBP6,GEM,Gm12279,HAAO,HES1,HMGA1,HPGD,I730030J21Rik,KCNJ2,KLF10,KLF4,KLF5,KMO,LCAT,LRRC8A,MAPK6,MCAM,MDC1,MUCL3,MYL12B,NR4A2,NR4A3,PAK1,PDE4B,PER1,PTGER4,PTGIR,RAB3A,RNASE6,S1PR2,SESN2,SLC40A1,SOCS7,SP110,SPIB,TET2,TSC22D3,TSPAN2…	67
	Cell Death and Survival,Organismal Injury and Abnormalities	Apoptosis of endothelial cells	0.000137		-1.726	ADAMTS1,BCL2L1,BDNF,CCDC88B,CCR5,FOXF1,KLF4,KLF5,MCAM,MCL1,NR4A3,TNFRSF10A	12
	Cell Death and Survival	Cell death of stem cells	7.45e-06		-1.803	BCL2L1,GADD45G,GEM,HES1,HMGA1,ID2,ITGA5,KLF4,KLF5,SRF	10
	Cancer,Organismal Injury and Abnormalities	Subcutaneous tumor	0.000213		-1.893	ADAMTS1,ATF4,BCL10,BCL2L1,COL12A1,HMGA1,HSP90AB1,MEX3D,NR4A2,NR4A3,PPP1R3D,PTGER4,RNF123,S1PR1,S1PR2,SEC22B,SLC40A1,SOCS7,SOX18,TNFRSF10A,TRIM32,TRPM2	22
	Cell Death and Survival,Organismal Injury and Abnormalities	Cell death of endothelial cells	0.000111		-1.928	ADAMTS1,BCL2L1,BDNF,CCDC88B,CCR5,FOXF1,KLF2,KLF4,KLF5,MCAM,MCL1,NR4A3,TNFRSF10A	13
	Cellular Function and Maintenance	Function of leukocytes	1.78e-07		-1.941	BCL10,BCL2L1,C3AR1,CCR1,CCR5,CD4,CEBPG,Cmah,CX3CR1,GADD45G,HSP90AA1,IRF8,KLF10,KLF2,LRRC8A,MCL1,NEDD9,ORAI2,PAK1,PIM1,PTGER4,RCAN1,S1PR1,SH3BP2,TET2,TRPM2,TXNIP	27
	Cellular Function and Maintenance	Function of lymphatic system cells	1.97e-07		-1.941	BCL10,BCL2L1,C3AR1,CCR5,CD4,CEBPG,Cmah,CX3CR1,GADD45G,IRF8,KLF10,KLF2,LRRC8A,MCL1,NEDD9,RCAN1,S1PR1,SH3BP2,TET2,TXNIP,ZFP36L2	21
	Cellular Function and Maintenance,Hematological System Development and Function	Function of lymphocytes	3.27e-07		-1.941	BCL10,BCL2L1,C3AR1,CCR5,CD4,CEBPG,Cmah,CX3CR1,GADD45G,IRF8,KLF10,KLF2,LRRC8A,MCL1,NEDD9,RCAN1,S1PR1,SH3BP2,TET2,TXNIP	20
	Cellular Development,Connective Tissue Development and Function,Embryonic Development,Organismal Development,Skeletal and Muscular System Development and Function,Tissue Development	Differentiation of osteoclasts	0.000158		-1.961	AREG,C3AR1,CCR1,DYNLL1,EPHA2,KLF10,KLF4,NEDD9,PTGER4,SH3BP2,TNFAIP6,TOB2	12
	Neurological Disease,Organismal Injury and Abnormalities	Abnormality of striatum	0.00151		-1.977	BCL2L1,BDNF,CREM,GDNF,LIG4	5
	Cardiovascular System Development and Function,Cell Morphology	Branching of vasculature	0.00121		-1.987	ADAMTS1,GEM,HLX,S1PR1,S1PR2,SPRY2,SPRY4	7
	Cell Signaling	Small GTPase mediated signal transduction	2.54e-05	Decreased	-2	ARHGAP4,CCDC88C,CELSR1,CRKL,GNB1,PAK1,PPP2CB,RABGEF1,RASSF1,SIAH2,SPRY2,SYDE1,SYDE2,TAX1BP3,TNFAIP1,ULK1	16
	Cellular Development,Connective Tissue Development and Function,Tissue Development	Differentiation of adipocytes	4.9e-06	Decreased	-2.004	ARID5A,CEBPD,CSRNP1,FOSL2,HES1,HMGA1,ID2,KLF4,KLF5,MEX3C,NR4A2,NR4A3,PIM1,RGS2,SOCS7,TGFB1I1,TRIB2,YWHAH,ZFP36L2	19
	Cardiovascular System Development and Function,Cell Morphology,Organismal Development	Branching of blood vessel	0.000777	Decreased	-2.189	ADAMTS1,S1PR1,S1PR2,SPRY2,SPRY4	5
	Developmental Disorder,Organismal Injury and Abnormalities	Growth Failure	0.000777	Decreased	-2.514	AREG,ATF4,BCL6B,BDNF,CHSY1,DNAJA1,FOSL2,ID2,IPMK,ITGA5,JMJD6,KCTD10,KLF2,L3MBTL2,LRRC8A,MAPK6,NR4A3,NRARP,PIM1,POLR2A,RABGEF1,SOCS7,SPRY4,SRF	24
	Developmental Disorder,Organismal Injury and Abnormalities	Growth failure or short stature	0.00157	Decreased	-2.804	AREG,ATF4,BBS10,BCL2L1,BCL6B,BDNF,CHSY1,DNAJA1,FOSL2,ID2,IPMK,ITGA5,JMJD6,KCTD10,KLF2,L3MBTL2,LRRC8A,MAPK6,NR4A3,NRARP,PIM1,POLR2A,RABGEF1,SOCS7,SPRY4,SRF,TXNIP	27
	Organismal Injury and Abnormalities,Organismal Survival	Neonatal death	0.000729	Decreased	-3.238	BCL11A,BDNF,CADPS2,CEBPD,CEBPG,CNN3,GDNF,HPGD,ID2,KCNJ2,KLF4,LIG4,NR4A2,PDE4B,RAB3A,RABGEF1,SNRK,UBL4A	18
	Organismal Injury and Abnormalities,Organismal Survival	Perinatal death	1.02e-07	Decreased	-3.959	ACTG1,ADAMTS1,ATF4,BCL10,BCL11A,BDNF,CADPS2,CEBPD,CEBPG,CITED2,CNN3,COL12A1,GDNF,HES1,HLX,HPGD,ID2,JMJD6,KCNJ2,KLF4,LIG4,NR4A2,PDE4B,PTGER4,RAB3A,RABGEF1,S1PR2,SIAH2,SNRK,SPRY2,SPRY4,UBL4A	32
	Organismal Injury and Abnormalities,Organismal Survival	Organismal death	7.94e-17	Decreased	-4.129	ACRBP,ACTG1,ADAMTS1,AREG,ARID3A,ARID5A,ATF4,BCL10,BCL11A,BCL2L1,BDNF,C3AR1,CADPS2,CCND2,CCR1,CCR5,CD4,CEBPD,CEBPG,CELSR1,CHKA,CITED2,CLK1,Cmah,CNN3,COL12A1,CREM,CRKL,CSRNP1,CSRNP2,Ctla2a/Ctla2b,CX3CR1,CYP1A1,DNAJA1,DNAJB1,DND1,EGFL7,ERRFI1,ETS2,FBXO28,FOSL2,FOXF1,GADD45G,GDNF,GNB1,HES1,HLX,HMGA1,HPGD,HSP90AA1,HSP90AB1,ID2,IL17RB,IPMK,IQGAP2,IRF8,ITGA5,JMJD6,KCNJ2,KCTD10,KLF10,KLF2,KLF4,KLF5,KLF6,…	121

## Sheet: f IPA USRs 2dpi
	Upstream Regulator	Expr Log Ratio	Molecule Type	Predicted Activation State	Activation z-score	p-value of overlap	Target Molecules in Dataset	Mechanistic Network			Cytokine USRs	Molecule Type	Predicted Activation State	Activation z-score	p-value of overlap	Target Molecules in Dataset
Microplastic vs. PBS at 2 days post delivery. IPA UpStream Regulators.	CREB1		transcription regulator	Activated	3.267	4.56e-09	BCL2L1,BDNF,CADPS2,CD4,CEBPD,CREM,CSRNP1,ERRFI1,FRMD6,GADD45G,GEM,HPGD,KLF4,KLF5,MCAM,MCL1,NR4A2,NR4A3,PER1,POLR2A,Pvr,RASGEF1B,RGS2,SERTAD1,SIAH2,SPTY2D1,Tpm4	125 (14)			IL1B	cytokine	Activated	2.858	1.38e-08	ADAMTS1,ATF4,BCL2L1,CCR1,CCR5,CD4,CEBPD,CEBPG,CREM,CSRNP1,CX3CR1,CXCL16,CYP1A1,EFNA1,ERRFI1,ETS2,GBP6,GEM,HES1,HMGA1,ID2,IL17RB,IRF8,ITGA5,KLF10,KLF4,MCL1,NR4A2,NR4A3,PAK1,PDE4B,PIM1,RCAN1,S1PR1,S1PR2,SLC25A25,TNFAIP6,TNFRSF10A,TSC22D3,TXNIP
	leukotriene D4		chemical - endogenous mammalian	Activated	3.212	3.98e-15	ADAMTS1,CREM,FOSL2,GEM,HLX,KCNJ2,KLF2,KLF4,MCL1,NEDD9,NR4A2,NR4A3,RCAN1,RGS2	109 (13)			IL15	cytokine	Activated	2.483	0.00621	ATF4,BCL2L1,CCND2,CCR1,CX3CR1,HLX,KLF2,MCL1,MDC1,PDE4B,PIM1,S1PR1,TNFRSF25
	beta-estradiol		chemical - endogenous mammalian	Activated	3.112	7.42e-10	ACTG1,ADAMTS1,AMOTL2,AREG,BCL10,BCL2L1,BDNF,CCND2,CCR1,CCR5,CDR2,CEBPD,CEBPG,Ces1f,CITED2,CLDND1,CREM,CRKL,CWC25,CXCL16,CYP1A1,DUSP3,DYNLL1,EFNA1,ERRFI1,ETS2,FBXO46,FOSL2,GADD45G,GDNF,GEM,GNB1,HES1,HPGD,HSP90AB1,ID2,IL17RB,IQGAP2,KLF10,KLF2,KLF4,KLF6,LRRC8A,MCAM,MICAL2,MYL12B,NEDD9,NR4A2,NR4A3,PAK1,PDE4B,PIM1,POLR2A,PPP2CB,PTGER4,RGS2,S1PR1,SIAH2,SLC25A25,SLC38A2,SOX18,SPRY2,SPRY4,TET2,TMOD2,TNFA…	164 (22)			TNF	cytokine	Activated	2.463	1.65e-14	ATF4,BCL10,BCL2L1,BDNF,BTBD3,C3AR1,CCND2,CCR1,CCR5,CD4,CEBPD,CEBPG,CITED2,CREM,CX3CR1,CXCL16,CYP1A1,DUSP16,EFNA1,EGFL7,EPHA2,ETS2,FOSL2,FOXF1,FRMD6,GADD45G,GBP6,GDNF,GEM,HES1,HID1,HPGD,HSP90AB1,IL17RB,IRF8,ITGA5,KCNJ2,KLF10,KLF2,KLF4,KLF5,KLF6,KMO,LCAT,LFNG,MCAM,MCL1,Mx1,NEDD9,NR4A2,NR4A3,NRARP,PDE4B,PIM1,PTGER4,RABGEF1,RCAN1,RGS2,S1PR1,S1PR2,SEC22B,SLC11A1,SLC40A1,SNRK,SPRY2,TGFB1I1,TNFAIP6,TNFR…
	NFkB (complex)		complex	Activated	3.079	0.00807	ARID5A,BCL11A,BCL2L1,BDNF,CCND2,CEBPD,CREM,EFNA1,FOXF1,GDNF,MCL1,Pvr,SAR1A,SPIB,TMOD2,TNFAIP6	140 (19)			IL17A	cytokine	Activated	2.368	0.0322	AREG,BCL2L1,CCR5,CEBPD,KLF2,MCL1,NR4A2,S1PR1,S1PR2
	prostaglandin E2		chemical - endogenous mammalian	Activated	3.025	2.89e-09	ADAMTS1,AREG,BCL2L1,CCR1,CCR5,CEBPD,CREM,DYNLL1,FOSL2,GBP6,ITGA5,KLF4,KLF5,MCL1,NEDD9,NR4A2,PDE4B,PTGER4,RASGEF1B,RGS2,SRF,TNFAIP6,TSC22D3	141 (20)			TNFSF13B	cytokine	Activated	2.189	0.000548	BCL2L1,CCND2,CCR1,HPGD,MCL1,NR4A2,TNFAIP6,TNFRSF12A
	MRTFB		transcription regulator	Activated	2.967	1.02e-05	ACTG1,ADAMTS1,AMOTL2,BCL2L1,FILIP1L,HPGD,ITGA5,MAFK,MTMR10,S1PR1,SRF,Tpm4				CD40LG	cytokine		1.759	0.00163	BCL2L1,CCR1,CCR5,FOSL2,HSP90AA1,ID2,LIG4,MCL1,NR4A3,PIM1,RGS2,TFAP4,TNFAIP6
	tetradecanoylphorbol acetate		chemical drug	Activated	2.952	1.21e-10	ADAMTS1,AREG,BCL2L1,BDNF,C3AR1,CCND2,CD4,CREM,CYP1A1,DUSP8,EPHA2,ERRFI1,ETS2,FOSL2,GEM,HES1,HMGA1,HSP90AB1,ID2,IRF8,ITGA5,KLF2,KLF4,KLF5,KLF6,MCL1,NR4A2,PER1,PIM1,PPP1R3D,PTGER4,PTGIR,RCAN1,RGS2,S1PR1,SLC11A1,SMG8,SPRY4,STK40,TMOD2,TNFAIP6,TNFRSF10A,TNFRSF12A,TSC22D3,TSG101	158 (22)			IL6	cytokine		1.599	2.63e-08	ADAMTS1,AREG,ARL4C,BCL2L1,BDNF,CCR1,CCR5,CEBPD,CX3CR1,CYP1A1,DUSP16,ERRFI1,ETS2,GADD45G,HPGD,ID2,IRF8,LCAT,MCL1,PIM1,PTGER4,Pvr,RASSF1,RNASE6,S1PR1,S1PR2,SLC40A1,SMIM3,SOCS5,SP110,TNFRSF12A,TNFRSF25
	HIF1A		transcription regulator	Activated	2.939	0.00309	ADAMTS1,BCL2L1,BCL6B,CCR5,CHKA,CITED2,CYP1A1,ID2,ITGA5,JMJD6,MCL1,NR4A3,NRARP,RASSF1,SESN2,SLC40A1	130 (17)			EPO	cytokine		1.491	0.00608	APOBR,BCL2L1,BDNF,CCND2,ID2,MCL1,PIM1,SEC22B,TSC22D3,TXNIP
	Ca2+		chemical - endogenous mammalian	Activated	2.902	0.000119	BCL2L1,BDNF,CCND2,CEBPD,CREM,CYP1A1,FOSL2,KLF4,MCAM,Nes,NR4A3,PER1,TSG101	109 (16)			IL1A	cytokine		1.432	0.042	ADAMTS1,BCL2L1,CYP1A1,HSP90AA1,HSP90AB1,ITGA5,MCAM
	IL1B		cytokine	Activated	2.858	1.38e-08	ADAMTS1,ATF4,BCL2L1,CCR1,CCR5,CD4,CEBPD,CEBPG,CREM,CSRNP1,CX3CR1,CXCL16,CYP1A1,EFNA1,ERRFI1,ETS2,GBP6,GEM,HES1,HMGA1,ID2,IL17RB,IRF8,ITGA5,KLF10,KLF4,MCL1,NR4A2,NR4A3,PAK1,PDE4B,PIM1,RCAN1,S1PR1,S1PR2,SLC25A25,TNFAIP6,TNFRSF10A,TSC22D3,TXNIP	135 (17)			CMTM3	cytokine		1.414	1.6e-05	AMOTL2,DNAJA1,DNAJB1,HSP90AA1,HSP90AB1,IER5,RASSF1,SESN2
	GNAS		enzyme	Activated	2.853	1.03e-09	ADAMTS1,BCL2L1,Cmah,CREM,ETS2,FOSL2,GADD45G,GEM,KLF4,NR4A2,NR4A3,PDE4B,PPP1R16B,PTGER4,RGS2,RNASE6	126 (18)			IL7	cytokine		1.383	0.0104	BCL2L1,CCND2,KLF2,MCL1,PIM1,S1PR1
	forskolin		chemical toxicant	Activated	2.841	3.26e-07	ADAMTS1,AREG,ARL4C,BCL2L1,BDNF,CCND2,CD4,CEBPD,CREM,ERRFI1,FOSL2,GADD45G,GEM,HPGD,ID2,JMJD6,KLF4,NR4A2,NR4A3,PDE4B,PER1,Pvr,RASGEF1B,RGS2,SMIM3,TNFAIP6,Tpm4,TXNIP	113 (14)			IL18	cytokine		1.316	0.00377	BCL2L1,CCR5,CX3CR1,CXCL16,FOSL2,GADD45G,HLX,TNFRSF25
	HGF		growth factor	Activated	2.805	5.74e-07	ADAMTS1,BCL2L1,CELSR1,CITED2,DYNLL1,ERRFI1,GEM,HES1,HLX,IRF8,KLF6,MCL1,NR4A2,NR4A3,PIM1,RCAN1,RGS2,SPRY2,TNFAIP6,TRIB2,YWHAH,YWHAZ	123 (15)			EDN1	cytokine		1.27	0.0486	AREG,ERRFI1,ITGA5,MCAM,PTGER4,RAB3A
	FSH		complex	Activated	2.789	5.8e-08	ADAMTS1,AMOTL2,AREG,ARL4C,BCL11A,BDNF,CCND2,CREM,DUSP3,EFNA1,FILIP1L,FOSL2,GEM,GNB1,ITGA5,JMJD6,KLF10,MAPK6,MCL1,TNFAIP6,Tpm4	151 (18)			CCL5	cytokine		1.264	0.00298	ATF4,BDNF,CCR1,CCR5,HMGA1
	dopamine		chemical - endogenous mammalian	Activated	2.772	0.00227	BCL2L1,BDNF,CSRNP1,CWC25,DUSP8,KLF4,NR4A3,PER1	117 (19)			CSF1	cytokine		1.22	0.00199	BCL2L1,CCND2,CCR1,CCR5,CX3CR1,ETS2,HPGD,ID2,IRF8,ITGA5,KLF2,SP110
	EGF		growth factor	Activated	2.752	2.76e-09	ADAMTS1,AREG,BCL2L1,CCND2,CEBPD,CREM,CYP1A1,EPHA2,ERRFI1,ETS2,FOSL2,GEM,HES1,HPGD,ID2,KLF10,MCL1,Nes,NR4A2,NR4A3,PER1,RGS2,S1PR1,SPRY2,SPRY4,TNFAIP1,TNFRSF12A,TXNIP,ULK1,YWHAH,ZFP36L2	153 (17)			THPO	cytokine		1.044	0.039	BCL2L1,CCND2,KLF4,PIM1
	norepinephrine		chemical - endogenous mammalian	Activated	2.741	0.00173	BDNF,CREM,FOSL2,GEM,MCAM,NR4A3,PDE4B,PER1	133 (18)			IFNB1	cytokine		0.967	0.000474	BCL2L1,BDNF,CCR5,COL12A1,CREM,Ctla2a/Ctla2b,CYP1A1,GBP6,Mx1,RASSF1,SPRY2,TNFRSF10A
	diclofenac		chemical drug	Activated	2.669	2.59e-07	AREG,ATF4,BCL2L1,CEBPG,DNAJB1,HPGD,KLF4,MCL1,SLC38A2,TNFRSF12A	123 (15)			NAMPT	cytokine		0.958	0.0414	BDNF,EPHA2,HPGD,KMO
	GCG		other	Activated	2.63	0.00154	BCL2L1,FOSL2,NR4A2,NR4A3,SEC22B,SLC25A25,TNFAIP6	147 (14)			CCL2	cytokine		0.896	0.00271	BCL2L1,CEBPD,ITGA5,KLF4,SLC11A1,SLC40A1
	PTGER4	-0.375	G-protein coupled receptor	Activated	2.63	0.00346	CITED2,Ctla2a/Ctla2b,GBP6,GDNF,Mx1,S1PR1,Serpinb6b	51 (7)			CSF3	cytokine		0.853	0.00203	BCL2L1,C3AR1,CCND2,CEBPD,CX3CR1,GADD45G,GDNF,MCL1,PIM1
	MRTFA		transcription regulator	Activated	2.599	0.00209	ACTG1,AMOTL2,BCL2L1,HPGD,ITGA5,MAFK,S1PR1,SRF,Tpm4	19 (3)			Il3	cytokine		0.676	0.0153	BCL2L1,CCND2,MCL1,PIM1
	ANGPT2		growth factor	Activated	2.598	0.000436	ARL4C,CWC22,HSP90AA1,JMJD6,KLF5,LIG4,RCAN1,SOCS7,TNFRSF12A,TXNIP				IL3	cytokine		0.627	0.000417	AREG,BCL2L1,CCND2,CEBPG,CITED2,CREM,FOSL2,GADD45G,IL17RB,KLF13,MCL1,NEDD9,PIM1
	Creb		group	Activated	2.596	2.76e-06	AREG,BDNF,C3AR1,CEBPD,CREM,HES1,HPGD,MCAM,MCL1,NEDD9,NR4A2,NR4A3,PDE4B,PER1,RGS2,ULK1,ZNG1A	103 (9)			TNFSF10	cytokine		0.626	0.00175	BCL2L1,CD4,IL17RB,MCL1,PER1,RCAN1,TNFRSF10A
	bucladesine		chemical toxicant	Activated	2.582	4.76e-06	ADAMTS1,BDNF,C3AR1,CCR5,CREM,ERRFI1,FOSL2,GEM,IRF8,MCAM,NR4A2,NR4A3,PDE4B,PTGER4,Pvr,RGS2,SMIM3	134 (18)			IL4	cytokine		0.502	3.1e-07	ACTG1,AREG,ARID5A,BCL11A,BCL2L1,BDNF,CCND2,CCR1,CCR5,CITED2,Cmah,Ctla2a/Ctla2b,CXCL16,EPHA2,GADD45G,GBP6,HLX,HPGD,IL17RB,IRF8,KLF4,KLF6,KMO,LFNG,LIG4,MCL1,Mx1,NEDD9,NR4A3,PDE4B,PIM1,RASGEF1B,Serpinb6b,SH3BP2,SLC25A25,SP110,SPATA2,TFAP4,TNFAIP6
	BDNF	0.304	growth factor	Activated	2.558	0.000334	BCL2L1,BDNF,CCND2,DNAJB5,FRMD6,KLF10,KLF4,NR4A3,RAB3A,SPRY2,TRIB2,TRIM32,TXNIP	121 (16)			CX3CL1	cytokine		0.447	0.0117	ADAMTS1,ATF4,BCL2L1,Ctla2a/Ctla2b,CX3CR1,ID2
	NPM1		transcription regulator	Activated	2.53	3.94e-05	COL12A1,EGFL7,GEM,KLF10,KLF4,MYADM,RPS6KA2,S1PR2,SYDE1,TNFRSF25				IFNG	cytokine		0.437	1.49e-09	AREG,ATF4,BCL11A,BCL2L1,BDNF,CCND2,CCR1,CCR5,CD4,CEBPD,CELSR1,CREM,CX3CR1,CXCL16,CXCL17,ETS2,GBP6,GDNF,HAAO,HES1,HMGA1,HSP90AA1,HSP90AB1,ID2,IL17RB,IRF8,ITGA5,KLF10,KLF2,KLF4,KLF6,KMO,MAFK,Mx1,NEDD9,NR4A3,PIM1,S1PR1,S1PR2,SLC11A1,SLC40A1,SP110,TAB1,TFAP4,TNFAIP6,TNFRSF10A,TNFRSF12A,TRIB2,TSC22D3,TXNIP
	TCF7L2		transcription regulator	Activated	2.53	0.0467	CCND2,CD4,ID2,MCAM,PPP1R16B,RASGEF1B,SLC22A23,SNX18,SYDE2,TSPAN2				TNFSF11	cytokine		0.408	1.63e-05	BCL2L1,C3AR1,CCR1,CYP1A1,DUSP16,IRF8,ITGA5,PIM1,PTGER4,RCAN1,Serpinb6b,SPIB,TSPAN13,YWHAZ
	gentamicin		chemical drug	Activated	2.496	0.000503	CCNL1,CHKA,CITED2,CYP1A1,HSP90AA1,KLF6,KMO,LIG4,MAPK6,PPP1R10,Pvr,SEC22B,YWHAH				MIF	cytokine		0.391	0.0398	BCL2L1,C3AR1,CCR1,CCR5,CXCL16
	IL15		cytokine	Activated	2.483	0.00621	ATF4,BCL2L1,CCND2,CCR1,CX3CR1,HLX,KLF2,MCL1,MDC1,PDE4B,PIM1,S1PR1,TNFRSF25	127 (15)			IL33	cytokine		0.389	9.77e-05	ADAMTS1,AREG,BCL2L1,CCR1,CREM,Ctla2a/Ctla2b,CXCL16,FOSL2,ID2,IL17RB,ITGA5,KLF4,PTGER4,RPS6KA2,SLC11A1,TNFRSF25
	TNF		cytokine	Activated	2.463	1.65e-14	ATF4,BCL10,BCL2L1,BDNF,BTBD3,C3AR1,CCND2,CCR1,CCR5,CD4,CEBPD,CEBPG,CITED2,CREM,CX3CR1,CXCL16,CYP1A1,DUSP16,EFNA1,EGFL7,EPHA2,ETS2,FOSL2,FOXF1,FRMD6,GADD45G,GBP6,GDNF,GEM,HES1,HID1,HPGD,HSP90AB1,IL17RB,IRF8,ITGA5,KCNJ2,KLF10,KLF2,KLF4,KLF5,KLF6,KMO,LCAT,LFNG,MCAM,MCL1,Mx1,NEDD9,NR4A2,NR4A3,NRARP,PDE4B,PIM1,PTGER4,RABGEF1,RCAN1,RGS2,S1PR1,S1PR2,SEC22B,SLC11A1,SLC40A1,SNRK,SPRY2,TGFB1I1,TNFAIP6,TNFR…	147 (19)			CSF2	cytokine		0.387	0.00756	BCL2L1,CCND2,CCR1,CCR5,CD180,CX3CR1,ID2,MCL1,NR4A2,NR4A3,PDE4B,PIM1,PTGER4,TRIB2
	1,2-dithiol-3-thione		chemical reagent	Activated	2.446	0.0459	ACTG1,DSTN,DYNLL1,HSP90AA1,HSP90AB1,SEC23A				PRL	cytokine		0.351	1.17e-06	AREG,BCL2L1,CEBPD,CNN3,FILIP1L,HES1,ID2,NEDD9,PIM1,PRR15L,RCAN1,SP110,SRF,TNFRSF12A,TSC22D3,TSPAN13,TXNIP
	thapsigargin		chemical toxicant	Activated	2.427	0.000212	ATF4,BCL2L1,BDNF,CREM,ERRFI1,KLF4,MCL1,NR4A3,RCAN1,SESN2,TXNIP	132 (17)			WNT1	cytokine		0.254	0.0286	CCND2,ETS2,GADD45G,HES1,KLF5
	carbamazepine		chemical drug	Activated	2.425	5.32e-05	ATF4,BDNF,CEBPG,DNAJB1,MCL1,TNFRSF12A	25 (4)			LIF	cytokine		-0.082	0.00235	AREG,BCL2L1,CEBPD,FOXF1,HES1,ID2,KLF10,Nes,PIM1
	PGR		ligand-dependent nuclear receptor	Activated	2.417	0.00797	ADAMTS1,AREG,BCL2L1,CEBPD,COL12A1,DYNLL1,HES1,HPGD,KLF4,KLF5,NEDD9,SPRY2,TSC22D3	149 (21)			IL2	cytokine		-0.089	5.15e-06	AREG,BCL2L1,CCND2,CCR1,CCR5,CSRNP1,CX3CR1,CYP1A1,FOSL2,GADD45G,GEM,IL17RB,KLF13,KLF6,MCL1,NR4A3,PDCD11,PDE4B,PIM1,PTGIR,RASGEF1B,RGS2,SLC40A1,TNFRSF10A,TNFRSF12A,TRIB2
	PDGF BB		complex	Activated	2.403	1.15e-10	AREG,CCNL1,CEBPD,COL12A1,ETS2,GDNF,GEM,HES1,ITGA5,KLF10,KLF6,MAFK,MCL1,NR4A2,NR4A3,PIM1,Pvr,RGS2,S1PR2,SPRY2,SRF,TNFRSF12A,YWHAH	135 (19)			FLT3LG	cytokine		-0.283	0.0174	CCR5,ID2,IRF8,MCL1
	P38 MAPK		group	Activated	2.391	0.000115	BCL2L1,BDNF,CCND2,CEBPD,CYP1A1,IRX1,KLF13,KLF4,KLF5,MCL1,Nes,NR4A3,RCAN1,SRF,ULK1	142 (22)			IL21	cytokine		-0.294	0.0247	BCL2L1,CCND2,GBP6,HLX,ID2,MCL1
	IL17A		cytokine	Activated	2.368	0.0322	AREG,BCL2L1,CCR5,CEBPD,KLF2,MCL1,NR4A2,S1PR1,S1PR2				IL27	cytokine		-0.308	0.00269	CCND2,CEBPD,GADD45G,HPGD,ID2,MCL1,PIM1
	YAP1		transcription regulator	Activated	2.353	0.0457	ACTG1,ADAMTS1,AMOTL2,AREG,BCL2L1,CYP1A1,ID2,ITGA5,JMJD6,KLF5,SRF,TGFB1I1				CXCL8	cytokine		-0.314	0.0119	BCL2L1,COL12A1,ITGA5,KLF4,TNFRSF10A
	bee venom		chemical - endogenous non-mammalian	Activated	2.343	3.22e-09	AREG,Arf2,CCNL1,CREM,DNAJB1,ETS2,ITGA5,KLF2,KLF4,NR4A2,RCAN1,RGS2				CNTF	cytokine		-0.378	0.0183	C3AR1,CCR1,CCR5,CEBPD,KLF4,MCL1,SLC11A1
	metribolone		chemical reagent	Activated	2.343	0.0107	ADAMTS1,BCL2L1,C1orf116,CCR1,ERRFI1,GADD45G,IQGAP2,MYL12B,SLC38A2,SRF,TGM4,TXNIP,YWHAH				IL5	cytokine		-0.391	7.52e-07	AREG,ATF4,BCL2L1,CCND2,CCR1,CCR5,CITED2,CX3CR1,FOSL2,GADD45G,HLX,LFNG,MAPK6,MYADM,PDE4B,PIM1
	Ige		complex	Activated	2.309	0.000325	AREG,BCL2L1,CCND2,CCR5,CXCL16,DUSP3,ERRFI1,ITGA5,RPS6KA2,Serpinb6b,SLC11A1,TNFRSF10A,TNFRSF12A	138 (21)			IL10	cytokine		-1.145	0.000323	BCL2L1,CCND2,CCR1,CCR5,CX3CR1,CXCL16,ETS2,HPGD,IL17RB,MCL1,NEDD9,NR4A3,PAK1,PDE4B,SLC11A1,TSC22D3
	cyclic AMP		chemical - endogenous mammalian	Activated	2.254	0.00732	BDNF,CCND2,CEBPD,CREM,FOSL2,NR4A2,PDE4B,PER1,TXNIP	115 (15)			IL24	cytokine		-1.994	0.00337	BCL2L1,GADD45G,LIG4,MCL1
	HMG20A		transcription regulator	Activated	2.236	0.0132	ACTG1,ERRFI1,ITGA5,Pvr,TNFRSF12A
	tunicamycin		chemical - endogenous non-mammalian	Activated	2.233	0.0108	Arf2,ATF4,CEBPD,KLF4,MCL1,SEC22B,SESN2,TNFRSF10A,TXNIP
	CREM	0.291	transcription regulator	Activated	2.232	8.26e-07	CCND2,CREM,CSRNP1,ERRFI1,FRMD6,KLF5,MCL1,NR4A2,PER1,SERTAD1,SIAH2,SPTY2D1	96 (7)
	MAPK7		kinase	Activated	2.223	0.00451	ADAMTS1,BDNF,KLF2,KLF4,MCL1	81 (7)
	allopurinol		chemical drug	Activated	2.219	0.00775	ADAMTS1,BDNF,Pvr,TNFRSF12A,TXNIP	57 (7)
	MECP2		transcription regulator	Activated	2.219	0.0425	BDNF,LFNG,RASSF1,TSPAN13,TXNIP,YWHAZ
	PTH		other	Activated	2.203	0.00766	ADAMTS1,AREG,CREM,FOSL2,NR4A2,RGS2,SEC22B	108 (13)
	F2		peptidase	Activated	2.198	0.000754	CCND2,FOSL2,HMGA1,HSP90AA1,KLF6,NR4A3,RAB3A,RCAN1,SRF,TNFRSF12A,TSPAN32	135 (22)
	TGFA		growth factor	Activated	2.198	0.00369	AREG,BCL2L1,ERRFI1,FOSL2,NR4A2	142 (22)
	8-bromo-cAMP		chemical reagent	Activated	2.197	0.00616	ACTG1,BCL2L1,CCND2,CREM,HPGD,ID2,IQGAP2,MYL12B,Nes,PAK1,PDE4B,SPRY2,SPRY4,YWHAH	152 (18)
	TNFSF13B		cytokine	Activated	2.189	0.000548	BCL2L1,CCND2,CCR1,HPGD,MCL1,NR4A2,TNFAIP6,TNFRSF12A	136 (20)
	nelfinavir		chemical drug	Activated	2.186	7.3e-06	APOBR,ATF4,CEBPG,KLF4,SESN2,STK40,TSC22D3,ULK1
	MYD88		other	Activated	2.178	0.00118	ARID3A,ATF4,BCL10,CEBPD,ETS2,HSP90AB1,IRF8,Nes,PDE4B,PIM1,SH3BP2,TNFRSF12A	147 (20)
	PRKCD		kinase	Activated	2.172	2.9e-05	BCL2L1,CD4,CXCL16,ETS2,FOSL2,GEM,KLF5,KLF6,MCL1,PPP1R3D,RCAN1	141 (18)
	SRC		kinase	Activated	2.172	0.0222	BCL2L1,CCND2,CYP1A1,MCL1,SRF
	TGFB1		growth factor	Activated	2.14	2.26e-11	AMOTL2,AREG,ATF4,BCL2L1,BDNF,C3AR1,CCND2,CCR1,CCR5,CD4,CEBPD,CITED2,CNN3,COL12A1,CX3CR1,CYP1A1,DNAJA1,DYNLL1,EPHA2,FILIP1L,FOSL2,GDNF,GEM,HES1,HMGA1,HPGD,HSP90AA1,ID2,IL17RB,IRF8,ITGA5,KLF10,KLF2,KLF4,LCAT,MAPK6,MCL1,Mx1,NEDD9,NR4A2,NR4A3,PI4K2B,PIM1,PTGER4,RASGEF1B,RASSF1,S1PR1,S1PR2,SAR1A,SERTAD1,SRF,TAX1BP3,TFAP4,TGFB1I1,TNFAIP6,TNFRSF10A,TNFRSF12A,Tpm4,TSC22D3,TXNIP,ULK1,YWHAZ,ZFP36L2	145 (20)
	KAT5		transcription regulator	Activated	2.121	0.000867	ADAMTS1,CCND2,CHKA,ERLIN1,MEX3A,MEX3C,SRF,YWHAH,YWHAZ
	Mek		group	Activated	2.116	0.0113	B4GALT3,BCL2L1,CCND2,EPHA2,ID2,MCL1,Pvr,SPRY2,SPRY4,TSPAN13
	NRG1		growth factor	Activated	2.099	3.71e-07	AMOTL2,ATF4,BCL2L1,BDNF,CCND2,EPHA2,ERRFI1,HES1,HMGA1,MCL1,NR4A3,RAB3A,TNFAIP1,TNFRSF25,TOB2,ZFP36L2	126 (20)
	NFE2L2		transcription regulator	Activated	2.076	0.0088	ACTG1,ADAMTS1,ATF4,BCL2L1,BDNF,CYP1A1,DNAJB5,DSTN,DYNLL1,GADD45G,HSP90AA1,HSP90AB1,OSGIN1,SEC23A
	CD3		complex	Activated	2.044	0.0011	ATF4,BCL2L1,CCND2,CCR1,CCR5,CD4,CLK1,CREM,ETS2,HSP90AA1,IRF8,ORAI2,PDE4B,POLR2A,PTGER4,SEC14L1,TNFRSF25,TOB2	131 (18)
	AGT		growth factor	Activated	2.03	0.000478	AREG,ARID3A,BDNF,CCND2,CCR5,COL12A1,CREM,CX3CR1,EDARADD,ENPEP,ERRFI1,HES1,ITGA5,KCNJ2,KLF4,KLF5,Nes,NR4A2,RCAN1,RGS2,SLC10A6,SPRY2,TGFB1I1,TNFRSF12A,TXNIP	136 (17)
	lipoteichoic acid		chemical - endogenous non-mammalian	Activated	2	0.00198	BCL2L1,CCR1,CCR5,NR4A2,NR4A3	127 (19)
	bafilomycin A1		chemical drug	Activated	2	0.0061	BCL2L1,HSP90AA1,HSP90AB1,TNFRSF10A	117 (12)
	TCF20		transcription regulator	Activated	2	0.00952	LFNG,TSPAN13,TXNIP,YWHAZ
	5-O-mycolyl-beta-araf-(1->2)-5-O-mycolyl-alpha-araf-(1->1')-glycerol		chemical - endogenous non-mammalian	Activated	2	0.0212	CX3CR1,NR4A3,PDE4B,RCAN1
	CTNNB1		transcription regulator		1.987	0.0196	BCL2L1,BDNF,CCND2,CD4,CELSR1,CYP1A1,GADD45G,GDNF,HES1,ID2,IRF8,KLF5,LFNG,LIG4,MCL1,Nes,PDE4B,POLR2A,RAB3A,SPRY4,TOB2
	CRNDE		other		1.982	0.00161	BCL2L1,DUSP8,EPHA2,MCL1
	ATG5		other		1.982	0.0324	DYNLL1,RCAN1,SLC40A1,TNFRSF25
	Pdgf (complex)		complex		1.98	0.0367	CCND2,ERRFI1,ITGA5,NR4A2
	MET		kinase		1.976	0.00197	AREG,ARID5A,CCND2,CITED2,HLX,KLF4,PIM1	90 (11)
	Fgf		group		1.973	0.000705	PER1,Pvr,SPRY2,SPRY4
	SHH		peptidase		1.966	0.0115	ADAMTS1,CCND2,FOXF1,GDNF,HMGA1,LFNG,TSC22D3
	GAST		other		1.964	0.00429	AREG,ATF4,CREM,DNAJA1,HES1	76 (4)
	TLR2		transmembrane receptor		1.964	0.0121	BDNF,CCR1,CCR5,CEBPD,GDNF,KLF2,SLC40A1
	MAP2K1/2		group		1.963	0.0166	BDNF,CCND2,KLF5,MCL1
	lysophosphatidic acid		chemical - other		1.961	0.0402	AREG,GDNF,KLF5,SRF
	fluoxetine		chemical drug		1.956	0.0204	BCL2L1,BDNF,GDNF,PDE4B
	G protein alpha i		group		1.941	4.08e-06	ADAMTS1,CEBPD,FOSL2,GBP6,GEM,KLF4,NR4A3,TNFRSF12A
	25-hydroxycholesterol		chemical reagent		1.929	0.0153	ATF4,FOSL2,NR4A2,NR4A3
	lovastatin		chemical drug		1.915	0.000625	ADAMTS1,ATF4,BCL2L1,BDNF,GDNF,KLF2,KLF4,MCL1	135 (18)
	CALCA		other		1.915	0.00702	CREM,Ctla2a/Ctla2b,FOSL2,ID2,IL17RB,PTGER4,SEC22B
	PDX1		transcription regulator		1.914	0.000778	ACTG1,ATF4,CREM,EFNA1,ID2,KLF10,KLF6,PDE4B,TXNIP
	KLF4	1.025	transcription regulator		1.914	0.00121	ADAMTS1,BCL2L1,CCND2,CYP1A1,EPHA2,FOXF1,HES1,IER5,KLF4,KLF5,RCAN1,TFAP4
	ADCYAP1		other		1.914	0.0296	B4GALT3,BDNF,CEBPD,CNN3,EPHA2,MCAM,TGM4
	FOXO1		transcription regulator		1.901	0.0203	ATF4,CEBPD,CITED2,ENPEP,HSP90AB1,KLF2,KLF4,PAK1,S1PR1,SLC25A25,SPRY2,TXNIP
	GPR174		G-protein coupled receptor		1.89	0.000278	ARID5A,CD180,CREM,ETS2,PDE4B,PPP1R16B,RGS2
	REL		transcription regulator		1.841	0.00367	BCL2L1,CCND2,CREM,CRKL,EDARADD,IRF8,NR4A3,NRARP,TNFRSF10A	76 (7)
	CG		complex		1.83	7.02e-07	ADAMTS1,AREG,ATF4,BCL2L1,BDNF,CCND2,CEBPD,CREM,FILIP1L,FOSL2,GBP6,HMGA1,HPGD,ID2,IL17RB,KLF4,MCAM,MCL1,RGS2,SPRY2,TNFAIP6,TNFRSF12A,TSPAN13	115 (17)
	D-glucose		chemical - endogenous mammalian		1.778	0.0187	ATF4,BCL2L1,CCND2,CREM,DYNLL1,ITGA5,KIF5C,KLF10,MCAM,MCL1,NR4A2,NR4A3,RGS2,TNFRSF25,TSPAN2,TXNIP,ULK1
	FGF2		growth factor		1.777	2.11e-06	AREG,ATF4,BCL2L1,BDNF,CCND2,ERRFI1,GDNF,HES1,HMGA1,ID2,ITGA5,MCAM,Nes,NR4A2,Pvr,SMIM3,SPRY2,SPRY4,TNFRSF12A,YWHAH,YWHAZ	144 (21)
	MAPK1		kinase		1.769	0.0239	BCL11A,BDNF,FOSL2,ITGA5,MCL1,RGS2,SP110,SPRY2,SPRY4,SRF
	STAT6		transcription regulator		1.767	0.00106	ADAM11,AREG,ARID5A,BCL2L1,CCND2,CCR5,Cmah,EPHA2,GADD45G,GBP6,HLX,KMO,Mx1,NEDD9,SLC25A25	106 (17)
	CD40LG		cytokine		1.759	0.00163	BCL2L1,CCR1,CCR5,FOSL2,HSP90AA1,ID2,LIG4,MCL1,NR4A3,PIM1,RGS2,TFAP4,TNFAIP6	126 (22)
	kainic acid		chemical toxicant		1.756	3.97e-06	ATF4,BCL2L1,BDNF,CREM,CSRNP1,ERRFI1,FOSL2,GDNF,NR4A2,PER1,RGS2,SPTY2D1	131 (18)
	lipopolysaccharide		chemical drug		1.742	1.3e-12	ADAMTS1,APOBR,AREG,Arf2,ARL4C,ATF4,BCL10,BCL2L1,BDNF,C3AR1,CCDC88B,CCND2,CCNL1,CCR1,CCR5,CD180,CD4,CEBPD,CITED2,COL12A1,CREM,CX3CR1,CXCL16,CYP1A1,DNAJB1,DUSP16,DUSP8,EGFL7,ETS2,GADD45G,GBP6,GEM,HES1,HMGA1,HPGD,HSP90AA1,ID2,IER5,IRF8,ITGA5,JMJD6,KIF5C,KLF10,KLF2,KLF4,KLF6,KMO,LIG4,MAPK6,MCL1,MTF1,Mx1,NR4A2,NR4A3,NRARP,PAK1,PDE4B,PIM1,PPP1R16B,PTGER4,RASGEF1B,RCAN1,RESF1,RGS2,S1PR1,S1PR2,SIAH2,SLC1…	155 (17)
	TEAD4		transcription regulator		1.732	0.0173	AMOTL2,FILIP1L,MTMR10,RCAN1,TFAP4
	NUPR1		transcription regulator		1.732	0.0287	AREG,CITED2,DUSP8,KLF4,KLF6,Nes,PIM1,RTN4IP1,SESN2,SRF,TEP1,TRIM16
	memantine		chemical drug		1.724	0.00323	BCL2L1,BDNF,CREM,HSP90AB1,PAK1,PPP2CB	92 (7)
	Pam3-Cys-Ser-Lys4		chemical reagent		1.718	0.00693	BCL2L1,CCR1,CCR5,CD180,MCL1,Pvr,RGS2,SLC40A1	102 (17)
	ATF4	0.178	transcription regulator		1.709	1.29e-05	AREG,ATF4,BCL11A,CEBPG,KLF4,MCL1,SESN2,SH3BP2,SH3RF3,SLC38A2,STK40,TNFRSF12A	31 (3)
	bicuculline		chemical - endogenous non-mammalian		1.709	9.68e-05	BDNF,GADD45G,KLF4,NR4A2,SIAH2,SPTY2D1	8 (2)
	bisphenol A		chemical - endogenous mammalian		1.709	0.017	CITED2,HSP90AB1,NR4A2,NR4A3,PER1,PPP1R10,ULK1
	Tnf (family)		group		1.706	0.0207	BCL2L1,C3AR1,CCR1,CCR5,CD4,CYP1A1,SP110,TNFAIP6
	ethanol		chemical - endogenous mammalian		1.678	0.00146	ATF4,BCL2L1,BDNF,C3AR1,CEBPD,FOSL2,HSP90AB1,IQGAP2,KLF4,KLF6,SAR1A,SEC23A,SLC40A1,SOX18,TNFAIP6,TSC22D3	126 (15)
	CBFB		transcription regulator		1.664	0.000834	ARL4C,ATF4,CCR5,CD4,PTGER4,SOCS5
	MKNK1		kinase		1.664	0.00702	ID2,KLF13,NR4A3,RAB3A,SPRY2,TRIM32,TXNIP
	HRAS		enzyme		1.653	1.21e-09	ACTG1,AMOTL2,AREG,B4GALT3,BCL2L1,CCND2,CEBPD,CYP1A1,FOSL2,FRMD6,GADD45G,GNB1,HES1,HSP90AA1,ID2,IQGAP2,ITGA5,KLF5,KLF6,MCAM,Pvr,RPS6KA2,SPRY2,SPRY4,SRF,TGFB1I1,TMOD2,TNFRSF10A,Tpm4,WSB2,ZNF217	120 (14)
	ADRB		group		1.648	0.000417	ATOSA,BCL10,BDNF,CREM,KLF4,NR4A2,NR4A3,SLC40A1	108 (12)
	STIM1		ion channel		1.633	2.53e-05	ATF4,BCL2L1,ITGA5,KLF10,KLF2,KLF4,SRF	103 (7)
	aldosterone		chemical - endogenous mammalian		1.621	0.0311	ADAMTS1,BDNF,Ctla2a/Ctla2b,PER1,RGS2,TSC22D3
	IL6		cytokine		1.599	2.63e-08	ADAMTS1,AREG,ARL4C,BCL2L1,BDNF,CCR1,CCR5,CEBPD,CX3CR1,CYP1A1,DUSP16,ERRFI1,ETS2,GADD45G,HPGD,ID2,IRF8,LCAT,MCL1,PIM1,PTGER4,Pvr,RASSF1,RNASE6,S1PR1,S1PR2,SLC40A1,SMIM3,SOCS5,SP110,TNFRSF12A,TNFRSF25	143 (19)
	Lh		complex		1.573	8.44e-06	ADAMTS1,AREG,ARL4C,BDNF,CCND2,DUSP3,GADD45G,GEM,GNB1,JMJD6,MAPK6,MCL1,PER1,RGS2,TNFAIP6,TNFRSF12A	154 (20)
	LDL		complex		1.569	0.0127	BCL2L1,CREM,CX3CR1,KLF6,MCL1,NR4A2,NR4A3,RCAN1,TNFAIP6
	Calcineurin protein(s)		complex		1.552	0.000288	BDNF,NR4A2,NR4A3,RCAN1,RGS2,TSG101	110 (14)
	TP73		transcription regulator		1.534	0.000626	CITED2,CNN3,EPHA2,FOXF1,HES1,ID2,ITGA5,KLF5,Pvr,Serpinb6b,SNRK,SRF,TNFRSF10A,TNFRSF12A,TRIM32,ULK1	111 (14)
	cigarette smoke		chemical toxicant		1.532	0.0242	AREG,ATF4,BCL2L1,CYP1A1,DNAJB5,GADD45G,KLF4
	ionomycin		chemical reagent		1.525	4.82e-05	BCL2L1,BDNF,CCND2,CD4,ETS2,GEM,KCNJ2,NR4A2,PIM1,RCAN1,RGS2	142 (20)
	PI3K (complex)		complex		1.521	0.000375	ATF4,BCL2L1,CCND2,CCR1,KLF2,MCAM,MCL1,NR4A2,PIM1,RGS2,TNFRSF10A,TXNIP	132 (16)
	salmonella minnesota R595 lipopolysaccharides		chemical - endogenous non-mammalian		1.521	0.0173	CEBPD,ETS2,IRF8,Nes,PDE4B
	EIF4E		translation regulator		1.519	0.000136	BCL2L1,C3AR1,CCR5,CX3CR1,CXCL16,KLF13,MCL1,PIM1,SERTAD1,SLC11A1,TNFRSF10A
	JUN		transcription regulator		1.513	0.0132	BCL2L1,BDNF,C3AR1,CCND2,CXCL16,GDNF,HES1,HMGA1,HPGD,ID2,PIM1,SLC38A2,TNFRSF10A
	dexamethasone		chemical drug		1.511	2.12e-09	ACTG1,ADAMTS1,AREG,ARL4C,ATF4,BCL2L1,BDNF,C3AR1,CCND2,CCR1,CEBPD,CNN3,CX3CR1,CYP1A1,DUSP16,EDARADD,EFNA1,ERLIN1,ERRFI1,ETS2,FILIP1L,FOSL2,GEM,HES1,HMGA1,HPGD,ID2,IL17RB,IRF8,ITGA5,KLF10,KLF13,KLF4,KLF5,KLF6,LRRC8A,MAPK6,MCL1,NEDD9,NR4A3,PDE4B,PER1,PIM1,POLR2A,PRR15L,PTGER4,RCAN1,RGS2,RPS6KA2,S1PR1,SEC14L1,SEC22B,SLC10A6,SLC40A1,SPIB,SRF,TFAP4,TNFAIP6,TNFRSF10A,TNFRSF25,TRPM2,TSC22D3,TSPAN2,TXNIP,…	150 (17)
	cocaine		chemical drug		1.511	3.34e-05	BDNF,CCR5,DYNLL1,FRMD6,GNB1,KLF5,MCL1,NR4A3,PER1,SERTAD1,SIAH2	113 (15)
	decitabine		chemical drug		1.503	0.000431	ADAMTS1,BCL11A,BDNF,CCND2,CX3CR1,CYP1A1,FILIP1L,GADD45G,HPGD,IRX1,KIF5C,KLF4,KLF6,NR4A2,NR4A3,PAK1,POLR2A,RAB3A,RASSF1,RPS6KA2,SIAH2,TFAP4,TNFRSF10A,TNFRSF25,ULK1	124 (15)
	EPO		cytokine		1.491	0.00608	APOBR,BCL2L1,BDNF,CCND2,ID2,MCL1,PIM1,SEC22B,TSC22D3,TXNIP	112 (19)
	eicosapentenoic acid		chemical drug		1.491	0.00876	BCL2L1,BDNF,CCR5,CEBPD,GDNF	123 (17)
	GATA1		transcription regulator		1.486	8.56e-05	ARHGAP4,BCL2L1,CCND2,CCR1,CCR5,CNN3,CREM,ETS2,IRF8,NR4A2,NRARP,PIM1,TGFB1I1	89 (11)
	STAT3		transcription regulator		1.485	0.00061	AREG,BCL2L1,CCND2,CCR1,CCR5,CEBPD,CX3CR1,GADD45G,GBP6,ID2,ITGA5,KLF2,KLF4,KLF5,LCAT,MCL1,Mx1,NR4A2,PIM1,S1PR1,Serpinb6b,SP110	150 (23)
	VEGFA		growth factor		1.485	0.00595	ADAMTS1,BCL6B,CITED2,ETS2,HES1,HLX,MCL1,NR4A2,PIM1,RCAN1	115 (16)
	medroxyprogesterone acetate		chemical drug		1.477	0.00112	ACTG1,ADAMTS1,BCL2L1,BDNF,CCND2,CCR5,CYP1A1,ID2,IQGAP2,KLF5,MYL12B,PAK1,SPRY2,SPRY4,YWHAH	154 (22)
	EGFR		kinase		1.463	0.000393	AMOTL2,AREG,B4GALT3,BCL2L1,CHKA,CLK1,EPHA2,FOSL2,HMGA1,IQGAP2,MCAM,MCL1,PTGER4,SPRY2,TGFB1I1,TNFAIP6,TSPAN13,TXNIP	142 (22)
	4-hydroxytamoxifen		chemical drug		1.456	2.05e-05	AREG,BCL2L1,CEBPD,CYP1A1,DYNLL1,ERRFI1,FOSL2,NEDD9,NR4A2,PTGER4,TRIM16	121 (13)
	pioglitazone		chemical drug		1.455	0.04	ATF4,CEBPD,CITED2,HPGD,KLF4,NR4A3
	IGF1		growth factor		1.448	8.84e-05	BCL2L1,BDNF,CCND2,CEBPD,CITED2,ERRFI1,GADD45G,GDNF,HMGA1,ID2,ITGA5,KLF6,MCL1,PIM1,PTGER4,SEC23A,SLC25A25,TNFRSF12A,TXNIP,ZFP36L2	162 (21)
	Vegf		group		1.436	0.000116	ADAMTS1,BTBD3,CELSR1,Ctla2a/Ctla2b,EFNA1,FRMD6,GEM,HES1,HID1,MCL1,NR4A2,NR4A3,NRARP,RCAN1,RGS2,SNRK,TRIB2,YWHAZ	95 (8)
	RAC1		enzyme		1.432	0.0249	BCL2L1,KLF4,MCL1,PAK1,SRF
	IL1A		cytokine		1.432	0.042	ADAMTS1,BCL2L1,CYP1A1,HSP90AA1,HSP90AB1,ITGA5,MCAM
	CMTM3		cytokine		1.414	1.6e-05	AMOTL2,DNAJA1,DNAJB1,HSP90AA1,HSP90AB1,IER5,RASSF1,SESN2
	COPS5		transcription regulator		1.414	0.0121	EPHA2,HMGA1,IER5,NUP107,PDE4B,POLR2A,TXNIP,VWA5A
	N-[N-(3,5-difluorophenacetyl-L-Ala)]-S-phenylglycine t-butyl ester		chemical - protease inhibitor		1.413	0.0279	BCL2L1,ETS2,HES1,ITGA5,TNFRSF12A
	GAPDH		enzyme		1.4	0.000163	BCL2L1,GEM,SLC38A2,TGFB1I1,TXNIP
	ERK		group		1.393	7.13e-05	AREG,BCL2L1,CCR1,CEBPD,CYP1A1,EPHA2,FOSL2,HMGA1,KLF10,KLF5,MCAM,MCL1	139 (19)
	INHBA		growth factor		1.39	0.00608	BCL2L1,CCND2,ETS2,IRX1,KLF13,KLF4,MCL1,NR4A2	120 (18)
	dalfampridine		chemical drug		1.387	0.000942	GADD45G,KLF4,NR4A2,SIAH2,SPTY2D1
	IRF2BP2		transcription regulator		1.387	0.0249	CCR1,CD180,GBP6,ID2,NR4A3
	IRF8	-0.279	transcription regulator		1.385	0.00334	BCL2L1,CD4,CREM,CXCL16,IRF8,KLF4,KLF6,SOCS7	134 (17)
	IL7		cytokine		1.383	0.0104	BCL2L1,CCND2,KLF2,MCL1,PIM1,S1PR1
	ETV6-RUNX1		fusion gene/product		1.382	2.4e-06	ARHGAP4,BCL11A,DSTN,ID2,IRF8,KCNJ2,KIF5C,KLF6,Mx1,PAK1,PDE4B,PIM1,SMIM3,SPIB,TNFRSF10A,TSC22D3
	Salmonella enterica serotype abortus equi lipopolysaccharide		chemical toxicant		1.373	5.08e-05	AREG,ETS2,GEM,HES1,ID2,KCNJ2,NR4A2,OSGIN1,PLEKHF2,SIAH2
	BCR (complex)		complex		1.367	0.000517	BCL2L1,CCND2,FOSL2,IRF8,KLF4,LFNG,MCL1,PIM1,S1PR1,SLC38A2,TNFRSF25,ZNF217	136 (20)
	ADORA2A		G-protein coupled receptor		1.362	0.00175	B4GALT3,BDNF,DSTN,NR4A2,NR4A3,RAB3A,TSC22D3	108 (11)
	NFKBIA		transcription regulator		1.36	0.000674	BCL11A,BCL2L1,CCND2,CCR1,CEBPD,GADD45G,HES1,HMGA1,KLF5,MEX3A,PIM1,RCAN1,TGFB1I1,TNFRSF10A,YWHAZ	136 (19)
	GLI3		transcription regulator		1.348	8.26e-05	CCND2,FOXF1,KLF13,KLF2,OSR1,SPRY2,SRF,TNFRSF10A
	DDB1		other		1.342	4.98e-05	CEBPD,DNAJB1,ID2,KLF5,SRF
	dinoprost		chemical - endogenous mammalian		1.342	0.000385	CCND2,FOSL2,ID2,MAPK6,NR4A2,YWHAZ	114 (11)
	GPER1		G-protein coupled receptor		1.342	0.00135	AREG,CEBPD,ERRFI1,NR4A2,PTGER4	143 (12)
	methylmercury		chemical toxicant		1.342	0.00135	BCL2L1,CITED2,CYP1A1,ID2,TXNIP
	MAPK3		kinase		1.342	0.0102	FOSL2,MCL1,RGS2,SRF,TNFRSF10A
	SLC15A4		transporter		1.342	0.0264	ADAMTS1,FILIP1L,Mx1,TNFAIP6,Tpm4
	TICAM1		other		1.342	0.037	CEBPD,ETS2,Mx1,Nes,PDE4B
	TP63		transcription regulator		1.329	2.79e-05	ADAMTS1,AREG,BCL2L1,CCND2,CCR1,CITED2,CXCL17,DNAJB1,EPHA2,FOSL2,FOXF1,HES1,HSP90AA1,KLF4,KLF6,MDC1,PAK1,S1PR1,SESN2,TNFRSF10A,ULK1	126 (18)
	olanzapine		chemical drug		1.329	0.00775	BDNF,NR4A2,NR4A3,RGS2,SPRY2	30 (3)
	IL18		cytokine		1.316	0.00377	BCL2L1,CCR5,CX3CR1,CXCL16,FOSL2,GADD45G,HLX,TNFRSF25	140 (18)
	bortezomib		chemical drug		1.283	2.98e-05	ATF4,BCL2L1,CCND2,CDR2,CEBPD,DNAJA1,DNAJB1,HSP90AA1,MAPK6,MCL1,SH3BP2,TNFRSF10A,TSC22D3	116 (17)
	SOX2		transcription regulator		1.271	2.62e-05	BCL2L1,CITED2,EPHA2,ETS2,FOXF1,ID2,IER5,KLF4,KLF6,MTMR10,Nes,NRARP,RASGEF1B,RCAN1,SNX18,SPRY4,TET2,TFAP4,TSPAN2	96 (8)
	EDN1		cytokine		1.27	0.0486	AREG,ERRFI1,ITGA5,MCAM,PTGER4,RAB3A
	CCL5		cytokine		1.264	0.00298	ATF4,BDNF,CCR1,CCR5,HMGA1	74 (8)
	NGF		growth factor		1.251	1.46e-06	BCL2L1,BDNF,CITED2,DUSP8,ERRFI1,FOSL2,GADD45G,KLF4,MAFK,MCL1,Pvr,S1PR2,SLC40A1,SMIM3,TNFRSF12A	136 (17)
	torkinib		chemical drug		1.238	0.00199	ADAMTS1,KLF5,KLF6,NR4A2,NR4A3,PIM1,SPRY2,TXNIP
	Wy 40905		chemical reagent		1.231	0.00198	CREM,KLF4,KLF6,PER1,RGS2
	CITED2	-0.405	transcription regulator		1.23	0.0227	GBP6,IRF8,KIF5C,KLF6,MAPK6,PIM1,SLC38A2
	PRDM1		transcription regulator		1.23	0.0326	BCL11A,CADPS2,DUSP16,ID2,IRF8,MCL1,SPIB,TNFAIP6
	TP53		transcription regulator		1.226	1.55e-08	AMOTL2,AREG,ATF4,BCL2L1,BCL6B,BDNF,CCND2,CCNL1,CEBPD,CELSR1,CITED2,CNN3,CYP1A1,DNAJB5,DSTN,DYNLL1,EFNA1,EPHA2,FOXF1,GADD45G,HES1,HMGA1,HSP90AA1,HSP90AB1,ID2,IER5,INKA2,IRF8,KCNJ2,KLF4,KLF5,KLF6,MAPK6,MCAM,MCL1,Mx1,NR4A3,NRARP,ORAI2,OSGIN1,PAK1,PDE4B,PIM1,RPS6KA2,SESN2,SNRK,SRF,TET2,TGFB1I1,TNFRSF10A,Tpm4,TSC22D3,TSG101,ULK1,WSB2,YWHAH,YWHAZ	140 (18)
	CSF1		cytokine		1.22	0.00199	BCL2L1,CCND2,CCR1,CCR5,CX3CR1,ETS2,HPGD,ID2,IRF8,ITGA5,KLF2,SP110	131 (19)
	camptothecin		chemical drug		1.212	1.79e-06	AREG,BCL11A,BCL2L1,CCR1,CYTH2,DNAJA1,GADD45G,HSP90AA1,HSP90AB1,IER5,IQGAP2,JMJD6,MCL1,MEPCE,NR4A2,PPP1R3D,PTGER4,SIAH2,SMG8,SPRY2,TNFAIP1,TNFAIP6,TNFRSF10A,ULK1	114 (14)
	PIK3R1		kinase		1.195	0.0237	ATF4,BCL2L1,CCND2,TXNIP
	TAFAZZIN		enzyme		1.195	0.0241	ADAMTS1,AMOTL2,BDNF,CD180,HSP90AA1,KLF6,S1PR1,SLC40A1,TSC22D3
	HSF1		transcription regulator		1.182	0.00165	BCL10,BCL2L1,CCDC117,CELSR1,DNAJA1,DNAJB1,HSP90AA1,HSP90AB1,JMJD6,MCL1
	STAT4		transcription regulator		1.18	0.000638	ATF4,BCL2L1,CCR5,Ctla2a/Ctla2b,ERRFI1,GADD45G,Mx1,PER1,RASSF1,SERTAD1	90 (13)
	NR3C1		ligand-dependent nuclear receptor		1.178	1.19e-11	BCL10,BCL2L1,BDNF,CCR1,CCR5,CEBPD,CSRNP1,CSRNP2,CX3CR1,DUSP16,DYNLL1,EFNA1,ERRFI1,GEM,HSP90AB1,IRF8,JMJD6,KLF13,LRRC8A,MCL1,Mx1,NEDD9,PAK1,PDE4B,PER1,PLEKHF1,RGS2,SIAH2,TNFAIP1,TNFAIP6,TNFRSF10A,TNFRSF12A,TNFRSF25,TSC22D3,YWHAH,YWHAZ	166 (20)
	EIF2AK2		kinase		1.172	0.00169	ATF4,BCL2L1,BDNF,CEBPD,Mx1,NEDD9	132 (18)
	Irgm1		enzyme		1.165	0.0356	CXCL16,GBP6,ID2,Mx1
	APC		enzyme		1.163	0.00206	AREG,CCND2,COL12A1,HES1,ID2,KLF4,LFNG,TNFRSF12A	51 (7)
	SMARCA5		transcription regulator		1.155	7.38e-08	CCND2,CELSR1,EPHA2,ETS2,GBP6,HES1,IL17RB,LFNG,OSGIN1,RPS6KA2,SPIB,TSPAN32
	CHUK		kinase		1.153	0.0178	BCL2L1,CCR1,CEBPD,HSP90AA1,KLF10,KLF5,RCAN1
	KLF6	0.371	transcription regulator		1.147	0.00069	BCL2L1,CCNL1,CCR1,CYP1A1,ETS2,ID2,ITGA5,KLF10,MCL1,PDE4B,PIM1	99 (12)
	T-5224		chemical reagent		1.134	0.000639	ADAMTS1,AREG,ATF4,BDNF,FILIP1L,ID2,RGS2
	TET2	-0.197	enzyme		1.134	0.00387	APOBR,CCND2,FOSL2,I730030J21Rik,KLF2,RPS6KA2,SEC14L1,TRIB2,YWHAZ
	ammonium		chemical - endogenous mammalian		1.134	0.0121	APOBR,CCDC88C,DYNLL1,EPHA2,PTGER4,SESN2,SLC38A2
	CREBBP		transcription regulator		1.131	5.76e-05	ARID5A,CCND2,CCR5,CNN3,EDARADD,FOSL2,KLF2,KMO,LIG4,NR4A2,NR4A3,PIM1,PLEKHF1,RGS2,TNFAIP1,ZFP36L2	87 (13)
	N-[(2Z)-3-(4,5-dihydro-1,3-thiazol-2-yl)-1,3-thiazolidin-2-yl idene]-5H dibenzo[a,d][7]annulen-5-amine		chemical reagent		1.131	0.0188	CEBPG,CREM,NR4A3,YWHAZ
	EIF2AK3		kinase		1.122	2.17e-05	Arf2,ATF4,BDNF,CEBPG,ETS2,KLF4,RPS6KA2,SEC22B,SIAH2,TXNIP	24 (3)
	MAP2K1		kinase		1.091	0.0268	AREG,BCL2L1,ERRFI1,ITGA5,PIM1,TNFRSF10A,TNFRSF12A
	daidzein		chemical drug		1.091	0.0345	BDNF,CD4,CYP1A1,ID2
	arsenite		chemical toxicant		1.086	0.0147	ATF4,CYP1A1,KLF2,MCL1,SLC38A2
	SB 216763		chemical drug		1.067	0.00388	NR4A2,NR4A3,RGS2,SRF	114 (14)
	NPY		other		1.067	0.00857	BDNF,NUP107,PER1,RCAN1	53 (8)
	S100A8		other		1.066	0.000108	ADAMTS1,AREG,BCL2L1,CLEC9A,EFNA1,NR4A3,PER1,RNASE6,SOCS7,TXNIP	135 (19)
	S100A9		other		1.066	0.000302	ADAMTS1,AREG,CLEC9A,EFNA1,NR4A3,PER1,RNASE6,SOCS7,TXNIP
	CpG ODN 2006		chemical reagent		1.066	0.00552	ACTG1,BCL2L1,CCND2,HSP90AA1,HSP90AB1,PDE4B,PIM1,TNFAIP6,ZFP36L2	137 (17)
	KRAS		enzyme		1.054	0.0229	ADAMTS1,AREG,BCL2L1,CHSY1,COL12A1,EFNA1,EPHA2,GDNF,HES1,HMGA1,IQGAP2,KLF6,MCAM,PAK1,PDE4B,PIM1,Pvr,SPRY2,TNFRSF10A,TNFRSF12A,TXNIP
	progesterone		chemical - endogenous mammalian		1.046	0.00043	ACRBP,ADAMTS1,AREG,ARID5A,BCL2L1,BDNF,CCR5,CEBPD,CITED2,COL12A1,CYP1A1,EFNA1,ENPEP,ERRFI1,ITGA5,KLF10,KLF5,NEDD9,OSGIN1,PTGER4	142 (18)
	THPO		cytokine		1.044	0.039	BCL2L1,CCND2,KLF4,PIM1
	SP1		transcription regulator		1.04	0.0112	ADAMTS1,BDNF,CCND2,CEBPD,CITED2,CREM,HES1,HMGA1,KLF4,KLF6,LCAT,MCL1,PIM1,PTGER4,SLC11A1
	sodium bisulfide		chemical reagent		1.025	0.0061	BDNF,CX3CR1,HSP90AB1,SESN2
	SRF	0.345	transcription regulator		1.003	0.0029	ACTG1,BCL2L1,CEBPD,Cmah,DSTN,FILIP1L,GADD45G,MCL1,NR4A2,SRF,TGFB1I1,Tpm4	19 (3)
	IDR-1002		chemical reagent		1	0.000553	C3AR1,ITGA5,PTGIR,SLC11A1
	amphetamine		chemical drug		1	0.000696	ATF4,BCL2L1,BDNF,FOSL2,GNB1,RGS2
	MNT		transcription regulator		1	0.000748	CCND2,CXCL17,KLF10,KLF6,TXNIP
	ELF4		transcription regulator		1	0.00161	CREM,KLF2,KLF4,RCAN1
	trichloroethylene		chemical toxicant		1	0.00574	BCL2L1,CITED2,ID2,TXNIP
	benzene		chemical toxicant		1	0.00574	BCL2L1,CITED2,ID2,TXNIP
	prexasertib		chemical drug		1	0.014	CSRNP1,KLF4,NR4A3,TXNIP
	DSCAM		other		1	0.0303	ARHGAP4,GADD45G,KCNJ2,KLF4
	FOXA1		transcription regulator		1	0.032	CITED2,FOSL2,NR4A2,RASSF1,SIAH2,SLC10A6,TNFRSF12A
	RGS2	-1.209	enzyme		1	0.0345	CEBPD,EFNA1,ERRFI1,RCAN1
	puromycin aminonucleoside		chemical reagent		1	0.0477	ACTG1,ADAMTS1,Pvr,TNFRSF12A
	ERBB2		kinase		0.996	0.00653	AREG,ATF4,B4GALT3,BCL2L1,C3AR1,CCND2,CCR5,CX3CR1,GBP6,GDNF,HES1,ID2,ITGA5,KLF4,MCL1,NEDD9,PER1,POLR2A,PRR15L,TAX1BP3,TSPAN13,WSB2,ZFP36L2	124 (18)
	NOTCH1		transcription regulator		0.995	4.54e-06	AREG,BCL2L1,CCND2,CEBPD,DNAJA1,HES1,HSP90AB1,ID2,IRF8,LFNG,MCAM,NRARP,SPRY2,TRIB2,ULK1	127 (13)
	Ifn gamma		complex		0.988	0.00713	BCL2L1,CXCL16,IRF8,NR4A3,SOCS7	75 (8)
	ERK1/2		group		0.98	0.00225	AREG,BCL2L1,BDNF,CCND2,HMGA1,HPGD,KLF13,MCL1,NR4A3,PTGER4,SPRY4	119 (17)
	EZH2		transcription regulator		0.979	0.00664	AREG,BCL11A,BCL2L1,CCND2,CCR5,EFNA1,EPC1,KLF2,KLF4,PER1,PPP2CB,RPS6KA2,SPIB	70 (10)
	PIM1	-0.431	kinase		0.97	0.000834	BCL2L1,CCND2,EPHA2,HPGD,ID2,PIM1	128 (21)
	IFNB1		cytokine		0.967	0.000474	BCL2L1,BDNF,CCR5,COL12A1,CREM,Ctla2a/Ctla2b,CYP1A1,GBP6,Mx1,RASSF1,SPRY2,TNFRSF10A	130 (17)
	MAP2K5		kinase		0.958	0.00388	CREM,KLF2,KLF5,NR4A3
	NAMPT		cytokine		0.958	0.0414	BDNF,EPHA2,HPGD,KMO
	ERG		transcription regulator		0.956	4.52e-05	ARHGAP4,DSTN,EGFL7,HPGD,NEDD9,NR4A2,PIM1,PTGER4,RASSF1,SLC22A23,TGFB1I1,TMEM263,TSC22D3
	BMP10		growth factor		0.956	0.000168	CCR1,COL12A1,CX3CR1,HPGD,ID2,NR4A2,NR4A3	50 (7)
	ceruletide		biologic drug		0.956	0.000352	ACTG1,ATF4,DNAJA1,ERRFI1,GADD45G,HMGA1,TAX1BP3
	ETS1		transcription regulator		0.951	0.00287	ARL4C,BCL11A,BCL2L1,CITED2,ETS2,HPGD,ID2,MCAM,MCL1	83 (14)
	KAT2A		enzyme		0.946	0.000945	ADAMTS1,BCL11A,BCL2L1,CCND2,HMGA1,HSP90AA1,TNFRSF10A	94 (10)
	STAT5A		transcription regulator		0.941	9e-07	BCL11A,BCL2L1,CCND2,CCR5,Ctla2a/Ctla2b,FOSL2,GADD45G,ID2,KLF10,MCL1,NR4A2,PIM1,PRR15L,TNFRSF25,TSPAN13,TXNIP	115 (15)
	tretinoin		chemical drug		0.932	0.000156	ADAM11,AREG,ATF4,BCL2L1,C3AR1,CCND2,CCR1,CCR5,CEBPG,CHKA,CITED2,CREM,CSRNP1,CX3CR1,CYP1A1,DYNLL1,ERRFI1,FOSL2,HES1,HMGA1,HSP90AA1,ID2,IRF8,KCNJ2,KLF10,KLF13,KLF4,KLF5,MAPK6,MCL1,Nes,PAK1,PIM1,PPP1R16B,SLC38A2,SP110,TNFAIP6,TNFRSF10A,TSC22D3,YWHAZ,ZNF217	145 (19)
	tetrachlorodibenzodioxin		chemical toxicant		0.93	0.0132	ATF4,BDNF,CYP1A1,ENPEP,ETS2,HES1,ITGA5,KLF2,NEDD9,PDE4B,S1PR1,SLC40A1,TSC22D3
	haloperidol		chemical drug		0.913	0.00497	BDNF,NR4A2,NR4A3,PER1,SPRY2	73 (14)
	CCL2		cytokine		0.896	0.00271	BCL2L1,CEBPD,ITGA5,KLF4,SLC11A1,SLC40A1	134 (19)
	NCOA2		transcription regulator		0.896	0.0183	CYP1A1,KLF4,Mx1,NR4A2,NR4A3,TSC22D3
	SMAD4		transcription regulator		0.871	0.00595	AREG,BDNF,CCND2,CITED2,GDNF,ID2,RASSF1,SERTAD1,TNFAIP6,TNFRSF10A	77 (11)
	CSF3		cytokine		0.853	0.00203	BCL2L1,C3AR1,CCND2,CEBPD,CX3CR1,GADD45G,GDNF,MCL1,PIM1	117 (14)
	phorbol 12,13-dibutyrate		chemical - endogenous non-mammalian		0.849	0.000986	BCL2L1,CCND2,SPRY2,SPRY4	101 (10)
	methyl methanesulfonate		chemical toxicant		0.849	0.00574	ATF4,GADD45G,KLF4,MCL1	86 (7)
	dihydrotestosterone		chemical - endogenous mammalian		0.842	0.00174	ADAMTS1,AREG,BCL2L1,C1orf116,CCND2,CYTH2,DYNLL1,EFNA1,HPGD,HSP90AA1,ID2,IL17RB,IQGAP2,IRX2,MCAM,PER1,PTGER4,TGM4	158 (22)
	valproic acid		chemical drug		0.835	3.95e-05	ATF4,Atp10d,BCL2L1,BDNF,CCND2,CCR1,CHKA,CYP1A1,FRMD6,GDNF,ID2,MCL1,PAK1,SIAH2,SMIM3,TNFRSF10A,TSC22D3,YWHAH	141 (20)
	rotenone		chemical toxicant		0.83	0.00186	ATF4,GADD45G,NR4A2,SESN2,TXNIP
	IL10RA		transmembrane receptor		0.822	0.0422	Ces1f,CLEC9A,FOXF1,GBP6,HPGD,S1PR1,Serpinb6b,TRPM2
	okadaic acid		chemical toxicant		0.816	0.000191	BCL2L1,BDNF,CCND2,FOSL2,KLF4,MCL1,PIM1	117 (19)
	NR3C2		ligand-dependent nuclear receptor		0.816	0.00259	ADAMTS1,BCL2L1,CCR5,CNN3,NR4A2,RGS2,TSC22D3	111 (9)
	NANOG		transcription regulator		0.816	0.00604	CCND2,ID2,KLF4,RCAN1,SEC22B,TET2,TFAP4
	nitrofurantoin		chemical drug		0.816	0.0174	ACTG1,ADAMTS1,BCL2L1,LCAT,TNFRSF12A,YWHAZ
	geldanamycin		chemical drug		0.809	0.00319	BCL2L1,CEBPD,CYP1A1,DNAJB1,HMGA1,HSP90AA1,HSP90AB1,PAK1,RPS6KA2,TRIM32	123 (17)
	resiquimod		chemical drug		0.777	3.84e-05	ACTG1,ATF4,C3AR1,CCND2,CCR1,CD180,ETS2,HES1,HSP90AA1,HSP90AB1,MCL1,MUCL3,PDE4B,PIM1,PTGIR,TRPM2,ZFP36L2	132 (17)
	FDX1		transporter		0.762	0.00037	DNAJB1,ID2,MEPCE,PIM1
	Hedgehog		group		0.762	0.000375	BDNF,CCND2,FOXF1,HES1,KLF4
	3-deazaneplanocin		chemical drug		0.762	0.0116	BCL2L1,IRF8,KLF6,TSC22D3
	CCN2		growth factor		0.749	0.0491	ADAMTS1,BCL2L1,HES1,PI4K2B
	Z-LLL-CHO		chemical - protease inhibitor		0.748	0.00119	ATF4,BCL2L1,CCND2,CYP1A1,DUSP8,HSP90AA1,HSP90AB1,KLF5,MAPK6,MCL1,TNFRSF10A,WDR24,YWHAZ	130 (17)
	STAT5a/b		group		0.74	0.00563	BCL2L1,CCND2,ID2,MCL1,PDE4B,PIM1	106 (13)
	paclitaxel		chemical drug		0.736	0.00372	AREG,ATF4,BCL2L1,CYP1A1,EPHA2,HSP90AB1,ITGA5,KLF4,MCL1,SRF,TNFRSF10A	148 (21)
	MYC		transcription regulator		0.731	0.000533	ADAMTS1,Arf2,ATF4,BCL2L1,BDNF,CCND2,CEBPD,CHKA,CYTH2,EPHA2,FOXF1,GADD45G,HES1,HMGA1,HSP90AA1,ID2,IER5,IL17RB,IQGAP2,KLF10,KLF4,KLF6,MCL1,NDEL1,PAK1,RCAN1,RPS6KA2,SLC11A1,TFAP4,TNFRSF10A,TNFRSF12A,TXNIP	116 (16)
	cytarabine		chemical drug		0.728	0.00154	CD180,MCC,MCL1,Pvr,SESN2
	ciprofibrate		chemical drug		0.728	0.0104	ADAMTS1,ATOSA,CCND2,CHKA,ETS2,TNFRSF10A
	IFN Beta		group		0.711	0.00206	AREG,BCL2L1,C3AR1,CEBPD,ENPEP,HAAO,KMO,Mx1,SPRY2,SPRY4	131 (18)
	TGFBR2		kinase		0.707	0.00528	AREG,ATF4,BDNF,CX3CR1,GADD45G,HPGD,IRF8,Serpinb6b,SH3BP2,SPATA2,TNFRSF12A,TXNIP	118 (11)
	LEF1		transcription regulator		0.707	0.0152	CEBPD,CX3CR1,FRMD6,GEM,HES1,ID2,LFNG,RASGEF1B,Serpinb6b
	ESRRA		transcription regulator		0.707	0.0428	C3AR1,CHKA,CX3CR1,EFNA1,EGFL7,ENPEP,EPHA2,TNFRSF12A
	palmitic acid		chemical - endogenous mammalian		0.702	0.0204	ATF4,BCL2L1,DUSP8,GEM,KLF4,MCL1,NR4A2,NR4A3,RGS2,SLC40A1,TXNIP
	PTGS2		enzyme		0.694	4.1e-05	AREG,BCL2L1,CHKA,DYNLL1,IRX1,IRX2,MCL1,NR4A2,PAK1,PTGER4,TNFAIP6,TNFRSF12A	110 (15)
	5-N-ethylcarboxamido adenosine		chemical reagent		0.693	1.43e-05	CEBPD,CREM,DUSP16,GDNF,KLF6,NR4A2,NR4A3,RGS2,TXNIP	120 (13)
	Tgf beta		group		0.676	0.000362	ARID3A,BCL2L1,CCND2,COL12A1,CX3CR1,CXCL17,HES1,HSP90AA1,ID2,ITGA5,KLF10,LCAT,MAFK,NEDD9,NR4A2,TNFRSF12A	127 (19)
	Il3		cytokine		0.676	0.0153	BCL2L1,CCND2,MCL1,PIM1
	Hsp90 (family)		group		0.661	0.00521	BCL2L1,CCND2,CD4,DNAJB1,MCL1	113 (15)
	PIN1		enzyme		0.655	0.0188	ATF4,HES1,MCL1,TNFRSF10A
	ESR1		ligand-dependent nuclear receptor		0.644	0.00426	AREG,BCL2L1,BDNF,CEBPD,CEBPG,CRKL,CYP1A1,EFNA1,EGFL7,FOSL2,GADD45G,GEM,GNB1,HES1,HSP90AA1,MCL1,NEDD9,PAK1,PRR15L,SEC14L1,SIAH2,SLC38A2,SP110,SPRY4,TNFAIP6,TNFRSF10A,TRIM16,TRPM2,TSC22D3,TXNIP	151 (18)
	ADAM17		peptidase		0.64	0.000328	ACTG1,AREG,DNAJA1,ERRFI1,GADD45G,HES1,HMGA1,TAX1BP3	59 (8)
	IRF7		transcription regulator		0.64	0.0219	ATF4,BCL2L1,DNAJA1,IRF8,MCL1,Mx1
	TREM1		transmembrane receptor		0.632	0.000196	AREG,ETS2,GEM,HES1,KCNJ2,NR4A2,OSGIN1,PLEKHF2,RCAN1,SPRY2	123 (11)
	IL3		cytokine		0.627	0.000417	AREG,BCL2L1,CCND2,CEBPG,CITED2,CREM,FOSL2,GADD45G,IL17RB,KLF13,MCL1,NEDD9,PIM1	107 (18)
	TNFSF10		cytokine		0.626	0.00175	BCL2L1,CD4,IL17RB,MCL1,PER1,RCAN1,TNFRSF10A	139 (20)
	CD28		transmembrane receptor		0.583	0.00182	BCL2L1,CCND2,CCR5,CLK1,CREM,IRF8,KLF2,Mx1,ORAI2,PDE4B,POLR2A,PTGER4	132 (18)
	SIRT1		transcription regulator		0.569	0.0307	BCL2L1,BDNF,CCND2,CYP1A1,GBP6,KIF5C,KLF2,MCL1,PER1,SP110,TSG101
	miR-125b-5p (and other miRNAs w/seed CCCUGAG)		mature microRNA		0.563	7.28e-05	ABTB1,ADAMTS1,ARID3A,CCR5,CEBPG,CYP1A1,ID2,KLF13	102 (10)
	deferoxamine		chemical drug		0.563	0.00711	BDNF,CCND2,CITED2,DUSP16,ERRFI1,GEM,NR4A2,SPRY4	119 (13)
	PIAS1		transcription regulator		0.555	0.00267	BDNF,KLF2,KLF5,MCL1,PAK1	87 (8)
	doxorubicin		chemical drug		0.548	0.00138	ADAMTS1,AREG,BCL2L1,CREM,GBP6,HSP90AA1,ID2,MCL1,OSGIN1,PCGF3,Pvr,SESN2,SH3RF3,SP110,TNFRSF10A,TNFRSF12A,TXNIP,ULK1	138 (19)
	IKZF1		transcription regulator		0.547	0.00766	BCL2L1,CCND2,CCR1,CITED2,HES1,KLF4,LIG4,NRARP,TXNIP	118 (14)
	trichostatin A		chemical drug		0.524	5.07e-07	ADAMTS1,AREG,BCL11A,BCL2L1,BDNF,CCND2,CREM,CYP1A1,DUSP16,EPC1,FOSL2,GADD45G,HES1,ID2,IRF8,KIF5C,KLF4,KLF5,MTF1,Nes,NR4A2,PAK1,PIM1,RAB3A,RASSF1,SIAH2,SPIB,SRF,TNFRSF10A,TRIM32,TXNIP,ULK1,YWHAH	132 (16)
	Jnk		group		0.52	0.00693	BCL2L1,GDNF,HES1,KLF6,MCL1,SESN2,TNFRSF10A,TNFRSF12A	139 (20)
	IL4		cytokine		0.502	3.1e-07	ACTG1,AREG,ARID5A,BCL11A,BCL2L1,BDNF,CCND2,CCR1,CCR5,CITED2,Cmah,Ctla2a/Ctla2b,CXCL16,EPHA2,GADD45G,GBP6,HLX,HPGD,IL17RB,IRF8,KLF4,KLF6,KMO,LFNG,LIG4,MCL1,Mx1,NEDD9,NR4A3,PDE4B,PIM1,RASGEF1B,Serpinb6b,SH3BP2,SLC25A25,SP110,SPATA2,TFAP4,TNFAIP6	100 (15)
	5-azacytidine		chemical drug		0.489	0.0101	BCL2L1,EPHA2,IRF8,KLF4,KLF6,MCL1,RASSF1
	E. coli B5 lipopolysaccharide		chemical - endogenous non-mammalian		0.478	0.0457	ADAMTS1,CCR1,CCR5,CX3CR1,ERRFI1,ETS2,PDE4B
	GLI2		transcription regulator		0.468	0.00148	BCL2L1,CCND2,CCR1,CCR5,RCAN1,SPRY2,TFAP4	56 (7)
	MYB		transcription regulator		0.468	0.0107	BCL2L1,CD4,CNN3,CXCL16,KLF4,NEDD9,TET2
	isoprenaline		chemical drug		0.447	0.000537	IER5,KLF5,NR4A2,NR4A3,PER1	19 (3)
	TAL1		transcription regulator		0.447	0.00215	BTBD3,C3AR1,ID2,NR4A3,PTGER4,RNASE6,SPRY2,TMEFF1,TNFAIP1	24 (3)
	CX3CL1		cytokine		0.447	0.0117	ADAMTS1,ATF4,BCL2L1,Ctla2a/Ctla2b,CX3CR1,ID2
	NR5A2		ligand-dependent nuclear receptor		0.447	0.0242	C3AR1,CEBPD,CXCL16,GADD45G,TNFRSF12A
	CASR		G-protein coupled receptor		0.447	0.0279	BCL2L1,CCND2,GADD45G,NEDD9,TXNIP
	metformin		chemical drug		0.446	0.00442	ATF4,CCND2,GADD45G,HES1,IER5,IL17RB,LCAT,SESN2,SOCS5,TXNIP,ULK1
	IFNG		cytokine		0.437	1.49e-09	AREG,ATF4,BCL11A,BCL2L1,BDNF,CCND2,CCR1,CCR5,CD4,CEBPD,CELSR1,CREM,CX3CR1,CXCL16,CXCL17,ETS2,GBP6,GDNF,HAAO,HES1,HMGA1,HSP90AA1,HSP90AB1,ID2,IL17RB,IRF8,ITGA5,KLF10,KLF2,KLF4,KLF6,KMO,MAFK,Mx1,NEDD9,NR4A3,PIM1,S1PR1,S1PR2,SLC11A1,SLC40A1,SP110,TAB1,TFAP4,TNFAIP6,TNFRSF10A,TNFRSF12A,TRIB2,TSC22D3,TXNIP	137 (19)
	3,4,5,3',4'-pentachlorobiphenyl		chemical toxicant		0.416	0.0212	BDNF,CCND2,CYP1A1,ETS2
	filgrastim		biologic drug		0.412	0.0013	BCL2L1,EDARADD,ERLIN1,ETS2,HMGA1,HPGD,KLF6,MAPK6,NR4A3,PDE4B,S1PR1,TNFRSF10A,TNFRSF25,TRPM2
	TNFSF11		cytokine		0.408	1.63e-05	BCL2L1,C3AR1,CCR1,CYP1A1,DUSP16,IRF8,ITGA5,PIM1,PTGER4,RCAN1,Serpinb6b,SPIB,TSPAN13,YWHAZ	139 (18)
	resveratrol		chemical drug		0.407	0.00253	BCL2L1,BDNF,CCND2,CX3CR1,CYP1A1,DYNLL1,FOSL2,MCL1,SESN2,TNFAIP6,TNFRSF10A	136 (19)
	MIF		cytokine		0.391	0.0398	BCL2L1,C3AR1,CCR1,CCR5,CXCL16
	Hdac		group		0.389	7.84e-06	ADAMTS1,AREG,BCL2L1,BDNF,GDNF,HPGD,KLF10,KLF6,OSR1,SPRY2,TXNIP	105 (8)
	IL33		cytokine		0.389	9.77e-05	ADAMTS1,AREG,BCL2L1,CCR1,CREM,Ctla2a/Ctla2b,CXCL16,FOSL2,ID2,IL17RB,ITGA5,KLF4,PTGER4,RPS6KA2,SLC11A1,TNFRSF25	103 (13)
	CSF2		cytokine		0.387	0.00756	BCL2L1,CCND2,CCR1,CCR5,CD180,CX3CR1,ID2,MCL1,NR4A2,NR4A3,PDE4B,PIM1,PTGER4,TRIB2	102 (15)
	CD44		other		0.381	0.000999	BCL2L1,CCND2,CCR5,CX3CR1,HSP90AB1,ITGA5,KCTD10,KLF4,MCL1,TAB1	102 (18)
	EGR1		transcription regulator		0.378	0.0118	AREG,CCND2,CCR1,CREM,ENPEP,GDNF,HPGD
	everolimus		chemical drug		0.374	0.000585	ATF4,BCL2L1,CCND2,MCL1,TNFRSF10A	111 (10)
	PRL		cytokine		0.351	1.17e-06	AREG,BCL2L1,CEBPD,CNN3,FILIP1L,HES1,ID2,NEDD9,PIM1,PRR15L,RCAN1,SP110,SRF,TNFRSF12A,TSC22D3,TSPAN13,TXNIP	133 (20)
	glucocorticoid		chemical drug		0.351	0.0422	BDNF,CEBPD,IRF8,NR4A2,PER1,SPIB,TSC22D3,TXNIP
	PAX3-FOXO1		fusion gene/product		0.347	0.000871	ARID3A,CCND2,FOXF1,HSP90AA1,ITGA5,KLF5,MCAM,PDE4B,SRF,YWHAZ,ZFP36L2
	MTOR		kinase		0.343	7e-05	ARL4C,BCL2L1,CEBPD,CHKA,CITED2,EFNA1,HSP90AB1,IRF8,MCL1,PIM1,S1PR1,SEC22B,TNFRSF10A,TNFRSF25,TXNIP	144 (20)
	ID2	-0.298	transcription regulator		0.333	1.69e-07	BCL2L1,CCND2,CCR1,CCR5,ETS2,GADD45G,IL17RB,IRF8,KLF13,KLF6,MCAM,NR4A3,RPS6KA2,SOCS5,TNFRSF25	31 (5)
	bexarotene		chemical drug		0.333	0.000751	AMOTL2,CEBPG,EPHA2,GDNF,KLF10,Nes,NR4A2,SIAH2,TSC22D3
	estrogen receptor		group		0.333	0.00143	BDNF,CCND2,COL12A1,CYP1A1,HSP90AA1,KLF10,NEDD9,RGS2,TMEFF1,TSC22D3	111 (9)
	poly rI:rC-RNA		biologic drug		0.314	6.69e-05	ARID5A,ATF4,CCND2,CCR1,CEBPD,GBP6,GEM,IQGAP2,IRF8,ITGA5,KLF4,KLF6,KMO,MCL1,Mx1,NEDD9,NR4A2,NR4A3,PIM1,RGS2,SLC40A1,SP110,TET2,TNFAIP6,TNFRSF10A	136 (19)
	POU5F1		transcription regulator		0.312	0.000536	BCL10,EPHA2,FOXF1,GADD45G,IER5,KLF2,KLF4,MCL1,RCAN1,SLC11A1,TET2,TFAP4,TNFRSF10A,TNFRSF25	70 (3)
	BMP6		growth factor		0.308	0.000314	ADAMTS1,ERRFI1,GDNF,ID2,ITGA5,KLF4,TNFRSF12A	97 (9)
	WT1		transcription regulator		0.306	0.0457	AREG,BCL2L1,EFNA1,IRF8,KLF4,MCL1,NR4A2
	KLF5	0.26	transcription regulator		0.305	0.0464	BCL2L1,CEBPD,CSRNP1,KLF5
	tazemetostat		chemical drug		0.302	0.00236	ADAMTS1,BCL11A,BDNF,CCND2,KIF5C,KLF4,NR4A2,PAK1,RAB3A,SIAH2,ULK1
	levodopa		chemical - endogenous mammalian		0.286	0.000112	ARHGAP4,BCL2L1,BTBD3,CEBPG,EGFL7,ERLIN1,ETS2,GDNF,KLF6,Mocs1,NRARP,PER1,RESF1,S1PR2,SEC14L1,SIAH2,SLC38A2,SOCS5,TAX1BP3,TNFAIP1,ZNF717
	PRKCE		kinase		0.277	0.0166	BCL2L1,HSP90AB1,PIM1,RGS2
	YY1		transcription regulator		0.272	0.00677	ARID3A,ATF4,BCL2L1,BDNF,CCR5,GADD45G,ID2,KLF2,KLF4,TNFRSF10A	122 (18)
	cobalt chloride		chemical reagent		0.263	2.86e-05	ADAMTS1,BDNF,CITED2,CYP1A1,FOSL2,HES1,HSP90AB1,MCL1,SLC40A1,ULK1	144 (21)
	evodiamine		chemical - endogenous non-mammalian		0.254	0.000425	BCL2L1,CYP1A1,MCL1,TNFRSF10A	110 (11)
	WNT1		cytokine		0.254	0.0286	CCND2,ETS2,GADD45G,HES1,KLF5
[truncated: 223 more rows]

## Sheet: g Yoshida SpatialDecon
	6 mice per group	M1_MP	M2_MP	M3_MP	M4_MP	M5_MP	M6_MP	M1_PBS	M2_PBS	M3_PBS	M4_PBS	M5_PBS	M6_PBS
[truncated: 30 more rows]

[truncated: 1 more sheets: h Nanostring SpatialDecon]
