# Supplementary material for: Microplastics dysregulate innate immunity in the SARS-CoV-2 infected lung
Source: Front Immunol. 2024 May 13;15:1382655. doi: 10.3389/fimmu.2024.1382655 (PMC11128561; doi:10.3389/fimmu.2024.1382655)
Supplement: Supplementary file 5 [file Table_4.xlsx]

## Sheet: a Alignment summary
	Sample name	Group	Day	Aligned reads
Paired RNA-Seq reads were aligned to the mouse GRCm39 reference genome. Paired alignments were counted using Samtools	M1	MP	6	89107586
	M2	MP	6	101042450
	M3	MP	6	102102694
	M4	MP	6	113184270
	M5	MP	6	104724014
	M6	MP	6	91292366
	M1	PBS	6	98026304
	M2	PBS	6	82660240
	M3	PBS	6	105965218
	M4	PBS	6	135024460
	M5	PBS	6	95438744

## Sheet: b All genes +MP vs PBS day 6
	Ensembl_ID	HUGO_ID	logFC	logCPM	F	PValue	FDR
+MP vs. PBS at day 6. Differential expression statistics for all genes from lungs of C57BL/6J mice.	ENSMUSG00000059668.7	Krt4	11.4683	6.69543	17.4937	0.000366526	0.278862
	ENSMUSG00000044041.5	Krt13	10.9326	6.70192	17.1751	0.000402926	0.281486
	ENSMUSG00000059956.15	Serpinb12	8.31768	2.14097	18.734	0.000255495	0.223545
	ENSMUSG00000043165.8	Lor	7.9934	3.86335	16.533	0.000488878	0.281486
	ENSMUSG00000056328.15	Myh1	7.97673	3.3813	10.7538	0.00333395	0.520496
	ENSMUSG00000068893.6	Sprr2a2	6.42602	2.69226	14.0025	0.00108581	0.387767
	ENSMUSG00000050463.10	Krt78	6.13533	1.9996	14.6772	0.000872556	0.37078
	ENSMUSG00000061527.8	Krt5	5.94075	2.46914	14.9607	0.000797007	0.366484
	ENSMUSG00000027401.10	Tgm3	5.78062	3.06803	15.4258	0.00068811	0.343036
	ENSMUSG00000033508.9	Asprv1	5.48396	3.96395	14.1474	0.00103561	0.377543
	ENSMUSG00000074156.7	Ces1h	5.22246	-0.255932	11.3119	0.00272538	0.488393
	ENSMUSG00000028148.12	Them5	4.946	0.872878	16.0924	0.000559398	0.296633
	ENSMUSG00000041984.3	Rptn	4.67971	4.21346	14.2599	0.000998373	0.371713
	ENSMUSG00000043430.6	Psapl1	4.25355	1.32583	13.574	0.00125056	0.400582
	ENSMUSG00000031372.8	Trex2	4.2377	-0.427353	12.4093	0.00185413	0.415968
	ENSMUSG00000061723.19	Tnnt3	4.196	2.88546	10.0787	0.00427787	0.53855
	ENSMUSG00000045545.9	Krt14	4.06476	0.19691	12.805	0.00161919	0.403821
	ENSMUSG00000030693.11	Klk10	4.05063	1.38979	13.318	0.00136193	0.400582
	ENSMUSG00000068697.8	Myoz1	4.01534	-0.0758699	8.97787	0.00651237	0.572663
	ENSMUSG00000000031.18	H19	3.87318	2.83075	7.8956	0.0100259	0.599509
	ENSMUSG00000031097.16	Tnni2	3.74418	2.26163	10.1605	0.00414928	0.530045
	ENSMUSG00000054146.9	Krt15	3.74412	2.5776	11.0207	0.00302613	0.510658
	ENSMUSG00000030672.13	Mylpf	3.47898	2.18919	9.30868	0.00572897	0.548168
	ENSMUSG00000050359.8	Sprr1a	3.22758	1.50702	10.2745	0.00397702	0.528755
	ENSMUSG00000017697.4	Ada	3.09336	3.21694	11.5949	0.00246423	0.466173
	ENSMUSG00000044737.7	Klk14	2.95903	1.55394	13.5992	0.00124014	0.400582
	ENSMUSG00000026950.19	Neb	2.8296	1.931	8.33672	0.00838954	0.597116
	ENSMUSG00000006457.5	Actn3	2.7286	0.756603	8.13362	0.00910312	0.598575
	ENSMUSG00000032262.14	Elovl4	2.57838	0.366429	11.0064	0.00304176	0.510658
	ENSMUSG00000075296.6	Aldh3b2	2.4796	0.41295	8.62993	0.00746586	0.587968
	ENSMUSG00000020411.3	Nipal4	2.43845	-0.136901	12.9849	0.00152338	0.403176
	ENSMUSG00000027077.8	Smtnl1	2.31459	-0.521106	7.05032	0.0142431	0.634903
	ENSMUSG00000047586.5	Nccrp1	2.23647	0.74049	8.207	0.00883783	0.597116
	ENSMUSG00000032454.10	Rbp2	2.23471	0.0136516	7.57329	0.0114445	0.615472
	ENSMUSG00000007122.12	Casq1	2.22312	1.0807	9.1702	0.00604353	0.559554
	ENSMUSG00000029361.19	Nos1	2.15996	-0.377723	4.005	0.0574798	0.773723
	ENSMUSG00000076731.4	Ighv8-12	2.10469	1.34432	4.68635	0.0411871	0.743063
	ENSMUSG00000078746.3	Fam205a4	2.08396	0.285858	4.33043	0.0489312	0.752697
	ENSMUSG00000096515.6	Igkv14-100	2.0569	-0.192738	5.34463	0.0302333	0.713972
	ENSMUSG00000030730.13	Atp2a1	2.04709	3.36567	4.84828	0.0381287	0.736638
	ENSMUSG00000092586.9	Ly6g6c	1.93564	1.72527	9.00702	0.0064388	0.569054
	ENSMUSG00000001497.19	Pax9	1.92625	0.380327	7.73985	0.0106856	0.599978
	ENSMUSG00000047517.14	Dmbt1	1.91765	-0.385711	5.28725	0.031045	0.71631
	ENSMUSG00000021565.17	Slc6a19	1.90739	-0.352082	6.9385	0.0149353	0.646778
	ENSMUSG00000076591.4	Igkv8-16	1.89582	1.84441	2.39072	0.135907	0.864353
	ENSMUSG00000094164.3	Ighv2-3	1.88981	-0.350237	2.28386	0.144544	0.866356
	ENSMUSG00000017002.15	Slpi	1.80957	4.61964	7.76775	0.010564	0.599978
	ENSMUSG00000042306.12	S100a14	1.76376	3.21375	7.94521	0.00982539	0.599509
	ENSMUSG00000063130.5	Calml3	1.75738	3.29019	7.34994	0.0125574	0.629245
	ENSMUSG00000050211.15	Pla2g4e	1.74671	-0.30868	4.232	0.0513547	0.763472
	ENSMUSG00000092386.2	Gm20536	1.74267	1.33311	3.7496	0.0653869	0.79143
	ENSMUSG00000043461.14	Sptssb	1.74121	0.530624	5.73918	0.0252545	0.681691
	ENSMUSG00000032281.12	Acsbg1	1.7099	1.35317	6.72406	0.0163694	0.65138
	ENSMUSG00000037188.8	Grhl3	1.70439	0.708584	8.3091	0.00848283	0.597116
	ENSMUSG00000039518.8	Cdsn	1.69005	1.71656	5.88448	0.0236575	0.675704
	ENSMUSG00000030592.19	Ryr1	1.68338	1.38329	6.29311	0.0197379	0.659775
	ENSMUSG00000059741.14	Myl3	1.64356	2.39364	5.56596	0.0273178	0.694817
	ENSMUSG00000048721.3	Fndc9	1.61231	-0.359453	6.68553	0.016643	0.65138
	ENSMUSG00000096715.3	Igkv3-4	1.6082	2.44741	1.43166	0.243861	0.907517
	ENSMUSG00000038295.15	Atg9b	1.6054	0.334279	6.06028	0.0218739	0.664534
	ENSMUSG00000027470.10	Mylk2	1.6033	-0.485631	4.3117	0.0493822	0.754048
	ENSMUSG00000115232.2	Gm49378	1.57519	0.022623	3.19052	0.0874529	0.811159
	ENSMUSG00000030510.12	Cers3	1.54592	0.460219	5.77383	0.024863	0.681691
	ENSMUSG00000060962.13	Dmkn	1.53195	4.16585	8.47053	0.00795321	0.589717
	ENSMUSG00000028435.9	Aqp3	1.51243	1.73919	6.23098	0.0202842	0.659775
	ENSMUSG00000024331.12	Dsc2	1.48733	1.62596	4.86613	0.0378076	0.732909
	ENSMUSG00000021456.9	Fbp2	1.43895	-0.227611	7.12771	0.0137849	0.632457
	ENSMUSG00000030399.3	Ckm	1.43802	4.44301	3.63725	0.0692531	0.796512
	ENSMUSG00000024401.15	Tnf	1.4125	1.78881	13.1082	0.00146128	0.403176
	ENSMUSG00000058022.15	Adtrp	1.36926	-0.235228	7.6651	0.011019	0.607583
	ENSMUSG00000020892.11	Aloxe3	1.34169	1.76548	6.24894	0.0201246	0.659775
	ENSMUSG00000022871.14	Fetub	1.31189	2.21423	5.62999	0.026534	0.684835
	ENSMUSG00000063767.5	S100a7a	1.29185	0.303669	6.34854	0.0192643	0.659775
	ENSMUSG00000026989.6	Dapl1	1.29184	0.0090311	5.52423	0.0278425	0.699019
	ENSMUSG00000035105.6	Egln3	1.2569	1.63504	5.02186	0.0351308	0.72769
	ENSMUSG00000022510.15	Trp63	1.23308	0.297338	5.48668	0.0283244	0.700069
	ENSMUSG00000067616.12	Klk11	1.21524	1.53545	7.58671	0.0113812	0.61469
	ENSMUSG00000040705.4	A930016O22Rik	1.21489	0.470601	3.45616	0.0760489	0.802467
	ENSMUSG00000078964.3	Ces1b	1.18367	0.0793006	3.0097	0.0963483	0.820335
	ENSMUSG00000076652.5	Ighv7-3	1.16073	-0.288818	5.4914	0.0282632	0.699545
	ENSMUSG00000020893.18	Per1	1.15911	6.57187	60.1508	8.03634e-08	0.00140628
	ENSMUSG00000059900.15	Tmem40	1.14943	0.80182	6.06217	0.0218556	0.664534
	ENSMUSG00000076615.5	Ighg3	1.14124	3.38047	0.894349	0.354275	0.944722
	ENSMUSG00000030680.7	Pagr1a	1.12404	1.68059	8.27662	0.00859406	0.597116
	ENSMUSG00000028341.10	Nr4a3	1.12336	2.47545	24.5459	5.43171e-05	0.0864086
	ENSMUSG00000097768.4	2310043M15Rik	1.11465	0.845559	6.0017	0.022451	0.666643
	ENSMUSG00000019853.7	Hebp2	1.07398	1.21272	8.03468	0.00947482	0.599509
	ENSMUSG00000032373.16	Car12	1.06155	1.21086	4.74504	0.0400477	0.737654
	ENSMUSG00000061816.16	Myl1	1.05608	2.14607	1.83618	0.188752	0.894277
	ENSMUSG00000019102.11	Aldh3a1	1.02523	4.57218	4.72255	0.0404801	0.740347
	ENSMUSG00000001403.14	Ube2c	1.02116	1.77992	3.56812	0.0717619	0.800275
	ENSMUSG00000032496.8	Ltf	1.01175	6.36253	3.59059	0.0709352	0.799147
	ENSMUSG00000032278.12	Paqr5	0.992901	0.572227	8.02958	0.00949441	0.599509
	ENSMUSG00000050974.5	Gm9847	0.985584	-0.164718	18.882	0.000244919	0.223545
	ENSMUSG00000028786.16	Tmem54	0.952081	0.735854	6.8048	0.0158123	0.65138
	ENSMUSG00000034579.18	Pla2g3	0.948919	0.852118	6.69021	0.0166095	0.65138
	ENSMUSG00000046056.16	Sbsn	0.929538	4.41564	5.87652	0.023742	0.675704
	ENSMUSG00000038020.6	Rapgefl1	0.923876	2.61362	10.2985	0.00394165	0.528755
	ENSMUSG00000027376.16	Prom2	0.908383	2.06951	5.30154	0.0308406	0.71631
	ENSMUSG00000021123.13	Rdh12	0.901047	1.4147	3.52969	0.0732015	0.80107
	ENSMUSG00000040694.5	Apobec2	0.900103	2.35506	2.82724	0.106407	0.824443
	ENSMUSG00000003863.19	Ppfia3	0.892666	0.0459197	5.98947	0.0225736	0.666643
	ENSMUSG00000027887.12	Sypl2	0.886984	-0.306672	1.94793	0.176335	0.880609
	ENSMUSG00000032013.7	Trim29	0.883281	2.97303	6.55043	0.0176431	0.655321
	ENSMUSG00000061517.9	Sox21	0.865934	0.0327346	4.22259	0.0515933	0.763472
	ENSMUSG00000075307.4	Klhl41	0.848176	1.9232	2.24439	0.147899	0.869589
	ENSMUSG00000037469.12	Acp7	0.845512	-0.308966	2.6671	0.116259	0.839945
	ENSMUSG00000070385.13	Ampd1	0.844818	-0.0576533	3.25816	0.0843723	0.808692
	ENSMUSG00000054046.8	Klk13	0.838912	2.47113	7.72034	0.0107715	0.599978
	ENSMUSG00000025329.4	Padi1	0.837808	0.0711513	3.04102	0.0947351	0.820335
	ENSMUSG00000002500.16	Rpl3l	0.835416	-0.243137	2.52483	0.12592	0.849467
	ENSMUSG00000078377.6	Gm4294	0.826562	1.5807	0.431512	0.517863	0.964784
	ENSMUSG00000038670.12	Mybpc2	0.807419	2.0558	3.74361	0.0655868	0.79143
	ENSMUSG00000097178.9	2310002F09Rik	0.796792	-0.209409	7.0477	0.0142589	0.634903
	ENSMUSG00000026073.14	Il1r2	0.796111	-0.163038	3.1525	0.0892414	0.811485
	ENSMUSG00000019987.10	Arg1	0.795099	1.57603	6.05002	0.0219737	0.665967
	ENSMUSG00000069808.14	Tlcd3a	0.792205	4.75732	5.83516	0.0241866	0.677138
	ENSMUSG00000022218.17	Tgm1	0.791575	2.40859	5.43671	0.0289801	0.704094
	ENSMUSG00000013766.12	Ly6g6e	0.790166	0.651615	4.60776	0.0427701	0.751839
	ENSMUSG00000019851.9	Perp	0.787538	4.63006	5.86697	0.0238439	0.675704
	ENSMUSG00000021403.4	Serpinb9b	0.778626	-0.234334	12.4276	0.00184244	0.415968
	ENSMUSG00000058755.4	Osm	0.755208	1.27377	4.04727	0.056279	0.77337
	ENSMUSG00000069622.6	Gm10273	0.743556	2.23839	0.422338	0.522305	0.96544
	ENSMUSG00000037868.16	Egr2	0.740002	3.38675	4.03574	0.0566037	0.77337
	ENSMUSG00000033967.5	Rnf225	0.73997	1.74773	4.7996	0.0390204	0.737185
	ENSMUSG00000058427.11	Cxcl2	0.731312	-0.18368	1.32845	0.261093	0.914506
	ENSMUSG00000032033.12	Barx2	0.724391	1.86741	4.91369	0.0369665	0.73228
	ENSMUSG00000000982.6	Ccl3	0.720309	0.657149	2.99672	0.0970264	0.821595
	ENSMUSG00000057262.3	Rpl15-ps6	0.719171	0.583912	7.41524	0.0122201	0.629245
	ENSMUSG00000094845.3	Tmem95	0.711657	-0.437306	11.9268	0.00219243	0.43597
	ENSMUSG00000003032.9	Klf4	0.708079	7.24201	50.2333	3.4917e-07	0.00305506
	ENSMUSG00000041782.15	Lad1	0.702583	3.03544	5.39115	0.0295928	0.709023
	ENSMUSG00000021749.7	Fam3d	0.702375	0.879197	4.68735	0.0411672	0.743063
	ENSMUSG00000081058.6	H3c15	0.701191	0.920205	12.9449	0.00154411	0.403176
	ENSMUSG00000038751.6	Ptk6	0.695193	-0.0104068	4.42652	0.0466896	0.751839
	ENSMUSG00000033860.14	Fgg	0.694732	-0.330071	7.19564	0.0133962	0.632457
	ENSMUSG00000034282.4	Evpl	0.692296	4.63361	6.50584	0.0179877	0.656062
	ENSMUSG00000046352.8	Gjb2	0.674892	2.58946	4.86542	0.0378203	0.732909
	ENSMUSG00000089886.2	Gm16184	0.67326	-0.377771	9.29651	0.00575588	0.548168
	ENSMUSG00000021553.15	Slc28a3	0.664664	0.601501	4.87848	0.0375871	0.73228
	ENSMUSG00000055148.8	Klf2	0.664594	7.36282	39.1792	2.33662e-06	0.00681476
	ENSMUSG00000099556.3	Gm28857	0.663141	-0.108307	6.59219	0.017327	0.655321
	ENSMUSG00000091514.4	Gm17484	0.650645	0.669532	9.43313	0.00546164	0.541937
	ENSMUSG00000024922.3	Ovol1	0.647292	1.52399	5.66926	0.0260656	0.682267
	ENSMUSG00000030178.17	Klra13-ps	0.642714	-0.289734	6.80772	0.0157925	0.65138
	ENSMUSG00000031891.7	Hsd11b2	0.640464	0.395909	9.69099	0.00495032	0.539328
	ENSMUSG00000022768.18	Ccdc116	0.638766	0.0377564	19.7323	0.000192706	0.223545
	ENSMUSG00000001670.14	Tat	0.636556	-0.508563	7.97404	0.00971086	0.599509
	ENSMUSG00000039092.10	Sptlc3	0.635447	1.42803	5.03986	0.0348354	0.72769
	ENSMUSG00000098488.8	Pla2g4b	0.631634	2.87042	7.02211	0.0144143	0.638077
	ENSMUSG00000025064.16	Col17a1	0.628312	3.4137	7.45728	0.0120083	0.627174
	ENSMUSG00000076523.3	Igkv15-103	0.628031	1.19765	0.810988	0.377298	0.946475
	ENSMUSG00000036185.10	Sapcd1	0.626568	0.141386	10.8243	0.00324942	0.520496
	ENSMUSG00000060969.10	Irx1	0.619358	5.9605	42.0792	1.37445e-06	0.00514616
	ENSMUSG00000074625.12	Arhgap40	0.615981	0.591702	3.38212	0.0790456	0.804665
	ENSMUSG00000020609.15	Apob	0.61226	-0.247936	1.67098	0.209151	0.905199
	ENSMUSG00000026407.18	Cacna1s	0.608973	0.820795	2.53249	0.125377	0.849467
	ENSMUSG00000018126.16	Baiap2l2	0.607825	-0.385633	4.74952	0.0399623	0.737654
	ENSMUSG00000055978.6	Fut2	0.595984	0.9069	5.73169	0.0253401	0.681691
	ENSMUSG00000022382.16	Wnt7b	0.595308	2.51905	6.78875	0.0159213	0.65138
	ENSMUSG00000034919.3	Ttc22	0.592355	1.18401	3.79686	0.0638348	0.786573
	ENSMUSG00000027483.8	Bpifa1	0.590625	8.59805	0.943726	0.341576	0.943144
	ENSMUSG00000028967.11	Errfi1	0.589165	7.25665	19.1615	0.000226223	0.223545
	ENSMUSG00000037129.8	Tmprss13	0.585975	2.15395	6.54424	0.0176904	0.655321
	ENSMUSG00000076549.3	Igkv4-68	0.583673	-0.314703	1.12066	0.300929	0.935339
	ENSMUSG00000100220.2	Gm29331	0.57719	0.949505	3.44106	0.0766496	0.802467
	ENSMUSG00000039057.12	Myo16	0.576776	0.0604262	7.32361	0.0126963	0.629245
	ENSMUSG00000086006.4	Gm13293	0.576714	0.122371	8.10599	0.00920525	0.598575
	ENSMUSG00000070604.6	Vsig10l	0.576202	2.68278	4.73034	0.0403297	0.740347
	ENSMUSG00000047281.4	Sfn	0.576071	4.38669	3.63342	0.0693895	0.796512
	ENSMUSG00000043794.9	D830025C05Rik	0.572545	-0.274001	4.04021	0.0564775	0.77337
	ENSMUSG00000111497.2	Gm38431	0.570243	1.18843	4.23971	0.0511599	0.76313
	ENSMUSG00000063522.6	Ly6m	0.567502	1.1761	4.04072	0.0564633	0.77337
	ENSMUSG00000097970.2	Gm27028	0.566081	0.0658407	4.89699	0.0372594	0.73228
	ENSMUSG00000003665.8	Has1	0.561734	0.29203	5.50065	0.028144	0.699241
	ENSMUSG00000042064.14	Myo3b	0.555548	0.0383509	6.67749	0.0167007	0.65138
	ENSMUSG00000116594.2	ENSMUSG00000116594.2	0.55429	1.35712	8.09572	0.00924355	0.598575
	ENSMUSG00000112614.2	Gm9030	0.553096	0.639207	4.33468	0.0488297	0.752697
	ENSMUSG00000121339.1	ENSMUSG00000121339.1	0.552228	0.176609	1.18934	0.286921	0.928069
	ENSMUSG00000022596.4	Slurp1	0.551774	0.836115	3.02315	0.0956518	0.820335
	ENSMUSG00000030041.10	M1ap	0.551252	1.12681	3.73386	0.0659135	0.793612
	ENSMUSG00000102191.3	Gm36569	0.551167	0.060649	0.982019	0.332163	0.941249
	ENSMUSG00000112540.2	Gm47461	0.550096	-0.446949	5.53047	0.0277633	0.698215
	ENSMUSG00000003545.4	Fosb	0.546094	4.69225	0.521249	0.477693	0.963479
	ENSMUSG00000028464.17	Tpm2	0.544357	5.65001	3.46264	0.075793	0.802467
	ENSMUSG00000029838.12	Ptn	0.543488	0.664662	6.31883	0.0195166	0.659775
	ENSMUSG00000046186.9	Cd109	0.540786	1.35498	2.68907	0.114846	0.837719
	ENSMUSG00000048355.3	Arxes1	0.540311	0.555733	2.84043	0.10564	0.824443
	ENSMUSG00000044938.9	Klhl31	0.537181	0.260319	0.891181	0.355113	0.944739
	ENSMUSG00000106928.2	Gm43860	0.537014	0.834093	12.9577	0.00153744	0.403176
	ENSMUSG00000106905.2	Gm42741	0.529788	-0.134305	6.02153	0.0222538	0.666643
	ENSMUSG00000096459.2	Ighv9-3	0.528445	0.649768	0.762269	0.391776	0.948915
	ENSMUSG00000061068.8	Mcpt4	0.528293	0.267845	1.29984	0.266148	0.918375
	ENSMUSG00000096549.10	Prickle4	0.526049	0.0154504	5.2193	0.0320378	0.71631
	ENSMUSG00000092277.2	Gm19684	0.525974	-0.334738	6.85242	0.0154935	0.65138
	ENSMUSG00000034634.8	Ly6d	0.52489	3.88574	1.88244	0.183486	0.887704
	ENSMUSG00000102888.2	Ighv1-11	0.523949	0.772255	0.185274	0.670945	0.97542
	ENSMUSG00000057378.16	Ryr3	0.521571	0.566305	8.4994	0.00786242	0.587968
	ENSMUSG00000043419.12	Rnf227	0.520293	1.18493	3.7067	0.0668333	0.793612
	ENSMUSG00000021340.14	Gpld1	0.51505	3.2352	3.32561	0.0814247	0.806835
	ENSMUSG00000112500.2	4933411E08Rik	0.513831	-0.344804	6.35822	0.0191829	0.659775
	ENSMUSG00000042189.6	Tekt3	0.51176	-0.429971	7.3125	0.0127554	0.629245
	ENSMUSG00000087249.3	Gm16062	0.509935	0.707985	10.993	0.0030566	0.510658
	ENSMUSG00000087502.2	Gm16091	0.509526	1.66777	6.01973	0.0222716	0.666643
	ENSMUSG00000031284.17	Pak3	0.508654	0.0261918	4.63167	0.0422814	0.750102
	ENSMUSG00000039155.16	Cdh26	0.508191	1.69163	2.18929	0.15274	0.872747
	ENSMUSG00000120814.1	ENSMUSG00000120814.1	0.508015	-0.409239	5.34602	0.030214	0.713972
	ENSMUSG00000049939.7	Lrrc4	0.507607	0.0825122	5.7581	0.0250399	0.681691
	ENSMUSG00000117980.3	Gm30571	0.504978	1.94963	6.98978	0.0146133	0.642507
	ENSMUSG00000049699.5	Ucn2	0.504074	-0.482633	6.47213	0.0182531	0.657554
	ENSMUSG00000055301.9	Adh7	0.502002	3.50829	3.72706	0.0661425	0.793612
	ENSMUSG00000003469.10	Phyhip	0.499935	0.734961	2.29286	0.143792	0.866356
	ENSMUSG00000108955.2	Gm44775	0.492741	0.00732075	0.930154	0.345001	0.943456
	ENSMUSG00000027875.13	Hmgcs2	0.490917	5.63722	5.72012	0.0254728	0.681691
	ENSMUSG00000075027.12	4631405J19Rik	0.490676	-0.121828	4.95196	0.0363051	0.728659
	ENSMUSG00000025432.12	Avil	0.490129	0.690874	10.9862	0.00306413	0.510658
	ENSMUSG00000027107.4	Chrna1	0.489537	-0.359153	3.49718	0.0744451	0.80107
	ENSMUSG00000100747.5	1700084E18Rik	0.48715	-0.410599	8.81255	0.00694754	0.578929
	ENSMUSG00000027654.3	Fam83d	0.486752	0.340742	2.45205	0.131228	0.856529
	ENSMUSG00000102861.2	Gm37637	0.486448	0.566855	3.38794	0.0788052	0.803745
	ENSMUSG00000098573.2	Gm27232	0.483095	0.196628	1.86918	0.184976	0.888526
	ENSMUSG00000024136.15	Dnase1l2	0.473462	2.2976	7.14922	0.0136605	0.632457
	ENSMUSG00000063975.14	Slco1a5	0.470302	1.12593	3.88359	0.0610941	0.779087
	ENSMUSG00000006389.14	Mpl	0.46838	0.431781	3.11113	0.0912361	0.815792
	ENSMUSG00000037577.14	Ephx3	0.466771	1.59967	2.15822	0.155553	0.873263
	ENSMUSG00000110264.2	E330018M18Rik	0.465802	-0.184959	4.16092	0.0531891	0.77337
	ENSMUSG00000117592.2	Gm46603	0.465558	0.282288	6.2403	0.0202012	0.659775
	ENSMUSG00000118245.3	Gm30082	0.465196	-0.508875	4.26091	0.0506291	0.759881
	ENSMUSG00000055561.10	Spink5	0.465093	3.17138	1.53703	0.227743	0.906553
	ENSMUSG00000027022.15	Xirp2	0.464879	2.62595	0.647918	0.429222	0.955112
	ENSMUSG00000051627.4	H1f4	0.461837	0.465199	4.59691	0.0429941	0.751839
	ENSMUSG00000083669.6	Mif-ps4	0.461459	0.547403	5.8563	0.0239582	0.675704
	ENSMUSG00000030792.9	Dkkl1	0.461145	1.04524	3.21112	0.0865012	0.811159
	ENSMUSG00000072944.12	Nup62cl	0.460476	-0.258453	3.51044	0.0739349	0.80107
	ENSMUSG00000054662.9	Ano9	0.460325	1.98429	5.47087	0.02853	0.702555
	ENSMUSG00000115344.2	Gm49364	0.459532	0.618932	1.20678	0.283503	0.92646
	ENSMUSG00000029161.9	Cgref1	0.458818	-0.111857	1.69002	0.206665	0.905199
	ENSMUSG00000010538.15	Tsacc	0.456145	0.0148705	9.59662	0.00513106	0.539328
	ENSMUSG00000071568.6	Gm5874	0.451477	0.17516	9.72527	0.0048864	0.539328
	ENSMUSG00000052525.15	Spdya	0.448593	-0.449809	3.13076	0.0902835	0.813947
	ENSMUSG00000072972.4	Adam4	0.448108	-0.131038	5.17231	0.0327453	0.71631
	ENSMUSG00000042686.6	Jph1	0.446349	1.04401	2.34523	0.139507	0.865479
	ENSMUSG00000044528.6	Tram1l1	0.443025	-0.044228	7.26829	0.0129937	0.629245
	ENSMUSG00000078173.4	Lenep	0.442947	0.519266	1.55704	0.224837	0.905199
	ENSMUSG00000029321.2	Slc10a6	0.44235	4.32899	16.7341	0.000459989	0.281486
	ENSMUSG00000058260.3	Serpina9	0.441128	2.38551	2.30986	0.142384	0.866356
	ENSMUSG00000028860.14	Sytl1	0.438564	2.42963	2.91446	0.101454	0.824443
	ENSMUSG00000109061.2	Gm49320	0.437796	1.82534	0.857098	0.364306	0.944739
	ENSMUSG00000055333.15	Fat2	0.436356	2.62683	8.60041	0.00755355	0.587968
	ENSMUSG00000009075.3	Cabp7	0.436179	-0.488885	4.08796	0.0551498	0.77337
	ENSMUSG00000116811.2	Gm16385	0.43595	-0.0726854	1.25255	0.274787	0.922106
	ENSMUSG00000032591.16	Mst1	0.432325	1.15775	7.46155	0.011987	0.627174
	ENSMUSG00000074170.6	Plekhf1	0.431311	2.83783	13.7124	0.00119454	0.400582
	ENSMUSG00000103651.2	Gm37206	0.431063	1.34324	1.75659	0.198256	0.8982
	ENSMUSG00000038354.14	Ankrd35	0.430971	1.74672	3.34883	0.0804374	0.80585
	ENSMUSG00000083378.4	Gm13196	0.430039	-0.430123	5.38527	0.029673	0.709354
	ENSMUSG00000117393.3	Gm36279	0.426601	0.4703	5.05834	0.034535	0.72769
	ENSMUSG00000071573.16	Rnls	0.425802	0.562438	7.72387	0.0107559	0.599978
	ENSMUSG00000019577.7	Pdk4	0.424693	5.01899	1.23248	0.278566	0.922466
	ENSMUSG00000028031.7	Dkk2	0.424452	0.433441	2.05512	0.165347	0.874182
	ENSMUSG00000089809.10	Rasgef1b	0.424373	5.2714	41.7028	1.47041e-06	0.00514616
	ENSMUSG00000027456.9	Sdcbp2	0.42379	1.62056	4.50001	0.0450533	0.751839
	ENSMUSG00000072612.4	Gm10382	0.421687	0.849448	1.46042	0.239321	0.907312
	ENSMUSG00000026452.16	Syt2	0.420749	-0.343098	1.66145	0.210409	0.905199
	ENSMUSG00000097262.4	4933416M07Rik	0.418694	-0.395648	4.02859	0.0568061	0.77337
	ENSMUSG00000074653.11	ENSMUSG00000074653.11	0.416866	0.283302	3.99998	0.0576244	0.774078
	ENSMUSG00000073530.12	Pappa2	0.416728	-0.23953	3.03909	0.0948333	0.820335
	ENSMUSG00000095565.3	Ighv2-9-1	0.415053	0.416888	0.216942	0.645825	0.97542
	ENSMUSG00000028039.12	Efna3	0.41474	1.37799	3.11327	0.0911314	0.815792
	ENSMUSG00000037139.16	Myom3	0.413952	2.75697	3.69296	0.0673044	0.795553
	ENSMUSG00000028680.15	Plk3	0.413835	3.5729	9.95753	0.00447656	0.539328
	ENSMUSG00000010760.6	Phlda2	0.412252	-0.210212	3.80449	0.0635881	0.786573
	ENSMUSG00000029378.6	Areg	0.411933	1.90419	3.77783	0.0644547	0.788736
	ENSMUSG00000103030.2	E330011M16Rik	0.411724	-0.0562898	4.61868	0.0425462	0.751839
	ENSMUSG00000042510.8	AA986860	0.411687	6.36586	47.5636	5.37039e-07	0.00313255
	ENSMUSG00000103955.2	Gm37270	0.411398	0.479636	1.39208	0.250291	0.913858
	ENSMUSG00000106666.2	Gm43587	0.410619	-0.00643071	3.42397	0.0773356	0.802467
	ENSMUSG00000027555.9	Car13	0.410085	2.17973	4.33379	0.0488507	0.752697
	ENSMUSG00000110588.2	Gm45774	0.409525	-0.321758	1.35418	0.256654	0.914506
	ENSMUSG00000092395.2	Gm20463	0.409215	1.87332	7.9566	0.00977995	0.599509
	ENSMUSG00000042367.13	Gjb3	0.408514	0.766345	3.7289	0.0660804	0.793612
	ENSMUSG00000109953.2	5430430B14Rik	0.405979	0.817799	3.87576	0.0613361	0.779463
	ENSMUSG00000061080.12	Lsamp	0.405483	0.0838313	3.46461	0.0757153	0.802467
	ENSMUSG00000071112.13	Spx	0.403486	-0.00465437	5.68792	0.0258463	0.681691
	ENSMUSG00000106296.2	4632404M16Rik	0.402972	-0.198448	3.42337	0.0773599	0.802467
	ENSMUSG00000083169.2	Gm6580	0.402235	0.15878	5.24969	0.0315894	0.71631
	ENSMUSG00000029727.8	Cyp3a13	0.401697	2.4007	9.65169	0.00502471	0.539328
	ENSMUSG00000121028.1	ENSMUSG00000121028.1	0.400964	0.109481	3.54647	0.072569	0.80107
	ENSMUSG00000089727.3	Klra8	0.399745	1.01464	3.84541	0.0622837	0.784102
	ENSMUSG00000040287.10	Stac3	0.398829	0.515426	2.99824	0.0969468	0.821595
	ENSMUSG00000026628.14	Atf3	0.397142	4.15362	1.38614	0.251274	0.913858
	ENSMUSG00000022225.8	Cma1	0.397083	0.787238	3.34078	0.0807779	0.806508
	ENSMUSG00000045876.5	Pcdhb8	0.396098	0.981683	3.41867	0.0775497	0.802467
	ENSMUSG00000090698.3	Apold1	0.392898	2.19961	2.00857	0.170014	0.877861
	ENSMUSG00000046240.9	Hepacam	0.392553	2.15799	17.5884	0.000356421	0.278862
	ENSMUSG00000028186.15	Uox	0.39153	0.35983	2.66824	0.116185	0.839945
	ENSMUSG00000044471.14	Lncpint	0.391093	0.105545	9.43562	0.00741565	0.587968
	ENSMUSG00000023993.8	Treml1	0.390056	0.866349	2.61011	0.120021	0.844055
	ENSMUSG00000038980.2	Rbbp8nl	0.389456	0.308304	4.44653	0.0462376	0.751839
	ENSMUSG00000071192.7	Wfikkn1	0.386077	-0.123072	3.99624	0.0577324	0.774078
	ENSMUSG00000045502.7	Hcar2	0.385775	3.07274	6.33538	0.0193756	0.659775
	ENSMUSG00000081277.2	Gm15285	0.383872	-0.154649	3.25475	0.0845247	0.808692
	ENSMUSG00000021118.8	Plek2	0.382817	-0.093741	1.65297	0.211537	0.905199
	ENSMUSG00000030699.17	Tbx6	0.381641	2.0025	8.58529	0.00759893	0.587968
	ENSMUSG00000003271.18	Sult2b1	0.381332	1.4469	2.31614	0.141868	0.866356
	ENSMUSG00000090236.4	Car15	0.381143	1.48828	12.9354	0.00154911	0.403176
	ENSMUSG00000110737.3	4930444F02Rik	0.376761	0.0750758	2.14618	0.15666	0.873263
	ENSMUSG00000097675.4	1700101I11Rik	0.376296	0.307962	5.38925	0.0296186	0.709023
	ENSMUSG00000020656.17	Grhl1	0.375192	3.01629	5.17042	0.0327741	0.71631
	ENSMUSG00000023987.15	Pgc	0.3739	0.712535	1.88986	0.182658	0.886715
	ENSMUSG00000027831.10	Veph1	0.37369	1.19597	2.47209	0.129741	0.853507
	ENSMUSG00000094652.3	Ighv1-42	0.373	0.105078	0.153882	0.698517	0.979613
	ENSMUSG00000050765.4	Gm5084	0.371714	0.336273	5.54139	0.0276254	0.698215
	ENSMUSG00000045591.7	Olig3	0.370386	0.205573	1.51918	0.230376	0.906553
	ENSMUSG00000068964.6	Gm6361	0.369809	2.03383	0.330609	0.570965	0.971918
	ENSMUSG00000084792.2	1700056N10Rik	0.369686	-0.209664	1.90687	0.180777	0.885686
	ENSMUSG00000029055.18	Plch2	0.368675	3.63515	10.8282	0.0032448	0.520496
	ENSMUSG00000055560.9	Zfp459	0.367533	0.0828933	4.40192	0.0472521	0.751839
	ENSMUSG00000120926.1	ENSMUSG00000120926.1	0.367433	2.75592	14.9739	0.000793687	0.366484
	ENSMUSG00000006056.14	Calcoco2	0.36701	0.19626	3.08329	0.092607	0.816923
	ENSMUSG00000050071.9	Bex1	0.366194	0.711825	3.2511	0.0846882	0.809113
	ENSMUSG00000082530.2	Gm12168	0.366192	0.172845	3.65554	0.0686062	0.795965
	ENSMUSG00000042377.9	Fam83g	0.366164	2.80624	3.55784	0.0721439	0.801045
	ENSMUSG00000034308.14	Sdr42e1	0.366098	3.05285	2.59751	0.120871	0.844055
	ENSMUSG00000120792.1	ENSMUSG00000120792.1	0.365583	0.167821	3.17289	0.0882773	0.811159
	ENSMUSG00000035109.15	Shc4	0.36529	-0.226525	3.25277	0.0846131	0.809095
	ENSMUSG00000095258.4	Gm2163	0.364101	0.36912	0.599482	0.446778	0.958077
	ENSMUSG00000042672.16	Dcst1	0.363712	0.110927	2.94198	0.0999469	0.823927
	ENSMUSG00000090891.4	D6Ertd527e	0.363276	-0.126559	2.90576	0.101936	0.824443
	ENSMUSG00000085184.11	4933439K11Rik	0.363088	1.00543	4.59402	0.0430538	0.751839
	ENSMUSG00000063245.12	Zfp993	0.362698	-0.319273	1.25552	0.274234	0.922106
	ENSMUSG00000112478.2	Gm47761	0.362003	0.582316	1.53693	0.227759	0.906553
	ENSMUSG00000049709.5	Nlrp10	0.361071	1.19921	1.14627	0.295601	0.933818
	ENSMUSG00000030228.20	Pik3c2g	0.360645	0.229075	4.07295	0.0555633	0.77337
	ENSMUSG00000110697.3	Gm31718	0.359458	-0.394	3.58153	0.0712671	0.799147
	ENSMUSG00000066861.15	Oas1g	0.359128	1.65406	4.01707	0.0571341	0.77337
	ENSMUSG00000031636.8	Pdlim3	0.358996	3.79872	5.90808	0.0234089	0.675704
	ENSMUSG00000043029.3	Trpv3	0.358975	-0.335098	1.10703	0.303817	0.937886
	ENSMUSG00000002289.17	Angptl4	0.358327	5.65654	2.40956	0.134449	0.861535
	ENSMUSG00000108801.3	Gm39090	0.358272	-0.198617	4.45127	0.0461312	0.751839
	ENSMUSG00000043085.15	Tmem82	0.357818	2.58185	6.84239	0.0155601	0.65138
	ENSMUSG00000114369.3	Gm41077	0.357328	0.936645	3.67701	0.0678559	0.795553
	ENSMUSG00000096974.4	Gm26881	0.356609	-0.0251841	3.46748	0.0756026	0.802467
	ENSMUSG00000028794.14	A3galt2	0.354531	-0.321434	2.17576	0.153958	0.873263
	ENSMUSG00000083246.2	Gm11839	0.354125	0.244835	3.06014	0.0937654	0.81984
	ENSMUSG00000057657.5	Rps18-ps3	0.352107	1.11116	0.429345	0.518906	0.964784
	ENSMUSG00000028758.13	Kif17	0.351029	0.208995	3.59029	0.0709461	0.799147
	ENSMUSG00000059602.15	Syn3	0.35086	1.28067	4.6187	0.0425457	0.751839
	ENSMUSG00000038600.13	Atp6v0a4	0.350117	2.66303	9.04467	0.00634515	0.568861
	ENSMUSG00000102692.2	Dchs2	0.349598	-0.457763	1.42023	0.245695	0.907624
	ENSMUSG00000027485.16	Bpifb1	0.349562	6.80298	1.55219	0.225538	0.905199
	ENSMUSG00000086938.11	4930481A15Rik	0.348644	2.4056	4.09078	0.0550726	0.77337
	ENSMUSG00000046971.8	Pla2g4f	0.348433	3.07885	2.73201	0.112143	0.830719
	ENSMUSG00000120330.1	ENSMUSG00000120330.1	0.348082	0.0497243	4.79006	0.0391978	0.737185
	ENSMUSG00000048138.11	Dmrt2	0.347043	1.31397	1.58696	0.220579	0.905199
	ENSMUSG00000073408.3	Mucl3	0.346994	0.14716	5.29665	0.0309104	0.71631
	ENSMUSG00000069270.7	H2ac6	0.346821	0.0647946	3.68267	0.0676597	0.795553
	ENSMUSG00000015702.14	Anxa9	0.34663	2.9371	2.42336	0.133393	0.860999
	ENSMUSG00000001095.6	Slc13a2	0.34611	-0.167725	2.06611	0.164268	0.873901
	ENSMUSG00000073607.3	Gm10548	0.345654	-0.320698	2.18821	0.152836	0.872747
	ENSMUSG00000021263.12	Degs2	0.344969	0.236386	4.38427	0.0476606	0.751839
	ENSMUSG00000086926.3	Gm6226	0.344447	-0.454947	2.39011	0.135955	0.864353
	ENSMUSG00000044595.11	Dnd1	0.344434	0.497116	5.36204	0.0299918	0.711147
	ENSMUSG00000018924.7	Alox15	0.343658	1.34082	0.807532	0.378299	0.946475
	ENSMUSG00000113528.3	Gm32699	0.342557	-0.263632	3.4396	0.0767079	0.802467
	ENSMUSG00000023132.9	Gzma	0.342325	4.3958	5.89616	0.0235341	0.675704
	ENSMUSG00000030703.9	Gdpd3	0.34036	2.62486	8.04989	0.00941661	0.599509
	ENSMUSG00000049357.12	Brd8dc	0.340137	0.402014	4.92497	0.0367702	0.73228
	ENSMUSG00000108738.2	Gm44777	0.339406	1.90814	4.50342	0.044979	0.751839
	ENSMUSG00000030325.17	Klrb1c	0.33895	2.60398	6.65002	0.0168996	0.65138
	ENSMUSG00000072949.7	Acot1	0.338865	5.62215	5.14623	0.0331454	0.719617
	ENSMUSG00000035683.14	Melk	0.338338	0.899538	1.67092	0.209158	0.905199
	ENSMUSG00000026388.16	3110009E18Rik	0.337926	0.211753	4.13538	0.0538665	0.77337
	ENSMUSG00000006575.15	Rundc3a	0.33791	1.02867	9.62958	0.00506713	0.539328
	ENSMUSG00000027377.3	Mall	0.337515	3.23103	3.00423	0.0966334	0.820858
	ENSMUSG00000026582.8	Sele	0.337432	0.748745	1.30768	0.26475	0.91683
	ENSMUSG00000078639.2	Gm12695	0.337408	1.74363	2.84065	0.105628	0.824443
	ENSMUSG00000120261.1	ENSMUSG00000120261.1	0.337376	-0.417943	1.28248	0.269277	0.91941
	ENSMUSG00000061039.6	Or8b53	0.337092	0.943348	4.27118	0.050374	0.759459
	ENSMUSG00000117575.3	Gm36486	0.336929	0.557743	1.56608	0.223541	0.905199
	ENSMUSG00000099762.4	Gm21149	0.336883	0.946812	1.5524	0.225507	0.905199
	ENSMUSG00000047501.4	Cldn4	0.336273	2.84414	5.78003	0.0247938	0.681691
	ENSMUSG00000115539.2	Gm6997	0.336013	-0.0449546	2.39946	0.135228	0.863232
	ENSMUSG00000028378.7	Ptgr1	0.335475	4.77652	3.87171	0.0614616	0.78049
	ENSMUSG00000037463.15	Fbxo27	0.334307	0.527806	4.29077	0.0498917	0.758707
	ENSMUSG00000113640.2	Adat3	0.333451	0.140878	1.4112	0.247158	0.908809
	ENSMUSG00000103149.3	AA914427	0.332097	-0.437411	1.79777	0.193267	0.895845
	ENSMUSG00000048502.15	Duxbl1	0.33088	1.25298	2.66325	0.116509	0.839945
	ENSMUSG00000036964.15	Trim17	0.330078	0.990206	4.10311	0.0547361	0.77337
	ENSMUSG00000001420.14	Tmem79	0.329908	2.74056	2.97788	0.0980201	0.821595
	ENSMUSG00000047420.9	Fam180a	0.329311	1.68513	6.16945	0.0208419	0.661062
	ENSMUSG00000107546.2	Gm20560	0.328563	2.05203	4.98826	0.0356899	0.72769
	ENSMUSG00000090077.10	Lime1	0.328519	4.22999	25.5883	4.20478e-05	0.0735794
	ENSMUSG00000053310.12	Nrgn	0.327709	3.38979	5.84718	0.0240564	0.675704
	ENSMUSG00000086503.5	Xist	0.326083	8.48978	0.362626	0.553029	0.967409
	ENSMUSG00000033377.15	Palmd	0.325512	5.80974	12.009	0.00213027	0.43597
	ENSMUSG00000030324.9	Rho	0.323984	0.0972054	2.63747	0.118197	0.842155
	ENSMUSG00000032515.9	Csrnp1	0.323945	4.80577	6.09897	0.0215018	0.664395
	ENSMUSG00000119972.1	ENSMUSG00000119972.1	0.323705	0.448285	1.83589	0.188786	0.894277
	ENSMUSG00000091709.2	Gm17189	0.323228	-0.0101082	2.11372	0.159692	0.873263
	ENSMUSG00000001520.13	Nrip2	0.323078	-0.306138	2.83467	0.105975	0.824443
	ENSMUSG00000074472.11	Zfp872	0.322819	0.777213	3.59354	0.0708276	0.799147
	ENSMUSG00000056569.12	Mpz	0.322606	1.59558	1.18584	0.287615	0.928069
	ENSMUSG00000120227.1	ENSMUSG00000120227.1	0.322484	-0.370484	2.38521	0.136337	0.864403
	ENSMUSG00000030114.9	Klrg1	0.322439	0.76259	1.87948	0.183817	0.888336
	ENSMUSG00000035179.5	Ppp1r32	0.321996	2.60176	4.0769	0.0554542	0.77337
	ENSMUSG00000025665.18	Rps6ka6	0.321376	0.976927	5.71035	0.0255855	0.681691
	ENSMUSG00000032643.13	Fhl3	0.319974	2.02475	1.65148	0.211735	0.905199
	ENSMUSG00000085347.3	Hk1os	0.319383	-0.0644353	2.97963	0.0979271	0.821595
	ENSMUSG00000078722.3	ENSMUSG00000078722.3	0.318978	0.025979	3.58584	0.071109	0.799147
	ENSMUSG00000074577.10	Ripor3	0.317416	1.21266	3.87959	0.0612175	0.779087
	ENSMUSG00000070576.5	Mn1	0.317368	2.97215	12.0646	0.00208937	0.43597
	ENSMUSG00000039220.17	Ppp1r10	0.31676	5.9691	37.4208	3.26455e-06	0.00816092
	ENSMUSG00000040432.6	Ltb4r2	0.31587	-0.177611	1.20634	0.28359	0.92646
	ENSMUSG00000052572.20	Dlg2	0.315757	0.20051	0.810367	0.377478	0.946475
	ENSMUSG00000063903.6	Klk1	0.315746	0.137566	1.02703	0.321555	0.938637
	ENSMUSG00000076434.10	Wfdc3	0.315376	0.707759	2.78839	0.108705	0.824443
	ENSMUSG00000054364.6	Rhob	0.315338	7.59102	9.90772	0.00456115	0.539328
	ENSMUSG00000030433.16	Sbk2	0.315239	2.0182	0.351089	0.559363	0.967788
	ENSMUSG00000113894.2	Gm48838	0.315194	-0.195482	2.72734	0.112433	0.830852
	ENSMUSG00000090152.2	Gm16285	0.313875	-0.0939634	1.90953	0.180485	0.885255
	ENSMUSG00000093587.5	Gm20554	0.313776	2.27063	4.9999	0.035495	0.72769
	ENSMUSG00000036264.10	Fstl4	0.313247	0.287655	1.96421	0.17461	0.880609
	ENSMUSG00000035506.17	Slc12a8	0.312752	-0.327969	1.9077	0.180686	0.885686
	ENSMUSG00000097471.10	5830432E09Rik	0.312505	0.673934	3.35069	0.0803586	0.80585
	ENSMUSG00000109764.2	Klkb1	0.311613	0.820683	2.69721	0.114328	0.836556
	ENSMUSG00000046814.4	Gchfr	0.31039	-0.0234852	2.61736	0.119534	0.844055
	ENSMUSG00000110380.2	Gm45332	0.310224	2.43528	12.4287	0.00184177	0.415968
	ENSMUSG00000046337.18	Fam178b	0.309949	2.07208	5.64188	0.0263911	0.684835
	ENSMUSG00000022144.5	Gdnf	0.309674	3.92126	14.3191	0.000979382	0.371713
	ENSMUSG00000040740.8	Slc25a34	0.308607	1.86621	0.859984	0.363514	0.944739
	ENSMUSG00000039720.8	Got1l1	0.308258	0.0558654	0.973001	0.334347	0.942208
	ENSMUSG00000039457.5	Ppl	0.307958	7.12067	5.80218	0.0245477	0.680761
	ENSMUSG00000085081.3	Rptoros	0.307709	1.50824	3.04712	0.0944243	0.820335
	ENSMUSG00000060985.16	Tdrd5	0.306788	0.620817	2.31791	0.141723	0.866356
	ENSMUSG00000028655.12	Mfsd2a	0.306351	2.43325	2.78792	0.108733	0.824443
	ENSMUSG00000052392.6	Acot4	0.306085	-0.224281	1.2599	0.273421	0.921769
	ENSMUSG00000030862.14	Cpxm2	0.304503	1.47597	1.35663	0.256236	0.914506
	ENSMUSG00000073415.5	Gm10501	0.30429	0.294613	1.43695	0.243017	0.907517
	ENSMUSG00000043592.16	Unc5cl	0.304217	0.226216	2.13299	0.157884	0.873263
	ENSMUSG00000028167.16	Bdh2	0.304068	0.305354	2.587	0.121586	0.844055
	ENSMUSG00000026475.8	Rgs16	0.304034	0.456571	1.90458	0.181029	0.886077
	ENSMUSG00000045282.8	Tmem86b	0.303842	2.09086	11.4703	0.00257564	0.474434
	ENSMUSG00000120298.1	ENSMUSG00000120298.1	0.303524	0.525926	3.60969	0.0702412	0.797265
	ENSMUSG00000079110.13	Capn3	0.303072	0.278117	1.15404	0.294009	0.932332
	ENSMUSG00000096464.3	Ighv2-2	0.302635	0.265382	0.0987046	0.756263	0.983607
	ENSMUSG00000060981.8	H4c8	0.300825	0.896947	2.07462	0.163439	0.873901
	ENSMUSG00000092124.2	B930094E09Rik	0.300033	-0.268142	1.83439	0.188959	0.894277
	ENSMUSG00000000359.4	Rem1	0.299768	3.31303	6.6551	0.0168627	0.65138
	ENSMUSG00000089628.2	Gm9727	0.29976	0.303152	1.91537	0.179846	0.884272
	ENSMUSG00000046694.7	Tent5b	0.299702	3.74729	6.32984	0.0194227	0.659775
	ENSMUSG00000090257.2	Gm4524	0.299608	1.57409	3.55567	0.0722246	0.80107
	ENSMUSG00000067889.8	Sptbn2	0.297958	3.73931	5.63151	0.0265156	0.684835
	ENSMUSG00000063954.8	H2ac19	0.297645	3.49395	4.39789	0.0473452	0.751839
	ENSMUSG00000056073.17	Grik2	0.296787	0.329973	2.21085	0.150824	0.871044
	ENSMUSG00000111058.3	Gm36033	0.296478	2.31198	9.02697	0.00638899	0.568861
	ENSMUSG00000085743.2	8430419K02Rik	0.295376	-0.0585486	2.53362	0.125297	0.849467
	ENSMUSG00000051225.10	Fam83a	0.295371	0.142785	2.15079	0.156235	0.873263
	ENSMUSG00000106181.2	Gm9523	0.295347	1.11416	3.44547	0.0764734	0.802467
	ENSMUSG00000097327.9	E030030I06Rik	0.295041	0.771173	6.7576	0.0161354	0.65138
	ENSMUSG00000053208.11	Kat2b-ps	0.294447	0.134783	1.99307	0.171602	0.879052
	ENSMUSG00000057092.13	Fxyd3	0.294442	3.06763	3.6237	0.0697369	0.796512
	ENSMUSG00000089712.4	Gm15889	0.294402	2.10189	7.72839	0.0107359	0.599978
	ENSMUSG00000050241.9	Klre1	0.293876	0.926612	2.42248	0.13346	0.860999
	ENSMUSG00000031906.10	Smpd3	0.293819	2.49679	1.6074	0.217728	0.905199
	ENSMUSG00000028525.17	Pde4b	0.293239	6.98713	3.7811	0.0643477	0.788401
	ENSMUSG00000100162.3	Gm20687	0.293201	0.779378	0.640227	0.431936	0.955477
	ENSMUSG00000031431.14	Tsc22d3	0.293106	7.05828	12.8883	0.00157402	0.403176
	ENSMUSG00000046791.9	Riox1	0.292146	4.43292	16.4679	0.00049866	0.281486
	ENSMUSG00000110197.2	Gm45444	0.292027	-0.300179	3.37609	0.0850142	0.810249
	ENSMUSG00000037605.17	Adgrl3	0.291823	5.64462	6.38012	0.0190001	0.659775
	ENSMUSG00000025557.11	Slc15a1	0.291762	1.62056	3.38325	0.0789989	0.804657
	ENSMUSG00000028950.4	Tas1r1	0.290502	-0.340855	2.59904	0.120767	0.844055
	ENSMUSG00000001504.11	Irx2	0.289977	5.79412	18.069	0.000309569	0.25796
	ENSMUSG00000021696.10	Elovl7	0.289954	3.01458	5.43444	0.0290103	0.704094
	ENSMUSG00000050138.9	Kcnk12	0.289023	1.84864	3.38419	0.0789601	0.804657
	ENSMUSG00000108207.3	1810059H22Rik	0.288529	1.90828	4.74661	0.0400178	0.737654
	ENSMUSG00000085039.3	Gm15927	0.287805	-0.199016	2.43227	0.132716	0.859511
	ENSMUSG00000053358.3	Gm9905	0.287384	-0.122055	1.0558	0.315017	0.938637
	ENSMUSG00000111662.3	Gm7435	0.286773	-0.327096	2.29297	0.143783	0.866356
	ENSMUSG00000030683.12	Sez6l2	0.286652	0.538843	3.80953	0.0634257	0.786573
	ENSMUSG00000074067.10	Gm10619	0.286497	0.342797	3.17413	0.0882191	0.811159
	ENSMUSG00000106352.6	5033403H07Rik	0.286013	0.698987	2.83282	0.106082	0.824443
	ENSMUSG00000024793.15	Tnfrsf25	0.284972	2.019	7.47309	0.0119297	0.627174
	ENSMUSG00000045036.16	Tmem232	0.284535	3.14399	2.36567	0.137876	0.865127
	ENSMUSG00000117789.2	Gm50388	0.283837	1.07383	0.45292	0.507756	0.964784
	ENSMUSG00000063953.4	Amd2	0.283522	1.85875	4.27063	0.0503876	0.759459
	ENSMUSG00000076576.3	Igkv6-32	0.282382	1.03063	0.135682	0.71603	0.980472
	ENSMUSG00000074874.11	Ctla2b	0.282208	2.73637	5.72214	0.0254496	0.681691
	ENSMUSG00000120094.1	ENSMUSG00000120094.1	0.281529	0.250608	2.13626	0.157579	0.873263
	ENSMUSG00000114951.2	Gm20784	0.281484	0.926312	0.23881	0.629762	0.97542
	ENSMUSG00000029273.11	Sult1d1	0.280907	3.15447	1.47613	0.236886	0.907266
	ENSMUSG00000099553.3	Gm29538	0.280524	1.20084	3.95159	0.0590389	0.777159
	ENSMUSG00000093606.3	B130034C11Rik	0.279824	0.0969558	1.48133	0.236089	0.907179
	ENSMUSG00000025515.17	Muc2	0.278958	0.357674	2.08813	0.162133	0.873778
	ENSMUSG00000073733.5	Cplane2	0.278561	-0.262247	2.52673	0.125785	0.849467
	ENSMUSG00000005089.16	Slc1a2	0.278115	2.17832	3.15698	0.0890287	0.811485
	ENSMUSG00000112527.3	Gm35696	0.27807	1.86188	4.4994	0.0450667	0.751839
	ENSMUSG00000036856.5	Wnt4	0.277824	4.74943	4.12431	0.0541628	0.77337
	ENSMUSG00000097583.3	6430590A07Rik	0.277819	-0.41018	1.86823	0.185084	0.888698
	ENSMUSG00000045319.14	Proser2	0.277064	2.9872	7.86144	0.0101667	0.599978
	ENSMUSG00000045903.10	Npas4	0.276933	0.483888	1.38597	0.251302	0.913858
	ENSMUSG00000097339.6	Gm26671	0.276863	1.31435	5.91548	0.0233316	0.675704
	ENSMUSG00000037849.9	Ifi206	0.276652	3.64429	5.07194	0.0343157	0.727573
	ENSMUSG00000052387.17	Trpm3	0.27662	1.07216	4.32602	0.049037	0.752719
	ENSMUSG00000098424.2	Gm27202	0.275659	-0.0734671	1.57911	0.221686	0.905199
	ENSMUSG00000004864.14	Mapk13	0.274933	3.38986	5.89725	0.0235226	0.675704
	ENSMUSG00000028115.17	Bnipl	0.274774	2.73484	2.8816	0.103288	0.824443
	ENSMUSG00000001349.6	Cnn1	0.274605	4.68629	1.86204	0.185786	0.890017
	ENSMUSG00000040183.14	Ankrd6	0.274468	1.99011	6.4196	0.0186755	0.659775
	ENSMUSG00000120686.1	ENSMUSG00000120686.1	0.274451	1.19443	4.3807	0.0477437	0.751839
	ENSMUSG00000044633.5	B530045E10Rik	0.274404	1.5732	2.19816	0.151948	0.871323
	ENSMUSG00000097643.2	A130051J06Rik	0.274189	0.7728	3.58096	0.071288	0.799147
	ENSMUSG00000052353.14	Cemip	0.274133	0.130664	0.949228	0.3402	0.943144
	ENSMUSG00000033730.5	Egr3	0.273985	2.71768	0.871573	0.36036	0.944739
	ENSMUSG00000016624.16	Phf21b	0.273336	1.49864	4.13938	0.0537598	0.77337
	ENSMUSG00000116718.3	Gm49668	0.273085	2.25196	6.82525	0.0156745	0.65138
	ENSMUSG00000037780.4	Mbl1	0.27273	0.705388	2.17239	0.154263	0.873263
	ENSMUSG00000021594.12	Srd5a1	0.272206	1.44756	3.23637	0.0853511	0.810836
	ENSMUSG00000118841.1	Rn7s2	0.272169	2.74382	0.522281	0.477262	0.962993
	ENSMUSG00000118866.1	Rn7s1	0.272169	2.74382	0.522281	0.477262	0.962993
	ENSMUSG00000021983.17	Atp8a2	0.271952	0.414246	0.824007	0.373562	0.946266
	ENSMUSG00000113690.2	Gm36501	0.271451	-0.398704	1.4091	0.247499	0.909298
	ENSMUSG00000103983.2	Gm20045	0.271209	2.18667	1.94955	0.176161	0.880609
	ENSMUSG00000109367.2	Gm18782	0.271115	-0.288653	1.29621	0.266798	0.918375
	ENSMUSG00000097854.2	Gm26602	0.270437	2.15053	1.69629	0.205854	0.905199
	ENSMUSG00000120961.1	ENSMUSG00000120961.1	0.270241	-0.293438	2.92503	0.100872	0.824443
	ENSMUSG00000020826.10	Nos2	0.270099	2.60428	4.07233	0.0555806	0.77337
	ENSMUSG00000005628.13	Tmod4	0.269183	0.201116	1.66256	0.210262	0.905199
	ENSMUSG00000118088.2	Gm3815	0.268831	0.417048	3.33148	0.0811737	0.806508
	ENSMUSG00000029368.11	Alb	0.268497	-0.265128	1.97811	0.173154	0.879573
	ENSMUSG00000035211.11	Xrra1	0.268491	0.767571	2.19828	0.151937	0.871323
	ENSMUSG00000097715.5	Gpr137b-ps	0.268486	0.589503	0.0818565	0.777396	0.985666
	ENSMUSG00000098132.2	Rassf10	0.268434	2.02942	2.07167	0.163726	0.873901
	ENSMUSG00000054065.13	Pkp3	0.26816	4.34483	3.6637	0.0683199	0.795822
	ENSMUSG00000110631.2	Gm42047	0.267878	5.0371	1.26263	0.272915	0.921588
	ENSMUSG00000049134.16	Nrap	0.267579	2.84345	0.462224	0.503472	0.964784
	ENSMUSG00000039661.15	Dusp26	0.26727	1.17147	1.62709	0.215025	0.905199
	ENSMUSG00000109727.2	Gm45464	0.265487	0.462031	2.20737	0.151131	0.871158
	ENSMUSG00000092300.8	Cdk3	0.265113	-0.156499	3.15806	0.0889776	0.811485
	ENSMUSG00000100254.2	Trpc2	0.264301	-0.083447	0.0767276	0.784293	0.986582
	ENSMUSG00000086813.3	Gm13657	0.264202	-0.193728	1.36624	0.254607	0.914506
	ENSMUSG00000105692.2	Gm43737	0.264167	3.54201	11.933	0.00218769	0.43597
	ENSMUSG00000021815.5	Mss51	0.263803	0.370768	2.32603	0.14106	0.866356
	ENSMUSG00000097087.2	Gm26878	0.263626	2.40624	4.72666	0.0404007	0.740347
	ENSMUSG00000022464.15	Slc38a4	0.262437	3.73801	4.32798	0.04899	0.752697
	ENSMUSG00000089797.2	Gm16118	0.261962	-0.116984	1.6852	0.207291	0.905199
	ENSMUSG00000055125.8	M5C1000I18Rik	0.261787	-0.119785	0.524155	0.476482	0.962812
	ENSMUSG00000064354.1	mt-Co2	0.261322	6.64795	1.1597	0.292857	0.932156
	ENSMUSG00000078810.5	Gp6	0.261203	0.891403	0.977195	0.333329	0.941249
	ENSMUSG00000051111.17	Sv2c	0.260637	0.171557	1.10606	0.304025	0.937886
	ENSMUSG00000121026.1	ENSMUSG00000121026.1	0.260579	-0.287297	1.48318	0.235804	0.907179
	ENSMUSG00000067704.2	Wfdc13	0.259879	0.631707	0.701464	0.411037	0.953818
	ENSMUSG00000086229.4	Gm4887	0.259875	1.10494	6.027	0.0221997	0.666643
	ENSMUSG00000087623.2	Gm12404	0.259762	1.12561	4.18165	0.0526464	0.772192
	ENSMUSG00000046828.4	Mettl21e	0.259682	-0.130833	1.22659	0.279687	0.922466
	ENSMUSG00000005917.16	Otx1	0.259269	1.06244	0.7884	0.383911	0.94726
	ENSMUSG00000006642.4	Tcf23	0.258992	2.45183	1.15061	0.294711	0.932832
	ENSMUSG00000103260.2	Gm8146	0.258448	-0.0265008	1.63977	0.213307	0.905199
	ENSMUSG00000029503.17	P2rx2	0.258121	-0.0485278	1.48895	0.234924	0.907179
	ENSMUSG00000115196.2	Gm6212	0.258114	0.450142	1.58587	0.220733	0.905199
	ENSMUSG00000074981.15	Dcdc5	0.258057	0.220403	1.85066	0.187084	0.892414
	ENSMUSG00000046818.8	Ddit4l	0.257839	2.33917	2.03411	0.167434	0.874697
	ENSMUSG00000117814.2	Gm50431	0.257333	2.68195	8.74559	0.00713283	0.583258
	ENSMUSG00000029005.5	Draxin	0.257238	0.398795	1.54461	0.226638	0.905199
	ENSMUSG00000061878.17	Sphk1	0.257204	5.32392	7.17567	0.0135091	0.632457
	ENSMUSG00000050944.15	Efcab5	0.256258	0.919407	2.80511	0.107709	0.824443
	ENSMUSG00000024526.10	Cidea	0.256178	1.5137	0.404413	0.531189	0.966777
	ENSMUSG00000036931.16	Nfkbid	0.255441	2.73928	1.87784	0.184001	0.888421
	ENSMUSG00000029869.8	Ephb6	0.255384	3.63109	7.10842	0.0138976	0.633317
	ENSMUSG00000109198.2	D7Bwg0826e	0.255303	1.02817	4.87969	0.0375655	0.73228
	ENSMUSG00000082674.2	Gm11914	0.254687	1.40692	3.16846	0.0884855	0.811159
	ENSMUSG00000005547.15	Cyp2a5	0.254499	5.73193	0.466304	0.501613	0.964784
	ENSMUSG00000047230.7	Cldn2	0.254379	0.0311969	1.13732	0.297448	0.933945
	ENSMUSG00000042745.10	Id1	0.254181	5.90406	5.89153	0.0235829	0.675704
	ENSMUSG00000032719.5	Sbspon	0.254099	0.204362	1.67702	0.208358	0.905199
	ENSMUSG00000117613.3	Gm2629	0.254083	-0.27283	1.38896	0.250806	0.913858
	ENSMUSG00000022018.8	Rgcc	0.253534	5.61939	4.2347	0.0512864	0.763472
	ENSMUSG00000097286.4	Gm26684	0.253441	0.263237	2.86158	0.104424	0.824443
	ENSMUSG00000098183.2	Gm27010	0.253316	-0.062976	1.04299	0.317904	0.938637
	ENSMUSG00000102827.2	Gm8242	0.252511	0.540159	2.92843	0.100686	0.824443
	ENSMUSG00000021303.15	Gng4	0.252439	0.577113	1.18526	0.287729	0.928069
	ENSMUSG00000084793.2	Gm2568	0.252387	-0.344839	1.37756	0.252704	0.914262
	ENSMUSG00000097217.4	Gm26549	0.252356	0.604302	1.68131	0.207798	0.905199
	ENSMUSG00000032348.7	Gsta4	0.252303	5.74683	2.75389	0.110793	0.827474
	ENSMUSG00000038167.7	Plekhg6	0.252	2.00921	3.19426	0.0872795	0.811159
	ENSMUSG00000078597.3	Cyp4a12b	0.251937	1.57422	0.569048	0.458404	0.958817
	ENSMUSG00000109564.2	Muc16	0.25181	3.90535	3.51621	0.0737141	0.80107
	ENSMUSG00000114278.3	Gm49027	0.251588	1.29144	2.42812	0.133031	0.860337
	ENSMUSG00000039065.12	Atpsckmt	0.251579	3.0268	4.74969	0.0399589	0.737654
	ENSMUSG00000028348.8	Cavin4	0.251221	0.967853	0.614815	0.441099	0.958077
	ENSMUSG00000015652.10	Steap1	0.251203	0.156109	1.58629	0.220674	0.905199
	ENSMUSG00000085124.2	Gm12766	0.251141	-0.341592	1.1525	0.294325	0.932352
	ENSMUSG00000053475.6	Tnfaip6	0.250999	-0.112126	1.41903	0.245889	0.907624
	ENSMUSG00000045257.11	Morn2	0.250872	2.59004	5.52032	0.0278922	0.699241
	ENSMUSG00000117285.2	Gm49863	0.250752	0.0319459	2.51211	0.126829	0.850339
	ENSMUSG00000024386.10	Proc	0.250683	0.0434691	1.09057	0.307356	0.938487
	ENSMUSG00000031297.15	Slc7a3	0.249982	0.470587	2.22461	0.149615	0.870726
	ENSMUSG00000114871.2	Gm21370	0.249843	0.873116	2.32352	0.141265	0.866356
	ENSMUSG00000120289.1	ENSMUSG00000120289.1	0.249532	-0.201444	1.74334	0.199895	0.900376
	ENSMUSG00000013338.17	Fer1l4	0.249421	1.48959	2.21418	0.15053	0.870726
	ENSMUSG00000027489.16	Necab3	0.249313	-0.0923719	1.72117	0.202675	0.905199
	ENSMUSG00000029410.12	Ppef2	0.249202	0.441368	3.08858	0.0923448	0.816813
	ENSMUSG00000071637.6	Cebpd	0.249008	5.60314	3.01201	0.0962284	0.820335
	ENSMUSG00000114442.2	F630042J09Rik	0.248674	1.04486	3.14248	0.0897199	0.812544
	ENSMUSG00000036196.17	Slc26a8	0.248571	0.089284	1.73445	0.201004	0.902262
	ENSMUSG00000031554.19	Adam5	0.24792	0.132072	2.51546	0.126589	0.849473
	ENSMUSG00000059031.4	Or5p58	0.247866	-0.32998	0.892443	0.354779	0.944739
	ENSMUSG00000078485.5	Plekhn1	0.247742	4.31517	2.5228	0.126065	0.849467
	ENSMUSG00000050520.5	Cldn8	0.247626	1.85446	3.49791	0.0744168	0.80107
	ENSMUSG00000025983.12	Ccdc150	0.247167	1.66535	2.45387	0.131092	0.855962
	ENSMUSG00000026343.7	Gpr39	0.247075	2.51563	3.61213	0.070153	0.797265
	ENSMUSG00000000223.14	Drp2	0.24685	0.142491	0.723488	0.403899	0.950615
	ENSMUSG00000051177.17	Plcb1	0.2463	4.74411	2.68453	0.115136	0.838346
	ENSMUSG00000094446.2	Gm6344	0.246119	1.31556	0.461474	0.503815	0.964784
	ENSMUSG00000010830.9	Kdelr3	0.245699	3.56779	4.1316	0.0539675	0.77337
	ENSMUSG00000015467.15	Egfl8	0.245386	1.30944	4.08706	0.0551745	0.77337
	ENSMUSG00000039238.7	Zfp750	0.245361	2.67318	1.32717	0.261317	0.914648
	ENSMUSG00000022468.13	Endou	0.245302	3.28525	1.82452	0.190109	0.894277
	ENSMUSG00000030017.3	Reg3g	0.244969	5.20166	0.454199	0.507164	0.964784
	ENSMUSG00000039648.15	Kyat1	0.244798	4.08342	2.88496	0.103098	0.824443
	ENSMUSG00000105746.2	Gm43595	0.244479	1.66522	5.11531	0.033627	0.724879
	ENSMUSG00000074491.10	Clec4g	0.244462	0.799732	1.55146	0.225643	0.905199
	ENSMUSG00000024481.6	Lvrn	0.244384	1.06047	2.11713	0.15937	0.873263
	ENSMUSG00000118125.2	Gm50387	0.24418	3.18359	7.79346	0.0104532	0.599978
	ENSMUSG00000016526.9	Dyrk3	0.244126	2.44587	4.44041	0.0463752	0.751839
	ENSMUSG00000020807.16	ENSMUSG00000020807.16	0.243594	3.64709	0.745888	0.396829	0.950294
	ENSMUSG00000078252.2	Krtap17-1	0.243504	0.543341	1.34323	0.258531	0.914506
	ENSMUSG00000113184.2	Gm49654	0.243498	2.70877	7.18139	0.0134766	0.632457
	ENSMUSG00000057606.15	Colq	0.243443	5.5587	4.7112	0.0407002	0.740347
	ENSMUSG00000105265.7	Sox2ot	0.242949	0.0366183	0.798462	0.380944	0.946475
	ENSMUSG00000028801.15	Stpg1	0.24247	1.92301	1.83974	0.18834	0.894132
	ENSMUSG00000096141.3	Dnah7a	0.2424	2.54278	2.36535	0.137901	0.865127
	ENSMUSG00000047228.10	A2ml1	0.242302	4.96534	0.614605	0.441176	0.958077
	ENSMUSG00000000317.12	Bcl6b	0.241988	5.59418	9.54749	0.00522803	0.539328
	ENSMUSG00000054889.11	Dsp	0.241593	6.56015	2.21711	0.150273	0.870726
	ENSMUSG00000053560.6	Ier2	0.241563	6.11468	0.675444	0.419722	0.954851
	ENSMUSG00000024810.17	Il33	0.241439	6.35634	11.0724	0.0029702	0.510658
	ENSMUSG00000064023.5	Klk8	0.241407	3.12955	2.32413	0.141215	0.866356
	ENSMUSG00000025735.14	Rhbdl1	0.241287	0.901855	1.90018	0.181514	0.886077
	ENSMUSG00000093424.5	6330562C20Rik	0.241212	0.0538689	1.57854	0.221767	0.905199
	ENSMUSG00000020427.12	Igfbp3	0.241193	7.44011	4.31187	0.049378	0.754048
	ENSMUSG00000058812.3	0610039K10Rik	0.24115	-0.00589821	1.53057	0.228692	0.906553
	ENSMUSG00000015437.6	Gzmb	0.241049	2.48924	2.01032	0.169835	0.877861
	ENSMUSG00000112388.3	AI463170	0.240971	-0.0671901	1.59663	0.219225	0.905199
	ENSMUSG00000097397.3	Gm16861	0.240118	1.50615	3.45977	0.0759062	0.802467
	ENSMUSG00000116270.2	Gm1600	0.240112	0.301951	1.85591	0.186483	0.891791
	ENSMUSG00000042942.19	Greb1l	0.239846	0.307072	2.21615	0.150357	0.870726
	ENSMUSG00000086328.3	2700033N17Rik	0.239676	-0.0155178	2.34544	0.13949	0.865479
	ENSMUSG00000026819.16	Slc25a25	0.239553	5.18527	10.8882	0.00317481	0.520496
	ENSMUSG00000046991.13	Wdr27	0.239492	1.75826	2.79971	0.108029	0.824443
	ENSMUSG00000023067.15	Cdkn1a	0.239437	5.92035	3.68781	0.0674818	0.795553
	ENSMUSG00000040840.8	4930579G18Rik	0.239211	0.460054	1.6297	0.21467	0.905199
	ENSMUSG00000025936.18	ENSMUSG00000025936.18	0.239124	1.07098	0.0634359	0.803415	0.987971
	ENSMUSG00000039672.13	Kcne2	0.239026	4.5371	5.00545	0.0354026	0.72769
	ENSMUSG00000114687.2	Gm5452	0.238992	1.15586	2.50584	0.12728	0.850659
	ENSMUSG00000031886.15	Ces2e	0.238733	2.39481	3.50883	0.0739968	0.80107
	ENSMUSG00000006777.8	Krt23	0.238086	4.31309	3.48044	0.0750951	0.802467
	ENSMUSG00000016255.6	Tubb1	0.23733	3.37806	1.02001	0.323178	0.938637
	ENSMUSG00000027344.15	Fsip1	0.237233	1.8504	3.21208	0.0864572	0.811159
	ENSMUSG00000051910.14	Sox6	0.237209	2.29708	3.91152	0.0602404	0.778431
	ENSMUSG00002076852.1	Gm55523	0.237034	0.360618	0.148448	0.703616	0.979613
	ENSMUSG00000026065.9	Slc9a4	0.237001	2.15893	3.91323	0.0601885	0.778431
	ENSMUSG00000025257.6	Ribc1	0.23696	1.66464	3.83344	0.0626622	0.785163
	ENSMUSG00000021573.16	Tppp	0.236954	5.5173	9.9887	0.00442449	0.539328
	ENSMUSG00000047040.10	Prr15l	0.236925	5.96878	26.1137	3.70378e-05	0.0735794
	ENSMUSG00000048647.10	Exd1	0.236782	0.981593	1.77936	0.195478	0.898173
	ENSMUSG00000115018.3	ENSMUSG00000115018.3	0.236708	3.27093	4.97295	0.0359479	0.728659
	ENSMUSG00000066878.6	Gm10184	0.236691	3.7445	12.7366	0.00165737	0.403821
	ENSMUSG00000036040.15	Adamtsl2	0.236492	6.08975	2.35808	0.138479	0.865479
	ENSMUSG00000028331.13	Trmo	0.236204	2.3919	4.93308	0.0366296	0.73228
	ENSMUSG00000008601.13	Rab25	0.235966	4.74203	4.16647	0.0530431	0.77337
	ENSMUSG00000026726.11	Cubn	0.235339	-0.183747	1.35277	0.256894	0.914506
	ENSMUSG00000044086.9	Lmod3	0.235289	0.708838	0.298892	0.589921	0.972677
	ENSMUSG00000066191.13	Anks6	0.234975	2.90733	5.5299	0.0277706	0.698215
	ENSMUSG00000103114.2	Gm32200	0.234845	2.33696	5.42078	0.0291926	0.707538
	ENSMUSG00000113346.4	Eprn	0.234674	-0.278798	1.32448	0.261787	0.914993
	ENSMUSG00000024900.6	Cpt1a	0.23458	7.64561	8.11835	0.0091594	0.598575
	ENSMUSG00000109428.2	Gm45698	0.23457	-0.170193	0.841264	0.368693	0.944759
	ENSMUSG00000085828.2	Gm15612	0.234192	0.584942	2.36389	0.138017	0.865127
	ENSMUSG00000056671.8	Prelid2	0.234179	0.468579	2.88111	0.103316	0.824443
	ENSMUSG00000010651.5	Acaa1b	0.23405	2.6837	2.26228	0.146367	0.866763
	ENSMUSG00000025981.14	Coq10b	0.234029	4.36317	2.6036	0.120459	0.844055
	ENSMUSG00000102976.7	Zc3h11a	0.233836	6.65467	1.38196	0.251969	0.913858
	ENSMUSG00000032712.17	Resf1	0.233755	6.49977	8.30357	0.00850165	0.597116
	ENSMUSG00000086549.2	Gm13648	0.233552	2.24094	4.08305	0.0552849	0.77337
	ENSMUSG00000022012.10	Enox1	0.233427	-0.30016	1.3556	0.256411	0.914506
	ENSMUSG00000114858.2	Gm5790	0.233345	2.19044	2.34531	0.1395	0.865479
	ENSMUSG00000097537.4	2610020C07Rik	0.232752	0.479992	1.67828	0.208192	0.905199
	ENSMUSG00000116116.2	Gm671	0.232702	0.850532	3.0874	0.0924034	0.816813
	ENSMUSG00000116215.2	Gm5470	0.23268	0.901871	3.22087	0.0860549	0.811159
	ENSMUSG00000063296.6	Tmem117	0.232654	1.65669	3.18652	0.0876392	0.811159
	ENSMUSG00000005148.9	Klf5	0.232561	5.45252	15.3454	0.000705715	0.343036
	ENSMUSG00000085733.2	Arhgap27os1	0.232427	0.254134	1.47634	0.236855	0.907266
	ENSMUSG00000120401.1	ENSMUSG00000120401.1	0.232252	1.0581	2.06166	0.164705	0.874182
	ENSMUSG00000032773.10	Chrm1	0.232241	0.812585	1.88675	0.183004	0.886903
	ENSMUSG00000079737.6	ENSMUSG00000079737.6	0.232191	1.36725	3.89991	0.0605935	0.778745
	ENSMUSG00000087684.2	1200007C13Rik	0.231682	0.592792	1.42912	0.244267	0.907517
	ENSMUSG00000052229.6	Gpr17	0.231317	2.92547	9.71191	0.0049112	0.539328
	ENSMUSG00000036181.3	H1f2	0.230932	5.72207	8.25311	0.00867554	0.597116
	ENSMUSG00000085174.2	Gm16206	0.230914	-0.470953	1.43485	0.243351	0.907517
	ENSMUSG00000073680.3	Tmem88b	0.230818	0.405604	1.59565	0.219362	0.905199
	ENSMUSG00000072214.8	ENSMUSG00000072214.8	0.230709	3.66149	1.84548	0.187679	0.893403
	ENSMUSG00000045238.10	A730035I17Rik	0.230312	-0.385973	0.597911	0.447366	0.958077
	ENSMUSG00000024427.8	Spry4	0.230131	5.18066	8.89094	0.00673734	0.575106
	ENSMUSG00000018916.6	Csf2	0.230114	0.718044	1.64313	0.212854	0.905199
	ENSMUSG00000025938.17	Slco5a1	0.230078	2.37945	3.40762	0.0779984	0.802467
	ENSMUSG00000017607.10	Tns4	0.229794	1.42412	0.870059	0.36077	0.944739
	ENSMUSG00000090031.4	4732440D04Rik	0.229644	2.99102	1.34235	0.258682	0.914506
	ENSMUSG00000032942.15	Ucp3	0.229605	2.55121	1.58843	0.220373	0.905199
	ENSMUSG00000120945.1	ENSMUSG00000120945.1	0.229599	-0.19723	1.08019	0.309616	0.938487
	ENSMUSG00000024842.9	Cabp4	0.229552	-0.283787	1.21917	0.281109	0.924525
	ENSMUSG00000022893.15	Adamts1	0.229335	7.11621	4.97363	0.0359363	0.728659
	ENSMUSG00000020072.16	Pbld2	0.229304	1.87606	3.35657	0.0801111	0.805776
	ENSMUSG00000073437.12	D330041H03Rik	0.228294	3.96954	2.12149	0.15896	0.873263
	ENSMUSG00000010136.15	Pifo	0.228039	3.23562	3.94913	0.0591119	0.777159
	ENSMUSG00000022408.8	Fam83f	0.227971	0.780848	1.54509	0.226568	0.905199
	ENSMUSG00000061576.16	Dpp6	0.227724	1.49671	0.858301	0.363975	0.944739
	ENSMUSG00000097253.3	Gm26770	0.227548	0.995164	2.76577	0.110069	0.825983
	ENSMUSG00000052684.5	Jun	0.227539	8.56157	1.43363	0.243547	0.907517
	ENSMUSG00000043773.6	1700048O20Rik	0.227405	0.456151	0.439209	0.514188	0.964784
	ENSMUSG00000110427.2	4933406B17Rik	0.227079	2.6233	3.45685	0.0760216	0.802467
	ENSMUSG00000033024.17	Klra9	0.227056	0.733986	1.38198	0.251967	0.913858
	ENSMUSG00000102805.6	Gm37240	0.2267	2.01246	0.765155	0.390895	0.9488
	ENSMUSG00000096458.8	Moap1	0.226679	2.50059	5.45958	0.0286779	0.703772
	ENSMUSG00000027360.6	Hdc	0.226276	6.51061	14.77	0.000847001	0.370542
	ENSMUSG00000008129.15	Brme1	0.225934	0.221826	1.64844	0.212143	0.905199
	ENSMUSG00000039391.12	Ccdc81	0.225745	3.12059	2.91241	0.101567	0.824443
	ENSMUSG00000109904.2	Gm45819	0.225664	1.23946	3.18657	0.0876371	0.811159
	ENSMUSG00000114515.3	ENSMUSG00000114515.3	0.225147	-0.477532	1.46149	0.239155	0.907312
	ENSMUSG00000058159.15	T2	0.224904	2.55894	2.24703	0.147672	0.869589
	ENSMUSG00000103046.2	Gm37309	0.224901	1.19809	1.1621	0.292371	0.932011
	ENSMUSG00000058581.8	Gm5801	0.224595	1.43737	3.05225	0.0941641	0.820335
	ENSMUSG00000037973.7	Itprid1	0.224573	3.76946	6.51646	0.0179049	0.655476
	ENSMUSG00000085355.3	3010003L21Rik	0.224463	0.593097	1.48152	0.23606	0.907179
	ENSMUSG00000034311.4	Kif4	0.224447	2.11328	1.78487	0.194812	0.897118
	ENSMUSG00000024352.13	Spata24	0.224287	2.59482	2.59581	0.120987	0.844055
	ENSMUSG00000067878.14	Map7d3	0.224051	0.860027	2.5897	0.121403	0.844055
	ENSMUSG00000108601.2	Gm44645	0.223777	0.0520874	2.97912	0.115581	0.838346
	ENSMUSG00000025140.16	Pycr1	0.22348	1.4377	3.06274	0.0936347	0.81984
	ENSMUSG00000039377.8	Hlx	0.223228	5.04281	4.51849	0.0446522	0.751839
	ENSMUSG00000097440.3	Gm6277	0.222928	1.6086	4.5108	0.0448188	0.751839
	ENSMUSG00000106933.2	Gm43621	0.222863	1.05996	2.47263	0.1297	0.853507
	ENSMUSG00000101304.3	Plet1os	0.222822	0.110271	1.89682	0.181886	0.886579
	ENSMUSG00000036578.8	Fxyd7	0.222311	1.00436	2.04181	0.166665	0.874435
	ENSMUSG00000097321.7	1700028E10Rik	0.222244	1.44411	2.97627	0.0981055	0.821595
	ENSMUSG00000072770.10	Acrbp	0.222024	2.95282	10.2486	0.00401536	0.528755
	ENSMUSG00000028158.15	Mttp	0.221911	2.23521	5.51574	0.0279507	0.699241
	ENSMUSG00000113262.2	Gm48551	0.221764	1.74059	4.45503	0.046047	0.751839
	ENSMUSG00000030587.6	2200002D01Rik	0.22162	3.15903	5.79693	0.0246058	0.681294
	ENSMUSG00000086389.2	Gm15998	0.221456	2.30138	3.99465	0.0577783	0.774078
	ENSMUSG00000015451.17	C4a	0.221442	0.646328	1.74259	0.199989	0.900566
	ENSMUSG00000032783.10	Troap	0.221349	0.267685	0.4271	0.519991	0.964784
	ENSMUSG00000000078.8	Klf6	0.220864	7.67427	8.81575	0.00693881	0.578929
	ENSMUSG00000069011.6	Gm10254	0.220445	3.51049	9.11494	0.00617432	0.563039
	ENSMUSG00000066553.6	Gm6969	0.220387	3.62141	7.25742	0.0130531	0.629245
	ENSMUSG00000000308.15	Ckmt1	0.220381	4.03227	2.58957	0.121411	0.844055
	ENSMUSG00000071532.7	Gm10335	0.22022	4.08978	0.120576	0.731614	0.981701
	ENSMUSG00000091742.3	Gm5093	0.219803	-0.0327804	0.546038	0.467525	0.960351
	ENSMUSG00000048442.16	Smim5	0.219519	3.68249	7.31377	0.0127487	0.629245
	ENSMUSG00000111933.2	Gm36660	0.219475	1.47913	2.4011	0.135101	0.862825
	ENSMUSG00000099241.3	Gvin-ps2	0.219178	1.76398	0.175558	0.679163	0.976473
	ENSMUSG00000100707.2	Gm28523	0.218664	2.37365	4.71247	0.0406755	0.740347
	ENSMUSG00000097170.2	Gm16982	0.218562	-0.0270317	1.6619	0.210349	0.905199
	ENSMUSG00000120022.1	ENSMUSG00000120022.1	0.218367	-0.372994	1.26966	0.27162	0.920364
	ENSMUSG00000083083.2	Gm15382	0.218114	0.449695	2.09998	0.160997	0.873263
	ENSMUSG00000029360.4	Gm9754	0.217962	0.352914	1.2134	0.28222	0.926414
	ENSMUSG00000107306.2	Gm42577	0.217909	-0.306596	1.21909	0.281124	0.924525
	ENSMUSG00000034212.15	Ankmy1	0.217745	2.22146	0.99806	0.328328	0.940355
	ENSMUSG00000070529.8	Wfdc10	0.21745	-0.206462	0.507892	0.483326	0.964453
	ENSMUSG00000037386.17	Rims2	0.217392	0.36734	0.388655	0.539231	0.967409
	ENSMUSG00000115852.4	Gm52969	0.217372	1.24392	1.70574	0.204639	0.905199
	ENSMUSG00000031847.9	1700030J22Rik	0.217306	2.11691	3.97943	0.0582203	0.774162
	ENSMUSG00000083557.2	Gm6877	0.217111	0.859713	2.26999	0.145712	0.866559
	ENSMUSG00000120594.1	ENSMUSG00000120594.1	0.216918	-0.352807	1.26723	0.272067	0.920872
	ENSMUSG00000031710.5	Ucp1	0.216745	0.153603	0.0429218	0.837723	0.989882
	ENSMUSG00000005483.11	Dnajb1	0.216469	5.54115	4.012	0.0572788	0.77337
	ENSMUSG00000108702.2	Gm9333	0.216437	1.13062	3.40879	0.0779511	0.802467
	ENSMUSG00000075410.14	Prcd	0.216235	0.740942	3.11196	0.0911955	0.815792
	ENSMUSG00000018554.14	Ybx2	0.215997	0.807637	0.864067	0.362398	0.944739
	ENSMUSG00000032010.16	Usp2	0.215836	3.73583	2.77774	0.109344	0.824443
	ENSMUSG00000055976.7	Cldn23	0.215412	2.63798	2.24095	0.148196	0.870044
	ENSMUSG00000036492.13	Rnf39	0.215347	3.88873	4.68374	0.0412385	0.743063
	ENSMUSG00000022240.11	Ctnnd2	0.215309	3.2854	6.55701	0.0175928	0.655321
	ENSMUSG00000019992.9	Mtfr2	0.215237	-0.409793	0.497485	0.487793	0.964453
	ENSMUSG00000057246.17	BC051142	0.21512	1.32561	0.736765	0.399686	0.950294
	ENSMUSG00000022388.15	Ttll8	0.215117	0.889889	2.86379	0.104298	0.824443
	ENSMUSG00000119584.1	Rn18s-rs5	0.215069	10.7346	0.577696	0.455051	0.958077
	ENSMUSG00000037887.12	Dusp8	0.214952	5.25523	7.61494	0.0112493	0.613243
	ENSMUSG00000032311.18	Nrg4	0.214774	1.7239	3.72533	0.0662008	0.793612
	ENSMUSG00000085852.2	Gm13807	0.214456	0.318886	1.61993	0.216004	0.905199
	ENSMUSG00000021950.16	Anxa8	0.214382	5.24436	3.06267	0.0936381	0.81984
	ENSMUSG00000090053.10	ENSMUSG00000090053.10	0.21428	-0.0383882	0.186642	0.669809	0.97542
	ENSMUSG00000109841.4	E330011O21Rik	0.214219	0.0852678	1.05803	0.314517	0.938629
	ENSMUSG00000045467.14	Ttll13	0.214207	1.11692	2.58903	0.121448	0.844055
	ENSMUSG00000076940.4	Iglv2	0.214181	0.897978	0.142347	0.709469	0.980117
	ENSMUSG00000055865.9	Tafa3	0.21403	0.260924	2.11248	0.15981	0.873263
	ENSMUSG00000095762.2	Gm16378	0.213899	0.423004	1.08881	0.307737	0.938487
	ENSMUSG00000086368.4	Gm13830	0.21389	-0.424744	2.03249	0.228357	0.906553
	ENSMUSG00000120369.1	ENSMUSG00000120369.1	0.213812	3.4511	7.71386	0.0108002	0.599978
	ENSMUSG00000036466.18	Megf11	0.213806	0.161222	2.64066	0.117987	0.842155
	ENSMUSG00000029135.11	Fosl2	0.213185	6.40544	13.6588	0.00121591	0.400582
	ENSMUSG00000086235.2	Gm16284	0.213132	0.176293	0.844373	0.367826	0.944739
	ENSMUSG00000044628.6	Rnf208	0.213093	1.84065	2.87467	0.10368	0.824443
	ENSMUSG00000049866.13	Arl4c	0.213087	6.0734	13.5443	0.00126293	0.400582
	ENSMUSG00000097209.3	AU022754	0.212698	0.417307	1.17264	0.290246	0.931045
	ENSMUSG00000081695.2	Rpsa-ps5	0.212447	1.19783	0.252469	0.620189	0.974805
	ENSMUSG00000039372.6	Marchf4	0.212315	3.37137	2.41342	0.134153	0.861215
	ENSMUSG00000097789.3	Ctxnd1	0.212252	2.50397	2.82357	0.106622	0.824443
	ENSMUSG00000102460.2	Gm38197	0.212117	0.614526	1.53437	0.228134	0.906553
	ENSMUSG00000085334.8	Gm12940	0.211792	2.88123	1.58314	0.221118	0.905199
	ENSMUSG00000025069.16	Gsto2	0.211552	0.374496	1.89109	0.182521	0.886711
	ENSMUSG00000074232.4	Gm10647	0.211275	-0.2381	0.812608	0.37683	0.946475
	ENSMUSG00000036231.6	Agr3	0.210868	2.36208	2.64517	0.11769	0.841331
	ENSMUSG00000086894.3	Gm15708	0.210842	1.23927	2.66686	0.116274	0.839945
	ENSMUSG00000026809.16	Spaca9	0.210837	2.69995	2.74199	0.111524	0.829395
	ENSMUSG00000117992.2	Gm41760	0.210806	0.537608	2.48354	0.1289	0.852541
	ENSMUSG00000029431.6	B3gnt4	0.210736	1.8841	2.30525	0.142765	0.866356
	ENSMUSG00000031762.8	Mt2	0.210502	2.7832	0.480401	0.495283	0.964784
	ENSMUSG00000097296.2	Gm26532	0.210456	4.13692	3.21959	0.0861133	0.811159
	ENSMUSG00000053613.7	Notumos	0.21037	0.261871	1.22817	0.279385	0.922466
	ENSMUSG00000085873.3	Ttc39aos1	0.210125	1.96925	2.97611	0.0981142	0.821595
	ENSMUSG00000049281.17	Scn3b	0.209717	6.18198	2.17924	0.153643	0.873263
	ENSMUSG00000067219.10	Nipal1	0.209459	2.81228	3.33526	0.0810124	0.806508
	ENSMUSG00000111970.3	Gm47715	0.209377	1.2761	2.2391	0.148355	0.870288
	ENSMUSG00000037725.9	Ckap2	0.20929	1.31434	0.379953	0.543771	0.967409
	ENSMUSG00000063529.4	Stmnd1	0.20896	3.66125	2.37632	0.137035	0.865127
	ENSMUSG00000007476.19	Lrrc8a	0.20861	6.10765	12.871	0.00158328	0.403176
	ENSMUSG00000038860.16	Garnl3	0.208541	4.26383	6.54436	0.0176895	0.655321
	ENSMUSG00000019945.11	Cabcoco1	0.208295	2.34701	1.98384	0.172557	0.87909
	ENSMUSG00000004360.10	9330159F19Rik	0.208271	1.95628	2.25255	0.147198	0.868449
	ENSMUSG00000071723.8	Gspt2	0.207896	2.00272	4.96839	0.0360251	0.728659
	ENSMUSG00000029369.18	Afm	0.207881	-0.324087	0.439547	0.514028	0.964784
	ENSMUSG00000083907.3	Plk-ps1	0.207682	-0.455758	0.885639	0.356585	0.944739
	ENSMUSG00000045248.7	Med26	0.20766	3.83838	8.51358	0.00781824	0.587968
	ENSMUSG00000030125.12	Lrrc23	0.207607	5.321	3.77625	0.0645063	0.788816
	ENSMUSG00000078925.12	D030018L15Rik	0.207435	0.833978	0.970781	0.334887	0.942266
	ENSMUSG00000108950.2	9130015G15Rik	0.207307	2.98916	3.40995	0.0779035	0.802467
	ENSMUSG00000027350.9	Chgb	0.207139	-0.361722	1.0756	0.310623	0.938487
	ENSMUSG00000120991.1	ENSMUSG00000120991.1	0.207048	-0.205064	1.16713	0.291355	0.931045
	ENSMUSG00000091989.2	Ndufab1-ps	0.206742	1.56599	2.6796	0.115453	0.838346
	ENSMUSG00000087057.8	Gm11730	0.206726	-0.0148123	0.592343	0.449462	0.958077
	ENSMUSG00000068587.11	Mgam	0.206698	-0.150851	0.676108	0.419497	0.954851
	ENSMUSG00000079852.5	Klra4	0.206676	0.634796	0.582316	0.453276	0.958077
	ENSMUSG00000079414.5	Gm11110	0.206393	0.0471034	1.51271	0.231341	0.906553
	ENSMUSG00000095130.2	Ighv1-39	0.20631	-0.0777595	0.0754559	0.786041	0.98709
	ENSMUSG00000096256.3	4933409K07Rik	0.205693	-0.302143	0.236144	0.63167	0.97542
	ENSMUSG00000087484.2	2900089D17Rik	0.205655	2.63179	2.51944	0.126304	0.849473
	ENSMUSG00000035456.10	Prdm8	0.205387	1.62919	0.432018	0.51762	0.964784
	ENSMUSG00000033594.12	Spata2l	0.205031	2.76082	6.18498	0.0206996	0.661062
	ENSMUSG00000102912.2	Gm20731	0.204889	-0.219286	0.791352	0.383037	0.947203
	ENSMUSG00000015605.7	Srf	0.204756	5.62482	9.18514	0.0060087	0.559289
	ENSMUSG00000026961.7	Lrrc26	0.204708	3.37138	2.70734	0.113686	0.83588
	ENSMUSG00000028214.14	Gem	0.204317	4.37012	5.67697	0.0259748	0.681691
	ENSMUSG00000102112.3	1810041H14Rik	0.204293	-0.168711	1.0252	0.321977	0.938637
	ENSMUSG00000055254.16	Ntrk2	0.204173	4.54703	0.513008	0.481155	0.964453
	ENSMUSG00000030544.6	Mesp1	0.204102	1.88165	4.01829	0.0570992	0.77337
	ENSMUSG00000000320.11	Alox12	0.204032	3.34651	1.07264	0.311274	0.938487
	ENSMUSG00000097746.3	Gm6225	0.203963	0.214063	0.982769	0.331983	0.941249
	ENSMUSG00000045555.4	Mettl24	0.203956	3.27066	7.26675	0.0130022	0.629245
	ENSMUSG00000028730.15	Cfap57	0.203808	3.82101	2.31318	0.142111	0.866356
	ENSMUSG00000085311.2	Gm15445	0.203569	0.0901802	1.01465	0.324426	0.939376
	ENSMUSG00000073805.6	Insyn2a	0.20309	0.711135	0.458561	0.505151	0.964784
	ENSMUSG00000089997.3	1810020O05Rik	0.202943	2.42284	3.56763	0.0717799	0.800275
	ENSMUSG00000107336.2	Gm43461	0.202777	0.745232	1.64503	0.2126	0.905199
	ENSMUSG00000091613.2	Gm17046	0.20267	0.724565	2.56372	0.123188	0.845869
	ENSMUSG00000106416.2	Gm5857	0.202644	0.325843	1.28182	0.269398	0.91941
	ENSMUSG00000032066.10	Bco2	0.202559	0.957824	1.6232	0.215555	0.905199
	ENSMUSG00000107451.2	Gm44421	0.202449	0.268947	1.19345	0.286111	0.927901
	ENSMUSG00000039217.14	Il18	0.202012	3.13724	3.3632	0.0798334	0.804944
	ENSMUSG00000120262.1	ENSMUSG00000120262.1	0.201995	0.292848	1.13871	0.29716	0.933945
	ENSMUSG00000085442.2	Gm3362	0.201817	1.83399	1.13569	0.297787	0.933945
	ENSMUSG00000056687.11	Gm11696	0.201715	2.65234	5.999	0.022478	0.666643
	ENSMUSG00000035984.15	Nme5	0.201374	3.97459	2.73083	0.112215	0.830719
	ENSMUSG00000118671.1	Eppk1	0.20129	2.32263	2.50133	0.127606	0.850659
	ENSMUSG00000097145.7	9230114K14Rik	0.201233	-0.252488	1.278	0.270093	0.91959
	ENSMUSG00000010080.16	Epn3	0.20111	6.2555	7.75019	0.0106403	0.599978
	ENSMUSG00000074923.11	Pak6	0.200948	2.47158	1.64135	0.213094	0.905199
	ENSMUSG00000030043.12	Tacr1	0.200921	0.0830045	0.38413	0.541583	0.967409
	ENSMUSG00000104445.2	Rhbg	0.20068	2.3898	4.22462	0.0515417	0.763472
	ENSMUSG00000042812.6	Foxf1	0.200566	7.92341	6.45214	0.0184126	0.657554
	ENSMUSG00000033486.15	Catsper2	0.20036	1.32207	2.98043	0.0978847	0.821595
	ENSMUSG00000022591.6	Gm9747	0.200329	4.17094	4.50323	0.0449831	0.751839
	ENSMUSG00000038112.16	AW551984	0.200295	0.41063	0.885733	0.35656	0.944739
	ENSMUSG00000032017.15	Grik4	0.200026	0.138529	0.797783	0.381143	0.946475
	ENSMUSG00000039676.5	Capsl	0.199712	3.73085	2.74996	0.111034	0.828214
	ENSMUSG00000041695.3	Kcnj2	0.199526	4.67041	1.82555	0.189989	0.894277
	ENSMUSG00000103436.2	Gm36995	0.199184	2.45089	2.82068	0.106791	0.824443
	ENSMUSG00000029186.13	Pi4k2b	0.199135	6.59926	9.29289	0.00576392	0.548168
	ENSMUSG00000023235.15	Ccl25	0.199083	2.00402	3.13324	0.0901635	0.813301
	ENSMUSG00000030087.12	Klf15	0.199044	5.24507	3.4124	0.0778042	0.802467
	ENSMUSG00000043687.17	1190005I06Rik	0.199016	-0.473506	0.945293	0.341183	0.943144
	ENSMUSG00000028862.7	Map3k6	0.198952	4.66059	2.34967	0.13915	0.865479
	ENSMUSG00000030708.15	Dnajb13	0.198792	3.56536	3.6289	0.0695508	0.796512
	ENSMUSG00000066807.3	Gm10179	0.198667	2.07788	2.65925	0.116769	0.839945
	ENSMUSG00000024459.19	H2-M5	0.198359	1.21828	2.8821	0.10326	0.824443
	ENSMUSG00000106783.3	Chaer1	0.198231	2.20959	2.00614	0.170261	0.878304
	ENSMUSG00000001864.14	Aif1l	0.198221	2.54644	2.34104	0.139844	0.865629
	ENSMUSG00000038077.8	Kcna6	0.198194	0.0172003	0.307887	0.584415	0.972677
	ENSMUSG00000098104.2	Gm6085	0.198009	1.70669	2.02852	0.167994	0.875962
	ENSMUSG00000078184.2	Rbm8a2	0.197951	1.65867	2.21327	0.15061	0.870726
	ENSMUSG00000105408.2	Gm7285	0.197851	1.00554	1.66207	0.210327	0.905199
	ENSMUSG00000069814.7	Ccdc92b	0.197783	1.08553	2.50007	0.127697	0.850659
	ENSMUSG00000059659.9	Gm10069	0.197636	0.746022	2.69679	0.114354	0.836556
	ENSMUSG00000026175.13	Vil1	0.197572	0.411951	1.23203	0.278651	0.922466
	ENSMUSG00000090642.3	Gm17182	0.197549	1.10559	1.40131	0.248772	0.911106
	ENSMUSG00000121179.1	ENSMUSG00000121179.1	0.19732	3.56032	2.89373	0.102606	0.824443
	ENSMUSG00000020020.9	Usp44	0.197301	0.775392	2.47641	0.129423	0.852883
	ENSMUSG00000023047.12	Amhr2	0.197193	1.79699	3.16712	0.0885488	0.811159
	ENSMUSG00000106803.2	Gm8930	0.197176	-0.200867	0.761777	0.391926	0.948915
	ENSMUSG00000081152.2	Gm12430	0.197096	1.07727	1.9429	0.176871	0.881866
	ENSMUSG00000026579.9	F5	0.197065	2.38322	0.776273	0.387531	0.948261
	ENSMUSG00000118243.2	Gm50203	0.196747	-0.25692	0.980769	0.332465	0.941249
	ENSMUSG00000033036.10	Gm7879	0.19657	-0.0933031	0.572614	0.457017	0.958736
	ENSMUSG00000021213.13	Akr1c13	0.19625	2.38145	4.4587	0.0459651	0.751839
	ENSMUSG00000000562.6	Adora3	0.195957	0.431404	1.23361	0.27835	0.922466
	ENSMUSG00000048327.7	Ckap2l	0.195763	2.21427	0.603476	0.445287	0.958077
	ENSMUSG00000012123.18	Crybg2	0.195702	3.66256	2.2144	0.15051	0.870726
	ENSMUSG00000042622.15	Maff	0.195518	4.13238	5.00373	0.0354312	0.72769
	ENSMUSG00000116090.2	Rpl19-ps6	0.19535	0.91055	1.14218	0.296442	0.933945
	ENSMUSG00000031220.15	Awat2	0.195198	-0.431056	0.880535	0.357948	0.944739
	ENSMUSG00000079444.10	Gm21981	0.194921	0.360193	0.633003	0.43451	0.955485
	ENSMUSG00000055612.16	Cdca7	0.194886	2.84743	3.26452	0.0840893	0.808692
	ENSMUSG00000017007.10	Rbpjl	0.19479	6.53766	6.16771	0.0208579	0.661062
	ENSMUSG00000027115.15	Kif18a	0.194591	1.1971	1.50568	0.232393	0.907179
	ENSMUSG00000121114.1	ENSMUSG00000121114.1	0.194212	0.550773	1.36466	0.254874	0.914506
	ENSMUSG00000112278.3	Gm30025	0.194019	0.92012	1.54423	0.226693	0.905199
	ENSMUSG00000062554.8	Gm12751	0.193976	2.62883	1.66524	0.209907	0.905199
	ENSMUSG00000090061.10	Nwd2	0.193867	0.493119	0.571319	0.45752	0.958738
	ENSMUSG00000032908.10	Sgpp2	0.193813	5.63499	9.69344	0.00494572	0.539328
	ENSMUSG00000107201.2	5930420M18Rik	0.193655	0.182768	0.854175	0.36511	0.944739
	ENSMUSG00000020381.11	Mrnip	0.193487	0.715809	1.56731	0.223364	0.905199
	ENSMUSG00000080966.2	Gm6263	0.193242	1.21429	1.58149	0.22135	0.905199
	ENSMUSG00000037411.11	Serpine1	0.192885	5.30447	0.449673	0.509266	0.964784
	ENSMUSG00000056553.15	Ptprn2	0.192811	1.25514	1.37595	0.252974	0.914461
	ENSMUSG00000120984.1	ENSMUSG00000120984.1	0.192769	3.26055	4.40677	0.0471406	0.751839
	ENSMUSG00000118107.2	Gm34455	0.192729	0.181721	1.29778	0.266516	0.918375
	ENSMUSG00000030142.11	Clec4e	0.192684	2.0091	0.288467	0.596439	0.972677
	ENSMUSG00000095105.3	Edaradd	0.192636	1.43781	1.63868	0.213454	0.905199
	ENSMUSG00000070473.5	Cldn3	0.192573	6.57386	8.91454	0.00667543	0.575106
	ENSMUSG00000014846.13	Tppp3	0.192278	8.53387	5.49709	0.0281898	0.699241
	ENSMUSG00000114023.2	Gm6474	0.192081	-0.437061	0.732003	0.401189	0.950294
	ENSMUSG00000021791.8	Dydc2	0.192037	0.138574	1.01128	0.325213	0.940355
	ENSMUSG00000086769.8	Gm15587	0.19193	1.44018	2.13395	0.157794	0.873263
	ENSMUSG00000004929.13	Thop1	0.19185	4.23471	2.59817	0.120826	0.844055
	ENSMUSG00000106641.2	Gm43534	0.191744	0.183303	0.749707	0.395642	0.950294
	ENSMUSG00000083019.3	Gm6222	0.191175	-0.2038	0.569488	0.458232	0.958817
	ENSMUSG00000086810.2	Gm13110	0.191029	-0.346483	0.425361	0.520834	0.964861
	ENSMUSG00000066279.4	Chrna10	0.190738	-0.299437	0.617954	0.439951	0.958077
	ENSMUSG00000117921.2	Gm50186	0.190305	1.13734	0.55834	0.462612	0.960351
	ENSMUSG00000030048.6	Gkn3	0.189715	0.684618	0.960269	0.337464	0.943144
	ENSMUSG00000103662.2	Gm34294	0.189574	0.522032	1.24309	0.276559	0.922466
	ENSMUSG00000040471.18	Ggt6	0.18948	1.40591	0.770003	0.389423	0.948569
	ENSMUSG00000054517.10	Trim65	0.189328	4.80246	9.49822	0.0053273	0.541937
	ENSMUSG00000050854.10	Tmem125	0.189015	3.3959	3.71674	0.0664915	0.793612
	ENSMUSG00000074576.5	Mocs3	0.188937	2.69187	6.2253	0.020335	0.659775
	ENSMUSG00000021750.17	Fam107a	0.188837	3.63762	2.11784	0.159304	0.873263
	ENSMUSG00000029522.13	Pla2g1b	0.188642	3.32686	3.47449	0.0753273	0.802467
	ENSMUSG00000043644.6	0610009L18Rik	0.188553	1.93313	1.84667	0.187541	0.893085
	ENSMUSG00000036306.14	Lzts1	0.188404	3.18662	6.5411	0.0177146	0.655321
	ENSMUSG00000031070.16	Mrgprf	0.188276	2.08836	2.21904	0.150103	0.870726
	ENSMUSG00000050747.15	Trim15	0.188195	0.217424	1.97923	0.173037	0.879573
	ENSMUSG00000105340.6	Gm42878	0.188149	2.25101	2.09181	0.161779	0.873352
	ENSMUSG00000109179.3	Gm35339	0.188077	2.53559	2.56356	0.1232	0.845869
	ENSMUSG00000073413.10	Ly6g6d	0.187955	1.87222	2.67817	0.115544	0.838346
	ENSMUSG00000049436.6	Upk1b	0.187904	5.68739	3.81948	0.0631067	0.785502
	ENSMUSG00000068246.7	Apol9b	0.18787	2.84109	1.07712	0.310289	0.938487
	ENSMUSG00000098773.2	Gm27179	0.18787	-0.472629	0.256354	0.617526	0.974805
	ENSMUSG00000046242.9	Nme9	0.187661	4.25129	2.25104	0.147328	0.868627
	ENSMUSG00000052675.12	Zfp112	0.187573	2.21699	3.76632	0.064833	0.790952
	ENSMUSG00000031609.4	Sap30	0.187566	2.34476	3.46656	0.0756387	0.802467
	ENSMUSG00000090509.3	Sfta2	0.187259	5.02116	3.08546	0.0924993	0.816813
	ENSMUSG00000029206.14	Nsun7	0.187028	2.996	6.01102	0.0223581	0.666643
	ENSMUSG00000027713.7	1810062G17Rik	0.187009	0.694764	1.27152	0.271277	0.920364
	ENSMUSG00000028457.19	Atp8b5	0.186926	-0.237595	0.844776	0.367713	0.944739
	ENSMUSG00000040084.10	Bub1b	0.186868	3.12234	1.89226	0.182391	0.886711
	ENSMUSG00000034209.5	Rasl10a	0.18681	0.650182	1.3181	0.262907	0.915363
	ENSMUSG00000103469.2	Gm9910	0.186773	3.12893	3.40139	0.078253	0.802467
	ENSMUSG00000022096.15	Hr	0.186763	4.42974	3.78403	0.064252	0.788401
	ENSMUSG00000044026.4	Slc35g1	0.186512	2.39587	4.07285	0.0555662	0.77337
	ENSMUSG00000087252.2	Gm14379	0.186508	-0.370474	0.67089	0.421271	0.955112
	ENSMUSG00000050445.5	Cyp8b1	0.186502	1.13874	1.42453	0.245003	0.907517
	ENSMUSG00000053964.18	Lgals4	0.186468	3.77946	2.86094	0.104461	0.824443
	ENSMUSG00000080059.5	Rps19-ps3	0.186207	-0.0167013	0.599552	0.446752	0.958077
	ENSMUSG00000037801.14	Iqch	0.18618	-0.220585	0.666839	0.422656	0.955112
	ENSMUSG00000117037.2	Gm50433	0.185904	-0.177555	0.701289	0.411095	0.953825
	ENSMUSG00000110569.2	Gm18860	0.185798	0.0321444	0.919874	0.347629	0.944589
	ENSMUSG00000085169.3	Gm10785	0.185699	-0.364985	0.899985	0.352792	0.944722
	ENSMUSG00000070392.6	Gm20634	0.185617	3.33477	1.42997	0.244131	0.907517
	ENSMUSG00000044433.17	Camsap3	0.18549	5.0487	7.06449	0.014158	0.634343
	ENSMUSG00000034334.9	Fam151b	0.185425	2.28292	7.32367	0.012696	0.629245
	ENSMUSG00000116506.2	5730414N17Rik	0.185339	0.230425	0.881646	0.357651	0.944739
	ENSMUSG00000110020.2	Gm45441	0.185267	-0.404456	0.616235	0.440579	0.958077
	ENSMUSG00000057897.15	Camk2b	0.185174	3.34138	0.581641	0.453535	0.958077
	ENSMUSG00000090704.3	Trp53-ps	0.185044	-0.116916	0.834951	0.370464	0.945097
	ENSMUSG00000090336.6	Cfap97d2	0.184647	1.55762	1.02625	0.321733	0.938637
	ENSMUSG00000109754.3	Gm39214	0.184609	0.409384	0.959361	0.337688	0.943144
	ENSMUSG00000032890.18	Rims3	0.184531	2.23738	4.76198	0.0397256	0.737654
	ENSMUSG00000044916.11	1700029I15Rik	0.184374	0.808413	1.54981	0.225882	0.905199
	ENSMUSG00000079334.9	Naa80	0.184249	5.49538	8.20813	0.00883381	0.597116
	ENSMUSG00000038943.17	Prc1	0.184031	3.04045	0.739574	0.398803	0.950294
	ENSMUSG00000079652.9	Garin1a	0.184024	1.93899	1.87032	0.184848	0.888526
	ENSMUSG00000026601.16	Axdnd1	0.183428	0.318691	0.794706	0.382047	0.946475
	ENSMUSG00000116912.2	Gm5487	0.183081	1.52826	2.34224	0.139748	0.865479
	ENSMUSG00000087461.3	C230014O12Rik	0.183008	-0.0010405	0.780024	0.386406	0.94824
	ENSMUSG00000032602.7	Slc25a20	0.182999	5.06505	6.57472	0.0174584	0.655321
	ENSMUSG00000115186.2	Gm49417	0.182797	2.71079	3.04893	0.0943324	0.820335
	ENSMUSG00000041423.17	Paqr6	0.182782	2.61366	3.71855	0.0664301	0.793612
	ENSMUSG00000020140.16	Lgr5	0.182703	-0.319984	0.688048	0.41548	0.954406
	ENSMUSG00000027068.7	Dhrs9	0.182661	0.496699	0.263579	0.61264	0.974805
	ENSMUSG00000107121.3	1110006O24Rik	0.182626	-0.16559	1.05272	0.315707	0.938637
	ENSMUSG00000117465.2	Gm49980	0.182535	2.04393	0.242127	0.627406	0.97542
	ENSMUSG00000087165.9	2010001A14Rik	0.182283	1.35269	2.28031	0.144842	0.866356
	ENSMUSG00000036641.10	Ccdc148	0.182283	0.955832	1.52	0.230255	0.906553
	ENSMUSG00000070997.5	1700055D18Rik	0.182266	-0.391219	1.11036	0.303108	0.937074
	ENSMUSG00000042854.10	Trp53rkb	0.182078	1.52611	3.26513	0.0840622	0.808692
	ENSMUSG00000041351.17	Rap1gap	0.181995	5.47275	10.6836	0.0034206	0.520496
	ENSMUSG00000021701.9	Plk2	0.181814	6.68708	4.26076	0.0506327	0.759881
	ENSMUSG00000051678.5	Pcdhb6	0.181764	-0.169267	0.55581	0.463616	0.960351
	ENSMUSG00000091228.2	Gm20390	0.181661	4.44117	3.70228	0.0669846	0.793612
	ENSMUSG00000107053.3	1700021F13Rik	0.181615	0.123858	1.11834	0.301418	0.93603
	ENSMUSG00000075266.6	Cenpw	0.181562	-0.306046	0.780987	0.386118	0.948173
	ENSMUSG00000027857.11	Tshb	0.181508	0.171816	2.76749	0.145749	0.866559
	ENSMUSG00000042808.11	Gpx2	0.181477	4.58236	0.502603	0.485588	0.964453
	ENSMUSG00000032092.6	Mpzl2	0.181255	2.79885	1.30356	0.265483	0.918172
	ENSMUSG00000085514.2	Bcas3os2	0.181198	0.023593	0.718949	0.405355	0.951598
	ENSMUSG00000086279.3	Gm15634	0.181177	-0.236746	0.80144	0.380072	0.946475
	ENSMUSG00000060180.13	Myh13	0.181132	0.24448	0.554561	0.464112	0.960351
	ENSMUSG00000044005.14	Gls2	0.180941	0.163233	1.42756	0.244517	0.907517
	ENSMUSG00000052912.8	Smarca5-ps	0.180893	1.58897	2.08125	0.162796	0.873901
	ENSMUSG00000034664.14	Itga2b	0.180147	3.62989	0.926116	0.34603	0.944294
	ENSMUSG00000100075.2	1700018L02Rik	0.180023	1.57387	2.57201	0.122615	0.845073
	ENSMUSG00000053783.6	1700016K19Rik	0.18002	3.84229	3.15219	0.0892561	0.811485
	ENSMUSG00000027315.14	Spint1	0.180003	5.79406	19.394	0.000211864	0.223545
	ENSMUSG00000024883.9	Rin1	0.179929	3.27185	5.76567	0.0249546	0.681691
	ENSMUSG00000085962.9	Gm16984	0.179922	0.585368	0.635511	0.433614	0.955485
	ENSMUSG00000026840.15	Lamc3	0.179895	4.53261	2.371	0.137454	0.865127
	ENSMUSG00000085957.5	Syna	0.179843	0.753467	1.74207	0.200053	0.900626
	ENSMUSG00000083829.2	Gm2199	0.179722	1.31223	3.18403	0.0877552	0.811159
	ENSMUSG00000025500.13	Lmntd2	0.179704	1.87926	3.09021	0.092264	0.816813
	ENSMUSG00000071076.9	Jund	0.179496	7.63499	2.70103	0.114085	0.836556
	ENSMUSG00000055763.10	Rybp-ps	0.179469	0.761917	2.48997	0.129537	0.852883
	ENSMUSG00000041220.11	Elovl6	0.179421	4.42878	0.150961	0.701245	0.979613
	ENSMUSG00000110496.2	Gm45909	0.179215	-0.0657958	0.550055	0.465911	0.960351
	ENSMUSG00000110266.2	Gm32742	0.178774	1.21938	1.0468	0.317043	0.938637
	ENSMUSG00000067786.17	Nnat	0.178696	4.06552	0.686942	0.41585	0.954406
	ENSMUSG00000072473.5	1700024G13Rik	0.178475	3.32685	1.88532	0.183164	0.887125
	ENSMUSG00000084925.9	1810062O18Rik	0.178451	-0.166673	1.45645	0.239941	0.907312
	ENSMUSG00000070306.4	Ccdc153	0.178402	6.07331	2.37842	0.136869	0.865127
	ENSMUSG00000097750.3	Gm4673	0.178167	3.42244	6.61738	0.0171394	0.653913
	ENSMUSG00000049721.15	Gal3st1	0.17813	3.15716	3.11415	0.0910888	0.815792
	ENSMUSG00000120414.1	Gm32261	0.177957	-0.434377	0.549557	0.466111	0.960351
	ENSMUSG00000028893.9	Sesn2	0.177925	4.36482	11.7663	0.00231952	0.446972
	ENSMUSG00000070972.14	Dnajc25	0.177914	3.7326	11.9565	0.00216972	0.43597
	ENSMUSG00000113918.2	Gm6566	0.177713	0.0926718	0.878478	0.3585	0.944739
	ENSMUSG00000086316.9	Nbdy	0.17766	4.10335	9.02089	0.00640412	0.568861
	ENSMUSG00000006529.17	Itih1	0.177645	1.28368	2.10245	0.160762	0.873263
	ENSMUSG00000047854.6	Stx19	0.177639	3.03841	4.43004	0.0466098	0.751839
	ENSMUSG00000054499.10	Dedd2	0.177511	5.12596	11.3285	0.00270923	0.488393
	ENSMUSG00000031027.16	Stk33	0.177447	3.76203	1.35705	0.256164	0.914506
	ENSMUSG00000113852.2	Gm48062	0.17735	0.851194	1.60506	0.218052	0.905199
	ENSMUSG00000008384.9	Sertad1	0.177257	4.63044	6.08749	0.0216115	0.664395
	ENSMUSG00000055945.9	Prr18	0.177246	4.26896	4.95916	0.036182	0.728659
	ENSMUSG00000097891.2	Gm3650	0.177173	1.596	1.18704	0.287376	0.928069
	ENSMUSG00000105419.2	Gm43205	0.177128	0.551192	1.66792	0.209553	0.905199
	ENSMUSG00000006445.4	Epha2	0.176974	6.40782	8.47545	0.00793766	0.589717
	ENSMUSG00000040055.10	Gjb6	0.176973	3.32477	3.94011	0.0593805	0.77752
	ENSMUSG00000108378.2	Gm44641	0.176816	-0.0974226	0.937994	0.343017	0.943144
	ENSMUSG00000006411.13	Nectin4	0.176655	4.55837	3.75017	0.0653681	0.79143
	ENSMUSG00000001948.11	Spa17	0.176651	3.29011	2.04516	0.166332	0.874435
	ENSMUSG00000116220.2	A430088P11Rik	0.176528	-0.19293	0.444946	0.511479	0.964784
	ENSMUSG00000035274.14	Tpbg	0.176514	1.33581	2.60353	0.120464	0.844055
	ENSMUSG00000081476.2	Itpa-ps1	0.176479	1.78531	1.99163	0.171752	0.879052
	ENSMUSG00000090389.3	Cdv3-ps	0.176403	1.63147	3.20071	0.0869807	0.811159
	ENSMUSG00000001865.3	Cpa3	0.176347	-0.277455	0.21436	0.647786	0.97542
	ENSMUSG00000081888.2	Spcs2-ps	0.176289	0.723833	1.57218	0.22267	0.905199
	ENSMUSG00000102705.3	4632432E15Rik	0.176006	0.795908	1.42073	0.245614	0.907517
	ENSMUSG00000044646.16	Zbtb7c	0.175916	2.62359	1.23917	0.277298	0.922466
	ENSMUSG00000006784.15	Odad4	0.175637	4.04123	2.3128	0.142142	0.866356
	ENSMUSG00000011171.12	Vipr2	0.175564	5.32964	4.04915	0.0562263	0.77337
	ENSMUSG00000014813.10	Stc1	0.17555	2.70943	1.73775	0.200592	0.901725
	ENSMUSG00000037005.17	Xpnpep2	0.17553	4.28761	3.42479	0.0773025	0.802467
	ENSMUSG00000050428.8	Fbxo46	0.175522	4.08895	6.79381	0.0158869	0.65138
	ENSMUSG00000101210.2	Gm28720	0.175245	0.918361	1.738	0.200561	0.901725
	ENSMUSG00000018012.12	Rac3	0.17515	4.18447	9.4236	0.00548162	0.541937
	ENSMUSG00000114452.2	A530001N23Rik	0.175087	0.00854373	0.565494	0.459794	0.959089
	ENSMUSG00000091952.4	Gm17709	0.17505	1.32078	1.59772	0.219072	0.905199
	ENSMUSG00000010021.14	Kif19a	0.174909	3.98482	1.75698	0.198208	0.8982
	ENSMUSG00000087408.11	Cers1	0.174893	0.97384	1.31716	0.263073	0.915438
	ENSMUSG00000028637.17	Ccdc30	0.174753	3.78698	1.69187	0.206424	0.905199
	ENSMUSG00000028678.14	Kif2c	0.174751	0.8066	0.389416	0.538837	0.967409
	ENSMUSG00000024561.12	Mbd1	0.174698	6.55905	6.46039	0.0183466	0.657554
	ENSMUSG00000032648.15	Pygm	0.174526	5.54067	0.622731	0.438212	0.957207
	ENSMUSG00000048450.11	Msx1	0.174402	1.98643	1.14181	0.296518	0.933945
	ENSMUSG00000082120.2	Gm15720	0.174232	1.35924	1.15751	0.293302	0.932199
	ENSMUSG00000118053.2	Gm50244	0.174106	0.587586	1.61692	0.216416	0.905199
	ENSMUSG00000028845.16	Tekt2	0.174059	3.72414	3.92507	0.0598311	0.778431
	ENSMUSG00000040502.6	Marchf9	0.174049	3.08868	6.35467	0.0192127	0.659775
	ENSMUSG00000050675.8	Gp1ba	0.17395	1.78637	0.61445	0.441233	0.958077
	ENSMUSG00000025196.5	Cpn1	0.173713	2.56496	2.20833	0.151046	0.871158
	ENSMUSG00000034795.15	Ccdc122	0.173706	1.68024	1.12423	0.300179	0.935339
	ENSMUSG00000072437.5	Nanos1	0.173394	1.30069	0.842258	0.368415	0.944739
	ENSMUSG00000073448.4	ENSMUSG00000073448.4	0.173287	0.360365	0.724799	0.40348	0.950351
	ENSMUSG00000110834.3	Gm39469	0.173233	0.160896	1.11647	0.301813	0.936208
	ENSMUSG00000037202.7	Prf1	0.173093	3.16945	1.95966	0.17509	0.880609
	ENSMUSG00000048330.15	Ric3	0.172779	3.11374	1.81129	0.191662	0.895168
	ENSMUSG00000051590.11	Map3k19	0.17272	3.04747	2.25571	0.146928	0.868055
	ENSMUSG00000044330.9	Gm9790	0.1727	1.10603	0.915524	0.348749	0.944722
	ENSMUSG00000053746.9	Ptrh1	0.172661	1.39032	1.23054	0.278933	0.922466
	ENSMUSG00000053161.17	Daw1	0.172648	2.16521	1.46786	0.238165	0.907266
	ENSMUSG00000039977.17	Deup1	0.17233	2.13959	0.716605	0.40611	0.951598
	ENSMUSG00000066178.5	6030445D17Rik	0.172328	0.306512	1.54537	0.226527	0.905199
	ENSMUSG00000091971.4	Hspa1a	0.172129	6.09903	0.050776	0.823738	0.989375
	ENSMUSG00000030499.10	Kctd15	0.172044	4.03794	4.68193	0.0412742	0.743063
	ENSMUSG00000023052.9	Npff	0.172015	2.626	4.57241	0.0435045	0.751839
	ENSMUSG00000007659.19	Bcl2l1	0.171991	6.8611	9.81578	0.00472197	0.539328
	ENSMUSG00000116604.2	Gm49745	0.171966	1.0078	1.08378	0.308832	0.938487
	ENSMUSG00000085772.9	D630024D03Rik	0.171673	2.02641	1.91722	0.179644	0.884272
	ENSMUSG00000075408.6	Smim41	0.171655	3.49302	1.64019	0.213251	0.905199
	ENSMUSG00000009097.11	Tbx1	0.171087	3.70819	1.86981	0.184905	0.888526
	ENSMUSG00000032459.10	Mrps22	0.170933	2.8671	5.57588	0.0271946	0.6937
	ENSMUSG00000003752.10	Itpkc	0.170894	3.94009	4.39371	0.0474417	0.751839
	ENSMUSG00000050240.17	Hic2	0.170735	2.84448	3.76268	0.0649532	0.790952
	ENSMUSG00000114293.2	Gm48078	0.170638	-0.245112	0.440301	0.513671	0.964784
	ENSMUSG00000029811.15	Aoc1	0.170612	2.97873	0.641183	0.431597	0.955477
	ENSMUSG00000078486.4	Perm1	0.170494	2.95272	0.419264	0.523809	0.966078
	ENSMUSG00000023031.9	Cela1	0.170239	0.151358	0.899565	0.352903	0.944722
	ENSMUSG00000049154.13	Fam183b	0.170186	4.00419	1.61742	0.216347	0.905199
	ENSMUSG00000052861.14	Dnah6	0.170183	5.67393	2.04838	0.166014	0.874231
	ENSMUSG00000002346.17	Slc25a42	0.170033	5.1183	2.92913	0.100647	0.824443
	ENSMUSG00000104654.2	Gm43814	0.170032	0.73684	1.96224	0.174817	0.880609
	ENSMUSG00000115379.2	Gm48990	0.169985	0.00502208	0.591452	0.449799	0.958077
	ENSMUSG00000109241.2	Gm7434	0.169875	0.64073	0.854911	0.364907	0.944739
	ENSMUSG00000101191.7	Gm28809	0.169594	0.210059	0.988577	0.330588	0.941249
	ENSMUSG00000059060.16	Rad51b	0.169381	0.644772	0.835842	0.370213	0.945097
	ENSMUSG00000074345.5	Tnfaip8l3	0.169372	2.47088	3.40726	0.0780131	0.802467
	ENSMUSG00000021223.14	Papln	0.169327	0.471351	0.666321	0.422834	0.955112
	ENSMUSG00000047030.16	Spata2	0.168971	5.02323	25.7282	4.06452e-05	0.0735794
	ENSMUSG00000121084.1	ENSMUSG00000121084.1	0.168904	3.64811	6.22409	0.0203459	0.659775
	ENSMUSG00000097316.3	Gm10516	0.168837	1.9146	1.7948	0.193622	0.895845
	ENSMUSG00000115970.3	8430426J06Rik	0.168675	0.366594	0.619636	0.439337	0.958001
	ENSMUSG00000039568.7	Ubald1	0.168648	5.9738	11.3019	0.00273516	0.488393
	ENSMUSG00000062116.11	Zfp954	0.168481	3.58365	7.28843	0.0128846	0.629245
	ENSMUSG00000070526.3	Peg12	0.168245	0.921672	1.82289	0.190299	0.894531
	ENSMUSG00000038522.8	Mfsd4b1	0.168242	1.69497	1.06516	0.31293	0.938629
	ENSMUSG00000003779.17	Kif20a	0.1682	2.28584	0.371739	0.548123	0.967409
	ENSMUSG00000020648.4	Dus4l	0.168128	2.64258	4.94364	0.0364477	0.729747
	ENSMUSG00000083567.4	Gm11451	0.168126	0.234152	1.00118	0.327589	0.940355
	ENSMUSG00000110647.4	Gm17745	0.168062	-0.0813468	0.945529	0.341124	0.943144
	ENSMUSG00000070803.7	Cited4	0.168001	0.802486	0.66966	0.421691	0.955112
	ENSMUSG00000106678.2	Gm43457	0.167931	0.859651	1.74649	0.199504	0.899775
	ENSMUSG00000029563.17	Foxp2	0.16774	2.9168	1.95532	0.175548	0.880609
	ENSMUSG00000030054.5	Gp9	0.167711	1.10942	0.402407	0.5322	0.966777
	ENSMUSG00000006958.15	Chrd	0.167656	2.12804	2.51733	0.126456	0.849473
	ENSMUSG00000084145.4	Gm12263	0.167424	1.27788	1.81769	0.190909	0.895089
	ENSMUSG00000028108.17	Ecm1	0.167406	6.89395	3.01807	0.0959139	0.820335
	ENSMUSG00000110218.2	Tincr	0.167254	2.65051	2.87485	0.103669	0.824443
	ENSMUSG00000073414.9	Mpig6b	0.167154	1.51751	1.10056	0.305203	0.938003
	ENSMUSG00000046761.14	Fam83h	0.167061	4.62684	8.75554	0.00710495	0.583258
	ENSMUSG00000040289.9	Hey1	0.166997	6.17898	3.68482	0.0675852	0.795553
	ENSMUSG00000071506.5	Tmem139	0.166975	2.40586	2.97678	0.0980785	0.821595
	ENSMUSG00000110120.2	Gm45251	0.166938	1.17282	0.751835	0.394983	0.950294
	ENSMUSG00000050122.20	Vwa3b	0.166923	3.38545	1.1017	0.304956	0.937886
	ENSMUSG00000097383.3	1500026H17Rik	0.166913	0.0733713	0.940533	0.342377	0.943144
	ENSMUSG00000059824.13	Dbp	0.166912	6.43466	0.653179	0.42738	0.955112
	ENSMUSG00000042707.7	Dnali1	0.166879	4.91881	2.47952	0.129195	0.852801
	ENSMUSG00000041660.9	Bbox1	0.166817	1.83402	0.706609	0.409353	0.952957
	ENSMUSG00000118071.2	Gm50455	0.166637	0.0108603	0.944606	0.341355	0.943144
	ENSMUSG00000054057.3	A930004D18Rik	0.166586	2.74429	2.59248	0.121213	0.844055
	ENSMUSG00000075420.7	Smim6	0.166565	4.72113	7.91294	0.00995534	0.599509
	ENSMUSG00000007035.16	Msh5	0.16652	2.0299	2.46187	0.130497	0.854731
	ENSMUSG00000051354.15	Samd3	0.166506	0.616612	1.10167	0.304965	0.937886
	ENSMUSG00000027420.14	Bfsp1	0.166472	1.69436	2.10726	0.160304	0.873263
	ENSMUSG00000080968.4	Atf1-ps	0.166343	1.48082	1.68231	0.207667	0.905199
	ENSMUSG00000035615.13	Frmpd1	0.166217	3.84995	5.28271	0.0311103	0.71631
	ENSMUSG00000121083.1	ENSMUSG00000121083.1	0.166206	3.63205	1.33817	0.259405	0.914506
	ENSMUSG00000024867.15	Pip5k1b	0.165694	4.24057	6.91474	0.0150871	0.64867
	ENSMUSG00000028840.11	Zfp593	0.16566	2.83301	6.53087	0.0177933	0.655321
	ENSMUSG00000049414.8	Gm5417	0.165634	0.564985	0.962379	0.336945	0.943144
	ENSMUSG00000020062.8	Slc5a8	0.16556	0.418557	0.155218	0.69728	0.979613
	ENSMUSG00000091712.3	Sec14l5	0.165511	2.80695	1.53324	0.228299	0.906553
	ENSMUSG00000023966.9	Rsph9	0.165501	3.69471	4.18507	0.0525577	0.771647
	ENSMUSG00000045094.9	Arhgef37	0.165266	2.83626	0.795199	0.381903	0.946475
	ENSMUSG00000110768.2	Gm18541	0.165237	0.65365	1.19165	0.286466	0.927928
	ENSMUSG00000063281.10	Zfp35	0.165218	4.48724	7.23977	0.0131501	0.630447
	ENSMUSG00000121297.1	ENSMUSG00000121297.1	0.165182	0.030781	0.369102	0.549534	0.967409
	ENSMUSG00000112618.2	Gm48835	0.165131	1.06417	1.56044	0.224348	0.905199
	ENSMUSG00000031937.8	Vstm5	0.164915	0.839759	0.612595	0.441914	0.958077
	ENSMUSG00000047509.2	Gm6776	0.164845	0.401181	1.14962	0.294912	0.932876
	ENSMUSG00000021203.16	Otub2	0.164844	3.98707	5.21285	0.032134	0.71631
	ENSMUSG00000010660.4	Plcd1	0.164836	4.2156	2.29795	0.143369	0.866356
	ENSMUSG00000081113.2	Gm7308	0.164713	2.48331	2.55257	0.123964	0.84869
	ENSMUSG00000084799.9	Ino80dos	0.164615	2.35292	2.61763	0.119516	0.844055
	ENSMUSG00000009114.18	2610028H24Rik	0.164512	5.17909	3.65692	0.068558	0.795965
	ENSMUSG00000085945.4	2310014F06Rik	0.164505	1.78834	1.99771	0.171125	0.879052
	ENSMUSG00000073795.12	Spef1l	0.164497	1.94085	1.71253	0.203772	0.905199
	ENSMUSG00000028289.13	Epha7	0.164448	3.12961	3.93179	0.0596291	0.778114
	ENSMUSG00000031445.6	Proz	0.164322	2.45549	1.42085	0.245595	0.907517
	ENSMUSG00000003123.16	Lipe	0.164305	6.34589	1.20188	0.284459	0.926922
	ENSMUSG00000078915.3	Hsp25-ps1	0.164223	3.98408	1.22908	0.279212	0.922466
	ENSMUSG00000091549.2	Gm6548	0.164159	4.11066	8.5907	0.00758266	0.587968
	ENSMUSG00000103144.2	Pcdhga1	0.164095	2.45847	1.42725	0.244567	0.907517
	ENSMUSG00000059049.15	Frem1	0.163964	3.66067	2.41955	0.133684	0.860999
	ENSMUSG00000085830.2	Grin1os	0.163918	0.374126	0.901881	0.352295	0.944722
	ENSMUSG00000050846.10	Zfp623	0.163897	4.17528	9.11418	0.00617613	0.563039
	ENSMUSG00000026765.13	Lypd6b	0.163755	1.99861	0.795301	0.381872	0.946475
	ENSMUSG00000117879.2	2310015A16Rik	0.16365	-0.245846	0.705824	0.409609	0.952957
	ENSMUSG00000039990.17	Edrf1	0.163626	4.45412	7.22012	0.0132591	0.632457
	ENSMUSG00000034997.6	Htr2a	0.163619	0.677328	0.786524	0.384468	0.947274
	ENSMUSG00000035237.8	Lcat	0.163392	1.04834	1.78424	0.194888	0.897118
	ENSMUSG00000027070.15	Lrp2	0.163278	6.16572	4.01169	0.0572879	0.77337
	ENSMUSG00000102269.2	Gm7357	0.163082	1.31128	0.941297	0.342185	0.943144
	ENSMUSG00000085419.3	Gm11734	0.16274	0.29867	0.733359	0.40076	0.950294
	ENSMUSG00000063172.14	Hspb11	0.162704	2.36753	2.98662	0.0975577	0.821595
	ENSMUSG00000020658.11	Efr3b	0.162547	4.1482	4.59232	0.0430892	0.751839
	ENSMUSG00000022580.14	Rhpn1	0.162359	1.33843	1.20166	0.284502	0.926922
	ENSMUSG00000116716.2	Gm49643	0.162292	0.211465	0.463458	0.502908	0.964784
	ENSMUSG00000079297.5	Gm2223	0.162238	4.69417	4.26758	0.0504633	0.759881
	ENSMUSG00000087578.2	Ccdc142os	0.162234	0.717142	0.706102	0.409518	0.952957
	ENSMUSG00000118394.2	Gm50475	0.1622	1.35154	1.23573	0.27795	0.922466
	ENSMUSG00000043336.15	Filip1l	0.16208	6.80483	7.12419	0.0138054	0.632457
	ENSMUSG00000022440.10	C1qtnf6	0.161785	3.81838	1.90938	0.180501	0.885255
	ENSMUSG00000115222.2	Gm49747	0.161537	2.12541	2.00878	0.169992	0.877861
	ENSMUSG00000085282.10	Gm15663	0.161521	2.83871	1.71908	0.202941	0.905199
	ENSMUSG00000096995.4	2810029C07Rik	0.161464	1.56326	1.86993	0.184892	0.888526
	ENSMUSG00000089804.4	Gm16136	0.161398	3.65223	2.59585	0.120984	0.844055
	ENSMUSG00000074221.13	Zfp568	0.161342	4.17599	5.76483	0.024964	0.681691
	ENSMUSG00000014243.6	Zswim7	0.161176	1.42482	1.28427	0.268952	0.919396
	ENSMUSG00000039110.16	Mycbpap	0.160969	4.49503	3.31691	0.081798	0.807978
	ENSMUSG00000021125.7	Arg2	0.160849	2.37585	1.33687	0.259629	0.914506
	ENSMUSG00000108815.2	Gm49388	0.160767	0.558922	0.0145405	0.905083	0.995916
	ENSMUSG00000014773.14	Dll1	0.160764	5.25897	1.51046	0.231676	0.906553
	ENSMUSG00000031853.6	Map3k21	0.160672	2.15103	3.11829	0.0908874	0.815686
	ENSMUSG00000026888.15	Grb14	0.160661	5.91098	8.4562	0.00799874	0.590591
	ENSMUSG00000031022.16	BC051019	0.160516	4.25593	1.70426	0.204829	0.905199
	ENSMUSG00000111681.2	Gm47640	0.160336	2.62556	2.90369	0.102051	0.824443
	ENSMUSG00000022951.18	ENSMUSG00000022951.18	0.160255	5.64504	9.60702	0.00511079	0.539328
	ENSMUSG00000030834.8	Abcc6	0.160152	0.0422065	0.953677	0.339094	0.943144
	ENSMUSG00000020785.18	Camkk1	0.160016	4.28682	5.03416	0.0349286	0.72769
	ENSMUSG00000037379.8	Spon2	0.160005	5.00142	0.73764	0.399411	0.950294
	ENSMUSG00000045752.14	Tssc4	0.159865	4.62472	9.11353	0.00617769	0.563039
	ENSMUSG00000038917.6	3930402G23Rik	0.15968	0.195308	0.525563	0.475897	0.962628
	ENSMUSG00000058420.9	Syt17	0.159674	2.82996	2.14155	0.157089	0.873263
	ENSMUSG00000073478.8	D730003I15Rik	0.159328	2.39665	2.68492	0.115111	0.838346
	ENSMUSG00000020728.18	Cep112	0.159162	2.47276	3.69344	0.067288	0.795553
	ENSMUSG00000015134.16	Aldh1a3	0.159073	0.775572	0.49377	0.489405	0.964689
	ENSMUSG00000074259.11	Gramd2	0.158707	7.78427	19.2234	0.000222298	0.223545
	ENSMUSG00000027959.15	Sass6	0.158601	2.10832	3.24708	0.0848685	0.809966
	ENSMUSG00000114362.2	4933433G19Rik	0.158544	0.149708	0.858588	0.363897	0.944739
	ENSMUSG00000083337.2	Gm11539	0.158544	1.25304	1.00194	0.327409	0.940355
	ENSMUSG00000020155.3	Kcnmb1	0.158543	2.50367	1.56342	0.223921	0.905199
	ENSMUSG00000021747.13	Cfap20dc	0.158535	1.59635	1.7681	0.196845	0.8982
	ENSMUSG00000001039.13	B9d1	0.158523	3.19326	4.49421	0.0451802	0.751839
	ENSMUSG00000080921.5	Rpl38-ps2	0.158501	4.89669	1.2804	0.269655	0.91959
	ENSMUSG00000097890.4	4930547M16Rik	0.158473	0.481846	1.00999	0.325515	0.940355
	ENSMUSG00000038022.12	Mindy4	0.158425	3.84318	10.4988	0.0036606	0.52536
	ENSMUSG00000108037.3	Gm44597	0.15838	3.54607	4.57132	0.0435274	0.751839
	ENSMUSG00000029797.14	Sspo	0.158336	1.95316	2.101	0.160899	0.873263
	ENSMUSG00000070737.11	Tmem35b	0.158271	3.45257	6.14496	0.0210686	0.661764
	ENSMUSG00000045349.16	Sh2d5	0.158262	-0.497862	1.0989	0.397141	0.950294
	ENSMUSG00000020566.20	Atp6v1c2	0.158211	5.82624	12.6984	0.00167911	0.403821
	ENSMUSG00000110902.3	Gm33104	0.158203	1.17525	0.506828	0.48378	0.964453
	ENSMUSG00000082361.7	Btc	0.158177	1.95338	1.75921	0.197934	0.8982
	ENSMUSG00000056501.4	Cebpb	0.158158	5.77223	1.9718	0.173813	0.880077
	ENSMUSG00000028364.16	Tnc	0.158151	4.00569	0.658513	0.425526	0.955112
	ENSMUSG00000089698.2	Gm2541	0.158062	2.30761	1.90365	0.181132	0.886077
	ENSMUSG00000020905.12	Usp43	0.157991	3.98926	4.18003	0.0526886	0.772192
	ENSMUSG00000047246.8	H2bc6	0.157933	2.34379	1.04496	0.317458	0.938637
	ENSMUSG00000100701.2	Gm19587	0.157901	1.65692	0.795587	0.381788	0.946475
	ENSMUSG00000070305.11	Mpzl3	0.15769	2.54943	0.910597	0.350024	0.944722
	ENSMUSG00000020495.14	Smg8	0.157538	4.64774	14.5062	0.000921874	0.37078
	ENSMUSG00000104103.2	Gm9517	0.157517	-0.118044	0.644018	0.430595	0.955119
	ENSMUSG00000085704.3	4921531C22Rik	0.157513	1.56852	2.2126	0.150669	0.870726
	ENSMUSG00000121238.1	ENSMUSG00000121238.1	0.157348	2.26561	2.84824	0.10519	0.824443
	ENSMUSG00000086591.2	Dnah2os	0.157315	1.63924	2.4869	0.128654	0.852335
	ENSMUSG00000108010.2	Gm38708	0.157043	1.49718	1.68177	0.207737	0.905199
	ENSMUSG00000083261.5	Gm7816	0.156965	3.29073	1.95374	0.175716	0.880609
	ENSMUSG00000082820.4	Gm13803	0.156943	1.53109	2.01094	0.169772	0.877861
	ENSMUSG00000033066.18	Gas7	0.156882	4.29708	2.14445	0.15682	0.873263
	ENSMUSG00000041930.8	Fam222a	0.15686	2.75221	2.03454	0.167391	0.874697
	ENSMUSG00000041343.20	Ankrd42	0.156697	3.48013	3.10125	0.0917199	0.816631
	ENSMUSG00000087174.9	5530601H04Rik	0.156604	4.05688	6.73566	0.0162881	0.65138
	ENSMUSG00000106062.2	Gm43820	0.156432	0.0776586	0.754095	0.394285	0.950294
	ENSMUSG00000051550.11	Zfp579	0.156407	5.80733	10.2088	0.00407528	0.528755
	ENSMUSG00000027524.10	Edn3	0.156399	4.60246	2.7442	0.111388	0.829166
	ENSMUSG00000047603.10	Zfp235	0.156384	3.61536	7.30919	0.0127731	0.629245
	ENSMUSG00000115405.2	Gm41307	0.156078	0.306171	0.814418	0.376308	0.946475
	ENSMUSG00000097330.3	Gm26672	0.156072	0.58171	0.549164	0.466269	0.960351
	ENSMUSG00000121137.1	ENSMUSG00000121137.1	0.15591	6.19647	1.87338	0.184502	0.888526
	ENSMUSG00000074826.11	Gm10767	0.155877	0.0234525	0.526884	0.475349	0.962499
	ENSMUSG00000076563.3	Igkv5-48	0.155849	1.14811	0.0261606	0.872942	0.991888
	ENSMUSG00000031493.11	Ggn	0.155778	0.83519	1.33398	0.260131	0.914506
	ENSMUSG00000051029.9	Serpinb1b	0.155752	0.528658	1.00015	0.327832	0.940355
	ENSMUSG00000056458.17	Mok	0.155735	3.32208	1.48065	0.236193	0.907179
	ENSMUSG00000071151.4	Gm4799	0.155717	2.42625	2.26793	0.145887	0.866559
	ENSMUSG00000024210.4	Ip6k3	0.155638	2.0102	1.78803	0.194433	0.896592
	ENSMUSG00000028125.15	Abca4	0.155628	2.9522	3.37739	0.0792416	0.804944
	ENSMUSG00000042895.7	Abra	0.155532	1.58179	0.490257	0.490938	0.964784
	ENSMUSG00000058351.12	Smim4	0.155472	3.49254	4.51769	0.0446695	0.751839
	ENSMUSG00000116614.2	Gm46610	0.155371	0.129344	0.426713	0.520178	0.964784
	ENSMUSG00000027274.17	Mkks	0.155347	3.60255	2.91753	0.101284	0.824443
	ENSMUSG00000032860.6	P2ry2	0.155259	4.20221	4.00902	0.0573644	0.77337
	ENSMUSG00000020878.7	Lrrc46	0.155231	2.65543	1.1714	0.290494	0.931045
	ENSMUSG00000032103.11	Pus3	0.155223	3.24344	3.47887	0.0751563	0.802467
	ENSMUSG00000082998.4	Gm11221	0.155157	1.57969	1.95169	0.175935	0.880609
	ENSMUSG00000113769.2	5033406O09Rik	0.154826	1.04156	1.15638	0.293532	0.932199
	ENSMUSG00000085171.9	D830026I12Rik	0.154752	3.72364	3.76276	0.0649505	0.790952
	ENSMUSG00000021534.9	1700001L19Rik	0.154675	2.1007	1.35178	0.257063	0.914506
	ENSMUSG00000051515.12	Fam181b	0.154586	2.23297	1.12547	0.299919	0.935339
	ENSMUSG00000025504.15	Eps8l2	0.154568	6.95128	7.39401	0.0123287	0.629245
	ENSMUSG00000056130.11	Ticam2	0.154526	2.53798	2.28028	0.144845	0.866356
	ENSMUSG00000048458.9	Inka2	0.154517	4.72775	9.18888	0.00600001	0.559289
	ENSMUSG00000040724.6	Kcna2	0.154486	3.82803	1.95681	0.175391	0.880609
	ENSMUSG00000084304.2	Gm6142	0.154481	1.25741	1.67671	0.208398	0.905199
	ENSMUSG00000026941.17	Mamdc4	0.154451	1.53516	2.38696	0.136201	0.864353
	ENSMUSG00000111897.2	Gm19810	0.154413	1.48648	0.900156	0.352747	0.944722
	ENSMUSG00000028047.12	Thbs3	0.1543	6.67701	2.70903	0.11358	0.835606
	ENSMUSG00000018102.6	H2bc4	0.154245	5.73285	3.17373	0.0882378	0.811159
	ENSMUSG00000086629.10	2810403D21Rik	0.154096	0.720821	1.47421	0.237183	0.907266
	ENSMUSG00000026981.16	Il1rn	0.153967	3.36835	0.731961	0.401202	0.950294
	ENSMUSG00000097466.10	D430036J16Rik	0.153829	2.48731	1.02561	0.321882	0.938637
	ENSMUSG00000092454.2	Gm2991	0.15374	0.498263	0.986803	0.331013	0.941249
	ENSMUSG00000048621.4	Gm6377	0.153646	0.57914	0.154029	0.698381	0.979613
	ENSMUSG00000083836.2	Ldha-ps2	0.153614	0.916668	0.828732	0.37222	0.946176
	ENSMUSG00000017299.14	Dnttip1	0.153531	4.11284	9.22051	0.00592711	0.557626
	ENSMUSG00000032690.17	Oas2	0.153403	4.46773	1.82148	0.190465	0.894749
	ENSMUSG00000085178.2	Kdm6bos	0.153337	0.00365956	0.798349	0.380977	0.946475
	ENSMUSG00000031551.13	Ido1	0.153125	1.06978	0.467309	0.501157	0.964784
	ENSMUSG00000097462.9	9530026P05Rik	0.153124	3.79157	2.55604	0.123722	0.847364
	ENSMUSG00000103906.2	Tigd5	0.153115	2.09521	2.52771	0.125716	0.849467
	ENSMUSG00000006522.18	Itih3	0.153076	1.3072	1.2438	0.276426	0.922466
	ENSMUSG00000022856.10	Tmem41a	0.153055	3.7548	4.43808	0.0464279	0.751839
	ENSMUSG00000090222.3	Ifi203-ps	0.152983	3.72644	1.75441	0.198524	0.8982
	ENSMUSG00000118672.1	Muc4	0.152891	5.52735	1.68954	0.206727	0.905199
	ENSMUSG00000028591.12	Pramel13	0.152644	0.0285789	0.515378	0.480155	0.964319
	ENSMUSG00000114529.2	Gm4939	0.152602	0.684181	1.09136	0.307186	0.938487
	ENSMUSG00000033427.15	Upb1	0.152471	0.461141	0.772073	0.388797	0.948526
	ENSMUSG00000045327.8	6330549D23Rik	0.15241	0.801084	1.39809	0.2493	0.912274
	ENSMUSG00000118295.2	Gm8437	0.152287	0.824539	1.15953	0.292891	0.932156
	ENSMUSG00000085615.4	A330035P11Rik	0.152143	0.928748	1.81618	0.191086	0.895089
	ENSMUSG00000118462.2	ENSMUSG00000118462.2	0.151973	4.26552	2.29762	0.143396	0.866356
	ENSMUSG00000062785.15	Kcnc3	0.151793	6.58547	6.4408	0.0185037	0.658374
	ENSMUSG00000085338.2	2410004I01Rik	0.151704	2.96958	2.05305	0.165552	0.874182
	ENSMUSG00000028441.13	1110017D15Rik	0.151616	3.8924	1.8299	0.189481	0.894277
	ENSMUSG00000036880.11	Acaa2	0.151546	6.6905	3.89109	0.0608635	0.77889
	ENSMUSG00000081254.2	Gm12112	0.151479	1.76313	0.794785	0.382024	0.946475
	ENSMUSG00000008999.8	Bmp7	0.151445	2.31191	1.56129	0.224227	0.905199
	ENSMUSG00000096950.3	Gm9530	0.151422	0.44702	1.53589	0.22791	0.906553
	ENSMUSG00000024175.3	Tekt4	0.151415	3.54968	2.35092	0.13905	0.865479
	ENSMUSG00000026679.4	Enkur	0.15141	3.89242	1.62309	0.215571	0.905199
	ENSMUSG00000097183.4	Gm17501	0.151373	2.2315	0.84544	0.367528	0.944739
	ENSMUSG00000028716.16	Pdzk1ip1	0.151327	4.36999	1.95225	0.175874	0.880609
	ENSMUSG00000018362.15	Kpna2	0.1513	5.11121	5.11344	0.0336565	0.724879
	ENSMUSG00000106755.2	Tpi-rs11	0.15105	-0.163345	0.407345	0.529717	0.966777
	ENSMUSG00000025332.15	Kdm5c	0.1508	6.88363	3.21737	0.0862148	0.811159
	ENSMUSG00000019831.15	Wasf1	0.150798	-0.210908	0.49879	0.487229	0.964453
	ENSMUSG00000047643.6	Gm5454	0.1506	1.4876	1.40657	0.247912	0.909794
	ENSMUSG00000061322.16	Dnai1	0.150599	3.58809	1.70009	0.205364	0.905199
	ENSMUSG00000047642.16	D930020B18Rik	0.150508	1.24143	0.839522	0.36918	0.945054
	ENSMUSG00000030431.9	Tmem238	0.150483	3.23818	3.45026	0.076283	0.802467
	ENSMUSG00000107502.2	Gm44065	0.150482	0.522831	1.14292	0.296291	0.933945
	ENSMUSG00000117916.3	9630028I04Rik	0.150434	3.63061	1.25431	0.274459	0.922106
	ENSMUSG00000029372.8	Ppbp	0.150394	3.49092	0.315803	0.579656	0.972677
	ENSMUSG00000011463.6	Cpb1	0.150293	0.411781	0.590368	0.450209	0.958077
	ENSMUSG00000080902.2	Ywhaq-ps3	0.150177	4.75513	4.40152	0.0472613	0.751839
	ENSMUSG00000021388.15	Aspn	0.150092	3.23381	1.54619	0.226407	0.905199
	ENSMUSG00000047033.3	Pcdhb15	0.150064	0.977111	1.13737	0.297438	0.933945
	ENSMUSG00000037492.17	Zmat4	0.149882	1.47638	0.6984	0.412046	0.954393
	ENSMUSG00000039084.9	Chad	0.149871	4.98454	0.715313	0.406526	0.951598
	ENSMUSG00000031351.16	Zfp185	0.149868	3.98322	3.27365	0.0836848	0.808692
	ENSMUSG00000048012.20	Zfp473	0.14975	-0.406437	0.544208	0.468264	0.960433
	ENSMUSG00000031831.7	Dnaaf1	0.149728	3.22462	1.59746	0.219108	0.905199
	ENSMUSG00000063011.8	Msln	0.149547	6.17037	2.31441	0.14201	0.866356
	ENSMUSG00000035930.10	Chst4	0.149532	3.01697	1.55279	0.225451	0.905199
	ENSMUSG00000048520.17	Fbxl13	0.149507	2.23789	1.09213	0.307018	0.938487
	ENSMUSG00000044813.16	Shb	0.14945	4.86095	5.01662	0.0352174	0.72769
	ENSMUSG00000042269.16	Cibar2	0.149437	2.90887	1.56374	0.223875	0.905199
	ENSMUSG00000026435.16	Slc45a3	0.149178	3.90232	3.17614	0.0881246	0.811159
	ENSMUSG00000021411.17	Pxdc1	0.149035	7.07337	3.02481	0.0955658	0.820335
	ENSMUSG00000110545.2	Gm7730	0.1489	1.07675	0.72602	0.40309	0.950351
	ENSMUSG00000001496.16	Nkx2-1	0.148799	7.50632	7.54154	0.0115958	0.616764
	ENSMUSG00000110686.2	Gm45855	0.148762	2.36153	1.65165	0.211713	0.905199
	ENSMUSG00000101628.2	Gm28177	0.148499	1.03753	0.233986	0.633224	0.97542
	ENSMUSG00000034930.17	Rtkn	0.148448	5.28958	5.71371	0.0255467	0.681691
	ENSMUSG00000037016.12	Frem2	0.148363	1.27014	2.05593	0.165267	0.874182
	ENSMUSG00000085058.3	8030453O22Rik	0.14836	-0.188076	0.709739	0.408333	0.952805
	ENSMUSG00000023243.10	Kcnk5	0.148232	3.75536	3.26553	0.0840442	0.808692
	ENSMUSG00000028527.19	Ak4	0.148225	2.11443	1.56144	0.224205	0.905199
	ENSMUSG00000026773.20	Pfkfb3	0.148171	7.02512	2.93383	0.10039	0.824443
	ENSMUSG00000073016.4	Uprt	0.148147	1.08025	0.590064	0.450324	0.958077
	ENSMUSG00000085875.4	Gm12905	0.148027	0.321747	0.531987	0.473244	0.961656
	ENSMUSG00000048445.7	Ccdc57	0.147995	3.0977	4.61501	0.0426213	0.751839
	ENSMUSG00000114753.2	Gm34059	0.147879	1.8767	0.438119	0.514706	0.964784
	ENSMUSG00000103039.2	Gm37123	0.147824	1.31355	0.624398	0.437608	0.956531
	ENSMUSG00000029074.15	Ttll10	0.147823	2.39219	2.79011	0.108602	0.824443
	ENSMUSG00000032583.8	Mon1a	0.147694	4.49422	7.71429	0.0107983	0.599978
	ENSMUSG00000115009.2	G930009F23Rik	0.147611	1.40992	0.957726	0.338092	0.943144
	ENSMUSG00000085379.3	2310058D17Rik	0.14759	1.81925	1.91345	0.180055	0.884308
	ENSMUSG00000035042.3	Ccl5	0.147585	4.25578	1.14054	0.296782	0.933945
	ENSMUSG00000020183.12	Cpm	0.14758	8.10357	9.58817	0.00514761	0.539328
	ENSMUSG00000078532.10	Nkain1	0.147542	1.49606	0.978414	0.333034	0.941249
	ENSMUSG00000035112.18	Wnk4	0.147513	3.96274	3.51044	0.073935	0.80107
	ENSMUSG00000056899.11	Immp2l	0.147468	0.789446	0.66225	0.424234	0.955112
	ENSMUSG00000045551.8	Fpr1	0.147424	3.6295	1.87485	0.184337	0.888526
	ENSMUSG00000046168.10	Kcnrg	0.147274	2.91713	1.61369	0.21686	0.905199
	ENSMUSG00000056666.14	Retsat	0.147254	4.93347	4.99716	0.0355408	0.72769
	ENSMUSG00000079165.11	Sap25	0.14712	3.80272	2.11877	0.159216	0.873263
	ENSMUSG00000024354.14	Slc23a1	0.147009	3.90829	2.48708	0.128641	0.852335
	ENSMUSG00000028068.15	Iqgap3	0.146993	2.08335	0.197452	0.660999	0.97542
	ENSMUSG00000072572.10	Slc39a2	0.146992	2.05175	1.12363	0.300305	0.935339
	ENSMUSG00000030747.6	Dgat2	0.146959	4.86036	0.197334	0.661094	0.97542
	ENSMUSG00000036225.16	Kctd1	0.146718	3.24281	2.01491	0.169368	0.877635
	ENSMUSG00000121195.1	ENSMUSG00000121195.1	0.146671	2.07601	1.94442	0.176709	0.881739
	ENSMUSG00000044937.16	Ttc41	0.14661	2.7041	2.86168	0.104419	0.824443
	ENSMUSG00000109118.3	Gm32031	0.146566	1.03574	1.25164	0.274957	0.922106
	ENSMUSG00000078651.9	Aoc2	0.146541	2.05574	3.01657	0.0959919	0.820335
	ENSMUSG00000072115.12	Ang	0.146428	5.12666	2.80796	0.107541	0.824443
	ENSMUSG00000027173.8	Depdc7	0.146302	0.618032	0.725947	0.403114	0.950351
	ENSMUSG00000031398.14	Plxna3	0.146228	3.54033	3.56799	0.0717668	0.800275
	ENSMUSG00000028139.6	Riiad1	0.146084	2.43762	1.3362	0.259746	0.914506
	ENSMUSG00000047777.10	Phf13	0.146071	4.62807	10.3565	0.00385787	0.528755
	ENSMUSG00000060512.8	0610040J01Rik	0.14597	4.21518	4.8769	0.0376152	0.73228
	ENSMUSG00000038240.14	Pdss2	0.145899	2.43662	5.28221	0.0311175	0.71631
	ENSMUSG00000032531.16	Amotl2	0.145786	8.20353	7.67168	0.0109892	0.607583
	ENSMUSG00000046598.16	Bdh1	0.145694	1.9337	0.68349	0.417007	0.954406
	ENSMUSG00000033863.3	Klf9	0.145606	7.40203	2.65635	0.116958	0.84051
	ENSMUSG00000030895.10	Hpx	0.145535	0.59499	0.700107	0.411484	0.954253
	ENSMUSG00000093739.2	Gm20692	0.145367	0.992637	0.959388	0.337681	0.943144
	ENSMUSG00000056598.17	Drc3	0.14527	4.85256	1.34113	0.258893	0.914506
	ENSMUSG00000113679.2	Gm10432	0.145227	-0.158568	0.410579	0.528102	0.966777
	ENSMUSG00000059430.15	Actg2	0.145194	3.73668	0.741207	0.398291	0.950294
	ENSMUSG00000075012.5	Fjx1	0.145116	2.73077	1.12565	0.29988	0.935339
	ENSMUSG00000028850.3	Gpatch3	0.145063	2.53243	2.44441	0.131801	0.85843
	ENSMUSG00000030486.10	Zfp108	0.144984	1.72811	2.373	0.137297	0.865127
	ENSMUSG00000045730.5	Adrb2	0.144942	5.66054	2.15207	0.156118	0.873263
	ENSMUSG00000064284.13	Cdpf1	0.144902	4.05057	4.80328	0.0389522	0.737185
	ENSMUSG00000051076.9	Vtcn1	0.144888	2.40063	0.894922	0.354124	0.944722
	ENSMUSG00000120441.1	ENSMUSG00000120441.1	0.144888	0.108986	0.597405	0.447556	0.958077
	ENSMUSG00000032118.17	Fez1	0.144841	1.51285	1.07386	0.311006	0.938487
	ENSMUSG00000033685.14	Ucp2	0.144815	8.8898	3.74376	0.0655818	0.79143
	ENSMUSG00000040441.13	Slc26a10	0.144788	2.54919	0.650494	0.428319	0.955112
	ENSMUSG00000116288.2	Gm41349	0.144732	-0.0095478	0.493337	0.489594	0.964689
	ENSMUSG00000104943.2	Gm42868	0.14471	2.01581	0.906168	0.351175	0.944722
	ENSMUSG00000033589.5	Reep4	0.144655	4.72083	7.12401	0.0138064	0.632457
	ENSMUSG00000101693.2	Gm19461	0.144537	2.99503	1.30443	0.265328	0.918041
	ENSMUSG00000024184.16	Pdia2	0.144514	0.768255	0.589353	0.450594	0.958077
	ENSMUSG00000022123.10	Scel	0.144297	6.36715	1.65562	0.211183	0.905199
	ENSMUSG00000043770.11	Gm12481	0.144258	4.95769	1.81025	0.191785	0.895168
	ENSMUSG00000094627.3	Gm10182	0.144146	3.29633	2.23984	0.148292	0.870208
	ENSMUSG00000081824.6	Ndufs5-ps	0.14389	2.20777	1.10686	0.303854	0.937886
	ENSMUSG00000064057.13	Scgb3a1	0.143878	7.16333	0.437289	0.5151	0.964784
	ENSMUSG00000070661.8	Rnf186	0.143693	4.06027	2.53546	0.125167	0.849467
	ENSMUSG00000053600.9	Zfp472	0.143658	3.37158	7.83348	0.0102835	0.599978
	ENSMUSG00000038612.17	Mcl1	0.143645	8.46332	11.4976	0.00255082	0.474434
	ENSMUSG00000063260.3	Syt10	0.143589	-0.225265	0.426676	0.520197	0.964784
	ENSMUSG00000039182.7	AW209491	0.143516	3.78139	7.78032	0.0105097	0.599978
	ENSMUSG00000111334.2	Gm30015	0.143444	0.612616	0.878263	0.358558	0.944739
	ENSMUSG00000081929.2	Rps11-ps2	0.14337	0.597016	0.364615	0.551951	0.967409
	ENSMUSG00000103409.3	Lsmem2	0.14334	2.09963	2.83181	0.106141	0.824443
	ENSMUSG00000048787.14	Dcun1d3	0.143326	4.53141	4.19511	0.0522976	0.769039
	ENSMUSG00000121487.1	ENSMUSG00000121487.1	0.143273	-0.0366239	0.634611	0.433935	0.955485
	ENSMUSG00000107434.2	Gm4640	0.143231	-0.473345	0.270683	0.607919	0.973815
	ENSMUSG00000004947.16	Dtx2	0.143204	4.31186	5.88847	0.0236153	0.675704
	ENSMUSG00000035165.15	Kcne3	0.143149	1.18291	0.49689	0.488051	0.964453
	ENSMUSG00000120454.1	ENSMUSG00000120454.1	0.143121	1.80921	1.89822	0.181731	0.886122
	ENSMUSG00000114470.2	Gm49395	0.143121	2.38794	0.49917	0.487065	0.964453
	ENSMUSG00000062609.15	Kcnj15	0.143096	6.84639	3.57051	0.0716736	0.800275
	ENSMUSG00000030200.14	Bcl2l14	0.143001	2.74498	1.99793	0.171102	0.879052
	ENSMUSG00000004540.8	Psg17	0.142999	-0.341975	0.402087	0.532362	0.966793
	ENSMUSG00000038763.13	Alpk3	0.142904	2.35417	0.510321	0.482293	0.964453
	ENSMUSG00000021871.20	Gm49342	0.14272	3.52818	2.1554	0.155812	0.873263
	ENSMUSG00000115783.3	Bc1	0.142572	2.76702	0.186063	0.670289	0.97542
	ENSMUSG00000061802.7	Odad2	0.142344	2.90776	0.953206	0.339211	0.943144
	ENSMUSG00000090157.8	Gm16534	0.142311	1.37334	1.05613	0.314944	0.938637
	ENSMUSG00000041842.16	Fhdc1	0.142296	6.07791	7.0857	0.0140316	0.634343
	ENSMUSG00000113106.2	Gm47139	0.14204	2.50548	0.563201	0.460694	0.959357
	ENSMUSG00000115756.2	Gm49519	0.141803	0.214541	0.337855	0.566806	0.970314
	ENSMUSG00000049676.15	Catsperg1	0.141785	3.07615	2.84209	0.105545	0.824443
	ENSMUSG00000010067.14	Rassf1	0.141775	5.91388	12.6888	0.0016846	0.403821
	ENSMUSG00000115801.2	Gm55330	0.141744	3.70158	0.673444	0.420401	0.954964
	ENSMUSG00000045348.17	Nyap1	0.14171	1.51109	1.07736	0.310235	0.938487
	ENSMUSG00000120920.1	ENSMUSG00000120920.1	0.141502	2.02518	1.29673	0.266705	0.918375
	ENSMUSG00000020904.12	Cfap52	0.141487	3.85383	2.12729	0.158416	0.873263
	ENSMUSG00000080877.2	Rpl22-ps1	0.141468	2.22566	0.89911	0.353022	0.944722
	ENSMUSG00000020335.14	Zfp354b	0.141426	1.31319	1.38261	0.251861	0.913858
	ENSMUSG00000029868.15	Trpv6	0.141399	2.85828	1.45584	0.240036	0.907312
	ENSMUSG00000025340.15	Rabgef1	0.141374	5.76932	15.9462	0.000585188	0.301182
	ENSMUSG00000036854.15	Hspb6	0.141305	4.31474	0.405935	0.530423	0.966777
	ENSMUSG00000037621.9	Atoh8	0.141269	4.35877	2.7705	0.109782	0.825926
	ENSMUSG00000078954.10	Arhgap8	0.141157	3.90534	6.12139	0.0212894	0.664069
	ENSMUSG00000094410.9	Zbed6	0.141002	2.75243	0.425901	0.520572	0.964784
	ENSMUSG00000037681.14	Esyt3	0.140988	4.3742	2.48175	0.12903	0.852643
	ENSMUSG00000120660.1	ENSMUSG00000120660.1	0.140972	0.0344113	0.572677	0.456992	0.958736
	ENSMUSG00000026018.13	Ica1l	0.140799	0.25385	0.391411	0.537808	0.967409
	ENSMUSG00000078894.10	2210418O10Rik	0.140788	2.33144	0.353601	0.557972	0.967564
	ENSMUSG00000037279.14	Ovol2	0.140755	1.57937	1.12078	0.300904	0.935339
	ENSMUSG00000037683.15	Armc3	0.140753	2.62458	0.965323	0.336222	0.943144
	ENSMUSG00000087014.2	ENSMUSG00000087014.2	0.140727	0.163008	0.612133	0.442084	0.958077
	ENSMUSG00000043541.17	Casc1	0.140703	4.03657	1.13955	0.296987	0.933945
	ENSMUSG00000045092.9	S1pr1	0.140636	8.30785	5.55722	0.0274267	0.696574
	ENSMUSG00000020601.9	Trib2	0.140605	6.55941	7.88251	0.0100796	0.599942
	ENSMUSG00000040714.15	Klc3	0.140514	3.19043	1.36484	0.254843	0.914506
	ENSMUSG00000018581.16	Dnah11	0.140511	4.29877	1.6272	0.21501	0.905199
	ENSMUSG00000029279.16	Brdt	0.140462	1.43502	1.17716	0.289341	0.929536
	ENSMUSG00000021260.9	Hhipl1	0.140389	2.20948	1.3323	0.260422	0.914506
	ENSMUSG00000031881.7	Cdh16	0.140382	3.4334	0.63853	0.432538	0.955477
	ENSMUSG00000121247.1	ENSMUSG00000121247.1	0.140294	2.96198	2.43876	0.132226	0.858855
	ENSMUSG00000021417.16	Eci2	0.140222	5.83322	6.51691	0.0179014	0.655476
	ENSMUSG00000037447.17	Arid5a	0.140076	4.67983	3.64993	0.0688041	0.796512
	ENSMUSG00000048644.9	Ctxn1	0.140031	4.1428	1.68559	0.20724	0.905199
	ENSMUSG00000022949.10	Clic6	0.140005	5.74139	2.06676	0.164205	0.873901
	ENSMUSG00000006154.14	Eps8l1	0.139997	5.80705	1.05223	0.315817	0.938637
	ENSMUSG00000101599.2	Gm20342	0.139884	3.03309	1.64567	0.212514	0.905199
	ENSMUSG00000032593.6	Amigo3	0.139838	2.60259	4.38932	0.0475434	0.751839
	ENSMUSG00000086382.3	Chrna1os	0.139826	0.126834	0.587016	0.451482	0.958077
	ENSMUSG00000039021.16	Ttc16	0.139824	4.46185	1.28746	0.268375	0.919297
	ENSMUSG00000031344.12	Gabrq	0.139801	0.403239	0.2914	0.594589	0.972677
	ENSMUSG00000052951.6	C130021I20Rik	0.139759	-0.406468	0.217559	0.645358	0.97542
	ENSMUSG00000107481.2	4833403J16Rik	0.139658	2.82615	2.17443	0.154078	0.873263
	ENSMUSG00000027298.18	Tyro3	0.139619	4.44887	5.00156	0.0354674	0.72769
	ENSMUSG00000006930.16	Hap1	0.139592	4.50871	4.08325	0.0552793	0.77337
	ENSMUSG00000026409.15	Pfkfb2	0.139505	5.21744	6.48262	0.0181701	0.657554
	ENSMUSG00000113750.2	Gm5628	0.139481	0.98033	1.33911	0.259242	0.914506
	ENSMUSG00000095675.3	Ccl21b	0.139417	4.54742	0.270665	0.607931	0.973815
	ENSMUSG00000096596.3	Gm10591	0.139417	4.54742	0.270665	0.607931	0.973815
	ENSMUSG00000114566.2	Gm48500	0.139316	0.330763	0.501003	0.486276	0.964453
	ENSMUSG00000036432.9	Siah2	0.139256	3.68792	5.24049	0.0317245	0.71631
	ENSMUSG00000022385.12	Gtse1	0.139211	0.815443	0.497623	0.487734	0.964453
	ENSMUSG00000105843.3	Gm19439	0.139176	2.92466	1.77514	0.195989	0.8982
	ENSMUSG00000043421.9	Hilpda	0.139176	6.63916	2.82836	0.106342	0.824443
	ENSMUSG00000063049.5	Ing2	0.139129	3.86052	7.60568	0.0112924	0.613681
	ENSMUSG00000118138.2	Gm50322	0.139116	-0.40777	0.402612	0.532097	0.966777
	ENSMUSG00000069008.4	Gm5537	0.139069	5.09233	0.795681	0.381761	0.946475
	ENSMUSG00000044434.6	Gm9791	0.138963	1.222	1.32889	0.261017	0.914506
	ENSMUSG00000086914.3	Gm16124	0.138957	1.60073	1.51974	0.230294	0.906553
	ENSMUSG00000074457.11	S100a16	0.138899	6.94384	2.80927	0.107463	0.824443
	ENSMUSG00000107092.2	Gm7993	0.138691	2.08745	1.01025	0.325453	0.940355
	ENSMUSG00000055994.16	Nod2	0.138666	3.18632	1.99206	0.171707	0.879052
	ENSMUSG00000120997.1	ENSMUSG00000120997.1	0.138577	1.0022	0.462446	0.50337	0.964784
	ENSMUSG00000048706.4	Lurap1l	0.138567	5.68023	6.18549	0.0206949	0.661062
	ENSMUSG00000030922.13	Lyrm1	0.138507	2.40932	2.76489	0.110122	0.825983
	ENSMUSG00000017861.12	Mybl2	0.138331	1.86983	1.9523	0.17587	0.880609
	ENSMUSG00000045031.19	Cetn4	0.138109	2.71694	0.964074	0.336528	0.943144
	ENSMUSG00000086390.9	1810019D21Rik	0.138064	5.89831	6.9689	0.0147435	0.64499
	ENSMUSG00000047963.8	Stbd1	0.137916	5.53148	1.24174	0.276814	0.922466
	ENSMUSG00000095576.6	Fmo6	0.137561	-0.144983	0.250746	0.621379	0.975385
	ENSMUSG00000118458.2	Gm10599	0.137416	-0.347255	0.580209	0.503425	0.964784
	ENSMUSG00000036995.8	Asap3	0.137387	4.47596	5.23943	0.03174	0.71631
	ENSMUSG00000108402.2	9430064I24Rik	0.137351	2.64187	2.17024	0.154458	0.873263
	ENSMUSG00000103548.2	Gm37670	0.137345	-0.436272	0.324702	0.574401	0.972175
	ENSMUSG00000112433.2	Gm30122	0.137316	1.66138	1.8766	0.18414	0.888421
	ENSMUSG00000085408.3	C530005A16Rik	0.137294	3.33579	1.40706	0.247832	0.909794
	ENSMUSG00000017679.17	Ttpal	0.137181	5.37111	6.59234	0.0173258	0.655321
	ENSMUSG00000083013.2	Gm12978	0.137045	-0.390571	0.29274	0.593748	0.972677
	ENSMUSG00000007379.16	Dennd2c	0.137034	3.44885	2.17469	0.154054	0.873263
	ENSMUSG00000025198.17	Erlin1	0.136928	4.95407	9.58664	0.00515059	0.539328
	ENSMUSG00000009145.7	Dqx1	0.136928	3.29914	3.02898	0.0953514	0.820335
	ENSMUSG00000025038.8	Efhc2	0.136858	0.191334	0.366288	0.551047	0.967409
	ENSMUSG00000054422.8	Fabp1	0.136814	2.44344	0.750161	0.395502	0.950294
	ENSMUSG00000040728.16	Esrp1	0.136788	5.12646	2.32378	0.141243	0.866356
	ENSMUSG00000108218.4	Or2y7	0.136702	1.13313	0.907505	0.350827	0.944722
	ENSMUSG00000083396.2	Gm15542	0.136688	5.11883	2.87112	0.103881	0.824443
	ENSMUSG00000018143.11	Mafk	0.136641	6.46296	5.50508	0.0280871	0.699241
	ENSMUSG00000114025.2	Gm49331	0.136519	1.43719	0.210145	0.651019	0.97542
	ENSMUSG00000102101.2	Zbtb11os1	0.136516	2.30055	2.0005	0.170839	0.878751
	ENSMUSG00000060600.16	Eno3	0.136282	4.94809	0.310313	0.582948	0.972677
	ENSMUSG00000024186.16	Rgs11	0.136127	5.31205	5.7631	0.0249836	0.681691
	ENSMUSG00000039187.17	Fanci	0.136012	1.0593	1.10218	0.304854	0.937886
	ENSMUSG00000052293.15	Taf9	0.135953	1.90539	0.514746	0.480421	0.964453
	ENSMUSG00000008307.12	1700109H08Rik	0.135916	0.775902	0.415476	0.525674	0.966562
	ENSMUSG00000041328.17	Pcf11	0.135897	6.00621	4.52576	0.0444955	0.751839
	ENSMUSG00000025785.6	Exosc7	0.135889	5.61681	4.49255	0.0452165	0.751839
	ENSMUSG00000090002.3	Gm16006	0.135863	0.444544	0.762041	0.391845	0.948915
	ENSMUSG00000055632.19	Hmcn2	0.135845	2.29074	0.458091	0.505367	0.964784
	ENSMUSG00000039911.14	Spsb1	0.135819	4.71528	4.8154	0.0387285	0.737185
	ENSMUSG00000029026.18	Trp73	0.135797	3.80892	1.16159	0.292474	0.932011
	ENSMUSG00000003444.9	Med29	0.135769	3.55917	4.95517	0.0362502	0.728659
	ENSMUSG00000032482.10	Cspg5	0.135741	-0.407375	0.503524	0.485193	0.964453
	ENSMUSG00000102923.3	Gm31728	0.135711	-0.0901251	0.869592	0.360896	0.944739
	ENSMUSG00000020604.14	Arsg	0.135683	3.02281	1.48587	0.235394	0.907179
	ENSMUSG00000066270.4	Gm10157	0.135645	3.38701	2.75306	0.110844	0.82748
	ENSMUSG00000103839.2	Gm37607	0.135514	1.46919	1.22433	0.280118	0.923124
	ENSMUSG00000038859.8	Baiap2l1	0.135504	5.55155	6.73634	0.0162833	0.65138
	ENSMUSG00000102840.2	Gm38037	0.135489	0.0825202	0.536528	0.471383	0.961126
	ENSMUSG00000034227.8	Foxj1	0.135474	6.69234	1.0873	0.308065	0.938487
	ENSMUSG00000028689.15	Ccdc163	0.135342	3.64865	2.61898	0.119426	0.844055
	ENSMUSG00000057068.16	Fam47e	0.135224	3.59798	1.4615	0.239153	0.907312
	ENSMUSG00000063889.17	Crem	0.135196	3.49975	4.56304	0.0437016	0.751839
	ENSMUSG00000105283.3	Gm33370	0.135154	1.03463	1.82768	0.18974	0.894277
	ENSMUSG00000009070.15	Rsph14	0.135135	2.14717	0.787943	0.384046	0.94726
	ENSMUSG00000073867.3	AA474408	0.135028	0.0525616	0.665348	0.423168	0.955112
	ENSMUSG00000111877.2	Gm6477	0.134971	2.66632	3.21985	0.0861015	0.811159
	ENSMUSG00000029660.11	Tex26	0.134966	1.48861	0.796228	0.3816	0.946475
	ENSMUSG00000041598.8	Cdc42ep4	0.134862	7.20828	4.16945	0.0529651	0.77337
	ENSMUSG00000032122.16	Slc37a2	0.134825	2.98035	0.924836	0.346357	0.944294
	ENSMUSG00000033152.14	Podxl2	0.134713	3.20599	1.94966	0.176149	0.880609
	ENSMUSG00000033731.11	3300002A11Rik	0.134673	2.83207	0.92286	0.346862	0.944294
	ENSMUSG00000051228.6	Nyx	0.134661	0.578594	0.398961	0.533946	0.967409
	ENSMUSG00000001300.17	Efnb2	0.134582	7.92564	3.82287	0.0629984	0.785417
	ENSMUSG00000037262.8	Kin	0.13442	3.95746	5.84782	0.0240495	0.675704
	ENSMUSG00000075569.11	Rsph10b	0.134247	4.52792	1.27815	0.270065	0.91959
	ENSMUSG00000042035.12	Igsf3	0.134115	4.65625	2.61974	0.119375	0.844055
	ENSMUSG00000000792.3	Slc5a5	0.134019	-0.374415	0.548713	0.46645	0.960351
	ENSMUSG00000019866.16	Crybg1	0.13398	4.64909	0.825826	0.373045	0.946266
	ENSMUSG00000001943.9	Vsig2	0.133959	4.63706	3.33752	0.0809162	0.806508
	ENSMUSG00000037446.15	Tulp1	0.133824	1.14302	0.856261	0.364535	0.944739
	ENSMUSG00000084128.11	Esrp2	0.133817	5.65803	5.1017	0.0338414	0.726187
	ENSMUSG00000021025.9	Nfkbia	0.133722	6.7314	5.24299	0.0316877	0.71631
	ENSMUSG00000094626.2	Tmem121b	0.133669	2.98622	2.20724	0.151142	0.871158
	ENSMUSG00000062691.11	ENSMUSG00000062691.11	0.133524	2.86603	3.6865	0.0675269	0.795553
	ENSMUSG00000031893.8	Tsnaxip1	0.133445	3.15189	1.09786	0.305782	0.938258
	ENSMUSG00000059901.13	Adamts14	0.133416	3.00019	1.64909	0.212055	0.905199
	ENSMUSG00000096967.4	Gm26621	0.133413	2.52459	0.423825	0.521581	0.96499
	ENSMUSG00000120134.1	ENSMUSG00000120134.1	0.133411	3.60802	0.520461	0.478022	0.96352
	ENSMUSG00000086753.2	Gm15751	0.133322	2.38207	1.45738	0.239796	0.907312
	ENSMUSG00000042417.6	Ccno	0.133298	1.85728	0.292757	0.593738	0.972677
	ENSMUSG00000041556.9	Fbxo2	0.133278	1.4063	0.588495	0.450919	0.958077
	ENSMUSG00000086728.4	Man2c1os	0.133183	1.04709	0.713116	0.407237	0.95207
	ENSMUSG00000030149.16	Klrk1	0.133174	2.90069	1.1145	0.30223	0.936458
	ENSMUSG00000024033.11	Rsph1	0.133132	4.56612	1.33097	0.260653	0.914506
	ENSMUSG00000039771.14	Polr2j	0.13312	4.30679	4.41472	0.0469586	0.751839
	ENSMUSG00000004473.11	Clec11a	0.133098	2.89865	0.821927	0.374155	0.946266
	ENSMUSG00000025529.15	Zfp711	0.133089	1.06033	0.615858	0.440717	0.958077
	ENSMUSG00000105135.2	Gm43667	0.133067	2.17315	1.51226	0.231408	0.906553
	ENSMUSG00000061397.9	Krt79	0.133014	3.79018	1.24299	0.276579	0.922466
	ENSMUSG00000090996.2	Gm20458	0.133005	-0.333534	0.0136512	0.908017	0.996252
	ENSMUSG00000031840.15	Rab3a	0.132972	4.36242	6.35519	0.0192083	0.659775
	ENSMUSG00000031971.16	Ccsap	0.132844	1.49483	1.11579	0.301958	0.936208
	ENSMUSG00000036959.16	Bcorl1	0.132815	4.93929	6.15597	0.0209663	0.661062
	ENSMUSG00000032514.12	Ttc21a	0.132676	5.45427	1.22649	0.279706	0.922466
	ENSMUSG00000026650.16	Meig1	0.132621	2.30822	1.16735	0.291309	0.931045
	ENSMUSG00000006344.18	Ggt5	0.132362	3.8485	2.99902	0.0969056	0.821595
	ENSMUSG00000035202.9	Lars2	0.132311	8.10464	0.115463	0.737137	0.981872
	ENSMUSG00000019774.9	Mtrf1l	0.132252	2.81561	3.76252	0.0649583	0.790952
	ENSMUSG00000083798.2	Gm14584	0.132152	1.199	1.14011	0.296871	0.933945
	ENSMUSG00000009654.5	Oit3	0.132063	0.407692	0.564912	0.460022	0.959089
	ENSMUSG00000020234.11	Tektip1	0.131989	2.54605	1.21984	0.28098	0.924525
	ENSMUSG00000102425.2	Gm26616	0.131973	-0.361855	0.397477	0.534701	0.967409
	ENSMUSG00000027412.13	Lpin3	0.131967	4.13019	1.4932	0.234277	0.907179
	ENSMUSG00000000416.17	Cttnbp2	0.131956	3.70563	1.49162	0.234519	0.907179
	ENSMUSG00000063727.4	Tnfrsf11b	0.131945	2.30024	1.69142	0.206483	0.905199
	ENSMUSG00000074178.4	Gm10638	0.131868	1.21882	1.09808	0.305735	0.938258
	ENSMUSG00000028410.14	Dnaja1	0.131784	6.71508	2.66041	0.116693	0.839945
	ENSMUSG00000040511.15	Pvr	0.131614	5.31893	4.81757	0.0386885	0.737185
	ENSMUSG00000086425.9	F730016J06Rik	0.131562	-0.499271	0.247838	0.623397	0.97542
	ENSMUSG00000058152.9	Chsy3	0.131551	1.84149	1.59711	0.219157	0.905199
	ENSMUSG00000085521.5	4930526A20Rik	0.13149	1.81539	1.3597	0.255713	0.914506
	ENSMUSG00000052188.7	Gm14964	0.13145	3.19444	2.0008	0.170808	0.878751
	ENSMUSG00000024579.8	Pcyox1l	0.131423	3.17748	2.43303	0.132658	0.859454
	ENSMUSG00000074673.16	Ttll9	0.131417	2.23898	0.775537	0.387753	0.948261
	ENSMUSG00000078877.12	Gm14295	0.131392	2.55383	1.32406	0.26186	0.914993
	ENSMUSG00000047363.5	Cstad	0.131348	-0.117868	0.210964	0.650388	0.97542
	ENSMUSG00000022773.20	Ypel1	0.131287	2.3364	2.19225	0.152474	0.87254
	ENSMUSG00000015053.15	Gata2	0.131221	7.24665	3.61953	0.0698865	0.797225
	ENSMUSG00000004951.11	Hspb1	0.131171	6.67063	0.96691	0.335833	0.942945
	ENSMUSG00000020052.10	Ascl1	0.131165	-0.197972	0.153568	0.698809	0.979613
	ENSMUSG00000074024.7	4632427E13Rik	0.13099	1.38467	1.07549	0.310648	0.938487
	ENSMUSG00000071604.6	Entrep1	0.130944	7.15737	2.21603	0.150368	0.870726
	ENSMUSG00000092470.2	Gm20518	0.130894	1.31983	0.629517	0.435761	0.955822
	ENSMUSG00000022793.18	B4galt4	0.130806	5.67091	7.28315	0.0129131	0.629245
	ENSMUSG00000120092.1	ENSMUSG00000120092.1	0.130805	-0.323789	0.850247	0.366195	0.944739
	ENSMUSG00000074595.10	Wfdc6a	0.130783	0.485742	0.90874	0.350506	0.944722
	ENSMUSG00000049287.6	Iba57	0.130759	3.01473	2.7643	0.110158	0.825983
	ENSMUSG00000038576.16	Susd4	0.130653	4.43935	1.86195	0.185795	0.890017
	ENSMUSG00000056592.15	Zfp658	0.130621	3.30532	2.83583	0.105907	0.824443
	ENSMUSG00000034796.15	Cpne7	0.13058	0.244458	0.509142	0.482794	0.964453
	ENSMUSG00000092178.3	Gm45351	0.130548	0.167723	0.243384	0.626519	0.97542
	ENSMUSG00000034035.19	Ccdc17	0.130529	5.88989	1.11307	0.302533	0.936641
	ENSMUSG00000109325.2	Krt8-ps	0.130478	3.25704	1.62464	0.215359	0.905199
	ENSMUSG00000035834.12	Polr3g	0.130463	2.39053	0.438303	0.514619	0.964784
	ENSMUSG00000020363.7	Gfpt2	0.130392	3.80168	1.41376	0.246742	0.908231
	ENSMUSG00000056962.12	Jmjd6	0.130326	5.45221	13.5738	0.00125064	0.400582
	ENSMUSG00000104882.2	Gm43096	0.13031	0.600062	1.0014	0.327536	0.940355
	ENSMUSG00000015337.6	Endog	0.130281	4.04186	1.22812	0.279394	0.922466
	ENSMUSG00000103847.2	Gm20056	0.13001	1.61067	0.887774	0.356017	0.944739
	ENSMUSG00000081611.2	Gm13651	0.130009	1.60244	1.26473	0.272527	0.921359
	ENSMUSG00000083139.2	Gm12418	0.12992	0.463153	0.706277	0.409461	0.952957
	ENSMUSG00000040424.16	Hipk4	0.129916	0.966989	0.748848	0.395909	0.950294
	ENSMUSG00000100347.2	Gm7895	0.129833	2.26566	1.98591	0.172343	0.87909
	ENSMUSG00000086040.9	Wipf3	0.129789	4.73646	4.7702	0.0395703	0.737654
	ENSMUSG00000027886.8	Cfap276	0.129722	2.06408	0.767824	0.390084	0.9488
	ENSMUSG00000106547.2	B230303O12Rik	0.129708	0.643569	0.724461	0.403588	0.950351
	ENSMUSG00000021922.18	Itih4	0.129692	6.27342	1.37056	0.253877	0.914506
	ENSMUSG00000031736.13	Crnde	0.129645	3.49786	2.77811	0.109322	0.824443
	ENSMUSG00000028789.17	Azin2	0.129645	4.88205	5.45672	0.0287155	0.703772
	ENSMUSG00000105366.2	Gm43719	0.129601	3.08153	1.90053	0.181475	0.886077
	ENSMUSG00000029072.4	Tas1r3	0.129572	0.875453	1.20055	0.284718	0.9274
	ENSMUSG00000039246.9	Lyplal1	0.129561	2.01993	1.2665	0.2722	0.921143
	ENSMUSG00000028718.17	Stil	0.129146	0.669927	0.291485	0.594536	0.972677
	ENSMUSG00000031737.12	Irx5	0.129113	4.5138	3.17476	0.0881895	0.811159
	ENSMUSG00000031538.7	Plat	0.129045	5.85646	1.6586	0.210787	0.905199
	ENSMUSG00000002771.13	Grin2d	0.12904	2.59495	1.99221	0.171691	0.879052
	ENSMUSG00000041837.5	Pdcd7	0.129007	4.34537	3.52596	0.0733431	0.80107
	ENSMUSG00000039395.9	Mreg	0.128996	2.22188	0.566902	0.459243	0.958952
	ENSMUSG00000068744.13	Psrc1	0.128969	1.39825	0.429815	0.51868	0.964784
	ENSMUSG00000033985.18	Tesk2	0.128905	2.71304	3.34631	0.0805435	0.80585
	ENSMUSG00000037101.17	Ttc29	0.128857	3.94924	0.891922	0.354917	0.944739
	ENSMUSG00000086725.2	A630052C17Rik	0.128854	2.79607	2.6388	0.118109	0.842155
	ENSMUSG00000026274.12	Pask	0.128815	1.47906	0.744078	0.397393	0.950294
	ENSMUSG00000055184.5	Fam72a	0.128749	0.802389	0.817077	0.375544	0.946266
	ENSMUSG00000090877.4	Hspa1b	0.128696	6.12009	0.0290893	0.866086	0.991888
	ENSMUSG00000043889.7	Gm8399	0.128624	4.61143	3.21946	0.0861196	0.811159
	ENSMUSG00000035246.17	Pcyt1b	0.128424	2.62432	0.593215	0.449133	0.958077
	ENSMUSG00000100281.2	4930422M22Rik	0.12831	1.00897	0.499864	0.486766	0.964453
	ENSMUSG00000095742.2	ENSMUSG00000095742.2	0.128305	3.01491	0.439431	0.514083	0.964784
	ENSMUSG00000075224.11	Lrrc55	0.128264	0.865173	0.649304	0.428735	0.955112
	ENSMUSG00000038481.14	Cdk19	0.128258	6.37796	1.9943	0.171476	0.879052
	ENSMUSG00000042873.12	Lhfpl4	0.12823	2.2106	0.542104	0.469115	0.960689
	ENSMUSG00000071719.3	Nalf2	0.128177	2.69169	0.691738	0.414251	0.954393
	ENSMUSG00000034271.17	Jdp2	0.128169	4.89132	6.95361	0.0148396	0.645766
	ENSMUSG00000063704.14	Mapk15	0.128103	4.90934	1.75372	0.19861	0.8982
	ENSMUSG00000001473.8	Tubb6	0.128022	4.42665	1.44893	0.241121	0.907517
	ENSMUSG00000028631.8	Kcnq4	0.127939	3.45734	3.79379	0.0639344	0.786573
	ENSMUSG00000050097.7	Ces2b	0.127926	2.17084	0.577348	0.455185	0.958077
	ENSMUSG00000018821.4	Avpi1	0.127902	5.08247	7.01203	0.014476	0.638077
	ENSMUSG00000032899.15	Styk1	0.127882	0.399864	0.509959	0.482447	0.964453
	ENSMUSG00000121112.1	ENSMUSG00000121112.1	0.127745	1.46489	0.872095	0.360219	0.944739
	ENSMUSG00000120024.1	ENSMUSG00000120024.1	0.127724	-0.437746	0.243559	0.626396	0.97542
	ENSMUSG00000063652.11	Slc22a21	0.127549	2.22303	1.60025	0.218719	0.905199
	ENSMUSG00000074912.12	Gm14207	0.12746	2.51749	0.928542	0.345411	0.943988
	ENSMUSG00000099098.5	1110035H17Rik	0.127454	0.653377	0.698106	0.412142	0.954393
	ENSMUSG00000045075.4	Gm9796	0.12745	-0.492491	0.44044	0.513605	0.964784
	ENSMUSG00000034203.9	Chchd4	0.127406	4.03226	4.52678	0.0444735	0.751839
	ENSMUSG00000037224.16	Zfyve28	0.127355	2.07023	1.27718	0.270243	0.91959
	ENSMUSG00000034412.14	Tbc1d10a	0.127316	5.21741	6.9694	0.0147403	0.64499
	ENSMUSG00000040594.20	Ranbp17	0.126996	0.223374	0.431099	0.518061	0.964784
	ENSMUSG00000114220.2	Gm10353	0.126943	0.22347	0.495476	0.488664	0.964481
	ENSMUSG00000091462.3	Gm17084	0.126928	1.7585	1.47897	0.23645	0.907179
	ENSMUSG00000046449.16	Nexmif	0.12683	2.72739	2.37751	0.136941	0.865127
	ENSMUSG00000026622.16	Nek2	0.126817	3.95913	1.36745	0.254402	0.914506
	ENSMUSG00000024206.16	Rfx2	0.126814	4.68257	1.95492	0.175591	0.880609
	ENSMUSG00000108832.2	Gm44832	0.126763	0.240589	0.359225	0.554882	0.967409
	ENSMUSG00000053263.4	Gm12592	0.12676	1.3836	1.0537	0.315488	0.938637
	ENSMUSG00000047842.8	Diras2	0.126729	3.94916	1.3648	0.254849	0.914506
	ENSMUSG00000032036.16	Kirrel3	0.12669	0.447263	0.327687	0.572659	0.971918
	ENSMUSG00000079659.6	Tmem243	0.126662	6.2818	6.85223	0.0154948	0.65138
	ENSMUSG00000097564.3	C430014B12Rik	0.126638	0.0307326	0.60299	0.445468	0.958077
	ENSMUSG00000009210.11	Prr29	0.126612	2.48788	1.07171	0.311481	0.938625
	ENSMUSG00000120844.1	ENSMUSG00000120844.1	0.126607	0.362086	0.630333	0.435467	0.955822
	ENSMUSG00000091537.3	Tma7	0.126549	5.3874	6.93317	0.0149692	0.646778
	ENSMUSG00000118181.2	Gm53015	0.126474	2.81663	1.66694	0.209683	0.905199
	ENSMUSG00000020096.22	Tbata	0.126429	2.55567	0.308566	0.584004	0.972677
	ENSMUSG00000097405.3	D630044L22Rik	0.126428	-0.0844835	0.246828	0.624102	0.97542
	ENSMUSG00000031789.18	Cngb1	0.12639	1.31688	1.65618	0.211108	0.905199
	ENSMUSG00000114995.2	Gm49284	0.126384	2.67914	1.76853	0.196794	0.8982
	ENSMUSG00000104218.2	Gm9134	0.126079	1.00374	0.752187	0.394874	0.950294
	ENSMUSG00000034206.16	Polq	0.126058	0.211255	0.887086	0.431083	0.955231
	ENSMUSG00000023826.17	Prkn	0.126005	2.32408	2.04772	0.166079	0.874312
	ENSMUSG00000048546.9	Tob2	0.12593	6.12731	9.63623	0.00505432	0.539328
	ENSMUSG00000072676.13	Tmem254	0.125902	6.25967	2.27627	0.145182	0.866559
	ENSMUSG00000062825.16	Actg1	0.125762	10.5128	5.26749	0.0313301	0.71631
	ENSMUSG00000032231.15	Anxa2	0.125651	8.90447	2.99167	0.0972916	0.821595
	ENSMUSG00000035818.15	Plekhs1	0.125405	-0.371528	0.245447	0.625069	0.97542
	ENSMUSG00000116858.2	Gm49797	0.125353	2.8505	4.59007	0.0431359	0.751839
	ENSMUSG00000039903.19	Eva1c	0.125309	3.45114	4.88822	0.0374143	0.73228
	ENSMUSG00000054161.13	Fam83e	0.12528	3.04247	1.03754	0.319144	0.938637
	ENSMUSG00000025489.6	Ifitm5	0.125241	0.218234	0.578596	0.454704	0.958077
	ENSMUSG00000029097.12	Trmt44	0.125221	2.82553	3.4453	0.0764804	0.802467
	ENSMUSG00000041025.16	Iffo2	0.125219	5.08055	7.80062	0.0104227	0.599978
	ENSMUSG00000113491.2	Gm19221	0.125088	1.53275	0.567724	0.458921	0.958817
	ENSMUSG00000119996.1	ENSMUSG00000119996.1	0.125037	2.75786	0.77999	0.386416	0.94824
	ENSMUSG00000094437.3	Gm9830	0.125015	2.42341	1.04901	0.316544	0.938637
	ENSMUSG00000046269.18	Usp27x	0.124991	2.41843	2.31904	0.14163	0.866356
	ENSMUSG00000079710.11	Dynlt2a2	0.124989	0.129001	0.211216	0.650194	0.97542
	ENSMUSG00000027223.16	Mapk8ip1	0.124977	4.37353	5.07022	0.0343434	0.727573
	ENSMUSG00000026788.14	Zbtb43	0.124911	4.98216	6.61121	0.0171852	0.653913
	ENSMUSG00000117962.2	Gm6402	0.124771	0.0547567	0.211352	0.650089	0.97542
	ENSMUSG00000020123.7	Avpr1a	0.124749	1.26141	0.205469	0.654652	0.97542
	ENSMUSG00000009013.6	Dynll1	0.124441	7.28052	3.79404	0.0639262	0.786573
	ENSMUSG00000034177.16	Rnf43	0.124422	4.77583	4.90249	0.0371626	0.73228
	ENSMUSG00000027378.17	Nphp1	0.12439	4.52852	3.62254	0.0697784	0.796512
	ENSMUSG00000030800.11	Prss8	0.124282	6.19125	5.20135	0.032306	0.71631
	ENSMUSG00000045680.9	Tcf21	0.124247	6.65652	3.15747	0.0890053	0.811485
	ENSMUSG00000107811.2	Gm44000	0.1242	1.47273	0.420444	0.523231	0.966078
	ENSMUSG00000118653.2	Gm2296	0.124176	3.84416	2.89258	0.102671	0.824443
	ENSMUSG00000011427.17	Zfp790	0.124165	4.3962	4.4096	0.0470758	0.751839
	ENSMUSG00000046731.6	Kctd11	0.12415	5.24247	3.42559	0.0772701	0.802467
	ENSMUSG00000031217.9	Efnb1	0.124147	7.07841	3.00822	0.0964255	0.820335
	ENSMUSG00000072825.12	Cep170b	0.124146	6.74939	8.53531	0.00775106	0.587968
	ENSMUSG00000020895.15	Tmem107	0.124143	3.83322	1.91732	0.179634	0.884272
	ENSMUSG00000045464.7	2810002D19Rik	0.124128	2.75887	2.65197	0.117244	0.841331
	ENSMUSG00000084862.2	Gm16278	0.123952	1.35234	0.596331	0.447959	0.958077
	ENSMUSG00000035606.9	Ky	0.123934	3.01413	0.374695	0.546548	0.967409
	ENSMUSG00000005131.5	4930550C14Rik	0.123928	1.30274	0.838075	0.369586	0.945054
	ENSMUSG00000030882.20	Dnhd1	0.12382	3.21868	3.42697	0.0772145	0.802467
	ENSMUSG00000042320.18	Prox2	0.123814	2.42863	1.75923	0.197932	0.8982
	ENSMUSG00000006219.13	Fblim1	0.123787	6.2612	3.51005	0.0739498	0.80107
	ENSMUSG00000037716.16	Ccdc33	0.123755	3.82608	0.431286	0.517972	0.964784
	ENSMUSG00000121227.1	ENSMUSG00000121227.1	0.123612	2.15386	0.28623	0.597857	0.972677
	ENSMUSG00000037211.13	Spry1	0.123604	6.93137	4.9973	0.0355384	0.72769
	ENSMUSG00000106715.4	Tmem265	0.123506	2.15239	0.872842	0.360017	0.944739
	ENSMUSG00000108368.2	Gm45053	0.123459	0.2304	0.413577	0.526613	0.966777
	ENSMUSG00000050490.8	Psma5-ps	0.123409	2.87261	2.89726	0.102409	0.824443
	ENSMUSG00000084159.2	Gm12696	0.123407	3.55918	2.28524	0.144429	0.866356
	ENSMUSG00000082433.3	ENSMUSG00000082433.3	0.123387	1.72389	0.0348465	0.853579	0.99101
	ENSMUSG00000106927.2	Gm43598	0.123301	-0.36849	0.778029	0.441764	0.958077
	ENSMUSG00000038248.9	Sobp	0.123228	1.70817	0.732093	0.401161	0.950294
	ENSMUSG00000083097.4	Gm14494	0.123221	3.05448	2.27449	0.145333	0.866559
	ENSMUSG00000085779.2	Atcayos	0.123051	0.410593	0.105818	0.74794	0.983607
	ENSMUSG00000061684.7	Rpl21-ps8	0.122998	0.653897	0.343647	0.563525	0.969515
	ENSMUSG00000026034.18	Clk1	0.122894	7.7065	4.66807	0.0415492	0.744185
	ENSMUSG00000040265.17	Dnm3	0.122868	4.14198	2.74774	0.111171	0.828877
	ENSMUSG00000028717.13	Tal1	0.122795	4.81812	3.97196	0.0584387	0.775053
	ENSMUSG00000082896.2	Gm5844	0.122776	3.11573	1.44119	0.242344	0.907517
	ENSMUSG00000102813.2	Gm37795	0.122773	2.89602	1.10353	0.304566	0.937886
	ENSMUSG00000041986.17	Elmod1	0.122567	3.05971	0.770003	0.389423	0.948569
	ENSMUSG00000074030.4	Exoc8	0.122567	4.94072	11.5797	0.00247752	0.466173
	ENSMUSG00000020840.11	Blmh	0.122534	5.52845	2.17718	0.153829	0.873263
	ENSMUSG00000051502.8	Ufsp1	0.122499	1.78441	1.12083	0.300892	0.935339
	ENSMUSG00000037143.18	Cfap61	0.122427	3.28318	1.01411	0.32455	0.939376
	ENSMUSG00000038205.13	Prkab2	0.122346	4.69601	2.37382	0.137232	0.865127
	ENSMUSG00000026259.15	Ngef	0.122203	4.30187	2.82939	0.106282	0.824443
	ENSMUSG00000086320.2	Gm12840	0.122185	0.784688	0.379592	0.54396	0.967409
	ENSMUSG00000044734.17	Serpinb1a	0.122155	4.87066	0.841677	0.368578	0.944759
	ENSMUSG00000028532.15	Cachd1	0.122129	4.89504	8.09649	0.00924068	0.598575
	ENSMUSG00000039754.11	Alkbh4	0.122098	3.09627	2.15204	0.15612	0.873263
	ENSMUSG00000045252.12	Zfp574	0.122018	5.10953	6.25271	0.0200913	0.659775
	ENSMUSG00000082100.2	Glns-ps1	0.121979	1.82543	1.05838	0.314439	0.938629
	ENSMUSG00000046826.8	Fam187b	0.12188	2.46085	2.63786	0.118171	0.842155
	ENSMUSG00000084939.4	Gm830	0.121761	2.7904	1.54677	0.226323	0.905199
	ENSMUSG00000044279.16	Crb3	0.121716	4.6409	3.64552	0.0689599	0.796512
	ENSMUSG00000020894.17	Vamp2	0.121696	7.68788	12.0766	0.00208067	0.43597
	ENSMUSG00000086765.9	Gm11827	0.121602	-0.253626	0.401121	0.53285	0.967047
	ENSMUSG00000026301.17	Iqca	0.121542	4.12741	0.70034	0.411407	0.954253
	ENSMUSG00000022621.17	Rabl2	0.121539	4.52719	1.7075	0.204414	0.905199
	ENSMUSG00000073985.3	Gm10602	0.121477	2.04118	1.09331	0.306762	0.938487
	ENSMUSG00000049515.13	Espnl	0.121437	0.840786	0.180612	0.674856	0.97542
	ENSMUSG00000029452.19	Tmem116	0.121428	3.59825	2.02713	0.168134	0.876216
	ENSMUSG00000005251.16	Ripk4	0.121339	4.93963	3.71278	0.0666261	0.793612
	ENSMUSG00000063714.17	Sp3os	0.121319	2.54208	2.56994	0.122758	0.845392
	ENSMUSG00000039384.9	Dusp10	0.121307	3.23391	2.52132	0.12617	0.849473
	ENSMUSG00000040734.15	Ppp1r13l	0.121303	3.17269	1.17093	0.29059	0.931045
	ENSMUSG00000046886.7	Zfp474	0.121272	3.67248	0.919124	0.347821	0.944722
	ENSMUSG00000021643.16	Serf1	0.121254	1.87102	1.23779	0.27756	0.922466
	ENSMUSG00000116720.2	Gm31641	0.121229	1.23807	0.596365	0.447947	0.958077
	ENSMUSG00000028024.15	Enpep	0.121191	7.65	7.65258	0.011076	0.607583
	ENSMUSG00000071052.5	Rpl7a-ps5	0.121096	0.184273	0.243777	0.626242	0.97542
	ENSMUSG00000120675.1	ENSMUSG00000120675.1	0.12108	0.3048	0.651408	0.427999	0.955112
	ENSMUSG00000074340.10	Ovgp1	0.121031	1.51643	0.603037	0.445451	0.958077
	ENSMUSG00000074220.11	Zfp382	0.120925	0.51752	0.337409	0.567061	0.970314
	ENSMUSG00000101320.2	Gm28529	0.120913	0.958375	0.440365	0.513641	0.964784
	ENSMUSG00000027166.15	Dnajc24	0.120907	2.79265	2.12281	0.158836	0.873263
	ENSMUSG00000108181.2	C030015A19Rik	0.120794	1.59154	0.923358	0.346735	0.944294
	ENSMUSG00000031253.16	Srpx2	0.120752	3.63914	1.92117	0.179215	0.884272
	ENSMUSG00000026933.18	Camsap1	0.120751	5.19391	5.16948	0.0327884	0.71631
	ENSMUSG00000024768.6	Lipf	0.120741	-0.484981	0.180415	0.675022	0.97542
	ENSMUSG00000079434.9	Neu2	0.120694	1.36985	0.370052	0.549024	0.967409
	ENSMUSG00000114432.2	Gm49391	0.120665	3.02446	0.535184	0.471932	0.961126
	ENSMUSG00000030888.15	Rrp8	0.120643	4.44092	5.9955	0.022513	0.666643
	ENSMUSG00000110615.2	Gm45890	0.120498	-0.0786464	0.403952	0.531421	0.966777
	ENSMUSG00000120210.1	ENSMUSG00000120210.1	0.120459	1.60646	0.869509	0.360919	0.944739
	ENSMUSG00000032300.8	1700017B05Rik	0.120443	4.82653	6.83048	0.0156395	0.65138
	ENSMUSG00000028890.14	Mtf1	0.120417	5.01412	7.71572	0.010792	0.599978
	ENSMUSG00000030030.6	1700003E16Rik	0.12029	3.41907	1.32188	0.262244	0.914993
	ENSMUSG00000095730.4	Vmn2r29	0.120175	0.121061	0.278218	0.602997	0.973508
	ENSMUSG00000046550.9	Spin2c	0.120129	0.148009	0.437546	0.514978	0.964784
	ENSMUSG00000001288.16	Rarg	0.120033	6.67754	3.41561	0.0776737	0.802467
	ENSMUSG00000029999.15	Tgfa	0.119976	5.03613	5.17536	0.0326988	0.71631
	ENSMUSG00000083240.4	Gm13453	0.119898	2.88548	1.49296	0.234314	0.907179
	ENSMUSG00000097960.2	A330074K22Rik	0.119864	0.097378	0.227896	0.63766	0.97542
	ENSMUSG00000052302.7	Tbc1d30	0.119862	5.72078	3.66668	0.0682156	0.795822
	ENSMUSG00000032121.10	Tmem218	0.119853	3.04704	2.44307	0.131901	0.858683
	ENSMUSG00000037971.11	1110032A03Rik	0.119841	5.26571	4.26112	0.0506237	0.759881
	ENSMUSG00000053166.15	Cdh22	0.119694	1.36318	0.622443	0.438316	0.957207
	ENSMUSG00000038302.15	Afg1l	0.119605	4.24245	5.44999	0.0288041	0.704094
	ENSMUSG00000064125.15	Prr36	0.119584	2.52598	2.31062	0.142322	0.866356
	ENSMUSG00000082016.4	Pgam1-ps2	0.119561	3.9033	1.84137	0.188152	0.894128
	ENSMUSG00000033952.15	Aspm	0.11956	1.24503	0.21401	0.648053	0.97542
	ENSMUSG00000097504.2	4930516B21Rik	0.119515	2.73389	1.55681	0.224871	0.905199
	ENSMUSG00000087440.3	4930577N17Rik	0.119494	0.379779	0.735643	0.400039	0.950294
	ENSMUSG00000022615.8	Tymp	0.119487	3.82594	0.776167	0.387563	0.948261
	ENSMUSG00000082321.4	Gm14253	0.11948	2.52264	2.2809	0.144793	0.866356
	ENSMUSG00000037214.13	Thap1	0.119451	2.84527	3.81609	0.0632151	0.785654
	ENSMUSG00000028841.15	Cnksr1	0.119433	4.2715	4.49924	0.0450703	0.751839
	ENSMUSG00000031023.6	Akip1	0.119354	4.31157	5.0221	0.0351268	0.72769
	ENSMUSG00000004892.14	Bcan	0.119339	3.25762	0.934083	0.344005	0.943144
	ENSMUSG00000044201.11	Cdc25c	0.119291	-0.496743	0.114413	0.738288	0.982008
	ENSMUSG00000086915.9	ENSMUSG00000086915.9	0.1192	1.27219	0.701532	0.411015	0.953818
	ENSMUSG00000028247.3	Coq3	0.119194	3.30311	1.95167	0.175936	0.880609
	ENSMUSG00000084989.4	Crocc2	0.119112	3.98202	0.677537	0.419013	0.954747
	ENSMUSG00000025813.15	Homer2	0.119078	2.15282	1.08274	0.309058	0.938487
	ENSMUSG00000090121.11	Abhd12b	0.11906	0.832702	0.294986	0.592345	0.972677
	ENSMUSG00000036598.5	Ccdc113	0.119057	3.75338	0.984224	0.331632	0.941249
	ENSMUSG00000108353.2	Gm45205	0.119055	-0.200326	0.426218	0.520418	0.964784
	ENSMUSG00000036962.13	Cfap221	0.118941	2.04968	0.467958	0.500863	0.964784
	ENSMUSG00000026315.14	Serpinb8	0.118748	3.8064	1.60918	0.217482	0.905199
	ENSMUSG00000034501.8	Pcnx4	0.118707	4.24835	5.19404	0.032416	0.71631
	ENSMUSG00000074818.14	Pdzd7	0.118685	1.65623	0.716531	0.406133	0.951598
	ENSMUSG00000107096.4	Gm43597	0.118605	2.82061	1.84017	0.18829	0.894132
	ENSMUSG00000041809.6	Efhc1	0.118594	4.21335	1.29809	0.266461	0.918375
	ENSMUSG00000090659.10	Zfp493	0.118583	1.21888	0.625701	0.437136	0.956531
	ENSMUSG00000075225.16	Ccdc162	0.118577	4.72814	0.973429	0.334243	0.942208
	ENSMUSG00000039835.17	Nhsl1	0.118552	4.67548	2.86774	0.104073	0.824443
	ENSMUSG00000026576.13	Atp1b1	0.11835	8.03518	3.66014	0.0684446	0.795822
	ENSMUSG00000111329.2	A830035O19Rik	0.118315	0.846305	0.847769	0.366881	0.944739
	ENSMUSG00000043903.5	Zfp469	0.118287	2.7648	0.766406	0.390515	0.9488
	ENSMUSG00000096916.8	Zfp850	0.118275	1.66946	0.595942	0.448106	0.958077
	ENSMUSG00000030711.17	Sult1a1	0.118265	5.78498	1.13297	0.298351	0.934344
	ENSMUSG00000056752.17	Dnah9	0.118117	4.95547	1.208	0.283266	0.92646
	ENSMUSG00000112532.2	Gm36283	0.118003	2.76551	2.87568	0.103622	0.824443
	ENSMUSG00000103567.2	Pcdhga5	0.117904	3.71826	1.03019	0.320827	0.938637
	ENSMUSG00000015843.11	Rxrg	0.11786	0.818131	0.358679	0.55518	0.967409
	ENSMUSG00000024118.15	Tedc2	0.117855	3.43317	3.40717	0.0780168	0.802467
	ENSMUSG00000040557.15	Mettl27	0.117797	4.10744	2.55066	0.124098	0.848942
	ENSMUSG00000118662.2	Tctn2	0.117745	4.15232	5.05475	0.034593	0.72769
	ENSMUSG00000032012.10	Nectin1	0.117527	5.36675	2.46915	0.129957	0.854257
	ENSMUSG00000041189.10	Chrnb1	0.117485	4.9918	2.09426	0.161544	0.873352
	ENSMUSG00000078816.11	Prkcg	0.117411	3.11143	1.7172	0.203179	0.905199
	ENSMUSG00000045140.9	Pigw	0.117361	2.15664	1.26085	0.273244	0.921763
	ENSMUSG00000043020.14	Dnai3	0.117272	4.14329	0.815185	0.376088	0.946475
	ENSMUSG00000115518.2	Gm10791	0.117224	-0.243011	0.600317	0.506402	0.964784
	ENSMUSG00000031169.14	Porcn	0.117222	5.03979	1.88362	0.183354	0.887553
	ENSMUSG00000090622.2	A930033H14Rik	0.117112	1.66062	0.70356	0.41035	0.953223
	ENSMUSG00000026725.18	Tnn	0.117088	2.96122	0.958565	0.337884	0.943144
	ENSMUSG00000091985.2	Gm17354	0.117086	2.39829	2.72049	0.112861	0.83227
	ENSMUSG00000044772.3	Sntn	0.117019	3.52751	0.536299	0.471476	0.961126
	ENSMUSG00000082675.2	Gm6382	0.117017	1.03005	0.920507	0.347466	0.944294
	ENSMUSG00000103593.2	Gm37352	0.116894	1.04022	0.248162	0.623172	0.97542
	ENSMUSG00000030685.6	Kctd13	0.116894	3.80636	3.63201	0.0694399	0.796512
	ENSMUSG00000074480.5	Mex3a	0.116849	1.52605	0.748683	0.39596	0.950294
	ENSMUSG00000047787.9	Flrt1	0.116701	0.322771	0.264989	0.611697	0.974805
	ENSMUSG00000049112.10	Oxtr	0.11669	-0.33956	0.0197547	0.889466	0.993901
	ENSMUSG00000091050.3	9330020H09Rik	0.116639	0.0398187	0.278838	0.602596	0.973312
	ENSMUSG00000039543.17	Cfap70	0.116598	3.70704	1.04285	0.317936	0.938637
	ENSMUSG00000074277.5	Phldb3	0.11658	2.45715	0.909718	0.350252	0.944722
	ENSMUSG00000051397.6	Tacstd2	0.116527	5.91029	1.13688	0.29754	0.933945
	ENSMUSG00000083465.2	Gm11652	0.11649	-0.119872	0.473228	0.498487	0.964784
	ENSMUSG00000060240.13	Cend1	0.11647	-0.401972	0.252404	0.620234	0.974805
	ENSMUSG00000021903.12	Galnt15	0.116375	5.99844	0.882352	0.357462	0.944739
	ENSMUSG00000094786.2	Gm14403	0.116289	2.70125	1.05293	0.315662	0.938637
	ENSMUSG00000042757.17	Tmem108	0.116278	2.56625	1.52231	0.229913	0.906553
	ENSMUSG00000022676.8	Snai2	0.11619	3.34586	1.13688	0.297539	0.933945
	ENSMUSG00000042567.21	Nek10	0.116036	2.32759	0.57633	0.455578	0.958077
	ENSMUSG00000038987.9	Cfap157	0.116008	3.19263	1.04451	0.31756	0.938637
	ENSMUSG00000049130.7	C5ar1	0.115959	3.86755	1.52557	0.22943	0.906553
	ENSMUSG00000026208.10	Des	0.115946	6.97178	0.910614	0.350019	0.944722
	ENSMUSG00000121230.1	ENSMUSG00000121230.1	0.115873	0.408289	0.432747	0.51727	0.964784
	ENSMUSG00000044149.8	Nkrf	0.115797	2.95243	2.06548	0.16433	0.873901
	ENSMUSG00000030159.16	Clec1b	0.115796	3.63417	0.725774	0.403169	0.950351
	ENSMUSG00000036825.13	Ssx2ip	0.115782	4.80963	5.31059	0.030712	0.71631
	ENSMUSG00000060470.8	Adgrg3	0.115698	3.55232	3.42561	0.0772696	0.802467
	ENSMUSG00000039099.8	Wdr93	0.115692	2.16472	0.613475	0.44159	0.958077
	ENSMUSG00000075040.10	Zfp408	0.115456	4.50595	7.61762	0.0112369	0.613243
	ENSMUSG00000031970.18	Dbndd1	0.115437	1.71499	1.6684	0.20949	0.905199
	ENSMUSG00000087013.9	2610027K06Rik	0.115395	2.53472	1.3898	0.250668	0.913858
	ENSMUSG00000097075.4	Cdiptos	0.115328	2.41466	0.725829	0.403151	0.950351
	ENSMUSG00000028494.13	Plin2	0.115278	7.07915	1.82631	0.1899	0.894277
	ENSMUSG00000028889.18	Yrdc	0.115243	4.08116	5.80414	0.0245261	0.680761
	ENSMUSG00000024247.15	Pkdcc	0.115235	3.12375	1.75433	0.198535	0.8982
	ENSMUSG00000085227.3	6330418K02Rik	0.115093	1.85051	0.664293	0.423531	0.955112
	ENSMUSG00000054206.3	Gzmm	0.115072	0.32412	0.861211	0.363178	0.944739
	ENSMUSG00000060647.3	Gm7099	0.115059	-0.00881502	0.405437	0.530674	0.966777
	ENSMUSG00000037921.16	Ddx60	0.115026	3.32338	1.16065	0.292664	0.932011
	ENSMUSG00000037784.15	Dzip1l	0.115019	5.05705	4.47566	0.0455883	0.751839
	ENSMUSG00000108878.2	Gm49493	0.114958	0.468859	0.528791	0.474561	0.962375
	ENSMUSG00000078773.12	Rad54b	0.114909	0.118906	0.229545	0.636452	0.97542
	ENSMUSG00000113786.2	Gm49384	0.1149	0.511226	0.345976	0.562216	0.968519
	ENSMUSG00000028948.17	Nol9	0.11486	4.95387	8.01736	0.00954156	0.599509
	ENSMUSG00000069939.9	Gm12070	0.114793	0.207347	0.0597273	0.809126	0.988122
	ENSMUSG00000120949.1	ENSMUSG00000120949.1	0.114787	1.74202	0.171364	0.682794	0.977286
	ENSMUSG00000032625.15	Thsd7a	0.114755	1.52823	0.579516	0.454351	0.958077
	ENSMUSG00000105868.2	Gm43766	0.11467	0.441474	0.334459	0.568748	0.971032
	ENSMUSG00000052137.12	Rbm12b2	0.114646	4.65025	1.56878	0.223154	0.905199
	ENSMUSG00000103898.2	Gm30238	0.114627	1.47105	0.356418	0.55642	0.967409
	ENSMUSG00000019880.11	Rspo3	0.114616	1.64352	0.690058	0.41481	0.954393
	ENSMUSG00000025481.13	Urah	0.114614	2.3878	0.967917	0.335587	0.942945
	ENSMUSG00000037890.14	Wdr19	0.114565	4.8832	3.18507	0.0877067	0.811159
	ENSMUSG00000055494.6	Gm14168	0.114477	0.303165	0.480821	0.495096	0.964784
	ENSMUSG00000120952.1	ENSMUSG00000120952.1	0.114432	0.355497	0.551265	0.465427	0.960351
	ENSMUSG00000002064.11	Sdf2	0.114397	5.41254	6.28411	0.0198161	0.659775
	ENSMUSG00000039382.13	Wdr45	0.114362	6.2205	2.88074	0.103336	0.824443
	ENSMUSG00000033762.9	Recql4	0.114262	1.0542	0.735256	0.400161	0.950294
	ENSMUSG00000062760.12	Shisal1	0.114151	3.18188	0.593701	0.44895	0.958077
	ENSMUSG00000121491.1	ENSMUSG00000121491.1	0.114126	0.477624	0.490636	0.490772	0.964784
	ENSMUSG00000044949.5	Ubtd2	0.114092	2.72285	1.38824	0.250926	0.913858
	ENSMUSG00000004891.17	Nes	0.114046	7.68738	3.50728	0.074056	0.80107
	ENSMUSG00000039963.21	Ccdc40	0.114004	5.22206	1.09514	0.306369	0.938487
	ENSMUSG00000099927.2	Gm8226	0.113916	6.44784	3.10968	0.0913069	0.815792
	ENSMUSG00000051255.7	Gm6563	0.113769	3.78347	2.53531	0.125177	0.849467
	ENSMUSG00000029165.18	Agbl5	0.113754	4.78591	2.6946	0.114494	0.836893
	ENSMUSG00000023341.17	Mx2	0.113721	2.17451	1.19464	0.285876	0.927901
	ENSMUSG00000084844.5	Hoxb3os	0.113708	2.00432	0.59015	0.450292	0.958077
	ENSMUSG00000037196.7	Pacrg	0.113675	2.86914	1.23074	0.278895	0.922466
	ENSMUSG00000026638.16	Irf6	0.113656	4.98918	4.41326	0.0469919	0.751839
	ENSMUSG00000041000.9	Trim62	0.113648	4.95177	6.3282	0.0194366	0.659775
	ENSMUSG00000087119.5	Atg4a-ps	0.113512	2.26038	1.58754	0.220498	0.905199
	ENSMUSG00000038722.18	Bud31	0.113447	5.00893	6.07251	0.0217554	0.664395
	ENSMUSG00000086245.2	Gm16170	0.113365	1.13942	0.465717	0.50188	0.964784
	ENSMUSG00000101014.2	Gm28289	0.113324	0.0362177	0.18643	0.669984	0.97542
	ENSMUSG00000024130.17	Abca3	0.113311	9.47342	5.92151	0.0232688	0.675704
	ENSMUSG00000023764.19	Sfi1	0.113277	5.66878	3.30856	0.0821581	0.807978
	ENSMUSG00000107335.2	Gm43372	0.113268	-0.388184	0.304701	0.586352	0.972677
	ENSMUSG00000120002.1	ENSMUSG00000120002.1	0.113211	0.905645	0.463992	0.502665	0.964784
	ENSMUSG00000060639.6	H4c9	0.113194	-0.0243852	0.461543	0.503783	0.964784
	ENSMUSG00000055833.15	1700034H15Rik	0.113169	0.834844	0.529968	0.474075	0.961836
	ENSMUSG00000035694.16	Caps2	0.113116	0.950414	0.574772	0.45618	0.9585
	ENSMUSG00000050075.9	Gpr171	0.113045	1.96483	0.614295	0.44129	0.958077
	ENSMUSG00000029049.15	Morn1	0.113028	2.99249	1.05013	0.31629	0.938637
	ENSMUSG00000026605.15	Cenpf	0.113023	1.79597	0.119532	0.732731	0.981701
[truncated: 15,500 more rows]

## Sheet: c DEGs +MP vs PBS day 6
	Ensembl_ID	HUGO_ID	logFC	logCPM	F	PValue	FDR	M1_MP	M2_MP	M3_MP	M4_MP	M5_MP	M6_MP	M1_PBS	M2_PBS	M3_PBS	M4_PBS	M5_PBS
+MP vs. PBS at day 6. DEGs (EdgeR, FDR<0.05) from lungs of C57BL/6J mice.	ENSMUSG00000003032.9	Klf4	0.708079	7.24201	50.2333	3.4917e-07	0.00305506	160.883	171.627	145.89	193.424	157.991	159.449	93.3327	93.2126	107.878	104.48	105.681
	ENSMUSG00000020893.18	Per1	1.15911	6.57187	60.1508	8.03634e-08	0.00140628	96.6944	121.566	83.1175	93.4547	125.219	125.273	49.663	33.8873	44.4829	52.3533	60.2302
	ENSMUSG00000039220.17	Ppp1r10	0.31676	5.9691	37.4208	3.26455e-06	0.00816092	64.6141	74.093	72.9449	69.8994	69.7078	69.8006	59.0116	52.4151	59.0103	59.5523	51.6335
	ENSMUSG00000042510.8	AA986860	0.411687	6.36586	47.5636	5.37039e-07	0.00313255	100.577	88.6848	84.4869	103.035	81.0891	95.92	73.3035	72.2104	68.4662	64.358	68.6412
	ENSMUSG00000055148.8	Klf2	0.664594	7.36282	39.1792	2.33662e-06	0.00681476	183.64	220.332	170.441	190.809	167.472	175.198	107.522	91.0098	121.765	122.082	139.936
	ENSMUSG00000060969.10	Irx1	0.619358	5.9605	42.0792	1.37445e-06	0.00514616	58.096	78.7269	66.4891	76.301	69.4912	72.8948	43.4135	39.5301	44.8858	50.2803	50.7048
	ENSMUSG00000089809.10	Rasgef1b	0.424373	5.2714	41.7028	1.47041e-06	0.00514616	37.5782	40.7191	37.8052	51.7314	45.3329	44.2386	32.5281	32.3181	32.1831	31.9811	30.8846

## Sheet: d MSigDB
	NAME	NES	NOM.p.val	FDR.q.val
log2 fold-change ranked gene lists from lungs of mice given microplastic vs. PBS at 6 days were used in Gene Set Enrichment Analysis to test for enrichment of 45,576 gene sets from the Molecular Signatures Database v2023.	MM_GOBP_SKIN_DEVELOPMENT	2.5256	0	0
	HS_BUSSLINGER_ESOPHAGEAL_LATE_SUPRABASAL_CELLS	2.51568	0	0
	MM_GOBP_EPIDERMIS_DEVELOPMENT	2.50886	0	0
	HS_GOBP_SKIN_DEVELOPMENT	2.50404	0	0
	HS_REACTOME_FORMATION_OF_THE_CORNIFIED_ENVELOPE	2.48247	0	0
	MM_GOCC_INTERMEDIATE_FILAMENT_CYTOSKELETON	2.47625	0	0
	MM_GOBP_KERATINOCYTE_DIFFERENTIATION	2.45326	0	0
	MM_HOLLERN_SQUAMOUS_BREAST_TUMOR	2.4519	0	0
	MM_GOCC_INTERMEDIATE_FILAMENT	2.44883	0	0
	MM_GOBP_INTERMEDIATE_FILAMENT_BASED_PROCESS	2.44547	0	0
	HS_GOBP_KERATINOCYTE_DIFFERENTIATION	2.43077	0	0
	MM_GOBP_EPIDERMAL_CELL_DIFFERENTIATION	2.42894	0	0
	HS_DESCARTES_FETAL_LUNG_SQUAMOUS_EPITHELIAL_CELLS	2.427	0	0
	HS_GOCC_INTERMEDIATE_FILAMENT_CYTOSKELETON	2.42172	0	0
	HS_GOBP_EPIDERMIS_DEVELOPMENT	2.41869	0	0
	HS_GOBP_INTERMEDIATE_FILAMENT_BASED_PROCESS	2.41836	0	0
	HS_HOLLERN_SQUAMOUS_BREAST_TUMOR	2.41588	0	0
	MM_GOMF_STRUCTURAL_MOLECULE_ACTIVITY	2.40102	0	0
	MM_REACTOME_DEVELOPMENTAL_BIOLOGY	2.39848	0	0
	HS_GOCC_INTERMEDIATE_FILAMENT	2.38898	0	0
	MM_REACTOME_FORMATION_OF_THE_CORNIFIED_ENVELOPE	2.38857	0	0
	HS_DESCARTES_MAIN_FETAL_SKELETAL_MUSCLE_CELLS	2.38056	0	0
	MM_REACTOME_KERATINIZATION	2.37849	0	0
	HS_GOBP_EPIDERMAL_CELL_DIFFERENTIATION	2.37738	0	0
	HS_HE_LIM_SUN_FETAL_LUNG_C1_PROXIMAL_BASAL_CELL	2.3488	0	0
	HS_REACTOME_KERATINIZATION	2.34772	0	0
	HS_HE_LIM_SUN_FETAL_LUNG_C1_SQUAMOUS_CELL	2.34761	0	0
	HS_LIN_SILENCED_BY_TUMOR_MICROENVIRONMENT	2.3457	0	0
	HS_BLANCO_MELO_BETA_INTERFERON_TREATED_BRONCHIAL_EPITHELIAL_CELLS_DN	2.34026	0	0
	HS_MODULE_438	2.33538	0	0.000146454
	HS_CROMER_TUMORIGENESIS_DN	2.32477	0	0.000138746
	HS_HE_LIM_SUN_FETAL_LUNG_C1_PROXIMAL_SECRETORY_2_CELL	2.323	0	0.000131808
	HS_DESCARTES_MAIN_FETAL_SQUAMOUS_EPITHELIAL_CELLS	2.31643	0	0.000292616
	MM_GOBP_KERATINIZATION	2.30271	0	0.000935778
	HS_GOBP_INTERMEDIATE_FILAMENT_ORGANIZATION	2.29297	0	0.000956541
	MM_GOCC_CORNIFIED_ENVELOPE	2.28501	0	0.0013671
	HS_RICKMAN_TUMOR_DIFFERENTIATED_WELL_VS_MODERATELY_UP	2.28404	0	0.00125741
	HS_BOSCO_EPITHELIAL_DIFFERENTIATION_MODULE	2.28147	0	0.00127777
	HS_JAEGER_METASTASIS_DN	2.27894	0	0.0012615
	MM_GOBP_INTERMEDIATE_FILAMENT_ORGANIZATION	2.27543	0	0.00150814
	HS_DESCARTES_FETAL_EYE_CORNEAL_AND_CONJUNCTIVAL_EPITHELIAL_CELLS	2.27161	0	0.00165019
	HS_GOBP_KERATINIZATION	2.26909	0	0.00165419
	HS_DESCARTES_FETAL_STOMACH_SQUAMOUS_EPITHELIAL_CELLS	2.26895	0	0.00159511
	HS_HE_LIM_SUN_FETAL_LUNG_C1_MID_BASAL_CELL	2.26255	0	0.00199318
	HS_HP_ABNORMAL_EPIDERMAL_MORPHOLOGY	2.26215	0	0.00192674
	HS_HP_ABNORMALITY_OF_SKIN_ADNEXA_PHYSIOLOGY	2.2543	0	0.00259984
	HS_GSE27092_WT_VS_HDAC7_PHOSPHO_DEFICIENT_CD8_TCELL_UP	2.24804	0	0.00287455
	HS_HP_PARAKERATOSIS	2.24716	0	0.00286745
	MM_TABULA_MURIS_SENIS_TONGUE_KERATINOCYTE_AGEING	2.24217	0	0.0045165
	MM_GOCC_KERATIN_FILAMENT	2.23478	0	0.00563233
	HS_DESCARTES_FETAL_KIDNEY_URETERIC_BUD_CELLS	2.23368	0	0.00448062
	HS_GOMF_STRUCTURAL_MOLECULE_ACTIVITY	2.23315	0	0.00445263
	MM_GOBP_EPITHELIAL_CELL_DIFFERENTIATION	2.22594	0	0.00700621
	HS_DURANTE_ADULT_OLFACTORY_NEUROEPITHELIUM_RESPIRATORY_HORIZONTAL_BASAL_CELLS	2.2115	0	0.00917207
	HS_GOCC_CORNIFIED_ENVELOPE	2.21041	0	0.00913835
	HS_BUSSLINGER_ESOPHAGEAL_PROLIFERATING_BASAL_CELLS	2.20927	0	0.00933566
	HS_HP_EPIDERMAL_ACANTHOSIS	2.20575	0	0.010241
	HS_HP_DRY_SKIN	2.20352	0	0.0105098
	HS_GNF2_TTN	2.19732	0	0.0125602
	HS_MODULE_153	2.19247	0	0.0139092
	HS_RICKMAN_TUMOR_DIFFERENTIATED_WELL_VS_MODERATELY_DN	2.19198	0	0.0138095
	MM_GOBP_PEPTIDE_CROSS_LINKING	2.18695	0	0.0205451
	HS_HALLMARK_KRAS_SIGNALING_DN	2.18453	0	0.016283
	HS_HP_HEAT_INTOLERANCE	2.18384	0	0.0161352
	HS_MODULE_357	2.18098	0	0.0169085
	HS_HP_CONGENITAL_NONBULLOUS_ICHTHYOSIFORM_ERYTHRODERMA	2.17901	0	0.0174636
	MM_DESCARTES_ORGANOGENESIS_EPITHELIAL_CELLS	2.17739	0	0.0246529
	MM_HALLMARK_KRAS_SIGNALING_DN	2.16727	0	0.0321032
	HS_HP_ABNORMAL_EPIGLOTTIS_MORPHOLOGY	2.16539	0	0.0246012
	HS_GSE18281_PERIMEDULLARY_CORTICAL_REGION_VS_WHOLE_CORTEX_THYMUS_UP	2.16444	0	0.0248144
	HS_GOBP_REGULATION_OF_TRANSLATION_IN_RESPONSE_TO_STRESS	2.16422	0	0.0244058
	HS_HP_ERYTHRODERMA	2.16306	0	0.0247338
	HS_PID_DELTA_NP63_PATHWAY	2.16254	0	0.0245779
	HS_HP_HYPOHIDROSIS	2.15618	0	0.0282954
	HS_GOCC_KERATIN_FILAMENT	2.15272	0	0.0301383
	HS_HP_OVERLAPPING_FINGERS	2.14954	0	0.0320577
	HS_GNF2_SERPINB5	2.14893	0	0.0319227
	HS_HP_ONYCHOGRYPOSIS	2.14838	0	0.0317929
	HS_MODULE_297	2.14683	0	0.0324831
	HS_HP_CONGENITAL_ICHTHYOSIFORM_ERYTHRODERMA	2.14349	0	0.0345745
	HS_HP_ALOPECIA	2.13917	0	0.0380688
	HS_HP_DISTAL_LOWER_LIMB_AMYOTROPHY	2.13673	0.00212766	0.0401858
	HS_HP_HYPERKERATOSIS	2.13411	0	0.0420513
	HS_MURAKAMI_UV_RESPONSE_6HR_DN	2.13399	0	0.0415092
	HS_MACLACHLAN_BRCA1_TARGETS_DN	2.13381	0	0.0410113
	HS_CROMER_METASTASIS_DN	2.13374	0	0.0403939
	HS_HP_ICHTHYOSIS	2.1322	0	0.0412276
	HS_HP_ATROPHIC_SCARS	2.13196	0.00425532	0.0407693
	HS_EBAUER_MYOGENIC_TARGETS_OF_PAX3_FOXO1_FUSION	2.13008	0	0.0419077
	HS_ODONNELL_METASTASIS_DN	2.12868	0	0.042646
	HS_ZNF488_TARGET_GENES	2.12809	0.002079	0.0427499
	HS_HP_APLASIA_CUTIS_CONGENITA	2.12778	0	0.0423697
	HS_HU_GENOTOXIN_ACTION_DIRECT_VS_INDIRECT_24HR	2.12678	0	0.0427545
	HS_HP_METATARSUS_ADDUCTUS	2.12532	0.0043384	0.0436438
	HS_HP_SQUAMOUS_CELL_CARCINOMA	2.12229	0	0.0458224
	HS_HP_ORAL_LEUKOPLAKIA	2.12178	0	0.0457017
	HS_PROVENZANI_METASTASIS_DN	2.11933	0	0.0478195
	HS_HP_PRURITUS	2.11702	0	0.0497115
	HS_HP_SQUAMOUS_CELL_CARCINOMA_OF_THE_SKIN	2.11672	0.0021645	0.0495686
	HS_TURASHVILI_BREAST_LOBULAR_CARCINOMA_VS_LOBULAR_NORMAL_UP	2.11637	0	0.0493068
	MM_REACTOME_PD_1_SIGNALING	-1.97811	0.0019685	0.0465002
	MM_GOBP_POSITIVE_REGULATION_OF_NEUTROPHIL_MIGRATION	-1.98058	0	0.0453263
	HS_HP_ABNORMAL_MEAN_CORPUSCULAR_HEMOGLOBIN_CONCENTRATION	-1.98148	0	0.0484151
	HS_DURANTE_ADULT_OLFACTORY_NEUROEPITHELIUM_CD4_T_CELLS	-1.98168	0	0.0488118
	HS_GOBP_HYDROGEN_PEROXIDE_METABOLIC_PROCESS	-1.98332	0.00190476	0.0480603
	HS_REACTOME_FCGR_ACTIVATION	-1.98808	0	0.0447877
	HS_EHRLICH_ICF_SYNDROM_UP	-1.98823	0	0.0453142
	MM_GOBP_DENDRITIC_CELL_CHEMOTAXIS	-1.98899	0	0.0394565
	MM_GOCC_T_CELL_RECEPTOR_COMPLEX	-1.98962	0	0.0398916
	HS_KLEIN_TARGETS_OF_BCR_ABL1_FUSION	-1.99146	0.00198413	0.0433006
	MM_WP_OXIDATIVE_STRESS_RESPONSE	-1.99175	0.00183486	0.0393241
	HS_GNF2_PCAF	-1.99176	0.00192678	0.043786
	MM_REACTOME_HEMOSTASIS	-1.9926	0	0.0396415
	MM_GOMF_IMMUNE_RECEPTOR_ACTIVITY	-1.99396	0	0.0396438
	HS_HP_SICK_SINUS_SYNDROME	-1.99466	0	0.042015
	MM_GOBP_DENDRITIC_CELL_MIGRATION	-1.99585	0	0.0395641
	HS_DESCARTES_MAIN_FETAL_MYELOID_CELLS	-1.99633	0	0.0411044
	HS_HP_POSTERIOR_PHARYNGEAL_CLEFT	-1.99974	0	0.0390568
	HS_GOBP_DENDRITIC_CELL_CHEMOTAXIS	-1.99981	0.00194932	0.0396325
	HS_GOMF_OXIDOREDUCTASE_ACTIVITY_ACTING_ON_PAIRED_DONORS_WITH_INCORPORATION_OR_REDUCTION_OF_MOLECULAR_OXYGEN_REDUCED_FLAVIN_OR_FLAVOPROTEIN_AS_ONE_DONOR_AND_INCORPORATION_OF_ONE_ATOM_OF_OXYGEN	-2.00012	0	0.0400417
	HS_HP_ABNORMAL_ATRIOVENTRICULAR_CONDUCTION	-2.00133	0	0.0397512
	HS_HAY_BONE_MARROW_FOLLICULAR_B_CELL	-2.00179	0	0.0399852
	HS_KUROZUMI_RESPONSE_TO_ONCOCYTIC_VIRUS_AND_CYCLIC_RGD	-2.00252	0	0.0401115
	HS_LEE_DIFFERENTIATING_T_LYMPHOCYTE	-2.00338	0	0.0398666
	HS_REACTOME_ROLE_OF_PHOSPHOLIPIDS_IN_PHAGOCYTOSIS	-2.00492	0	0.0393723
	HS_HP_VASCULITIS	-2.00877	0	0.0374437
	HS_MODULE_288	-2.00911	0	0.0379289
	HS_REACTOME_PARASITE_INFECTION	-2.00958	0	0.0382623
	HS_AIZARANI_LIVER_C3_NK_NKT_CELLS_2	-2.01132	0	0.0376958
	HS_KLEIN_PRIMARY_EFFUSION_LYMPHOMA_DN	-2.01261	0	0.0373081
	HS_GOBP_DENDRITIC_CELL_MIGRATION	-2.01302	0.00191571	0.0378065
	HS_DURANTE_ADULT_OLFACTORY_NEUROEPITHELIUM_B_CELLS	-2.01411	0	0.0376595
	HS_TRAVAGLINI_LUNG_B_CELL	-2.01453	0	0.0382569
	HS_RUBENSTEIN_SKELETAL_MUSCLE_B_CELLS	-2.01468	0	0.039047
	HS_HP_MENINGITIS	-2.01532	0	0.0393323
	MM_HEVNER_TELENCEPHALON_MICROGLIA	-2.01863	0	0.0248331
	HS_HP_THROMBOEMBOLISM	-2.02183	0	0.0354225
	HS_NAKAYA_PBMC_FLUAD_MALE_AGE_14_27YO_1D_POSTBOOST_VS_0D_PREIMM_MF59_ADJUVANTED_1DY_GENES_IN_BTM_M40_AND_M53_DN	-2.02198	0	0.0362019
	HS_GOMF_ANTIGEN_BINDING	-2.02444	0	0.0355497
	HS_HP_RIGHT_BUNDLE_BRANCH_BLOCK	-2.02679	0	0.0347322
	HS_REACTOME_COMPLEMENT_CASCADE	-2.02794	0	0.034616
	HS_AIZARANI_LIVER_C1_NK_NKT_CELLS_1	-2.03102	0	0.033511
	MM_GOBP_T_CELL_ACTIVATION	-2.03573	0	0.0182097
	MM_GOCC_IMMUNOGLOBULIN_COMPLEX	-2.03636	0	0.0185182
	MM_WP_MICROGLIA_PATHOGEN_PHAGOCYTOSIS_PATHWAY	-2.03653	0	0.0189386
	HS_GNF2_MYL3	-2.03792	0	0.0295444
	MM_GOBP_B_CELL_RECEPTOR_SIGNALING_PATHWAY	-2.04161	0	0.0175762
	MM_WP_GPCRS_PEPTIDE	-2.04672	0	0.0163318
	HS_GOBP_RESPONSE_TO_IRON_ION	-2.04734	0	0.024358
	HS_MCLACHLAN_DENTAL_CARIES_UP	-2.04899	0	0.0240115
	HS_HP_HEART_BLOCK	-2.06015	0	0.0194169
	HS_DESCARTES_MAIN_FETAL_CARDIOMYOCYTES	-2.06066	0	0.0195853
	MM_GOBP_LYMPHOCYTE_ACTIVATION	-2.06089	0	0.0116625
	HS_GOCC_T_CELL_RECEPTOR_COMPLEX	-2.06104	0	0.0198295
	HS_GOMF_G_PROTEIN_COUPLED_CHEMOATTRACTANT_RECEPTOR_ACTIVITY	-2.06234	0	0.0198144
	HS_HP_CARDIAC_CONDUCTION_ABNORMALITY	-2.0645	0	0.0195878
	MM_GOBP_T_CELL_PROLIFERATION	-2.0649	0	0.0108625
	MM_GOMF_ANTIGEN_BINDING	-2.06961	0	0.00990046
	HS_HP_ABNORMAL_MORPHOLOGY_OF_MYOCARDIAL_TRABECULAE	-2.07511	0	0.0155307
	HS_GSE10325_LUPUS_CD4_TCELL_VS_LUPUS_BCELL_DN	-2.07682	0	0.0153703
	HS_GOBP_POSITIVE_REGULATION_OF_T_CELL_PROLIFERATION	-2.08068	0	0.0144209
	MM_GOBP_REGULATION_OF_T_CELL_PROLIFERATION	-2.08442	0	0.0076354
	HS_REACTOME_FCERI_MEDIATED_CA_2_MOBILIZATION	-2.08633	0	0.0132852
	MM_GOMF_CORECEPTOR_ACTIVITY	-2.08889	0	0.00688935
	MM_REACTOME_VESICLE_MEDIATED_TRANSPORT	-2.09073	0	0.00681155
	HS_AIZARANI_LIVER_C34_MHC_II_POS_B_CELLS	-2.09109	0	0.0116888
	HS_HP_BUNDLE_BRANCH_BLOCK	-2.09341	0	0.0114007
	MM_GOBP_HYDROGEN_PEROXIDE_METABOLIC_PROCESS	-2.09513	0	0.00635146
	MM_GOBP_IMMUNE_RESPONSE	-2.10195	0	0.00585857
	HS_GSE4984_UNTREATED_VS_GALECTIN1_TREATED_DC_DN	-2.10423	0	0.0088808
	HS_WP_PEPTIDE_GPCRS	-2.10944	0	0.00788835
	HS_PATEL_SKIN_OF_BODY_ZOSTAVAX_AGE_70_93YO_VZV_CHALLENGE_3DY_UP	-2.11284	0	0.00774268
	HS_GOBP_B_CELL_RECEPTOR_SIGNALING_PATHWAY	-2.11385	0	0.00783936
	HS_DESCARTES_FETAL_PLACENTA_LYMPHOID_CELLS	-2.12441	0	0.00627934
	MM_REACTOME_ADAPTIVE_IMMUNE_SYSTEM	-2.12681	0	0.00347463
	HS_DESCARTES_FETAL_KIDNEY_LYMPHOID_CELLS	-2.1313	0	0.00546864
	HS_REACTOME_FCGR3A_MEDIATED_IL10_SYNTHESIS	-2.14447	0	0.00403575
	HS_GSE10325_CD4_TCELL_VS_BCELL_DN	-2.16362	0	0.0030063
	MM_TABULA_MURIS_SENIS_THYMUS_PROFESSIONAL_ANTIGEN_PRESENTING_CELL_AGEING	-2.17124	0	0.000939256
	HS_REACTOME_ANTIGEN_ACTIVATES_B_CELL_RECEPTOR_BCR_LEADING_TO_GENERATION_OF_SECOND_MESSENGERS	-2.17299	0	0.00258651
	HS_GOBP_RESPONSE_TO_HYPEROXIA	-2.17414	0	0.00274817
	HS_GOBP_RESPONSE_TO_INCREASED_OXYGEN_LEVELS	-2.17504	0	0.00285601
	HS_DESCARTES_FETAL_EYE_MICROGLIA	-2.17539	0	0.00290051
	MM_BOYLAN_MULTIPLE_MYELOMA_PCA1_UP	-2.1769	0	0.000735035
	HS_DESCARTES_FETAL_MUSCLE_MYELOID_CELLS	-2.17695	0	0.00295039
	MM_YAO_TEMPORAL_RESPONSE_TO_PROGESTERONE_CLUSTER_3	-2.1813	0	0.000665489
	MM_GOMF_G_PROTEIN_COUPLED_CHEMOATTRACTANT_RECEPTOR_ACTIVITY	-2.18738	0	0.000590241
	HS_DESCARTES_MAIN_FETAL_LYMPHOID_CELLS	-2.1958	0	0.00168956
	HS_CUI_DEVELOPING_HEART_C8_MACROPHAGE	-2.19746	0	0.00174018
	HS_DESCARTES_FETAL_ADRENAL_LYMPHOID_CELLS	-2.22231	0	0.00112427
	MM_GOBP_POSITIVE_REGULATION_OF_T_CELL_PROLIFERATION	-2.2268	0	0.000337101
	MM_DESCARTES_ORGANOGENESIS_WHITE_BLOOD_CELLS	-2.23961	0	0.000236889
	MM_GOCC_EXTERNAL_SIDE_OF_PLASMA_MEMBRANE	-2.26595	0	0
	HS_HP_ATRIAL_ARRHYTHMIA	-2.27465	0	0.000250515
	HS_DESCARTES_FETAL_LIVER_LYMPHOID_CELLS	-2.27504	0	0.000281829
	HS_TRAVAGLINI_LUNG_CD4_MEMORY_EFFECTOR_T_CELL	-2.31238	0	0
	MM_GOBP_PRODUCTION_OF_MOLECULAR_MEDIATOR_OF_IMMUNE_RESPONSE	-2.33202	0	0
	HS_DESCARTES_FETAL_HEART_LYMPHOID_CELLS	-2.33455	0	0
	MM_RASHI_RESPONSE_TO_IONIZING_RADIATION_6	-2.33661	0	0
	HS_DESCARTES_FETAL_INTESTINE_LYMPHOID_CELLS	-2.35234	0	0
	MM_REACTOME_INITIAL_TRIGGERING_OF_COMPLEMENT	-2.38956	0	0
	HS_DESCARTES_FETAL_PANCREAS_LYMPHOID_CELLS	-2.4016	0	0
	MM_REACTOME_CELL_SURFACE_INTERACTIONS_AT_THE_VASCULAR_WALL	-2.41189	0	0
	MM_REACTOME_ROLE_OF_LAT2_NTAL_LAB_ON_CALCIUM_MOBILIZATION	-2.41661	0	0
	MM_REACTOME_COMPLEMENT_CASCADE	-2.42019	0	0
	MM_REACTOME_FCERI_MEDIATED_CA_2_MOBILIZATION	-2.4214	0	0
	MM_REACTOME_BINDING_AND_UPTAKE_OF_LIGANDS_BY_SCAVENGER_RECEPTORS	-2.42476	0	0
	MM_REACTOME_ANTIGEN_ACTIVATES_B_CELL_RECEPTOR_BCR_LEADING_TO_GENERATION_OF_SECOND_MESSENGERS	-2.43165	0	0
	HS_DESCARTES_FETAL_STOMACH_LYMPHOID_CELLS	-2.43328	0	0
	HS_DESCARTES_FETAL_SPLEEN_LYMPHOID_CELLS	-2.43793	0	0
	MM_REACTOME_FCERI_MEDIATED_MAPK_ACTIVATION	-2.45032	0	0
	MM_REACTOME_ROLE_OF_PHOSPHOLIPIDS_IN_PHAGOCYTOSIS	-2.45864	0	0
	MM_REACTOME_FCGAMMA_RECEPTOR_FCGR_DEPENDENT_PHAGOCYTOSIS	-2.4739	0	0
	HS_DESCARTES_FETAL_LUNG_LYMPHOID_CELLS	-2.47651	0	0
	MM_REACTOME_IMMUNOREGULATORY_INTERACTIONS_BETWEEN_A_LYMPHOID_AND_A_NON_LYMPHOID_CELL	-2.48065	0	0
	MM_REACTOME_SIGNALING_BY_THE_B_CELL_RECEPTOR_BCR	-2.49208	0	0
	MM_GOBP_IMMUNOGLOBULIN_PRODUCTION	-2.50026	0	0
	MM_REACTOME_FCERI_MEDIATED_NF_KB_ACTIVATION	-2.557	0	0
	MM_REACTOME_FC_EPSILON_RECEPTOR_FCERI_SIGNALING	-2.56289	0	0
