# Supplementary material for: Microplastics dysregulate innate immunity in the SARS-CoV-2 infected lung
Source: Front Immunol. 2024 May 13;15:1382655. doi: 10.3389/fimmu.2024.1382655 (PMC11128561; doi:10.3389/fimmu.2024.1382655)
Supplement: Supplementary file 6 [file Table_5.xlsx]

## Sheet: a Alignment summary
	Sample name	Group	dpi	Total reads
Paired RNA-Seq reads were aligned to the mouse GRCm39 and the SARS-CoV-2 BA.5 reference genomes. Paired alignments were counted using Samtools	M1	BA.5	2	39113842
	M2	BA.5	2	36777196
	M3	BA.5	2	39260892
	M4	BA.5	2	32540688
	M5	BA.5	2	28859364
	M6	BA.5	2	35688846
	M1	PBS	2	90966686
	M2	PBS	2	100375284
	M3	PBS	2	105029718
	M4	PBS	2	105957740
	M5	PBS	2	91622386
	M6	PBS	2	92543254

## Sheet: b All genes BA.5 vs PBS 2dpi
	Ensembl_ID	HUGO_ID	logFC	logCPM	F	PValue	FDR
BA.5 infected (mACE2-hACE2) versus mock infected (PBS) (C57BL/6J). Differential expression statistics for all genes from lungs at 2 dpi.	ENSMUSG00000067736.3	Gm10222	14.1951	5.19774	69.5257	7.42864e-07	6.50341e-06
	ENSMUSG00000000028.16	Cdc45	0.249053	1.62017	4.30656	0.0492093	0.0858333
	ENSMUSG00000000031.18	H19	0.48836	0.409931	1.78879	0.19401	0.273005
	ENSMUSG00000086216.2	Gm13610	11.4918	2.66383	107.547	4.41499e-09	9.2651e-08
	ENSMUSG00000085543.2	Gm13568	9.6451	0.160754	156.117	2.19798e-10	7.80662e-09
	ENSMUSG00000094127.2	G530012D18Rik	8.90136	-0.901377	36.952	2.63304e-05	0.00013533
	ENSMUSG00000000085.17	Scmh1	0.0109803	5.75557	0.0549837	0.81666	0.859801
	ENSMUSG00000100454.2	Gm28901	7.46289	-0.78968	6.66873	0.0186437	0.0375306
	ENSMUSG00000000093.7	Tbx2	0.128946	8.53116	3.1206	0.0904351	0.143938
	ENSMUSG00000034855.14	Cxcl10	6.27493	5.82356	309.493	6.20848e-15	1.5922e-12
	ENSMUSG00000000120.7	Ngfr	0.305538	0.999198	1.1637	0.291764	0.382275
	ENSMUSG00000060183.8	Cxcl11	5.94817	-0.944229	145.749	1.69269e-11	9.19589e-10
	ENSMUSG00000000127.16	Fer	0.0530705	3.91514	1.34779	0.266334	0.355255
	ENSMUSG00000000131.16	Xpo6	-0.0318089	6.18458	1.18024	0.288441	0.378575
	ENSMUSG00000025165.13	Sectm1a	5.41087	0.0353952	225.564	1.84359e-13	2.43564e-11
	ENSMUSG00000035373.3	Ccl7	4.89941	2.39621	188.807	1.19213e-12	1.09419e-10
	ENSMUSG00000000148.18	Brat1	-0.11773	4.87508	5.43085	0.028812	0.0544075
	ENSMUSG00000031710.5	Ucp1	4.76944	2.25409	11.0432	0.00293064	0.00768938
	ENSMUSG00000000154.17	Slc22a18	0.223328	2.92666	3.8471	0.0619139	0.104431
	ENSMUSG00000000157.17	Itgb2l	-0.49033	0.426261	4.83666	0.038066	0.0690055
	ENSMUSG00000000159.17	Igsf5	0.138458	4.39859	4.97249	0.0356884	0.0653338
	ENSMUSG00000000386.19	Mx1	4.72773	5.76922	490.198	3.95947e-17	2.87705e-14
	ENSMUSG00000000168.11	Dlat	0.142761	5.37728	4.31548	0.0489938	0.0855259
	ENSMUSG00000020641.17	Rsad2	4.72736	6.23052	442.956	1.2188e-16	6.64207e-14
	ENSMUSG00000035692.8	Isg15	4.69476	6.4077	718.491	5.46325e-19	1.5879e-15
	ENSMUSG00000000194.14	Gpr107	0.0466764	6.29528	2.35939	0.138028	0.205732
	ENSMUSG00000034459.9	Ifit1	4.33043	7.17736	719.764	5.35521e-19	1.5879e-15
	ENSMUSG00000000216.9	Scnn1g	0.117104	7.4811	3.89555	0.0604122	0.102256
	ENSMUSG00000000223.14	Drp2	0.511589	0.239485	2.68673	0.114649	0.175737
	ENSMUSG00000041827.16	Oasl1	4.31076	4.7166	570.871	7.2365e-18	8.41315e-15
	ENSMUSG00000025498.16	Irf7	4.22705	7.69087	667.767	1.24616e-18	2.42549e-15
	ENSMUSG00000000266.12	Mid2	-0.102334	6.02987	1.19804	0.284922	0.374549
	ENSMUSG00000025746.12	Il6	4.16164	0.282356	62.6929	4.73833e-08	6.53732e-07
	ENSMUSG00000035385.6	Ccl2	4.13618	2.53143	128.848	5.80901e-11	2.64148e-09
	ENSMUSG00000039364.14	Sectm1b	4.0937	0.983484	111.129	2.47871e-10	8.55964e-09
	ENSMUSG00000000282.13	Mnt	0.0973006	5.69891	2.94378	0.0995057	0.155938
	ENSMUSG00000028037.14	Ifi44	3.95868	5.8656	448.015	1.07479e-16	6.04622e-14
	ENSMUSG00000079362.6	Gm43302	3.93832	3.46846	87.4332	2.41383e-09	5.62013e-08
	ENSMUSG00000000296.9	Tpd52l1	0.0863963	0.245286	0.273469	0.631152	0.70774
	ENSMUSG00000000301.17	Pemt	0.227258	0.626898	2.05655	0.164866	0.23832
	ENSMUSG00000000303.13	Cdh1	-0.00732314	8.54122	0.0478589	0.828741	0.869998
	ENSMUSG00000074896.4	Ifit3	3.87266	8.7624	563.564	8.35817e-18	9.10988e-15
	ENSMUSG00000000308.15	Ckmt1	0.060951	4.0525	0.340915	0.564924	0.649121
	ENSMUSG00000062488.10	Ifit3b	3.84668	6.86491	553.534	1.02163e-17	1.01984e-14
	ENSMUSG00000000318.17	Clec10a	-0.307447	2.88498	3.44247	0.0762625	0.124807
	ENSMUSG00000000320.11	Alox12	-0.382767	3.10927	3.14412	0.0893023	0.142496
	ENSMUSG00000023341.17	Mx2	3.83485	4.2233	596.982	4.38555e-18	6.95268e-15
	ENSMUSG00000066861.15	Oas1g	3.83334	3.63035	474.13	5.73411e-17	3.7036e-14
	ENSMUSG00000000340.11	Dbt	-0.146504	4.74768	4.70311	0.0405784	0.0728707
	ENSMUSG00000000346.10	Dazap2	0.016731	8.51308	0.377532	0.544893	0.630467
	ENSMUSG00000022548.15	Apod	3.8321	5.64481	323.617	3.82369e-15	1.02587e-12
	ENSMUSG00000032661.10	Oas3	3.70757	4.60324	279.767	1.84905e-14	3.83877e-12
	ENSMUSG00000078616.3	Trim30c	3.61641	-0.687096	93.6561	1.26991e-09	3.35038e-08
	ENSMUSG00000057346.13	Apol9a	3.58433	3.50304	324.202	3.74937e-15	1.02164e-12
	ENSMUSG00000022126.7	Acod1	3.57043	1.32302	47.74	4.5342e-07	4.32324e-06
	ENSMUSG00000000204.17	Slfn4	3.54588	4.79549	161.311	6.04197e-12	4.0216e-10
	ENSMUSG00000078922.10	Tgtp1	3.50313	6.68763	105.591	4.05982e-10	1.28726e-08
	ENSMUSG00000090877.4	Hspa1b	3.33617	6.47388	38.9037	2.19531e-06	1.62634e-05
	ENSMUSG00000000399.11	Ndufa9	0.0832347	5.7186	2.20199	0.151263	0.222175
	ENSMUSG00000000402.3	Egfl6	0.165141	6.38539	4.16333	0.0528221	0.0911233
	ENSMUSG00000000409.15	Lck	0.261801	4.36102	3.91692	0.0597629	0.101342
	ENSMUSG00000063388.6	BC023105	3.31701	1.41731	165.989	4.50911e-12	3.23598e-10
	ENSMUSG00000000420.16	Galnt1	0.0532112	6.79886	2.03273	0.167232	0.241281
	ENSMUSG00000027514.15	Zbp1	3.22502	5.66375	232.672	1.32705e-13	1.85139e-11
	ENSMUSG00000000440.13	Pparg	-0.02093	3.80665	0.0217851	0.883933	0.912394
	ENSMUSG00000079339.8	Ifit1bl1	3.2187	4.44435	344.971	1.90554e-15	6.23454e-13
	ENSMUSG00000000486.14	Septin1	-0.293956	4.5277	5.60903	0.0265498	0.0506954
	ENSMUSG00000026536.10	Ifi211	3.17741	4.64352	244.623	7.79042e-14	1.14166e-11
	ENSMUSG00000030107.11	Usp18	3.16896	6.04461	671.646	1.16755e-18	2.42549e-15
	ENSMUSG00000052776.11	Oas1a	3.16525	5.32626	539.364	1.3649e-17	1.19012e-14
	ENSMUSG00000000532.12	Acvr1b	-0.0340235	6.55088	0.619249	0.439274	0.530947
	ENSMUSG00000054203.8	Ifi205	3.10581	4.26275	193.271	9.34644e-13	9.0842e-11
	ENSMUSG00000068246.7	Apol9b	3.06277	4.32156	270.543	2.65191e-14	4.81735e-12
	ENSMUSG00000029561.18	Oasl2	3.06014	7.98175	667.501	1.25176e-18	2.42549e-15
	ENSMUSG00000045932.13	Ifit2	3.04519	6.92456	427.171	1.82058e-16	8.81919e-14
	ENSMUSG00000028341.10	Nr4a3	3.01802	3.66924	243.696	8.11194e-14	1.17887e-11
	ENSMUSG00000020638.9	Cmpk2	3.00174	6.33723	547.822	1.14718e-17	1.05293e-14
	ENSMUSG00000035352.4	Ccl12	2.96854	1.2708	126.836	6.78936e-11	2.98236e-09
	ENSMUSG00000029417.10	Cxcl9	2.96534	2.96367	68.8149	2.10595e-08	3.3911e-07
	ENSMUSG00000000579.15	Dynlt1c	0.126465	3.84203	2.04336	0.166171	0.239948
	ENSMUSG00000000581.9	C1d	0.0228015	4.21426	0.147987	0.703962	0.769487
	ENSMUSG00000053475.6	Tnfaip6	2.93361	0.737585	185.238	1.45359e-12	1.26746e-10
	ENSMUSG00000000600.16	Krit1	0.0694221	5.26923	1.22003	0.280655	0.370401
	ENSMUSG00000029371.8	Cxcl5	2.85908	0.801179	27.3601	2.55154e-05	0.000131646
	ENSMUSG00000000627.16	Sema4f	0.165282	4.76845	4.22513	0.0512278	0.0887929
	ENSMUSG00000026166.15	Ccl20	2.84492	0.197073	53.7702	1.72829e-07	1.94198e-06
	ENSMUSG00000068606.7	Gm4841	2.8275	1.09263	119.19	1.25247e-10	4.96404e-09
	ENSMUSG00000073489.7	Ifi204	2.78626	4.69171	202.77	5.66063e-13	6.05618e-11
	ENSMUSG00000000682.8	Cd52	0.182091	5.87475	3.2715	0.083444	0.134602
	ENSMUSG00000000686.12	Abhd15	0.170365	1.74441	1.53977	0.227026	0.311692
	ENSMUSG00000000690.6	Hoxb6	-0.117629	1.96962	0.615952	0.440479	0.532093
	ENSMUSG00000033847.16	Pla2g4c	2.75924	-0.66209	94.4834	1.16904e-09	3.10775e-08
	ENSMUSG00000058163.15	Gm5431	2.74626	3.45499	393.244	4.53404e-16	1.87778e-13
	ENSMUSG00000095427.3	Rps2-ps6	2.73028	0.236749	28.0978	2.14509e-05	0.000113462
	ENSMUSG00000000732.10	Icosl	-0.0968664	5.42246	1.78905	0.193979	0.272983
	ENSMUSG00000091971.4	Hspa1a	2.71043	6.194	25.8903	3.63469e-05	0.00017855
	ENSMUSG00000000739.15	Sult5a1	-0.0220182	3.52937	0.0261047	0.873041	0.904524
	ENSMUSG00000044703.6	Phf11a	2.69752	1.88866	198.367	7.12273e-13	7.43792e-11
	ENSMUSG00000000743.10	Chmp1a	0.0183535	6.52482	0.370358	0.548709	0.634208
	ENSMUSG00000032690.17	Oas2	2.66488	5.62133	295.444	1.02673e-14	2.33845e-12
	ENSMUSG00000068245.15	Phf11d	2.64277	6.3072	728.278	4.69008e-19	1.5879e-15
	ENSMUSG00000113311.2	Gm47428	2.62762	-0.737055	28.6224	1.89906e-05	0.000102373
	ENSMUSG00000017830.16	Dhx58	2.61792	5.12214	603.957	3.8501e-18	6.7142e-15
	ENSMUSG00000069793.13	Slfn9	2.57653	3.6157	271.299	2.57362e-14	4.77461e-12
	ENSMUSG00000000787.13	Ddx3x	0.146433	8.4136	1.60363	0.21793	0.300814
	ENSMUSG00000105096.2	Gbp10	2.50802	2.94398	58.3077	8.78971e-08	1.09488e-06
	ENSMUSG00000000792.3	Slc5a5	0.16818	-0.203082	0.632487	0.434488	0.526329
	ENSMUSG00000000794.10	Kcnn3	-0.195947	3.41339	3.90625	0.0600863	0.101762
	ENSMUSG00000001131.12	Timp1	2.5066	3.39861	148.282	1.42228e-11	7.92432e-10
	ENSMUSG00000000805.19	Car4	-0.0612794	7.53661	1.33186	0.2602	0.348458
	ENSMUSG00000000811.15	Txnrd3	-0.114267	4.37813	3.04632	0.094124	0.148694
	ENSMUSG00000000817.11	Fasl	0.253936	-0.160566	1.06266	0.313215	0.404994
	ENSMUSG00000033355.7	Rtp4	2.50394	6.06023	571.161	7.19546e-18	8.41315e-15
	ENSMUSG00000079017.4	Ifi27l2a	2.49537	6.34689	184.773	1.49201e-12	1.28173e-10
	ENSMUSG00000086866.3	4930512H18Rik	2.45427	-0.557823	76.774	7.93626e-09	1.49946e-07
	ENSMUSG00000022586.12	Ly6i	2.43144	3.46735	47.1586	4.99806e-07	4.71396e-06
	ENSMUSG00000015947.11	Fcgr1	2.41674	3.61331	203.106	5.5631e-13	5.98857e-11
	ENSMUSG00000027832.6	Ptx3	2.41191	1.00423	61.6309	5.48669e-08	7.38272e-07
	ENSMUSG00000000881.13	Dlg3	-0.0843363	5.35843	3.05707	0.0935796	0.147994
	ENSMUSG00000000884.18	Gnb1l	-0.00207387	2.00754	0.000311071	0.986079	0.989825
	ENSMUSG00000046718.9	Bst2	2.398	6.95967	332.104	2.88465e-15	8.27461e-13
	ENSMUSG00000001494.7	Sost	2.39636	-0.0225362	46.0157	6.06754e-07	5.51103e-06
	ENSMUSG00000003665.8	Has1	2.37554	0.733097	81.6354	4.54219e-09	9.48638e-08
	ENSMUSG00000000915.16	Hip1r	-0.0499667	6.75846	1.70581	0.204303	0.285256
	ENSMUSG00000110588.2	Gm45774	2.35005	0.753661	51.3478	2.52179e-07	2.6653e-06
	ENSMUSG00000000934.10	Top1mt	-0.0623167	2.27551	0.628044	0.461057	0.551731
	ENSMUSG00000000942.11	Hoxa4	-0.196962	3.04564	4.68573	0.0409189	0.0733612
	ENSMUSG00000000957.12	Mmp14	0.126807	6.4668	2.3812	0.136305	0.203634
	ENSMUSG00000000958.11	Slc7a7	0.0228662	4.43277	0.104919	0.748901	0.805432
	ENSMUSG00000000959.8	Oxa1l	-0.0834547	5.57494	4.21482	0.0514899	0.0891513
	ENSMUSG00000057596.14	Trim30d	2.3356	5.34161	503.439	2.94336e-17	2.33315e-14
	ENSMUSG00000000982.6	Ccl3	0.454714	1.10704	2.00582	0.169955	0.24442
	ENSMUSG00000001014.7	Icam4	-0.168049	0.0103785	0.740663	0.398236	0.491322
	ENSMUSG00000001016.13	Ilf2	0.027989	5.70144	0.515742	0.479818	0.569802
	ENSMUSG00000035208.17	Slfn8	2.33219	4.61092	194.858	8.58234e-13	8.50383e-11
	ENSMUSG00000057836.13	Xlr3a	2.32927	0.855547	15.0901	0.000737347	0.00235376
	ENSMUSG00000001020.9	S100a4	-0.0562524	4.74398	0.189187	0.667605	0.737751
	ENSMUSG00000001025.9	S100a6	-0.0472797	7.57068	0.257938	0.616325	0.694543
	ENSMUSG00000091649.4	Phf11b	2.31005	3.89586	251.35	5.83268e-14	8.92247e-12
	ENSMUSG00000085105.3	Gm12758	2.26889	4.80491	187.957	1.24943e-12	1.13483e-10
	ENSMUSG00000024675.20	Ms4a4c	2.26187	3.87836	108.736	3.05997e-10	1.02228e-08
	ENSMUSG00000029798.12	Herc6	2.25377	5.50014	339.589	2.26236e-15	6.80229e-13
	ENSMUSG00000001039.13	B9d1	-0.186107	3.14731	4.57293	0.0432079	0.0768724
	ENSMUSG00000001052.16	Sec24b	-0.0761434	6.40629	5.43885	0.028706	0.0542424
	ENSMUSG00000033576.13	Apol6	2.25324	3.02524	66.5306	2.83131e-08	4.29349e-07
	ENSMUSG00000001054.10	Rmnd5b	0.123211	4.92944	5.24467	0.0314085	0.0585998
	ENSMUSG00000001056.4	Nhp2	0.098026	3.83314	2.19267	0.152094	0.222981
	ENSMUSG00000001062.19	Vps9d1	0.00488242	4.8786	0.00870053	0.926483	0.946067
	ENSMUSG00000001065.16	Zfp276	0.0621633	5.20402	1.34838	0.257344	0.34535
	ENSMUSG00000040026.9	Saa3	2.25305	3.69903	15.4398	0.00065963	0.00214374
	ENSMUSG00000033880.12	Lgals3bp	2.24389	8.66826	552.055	1.05265e-17	1.01984e-14
	ENSMUSG00000039196.3	Orm1	2.24364	1.36653	31.4446	1.00751e-05	5.9559e-05
	ENSMUSG00000086596.3	Susd5	2.24065	0.390316	111.503	2.39924e-10	8.38485e-09
	ENSMUSG00000040483.16	Xaf1	2.21387	6.13094	391.676	4.73778e-16	1.87778e-13
	ENSMUSG00000001105.16	Ift20	-0.0585035	5.44077	1.81715	0.19064	0.269066
	ENSMUSG00000092386.2	Gm20536	2.21014	2.16135	9.66772	0.00489629	0.0119288
	ENSMUSG00000094930.3	Igkv6-25	2.19445	0.309249	7.66952	0.0108443	0.0235686
	ENSMUSG00000047230.7	Cldn2	2.19222	0.940147	88.0509	2.2611e-09	5.32857e-08
	ENSMUSG00000001127.13	Araf	-0.0220868	6.63924	0.509165	0.482602	0.57229
	ENSMUSG00000037849.9	Ifi206	2.14358	4.45266	357.374	1.29514e-15	4.60938e-13
	ENSMUSG00000092021.10	Gbp11	2.14227	1.03712	106.333	3.79538e-10	1.21893e-08
	ENSMUSG00000001134.10	Uxt	0.159384	2.84986	2.79236	0.108122	0.167202
	ENSMUSG00000073437.12	D330041H03Rik	2.12992	5.13904	253.606	5.30158e-14	8.30735e-12
	ENSMUSG00000001143.14	Lman2l	-0.0538631	4.98038	1.00604	0.326178	0.418867
	ENSMUSG00000028268.15	Gbp3	2.12769	6.53674	167.417	4.12978e-12	3.01336e-10
	ENSMUSG00000030921.18	Trim30a	2.12422	6.39967	339.655	2.2576e-15	6.80229e-13
	ENSMUSG00000054072.13	Iigp1	2.12322	7.22242	77.9633	6.90625e-09	1.34268e-07
	ENSMUSG00000024679.11	Ms4a6d	2.11856	3.36952	162.892	5.4684e-12	3.72513e-10
	ENSMUSG00000063314.6	Gm12657	2.11687	-0.521251	15.6967	0.00060825	0.00199535
	ENSMUSG00000041737.9	Tmem45b	2.10391	2.59476	8.48106	0.00779117	0.0178144
	ENSMUSG00000049734.10	Trex1	2.10314	4.6838	303.257	7.74095e-15	1.87492e-12
	ENSMUSG00000104713.5	Gbp6	2.09513	6.92296	89.1183	2.02133e-09	4.86206e-08
	ENSMUSG00000001211.16	Agpat3	-0.0358455	7.26835	1.02602	0.321521	0.413557
	ENSMUSG00000010601.15	Apol7a	2.09415	0.31377	75.9333	8.76467e-09	1.63124e-07
	ENSMUSG00000001228.15	Uhrf1	0.283396	3.23329	2.38088	0.13633	0.203654
	ENSMUSG00000026582.8	Sele	2.08165	1.45164	38.0553	2.58514e-06	1.86754e-05
	ENSMUSG00000046879.8	Irgm1	2.07044	6.96036	163.523	5.25624e-12	3.65194e-10
	ENSMUSG00000029605.18	Oas1b	2.07039	4.20562	298.2	9.2863e-15	2.15925e-12
	ENSMUSG00000073555.2	Gm4951	2.06719	4.26513	76.8586	7.85773e-09	1.48947e-07
	ENSMUSG00000001249.15	Hpn	-0.0935399	3.69657	1.10741	0.303459	0.394809
	ENSMUSG00000027078.15	Ube2l6	2.05736	6.1673	245.452	7.5144e-14	1.12969e-11
	ENSMUSG00000001280.14	Sp1	-0.0525305	6.77555	0.852816	0.365242	0.459407
	ENSMUSG00000001281.11	Itgb7	-0.0321437	5.5152	0.074777	0.786919	0.836773
	ENSMUSG00000001285.13	Myg1	-0.0504537	4.73003	0.964342	0.336204	0.429371
	ENSMUSG00000095134.3	Mid1-ps1	2.04794	-0.0920033	10.3234	0.00382149	0.00965142
	ENSMUSG00000070327.15	Rnf213	2.03337	8.08912	477.298	5.32544e-17	3.57194e-14
	ENSMUSG00000001300.17	Efnb2	-0.0203628	7.82431	0.112859	0.739925	0.797747
	ENSMUSG00000001305.6	Rrp15	0.0878886	3.40519	1.68791	0.206612	0.287972
	ENSMUSG00000107951.2	Gm6210	2.02989	-0.553926	22.1619	9.40292e-05	0.000402794
	ENSMUSG00000001323.18	Srr	-0.0738175	5.14934	1.84198	0.187748	0.265671
	ENSMUSG00000001333.10	Sync	0.308833	1.43109	4.29066	0.0495963	0.0863959
	ENSMUSG00000001334.10	Fndc5	-0.17162	3.68266	0.537834	0.470662	0.561146
	ENSMUSG00000001348.16	Acp5	0.224609	4.61308	2.81085	0.107024	0.16584
	ENSMUSG00000090231.11	Cfb	2.02377	6.7215	115.137	1.75657e-10	6.53153e-09
	ENSMUSG00000023078.7	Cxcl13	2.02029	2.60294	28.5035	1.95199e-05	0.000104967
	ENSMUSG00000001376.18	Vps50	0.0438801	4.43887	0.636177	0.433169	0.525133
	ENSMUSG00000001380.8	Hars	0.101137	5.27461	4.68873	0.0408597	0.0732778
	ENSMUSG00000001383.10	Zmat2	-0.0275551	5.88727	0.47714	0.496559	0.58514
	ENSMUSG00000001403.14	Ube2c	-0.0101718	1.88964	0.00155302	0.968901	0.977187
	ENSMUSG00000001415.11	Smg5	0.0116249	6.26226	0.12518	0.726671	0.787551
	ENSMUSG00000018930.4	Ccl4	2.01559	0.73225	75.1175	9.65896e-09	1.75278e-07
	ENSMUSG00000040428.20	Plekha4	2.00212	3.90582	271.786	2.52446e-14	4.73377e-12
	ENSMUSG00000001419.18	Mef2d	-0.0252966	7.36358	0.62647	0.436654	0.528402
	ENSMUSG00000001420.14	Tmem79	0.186024	2.65871	1.98121	0.172492	0.247554
	ENSMUSG00000085977.2	Gm5970	1.97203	0.427301	49.2681	3.52367e-07	3.50112e-06
	ENSMUSG00000078763.3	Slfn1	1.97042	4.14385	155.494	8.78611e-12	5.48749e-10
	ENSMUSG00000001436.16	Slc19a1	-0.189646	2.99551	4.31279	0.0490588	0.085605
	ENSMUSG00000001440.6	Kpnb1	0.0329524	7.47987	1.22936	0.278868	0.368619
	ENSMUSG00000001441.14	Npepps	-0.01702	6.3587	0.162185	0.690832	0.75789
	ENSMUSG00000001444.3	Tbx21	0.250961	2.28522	2.35421	0.138441	0.206225
	ENSMUSG00000001445.11	Mrpl10	0.0878697	5.44236	3.08897	0.0919853	0.146016
	ENSMUSG00000073490.12	Ifi207	1.95995	4.6945	252.024	5.66811e-14	8.74745e-12
	ENSMUSG00000086714.3	0610009E02Rik	1.95932	4.34386	155.585	8.73386e-12	5.48749e-10
	ENSMUSG00000026697.11	Myoc	1.93554	0.00416147	9.429	0.00536675	0.0129091
	ENSMUSG00000001482.16	Def8	-0.0815237	5.13372	3.55117	0.0720656	0.119044
	ENSMUSG00000037921.16	Ddx60	1.93415	3.99134	270.55	2.65114e-14	4.81735e-12
	ENSMUSG00000049892.8	Rasd1	1.9325	2.69245	46.555	5.5348e-07	5.1205e-06
	ENSMUSG00000026104.15	Stat1	1.91642	8.1436	179.946	1.96291e-12	1.63006e-10
	ENSMUSG00000041347.6	Bdkrb1	1.91217	1.64092	80.0743	5.41783e-09	1.09486e-07
	ENSMUSG00000053113.4	Socs3	1.90997	6.33376	177.967	2.20072e-12	1.79338e-10
	ENSMUSG00000020893.18	Per1	1.87981	6.97685	168.142	3.95061e-12	2.90695e-10
	ENSMUSG00000031431.14	Tsc22d3	1.87791	7.83921	116.682	1.5422e-10	5.89791e-09
	ENSMUSG00000001508.16	Sgca	0.0824588	0.961178	0.0970836	0.758135	0.813228
	ENSMUSG00000001517.15	Foxm1	0.0215595	3.14525	0.014606	0.904844	0.929413
	ENSMUSG00000035852.12	Misp	1.86449	3.77097	312.232	5.64263e-15	1.46868e-12
	ENSMUSG00000001520.13	Nrip2	0.132198	-0.336599	0.349846	0.559907	0.644333
	ENSMUSG00000021614.17	Vcan	1.8588	3.52166	208.454	4.23541e-13	4.92409e-11
	ENSMUSG00000001524.15	Gtf2h4	0.127102	3.38059	3.91293	0.0598837	0.101475
	ENSMUSG00000082292.4	Gm12250	1.8535	3.64411	25.0081	4.51922e-05	0.000214977
	ENSMUSG00000046031.8	Calhm6	1.85142	1.37546	68.7739	2.11703e-08	3.39952e-07
	ENSMUSG00000038037.6	Socs1	1.83586	2.84758	98.9484	7.5531e-10	2.17357e-08
	ENSMUSG00000070427.5	Il18bp	1.83571	4.08104	159.236	6.89583e-12	4.50398e-10
	ENSMUSG00000001569.11	Nom1	-0.0271689	5.146	0.57438	0.456137	0.547082
	ENSMUSG00000001123.16	Lgals9	1.83274	7.57258	579.108	6.16449e-18	8.26943e-15
	ENSMUSG00000001583.14	Tnk1	0.0376688	3.87239	0.339236	0.565876	0.649803
	ENSMUSG00000001588.13	Acap1	-0.265215	4.63308	5.42994	0.0288242	0.0544245
	ENSMUSG00000033213.17	AA467197	1.81949	1.09994	54.1645	1.62708e-07	1.8473e-06
	ENSMUSG00000022584.15	Ly6c2	1.8126	5.18034	114.668	1.82772e-10	6.75289e-09
	ENSMUSG00000027317.9	Ppp1r14d	1.80822	0.774558	81.604	4.55822e-09	9.49399e-08
	ENSMUSG00000091549.2	Gm6548	1.78958	4.7693	808.458	1.44123e-19	1.25668e-15
	ENSMUSG00000114759.2	Gm10257	1.78943	-0.045452	42.4491	1.13578e-06	9.31227e-06
	ENSMUSG00000001663.11	Gstt1	0.0441882	6.36011	0.65808	0.425465	0.518279
	ENSMUSG00000001349.6	Cnn1	1.78806	5.55026	111.968	2.30435e-10	8.09389e-09
	ENSMUSG00000001666.9	Ddt	-0.0376555	4.61329	0.277688	0.603212	0.683079
	ENSMUSG00000006930.16	Hap1	1.78541	5.13937	330.5	3.04086e-15	8.55315e-13
	ENSMUSG00000120878.1	ENSMUSG00000120878.1	1.77765	1.36193	64.1943	3.86316e-08	5.54939e-07
	ENSMUSG00000001674.12	Ddx18	-0.0277385	5.11943	0.339723	0.5656	0.64964
	ENSMUSG00000030156.6	Cd69	1.77348	2.53566	69.9257	1.82855e-08	3.01615e-07
	ENSMUSG00000025492.7	Ifitm3	1.7653	9.01222	420.102	2.18907e-16	9.93793e-14
	ENSMUSG00000059430.15	Actg2	1.76479	4.67023	153.143	1.02574e-11	6.15814e-10
	ENSMUSG00000046828.4	Mettl21e	1.76268	0.479792	49.6838	3.29319e-07	3.30627e-06
	ENSMUSG00000073491.12	Ifi213	1.75718	5.29707	201.928	5.91277e-13	6.24926e-11
	ENSMUSG00000050896.13	Rtn4rl2	1.75651	0.970863	61.4963	5.59039e-08	7.48203e-07
	ENSMUSG00000023036.15	Pcdhgc4	1.74422	6.43421	146.711	1.58391e-11	8.77831e-10
	ENSMUSG00000078920.4	Ifi47	1.74335	6.70784	105.672	4.03006e-10	1.28015e-08
	ENSMUSG00000001755.13	Coasy	0.0837994	4.78928	1.94068	0.176771	0.252475
	ENSMUSG00000001761.8	Smo	0.0723559	5.75458	1.3348	0.259689	0.347908
	ENSMUSG00000001763.15	Tspan33	0.0760231	1.8672	0.288007	0.596599	0.677041
	ENSMUSG00000001767.6	Crnkl1	-0.0149699	4.71732	0.11413	0.738521	0.796734
	ENSMUSG00000001768.17	Rin2	0.00247385	7.60073	0.00390262	0.950722	0.963876
	ENSMUSG00000048852.14	Gm12185	1.73905	3.67842	73.2954	1.2036e-08	2.09896e-07
	ENSMUSG00000001783.4	Rtcb	-0.0335028	6.81662	0.499114	0.486909	0.575832
	ENSMUSG00000001785.14	Pwp1	0.0413898	4.53081	0.499366	0.4868	0.575789
	ENSMUSG00000071637.6	Cebpd	1.73543	6.21216	120.973	1.08263e-10	4.40091e-09
	ENSMUSG00000040033.17	Stat2	1.72502	7.29079	276.234	2.12015e-14	4.24981e-12
	ENSMUSG00000001802.17	Lrp3	0.129952	4.27462	4.56141	0.0434499	0.0772319
	ENSMUSG00000001829.18	Clpb	0.0836512	4.77919	3.1084	0.0910296	0.144736
	ENSMUSG00000035148.5	Gpr33	1.71349	-0.444668	54.4714	1.55275e-07	1.77447e-06
	ENSMUSG00000001844.11	Zdhhc4	-0.0121505	5.08248	0.0777618	0.782819	0.833277
	ENSMUSG00000039236.19	Isg20	1.71114	5.78561	319.486	4.39693e-15	1.16179e-12
	ENSMUSG00000022906.16	Parp9	1.69782	6.40477	416.178	2.42792e-16	1.05851e-13
	ENSMUSG00000001864.14	Aif1l	0.0934939	2.6123	0.786757	0.384165	0.478055
	ENSMUSG00000001865.3	Cpa3	0.778218	-0.0039809	3.04698	0.0940905	0.148668
	ENSMUSG00000029321.2	Slc10a6	1.69617	4.81031	426.052	1.87412e-16	8.8332e-14
	ENSMUSG00000078853.9	Igtp	1.69401	6.98582	36.7141	3.36364e-06	2.34728e-05
	ENSMUSG00000001909.17	Trmt1	-0.065863	5.26602	2.02272	0.168238	0.242432
	ENSMUSG00000039956.10	Mrap	1.67973	1.56429	11.38	0.00259433	0.0069263
	ENSMUSG00000075010.7	AW112010	1.67921	6.07276	219.052	2.51257e-13	3.10757e-11
	ENSMUSG00000055546.7	Timd4	1.67327	1.38757	60.5381	6.39286e-08	8.38864e-07
	ENSMUSG00000026896.15	Ifih1	1.67249	6.22561	385.591	5.6279e-16	2.181e-13
	ENSMUSG00000050359.8	Sprr1a	1.67233	0.463711	29.5548	1.53424e-05	8.52902e-05
	ENSMUSG00000040328.17	Or2v1	1.6707	2.81685	54.0844	1.6471e-07	1.86397e-06
	ENSMUSG00000001943.9	Vsig2	0.12845	4.62773	5.38915	0.029372	0.0552734
	ENSMUSG00000118607.2	Gm7592	1.67043	1.18927	32.311	8.3505e-06	5.07933e-05
	ENSMUSG00000002307.17	Daxx	1.65348	5.89754	344.462	1.93651e-15	6.23454e-13
	ENSMUSG00000001962.9	Fam50a	0.0622893	4.96458	0.967278	0.335484	0.428671
	ENSMUSG00000118590.2	Gm15433	1.6525	-0.503853	16.5907	0.000460786	0.00157469
	ENSMUSG00000001983.8	Taco1	0.049184	3.03515	0.65773	0.425587	0.518319
	ENSMUSG00000001986.17	Gria3	0.0371775	4.16041	0.261438	0.613956	0.692499
	ENSMUSG00000072844.7	G530011O06Rik	1.65103	1.16959	10.8783	0.00311249	0.00808093
	ENSMUSG00000120976.1	ENSMUSG00000120976.1	1.64546	-0.150772	16.829	0.000428421	0.00148063
	ENSMUSG00000028766.11	Alpl	1.63743	2.91118	177.357	2.28028e-12	1.82412e-10
	ENSMUSG00000030895.10	Hpx	1.63472	1.11014	48.48	4.01031e-07	3.91797e-06
	ENSMUSG00000032515.9	Csrnp1	1.62537	5.35661	129.324	5.60047e-11	2.57017e-09
	ENSMUSG00000002010.18	Idh3g	0.0292499	6.35032	0.196859	0.66137	0.732573
	ENSMUSG00000056749.8	Nfil3	1.61952	3.65173	190.019	1.11535e-12	1.04013e-10
	ENSMUSG00000012705.17	Retn	1.6171	3.37103	7.47664	0.0117507	0.0252117
	ENSMUSG00000029378.6	Areg	1.59949	2.09219	66.0083	3.0328e-08	4.53205e-07
	ENSMUSG00000107379.2	Gm43126	1.5898	2.31835	77.5101	7.28054e-09	1.39369e-07
	ENSMUSG00000002020.16	Ltbp2	0.143104	7.26913	1.64	0.212953	0.295253
	ENSMUSG00000078921.4	Tgtp2	1.58688	7.38015	39.1955	2.07639e-06	1.55009e-05
	ENSMUSG00000024079.5	Eif2ak2	1.58098	5.64223	380.991	6.42114e-16	2.43431e-13
	ENSMUSG00000002032.18	Tmem25	-0.11679	1.54351	0.858251	0.363745	0.457872
	ENSMUSG00000002033.15	Cd3g	-0.136627	3.10151	0.769278	0.389413	0.483029
	ENSMUSG00000002043.18	Trappc6a	-0.104548	4.08068	2.26552	0.145746	0.21536
	ENSMUSG00000040152.9	Thbs1	1.57224	8.04624	81.7452	4.48668e-09	9.39826e-08
	ENSMUSG00000002055.10	Spag5	-0.417982	2.07666	3.01449	0.0957577	0.150919
	ENSMUSG00000001497.19	Pax9	1.57127	0.0571925	14.741	0.000824983	0.00259457
	ENSMUSG00000002059.19	Rab34	0.0741892	4.88423	1.87444	0.184049	0.261242
	ENSMUSG00000105504.5	Gbp5	1.56936	5.58181	41.0635	1.46286e-06	1.15225e-05
	ENSMUSG00000043939.17	A530064D06Rik	1.56769	1.20878	51.9606	2.28921e-07	2.45822e-06
	ENSMUSG00000034422.15	Parp14	1.5676	7.47512	262.211	3.70947e-14	6.16091e-12
	ENSMUSG00000002100.16	Mybpc3	0.00064944	4.04019	3.57425e-06	0.998508	0.999029
	ENSMUSG00000002102.16	Psmc3	0.0796811	6.68687	4.09494	0.0546524	0.0937337
	ENSMUSG00000060187.5	Lrrc10	1.56387	-0.0268368	15.5181	0.000643491	0.00209637
	ENSMUSG00000002104.12	Rapsn	-0.135392	0.722486	0.651375	0.4278	0.520277
	ENSMUSG00000002105.16	Slc39a13	-0.0299666	5.84489	0.445645	0.510982	0.598992
	ENSMUSG00000029195.11	Klb	1.5521	0.0473528	7.40245	0.0121213	0.0259112
	ENSMUSG00000021750.17	Fam107a	1.55042	4.30106	107.43	3.43832e-10	1.11867e-08
	ENSMUSG00000025610.8	Map3k7cl	1.54871	0.894349	62.0937	5.14588e-08	6.97529e-07
	ENSMUSG00000002111.9	Spi1	0.11403	5.23343	3.26915	0.0835478	0.134757
	ENSMUSG00000023067.15	Cdkn1a	1.54841	6.68991	259.14	4.20846e-14	6.85901e-12
	ENSMUSG00000002147.19	Stat6	0.0774844	7.53469	4.78722	0.0389751	0.0703828
	ENSMUSG00000020089.9	Ppa1	1.54722	4.24009	206.244	4.73701e-13	5.27089e-11
	ENSMUSG00000002205.17	Vrk3	0.0163992	5.27849	0.0713918	0.791677	0.839952
	ENSMUSG00000043263.14	Ifi209	1.54665	5.42789	117.012	1.50029e-10	5.77562e-09
	ENSMUSG00000095576.6	Fmo6	1.54496	0.202325	22.2158	9.26907e-05	0.000397549
	ENSMUSG00000002222.15	Rmnd5a	-0.145173	6.60882	5.46784	0.0283252	0.0535926
	ENSMUSG00000026475.8	Rgs16	1.53598	0.950572	45.5256	6.60032e-07	5.88461e-06
	ENSMUSG00000002228.8	Ppm1j	0.161987	2.06654	1.73266	0.2009	0.281098
	ENSMUSG00000120992.1	ENSMUSG00000120992.1	1.5358	6.9646	116.689	1.54132e-10	5.89791e-09
	ENSMUSG00000019082.19	Slc25a22	1.52472	5.64764	419.525	2.22249e-16	9.93793e-14
	ENSMUSG00000026285.9	Pdcd1	1.51687	0.192033	32.2445	8.47078e-06	5.14173e-05
	ENSMUSG00000002257.9	Def6	-0.0308002	3.98057	0.148072	0.703882	0.769466
	ENSMUSG00000002265.18	Peg3	-0.212051	4.31224	1.31904	0.262443	0.350896
	ENSMUSG00000002274.14	Metrn	-0.0385513	3.40341	0.209507	0.651403	0.724347
	ENSMUSG00000002279.20	Lmf1	0.108487	4.10971	4.43911	0.0461131	0.0811879
	ENSMUSG00000002280.12	Ciao3	-0.0428183	4.60718	0.652664	0.42735	0.519934
	ENSMUSG00000048636.8	A730049H05Rik	1.51125	0.137956	39.6873	1.89153e-06	1.42675e-05
	ENSMUSG00000002297.17	Dbf4	0.19941	2.78335	2.97549	0.0978044	0.153562
	ENSMUSG00000040296.16	Rigi	1.50263	6.90648	392.064	4.68655e-16	1.87778e-13
	ENSMUSG00000030935.16	Acsm3	1.5009	0.54754	5.94239	0.0228296	0.044613
	ENSMUSG00000035686.9	Thrsp	1.50048	5.45819	6.08958	0.0213749	0.0422148
	ENSMUSG00000030017.3	Reg3g	1.49242	6.11136	22.5821	8.41324e-05	0.000366732
	ENSMUSG00000002324.9	Rec8	-0.178226	3.38018	2.34434	0.139232	0.207244
	ENSMUSG00000006403.14	Adamts4	1.48963	1.36925	32.5675	7.90369e-06	4.84473e-05
	ENSMUSG00000002326.7	Gmpr2	0.118078	4.16834	4.73236	0.0400125	0.0720026
	ENSMUSG00000002329.8	Mdp1	0.0759117	5.16294	2.22135	0.149556	0.220075
	ENSMUSG00000002332.17	Dhrs1	-0.107507	5.58169	4.57139	0.0432403	0.0769144
	ENSMUSG00000002325.16	Irf9	1.47248	6.79257	490.873	3.8993e-17	2.87705e-14
	ENSMUSG00000062783.3	Csprs	1.46681	0.837206	23.6456	6.37988e-05	0.000288609
	ENSMUSG00000002345.19	Borcs8	0.0513097	4.02397	0.55901	0.462155	0.552741
	ENSMUSG00000056144.15	Trim34a	1.4658	6.09116	451.223	9.93131e-17	5.77307e-14
	ENSMUSG00000002365.11	Snx9	-0.0819053	6.09137	4.18509	0.0522545	0.0903317
	ENSMUSG00000056569.12	Mpz	1.46225	2.32987	15.7093	0.000605849	0.00198909
	ENSMUSG00000022596.4	Slurp1	1.46155	1.26327	46.0094	6.07408e-07	5.51198e-06
	ENSMUSG00000060969.10	Irx1	1.46031	6.39288	285.005	1.51404e-14	3.21991e-12
	ENSMUSG00000079012.12	Serpina3m	1.45117	0.928856	21.0354	0.00012739	0.000524695
	ENSMUSG00000002396.9	Ocel1	-0.0107331	5.13584	0.0332106	0.856976	0.891343
	ENSMUSG00000002409.19	Dyrk1b	-0.108686	4.68376	2.95094	0.0991187	0.155388
	ENSMUSG00000033006.11	Sox10	1.43523	-0.598694	12.2243	0.00192277	0.00537273
	ENSMUSG00000002416.14	Ndufb2	0.0344844	4.74695	0.293984	0.592838	0.673649
	ENSMUSG00000046593.4	Tmem215	1.43496	-0.623903	21.2188	0.000121177	0.00050159
	ENSMUSG00000002455.15	Prpf6	-0.105468	6.09942	5.54037	0.0273971	0.0520867
	ENSMUSG00000062380.5	Tubb3	1.43359	0.184353	15.6808	0.000611297	0.00200421
	ENSMUSG00000002475.17	Abhd3	-0.216503	2.71836	4.29071	0.0495951	0.0863959
	ENSMUSG00000002477.6	Snrpd1	0.0834521	4.24812	1.82162	0.190116	0.268456
	ENSMUSG00000038507.7	Parp12	1.43102	6.87571	345.697	1.86229e-15	6.23454e-13
	ENSMUSG00000036412.6	Arsi	1.42903	1.5018	57.9928	9.20039e-08	1.13389e-06
	ENSMUSG00000062007.14	Hsh2d	1.42478	2.28395	125.958	7.2722e-11	3.16259e-09
	ENSMUSG00000033860.14	Fgg	1.41388	-0.133913	19.9174	0.00017364	0.000683085
	ENSMUSG00000070501.15	Ifi214	1.41009	1.42465	59.914	6.98244e-08	9.06003e-07
	ENSMUSG00000020363.7	Gfpt2	1.40944	4.30905	202.068	5.86999e-13	6.24188e-11
	ENSMUSG00000010358.14	Ifi35	1.40628	6.25723	300.662	8.49585e-15	2.02958e-12
	ENSMUSG00000002565.17	Scin	0.549536	0.10721	5.03452	0.0346583	0.0637008
	ENSMUSG00000002578.19	Ikzf4	-0.014011	3.0268	0.00932871	0.923883	0.944353
	ENSMUSG00000026981.16	Il1rn	1.40293	3.90172	38.8302	2.2264e-06	1.6417e-05
	ENSMUSG00000023905.16	Tnfrsf12a	1.40023	4.80096	177.721	2.23241e-12	1.81074e-10
	ENSMUSG00000007682.9	Dio2	1.39647	1.14908	39.3254	2.02574e-06	1.51748e-05
	ENSMUSG00000094796.3	BC147527	1.39136	1.89987	76.7768	7.93365e-09	1.49946e-07
	ENSMUSG00000091144.3	Phf11c	1.3887	2.16103	102.47	5.41222e-10	1.62731e-08
	ENSMUSG00000002617.15	Zfp40	0.151623	3.45118	1.35854	0.255608	0.343444
	ENSMUSG00000001095.6	Slc13a2	1.38864	0.14912	36.5876	3.44926e-06	2.40031e-05
	ENSMUSG00000028270.13	Gbp2	1.38451	7.32318	63.688	4.13688e-08	5.86529e-07
	ENSMUSG00000002635.12	Pdcd2l	0.13894	3.46355	3.17522	0.0878292	0.140519
	ENSMUSG00000106734.5	Gm20559	1.38451	6.11812	231.369	1.40845e-13	1.94937e-11
	ENSMUSG00000002660.9	Clpp	0.104959	4.31837	3.09178	0.0918463	0.145849
	ENSMUSG00000002661.15	Alkbh7	0.0779135	2.97592	0.721794	0.404219	0.496981
	ENSMUSG00000035783.10	Acta2	1.37986	7.94335	193.863	9.05278e-13	8.86918e-11
	ENSMUSG00000002679.15	Med6	0.0773781	3.84477	1.41711	0.245892	0.333239
	ENSMUSG00000002688.9	Prkd1	-0.0245819	4.5797	0.160572	0.692289	0.759297
	ENSMUSG00000002699.14	Lcp2	0.124151	4.46488	2.25088	0.146996	0.216948
	ENSMUSG00000009185.3	Ccl8	1.3717	2.16973	21.7064	0.000106206	0.0004477
	ENSMUSG00000079419.5	Ms4a6c	1.36396	4.48447	74.6707	1.01905e-08	1.83397e-07
	ENSMUSG00000002731.7	Prkra	-0.0737241	3.87596	2.20864	0.150674	0.221508
	ENSMUSG00000002732.15	Fkbp7	-0.0114389	4.29915	0.0339925	0.855321	0.890239
	ENSMUSG00000039997.17	Ifi203	1.35706	6.75555	146.267	1.63317e-11	8.98449e-10
	ENSMUSG00000074170.6	Plekhf1	1.34979	3.22141	103.385	4.9709e-10	1.52423e-08
	ENSMUSG00000039699.15	Batf2	1.34516	3.36328	62.4031	4.93087e-08	6.77082e-07
	ENSMUSG00000020676.3	Ccl11	1.34357	2.42594	58.7815	8.20884e-08	1.0336e-06
	ENSMUSG00000002767.14	Mrpl2	0.0618013	4.33197	1.44196	0.241913	0.328818
	ENSMUSG00000099241.3	Gvin-ps2	1.34324	2.08339	8.04358	0.00929848	0.020662
	ENSMUSG00000002769.10	Gnmt	0.0188534	2.14655	0.0376334	0.847866	0.884629
	ENSMUSG00000002771.13	Grin2d	-0.0819366	2.61428	0.487154	0.492121	0.58105
	ENSMUSG00000002778.15	Kdelr1	0.0606714	6.81737	3.23594	0.0850335	0.136736
	ENSMUSG00000002781.20	Tmem143	0.116486	3.62301	1.22259	0.280163	0.369965
	ENSMUSG00000002797.10	Ggct	-0.186749	2.86166	3.24092	0.0848088	0.136412
	ENSMUSG00000026073.14	Il1r2	1.34238	0.0807051	37.2723	3.01236e-06	2.1251e-05
	ENSMUSG00000002803.15	Btbd6	-0.0275169	4.31572	0.148141	0.703816	0.769466
	ENSMUSG00000002804.5	Nudt14	-0.0594879	3.94456	1.30359	0.26518	0.353932
	ENSMUSG00000002808.8	Epdr1	0.0579853	4.22431	0.786469	0.384251	0.478127
	ENSMUSG00000002812.5	Flii	0.0133792	7.57134	0.121957	0.730065	0.789938
	ENSMUSG00000043613.9	Mmp3	1.34167	4.85686	86.0084	2.81065e-09	6.36337e-08
	ENSMUSG00000047735.15	Samd9l	1.34088	6.93546	211.295	3.67363e-13	4.41824e-11
	ENSMUSG00000002825.9	Qtrt1	0.109358	3.00144	2.46152	0.130176	0.1956
	ENSMUSG00000002831.15	Plin4	0.170674	5.06085	0.252251	0.620218	0.698031
	ENSMUSG00000069874.8	Irgm2	1.33792	7.50814	40.9692	1.48858e-06	1.16829e-05
	ENSMUSG00000026088.16	Mitd1	1.32255	4.11995	223.123	2.06847e-13	2.68536e-11
	ENSMUSG00000078349.5	AW011738	1.31868	4.46935	332.002	2.89438e-15	8.27461e-13
	ENSMUSG00000061517.9	Sox21	1.31649	0.368275	8.13676	0.00895234	0.0200308
	ENSMUSG00000028967.11	Errfi1	1.31295	7.53771	68.0868	2.31241e-08	3.62858e-07
	ENSMUSG00000100220.2	Gm29331	1.30665	1.32224	28.9131	1.7761e-05	9.68219e-05
	ENSMUSG00000038677.15	Scube3	1.30519	3.03002	97.6028	8.601e-10	2.40204e-08
	ENSMUSG00000002871.15	Tpra1	0.0841439	5.82235	5.41947	0.0289637	0.0546347
	ENSMUSG00000111254.2	Gm48717	1.30423	-0.54596	18.1689	0.000286928	0.0010501
	ENSMUSG00000002885.15	Adgre5	-0.0706837	9.61087	2.01668	0.168849	0.243091
	ENSMUSG00000002897.6	Il17ra	-0.104184	6.09909	2.36842	0.137311	0.2048
	ENSMUSG00000066363.13	Serpina3f	1.30406	3.10567	8.69692	0.00714834	0.016496
	ENSMUSG00000002908.18	Kcnn1	-0.402162	0.990627	3.39355	0.0782421	0.127496
	ENSMUSG00000067212.9	H2-T23	1.30337	8.51863	113.448	2.02838e-10	7.32359e-09
	ENSMUSG00000002944.16	Cd36	0.114827	10.0273	3.08674	0.0920957	0.146138
	ENSMUSG00000002948.20	Map2k7	-0.0727904	6.47597	5.59028	0.0267782	0.0510666
	ENSMUSG00000002949.16	Timm44	-0.100987	5.24772	4.80964	0.0385598	0.0697702
	ENSMUSG00000002957.12	Ap2a2	-0.0715269	6.92447	2.53645	0.124749	0.188682
	ENSMUSG00000002963.18	Pnkp	0.0502519	4.92795	0.868808	0.360864	0.455164
	ENSMUSG00000095620.8	Csta2	1.30209	-0.435592	21.9741	9.8854e-05	0.000419955
	ENSMUSG00000115338.3	Pnp	1.30178	6.56476	220.906	2.2986e-13	2.89677e-11
	ENSMUSG00000002847.8	Pla1a	1.29863	0.439096	17.493	0.0003506	0.00124625
	ENSMUSG00000026222.17	Sp100	1.29466	7.50684	271.847	2.5184e-14	4.73377e-12
	ENSMUSG00000026628.14	Atf3	1.2928	4.49274	19.1742	0.00021437	0.000816601
	ENSMUSG00000002985.17	Apoe	0.0053646	9.26919	0.00413087	0.949303	0.96311
	ENSMUSG00000015437.6	Gzmb	1.28938	3.45708	39.0996	2.11469e-06	1.57531e-05
	ENSMUSG00000002996.18	Hbp1	-0.0374242	6.66317	0.665722	0.422827	0.515595
	ENSMUSG00000002997.16	Prkar2b	0.156255	4.63036	0.702828	0.410371	0.503126
	ENSMUSG00000003031.15	Cdkn1b	-0.164392	6.27353	5.31106	0.0304537	0.0570873
	ENSMUSG00000031762.8	Mt2	1.28721	3.40943	26.3538	3.24709e-05	0.000162066
	ENSMUSG00000053175.18	Bcl3	1.28416	4.54003	154.064	9.65175e-12	5.86465e-10
	ENSMUSG00000097820.4	E530011L22Rik	1.28085	3.92115	115.892	1.64808e-10	6.23446e-09
	ENSMUSG00000003038.16	Hmgn2	0.0588676	6.70016	0.895728	0.353662	0.44773
	ENSMUSG00000003039.10	Fam32a	0.0842261	6.80641	3.14916	0.0890618	0.142165
	ENSMUSG00000027827.18	Kcnab1	1.28039	0.121864	23.4609	6.69057e-05	0.000300714
	ENSMUSG00000003062.14	Stard3nl	0.0719668	5.44967	3.08248	0.0923068	0.146406
	ENSMUSG00000079457.12	Gm7609	1.27933	-0.194477	11.7488	0.00227375	0.00619948
	ENSMUSG00000003070.7	Efna2	-0.122456	1.2339	0.53749	0.470802	0.561198
	ENSMUSG00000121301.1	ENSMUSG00000121301.1	1.27733	-0.274171	12.1419	0.00197908	0.00550275
	ENSMUSG00000107451.2	Gm44421	1.27353	0.480443	31.3039	1.03901e-05	6.1028e-05
	ENSMUSG00000053835.18	H2-T24	1.27186	5.43374	163.156	5.3786e-12	3.67833e-10
	ENSMUSG00000108801.3	Gm39090	1.26986	0.0594496	47.8625	4.44263e-07	4.26016e-06
	ENSMUSG00000060519.12	Tor3a	1.26967	6.93312	439.05	1.34433e-16	7.10416e-14
	ENSMUSG00000003134.11	Tbc1d8	0.0598909	5.8892	0.957073	0.337995	0.431153
	ENSMUSG00000003135.16	Cnot11	0.0991549	4.91602	4.49907	0.044785	0.0792532
	ENSMUSG00000022014.16	Epsti1	1.26943	4.0572	145.352	1.73985e-11	9.42274e-10
	ENSMUSG00000075602.11	Ly6a	1.26883	9.30099	155.483	8.7928e-12	5.48749e-10
	ENSMUSG00000031821.12	Gins2	1.26622	5.25507	152.146	1.09606e-11	6.49062e-10
	ENSMUSG00000003166.21	Dgcr2	0.0377755	7.00373	0.888998	0.355443	0.449695
	ENSMUSG00000068417.9	Pnp2	1.26516	0.971461	41.3451	1.38888e-06	1.10194e-05
	ENSMUSG00000003190.13	Bcl2l12	-0.0564611	3.88043	1.09135	0.306913	0.3985
	ENSMUSG00000063268.13	Parp10	1.26324	6.14956	210.228	3.87455e-13	4.59649e-11
	ENSMUSG00000073144.6	4930599N23Rik	1.26131	0.0706517	32.0239	8.8835e-06	5.34758e-05
	ENSMUSG00000012428.10	Steap4	1.25535	4.73768	80.8621	4.95501e-09	1.02019e-07
	ENSMUSG00000003206.8	Ebi3	-0.0855384	1.73231	0.465897	0.501625	0.589795
	ENSMUSG00000003208.10	Yju2	-0.061489	3.6637	0.994543	0.3289	0.422022
	ENSMUSG00000003226.8	Ranbp2	0.0262477	6.65859	0.190294	0.666696	0.737208
	ENSMUSG00000003227.5	Edar	-0.205067	1.08792	1.50037	0.232879	0.318599
	ENSMUSG00000003228.10	Grk5	-0.0366678	6.87462	0.867146	0.361315	0.455536
	ENSMUSG00000003233.13	Dvl3	-0.0324942	5.86643	0.667241	0.422306	0.515151
	ENSMUSG00000003234.17	Abcf3	-0.0175196	5.60081	0.172745	0.681495	0.749485
	ENSMUSG00000066000.13	Zfp979	1.25458	1.14075	15.1841	0.000715508	0.0022937
	ENSMUSG00000063600.15	Egfem1	1.25194	0.170312	25.7396	3.77142e-05	0.000184384
	ENSMUSG00000027570.16	Col9a3	1.24471	0.349506	44.0989	8.46262e-07	7.25711e-06
	ENSMUSG00000003273.15	Car11	-0.459815	1.14838	3.68995	0.0670856	0.11184
	ENSMUSG00000016496.8	Cd274	1.24393	5.91027	42.9977	1.02904e-06	8.54954e-06
	ENSMUSG00000037447.17	Arid5a	1.24217	5.07073	142.787	2.08169e-11	1.10008e-09
	ENSMUSG00000021453.3	Gadd45g	1.2415	4.59192	91.6741	1.5522e-09	3.88921e-08
	ENSMUSG00000118671.1	Eppk1	1.23835	2.66555	78.5557	6.44813e-09	1.26917e-07
	ENSMUSG00000003309.15	Ap1m2	0.0320583	4.60997	0.510917	0.481858	0.571563
	ENSMUSG00000028862.7	Map3k6	1.23591	5.21504	106.551	3.72125e-10	1.19954e-08
	ENSMUSG00000026358.14	Rgs1	1.23445	2.16074	14.0642	0.00102914	0.00313213
	ENSMUSG00000003345.17	Csnk1g2	0.06758	7.06004	2.66184	0.116254	0.177869
	ENSMUSG00000022587.16	Ly6e	1.23236	10.7695	278.949	1.90834e-14	3.87216e-12
	ENSMUSG00000012519.15	Mlkl	1.23125	3.52833	87.1226	2.49485e-09	5.75278e-08
	ENSMUSG00000028072.7	Ntrk1	1.23096	-0.498101	27.6893	2.36062e-05	0.000122813
	ENSMUSG00000074874.11	Ctla2b	1.23049	3.06759	92.3855	1.44373e-09	3.68088e-08
	ENSMUSG00000003355.8	Fkbp11	-0.0789183	2.06094	0.246696	0.624075	0.701285
	ENSMUSG00000003360.16	Ddx23	-0.0547257	6.65639	3.74327	0.0652776	0.109165
	ENSMUSG00000050370.6	Ch25h	1.23047	3.2981	22.5995	8.37472e-05	0.000365482
	ENSMUSG00000003378.10	Grik5	-0.057269	4.62416	0.727947	0.402253	0.495123
	ENSMUSG00000003379.8	Cd79a	-0.377909	5.62941	4.64324	0.0417647	0.074632
	ENSMUSG00000081076.4	Rpsa-ps4	1.22462	0.308975	33.851	6.02567e-06	3.86045e-05
	ENSMUSG00000029380.12	Cxcl1	1.22231	0.610375	7.49457	0.011663	0.0250451
	ENSMUSG00000024677.14	Ms4a6b	1.21665	4.98163	77.1094	7.62981e-09	1.45258e-07
	ENSMUSG00000003411.11	Rab3b	0.12647	-0.215878	0.332079	0.569974	0.653331
	ENSMUSG00000003418.12	St8sia6	0.189587	2.44882	1.34679	0.257617	0.345637
	ENSMUSG00000003420.9	Fcgrt	-0.0992635	6.61552	2.84065	0.105283	0.163595
	ENSMUSG00000003421.14	Nosip	0.0790988	5.6339	3.13819	0.0895864	0.142858
	ENSMUSG00000101859.2	Gm29233	1.21021	-0.438195	11.6804	0.00232979	0.0063305
	ENSMUSG00000063975.14	Slco1a5	1.2083	1.51359	43.7057	9.07119e-07	7.6718e-06
	ENSMUSG00000003435.10	Supt5	0.0299286	7.19248	0.688267	0.415191	0.507971
	ENSMUSG00000005640.12	Insrr	1.20193	-0.4386	16.8081	0.000431159	0.00148773
	ENSMUSG00000027555.9	Car13	1.1989	2.4586	58.2352	8.88242e-08	1.103e-06
	ENSMUSG00000020953.18	Coch	1.19596	-0.3702	13.0892	0.00142678	0.00415315
	ENSMUSG00000003452.16	Bicd1	0.106886	1.7397	0.718141	0.405393	0.498108
	ENSMUSG00000071552.6	Tigit	1.19472	-0.460413	13.5071	0.00123885	0.00367108
	ENSMUSG00000003464.14	Pex19	0.0280855	6.37509	0.614352	0.441066	0.532559
	ENSMUSG00000003469.10	Phyhip	0.13723	0.533603	0.422847	0.521894	0.608987
	ENSMUSG00000003476.17	Crhr2	0.479763	0.0680392	2.8533	0.104554	0.162593
	ENSMUSG00000072620.4	Slfn2	1.1937	6.02996	120.672	1.10948e-10	4.48913e-09
	ENSMUSG00000003484.5	Cyp4f18	-0.0908448	3.66493	0.806768	0.378285	0.472456
	ENSMUSG00000024109.19	Nrxn1	1.18568	0.728477	8.119	0.0090172	0.0201471
	ENSMUSG00000094974.2	Rps19-ps2	1.18427	1.319	43.8946	8.77298e-07	7.47031e-06
	ENSMUSG00000003526.13	Prodh	-0.10937	4.51552	2.07448	0.163111	0.236214
	ENSMUSG00000096681.2	Rps19-ps1	1.18427	1.319	43.8946	8.77298e-07	7.47031e-06
	ENSMUSG00000049502.18	Dtx3l	1.17993	6.20515	181.225	1.82416e-12	1.5294e-10
	ENSMUSG00000003531.16	Dgcr6	0.101652	4.67917	2.77062	0.109429	0.168893
	ENSMUSG00000121499.1	ENSMUSG00000121499.1	1.17756	1.30832	22.6849	8.1888e-05	0.000358535
	ENSMUSG00000036986.17	Pml	1.17612	6.45416	455.453	8.95561e-17	5.57775e-14
	ENSMUSG00000003545.4	Fosb	-0.775141	4.62099	1.5606	0.224007	0.308153
	ENSMUSG00000003546.11	Klc4	0.00515921	5.02355	0.0122661	0.912763	0.935619
	ENSMUSG00000003549.10	Ercc1	0.0537617	4.20369	1.33776	0.259174	0.347379
	ENSMUSG00000003559.9	As3mt	-0.0649687	4.65527	1.34757	0.257484	0.345511
	ENSMUSG00000003573.16	Homer3	0.108683	5.65051	1.50923	0.231546	0.317074
	ENSMUSG00000027951.17	Adar	1.17405	6.86358	453.691	9.34878e-17	5.62184e-14
	ENSMUSG00000003581.15	Rnf215	0.0838951	5.91769	3.68745	0.0671718	0.111947
	ENSMUSG00000003585.14	Sec14l2	0.114288	4.30877	2.4885	0.128191	0.193066
	ENSMUSG00000022602.15	Arc	1.16503	0.931217	28.0162	2.18634e-05	0.000115259
	ENSMUSG00000030693.11	Klk10	1.16434	-0.274665	19.0588	0.00022158	0.000839301
	ENSMUSG00000029657.16	Hsph1	1.16342	5.96773	77.2753	7.483e-09	1.42931e-07
	ENSMUSG00000003644.18	Rps6ka1	-0.018146	6.50407	0.21035	0.650751	0.723938
	ENSMUSG00000042726.15	Trafd1	1.1617	7.21054	269.837	2.72742e-14	4.90346e-12
	ENSMUSG00000039501.15	Znfx1	1.15679	7.42714	196.882	7.70461e-13	7.82482e-11
	ENSMUSG00000078606.9	Gvin2	1.15131	6.40968	28.8273	1.81147e-05	9.85653e-05
	ENSMUSG00000003680.17	Taf6l	0.111526	2.64802	1.49677	0.233423	0.319268
	ENSMUSG00000121501.1	ENSMUSG00000121501.1	1.14727	5.00717	60.1515	6.75141e-08	8.80612e-07
	ENSMUSG00000038305.16	Spats2l	1.1471	4.84743	335.061	2.61904e-15	7.74127e-13
	ENSMUSG00000003746.17	Man1a	0.0333507	5.75662	0.204136	0.655589	0.727695
	ENSMUSG00000029366.11	Dck	1.14647	4.08646	131.393	4.78357e-11	2.28943e-09
	ENSMUSG00000003762.14	Coq8b	0.0245442	5.0128	0.1423	0.709427	0.773376
	ENSMUSG00000025279.8	Dnase1l3	1.14645	2.00039	41.7681	1.28531e-06	1.0334e-05
	ENSMUSG00000003779.17	Kif20a	-0.3552	2.52472	1.63985	0.212973	0.295257
	ENSMUSG00000003808.19	Farsa	0.113179	4.90973	5.10919	0.0334623	0.0618503
	ENSMUSG00000046694.7	Tent5b	1.14558	4.19764	90.8458	1.68979e-09	4.16807e-08
	ENSMUSG00000003810.15	Mast2	0.00133781	5.92665	0.000872003	0.976694	0.982817
	ENSMUSG00000105338.2	Gm43802	1.14486	3.30086	35.614	4.1935e-06	2.83562e-05
	ENSMUSG00000005483.11	Dnajb1	1.14416	5.84577	119.861	1.18537e-10	4.74122e-09
	ENSMUSG00000044701.6	Il27	1.13932	-0.526035	14.8065	0.000807721	0.00254671
	ENSMUSG00000003824.13	Syce2	-0.150786	1.41443	1.20592	0.283383	0.373115
	ENSMUSG00000003847.17	Nfat5	-0.0955137	7.13297	1.58903	0.219968	0.303291
	ENSMUSG00000091269.3	Gm6682	1.13727	2.99749	65.1688	3.39007e-08	4.96802e-07
	ENSMUSG00000111118.2	Gm6545	1.13671	-0.131773	25.9382	3.59242e-05	0.000176872
	ENSMUSG00000003863.19	Ppfia3	0.287305	-0.133428	2.85948	0.13892	0.206849
	ENSMUSG00000063626.7	Unc5d	1.13523	-0.233689	18.3683	0.000270646	0.000999111
	ENSMUSG00000095366.3	Gm21860	1.13412	2.10624	11.5629	0.00242955	0.00654953
	ENSMUSG00000026621.14	Mtarc1	1.13189	-0.036163	8.12616	0.00899098	0.0200992
	ENSMUSG00000057143.16	Trim12c	1.13169	5.84996	255.399	4.91695e-14	7.79515e-12
	ENSMUSG00000003923.15	Tfam	-0.0973966	4.78513	4.11538	0.054098	0.0928924
	ENSMUSG00000003929.12	Zfp81	-0.028613	3.42075	0.143204	0.708549	0.772958
	ENSMUSG00000031070.16	Mrgprf	1.12932	2.43861	65.5475	3.22357e-08	4.76002e-07
	ENSMUSG00000049401.11	Ogfr	1.12647	6.19842	364.053	1.05746e-15	3.8419e-13
	ENSMUSG00000029322.13	Plac8	1.1208	5.80843	51.0439	2.64652e-07	2.7686e-06
	ENSMUSG00000003955.9	Fam162a	-0.0378682	4.40319	0.380199	0.543487	0.629257
	ENSMUSG00000003970.10	Rpl8	0.000931309	8.64095	0.000472392	0.982845	0.987261
	ENSMUSG00000003992.16	Ssbp2	0.0344734	3.92338	0.188691	0.668013	0.73801
	ENSMUSG00000004018.10	Fancl	0.0361716	2.57205	0.092382	0.763874	0.817502
	ENSMUSG00000004032.11	Gstm5	-0.0918911	3.02371	1.03425	0.319628	0.411577
	ENSMUSG00000004035.13	Gstm7	0.210032	2.64903	2.11359	0.159362	0.231903
	ENSMUSG00000006344.18	Ggt5	1.12007	4.20036	195.145	8.45119e-13	8.42173e-11
	ENSMUSG00000004043.15	Stat5a	-0.0440074	4.75886	0.537055	0.47098	0.561364
	ENSMUSG00000004044.10	Cavin1	0.00372105	9.36016	0.00966456	0.92253	0.94319
	ENSMUSG00000042622.15	Maff	1.11886	4.55573	214.013	3.21131e-13	3.88903e-11
	ENSMUSG00000058883.17	Zfp708	1.11642	0.976895	10.1948	0.00400996	0.0100517
	ENSMUSG00000042510.8	AA986860	1.11627	6.6555	260.568	3.96789e-14	6.52793e-12
	ENSMUSG00000004070.16	Hmox2	0.110622	5.75437	5.51527	0.0277145	0.0525968
	ENSMUSG00000004071.14	Cdip1	0.0361017	6.40869	0.763973	0.391027	0.484415
	ENSMUSG00000004085.15	Map3k20	-0.040522	6.36922	1.26946	0.271362	0.3605
	ENSMUSG00000004096.10	Cwc15	0.019377	5.65932	0.172292	0.681888	0.749871
	ENSMUSG00000004098.8	Col5a3	0.299824	3.42044	5.01552	0.0349702	0.0642077
	ENSMUSG00000040016.17	Ptger3	1.11586	1.50607	12.7907	0.00158005	0.00453722
	ENSMUSG00000037321.18	Tap1	1.1151	7.20988	53.2029	1.88609e-07	2.09101e-06
	ENSMUSG00000029780.15	Nt5c3	1.11504	4.52232	154.38	9.45277e-12	5.80166e-10
	ENSMUSG00000093979.9	Gm2237	1.1144	-0.19202	26.507	3.12907e-05	0.000157166
	ENSMUSG00000004113.19	Cacna1b	-0.383347	0.682375	1.95954	0.174764	0.25012
	ENSMUSG00000004127.13	Trmt10a	0.0641467	2.35021	0.338367	0.566371	0.650139
	ENSMUSG00000004151.18	Etv1	-0.112928	3.75224	1.8402	0.187954	0.265898
	ENSMUSG00000083019.3	Gm6222	1.11425	0.0354069	28.4198	1.99022e-05	0.000106628
	ENSMUSG00000020572.9	Nampt	1.11041	6.45341	237.598	1.06231e-13	1.50615e-11
	ENSMUSG00000004221.17	Ikbkg	0.065346	5.68299	0.965138	0.336008	0.429184
	ENSMUSG00000090272.10	Mndal	1.10704	6.38098	113.398	2.03703e-10	7.33962e-09
	ENSMUSG00000048368.10	Omd	1.10697	0.735161	19.7413	0.000182463	0.00071153
	ENSMUSG00000118385.2	Gm50311	1.1069	-0.288579	10.9566	0.0030247	0.00789047
	ENSMUSG00000004266.16	Ptpn6	0.0356666	6.10275	0.212915	0.64878	0.722252
	ENSMUSG00000004267.17	Eno2	0.219816	2.40182	4.77715	0.0391632	0.070653
	ENSMUSG00000036912.19	Piwil4	1.10664	2.63997	61.567	5.53568e-08	7.4259e-07
	ENSMUSG00000104420.2	E230020A03Rik	1.10532	-0.62021	14.2234	0.000976592	0.00299732
	ENSMUSG00000004285.13	Atp6v1f	0.104794	5.87916	4.30098	0.0493449	0.0860268
	ENSMUSG00000003051.14	Elf3	1.10507	4.85677	183.836	1.5728e-12	1.33795e-10
	ENSMUSG00000101628.2	Gm28177	1.10465	1.31053	15.9274	0.00056582	0.00187307
	ENSMUSG00000045868.13	Gvin1	1.09757	6.60947	22.7965	7.95242e-05	0.000349678
	ENSMUSG00000004328.16	Hif3a	0.239748	2.25749	1.5949	0.219146	0.302349
	ENSMUSG00000004347.18	Pde1c	-0.35464	0.452655	1.37387	0.253018	0.340803
	ENSMUSG00000004356.9	Utp20	-0.0380735	4.24716	0.300866	0.588569	0.670065
	ENSMUSG00000004359.17	Spic	-0.434431	0.128473	2.64649	0.117257	0.179136
	ENSMUSG00000107222.2	Gm43198	1.09373	1.4155	31.0843	1.09032e-05	6.34863e-05
	ENSMUSG00000004296.15	Il12b	1.09229	0.436856	11.625	0.00237621	0.00643158
	ENSMUSG00000004371.16	Il11	0.314491	-0.335594	2.6829	0.133938	0.200493
	ENSMUSG00000004383.19	Large1	-0.058754	4.77876	1.13378	0.297904	0.388916
	ENSMUSG00000024222.18	Fkbp5	1.09163	4.68143	65.393	3.29041e-08	4.84232e-07
	ENSMUSG00000019326.15	Aoc3	1.0886	4.82303	10.3538	0.00377834	0.00955904
	ENSMUSG00000004415.16	Col26a1	-0.422783	-0.0851989	3.2954	0.0823948	0.133255
	ENSMUSG00000021091.9	Serpina3n	1.08812	7.24422	65.8941	3.07892e-08	4.57485e-07
	ENSMUSG00000004451.15	Ralb	-0.0363388	6.34949	0.582321	0.453077	0.544161
	ENSMUSG00000025981.14	Coq10b	1.08688	4.66151	88.1363	2.24082e-09	5.29508e-08
	ENSMUSG00000030966.14	Trim21	1.08414	5.19448	159.787	6.65699e-12	4.3808e-10
	ENSMUSG00000004462.8	Tbccd1	-0.0393587	4.07478	0.760384	0.398409	0.491466
	ENSMUSG00000004473.11	Clec11a	0.225964	3.2439	2.12858	0.157952	0.230197
	ENSMUSG00000091639.3	Gm3756	1.08361	-0.483159	11.1359	0.0028336	0.00747017
	ENSMUSG00000098934.2	Gvin-ps4	1.08144	2.21424	12.7619	0.00159575	0.00457928
	ENSMUSG00000101939.2	Gm28438	1.08045	6.86248	32.0534	8.82703e-06	5.32277e-05
	ENSMUSG00000078502.11	Zfp268	1.07674	1.09018	9.25361	0.00574404	0.0136832
	ENSMUSG00000004540.8	Psg17	0.229413	-0.369134	0.811754	0.37684	0.471023
	ENSMUSG00000030087.12	Klf15	1.07558	5.69892	72.154	1.38443e-08	2.35313e-07
	ENSMUSG00000004558.16	Ndrg2	0.188104	6.7694	5.0046	0.035151	0.0644991
	ENSMUSG00000004561.15	Mettl17	-0.0973668	4.17981	3.1332	0.089826	0.143138
	ENSMUSG00000004562.17	Arhgef40	-0.0967071	5.86328	2.55975	0.123117	0.186602
	ENSMUSG00000060680.3	Gm8894	1.07309	0.0431214	28.7775	1.83234e-05	9.94835e-05
	ENSMUSG00000075122.6	Cd80	1.07023	1.68934	59.9528	6.94414e-08	9.02102e-07
	ENSMUSG00000073598.4	Smim33	1.06797	-0.54755	13.6431	0.00118367	0.00352494
	ENSMUSG00000004591.17	Pkn2	0.0203399	5.89629	0.111371	0.74158	0.799284
	ENSMUSG00000004609.12	Cd33	-0.181029	4.0575	4.49898	0.044787	0.0792532
	ENSMUSG00000004610.5	Etfb	0.00234838	5.99328	0.00101909	0.974806	0.981447
	ENSMUSG00000028655.12	Mfsd2a	1.0674	2.66128	19.8578	0.000176571	0.000692582
	ENSMUSG00000004626.15	Stxbp2	-0.0232818	6.16362	0.561856	0.461031	0.551731
	ENSMUSG00000004631.16	Sgce	0.00683513	5.90622	0.0142659	0.905953	0.930388
	ENSMUSG00000004633.18	Chn2	-0.186379	3.41427	4.68839	0.0408665	0.0732824
	ENSMUSG00000004637.16	Wwox	-0.146717	3.54975	3.14247	0.0893812	0.142583
	ENSMUSG00000023176.10	Cpn2	1.06675	-0.554345	17.1253	0.000391583	0.00137042
	ENSMUSG00000033538.14	Casp4	1.06451	3.98376	54.5873	1.52565e-07	1.74579e-06
	ENSMUSG00000002289.17	Angptl4	1.06446	5.95756	23.257	7.05291e-05	0.00031497
	ENSMUSG00000097440.3	Gm6277	1.06346	1.91248	61.6511	5.47129e-08	7.36787e-07
	ENSMUSG00000004667.19	Polr2e	0.0258241	5.86874	0.384809	0.541074	0.627087
	ENSMUSG00000020411.3	Nipal4	1.06335	-0.604513	13.1531	0.00139611	0.00407205
	ENSMUSG00000004698.12	Hdac9	-0.110419	3.17738	1.24194	0.276484	0.365966
	ENSMUSG00000004707.15	Ly9	-0.0513632	3.6791	0.214326	0.647701	0.721327
	ENSMUSG00000034575.14	ENSMUSG00000034575.14	1.06332	5.14357	353.34	1.46642e-15	5.01428e-13
	ENSMUSG00000004730.16	Adgre1	0.0885739	4.80289	0.971308	0.334499	0.427632
	ENSMUSG00000004748.6	Mtfp1	0.177048	2.23056	2.05953	0.164573	0.237995
	ENSMUSG00000004768.15	Rab23	-0.145123	4.66652	5.08687	0.0338149	0.0624086
	ENSMUSG00000097194.4	9330175E14Rik	1.06145	3.16026	28.9813	1.74853e-05	9.5558e-05
	ENSMUSG00000026237.7	Nmur1	1.06071	0.171371	27.2634	2.61077e-05	0.000134304
	ENSMUSG00000037362.9	Ccn3	1.05958	3.5593	93.3444	1.31034e-09	3.42716e-08
	ENSMUSG00000004791.8	Pgf	0.252153	2.57799	2.90295	0.101748	0.158774
	ENSMUSG00000004798.15	Ulk2	0.0214493	6.03725	0.12671	0.725077	0.786308
	ENSMUSG00000004814.11	Ccl24	-0.1786	-0.00430888	0.32576	0.573642	0.656327
	ENSMUSG00000083261.5	Gm7816	1.05894	3.67115	72.4557	1.33393e-08	2.28511e-07
	ENSMUSG00000041324.15	Inhba	1.05616	0.78801	27.7719	2.31522e-05	0.000121028
	ENSMUSG00000057135.13	Scimp	1.05582	2.08775	55.1663	1.39774e-07	1.62285e-06
	ENSMUSG00000044313.14	Mab21l3	1.05538	-0.0567011	11.4886	0.00249504	0.00669193
	ENSMUSG00000020464.16	Pnpt1	1.05006	4.32682	137.208	3.10525e-11	1.58341e-09
	ENSMUSG00000004864.14	Mapk13	0.137301	3.52019	2.95245	0.0990371	0.155302
	ENSMUSG00000004865.17	Srpk1	0.0626777	6.02021	2.50281	0.127152	0.191751
	ENSMUSG00000004880.12	Lbr	0.0600088	6.14341	2.5104	0.126605	0.191107
	ENSMUSG00000004891.17	Nes	0.151903	7.60574	3.32209	0.0812409	0.131657
	ENSMUSG00000002227.16	Mov10	1.04706	5.25342	206.899	4.58178e-13	5.18842e-11
	ENSMUSG00000030747.6	Dgat2	1.045	5.26986	7.2582	0.0128795	0.0272778
	ENSMUSG00000042357.3	Gjb5	1.04496	-0.434989	22.3393	8.97031e-05	0.000386828
	ENSMUSG00000037997.13	Parp11	1.04197	4.84206	162.366	5.65228e-12	3.80579e-10
	ENSMUSG00000066677.13	Ifi208	1.04183	5.77909	257.802	4.44829e-14	7.18275e-12
	ENSMUSG00000004929.13	Thop1	0.120019	4.26926	4.41314	0.046702	0.0820756
	ENSMUSG00000025329.4	Padi1	1.04179	0.142911	7.68978	0.0107537	0.0234092
	ENSMUSG00000101438.4	Gm19412	1.04074	2.38426	46.4909	5.59538e-07	5.16177e-06
	ENSMUSG00000066170.9	E230001N04Rik	1.03361	-0.43257	14.5187	0.000886701	0.00276523
	ENSMUSG00000025044.17	Msr1	1.03163	2.11337	29.7015	1.48412e-05	8.30337e-05
	ENSMUSG00000109610.2	Gm7432	1.03131	1.28995	15.6823	0.000611015	0.00200366
	ENSMUSG00000059031.4	Or5p58	1.0301	-0.216243	19.7824	0.00018036	0.000704434
	ENSMUSG00000070803.7	Cited4	1.02906	1.06567	31.4958	9.96302e-06	5.90167e-05
	ENSMUSG00000056116.19	H2-T22	1.02881	7.16785	68.1402	2.29653e-08	3.6113e-07
	ENSMUSG00000093651.2	Gm5873	1.02703	0.0798609	29.5766	1.52666e-05	8.49414e-05
	ENSMUSG00000031891.7	Hsd11b2	1.02641	0.573396	23.6481	6.37585e-05	0.000288538
	ENSMUSG00000068428.8	Gmnc	1.02276	1.34833	45.8054	6.29021e-07	5.64856e-06
	ENSMUSG00000004994.13	Ccdc130	0.0543106	3.64409	0.893976	0.354125	0.448217
	ENSMUSG00000037580.11	Gch1	1.02248	4.39001	103.091	5.10831e-10	1.54929e-08
	ENSMUSG00000005034.16	Prkacb	-0.0465086	6.67515	2.02458	0.168051	0.242262
	ENSMUSG00000024678.7	Ms4a4d	1.0219	5.4822	129.235	5.63876e-11	2.58028e-09
	ENSMUSG00000030376.9	Slc8a2	1.01836	0.223821	43.0508	1.01931e-06	8.47672e-06
	ENSMUSG00000005054.8	Cstb	0.0622683	5.17636	1.09987	0.305074	0.396732
	ENSMUSG00000102917.2	Gm37724	1.01814	-0.218538	35.3656	4.41022e-06	2.95807e-05
	ENSMUSG00000025321.15	Itgb8	1.01189	0.192879	19.6328	0.000188143	0.000730903
	ENSMUSG00000005078.17	Jkamp	0.0292896	4.70599	0.383906	0.541545	0.62755
	ENSMUSG00000001473.8	Tubb6	1.01172	4.87944	129.204	5.65209e-11	2.58028e-09
	ENSMUSG00000005089.16	Slc1a2	0.116404	2.06165	0.558716	0.462271	0.552842
	ENSMUSG00000028214.14	Gem	1.00752	4.5619	190.714	1.07376e-12	1.01768e-10
	ENSMUSG00000019905.9	Gprc6a	1.00583	2.19539	40.8916	1.51012e-06	1.18094e-05
	ENSMUSG00000031609.4	Sap30	1.00136	2.56893	91.4324	1.59105e-09	3.98082e-08
	ENSMUSG00000005124.11	Ccn4	-0.151073	2.89504	0.340306	0.565269	0.649389
	ENSMUSG00000024338.16	Psmb8	1.00099	6.95622	67.7978	2.40035e-08	3.73413e-07
	ENSMUSG00000005131.5	4930550C14Rik	-0.0774582	1.21068	0.280517	0.601384	0.681451
	ENSMUSG00000023019.13	Gpd1	0.997905	6.18831	7.24783	0.012936	0.0273875
	ENSMUSG00000050747.15	Trim15	0.996519	0.345005	23.4819	6.65456e-05	0.000299327
	ENSMUSG00000005150.17	Wdr83	0.0447775	4.24554	0.748087	0.395918	0.48919
	ENSMUSG00000037379.8	Spon2	0.995501	5.36891	17.1671	0.000386672	0.0013575
	ENSMUSG00000018566.15	Slc2a4	0.993471	3.83144	10.3088	0.0038424	0.00969576
	ENSMUSG00000036040.15	Adamtsl2	0.992105	6.55299	50.7247	2.78484e-07	2.88732e-06
	ENSMUSG00000005220.11	Corin	0.0805846	2.27396	0.0823846	0.776634	0.828109
	ENSMUSG00000032596.15	Uba7	0.990677	7.10151	164.983	4.799e-12	3.37459e-10
	ENSMUSG00000005233.17	Spc25	0.0145414	1.93251	0.0141084	0.906471	0.930755
	ENSMUSG00000072109.13	A530040E14Rik	0.98957	1.51598	23.951	5.89995e-05	0.000270619
	ENSMUSG00000036766.13	Dner	0.986951	-0.315086	12.4952	0.00174969	0.00494617
	ENSMUSG00000005262.14	Ufd1	0.0687693	5.65685	3.10845	0.0910268	0.144736
	ENSMUSG00000039760.9	Il22ra2	0.984695	0.165515	14.178	0.000991274	0.00303384
	ENSMUSG00000005268.21	Prlr	0.341698	-0.277555	1.33303	0.259995	0.348292
	ENSMUSG00000042901.11	Aida	0.98248	6.13084	171.502	3.2234e-12	2.47634e-10
	ENSMUSG00000043740.16	B430306N03Rik	0.98235	2.3527	35.9746	3.89924e-06	2.66349e-05
	ENSMUSG00000005320.10	Fgfr4	0.0751535	5.51707	1.00641	0.32609	0.418785
	ENSMUSG00000005667.9	Mthfd2	0.982342	2.92717	41.6074	1.32363e-06	1.05982e-05
	ENSMUSG00000026573.8	Xcl1	0.980779	-0.421981	13.0614	0.00144035	0.00418748
	ENSMUSG00000005360.15	Slc1a3	-0.0139326	5.59541	0.0545718	0.817335	0.860356
	ENSMUSG00000005362.15	Crbn	0.0826918	4.90232	2.05619	0.164901	0.238351
	ENSMUSG00000121353.1	ENSMUSG00000121353.1	0.975331	-0.34891	12.9714	0.00148522	0.00430103
	ENSMUSG00000005370.5	Msh6	-0.138584	4.73692	4.80242	0.038693	0.0699749
	ENSMUSG00000089844.8	A530032D15Rik	0.973242	0.438463	9.12645	0.00603577	0.0142878
	ENSMUSG00000005373.14	Mlxipl	0.489107	3.28351	1.9765	0.172983	0.248162
	ENSMUSG00000005374.14	Tbl2	-0.0200065	4.82134	0.173278	0.681032	0.749118
	ENSMUSG00000005378.18	Bud23	0.0455661	4.47251	0.56543	0.459625	0.550471
	ENSMUSG00000005397.9	Nid1	0.0560202	7.50912	0.344173	0.563083	0.647304
	ENSMUSG00000050830.18	Vwc2	0.973234	0.0111382	15.1885	0.00071452	0.00229138
	ENSMUSG00000005413.9	Hmox1	0.191772	5.38982	2.74507	0.110989	0.170938
	ENSMUSG00000087684.2	1200007C13Rik	0.973024	0.743337	16.2023	0.000519413	0.0017416
	ENSMUSG00000005442.14	Cic	0.0465083	7.55667	1.08613	0.308045	0.399822
	ENSMUSG00000005447.13	Pafah1b3	0.043505	3.52898	0.385151	0.540895	0.626922
	ENSMUSG00000005465.10	Il27ra	-0.109931	3.52438	0.931312	0.344453	0.438013
	ENSMUSG00000005469.11	Prkaca	0.0624669	6.47328	2.20079	0.151369	0.222256
	ENSMUSG00000005470.9	Asf1b	0.298818	2.28232	2.66002	0.116372	0.178034
	ENSMUSG00000005481.19	Ddx39a	0.116534	5.96325	3.73619	0.0655145	0.109488
	ENSMUSG00000028480.15	Glipr2	0.972827	5.20914	102.087	5.60942e-10	1.67792e-08
	ENSMUSG00000066258.14	Trim12a	0.972134	5.45803	181.078	1.83956e-12	1.53493e-10
	ENSMUSG00000005505.13	Kbtbd4	0.0970639	4.3963	3.3524	0.079953	0.12984
	ENSMUSG00000005506.17	Celf1	-0.093554	6.74035	5.19545	0.0321379	0.0597116
	ENSMUSG00000005510.10	Ndufs3	0.0154148	5.50172	0.0714971	0.791527	0.839952
	ENSMUSG00000005514.15	Por	-0.0419882	8.29957	0.797126	0.381102	0.475192
	ENSMUSG00000107023.3	Gm42715	0.966785	5.7015	85.7512	2.88956e-09	6.50208e-08
	ENSMUSG00000100862.2	Gm10925	0.965655	11.1102	20.5205	0.000146764	0.000592458
	ENSMUSG00000022769.10	Sdf2l1	0.965087	4.20157	105.816	3.97736e-10	1.27035e-08
	ENSMUSG00000005547.15	Cyp2a5	0.0168685	5.83518	0.00137241	0.970764	0.978204
	ENSMUSG00000031202.6	Rab39b	0.964422	-0.270984	9.25303	0.00574534	0.0136838
	ENSMUSG00000044501.18	Zfp758	0.962614	2.97737	16.8143	0.000430343	0.00148609
	ENSMUSG00000072944.12	Nup62cl	0.962155	-0.084477	15.4338	0.000660892	0.00214664
	ENSMUSG00000026417.14	Pigr	0.960922	6.9842	25.2661	4.23847e-05	0.000203622
	ENSMUSG00000005609.17	Ctr9	-0.0372931	5.55636	1.44002	0.242221	0.329159
	ENSMUSG00000097572.4	Gm26797	0.960422	2.06421	53.8252	1.71375e-07	1.93313e-06
	ENSMUSG00000070436.13	Serpinh1	0.960201	8.44781	78.0253	6.85662e-09	1.33452e-07
	ENSMUSG00000121057.1	ENSMUSG00000121057.1	0.959314	0.671384	30.5338	1.23149e-05	7.06375e-05
	ENSMUSG00000022346.18	Myc	0.958997	3.63015	61.3911	5.67284e-08	7.58073e-07
	ENSMUSG00000022901.14	Cd86	0.957116	3.26415	73.6547	1.15211e-08	2.02741e-07
	ENSMUSG00000005628.13	Tmod4	-0.0971572	0.249321	0.23338	0.633546	0.709733
	ENSMUSG00000118157.2	Gm9902	0.956107	0.420366	44.1435	8.39643e-07	7.21694e-06
	ENSMUSG00000032265.15	Tent5a	0.955475	4.51448	65.9595	3.05244e-08	4.55749e-07
	ENSMUSG00000081058.6	H3c15	0.954648	1.13575	27.0754	2.73025e-05	0.000139504
	ENSMUSG00000027368.7	Dusp2	0.95464	2.33036	44.0977	8.46434e-07	7.25711e-06
	ENSMUSG00000074482.6	Gm16589	0.954536	2.71739	96.8878	9.22123e-10	2.52052e-08
	ENSMUSG00000001670.14	Tat	0.953976	-0.160769	10.8461	0.00314944	0.00816699
	ENSMUSG00000010311.16	Optc	0.953851	-0.174436	19.8596	0.000176481	0.000692387
	ENSMUSG00000031897.10	Psmb10	0.953612	6.10766	177.622	2.2454e-12	1.81284e-10
	ENSMUSG00000041984.3	Rptn	0.953409	1.22321	26.8454	2.88453e-05	0.000146231
	ENSMUSG00000045092.9	S1pr1	0.95327	8.6152	371.345	8.50857e-16	3.15704e-13
	ENSMUSG00000005696.12	Sh2d1a	0.0850921	0.387543	0.0978138	0.757257	0.812615
	ENSMUSG00000120390.1	ENSMUSG00000120390.1	0.952424	1.42185	43.8818	8.79296e-07	7.48367e-06
	ENSMUSG00000005699.17	Pard6a	0.177051	2.59224	5.14087	0.0329689	0.0610605
	ENSMUSG00000000567.6	Sox9	0.951484	-0.56382	8.57408	0.00750667	0.0172158
	ENSMUSG00000035517.18	Tdrd7	0.951078	6.0973	275.235	2.20436e-14	4.36839e-12
	ENSMUSG00000028410.14	Dnaja1	0.950669	7.05026	155.991	8.50541e-12	5.43318e-10
	ENSMUSG00000005763.16	Cd247	-0.143603	3.91369	1.92596	0.178358	0.254448
	ENSMUSG00000058927.7	Gm10053	0.948998	4.04402	72.5203	1.32337e-08	2.27264e-07
	ENSMUSG00000026620.12	Mark1	0.94811	2.94825	100.295	6.64191e-10	1.94669e-08
	ENSMUSG00000005800.4	Mmp8	0.161387	2.04221	1.06529	0.312628	0.404434
	ENSMUSG00000005802.13	Slc30a4	0.186454	4.66717	4.23562	0.0509626	0.0884139
	ENSMUSG00000005803.15	Sqor	-0.0802421	5.86709	1.70146	0.204862	0.285921
	ENSMUSG00000004951.11	Hspb1	0.947223	6.91635	61.9517	5.24794e-08	7.08899e-07
	ENSMUSG00000071005.8	Ccl19	0.946992	2.31302	22.4654	8.67607e-05	0.000376467
	ENSMUSG00000085334.8	Gm12940	0.94663	3.12311	32.4838	8.04651e-06	4.92189e-05
	ENSMUSG00000005824.8	Tnfsf14	0.00462853	1.55661	0.0007328	0.978635	0.984279
	ENSMUSG00000005836.11	Gata6	-0.0405741	5.47923	0.626721	0.436563	0.528329
	ENSMUSG00000024308.16	Tapbp	0.943995	8.60393	195.255	8.40156e-13	8.42039e-11
	ENSMUSG00000005864.8	Cnga2	0.445745	0.976167	3.64109	0.0687926	0.114343
	ENSMUSG00000046275.3	Trarg1	0.942997	4.45651	83.6596	3.62829e-09	7.90922e-08
	ENSMUSG00000000791.10	Il12rb1	0.941825	1.18581	37.4899	2.88642e-06	2.04702e-05
	ENSMUSG00000037887.12	Dusp8	0.938159	5.40276	88.0108	2.27068e-09	5.34392e-08
	ENSMUSG00000005882.19	Uqcc1	0.0392512	5.1637	0.546117	0.467304	0.557828
	ENSMUSG00000117284.2	Gm7072	0.93756	3.50943	13.0314	0.00145514	0.00422513
	ENSMUSG00000052485.8	Tmem171	0.935568	1.99925	42.0629	1.21811e-06	9.90792e-06
	ENSMUSG00000005897.15	Nr2c1	-0.0853235	4.36267	2.23572	0.148303	0.218499
	ENSMUSG00000005899.15	Smpd4	0.0283734	5.46913	0.768382	0.389685	0.483234
	ENSMUSG00000030124.3	Lag3	0.934837	2.23269	20.3099	0.000155595	0.000621487
	ENSMUSG00000005917.16	Otx1	-0.359086	1.04629	1.34998	0.25707	0.345035
	ENSMUSG00000037816.11	Fbxw17	0.932525	4.35011	134.237	3.86449e-11	1.91457e-09
	ENSMUSG00000029664.11	Tfpi2	0.931375	0.573359	19.7167	0.000183733	0.000716003
	ENSMUSG00000005949.10	Ctns	-0.0624415	4.72814	2.0025	0.170294	0.244827
	ENSMUSG00000001750.17	Tcirg1	0.928404	6.76252	206.337	4.71465e-13	5.27089e-11
	ENSMUSG00000005951.14	Shpk	-0.200953	2.96458	4.03798	0.0562317	0.096036
	ENSMUSG00000020155.3	Kcnmb1	0.928026	2.89294	128.533	5.95175e-11	2.68893e-09
	ENSMUSG00000003032.9	Klf4	0.92729	7.20603	115.285	1.7346e-10	6.47743e-09
	ENSMUSG00000054676.18	1600014C10Rik	0.925463	5.01813	149.31	1.3263e-11	7.60831e-10
	ENSMUSG00000030669.14	Calca	0.924767	-0.28392	9.51195	0.00519788	0.0125653
	ENSMUSG00000005981.12	Trap1	0.0536361	6.01737	1.61147	0.216845	0.299767
	ENSMUSG00000094942.8	Gm3604	0.924225	0.508477	14.2355	0.00097271	0.00298909
	ENSMUSG00000005983.16	1700037C18Rik	-0.120184	2.60807	1.2811	0.269234	0.358382
	ENSMUSG00000007659.19	Bcl2l1	0.923671	7.20848	206.209	4.74528e-13	5.27089e-11
	ENSMUSG00000006418.18	Rnf114	0.919885	7.10733	244.96	7.67703e-14	1.14166e-11
	ENSMUSG00000006010.15	Odr4	0.0991872	5.54611	4.97037	0.0357241	0.0653786
	ENSMUSG00000006014.17	Prg4	1.43214	2.07566	5.3293	0.0301971	0.056661
	ENSMUSG00000006019.16	Dhx34	-0.0434675	4.46254	0.436663	0.515232	0.602827
	ENSMUSG00000006021.6	Kptn	-0.0758167	3.82783	1.90686	0.180442	0.256914
	ENSMUSG00000063889.17	Crem	0.918633	3.78406	150.027	1.26354e-11	7.29629e-10
	ENSMUSG00000020181.19	Nav3	0.917701	0.354476	14.0857	0.00102189	0.00311496
	ENSMUSG00000024786.10	Majin	0.91672	-0.463855	19.1907	0.000213362	0.000813696
	ENSMUSG00000080845.2	Gm9115	0.916024	-0.0989356	9.99074	0.0043303	0.0107267
	ENSMUSG00000006058.11	Snf8	0.0808042	5.01606	3.96157	0.0584322	0.0993661
	ENSMUSG00000026946.10	Nmi	0.911252	4.78388	220.813	2.30891e-13	2.89677e-11
	ENSMUSG00000071267.12	Zfp942	0.911044	3.27519	15.6356	0.00062006	0.00202913
	ENSMUSG00000006134.5	Crkl	0.0210894	6.18752	0.32305	0.575229	0.657885
	ENSMUSG00000006154.14	Eps8l1	-0.238504	5.61975	4.09231	0.0547241	0.0938473
	ENSMUSG00000006169.21	Clint1	0.0571309	6.79309	2.3987	0.134941	0.201838
	ENSMUSG00000006191.18	Cdkal1	-0.099295	3.69746	2.1755	0.153637	0.224961
	ENSMUSG00000006205.14	Htra1	0.111055	5.8086	3.46596	0.0753322	0.123528
	ENSMUSG00000049303.11	Syt12	0.909659	0.829851	26.7102	2.97964e-05	0.000150568
	ENSMUSG00000006218.5	Fam131c	-0.0715178	0.157565	0.104709	0.749143	0.805593
	ENSMUSG00000068631.9	Gm7676	0.908895	0.293012	17.8982	0.000310774	0.0011223
	ENSMUSG00000006221.8	Hspb7	0.25602	5.21384	1.25586	0.273878	0.36304
	ENSMUSG00000023087.16	Noct	0.908808	4.07017	88.0741	2.25558e-09	5.32274e-08
	ENSMUSG00000024371.15	C2	0.907494	5.89199	67.1878	2.59819e-08	4.00263e-07
	ENSMUSG00000006262.16	Mob1b	0.0383099	5.49453	0.201513	0.657658	0.729481
	ENSMUSG00000107952.2	Gm6352	0.904855	-0.296795	7.9925	0.00949447	0.0210304
	ENSMUSG00000066443.6	Gm10163	0.904836	4.2124	38.1309	2.5475e-06	1.8434e-05
	ENSMUSG00000006276.11	Eps15l1	0.0237235	6.12741	0.521007	0.477609	0.567953
	ENSMUSG00000056025.13	Clca3a1	0.901357	1.98435	18.9013	0.00023185	0.00087327
	ENSMUSG00000064357.1	mt-Atp6	0.900599	6.84401	10.3549	0.00377678	0.00955691
	ENSMUSG00000006289.15	Osgep	0.0948591	5.04461	4.43767	0.0461454	0.0812285
	ENSMUSG00000032085.6	Tagln	0.899759	7.45974	227.471	1.68636e-13	2.26218e-11
	ENSMUSG00000006301.18	Tmbim1	0.0805961	7.91447	4.18276	0.0523149	0.0904272
	ENSMUSG00000039238.7	Zfp750	0.898519	2.91212	89.4699	1.94851e-09	4.7129e-08
	ENSMUSG00000121484.1	ENSMUSG00000121484.1	0.898327	2.07797	14.5771	0.000870005	0.00272031
	ENSMUSG00000006310.11	Zbtb32	-0.00138927	1.92565	6.87213e-05	0.993456	0.995226
	ENSMUSG00000025647.17	Shisa5	0.897563	8.72885	267.25	3.02461e-14	5.27461e-12
	ENSMUSG00000022180.8	Slc7a8	0.896438	3.14823	45.9026	6.18624e-07	5.58843e-06
	ENSMUSG00000006333.15	Rps9	-0.0792399	8.7263	3.5754	0.0711663	0.117827
	ENSMUSG00000006335.17	Tfpt	-0.11103	3.45343	3.0601	0.0934264	0.147792
	ENSMUSG00000006342.16	Susd2	-0.0497135	4.20839	0.330377	0.570958	0.654144
	ENSMUSG00000027322.12	Siglec1	0.896104	4.71944	54.7147	1.49645e-07	1.71801e-06
	ENSMUSG00000006345.11	Ggt1	-0.444671	1.33453	3.07077	0.0928908	0.147079
	ENSMUSG00000021388.15	Aspn	0.895134	3.45076	40.8556	1.52022e-06	1.18831e-05
	ENSMUSG00000006360.12	Crip1	0.147827	6.74876	5.41072	0.0290808	0.0548201
	ENSMUSG00000006362.17	Cbfa2t3	0.0460467	7.04207	0.431538	0.517685	0.60516
	ENSMUSG00000021130.9	Galnt16	0.894913	2.65822	58.2615	8.84876e-08	1.10145e-06
	ENSMUSG00000006373.11	Pgrmc1	0.00216977	7.68541	0.00176021	0.966893	0.975759
	ENSMUSG00000109168.2	Gm44709	0.894845	1.78393	12.5796	0.00169924	0.00482703
	ENSMUSG00000074771.11	Ankef1	0.894481	1.17809	7.53849	0.0114513	0.0246755
	ENSMUSG00000006389.14	Mpl	-0.612661	0.235788	3.13427	0.0897746	0.143093
	ENSMUSG00000006390.16	Elovl1	-0.0531951	8.72202	0.943085	0.34148	0.43474
	ENSMUSG00000053318.8	Slamf8	0.893192	2.42899	23.6595	6.35715e-05	0.000287879
	ENSMUSG00000006395.18	Hyi	-0.123451	4.18992	4.66379	0.0413531	0.0740103
	ENSMUSG00000006398.16	Cdc20	-0.327178	2.88249	2.23635	0.148248	0.218446
	ENSMUSG00000028965.14	Tnfrsf9	0.888526	1.18916	12.2573	0.00190075	0.00532142
	ENSMUSG00000006411.13	Nectin4	0.0637567	4.55782	1.07791	0.309842	0.401466
	ENSMUSG00000006412.11	Pfdn2	0.0784783	5.07998	3.94056	0.0590542	0.100279
	ENSMUSG00000039911.14	Spsb1	0.888321	5.06252	130.628	5.06949e-11	2.35752e-09
	ENSMUSG00000006423.16	Steep1	0.0883607	5.82472	2.07738	0.16283	0.235925
	ENSMUSG00000006435.17	Neurl1a	-0.192997	3.19146	2.68357	0.114851	0.176016
	ENSMUSG00000037890.14	Wdr19	0.887477	5.05874	196.85	7.71759e-13	7.82482e-11
	ENSMUSG00000034947.14	Tmem106a	0.887435	5.0285	70.9632	1.60504e-08	2.68363e-07
	ENSMUSG00000032719.5	Sbspon	0.885806	0.586118	10.9118	0.00307462	0.00800274
	ENSMUSG00000006462.8	A530013C23Rik	-0.487881	-0.174958	2.98433	0.0973357	0.15295
	ENSMUSG00000006463.14	Zdhhc24	0.000905635	4.19021	0.00020541	0.988687	0.991872
	ENSMUSG00000053101.4	Gpr141	0.881697	2.5669	22.077	9.61776e-05	0.000409983
	ENSMUSG00000021322.9	Aoah	0.881279	1.55931	40.0858	1.75483e-06	1.33736e-05
	ENSMUSG00000050503.10	Fbxl22	0.880144	1.86416	53.4228	1.82315e-07	2.02767e-06
	ENSMUSG00000029581.15	Fscn1	0.877215	4.65796	54.4451	1.55897e-07	1.77945e-06
	ENSMUSG00000036905.9	C1qb	0.876314	5.72797	39.2147	2.06882e-06	1.54709e-05
	ENSMUSG00000006517.6	Mvd	0.140734	3.71988	1.92919	0.178009	0.254034
	ENSMUSG00000017929.14	B4galt5	0.875963	5.76474	112.258	2.24725e-10	7.94924e-09
	ENSMUSG00000006522.18	Itih3	0.225572	1.36259	1.52777	0.228789	0.313816
	ENSMUSG00000006526.14	Stimate	0.042073	5.60608	0.705312	0.409557	0.502305
	ENSMUSG00000006527.17	Sfmbt1	-0.000777024	4.29179	0.000130713	0.990976	0.993596
	ENSMUSG00000006529.17	Itih1	0.108189	1.29117	0.817	0.375329	0.469369
	ENSMUSG00000006542.14	Prkag3	-0.173452	2.7995	2.46419	0.129978	0.195319
	ENSMUSG00000001506.11	Col1a1	0.872764	8.37452	32.3765	8.2339e-06	5.01715e-05
	ENSMUSG00000006574.16	Slc4a1	0.256377	0.866969	0.640195	0.43174	0.523665
	ENSMUSG00000006575.15	Rundc3a	0.14275	1.12896	0.740946	0.398147	0.491317
	ENSMUSG00000006576.17	Slc4a3	-0.0688347	4.94527	1.09925	0.305208	0.396877
	ENSMUSG00000032508.9	Myd88	0.872426	6.09957	174.78	2.65216e-12	2.09281e-10
	ENSMUSG00000026208.10	Des	0.872099	7.35965	117.719	1.41444e-10	5.53057e-09
	ENSMUSG00000006587.7	Snai3	-0.14469	-0.302741	0.295044	0.592176	0.673204
	ENSMUSG00000120133.1	ENSMUSG00000120133.1	0.870624	-0.357728	15.2254	0.000706149	0.00227038
	ENSMUSG00000006599.14	Gtf2h1	0.0244977	5.00556	0.27463	0.605203	0.6848
	ENSMUSG00000006611.16	Hfe	0.00449189	5.80491	0.0169718	0.897469	0.923614
	ENSMUSG00000006638.17	Abhd1	-0.305246	1.235	4.29244	0.049553	0.0863377
	ENSMUSG00000006641.13	Slc5a6	-0.1142	3.25667	0.849537	0.366149	0.46007
	ENSMUSG00000006642.4	Tcf23	-0.0708639	2.36439	0.116526	0.735899	0.794731
	ENSMUSG00000006649.18	Nphs1	-0.00188533	4.97417	0.000896924	0.976364	0.982561
	ENSMUSG00000029675.13	Eln	0.868843	8.21329	7.2472	0.0129394	0.0273914
	ENSMUSG00000050075.9	Gpr171	0.867709	2.26973	28.7589	1.8402e-05	9.98481e-05
	ENSMUSG00000027238.18	Frmd5	0.866914	2.47327	25.3623	4.13867e-05	0.000199652
	ENSMUSG00000006676.18	Usp19	-0.00695265	7.52443	0.0562991	0.814522	0.857912
	ENSMUSG00000006678.7	Pola1	-0.068641	2.90708	0.391003	0.537862	0.62423
	ENSMUSG00000022018.8	Rgcc	0.865302	5.91734	56.9436	1.07265e-07	1.29633e-06
	ENSMUSG00000006705.14	Pknox1	-0.10834	5.06259	4.21712	0.0514313	0.0890675
	ENSMUSG00000121463.1	Ccl19-ps2	0.86431	2.07469	22.8291	7.88479e-05	0.000347493
	ENSMUSG00000039853.19	Trim14	0.863588	3.53244	91.0853	1.6487e-09	4.09569e-08
	ENSMUSG00000048458.9	Inka2	0.8602	4.9701	156.871	8.03193e-12	5.17909e-10
	ENSMUSG00000006720.17	Zfp184	-0.253702	1.54618	3.85588	0.0616389	0.104056
	ENSMUSG00000006728.13	Cdk4	0.000892831	6.60323	0.000826969	0.977304	0.983175
	ENSMUSG00000006731.11	B4galnt1	0.0574053	6.59357	0.95995	0.337285	0.430404
	ENSMUSG00000006732.15	Mettl1	0.125166	3.4594	2.10433	0.160241	0.232831
	ENSMUSG00000051116.7	Gm8121	0.85921	1.18625	18.3355	0.000273256	0.00100661
	ENSMUSG00000031551.13	Ido1	0.857489	1.30653	8.83103	0.00677846	0.0157592
	ENSMUSG00000006763.15	Saal1	-0.12576	3.42557	3.45921	0.0755981	0.123917
	ENSMUSG00000037944.9	Ccr7	0.856427	4.27859	64.3479	3.78406e-08	5.45661e-07
	ENSMUSG00000067818.7	Myl9	0.854761	6.64008	83.9951	3.4971e-09	7.65194e-08
	ENSMUSG00000039682.13	Lap3	0.852417	5.469	154.011	9.6853e-12	5.86465e-10
	ENSMUSG00000035237.8	Lcat	0.84964	1.03819	40.9341	1.49828e-06	1.17432e-05
	ENSMUSG00000018500.3	Adora2b	0.849287	3.59677	69.3377	1.97008e-08	3.20787e-07
	ENSMUSG00000006850.9	Tmco6	-0.127337	3.90406	3.83783	0.0622062	0.104813
	ENSMUSG00000006906.11	Stambp	0.0511854	4.7503	1.01922	0.323094	0.415366
	ENSMUSG00000047945.7	Marcksl1	0.847703	4.7648	160.761	6.25662e-12	4.13293e-10
	ENSMUSG00000015652.10	Steap1	0.847504	0.441251	14.2222	0.000976973	0.00299796
	ENSMUSG00000006931.16	P3h4	-0.0317885	4.64866	0.216031	0.646404	0.720343
	ENSMUSG00000070034.14	Sp110	0.846616	6.04393	81.1547	4.79421e-09	9.90594e-08
	ENSMUSG00000015656.18	Hspa8	0.846193	10.202	73.8835	1.12058e-08	1.98394e-07
	ENSMUSG00000006958.15	Chrd	-0.0382465	2.09668	0.120508	0.731607	0.791077
	ENSMUSG00000117310.3	ENSMUSG00000117310.3	0.84228	6.4804	105.402	4.1304e-10	1.30253e-08
	ENSMUSG00000096006.2	Gm21596	0.838818	2.52819	25.5139	3.98665e-05	0.000193335
	ENSMUSG00000007030.9	Vwa7	-0.0976791	2.66868	0.791323	0.382812	0.476847
	ENSMUSG00000007033.5	Hspa1l	0.103597	1.56485	0.345534	0.562318	0.646553
	ENSMUSG00000101389.2	Ms4a4a	0.838224	1.33949	20.9804	0.000129319	0.000531511
	ENSMUSG00000109953.2	5430430B14Rik	0.838126	0.839858	21.23	0.00012081	0.000500428
	ENSMUSG00000091523.2	AU040972	0.836195	4.99923	19.9042	0.000174282	0.000685146
	ENSMUSG00000031639.13	Tlr3	0.834455	5.42837	79.5838	5.72961e-09	1.14454e-07
	ENSMUSG00000058672.8	Tubb2a	0.83442	6.7098	64.344	3.78606e-08	5.45661e-07
	ENSMUSG00000022440.10	C1qtnf6	0.831433	4.13924	35.715	4.10872e-06	2.79019e-05
	ENSMUSG00000045827.11	Serpinb9	0.83143	7.18913	136.741	3.21296e-11	1.6288e-09
	ENSMUSG00000007080.15	Pole	-0.3948	1.99717	5.60831	0.0265585	0.050701
	ENSMUSG00000007097.15	Atp1a2	-0.174671	7.40397	4.34896	0.048194	0.0843323
	ENSMUSG00000007122.12	Casq1	0.0347691	0.270275	0.0265358	0.872006	0.903632
	ENSMUSG00000068699.13	Flnc	0.830893	4.08091	30.4552	1.25322e-05	7.15849e-05
	ENSMUSG00000007216.7	Zfp775	-0.04565	3.22971	0.340083	0.565395	0.649476
	ENSMUSG00000032502.9	Stac	0.82926	-0.235173	12.6397	0.00166435	0.00474878
	ENSMUSG00000007338.11	Mrpl49	0.0614034	4.89365	1.24825	0.275299	0.36473
	ENSMUSG00000024014.9	Pim1	0.828142	5.95359	57.1547	1.03987e-07	1.26196e-06
	ENSMUSG00000062593.18	Gm49339	0.828101	3.76725	19.8341	0.000177753	0.000695965
	ENSMUSG00000058914.13	C1qtnf3	0.827545	1.38452	15.9479	0.000562209	0.00186292
	ENSMUSG00000101013.2	A630072M18Rik	0.827293	3.20878	25.5764	3.92577e-05	0.000190754
	ENSMUSG00000054200.8	Ffar4	0.826977	3.7209	84.2485	3.40145e-09	7.452e-08
	ENSMUSG00000023903.9	Mmp25	0.825452	2.39842	20.471	0.000148789	0.000598693
	ENSMUSG00000018143.11	Mafk	0.823715	6.65739	207.395	4.46802e-13	5.09267e-11
	ENSMUSG00000030043.12	Tacr1	0.822393	0.645621	11.6334	0.0023691	0.00641731
	ENSMUSG00000007591.16	Tssk4	-0.14229	0.112349	0.418204	0.524168	0.611149
	ENSMUSG00000052353.14	Cemip	0.821904	0.291407	9.57892	0.0050658	0.0122783
	ENSMUSG00000007610.16	Gtpbp3	-0.0359003	4.48613	0.322383	0.575621	0.65816
	ENSMUSG00000007613.16	Tgfbr1	0.0288605	5.56785	0.129881	0.721809	0.783836
	ENSMUSG00000071072.13	Ptges3	0.821723	6.38149	91.9145	1.5146e-09	3.82798e-08
	ENSMUSG00000007646.14	Rad51c	0.142485	0.972137	0.782784	0.385349	0.479117
	ENSMUSG00000080893.2	Ndufa12-ps	0.82123	2.71587	66.0387	3.02067e-08	4.52556e-07
	ENSMUSG00000097000.4	Gm17435	0.820075	0.213179	20.101	0.000164929	0.000653828
	ENSMUSG00000079197.11	Psme2	0.818632	6.31982	144.221	1.88237e-11	1.01005e-09
	ENSMUSG00000104291.2	A130071D04Rik	0.817267	-0.0168444	15.6021	0.00062665	0.00204685
	ENSMUSG00000031779.4	Ccl22	0.816522	4.40167	18.095	0.000293236	0.0010687
	ENSMUSG00000109408.2	A930037H05Rik	0.815837	2.58504	42.5265	1.12002e-06	9.20019e-06
	ENSMUSG00000089809.10	Rasgef1b	0.815391	5.34295	163.437	5.2847e-12	3.65714e-10
	ENSMUSG00000039531.9	Zup1	0.814595	4.03794	144.452	1.85234e-11	9.98387e-10
	ENSMUSG00000007783.11	Cpt1c	0.0953049	3.3885	1.34463	0.257988	0.346081
	ENSMUSG00000027068.7	Dhrs9	0.812424	0.559896	12.3333	0.00185099	0.00519963
	ENSMUSG00000007812.17	Zfp655	0.0999015	5.1649	4.22979	0.0511097	0.0886251
	ENSMUSG00000021136.14	Smoc1	0.812161	3.25073	9.81377	0.00463091	0.0113632
	ENSMUSG00000076441.10	Ass1	0.81176	4.69034	63.7516	4.10136e-08	5.81966e-07
	ENSMUSG00000049939.7	Lrrc4	0.811302	0.329453	14.4049	0.000920216	0.00285076
	ENSMUSG00000007833.16	Aldh16a1	0.0393296	4.94551	0.828198	0.372132	0.466174
	ENSMUSG00000048450.11	Msx1	0.810983	2.02781	21.4711	0.000113163	0.000473137
	ENSMUSG00000007837.12	Prrg2	0.137252	4.22871	4.59894	0.0426676	0.0760586
	ENSMUSG00000007850.17	Hnrnph1	0.0801315	8.17299	3.25094	0.0843588	0.135788
	ENSMUSG00000007867.10	Ift43	0.000524006	4.74965	7.73322e-05	0.993059	0.995056
	ENSMUSG00000050565.17	Tor1aip2	0.80986	7.20267	193.934	9.01827e-13	8.86918e-11
	ENSMUSG00000007877.3	Tcap	-0.4978	5.21145	4.49384	0.0448991	0.0794383
	ENSMUSG00000008384.9	Sertad1	0.808577	4.73072	128.162	6.12492e-11	2.76001e-09
	ENSMUSG00000007888.16	Crlf1	0.0740164	4.33464	0.90826	0.35038	0.444188
	ENSMUSG00000007891.17	Ctsd	0.079168	9.42832	2.27342	0.145077	0.214425
	ENSMUSG00000007892.9	Rplp1	0.0692661	8.81396	1.64383	0.212437	0.294702
	ENSMUSG00000028633.8	Ctps	0.808159	5.334	97.7674	8.4647e-10	2.37707e-08
	ENSMUSG00000007950.10	Abhd8	0.0915659	4.52678	2.05737	0.164785	0.238243
	ENSMUSG00000007987.13	Ift22	0.0837952	4.43182	2.73101	0.111858	0.172065
	ENSMUSG00000095609.3	ENSMUSG00000095609.3	0.808041	2.57635	24.5034	5.12868e-05	0.000239462
	ENSMUSG00000021464.16	Ror2	0.807317	2.16901	60.6666	6.27834e-08	8.26324e-07
	ENSMUSG00000038264.9	Sema7a	0.806336	6.68838	107.644	3.3728e-10	1.10147e-08
	ENSMUSG00000034266.7	Batf	0.806134	2.57344	65.4384	3.27062e-08	4.81726e-07
	ENSMUSG00000008129.15	Brme1	-0.458806	0.10222	3.9005	0.0602613	0.102029
	ENSMUSG00000008136.15	Fhl2	0.430269	3.16809	4.79951	0.0387468	0.0700504
	ENSMUSG00000058260.3	Serpina9	0.806037	2.63465	11.3755	0.0025985	0.00693266
	ENSMUSG00000008153.13	Clstn3	0.86213	1.742	4.94736	0.0361153	0.06597
	ENSMUSG00000008167.15	Fbxw9	0.11594	4.30087	2.34286	0.139351	0.207368
	ENSMUSG00000032724.6	Abtb2	0.805794	3.6649	122.513	9.56031e-11	3.96015e-09
	ENSMUSG00000008200.16	Fnbp4	0.0524302	6.54525	1.32092	0.262112	0.350508
	ENSMUSG00000047822.9	Angptl8	0.804628	0.773545	20.724	0.00013875	0.000564944
	ENSMUSG00000008226.15	Scrn3	-0.0258326	4.76913	0.273648	0.605845	0.685259
	ENSMUSG00000008301.12	Phax	-0.07663	4.89542	2.24608	0.147408	0.217391
	ENSMUSG00000052736.16	Klrc2	0.804445	0.488061	10.0133	0.00429361	0.010654
	ENSMUSG00000120461.1	ENSMUSG00000120461.1	0.80327	1.87245	21.5291	0.000111403	0.000467122
	ENSMUSG00000008318.11	Relt	0.0770237	3.0882	0.62584	0.436881	0.528591
	ENSMUSG00000008333.13	Snrpb2	0.129933	4.46791	3.94579	0.0588985	0.100061
	ENSMUSG00000083283.4	Gm15361	0.802133	0.887254	27.5349	2.44817e-05	0.000126876
	ENSMUSG00000008373.17	Prpf31	0.0901871	5.04764	3.50311	0.0738876	0.121594
	ENSMUSG00000116972.2	Gm6278	0.801532	2.14967	17.6881	0.000330767	0.00118347
	ENSMUSG00000081249.4	Gm11517	0.801375	-0.492837	8.50471	0.00771773	0.017665
	ENSMUSG00000008398.17	Elk3	-0.109889	7.29508	3.7703	0.0643824	0.107877
	ENSMUSG00000040570.15	Rundc3b	0.798391	0.462221	15.0462	0.000747779	0.00238096
	ENSMUSG00000008435.16	Rdh13	-0.0541176	4.13653	1.07124	0.311312	0.403101
	ENSMUSG00000118672.1	Muc4	0.798062	5.87116	75.6562	9.05785e-09	1.67864e-07
	ENSMUSG00000026770.6	Il2ra	0.797597	1.93274	33.1448	6.99018e-06	4.36924e-05
	ENSMUSG00000034981.10	Parm1	0.795349	4.69004	55.0177	1.42941e-07	1.65301e-06
	ENSMUSG00000008540.12	Mgst1	-0.0886978	7.61668	1.11376	0.302108	0.393346
	ENSMUSG00000008575.18	Nfib	-0.0605716	7.61818	1.62471	0.215028	0.297727
	ENSMUSG00000008601.13	Rab25	0.0401077	4.68277	0.40592	0.530271	0.616946
	ENSMUSG00000001156.10	Mxd1	0.794284	5.54634	72.5162	1.32404e-08	2.27264e-07
	ENSMUSG00000008658.17	Rbfox1	-0.539858	0.418847	3.03755	0.0945708	0.149278
	ENSMUSG00000008668.16	Rps18	-0.0789481	8.25242	2.04946	0.165566	0.239213
	ENSMUSG00000071350.13	Setdb2	0.79345	3.43677	67.9382	2.35718e-08	3.67682e-07
	ENSMUSG00000008683.17	Rps15a	-0.105136	7.43634	3.2726	0.0833953	0.134536
	ENSMUSG00000008690.16	Ncaph2	0.0385649	6.53488	1.28072	0.269302	0.358419
	ENSMUSG00000019737.15	Syne4	0.793182	2.71141	57.3937	1.00406e-07	1.22447e-06
	ENSMUSG00000035105.6	Egln3	0.792987	1.41492	19.4623	0.000197463	0.000760502
	ENSMUSG00000087651.4	1500009L16Rik	0.79117	0.881768	17.9827	0.000303105	0.00109914
	ENSMUSG00000030317.9	Timp4	0.790963	1.72383	17.9573	0.000305393	0.0011063
	ENSMUSG00000081885.2	Gm13231	0.790819	-0.364492	10.0891	0.0041725	0.0103936
	ENSMUSG00000008855.18	Hdac5	0.0271684	7.10125	0.347217	0.561375	0.645676
	ENSMUSG00000043705.8	Capn13	0.789092	-0.247162	7.16867	0.0133764	0.0282069
	ENSMUSG00000032344.18	Cgas	0.788368	2.3965	37.9632	2.6318e-06	1.89574e-05
	ENSMUSG00000008958.15	Vps72	0.00728459	5.54843	0.0479527	0.828576	0.869908
	ENSMUSG00000026922.14	Agpat2	0.78795	5.47926	11.7509	0.00227206	0.00619586
	ENSMUSG00000008999.8	Bmp7	0.318911	2.41878	5.56778	0.0270553	0.0515254
	ENSMUSG00000047040.10	Prr15l	0.787929	6.18479	122.238	9.77397e-11	4.02951e-09
	ENSMUSG00000009030.15	Pdcl	0.103503	5.1562	2.87257	0.103454	0.161083
	ENSMUSG00000025094.9	Slc18a2	0.78761	1.15974	20.5143	0.000147017	0.000593204
	ENSMUSG00000020672.15	Sntg2	0.787006	0.771774	24.3807	5.28994e-05	0.000245938
	ENSMUSG00000009073.17	Nf2	0.0308822	7.08736	0.805769	0.378575	0.47265
	ENSMUSG00000009076.11	Zmat5	-0.0859291	4.00555	2.17015	0.154122	0.225595
	ENSMUSG00000009079.17	Ewsr1	-0.0434698	7.87895	1.99627	0.170933	0.245564
	ENSMUSG00000069662.6	Marcks	0.786813	7.1244	34.5701	5.19024e-06	3.40529e-05
	ENSMUSG00000009092.6	Derl3	-0.0513837	0.991011	0.116558	0.771429	0.823405
	ENSMUSG00000045392.9	Or5m3b	0.786384	1.03695	27.1766	2.66518e-05	0.000136821
	ENSMUSG00000009112.5	Bcl2l13	-0.0735765	5.52512	2.65036	0.117002	0.178865
	ENSMUSG00000009114.18	2610028H24Rik	0.104165	5.21804	1.20285	0.283981	0.373621
	ENSMUSG00000039899.6	Fgl2	0.786294	5.6628	64.7395	3.59027e-08	5.20455e-07
	ENSMUSG00000079415.3	Cntf	0.786049	0.153457	8.94093	0.00649106	0.015176
	ENSMUSG00000009207.16	Lnpk	0.0582222	2.71547	0.274172	0.605502	0.684961
	ENSMUSG00000009210.11	Prr29	0.224435	2.60558	3.71941	0.0660798	0.110356
	ENSMUSG00000030651.6	Art2b	0.784042	0.591076	7.17809	0.0133231	0.0281081
	ENSMUSG00000056481.8	Cd248	0.783721	4.39947	37.4997	2.8809e-06	2.04477e-05
	ENSMUSG00000050578.11	Mmp13	0.783333	0.14795	7.53851	0.0114512	0.0246755
	ENSMUSG00000037991.10	Rmi2	0.78091	0.101113	13.8894	0.00109045	0.00329117
	ENSMUSG00000009376.16	Met	-0.0295292	5.7943	0.266251	0.61073	0.689667
	ENSMUSG00000033967.5	Rnf225	0.77962	1.71535	36.1726	3.74727e-06	2.57278e-05
	ENSMUSG00000009394.14	Syn2	0.221142	3.73494	3.55745	0.0718311	0.118736
	ENSMUSG00000009406.14	Elk1	0.0267755	4.21454	0.123848	0.728068	0.788559
	ENSMUSG00000037962.8	Rflna	0.778594	3.09757	21.5926	0.000109513	0.000459637
	ENSMUSG00000079243.6	Xirp1	0.778355	2.34902	12.217	0.00192768	0.00538425
	ENSMUSG00000009535.14	Rnmt	0.0178392	4.39391	0.111881	0.741012	0.79877
	ENSMUSG00000009545.15	Kcnq1	0.0235632	5.11081	0.156472	0.696032	0.762635
	ENSMUSG00000041598.8	Cdc42ep4	0.777569	7.4989	152.112	1.09856e-11	6.49062e-10
	ENSMUSG00000009555.17	Cdk9	0.0836359	6.3164	5.58322	0.0268648	0.0512016
	ENSMUSG00000108322.4	5430431A17Rik	0.777304	1.01607	10.971	0.00300877	0.00785597
	ENSMUSG00000009566.13	Fpgs	0.0857501	4.37289	1.80615	0.191938	0.270577
	ENSMUSG00000048096.8	Lmod1	0.777276	4.42186	73.4264	1.18454e-08	2.0761e-07
	ENSMUSG00000009575.15	Cbx5	0.0605905	6.83836	3.04834	0.0940211	0.148587
	ENSMUSG00000106990.2	Gm42547	0.777198	2.95979	38.7283	2.27031e-06	1.67266e-05
	ENSMUSG00000045136.7	Tubb2b	0.776722	2.93111	12.1778	0.00195435	0.00544615
	ENSMUSG00000009621.19	Vav2	-0.0603276	5.88678	1.26964	0.271328	0.360483
	ENSMUSG00000051397.6	Tacstd2	0.775836	6.02485	54.7431	1.49002e-07	1.71176e-06
	ENSMUSG00000035638.15	Muc20	0.775751	4.18977	37.2212	3.04277e-06	2.14569e-05
	ENSMUSG00000009633.4	G0s2	-0.37843	5.99249	2.56845	0.122514	0.185885
	ENSMUSG00000031896.8	Ctrl	0.773716	-0.427444	9.85396	0.00456069	0.0112146
	ENSMUSG00000044162.13	Tnip3	0.773681	1.18494	10.7864	0.00321921	0.00831947
	ENSMUSG00000009654.5	Oit3	-0.221689	0.300609	1.09851	0.305367	0.396966
	ENSMUSG00000009670.12	Tex11	0.240997	1.31417	2.0342	0.167084	0.241107
	ENSMUSG00000009681.11	Bcr	0.0574589	6.70451	2.02168	0.168343	0.242563
	ENSMUSG00000115902.2	D730005E14Rik	0.773472	2.52658	41.8988	1.25503e-06	1.0128e-05
	ENSMUSG00000009731.5	Kcnd1	-0.0881201	0.892306	0.150115	0.701949	0.767912
	ENSMUSG00000009733.10	Tfcp2	-0.0777811	4.15342	2.52109	0.125839	0.190067
	ENSMUSG00000100801.2	Gm15459	0.773027	7.72047	62.2396	5.04325e-08	6.87103e-07
	ENSMUSG00000009741.16	Ubp1	-0.0176923	6.67673	0.252495	0.62005	0.697886
	ENSMUSG00000074867.5	Zfp808	0.772895	1.19861	6.34109	0.0191215	0.0383552
	ENSMUSG00000009828.16	Cilk1	0.00403135	5.81084	0.0122957	0.912658	0.935571
	ENSMUSG00000009863.15	Sdhb	0.047567	6.03459	0.558575	0.462327	0.552871
	ENSMUSG00000009876.14	Cox4i2	0.138138	5.37959	4.0743	0.0552188	0.0945562
	ENSMUSG00000009894.16	Snap47	-0.00496896	5.27879	0.00798881	0.929545	0.948029
	ENSMUSG00000078915.3	Hsp25-ps1	0.772466	4.09501	38.8693	2.20978e-06	1.63498e-05
	ENSMUSG00000031284.17	Pak3	0.771406	-0.00067378	10.4745	0.00361235	0.00921261
	ENSMUSG00000093798.3	Gm8355	0.771353	4.08393	64.2393	3.83981e-08	5.5204e-07
	ENSMUSG00000051855.16	Mest	0.768669	2.55714	9.99228	0.00432777	0.0107235
	ENSMUSG00000074151.14	Nlrc5	0.766939	5.83418	17.5873	0.000340856	0.00121493
	ENSMUSG00000010021.14	Kif19a	0.137464	4.01159	1.47732	0.236393	0.32257
	ENSMUSG00000047098.19	Rnf31	0.766733	5.85708	219.741	2.43063e-13	3.0277e-11
	ENSMUSG00000019775.18	Rgs17	0.766717	0.221128	12.1875	0.00194774	0.00543031
	ENSMUSG00000001627.13	Ifrd1	0.763599	5.68325	138.098	2.91069e-11	1.49293e-09
	ENSMUSG00000054364.6	Rhob	0.762751	7.87643	69.6291	1.89852e-08	3.10584e-07
	ENSMUSG00000092325.3	Gm18284	0.762535	0.442552	14.5577	0.000875512	0.00273474
	ENSMUSG00000028339.18	Col15a1	0.76165	4.67772	27.2877	2.59574e-05	0.00013361
	ENSMUSG00000039519.7	Cyp7b1	0.760973	2.12154	23.5067	6.61209e-05	0.000297723
	ENSMUSG00000010057.9	Nprl2	0.076878	3.89011	1.59207	0.219541	0.302838
	ENSMUSG00000010066.16	Cacna2d2	0.051915	0.0485848	0.00745911	0.931915	0.950056
	ENSMUSG00000078495.11	Zfp984	0.759823	3.96317	9.30414	0.00563243	0.0134517
	ENSMUSG00000031344.12	Gabrq	0.759433	0.572273	7.3914	0.0121777	0.0260125
	ENSMUSG00000010086.18	Rnf112	0.0496695	-0.453469	0.0350634	0.873403	0.904788
	ENSMUSG00000028179.13	Cth	0.758661	2.26485	53.9509	1.68107e-07	1.89749e-06
	ENSMUSG00000010097.16	Nxf1	0.0105234	7.39871	0.0946139	0.76113	0.815712
	ENSMUSG00000027580.18	Helz2	0.757996	7.79957	103.84	4.76643e-10	1.46858e-08
	ENSMUSG00000010122.15	Slc47a1	-0.118582	2.04608	0.707053	0.408988	0.501748
	ENSMUSG00000010136.15	Pifo	-0.142742	3.18159	1.17557	0.289374	0.379542
	ENSMUSG00000092178.3	Gm45351	0.757198	0.659055	5.86379	0.0236514	0.0459358
	ENSMUSG00000010154.8	Spire2	0.250925	2.42824	3.00301	0.0963546	0.151695
	ENSMUSG00000010175.14	Prox1	0.0320654	1.88815	0.0503906	0.824346	0.866192
	ENSMUSG00000022225.8	Cma1	0.756188	0.877051	7.57075	0.0112984	0.0243854
	ENSMUSG00000097125.4	Gm26885	0.755173	0.524343	11.4894	0.00249432	0.00669104
	ENSMUSG00000036887.6	C1qa	0.754912	5.767	32.7254	7.64156e-06	4.70555e-05
	ENSMUSG00000010307.8	Tmem86a	-0.0778967	4.29381	1.07989	0.309409	0.401084
	ENSMUSG00000015053.15	Gata2	0.754633	7.57695	238.043	1.04137e-13	1.48856e-11
	ENSMUSG00000010342.17	Tex14	-0.482406	-0.25961	3.30206	0.0821052	0.132835
	ENSMUSG00000031504.7	Rab20	0.75339	3.64327	52.9548	1.95999e-07	2.16057e-06
	ENSMUSG00000010362.10	Rdm1	-0.0909261	4.24674	2.25167	0.146928	0.216885
	ENSMUSG00000045349.16	Sh2d5	0.751995	-0.4316	14.3265	0.000944112	0.00291663
	ENSMUSG00000010392.9	Gosr1	-0.0547223	5.86617	1.97343	0.173303	0.248498
	ENSMUSG00000010406.13	Mrpl52	-0.106423	4.60222	3.11954	0.0904865	0.143991
	ENSMUSG00000029436.10	Mmp17	0.751724	2.38142	43.3467	9.6686e-07	8.09072e-06
	ENSMUSG00000033781.8	Asb13	0.751705	5.55487	143.548	1.97329e-11	1.05559e-09
	ENSMUSG00000028464.17	Tpm2	0.751658	5.87938	75.3505	9.39388e-09	1.7208e-07
	ENSMUSG00000010538.15	Tsacc	-0.517945	-0.220076	4.87907	0.037305	0.0677571
	ENSMUSG00000036896.6	C1qc	0.750811	5.59896	34.6927	5.06084e-06	3.33293e-05
	ENSMUSG00000024805.17	Pcgf5	0.749456	4.7544	101.298	6.04082e-10	1.7825e-08
	ENSMUSG00000021877.13	Arf4	0.749257	7.19653	170.166	3.4935e-12	2.61473e-10
	ENSMUSG00000078153.4	Psme2b	0.749234	4.83403	84.7881	3.20712e-09	7.10659e-08
	ENSMUSG00000010609.16	Psen2	-0.134669	5.05852	4.71128	0.0404194	0.0726374
	ENSMUSG00000010651.5	Acaa1b	-0.255841	2.6824	2.00447	0.170093	0.244578
	ENSMUSG00000010660.4	Plcd1	0.127488	4.18453	4.4237	0.0464616	0.0817107
	ENSMUSG00000010663.6	Fads1	0.038964	7.50617	1.01869	0.323218	0.415495
	ENSMUSG00000010721.16	Lmbr1	-0.117527	4.28805	4.34105	0.0483818	0.0846015
	ENSMUSG00000010751.16	Tnfrsf22	0.165251	3.33895	3.91279	0.0598879	0.101475
	ENSMUSG00000079014.5	Serpina3i	0.746173	0.78165	12.5874	0.00169469	0.00481723
	ENSMUSG00000010760.6	Phlda2	-0.168822	-0.316116	0.476572	0.496813	0.585361
	ENSMUSG00000010797.7	Wnt2	-0.167918	4.54098	2.79827	0.107769	0.166745
	ENSMUSG00000030862.14	Cpxm2	0.745757	1.81146	29.9712	1.39658e-05	7.88954e-05
	ENSMUSG00000010911.13	Apip	0.0703871	3.69189	1.21345	0.281922	0.371613
	ENSMUSG00000070532.6	Ccdc190	0.743353	-0.391983	8.33014	0.00827838	0.0187392
	ENSMUSG00000010936.12	Vac14	0.0188198	5.10808	0.128416	0.723314	0.785128
	ENSMUSG00000011008.14	Mcoln2	-0.0290463	1.15248	0.0197795	0.889366	0.917026
	ENSMUSG00000011034.7	Slc5a1	0.105525	2.42306	0.409689	0.528385	0.615161
	ENSMUSG00000022218.17	Tgm1	0.741074	2.38605	33.0248	7.17004e-06	4.45402e-05
	ENSMUSG00000031548.8	Sfrp1	0.740416	5.16686	57.7311	9.55768e-08	1.17048e-06
	ENSMUSG00000121503.1	ENSMUSG00000121503.1	0.740369	4.43628	70.2839	1.74779e-08	2.8947e-07
	ENSMUSG00000021025.9	Nfkbia	0.739721	6.97941	76.5875	8.11238e-09	1.52943e-07
	ENSMUSG00000071266.14	Zfp946	0.739349	3.19793	22.9081	7.7236e-05	0.000340819
	ENSMUSG00000011171.12	Vipr2	0.0129939	5.23567	0.0204473	0.887527	0.915454
	ENSMUSG00000011179.9	Odc1	0.154387	6.48355	4.35099	0.0481461	0.0842738
	ENSMUSG00000011254.17	Thg1l	-0.0410307	2.79065	0.234054	0.633059	0.709278
	ENSMUSG00000023987.15	Pgc	0.737877	0.796013	6.52446	0.0176448	0.035855
	ENSMUSG00000011257.20	Pabpc4	-0.0364649	5.0842	0.434068	0.516472	0.603993
	ENSMUSG00000011263.17	Exoc3l2	-0.21103	1.78157	1.78089	0.194962	0.274145
	ENSMUSG00000011267.9	Zfp296	0.447184	1.4114	5.61533	0.0264735	0.0505941
	ENSMUSG00000011305.12	Plin5	0.0650932	2.26612	0.0982612	0.756721	0.81224
	ENSMUSG00000009035.16	Tmem184b	0.737307	7.72736	204.064	5.29532e-13	5.77157e-11
	ENSMUSG00000011382.9	Dhdh	-0.152789	5.02343	3.21086	0.0861756	0.138249
	ENSMUSG00000036995.8	Asap3	0.737019	4.65308	130.639	5.06528e-11	2.35752e-09
	ENSMUSG00000011463.6	Cpb1	-0.139997	0.391389	0.462977	0.502956	0.59112
	ENSMUSG00000011658.17	Fuz	-0.0137567	5.03392	0.0933027	0.762738	0.816778
	ENSMUSG00000023307.15	Marchf5	0.736838	5.75424	197.838	7.32426e-13	7.51595e-11
	ENSMUSG00000011831.17	Evi5	-0.0812246	5.60737	2.01365	0.169156	0.243433
	ENSMUSG00000052212.7	Cd177	0.734666	3.66221	5.99534	0.022294	0.0437624
	ENSMUSG00000121066.1	ENSMUSG00000121066.1	0.733965	2.29542	16.787	0.000433942	0.00149615
	ENSMUSG00000022500.16	Litaf	0.732475	6.4286	166.353	4.40884e-12	3.1771e-10
	ENSMUSG00000011884.14	Gltp	0.0937093	7.07729	4.72264	0.0401997	0.0723245
	ENSMUSG00000024472.10	Dcp2	0.732105	5.56493	177.398	2.27485e-12	1.82412e-10
	ENSMUSG00000011960.13	Ccnt1	0.0664789	5.41269	0.846979	0.366859	0.460789
	ENSMUSG00000040747.10	Cd53	0.731667	5.40062	39.842	1.83715e-06	1.39054e-05
	ENSMUSG00000012076.9	Brms1l	0.106719	4.71899	5.29873	0.0306285	0.0573348
	ENSMUSG00000038112.16	AW551984	0.731011	0.547416	15.3715	0.000674072	0.00218375
	ENSMUSG00000012117.14	Dhdds	0.0532992	5.67659	2.36763	0.137374	0.204863
	ENSMUSG00000035372.3	1810055G02Rik	0.730572	4.31696	265.034	3.30715e-14	5.65425e-12
	ENSMUSG00000012126.17	Ubxn11	-0.218645	4.22436	4.1397	0.0534467	0.0920004
	ENSMUSG00000059089.5	Fcgr4	0.729665	3.43197	21.9732	9.88795e-05	0.000419961
	ENSMUSG00000012350.16	Ehf	-0.126358	5.38661	4.10325	0.0544261	0.0933913
	ENSMUSG00000012405.17	Rpl15	-0.000394829	7.83516	0.000146282	0.990453	0.993244
	ENSMUSG00000079018.11	Ly6c1	0.728879	8.11967	50.7083	2.79216e-07	2.89319e-06
	ENSMUSG00000101111.2	Gm28437	0.728099	11.4178	24.8327	4.72153e-05	0.000223201
	ENSMUSG00000012429.10	Mplkip	0.137044	3.86948	2.54064	0.124454	0.188301
	ENSMUSG00000012443.5	Kif11	-0.0776573	2.78947	0.176379	0.678359	0.74679
	ENSMUSG00000012483.5	Rpa3	-0.181161	2.5806	4.91421	0.0366874	0.0668435
	ENSMUSG00000026669.15	Mcm10	0.727593	1.39143	16.2613	0.000510015	0.00171596
	ENSMUSG00000027894.15	Slc6a17	0.727468	1.02523	13.514	0.00123599	0.00366322
	ENSMUSG00000089940.2	Gm4117	0.726899	0.0617676	9.2535	0.00574429	0.0136832
	ENSMUSG00000056290.17	Ms4a4b	0.725585	4.47201	23.3547	6.87687e-05	0.000308213
	ENSMUSG00000020182.17	Ddc	0.724436	1.27664	8.61352	0.00738952	0.0169928
	ENSMUSG00000012819.17	Cdh23	-0.610562	-0.0306251	4.6375	0.0418805	0.0748006
	ENSMUSG00000012848.16	Rps5	0.0799509	8.32344	1.71479	0.203158	0.283883
	ENSMUSG00000012889.9	Podnl1	-0.329273	1.74604	3.70624	0.0665272	0.111014
	ENSMUSG00000037411.11	Serpine1	0.724168	5.73026	7.87709	0.00995427	0.0219321
	ENSMUSG00000091754.9	Gm3636	0.724034	0.289982	10.7387	0.00327626	0.00844687
	ENSMUSG00000064215.14	Ifi27	0.723262	6.63264	155.678	8.68106e-12	5.48749e-10
	ENSMUSG00000024892.18	Pcx	0.723224	6.76615	9.96704	0.00436927	0.010814
	ENSMUSG00000013155.11	Enkd1	0.0518937	2.79284	0.270636	0.607824	0.687052
	ENSMUSG00000020309.7	Chac2	0.722963	1.55315	17.8581	0.000314492	0.00113385
	ENSMUSG00000032446.15	Eomes	0.722884	1.6045	15.1535	0.000722543	0.00231201
	ENSMUSG00000013275.10	Slc41a1	-0.0512927	5.95819	1.09028	0.307144	0.398771
	ENSMUSG00000052270.8	Fpr2	0.722822	3.23097	31.7348	9.45771e-06	5.64385e-05
	ENSMUSG00000022534.15	Mefv	0.720722	1.72038	11.3943	0.00258103	0.00689393
	ENSMUSG00000063767.5	S100a7a	0.720482	-0.0423192	13.3301	0.00131491	0.00386624
	ENSMUSG00000039546.10	Ajap1	0.717943	0.0299507	6.78424	0.0157646	0.0325156
	ENSMUSG00000046223.11	Plaur	0.717405	5.37036	86.6769	2.61629e-09	5.97976e-08
	ENSMUSG00000013495.16	Tmem175	0.106308	4.97183	4.1992	0.0518899	0.0897605
	ENSMUSG00000111497.2	Gm38431	0.717342	1.36274	6.68656	0.0164442	0.0337135
	ENSMUSG00000013539.15	Tango2	0.0287058	4.32415	0.229045	0.636703	0.712399
	ENSMUSG00000013584.6	Aldh1a2	0.270448	4.93228	5.22116	0.0317546	0.0591506
	ENSMUSG00000013593.13	Ndufs2	0.0966923	6.6759	3.52367	0.0731017	0.120528
	ENSMUSG00000013622.16	Atraid	-0.0205374	5.84434	0.312711	0.581368	0.663483
	ENSMUSG00000028776.15	Tinagl1	0.716737	7.00854	68.1529	2.29278e-08	3.61031e-07
	ENSMUSG00000079227.11	Ccr5	0.71607	3.6282	26.7989	2.91684e-05	0.000147703
	ENSMUSG00000024339.13	Tap2	0.711636	7.23947	48.8816	3.75378e-07	3.70261e-06
	ENSMUSG00000021730.9	Hcn1	0.711335	-0.445686	6.64884	0.0167153	0.0341973
	ENSMUSG00000013698.13	Pea15a	0.10139	8.05388	4.70575	0.0405269	0.0727931
	ENSMUSG00000031217.9	Efnb1	0.710549	7.36118	128.832	5.81644e-11	2.64148e-09
	ENSMUSG00000013707.4	Tnfaip8l2	-0.0240383	3.58472	0.0421522	0.839117	0.877879
	ENSMUSG00000116637.2	Gm8130	0.709859	-0.45146	7.30653	0.0126198	0.026842
	ENSMUSG00000013766.12	Ly6g6e	-0.264793	0.521489	2.19794	0.151623	0.222478
	ENSMUSG00000038774.10	Ascc3	0.709597	4.92079	109.189	2.93949e-10	9.88913e-09
	ENSMUSG00000013822.8	Elof1	-0.00836329	6.06851	0.0211458	0.885636	0.91372
	ENSMUSG00000115219.3	Eef1akmt4	0.708136	1.91413	34.6439	5.11189e-06	3.36401e-05
	ENSMUSG00000028031.7	Dkk2	0.706624	0.609235	9.16254	0.00595137	0.0141186
	ENSMUSG00000059146.13	Ntrk3	0.706226	2.94942	14.4873	0.00089582	0.00279079
	ENSMUSG00000013878.19	Rnf170	-0.0738062	4.36918	1.15123	0.294301	0.385049
	ENSMUSG00000034708.13	Grn	0.706034	8.21007	150.198	1.249e-11	7.23634e-10
	ENSMUSG00000100287.2	Gm28068	0.705272	-0.311966	7.61469	0.0110939	0.0240092
	ENSMUSG00000013974.4	Mcemp1	0.0935758	3.95837	1.02178	0.322501	0.414665
	ENSMUSG00000013997.11	Nit1	-0.0155896	5.55783	0.179819	0.675426	0.744313
	ENSMUSG00000039960.6	Rhou	0.705172	4.25126	85.9995	2.81333e-09	6.36337e-08
	ENSMUSG00000042745.10	Id1	0.704949	6.12938	64.7608	3.58001e-08	5.19399e-07
	ENSMUSG00000078578.10	Ube2d3	0.704926	7.56938	37.3036	2.99388e-06	2.11463e-05
	ENSMUSG00000014075.16	Dynlt2b	-0.086631	2.72373	0.717706	0.405533	0.498225
	ENSMUSG00000029826.15	Zc3hav1	0.703677	6.78935	208.88	4.14551e-13	4.88469e-11
	ENSMUSG00000014158.13	Trpv4	-0.162497	3.62022	2.4303	0.132518	0.19876
	ENSMUSG00000114432.2	Gm49391	0.703451	3.16791	14.0087	0.00104817	0.00318285
	ENSMUSG00000067925.5	Rtl8a	0.703008	6.88615	133.919	3.95709e-11	1.95489e-09
	ENSMUSG00000020108.5	Ddit4	0.702986	4.42696	14.2138	0.00097968	0.00300424
	ENSMUSG00000026043.19	Col3a1	0.702574	9.06296	15.2213	0.000707069	0.00227292
	ENSMUSG00000025666.17	Tmem47	0.702195	4.70032	25.8987	3.62723e-05	0.000178334
	ENSMUSG00000014243.6	Zswim7	-0.232231	1.42546	2.00224	0.170321	0.244846
	ENSMUSG00000075256.10	Cerkl	0.701806	2.22838	8.0907	0.00912163	0.0203425
	ENSMUSG00000014294.5	Ndufa2	-0.0633727	5.30897	1.02319	0.322174	0.414335
	ENSMUSG00000014301.14	Pam16	-0.13923	3.26614	3.1376	0.0896149	0.142891
	ENSMUSG00000014303.14	Glis2	0.0197695	6.41756	0.0587671	0.810581	0.8549
	ENSMUSG00000014313.16	Cox6c	0.0295224	6.61148	0.347159	0.561407	0.645676
	ENSMUSG00000000555.9	Itga5	0.700684	6.31181	293.855	1.08837e-14	2.43334e-12
	ENSMUSG00000030142.11	Clec4e	0.700587	2.1456	9.6806	0.00487225	0.0118752
	ENSMUSG00000014353.16	Tmem87b	0.0112421	5.78048	0.0739602	0.788056	0.837472
	ENSMUSG00000073073.5	Gm8098	0.699337	-0.271567	8.80244	0.00685553	0.0159108
	ENSMUSG00000014361.6	Mertk	-0.0911677	6.18379	3.91363	0.0598625	0.101462
	ENSMUSG00000053647.5	Gper1	0.698547	1.00562	12.9839	0.0014789	0.00428555
	ENSMUSG00000053007.10	Creb5	0.698444	3.35486	40.0177	1.77741e-06	1.35001e-05
	ENSMUSG00000039470.16	Zdhhc2	0.698325	1.80165	28.4749	1.96499e-05	0.000105568
	ENSMUSG00000024529.15	Lox	0.698066	5.82625	17.065	0.000398789	0.00139285
	ENSMUSG00000060467.5	Gm10080	0.697268	3.50526	48.1459	4.2382e-07	4.09928e-06
	ENSMUSG00000040010.11	Slc7a5	0.696519	3.66877	69.2515	1.99182e-08	3.2312e-07
	ENSMUSG00000020918.15	Kat2a	0.696405	5.27567	187.665	1.26977e-12	1.14733e-10
	ENSMUSG00000026864.14	Hspa5	0.696128	9.18448	113.694	1.98606e-10	7.20051e-09
	ENSMUSG00000014503.16	Pkd2l2	0.126925	1.89897	1.21957	0.280742	0.370451
	ENSMUSG00000014504.17	Srp19	-0.0272691	4.59497	0.201304	0.657824	0.729572
	ENSMUSG00000026466.17	Tor1aip1	0.695255	7.54945	228.169	1.63254e-13	2.22421e-11
	ENSMUSG00000117401.2	4833419F23Rik	0.694269	-0.239786	10.266	0.0039044	0.00982948
	ENSMUSG00000046714.8	Foxc2	0.692641	0.0387732	15.4059	0.000666763	0.002163
	ENSMUSG00000014554.14	Dguok	-0.0130778	4.96016	0.0958494	0.759626	0.814405
	ENSMUSG00000014592.22	Camta1	-0.165238	4.00583	5.6271	0.0263316	0.0503781
	ENSMUSG00000025743.15	Sdc3	0.692363	8.13838	185.661	1.41957e-12	1.2503e-10
	ENSMUSG00000034168.8	Irf2bpl	0.692059	6.82802	190.395	1.09261e-12	1.02995e-10
	ENSMUSG00000079555.3	Haus3	0.691304	3.06544	20.5252	0.000146576	0.000591972
	ENSMUSG00000014606.15	Slc25a11	-0.00976015	6.18641	0.0696898	0.794115	0.841807
	ENSMUSG00000032492.15	Pth1r	0.690267	2.24182	9.63741	0.00495344	0.0120395
	ENSMUSG00000014668.16	Chfr	-0.0514762	5.20154	1.20227	0.284096	0.373715
	ENSMUSG00000025355.8	Mmp19	0.69022	4.727	82.7717	4.00189e-09	8.57357e-08
	ENSMUSG00000097805.3	Gm17473	0.689514	0.230311	9.0377	0.00624903	0.0147107
	ENSMUSG00000047281.4	Sfn	0.689416	4.51346	73.5865	1.1617e-08	2.04222e-07
	ENSMUSG00000014763.9	Fam120b	-0.0526203	5.76754	2.15777	0.155251	0.226923
	ENSMUSG00000014767.18	Tbp	0.0336648	4.61149	0.344584	0.562852	0.647081
	ENSMUSG00000014769.11	Psmb1	0.0277982	6.46584	0.846801	0.366908	0.460789
	ENSMUSG00000014771.14	Pdcd2	-0.0531577	3.26638	0.480292	0.495155	0.583762
	ENSMUSG00000052749.10	Trim30b	0.688969	3.13985	31.2257	1.05698e-05	6.18547e-05
	ENSMUSG00000121069.1	ENSMUSG00000121069.1	0.688659	7.34584	51.9418	2.29597e-07	2.46083e-06
	ENSMUSG00000014778.11	Fhod1	0.110401	7.45393	3.38125	0.078749	0.128214
	ENSMUSG00000016534.16	Lamp2	0.688216	7.99353	60.5182	6.41084e-08	8.40591e-07
	ENSMUSG00000014791.11	Elmo3	-0.00965071	5.07037	0.0362923	0.850567	0.886825
	ENSMUSG00000014813.10	Stc1	0.24979	2.64604	3.24419	0.0846616	0.136188
	ENSMUSG00000000392.18	Fap	0.688116	0.971646	18.4739	0.000262433	0.000974154
	ENSMUSG00000014846.13	Tppp3	0.146122	8.48341	3.47106	0.0751319	0.123234
	ENSMUSG00000014850.16	Msh3	-0.116253	3.81745	3.02468	0.095231	0.150234
	ENSMUSG00000021411.17	Pxdc1	0.687746	7.28818	113.273	2.05896e-10	7.40334e-09
	ENSMUSG00000035109.15	Shc4	0.687439	-0.112217	8.31842	0.0083176	0.0188157
	ENSMUSG00000050822.12	Slc29a4	0.687141	0.540701	9.5839	0.00505613	0.0122617
	ENSMUSG00000014873.16	Surf2	0.0657899	4.62178	2.45542	0.130629	0.196197
	ENSMUSG00000049482.17	Ctu2	0.686612	4.51466	207.629	4.41545e-13	5.06586e-11
	ENSMUSG00000067297.6	Ifit1bl2	0.686455	1.87619	27.8282	2.2848e-05	0.00011969
	ENSMUSG00000014932.16	Yes1	-0.053579	5.0047	0.351447	0.559017	0.643521
	ENSMUSG00000036052.15	Dnajb5	0.686342	5.31704	102.589	5.35256e-10	1.61493e-08
	ENSMUSG00000021493.16	Pdlim7	0.685218	5.46474	97.533	8.65948e-10	2.40574e-08
	ENSMUSG00000014980.15	Tsen15	0.0572247	3.81345	0.877387	0.358546	0.452733
	ENSMUSG00000022754.7	Tmem45a	0.684885	3.36561	75.6007	9.1179e-09	1.6844e-07
	ENSMUSG00000015013.10	Trappc2l	0.00361427	4.25319	0.00349379	0.953371	0.965776
	ENSMUSG00000019139.11	Isyna1	0.68264	5.54638	105.012	4.27994e-10	1.34e-08
	ENSMUSG00000015023.8	Ddx19a	0.0461525	5.48075	2.09298	0.161325	0.23423
	ENSMUSG00000015027.12	Galns	0.027237	4.11163	0.185719	0.670473	0.740321
	ENSMUSG00000014773.14	Dll1	0.681352	5.444	29.3002	1.6256e-05	8.98535e-05
	ENSMUSG00000015083.12	C8g	-0.469472	0.38877	4.83169	0.0381562	0.0691403
	ENSMUSG00000015085.9	Entpd2	0.0539218	3.55607	0.259492	0.61527	0.693626
	ENSMUSG00000015087.15	Rabl6	-0.0280129	6.29825	0.86829	0.361005	0.455309
	ENSMUSG00000024640.10	Psat1	0.681333	3.64307	38.8915	2.20041e-06	1.62943e-05
	ENSMUSG00000015093.16	Clic3	0.0360913	6.99832	0.51774	0.478978	0.569231
	ENSMUSG00000102649.2	Gm38021	0.681246	-0.389891	7.82672	0.0101626	0.0223094
	ENSMUSG00000015605.7	Srf	0.681184	5.87682	170.232	3.47964e-12	2.61473e-10
	ENSMUSG00000015112.16	Slc25a13	0.180534	2.82382	3.80202	0.0633495	0.1064
	ENSMUSG00000030110.14	Ret	0.679158	1.99459	30.2472	1.31276e-05	7.45951e-05
	ENSMUSG00000015126.10	Tsr3	-0.0204955	3.643	0.087589	0.769892	0.822126
	ENSMUSG00000056313.6	Tcim	0.678108	5.72544	66.5195	2.83545e-08	4.29605e-07
	ENSMUSG00000026064.17	ENSMUSG00000026064.17	0.677809	1.82785	6.41684	0.0184955	0.0372709
	ENSMUSG00000037686.7	Aspg	0.677457	2.25257	16.6494	0.000452577	0.00154998
	ENSMUSG00000120144.1	ENSMUSG00000120144.1	0.677045	4.77085	29.5778	1.52624e-05	8.49414e-05
	ENSMUSG00000015149.15	Sirt2	0.0347475	6.57481	1.19387	0.285743	0.375514
	ENSMUSG00000030208.16	Emp1	0.676401	7.66842	86.5695	2.64651e-09	6.04091e-08
	ENSMUSG00000030149.16	Klrk1	0.675572	3.33441	17.2076	0.000381981	0.00134248
	ENSMUSG00000015189.13	Casd1	0.124964	5.47711	3.2937	0.0824688	0.133337
	ENSMUSG00000032712.17	Resf1	0.675493	6.57644	151.412	1.15118e-11	6.75939e-10
	ENSMUSG00000015214.15	Mtmr1	-0.055035	4.97914	1.1234	0.300075	0.391165
	ENSMUSG00000015217.12	Hmgb3	-0.0898849	4.15688	1.12882	0.298937	0.389857
	ENSMUSG00000015222.19	Map2	-0.100179	3.02219	0.808645	0.37774	0.471877
	ENSMUSG00000015224.11	Cyp2j9	0.000986703	3.17999	0.000165526	0.989845	0.992748
	ENSMUSG00000015243.5	Abca1	0.104107	5.74952	0.832445	0.37093	0.464902
	ENSMUSG00000038213.8	Tapbpl	0.675251	5.80871	105.413	4.12621e-10	1.30253e-08
	ENSMUSG00000015289.5	Lage3	0.00275311	3.99703	0.00302562	0.963292	0.973691
	ENSMUSG00000121137.1	ENSMUSG00000121137.1	0.673683	6.34995	58.7311	8.26855e-08	1.03962e-06
	ENSMUSG00000083396.2	Gm15542	0.673562	5.33498	55.2779	1.37444e-07	1.60219e-06
	ENSMUSG00000014226.11	Cacybp	0.672579	4.99016	131.37	4.79181e-11	2.28943e-09
	ENSMUSG00000019122.9	Ccl9	0.672536	4.09415	22.2884	9.0921e-05	0.000391306
	ENSMUSG00000015314.11	Slamf6	-0.285766	3.05458	3.52172	0.0731759	0.120616
	ENSMUSG00000015316.12	Slamf1	-0.516065	1.12099	5.30719	0.0305085	0.0571654
	ENSMUSG00000015335.17	Zdhhc12	0.0307281	3.76134	0.249447	0.622158	0.699762
	ENSMUSG00000114608.3	ENSMUSG00000114608.3	0.671533	3.21673	19.506	0.000195026	0.000752613
	ENSMUSG00000015340.11	Cybb	-0.0859893	6.6652	0.7349	0.400049	0.493001
	ENSMUSG00000021118.8	Plek2	0.671429	-0.0747369	8.23821	0.00859153	0.0193471
	ENSMUSG00000015342.7	Xk	0.0984758	1.46989	0.589367	0.45039	0.541493
	ENSMUSG00000003528.16	Slc25a1	0.671157	6.17321	16.1843	0.000522319	0.00174947
	ENSMUSG00000015355.14	Cd48	-0.222632	4.36694	5.2242	0.0317095	0.0590856
	ENSMUSG00000099757.3	BE692007	0.670386	2.98639	12.465	0.00176812	0.00499215
	ENSMUSG00000029659.17	Medag	0.669829	4.32375	75.5649	9.15687e-09	1.68981e-07
	ENSMUSG00000015377.11	Dennd6b	-0.111296	4.21315	3.21075	0.0861808	0.138249
	ENSMUSG00000019831.15	Wasf1	0.669296	0.0471162	11.9123	0.00214573	0.00590024
	ENSMUSG00000021200.15	Asb2	0.669034	3.73544	22.056	9.67179e-05	0.000411984
	ENSMUSG00000022181.17	C6	0.668305	5.61295	42.8626	1.05428e-06	8.72186e-06
	ENSMUSG00000015451.17	C4a	-0.0212214	0.553278	0.0152174	0.902883	0.927781
	ENSMUSG00000015452.15	Ager	0.0417967	10.8877	0.593285	0.448907	0.539859
	ENSMUSG00000038074.17	Fkbp14	0.66738	4.14748	68.1291	2.29983e-08	3.61322e-07
	ENSMUSG00000036432.9	Siah2	0.666985	3.80139	77.8791	6.97411e-09	1.35135e-07
	ENSMUSG00000015468.15	Notch4	0.0989251	7.3137	1.54921	0.225652	0.310098
	ENSMUSG00000046687.7	Gm5424	0.666147	3.11995	46.5406	5.54834e-07	5.1303e-06
	ENSMUSG00000015476.7	Prrt1	-0.231939	2.41415	3.52809	0.0729339	0.120296
	ENSMUSG00000015478.14	Rnf5	0.100578	4.80472	4.52685	0.0441844	0.0783777
	ENSMUSG00000051439.8	Cd14	0.666038	5.37179	33.7876	6.10602e-06	3.9019e-05
	ENSMUSG00000112843.2	Gm46224	0.665128	-0.371633	6.03798	0.0218728	0.0430616
	ENSMUSG00000067106.7	Gm5529	0.665006	0.738665	14.7444	0.000824073	0.00259311
	ENSMUSG00000037075.8	Rnf139	0.664784	5.55462	64.9616	3.48514e-08	5.07747e-07
	ENSMUSG00000015536.15	Mocs2	0.0806125	5.23562	3.09071	0.0918989	0.145905
	ENSMUSG00000097487.8	Ptges3l	0.664194	0.867974	19.1962	0.000213024	0.000812715
	ENSMUSG00000015568.17	Lpl	-0.0385184	7.82961	0.0836836	0.77493	0.826595
	ENSMUSG00000042717.6	Ppp1r3a	0.663853	1.1504	7.62173	0.0110615	0.023954
	ENSMUSG00000067780.4	Pi15	0.662668	2.83747	11.5801	0.00241467	0.00651647
	ENSMUSG00000015599.10	Ttbk1	-0.541445	-0.179942	5.06827	0.0341119	0.0628835
	ENSMUSG00000000275.17	Trim25	0.661938	7.22715	178.242	2.16593e-12	1.77332e-10
	ENSMUSG00000015619.11	Gata3	-0.216757	3.79127	3.7168	0.0661681	0.110464
	ENSMUSG00000015627.6	Gata5	-0.109376	4.07944	0.628124	0.436057	0.528009
	ENSMUSG00000022216.18	Psme1	0.661642	7.20055	108.332	3.1718e-10	1.04928e-08
	ENSMUSG00000041736.8	Tspo	0.661535	6.90686	111.221	2.45903e-10	8.52546e-09
	ENSMUSG00000015653.14	Steap2	-0.0339638	4.08444	0.246112	0.624483	0.701698
	ENSMUSG00000038467.16	Chmp4b	0.660648	7.37288	208.688	4.18578e-13	4.89905e-11
	ENSMUSG00000026819.16	Slc25a25	0.660105	5.15905	67.721	2.42433e-08	3.76138e-07
	ENSMUSG00000015668.14	Pdzd11	0.0728825	4.57995	1.61035	0.216999	0.299896
	ENSMUSG00000035085.6	1700020L24Rik	0.659891	2.82101	27.5173	2.45835e-05	0.000127365
	ENSMUSG00000064337.1	mt-Rnr1	0.659051	7.14202	46.8791	5.23921e-07	4.88853e-06
	ENSMUSG00000034675.18	Dbn1	0.658539	3.94589	53.6477	1.76111e-07	1.97377e-06
	ENSMUSG00000015702.14	Anxa9	-0.145905	2.7505	2.33867	0.139689	0.207817
	ENSMUSG00000015709.10	Arnt2	-0.0949728	0.617191	0.211952	0.649518	0.722889
	ENSMUSG00000031712.11	Il15	0.657674	2.4885	35.3763	4.40062e-06	2.95388e-05
	ENSMUSG00000032113.17	Chek1	0.657481	0.498492	13.9432	0.00107117	0.00324138
	ENSMUSG00000055994.16	Nod2	0.657275	3.37981	31.0134	1.10747e-05	6.43345e-05
	ENSMUSG00000015745.10	Plekho1	0.0929714	5.77549	1.79868	0.192827	0.271624
	ENSMUSG00000015747.6	Vps45	0.0405408	3.61052	0.331543	0.570284	0.653557
	ENSMUSG00000015748.14	Prpf3	0.0912241	4.77735	4.4407	0.0460773	0.0811349
	ENSMUSG00000015749.13	Anp32e	0.0670709	6.59773	1.41928	0.245541	0.332866
	ENSMUSG00000023249.16	Parp3	0.656162	6.46881	128.046	6.18023e-11	2.7682e-09
	ENSMUSG00000042842.12	Serpinb6b	0.656021	7.14235	150.517	1.22248e-11	7.10628e-10
	ENSMUSG00000015757.11	Ppil4	0.00383488	5.53843	0.0102176	0.920352	0.941656
	ENSMUSG00000069792.6	Wfdc17	0.655062	2.63907	9.48581	0.00525046	0.012666
	ENSMUSG00000015766.15	Eps8	0.047177	5.32264	1.98667	0.171925	0.246826
	ENSMUSG00000015776.13	Med22	0.067742	5.95605	1.91225	0.179851	0.256243
	ENSMUSG00000015790.17	Surf1	-0.0902696	5.27772	5.49279	0.0280021	0.0530504
	ENSMUSG00000044716.13	Dok7	0.654105	0.843703	11.2359	0.00273272	0.00723703
	ENSMUSG00000037095.9	Lrg1	0.65339	6.5065	17.8315	0.00031698	0.00114117
	ENSMUSG00000020974.7	Pole2	0.652896	0.967285	17.3359	0.000367512	0.00129963
	ENSMUSG00000015837.16	Sqstm1	0.0780334	8.78585	3.16675	0.0882276	0.141027
	ENSMUSG00000043702.10	Pde12	0.652812	4.15614	115.424	1.71444e-10	6.41591e-09
	ENSMUSG00000015843.11	Rxrg	0.248467	0.864139	1.06487	0.312722	0.404477
	ENSMUSG00000015846.16	Rxra	0.0119256	6.93493	0.0603766	0.808058	0.852674
	ENSMUSG00000086813.3	Gm13657	0.652068	-0.124792	5.98221	0.0224255	0.0439704
	ENSMUSG00000015852.14	Fcrls	-0.0092201	3.42078	0.00693624	0.934339	0.952101
	ENSMUSG00000015854.8	Cd5l	1.20037	-0.483444	1.71283	0.203408	0.284119
	ENSMUSG00000025408.16	ENSMUSG00000025408.16	0.651725	4.39858	50.9903	2.66924e-07	2.78735e-06
	ENSMUSG00000015880.14	Ncapg	0.250594	1.25401	0.8408	0.368582	0.462457
	ENSMUSG00000015882.19	Lcorl	-0.100231	3.01717	0.516221	0.479616	0.569641
	ENSMUSG00000015889.9	Lta4h	-0.0488662	5.99412	1.22743	0.279236	0.368993
	ENSMUSG00000018171.10	Vmp1	0.651549	6.64548	104.088	4.65845e-10	1.44536e-08
	ENSMUSG00000015937.16	Macroh2a1	-0.00754214	6.59203	0.0458632	0.832292	0.872728
	ENSMUSG00000015942.10	Gtf2ird2	-0.0652934	3.71851	1.4153	0.246184	0.333468
	ENSMUSG00000015943.12	Bola1	-0.0760844	3.29348	0.676385	0.419189	0.512029
	ENSMUSG00000021871.20	Gm49342	0.650659	3.57578	15.0782	0.000740155	0.00236143
	ENSMUSG00000118161.2	Rps2-ps8	0.649701	1.62459	11.5354	0.00245354	0.00660399
	ENSMUSG00000015950.14	Ncf1	-0.114795	5.42421	2.66589	0.115991	0.177529
	ENSMUSG00000047714.15	Ppp1r2	0.649628	7.63076	81.3071	4.71274e-09	9.74917e-08
	ENSMUSG00000015961.9	Adss	0.0200421	6.0334	0.260913	0.61431	0.692767
	ENSMUSG00000009772.16	Nuak2	0.649415	4.53824	86.2782	2.73038e-09	6.19988e-08
	ENSMUSG00000068566.14	Myadm	0.648175	8.50563	126.736	6.84219e-11	2.99574e-09
	ENSMUSG00000015970.20	Chdh	-0.222683	2.11077	1.2794	0.269542	0.358654
	ENSMUSG00000055148.8	Klf2	0.648146	7.20534	34.7928	4.95778e-06	3.27123e-05
	ENSMUSG00000015980.15	Lrrc27	0.0494542	2.05741	0.134147	0.717483	0.780207
	ENSMUSG00000015981.13	Stk32c	0.0855503	0.672931	0.348939	0.581861	0.663989
	ENSMUSG00000015994.11	Fnta	-0.00220309	6.055	0.00446542	0.947293	0.961818
	ENSMUSG00000016018.5	Mtrex	-0.0135899	5.91613	0.105743	0.747952	0.804759
	ENSMUSG00000073676.5	Hspe1	0.647735	4.92643	171.534	3.21726e-12	2.47634e-10
	ENSMUSG00000038866.16	Zcchc2	0.647531	5.50389	152.069	1.10168e-11	6.49062e-10
	ENSMUSG00000030782.18	Tgfb1i1	0.647038	6.90805	87.5855	2.37517e-09	5.54493e-08
	ENSMUSG00000036282.16	Naa30	0.646233	4.54434	16.5378	0.000468341	0.00159613
	ENSMUSG00000016181.11	Utp25	-0.0183404	3.92031	0.0920712	0.764259	0.817734
	ENSMUSG00000028063.16	Lmna	0.646118	7.2661	98.5228	7.86873e-10	2.24955e-08
	ENSMUSG00000016200.15	Syt14	0.0118389	0.421131	0.0029077	0.957457	0.969016
	ENSMUSG00000024259.10	Slc25a46	0.646027	5.24522	61.262	5.77596e-08	7.70083e-07
	ENSMUSG00000029661.17	Col1a2	0.645755	8.77777	31.1316	1.07904e-05	6.29131e-05
	ENSMUSG00000016252.8	Atp5e	-0.0271421	6.20532	0.221545	0.642251	0.716951
	ENSMUSG00000016253.13	Nelfcd	-0.0728052	5.24662	2.08614	0.161983	0.234952
	ENSMUSG00000033972.10	Zfp944	0.645312	3.08197	18.8112	0.00023796	0.000892425
	ENSMUSG00000045322.11	Tlr9	0.644311	3.21768	13.9818	0.00105756	0.00320687
	ENSMUSG00000070284.11	Gmppb	0.642564	4.33311	129.85	5.37918e-11	2.47513e-09
	ENSMUSG00000016520.8	Lnx2	0.642084	5.77818	138.556	2.81563e-11	1.45702e-09
	ENSMUSG00000016283.14	H2-M2	-0.0971931	1.18336	0.138352	0.713293	0.776668
	ENSMUSG00000036381.14	P2ry14	0.641671	4.03005	62.822	4.6552e-08	6.44714e-07
	ENSMUSG00000024737.3	Slc15a3	0.641192	5.02798	65.3451	3.31142e-08	4.86503e-07
	ENSMUSG00000016344.15	Ppdpf	-0.0945605	5.37756	3.32107	0.0812847	0.131679
	ENSMUSG00000016349.11	Eef1a2	0.226273	3.61371	0.784297	0.384898	0.478727
	ENSMUSG00000016356.19	Col20a1	-0.0755937	2.44648	0.671593	0.420818	0.513803
	ENSMUSG00000016382.16	Pls3	0.0892929	7.97474	3.11081	0.0909116	0.144575
	ENSMUSG00000041889.8	Shisa4	0.640992	2.554	37.7193	2.75982e-06	1.97491e-05
	ENSMUSG00000074345.5	Tnfaip8l3	0.640487	2.47585	30.897	1.13626e-05	6.57878e-05
	ENSMUSG00000016427.8	Ndufa1	0.12694	4.56222	4.42187	0.0465031	0.0817672
	ENSMUSG00000002983.18	Relb	0.640251	5.04245	80.0738	5.41813e-09	1.09486e-07
	ENSMUSG00000016477.19	E2f3	0.168768	3.4914	3.33208	0.080814	0.13105
	ENSMUSG00000016481.16	Cr1l	0.00860218	6.52823	0.0604372	0.807963	0.852652
	ENSMUSG00000027335.10	Adra1d	0.638943	1.45054	11.9293	0.0021329	0.00587053
	ENSMUSG00000016493.14	Cd46	-0.2102	2.872	3.14015	0.0894925	0.142734
	ENSMUSG00000106895.2	Gm4754	0.637071	1.66955	14.3428	0.000939083	0.00290315
	ENSMUSG00000016495.13	Plgrkt	0.00358026	5.51463	0.00817409	0.928735	0.947646
	ENSMUSG00000051790.16	Nlgn2	0.636899	6.22063	117.487	1.44196e-10	5.60051e-09
	ENSMUSG00000015134.16	Aldh1a3	0.636798	0.936862	10.2202	0.00397188	0.00996771
	ENSMUSG00000016503.19	Gtf3a	0.0272621	4.62508	0.262203	0.61344	0.691965
	ENSMUSG00000016510.12	Mtif3	-0.119722	4.08771	3.92974	0.0593775	0.100806
	ENSMUSG00000013367.6	Iglon5	0.636092	-0.166202	9.33019	0.00557583	0.0133439
	ENSMUSG00000016526.9	Dyrk3	0.249414	2.54033	4.5126	0.0444914	0.0788458
	ENSMUSG00000032725.11	Folr2	0.635549	2.625	21.7747	0.000104277	0.0004401
	ENSMUSG00000024810.17	Il33	0.63548	6.54685	87.8689	2.30498e-09	5.41004e-08
	ENSMUSG00000016541.11	Atxn10	0.0130691	7.15515	0.0977302	0.757357	0.812672
	ENSMUSG00000108084.3	Gm7932	0.635093	0.364247	5.82912	0.0240243	0.0465563
	ENSMUSG00000046688.15	Tifa	0.634038	3.60273	23.1638	7.22571e-05	0.000321288
	ENSMUSG00000024349.11	Sting1	0.633864	5.01308	48.0526	4.30438e-07	4.15407e-06
	ENSMUSG00000016619.11	Nup50	0.0602778	5.56081	1.77771	0.195347	0.274575
	ENSMUSG00000018569.13	Cldn7	0.632614	5.25748	71.5752	1.48724e-08	2.51075e-07
	ENSMUSG00000016637.8	Ift27	0.108888	4.06394	2.81273	0.106914	0.165731
	ENSMUSG00000037722.9	Gnpnat1	0.631994	3.91791	35.6872	4.13186e-06	2.80195e-05
	ENSMUSG00000104671.2	Gm43062	0.631611	-0.218455	7.09724	0.013788	0.0289348
	ENSMUSG00000016757.12	Ttll12	0.0918612	4.55639	2.64346	0.117455	0.179361
	ENSMUSG00000016758.5	Bik	-0.00832485	3.22444	0.00525559	0.942828	0.958716
	ENSMUSG00000046791.9	Riox1	0.631161	4.46201	60.8993	6.07655e-08	8.05847e-07
	ENSMUSG00000028035.14	Dnajb4	0.630985	6.25431	110.019	2.73174e-10	9.28631e-09
	ENSMUSG00000016833.15	Mrps18c	0.0813617	3.71035	1.77429	0.195762	0.27507
	ENSMUSG00000016918.16	Sulf1	-0.0946303	5.92298	2.48604	0.12837	0.193286
	ENSMUSG00000018986.11	Slfn3	0.629845	1.64244	16.4484	0.000481387	0.00163357
	ENSMUSG00000022674.16	Ube2v2	0.629842	4.47001	27.4093	2.52197e-05	0.000130351
	ENSMUSG00000033863.3	Klf9	0.629019	7.58731	56.7091	1.11041e-07	1.33732e-06
	ENSMUSG00000027230.10	Creb3l1	0.628863	5.12403	50.4804	2.89596e-07	2.97487e-06
	ENSMUSG00000016984.8	Etaa1	0.0438296	3.46613	0.163925	0.689269	0.75646
	ENSMUSG00000016995.18	Matn4	0.0577014	6.13583	0.623211	0.437833	0.529425
	ENSMUSG00000017002.15	Slpi	0.132817	4.07153	0.796296	0.381346	0.475416
	ENSMUSG00000017007.10	Rbpjl	-0.0481526	6.4096	0.456099	0.506114	0.594192
	ENSMUSG00000054863.10	Tafa5	0.628474	0.630762	9.52174	0.00517835	0.012525
	ENSMUSG00000028719.9	Cmpk1	0.627037	5.46793	35.8989	3.9591e-06	2.69909e-05
	ENSMUSG00000021824.14	Ap3m1	0.626693	6.52104	91.2103	1.62767e-09	4.04921e-08
	ENSMUSG00000038400.16	Pmepa1	0.625498	6.13901	58.8283	8.15379e-08	1.02816e-06
	ENSMUSG00000017144.9	Rnd3	-0.0900724	4.69611	1.91152	0.179931	0.256337
	ENSMUSG00000017146.13	Brca1	-0.461083	1.3073	4.99876	0.0352481	0.0646635
	ENSMUSG00000003814.9	Calr	0.624318	9.18793	126.714	6.85418e-11	2.99574e-09
	ENSMUSG00000017176.18	Nt5c3b	-0.0517448	4.51874	0.975465	0.333488	0.426605
	ENSMUSG00000112627.3	4933412E12Rik	0.623894	3.20071	35.7005	4.12076e-06	2.79727e-05
	ENSMUSG00000017210.15	Med24	-0.0309454	5.47197	0.528058	0.474677	0.56516
	ENSMUSG00000092283.2	Gm20412	0.623548	4.1212	17.5146	0.000348346	0.00123849
	ENSMUSG00000017264.17	Exosc10	-0.00688341	5.77247	0.0330942	0.857224	0.891527
	ENSMUSG00000042812.6	Foxf1	0.622727	8.05678	79.3953	5.85454e-09	1.16417e-07
	ENSMUSG00000017288.16	Vps53	0.0312135	5.2056	0.649998	0.428283	0.520632
	ENSMUSG00000021922.18	Itih4	0.622418	6.61314	38.5151	2.36527e-06	1.73238e-05
	ENSMUSG00000003198.11	Zfp959	0.621553	3.19867	25.2709	4.23341e-05	0.000203434
	ENSMUSG00000017307.17	Acot8	-0.051918	3.62862	0.624435	0.437389	0.529072
	ENSMUSG00000017309.12	Cd300lg	-0.26785	4.73559	2.9841	0.0973482	0.152956
	ENSMUSG00000005338.15	Cadm3	0.621133	1.51285	8.36542	0.00816155	0.0185109
	ENSMUSG00000017344.5	Vtn	0.1135	4.71189	3.16743	0.0881958	0.140989
	ENSMUSG00000017376.16	Nlk	-0.0120218	5.19734	0.0234288	0.879668	0.909248
	ENSMUSG00000078486.4	Perm1	0.619142	3.03659	16.9548	0.000412335	0.00143285
	ENSMUSG00000117438.2	Rpsa-ps7	0.618274	2.71231	38.8548	2.21595e-06	1.63885e-05
	ENSMUSG00000028261.14	Ndufaf4	0.617042	3.78717	45.5934	6.5237e-07	5.82821e-06
	ENSMUSG00000120949.1	ENSMUSG00000120949.1	0.617003	1.98752	7.45614	0.0118519	0.0254037
	ENSMUSG00000017405.15	Nek8	-0.0386316	3.93214	0.46697	0.501138	0.589341
	ENSMUSG00000017412.16	Cacnb4	-0.124416	0.539161	0.343827	0.563278	0.647443
	ENSMUSG00000017417.15	Plxdc1	-0.0302293	4.66619	0.210003	0.651019	0.724051
	ENSMUSG00000041801.6	Phlda3	0.61655	5.66077	61.5805	5.5253e-08	7.41768e-07
	ENSMUSG00000029817.12	Tra2a	0.616283	6.39835	67.9715	2.34705e-08	3.6643e-07
	ENSMUSG00000028893.9	Sesn2	0.615878	4.56285	130.878	4.97373e-11	2.33164e-09
	ENSMUSG00000017446.15	C1qtnf1	-0.032366	5.43638	0.28492	0.598561	0.678937
	ENSMUSG00000074406.6	Zfp628	0.615571	4.47954	87.1429	2.48946e-09	5.75017e-08
	ENSMUSG00000017466.10	ENSMUSG00000017466.10	0.0668204	9.68607	3.17333	0.0879181	0.140635
	ENSMUSG00000071847.14	Apcdd1	0.615154	4.12385	50.8866	2.71371e-07	2.82534e-06
	ENSMUSG00000082088.2	Gm15753	0.615001	1.88321	21.9194	0.000100312	0.000425113
	ENSMUSG00000017491.10	Rarb	-0.254287	2.41208	4.82258	0.0383225	0.0693826
	ENSMUSG00000031367.16	Ap1s2	0.614815	4.63417	20.7228	0.000138794	0.000564991
	ENSMUSG00000017499.16	Cdc6	0.103492	1.4837	0.292156	0.593983	0.674774
	ENSMUSG00000017548.16	Suz12	0.0690241	5.47915	0.850071	0.366001	0.460013
	ENSMUSG00000037443.14	Cep85	0.61459	6.33605	7.62651	0.0110396	0.0239154
	ENSMUSG00000072941.6	Sod3	0.614588	9.00252	87.3475	2.4359e-09	5.66396e-08
	ENSMUSG00000039285.13	Azi2	0.613434	6.13321	168.273	3.91912e-12	2.896e-10
	ENSMUSG00000031246.15	Sh3bgrl	0.61268	7.44019	19.3938	0.000201349	0.000773761
	ENSMUSG00000024732.8	Ccdc86	0.612486	4.01529	90.8308	1.6924e-09	4.16862e-08
	ENSMUSG00000044231.4	Nhlrc1	0.611616	2.68151	40.204	1.7164e-06	1.31227e-05
	ENSMUSG00000039903.19	Eva1c	0.610746	3.68141	61.8114	5.3509e-08	7.21689e-07
	ENSMUSG00000017664.17	Slc35c2	-0.0116975	5.08686	0.0788204	0.781385	0.832412
	ENSMUSG00000028796.18	Phc2	0.610494	7.11996	192.56	9.71261e-13	9.25564e-11
	ENSMUSG00000017670.17	Elmo2	-0.0164692	6.63777	0.136164	0.715463	0.778351
	ENSMUSG00000017677.12	Wsb1	0.11015	6.59029	2.21057	0.150503	0.221305
	ENSMUSG00000120926.1	ENSMUSG00000120926.1	0.610259	2.70958	50.0929	3.08229e-07	3.12694e-06
	ENSMUSG00000032487.9	Ptgs2	0.610188	3.66844	18.4618	0.000263359	0.000976759
	ENSMUSG00000110010.2	Gm45629	0.610042	0.216031	9.74842	0.00474766	0.0116089
	ENSMUSG00000017697.4	Ada	0.130388	1.74007	0.378282	0.544497	0.630134
	ENSMUSG00000063275.16	Hacd1	0.609087	2.30691	24.5987	5.00703e-05	0.0002343
	ENSMUSG00000017713.10	Tha1	0.0648873	3.15557	0.3714	0.548151	0.633648
	ENSMUSG00000042821.8	Snai1	0.608574	4.68328	40.9235	1.50121e-06	1.17555e-05
	ENSMUSG00000017716.16	Birc5	-0.0546926	2.42673	0.052099	0.821446	0.863848
	ENSMUSG00000017718.16	Afmid	-0.0537052	2.56164	0.187903	0.668663	0.738634
	ENSMUSG00000114835.2	Gm48194	0.608493	0.802104	18.0208	0.000299723	0.00108916
	ENSMUSG00000017723.12	Wfdc2	-0.00557094	9.01209	0.00578279	0.940034	0.9566
	ENSMUSG00000017734.16	Dbndd2	0.0776168	5.4627	2.78708	0.108438	0.167631
	ENSMUSG00000017737.3	Mmp9	-0.161991	4.24058	1.24655	0.275618	0.365098
	ENSMUSG00000042784.10	Muc1	0.608095	8.4207	97.7229	8.5013e-10	2.38351e-08
	ENSMUSG00000017747.14	Ghdc	0.0650578	4.41731	1.33814	0.259109	0.347344
	ENSMUSG00000024146.10	Cript	0.607975	4.98849	41.7361	1.29286e-06	1.03803e-05
	ENSMUSG00000067931.7	Zfp948	0.607708	3.98769	35.5331	4.26277e-06	2.87799e-05
	ENSMUSG00000017760.17	Ctsa	-0.0303697	7.58	0.601374	0.44587	0.537133
	ENSMUSG00000094388.2	Gm8783	0.606454	1.79068	37.8895	2.66978e-06	1.91993e-05
	ENSMUSG00000096592.2	Gm15801	0.606454	1.79068	37.8895	2.66978e-06	1.91993e-05
	ENSMUSG00000017774.20	Myo1c	-0.0231493	8.87667	0.355661	0.556688	0.641512
	ENSMUSG00000051341.7	Zfp52	0.606445	3.04653	17.6854	0.00033104	0.00118421
	ENSMUSG00000017778.15	Cox7c	0.104008	5.66047	3.25798	0.0840443	0.135407
	ENSMUSG00000016458.16	Wt1	0.605237	1.96216	14.6333	0.000854268	0.00267749
	ENSMUSG00000082361.7	Btc	0.604062	2.04228	19.5937	0.000190235	0.000737881
	ENSMUSG00000070392.6	Gm20634	0.603944	3.52058	20.7208	0.000138872	0.000565045
	ENSMUSG00000028351.6	Brinp1	0.603929	1.90724	37.6506	2.79708e-06	1.99829e-05
	ENSMUSG00000026761.13	Orc4	0.603794	4.43592	33.102	7.0537e-06	4.39948e-05
	ENSMUSG00000068758.9	Il3ra	0.603561	4.14054	65.0282	3.45426e-08	5.04542e-07
	ENSMUSG00000043091.10	Tuba1c	0.603216	5.98916	63.7536	4.10027e-08	5.81966e-07
	ENSMUSG00000017843.15	Ppp2r5c	-0.00776253	6.89771	0.0432908	0.83699	0.876548
	ENSMUSG00000007617.19	Homer1	0.602897	2.75601	21.6851	0.000106817	0.00044984
	ENSMUSG00000017861.12	Mybl2	0.134912	2.14211	1.08235	0.308871	0.400535
	ENSMUSG00000017897.19	Eya2	0.0947959	5.48229	4.88456	0.0372078	0.0676256
	ENSMUSG00000040253.16	Gbp7	0.6018	5.95796	10.7535	0.00325835	0.00840818
	ENSMUSG00000006445.4	Epha2	0.601291	6.5213	139.307	2.66726e-11	1.38849e-09
	ENSMUSG00000017978.19	Cadps2	-0.0657103	5.10768	1.45962	0.239135	0.325599
	ENSMUSG00000017999.17	Ddx27	0.0923131	5.0248	4.1709	0.0526238	0.0908441
	ENSMUSG00000024966.10	Stip1	0.601009	6.2497	59.8575	7.03869e-08	9.12622e-07
	ENSMUSG00000018008.9	Cyth4	0.0880605	5.99392	1.18616	0.287266	0.377232
	ENSMUSG00000059013.13	Sh2d3c	0.600812	6.99553	131.414	4.77578e-11	2.28943e-09
	ENSMUSG00000028982.10	Slc25a33	0.600611	2.91331	51.3827	2.50787e-07	2.65381e-06
	ENSMUSG00000018042.19	Cyb5r3	0.0382384	8.61596	0.600827	0.446075	0.537305
	ENSMUSG00000018068.14	Ints2	-0.0186374	3.49621	0.0814552	0.777862	0.829215
	ENSMUSG00000022591.6	Gm9747	0.599821	4.27888	40.6833	1.56959e-06	1.22088e-05
	ENSMUSG00000018102.6	H2bc4	0.123011	5.69155	3.10002	0.0914402	0.145309
	ENSMUSG00000023944.15	Hsp90ab1	0.599775	10.2531	119.944	1.17741e-10	4.7202e-09
	ENSMUSG00000018160.16	Med1	-0.00791474	5.63264	0.0424382	0.83858	0.877627
	ENSMUSG00000067235.15	H2-Q10	0.599541	3.84093	5.91346	0.0231283	0.0450509
	ENSMUSG00000114267.2	Gm48600	0.598821	-0.323635	6.95808	0.0146307	0.0304397
	ENSMUSG00000020407.14	Upp1	0.598377	3.45023	33.741	6.16576e-06	3.93207e-05
	ENSMUSG00000115602.2	Gm7908	0.598173	0.928812	6.36321	0.0189363	0.0380318
	ENSMUSG00000037216.6	Lipt1	0.598166	2.23276	44.9101	7.34256e-07	6.44099e-06
	ENSMUSG00000022951.18	ENSMUSG00000022951.18	0.598148	5.75745	104.232	4.59733e-10	1.42911e-08
	ENSMUSG00000018196.19	Glrx2	-0.0457559	4.72232	0.825055	0.373025	0.467058
	ENSMUSG00000018199.10	Ro60	0.143316	4.91504	0.807909	0.377954	0.472076
	ENSMUSG00000024777.11	Ppp2r5b	0.597559	5.6174	92.7051	1.3977e-09	3.62241e-08
	ENSMUSG00000018217.13	Pmp22	0.0881146	9.12307	2.68681	0.114644	0.175737
	ENSMUSG00000018238.7	Gdf9	0.163811	0.0598632	0.577919	0.454769	0.545742
	ENSMUSG00000018239.10	Zcchc10	0.00955435	2.70728	0.00886821	0.92578	0.945626
	ENSMUSG00000063954.8	H2ac19	0.597268	3.66287	18.3668	0.000270764	0.000999335
	ENSMUSG00000054404.14	Slfn5	0.595864	7.683	66.1794	2.96514e-08	4.45767e-07
	ENSMUSG00000019359.15	Gdpd2	0.595796	3.81127	21.4189	0.000114774	0.000478725
	ENSMUSG00000032501.10	Trib1	0.595221	5.7656	134.624	3.75509e-11	1.871e-09
	ENSMUSG00000018322.11	Tomm34	0.077564	5.45561	2.80968	0.107094	0.165906
	ENSMUSG00000102211.2	Gm37490	0.595219	-0.330226	5.80888	0.024245	0.046937
	ENSMUSG00000032135.16	Mcam	0.594806	8.21535	75.5485	9.17469e-09	1.69131e-07
	ENSMUSG00000027358.7	Bmp2	0.594407	2.70114	41.5521	1.33712e-06	1.06865e-05
	ENSMUSG00000042246.6	Tmc7	0.594196	1.70873	30.4359	1.25863e-05	7.18472e-05
	ENSMUSG00000018341.13	Il12rb2	-0.0856282	1.10342	0.228847	0.636848	0.712516
	ENSMUSG00000018347.17	Zkscan6	0.0677576	3.93195	1.23698	0.277422	0.366957
	ENSMUSG00000038344.15	Txlng	0.592924	4.84554	36.2671	3.67704e-06	2.53554e-05
	ENSMUSG00000018363.17	Smurf2	-0.0208737	7.0517	0.129633	0.722063	0.784055
	ENSMUSG00000033287.18	Kctd17	0.592899	4.995	139.897	2.5565e-11	1.33882e-09
	ENSMUSG00000018377.11	Vezf1	8.00798e-05	6.79674	3.86824e-06	0.998448	0.999029
	ENSMUSG00000020646.18	Mboat2	0.592723	2.40854	7.31507	0.0125746	0.0267522
	ENSMUSG00000053846.6	Lipg	0.592613	6.53898	130.671	5.05292e-11	2.35752e-09
	ENSMUSG00000060950.13	Trmt61a	0.592467	2.95523	40.4528	1.63842e-06	1.26539e-05
	ENSMUSG00000027959.15	Sass6	0.592426	2.24092	17.5526	0.000344408	0.00122549
	ENSMUSG00000052192.6	Gm5963	0.590955	-0.295131	6.08556	0.0214132	0.0422761
	ENSMUSG00000018398.19	Septin8	-0.0698191	6.9342	1.96283	0.174416	0.249725
	ENSMUSG00000018401.18	Mtmr4	0.0524798	5.90973	1.15767	0.292987	0.383692
	ENSMUSG00000018405.8	Mrm1	0.009609	3.29815	0.0138756	0.907242	0.931218
	ENSMUSG00000044595.11	Dnd1	0.59063	0.379635	7.96162	0.00961517	0.0212602
	ENSMUSG00000061080.12	Lsamp	0.58973	0.228813	10.9942	0.00298344	0.00780149
	ENSMUSG00000018415.15	Gid4	-0.0359962	6.33685	0.365652	0.55124	0.636459
	ENSMUSG00000004846.11	Plod3	0.589551	6.53537	117.754	1.4104e-10	5.52717e-09
	ENSMUSG00000018425.19	Dhx40	0.0237487	5.65357	0.381402	0.542856	0.628693
	ENSMUSG00000055116.9	Arntl	0.589394	4.65676	15.8767	0.000574866	0.00190049
	ENSMUSG00000018428.16	Akap1	-0.0929543	5.34432	2.28564	0.14405	0.213105
	ENSMUSG00000018433.15	Nol11	0.0497885	4.54703	1.76681	0.196674	0.276192
	ENSMUSG00000006378.16	ENSMUSG00000006378.16	0.58922	2.81546	26.7987	2.91697e-05	0.000147703
	ENSMUSG00000018446.9	C1qbp	0.113448	4.90646	5.11807	0.0333233	0.0616316
	ENSMUSG00000018449.13	Rpain	0.0498872	3.73538	0.706161	0.40928	0.502035
	ENSMUSG00000001128.8	Cfp	0.589212	4.46346	20.1809	0.000161288	0.000641583
	ENSMUSG00000018459.16	Slc13a3	-0.189817	2.15814	1.71462	0.203179	0.283886
	ENSMUSG00000018470.9	Kcnab3	-0.456502	0.347803	3.98113	0.0578597	0.0984982
	ENSMUSG00000040511.15	Pvr	0.589043	5.44924	84.7463	3.22172e-09	7.1299e-08
	ENSMUSG00000018476.8	Kdm6b	0.0566458	6.75854	1.05882	0.314071	0.40577
	ENSMUSG00000018481.10	Appbp2	0.0150718	5.62394	0.0938532	0.762061	0.816213
	ENSMUSG00000053907.11	Mat2a	0.588924	8.34293	22.9576	7.62442e-05	0.000337211
	ENSMUSG00000028108.17	Ecm1	0.588203	7.17458	145.752	1.69228e-11	9.19589e-10
	ENSMUSG00000018507.17	Trpv2	0.0954201	4.5273	2.23161	0.148661	0.218887
	ENSMUSG00000018509.9	Cenpv	0.0650117	2.83471	0.513201	0.480891	0.570765
	ENSMUSG00000018537.17	Pcgf2	0.0667412	5.10423	1.91763	0.179264	0.255479
	ENSMUSG00000018541.11	Cwc25	0.014134	4.71416	0.120521	0.739707	0.797561
	ENSMUSG00000018547.9	Pip4k2b	0.0805207	5.84478	4.56867	0.0432973	0.077
	ENSMUSG00000018548.16	Trim37	-0.151837	4.7117	5.19791	0.0321009	0.0596556
	ENSMUSG00000018554.14	Ybx2	-0.385217	0.963278	3.35269	0.0799409	0.12984
	ENSMUSG00000063229.16	Ldha	0.587554	7.84095	117.372	1.45589e-10	5.64207e-09
	ENSMUSG00000042406.9	Atf4	0.587453	7.55983	106.386	3.77727e-10	1.21535e-08
	ENSMUSG00000034936.3	Arl4d	0.587385	5.89528	28.2876	2.05228e-05	0.000109382
	ENSMUSG00000018567.15	Gabarap	0.0666343	7.83667	3.92149	0.0596251	0.101142
	ENSMUSG00000022094.16	Slc39a14	0.58718	5.03304	81.9604	4.38003e-09	9.21391e-08
	ENSMUSG00000064341.1	mt-Nd1	0.58687	10.5043	15.5786	0.000631303	0.00206051
	ENSMUSG00000060639.6	H4c9	0.58679	0.0907686	6.00576	0.0221903	0.0435833
	ENSMUSG00000018574.15	Acadvl	0.0734525	6.37892	0.746281	0.39648	0.489606
	ENSMUSG00000018899.18	Irf1	0.586398	7.41314	30.1132	1.35275e-05	7.6618e-05
	ENSMUSG00000022146.13	Osmr	0.586326	6.52781	123.019	9.18009e-11	3.81171e-09
	ENSMUSG00000018585.10	Atox1	0.0872378	5.33599	2.77475	0.109179	0.168598
	ENSMUSG00000024736.16	Tmem132a	0.585324	4.92149	47.2708	4.90469e-07	4.63593e-06
	ENSMUSG00000018599.6	Mief2	0.0997553	4.16702	4.52244	0.0442791	0.0785139
	ENSMUSG00000018604.19	Tbx3	0.0709607	7.34813	1.08247	0.308843	0.400529
	ENSMUSG00000018648.16	Dusp14	-0.10882	5.19927	5.45885	0.0284427	0.0537975
	ENSMUSG00000034165.17	Ccnd3	0.585114	7.44669	186.499	1.35473e-12	1.21779e-10
	ENSMUSG00000018654.19	Ikzf1	-0.140672	5.48467	3.48107	0.0747407	0.122754
	ENSMUSG00000018659.13	Pnpo	-0.00199136	4.69119	0.000999962	0.975043	0.981629
	ENSMUSG00000018661.18	Cog1	0.0339131	5.73463	0.666324	0.422621	0.515462
	ENSMUSG00000018666.14	Cbx1	-0.0340281	5.902	1.03532	0.319384	0.411354
	ENSMUSG00000018669.15	Cdk5rap3	-0.0738113	5.12957	2.10643	0.160041	0.232656
	ENSMUSG00000018672.16	Copz2	0.0444018	4.45712	0.627575	0.436255	0.528102
	ENSMUSG00000017057.10	Il13ra1	0.584971	5.73168	65.6317	3.18777e-08	4.71115e-07
	ENSMUSG00000110350.2	Gm10252	0.584755	3.37043	9.22968	0.00579774	0.0137936
	ENSMUSG00000018697.15	Aatf	-0.0467645	3.80637	0.389464	0.538656	0.624867
	ENSMUSG00000044813.16	Shb	0.584641	5.07434	103.114	5.09745e-10	1.54929e-08
	ENSMUSG00000018733.11	Pex12	0.0713296	3.51763	0.983225	0.331611	0.424844
	ENSMUSG00000022858.17	Tra2b	0.58325	6.26193	57.3446	1.0113e-07	1.23243e-06
	ENSMUSG00000018740.15	Slc25a35	0.191722	4.89303	4.92125	0.0365652	0.0666653
	ENSMUSG00000086918.3	4930429F24Rik	0.582847	1.52005	9.96464	0.00437324	0.0108223
	ENSMUSG00000018752.20	Tnfsfm13	-0.143934	4.42033	4.27628	0.0499492	0.0868979
	ENSMUSG00000046352.8	Gjb2	0.582201	2.56647	24.5593	5.05686e-05	0.000236425
	ENSMUSG00000117813.2	Gm5823	0.582014	1.76635	16.6186	0.000456863	0.00156282
	ENSMUSG00000061048.9	Cdh3	0.582009	1.09336	14.4481	0.000907331	0.00281999
	ENSMUSG00000018774.14	Cd68	0.203038	5.76322	4.74312	0.0398066	0.0716901
	ENSMUSG00000018776.11	Slc35g3	-0.446165	0.563292	2.14938	0.156021	0.227839
	ENSMUSG00000018796.14	Acsl1	0.00651021	6.45222	0.00121049	0.972542	0.979677
	ENSMUSG00000018800.15	Abca5	-0.17184	5.3167	3.09791	0.0915439	0.145435
	ENSMUSG00000033585.6	Ndn	0.581775	3.80893	42.3761	1.15086e-06	9.41804e-06
	ENSMUSG00000018819.11	Lsp1	-0.122143	7.17823	4.78663	0.0389862	0.0703955
	ENSMUSG00000026077.16	Npas2	0.581491	3.32575	12.6025	0.00168587	0.00479607
	ENSMUSG00000018821.4	Avpi1	0.101872	5.07997	4.47149	0.0453905	0.0801584
	ENSMUSG00000018822.8	Sfrp5	0.510663	0.877787	1.31523	0.263115	0.351714
	ENSMUSG00000097451.12	Rian	0.580934	3.17061	15.9478	0.000562219	0.00186292
	ENSMUSG00000024427.8	Spry4	0.579478	5.13407	43.7437	9.01034e-07	7.63515e-06
	ENSMUSG00000032643.13	Fhl3	0.579274	2.13985	35.1238	4.63284e-06	3.08721e-05
	ENSMUSG00000023988.9	Bysl	0.578198	4.49099	96.9052	9.2055e-10	2.52017e-08
	ENSMUSG00000032012.10	Nectin1	0.578074	5.61567	112.938	2.11926e-10	7.55784e-09
	ENSMUSG00000037126.17	Psd	0.578033	2.77094	40.7223	1.55826e-06	1.21261e-05
	ENSMUSG00000018858.16	Mrpl58	-0.021339	4.7942	0.224839	0.6398	0.714903
	ENSMUSG00000018861.9	Fdxr	-0.114044	3.08256	2.80041	0.107643	0.166594
	ENSMUSG00000018868.5	Pnpla5	-0.333656	0.148473	2.52949	0.125242	0.189296
	ENSMUSG00000018882.13	Mrpl45	-0.0859683	4.19681	2.16393	0.154688	0.226223
	ENSMUSG00000018893.16	Mb	-0.274431	6.06276	1.06552	0.312578	0.40441
	ENSMUSG00000118106.2	Gm54639	0.577597	-0.284446	5.76828	0.0246945	0.0477331
	ENSMUSG00000018900.8	Slc22a5	0.0700058	5.36932	0.907576	0.350558	0.444286
	ENSMUSG00000018906.15	P4ha2	0.0873439	5.74423	2.77099	0.109406	0.168874
	ENSMUSG00000037492.17	Zmat4	0.577436	1.44072	6.462	0.0181331	0.0366805
	ENSMUSG00000018916.6	Csf2	0.0392577	0.756605	0.0486454	0.827362	0.869074
	ENSMUSG00000035397.9	Klf16	0.576706	4.49983	53.5688	1.78261e-07	1.99275e-06
	ENSMUSG00000006442.11	Srm	0.576226	3.81048	42.1036	1.20914e-06	9.85338e-06
	ENSMUSG00000018923.14	Med11	0.107233	4.3363	2.26406	0.14587	0.215506
	ENSMUSG00000018924.7	Alox15	0.62048	2.15813	1.40084	0.248543	0.335895
	ENSMUSG00000018927.4	Ccl6	-0.122758	6.94926	0.585723	0.451777	0.542823
	ENSMUSG00000021266.17	Wars1	0.575152	7.54301	30.3604	1.27999e-05	7.28755e-05
	ENSMUSG00000018931.4	Natd1	-0.0923984	5.30683	2.99775	0.0966298	0.152074
	ENSMUSG00000018932.10	Map2k3	0.0383695	6.21337	0.797129	0.381101	0.475192
	ENSMUSG00000040774.16	Cept1	0.574916	5.83305	44.9897	7.24163e-07	6.36206e-06
	ENSMUSG00000018974.8	Sart3	0.0383858	5.52583	0.797795	0.380905	0.475049
	ENSMUSG00000002728.15	Naa20	0.574823	4.94797	104.048	4.67563e-10	1.44572e-08
	ENSMUSG00000078546.9	Zfp995	0.574619	1.82346	7.21859	0.0130968	0.0276843
	ENSMUSG00000018995.13	Nars2	0.07796	2.83247	0.725599	0.403002	0.495854
	ENSMUSG00000018999.15	Slc35b4	-0.000704649	5.43569	0.000270705	0.987013	0.990592
	ENSMUSG00000031294.10	D630029K05Rik	0.573038	1.0779	14.6398	0.000852474	0.00267331
	ENSMUSG00000030088.16	Aldh1l1	0.572925	4.78517	30.3421	1.28524e-05	7.31504e-05
	ENSMUSG00000019054.14	Fis1	0.0326026	6.3681	0.648946	0.428652	0.520887
	ENSMUSG00000038539.16	Atf5	0.572822	6.84346	48.4066	4.05918e-07	3.95906e-06
	ENSMUSG00000019066.14	Rab3d	-0.0882205	6.5613	4.07197	0.0552829	0.0946475
	ENSMUSG00000019080.9	Mfsd3	0.0670614	2.33325	0.452629	0.507721	0.595677
	ENSMUSG00000030042.16	Pole4	0.572754	4.31968	85.1916	3.06969e-09	6.83683e-08
	ENSMUSG00000026049.12	Tex30	0.572689	1.91537	17.6955	0.000330046	0.00118138
	ENSMUSG00000007476.19	Lrrc8a	0.572148	6.24547	101.408	5.97846e-10	1.76929e-08
	ENSMUSG00000019102.11	Aldh3a1	-0.350894	4.24895	2.41487	0.133695	0.200249
	ENSMUSG00000001774.9	Chordc1	0.571382	5.17527	107.369	3.45707e-10	1.12268e-08
	ENSMUSG00000093677.2	Gm20712	0.571359	0.616767	9.82179	0.0046168	0.0113406
	ENSMUSG00000068452.9	Duox2	0.571104	0.640687	11.3029	0.00266736	0.00708793
	ENSMUSG00000046186.9	Cd109	0.570977	1.44557	12.5831	0.00169723	0.00482366
	ENSMUSG00000019143.16	Hars2	-0.0364494	4.86847	0.808842	0.377683	0.47184
	ENSMUSG00000019158.10	Tmem160	0.160598	4.27104	3.83728	0.0622236	0.104832
	ENSMUSG00000039646.6	Vasn	0.570477	6.06326	84.7207	3.23074e-09	7.13948e-08
	ENSMUSG00000107017.2	Gm43196	0.570271	1.2703	12.2061	0.00193508	0.00540265
	ENSMUSG00000079508.9	Apoo	0.570169	2.61357	14.0883	0.00102098	0.00311275
	ENSMUSG00000025491.15	Ifitm1	0.570131	5.73289	33.6222	6.32126e-06	4.01444e-05
	ENSMUSG00000019189.14	Rnf145	-0.0429746	7.13893	1.51815	0.230214	0.315448
	ENSMUSG00000019194.16	Scn1b	-0.167706	3.5277	1.99531	0.171033	0.245642
	ENSMUSG00000106874.3	Gm20186	0.570022	7.07835	44.0796	8.4913e-07	7.2695e-06
	ENSMUSG00000019214.15	Chtf18	-0.148536	1.47096	1.04776	0.316557	0.408362
	ENSMUSG00000019235.10	Rps6kl1	-0.0354071	1.36594	0.094759	0.760953	0.815627
	ENSMUSG00000073274.6	Gm14636	0.569377	0.461141	7.09677	0.0137907	0.0289372
	ENSMUSG00000028458.13	Tesk1	0.56839	5.79202	215.907	2.92656e-13	3.56897e-11
	ENSMUSG00000028364.16	Tnc	0.568309	4.29836	6.83777	0.0154054	0.0318576
	ENSMUSG00000019278.6	Dpep1	0.0698099	7.43548	0.442898	0.512275	0.600092
	ENSMUSG00000019295.9	Tmem129	0.114447	5.14183	4.7341	0.0399792	0.0719576
	ENSMUSG00000019297.10	Nop9	0.0463785	4.37144	0.792687	0.382409	0.476413
	ENSMUSG00000024247.15	Pkdcc	0.568217	3.3553	31.752	9.42254e-06	5.62739e-05
	ENSMUSG00000019303.15	Psmc3ip	-0.0115808	2.18428	0.0084847	0.927398	0.946613
	ENSMUSG00000019312.11	Grb7	-0.1522	4.89724	4.48715	0.0450456	0.079642
	ENSMUSG00000019320.15	Noxo1	0.0238434	3.05742	0.0437187	0.836199	0.875824
	ENSMUSG00000072066.8	6720489N17Rik	0.567997	1.3928	6.96562	0.0145836	0.030349
	ENSMUSG00000107134.2	Gm42528	0.56779	3.20944	25.7111	3.79788e-05	0.00018547
	ENSMUSG00000037731.6	Themis2	0.567448	5.32684	43.2042	9.91745e-07	8.27514e-06
	ENSMUSG00000024330.18	Col11a2	0.567371	1.63757	20.436	0.000150243	0.000602319
	ENSMUSG00000021700.11	Rab3c	0.567175	0.926184	8.41781	0.00799141	0.0181935
	ENSMUSG00000025225.16	Nfkb2	0.567045	5.83023	80.7224	5.03388e-09	1.03399e-07
	ENSMUSG00000049969.4	Plekhf2	0.566851	5.65334	99.4745	7.18188e-10	2.0909e-08
	ENSMUSG00000028793.16	Rnf19b	0.566572	5.62816	65.1326	3.4065e-08	4.98791e-07
	ENSMUSG00000019432.16	Ddx39b	0.0659612	7.79542	2.46995	0.129552	0.194797
	ENSMUSG00000026822.15	Lcn2	0.566459	7.30277	7.09729	0.0137877	0.0289348
	ENSMUSG00000019437.18	Tlcd1	0.00168546	4.3111	0.000488935	0.982547	0.987019
	ENSMUSG00000039476.14	Prrx2	0.566185	-0.0843625	5.9658	0.0225911	0.0442528
	ENSMUSG00000026893.5	Gca	0.565359	3.83983	36.2969	3.65522e-06	2.52249e-05
	ENSMUSG00000032997.17	Chpf	0.56462	5.88436	73.4008	1.18824e-08	2.08049e-07
	ENSMUSG00000019470.13	Xab2	0.00474298	5.96034	0.0155004	0.901989	0.927027
	ENSMUSG00000019471.11	Cdc37	0.0157851	7.14339	0.189784	0.667114	0.737506
	ENSMUSG00000019478.18	Rab4a	-0.143183	2.81561	2.13205	0.157628	0.229763
	ENSMUSG00000118057.2	B020010K11Rik	0.56436	3.67093	42.449	1.1358e-06	9.31227e-06
	ENSMUSG00000032578.8	Cish	0.563445	6.1911	68.6284	2.15685e-08	3.435e-07
	ENSMUSG00000045284.10	Dcaf12l1	0.563421	-0.231606	7.11468	0.0136862	0.0287593
	ENSMUSG00000115018.3	ENSMUSG00000115018.3	0.562913	3.53287	31.8956	9.13359e-06	5.47351e-05
	ENSMUSG00000019528.19	Gyg	-0.0177563	7.32368	0.0514288	0.822577	0.864725
	ENSMUSG00000030878.12	Cdr2	0.562681	5.26409	105.435	4.11779e-10	1.30253e-08
	ENSMUSG00000015733.14	Capza2	0.562135	7.07106	69.7449	1.87085e-08	3.06665e-07
	ENSMUSG00000026826.14	Nr4a2	0.56188	3.18127	11.2172	0.00275128	0.00728286
	ENSMUSG00000019577.7	Pdk4	0.346472	5.06616	0.989216	0.330172	0.423373
	ENSMUSG00000019578.12	Ubxn6	0.0208651	5.88793	0.331181	0.570492	0.65371
	ENSMUSG00000053347.16	Zfp943	0.561431	4.09501	10.1371	0.00409779	0.010237
	ENSMUSG00000027364.15	Usp50	0.561342	1.1493	10.8879	0.00310164	0.00805862
	ENSMUSG00000019647.17	Sema6a	0.101117	6.64642	2.43128	0.132444	0.198666
	ENSMUSG00000019659.9	Ccdc12	0.0413203	5.42369	0.98098	0.332153	0.425368
	ENSMUSG00000019689.5	Fmc1	-0.00320165	3.31094	0.00296023	0.992057	0.994337
	ENSMUSG00000041571.11	Selenow	0.561118	6.90389	138.222	2.88463e-11	1.48832e-09
	ENSMUSG00000019710.14	Mrpl24	-0.00726259	6.01144	0.0322743	0.858983	0.892718
	ENSMUSG00000019715.15	Gle1	-0.0138643	5.85491	0.0943568	0.761444	0.815803
	ENSMUSG00000019718.9	L3hypdh	-0.159625	2.3014	1.27806	0.269788	0.358846
	ENSMUSG00000067121.3	Gm7027	0.561028	2.88819	40.9518	1.49337e-06	1.17152e-05
	ENSMUSG00000031422.17	Morf4l2	0.560781	7.11329	142.501	2.12406e-11	1.11908e-09
	ENSMUSG00000019732.15	Calr3	-0.281631	0.463741	2.09832	0.160814	0.233528
	ENSMUSG00000105813.2	Gm42928	0.56053	0.687984	8.71005	0.00711116	0.0164145
	ENSMUSG00000091119.3	Ccdc152	0.559982	0.623995	7.13839	0.0135492	0.0284961
	ENSMUSG00000019738.16	Polr2i	-0.0666697	3.65809	1.35248	0.256642	0.34462
	ENSMUSG00000019761.11	Krt10	-0.0605314	1.59607	0.239594	0.629085	0.70596
	ENSMUSG00000058952.13	Cfi	0.559713	-0.44006	7.56729	0.0113147	0.0244145
	ENSMUSG00000019763.12	Rmnd1	0.0255805	3.83295	0.130523	0.721152	0.783342
	ENSMUSG00000070462.5	Tlnrd1	0.558778	6.169	46.1043	5.97638e-07	5.45094e-06
	ENSMUSG00000019768.17	Esr1	0.343897	1.42817	2.16878	0.154247	0.225701
	ENSMUSG00000019773.8	Fbxo5	-0.059633	2.42401	0.3674	0.550297	0.635623
	ENSMUSG00000019774.9	Mtrf1l	-0.148481	2.68088	3.20146	0.0866085	0.138769
	ENSMUSG00000101188.2	Eif4a-ps4	0.558512	6.41094	132.533	4.38941e-11	2.14417e-09
	ENSMUSG00000120454.1	ENSMUSG00000120454.1	0.557944	1.85815	19.9517	0.000171973	0.000677442
	ENSMUSG00000019779.16	Frk	0.0272132	2.7454	0.0743568	0.787503	0.837139
	ENSMUSG00000019782.11	Rwdd1	-0.0112218	4.78731	0.039725	0.843752	0.881459
	ENSMUSG00000019787.10	Trdn	-0.287902	1.97707	1.42262	0.245002	0.332231
	ENSMUSG00000019789.10	Hey2	0.0120045	2.13939	0.0136318	0.908057	0.931999
	ENSMUSG00000068614.8	Actc1	0.557841	7.68286	8.4256	0.00796644	0.0181485
	ENSMUSG00000095687.3	Rnaset2a	0.557501	5.02553	63.6616	4.15173e-08	5.88156e-07
	ENSMUSG00000019792.9	Trmt11	-0.152332	2.96332	3.05236	0.0938173	0.148344
	ENSMUSG00000020869.9	Lrrc59	0.557333	6.7446	137.02	3.14822e-11	1.60064e-09
	ENSMUSG00000096255.3	Dynlt1b	0.557308	5.54347	24.066	5.72952e-05	0.000264122
	ENSMUSG00000054046.8	Klk13	0.556767	2.49501	25.0811	4.43777e-05	0.00021197
	ENSMUSG00000019797.12	Mtres1	-0.07266	3.1202	0.858851	0.363581	0.457764
	ENSMUSG00000019802.14	Sec63	-0.00199548	7.12797	0.00208866	0.963938	0.974048
	ENSMUSG00000014551.9	Mrps25	0.55537	5.88604	108.315	3.17662e-10	1.04928e-08
	ENSMUSG00000019806.14	Aig1	0.0211076	5.08925	0.147235	0.704678	0.770124
	ENSMUSG00000021696.10	Elovl7	0.555363	3.06382	34.4966	5.2696e-06	3.44957e-05
	ENSMUSG00000019809.17	Pex3	-0.089699	4.5651	2.57742	0.121896	0.185105
	ENSMUSG00000019810.16	Fuca2	-0.0295023	5.97906	0.411804	0.527331	0.614099
	ENSMUSG00000019813.17	Cep57l1	0.109065	2.25377	1.05725	0.314421	0.406071
	ENSMUSG00000116617.2	Gm49767	0.554727	2.87333	24.6371	4.95888e-05	0.000232906
	ENSMUSG00000019817.19	Plagl1	-0.413328	5.17929	5.16588	0.0325852	0.0604268
	ENSMUSG00000051495.9	Irf2bp2	0.554602	6.88511	63.7827	4.08413e-08	5.80466e-07
	ENSMUSG00000001435.16	Col18a1	0.554493	6.34854	119.944	1.17739e-10	4.7202e-09
	ENSMUSG00000019822.13	Smpd2	0.0780924	5.21137	2.49005	0.128078	0.192946
	ENSMUSG00000019823.18	Mical1	-0.0959952	5.92232	4.30307	0.049294	0.0859638
	ENSMUSG00000024235.12	Map3k8	0.553794	4.17534	44.2777	8.20064e-07	7.08677e-06
	ENSMUSG00000078861.9	Zfp931	0.553708	2.15583	14.0191	0.00104459	0.00317418
	ENSMUSG00000020288.14	Ahsa2	0.55334	5.57303	114.495	1.85487e-10	6.79559e-09
	ENSMUSG00000019837.9	Gtf3c6	0.0262673	4.59072	0.177582	0.677329	0.745858
	ENSMUSG00000019838.12	Slc16a10	-0.0788014	4.29065	1.28632	0.268286	0.357393
	ENSMUSG00000049907.9	Rasl11b	0.553323	4.87781	63.0022	4.54181e-08	6.32625e-07
	ENSMUSG00000019842.7	Traf3ip2	-0.101502	4.59041	3.74275	0.0652951	0.109184
	ENSMUSG00000019843.15	Fyn	0.0561213	6.11328	1.59178	0.219583	0.302838
	ENSMUSG00000019845.9	Tube1	-0.421556	0.847889	4.64181	0.0417936	0.0746684
	ENSMUSG00000019846.12	Lama4	-0.111368	6.89286	3.66211	0.0680522	0.113284
	ENSMUSG00000019848.15	Popdc3	0.209566	3.5869	5.60534	0.0265945	0.0507531
	ENSMUSG00000028563.17	Tm2d1	0.552779	3.75376	25.9995	3.53911e-05	0.000174884
	ENSMUSG00000020790.15	Ankfy1	0.552706	6.65249	163.323	5.32249e-12	3.66873e-10
	ENSMUSG00000067924.5	Rtl8b	0.551663	6.73154	123.97	8.50881e-11	3.60158e-09
	ENSMUSG00000019852.8	Arfgef3	0.120561	3.83042	1.62229	0.215358	0.298065
	ENSMUSG00000019853.7	Hebp2	-0.287062	0.841354	3.90477	0.0601311	0.101818
	ENSMUSG00000019854.18	Reps1	0.0767065	5.36478	5.625	0.0263569	0.050421
	ENSMUSG00000033467.13	Crlf2	0.551158	4.27587	28.1253	2.13135e-05	0.00011294
	ENSMUSG00000024807.19	Syvn1	0.549065	6.3409	208.099	4.31203e-13	4.97996e-11
	ENSMUSG00000082394.2	Gm4596	0.548985	1.82077	10.0116	0.0042963	0.0106576
	ENSMUSG00000019863.8	Qrsl1	0.126448	3.29514	2.93022	0.100244	0.156799
	ENSMUSG00000019864.15	Rtn4ip1	0.0871632	3.49784	1.26026	0.273061	0.362219
	ENSMUSG00000031995.10	St14	0.548892	5.78467	88.511	2.15416e-09	5.1304e-08
	ENSMUSG00000085917.2	Gm15899	0.548863	1.21483	6.42485	0.0184306	0.0371617
	ENSMUSG00000003873.12	Bax	0.548735	5.2937	133.817	3.98715e-11	1.96418e-09
	ENSMUSG00000019873.9	Reep3	-0.150841	6.5209	5.31064	0.0304597	0.0570923
	ENSMUSG00000071291.11	Zfp58	0.548546	2.94408	19.0902	0.000219594	0.000833406
	ENSMUSG00000030144.5	Clec4d	0.548267	1.50643	8.49039	0.0077621	0.0177537
	ENSMUSG00000019878.9	Hsf2	0.0966394	3.85805	2.7934	0.10806	0.167121
	ENSMUSG00000019880.11	Rspo3	-0.152652	1.46486	0.928855	0.345078	0.438712
	ENSMUSG00000035828.12	Pim3	0.548237	6.40255	28.6832	1.87262e-05	0.000101135
	ENSMUSG00000035274.14	Tpbg	0.548192	1.46017	16.4108	0.000486993	0.00164938
	ENSMUSG00000030847.9	Bag3	0.54801	6.52877	117.57	1.43212e-10	5.58719e-09
	ENSMUSG00000057137.10	Tmem140	0.547954	6.94603	83.1663	3.83093e-09	8.25693e-08
	ENSMUSG00000019893.14	Ros1	0.169162	1.22986	0.415652	0.525425	0.612247
	ENSMUSG00000052821.4	Cysltr1	0.547502	2.63118	18.3189	0.000274586	0.00100959
	ENSMUSG00000062825.16	Actg1	0.547413	10.7075	132.062	4.54755e-11	2.20291e-09
	ENSMUSG00000019899.18	Lama2	-0.0393705	6.10875	0.232631	0.634089	0.710159
	ENSMUSG00000060935.7	Tmem263	0.547383	3.96776	39.7196	1.88001e-06	1.41867e-05
	ENSMUSG00000019907.11	Ppp1r12a	0.0474156	6.60839	0.836979	0.369653	0.463601
	ENSMUSG00000028840.11	Zfp593	0.547306	3.04557	45.5329	6.59201e-07	5.88021e-06
	ENSMUSG00000029223.13	Uchl1	0.546959	1.55972	7.81693	0.0102036	0.0223826
	ENSMUSG00000039361.12	Picalm	0.54663	7.78821	77.7753	7.0589e-09	1.36324e-07
	ENSMUSG00000019920.19	Lims1	0.0740379	7.35481	1.40879	0.247243	0.334601
	ENSMUSG00000003934.6	Efnb3	0.545222	0.885716	7.05023	0.0140665	0.0294449
	ENSMUSG00000019927.7	Ube2d1	0.068189	4.75228	3.06764	0.0930478	0.1473
	ENSMUSG00000019929.17	Dcn	0.155462	7.51765	1.92942	0.177983	0.254019
	ENSMUSG00000019942.14	Cdk1	-0.152158	2.4501	0.362768	0.552802	0.637686
	ENSMUSG00000023892.9	Zfp51	0.544052	3.54385	17.6328	0.000336262	0.00120067
	ENSMUSG00000019944.15	Rhobtb1	-0.080152	4.82024	1.79286	0.193522	0.272494
	ENSMUSG00000120996.1	ENSMUSG00000120996.1	0.543755	0.666464	10.3027	0.00385119	0.00970954
	ENSMUSG00000019947.11	Arid5b	0.0493671	6.79727	0.862996	0.362446	0.456632
	ENSMUSG00000019948.5	Actr6	-0.00500517	2.57804	0.00374231	0.951743	0.964519
	ENSMUSG00000018920.12	Cxcl16	0.543036	6.43532	99.416	7.22213e-10	2.09911e-08
	ENSMUSG00000019952.16	Poc1b	-0.0401441	4.41998	0.669157	0.42165	0.514458
	ENSMUSG00000036902.12	Neto2	0.542812	1.53972	6.73824	0.0160807	0.0330776
	ENSMUSG00000019961.18	Tmpo	-0.0275605	6.77876	0.452813	0.507636	0.595617
	ENSMUSG00000019966.19	Kitl	0.0898117	7.26355	0.640172	0.431748	0.523665
	ENSMUSG00000019969.15	Psen1	0.0352919	6.21126	1.05369	0.31522	0.406953
	ENSMUSG00000063253.12	Scoc	0.542168	4.9656	28.14	2.12403e-05	0.000112689
	ENSMUSG00000095028.7	Sirpb1b	0.542154	2.82302	17.4849	0.000351451	0.00124851
	ENSMUSG00000019975.13	Ikbip	-0.129561	4.70965	5.1571	0.0327194	0.0606497
	ENSMUSG00000019977.17	Hbs1l	-0.0178803	5.48235	0.284608	0.59876	0.679008
	ENSMUSG00000000628.11	Hk2	0.541732	4.79681	30.643	1.202e-05	6.90891e-05
	ENSMUSG00000019979.13	Apaf1	0.000339942	4.85989	3.03084e-05	0.995654	0.996798
	ENSMUSG00000057092.13	Fxyd3	0.541507	3.23066	16.5352	0.000468713	0.00159709
	ENSMUSG00000102145.2	Gm38056	0.541047	2.39782	23.3136	6.95029e-05	0.000310865
	ENSMUSG00000019986.18	Ahi1	-0.0166008	3.43046	0.0330387	0.857342	0.891597
	ENSMUSG00000019987.10	Arg1	-0.110796	1.32544	0.300971	0.588504	0.670034
	ENSMUSG00000019988.8	Nedd1	-0.0869226	4.14863	1.83845	0.188156	0.266119
	ENSMUSG00000019989.9	Enpp3	0.0174496	1.77591	0.0151469	0.903107	0.927957
	ENSMUSG00000043079.18	Synpo	0.540818	6.97827	121.669	1.02326e-10	4.19873e-09
	ENSMUSG00000019992.9	Mtfr2	0.27248	-0.116382	0.767396	0.389984	0.483536
	ENSMUSG00000044317.8	Gpr4	0.540436	4.09148	34.2467	5.54928e-06	3.61384e-05
	ENSMUSG00000019997.12	Ccn2	0.363373	7.80048	4.88689	0.0371667	0.0675648
	ENSMUSG00000020484.20	Xbp1	0.540191	7.8796	92.1724	1.47533e-09	3.73957e-08
	ENSMUSG00000020003.17	Pex7	-0.0123169	4.44972	0.06466	0.834946	0.874827
	ENSMUSG00000024145.7	Pigf	0.539972	2.12228	13.7321	0.00114899	0.00344035
	ENSMUSG00000020010.8	Vnn3	0.154169	3.20531	1.6751	0.208284	0.289849
	ENSMUSG00000042608.16	Stk40	0.539765	6.5319	225.064	1.88736e-13	2.47471e-11
	ENSMUSG00000113555.2	Gm10095	0.539395	4.63293	60.0142	6.88392e-08	8.95218e-07
	ENSMUSG00000020018.7	Snrpf	-0.0274877	3.95089	0.143116	0.708634	0.772958
	ENSMUSG00000030452.17	Nipa2	0.539379	4.78295	42.4872	1.12798e-06	9.26125e-06
	ENSMUSG00000024766.16	Lipo3	0.539197	4.45223	34.0619	5.76645e-06	3.73139e-05
	ENSMUSG00000060802.9	B2m	0.538785	10.3326	25.366	4.13491e-05	0.000199526
	ENSMUSG00000030411.17	Nova2	0.538721	5.35165	36.6853	3.38292e-06	2.35979e-05
	ENSMUSG00000014956.16	Ppp1cb	0.538461	7.30205	27.3271	2.5716e-05	0.000132524
	ENSMUSG00000063694.6	Cycs	0.538452	5.78992	50.7034	2.79434e-07	2.89374e-06
	ENSMUSG00000075700.11	Selenot	0.538331	7.04309	51.2146	2.57566e-07	2.71401e-06
	ENSMUSG00000024907.8	Gal	0.538252	0.562674	6.45751	0.0181687	0.0367356
	ENSMUSG00000091709.2	Gm17189	0.537969	-0.0110796	6.76424	0.0159012	0.0327624
	ENSMUSG00000020034.8	Tcp11l2	-0.042619	6.27978	0.569698	0.457956	0.548811
	ENSMUSG00000019818.16	Cd164	0.537652	7.97162	30.5328	1.23177e-05	7.06375e-05
	ENSMUSG00000020042.16	Btbd11	0.137756	2.04308	0.951347	0.339416	0.432536
	ENSMUSG00000020044.14	Timp3	-0.0692458	10.2562	2.10571	0.160109	0.232722
	ENSMUSG00000026473.17	Glul	0.537229	8.47631	43.4688	9.46069e-07	7.96259e-06
	ENSMUSG00000020052.10	Ascl1	0.171896	-0.128351	0.716841	0.405812	0.498483
	ENSMUSG00000038059.8	Smim3	0.537115	5.00392	72.3001	1.35972e-08	2.32472e-07
	ENSMUSG00000020056.17	Washc3	-0.0814243	4.10177	2.15406	0.155592	0.227269
	ENSMUSG00000020057.3	Dram1	0.0651032	8.44758	1.88126	0.183283	0.260283
	ENSMUSG00000020062.8	Slc5a8	-0.0662086	0.37976	0.0225158	0.882017	0.910848
	ENSMUSG00000020063.17	Sirt1	0.149549	4.69369	2.09029	0.161583	0.234527
	ENSMUSG00000020064.10	Herc4	0.0125278	5.3284	0.0374474	0.848238	0.88482
	ENSMUSG00000020067.9	Mypn	-0.184721	1.7528	0.613326	0.441442	0.532866
	ENSMUSG00000020069.17	Hnrnph3	0.0844143	5.77416	2.8633	0.103982	0.161757
	ENSMUSG00000045763.9	Basp1	0.536704	4.22443	23.8363	6.07538e-05	0.000277498
	ENSMUSG00000020072.16	Pbld2	-0.314901	1.88471	3.44862	0.0760175	0.124464
	ENSMUSG00000020074.8	Ccar1	-0.0881431	5.89	3.56458	0.0715664	0.118394
	ENSMUSG00000072244.12	Trim6	0.536159	2.01648	10.6445	0.00339191	0.00870901
	ENSMUSG00000020076.8	Ddx50	0.071672	6.23504	4.98717	0.0354416	0.0649427
	ENSMUSG00000024990.14	Rbp4	0.536118	4.38693	14.4317	0.000912206	0.00283261
	ENSMUSG00000020078.17	Vps26a	0.0710031	6.04287	3.26681	0.0836516	0.134899
	ENSMUSG00000020079.16	Supv3l1	0.103239	3.78143	4.15068	0.0531555	0.0916167
	ENSMUSG00000104876.2	Trdc	0.536097	1.64762	8.88278	0.00664143	0.0154922
	ENSMUSG00000000359.4	Rem1	0.53603	3.45938	23.8831	6.00318e-05	0.000274703
	ENSMUSG00000020085.16	Aifm2	0.0648191	4.80064	0.529292	0.474167	0.564668
	ENSMUSG00000020086.7	Macroh2a2	-0.133928	3.90082	4.88901	0.0371291	0.0675036
	ENSMUSG00000001467.6	Cyp51	0.535952	5.22763	51.1241	2.61295e-07	2.74006e-06
	ENSMUSG00000042854.10	Trp53rkb	0.53579	1.64546	18.6266	0.000251027	0.000935997
	ENSMUSG00000047261.10	Gap43	0.535658	4.08269	14.5768	0.000870112	0.00272031
	ENSMUSG00000029752.13	Asns	0.535408	4.21617	23.3242	6.93127e-05	0.000310093
	ENSMUSG00000020092.10	Pald1	0.099546	6.81813	1.49223	0.234111	0.320034
	ENSMUSG00000003882.6	Il7r	0.533959	4.21111	14.8618	0.000793429	0.00250754
	ENSMUSG00000020097.15	Sgpl1	0.00672268	6.43349	0.0384741	0.846198	0.883274
	ENSMUSG00000020098.8	Pcbd1	0.0706888	2.48141	0.369103	0.549382	0.634817
	ENSMUSG00000020099.9	Unc5b	0.0638502	5.10936	0.454734	0.506745	0.594689
	ENSMUSG00000020100.16	Slc29a3	-0.0954521	4.8639	1.83717	0.188305	0.266308
	ENSMUSG00000004936.9	Map2k1	0.533933	6.26808	165.847	4.54881e-12	3.25109e-10
	ENSMUSG00000020102.16	Slc16a7	-0.0705167	4.23053	0.430785	0.518047	0.605471
	ENSMUSG00000032744.5	Heyl	0.533055	6.12332	15.0683	0.000742504	0.00236589
	ENSMUSG00000020107.11	Anapc16	-0.107383	5.42652	5.57863	0.0269213	0.0513037
	ENSMUSG00000035478.15	Mbd3	0.532886	6.16578	124.383	8.23416e-11	3.50233e-09
	ENSMUSG00000020109.14	Dnajb12	0.074978	5.74548	3.2103	0.0862017	0.138257
	ENSMUSG00000020111.16	Micu1	0.00705529	6.31879	0.0343022	0.854672	0.889816
	ENSMUSG00000045534.5	Kcna5	0.532253	0.38092	5.8533	0.0237636	0.0461279
	ENSMUSG00000091183.6	Gm5141	0.532124	1.38974	5.76939	0.0246821	0.0477196
	ENSMUSG00000027792.12	Bche	0.531932	3.24304	8.50174	0.00772693	0.0176837
	ENSMUSG00000020120.16	Plek	0.185033	6.03462	3.60816	0.0699711	0.116068
	ENSMUSG00000027195.11	Hsd17b12	0.531862	5.89175	45.8816	6.20847e-07	5.59821e-06
	ENSMUSG00000020122.17	Egfr	0.0190958	4.92873	0.0663056	0.799059	0.845814
	ENSMUSG00000020123.7	Avpr1a	0.284859	1.20771	0.850244	0.365953	0.460013
	ENSMUSG00000020124.11	Usp15	0.0931317	5.78655	4.06818	0.0553881	0.0947995
	ENSMUSG00000020128.16	Vps54	-0.0455433	6.08523	0.597495	0.447323	0.538473
	ENSMUSG00000026676.8	Ccdc3	0.531594	1.95582	8.26502	0.00849887	0.0191637
	ENSMUSG00000030609.19	Aen	0.531272	5.14977	78.7869	6.27842e-09	1.24138e-07
	ENSMUSG00000101462.3	Gm3052	0.531124	0.377289	11.1342	0.00283535	0.00747365
	ENSMUSG00000025171.3	Ubtd1	0.530425	4.02677	123.535	8.80916e-11	3.70841e-09
	ENSMUSG00000049988.6	Lrrc25	0.530143	2.98211	20.2309	0.000159059	0.000634017
	ENSMUSG00000040857.16	Erf	0.529955	5.61821	71.3896	1.52194e-08	2.55694e-07
	ENSMUSG00000021265.4	Slc25a29	0.529097	3.13069	24.7778	4.78686e-05	0.000225677
	ENSMUSG00000020140.16	Lgr5	-0.305683	-0.399099	1.399	0.248845	0.336169
[truncated: 15,440 more rows]

## Sheet: c DEGs BA.5 vs PBS 2dpi
	Ensembl_ID	HUGO_ID	logFC	logCPM	F	PValue	FDR	M1 BA.5	M2 BA.5	M3 BA.5	M4 BA.5	M5 BA.5	M6 BA.5	M1_PBS	M2_PBS	M3_PBS	M4_PBS	M5_PBS	M6_PBS
BA.5 infected (mACE2-hACE2) versus PBS (C57BL/6J). Significant DEGs (EdgeR, FDR<0.0001) from lungs at 2 dpi.	ENSMUSG00000067736.3	Gm10222	14.1951	5.19774	69.5257	7.42864e-07	6.50341e-06	120.678	82.5396	64.4801	84.4349	58.0467	119.158	0	0	0	0	0	0
	ENSMUSG00000086216.2	Gm13610	11.4918	2.66383	107.547	4.41499e-09	9.2651e-08	11.4279	16.7959	16.0385	13.5407	14.1171	9.43334	0	0	0	0	0	0
	ENSMUSG00000085543.2	Gm13568	9.6451	0.160754	156.117	2.19798e-10	7.80662e-09	3.33041	3.08495	4.10743	4.59139	4.12114	3.40451	0	0	0	0	0	0
	ENSMUSG00000034855.14	Cxcl10	6.27493	5.82356	309.493	6.20848e-15	1.5922e-12	283.607	285.53	276.958	163.267	168.178	53.1246	1.8213	2.3211	2.41001	2.71564	3.73877	2.89966
	ENSMUSG00000060183.8	Cxcl11	5.94817	-0.944229	145.749	1.69269e-11	9.19589e-10	3.78753	3.63339	3.32506	2.64589	1.66599	0.638346	0.0543672	0	0.0708826	0.0234107	0.0268976	0.0541993
	ENSMUSG00000025165.13	Sectm1a	5.41087	0.0353952	225.564	1.84359e-13	2.43564e-11	7.24854	7.74666	4.56381	4.66921	4.38419	1.5604	0.108734	0.0977304	0.118138	0.140464	0.10759	0.108399
	ENSMUSG00000035373.3	Ccl7	4.89941	2.39621	188.807	1.19213e-12	1.09419e-10	30.039	29.8212	26.4701	15.8753	12.4511	5.67419	0.516488	0.366489	0.614316	0.67891	1.02211	0.84009
	ENSMUSG00000000386.19	Mx1	4.72773	5.76922	490.198	3.95947e-17	2.87705e-14	237.504	227.875	231.776	190.737	182.996	79.3677	7.04055	7.76957	7.65533	5.87609	8.49964	6.58522
	ENSMUSG00000020641.17	Rsad2	4.72736	6.23052	442.956	1.2188e-16	6.64207e-14	344.143	337.562	325.856	218.597	222.98	114.264	7.88324	9.74861	10.8923	8.17033	10.9473	11.409
	ENSMUSG00000035692.8	Isg15	4.69476	6.4077	718.491	5.46325e-19	1.5879e-15	352.958	334.957	365.757	249.024	278.133	179.872	9.92201	13.1936	13.5386	8.77901	10.6783	11.8426
	ENSMUSG00000034459.9	Ifit1	4.33043	7.17736	719.764	5.35521e-19	1.5879e-15	568.194	543.089	593.165	424.587	474.721	287.185	20.2518	23.9195	29.369	20.2737	26.8976	22.9534
	ENSMUSG00000041827.16	Oasl1	4.31076	4.7166	570.871	7.2365e-18	8.41315e-15	110.295	112.841	110.379	83.9679	84.3519	46.4574	4.13191	4.5689	4.44198	4.14369	5.35262	5.01344
	ENSMUSG00000025498.16	Irf7	4.22705	7.69087	667.767	1.24616e-18	2.42549e-15	775.986	775.077	848.607	580.383	653.42	370.383	32.7562	38.2859	41.7499	31.3235	36.1773	33.4681
	ENSMUSG00000025746.12	Il6	4.16164	0.282356	62.6929	4.73833e-08	6.53732e-07	5.81189	10.009	7.30209	2.64589	3.41967	0.922056	0.190285	0.195461	0.18902	0.117054	0.457259	0.541993
	ENSMUSG00000035385.6	Ccl2	4.13618	2.53143	128.848	5.80901e-11	2.64148e-09	30.6267	32.3577	26.0137	14.0854	15.257	5.24863	0.570855	0.904006	0.826964	0.936428	2.2594	1.57178
	ENSMUSG00000039364.14	Sectm1b	4.0937	0.983484	111.129	2.47871e-10	8.55964e-09	12.2115	12.614	7.43249	7.39291	7.97923	2.48246	0.244652	0.610815	0.236275	0.32775	0.591747	0.921389
	ENSMUSG00000028037.14	Ifi44	3.95868	5.8656	448.015	1.07479e-16	6.04622e-14	214.061	209.16	233.732	173.772	168.879	122.563	8.56283	11.6299	17.7207	11.4478	11.4315	11.2464
	ENSMUSG00000079362.6	Gm43302	3.93832	3.46846	87.4332	2.41383e-09	5.62013e-08	51.8499	34.3458	42.0522	25.8363	27.8835	23.2642	1.19608	2.05234	5.69424	0.983249	0.67244	2.68287
	ENSMUSG00000074896.4	Ifit3	3.87266	8.7624	563.564	8.35817e-18	9.10988e-15	1648.88	1625.63	1703.47	1200.22	1448.1	851.341	86.3623	91.8177	110.482	77.1617	107.752	105.201
	ENSMUSG00000062488.10	Ifit3b	3.84668	6.86491	553.534	1.02163e-17	1.01984e-14	470.372	457.876	459.054	329.88	356.961	213.775	22.1274	24.7991	32.9841	21.1633	27.9735	29.9993
	ENSMUSG00000023341.17	Mx2	3.83485	4.2233	596.982	4.38555e-18	6.95268e-15	72.8772	71.3653	75.5636	58.5208	64.0092	33.4777	4.43093	4.12911	5.36345	3.86277	4.86847	3.65845
	ENSMUSG00000066861.15	Oas1g	3.83334	3.63035	474.13	5.73411e-17	3.7036e-14	51.1969	47.4397	51.1146	35.1747	38.9316	23.6897	2.36497	2.78532	3.18972	2.57518	3.63118	2.81836
	ENSMUSG00000022548.15	Apod	3.8321	5.64481	323.617	3.82369e-15	1.02587e-12	175.532	181.601	201.459	136.886	147.66	74.7575	8.50846	8.13606	11.483	9.50474	15.5737	11.3277
	ENSMUSG00000032661.10	Oas3	3.70757	4.60324	279.767	1.84905e-14	3.83877e-12	97.9533	85.1447	90.3634	69.0265	72.6899	34.3998	5.87166	7.18319	7.2064	4.72896	5.19124	4.17335
	ENSMUSG00000078616.3	Trim30c	3.61641	-0.687096	93.6561	1.26991e-09	3.35038e-08	3.91813	2.19374	2.54269	2.17896	2.27978	0.851128	0.353387	0.122163	0.165393	0.210696	0.242078	0.0270997
	ENSMUSG00000057346.13	Apol9a	3.58433	3.50304	324.202	3.74937e-15	1.02164e-12	48.4542	39.3503	41.2699	35.4082	37.2657	18.512	3.01738	2.90748	3.9458	2.24743	3.3084	2.92676
	ENSMUSG00000022126.7	Acod1	3.57043	1.32302	47.74	4.5342e-07	4.32324e-06	17.9581	16.7273	10.7575	5.36959	3.68272	1.5604	0.489305	1.66142	0.874219	0.280928	0.484157	0.921389
	ENSMUSG00000000204.17	Slfn4	3.54588	4.79549	161.311	6.04197e-12	4.0216e-10	134.196	115.103	89.8418	62.5674	69.8841	33.0522	7.63859	9.28439	7.96248	4.77578	7.55823	6.04322
	ENSMUSG00000078922.10	Tgtp1	3.50313	6.68763	105.591	4.05982e-10	1.28726e-08	330.233	348.531	346.263	278.051	298.388	157.175	15.6849	13.4624	64.1488	16.1534	22.6747	22.7095
	ENSMUSG00000090877.4	Hspa1b	3.33617	6.47388	38.9037	2.19531e-06	1.62634e-05	162.602	193.941	443.602	127.002	156.253	76.6725	9.86764	16.8341	17.3426	18.4008	27.2742	25.3382
	ENSMUSG00000063388.6	BC023105	3.31701	1.41731	165.989	4.50911e-12	3.23598e-10	10.7749	11.6543	10.6272	8.24894	7.36545	4.53935	0.67959	0.586382	1.13412	0.795964	1.21039	0.921389
	ENSMUSG00000027514.15	Zbp1	3.22502	5.66375	232.672	1.32705e-13	1.85139e-11	193.948	172.62	177.011	136.341	143.1	70.4309	15.7665	13.0714	24.9743	11.916	16.4613	13.333
	ENSMUSG00000079339.8	Ifit1bl1	3.2187	4.44435	344.971	1.90554e-15	6.23454e-13	76.7954	79.7975	86.3212	56.5753	63.3078	29.2221	7.04055	7.89173	6.87562	6.83592	6.7513	6.72072
	ENSMUSG00000026536.10	Ifi211	3.17741	4.64352	244.623	7.79042e-14	1.14166e-11	96.7778	93.9197	96.1007	61.0888	65.4122	31.1371	7.88324	8.82017	9.61641	7.30414	9.0107	6.50392
	ENSMUSG00000030107.11	Usp18	3.16896	6.04461	671.646	1.16755e-18	2.42549e-15	217.522	215.193	243.121	169.881	185.188	114.051	21.2848	22.0138	22.9423	20.461	20.7112	19.8912
	ENSMUSG00000052776.11	Oas1a	3.16525	5.32626	539.364	1.3649e-17	1.19012e-14	133.543	123.878	139.261	104.201	118.461	75.5377	11.988	12.4606	16.8464	12.1033	13.0453	10.9483
	ENSMUSG00000054203.8	Ifi205	3.10581	4.26275	193.271	9.34644e-13	9.0842e-11	77.9055	73.559	73.7381	47.9372	44.4557	19.7178	6.36096	6.20588	7.70258	6.1336	7.28925	5.52833
	ENSMUSG00000068246.7	Apol9b	3.06277	4.32156	270.543	2.65191e-14	4.81735e-12	77.7749	63.4129	70.6086	55.7971	55.2409	35.0381	5.98039	5.6928	10.3725	5.66539	7.98859	7.12721
	ENSMUSG00000029561.18	Oasl2	3.06014	7.98175	667.501	1.25176e-18	2.42549e-15	805.503	786.115	850.824	629.954	745.05	487.98	85.6555	85.2698	101.15	75.8741	88.8966	79.3478
	ENSMUSG00000045932.13	Ifit2	3.04519	6.92456	427.171	1.82058e-16	8.81919e-14	447.647	432.236	443.993	295.483	310.664	186.113	42.4336	41.3155	43.073	43.1693	44.6769	41.7606
	ENSMUSG00000028341.10	Nr4a3	3.01802	3.66924	243.696	8.11194e-14	1.17887e-11	30.1696	22.0746	24.8402	23.9686	29.0234	26.2431	2.9902	2.05234	4.22933	2.66882	3.46979	3.87525
	ENSMUSG00000020638.9	Cmpk2	3.00174	6.33723	547.822	1.14718e-17	1.05293e-14	262.58	258.793	270.373	205.756	221.051	140.507	29.1408	27.5844	33.2203	26.9691	27.0859	25.6634
	ENSMUSG00000035352.4	Ccl12	2.96854	1.2708	126.836	6.78936e-11	2.98236e-09	8.22808	8.50076	9.5188	6.45907	5.08567	4.53935	1.332	0.488652	0.945102	0.585268	0.941416	1.13819
	ENSMUSG00000029417.10	Cxcl9	2.96534	2.96367	68.8149	2.10595e-08	3.3911e-07	19.8519	16.0418	15.9733	11.9843	12.9772	5.88697	2.39216	1.07503	1.13412	2.78587	1.90973	1.30078
	ENSMUSG00000053475.6	Tnfaip6	2.93361	0.737585	185.238	1.45359e-12	1.26746e-10	5.9425	5.75858	6.65012	3.57973	4.03346	2.69524	0.570855	0.513085	0.543434	0.585268	0.806928	0.731691
	ENSMUSG00000026166.15	Ccl20	2.84492	0.197073	53.7702	1.72829e-07	1.94198e-06	4.83236	5.82713	1.76033	2.25678	2.54283	1.41855	0.29902	0.390922	0.354413	0.561857	0.349669	0.623292
	ENSMUSG00000068606.7	Gm4841	2.8275	1.09263	119.19	1.25247e-10	4.96404e-09	6.26901	7.81522	7.95406	5.05831	5.52409	2.26968	0.598039	0.928439	1.15775	1.07689	0.699338	0.406495
	ENSMUSG00000073489.7	Ifi204	2.78626	4.69171	202.77	5.66063e-13	6.05618e-11	98.0186	84.9391	92.5149	62.3339	65.8506	31.7755	10.5472	10.8481	12.877	8.82583	9.81762	10.2437
	ENSMUSG00000033847.16	Pla2g4c	2.75924	-0.66209	94.4834	1.16904e-09	3.10775e-08	2.08967	2.12519	1.82552	1.86768	1.57831	0.922056	0.38057	0.244326	0.212648	0.351161	0.0806928	0.243897
	ENSMUSG00000058163.15	Gm5431	2.74626	3.45499	393.244	4.53404e-16	1.87778e-13	32.6511	34.0716	37.9448	29.2604	36.2134	19.0795	3.91444	4.71549	5.50522	4.54168	5.21813	4.25465
	ENSMUSG00000044703.6	Phf11a	2.69752	1.88866	198.367	7.12273e-13	7.43792e-11	13.7135	14.465	11.8007	9.72752	8.85607	5.9579	1.73975	1.56369	1.72481	1.28759	2.07112	1.57178
	ENSMUSG00000032690.17	Oas2	2.66488	5.62133	295.444	1.02673e-14	2.33845e-12	156.66	146.501	147.672	122.8	124.336	80.1479	17.5062	20.1813	26.5337	17.8155	23.2933	17.3438
	ENSMUSG00000068245.15	Phf11d	2.64277	6.3072	728.278	4.69008e-19	1.5879e-15	245.275	219.306	240.121	188.091	215.615	142.919	32.6475	34.5966	34.4726	31.8854	36.2849	30.4871
	ENSMUSG00000017830.16	Dhx58	2.61792	5.12214	603.957	3.8501e-18	6.7142e-15	105.267	100.844	116.833	84.4349	85.8425	64.1893	14.5432	15.6857	15.0507	13.9762	15.493	16.1243
	ENSMUSG00000069793.13	Slfn9	2.57653	3.6157	271.299	2.57362e-14	4.77461e-12	35.002	36.3339	39.1183	32.2954	36.2134	21.9166	5.24643	8.42925	4.82002	4.96307	5.40642	4.76954
	ENSMUSG00000105096.2	Gbp10	2.50802	2.94398	58.3077	8.78971e-08	1.09488e-06	30.8226	20.8406	22.1671	17.9765	19.6412	11.703	2.90864	2.22337	9.28563	1.7558	2.95874	2.43897
	ENSMUSG00000001131.12	Timp1	2.5066	3.39861	148.282	1.42228e-11	7.92432e-10	35.5244	37.3622	31.5555	22.8791	20.1673	12.8379	4.45811	4.95982	4.13482	3.97982	5.11054	5.66383
	ENSMUSG00000033355.7	Rtp4	2.50394	6.06023	571.161	7.19546e-18	8.41315e-15	190.029	183.52	189.268	151.827	173.439	131.287	28.6243	29.5146	36.7645	24.7217	31.3357	28.7527
	ENSMUSG00000079017.4	Ifi27l2a	2.49537	6.34689	184.773	1.49201e-12	1.28173e-10	249.781	183.178	257.008	159.92	197.815	153.558	33.7892	38.8234	24.3364	39.1661	47.5819	29.4573
	ENSMUSG00000086866.3	4930512H18Rik	2.45427	-0.557823	76.774	7.93626e-09	1.49946e-07	2.08967	1.43964	2.08631	2.95717	2.45515	0.922056	0.326203	0.219893	0.401668	0.515035	0.349669	0.325196
	ENSMUSG00000022586.12	Ly6i	2.43144	3.46735	47.1586	4.99806e-07	4.71396e-06	31.7369	38.2534	51.8318	20.3889	21.2195	10.4263	4.40374	6.91443	6.59209	3.83935	5.5678	4.98634
	ENSMUSG00000015947.11	Fcgr1	2.41674	3.61331	203.106	5.5631e-13	5.98857e-11	39.5078	35.9226	41.9218	25.4472	28.848	15.604	5.70855	6.23031	5.97777	5.26741	5.6485	6.28712
	ENSMUSG00000027832.6	Ptx3	2.41191	1.00423	61.6309	5.48669e-08	7.38272e-07	8.16277	9.73474	8.28005	3.57973	3.33199	1.5604	1.16889	1.34379	0.850592	0.983249	0.78003	1.40918
	ENSMUSG00000046718.9	Bst2	2.398	6.95967	332.104	2.88465e-15	8.27461e-13	354.264	340.099	376.514	256.573	289.971	198.668	53.2527	51.5284	66.417	47.1492	58.825	67.5053
	ENSMUSG00000001494.7	Sost	2.39636	-0.0225362	46.0157	6.06754e-07	5.51103e-06	3.0039	0.822654	1.82552	1.24512	1.92905	2.90802	0.598039	0.390922	0.378041	0.234107	0.322771	0.298096
	ENSMUSG00000003665.8	Has1	2.37554	0.733097	81.6354	4.54219e-09	9.48638e-08	3.72222	4.31893	6.91091	4.12447	2.80588	2.55339	0.788324	0.928439	0.732454	0.795964	0.645542	0.81299
	ENSMUSG00000110588.2	Gm45774	2.35005	0.753661	51.3478	2.52179e-07	2.6653e-06	6.46492	5.69003	4.88979	2.41242	4.12114	3.26266	0.516488	0.635248	0.897847	0.561857	1.69455	0.975588
	ENSMUSG00000057596.14	Trim30d	2.3356	5.34161	503.439	2.94336e-17	2.33315e-14	120.417	112.772	109.727	92.2169	100.661	65.6787	20.7139	20.7188	21.7373	19.5479	20.0387	16.3953
	ENSMUSG00000035208.17	Slfn8	2.33219	4.61092	194.858	8.58234e-13	8.50383e-11	78.3626	70.4055	75.368	58.832	63.3078	31.208	13.5918	13.9266	14.6018	10.605	11.6736	10.5689
	ENSMUSG00000091649.4	Phf11b	2.31005	3.89586	251.35	5.83268e-14	8.92247e-12	41.6628	42.9837	42.1826	34.0074	33.4952	19.7178	8.53565	7.9406	6.89924	6.39112	7.07407	6.36842
	ENSMUSG00000085105.3	Gm12758	2.26889	4.80491	187.957	1.24943e-12	1.13483e-10	33.8265	63.3444	63.3717	41.4003	46.9109	39.7193	7.50267	8.60028	9.97082	9.87932	12.9646	11.0025
	ENSMUSG00000024675.20	Ms4a4c	2.26187	3.87836	108.736	3.05997e-10	1.02228e-08	49.7603	49.4964	44.9861	30.5055	29.3741	15.0366	8.12789	8.28265	8.38778	7.67871	7.69271	5.58253
	ENSMUSG00000029798.12	Herc6	2.25377	5.50014	339.589	2.26236e-15	6.80229e-13	132.629	125.592	121.462	90.8939	106.536	69.6507	21.7197	22.7712	29.9597	19.4309	22.5671	19.1595
	ENSMUSG00000033576.13	Apol6	2.25324	3.02524	66.5306	2.83131e-08	4.29349e-07	31.9981	19.4695	16.8209	14.8636	14.7309	13.4053	3.56105	3.71376	1.96109	4.98648	5.89057	3.30616
	ENSMUSG00000033880.12	Lgals3bp	2.24389	8.66826	552.055	1.05265e-17	1.01984e-14	1029.03	1019.68	1170.36	828.473	970.485	692.393	184.033	195.925	206.694	190.376	212.975	215.605
	ENSMUSG00000039196.3	Orm1	2.24364	1.36653	31.4446	1.00751e-05	5.9559e-05	13.2563	7.541	4.04223	5.68087	3.41967	5.1777	0.761141	0.488652	0.803337	1.1003	2.85115	2.33057
	ENSMUSG00000086596.3	Susd5	2.24065	0.390316	111.503	2.39924e-10	8.38485e-09	2.22027	1.98808	2.21671	2.25678	2.98125	4.04286	0.489305	0.708545	0.448923	0.538446	0.591747	0.514894
	ENSMUSG00000040483.16	Xaf1	2.21387	6.13094	391.676	4.73778e-16	1.87778e-13	181.54	178.722	208.566	143.111	176.42	119.513	33.9795	33.0329	43.0966	33.1964	38.2753	35.6903
	ENSMUSG00000047230.7	Cldn2	2.19222	0.940147	88.0509	2.2611e-09	5.32857e-08	8.42398	7.19822	3.39026	4.43575	3.15662	3.68822	1.19608	1.07503	0.945102	0.842785	1.1028	1.49048
	ENSMUSG00000037849.9	Ifi206	2.14358	4.45266	357.374	1.29514e-15	4.60938e-13	69.2856	52.2385	54.1789	48.2485	55.1532	34.6126	11.3899	11.6299	13.3023	11.003	12.5343	11.138
	ENSMUSG00000092021.10	Gbp11	2.14227	1.03712	106.333	3.79538e-10	1.21893e-08	8.03217	5.62147	5.93295	5.52523	4.38419	2.26968	1.08734	0.904006	1.6303	1.24077	1.18349	1.13819
	ENSMUSG00000073437.12	D330041H03Rik	2.12992	5.13904	253.606	5.30158e-14	8.30735e-12	46.038	62.4532	57.6344	54.7076	59.0113	54.1885	16.9354	11.7521	10.2307	12.3843	12.2115	12.8452
	ENSMUSG00000028268.15	Gbp3	2.12769	6.53674	167.417	4.12978e-12	3.01336e-10	271.004	230.96	262.549	188.87	206.671	138.592	43.9287	38.5058	79.0578	41.6008	46.6135	47.4515
	ENSMUSG00000030921.18	Trim30a	2.12422	6.39967	339.655	2.2576e-15	6.80229e-13	249.128	213.136	213.456	181.477	183.785	125.541	40.422	45.298	52.6894	42.2797	43.3858	43.5221
	ENSMUSG00000054072.13	Iigp1	2.12322	7.22242	77.9633	6.90625e-09	1.34268e-07	433.607	391.926	389.488	322.175	323.027	206.257	64.5882	42.7082	158.399	57.0753	81.2576	70.2423
	ENSMUSG00000024679.11	Ms4a6d	2.11856	3.36952	162.892	5.4684e-12	3.72513e-10	28.9942	26.8048	33.5766	21.2449	22.9732	11.703	5.19207	5.59507	5.12718	5.50151	5.89057	6.20582
	ENSMUSG00000049734.10	Trex1	2.10314	4.6838	303.257	7.74095e-15	1.87492e-12	70.3958	70.3369	72.3037	56.1083	56.7315	36.6695	15.3587	15.4903	13.9403	12.2672	13.5564	13.8479
	ENSMUSG00000104713.5	Gbp6	2.09513	6.92296	89.1183	2.02133e-09	4.86206e-08	362.754	287.929	295.67	249.336	240.955	165.97	55.5361	45.0293	119.603	45.2529	53.9028	55.7169
	ENSMUSG00000010601.15	Apol7a	2.09415	0.31377	75.9333	8.76467e-09	1.63124e-07	2.8733	2.87929	3.58585	4.20229	4.03346	1.5604	0.761141	1.02617	0.401668	0.772553	0.645542	0.84009
	ENSMUSG00000026582.8	Sele	2.08165	1.45164	38.0553	2.58514e-06	1.86754e-05	11.6891	8.2951	3.12947	5.99215	7.27776	2.19875	2.20187	1.0506	1.60667	1.07689	1.42557	1.76148
	ENSMUSG00000046879.8	Irgm1	2.07044	6.96036	163.523	5.25624e-12	3.65194e-10	332.911	311.649	322.27	257.663	284.096	176.325	65.5125	56.1217	103.512	56.0686	61.1113	58.7792
	ENSMUSG00000029605.18	Oas1b	2.07039	4.20562	298.2	9.2863e-15	2.15925e-12	50.2174	48.9479	52.6142	43.8127	42.176	26.3141	11.7161	9.72418	11.2703	9.66862	10.7321	9.81008
	ENSMUSG00000073555.2	Gm4951	2.06719	4.26513	76.8586	7.85773e-09	1.48947e-07	63.9308	52.1014	51.0494	44.2797	37.441	25.0374	8.34536	6.88999	21.7373	8.63855	10.4363	9.26808
	ENSMUSG00000027078.15	Ube2l6	2.05736	6.1673	245.452	7.5144e-14	1.12969e-11	180.626	171.181	196.7	130.427	150.027	107.668	34.3872	39.1899	37.5442	37.0123	35.3972	41.598
	ENSMUSG00000070327.15	Rnf213	2.03337	8.08912	477.298	5.32544e-17	3.57194e-14	685.085	637.351	715.083	591.511	656.226	453.226	152.609	147.28	178.034	137.678	151.38	146.257
	ENSMUSG00000090231.11	Cfb	2.02377	6.7215	115.137	1.75657e-10	6.53153e-09	283.15	276.48	308.383	207.78	185.276	98.0926	48.4683	70.5125	46.0973	58.2926	49.6799	61.3536
	ENSMUSG00000018930.4	Ccl4	2.01559	0.73225	75.1175	9.65896e-09	1.75278e-07	5.55069	5.62147	5.80255	4.43575	2.27978	1.91504	1.00579	0.952872	1.25226	0.819375	1.04901	1.27368
	ENSMUSG00000040428.20	Plekha4	2.00212	3.90582	271.786	2.52446e-14	4.73377e-12	37.3529	41.2698	42.8998	31.6728	31.9169	20.4271	7.82887	8.52698	7.96248	9.08335	9.17208	8.78029
	ENSMUSG00000085977.2	Gm5970	1.97203	0.427301	49.2681	3.52367e-07	3.50112e-06	3.85283	3.42773	4.36822	2.95717	3.59504	1.41855	0.625223	0.537517	0.945102	0.702321	1.23729	0.948488
	ENSMUSG00000078763.3	Slfn1	1.97042	4.14385	155.494	8.78611e-12	5.48749e-10	55.7028	41.8183	41.3351	36.1086	40.6853	20.498	11.3627	11.5811	10.6088	8.9663	9.79073	7.9673
	ENSMUSG00000073490.12	Ifi207	1.95995	4.6945	252.024	5.66811e-14	8.74745e-12	74.118	58.8198	66.0448	55.5636	52.8734	35.0381	13.7821	14.4641	16.4211	14.3039	15.4392	13.6582
	ENSMUSG00000086714.3	0610009E02Rik	1.95932	4.34386	155.585	8.73386e-12	5.48749e-10	31.9981	37.2937	34.0982	33.307	37.7918	30.5697	12.4501	10.7503	7.44268	8.21716	5.00295	8.83449
	ENSMUSG00000037921.16	Ddx60	1.93415	3.99134	270.55	2.65114e-14	4.81735e-12	41.0751	37.705	39.0532	40.8556	40.1592	27.9454	9.59581	11.068	10.6797	9.71544	10.1942	8.0215
	ENSMUSG00000049892.8	Rasd1	1.9325	2.69245	46.555	5.5348e-07	5.1205e-06	18.0234	14.3279	15.7777	11.2839	13.0649	10.6391	4.24064	3.15181	1.98471	4.07346	5.02985	3.36036
	ENSMUSG00000026104.15	Stat1	1.91642	8.1436	179.946	1.96291e-12	1.63006e-10	725.703	613.426	691.417	550.733	620.89	431.168	143.801	133.036	247.428	140.136	154.5	143.547
	ENSMUSG00000041347.6	Bdkrb1	1.91217	1.64092	80.0743	5.41783e-09	1.09486e-07	7.37915	8.77498	8.99722	6.92599	6.48861	4.96492	1.44073	1.36823	1.58305	2.06014	2.2863	2.84546
	ENSMUSG00000053113.4	Socs3	1.90997	6.33376	177.967	2.20072e-12	1.79338e-10	169.72	239.461	209.088	142.8	152.921	104.831	40.9929	37.6751	46.121	46.3298	46.8556	53.305
	ENSMUSG00000020893.18	Per1	1.87981	6.97685	168.142	3.95061e-12	2.90695e-10	179.255	183.246	229.038	245.834	217.281	213.917	55.4002	44.5895	58.7617	47.4301	73.9684	64.5785
	ENSMUSG00000031431.14	Tsc22d3	1.87791	7.83921	116.682	1.5422e-10	5.89791e-09	306.398	258.313	466.226	405.91	440.787	394.356	103.733	95.7025	97.0147	112.137	112.782	96.6645
	ENSMUSG00000035852.12	Misp	1.86449	3.77097	312.232	5.64263e-15	1.46868e-12	30.3655	36.9509	35.3369	26.9258	29.9879	20.0724	8.12789	8.18492	8.12788	8.56832	7.8272	8.50929
	ENSMUSG00000021614.17	Vcan	1.8588	3.52166	208.454	4.23541e-13	4.92409e-11	30.2349	24.3369	26.2093	25.7585	22.3594	14.4692	6.44251	7.69627	6.02502	7.42119	6.53612	5.39283
	ENSMUSG00000046031.8	Calhm6	1.85142	1.37546	68.7739	2.11703e-08	3.39952e-07	7.96687	6.7869	7.1717	5.83651	5.69945	2.48246	2.1475	1.34379	2.10285	1.21736	1.82904	1.32788
	ENSMUSG00000038037.6	Socs1	1.83586	2.84758	98.9484	7.5531e-10	2.17357e-08	18.2193	19.2638	18.9724	14.9415	9.99596	7.58923	5.08333	4.32457	4.11119	4.26075	2.93184	4.28175
	ENSMUSG00000070427.5	Il18bp	1.83571	4.08104	159.236	6.89583e-12	4.50398e-10	42.3811	41.4069	45.8989	30.6611	31.4785	20.5689	8.37255	9.30882	11.6011	10.5114	10.248	9.51198
	ENSMUSG00000001123.16	Lgals9	1.83274	7.57258	579.108	6.16449e-18	8.26943e-15	415.453	413.247	465.182	343.265	408.256	302.151	113.057	111.339	108.403	103.756	109.635	112.897
	ENSMUSG00000033213.17	AA467197	1.81949	1.09994	54.1645	1.62708e-07	1.8473e-06	5.35478	6.99256	5.80255	4.90267	4.73493	2.26968	1.76693	1.41709	0.897847	0.819375	1.77524	1.86988
	ENSMUSG00000022584.15	Ly6c2	1.8126	5.18034	114.668	1.82772e-10	6.75289e-09	106.181	84.5963	73.9337	64.2794	69.8841	34.5416	22.1818	17.2983	20.2016	18.8222	24.3692	20.7041
	ENSMUSG00000027317.9	Ppp1r14d	1.80822	0.774558	81.604	4.55822e-09	9.49399e-08	4.37525	4.66171	3.52065	2.95717	4.03346	4.04286	0.978609	1.0506	1.03961	0.936428	1.04901	1.68018
	ENSMUSG00000091549.2	Gm6548	1.78958	4.7693	808.458	1.44123e-19	1.25668e-15	61.3841	59.9167	58.7427	51.1278	61.9048	46.3156	15.848	17.396	16.4684	17.6751	15.7082	15.0132
	ENSMUSG00000114759.2	Gm10257	1.78943	-0.045452	42.4491	1.13578e-06	9.31227e-06	1.89376	0.959763	1.30394	1.71204	2.36747	1.41855	0.217469	0.317624	0.637944	0.515035	0.376566	0.677492
	ENSMUSG00000001349.6	Cnn1	1.78806	5.55026	111.968	2.30435e-10	8.09389e-09	61.58	53.0612	59.7859	102.022	101.45	71.282	24.1662	22.9422	15.7123	27.4842	17.6448	21.7068
	ENSMUSG00000006930.16	Hap1	1.78541	5.13937	330.5	3.04086e-15	8.55315e-13	76.6648	81.5799	90.2982	66.225	69.7087	52.4863	21.91	23.3576	18.4295	23.5278	18.2635	21.3274
	ENSMUSG00000120878.1	ENSMUSG00000120878.1	1.77765	1.36193	64.1943	3.86316e-08	5.54939e-07	8.09747	4.59315	5.99815	5.21395	2.98125	3.04988	1.22326	1.2705	1.91383	1.45146	1.47937	1.40918
	ENSMUSG00000030156.6	Cd69	1.77348	2.53566	69.9257	1.82855e-08	3.01615e-07	14.7583	11.5172	12.5179	12.3734	11.4866	5.24863	3.61542	4.03138	2.03197	4.49485	3.46979	2.19507
	ENSMUSG00000025492.7	Ifitm3	1.7653	9.01222	420.102	2.18907e-16	9.93793e-14	1128.68	1094.4	1271.54	935.476	1064.13	801.834	308.044	292.067	321.216	290.129	322.637	318.069
	ENSMUSG00000059430.15	Actg2	1.76479	4.67023	153.143	1.02574e-11	6.15814e-10	32.847	32.7005	34.4241	52.8399	53.7502	39.6484	16.6635	10.8481	9.07298	13.7187	10.7321	11.2193
	ENSMUSG00000046828.4	Mettl21e	1.76268	0.479792	49.6838	3.29319e-07	3.30627e-06	1.50195	1.37109	2.93388	3.03499	1.75368	4.25564	0.788324	0.732978	0.708826	0.725732	0.645542	0.758791
	ENSMUSG00000073491.12	Ifi213	1.75718	5.29707	201.928	5.91277e-13	6.24926e-11	103.83	91.3146	88.0163	81.789	79.0032	49.4364	23.4866	22.8201	30.1487	22.6616	23.3202	23.5496
	ENSMUSG00000050896.13	Rtn4rl2	1.75651	0.970863	61.4963	5.59039e-08	7.48203e-07	3.39571	5.34725	6.32413	3.81319	2.36747	3.47544	1.19608	1.1239	1.58305	0.819375	1.50627	1.11109
	ENSMUSG00000023036.15	Pcdhgc4	1.74422	6.43421	146.711	1.58391e-11	8.77831e-10	111.536	161.583	170.752	110.349	141.259	119.725	35.0125	50.0135	27.9041	38.7447	42.6327	49.1317
	ENSMUSG00000078920.4	Ifi47	1.74335	6.70784	105.672	4.03006e-10	1.28015e-08	256.115	241.655	246.315	203.188	208.074	126.251	63.7727	45.9577	104.552	51.3163	60.6003	56.5841
	ENSMUSG00000048852.14	Gm12185	1.73905	3.67842	73.2954	1.2036e-08	2.09896e-07	35.5897	27.4218	28.8172	26.4589	26.2175	16.4552	7.93761	5.27744	14.9326	6.57841	6.91268	6.53102
	ENSMUSG00000071637.6	Cebpd	1.73543	6.21216	120.973	1.08263e-10	4.40091e-09	125.25	120.862	163.58	108.17	132.403	113.555	32.2669	32.2022	38.3948	34.0157	47.9853	44.6602
	ENSMUSG00000040033.17	Stat2	1.72502	7.29079	276.234	2.12015e-14	4.24981e-12	377.904	333.449	376.449	318.907	339.95	236.33	96.2299	87.542	132.952	91.4656	96.8045	94.8217
	ENSMUSG00000035148.5	Gpr33	1.71349	-0.444668	54.4714	1.55275e-07	1.77447e-06	1.89376	1.57675	2.15151	1.40076	0.964523	0.780201	0.543672	0.415354	0.519806	0.468214	0.403464	0.325196
	ENSMUSG00000039236.19	Isg20	1.71114	5.78561	319.486	4.39693e-15	1.16179e-12	135.502	118.394	123.353	95.0184	93.7341	80.8572	30.6903	32.08	33.811	31.6279	34.3482	35.2025
	ENSMUSG00000022906.16	Parp9	1.69782	6.40477	416.178	2.42792e-16	1.05851e-13	196.168	184.069	189.333	161.632	179.226	123.485	52.4643	51.0397	62.1641	50.731	51.3475	50.9474
	ENSMUSG00000029321.2	Slc10a6	1.69617	4.81031	426.052	1.87412e-16	8.8332e-14	43.4913	47.2341	55.5481	44.0462	48.0508	40.7123	13.7549	15.5391	15.3815	12.6652	14.5247	14.2544
	ENSMUSG00000078853.9	Igtp	1.69401	6.98582	36.7141	3.36364e-06	2.34728e-05	342.836	276.138	301.211	251.748	240.078	131.925	63.365	43.9298	176.64	49.8882	72.5428	70.7572
	ENSMUSG00000075010.7	AW112010	1.67921	6.07276	219.052	2.51257e-13	3.10757e-11	148.562	141.908	133.72	118.987	116.006	79.7933	36.2901	34.4744	43.6873	36.1929	40.8844	39.3216
	ENSMUSG00000055546.7	Timd4	1.67327	1.38757	60.5381	6.39286e-08	8.38864e-07	6.13841	3.90761	5.80255	5.99215	4.03346	4.96492	2.09314	1.66142	1.22863	1.56852	1.96352	1.16529
	ENSMUSG00000026896.15	Ifih1	1.67249	6.22561	385.591	5.6279e-16	2.181e-13	169.916	159.115	179.292	140.621	152.132	119.3	45.5869	48.0589	55.7846	45.5338	50.0295	43.766
	ENSMUSG00000050359.8	Sprr1a	1.67233	0.463711	29.5548	1.53424e-05	8.52902e-05	2.35088	2.87929	4.04223	2.49024	2.10441	2.26968	1.11453	0.65968	0.874219	0.491625	0.457259	1.49048
	ENSMUSG00000040328.17	Or2v1	1.6707	2.81685	54.0844	1.6471e-07	1.86397e-06	20.7008	20.0865	17.0817	13.2294	14.9063	8.44036	4.56684	2.78532	8.97847	3.83935	5.02985	4.47144
	ENSMUSG00000118607.2	Gm7592	1.67043	1.18927	32.311	8.3505e-06	5.07933e-05	11.5585	4.86737	4.43341	3.19063	4.64725	2.05689	2.01159	1.1972	2.17373	1.49828	1.77524	1.02979
	ENSMUSG00000002307.17	Daxx	1.65348	5.89754	344.462	1.93651e-15	6.23454e-13	133.347	130.528	141.608	107.081	113.112	78.091	37.8667	37.1131	38.9855	36.2398	34.671	38.9422
	ENSMUSG00000028766.11	Alpl	1.63743	2.91118	177.357	2.28028e-12	1.82412e-10	16.2602	15.2877	17.2121	12.4512	12.9772	11.7739	4.94741	6.05929	4.30021	4.79919	3.65807	3.87525
	ENSMUSG00000030895.10	Hpx	1.63472	1.11014	48.48	4.01031e-07	3.91797e-06	6.85673	6.85545	4.36822	5.05831	3.50736	2.3406	1.38636	1.17276	1.32314	1.40464	1.50627	2.57447
	ENSMUSG00000032515.9	Csrnp1	1.62537	5.35661	129.324	5.60047e-11	2.57017e-09	78.6891	68.1432	83.4525	70.0381	80.4938	54.4722	22.8342	18.862	20.6268	22.7552	25.472	30.6226
	ENSMUSG00000056749.8	Nfil3	1.61952	3.65173	190.019	1.11535e-12	1.04013e-10	22.9211	22.4859	22.6886	16.8092	18.2382	14.1145	7.31239	6.79226	6.2613	5.87609	6.34783	5.63673
	ENSMUSG00000029378.6	Areg	1.59949	2.09219	66.0083	3.0328e-08	4.53205e-07	10.3177	10.3517	11.2139	6.53689	8.85607	5.53234	2.44652	2.66315	2.78805	2.85611	2.90494	3.79395
	ENSMUSG00000107379.2	Gm43126	1.5898	2.31835	77.5101	7.28054e-09	1.39369e-07	10.5137	8.63787	8.34525	9.02714	6.31324	7.58923	2.93583	2.78532	2.33913	2.78587	2.15181	3.79395
	ENSMUSG00000078921.4	Tgtp2	1.58688	7.38015	39.1955	2.07639e-06	1.55009e-05	418.456	349.422	351.283	305.989	305.315	184.34	88.5098	60.2997	225.69	78.5897	98.1224	86.1227
	ENSMUSG00000024079.5	Eif2ak2	1.58098	5.64223	380.991	6.42114e-16	2.43431e-13	116.826	109.893	112.596	99.7654	108.027	75.4667	32.3757	37.162	35.3232	34.3903	35.3972	33.441
	ENSMUSG00000040152.9	Thbs1	1.57224	8.04624	81.7452	4.48668e-09	9.39826e-08	608.094	438.338	450.839	412.291	396.244	326.55	161.824	125.022	112.396	165.139	139.087	181.974
	ENSMUSG00000105504.5	Gbp5	1.56936	5.58181	41.0635	1.46286e-06	1.15225e-05	129.886	109.139	111.357	90.1157	82.6859	42.982	24.6555	20.1325	63.2746	23.3873	30.3674	28.9966
	ENSMUSG00000043939.17	A530064D06Rik	1.56769	1.20878	51.9606	2.28921e-07	2.45822e-06	6.33431	6.64979	5.86775	3.26845	5.61177	3.19173	1.8213	1.85688	1.91383	0.866196	2.39389	1.59888
	ENSMUSG00000034422.15	Parp14	1.5676	7.47512	262.211	3.70947e-14	6.16091e-12	414.538	370.537	379.839	338.206	359.416	239.522	114.552	111.413	146.136	111.06	113.589	112.409
	ENSMUSG00000021750.17	Fam107a	1.55042	4.30106	107.43	3.43832e-10	1.11867e-08	26.3168	27.4218	41.4003	33.2292	27.0066	30.9953	9.62299	7.91616	12.1682	9.90273	11.4315	12.6555
	ENSMUSG00000025610.8	Map3k7cl	1.54871	0.894349	62.0937	5.14588e-08	6.97529e-07	2.28558	3.35917	3.06427	2.41242	3.68272	2.62431	1.16889	1.02617	1.34677	0.67891	0.699338	1.00269
	ENSMUSG00000023067.15	Cdkn1a	1.54841	6.68991	259.14	4.20846e-14	6.85901e-12	153.199	151.3	212.478	154.473	151.079	145.614	46.4839	54.3625	60.9827	50.2394	51.3475	67.6679
	ENSMUSG00000020089.9	Ppa1	1.54722	4.24009	206.244	4.73701e-13	5.27089e-11	42.1199	38.7333	39.0532	30.272	32.6184	25.392	12.1511	11.6788	12.4045	10.4646	13.6102	11.0296
	ENSMUSG00000043263.14	Ifi209	1.54665	5.42789	117.012	1.50029e-10	5.77562e-09	113.495	92.2744	91.4717	84.0458	80.1431	42.982	29.3039	33.8147	28.4712	31.862	25.6603	23.5767
	ENSMUSG00000026475.8	Rgs16	1.53598	0.950572	45.5256	6.60032e-07	5.88461e-06	6.13841	4.31893	5.15058	3.65755	3.33199	1.84411	1.30481	1.58812	0.779709	2.01332	1.18349	1.57178
	ENSMUSG00000120992.1	ENSMUSG00000120992.1	1.5358	6.9646	116.689	1.54132e-10	5.89791e-09	248.344	228.629	285.564	223.655	254.02	177.248	87.9389	111.071	55.7138	75.8039	69.6379	88.7514
	ENSMUSG00000019082.19	Slc25a22	1.52472	5.64764	419.525	2.22249e-16	9.93793e-14	102.851	95.4964	105.554	87.7033	94.3479	68.5868	32.2397	31.176	32.2043	31.8386	33.9717	31.3543
	ENSMUSG00000026285.9	Pdcd1	1.51687	0.192033	32.2445	8.47078e-06	5.14173e-05	1.56725	1.37109	1.69513	1.71204	1.13989	1.06391	0.761141	0.513085	0.212648	0.585268	0.403464	0.514894
	ENSMUSG00000048636.8	A730049H05Rik	1.51125	0.137956	39.6873	1.89153e-06	1.42675e-05	1.63255	2.33085	0.977959	1.9455	2.63052	2.19875	0.869875	0.732978	0.496178	0.468214	0.618645	0.894289
	ENSMUSG00000040296.16	Rigi	1.50263	6.90648	392.064	4.68655e-16	1.87778e-13	263.56	237.404	258.703	222.099	234.204	172.354	80.8984	88.9347	84.0432	77.981	79.8321	78.2909
	ENSMUSG00000006403.14	Adamts4	1.48963	1.36925	32.5675	7.90369e-06	4.84473e-05	7.31385	7.06112	5.08539	3.19063	3.41967	2.97895	1.71257	1.58812	1.48854	1.61534	1.56006	2.43897
	ENSMUSG00000002325.16	Irf9	1.47248	6.79257	490.873	3.8993e-17	2.87705e-14	220.068	218.209	214.955	192.371	211.581	171.857	76.7937	67.9715	85.6735	66.7439	77.4113	68.3182
	ENSMUSG00000056144.15	Trim34a	1.4658	6.09116	451.223	9.93131e-17	5.77307e-14	143.273	134.435	136.849	125.213	133.543	98.8018	48.1965	46.8129	49.2162	45.1124	45.7797	44.4163
	ENSMUSG00000022596.4	Slurp1	1.46155	1.26327	46.0094	6.07408e-07	5.51198e-06	2.41618	2.81074	6.51972	3.89101	3.33199	3.19173	1.16889	1.41709	1.22863	1.26418	1.39868	1.57178
	ENSMUSG00000060969.10	Irx1	1.46031	6.39288	285.005	1.51404e-14	3.21991e-12	108.859	106.465	150.28	126.536	114.778	147.6	50.5071	46.8862	45.7429	47.3833	40.6423	43.0614
	ENSMUSG00000038507.7	Parp12	1.43102	6.87571	345.697	1.86229e-15	6.23454e-13	243.708	240.695	261.637	203.111	217.105	159.658	81.0343	79.8213	88.3907	81.399	81.9301	79.2394
	ENSMUSG00000036412.6	Arsi	1.42903	1.5018	57.9928	9.20039e-08	1.13389e-06	7.57505	6.44412	4.88979	3.96883	4.03346	3.26266	1.57665	1.75915	1.70118	1.98991	1.82904	2.38477
	ENSMUSG00000062007.14	Hsh2d	1.42478	2.28395	125.958	7.2722e-11	3.16259e-09	11.2973	11.997	9.64919	9.2606	10.259	7.44737	4.86586	3.73819	2.78805	4.05005	4.06154	2.81836
	ENSMUSG00000070501.15	Ifi214	1.41009	1.42465	59.914	6.98244e-08	9.06003e-07	6.79143	6.10135	4.95499	4.90267	5.61177	2.62431	1.63102	1.73471	1.74844	2.50495	2.2594	1.76148
	ENSMUSG00000020363.7	Gfpt2	1.40944	4.30905	202.068	5.86999e-13	6.24188e-11	34.9367	29.547	33.6418	30.9724	32.7061	25.9594	11.2268	10.7503	12.9243	12.2672	11.808	11.68
	ENSMUSG00000010358.14	Ifi35	1.40628	6.25723	300.662	8.49585e-15	2.02958e-12	161.231	144.376	160.32	126.536	138.102	101.001	55.3458	49.7692	57.4622	49.6541	49.6799	51.923
	ENSMUSG00000026981.16	Il1rn	1.40293	3.90172	38.8302	2.2264e-06	1.6417e-05	39.0507	43.1893	36.9668	22.9569	19.9042	12.696	9.24242	15.8812	10.5143	11.3074	6.37473	12.9536
	ENSMUSG00000023905.16	Tnfrsf12a	1.40023	4.80096	177.721	2.23241e-12	1.81074e-10	49.5644	43.7378	49.0283	40.8556	39.2824	38.8682	20.0615	17.054	14.5309	18.1901	13.7447	15.5281
	ENSMUSG00000007682.9	Dio2	1.39647	1.14908	39.3254	2.02574e-06	1.51748e-05	6.92203	3.22206	2.60789	2.95717	2.89357	2.62431	1.14171	1.31936	0.968729	1.45146	1.66765	1.54468
	ENSMUSG00000094796.3	BC147527	1.39136	1.89987	76.7768	7.93365e-09	1.49946e-07	10.1218	7.74666	7.62808	7.00381	6.92703	4.25564	3.07175	2.73645	2.83531	2.83269	2.2863	2.89966
	ENSMUSG00000091144.3	Phf11c	1.3887	2.16103	102.47	5.41222e-10	1.62731e-08	9.46882	9.73474	9.64919	7.08163	8.24229	5.46141	2.82709	3.05408	3.99306	3.13703	3.12012	2.81836
	ENSMUSG00000001095.6	Slc13a2	1.38864	0.14912	36.5876	3.44926e-06	2.40031e-05	3.0039	2.19374	1.36914	2.41242	1.75368	1.06391	0.924242	0.684113	0.567061	0.866196	0.726235	0.731691
	ENSMUSG00000028270.13	Gbp2	1.38451	7.32318	63.688	4.13688e-08	5.86529e-07	376.01	309.729	340.721	259.841	256.125	157.317	104.439	84.8789	167.708	94.0876	102.13	97.9111
	ENSMUSG00000106734.5	Gm20559	1.38451	6.11812	231.369	1.40845e-13	1.94937e-11	152.677	138.549	143.304	118.52	121.267	89.0139	47.4354	53.1409	50.4448	50.7778	47.2322	43.4137
	ENSMUSG00000035783.10	Acta2	1.37986	7.94335	193.863	9.05278e-13	8.86918e-11	327.229	299.172	299.907	412.992	416.586	345.7	166.799	128.222	108.403	134.143	128.678	141.135
	ENSMUSG00000079419.5	Ms4a6c	1.36396	4.48447	74.6707	1.01905e-08	1.83397e-07	54.462	42.7095	50.9191	36.6533	36.7396	21.5619	14.4345	13.9754	19.4927	16.0597	17.6986	12.8723
	ENSMUSG00000039997.17	Ifi203	1.35706	6.75555	146.267	1.63317e-11	8.98449e-10	244.165	228.972	217.172	177.274	187.205	125.045	74.4287	81.3117	83.4052	82.312	74.4795	64.714
	ENSMUSG00000074170.6	Plekhf1	1.34979	3.22141	103.385	4.9709e-10	1.52423e-08	11.7544	12.2713	16.4297	15.7975	15.6077	15.0366	5.16488	5.49734	5.69424	4.3778	6.40163	6.93751
	ENSMUSG00000039699.15	Batf2	1.34516	3.36328	62.4031	4.93087e-08	6.77082e-07	21.4191	19.4695	23.145	16.7313	17.0107	12.5541	5.57264	5.00868	10.9868	6.32089	7.90789	7.6692
	ENSMUSG00000020676.3	Ccl11	1.34357	2.42594	58.7815	8.20884e-08	1.0336e-06	12.2115	13.9851	11.5399	8.79368	9.73291	6.52532	4.56684	2.71202	3.63864	3.88618	5.27193	4.74244
	ENSMUSG00000026073.14	Il1r2	1.34238	0.0807051	37.2723	3.01236e-06	2.1251e-05	2.28558	1.98808	2.3471	1.01166	2.01673	1.20577	0.733957	0.708545	0.756081	0.421393	0.860723	0.81299
	ENSMUSG00000043613.9	Mmp3	1.34167	4.85686	86.0084	2.81065e-09	6.36337e-08	53.2866	52.5813	47.3984	42.6454	31.9169	33.9742	23.0517	21.3785	15.5469	15.5681	12.6957	15.2842
	ENSMUSG00000047735.15	Samd9l	1.34088	6.93546	211.295	3.67363e-13	4.41824e-11	263.298	226.093	236.21	204.978	221.753	164.268	79.512	93.4791	99.0467	89.0075	82.5487	76.1501
	ENSMUSG00000069874.8	Irgm2	1.33792	7.50814	40.9692	1.48858e-06	1.16829e-05	409.118	336.534	354.999	319.53	328.727	217.321	114.497	81.6293	248.42	92.0275	121.389	119.808
	ENSMUSG00000026088.16	Mitd1	1.32255	4.11995	223.123	2.06847e-13	2.68536e-11	33.9571	33.1804	35.0109	30.4277	33.846	22.5549	11.9336	12.6072	13.6331	12.9461	13.0991	11.3006
	ENSMUSG00000078349.5	AW011738	1.31868	4.46935	332.002	2.89438e-15	8.27461e-13	44.732	42.4352	48.8327	38.9879	42.3513	33.7614	15.6577	15.417	18.0278	15.9193	18.0752	17.6148
	ENSMUSG00000028967.11	Errfi1	1.31295	7.53771	68.0868	2.31241e-08	3.62858e-07	286.873	214.096	283.934	303.343	328.902	278.248	103.76	82.9243	100.299	125.903	125.128	144.279
	ENSMUSG00000100220.2	Gm29331	1.30665	1.32224	28.9131	1.7761e-05	9.68219e-05	1.76316	4.11327	6.12854	3.65755	5.26103	3.83008	1.87567	1.46596	2.03197	1.56852	2.09801	0.921389
	ENSMUSG00000038677.15	Scube3	1.30519	3.03002	97.6028	8.601e-10	2.40204e-08	12.7339	12.2713	10.6272	11.7508	9.29449	10.4973	7.04055	4.88652	3.99306	3.76912	3.84636	3.71265
	ENSMUSG00000067212.9	H2-T23	1.30337	8.51863	113.448	2.02838e-10	7.32359e-09	783.104	681.158	754.854	563.963	634.656	442.729	262.458	228.249	330.408	238.04	254.236	250.889
	ENSMUSG00000115338.3	Pnp	1.30178	6.56476	220.906	2.2986e-13	2.89677e-11	182.977	177.488	189.007	149.103	156.516	116.25	62.1145	62.4253	64.6922	60.4933	70.2834	74.1718
	ENSMUSG00000026222.17	Sp100	1.29466	7.50684	271.847	2.5184e-14	4.73377e-12	380.646	349.422	359.106	308.012	330.305	240.231	139.561	131.57	139.19	129.976	134.703	127.179
	ENSMUSG00000015437.6	Gzmb	1.28938	3.45708	39.0996	2.11469e-06	1.57531e-05	19.656	13.231	11.9963	13.5407	15.52	6.45439	4.94741	3.02964	7.25366	4.54168	5.94437	7.18141
	ENSMUSG00000053175.18	Bcl3	1.28416	4.54003	154.064	9.65175e-12	5.86465e-10	46.9523	42.778	43.0302	36.4977	33.4952	27.2361	15.0597	13.6334	17.7915	16.3641	15.1165	16.585
	ENSMUSG00000097820.4	E530011L22Rik	1.28085	3.92115	115.892	1.64808e-10	6.23446e-09	20.309	25.4337	26.8613	18.599	20.255	16.0296	9.59581	8.16049	8.48229	9.29405	8.9838	8.0215
	ENSMUSG00000107451.2	Gm44421	1.27353	0.480443	31.3039	1.03901e-05	6.1028e-05	1.43665	1.23398	1.89072	2.87935	3.15662	2.55339	0.951426	0.904006	1.03961	0.538446	0.914518	1.02979
	ENSMUSG00000053835.18	H2-T24	1.27186	5.43374	163.156	5.3786e-12	3.67833e-10	93.0556	78.4264	77.7151	65.3689	85.8425	61.7068	30.6359	30.7362	36.41	32.1195	29.6681	31.7608
	ENSMUSG00000108801.3	Gm39090	1.26986	0.0594496	47.8625	4.44263e-07	4.26016e-06	1.89376	2.74218	2.08631	1.32294	2.45515	1.63133	0.652406	0.904006	0.708826	0.936428	0.753133	1.05689
	ENSMUSG00000060519.12	Tor3a	1.26967	6.93312	439.05	1.34433e-16	7.10416e-14	234.435	226.71	246.641	198.675	207.899	168.665	93.4028	86.9312	88.8632	89.9907	83.4901	89.5644
	ENSMUSG00000022014.16	Epsti1	1.26943	4.0572	145.352	1.73985e-11	9.42274e-10	32.5205	31.6036	29.4692	26.4589	25.4283	17.9446	11.254	11.7032	11.861	11.1669	11.6198	10.2437
	ENSMUSG00000075602.11	Ly6a	1.26883	9.30099	155.483	8.7928e-12	5.48749e-10	1203.72	1087.48	1204.98	991.662	1128.93	806.373	417.241	360.014	511.3	377.966	475.55	523.593
	ENSMUSG00000031821.12	Gins2	1.26622	5.25507	152.146	1.09606e-11	6.49062e-10	48.0624	51.9643	55.2221	50.8166	60.2388	48.6562	25.0633	23.1377	16.8701	21.5144	21.0339	23.2786
	ENSMUSG00000068417.9	Pnp2	1.26516	0.971461	41.3451	1.38888e-06	1.10194e-05	5.09357	4.18183	4.23782	2.64589	3.68272	1.98597	1.79412	1.2705	1.74844	1.49828	1.47937	1.30078
	ENSMUSG00000063268.13	Parp10	1.26324	6.14956	210.228	3.87455e-13	4.59649e-11	143.338	129.499	135.545	118.287	127.668	90.5033	53.4701	48.1811	58.7145	50.7544	50.2985	48.9149
	ENSMUSG00000073144.6	4930599N23Rik	1.26131	0.0706517	32.0239	8.8835e-06	5.34758e-05	2.8733	1.64531	1.82552	2.10114	1.75368	1.20577	0.951426	0.977304	0.708826	0.608678	0.56485	0.948488
	ENSMUSG00000012428.10	Steap4	1.25535	4.73768	80.8621	4.95501e-09	1.02019e-07	54.5273	45.9315	42.1174	42.1007	32.443	28.5128	15.3044	18.7642	13.8457	17.2537	18.8552	19.0782
	ENSMUSG00000027570.16	Col9a3	1.24471	0.349506	44.0989	8.46262e-07	7.25711e-06	2.15497	2.67363	2.93388	2.41242	1.75368	1.20577	0.815508	0.952872	1.13412	0.959839	0.833826	0.84009
	ENSMUSG00000016496.8	Cd274	1.24393	5.91027	42.9977	1.02904e-06	8.54954e-06	155.158	129.088	127.265	94.5515	92.2435	55.4652	39.0356	34.9875	73.2927	37.4805	45.0804	46.4217
	ENSMUSG00000037447.17	Arid5a	1.24217	5.07073	142.787	2.08169e-11	1.10008e-09	65.1063	61.6305	56.3304	51.8282	57.1699	35.3218	26.205	25.2633	21.4774	22.5211	22.7285	20.2434
	ENSMUSG00000021453.3	Gadd45g	1.2415	4.59192	91.6741	1.5522e-09	3.88921e-08	47.6706	51.6901	47.7896	38.2875	30.6894	25.8176	18.2674	15.4658	15.6414	15.8022	20.3346	17.0999
	ENSMUSG00000118671.1	Eppk1	1.23835	2.66555	78.5557	6.44813e-09	1.26917e-07	13.191	11.6543	13.6262	9.33842	10.7851	6.52532	3.69697	4.69106	4.96178	4.63532	4.35741	5.28443
	ENSMUSG00000028862.7	Map3k6	1.23591	5.21504	106.551	3.72125e-10	1.19954e-08	46.7564	58.3399	83.5829	52.9177	56.2931	47.1667	25.7972	24.3837	27.8096	23.9023	21.2222	23.4412
	ENSMUSG00000022587.16	Ly6e	1.23236	10.7695	278.949	1.90834e-14	3.87216e-12	3025.84	3019.28	3489.49	2634.76	3123.83	2410.25	1181.59	1181.15	1300.77	1202.63	1330.84	1338.02
	ENSMUSG00000012519.15	Mlkl	1.23125	3.52833	87.1226	2.49485e-09	5.75278e-08	25.2719	25.091	25.2965	20.3111	18.589	10.9228	9.51426	8.06276	10.3252	8.56832	8.55344	8.50929
	ENSMUSG00000074874.11	Ctla2b	1.23049	3.06759	92.3855	1.44373e-09	3.68088e-08	9.66472	11.6543	14.6694	13.852	16.5723	10.6391	5.1377	5.57063	5.5761	5.31423	5.97127	5.14894
	ENSMUSG00000081076.4	Rpsa-ps4	1.22462	0.308975	33.851	6.02567e-06	3.86045e-05	2.15497	1.64531	1.82552	2.3346	1.57831	1.5604	0.434937	1.1239	0.590689	0.983249	0.806928	0.78589
	ENSMUSG00000024677.14	Ms4a6b	1.21665	4.98163	77.1094	7.62981e-09	1.45258e-07	63.539	50.1819	46.5508	45.9139	46.1217	28.0163	19.7081	21.6962	21.2175	20.3673	21.5988	16.0701
	ENSMUSG00000063975.14	Slco1a5	1.2083	1.51359	43.7057	9.07119e-07	7.6718e-06	5.74659	5.89569	6.12854	5.29177	5.08567	3.75915	2.01159	2.80975	1.58305	2.83269	1.69455	2.87256
	ENSMUSG00000027555.9	Car13	1.1989	2.4586	58.2352	8.88242e-08	1.103e-06	12.8645	11.7228	10.7575	8.32676	7.71618	6.31254	3.61542	5.00868	4.11119	3.90959	4.62639	3.92945
	ENSMUSG00000072620.4	Slfn2	1.1937	6.02996	120.672	1.10948e-10	4.48913e-09	136.024	125.66	123.549	110.349	113.025	70.0053	53.9322	53.1409	53.7999	44.3867	49.1957	42.3026
	ENSMUSG00000094974.2	Rps19-ps2	1.18427	1.319	43.8946	8.77298e-07	7.47031e-06	3.46102	4.11327	3.32506	3.42409	4.9103	2.90802	1.11453	1.41709	2.0556	2.08355	1.39868	1.59888
	ENSMUSG00000096681.2	Rps19-ps1	1.18427	1.319	43.8946	8.77298e-07	7.47031e-06	3.46102	4.11327	3.32506	3.42409	4.9103	2.90802	1.11453	1.41709	2.0556	2.08355	1.39868	1.59888
	ENSMUSG00000049502.18	Dtx3l	1.17993	6.20515	181.225	1.82416e-12	1.5294e-10	158.554	138.069	135.023	129.026	125.563	92.2765	58.0913	54.2404	66.8187	52.3463	56.1353	56.0692
	ENSMUSG00000036986.17	Pml	1.17612	6.45416	455.453	8.95561e-17	5.57775e-14	168.545	156.304	161.428	146.847	151.167	119.3	70.6502	64.893	66.6297	65.55	64.7694	67.4511
	ENSMUSG00000027951.17	Adar	1.17405	6.86358	453.691	9.34878e-17	5.62184e-14	218.109	206.143	214.173	198.908	216.579	170.722	90.3583	90.1319	99.4011	83.1314	92.8236	86.8544
	ENSMUSG00000029657.16	Hsph1	1.16342	5.96773	77.2753	7.483e-09	1.42931e-07	77.7096	66.018	93.2973	83.3454	99.872	68.0903	35.7192	36.7222	47.6095	34.601	35.1014	27.9398
	ENSMUSG00000042726.15	Trafd1	1.1617	7.21054	269.837	2.72742e-14	4.90346e-12	273.355	265.786	278.131	239.686	250.688	189.021	114.987	112.243	118.256	102	110.791	110.783
	ENSMUSG00000039501.15	Znfx1	1.15679	7.42714	196.882	7.70461e-13	7.82482e-11	335.523	335.78	345.741	288.246	311.716	214.413	138.337	130.983	154.359	126.371	135.16	136.257
	ENSMUSG00000078606.9	Gvin2	1.15131	6.40968	28.8273	1.81147e-05	9.85653e-05	225.684	123.261	131.698	146.068	139.768	91.4963	53.3342	44.1497	131.346	50.2862	56.3774	50.6764
	ENSMUSG00000121501.1	ENSMUSG00000121501.1	1.14727	5.00717	60.1515	6.75141e-08	8.80612e-07	76.926	59.6424	43.0954	51.8282	47.7877	29.1512	23.1061	24.0172	28.1168	22.685	21.5719	19.8099
	ENSMUSG00000038305.16	Spats2l	1.1471	4.84743	335.061	2.61904e-15	7.74127e-13	44.079	49.085	53.4617	48.1707	48.4015	43.7622	20.4964	22.9178	21.0994	22.4509	21.814	20.7583
	ENSMUSG00000029366.11	Dck	1.14647	4.08646	131.393	4.78357e-11	2.28943e-09	28.9942	29.8898	31.4251	26.9258	26.919	20.2143	12.3957	14.122	12.1446	11.5415	12.346	11.7342
	ENSMUSG00000025279.8	Dnase1l3	1.14645	2.00039	41.7681	1.28531e-06	1.0334e-05	6.92203	6.23846	6.51972	6.22561	6.66398	5.67419	2.79991	2.02791	2.52815	4.54168	3.14702	2.19507
	ENSMUSG00000046694.7	Tent5b	1.14558	4.19764	90.8458	1.68979e-09	4.16807e-08	25.2719	23.1714	32.4682	24.9803	28.4973	32.1301	12.8578	13.7556	11.4121	13.1334	9.87142	14.2273
	ENSMUSG00000105338.2	Gm43802	1.14486	3.30086	35.614	4.1935e-06	2.83562e-05	23.4435	18.7839	20.2763	16.1088	14.9939	9.71705	6.38814	5.42404	13.1133	6.555	8.23067	7.07301
	ENSMUSG00000005483.11	Dnajb1	1.14416	5.84577	119.861	1.18537e-10	4.74122e-09	94.2311	82.951	107.249	79.6878	86.8071	60.7138	38.6279	43.2701	38.9618	35.9588	36.5538	38.2105
	ENSMUSG00000091269.3	Gm6682	1.13727	2.99749	65.1688	3.39007e-08	4.96802e-07	9.92593	10.1461	10.9531	10.5835	12.8895	12.696	4.62121	5.30187	4.53649	7.51484	4.4381	4.01075
	ENSMUSG00000057143.16	Trim12c	1.13169	5.84996	255.399	4.91695e-14	7.79515e-12	113.169	100.432	98.4478	94.0846	102.064	78.2329	43.7112	45.1759	48.3183	42.1861	46.1025	42.14
	ENSMUSG00000031070.16	Mrgprf	1.12932	2.43861	65.5475	3.22357e-08	4.76002e-07	5.8772	6.71834	6.78051	8.8715	9.99596	8.2985	4.24064	4.30014	2.81168	3.20727	2.87804	3.73975
	ENSMUSG00000049401.11	Ogfr	1.12647	6.19842	364.053	1.05746e-15	3.8419e-13	125.772	126.689	134.046	116.575	123.284	100.362	58.5263	57.3922	58.5727	51.1758	53.7145	53.5218
	ENSMUSG00000029322.13	Plac8	1.1208	5.80843	51.0439	2.64652e-07	2.7686e-06	138.702	117.64	108.619	91.9834	89.2622	59.8627	39.1172	38.4325	61.6206	35.7247	52.1006	52.0043
	ENSMUSG00000006344.18	Ggt5	1.12007	4.20036	195.145	8.45119e-13	8.42173e-11	30.3002	32.015	30.9035	25.2916	31.1278	21.8456	12.3414	12.8271	12.8298	13.0632	12.6688	15.1758
	ENSMUSG00000042622.15	Maff	1.11886	4.55573	214.013	3.21131e-13	3.88903e-11	38.463	36.3339	35.0109	33.2292	34.6351	30.0023	14.4073	15.417	15.9013	15.2872	15.0358	19.6202
	ENSMUSG00000042510.8	AA986860	1.11627	6.6555	260.568	3.96789e-14	6.52793e-12	145.559	138.48	165.992	140.777	159.059	132.776	68.3939	68.2158	72.4421	68.3124	59.2823	70.432
	ENSMUSG00000037321.18	Tap1	1.1151	7.20988	53.2029	1.88609e-07	2.09101e-06	302.937	246.933	265.679	237.663	236.834	161.502	111.426	86.2715	171.016	95.7732	107.026	98.6428
	ENSMUSG00000029780.15	Nt5c3	1.11504	4.52232	154.38	9.45277e-12	5.80166e-10	43.6872	43.2579	45.1817	36.1864	38.4055	25.6048	17.3159	17.4449	19.3746	16.8089	18.64	17.7503
	ENSMUSG00000020572.9	Nampt	1.11041	6.45341	237.598	1.06231e-13	1.50615e-11	162.407	145.541	166.709	130.816	147.397	112.775	60.8369	62.6452	78.6561	61.6638	69.342	67.8576
	ENSMUSG00000090272.10	Mndal	1.10704	6.38098	113.398	2.03703e-10	7.33962e-09	173.312	163.365	155.104	133.15	136.348	87.879	68.8289	67.1652	66.6769	70.8174	63.8549	56.9906
	ENSMUSG00000036912.19	Piwil4	1.10664	2.63997	61.567	5.53568e-08	7.4259e-07	9.79533	11.8599	11.1487	10.2723	10.4344	7.80201	4.13191	5.20414	3.99306	4.5885	5.32572	5.23023
	ENSMUSG00000003051.14	Elf3	1.10507	4.85677	183.836	1.5728e-12	1.33795e-10	51.9805	53.0612	45.1165	42.8011	49.1907	36.8822	23.7041	25.361	19.4455	20.9526	19.5815	20.677
	ENSMUSG00000107222.2	Gm43198	1.09373	1.4155	31.0843	1.09032e-05	6.34863e-05	5.68129	3.97616	6.51972	3.65755	5.26103	3.97193	2.12032	2.12564	1.65393	2.97316	2.34009	2.41187
	ENSMUSG00000024222.18	Fkbp5	1.09163	4.68143	65.393	3.29041e-08	4.84232e-07	30.1696	31.6722	51.897	36.5755	33.4952	33.8324	16.9897	16.7608	16.8464	17.0898	14.9013	19.6202
	ENSMUSG00000021091.9	Serpina3n	1.08812	7.24422	65.8941	3.07892e-08	4.57485e-07	263.168	288.615	301.211	202.799	206.057	168.594	106.342	105.329	91.8166	112.207	108.666	148.858
	ENSMUSG00000025981.14	Coq10b	1.08688	4.66151	88.1363	2.24082e-09	5.29508e-08	39.769	38.5276	38.5968	38.9879	42.439	35.7474	13.9724	17.3716	22.966	17.1366	19.1511	19.4847
	ENSMUSG00000030966.14	Trim21	1.08414	5.19448	159.787	6.65699e-12	4.3808e-10	70.9182	63.7557	61.5462	60.4663	61.028	41.7762	28.3797	25.8741	33.7401	27.6012	27.9197	26.0428
	ENSMUSG00000101939.2	Gm28438	1.08045	6.86248	32.0534	8.82703e-06	5.32277e-05	220.917	177.762	122.31	158.286	157.13	110.789	77.8538	76.1809	92.1474	77.466	71.3862	52.8172
	ENSMUSG00000030087.12	Klf15	1.07558	5.69892	72.154	1.38443e-08	2.35313e-07	54.3967	64.9211	82.6701	73.6957	78.4771	77.9492	35.7464	30.6385	37.4969	30.9958	34.7248	35.3109
	ENSMUSG00000060680.3	Gm8894	1.07309	0.0431214	28.7775	1.83234e-05	9.94835e-05	1.63255	1.71386	1.76033	1.71204	1.84136	1.20577	0.842691	1.17276	0.708826	0.772553	0.56485	0.596193
	ENSMUSG00000075122.6	Cd80	1.07023	1.68934	59.9528	6.94414e-08	9.02102e-07	5.9425	4.45604	6.06334	5.05831	4.20883	4.18472	2.31061	2.34553	2.33913	2.38789	2.42078	2.46607
	ENSMUSG00000033538.14	Casp4	1.06451	3.98376	54.5873	1.52565e-07	1.74579e-06	35.3938	31.6036	28.8824	22.4122	22.9732	14.7529	11.7977	13.4868	12.5462	11.799	13.0722	12.0593
	ENSMUSG00000097440.3	Gm6277	1.06346	1.91248	61.6511	5.47129e-08	7.36787e-07	7.05264	7.19822	6.38933	6.38125	4.20883	6.66717	2.85428	2.51656	2.78805	2.85611	3.3891	3.79395
	ENSMUSG00000034575.14	ENSMUSG00000034575.14	1.06332	5.14357	353.34	1.46642e-15	5.01428e-13	59.7515	54.7065	63.5673	51.9839	57.0822	46.5284	27.0749	27.5111	28.5657	24.7217	25.8217	25.9886
	ENSMUSG00000097194.4	9330175E14Rik	1.06145	3.16026	28.9813	1.74853e-05	9.5558e-05	24.3577	16.1103	12.6483	17.3539	15.0816	7.37645	7.33957	5.83939	10.2071	6.57841	8.39205	6.17872
	ENSMUSG00000037362.9	Ccn3	1.05958	3.5593	93.3444	1.31034e-09	3.42716e-08	14.8236	16.1789	13.1698	15.7197	19.0274	16.5261	7.93761	8.8446	7.6317	8.70878	6.32094	6.17872
	ENSMUSG00000083261.5	Gm7816	1.05894	3.67115	72.4557	1.33393e-08	2.28511e-07	14.4318	17.2072	20.2763	18.5212	21.4826	17.6609	9.32397	7.42751	11.0341	8.54491	9.46795	6.66652
	ENSMUSG00000057135.13	Scimp	1.05582	2.08775	55.1663	1.39774e-07	1.62285e-06	7.11794	8.43221	8.80163	7.54856	6.92703	4.32657	3.56105	3.83592	3.40237	3.13703	3.44289	3.38746
	ENSMUSG00000020464.16	Pnpt1	1.05006	4.32682	137.208	3.10525e-11	1.58341e-09	37.5488	33.8659	34.4893	28.8713	31.2155	21.8456	15.1956	15.4414	16.3266	13.8591	15.6544	14.3086
	ENSMUSG00000002227.16	Mov10	1.04706	5.25342	206.899	4.58178e-13	5.18842e-11	64.5186	63.0702	66.762	56.7309	61.9925	48.4434	29.7117	30.8828	30.4795	30.9021	27.2742	25.6905
	ENSMUSG00000037997.13	Parp11	1.04197	4.84206	162.366	5.65228e-12	3.80579e-10	57.9883	44.4919	48.3764	46.5365	46.8232	36.173	22.4265	22.2092	25.3996	22.5445	24.2347	19.3763
	ENSMUSG00000066677.13	Ifi208	1.04183	5.77909	257.802	4.44829e-14	7.18275e-12	100.892	91.3832	88.6683	87.2364	93.6464	73.3389	41.4278	43.49	49.6415	41.671	40.3733	43.2782
	ENSMUSG00000101438.4	Gm19412	1.04074	2.38426	46.4909	5.59538e-07	5.16177e-06	9.86063	8.56932	9.06242	6.53689	7.97923	5.81604	3.45232	3.56716	4.84365	4.91625	3.3084	3.14356
	ENSMUSG00000025044.17	Msr1	1.03163	2.11337	29.7015	1.48412e-05	8.30337e-05	7.90156	7.81522	9.84478	6.22561	6.57629	4.25564	2.66399	3.2251	4.15845	3.32432	3.14702	4.36305
	ENSMUSG00000070803.7	Cited4	1.02906	1.06567	31.4958	9.96302e-06	5.90167e-05	3.52632	3.22206	3.71624	4.04665	3.15662	2.26968	1.68538	1.80801	1.08687	1.5217	2.12491	1.54468
	ENSMUSG00000056116.19	H2-T22	1.02881	7.16785	68.1402	2.29653e-08	3.6113e-07	294.905	226.367	259.876	214.784	224.997	152.423	116.672	97.4617	143.277	98.9336	106.514	110.377
	ENSMUSG00000093651.2	Gm5873	1.02703	0.0798609	29.5766	1.52666e-05	8.49414e-05	1.30604	1.37109	1.04316	2.49024	1.75368	1.41855	1.06016	0.855141	0.567061	0.725732	0.67244	0.677492
	ENSMUSG00000068428.8	Gmnc	1.02276	1.34833	45.8054	6.29021e-07	5.64856e-06	4.04874	3.7705	4.17262	4.28011	4.47188	4.3975	1.44073	2.61429	1.93746	2.13037	1.77524	2.43897
	ENSMUSG00000037580.11	Gch1	1.02248	4.39001	103.091	5.10831e-10	1.54929e-08	38.463	37.9107	36.8364	32.451	30.1633	22.3421	15.5762	15.1971	18.1696	14.4912	15.8965	18.3465
	ENSMUSG00000024678.7	Ms4a4d	1.0219	5.4822	129.235	5.63876e-11	2.58028e-09	71.7018	72.3936	84.3	62.3339	62.5186	51.9898	27.0749	29.0748	38.5129	31.7215	35.3165	38.0479
	ENSMUSG00000030376.9	Slc8a2	1.01836	0.223821	43.0508	1.01931e-06	8.47672e-06	1.69786	1.64531	1.76033	1.86768	1.66599	1.98597	1.06016	0.806276	0.826964	1.1003	0.67244	0.758791
	ENSMUSG00000102917.2	Gm37724	1.01814	-0.218538	35.3656	4.41022e-06	2.95807e-05	1.37135	1.02832	1.23875	0.933842	0.789155	1.41855	0.38057	0.586382	0.637944	0.561857	0.56485	0.623292
	ENSMUSG00000001473.8	Tubb6	1.01172	4.87944	129.204	5.65209e-11	2.58028e-09	42.7729	41.1327	46.2248	42.9567	43.4035	38.8682	24.8458	22.7468	17.1772	22.9425	18.8014	20.135
	ENSMUSG00000028214.14	Gem	1.00752	4.5619	190.714	1.07376e-12	1.01768e-10	35.1979	34.8257	35.7281	32.8401	33.3199	32.6266	15.848	17.2006	16.303	18.8222	15.493	18.0755
	ENSMUSG00000019905.9	Gprc6a	1.00583	2.19539	40.8916	1.51012e-06	1.18094e-05	4.63646	5.62147	6.32413	7.47073	8.85607	8.72407	2.88146	2.83418	3.2606	3.53502	3.60428	4.52564
	ENSMUSG00000031609.4	Sap30	1.00136	2.56893	91.4324	1.59105e-09	3.98082e-08	9.40352	9.11775	9.4536	10.5835	7.97923	7.23459	5.24643	5.15528	4.72551	4.3778	3.57738	3.76685
	ENSMUSG00000024338.16	Psmb8	1.00099	6.95622	67.7978	2.40035e-08	3.73413e-07	242.336	200.042	224.539	173.383	179.051	130.932	101.748	85.1965	118.587	87.6497	91.9091	89.8625
	ENSMUSG00000036040.15	Adamtsl2	0.992105	6.55299	50.7247	2.78484e-07	2.88732e-06	82.2808	107.082	128.569	114.785	121.968	145.472	54.5847	58.7115	46.5699	56.4198	53.7683	81.9223
	ENSMUSG00000032596.15	Uba7	0.990677	7.10151	164.983	4.799e-12	3.37459e-10	254.352	237.747	238.883	218.286	212.458	162.424	116.781	103.79	119.248	107.642	108.075	110.946
	ENSMUSG00000042901.11	Aida	0.98248	6.13084	171.502	3.2234e-12	2.47634e-10	120.94	112.635	117.811	99.2207	108.728	83.4815	49.447	53.9961	65.4956	54.1724	49.5454	52.6817
	ENSMUSG00000043740.16	B430306N03Rik	0.98235	2.3527	35.9746	3.89924e-06	2.66349e-05	12.0156	11.3115	10.4968	9.18278	7.01471	4.3975	5.4639	4.12911	5.03267	3.86277	4.94916	4.20045
	ENSMUSG00000005667.9	Mthfd2	0.982342	2.92717	41.6074	1.32363e-06	1.05982e-05	15.8031	12.2027	12.9091	7.7042	10.0836	7.66016	6.68716	6.27918	5.5761	4.75237	5.21813	5.20314
	ENSMUSG00000028480.15	Glipr2	0.972827	5.20914	102.087	5.60942e-10	1.67792e-08	56.2905	48.3309	49.5499	44.124	41.6498	39.5065	26.2594	28.3174	20.5323	24.1598	21.1146	22.1675
	ENSMUSG00000066258.14	Trim12a	0.972134	5.45803	181.078	1.83956e-12	1.53493e-10	75.8811	72.6678	79.2147	64.8242	78.0387	58.4442	40.3405	38.7257	33.0549	35.5843	38.4636	32.5738
	ENSMUSG00000107023.3	Gm42715	0.966785	5.7015	85.7512	2.88956e-09	6.50208e-08	75.2281	72.5307	61.7418	66.8475	78.3017	65.6787	41.4278	28.3663	37.5678	38.9788	33.5144	35.0941
	ENSMUSG00000022769.10	Sdf2l1	0.965087	4.20157	105.816	3.97736e-10	1.27035e-08	24.9454	23.0343	26.1441	23.346	25.253	22.7677	12.9938	12.143	11.294	12.197	12.7495	13.1704
	ENSMUSG00000097572.4	Gm26797	0.960422	2.06421	53.8252	1.71375e-07	1.93313e-06	7.05264	8.70642	7.56288	6.14779	7.54081	5.53234	3.23485	3.83592	3.37874	4.42462	3.09322	3.87525
	ENSMUSG00000070436.13	Serpinh1	0.960201	8.44781	78.0253	6.85662e-09	1.33452e-07	416.824	369.989	466.095	459.606	431.142	563.873	232.447	238.291	218.271	234.06	219.861	248.694
	ENSMUSG00000121057.1	ENSMUSG00000121057.1	0.959314	0.671384	30.5338	1.23149e-05	7.06375e-05	2.67739	2.46796	2.3471	2.56807	2.89357	1.84411	1.46791	0.977304	1.25226	1.40464	1.53316	0.948488
	ENSMUSG00000022346.18	Myc	0.958997	3.63015	61.3911	5.67284e-08	7.58073e-07	24.8801	18.0298	19.5592	18.3656	21.0441	12.4832	10.1395	10.9947	9.59278	10.0198	9.17208	8.88869
	ENSMUSG00000022901.14	Cd86	0.957116	3.26415	73.6547	1.15211e-08	2.02741e-07	15.6725	14.5336	16.9513	15.0193	14.2048	11.4902	7.14929	7.62297	7.48993	7.39778	8.63413	6.99171
	ENSMUSG00000118157.2	Gm9902	0.956107	0.420366	44.1435	8.39643e-07	7.21694e-06	1.76316	1.71386	1.43434	1.71204	2.01673	1.91504	1.14171	0.757411	0.826964	0.936428	0.833826	0.921389
	ENSMUSG00000032265.15	Tent5a	0.955475	4.51448	65.9595	3.05244e-08	4.55749e-07	40.618	38.7333	35.8585	38.9879	34.6351	27.2361	21.5838	24.1638	15.9722	18.0497	16.9724	14.688
	ENSMUSG00000027368.7	Dusp2	0.95464	2.33036	44.0977	8.46434e-07	7.25711e-06	8.03217	7.33533	7.1717	6.38125	6.22556	5.74512	5.02896	3.445	2.83531	3.41796	3.55048	2.87256
	ENSMUSG00000074482.6	Gm16589	0.954536	2.71739	96.8878	9.22123e-10	2.52052e-08	9.79533	10.6945	11.9311	10.7392	9.38218	7.58923	4.78431	5.96156	4.98541	4.72896	5.35262	5.23023
	ENSMUSG00000031897.10	Psmb10	0.953612	6.10766	177.622	2.2454e-12	1.81284e-10	115.258	105.711	110.053	92.5282	99.2582	85.964	54.3672	51.7727	60.581	49.9584	47.5819	50.1615
	ENSMUSG00000045092.9	S1pr1	0.95327	8.6152	371.345	8.50857e-16	3.15704e-13	519.283	514.022	494.717	539.216	566.175	490.676	274.119	264.678	282.704	252.719	264.914	274.221
	ENSMUSG00000120390.1	ENSMUSG00000120390.1	0.952424	1.42185	43.8818	8.79296e-07	7.48367e-06	3.98343	3.49628	4.7594	3.42409	3.50736	3.97193	2.09314	2.02791	2.3155	1.77921	1.69455	2.05957
	ENSMUSG00000035517.18	Tdrd7	0.951078	6.0973	275.235	2.20436e-14	4.36839e-12	109.12	110.853	122.31	94.7849	104.081	92.7021	56.6234	56.3904	58.4782	54.6406	51.5358	50.2699
	ENSMUSG00000028410.14	Dnaja1	0.950669	7.05026	155.991	8.50541e-12	5.43318e-10	172.463	172.757	211.826	174.94	197.289	150.933	87.2865	97.2418	110.742	89.8269	88.4393	85.2284
	ENSMUSG00000058927.7	Gm10053	0.948998	4.04402	72.5203	1.32337e-08	2.27264e-07	29.2554	21.6632	23.145	21.4784	20.6934	23.406	10.8734	11.6544	12.8298	11.6819	14.2826	11.1109
	ENSMUSG00000026620.12	Mark1	0.94811	2.94825	100.295	6.64191e-10	1.94669e-08	10.6443	11.3801	11.7355	11.2839	12.1881	10.2135	6.85027	6.25475	5.3162	5.75903	5.48711	5.25733
	ENSMUSG00000004951.11	Hspb1	0.947223	6.91635	61.9517	5.24794e-08	7.08899e-07	133.543	148.078	209.805	162.255	172.913	172.141	70.2152	73.2001	76.9785	79.2452	112.943	105.472
	ENSMUSG00000085334.8	Gm12940	0.94663	3.12311	32.4838	8.04651e-06	4.92189e-05	11.2973	11.1744	12.0615	13.3072	11.4866	11.9867	4.86586	7.6474	6.75748	5.8995	6.24024	5.52833
	ENSMUSG00000024308.16	Tapbp	0.943995	8.60393	195.255	8.40156e-13	8.42039e-11	654.197	618.979	655.428	530.189	544.254	463.085	302.472	299.055	321.571	291.791	285.141	301.782
	ENSMUSG00000046275.3	Trarg1	0.942997	4.45651	83.6596	3.62829e-09	7.90922e-08	37.3529	23.9941	30.1211	26.6923	33.4076	34.7544	16.9082	15.759	14.3419	15.6618	18.0483	16.2327
	ENSMUSG00000000791.10	Il12rb1	0.941825	1.18581	37.4899	2.88642e-06	2.04702e-05	3.85283	2.74218	3.65105	2.80153	2.63052	2.12782	1.35918	2.07677	1.48854	1.311	1.56006	1.49048
	ENSMUSG00000037887.12	Dusp8	0.938159	5.40276	88.0108	2.27068e-09	5.34392e-08	51.7846	58.7512	63.5021	51.9839	71.1993	41.5634	31.2611	33.8147	30.3378	29.8252	23.5085	27.8043
	ENSMUSG00000052485.8	Tmem171	0.935568	1.99925	42.0629	1.21811e-06	9.90792e-06	4.63646	6.51268	7.49768	4.35793	6.92703	3.97193	3.09893	3.68932	2.7408	2.48153	2.66286	3.03516
	ENSMUSG00000037816.11	Fbxw17	0.932525	4.35011	134.237	3.86449e-11	1.91457e-09	34.7408	32.632	33.1202	30.1164	32.6184	23.1223	15.25	15.0261	15.6651	16.7621	18.3173	16.6392
	ENSMUSG00000001750.17	Tcirg1	0.928404	6.76252	206.337	4.71465e-13	5.27089e-11	168.349	174.883	173.946	155.952	166.512	135.755	85.139	84.8544	85.6499	83.0846	78.4334	95.3908
	ENSMUSG00000020155.3	Kcnmb1	0.928026	2.89294	128.533	5.95175e-11	2.68893e-09	9.077	8.98064	10.0404	10.6614	11.925	10.0717	5.49109	5.15528	4.74914	5.50151	5.86368	5.09474
	ENSMUSG00000003032.9	Klf4	0.92729	7.20603	115.285	1.7346e-10	6.47743e-09	187.352	195.175	238.296	190.659	246.479	172.212	96.3658	119.915	106.324	96.8501	98.0955	129.184
	ENSMUSG00000054676.18	1600014C10Rik	0.925463	5.01813	149.31	1.3263e-11	7.60831e-10	54.9191	51.4844	54.3745	45.0579	44.368	36.8822	23.7041	25.3366	26.1793	22.7084	27.1666	26.2325
	ENSMUSG00000007659.19	Bcl2l1	0.923671	7.20848	206.209	4.74528e-13	5.27089e-11	168.545	197.094	231.646	199.609	185.188	212.215	104.358	110.729	100.606	107.338	97.2079	109.401
	ENSMUSG00000006418.18	Rnf114	0.919885	7.10733	244.96	7.67703e-14	1.14166e-11	219.154	223.282	215.347	186.691	204.917	170.509	113.084	109.654	111.168	106.753	99.7363	104.442
	ENSMUSG00000063889.17	Crem	0.918633	3.78406	150.027	1.26354e-11	7.29629e-10	19.656	17.6871	19.6896	16.8092	22.7101	16.7389	9.59581	11.3367	11.1995	9.01312	9.19898	9.48488
	ENSMUSG00000026946.10	Nmi	0.911252	4.78388	220.813	2.30891e-13	2.89677e-11	48.3889	46.0001	45.7033	40.233	42.176	35.3218	23.5954	22.8689	22.6588	22.287	22.056	23.7122
	ENSMUSG00000023087.16	Noct	0.908808	4.07017	88.0741	2.25558e-09	5.32274e-08	30.4961	27.1476	23.5362	19.922	21.7456	17.6609	11.3899	12.876	13.0424	13.4612	11.7274	12.4387
	ENSMUSG00000024371.15	C2	0.907494	5.89199	67.1878	2.59819e-08	4.00263e-07	93.4474	95.7021	113.117	71.3611	73.8298	56.3873	47.2995	43.6122	43.6165	43.1225	42.7134	48.6439
	ENSMUSG00000066443.6	Gm10163	0.904836	4.2124	38.1309	2.5475e-06	1.8434e-05	19.5254	24.8853	18.3856	26.6923	30.8647	23.6188	9.65018	14.7084	13.4913	15.1701	10.9473	12.5471
	ENSMUSG00000032085.6	Tagln	0.899759	7.45974	227.471	1.68636e-13	2.26218e-11	223.921	206.829	212.543	273.227	256.826	227.606	133.934	113.465	118.988	119.231	126.311	138.777
	ENSMUSG00000039238.7	Zfp750	0.898519	2.91212	89.4699	1.94851e-09	4.7129e-08	11.6891	11.3801	11.8659	12.996	12.9772	12.2704	6.6328	7.01216	6.75748	5.05671	7.63892	6.12452
	ENSMUSG00000025647.17	Shisa5	0.897563	8.72885	267.25	3.02461e-14	5.27461e-12	663.34	640.573	670.554	571.511	642.197	546.354	343.111	337.561	323.886	353.385	326.268	320.481
	ENSMUSG00000022180.8	Slc7a8	0.896438	3.14823	45.9026	6.18624e-07	5.58843e-06	15.5419	15.082	17.2121	10.8948	11.8373	9.43334	7.63859	7.69627	6.87562	7.74894	6.40163	6.72072
	ENSMUSG00000027322.12	Siglec1	0.896104	4.71944	54.7147	1.49645e-07	1.71801e-06	48.1277	42.5724	59.9815	36.342	45.4203	33.6196	21.611	29.5146	21.7846	26.2902	19.1242	24.7149
	ENSMUSG00000021388.15	Aspn	0.895134	3.45076	40.8556	1.52022e-06	1.18831e-05	14.1053	12.8197	12.1919	12.996	14.6432	18.2993	6.74153	7.9406	7.13552	9.55157	6.93958	7.34401
	ENSMUSG00000021130.9	Galnt16	0.894913	2.65822	58.2615	8.84876e-08	1.10145e-06	8.8811	6.23846	6.12854	10.0388	8.41765	9.78798	4.32219	4.12911	3.89855	4.49485	4.73398	4.98634
	ENSMUSG00000039911.14	Spsb1	0.888321	5.06252	130.628	5.06949e-11	2.35752e-09	39.3772	42.4352	55.3525	49.9605	47.7877	43.2657	25.8788	22.7223	25.565	24.6515	26.4134	25.013
	ENSMUSG00000037890.14	Wdr19	0.887477	5.05874	196.85	7.71759e-13	7.82482e-11	48.3889	55.3921	56.2652	50.8166	53.3118	42.7692	27.5642	28.7572	26.8881	30.153	27.5162	24.9859
	ENSMUSG00000034947.14	Tmem106a	0.887435	5.0285	70.9632	1.60504e-08	2.68363e-07	57.7271	51.9643	65.3276	45.8361	44.0173	33.0522	27.1292	28.0731	27.1244	26.6414	25.7948	26.5306
	ENSMUSG00000021322.9	Aoah	0.881279	1.55931	40.0858	1.75483e-06	1.33736e-05	5.55069	4.59315	4.17262	4.12447	4.20883	3.47544	2.55526	2.2478	2.48089	2.31766	2.2594	2.33057
	ENSMUSG00000050503.10	Fbxl22	0.880144	1.86416	53.4228	1.82315e-07	2.02767e-06	5.02827	4.5246	4.17262	4.98049	3.68272	5.74512	2.79991	2.15007	2.85893	2.78587	2.39389	2.30347
	ENSMUSG00000029581.15	Fscn1	0.877215	4.65796	54.4451	1.55897e-07	1.77945e-06	34.6102	28.93	37.7492	39.6883	26.919	41.4216	19.6537	18.2267	17.9333	17.1132	21.6257	19.566
	ENSMUSG00000036905.9	C1qb	0.876314	5.72797	39.2147	2.06882e-06	1.54709e-05	79.6034	67.869	97.5351	61.3223	59.2743	53.9048	40.3133	41.1445	31.7791	39.4704	38.4367	37.804
	ENSMUSG00000017929.14	B4galt5	0.875963	5.76474	112.258	2.24725e-10	7.94924e-09	85.2194	79.5232	85.4084	76.8085	74.1806	57.3802	39.7696	42.5127	49.3816	39.4939	38.6787	40.0533
	ENSMUSG00000001506.11	Col1a1	0.872764	8.37452	32.3765	8.2339e-06	5.01715e-05	320.634	304.656	400.963	437.816	419.129	587.704	197.19	260.012	177.159	243.729	194.443	276.66
	ENSMUSG00000032508.9	Myd88	0.872426	6.09957	174.78	2.65216e-12	2.09281e-10	117.348	108.59	108.097	94.0846	95.7508	76.3179	56.5962	57.5632	56.3517	51.8079	51.4013	54.2806
	ENSMUSG00000026208.10	Des	0.872099	7.35965	117.719	1.41444e-10	5.53057e-09	185.85	194.969	193.962	246.379	245.866	210.087	119.717	112.439	100.275	121.01	117.731	126.312
	ENSMUSG00000050075.9	Gpr171	0.867709	2.26973	28.7589	1.8402e-05	9.98481e-05	8.16277	6.99256	5.73736	8.4824	7.27776	4.04286	4.02317	3.10294	3.33148	3.95641	3.92705	3.92945
	ENSMUSG00000022018.8	Rgcc	0.865302	5.91734	56.9436	1.07265e-07	1.29633e-06	83.7827	78.015	108.619	88.8706	79.88	81.7793	45.9403	36.7955	52.7131	42.467	48.066	60.1884
	ENSMUSG00000039853.19	Trim14	0.863588	3.53244	91.0853	1.6487e-09	4.09569e-08	18.6764	17.8242	20.7979	16.8092	16.4846	15.3912	10.4657	9.55315	9.56916	10.4412	9.84452	8.428
	ENSMUSG00000048458.9	Inka2	0.8602	4.9701	156.871	8.03193e-12	5.17909e-10	47.6706	43.395	45.0513	41.6338	45.5079	35.5346	23.84	26.9492	24.5018	24.0428	20.0656	23.116
	ENSMUSG00000037944.9	Ccr7	0.856427	4.27859	64.3479	3.78406e-08	5.45661e-07	31.2797	27.0105	26.9265	30.739	28.9357	24.6118	19.0285	18.0557	12.8298	14.3976	16.9993	12.3032
	ENSMUSG00000067818.7	Myl9	0.854761	6.64008	83.9951	3.4971e-09	7.65194e-08	108.14	107.425	111.357	144.979	146.607	139.16	77.7179	68.1181	57.6748	71.5665	74.1567	69.4293
	ENSMUSG00000039682.13	Lap3	0.852417	5.469	154.011	9.6853e-12	5.86465e-10	72.0283	66.4293	68.5875	57.0422	64.7984	54.6141	34.1698	35.7205	37.7568	32.9389	33.6489	38.2647
	ENSMUSG00000035237.8	Lcat	0.84964	1.03819	40.9341	1.49828e-06	1.17432e-05	2.41618	2.67363	2.73828	2.95717	2.54283	2.62431	1.52228	1.78358	1.41765	1.35782	1.31798	1.43628
	ENSMUSG00000018500.3	Adora2b	0.849287	3.59677	69.3377	1.97008e-08	3.20787e-07	19.4601	19.9494	18.0596	14.708	16.923	14.3983	10.1938	11.6544	8.67131	9.05994	8.33826	9.59328
	ENSMUSG00000047945.7	Marcksl1	0.847703	4.7648	160.761	6.25662e-12	4.13293e-10	41.0751	38.7333	40.6179	34.9412	32.9691	36.3857	20.1159	21.012	22.0445	20.4141	20.0387	21.3816
	ENSMUSG00000070034.14	Sp110	0.846616	6.04393	81.1547	4.79421e-09	9.90594e-08	124.335	109.756	111.096	91.8278	101.012	67.9484	60.0486	57.3433	58.2892	54.9917	56.3774	50.0802
	ENSMUSG00000015656.18	Hspa8	0.846193	10.202	73.8835	1.12058e-08	1.98394e-07	1447.23	1401.94	2001.62	1436.02	1595.85	1265.98	832.307	870.534	960.318	825.812	823.362	776.595
	ENSMUSG00000117310.3	ENSMUSG00000117310.3	0.84228	6.4804	105.402	4.1304e-10	1.30253e-08	139.159	120.108	131.894	117.898	118.549	102.774	60.9456	68.3624	69.3468	68.4061	67.2709	73.142
	ENSMUSG00000031639.13	Tlr3	0.834455	5.42837	79.5838	5.72961e-09	1.14454e-07	77.4484	73.2162	64.5453	58.7542	61.1157	53.9757	33.7348	36.8444	38.7019	38.2063	35.9352	34.8773
	ENSMUSG00000058672.8	Tubb2a	0.83442	6.7098	64.344	3.78606e-08	5.45661e-07	113.691	125.318	145.064	126.691	128.895	141.429	82.3935	84.8056	66.3698	81.8906	60.7886	61.733
	ENSMUSG00000022440.10	C1qtnf6	0.831433	4.13924	35.715	4.10872e-06	2.79019e-05	16.848	19.6751	19.494	23.1126	24.7269	32.4847	12.5316	12.0697	10.7742	13.3207	11.8349	15.9617
	ENSMUSG00000045827.11	Serpinb9	0.83143	7.18913	136.741	3.21296e-11	1.6288e-09	224.117	211.148	223.105	174.94	201.673	178.524	107.43	119.524	111.546	113.495	110.845	119.239
	ENSMUSG00000068699.13	Flnc	0.830893	4.08091	30.4552	1.25322e-05	7.15849e-05	19.9825	18.5097	22.0367	28.7156	26.6559	21.1364	12.586	11.2879	12.8061	11.4947	15.6813	13.0078
	ENSMUSG00000024014.9	Pim1	0.828142	5.95359	57.1547	1.03987e-07	1.26196e-06	98.6716	102.626	107.445	77.5867	78.214	65.2532	43.684	42.3661	58.4546	45.5338	53.2035	55.5001
	ENSMUSG00000054200.8	Ffar4	0.826977	3.7209	84.2485	3.40145e-09	7.452e-08	20.5702	20.6349	22.6234	18.9881	19.9042	15.8877	10.3026	11.4833	10.2307	12.8525	11.6736	10.325
	ENSMUSG00000018143.11	Mafk	0.823715	6.65739	207.395	4.46802e-13	5.09267e-11	143.991	143.69	151.844	137.975	139.856	112.704	82.774	75.961	75.6554	79.2218	72.7042	82.7082
	ENSMUSG00000071072.13	Ptges3	0.821723	6.38149	91.9145	1.5146e-09	3.82798e-08	122.246	119.902	112.791	108.014	103.204	88.1627	54.4759	63.3049	72.7256	63.6537	58.8788	57.1803
	ENSMUSG00000080893.2	Ndufa12-ps	0.82123	2.71587	66.0387	3.02067e-08	4.52556e-07	8.8811	8.50076	8.21485	8.0933	9.11912	9.5752	4.86586	4.12911	4.65463	5.244	5.32572	5.41993
	ENSMUSG00000079197.11	Psme2	0.818632	6.31982	144.221	1.88237e-11	1.01005e-09	130.931	123.604	122.766	102.723	114.164	93.1276	70.188	65.7481	69.2523	59.3695	61.8376	63.4403
	ENSMUSG00000109408.2	A930037H05Rik	0.815837	2.58504	42.5265	1.12002e-06	9.20019e-06	12.0809	7.541	8.28005	10.4279	10.7851	7.80201	4.94741	5.03312	6.80473	4.63532	5.94437	4.90504
	ENSMUSG00000089809.10	Rasgef1b	0.815391	5.34295	163.437	5.2847e-12	3.65714e-10	49.3032	53.3354	63.0457	52.2951	61.9925	47.876	32.1038	30.9317	32.417	31.7449	28.7266	30.2432
	ENSMUSG00000039531.9	Zup1	0.814595	4.03794	144.452	1.85234e-11	9.98387e-10	24.6189	25.2966	28.1652	24.1242	24.1131	20.2143	13.0209	13.9022	13.6803	15.2404	13.8254	13.6582
	ENSMUSG00000076441.10	Ass1	0.81176	4.69034	63.7516	4.10136e-08	5.81966e-07	42.5117	33.5917	37.4232	30.1164	31.3031	28.3709	23.5954	19.204	19.4927	19.7118	17.1338	16.856
	ENSMUSG00000050565.17	Tor1aip2	0.80986	7.20267	193.934	9.01827e-13	8.86918e-11	245.014	230.48	239.795	211.826	222.191	178.808	119.254	129.81	124.659	125.739	124.536	133.683
	ENSMUSG00000008384.9	Sertad1	0.808577	4.73072	128.162	6.12492e-11	2.76001e-09	37.9406	36.1968	40.6179	39.1435	36.2134	32.201	22.5352	22.6246	19.4927	22.287	17.9676	22.032
	ENSMUSG00000028633.8	Ctps	0.808159	5.334	97.7674	8.4647e-10	2.37707e-08	65.9552	59.1626	63.5021	47.3147	54.2763	41.5634	32.43	34.5721	32.3225	29.6145	29.3722	31.3543
	ENSMUSG00000021464.16	Ror2	0.807317	2.16901	60.6666	6.27834e-08	8.26324e-07	5.15887	6.0328	7.69328	6.30343	6.40092	5.88697	3.91444	3.34727	2.92982	3.55843	3.3084	4.36305
	ENSMUSG00000038264.9	Sema7a	0.806336	6.68838	107.644	3.3728e-10	1.10147e-08	123.944	132.242	152.953	131.905	133.806	130.01	63.9086	67.8005	83.4525	70.7003	87.7669	86.6647
	ENSMUSG00000034266.7	Batf	0.806134	2.57344	65.4384	3.27062e-08	4.81726e-07	9.0117	7.19822	7.69328	6.77035	6.92703	7.87294	4.59403	4.98425	3.5205	4.47144	3.87325	4.60694
	ENSMUSG00000032724.6	Abtb2	0.805794	3.6649	122.513	9.56031e-11	3.96015e-09	15.2807	17.0015	17.0817	14.8636	15.8708	17.0226	9.78609	9.52872	9.23837	9.15358	9.79073	8.0757
	ENSMUSG00000118672.1	Muc4	0.798062	5.87116	75.6562	9.05785e-09	1.67864e-07	95.2759	92.0002	85.2128	89.9601	87.7716	73.9773	48.4683	58.7115	43.9	53.9617	45.2687	51.1371
	ENSMUSG00000026770.6	Il2ra	0.797597	1.93274	33.1448	6.99018e-06	4.36924e-05	5.55069	4.66171	5.73736	5.36959	5.17335	3.26266	3.45232	2.90748	2.41001	2.52836	3.14702	2.68287
	ENSMUSG00000034981.10	Parm1	0.795349	4.69004	55.0177	1.42941e-07	1.65301e-06	45.1238	33.7288	26.0789	33.6961	29.8125	34.2579	18.1315	20.1325	19.8944	16.3407	22.2981	20.135
	ENSMUSG00000001156.10	Mxd1	0.794284	5.54634	72.5162	1.32404e-08	2.27264e-07	79.2769	71.2281	78.1063	63.5791	60.6773	46.0319	40.9385	40.5826	38.3711	40.1494	36.2849	33.9017
	ENSMUSG00000071350.13	Setdb2	0.79345	3.43677	67.9382	2.35718e-08	3.67682e-07	16.3908	18.8525	17.1469	13.3072	17.7998	12.696	8.83467	8.69801	10.278	8.5215	9.71003	9.45778
	ENSMUSG00000019737.15	Syne4	0.793182	2.71141	57.3937	1.00406e-07	1.22447e-06	11.1014	9.32341	9.5188	10.7392	9.29449	6.7381	5.57264	5.96156	5.22169	5.82926	4.73398	5.39283
	ENSMUSG00000032344.18	Cgas	0.788368	2.3965	37.9632	2.6318e-06	1.89574e-05	9.40352	6.30702	9.06242	8.32676	5.9625	6.31254	4.02317	4.88652	4.67825	4.28416	4.68018	3.76685
	ENSMUSG00000047040.10	Prr15l	0.787929	6.18479	122.238	9.77397e-11	4.02951e-09	92.4679	94.5367	112.465	92.9951	92.2435	88.3046	56.7593	58.5161	51.9097	56.9114	48.6309	59.2399
	ENSMUSG00000069662.6	Marcks	0.786813	7.1244	34.5701	5.19024e-06	3.40529e-05	191.858	199.014	174.924	175.874	145.818	174.198	105.717	102.739	107.056	108.438	91.7208	99.8894
	ENSMUSG00000039899.6	Fgl2	0.786294	5.6628	64.7395	3.59027e-08	5.20455e-07	88.9416	72.8735	80.0622	64.7464	70.3225	56.7419	38.3832	36.991	41.7735	39.8216	49.1957	45.5545
	ENSMUSG00000056481.8	Cd248	0.783721	4.39947	37.4997	2.8809e-06	2.04477e-05	25.1413	22.2117	25.2313	25.8363	29.4618	37.095	14.2986	16.5164	13.3968	16.5982	16.8379	18.1026
	ENSMUSG00000033967.5	Rnf225	0.77962	1.71535	36.1726	3.74727e-06	2.57278e-05	5.22418	4.73026	5.73736	4.59139	3.77041	4.18472	2.85428	2.61429	2.76442	3.69889	2.12491	2.41187
	ENSMUSG00000041598.8	Cdc42ep4	0.777569	7.4989	152.112	1.09856e-11	6.49062e-10	200.282	229.246	242.403	243.888	249.11	265.197	136.57	129.468	144.719	131.685	130.561	161.162
	ENSMUSG00000048096.8	Lmod1	0.777276	4.42186	73.4264	1.18454e-08	2.0761e-07	23.8353	21.2519	24.5794	31.6728	30.0756	29.6476	17.6965	14.2931	13.6331	16.13	15.0896	16.9644
	ENSMUSG00000106990.2	Gm42547	0.777198	2.95979	38.7283	2.27031e-06	1.67266e-05	10.8402	11.1744	9.32321	11.1283	11.0482	6.80903	5.21925	6.30361	7.23003	5.85268	5.48711	5.01344
	ENSMUSG00000051397.6	Tacstd2	0.775836	6.02485	54.7431	1.49002e-07	1.71176e-06	106.704	89.258	104.837	83.3454	85.4041	67.6647	60.4563	57.6121	44.278	60.1421	43.87	47.587
	ENSMUSG00000035638.15	Muc20	0.775751	4.18977	37.2212	3.04277e-06	2.14569e-05	21.8109	22.7601	23.8622	25.7585	23.7623	26.5978	14.652	19.4728	10.7505	14.6083	11.0818	13.7937
	ENSMUSG00000115902.2	D730005E14Rik	0.773472	2.52658	41.8988	1.25503e-06	1.0128e-05	10.6443	8.84353	9.71439	8.0933	7.6285	7.16366	5.70855	5.37517	4.82002	4.91625	4.94916	4.76954
	ENSMUSG00000100801.2	Gm15459	0.773027	7.72047	62.2396	5.04325e-08	6.87103e-07	254.156	239.667	356.759	255.328	274.977	218.598	155.49	157.028	175.246	146.27	150.492	151.514
	ENSMUSG00000078915.3	Hsp25-ps1	0.772466	4.09501	38.8693	2.20978e-06	1.63498e-05	16.5215	22.8287	28.6216	21.2449	22.184	24.399	12.586	10.4327	12.2863	12.1033	15.8965	16.2869
	ENSMUSG00000093798.3	Gm8355	0.771353	4.08393	64.2393	3.83981e-08	5.5204e-07	20.4396	21.5261	24.5794	21.2449	24.6392	15.8877	13.184	13.5845	13.704	11.2605	11.3239	12.0323
	ENSMUSG00000047098.19	Rnf31	0.766733	5.85708	219.741	2.43063e-13	3.0277e-11	88.6804	84.8019	86.9079	79.7657	86.2809	72.7715	48.1965	47.2282	56.3517	46.9853	48.0391	46.5843
	ENSMUSG00000001627.13	Ifrd1	0.763599	5.68325	138.098	2.91069e-11	1.49293e-09	80.3217	73.0791	75.2376	64.7464	72.7776	53.692	40.4492	42.9281	44.089	40.5005	39.4319	39.9449
	ENSMUSG00000054364.6	Rhob	0.762751	7.87643	69.6291	1.89852e-08	3.10584e-07	276.294	266.06	334.657	284.121	326.886	332.153	156.469	155.856	150.933	195.948	192.856	220.673
	ENSMUSG00000028179.13	Cth	0.758661	2.26485	53.9509	1.68107e-07	1.89749e-06	6.46492	5.00448	5.86775	7.00381	6.13787	7.02181	4.05036	3.39613	4.04031	3.44137	2.95874	4.25465
	ENSMUSG00000027580.18	Helz2	0.757996	7.79957	103.84	4.76643e-10	1.46858e-08	365.366	373.142	370.646	332.214	367.045	255.764	214.016	189.108	224.131	200.442	186.562	206.31
	ENSMUSG00000036887.6	C1qa	0.754912	5.767	32.7254	7.64156e-06	4.70555e-05	81.9542	67.7319	93.7536	59.9993	66.026	59.3662	44.119	45.9333	37.4969	43.8248	41.1264	41.9503
	ENSMUSG00000015053.15	Gata2	0.754633	7.57695	238.043	1.04137e-13	1.48856e-11	219.677	228.081	245.142	236.885	239.114	248.813	148.259	132.864	155.918	139.879	124.563	138.723
	ENSMUSG00000031504.7	Rab20	0.75339	3.64327	52.9548	1.95999e-07	2.16057e-06	17.7622	20.3607	21.7107	13.5407	15.7831	16.597	9.81328	9.23552	10.8923	10.5582	10.3825	12.0052
	ENSMUSG00000029436.10	Mmp17	0.751724	2.38142	43.3467	9.6686e-07	8.09072e-06	6.39961	6.30702	6.25894	5.91433	5.9625	7.73108	3.34358	3.39613	3.99306	3.37114	4.27672	4.55274
	ENSMUSG00000033781.8	Asb13	0.751705	5.55487	143.548	1.97329e-11	1.05559e-09	69.2856	69.3086	72.8253	60.3106	59.362	56.1036	34.7406	37.9194	41.7971	39.5173	35.0476	41.0831
	ENSMUSG00000028464.17	Tpm2	0.751658	5.87938	75.3505	9.39388e-09	1.7208e-07	69.8733	63.8928	70.0218	88.8706	89.876	63.9765	49.447	41.9263	39.9542	43.5205	43.3051	46.6927
	ENSMUSG00000036896.6	C1qc	0.750811	5.59896	34.6927	5.06084e-06	3.33293e-05	72.616	57.7915	83.7133	58.5986	52.9611	52.8409	35.8008	40.2161	33.9055	38.9086	35.1821	41.2999
	ENSMUSG00000024805.17	Pcgf5	0.749456	4.7544	101.298	6.04082e-10	1.7825e-08	40.3568	42.6409	42.7042	36.342	37.3533	30.2151	20.3605	21.6473	26.9354	22.9893	21.8409	22.845
	ENSMUSG00000021877.13	Arf4	0.749257	7.19653	170.166	3.4935e-12	2.61473e-10	211.187	207.309	206.806	187.391	179.577	175.758	108.517	119.915	121.162	117.264	110.657	117.477
	ENSMUSG00000078153.4	Psme2b	0.749234	4.83403	84.7881	3.20712e-09	7.10659e-08	47.8665	42.161	41.1395	37.7428	38.4055	33.1231	25.471	23.7729	26.1793	20.976	22.5671	24.2
	ENSMUSG00000030862.14	Cpxm2	0.745757	1.81146	29.9712	1.39658e-05	7.88954e-05	4.37525	4.11327	3.58585	4.98049	5.78714	4.82306	2.1475	2.58986	2.59903	2.50495	3.14702	3.44166
	ENSMUSG00000022218.17	Tgm1	0.741074	2.38605	33.0248	7.17004e-06	4.45402e-05	8.48928	8.22654	7.23689	7.23727	5.61177	6.7381	4.59403	5.49734	3.59139	4.5885	3.20081	4.63404
	ENSMUSG00000031548.8	Sfrp1	0.740416	5.16686	57.7311	9.55768e-08	1.17048e-06	57.4659	53.6782	57.6996	48.015	48.1385	32.0592	27.4282	30.272	27.9986	29.1463	29.8563	33.2784
	ENSMUSG00000121503.1	ENSMUSG00000121503.1	0.740369	4.43628	70.2839	1.74779e-08	2.8947e-07	35.1979	32.4263	30.2515	29.6495	32.6184	22.8386	18.5664	16.5409	19.8944	18.8456	18.5055	17.1541
	ENSMUSG00000021025.9	Nfkbia	0.739721	6.97941	76.5875	8.11238e-09	1.52943e-07	173.9	166.45	187.051	174.706	169.668	138.592	105.201	91.3046	105.402	93.7833	107.94	101.488
	ENSMUSG00000009035.16	Tmem184b	0.737307	7.72736	204.064	5.29532e-13	5.77157e-11	258.662	271.202	285.629	275.717	285.06	267.609	159.676	165.067	173.899	162.072	155.656	169.644
	ENSMUSG00000036995.8	Asap3	0.737019	4.65308	130.639	5.06528e-11	2.35752e-09	29.7125	35.5798	38.5316	34.163	33.1445	31.9882	20.4421	21.1586	19.4218	22.4275	17.6717	20.7312
	ENSMUSG00000023307.15	Marchf5	0.736838	5.75424	197.838	7.32426e-13	7.51595e-11	79.1463	78.5635	77.9107	70.1938	71.287	62.5579	40.6123	40.949	48.2238	45.6275	43.3051	45.1751
	ENSMUSG00000022500.16	Litaf	0.732475	6.4286	166.353	4.40884e-12	3.1771e-10	122.833	121.753	115.138	105.213	107.062	96.6031	64.9144	67.5317	67.9765	62.9748	67.6475	71.516
	ENSMUSG00000024472.10	Dcp2	0.732105	5.56493	177.398	2.27485e-12	1.82412e-10	74.3139	66.4293	67.088	65.6024	64.7107	57.4512	37.5949	39.8007	42.884	40.4771	39.1629	38.2647
	ENSMUSG00000040747.10	Cd53	0.731667	5.40062	39.842	1.83715e-06	1.39054e-05	69.808	65.7438	58.0255	55.6414	49.7168	42.6983	32.5116	35.5983	35.016	39.2832	32.6537	30.8394
	ENSMUSG00000035372.3	1810055G02Rik	0.730572	4.31696	265.034	3.30715e-14	5.65425e-12	25.8597	27.3533	26.9917	27.3927	23.7623	25.4629	15.4946	14.2686	16.492	15.4277	15.9772	16.9102
	ENSMUSG00000079018.11	Ly6c1	0.728879	8.11967	50.7083	2.79216e-07	2.89319e-06	406.571	379.312	431.215	338.985	391.421	292.504	210.618	178.602	259.194	197.399	238.958	266.905
	ENSMUSG00000064215.14	Ifi27	0.723262	6.63264	155.678	8.68106e-12	5.48749e-10	149.411	114.349	118.855	125.368	125.3	139.727	83.508	77.6468	74.4977	75.4995	77.9492	79.2123
	ENSMUSG00000052270.8	Fpr2	0.722822	3.23097	31.7348	9.45771e-06	5.64385e-05	12.538	13.0254	17.4077	13.7742	13.7664	11.6321	6.14349	7.9406	10.7033	8.26398	7.69271	8.99709
	ENSMUSG00000046223.11	Plaur	0.717405	5.37036	86.6769	2.61629e-09	5.97976e-08	50.2827	54.638	64.1541	58.9099	61.7295	48.3015	31.5058	32.4221	37.6151	31.464	33.4606	38.9964
	ENSMUSG00000028776.15	Tinagl1	0.716737	7.00854	68.1529	2.29278e-08	3.61031e-07	147.387	146.638	195.527	180.076	168.178	137.315	94.4086	84.6101	111.144	92.1211	93.2809	117.721
	ENSMUSG00000024339.13	Tap2	0.711636	7.23947	48.8816	3.75378e-07	3.70261e-06	238.484	224.242	230.733	195.095	199.481	148.238	123.114	108.114	159.675	116.726	120.501	126.908
	ENSMUSG00000031217.9	Efnb1	0.710549	7.36118	128.832	5.81644e-11	2.64148e-09	177.361	187.976	218.541	197.196	204.391	223.492	127.382	115.566	132.858	122.11	110.684	130.133
	ENSMUSG00000038774.10	Ascc3	0.709597	4.92079	109.189	2.93949e-10	9.88913e-09	45.9727	44.8347	48.246	37.1202	40.3346	35.4637	23.4051	25.8008	26.4156	27.7651	26.3596	24.4439
	ENSMUSG00000115219.3	Eef1akmt4	0.708136	1.91413	34.6439	5.11189e-06	3.36401e-05	5.68129	5.55292	5.99815	4.66921	4.82261	4.3975	3.56105	2.71202	3.04795	2.78587	3.44289	3.55006
	ENSMUSG00000034708.13	Grn	0.706034	8.21007	150.198	1.249e-11	7.23634e-10	389.593	403.443	484.742	371.747	398.173	355.843	237.231	262.137	241.852	234.318	240.357	257.582
	ENSMUSG00000039960.6	Rhou	0.705172	4.25126	85.9995	2.81333e-09	6.36337e-08	26.3168	23.5142	27.774	21.634	23.6747	21.9875	15.3315	15.9789	14.8854	14.538	13.0453	15.1758
	ENSMUSG00000042745.10	Id1	0.704949	6.12938	64.7608	3.58001e-08	5.19399e-07	76.7301	97.4845	110.053	83.2676	99.872	92.5602	52.8993	59.2002	61.2426	53.2359	47.286	69.619
	ENSMUSG00000078578.10	Ube2d3	0.704926	7.56938	37.3036	2.99388e-06	2.11463e-05	289.027	275.658	246.446	232.215	209.214	216.541	139.452	150.016	176.545	154.159	140.648	140.62
	ENSMUSG00000029826.15	Zc3hav1	0.703677	6.78935	208.88	4.14551e-13	4.88469e-11	170.961	156.236	162.993	151.983	159.672	130.223	96.5289	99.6606	100.795	96.4521	91.9091	86.9357
	ENSMUSG00000067925.5	Rtl8a	0.703008	6.88615	133.919	3.95709e-11	1.95489e-09	151.044	131.899	159.212	139.998	138.102	143.273	89.2981	87.3221	97.9598	83.8337	81.177	90.9465
	ENSMUSG00000000555.9	Itga5	0.700684	6.31181	293.855	1.08837e-14	2.43334e-12	99.3246	101.666	101.643	108.637	114.778	100.646	64.5339	60.6662	66.8187	60.5869	62.9673	69.8629
	ENSMUSG00000053007.10	Creb5	0.698444	3.35486	40.0177	1.77741e-06	1.35001e-05	14.04	12.3398	15.9733	15.2528	17.0107	9.85891	8.04634	8.18492	11.0577	7.37437	9.33347	7.9402
	ENSMUSG00000060467.5	Gm10080	0.697268	3.50526	48.1459	4.2382e-07	4.09928e-06	12.9951	11.3115	13.4958	15.2528	17.186	15.3912	9.13369	8.9179	8.03337	8.94289	7.90789	9.72878
	ENSMUSG00000040010.11	Slc7a5	0.696519	3.66877	69.2515	1.99182e-08	3.2312e-07	18.6764	18.6468	18.3204	16.1866	17.7998	12.0577	10.7375	10.0907	9.99445	10.6753	10.6514	10.6231
	ENSMUSG00000020918.15	Kat2a	0.696405	5.27567	187.665	1.26977e-12	1.14733e-10	50.4786	48.3309	55.0265	48.0929	51.6458	46.9539	30.0922	31.5425	34.7561	28.5845	31.3088	29.1592
	ENSMUSG00000026864.14	Hspa5	0.696128	9.18448	113.694	1.98606e-10	7.20051e-09	753.195	695.211	806.686	704.039	735.931	623.026	446.762	429.598	466.313	408.493	462.343	451.778
	ENSMUSG00000026466.17	Tor1aip1	0.695255	7.54945	228.169	1.63254e-13	2.22421e-11	281.191	273.121	285.108	253.071	268.576	225.975	168.892	165.971	168.748	157.25	165.528	153.818
	ENSMUSG00000025743.15	Sdc3	0.692363	8.13838	185.661	1.41957e-12	1.2503e-10	378.687	387.607	429.063	373.537	393.525	349.105	228.043	228.714	243.057	232.07	244.983	253.626
	ENSMUSG00000034168.8	Irf2bpl	0.692059	6.82802	190.395	1.09261e-12	1.02995e-10	128.319	146.09	153.344	140.465	146.958	137.528	88.2379	87.6397	88.8159	93.0575	78.4603	91.5156
	ENSMUSG00000025355.8	Mmp19	0.69022	4.727	82.7717	4.00189e-09	8.57357e-08	40.2915	32.9747	40.4875	35.9529	29.9002	31.9882	21.7197	21.8183	19.9653	23.5278	19.9849	24.3084
	ENSMUSG00000047281.4	Sfn	0.689416	4.51346	73.5865	1.1617e-08	2.04222e-07	35.1979	31.2609	31.8163	27.704	28.7603	21.2782	19.7897	19.2529	17.0827	18.3774	16.2462	18.5091
	ENSMUSG00000052749.10	Trim30b	0.688969	3.13985	31.2257	1.05698e-05	6.18547e-05	17.2398	15.9046	13.235	11.4396	11.1359	8.79499	9.51426	9.35769	7.04101	8.00646	7.74651	6.69362
	ENSMUSG00000121069.1	ENSMUSG00000121069.1	0.688659	7.34584	51.9418	2.29597e-07	2.46083e-06	209.228	222.734	189.789	196.574	223.857	193.419	114.062	115.42	125.202	118.973	127.441	165.471
	ENSMUSG00000016534.16	Lamp2	0.688216	7.99353	60.5182	6.41084e-08	8.40591e-07	357.921	339.962	342.025	329.179	311.892	321.514	170.468	208.019	239.134	222.238	198.074	204.873
	ENSMUSG00000021411.17	Pxdc1	0.687746	7.28818	113.273	2.05896e-10	7.40334e-09	193.948	183.246	219.519	191.36	202.462	178.737	118.629	111.242	150.082	118.201	111.867	115.824
	ENSMUSG00000049482.17	Ctu2	0.686612	4.51466	207.629	4.41545e-13	5.06586e-11	28.9289	30.8495	28.6216	26.7701	30.777	27.0943	19.246	16.4676	17.7443	19.4309	16.811	17.7774
	ENSMUSG00000036052.15	Dnajb5	0.686342	5.31704	102.589	5.35256e-10	1.61493e-08	47.4747	46.0001	47.6592	52.6842	51.7335	44.4715	36.3173	31.1516	28.9437	28.3504	26.9514	28.4004
	ENSMUSG00000021493.16	Pdlim7	0.685218	5.46474	97.533	8.65948e-10	2.40574e-08	47.9318	51.6901	56.0044	53.5403	60.2388	56.4582	35.3115	33.5704	32.1571	34.0157	31.4433	36.0155
	ENSMUSG00000022754.7	Tmem45a	0.684885	3.36561	75.6007	9.1179e-09	1.6844e-07	12.9951	15.699	11.9311	11.3617	12.7142	10.2845	7.63859	7.40308	7.37179	8.26398	7.58512	8.4009
	ENSMUSG00000019139.11	Isyna1	0.68264	5.54638	105.012	4.27994e-10	1.34e-08	63.4084	55.4606	58.0907	56.9644	55.4162	52.5572	35.8008	37.7728	32.3697	39.7045	32.4116	34.9857
	ENSMUSG00000014773.14	Dll1	0.681352	5.444	29.3002	1.6256e-05	8.98535e-05	57.6618	58.7512	67.7399	60.6997	70.0594	44.0459	32.8921	34.8653	54.4851	28.1397	32.0888	41.1373
	ENSMUSG00000024640.10	Psat1	0.681333	3.64307	38.8915	2.20041e-06	1.62943e-05	17.4357	17.3443	17.2121	15.3306	15.6954	12.1995	10.0036	11.4589	9.07298	9.94955	9.22588	9.70168
	ENSMUSG00000015605.7	Srf	0.681184	5.87682	170.232	3.47964e-12	2.61473e-10	73.5956	67.869	74.716	71.0498	74.882	73.3389	45.5053	46.2998	43.711	46.2595	42.1216	47.6412
	ENSMUSG00000030110.14	Ret	0.679158	1.99459	30.2472	1.31276e-05	7.45951e-05	5.48538	4.79882	3.71624	4.74703	4.99798	5.39048	3.77852	3.02964	2.66991	3.32432	2.52837	2.84546
	ENSMUSG00000056313.6	Tcim	0.678108	5.72544	66.5195	2.83545e-08	4.29605e-07	54.7885	69.5143	60.6986	61.1666	65.6752	74.5447	40.8026	40.7047	38.1821	42.6309	39.6471	39.43
	ENSMUSG00000120144.1	ENSMUSG00000120144.1	0.677045	4.77085	29.5778	1.52624e-05	8.49414e-05	37.9406	36.471	34.4241	31.4393	32.7061	28.9384	18.4033	23.382	23.5567	22.8254	18.8821	19.2408
	ENSMUSG00000030208.16	Emp1	0.676401	7.66842	86.5695	2.64651e-09	6.04091e-08	247.691	231.029	274.741	255.172	274.1	250.799	153.669	171.712	156.792	167.012	144.144	166.121
	ENSMUSG00000032712.17	Resf1	0.675493	6.57644	151.412	1.15118e-11	6.75939e-10	131.649	132.722	110.379	131.283	124.862	115.47	81.3061	79.4793	79.0341	80.884	72.1932	74.3344
	ENSMUSG00000038213.8	Tapbpl	0.675251	5.80871	105.413	4.12621e-10	1.30253e-08	80.1258	79.5918	82.1485	64.2016	73.3914	61.9196	46.6199	44.9804	52.6658	45.1827	43.87	43.1969
	ENSMUSG00000121137.1	ENSMUSG00000121137.1	0.673683	6.34995	58.7311	8.26855e-08	1.03962e-06	100.957	108.522	103.99	96.9639	105.396	82.063	57.9282	63.818	56.0209	60.8678	57.0767	79.131
	ENSMUSG00000083396.2	Gm15542	0.673562	5.33498	55.2779	1.37444e-07	1.60219e-06	51.001	48.1253	61.481	48.2485	55.8546	45.3226	28.8146	35.525	37.9458	30.3403	29.7218	31.9505
	ENSMUSG00000014226.11	Cacybp	0.672579	4.99016	131.37	4.79181e-11	2.28943e-09	43.23	39.2817	47.3984	38.8323	38.2302	36.8822	24.6012	26.9247	28.7547	23.996	24.7189	24.0916
	ENSMUSG00000029659.17	Medag	0.669829	4.32375	75.5649	9.15687e-09	1.68981e-07	28.2105	23.9255	24.1882	23.346	22.2717	26.1722	15.8209	16.0522	14.3892	15.9193	14.6323	16.3953
	ENSMUSG00000022181.17	C6	0.668305	5.61295	42.8626	1.05428e-06	8.72186e-06	55.7681	63.8928	62.7198	56.8087	66.2013	59.579	43.6297	45.0049	31.59	43.8482	32.2502	33.1971
	ENSMUSG00000038074.17	Fkbp14	0.66738	4.14748	68.1291	2.29983e-08	3.61322e-07	18.807	20.2236	26.2093	22.4122	22.0963	19.2213	12.3957	14.2686	13.6803	14.3508	13.2605	13.1975
	ENSMUSG00000036432.9	Siah2	0.666985	3.80139	77.8791	6.97411e-09	1.35135e-07	16.7827	18.3726	21.7759	17.5874	15.6077	16.6679	11.0365	11.8009	10.3961	11.6819	10.2211	12.2219
	ENSMUSG00000046687.7	Gm5424	0.666147	3.11995	46.5406	5.54834e-07	5.1303e-06	12.538	11.4486	11.6703	10.8948	11.0482	8.65314	7.91043	7.45194	7.18277	7.09344	6.48232	5.63673
	ENSMUSG00000051439.8	Cd14	0.666038	5.37179	33.7876	6.10602e-06	3.9019e-05	58.5108	65.9494	64.0889	51.5169	55.5039	44.4005	31.2883	38.8478	30.6922	34.8585	35.2628	43.495
	ENSMUSG00000037075.8	Rnf139	0.664784	5.55462	64.9616	3.48514e-08	5.07747e-07	63.6696	65.4696	64.0889	60.155	63.1324	52.4153	34.0339	37.9683	43.7582	40.5707	37.4684	38.8609
	ENSMUSG00000000275.17	Trim25	0.661938	7.22715	178.242	2.16593e-12	1.77332e-10	213.081	227.053	227.212	212.06	219.736	182	128.008	133.769	144.813	130.632	127.172	145.308
	ENSMUSG00000022216.18	Psme1	0.661642	7.20055	108.332	3.1718e-10	1.04928e-08	218.762	219.786	228.973	191.282	207.986	167.389	137.332	132.669	130.944	120.097	128.866	130.404
	ENSMUSG00000041736.8	Tspo	0.661535	6.90686	111.221	2.45903e-10	8.52546e-09	178.471	165.354	184.704	155.952	146.783	142.706	109.631	106.502	98.3378	100.549	90.9139	110.052
	ENSMUSG00000038467.16	Chmp4b	0.660648	7.37288	208.688	4.18578e-13	4.89905e-11	236.786	240.421	247.163	213.694	221.49	192.568	143.529	142.247	141.056	142.314	137.285	149.021
	ENSMUSG00000026819.16	Slc25a25	0.660105	5.15905	67.721	2.42433e-08	3.76138e-07	51.001	46.2057	52.6142	40.6999	44.8065	37.3078	28.57	30.4186	26.1084	28.9356	25.6334	33.0345
	ENSMUSG00000064337.1	mt-Rnr1	0.659051	7.14202	46.8791	5.23921e-07	4.88853e-06	220.068	201.687	183.139	172.138	179.401	160.651	116.808	114.907	125.368	112.933	131.126	106.447
	ENSMUSG00000034675.18	Dbn1	0.658539	3.94589	53.6477	1.76111e-07	1.97377e-06	18.9376	16.2474	18.6464	18.2877	19.3781	22.3421	12.9122	11.8987	10.5379	12.4077	11.9156	12.4387
	ENSMUSG00000031712.11	Il15	0.657674	2.4885	35.3763	4.40062e-06	2.95388e-05	8.8811	7.19822	8.93202	6.69253	7.27776	6.87996	4.43093	4.69106	5.22169	5.12694	5.11054	4.52564
	ENSMUSG00000055994.16	Nod2	0.657275	3.37981	31.0134	1.10747e-05	6.43345e-05	16.9786	11.7228	15.2562	14.4745	12.5388	8.93685	7.55704	7.35421	11.2231	7.32755	8.90311	8.3467
	ENSMUSG00000023249.16	Parp3	0.656162	6.46881	128.046	6.18023e-11	2.7682e-09	129.037	125.043	141.217	114.863	120.828	101.781	78.9412	77.5247	74.8521	72.2688	74.9098	86.6647
	ENSMUSG00000042842.12	Serpinb6b	0.656021	7.14235	150.517	1.22248e-11	7.10628e-10	189.18	178.585	204.785	169.103	174.491	171.219	107.565	117.399	120.335	116.234	108.263	120.377
	ENSMUSG00000043702.10	Pde12	0.652812	4.15614	115.424	1.71444e-10	6.41591e-09	24.0965	22.8287	23.6666	22.2566	22.7978	20.7817	13.7549	14.9772	16.0431	13.8357	14.175	13.9834
	ENSMUSG00000025408.16	ENSMUSG00000025408.16	0.651725	4.39858	50.9903	2.66924e-07	2.78735e-06	27.7534	30.5753	29.3388	26.1476	25.516	20.4271	18.4033	17.8602	18.5476	15.9193	15.4392	15.5823
	ENSMUSG00000018171.10	Vmp1	0.651549	6.64548	104.088	4.65845e-10	1.44536e-08	136.939	139.92	140.5	125.835	138.277	113.838	78.9683	78.1843	84.6339	80.3221	92.4202	91.8137
	ENSMUSG00000047714.15	Ppp1r2	0.649628	7.63076	81.3071	4.71274e-09	9.74917e-08	266.629	273.464	264.114	242.021	248.935	221.79	145.922	155.123	187.721	162.564	160.955	154.712
	ENSMUSG00000009772.16	Nuak2	0.649415	4.53824	86.2782	2.73038e-09	6.19988e-08	35.3285	31.5351	35.2717	31.7506	33.3199	25.4629	20.3061	19.9126	21.0758	20.8823	19.3394	21.3274
	ENSMUSG00000068566.14	Myadm	0.648175	8.50563	126.736	6.84219e-11	2.99574e-09	431.843	408.037	473.006	457.193	451.572	440.814	267.296	293.24	274.174	308.225	258.701	297.175
	ENSMUSG00000055148.8	Klf2	0.648146	7.20534	34.7928	4.95778e-06	3.27123e-05	175.271	156.03	240.187	169.804	212.107	174.623	114.443	124.948	99.3538	108.509	121.954	150.62
	ENSMUSG00000073676.5	Hspe1	0.647735	4.92643	171.534	3.21726e-12	2.47634e-10	42.1852	36.6081	38.8576	38.3653	36.6519	35.3928	24.4381	23.8951	25.2815	23.7619	24.423	23.8206
	ENSMUSG00000038866.16	Zcchc2	0.647531	5.50389	152.069	1.10168e-11	6.49062e-10	64.7798	65.6752	68.3919	63.0343	65.8506	54.7559	39.824	40.0206	46.1446	41.1092	39.8622	37.1536
	ENSMUSG00000030782.18	Tgfb1i1	0.647038	6.90805	87.5855	2.37517e-09	5.54493e-08	140.073	158.909	155.039	150.582	149.939	141.145	111.697	101.517	81.326	103.148	82.6563	91.624
	ENSMUSG00000028063.16	Lmna	0.646118	7.2661	98.5228	7.86873e-10	2.24955e-08	185.719	172.346	214.173	196.418	188.696	176.467	129.312	129.786	111.593	134.214	99.3597	120.214
	ENSMUSG00000024259.10	Slc25a46	0.646027	5.24522	61.262	5.77596e-08	7.70083e-07	49.8909	48.8794	45.5729	47.0034	40.51	47.9469	26.5584	30.0032	35.2287	31.8854	28.1887	26.9913
	ENSMUSG00000029661.17	Col1a2	0.645755	8.77777	31.1316	1.07904e-05	6.29131e-05	417.869	422.707	535.074	568.398	550.041	686.01	309.784	374.723	290.666	360.384	310.64	386.197
	ENSMUSG00000070284.11	Gmppb	0.642564	4.33311	129.85	5.37918e-11	2.47513e-09	27.9493	27.4218	28.6216	27.7818	27.0943	21.2073	16.1471	16.8096	17.1063	17.9326	16.811	17.7232
	ENSMUSG00000016520.8	Lnx2	0.642084	5.77818	138.556	2.81563e-11	1.45702e-09	59.3597	65.4696	68.3919	71.6724	68.9195	72.9133	42.7598	46.2265	41.4427	45.089	41.0188	43.9557
	ENSMUSG00000036381.14	P2ry14	0.641671	4.03005	62.822	4.6552e-08	6.44714e-07	19.3948	24.8167	22.9494	19.2216	22.7101	20.9236	12.7491	13.1692	14.4364	14.5849	13.933	14.4441
	ENSMUSG00000024737.3	Slc15a3	0.641192	5.02798	65.3451	3.31142e-08	4.86503e-07	52.503	49.4964	49.2239	40.0774	44.1927	35.18	27.5913	27.6821	27.7151	29.1697	28.6459	32.9261
	ENSMUSG00000041889.8	Shisa4	0.640992	2.554	37.7193	2.75982e-06	1.97491e-05	5.9425	6.7869	8.14966	8.32676	7.19008	7.23459	4.21346	4.78879	4.27659	4.26075	5.13744	5.28443
	ENSMUSG00000074345.5	Tnfaip8l3	0.640487	2.47585	30.897	1.13626e-05	6.57878e-05	7.11794	7.60955	9.5188	7.85984	7.54081	4.3975	4.40374	4.61776	4.65463	4.72896	5.02985	4.82374
	ENSMUSG00000002983.18	Relb	0.640251	5.04245	80.0738	5.41813e-09	1.09486e-07	51.654	44.5604	46.0293	38.4432	41.2991	35.6765	27.7544	27.1202	27.5025	26.3604	29.6949	27.0726
	ENSMUSG00000051790.16	Nlgn2	0.636899	6.22063	117.487	1.44196e-10	5.60051e-09	96.7125	103.243	99.491	92.7616	93.6464	92.773	66.192	62.5719	63.4163	61.5936	56.8346	61.5704
	ENSMUSG00000024810.17	Il33	0.63548	6.54685	87.8689	2.30498e-09	5.41004e-08	132.302	113.801	120.159	113.228	109.429	115.683	70.7861	78.2088	83.8542	73.4628	72.6235	74.7409
	ENSMUSG00000024349.11	Sting1	0.633864	5.01308	48.0526	4.30438e-07	4.15407e-06	50.0215	47.9196	46.616	41.2447	38.844	30.4278	28.6787	28.3418	23.344	28.3269	27.6507	28.2649
	ENSMUSG00000018569.13	Cldn7	0.632614	5.25748	71.5752	1.48724e-08	2.51075e-07	54.3314	49.8391	53.1358	51.5948	46.1217	41.8472	34.061	36.991	31.6845	34.086	26.6017	28.1024
	ENSMUSG00000037722.9	Gnpnat1	0.631994	3.91791	35.6872	4.13186e-06	2.80195e-05	22.268	20.2236	18.5812	18.4434	15.4324	19.6469	12.0423	13.6334	13.1605	12.7822	10.9204	11.5174
	ENSMUSG00000046791.9	Riox1	0.631161	4.46201	60.8993	6.07655e-08	8.05847e-07	23.8353	31.8779	29.2736	23.9686	29.3741	28.1582	19.6537	20.6944	18.1223	17.0196	15.7351	16.2327
	ENSMUSG00000028035.14	Dnajb4	0.630985	6.25431	110.019	2.73174e-10	9.28631e-09	98.6716	99.4041	94.4056	90.5827	94.9617	91.3545	55.2099	61.0082	63.44	62.5534	57.776	67.695
	ENSMUSG00000033863.3	Klf9	0.629019	7.58731	56.7091	1.11041e-07	1.33732e-06	210.534	212.725	243.838	258.752	255.686	260.871	133.553	138.508	168.748	154.23	163.591	173.871
	ENSMUSG00000027230.10	Creb3l1	0.628863	5.12403	50.4804	2.89596e-07	2.97487e-06	42.1852	40.7899	38.2708	40.8556	36.9149	40.6414	31.0165	28.635	22.966	27.8587	21.0339	23.5225
	ENSMUSG00000028719.9	Cmpk1	0.627037	5.46793	35.8989	3.9591e-06	2.69909e-05	60.5351	56.9688	50.5931	58.5208	51.6458	51.777	30.0379	36.3313	41.6081	38.4872	33.4606	33.712
	ENSMUSG00000021824.14	Ap3m1	0.626693	6.52104	91.2103	1.62767e-09	4.04921e-08	118.262	132.447	120.354	105.446	97.4168	103.128	67.2794	72.0762	77.9945	76.9042	71.7628	72.7084
	ENSMUSG00000038400.16	Pmepa1	0.625498	6.13901	58.8283	8.15379e-08	1.02816e-06	74.6404	85.6932	88.2119	83.1897	86.2809	92.1347	56.3788	54.7046	53.1384	46.915	52.5579	67.0175
	ENSMUSG00000003814.9	Calr	0.624318	9.18793	126.714	6.85418e-11	2.99574e-09	734.062	681.432	693.112	669.72	684.636	677.853	462.474	444.698	452.397	441.362	448.517	436.847
	ENSMUSG00000112627.3	4933412E12Rik	0.623894	3.20071	35.7005	4.12076e-06	2.79727e-05	12.4074	11.8599	14.213	10.5057	11.2235	10.0008	8.23663	7.15875	7.53719	8.02987	6.40163	8.2654
	ENSMUSG00000042812.6	Foxf1	0.622727	8.05678	79.3953	5.85454e-09	1.16417e-07	302.937	344.007	350.044	327.234	356.698	349.885	217.442	231.377	230.298	185.506	190.973	263.246
	ENSMUSG00000021922.18	Itih4	0.622418	6.61314	38.5151	2.36527e-06	1.73238e-05	119.111	125.66	142.978	112.217	116.269	130.79	61.7883	88.2994	68.9688	89.6864	79.59	97.071
	ENSMUSG00000117438.2	Rpsa-ps7	0.618274	2.71231	38.8548	2.21595e-06	1.63885e-05	9.0117	8.43221	6.78051	7.00381	8.24229	7.09274	5.21925	5.6928	4.56012	5.31423	4.35741	5.17604
	ENSMUSG00000028261.14	Ndufaf4	0.617042	3.78717	45.5934	6.5237e-07	5.82821e-06	18.7417	17.2072	16.1689	17.1983	17.7121	15.3912	9.29679	10.4572	13.6803	10.6987	12.4267	10.1624
	ENSMUSG00000041801.6	Phlda3	0.61655	5.66077	61.5805	5.5253e-08	7.41768e-07	74.5098	54.1581	55.4829	59.4546	57.6083	65.1113	41.6453	39.7274	35.843	39.1895	40.1312	42.5465
	ENSMUSG00000029817.12	Tra2a	0.616283	6.39835	67.9715	2.34705e-08	3.6643e-07	107.683	114.76	120.354	97.1974	107.15	90.858	64.561	71.2943	83.8305	70.5364	62.241	63.7384
	ENSMUSG00000028893.9	Sesn2	0.615878	4.56285	130.878	4.97373e-11	2.33164e-09	25.3372	28.3816	32.1422	29.2604	28.3219	29.0093	19.7625	19.5949	18.5713	17.9326	17.1338	19.5389
	ENSMUSG00000074406.6	Zfp628	0.615571	4.47954	87.1429	2.48946e-09	5.75017e-08	23.3129	26.9419	30.2515	27.4705	29.6372	29.0093	17.7237	17.6403	17.0591	17.2303	17.7255	21.3274
	ENSMUSG00000071847.14	Apcdd1	0.615154	4.12385	50.8866	2.71371e-07	2.82534e-06	21.615	17.1386	20.7327	23.346	22.8855	25.6048	13.7277	13.1936	15.1216	13.906	15.2509	14.4441
	ENSMUSG00000072941.6	Sod3	0.614588	9.00252	87.3475	2.4359e-09	5.66396e-08	577.794	634.198	679.095	604.04	576.083	659.979	390.628	387.477	390.374	409.149	417.505	441.887
	ENSMUSG00000039285.13	Azi2	0.613434	6.13321	168.273	3.91912e-12	2.896e-10	99.6511	96.799	91.2761	87.7811	93.7341	81.9211	58.934	62.3764	64.1015	60.5401	59.094	55.202
	ENSMUSG00000024732.8	Ccdc86	0.612486	4.01529	90.8308	1.6924e-09	4.16862e-08	22.5293	21.7318	23.2754	18.599	21.3949	18.4411	13.4831	14.7329	13.0188	13.8123	14.2557	13.1433
	ENSMUSG00000044231.4	Nhlrc1	0.611616	2.68151	40.204	1.7164e-06	1.31227e-05	7.18324	8.02088	6.78051	8.17112	8.94376	7.16366	4.62121	5.03312	6.28493	4.70555	5.43332	4.09205
	ENSMUSG00000039903.19	Eva1c	0.610746	3.68141	61.8114	5.3509e-08	7.21689e-07	14.8236	16.0418	16.9513	15.4084	17.0984	15.3203	11.4715	10.9458	10.1126	10.3007	9.87142	9.89138
	ENSMUSG00000028796.18	Phc2	0.610494	7.11996	192.56	9.71261e-13	9.25564e-11	162.929	166.793	186.725	168.714	179.489	168.098	119.717	113.123	117.689	111.833	101.108	112.897
	ENSMUSG00000120926.1	ENSMUSG00000120926.1	0.610259	2.70958	50.0929	3.08229e-07	3.12694e-06	7.90156	6.44412	8.14966	8.01548	7.89155	7.87294	5.00178	5.35074	5.26894	4.91625	4.4919	5.25733
	ENSMUSG00000042821.8	Snai1	0.608574	4.68328	40.9235	1.50121e-06	1.17555e-05	27.1657	36.3339	37.0972	30.8168	29.7248	33.6905	21.176	22.5269	19.5872	24.5578	20.4422	19.5389
	ENSMUSG00000042784.10	Muc1	0.608095	8.4207	97.7229	8.5013e-10	2.38351e-08	392.009	417.977	474.766	418.517	453.063	453.297	267.378	334.116	261.628	304.105	255.312	289.451
	ENSMUSG00000024146.10	Cript	0.607975	4.98849	41.7361	1.29286e-06	1.03803e-05	42.7076	39.4188	38.988	37.1202	35.6873	38.7973	20.3877	24.286	29.5108	27.1798	25.2837	26.097
	ENSMUSG00000067931.7	Zfp948	0.607708	3.98769	35.5331	4.26277e-06	2.87799e-05	20.962	21.8003	20.9283	20.9336	17.7998	16.0296	11.0637	14.1709	14.4837	13.1802	13.0991	11.7613
	ENSMUSG00000094388.2	Gm8783	0.606454	1.79068	37.8895	2.66978e-06	1.91993e-05	4.63646	4.18183	5.21578	3.73537	4.82261	3.47544	2.9902	3.10294	2.90619	2.69223	2.74356	2.68287
	ENSMUSG00000096592.2	Gm15801	0.606454	1.79068	37.8895	2.66978e-06	1.91993e-05	4.63646	4.18183	5.21578	3.73537	4.82261	3.47544	2.9902	3.10294	2.90619	2.69223	2.74356	2.68287
	ENSMUSG00000028351.6	Brinp1	0.603929	1.90724	37.6506	2.79708e-06	1.99829e-05	4.04874	4.59315	5.34617	4.74703	3.85809	5.31955	2.85428	3.20067	3.07158	3.20727	3.01253	3.03516
	ENSMUSG00000026761.13	Orc4	0.603794	4.43592	33.102	7.0537e-06	4.39948e-05	29.6472	30.3011	23.797	28.4822	24.5515	24.3281	16.2286	18.1779	19.54	18.4008	17.08	16.585
	ENSMUSG00000068758.9	Il3ra	0.603561	4.14054	65.0282	3.45426e-08	5.04542e-07	24.0965	24.4054	25.4269	20.778	20.4303	19.6469	14.8966	13.6823	14.7436	14.3742	14.4709	16.6934
	ENSMUSG00000043091.10	Tuba1c	0.603216	5.98916	63.7536	4.10027e-08	5.81966e-07	86.8519	80.5516	80.3882	75.4077	77.7756	62.2742	48.3596	57.5876	48.6255	49.3498	45.5376	55.5543
	ENSMUSG00000006445.4	Epha2	0.601291	6.5213	139.307	2.66726e-11	1.38849e-09	116.956	109.344	120.224	121.633	127.054	107.881	79.3761	79.8946	77.7819	78.9877	65.3881	81.8681
	ENSMUSG00000024966.10	Stip1	0.601009	6.2497	59.8575	7.03869e-08	9.12622e-07	94.7535	79.3176	99.165	87.392	97.9429	77.9492	60.6194	61.2281	62.4712	55.5302	60.412	53.3863
	ENSMUSG00000059013.13	Sh2d3c	0.600812	6.99553	131.414	4.77578e-11	2.28943e-09	135.894	147.118	172.251	173.072	166.249	157.246	109.278	101.786	112.373	102.703	97.9342	103.385
	ENSMUSG00000028982.10	Slc25a33	0.600611	2.91331	51.3827	2.50787e-07	2.65381e-06	9.14231	8.50076	9.25801	8.24894	9.20681	10.4263	6.14349	5.6195	5.00904	5.57175	6.85889	6.96461
	ENSMUSG00000022591.6	Gm9747	0.599821	4.27888	40.6833	1.56959e-06	1.22088e-05	22.7905	22.8287	21.1891	20.9336	26.3052	24.3281	15.7121	16.8585	14.8381	16.3173	12.5612	14.8777
	ENSMUSG00000023944.15	Hsp90ab1	0.599775	10.2531	119.944	1.17741e-10	4.7202e-09	1399.75	1320.91	1549.87	1422.79	1523.68	1393.44	967.328	951.357	944.747	928.258	976.733	913.177
	ENSMUSG00000020407.14	Upp1	0.598377	3.45023	33.741	6.16576e-06	3.93207e-05	15.4766	13.7795	12.7135	13.852	13.328	10.9228	8.97059	8.67357	10.3725	7.95964	7.69271	9.21389
	ENSMUSG00000037216.6	Lipt1	0.598166	2.23276	44.9101	7.34256e-07	6.44099e-06	6.98733	6.92401	7.1065	5.75869	6.13787	5.10677	4.59403	4.52003	3.80404	4.00323	4.30362	3.92945
	ENSMUSG00000022951.18	ENSMUSG00000022951.18	0.598148	5.75745	104.232	4.59733e-10	1.42911e-08	75.0975	68.7602	68.5875	67.2366	64.0969	60.8557	43.1947	50.6488	43.0494	42.9118	41.3954	46.2049
	ENSMUSG00000024777.11	Ppp2r5b	0.597559	5.6174	92.7051	1.3977e-09	3.62241e-08	57.9883	54.9807	64.1541	55.3301	61.1157	55.1106	36.9697	38.7012	45.6012	34.8819	36.0697	38.1563
	ENSMUSG00000054404.14	Slfn5	0.595864	7.683	66.1794	2.96514e-08	4.45767e-07	333.629	298.281	295.865	293.149	286.551	225.62	181.45	174.669	210.332	194.262	187.53	198.505
	ENSMUSG00000032501.10	Trib1	0.595221	5.7656	134.624	3.75509e-11	1.871e-09	80.7788	70.1998	74.5205	69.649	72.6899	64.7567	50.0178	44.3207	45.5539	47.3833	46.6942	52.492
	ENSMUSG00000032135.16	Mcam	0.594806	8.21535	75.5485	9.17469e-09	1.69131e-07	317.565	329.953	355.129	371.825	401.154	343.288	241.988	237.094	230.439	236.495	207.892	248.856
	ENSMUSG00000027358.7	Bmp2	0.594407	2.70114	41.5521	1.33712e-06	1.06865e-05	6.72613	8.50076	8.34525	8.0933	8.1546	9.14963	5.27362	4.52003	5.03267	5.6888	5.32572	6.58522
	ENSMUSG00000042246.6	Tmc7	0.594196	1.70873	30.4359	1.25863e-05	7.18472e-05	3.13451	3.7705	4.88979	4.20229	4.73493	4.75213	2.74554	2.80975	2.52815	2.90293	2.74356	3.11646
	ENSMUSG00000038344.15	Txlng	0.592924	4.84554	36.2671	3.67704e-06	2.53554e-05	36.3733	37.9107	36.7712	34.3965	32.2677	36.102	21.0673	22.9422	29.6289	24.0662	21.2222	22.8721
	ENSMUSG00000033287.18	Kctd17	0.592899	4.995	139.897	2.5565e-11	1.33882e-09	36.2427	35.0314	35.5977	39.7661	39.7208	40.4995	24.0303	24.5303	25.7304	24.4876	26.0907	25.4195
	ENSMUSG00000053846.6	Lipg	0.592613	6.53898	130.671	5.05292e-11	2.35752e-09	99.7164	111.812	112.009	106.38	115.304	114.264	75.1898	63.8913	71.497	75.0781	75.2057	76.421
	ENSMUSG00000060950.13	Trmt61a	0.592467	2.95523	40.4528	1.63842e-06	1.26539e-05	10.5137	9.66619	10.1056	8.79368	8.94376	8.51128	6.27941	6.18145	6.78111	6.06337	6.37473	5.85353
	ENSMUSG00000004846.11	Plod3	0.589551	6.53537	117.754	1.4104e-10	5.52717e-09	121.527	118.257	125.831	110.738	113.2	104.263	74.8636	78.0377	82.2711	78.6365	70.2834	77.0443
	ENSMUSG00000040511.15	Pvr	0.589043	5.44924	84.7463	3.22172e-09	7.1299e-08	50.4133	58.7512	60.3727	51.5169	57.1699	48.0888	33.5717	32.984	38.5365	36.2632	35.6393	39.9178
	ENSMUSG00000028108.17	Ecm1	0.588203	7.17458	145.752	1.69228e-11	9.19589e-10	172.267	169.124	180.336	171.593	174.842	161.218	111.996	112.561	108.403	114.759	109.527	127.477
	ENSMUSG00000063229.16	Ldha	0.587554	7.84095	117.372	1.45589e-10	5.64207e-09	328.601	271.819	281.065	264.822	275.503	279.312	192.813	197.122	181.483	184.032	179.864	196.852
	ENSMUSG00000042406.9	Atf4	0.587453	7.55983	106.386	3.77727e-10	1.21535e-08	252.785	248.304	265.027	239.375	245.34	195.263	173.078	163.772	158.234	154.066	158.077	155.227
	ENSMUSG00000022094.16	Slc39a14	0.58718	5.03304	81.9604	4.38003e-09	9.21391e-08	47.9971	42.8466	42.5738	40.7778	36.5642	36.3148	28.7602	26.2406	27.0299	25.6815	27.6507	29.3218
	ENSMUSG00000018899.18	Irf1	0.586398	7.41314	30.1132	1.35275e-05	7.6618e-05	241.03	246.522	249.314	224.433	217.105	158.665	143.828	127.905	202.157	132.973	142.369	141.325
	ENSMUSG00000022146.13	Osmr	0.586326	6.52781	123.019	9.18009e-11	3.81171e-09	129.951	124.632	127.721	115.952	118.373	105.895	75.0539	76.9627	89.0995	77.3724	82.2529	80.5673
	ENSMUSG00000024736.16	Tmem132a	0.585324	4.92149	47.2708	4.90469e-07	4.63593e-06	35.3938	38.939	38.7924	34.7078	34.1967	38.3008	22.2362	26.7293	27.1717	22.7084	23.2395	24.8233
	ENSMUSG00000034165.17	Ccnd3	0.585114	7.44669	186.499	1.35473e-12	1.21779e-10	215.628	204.635	222.779	204.044	202.988	199.235	139.18	146.278	138.268	139.645	127.387	142.084
	ENSMUSG00000017057.10	Il13ra1	0.584971	5.73168	65.6317	3.18777e-08	4.71115e-07	70.657	68.1432	68.9135	66.5362	67.8673	57.664	37.7308	44.1497	52.0751	47.0087	43.6279	41.8419
	ENSMUSG00000044813.16	Shb	0.584641	5.07434	103.114	5.09745e-10	1.54929e-08	38.463	41.4069	46.1597	41.0112	44.8065	35.3928	28.7059	26.4605	27.8333	27.133	24.1271	30.5413
	ENSMUSG00000022858.17	Tra2b	0.58325	6.26193	57.3446	1.0113e-07	1.23243e-06	102.263	100.295	98.839	87.7811	92.5942	85.5384	56.5419	65.1373	70.67	66.6503	58.2602	61.4349
	ENSMUSG00000033585.6	Ndn	0.581775	3.80893	42.3761	1.15086e-06	9.41804e-06	16.2602	15.3562	16.0385	15.7197	16.3092	17.9446	11.3356	11.0435	9.9472	11.4244	9.30657	12.1677
	ENSMUSG00000024427.8	Spry4	0.579478	5.13407	43.7437	9.01034e-07	7.63515e-06	40.3568	45.7259	42.7042	36.4977	46.034	44.8261	28.7874	28.464	26.1793	28.2099	26.279	33.4952
	ENSMUSG00000032643.13	Fhl3	0.579274	2.13985	35.1238	4.63284e-06	3.08721e-05	6.33431	4.93593	5.73736	5.36959	5.69945	5.10677	3.77852	4.20241	3.54413	3.16044	4.14223	3.38746
	ENSMUSG00000023988.9	Bysl	0.578198	4.49099	96.9052	9.2055e-10	2.52017e-08	27.9493	25.8451	24.5142	26.5367	29.9002	26.5978	18.4848	16.9074	19.5872	16.5982	18.8014	17.5877
	ENSMUSG00000032012.10	Nectin1	0.578074	5.61567	112.938	2.11926e-10	7.55784e-09	55.5722	57.0374	55.9392	57.7426	58.6605	61.0685	38.2473	38.2615	40.7575	39.8216	36.4462	38.1563
	ENSMUSG00000037126.17	Psd	0.578033	2.77094	40.7223	1.55826e-06	1.21261e-05	9.077	8.50076	8.86683	9.2606	7.45313	6.87996	6.08912	5.6195	6.35581	4.63532	5.19124	5.66383
	ENSMUSG00000035397.9	Klf16	0.576706	4.49983	53.5688	1.78261e-07	1.99275e-06	22.8558	26.7363	31.2295	27.704	27.0066	31.1371	19.1644	20.4501	21.9736	17.0196	17.4565	15.6365
	ENSMUSG00000006442.11	Srm	0.576226	3.81048	42.1036	1.20914e-06	9.85338e-06	17.2398	15.4933	18.7116	19.1438	16.6599	14.611	10.0579	10.1395	13.1369	10.488	12.5881	11.8968
	ENSMUSG00000021266.17	Wars1	0.575152	7.54301	30.3604	1.27999e-05	7.28755e-05	268.719	252.555	233.667	208.714	204.128	197.32	167.233	148.746	195.636	134.799	133.735	136.338
	ENSMUSG00000040774.16	Cept1	0.574916	5.83305	44.9897	7.24163e-07	6.36206e-06	73.7262	78.8377	68.9135	70.1938	63.6585	63.1963	43.2219	45.3225	53.5164	48.4602	45.5914	44.9312
	ENSMUSG00000002728.15	Naa20	0.574823	4.94797	104.048	4.67563e-10	1.44572e-08	36.1121	39.6931	45.5729	34.63	39.8962	37.5206	24.4924	24.0905	26.8409	26.1029	26.6555	28.5901
	ENSMUSG00000030088.16	Aldh1l1	0.572925	4.78517	30.3421	1.28524e-05	7.31504e-05	41.2057	27.2847	30.3819	32.9957	32.5307	37.5206	25.8788	25.019	16.8228	22.2168	21.5719	24.3355
	ENSMUSG00000038539.16	Atf5	0.572822	6.84346	48.4066	4.05918e-07	3.95906e-06	144.906	152.877	153.083	117.197	112.937	127.811	86.0361	79.8213	100.89	83.9508	94.1954	99.2661
	ENSMUSG00000030042.16	Pole4	0.572754	4.31968	85.1916	3.06969e-09	6.83683e-08	24.8148	24.2683	25.5573	23.9686	24.2008	24.3281	15.1141	17.1028	18.713	16.528	16.9455	14.4983
	ENSMUSG00000007476.19	Lrrc8a	0.572148	6.24547	101.408	5.97846e-10	1.76929e-08	79.0156	90.2177	89.7766	98.5981	102.941	93.8369	62.7669	59.0047	65.7318	58.0585	61.0844	65.9877
	ENSMUSG00000001774.9	Chordc1	0.571382	5.17527	107.369	3.45707e-10	1.12268e-08	42.5117	44.4919	44.4645	43.8127	44.9818	41.6344	27.6457	29.6367	35.3232	27.3437	28.5921	27.6146
	ENSMUSG00000039646.6	Vasn	0.570477	6.06326	84.7207	3.23074e-09	7.13948e-08	68.8285	77.8779	90.0374	87.4699	91.8927	86.6023	52.274	56.0973	55.2412	57.4499	52.6655	64.5785
	ENSMUSG00000025491.15	Ifitm1	0.570131	5.73289	33.6222	6.32126e-06	4.01444e-05	77.8402	72.5992	65.6536	75.3299	76.285	63.7637	47.1907	40.9246	46.4754	46.5873	56.6463	52.763
	ENSMUSG00000106874.3	Gm20186	0.570022	7.07835	44.0796	8.4913e-07	7.2695e-06	191.074	202.03	170.556	157.741	158.796	146.678	103.76	120.624	103.772	110.639	109.339	143.818
	ENSMUSG00000028458.13	Tesk1	0.56839	5.79202	215.907	2.92656e-13	3.56897e-11	61.1882	68.8973	65.5232	70.116	64.0969	69.7216	45.6956	45.5179	46.1919	45.9786	41.1264	44.877
	ENSMUSG00000024247.15	Pkdcc	0.568217	3.3553	31.752	9.42254e-06	5.62739e-05	12.8645	9.73474	13.6914	13.2294	11.5743	13.0506	7.52986	7.59854	8.38778	8.02987	9.22588	9.26808
	ENSMUSG00000037731.6	Themis2	0.567448	5.32684	43.2042	9.91745e-07	8.27514e-06	65.1716	59.5739	57.8952	52.6842	51.1197	38.8682	39.2531	37.2353	39.4107	35.5609	35.6124	32.628
	ENSMUSG00000025225.16	Nfkb2	0.567045	5.83023	80.7224	5.03388e-09	1.03399e-07	82.1502	73.8332	72.6949	69.5712	63.8339	60.9266	48.1693	49.9891	50.4448	45.6743	49.0074	42.4381
	ENSMUSG00000049969.4	Plekhf2	0.566851	5.65334	99.4745	7.18188e-10	2.0909e-08	66.5429	60.6022	67.6095	59.299	62.2556	61.3522	41.156	45.6645	45.672	44.2228	37.307	40.9476
	ENSMUSG00000028793.16	Rnf19b	0.566572	5.62816	65.1326	3.4065e-08	4.98791e-07	65.8246	70.474	69.8914	58.1317	62.8693	54.685	44.1462	44.1008	44.0181	44.4569	42.3906	38.8338
	ENSMUSG00000026893.5	Gca	0.565359	3.83983	36.2969	3.65522e-06	2.52249e-05	21.3538	18.1669	20.7327	15.8753	18.1506	15.5331	10.9278	12.7294	14.7436	12.8759	11.8349	11.138
	ENSMUSG00000032997.17	Chpf	0.56462	5.88436	73.4008	1.18824e-08	2.08049e-07	70.9835	72.1879	74.7812	65.0577	63.3955	71.2111	50.9692	51.1863	46.1682	49.3732	39.9967	44.8228
	ENSMUSG00000118057.2	B020010K11Rik	0.56436	3.67093	42.449	1.1358e-06	9.31227e-06	14.693	13.6423	15.7125	12.4512	17.7121	15.0366	10.4657	10.8725	10.467	10.2539	9.0107	9.18679
	ENSMUSG00000032578.8	Cish	0.563445	6.1911	68.6284	2.15685e-08	3.435e-07	90.1823	94.4681	90.8198	88.6372	95.7508	84.4745	67.524	64.5265	65.2357	56.0686	55.0594	59.8632
	ENSMUSG00000115018.3	ENSMUSG00000115018.3	0.562913	3.53287	31.8956	9.13359e-06	5.47351e-05	11.885	15.2191	14.213	13.6963	13.591	10.8519	9.86764	7.8673	8.97847	8.61514	10.3825	8.0757
	ENSMUSG00000030878.12	Cdr2	0.562681	5.26409	105.435	4.11779e-10	1.30253e-08	44.4055	45.863	46.3552	45.9139	48.1385	43.4785	27.102	31.005	35.6303	28.3738	30.5019	32.899
	ENSMUSG00000015733.14	Capza2	0.562135	7.07106	69.7449	1.87085e-08	3.06665e-07	181.344	176.391	180.14	161.632	159.059	154.834	103.406	114.809	122.367	118.926	109.796	117.179
	ENSMUSG00000041571.11	Selenow	0.561118	6.90389	138.222	2.88463e-11	1.48832e-09	157.313	163.16	172.903	143.423	148.975	138.592	109.468	106.942	96.6839	104.529	99.8439	109.212
	ENSMUSG00000067121.3	Gm7027	0.561028	2.88819	40.9518	1.49337e-06	1.17152e-05	8.35868	9.25486	8.28005	8.56022	9.20681	10.0717	5.32798	7.28092	5.93051	6.48476	5.48711	5.85353
	ENSMUSG00000031422.17	Morf4l2	0.560781	7.11329	142.501	2.12406e-11	1.11908e-09	172.071	161.583	174.533	171.671	168.528	159.303	111.317	114.296	122.745	116.983	106.138	111.624
	ENSMUSG00000070462.5	Tlnrd1	0.558778	6.169	46.1043	5.97638e-07	5.45094e-06	76.3383	91.3832	94.0144	82.645	84.4396	87.879	57.1671	64.0623	65.5664	57.8947	49.2226	56.828
	ENSMUSG00000101188.2	Eif4a-ps4	0.558512	6.41094	132.533	4.38941e-11	2.14417e-09	105.332	99.7468	109.336	101.322	110.657	91.4254	72.254	72.125	72.9855	68.0783	65.2536	68.7247
	ENSMUSG00000095687.3	Rnaset2a	0.557501	5.02553	63.6616	4.15173e-08	5.88156e-07	39.4425	40.3786	46.8116	40.3108	38.9316	38.3717	25.3895	26.1429	27.3843	30.4105	28.5653	28.1294
	ENSMUSG00000020869.9	Lrrc59	0.557333	6.7446	137.02	3.14822e-11	1.60064e-09	135.176	132.996	137.436	132.139	128.457	125.967	87.4768	90.9381	91.8403	79.3623	91.0484	97.7485
	ENSMUSG00000014551.9	Mrps25	0.55537	5.88604	108.315	3.17662e-10	1.04928e-08	67.0653	69.6514	67.7399	68.4039	68.3058	73.7645	43.7384	48.1811	52.146	43.7312	46.6942	47.8309
	ENSMUSG00000021696.10	Elovl7	0.555363	3.06382	34.4966	5.2696e-06	3.44957e-05	10.0565	10.4888	10.4968	10.0388	10.1713	10.71	5.68137	7.08545	7.70258	8.47467	6.7244	6.44972
	ENSMUSG00000051495.9	Irf2bp2	0.554602	6.88511	63.7827	4.08413e-08	5.80466e-07	129.886	123.124	149.497	151.438	143.977	145.33	84.4594	83.6572	95.3135	100.783	99.2252	110.594
	ENSMUSG00000001435.16	Col18a1	0.554493	6.34854	119.944	1.17739e-10	4.7202e-09	103.243	94.948	91.6021	99.1429	94.9617	95.4682	68.0405	69.7307	61.1953	64.5667	60.7617	70.2152
	ENSMUSG00000024235.12	Map3k8	0.553794	4.17534	44.2777	8.20064e-07	7.08677e-06	25.2719	27.5589	28.1652	20.7002	22.4471	18.4411	17.1528	15.8568	16.4684	15.6852	15.7082	16.4224
	ENSMUSG00000020288.14	Ahsa2	0.55334	5.57303	114.495	1.85487e-10	6.79559e-09	51.9805	57.3801	63.5673	54.6297	59.7127	49.2945	39.0628	36.7711	38.6783	38.5808	38.1946	38.0208
	ENSMUSG00000049907.9	Rasl11b	0.553323	4.87781	63.0022	4.54181e-08	6.32625e-07	29.1248	31.4665	36.6409	36.7311	38.2302	41.5634	24.7643	23.8951	22.1863	24.0194	25.1762	25.5008
	ENSMUSG00000020790.15	Ankfy1	0.552706	6.65249	163.323	5.32249e-12	3.66873e-10	135.176	136.972	140.891	130.582	132.227	117.314	86.6069	90.2296	96.7548	89.5225	91.0484	86.5834
	ENSMUSG00000067924.5	Rtl8b	0.551663	6.73154	123.97	8.50881e-11	3.60158e-09	124.074	120.519	138.414	118.442	118.724	129.442	86.3895	87.2244	87.2093	82.1482	79.0789	89.4831
	ENSMUSG00000024807.19	Syvn1	0.549065	6.3409	208.099	4.31203e-13	4.97996e-11	101.088	99.8154	104.511	96.6526	100.398	90.9289	69.9978	67.8982	67.3858	69.2723	65.8722	65.1476
	ENSMUSG00000031995.10	St14	0.548892	5.78467	88.511	2.15416e-09	5.1304e-08	66.5429	76.4383	72.6297	69.8825	65.8506	67.1682	45.75	54.0205	46.6644	50.6373	40.0505	48.9691
	ENSMUSG00000003873.12	Bax	0.548735	5.2937	133.817	3.98715e-11	1.96418e-09	43.9484	48.5366	50.3975	46.1474	45.6833	46.6702	32.3757	31.7135	32.039	32.7047	30.6902	32.8719
	ENSMUSG00000030847.9	Bag3	0.54801	6.52877	117.57	1.43212e-10	5.58719e-09	105.006	105.917	127.069	110.193	122.319	107.526	72.6617	74.1285	80.9716	76.3423	80.908	78.6432
	ENSMUSG00000057137.10	Tmem140	0.547954	6.94603	83.1663	3.83093e-09	8.25693e-08	157.509	153.836	174.403	150.971	146.695	133.06	106.505	99.8316	115.326	101.041	98.7949	105.472
	ENSMUSG00000062825.16	Actg1	0.547413	10.7075	132.062	4.54755e-11	2.20291e-09	2020.52	1968.41	2144.92	2015.7	2243.22	1842.55	1367.58	1416.06	1321.23	1397.43	1379.98	1489.59
	ENSMUSG00000060935.7	Tmem263	0.547383	3.96776	39.7196	1.88001e-06	1.41867e-05	18.6111	18.7154	18.3204	19.6885	16.7476	17.0935	11.5802	12.4362	13.515	13.0632	12.1577	11.951
	ENSMUSG00000028840.11	Zfp593	0.547306	3.04557	45.5329	6.59201e-07	5.88021e-06	11.6238	9.11775	10.6272	9.6497	11.3112	8.2985	7.82887	7.35421	6.40307	6.36771	6.96648	6.55812
	ENSMUSG00000039361.12	Picalm	0.54663	7.78821	77.7753	7.0589e-09	1.36324e-07	274.726	272.024	272.068	261.32	274.275	245.338	160.628	184.149	200.858	186.7	174.727	188.099
	ENSMUSG00000018920.12	Cxcl16	0.543036	6.43532	99.416	7.22213e-10	2.09911e-08	111.732	103.929	124.136	98.9872	106.711	99.3693	76.9568	80.2611	68.0001	76.2252	66.0874	75.1745
	ENSMUSG00000000628.11	Hk2	0.541732	4.79681	30.643	1.202e-05	6.90891e-05	44.5361	30.3011	35.4673	34.8634	33.7583	33.9033	23.4323	25.752	23.7929	20.6482	26.8169	25.9073
	ENSMUSG00000043079.18	Synpo	0.540818	6.97827	121.669	1.02326e-10	4.19873e-09	148.693	160.418	153.54	152.216	154.85	138.521	104.195	100.442	106.773	100.783	99.2521	112.843
	ENSMUSG00000044317.8	Gpr4	0.540436	4.09148	34.2467	5.54928e-06	3.61384e-05	18.9376	20.0179	20.3415	20.6223	22.7978	21.5619	10.8191	12.7783	17.7207	14.1401	13.1798	16.6663
	ENSMUSG00000020484.20	Xbp1	0.540191	7.8796	92.1724	1.47533e-09	3.73957e-08	309.598	320.013	312.164	282.798	291.549	244.629	190.149	188.766	222.264	201.075	208.537	200.104
	ENSMUSG00000042608.16	Stk40	0.539765	6.5319	225.064	1.88736e-13	2.47471e-11	112.059	112.772	123.027	112.606	118.461	108.306	77.5548	76.7917	85.1064	77.3958	76.3354	79.5104
	ENSMUSG00000113555.2	Gm10095	0.539395	4.63293	60.0142	6.88392e-08	8.95218e-07	27.3616	26.3249	29.9255	32.6066	33.5829	27.378	20.3877	19.8393	20.9104	21.1399	19.0973	20.3247
	ENSMUSG00000030452.17	Nipa2	0.539379	4.78295	42.4872	1.12798e-06	9.26125e-06	34.9367	38.939	32.5334	34.9412	29.9879	31.8464	20.7411	23.944	25.187	25.0963	21.1415	23.7393
	ENSMUSG00000024766.16	Lipo3	0.539197	4.45223	34.0619	5.76645e-06	3.73139e-05	25.4026	28.2445	22.819	24.5133	25.1653	27.1652	16.1199	18.6909	19.8944	19.5011	15.493	15.7178
	ENSMUSG00000030411.17	Nova2	0.538721	5.35165	36.6853	3.38292e-06	2.35979e-05	42.3158	44.3548	55.4829	44.98	52.6103	47.0958	31.3971	33.5215	41.5136	30.5978	30.5019	29.7554
	ENSMUSG00000063694.6	Cycs	0.538452	5.78992	50.7034	2.79434e-07	2.89374e-06	90.3782	67.7319	64.3497	67.2366	62.957	60.0755	47.2451	45.5179	48.72	44.2462	51.1592	47.5328
	ENSMUSG00000075700.11	Selenot	0.538331	7.04309	51.2146	2.57566e-07	2.71401e-06	174.814	170.152	162.146	155.718	151.079	139.94	99.1657	115.078	124.848	111.552	101.592	104.605
	ENSMUSG00000019818.16	Cd164	0.537652	7.97162	30.5328	1.23177e-05	7.06375e-05	347.277	343.732	307.861	290.658	275.854	279.028	188.763	215.398	244.781	218.609	191.134	212.055
	ENSMUSG00000026473.17	Glul	0.537229	8.47631	43.4688	9.46069e-07	7.96259e-06	444.12	417.497	513.885	437.738	423.689	449.68	291.191	299.348	312.356	289.309	324.143	335.114
	ENSMUSG00000038059.8	Smim3	0.537115	5.00392	72.3001	1.35972e-08	2.32472e-07	36.1774	36.9509	44.6601	32.7623	39.8962	37.2369	29.4942	26.5582	25.0216	25.9859	23.3471	26.5577
	ENSMUSG00000001467.6	Cyp51	0.535952	5.22763	51.1241	2.61295e-07	2.74006e-06	51.5234	41.6126	39.1183	45.5248	46.4725	48.9399	32.4844	33.4727	30.4559	34.4137	29.8025	27.6959
	ENSMUSG00000004936.9	Map2k1	0.533933	6.26808	165.847	4.54881e-12	3.25109e-10	95.4718	102.078	109.01	94.0067	94.3479	87.5244	64.3979	66.6033	69.3941	67.2589	65.1998	69.5106
	ENSMUSG00000035478.15	Mbd3	0.532886	6.16578	124.383	8.23416e-11	3.50233e-09	80.4523	85.2133	87.2991	82.4115	86.9824	87.5244	63.5824	60.886	56.966	61.1253	54.2256	55.5814
	ENSMUSG00000027195.11	Hsd17b12	0.531862	5.89175	45.8816	6.20847e-07	5.59821e-06	84.8275	72.4621	72.8905	65.9915	69.4456	62.9126	43.6297	52.1147	55.3593	50.9183	48.2543	46.2049
	ENSMUSG00000030609.19	Aen	0.531272	5.14977	78.7869	6.27842e-09	1.24138e-07	49.1072	40.3101	44.6601	44.8244	43.8419	41.4216	26.1778	30.0765	33.9528	27.5778	30.9053	34.1185
	ENSMUSG00000025171.3	Ubtd1	0.530425	4.02677	123.535	8.80916e-11	3.70841e-09	18.4805	20.5664	21.1891	20.0776	20.3427	19.6469	14.3529	13.6334	13.7749	13.0163	13.7178	14.7964
	ENSMUSG00000040857.16	Erf	0.529955	5.61821	71.3896	1.52194e-08	2.55694e-07	51.5887	60.0538	69.6959	57.3535	61.2034	58.5151	40.3676	43.3679	43.9709	42.8182	35.4779	42.1671
	ENSMUSG00000033088.20	Triobp	0.528731	5.88312	85.3577	3.01497e-09	6.74078e-08	70.0039	74.9986	76.9328	72.6062	69.4456	64.5439	46.5655	52.8966	56.0209	51.4099	42.6327	47.4786
	ENSMUSG00000043953.13	Ccrl2	0.528221	5.75707	76.1684	8.52387e-09	1.59322e-07	66.0205	75.1358	66.2404	65.9137	66.6398	65.395	48.8761	41.9508	49.8541	48.0856	43.7624	48.5626
	ENSMUSG00000038612.17	Mcl1	0.52796	8.53796	197.831	7.32675e-13	7.51595e-11	440.529	454.859	479.004	448.4	459.814	424.784	307.039	320.434	314.01	317.051	300.285	318.828
	ENSMUSG00000020571.14	Pdia6	0.527629	7.71057	93.3409	1.31081e-09	3.42716e-08	246.385	233.291	257.138	248.246	240.254	239.025	167.179	168.243	173.615	166.989	170.45	169.346
	ENSMUSG00000035505.15	Cox18	0.527532	3.01338	30.4628	1.2511e-05	7.14874e-05	10.5137	11.5172	11.0183	8.24894	10.3467	7.5183	7.04055	6.52351	6.89924	6.50817	7.12786	6.99171
	ENSMUSG00000049866.13	Arl4c	0.526836	6.2219	61.2552	5.78141e-08	7.70222e-07	99.194	83.6365	91.7325	84.9796	93.471	77.169	65.6484	67.263	60.6047	65.4329	55.6242	53.3592
	ENSMUSG00000022035.7	Ccdc25	0.526547	4.93202	111.249	2.45303e-10	8.52161e-09	40.8792	37.705	40.5527	35.7973	37.8794	36.0311	24.6012	28.0486	25.8722	24.909	26.4134	29.105
	ENSMUSG00000025939.20	Ube2w	0.525983	4.55667	39.9658	1.79482e-06	1.36188e-05	29.8431	29.6841	27.9696	29.2604	24.8145	29.0093	16.0655	20.3524	23.7929	19.2904	20.0925	18.9156
	ENSMUSG00000023272.5	Creld2	0.525622	5.01641	64.1685	3.87662e-08	5.56305e-07	41.4669	36.8823	38.8576	40.7778	38.1425	34.187	25.3623	24.3349	28.1877	26.5477	28.1887	27.3707
	ENSMUSG00000022091.7	Sorbs3	0.525205	7.95426	73.7456	1.13946e-08	2.01328e-07	259.119	288.615	339.678	289.024	310.401	284.064	208.607	200.372	225.336	204.797	185.109	206.228
	ENSMUSG00000061024.9	Rrs1	0.524842	4.51738	74.1556	1.08429e-08	1.93145e-07	30.3002	28.1074	26.4049	28.4044	27.182	27.8745	21.5294	20.7677	20.0834	18.6817	18.4787	17.4251
	ENSMUSG00000068523.13	Gng5	0.524572	6.074	29.6173	1.51266e-05	8.43598e-05	88.0927	87.1328	82.3441	79.2209	71.9008	74.0482	50.7518	55.12	61.4316	56.6305	53.2303	58.5895
	ENSMUSG00000064339.1	mt-Rnr2	0.523788	7.86647	45.8877	6.20202e-07	5.59529e-06	291.64	322.343	288.498	260.775	281.378	297.895	201.621	198.857	214.987	197.633	204.879	194.115
	ENSMUSG00000062127.12	Cttnbp2nl	0.523779	7.51113	84.7948	3.20479e-09	7.10659e-08	204.069	210.942	242.077	218.908	234.116	229.45	145.514	154.903	169.74	145.942	151.057	164.495
	ENSMUSG00000045319.14	Proser2	0.52213	3.03137	34.5391	5.22349e-06	3.42196e-05	9.92593	9.11775	11.8007	9.10496	10.5221	9.71705	7.25802	6.57237	6.85199	7.70212	6.48232	7.04591
	ENSMUSG00000027639.17	Samhd1	0.521317	8.54921	56.6425	1.12137e-07	1.34866e-06	593.728	518.135	522.1	475.17	491.907	376.27	354.855	340.517	379.813	339.713	331.728	327.879
	ENSMUSG00000020806.16	Rhbdf2	0.521083	6.10724	132.576	4.37509e-11	2.14318e-09	80.9094	80.5516	87.6251	82.4115	82.3352	80.5026	55.9167	57.832	59.6359	59.2057	50.7289	61.1368
	ENSMUSG00000026576.13	Atp1b1	0.518814	8.24194	108.943	3.00415e-10	1.00749e-08	329.515	362.311	390.988	359.296	358.364	352.083	229.701	258.106	261.486	257.003	234.171	261.864
	ENSMUSG00000078931.5	Pdf	0.518526	3.85758	52.0562	2.25508e-07	2.42905e-06	15.8031	18.5097	16.6905	17.5095	18.1506	15.8877	11.6618	13.5112	12.4517	11.4712	12.1846	10.2166
	ENSMUSG00000028249.16	Sdcbp	0.517791	7.7788	158.853	7.06741e-12	4.59883e-10	271.461	280.936	276.176	256.573	268.576	250.941	179.819	199.419	183.728	188.62	181.882	187.313
	ENSMUSG00000029163.10	Emilin1	0.517781	7.07468	43.6256	9.20094e-07	7.77776e-06	163.582	173.169	175.902	159.298	147.835	159.941	113.872	119.475	108.828	109.398	106.837	126.068
	ENSMUSG00000021242.10	Npc2	0.516652	9.97768	68.4751	2.19968e-08	3.49437e-07	1244.14	1315.77	1415.37	1170.65	1266.94	1205.84	874.985	992.721	757.381	965.902	804.857	929.627
	ENSMUSG00000004263.16	Atn1	0.516503	7.13426	108.501	3.12435e-10	1.0398e-08	158.684	163.914	180.401	152.372	144.591	162.566	107.457	105.231	121.186	113.893	115.525	109.754
	ENSMUSG00000043424.11	Eif3j2	0.515778	4.25483	30.7298	1.17907e-05	6.79507e-05	24.1618	22.4859	23.471	21.4784	25.0776	18.2993	14.2714	16.5653	18.7603	16.7621	13.664	14.2544
	ENSMUSG00000030602.14	Pak4	0.51347	6.19417	49.4982	3.39403e-07	3.39189e-06	73.3344	90.0806	89.7766	85.6022	83.3874	82.9141	56.1613	60.2508	66.9841	59.6271	54.6559	56.0692
	ENSMUSG00000043336.15	Filip1l	0.512928	6.8815	112.458	2.20865e-10	7.82857e-09	149.934	137.657	130.003	147.936	147.66	133.343	105.635	102.495	93.7541	104.833	94.814	91.5969
	ENSMUSG00000049265.9	Kcnk3	0.512163	5.75679	33.4577	6.54353e-06	4.13302e-05	64.9104	56.6946	52.3534	63.2678	63.2201	77.3818	45.0704	43.8565	37.1898	44.0589	46.6673	48.0477
	ENSMUSG00000020601.9	Trib2	0.511547	6.63218	82.1262	4.29969e-09	9.08877e-08	109.446	107.905	104.055	117.119	128.282	127.031	80.9256	83.9993	83.9723	75.2654	78.2182	84.0903
	ENSMUSG00000018167.11	Stard3	0.511086	6.05232	114.577	1.84203e-10	6.77702e-09	77.6443	85.2818	93.9492	77.5867	80.4061	79.8642	57.3302	58.4917	58.2655	57.6137	54.4138	61.1368
	ENSMUSG00000055491.15	Pprc1	0.509765	5.46125	73.4875	1.17576e-08	2.06279e-07	56.3558	48.6737	49.5499	53.7737	59.8881	50.2166	35.8008	37.7239	42.8367	32.6813	39.4319	34.9857
	ENSMUSG00000037242.9	Clic4	0.509109	10.0021	132.074	4.54369e-11	2.20291e-09	1334.84	1326.26	1323.18	1227.22	1251.07	1125.83	884.799	849.131	944.866	849.832	883.344	920.142
	ENSMUSG00000031722.11	Hp	0.508559	9.67355	62.1267	5.12243e-08	6.95176e-07	1032.23	1046.62	992.041	900.224	897.883	944.965	613.153	666.521	649.687	705.879	659.691	792.015
	ENSMUSG00000054604.8	Cggbp1	0.505753	6.42027	37.6777	2.78231e-06	1.98937e-05	109.185	99.6097	99.491	104.435	101.45	98.0216	64.3436	73.6643	83.0036	76.67	69.0192	64.3617
	ENSMUSG00000029674.14	Limk1	0.505699	4.90422	77.8577	6.9915e-09	1.35322e-07	30.3655	33.1118	39.4443	34.3965	34.9859	35.3218	26.2865	24.4326	23.9347	24.5344	22.9437	24.0916
	ENSMUSG00000024019.19	Cmtr1	0.505571	6.64211	116.618	1.55049e-10	5.91664e-09	133.935	137.452	139.848	129.337	128.018	114.122	96.2027	88.446	97.6527	88.0945	91.8015	89.2121
	ENSMUSG00000027995.11	Tlr2	0.505271	5.30793	30.0728	1.36506e-05	7.72149e-05	56.0293	49.7706	66.6316	44.5909	50.5936	40.7832	31.5602	32.9107	35.4886	41.6008	37.2532	38.6712
	ENSMUSG00000074607.12	Tox2	0.504853	4.39565	36.44	3.55223e-06	2.45636e-05	22.9211	24.9538	33.3158	25.8363	22.2717	22.6968	17.2072	16.4431	21.4538	17.6751	17.7524	16.6934
	ENSMUSG00000041645.15	Ddx24	0.50476	6.72325	99.9891	6.83783e-10	2.00075e-08	139.355	133.681	146.629	125.524	142.311	118.449	94.9523	92.3308	95.9987	90.9272	99.1714	94.6591
	ENSMUSG00000010047.13	Hyal2	0.503853	6.65347	59.4944	7.41194e-08	9.51818e-07	101.48	124.289	117.811	116.808	121.793	115.399	86.3079	82.0447	93.3997	80.8137	70.4717	78.7516
	ENSMUSG00000036249.17	Rbm43	0.503395	4.97905	83.5775	3.66117e-09	7.97094e-08	40.0955	43.2579	40.7483	40.1552	39.7208	35.1091	29.0321	27.3157	28.0459	29.0761	28.6459	26.5577
	ENSMUSG00000078771.11	ENSMUSG00000078771.11	0.501673	4.09429	31.7671	9.3917e-06	5.61089e-05	28.0146	24.0626	22.4931	22.1787	21.0441	16.8098	15.5218	16.1011	16.492	15.849	16.4613	14.7422
	ENSMUSG00000020205.9	Phlda1	0.501532	5.88329	45.9224	6.16525e-07	5.57655e-06	73.1385	76.4383	80.5838	65.0577	69.0072	68.0194	50.3168	52.3835	47.2315	52.0186	49.0074	54.5516
	ENSMUSG00000057561.11	ENSMUSG00000057561.11	0.501078	5.96423	68.6925	2.1392e-08	3.41939e-07	85.0888	80.483	81.0402	71.4389	73.7422	67.7356	54.34	55.5842	54.7923	58.6672	51.2937	50.1344
	ENSMUSG00000036752.5	Tubb4b	0.500864	8.58667	63.9186	4.0097e-08	5.73035e-07	449.41	430.317	461.857	441.629	438.77	414.854	324.273	325.564	305.173	316.489	291.758	300.156
	ENSMUSG00000033434.16	Gtpbp6	0.500244	4.53259	48.8401	3.77943e-07	3.72581e-06	28.9289	29.3413	29.0128	28.0153	27.9712	24.6827	21.3119	21.403	20.2724	19.5479	18.0483	18.1568
	ENSMUSG00000019960.9	Dusp6	0.500023	6.52362	28.8225	1.81348e-05	9.86134e-05	124.401	109.55	105.424	107.781	104.87	92.9149	85.6283	88.4949	71.2607	71.5899	65.2805	73.8737
	ENSMUSG00000028557.11	Rnf11	0.498835	6.46236	55.1406	1.40316e-07	1.62806e-06	110.426	117.365	99.0998	100.232	103.379	102.277	68.3124	77.1093	78.3489	74.727	73.538	75.7978
	ENSMUSG00000047423.11	AI837181	0.498363	5.60675	174.201	2.74452e-12	2.15593e-10	59.425	61.0821	60.829	57.5091	59.0113	60.2173	44.9617	42.4639	42.7422	40.8283	41.0995	41.4354
	ENSMUSG00000025894.12	Aasdhppt	0.497464	3.63939	36.0106	3.87117e-06	2.64846e-05	16.3255	15.4933	14.4738	14.0076	14.1171	16.2424	10.4113	10.6037	11.3885	10.5114	11.0011	10.3521
	ENSMUSG00000021519.12	Mterf3	0.49745	4.41428	37.6053	2.82193e-06	2.01357e-05	25.2719	29.9583	24.7098	24.4355	22.7978	21.7038	17.18	17.4449	19.2328	17.8624	16.9993	16.8018
	ENSMUSG00000024091.10	Vapa	0.497102	6.7141	123.512	8.825e-11	3.70841e-09	129.886	128.951	138.088	124.201	121.881	121.286	85.139	89.5211	97.4164	92.402	87.3903	89.727
	ENSMUSG00000015850.12	Adamtsl4	0.496852	6.83458	51.1945	2.58391e-07	2.72106e-06	120.94	130.939	135.154	124.045	126.528	128.449	95.6862	85.3675	88.0362	94.2515	82.6832	96.8813
	ENSMUSG00000020159.9	Gabrp	0.49583	6.40716	80.2241	5.32632e-09	1.08132e-07	110.883	105.985	91.9933	106.069	108.64	93.4114	68.0405	75.7411	81.8931	73.4394	67.2171	71.0282
	ENSMUSG00000016308.14	Ube2a	0.494147	4.59053	31.894	9.13664e-06	5.47351e-05	30.9532	27.4904	29.078	31.2059	27.182	24.8955	19.5994	19.9859	24.0765	19.782	17.9407	19.8641
	ENSMUSG00000066705.8	Fxyd6	0.493237	4.33735	29.3695	1.60015e-05	8.86137e-05	27.2963	24.8853	29.5344	23.2682	22.0963	19.1504	17.1257	15.8079	16.6574	15.7554	19.2856	19.4847
	ENSMUSG00000007029.17	Vars	0.491419	6.4718	66.4168	2.87395e-08	4.34681e-07	112.32	117.297	114.682	109.259	104.87	92.8439	80.3003	81.4583	74.663	78.6131	76.2547	72.058
	ENSMUSG00000049300.12	Prmt6	0.490808	3.61017	33.8326	6.04877e-06	3.87099e-05	14.693	14.465	13.7566	17.4317	13.328	14.2564	10.0579	10.4572	10.9159	10.6519	10.8128	9.64748
	ENSMUSG00000027806.10	Tsc22d2	0.490528	5.21336	87.1138	2.49719e-09	5.75278e-08	44.3402	41.9554	42.5738	48.6376	44.0173	45.3226	29.1136	34.45	34	30.6446	30.3943	31.2188
	ENSMUSG00000063406.12	Tmed5	0.489119	5.16344	29.2586	1.64111e-05	9.05672e-05	50.5439	47.7825	40.6831	40.9334	40.773	38.5136	28.1622	32.1777	34.1654	30.9958	31.5509	27.723
	ENSMUSG00000034471.13	Caskin2	0.488546	7.84603	46.0462	6.036e-07	5.48524e-06	214.91	259.753	283.152	274.005	291.111	269.808	183.734	181.412	228.407	182.065	169.159	190.185
	ENSMUSG00000040987.16	Mill2	0.488286	6.38083	53.5155	1.7973e-07	2.00646e-06	107.945	107.219	107.315	92.7616	108.465	92.1347	78.9955	80.4321	69.843	78.3556	66.0336	65.3373
	ENSMUSG00000006369.15	Fbln1	0.487284	6.76464	85.9268	2.83544e-09	6.38853e-08	120.94	110.921	139.522	132.606	128.895	135.117	83.9973	95.8735	86.4296	94.5558	94.7871	92.166
	ENSMUSG00000069899.4	Gm12166	0.487105	3.10705	44.0016	8.60889e-07	7.35573e-06	9.077	10.9002	11.2139	9.72752	11.0482	10.0717	7.2852	8.25822	8.12788	6.88275	6.85889	6.80202
	ENSMUSG00000032350.10	Gclc	0.485724	7.45388	46.6199	5.47415e-07	5.07246e-06	245.797	230.343	212.673	205.212	210.178	190.014	140.159	143.322	173.592	127.003	178.385	161.948
	ENSMUSG00000055723.7	Rras2	0.484973	5.76415	65.6736	3.17009e-08	4.69297e-07	63.9308	71.708	65.7188	57.12	61.5541	63.2672	40.5851	45.4691	48.72	47.2896	46.0756	45.8255
	ENSMUSG00000023068.17	Nus1	0.484921	6.01911	67.9957	2.33975e-08	3.65946e-07	80.1258	80.8943	76.6068	78.5984	75.9342	69.367	48.7402	54.2892	62.7784	53.9851	55.5973	54.3619
	ENSMUSG00000001166.18	Oas1c	0.484585	3.03635	41.0091	1.47763e-06	1.16178e-05	9.79533	11.6543	11.8007	11.8287	10.0836	10.71	8.50846	7.76957	6.2613	8.24057	8.14997	8.1841
	ENSMUSG00000027366.13	Sppl2a	0.483924	6.59993	35.0414	4.71154e-06	3.12889e-05	136.612	129.499	127.787	119.454	119.162	106.817	78.4518	86.7846	104.717	84.4424	87.6862	86.6376
	ENSMUSG00000022332.9	Khdrbs3	0.483859	3.86784	51.3631	2.51565e-07	2.66043e-06	19.1988	17.9613	18.19	15.2528	17.5368	16.3133	14.4345	12.0453	12.2154	11.3542	12.1846	12.5471
	ENSMUSG00000041926.16	Rnpep	0.483338	6.26338	125.117	7.7694e-11	3.33721e-09	93.1209	90.5605	96.3615	89.4932	87.0701	88.2337	63.5552	65.626	64.9994	64.9647	63.6397	67.0446
	ENSMUSG00000028690.5	Mmachc	0.482799	2.85442	30.8535	1.14725e-05	6.63576e-05	9.14231	8.2951	7.82367	8.63804	8.59302	7.16366	5.16488	6.62124	6.47395	5.57175	5.86368	5.79933
	ENSMUSG00000041696.15	Rasl12	0.482492	6.46303	61.3102	5.73721e-08	7.65502e-07	96.5166	99.8839	94.536	100.777	113.2	107.81	81.7954	69.9505	66.9132	75.8507	66.0605	77.8031
	ENSMUSG00000028041.18	Adam15	0.482301	7.25706	83.231	3.80367e-09	8.2196e-08	178.34	184.892	185.486	163.734	160.812	173.772	125.942	125.999	136.307	124.779	113.965	122.653
	ENSMUSG00000055447.20	Cd47	0.482111	7.776	49.6849	3.29263e-07	3.30627e-06	294.839	293.55	294.235	273.46	257.703	222.641	193.194	193.018	210.096	201.051	185.54	188.776
	ENSMUSG00000034271.17	Jdp2	0.481947	5.08417	64.8407	3.54192e-08	5.14729e-07	32.5858	38.1849	44.2689	41.089	43.8419	39.0101	28.1894	28.7816	28.613	27.929	26.6824	30.7581
	ENSMUSG00000025402.13	Nab2	0.481646	5.32513	95.1617	1.09281e-09	2.93192e-08	51.001	46.48	52.8098	44.2018	47.3493	45.3935	31.3155	35.5983	35.9611	37.3869	30.1791	35.3109
	ENSMUSG00000030615.13	Tmem126a	0.481409	3.31721	35.421	4.36085e-06	2.92946e-05	11.4279	10.7631	10.8879	11.9843	12.4511	12.4832	7.47549	8.28265	9.5219	9.22382	7.58512	7.9402
	ENSMUSG00000055172.11	C1ra	0.479886	7.48173	41.8261	1.27178e-06	1.02394e-05	230.06	224.31	274.611	194.939	206.671	175.262	153.56	164.285	153.485	147.792	156.356	161.135
	ENSMUSG00000030357.11	Fkbp4	0.479715	7.17257	63.864	4.03941e-08	5.75516e-07	146.995	144.444	171.143	163.111	171.773	168.665	117.161	118.303	124.375	116.538	108.155	108.128
	ENSMUSG00000072235.7	Tuba1a	0.479502	9.29901	48.5468	3.96637e-07	3.88156e-06	656.222	681.843	707.847	683.105	712.081	758.923	538.779	545.214	457.429	552.75	456.856	461.263
	ENSMUSG00000053198.15	Prx	0.479357	8.43138	72.0524	1.40191e-08	2.38051e-07	350.673	371.703	395.682	413.848	426.845	408.187	300.895	292.654	279.23	291.721	243.074	290.021
	ENSMUSG00000029003.12	Mad2l2	0.478971	3.51536	46.1689	5.91075e-07	5.40522e-06	14.1706	13.7109	15.191	15.4862	11.662	13.689	9.16087	8.94233	9.9472	10.4178	9.97901	11.8426
	ENSMUSG00000026421.15	Csrp1	0.478848	9.45375	82.9734	3.91349e-09	8.40231e-08	787.414	841.712	875.99	818.668	859.477	805.877	656.593	629.335	531.974	642.226	533.137	586.653
	ENSMUSG00000024487.6	Yipf5	0.477694	5.23465	30.2012	1.32634e-05	7.52684e-05	48.7154	46.0686	43.617	47.4703	41.3868	37.6624	28.1622	33.4971	36.4337	29.357	31.3357	31.4898
	ENSMUSG00000073639.7	Rab18	0.477149	6.50449	37.39	2.9435e-06	2.08158e-05	107.096	116.474	110.314	105.835	106.361	98.4472	71.4929	75.4967	84.7284	78.9175	74.9098	77.4779
	ENSMUSG00000021270.14	Hsp90aa1	0.476434	8.69818	48.4097	4.05713e-07	3.95906e-06	473.963	425.244	497.651	445.676	501.64	403.293	335.201	344.207	340.544	320.727	330.464	303.516
	ENSMUSG00000028132.16	Tlcd4	0.476141	3.6874	30.9347	1.12687e-05	6.5309e-05	15.0195	16.2474	15.1258	15.564	15.257	15.9587	9.67736	11.4589	13.515	10.2305	10.1404	11.9239
	ENSMUSG00000032575.17	Manf	0.47594	5.98443	52.7462	2.02455e-07	2.218e-06	79.4075	71.9137	83.5829	75.4077	76.4604	64.0474	57.738	51.1863	55.6901	49.2327	54.3332	56.0421
	ENSMUSG00000039697.17	Ncoa7	0.474782	4.69837	41.7905	1.28006e-06	1.02966e-05	38.3324	34.7571	30.8383	30.1164	32.5307	31.1371	24.4924	24.6525	21.312	24.2769	23.6699	23.9561
	ENSMUSG00000020585.6	Laptm4a	0.474767	8.97843	153.116	1.02759e-11	6.15814e-10	630.101	629.536	672.901	594.857	582.835	586.782	430.153	445.504	462.273	455.736	427.403	439.34
	ENSMUSG00000091957.5	Rps2-ps10	0.47469	5.78869	106.672	3.68095e-10	1.18874e-08	65.4328	64.3041	65.9796	62.1005	62.8693	64.7567	46.0762	47.5458	47.3496	47.6876	44.4617	44.2808
	ENSMUSG00000026753.6	Ppp6c	0.473946	5.70876	36.5303	3.48881e-06	2.42106e-05	66.6082	66.1551	62.0026	62.3339	63.0447	58.6569	39.2803	45.0537	54.0835	48.2729	42.5251	43.4408
	ENSMUSG00000037692.15	Ahdc1	0.473551	5.60995	38.1962	2.51549e-06	1.8225e-05	44.2749	47.9196	54.2441	58.5208	55.3285	63.1963	35.7464	40.0206	42.1515	40.6878	33.2992	40.8121
	ENSMUSG00000047067.8	Dusp28	0.472296	3.33591	46.7617	5.34426e-07	4.97324e-06	13.5176	13.1625	11.9311	12.7625	12.6265	11.6321	9.75891	8.9912	8.69494	8.21716	8.74172	10.1353
	ENSMUSG00000030122.13	Ptms	0.472244	8.59727	58.4571	8.60185e-08	1.07842e-06	406.245	409.613	478.613	444.042	426.056	510.393	330.389	333.041	295.911	339.923	302.383	326.605
	ENSMUSG00000035621.14	Midn	0.471733	6.9703	81.5963	4.56217e-09	9.49399e-08	147.191	156.373	160.385	140.621	141.785	145.33	107.484	107.113	108.309	107.9	96.2665	116.041
	ENSMUSG00000039942.16	Ptger4	0.46956	3.34167	33.1958	6.91513e-06	4.32853e-05	12.7339	13.5738	13.6914	11.0505	11.3989	12.8379	10.2754	9.18666	9.23837	8.12351	9.76383	7.886
	ENSMUSG00000002233.14	Rhoc	0.469393	6.59634	76.2412	8.45081e-09	1.58126e-07	123.421	122.438	123.288	113.929	108.553	107.171	85.0031	84.4879	81.1843	78.5195	80.6121	95.1198
	ENSMUSG00000045664.6	Cdc42ep2	0.468293	5.3303	55.2876	1.37244e-07	1.60166e-06	45.3197	44.0806	52.6142	50.3496	53.9256	48.3015	36.6435	36.7711	38.8673	34.3669	29.1032	36.991
	ENSMUSG00000030157.6	Clec2d	0.467114	7.36435	79.6211	5.70524e-09	1.14098e-07	205.833	215.056	202.829	203.733	209.301	191.859	133.308	138.24	158.352	152.146	150.142	156.555
	ENSMUSG00000006456.11	Rbm14	0.466511	5.29173	45.0325	7.18802e-07	6.31814e-06	39.5078	44.4233	52.4186	43.9684	43.6666	42.0599	29.6573	34.9631	35.6067	31.3938	30.6364	30.2703
	ENSMUSG00000024539.18	Ptpn2	0.466499	4.2999	51.1611	2.59766e-07	2.7306e-06	27.1657	26.5992	23.7318	21.7896	23.0609	22.9095	16.2558	17.4693	18.3822	16.9493	19.447	16.7205
	ENSMUSG00000011114.19	Tbrg1	0.46564	6.54974	79.8898	5.53286e-09	1.11546e-07	121.658	121.684	125.44	105.991	122.845	98.7309	89.9505	84.9033	79.6957	81.5863	85.4806	82.7082
	ENSMUSG00000059436.14	Max	0.465099	6.22386	131.028	4.9175e-11	2.31774e-09	90.7047	92.6172	96.3615	95.4075	89.876	85.3256	64.2348	66.1635	69.9139	69.7171	64.6887	63.901
	ENSMUSG00000022074.7	Tnfrsf10b	0.46506	3.27718	33.2232	6.87515e-06	4.30969e-05	12.3421	11.6543	10.4316	12.7625	12.4511	9.85891	7.96479	9.04006	8.17513	7.56166	8.90311	8.64479
	ENSMUSG00000034595.18	Ppp1r18	0.464669	6.57002	90.8547	1.68825e-09	4.16807e-08	110.753	113.732	118.007	110.116	112.761	100.079	85.0846	84.83	81.3496	80.5562	72.3007	78.0741
	ENSMUSG00000038668.15	Lpar1	0.464535	4.4622	40.2068	1.71548e-06	1.31227e-05	28.0146	25.9822	30.5123	28.2487	26.3929	22.4131	16.7995	19.9614	20.3197	19.5948	17.9138	22.5198
	ENSMUSG00000027835.12	Pdcd10	0.464512	5.06888	35.2148	4.5477e-06	3.03743e-05	43.4913	42.161	41.7262	39.2214	39.4578	34.6126	26.5584	29.4902	31.8027	30.2466	28.3501	27.994
	ENSMUSG00000079505.3	Gm11131	0.464156	3.27257	36.1143	3.79133e-06	2.59894e-05	11.6891	11.8599	12.0615	11.9843	11.3112	11.4902	8.64438	8.28265	8.86033	8.61514	8.14997	8.48219
	ENSMUSG00000033684.15	Qsox1	0.464145	7.46822	67.8813	2.37458e-08	3.70065e-07	208.118	221.705	225.322	223.577	224.821	190.227	155.789	153.803	153.343	152.825	148.986	173.058
	ENSMUSG00000009013.6	Dynll1	0.46361	7.34021	70.2939	1.74559e-08	2.8947e-07	176.12	182.218	200.416	176.496	191.677	179.446	139.588	143.224	138.67	138.943	121.846	119.97
	ENSMUSG00000023961.17	Enpp4	0.463281	6.16698	80.1886	5.34785e-09	1.08357e-07	96.7778	94.331	88.4727	86.7695	88.473	79.7224	61.7339	62.8407	73.5998	65.5734	64.0701	59.9174
	ENSMUSG00000105987.6	AI506816	0.462856	5.36615	49.1731	3.57879e-07	3.54203e-06	52.2418	42.6409	51.571	42.2563	46.6478	38.3008	33.5446	34.2789	32.8423	32.1663	34.8593	30.9749
	ENSMUSG00000071172.14	Srsf3	0.462849	7.42248	29.4411	1.57433e-05	8.73797e-05	227.839	212.45	204.328	204.978	198.692	168.382	144.753	150.847	162.179	147.3	141.535	136.176
	ENSMUSG00000038463.9	Olfml2b	0.461925	4.47451	41.4386	1.36523e-06	1.08714e-05	20.8967	25.9822	25.7529	26.3032	27.6204	29.9314	18.2674	19.9614	16.6338	18.6349	19.447	20.5686
	ENSMUSG00000028266.18	Lmo4	0.461923	5.88087	114.018	1.93186e-10	7.03333e-09	72.4201	71.2281	78.4975	64.5907	70.0594	68.9414	52.1381	53.8006	51.0119	53.6105	48.7922	49.8363
	ENSMUSG00000012296.17	Tjap1	0.460567	5.0343	75.517	9.20923e-09	1.69588e-07	37.6794	33.6603	41.0743	37.5871	38.9316	40.8542	27.9176	29.3436	28.5657	27.0628	28.2425	25.826
	ENSMUSG00000060591.10	Ifitm2	0.460397	7.74759	103.097	5.10567e-10	1.54929e-08	257.617	254.68	284.064	246.846	242.797	248.813	177.998	174.009	192.872	180.777	190.596	199.372
	ENSMUSG00000049307.7	Fut4	0.459145	3.41247	36.4641	3.53518e-06	2.44935e-05	12.7992	13.9166	15.3214	11.7508	12.1881	11.7739	9.26961	10.5305	9.71092	8.89607	9.38726	8.83449
	ENSMUSG00000046993.7	Gm5637	0.458585	2.82147	31.4297	1.01079e-05	5.97125e-05	9.53412	8.77498	8.34525	7.47073	9.20681	7.87294	6.27941	6.20588	5.29257	6.32089	6.40163	6.77492
	ENSMUSG00000030351.6	Tspan11	0.458578	6.22357	46.1221	5.95818e-07	5.43719e-06	71.8324	82.4025	96.0355	83.8901	87.4208	89.5103	65.4581	65.1862	56.7061	62.5066	50.2178	71.8141
	ENSMUSG00000026547.16	Tagln2	0.457654	9.27979	68.3207	2.24379e-08	3.55399e-07	749.343	734.219	779.433	752.365	708.047	665.441	550.821	571.185	487.838	576.91	472.914	536.194
	ENSMUSG00000011877.14	Git1	0.457561	7.04293	73.1644	1.22298e-08	2.13063e-07	134.196	150.614	161.754	153.539	157.305	155.827	115.177	115.126	115.94	111.365	101.081	106.231
	ENSMUSG00000047879.18	Usp14	0.457484	5.4517	38.3083	2.46155e-06	1.79087e-05	57.9883	54.4323	52.7446	49.1045	48.7522	46.1737	31.9951	37.1376	44.5143	39.1895	36.2849	36.1239
	ENSMUSG00000022793.18	B4galt4	0.457243	5.77718	79.7298	5.6348e-09	1.13079e-07	57.7271	69.8571	66.2404	58.5208	66.289	67.8775	47.3266	47.7413	45.8374	46.3532	45.3225	48.942
	ENSMUSG00000002602.17	Axl	0.4565	7.54789	93.6189	1.27466e-09	3.35783e-08	226.272	235.279	253.617	223.733	244.638	225.762	166.554	174.693	164.731	180.731	154.607	185.687
	ENSMUSG00000040280.11	Ndufa4l2	0.456117	4.77483	38.0985	2.56357e-06	1.85426e-05	27.0351	29.547	29.7299	33.3848	29.2864	37.0241	23.0517	23.9195	20.4142	24.9324	20.4422	22.7637
	ENSMUSG00000024165.10	Jpt2	0.456015	4.71401	44.18	8.34256e-07	7.18094e-06	31.6063	31.7407	37.7492	28.7935	31.3031	29.5767	24.1118	25.8741	24.5726	22.3338	21.2491	21.0022
	ENSMUSG00000038459.11	Abhd17c	0.455221	5.95621	51.6003	2.42299e-07	2.57179e-06	69.6121	70.8854	79.0843	70.116	71.4624	79.2259	54.9109	54.9734	51.4372	55.975	48.2005	55.7711
	ENSMUSG00000020476.15	Dbnl	0.454387	6.74125	109.28	2.91589e-10	9.83564e-09	131.91	133.339	134.828	122.722	128.282	117.669	95.8222	95.6292	93.7541	94.7197	88.7083	92.464
	ENSMUSG00000027357.17	Crls1	0.453795	3.89449	39.05	2.13479e-06	1.58825e-05	20.1131	15.8361	17.9944	16.1088	17.8875	16.1005	11.8792	13.1447	14.6255	12.3843	11.6198	12.3032
	ENSMUSG00000001525.11	Tubb5	0.453593	8.26879	33.6351	6.3041e-06	4.00646e-05	334.87	333.586	374.623	331.825	327.061	338.324	268.954	295.977	227.344	257.728	212.114	227.8
	ENSMUSG00000034203.9	Chchd4	0.453273	4.12634	49.8232	3.21961e-07	3.24649e-06	18.0234	22.0746	20.9283	23.1904	20.7811	19.4341	14.7879	13.8289	16.303	14.3742	16.7034	14.8235
	ENSMUSG00000031799.11	Tpm4	0.453166	8.79276	86.8204	2.5765e-09	5.91983e-08	511.512	534.382	550.46	507.387	543.202	471.241	371.464	388.649	382.128	383.163	365.458	386.739
	ENSMUSG00000037720.17	Tmem33	0.453113	5.66119	40.0417	1.76941e-06	1.3457e-05	64.3227	60.0538	59.0035	57.12	55.767	56.5291	37.9211	40.9735	51.0355	43.7078	42.7134	41.4083
	ENSMUSG00000031955.11	Bcar1	0.453084	6.11969	81.0554	4.84817e-09	1.00056e-07	74.0527	79.5918	78.6931	78.3649	91.3666	85.3256	57.4117	59.1513	60.1794	61.8745	55.6242	61.5433
	ENSMUSG00000079037.10	Prnp	0.452779	7.69665	113.01	2.10617e-10	7.52655e-09	250.303	245.562	276.371	243.811	242.797	227.464	181.07	178.505	183.539	185.319	172.333	185.253
	ENSMUSG00000024395.10	Lims2	0.452469	6.90432	64.315	3.80088e-08	5.46894e-07	128.515	131.145	150.801	139.532	144.152	134.407	106.233	90.7427	107.789	99.8701	94.6258	106.176
	ENSMUSG00000022175.10	Lrp10	0.451625	7.74841	131.046	4.9108e-11	2.31774e-09	229.864	248.304	258.116	242.254	249.198	262.148	191.644	180.728	183.161	178.436	174.861	180.592
	ENSMUSG00000025979.14	Mob4	0.45141	5.20267	49.2514	3.53333e-07	3.50699e-06	45.9074	47.5768	44.7905	38.4432	41.4745	39.2228	28.4069	32.6664	34.1891	30.7383	31.2819	31.0833
	ENSMUSG00000049382.11	Krt8	0.45135	7.45968	41.8658	1.2626e-06	1.01796e-05	221.244	202.03	218.02	209.57	239.114	179.304	168.919	169.978	143.963	159.872	134.031	151.379
	ENSMUSG00000111133.2	Gm5831	0.451144	6.40761	67.8688	2.37842e-08	3.70333e-07	94.7535	101.941	92.1889	95.7966	96.7153	99.7239	66.3008	73.5177	73.8597	77.4192	64.3122	69.5648
	ENSMUSG00000024561.12	Mbd1	0.450442	6.68705	56.4592	1.15222e-07	1.38005e-06	111.014	122.85	107.901	130.894	128.194	134.62	91.7446	88.104	85.1537	88.0242	91.0215	94.0087
	ENSMUSG00000019916.15	P4ha1	0.450393	6.68966	99.9197	6.88318e-10	2.01065e-08	111.993	114.76	125.896	115.329	120.39	111.711	85.9273	83.0953	88.6033	82.5461	84.1088	88.0468
	ENSMUSG00000039456.11	Morc3	0.450385	5.47663	60.6098	6.32869e-08	8.31696e-07	57.6618	59.4368	54.0485	55.7971	52.1719	47.4504	40.9657	39.6053	43.4747	39.7982	37.1456	38.0479
	ENSMUSG00000000184.13	Ccnd2	0.449549	7.36181	58.1727	8.96325e-08	1.11016e-06	217.652	192.09	198.33	202.722	195.973	201.292	151.331	149.283	151.642	150.18	137.043	145.173
	ENSMUSG00000027613.16	Eif6	0.449468	5.598	78.8767	6.2138e-09	1.23197e-07	54.6579	57.5172	64.0889	57.5869	58.4852	52.4863	43.4122	41.8042	43.0966	41.4369	42.7134	40.0533
	ENSMUSG00000031997.10	Trpc6	0.449431	4.46219	43.7769	8.95753e-07	7.60147e-06	21.7456	24.4054	24.449	23.5017	27.4451	29.5767	17.5062	17.7136	20.0125	18.5881	17.9407	18.7801
	ENSMUSG00000030291.13	Med21	0.449355	4.07325	40.2327	1.70719e-06	1.30807e-05	20.3743	18.0984	18.3204	18.8325	21.2195	18.4411	12.3142	13.0714	15.287	15.5915	13.8792	14.1731
	ENSMUSG00000052040.11	Klf13	0.448433	7.72876	85.6764	2.91297e-09	6.53786e-08	217.326	215.535	260.919	254.783	246.479	262.36	181.342	180.777	179.475	183.47	164.721	178.153
	ENSMUSG00000027248.14	Pdia3	0.448317	8.77599	91.0208	1.65965e-09	4.11117e-08	505.961	516.216	540.42	481.629	517.686	480.036	356.486	373.477	376.41	372.745	371.886	378.447
	ENSMUSG00000025348.11	Itga7	0.447959	4.90886	45.473	6.66035e-07	5.93207e-06	38.6589	34.6886	34.4241	33.9296	30.6894	35.9602	22.1274	27.9753	22.4934	27.0394	25.3375	27.9127
	ENSMUSG00000026342.11	Slc35f5	0.44604	5.54932	110.956	2.5165e-10	8.65587e-09	50.6092	61.6991	54.7657	52.2173	59.4497	54.685	39.2531	41.4377	43.0258	40.8283	38.5174	41.5709
	ENSMUSG00000032307.17	Ube2q2	0.445966	5.02575	38.9788	2.164e-06	1.60655e-05	39.769	37.705	37.6188	35.4082	35.1612	38.7973	25.0361	28.0731	31.3301	28.9824	24.3423	27.0455
	ENSMUSG00000038034.16	Igsf8	0.445933	5.18493	44.9447	7.2984e-07	6.4087e-06	46.038	47.5768	52.4186	45.0579	42.2636	38.8682	30.0651	32.5198	36.1265	32.5643	31.1474	37.5601
	ENSMUSG00000074643.13	Cpne1	0.445747	6.19307	57.9374	9.27476e-08	1.14144e-06	79.9299	91.3146	88.929	85.68	80.6692	78.7294	62.7125	62.0832	59.8249	64.8242	57.9912	63.5758
	ENSMUSG00000038884.15	Shfl	0.445706	6.21966	54.0876	1.64628e-07	1.86397e-06	97.888	105.3	104.576	88.4037	94.2602	75.2539	70.7589	67.8249	70.8118	68.0549	68.4006	69.619
	ENSMUSG00000023004.9	Tuba1b	0.445513	9.20401	72.5876	1.31247e-08	2.25944e-07	651.977	650.308	719.973	650.11	665.433	638.417	502.761	525.106	464.163	486.732	469.363	471.724
	ENSMUSG00000067365.12	Tmem128	0.445446	4.7291	72.9223	1.25971e-08	2.17938e-07	31.6063	29.9583	33.3158	30.5833	32.3554	31.0662	20.9314	22.2581	25.376	23.6916	22.5671	23.8477
	ENSMUSG00000024843.16	Chka	0.445388	6.30819	86.521	2.66027e-09	6.05646e-08	79.1463	92.2744	99.0998	90.9718	92.0681	93.8369	65.893	68.9488	69.2051	71.4963	60.95	65.4186
	ENSMUSG00000022557.12	Bop1	0.445139	5.10686	58.4435	8.61882e-08	1.07899e-06	37.6794	36.7452	42.4434	41.3225	43.1405	39.1519	29.4398	28.0731	32.039	28.5376	29.8832	28.5359
	ENSMUSG00000039994.16	Timeless	0.445073	4.60487	39.1896	2.07871e-06	1.55116e-05	30.1043	31.2609	34.6197	32.9957	30.3386	27.378	21.8012	22.5024	27.1481	20.9994	22.6747	22.0049
	ENSMUSG00000053192.10	Mllt11	0.444336	2.89	30.1871	1.33053e-05	7.5482e-05	9.27291	9.0492	9.25801	8.32676	8.68071	7.16366	6.36096	6.76783	6.45032	5.92291	6.80509	5.74513
	ENSMUSG00000019970.16	Sgk1	0.443727	6.72966	40.2805	1.692e-06	1.29952e-05	124.597	129.911	121.462	108.715	127.054	126.393	92.5873	96.069	84.1141	92.683	81.3921	95.8786
	ENSMUSG00000038451.14	Spsb2	0.443417	3.61739	34.8555	4.89437e-06	3.23563e-05	13.0604	13.848	15.1258	17.4317	12.3634	15.3203	11.1725	12.1186	9.73455	10.5816	9.73693	10.7586
	ENSMUSG00000059734.8	Ndufs8	0.443212	4.95248	36.0958	3.80549e-06	2.60455e-05	37.8753	32.8376	34.9457	32.6066	32.8815	38.7263	28.2981	24.4326	23.5094	25.0026	25.6603	27.6146
	ENSMUSG00000034254.18	Agpat1	0.443121	6.05164	98.069	8.22107e-10	2.32739e-08	75.1628	73.559	76.2808	72.9175	72.1638	74.9702	54.0954	54.9978	52.6894	56.1155	53.2035	56.3131
	ENSMUSG00000040488.19	Ltbp4	0.442185	9.85029	87.183	2.47887e-09	5.74091e-08	924.744	1016.59	1079.73	1093.14	997.667	1048.02	793.951	760.636	757.074	802.589	703.829	715.675
	ENSMUSG00000018965.12	Ywhah	0.441767	7.49311	53.255	1.87097e-07	2.07556e-06	200.674	210.668	245.468	202.566	211.406	180.439	150.869	166.924	155.517	161.206	141.616	145.064
	ENSMUSG00000028273.16	Pdlim5	0.441672	6.52978	76.3301	8.36249e-09	1.56642e-07	116.434	102.9	109.727	105.758	109.956	99.2983	73.586	75.6189	91.8875	78.1215	78.0299	76.9359
	ENSMUSG00000048696.12	Mex3d	0.44167	4.5131	30.0606	1.3688e-05	7.73511e-05	21.3538	26.1193	28.6868	24.5912	24.4638	30.0732	20.143	21.8427	20.5087	18.869	16.6227	16.3411
	ENSMUSG00000037060.4	Cavin3	0.441556	5.51031	83.1563	3.83515e-09	8.25693e-08	54.1355	50.319	62.1982	54.1628	54.0133	51.8479	41.8627	39.4587	38.8437	41.2965	37.7911	41.3541
	ENSMUSG00000008393.10	Carhsp1	0.440458	7.20763	80.67	5.06376e-09	1.03891e-07	164.692	173.649	194.288	165.679	175.455	166.467	129.503	123.776	139.426	120.354	122.25	131.271
	ENSMUSG00000058704.10	Memo1	0.440109	3.91029	35.3337	4.43887e-06	2.97386e-05	16.848	18.2355	20.0808	17.1204	14.5555	19.0085	11.7977	13.1203	14.0111	13.3207	13.126	12.7639
	ENSMUSG00000028820.15	Sfpq	0.439503	7.14721	58.0709	9.0966e-08	1.12348e-06	144.971	164.668	174.011	154.706	171.685	154.622	112.594	125.999	132.503	116.843	106.999	116.258
	ENSMUSG00000024097.12	Srsf7	0.439419	6.37473	31.9467	9.03302e-06	5.42261e-05	104.941	102.9	99.9474	95.5632	95.6631	79.7933	72.7977	73.1512	80.7117	71.0749	66.8136	62.3021
	ENSMUSG00000001416.14	Cct3	0.438983	6.68234	93.3113	1.31471e-09	3.43221e-08	126.033	116.337	130.394	117.82	119.952	108.803	90.3039	88.1773	88.4143	88.352	87.0137	88.4262
	ENSMUSG00000032002.11	Dcun1d5	0.438923	4.63987	41.4159	1.37095e-06	1.09119e-05	28.7983	30.9866	31.8815	27.4705	28.3219	28.6547	18.6208	21.574	25.2815	22.7084	19.7697	21.9778
	ENSMUSG00000038848.15	Ythdf1	0.438144	6.11521	113.67	1.99016e-10	7.20051e-09	86.9172	82.4025	85.6692	75.9525	83.3874	79.7933	56.4603	59.0047	66.7951	61.4531	58.5561	62.4647
	ENSMUSG00000033715.16	Akr1c14	0.438102	5.59809	44.118	8.4341e-07	7.24187e-06	50.6745	56.9688	60.2423	54.4741	54.7147	58.0186	39.9599	45.2003	44.5379	43.7078	36.4193	37.4517
	ENSMUSG00000015461.16	Atf6b	0.438098	5.86318	73.346	1.19619e-08	2.09022e-07	66.6735	64.167	70.9998	63.1121	65.6752	64.8985	49.6916	48.5476	49.1689	46.8916	47.7163	49.9989
	ENSMUSG00000023075.10	Akirin1	0.437354	5.75605	72.2348	1.3707e-08	2.33661e-07	66.8694	66.4979	62.459	62.8009	60.8526	56.7419	43.1947	46.5685	51.2481	44.7613	44.0852	48.0206
	ENSMUSG00000001700.11	Gramd3	0.437284	4.47135	29.6403	1.50481e-05	8.40024e-05	28.6024	30.5753	23.6666	26.6923	24.2008	22.1293	21.8828	19.4239	17.2954	19.267	19.2856	18.0484
	ENSMUSG00000002881.15	Nab1	0.436948	6.28774	60.739	6.21481e-08	8.19819e-07	95.1453	97.6216	91.6021	88.9484	85.8425	84.1199	60.9728	70.5858	74.4504	69.7873	60.1968	65.3644
	ENSMUSG00000041548.5	Hspb8	0.436093	6.10716	41.5239	1.34404e-06	1.0732e-05	87.1784	75.8213	78.1063	80.3882	85.5795	75.4667	56.4875	54.3137	62.8729	55.9516	62.2679	64.714
	ENSMUSG00000025324.9	Atp10a	0.435757	4.55844	30.6895	1.18966e-05	6.84926e-05	28.733	29.4099	32.1422	28.9491	35.512	23.5479	20.0887	23.0888	21.2884	23.9257	20.3615	22.8721
	ENSMUSG00000074247.11	Dda1	0.435377	5.82211	136.214	3.33964e-11	1.68324e-09	63.6043	67.869	67.414	62.723	68.0427	62.3452	50.4256	47.5458	47.6804	48.9752	46.5597	48.671
	ENSMUSG00000024927.9	Rela	0.433995	7.00166	127.46	6.46711e-11	2.86244e-09	150.783	153.219	150.866	144.279	160.198	140.507	113.926	110.435	117.027	109.094	109.312	106.204
	ENSMUSG00000048807.3	Slc35e4	0.433563	4.83224	63.2682	4.37984e-08	6.13003e-07	28.7983	33.4546	34.8153	29.6495	33.9337	33.194	24.8186	23.0888	23.9111	25.6815	21.814	24.1729
	ENSMUSG00000002319.17	Ipo4	0.433321	5.25653	95.7633	1.02971e-09	2.7927e-08	46.5605	44.0806	48.7023	43.9684	45.0695	44.4715	33.6533	33.4238	36.0793	31.581	34.5365	32.8448
	ENSMUSG00000039220.17	Ppp1r10	0.432667	5.94116	62.9947	4.54648e-08	6.3277e-07	77.5137	67.1834	70.3478	65.3689	71.7254	69.8635	57.6292	51.1619	48.3892	55.3429	45.9949	54.1993
	ENSMUSG00000112449.2	Srp54b	0.431998	5.30455	38.677	2.29279e-06	1.68638e-05	46.234	42.8466	49.0935	47.3925	43.8419	43.0529	34.0882	34.7187	31.9208	34.9054	32.4116	33.9559
	ENSMUSG00000024048.16	Myl12a	0.431882	8.62908	114.503	1.85358e-10	6.79559e-09	462.013	474.603	473.071	466.843	452.975	461.808	351.348	329.083	359.375	354.368	327.398	347.634
	ENSMUSG00000001911.17	Nfix	0.43117	7.71508	77.057	7.67681e-09	1.45676e-07	226.795	241.792	266.396	235.873	247.532	237.961	183.299	182.658	181.719	181.527	171.58	179.318
	ENSMUSG00000037552.18	Plekhg2	0.430779	6.50054	72.5232	1.32289e-08	2.27264e-07	86.7213	100.981	102.425	110.193	108.29	113.129	78.5606	78.8929	74.096	79.8305	70.122	79.5375
	ENSMUSG00000006219.13	Fblim1	0.430572	6.45271	43.5741	9.28536e-07	7.83015e-06	97.8227	117.777	111.878	98.4425	107.851	93.1986	71.5744	75.6922	75.5136	76.4828	78.7562	87.2067
	ENSMUSG00000041143.17	Tmco4	0.43047	4.43786	74.0616	1.09668e-08	1.94755e-07	26.9045	26.6677	24.9705	27.2371	23.0609	23.9735	19.7081	19.3506	20.4615	18.6817	17.8062	17.4251
	ENSMUSG00000028937.15	Acot7	0.42981	6.5316	28.8539	1.8004e-05	9.80245e-05	90.7047	95.8392	105.228	99.3763	113.551	120.293	68.8832	72.3938	76.3879	72.0815	82.0108	92.0847
	ENSMUSG00000039985.15	Sinhcaf	0.429652	4.68892	40.3883	1.65825e-06	1.27843e-05	31.7369	31.4665	28.2304	31.9063	31.3908	26.5268	21.5838	23.8951	22.8006	24.0662	20.7918	21.3274
	ENSMUSG00000020707.7	Rnf135	0.428804	3.97025	43.3533	9.65716e-07	8.08653e-06	22.3333	20.772	18.3856	17.0426	17.0984	17.8028	13.619	13.8777	13.1369	14.5146	14.444	14.8235
	ENSMUSG00000057134.7	Ado	0.42789	4.83804	44.0222	8.57777e-07	7.33633e-06	32.3246	32.7691	30.7079	32.8401	31.3031	31.8464	23.7856	24.286	23.3913	24.4876	22.8361	23.7664
	ENSMUSG00000030397.12	Mark4	0.426372	5.80879	78.8727	6.2167e-09	1.23197e-07	56.617	63.0016	71.8474	63.7347	63.5708	69.4379	47.6257	49.4027	51.5317	48.1558	43.0362	49.1046
	ENSMUSG00000030530.16	Furin	0.425825	7.42655	120.29	1.14452e-10	4.60952e-09	181.148	185.783	201.134	195.251	202.199	201.788	146.438	144.201	144.506	147.019	138.711	147.991
	ENSMUSG00000024856.11	Cdk2ap2	0.425803	5.89119	50.9207	2.699e-07	2.8117e-06	70.3958	59.7795	66.5012	68.8708	66.4644	70.7146	54.4216	50.1357	47.3969	48.1792	47.7701	51.923
	ENSMUSG00000060512.8	0610040J01Rik	0.425802	4.30329	41.6842	1.30516e-06	1.04647e-05	22.7905	24.3369	24.775	22.9569	23.9377	22.2003	17.3975	19.3018	16.4448	17.7453	14.6054	19.4576
	ENSMUSG00000029681.13	Bcl7b	0.425593	5.51079	131.79	4.64215e-11	2.24251e-09	51.2622	56.9688	54.9613	52.373	54.2763	52.9827	41.8899	40.3627	41.5845	39.5641	39.7009	37.2349
	ENSMUSG00000036948.18	Trappc14	0.425105	5.20272	32.1163	8.70807e-06	5.26196e-05	40.8792	44.4919	45.3121	44.9022	40.8607	33.5486	31.8864	33.8147	34.5198	31.1128	26.79	28.0211
	ENSMUSG00000030629.16	Zfand6	0.42393	5.82293	33.3685	6.66758e-06	4.20224e-05	68.3714	66.8407	62.5894	62.2561	64.1846	58.6569	41.3191	48.7919	53.7763	51.3631	45.1342	44.9583
	ENSMUSG00000017817.12	Jph2	0.423842	5.43083	42.7404	1.07768e-06	8.88165e-06	45.0585	51.3473	43.3562	50.4275	50.5059	52.8409	38.791	36.8688	30.9993	37.8551	36.5538	37.6414
	ENSMUSG00000057789.15	Bak1	0.423555	5.22555	86.7795	2.58779e-09	5.93795e-08	43.7525	40.3101	44.7905	45.2135	41.9129	42.9111	32.4844	30.1987	33.0313	30.6914	33.3799	33.2784
	ENSMUSG00000020773.12	Trim47	0.423474	4.78005	42.0321	1.22494e-06	9.92035e-06	31.541	31.398	39.3139	31.3615	31.1278	30.7825	23.2692	23.1377	23.8166	26.337	24.692	24.6336
	ENSMUSG00000020132.11	Rab21	0.423289	6.5757	107.779	3.33233e-10	1.09234e-08	116.434	116.68	118.92	119.921	106.711	106.178	81.1702	82.9243	90.4699	86.8303	83.0867	86.2853
	ENSMUSG00000078317.7	F8a	0.42288	3.31811	37.4833	2.89017e-06	2.04885e-05	12.4727	11.1058	11.2139	11.4396	10.8728	13.0506	7.72014	8.64914	9.28563	9.03653	8.90311	8.75319
	ENSMUSG00000004931.12	Apba3	0.422491	4.94471	59.1618	7.77274e-08	9.90854e-07	32.6511	33.7288	37.2276	35.7195	31.9169	38.1589	25.7972	26.5338	27.3371	25.1431	25.0148	26.4764
	ENSMUSG00000059796.17	Eif4a1	0.42208	8.02846	117.196	1.47736e-10	5.71255e-09	319.654	312.06	328.855	291.748	306.894	278.603	240.004	229.495	227.061	216.783	226.182	232.217
	ENSMUSG00000036398.14	Ppp1r11	0.42146	5.26066	83.9591	3.51094e-09	7.6726e-08	44.7973	45.9315	44.1385	44.2018	38.844	46.1028	32.5931	32.0067	32.0626	32.1429	32.9496	35.5548
	ENSMUSG00000022507.7	1810013L24Rik	0.421058	5.94189	36.2212	3.71099e-06	2.55088e-05	71.1794	76.3012	79.1495	69.9603	67.1659	71.4239	48.9848	53.5807	57.6985	56.6539	55.2208	53.0069
	ENSMUSG00000042485.8	Mustn1	0.421036	5.0149	30.6955	1.18808e-05	6.84243e-05	32.7817	30.781	34.6849	42.8011	38.9316	41.6344	29.6573	26.7293	22.8006	30.4339	27.7583	27.9398
	ENSMUSG00000002249.22	Tead3	0.420661	5.35035	58.4262	8.64035e-08	1.08091e-06	41.271	49.085	46.6812	47.3147	47.6124	49.2236	35.5561	37.0398	35.4177	36.4505	29.937	35.5548
	ENSMUSG00000024360.9	Etf1	0.420643	6.76857	125.914	7.29736e-11	3.16564e-09	133.739	134.641	129.025	131.205	127.317	121.853	93.6747	96.802	103.158	94.3451	94.0878	99.0222
	ENSMUSG00000046169.11	Adamts6	0.420587	2.72726	40.0665	1.76119e-06	1.34038e-05	8.42398	8.43221	8.01926	8.0933	8.76839	9.36241	6.68716	6.10815	6.33218	6.53159	6.37473	6.12452
	ENSMUSG00000034201.14	Gas2l1	0.420539	6.42599	92.674	1.4021e-09	3.62241e-08	94.1658	95.6336	106.728	98.8316	91.9804	98.3053	74.918	77.4758	72.4184	76.5062	66.5716	69.7274
	ENSMUSG00000033885.16	Pxk	0.419726	6.28308	88.5531	2.14465e-09	5.11636e-08	97.5615	100.912	98.5782	93.5398	96.1892	81.07	69.6715	71.7097	73.6707	70.0916	68.7503	70.6217
	ENSMUSG00000028232.14	Tmem68	0.419619	3.92452	29.0592	1.7176e-05	9.40448e-05	16.9133	16.933	18.5812	18.5212	17.8875	15.5331	12.4773	13.1936	14.9799	12.314	12.2653	12.7368
	ENSMUSG00000028945.10	Rheb	0.419617	5.77019	163.689	5.20214e-12	3.6355e-10	65.8899	62.6588	64.8061	65.6024	68.4811	63.6928	46.3752	47.3015	52.5004	49.3029	47.6356	49.1859
	ENSMUSG00000018263.12	Tbx5	0.419565	6.07246	42.911	1.04516e-06	8.66691e-06	62.2983	77.4666	76.4764	76.7307	83.3874	79.5096	55.9982	53.9716	52.6658	60.7508	54.9249	62.3021
	ENSMUSG00000025980.15	Hspd1	0.419209	6.81053	49.533	3.37486e-07	3.37583e-06	146.342	116.885	130.72	122.489	131.877	120.789	85.9273	97.3395	106.915	90.4589	99.8439	94.6862
	ENSMUSG00000024429.10	Gnl1	0.418794	5.89223	99.0167	7.50374e-10	2.16294e-08	71.963	74.0389	77.5195	72.9175	68.7442	66.6717	55.373	54.1671	55.6192	53.353	52.1275	52.492
	ENSMUSG00000018339.13	Gpx3	0.41879	10.1635	32.389	8.21177e-06	5.00717e-05	1320.87	1462.82	1386.88	1185.59	1175.05	1319.32	935.442	874.76	916.371	965.574	1012.59	1168.13
	ENSMUSG00000018559.17	Ctdnep1	0.418444	6.248	115.68	1.67776e-10	6.31933e-09	85.1541	86.2416	96.6875	83.6567	87.6839	87.9499	66.192	64.5509	69.2996	61.3126	67.4054	65.9064
	ENSMUSG00000066278.7	Vps37b	0.41827	4.72516	52.6055	2.06939e-07	2.264e-06	32.3899	36.1282	31.5555	31.5172	29.2864	26.385	24.6012	23.4797	23.5803	24.2301	20.8187	23.4954
	ENSMUSG00000053931.12	Cnn3	0.418193	7.55733	94.3214	1.18808e-09	3.15356e-08	212.755	211.971	220.693	223.266	224.997	217.96	166.255	159.081	170.685	163.664	157.566	164.251
	ENSMUSG00000022623.18	Shank3	0.41803	8.07874	30.7405	1.1763e-05	6.78131e-05	243.969	299.378	350.109	319.14	317.153	313.073	212.956	222.141	274.481	224.907	214.508	230.103
	ENSMUSG00000027333.19	Smox	0.417558	4.52533	53.4319	1.82057e-07	2.0261e-06	27.231	28.4501	27.448	24.9024	26.0421	28.2291	19.7353	19.6438	20.9104	20.6014	20.5229	20.1621
	ENSMUSG00000023348.12	Trip6	0.417234	4.9792	71.4669	1.50737e-08	2.53982e-07	34.7408	36.5396	39.6399	38.0541	36.3011	38.7263	28.3253	28.6106	27.0063	27.648	25.6334	30.5413
	ENSMUSG00000034684.13	Sema3f	0.416952	7.88757	62.3951	4.93628e-08	6.77292e-07	241.357	265.032	268.091	266.845	256.212	280.731	199.147	187.496	213.073	183.657	192.479	206.283
	ENSMUSG00000022403.16	St13	0.416768	6.53603	82.498	4.12535e-09	8.78232e-08	110.099	106.739	107.249	106.769	105.308	98.66	79.8654	77.7445	86.5004	77.0446	78.003	76.3939
	ENSMUSG00000025007.14	Aldh18a1	0.416588	4.11139	49.3758	3.46232e-07	3.45025e-06	20.7661	22.5544	20.6023	19.1438	17.8875	18.2993	14.2714	14.8062	14.2474	14.5146	16.3537	15.2842
	ENSMUSG00000029810.16	Tmem176b	0.416328	8.39985	66.9292	2.68733e-08	4.12538e-07	399.78	433.265	446.275	384.898	401.241	363.148	305.245	301.645	290.501	289.59	306.902	326.063
	ENSMUSG00000002504.16	Slc9a3r2	0.415977	8.75568	46.9843	5.14706e-07	4.8252e-06	419.501	480.979	535.921	489.956	494.186	503.017	372.769	363.166	390.492	381.875	321.346	361.509
	ENSMUSG00000029430.14	Ran	0.414845	6.71103	91.7839	1.53489e-09	3.85692e-08	125.446	120.519	128.504	116.108	120.828	108.732	86.172	96.4599	91.4622	88.0711	89.6766	88.372
	ENSMUSG00000030245.11	Golt1b	0.41482	4.9404	53.9825	1.67296e-07	1.88956e-06	36.1121	35.7855	39.4443	35.6416	31.2155	34.7544	25.5254	26.4849	28.8729	26.8287	25.2837	26.8829
	ENSMUSG00000051223.15	Bzw1	0.414746	7.13761	49.788	3.23805e-07	3.2603e-06	166.194	166.519	158.299	162.333	173	157.175	115.585	123.776	136.402	126.886	116.547	118.453
	ENSMUSG00000016528.11	Mapkapk2	0.414588	7.48558	156.84	8.04825e-12	5.17909e-10	208.053	212.93	218.737	203.5	205.969	216.328	164.107	162.037	156.013	153.832	155.656	157.856
	ENSMUSG00000020349.5	Ppp2ca	0.414487	7.40761	73.0202	1.24472e-08	2.15771e-07	196.102	196.82	202.307	184.745	201.322	184.269	131.161	140.341	163.361	153.364	141.159	145.064
	ENSMUSG00000075600.4	Zc3h3	0.414156	4.66322	37.334	2.97603e-06	2.10287e-05	23.8353	30.2325	31.4903	29.416	29.8125	30.9953	22.1003	23.1132	22.6588	20.6014	21.8409	21.5442
	ENSMUSG00000026502.14	Desi2	0.413986	4.90217	67.5566	2.47654e-08	3.83216e-07	35.1326	33.7288	33.4462	36.4977	36.4765	32.201	25.0089	25.5565	28.0932	26.8287	25.5258	24.5794
	ENSMUSG00000040323.14	Gm15429	0.413587	3.65253	36.6028	3.43887e-06	2.39498e-05	13.4523	15.8361	13.4958	13.4629	15.6077	15.4622	11.3627	10.8481	10.656	11.9629	10.3018	10.3521
	ENSMUSG00000071076.9	Jund	0.413377	7.81299	30.9146	1.13186e-05	6.55765e-05	237.896	267.911	326.573	247.157	259.457	277.326	174.872	190.55	196.061	212.522	199.204	240.564
	ENSMUSG00000042363.15	Lgalsl	0.41306	5.61045	35.6582	4.15616e-06	2.81582e-05	52.5683	56.2147	53.2662	58.2095	51.5581	56.2454	41.5365	42.9281	41.8444	42.8182	37.1187	40.1075
	ENSMUSG00000022010.20	Tsc22d1	0.412846	8.09378	90.4523	1.75974e-09	4.31619e-08	278.122	309.729	336.483	319.763	334.952	338.324	238.074	248.602	233.7	247.077	234.789	237.854
	ENSMUSG00000017652.17	Cd40	0.412385	4.24366	46.6504	5.44594e-07	5.05169e-06	22.9864	26.0507	23.4058	20.8558	20.8688	21.8456	17.8596	17.8602	15.2398	17.7687	16.031	17.5606
	ENSMUSG00000048787.14	Dcun1d3	0.412365	4.55591	50.4072	2.93023e-07	2.99708e-06	27.4922	27.7646	27.1221	26.848	27.7081	25.8176	20.6595	21.3541	19.4455	19.3841	19.5815	21.8694
	ENSMUSG00000056216.10	Cebpg	0.411917	6.55136	55.8072	1.26959e-07	1.49597e-06	109.577	106.671	113.965	102.645	109.254	108.803	73.4773	84.5612	87.5637	88.352	76.0933	79.1581
	ENSMUSG00000022561.14	Gpaa1	0.411778	5.31758	76.4694	8.22607e-09	1.54585e-07	43.0341	48.8794	49.4847	42.5676	43.3158	42.9111	35.5833	35.3295	33.2676	32.3302	32.8689	33.8475
	ENSMUSG00000031627.10	Irf2	0.411614	6.41641	62.091	5.14777e-08	6.97529e-07	105.267	106.26	114.421	92.5282	99.6966	93.3404	76.1684	76.4496	82.6964	73.9544	77.9492	72.6542
	ENSMUSG00000038375.16	Trp53inp2	0.411289	7.87347	29.8014	1.45101e-05	8.15212e-05	252.785	228.492	243.903	259.297	262.876	309.953	189.823	202.864	171.89	195.971	188.633	221.784
	ENSMUSG00000039041.16	Adrm1	0.410492	6.1454	102.543	5.37558e-10	1.61908e-08	88.3539	83.2252	83.7785	83.501	73.9175	81.3537	60.7553	61.7901	65.2593	58.7609	62.3755	63.0067
	ENSMUSG00000049521.3	Cdc42ep1	0.410447	7.85217	38.4726	2.38473e-06	1.7437e-05	227.839	266.334	262.68	265.289	289.445	279.808	199.908	197.831	206.906	216.807	179.595	196.066
	ENSMUSG00000020211.16	Sf3a2	0.410088	5.51484	87.2498	2.46132e-09	5.70783e-08	53.4172	52.6499	54.1137	52.373	51.8212	52.4863	41.4822	40.2649	41.9389	39.3066	37.4953	37.9937
	ENSMUSG00000055452.7	Gm7353	0.410081	3.48359	33.8789	5.99057e-06	3.84362e-05	13.0604	10.4888	15.191	13.2294	12.3634	13.7599	9.29679	9.16223	10.8923	9.55157	10.0597	9.83718
	ENSMUSG00000074766.11	Ism1	0.409901	6.5343	41.092	1.45518e-06	1.14724e-05	89.6599	106.945	127.721	105.057	106.887	102.632	80.5994	79.1861	77.8764	74.844	76.7657	91.6782
	ENSMUSG00000024486.7	Hbegf	0.409575	5.98284	29.222	1.65485e-05	9.121e-05	86.003	74.6559	79.8666	77.2754	73.3914	66.0334	61.3534	58.4672	49.1689	58.0819	52.9883	64.3346
	ENSMUSG00000044456.17	Rin3	0.409207	6.86541	52.0066	2.27273e-07	2.44504e-06	117.544	121.89	153.54	129.648	137.751	125.967	104.168	98.3657	99.0939	99.3784	93.1733	97.9111
	ENSMUSG00000001504.11	Irx2	0.409199	5.76111	44.1528	8.38259e-07	7.21184e-06	54.6579	60.3965	65.6536	57.8204	59.0989	66.8136	46.8101	49.3783	47.3732	47.9685	39.6202	43.2782
	ENSMUSG00000028152.11	Tspan5	0.409001	5.21022	36.1297	3.77963e-06	2.59193e-05	41.8587	42.8466	49.5499	39.9996	43.1405	37.5206	32.4572	33.4482	31.3301	32.3536	29.0225	33.441
	ENSMUSG00000030189.16	Ybx3	0.408292	6.29317	122.308	9.71903e-11	4.01635e-09	87.0478	88.5039	101.447	85.3687	86.7194	88.4464	65.7571	65.6748	70.5282	69.4127	65.2267	68.535
	ENSMUSG00000074781.6	Ube2n	0.407763	6.1076	97.8144	8.4262e-10	2.3739e-08	83.4562	81.6484	82.2137	76.6529	76.8111	74.6865	54.7749	59.2491	65.3774	61.0785	58.6906	59.2941
	ENSMUSG00000027952.17	Pmvk	0.407083	4.98554	34.3874	5.38979e-06	3.52164e-05	37.6141	29.9583	38.0752	37.665	38.844	37.5206	30.0379	27.6577	26.9118	26.8989	24.9341	29.1592
	ENSMUSG00000013150.16	Gfod2	0.406564	4.40354	41.7378	1.29245e-06	1.03803e-05	23.1823	25.5708	25.3617	22.2566	23.7623	24.9664	18.1043	18.8864	20.745	18.3306	16.031	17.3709
	ENSMUSG00000026005.16	Rpe	0.406018	4.68453	34.1707	5.63744e-06	3.6615e-05	33.1735	30.0269	29.8603	28.0931	29.3741	26.5978	20.9586	23.1621	23.9583	21.8188	21.7064	22.1133
	ENSMUSG00000037096.7	Gm9762	0.404911	3.16554	29.8332	1.44063e-05	8.09903e-05	10.7749	10.2832	9.584	10.4279	10.1713	11.2065	7.17647	7.45194	9.35651	7.84258	7.39684	7.9131
	ENSMUSG00000050705.16	2310061I04Rik	0.404894	4.42283	69.3103	1.97696e-08	3.21606e-07	26.7086	23.0343	27.0569	23.6573	26.919	23.6897	19.3275	19.8148	18.8075	19.2202	18.4249	18.482
	ENSMUSG00000031375.18	Bgn	0.404833	10.503	32.2744	8.41642e-06	5.11407e-05	1474	1662.38	1781.71	1618.81	1554.46	1667.22	1039.5	1216.04	1235.46	1170.65	1205.66	1503.65
	ENSMUSG00000038187.15	Btbd10	0.404335	4.29295	44.4382	7.97296e-07	6.92433e-06	21.0273	23.1714	22.6886	22.6457	21.4826	23.5479	16.283	17.2739	18.4767	17.6283	16.8648	15.1216
	ENSMUSG00000052681.9	Rap1b	0.404297	7.60425	36.2403	3.69682e-06	2.54516e-05	239.006	246.728	241.165	217.118	218.684	204.555	163.999	172.274	196.321	174.503	162.811	163.275
	ENSMUSG00000032745.19	Gpbp1	0.403009	6.20917	30.8263	1.15416e-05	6.67134e-05	91.619	90.9033	79.7362	84.6683	86.3686	80.9281	57.3574	66.0658	74.4031	67.2355	63.3976	60.3509
	ENSMUSG00000031770.17	Herpud1	0.402921	7.42611	29.2657	1.63844e-05	9.05062e-05	166.259	202.579	239.665	205.912	210.441	198.526	145.758	141.465	169.457	148.658	156.006	163.872
	ENSMUSG00000004446.13	Bid	0.402883	3.60927	35.2446	4.52013e-06	3.02365e-05	14.6277	14.8078	16.2993	14.9415	14.2048	14.1145	12.287	10.8725	12.6407	10.2773	11.7005	9.56618
	ENSMUSG00000030203.18	Dusp16	0.402063	6.13007	78.514	6.47931e-09	1.27387e-07	84.0439	78.4949	74.6508	85.68	90.139	77.2399	64.0174	64.0623	65.85	58.6204	59.9547	58.2643
	ENSMUSG00000047368.5	Abhd17b	0.402033	4.71389	52.1869	2.2093e-07	2.38711e-06	28.4718	33.3861	29.9907	25.8363	29.6372	31.1371	21.3119	22.5269	23.982	23.7853	21.6795	21.7881
	ENSMUSG00000040451.19	Sgms1	0.401828	6.71965	85.9273	2.83528e-09	6.38853e-08	112.124	130.116	128.178	118.52	124.248	122.704	87.5855	95.2872	93.7777	93.0809	89.3807	97.8569
	ENSMUSG00000034640.10	Tiparp	0.401227	5.36434	31.625	9.68627e-06	5.76515e-05	50.8051	44.4919	50.6583	51.05	49.9798	41.3507	35.1756	33.5948	37.7096	40.5005	34.3213	36.9368
	ENSMUSG00000026202.14	Tuba4a	0.400583	5.75477	40.5035	1.62301e-06	1.25515e-05	69.155	54.638	58.3515	61.9448	67.6043	62.3452	45.315	46.031	49.1217	43.6375	48.4426	50.7035
	ENSMUSG00000046768.14	Rhoj	0.39913	6.66647	81.4071	4.66005e-09	9.6746e-08	109.185	118.531	117.877	117.742	111.095	123.201	84.1604	83.6572	92.5964	85.5193	87.9551	95.174
	ENSMUSG00000037992.17	Rara	0.398554	6.26567	52.0746	2.24857e-07	2.42354e-06	78.5585	82.8824	94.7968	94.4737	92.3311	88.3755	65.0503	67.6783	73.6943	71.0749	58.9326	66.5026
	ENSMUSG00000004947.16	Dtx2	0.398245	4.47489	39.2088	2.07115e-06	1.54728e-05	25.8597	22.623	24.8402	24.2799	27.0943	27.307	19.7081	19.0574	18.9493	18.1901	20.0387	19.3492
	ENSMUSG00000024778.14	Fas	0.398143	5.51328	54.2609	1.60332e-07	1.82152e-06	49.4338	57.5172	57.178	53.229	50.4182	53.6211	42.488	38.9944	41.041	37.9019	41.8258	41.7606
	ENSMUSG00000030545.10	Pex11a	0.397942	4.58433	29.0825	1.70847e-05	9.36623e-05	28.6024	25.4337	29.9255	28.0153	27.5327	28.0163	20.6052	19.8881	21.4302	19.9927	22.5133	22.7637
	ENSMUSG00000045252.12	Zfp574	0.397905	5.23244	44.7821	7.50793e-07	6.55668e-06	35.9162	44.3548	47.1376	42.4898	42.3513	44.2587	32.3213	31.5669	33.6693	33.1964	32.5461	31.3543
	ENSMUSG00000029126.8	Nsg1	0.396509	5.68982	41.3625	1.38446e-06	1.09939e-05	63.1472	66.635	63.8281	51.906	52.6103	52.699	49.8003	41.5843	46.2627	42.5138	42.5789	44.1183
	ENSMUSG00000022052.10	Ppp2r2a	0.396111	6.05811	101.017	6.20282e-10	1.82413e-08	74.118	78.2893	77.5847	77.7423	82.7736	75.2539	56.5691	57.9053	61.8569	60.1889	57.0498	60.2155
	ENSMUSG00000113949.2	Scamp4	0.395179	5.46968	68.2802	2.2555e-08	3.55961e-07	46.1033	51.3473	47.594	52.2173	51.2074	50.2166	39.3347	37.0643	38.2766	38.019	36.3656	37.9395
	ENSMUSG00000037185.10	Krt80	0.394546	8.05001	53.3216	1.85182e-07	2.05563e-06	307.181	311.855	291.106	267.779	300.23	264.985	229.837	206.871	232.424	214.676	220.883	221.404
	ENSMUSG00000090000.3	Ier3ip1	0.394132	4.84137	40.5829	1.59919e-06	1.24168e-05	33.4347	36.471	35.7281	32.8401	29.9879	30.6406	23.1876	24.9946	28.0459	25.1431	24.9072	25.3382
	ENSMUSG00000068856.4	Sf3b4	0.394075	5.70594	92.6146	1.41056e-09	3.63888e-08	58.1189	60.6022	63.3717	59.9993	61.2034	56.9547	45.2335	47.7657	47.9403	46.5639	44.381	42.1942
	ENSMUSG00000025940.7	Tmem70	0.393938	4.30484	46.3676	5.71389e-07	5.25484e-06	26.7739	24.1997	21.0587	21.4784	21.6579	20.5689	16.1742	16.1744	18.6421	17.1835	17.3758	17.8316
	ENSMUSG00000021939.9	Ctsb	0.393771	9.28652	51.7604	2.36253e-07	2.52297e-06	831.166	777.477	817.182	696.879	708.661	659.057	546.309	578.369	544.426	550.947	580.961	617.032
	ENSMUSG00000001247.17	Lsr	0.393479	5.60951	76.605	8.0957e-09	1.52793e-07	55.8987	55.3235	57.9604	55.4858	60.1511	53.5502	43.1132	44.394	41.2301	43.263	40.9112	44.606
	ENSMUSG00000009293.18	Ube2g2	0.39343	5.90099	85.3589	3.0146e-09	6.74078e-08	67.849	65.8809	69.4351	66.6919	65.9383	66.6008	51.8935	48.401	52.1696	51.2694	48.8998	53.7657
	ENSMUSG00000044562.13	Rasip1	0.393192	7.34889	44.7025	7.61285e-07	6.63803e-06	159.794	183.52	207.458	202.021	187.994	186.681	150.597	146.107	158.186	143.25	129.135	131.108
	ENSMUSG00000060166.7	Zdhhc8	0.393055	6.1601	70.3225	1.73931e-08	2.89425e-07	68.5673	79.866	84.8216	82.3337	76.6357	85.964	61.4893	62.4253	60.7937	63.3494	55.8932	60.1613
	ENSMUSG00000017009.4	Sdc4	0.392986	7.64339	98.817	7.64909e-10	2.19396e-08	241.03	243.711	246.511	226.612	228.592	212.569	177.971	178.847	173.993	182.088	163.161	189.454
	ENSMUSG00000030403.10	Vasp	0.39291	7.08167	80.9269	4.9189e-09	1.01396e-07	140.661	146.432	162.472	154.551	169.581	154.48	127.11	118.303	115.326	118.247	108.505	119.239
	ENSMUSG00000028098.14	Rnf115	0.392703	5.22889	38.0235	2.60111e-06	1.87674e-05	45.9727	43.6007	48.3112	39.9217	45.4203	41.4925	30.7175	33.5704	38.064	32.892	33.2185	33.1971
	ENSMUSG00000020397.16	Med7	0.392671	3.95874	36.4971	3.51201e-06	2.4362e-05	17.7622	20.155	18.5812	17.5095	19.0274	17.3772	15.0053	13.78	14.6255	13.8123	13.1529	13.7124
	ENSMUSG00000076432.14	Ywhaq	0.391804	7.78986	90.4119	1.76711e-09	4.32819e-08	254.874	251.595	254.269	245.834	245.164	241.508	184.522	195.021	196.463	198.429	179.515	184.169
	ENSMUSG00000029390.14	Tmed2	0.391341	7.56573	65.0304	3.45327e-08	5.04542e-07	226.795	216.632	227.864	220.542	221.139	203.774	155.028	164.089	182.972	167.527	165.313	168.966
	ENSMUSG00000070372.12	Capza1	0.391077	7.04341	89.2481	1.99412e-09	4.80324e-08	151.697	147.049	146.368	147.703	155.113	144.337	108.463	116.592	118.469	117.498	109.393	109.889
	ENSMUSG00000014907.11	Naf1	0.390195	4.06264	37.8374	2.69699e-06	1.9371e-05	18.2193	18.7839	21.0587	19.922	19.8166	16.9516	13.32	15.7102	15.7596	14.0698	14.982	13.6582
	ENSMUSG00000022614.9	Lmf2	0.390057	6.45221	76.801	7.9111e-09	1.49795e-07	90.0517	97.8273	104.968	96.1079	95.137	105.256	74.6733	73.591	78.6561	74.2822	71.8704	76.692
	ENSMUSG00000041120.7	Nbl1	0.389667	8.22157	75.2954	9.45586e-09	1.72679e-07	321.352	325.291	360.15	339.452	322.238	334.635	262.648	271.422	232.212	257.658	234.789	270.319
	ENSMUSG00000031661.13	Nkd1	0.389349	7.52313	51.6013	2.42261e-07	2.57179e-06	188.985	193.392	214.499	191.827	201.41	229.095	158.915	147.206	157.856	149.711	149.578	167.611
	ENSMUSG00000053716.10	Dusp7	0.389132	6.98218	77.9407	6.9244e-09	1.34471e-07	135.437	141.976	152.04	148.325	149.589	152.636	109.251	104.352	121.044	116.819	101.135	119.266
	ENSMUSG00000030681.19	Mvp	0.389069	6.96064	52.8255	1.99974e-07	2.19468e-06	153.264	156.236	166.709	138.131	141.873	129.797	114.443	110.338	115.35	107.361	112.97	116.312
	ENSMUSG00000023186.15	Vwa5a	0.388899	6.49259	101.767	5.78043e-10	1.72022e-08	116.434	106.876	112.856	101.555	105.484	95.2555	79.2674	83.9749	84.3503	83.0378	78.8638	78.1825
	ENSMUSG00000026672.12	Optn	0.388516	4.52736	53.0128	1.94245e-07	2.1453e-06	29.8431	27.1476	28.4912	25.9141	24.9899	27.2361	21.3119	21.4518	20.5087	20.578	20.9801	20.2976
	ENSMUSG00000001240.14	Ramp2	0.388475	8.50166	56.0172	1.23043e-07	1.4587e-06	379.536	384.659	452.208	417.816	437.28	417.975	339.007	282.245	327.36	331.589	298.483	323.028
	ENSMUSG00000027829.16	Ccnl1	0.388383	6.4944	58.8619	8.11443e-08	1.02393e-06	109.642	109.413	107.575	103.734	105.484	89.7941	80.9527	79.7725	80.31	80.7435	76.174	80.0524
	ENSMUSG00000026341.17	Actr3	0.388174	7.80699	67.0987	2.62854e-08	4.04581e-07	273.159	260.027	261.767	256.262	259.281	232.642	196.592	206.358	199.487	201.613	188.821	186.229
	ENSMUSG00000062031.14	Pgghg	0.387845	5.49318	72.3313	1.3545e-08	2.31808e-07	52.503	54.9807	57.83	56.3418	57.3453	47.0958	43.684	42.6838	39.4816	41.5072	42.0141	39.7823
	ENSMUSG00000028889.18	Yrdc	0.387217	4.15729	64.5569	3.67925e-08	5.32468e-07	22.5946	22.1431	22.3627	22.1009	19.6412	19.576	16.6092	16.7852	16.3266	15.9895	16.1655	16.3953
	ENSMUSG00000049295.18	Zfp219	0.386873	5.94061	75.2015	9.56244e-09	1.73708e-07	64.9104	69.5828	70.8042	68.0148	64.8861	71.4948	50.5343	55.3643	52.6422	54.149	48.3081	52.3565
	ENSMUSG00000022462.8	Slc38a2	0.386813	6.97928	48.7742	3.82058e-07	3.76424e-06	138.898	138.617	145.455	136.03	156.954	143.273	107.076	121.625	113.743	111.294	95.5134	107.721
	ENSMUSG00000020048.14	Hsp90b1	0.386789	9.39127	60.7169	6.23412e-08	8.21744e-07	750.91	728.46	732.035	725.439	804.412	707.571	566.234	569.793	570.487	555.747	575.151	565.082
	ENSMUSG00000021591.9	Glrx	0.386714	5.21253	58.6606	8.35295e-08	1.04947e-06	41.7934	41.6811	45.3773	42.4898	43.9296	39.1519	30.9621	33.8636	29.6289	32.2131	30.5557	37.3704
	ENSMUSG00000027459.17	Fam110a	0.386695	4.86957	43.6029	9.23809e-07	7.79783e-06	27.884	30.8495	31.8163	35.2525	33.0568	35.6765	24.7371	25.6542	25.9194	26.618	21.4105	24.2813
	ENSMUSG00000025034.10	Trim8	0.386	7.17826	57.7924	9.47265e-08	1.16088e-06	148.432	157.95	175.902	165.368	154.324	176.822	123.305	119.915	126.313	136.859	115.579	127.07
	ENSMUSG00000004642.14	Slbp	0.385192	4.73257	38.7211	2.27347e-06	1.67428e-05	30.1696	32.4948	29.1432	27.9374	28.4973	31.4208	24.0031	24.6525	23.2259	21.9826	21.5719	22.1946
	ENSMUSG00000033998.10	Kcnk1	0.385071	3.98465	31.9424	9.04145e-06	5.42581e-05	17.4357	19.6751	20.2111	19.922	19.4658	16.8098	14.217	14.4885	14.2238	14.2805	13.1798	16.5037
	ENSMUSG00000027669.15	Gnb4	0.384403	5.70451	42.2084	1.18635e-06	9.68577e-06	57.5965	64.0985	64.3497	60.3884	63.3078	64.7567	44.6898	44.1253	49.5233	48.7177	48.846	50.9745
	ENSMUSG00000030339.8	Ltbr	0.384317	6.62552	91.8528	1.52414e-09	3.84318e-08	103.373	109.961	115.334	115.407	117.584	121.144	86.9603	87.1755	86.9021	85.4256	85.3461	91.2175
	ENSMUSG00000020922.12	Lsm12	0.383855	4.77699	43.1269	1.00553e-06	8.37014e-06	37.1569	34.2773	32.6638	28.7935	30.8647	28.0163	26.4225	23.4064	25.4705	23.2702	25.2568	23.3057
	ENSMUSG00000030595.16	Nfkbib	0.383259	4.48075	40.7643	1.54617e-06	1.20427e-05	30.1043	26.462	27.3828	24.7468	23.587	24.1153	19.4635	19.6927	20.6977	19.782	21.2491	19.1866
	ENSMUSG00000039988.15	Ankrd13c	0.383234	5.51969	38.19	2.51849e-06	1.82392e-05	51.5234	52.17	49.6803	53.0733	53.5749	53.1955	37.0241	40.7536	44.8923	42.7714	37.3608	37.1807
	ENSMUSG00000015094.17	Npdc1	0.382175	6.38344	51.1734	2.59258e-07	2.7269e-06	102.459	94.0568	96.2311	86.7695	82.2475	95.4682	77.1742	74.3728	69.0633	70.9578	68.1854	68.0744
	ENSMUSG00000025024.8	Smndc1	0.381693	5.11522	44.397	8.03076e-07	6.96065e-06	45.3197	40.9956	39.5747	42.8789	38.844	35.4637	31.3699	30.1987	33.1731	29.3804	30.2598	32.2486
	ENSMUSG00000031601.17	Cnot7	0.381176	5.37863	36.203	3.72457e-06	2.55921e-05	49.3032	49.9077	46.7464	48.3263	43.8419	45.3226	30.6087	37.3575	41.1828	37.5039	35.6662	35.338
	ENSMUSG00000006736.10	Tspan31	0.38106	6.02293	92.0091	1.50006e-09	3.79675e-08	73.1385	73.0106	80.7794	68.9487	73.5668	70.9983	56.0798	55.5842	55.9737	57.2158	55.678	57.7494
	ENSMUSG00000079659.6	Tmem243	0.381025	6.34319	44.3688	8.0705e-07	6.98815e-06	94.3617	99.1984	98.1871	96.3414	89.6129	93.3404	69.889	72.4915	72.1585	78.7068	70.7407	74.5783
	ENSMUSG00000004771.13	Rab11a	0.380497	6.51846	49.0633	3.64362e-07	3.60007e-06	103.7	105.231	110.053	103.968	96.0139	99.7948	74.3471	79.1128	89.194	81.9609	74.7215	76.0417
	ENSMUSG00000004460.18	Dnajb11	0.380331	6.30639	85.9813	2.81886e-09	6.36762e-08	92.272	93.6455	92.3193	86.6138	91.1036	88.8011	68.0677	70.8057	70.5991	68.8977	69.4765	70.703
	ENSMUSG00000028538.13	St3gal3	0.379685	4.36135	39.6645	1.8997e-06	1.43044e-05	24.8148	20.9091	21.7759	23.0348	20.9564	24.1153	19.5722	18.0313	16.5157	16.6216	16.1117	17.4522
	ENSMUSG00000015202.14	Cnksr3	0.379544	4.44932	37.5293	2.86423e-06	2.03543e-05	24.4883	24.9538	26.2093	23.9686	25.1653	25.1083	19.3547	20.4501	20.556	17.8155	18.1559	18.8885
	ENSMUSG00000071497.5	Nutf2-ps1	0.37908	4.09501	32.5629	7.91147e-06	4.84609e-05	19.0682	17.6185	18.6464	19.6885	18.3259	21.7038	13.4831	14.4152	15.4288	13.7187	15.1165	16.314
	ENSMUSG00000025287.16	Acot9	0.378819	5.18902	55.9217	1.24807e-07	1.4756e-06	42.0546	42.3667	43.8126	42.8011	44.105	36.7404	31.5873	34.3278	34.7089	31.2299	31.2281	30.5413
	ENSMUSG00000042178.7	Armc5	0.378623	5.36788	58.2221	8.89938e-08	1.10303e-06	43.0994	48.7423	53.0054	48.1707	45.6833	42.4855	37.8124	36.4046	38.631	35.4438	33.891	34.1185
	ENSMUSG00000001017.16	Chtop	0.378473	6.99726	63.5844	4.19545e-08	5.9287e-07	146.995	159.252	146.498	139.065	139.856	140.933	110.556	116.544	118.516	115.719	104.954	105.011
	ENSMUSG00000029840.9	Mtpn	0.378349	7.26889	31.3646	1.02528e-05	6.03243e-05	180.887	180.298	170.817	179.142	166.599	173.276	120.913	138.289	148.806	142.384	128.382	129.78
	ENSMUSG00000029364.16	Wsb2	0.378106	6.37185	81.6005	4.56003e-09	9.49399e-08	88.158	96.2505	96.6223	92.5282	96.4523	91.6382	73.6404	76.9627	70.4573	72.5966	66.9212	71.516
	ENSMUSG00000047777.10	Phf13	0.378095	4.67766	48.1287	4.25033e-07	4.10645e-06	27.0351	31.7407	29.6647	30.0386	28.5849	28.4419	23.5682	23.4309	22.3044	22.685	20.4153	22.6282
	ENSMUSG00000021610.9	Clptm1l	0.377728	6.62196	91.8054	1.53153e-09	3.85403e-08	114.018	107.493	111.748	106.458	126.703	111.994	88.0477	87.371	90.1863	85.3086	85.2116	85.8517
	ENSMUSG00000029718.15	Pcolce	0.37768	7.40759	36.1564	3.7595e-06	2.57966e-05	183.891	182.218	198.982	186.146	184.487	192.071	135.429	150.993	132.976	142.173	140.621	165.904
	ENSMUSG00000023367.15	Tmem176a	0.377578	8.32211	56.549	1.13699e-07	1.3665e-06	375.683	419.759	433.496	367.467	360.644	348.041	285.971	298.42	284.925	281.28	302.329	321.565
	ENSMUSG00000018736.15	Ndel1	0.376278	6.29408	83.505	3.69051e-09	8.00482e-08	83.195	89.1894	96.1659	85.4465	96.8907	89.3685	67.4153	67.8005	72.0876	69.9278	68.1316	70.7572
	ENSMUSG00000037553.15	Zdhhc18	0.37615	6.9503	95.1198	1.09736e-09	2.9336e-08	141.445	141.565	136.458	143.267	135.822	129.301	113.029	104.449	107.269	105.137	101.727	106.258
	ENSMUSG00000001576.16	Ergic1	0.376064	6.43275	73.0991	1.23277e-08	2.1434e-07	100.827	92.5486	102.62	91.8278	100.398	96.4612	74.8908	78.3554	73.6707	72.3625	72.247	79.0226
	ENSMUSG00000034412.14	Tbc1d10a	0.375871	5.3643	77.0701	7.66501e-09	1.4561e-07	41.7934	45.246	48.8979	45.9917	49.0153	46.5284	36.3173	34.5966	36.2447	37.2932	33.2454	36.0155
	ENSMUSG00000040659.4	Efhd2	0.375826	6.8147	50.4972	2.88817e-07	2.97325e-06	124.792	124.221	145.39	128.715	125.388	124.832	96.8008	95.6536	99.7791	101.181	98.2838	104.361
	ENSMUSG00000041028.17	Ghitm	0.375363	7.52375	67.2659	2.5719e-08	3.97266e-07	250.499	214.233	208.175	204.745	207.285	198.809	155.517	165.824	173.993	167.316	164.667	162.435
	ENSMUSG00000041355.14	Ssr2	0.375325	6.46924	64.5076	3.70367e-08	5.35115e-07	93.578	94.948	102.62	101.711	105.133	111.143	82.3119	77.769	75.7027	78.3322	75.0443	80.3505
	ENSMUSG00000020116.8	Pno1	0.375313	3.97585	38.259	2.4851e-06	1.80348e-05	19.1335	18.0298	18.842	16.4979	20.1673	16.2424	12.8307	14.684	13.7985	13.8591	14.3633	14.3899
	ENSMUSG00000029860.17	Zyx	0.374069	8.38567	49.6244	3.32509e-07	3.33254e-06	379.863	388.841	419.675	388.634	420.444	346.055	314.215	302.109	296.998	297.784	300.419	296.66
	ENSMUSG00000040158.13	Tax1bp3	0.373925	6.85779	69.8899	1.83685e-08	3.02197e-07	118.785	129.637	135.089	134.162	133.104	138.663	106.587	106.526	98.0071	104.505	94.5451	98.9409
	ENSMUSG00000022744.13	Cldnd1	0.373698	5.5665	53.5076	1.79948e-07	2.00646e-06	50.2827	56.4204	56.1348	48.482	49.103	50.0038	37.5677	42.3906	43.2384	39.8918	38.5443	38.0479
	ENSMUSG00000070730.12	Rmdn3	0.372708	4.98193	42.3057	1.16562e-06	9.5299e-06	40.9445	37.2251	39.7703	35.1747	32.3554	33.3359	28.9777	28.6594	30.6686	27.8353	27.7852	25.2569
	ENSMUSG00000070871.11	Ccnyl1	0.372142	4.46433	41.0929	1.45494e-06	1.14724e-05	25.0107	27.4218	26.0789	25.2137	24.2008	23.9025	20.4692	20.9632	20.0834	20.6014	17.7524	17.4522
	ENSMUSG00000033953.11	Ppp3r1	0.371973	6.23731	30.4903	1.24347e-05	7.11725e-05	86.9825	88.9838	87.2991	84.9018	85.4918	84.971	60.1573	66.5055	75.679	68.5934	63.4783	66.3129
	ENSMUSG00000022285.18	Ywhaz	0.371929	8.70565	115.805	1.66008e-10	6.26626e-09	488.526	476.454	477.113	468.866	472.704	445.708	363.635	378.705	367.857	371.106	349.212	355.873
	ENSMUSG00000016559.15	H3f3b	0.371654	8.86998	41.568	1.33324e-06	1.06653e-05	624.681	604.377	595.381	556.725	515.318	485.072	451.275	413.668	449.065	428.486	425.977	445.329
	ENSMUSG00000035890.10	Rnf126	0.371282	4.74113	51.1168	2.61602e-07	2.74163e-06	28.9289	31.8779	31.3599	28.0931	28.5849	32.0592	21.5294	23.9195	25.4941	23.7853	22.6209	22.5469
	ENSMUSG00000071180.6	Smim15	0.371191	5.51063	36.6506	3.40633e-06	2.37517e-05	52.5683	52.9241	53.201	54.3185	52.0842	45.6772	39.389	40.2649	41.6554	40.9921	37.6835	40.243
	ENSMUSG00000017776.16	Crk	0.370932	7.40232	71.9938	1.41209e-08	2.39348e-07	187.548	198.123	195.657	195.406	190.712	193.49	135.619	152.411	168.134	150.156	142.503	148.858
	ENSMUSG00000037966.16	Ninj1	0.370902	4.62378	34.6321	5.12441e-06	3.3697e-05	28.8636	28.3816	30.1211	27.6262	25.253	30.3569	22.3449	21.1098	21.8319	20.8823	23.5085	22.4114
	ENSMUSG00000070473.5	Cldn3	0.370645	6.74796	41.5597	1.33525e-06	1.06765e-05	107.161	115.309	133.589	122.178	120.653	130.648	94.8707	101.591	95.0772	97.9504	80.8273	93.8732
	ENSMUSG00000017679.17	Ttpal	0.370521	5.44508	46.4206	5.66259e-07	5.21382e-06	53.5478	47.9882	45.6381	50.0384	51.2074	51.9188	41.0744	38.3348	38.1821	37.1762	38.0332	39.4842
	ENSMUSG00000070493.4	Chchd2	0.369886	7.05296	88.2432	2.21573e-09	5.25001e-08	162.668	141.702	151.91	155.796	139.68	151.075	115.449	115.395	118.563	118.692	115.525	115.119
	ENSMUSG00000025198.17	Erlin1	0.369554	5.03276	47.7761	4.50701e-07	4.30672e-06	36.4386	35.1685	40.3571	35.6416	39.8962	37.3787	26.9661	28.7572	32.0862	28.5376	28.9956	28.6443
	ENSMUSG00000008140.19	Emc10	0.369504	6.42637	57.7235	9.56829e-08	1.17096e-06	90.6394	92.0687	97.4699	95.0184	96.6276	106.391	72.1453	73.6643	75.0175	75.0313	72.758	78.9142
	ENSMUSG00000020238.15	Ncln	0.369479	6.45437	52.5002	2.10365e-07	2.29572e-06	99.0634	101.598	105.815	91.1274	96.3646	89.7231	77.3645	75.6189	77.2857	77.4894	68.7772	75.3642
	ENSMUSG00000020671.10	Rab10	0.369127	7.03434	58.6091	8.41523e-08	1.05654e-06	157.248	150.477	151.844	146.769	153.447	137.103	107.783	116.372	125.699	118.411	109.957	116.149
	ENSMUSG00000051695.7	Pcbp1	0.369017	7.5546	66.0216	3.02749e-08	4.52949e-07	210.077	213.342	238.166	201.476	206.846	206.753	167.832	168.267	174.678	162.002	148.125	167.72
	ENSMUSG00000022200.9	Golph3	0.368918	6.90795	78.6854	6.35234e-09	1.25457e-07	133.543	131.762	137.436	132.061	143.012	142.138	98.0784	110.313	108.781	107.689	103.233	106.746
	ENSMUSG00000032554.16	Trf	0.368791	8.85285	44.7819	7.50828e-07	6.55668e-06	592.291	583.33	520.861	521.706	503.569	520.962	399.082	427.693	394.438	392.691	440.502	457.036
	ENSMUSG00000027787.15	Nmd3	0.368731	4.23162	65.7988	3.11797e-08	4.62366e-07	22.6599	21.1148	23.2754	20.4667	22.5348	20.9236	15.6849	16.8585	17.5789	17.5112	17.5372	16.2598
	ENSMUSG00000045665.6	Mfsd5	0.368704	5.41363	46.5169	5.57067e-07	5.14277e-06	44.3402	48.1938	45.7033	53.6959	49.6291	52.699	38.5192	36.8688	39.4816	36.9187	36.0428	39.9178
	ENSMUSG00000022247.13	Brix1	0.368684	4.44395	37.9319	2.64783e-06	1.90572e-05	27.5575	25.5708	23.0146	23.9686	27.7081	23.6188	18.947	19.4728	20.8868	19.0797	20.2808	18.5362
	ENSMUSG00000073775.5	Kti12	0.368616	4.16842	46.7532	5.35198e-07	4.97777e-06	20.8967	21.1833	22.1671	17.4317	19.5535	21.1364	17.2072	15.6613	16.5157	15.4042	15.6544	14.4441
	ENSMUSG00000003346.15	Abhd17a	0.368489	5.68556	47.9009	4.41432e-07	4.24373e-06	53.0907	56.9003	60.0467	58.3651	53.9256	66.9554	45.4238	47.1305	42.4823	48.7177	41.7989	45.0396
	ENSMUSG00000002603.16	Tgfb1	0.368225	6.24142	67.9756	2.34581e-08	3.6643e-07	79.734	83.7736	96.4919	81.3999	85.4041	93.4823	65.594	65.6504	68.7089	65.7607	66.0067	71.4347
	ENSMUSG00000032115.15	Hyou1	0.367993	7.02763	54.5033	1.54524e-07	1.76705e-06	149.411	135.258	148.259	145.135	146.081	131.428	110.583	110.142	118.587	105.652	112.809	105.147
	ENSMUSG00000047123.9	Ticam1	0.367903	4.5366	51.1314	2.60993e-07	2.73854e-06	25.8597	28.5187	29.5996	23.6573	26.4805	25.8176	20.7139	20.67	21.7137	20.5312	18.6938	21.6797
	ENSMUSG00000042423.10	Fbrs	0.367732	6.96353	92.5378	1.42159e-09	3.65113e-08	129.298	142.593	146.955	139.22	143.889	137.315	104.249	109.263	115.35	111.224	105.6	104.659
	ENSMUSG00000023224.13	Serping1	0.367623	9.40209	43.5399	9.34193e-07	7.86643e-06	783.039	788.788	922.541	753.61	804.85	699.84	593.445	581.374	593.453	591.518	654.983	668.928
	ENSMUSG00000051391.10	Ywhag	0.367614	7.28864	65.0079	3.46364e-08	5.0546e-07	206.224	177.419	186.986	175.484	176.332	165.686	134.233	138.337	147.53	132.926	140.97	149.509
	ENSMUSG00000022223.10	Sdr39u1	0.3675	4.6644	31.7961	9.33268e-06	5.57945e-05	26.1862	28.2445	27.448	27.1592	33.4076	29.5058	21.4207	22.307	20.7922	22.1231	22.6747	23.7935
	ENSMUSG00000022757.20	Tfg	0.36708	5.66355	79.924	5.51138e-09	1.11242e-07	60.4698	57.7229	59.3947	56.0305	55.5916	57.3802	42.2433	44.4918	49.0744	44.1058	43.6279	45.2564
	ENSMUSG00000036733.17	Rbm42	0.365923	6.04449	70.0572	1.79843e-08	2.9756e-07	76.4689	76.644	80.4534	74.2404	71.5501	70.0053	59.3418	59.2491	61.4316	56.8178	53.5262	58.4269
	ENSMUSG00000041319.15	Thoc6	0.365802	3.3032	29.0687	1.71387e-05	9.39288e-05	11.4279	12.0656	11.2139	9.96098	11.5743	10.2845	7.85606	9.01563	9.40376	8.35762	7.90789	9.07839
	ENSMUSG00000042165.9	ENSMUSG00000042165.9	0.365767	4.23754	40.1118	1.74631e-06	1.33219e-05	20.8314	22.2802	23.3406	21.4005	22.0087	22.484	16.1742	16.9074	18.8075	16.5514	17.1338	17.127
	ENSMUSG00000032000.18	Birc3	0.36558	5.73112	41.2043	1.42537e-06	1.12781e-05	68.1755	67.1149	63.6325	64.5907	63.4831	51.3514	49.5557	47.3748	46.9243	50.0053	49.2495	50.5951
	ENSMUSG00000023991.17	Foxp4	0.364943	6.49182	58.2259	8.89442e-08	1.10303e-06	95.6677	93.4398	102.946	103.423	100.223	105.327	79.2674	81.8248	77.6165	83.7635	66.7598	77.3695
	ENSMUSG00000021816.12	Ppp3cb	0.364809	5.58555	29.5858	1.52347e-05	8.48811e-05	56.6823	58.1342	56.0044	53.6181	50.8567	50.0038	40.9113	43.6366	45.105	43.38	39.8353	39.8365
	ENSMUSG00000078440.11	Dohh	0.364365	4.74806	29.5841	1.52408e-05	8.48882e-05	29.4513	32.3577	31.4903	28.1709	26.5682	31.7045	24.3565	26.0696	23.9347	23.1532	19.8235	22.4114
	ENSMUSG00000001891.17	Ugp2	0.364219	6.14594	56.6792	1.11531e-07	1.3423e-06	85.8071	84.1164	78.9539	78.0536	80.7569	81.7083	55.8079	62.4742	68.6144	61.6404	65.3343	66.3671
	ENSMUSG00000044030.5	Irf2bp1	0.363835	5.52839	69.7441	1.87105e-08	3.06665e-07	46.9523	56.009	54.3745	50.8166	51.9089	53.2665	40.5579	43.5633	42.7186	40.1962	36.9035	39.5113
	ENSMUSG00000044147.9	Arf6	0.363712	6.54719	49.549	3.36609e-07	3.36976e-06	113.952	104.888	116.181	107.781	99.1705	105.327	87.5312	86.1249	85.8152	85.9407	76.8733	80.9196
	ENSMUSG00000029713.16	Gnb2	0.363504	8.2801	83.5398	3.67638e-09	7.98411e-08	331.8	351.822	376.058	339.529	351.875	354.211	282.057	282.71	267.747	279.594	253.375	270.915
	ENSMUSG00000022508.6	Bcl6	0.363035	5.80467	31.2599	1.04906e-05	6.15153e-05	64.5839	59.7795	67.6747	66.3028	62.3432	57.593	52.4372	49.3539	50.0431	48.4367	48.2274	45.6358
	ENSMUSG00000037601.12	Nme1	0.36289	4.61995	45.2872	6.87761e-07	6.09135e-06	28.7983	26.3249	26.7309	26.3032	29.7248	25.6757	21.0129	21.9649	21.2884	21.8422	20.0656	20.9209
	ENSMUSG00000067787.11	Blcap	0.362607	5.58411	92.4474	1.43469e-09	3.66855e-08	56.8782	50.936	55.8088	50.2718	49.5414	53.6211	41.3734	44.0764	39.836	41.0155	40.8575	39.5926
	ENSMUSG00000040128.10	Pnrc1	0.362295	6.26773	32.172	8.60407e-06	5.20994e-05	82.3461	97.2103	92.0585	86.0691	74.3559	84.4036	67.0891	71.1966	70.5991	68.8041	65.4419	58.8063
	ENSMUSG00000034974.14	Dapk3	0.361942	4.88395	43.7891	8.93814e-07	7.58871e-06	34.2836	32.1521	35.4021	32.0619	29.7248	32.8394	26.9661	25.1167	25.6123	24.1598	26.4672	24.7149
	ENSMUSG00000041187.17	Prkd2	0.36191	6.58636	40.977	1.48644e-06	1.16714e-05	94.1658	100.569	115.269	105.057	111.183	110.647	83.8886	86.4914	90.7062	82.71	76.5775	75.0661
	ENSMUSG00000019579.14	Mydgf	0.361838	5.14723	54.3674	1.57752e-07	1.79454e-06	42.0546	40.7214	43.617	42.0229	37.3533	37.7334	30.6631	33.4727	30.4323	31.7449	30.9322	32.357
	ENSMUSG00000068735.15	Trp53i11	0.361838	5.93287	40.928	1.49998e-06	1.17512e-05	68.8285	72.8049	71.4562	73.6179	72.7776	65.8915	57.0855	57.5876	62.235	54.0085	47.0439	52.9256
	ENSMUSG00000004100.13	Ppan	0.361636	4.52286	34.0519	5.7784e-06	3.73497e-05	26.5127	25.5023	24.8402	27.9374	27.2697	24.0444	21.1217	19.1796	20.5087	19.5011	21.4643	19.6473
	ENSMUSG00000044279.16	Crb3	0.361535	4.66757	48.206	4.19617e-07	4.06313e-06	27.8187	31.398	32.729	27.7818	31.0401	29.293	25.3623	24.6036	22.1863	22.7786	21.007	24.2271
	ENSMUSG00000020538.16	Srebf1	0.361042	7.13306	45.7489	6.35149e-07	5.69186e-06	168.414	132.584	149.302	157.586	152.745	159.374	126.485	121.064	115.161	120.401	113.777	119.428
	ENSMUSG00000006356.11	Crip2	0.360781	8.95869	43.748	9.00343e-07	7.633e-06	514.712	523.208	571.649	562.951	557.406	595.506	470.14	440.031	408.355	453.723	396.551	420.804
	ENSMUSG00000048832.10	Vps37c	0.360744	5.38958	97.6248	8.58264e-10	2.40204e-08	47.2788	49.5649	50.2019	49.1823	49.9798	45.7482	36.6707	40.778	38.6783	36.4739	37.2532	37.4517
	ENSMUSG00000032553.15	Srprb	0.36004	6.03108	47.5987	4.64247e-07	4.41681e-06	70.4611	70.474	78.0411	73.6957	74.5313	73.1261	53.7148	55.0467	64.3851	55.4834	56.996	57.3971
	ENSMUSG00000001229.10	Dpp9	0.360037	6.40302	58.3484	8.73807e-08	1.09079e-06	91.9455	84.3221	101.056	95.0962	92.7696	93.1986	74.1568	76.2786	72.7728	74.3524	64.366	73.1149
	ENSMUSG00000020190.14	Mknk2	0.359954	7.84752	43.1332	1.0044e-06	8.36575e-06	233.521	240.352	246.837	271.592	277.87	282.362	202.953	186.958	198.566	204.212	196.326	220.51
	ENSMUSG00000004054.10	Map3k11	0.35986	7.10917	35.107	4.64879e-06	3.09547e-05	132.498	152.465	162.211	149.882	153.71	169.304	118.765	124.875	129.054	124.685	104.524	114.957
	ENSMUSG00000060073.10	Psma3	0.359822	6.48714	73.0888	1.23433e-08	2.14396e-07	106.704	103.997	106.793	101.555	112.323	94.5462	77.582	82.3134	85.2009	78.4961	77.7879	86.2853
	ENSMUSG00000025823.10	Pdia4	0.359693	6.98292	51.945	2.29482e-07	2.46083e-06	140.138	131.625	147.281	144.434	144.24	137.528	113.519	109.776	107.553	107.081	113.589	107.179
	ENSMUSG00000047030.16	Spata2	0.359642	5.06859	70.823	1.63342e-08	2.72585e-07	39.3119	39.0761	37.5536	33.5405	37.2657	38.2299	30.3913	28.3418	29.0383	29.0761	29.7218	28.8611
	ENSMUSG00000032300.8	1700017B05Rik	0.359476	5.03889	76.5589	8.13977e-09	1.53293e-07	35.0673	35.854	36.0541	37.0424	38.844	38.7263	28.7874	29.71	27.3371	30.9724	26.3865	29.4031
	ENSMUSG00000028426.11	Rad23b	0.359235	6.79573	30.4783	1.2468e-05	7.1282e-05	133.021	133.544	134.502	127.625	112.411	119.513	89.733	101.493	112.278	99.9403	90.7256	98.9409
	ENSMUSG00000042215.9	Bag2	0.359219	3.1751	31.1472	1.07535e-05	6.27612e-05	8.68519	9.52908	10.1056	10.2723	10.9605	10.4973	7.58422	7.42751	8.03337	7.07003	7.96169	8.67189
	ENSMUSG00000014867.10	Surf4	0.358335	7.61812	86.8248	2.57529e-09	5.91983e-08	220.591	222.459	240.447	219.219	229.995	211.718	165.331	171.59	181.436	167.831	178.143	184.413
	ENSMUSG00000020458.17	Rtn4	0.357998	7.39332	45.8511	6.24103e-07	5.61307e-06	212.167	199.082	211.174	183.733	177.034	178.099	142.986	148.428	163.432	155.915	146.915	148.615
	ENSMUSG00000050244.10	Heatr1	0.357939	5.13268	42.9807	1.03219e-06	8.5716e-06	40.2261	39.0075	42.8346	35.2525	40.9484	38.6554	32.2669	33.4971	29.9361	31.3235	30.9053	26.9642
	ENSMUSG00000039810.12	Zc3h10	0.35787	4.4692	48.3185	4.11875e-07	4.0015e-06	23.5088	23.7884	25.6225	25.8363	25.8667	25.3211	22.0731	20.108	18.5949	18.1199	18.909	19.1595
	ENSMUSG00000059811.14	Atl2	0.357796	5.48583	51.8816	2.31782e-07	2.47827e-06	50.0215	49.6335	49.1587	54.2406	55.5039	50.5003	37.6765	41.3644	42.6005	38.5574	41.1264	39.6468
	ENSMUSG00000020368.16	Canx	0.357392	8.14429	62.7114	4.72634e-08	6.52594e-07	325.205	317.407	307.992	325.911	301.545	315.13	231.278	241.076	269	243.916	247.404	245.116
	ENSMUSG00000026833.19	Olfm1	0.357146	5.32329	40.2039	1.71643e-06	1.31227e-05	48.6501	42.2981	53.8529	47.4703	45.0695	43.7622	38.3561	36.2336	37.426	33.1261	37.8449	36.6116
	ENSMUSG00000028645.12	Slc2a1	0.357138	4.95278	32.256	8.4499e-06	5.13084e-05	35.2632	34.003	36.2497	34.3965	34.3721	29.7186	30.201	25.8253	26.7464	24.9558	27.3011	24.2813
	ENSMUSG00000030811.15	Fbxl19	0.357084	4.86606	32.058	8.81826e-06	5.31932e-05	28.9289	31.4665	34.9457	33.307	33.5829	31.9173	24.3021	28.6839	27.1953	26.0561	21.4374	23.7664
	ENSMUSG00000031007.3	Atp6ap2	0.357028	6.06217	36.5833	3.45219e-06	2.40138e-05	76.3383	81.1686	82.1485	72.3727	74.7067	68.5158	54.7206	61.8145	66.1335	60.7274	54.1987	57.8849
	ENSMUSG00000019261.4	Map1s	0.357	5.62568	31.4239	1.01207e-05	5.97295e-05	50.4786	54.7751	58.9383	58.5986	51.2074	56.5291	40.3676	43.3434	47.515	44.3867	42.1485	40.2972
	ENSMUSG00000005103.13	Wdr1	0.356927	7.62985	135.394	3.54714e-11	1.77755e-09	229.864	217.798	221.214	222.643	231.398	214.91	179.765	180.801	170.993	171.507	167.868	173.628
	ENSMUSG00000069237.9	Fam8a1	0.356863	6.13409	29.8825	1.42474e-05	8.02263e-05	77.579	83.6365	85.278	74.863	76.1973	74.3319	52.274	60.544	71.0953	63.1153	60.6541	60.8387
	ENSMUSG00000044768.17	Macir	0.356682	4.68481	34.8332	4.91685e-06	3.24791e-05	29.0595	33.1804	31.0339	28.7156	30.8647	26.8105	21.8284	24.7747	24.3364	24.4642	23.2664	21.5984
	ENSMUSG00000048332.14	Lhfp	0.356483	7.85043	40.5063	1.62214e-06	1.25504e-05	235.284	266.334	260.528	269.413	257.44	287.114	199.093	196.658	205.347	218.024	196.89	214.982
	ENSMUSG00000001034.18	Mapk7	0.356399	5.40591	39.2706	2.04694e-06	1.53204e-05	44.7973	46.6856	48.8979	46.7699	49.8044	50.2875	39.0628	39.7518	39.1036	38.4638	34.8593	33.0074
	ENSMUSG00000086922.3	Gm13835	0.356283	4.51218	53.0495	1.93141e-07	2.13582e-06	26.1209	28.313	28.1652	26.6145	27.8835	23.1933	20.3605	19.3018	22.9423	20.8823	20.227	21.4629
	ENSMUSG00000023027.14	Atf1	0.355803	5.28584	47.1799	4.98026e-07	4.69972e-06	44.6667	48.1253	46.0293	45.8361	42.7897	38.6554	32.5659	35.5494	37.7804	35.1395	31.3088	35.609
	ENSMUSG00000024712.10	Rfk	0.355642	6.70046	48.015	4.3313e-07	4.17543e-06	126.099	119.833	114.16	104.279	116.883	116.321	82.9643	87.6886	99.6374	94.9304	91.2367	88.7514
	ENSMUSG00000057963.10	Itpk1	0.355573	5.09496	33.9026	5.96102e-06	3.82888e-05	44.1443	36.6767	35.5977	36.2642	36.5642	36.9532	30.6087	29.2458	28.0932	31.1128	26.8438	30.9749
	ENSMUSG00000045980.14	Tmem104	0.355481	5.05026	62.9649	4.56504e-08	6.34341e-07	34.9367	32.4263	40.2919	37.8206	37.8794	37.0241	27.8088	27.2912	30.4087	27.648	29.8832	29.1592
	ENSMUSG00000050721.10	Plekho2	0.35542	6.34649	31.3478	1.02906e-05	6.05255e-05	110.622	102.215	105.554	92.5282	97.4168	77.5945	76.1412	72.2716	78.1363	72.1752	80.6121	78.8329
	ENSMUSG00000026209.16	Dnpep	0.355039	5.3909	59.562	7.34085e-08	9.44079e-07	47.4094	44.8347	49.2239	45.6804	50.5936	46.3156	38.4648	37.5529	36.9535	35.912	35.2359	37.9124
	ENSMUSG00000029319.9	Coq2	0.354881	5.62969	50.4688	2.90135e-07	2.97639e-06	64.7798	57.6544	61.807	60.155	55.5916	49.6492	44.6626	43.4167	47.7749	45.2295	47.7163	44.7144
	ENSMUSG00000050428.8	Fbxo46	0.354837	4.10587	39.0159	2.14871e-06	1.59793e-05	18.154	19.9494	21.0587	17.3539	19.1151	20.4271	15.1413	15.5391	14.0584	13.4377	16.7841	15.8804
	ENSMUSG00000018565.18	Elp5	0.354507	4.78455	75.2225	9.53857e-09	1.7348e-07	29.7778	30.4382	31.4903	30.8168	32.6184	33.194	25.8788	24.9213	22.9423	24.8622	24.0734	24.5794
	ENSMUSG00000036478.9	Btg1	0.354464	7.12516	59.7999	7.09647e-08	9.19431e-07	170.961	174.677	158.69	157.119	163.794	150.437	130.78	127.538	126.478	133.16	123.164	122.03
	ENSMUSG00000019173.12	Rab5c	0.354231	7.69139	77.8834	6.97061e-09	1.35135e-07	242.989	256.051	269.395	225.834	224.821	230.727	194.852	181.07	188.784	185.998	186.589	197.096
	ENSMUSG00000044217.18	Aqp5	0.3542	8.15159	54.6677	1.50714e-07	1.72826e-06	320.568	333.381	339.547	324.277	321.712	318.322	263.327	264.556	229.518	275.123	225.752	273.354
	ENSMUSG00000063802.6	Hspbp1	0.353325	4.57026	37.4185	2.92711e-06	2.07251e-05	26.7739	25.8451	30.5775	27.6262	24.6392	24.6827	21.2576	20.9143	21.8082	20.3205	19.7159	21.4358
	ENSMUSG00000031750.16	Il34	0.353063	4.20229	36.1101	3.79457e-06	2.60014e-05	19.656	24.0626	20.9935	20.9336	18.7644	23.1223	15.3044	16.4187	16.7992	16.528	17.1876	17.6961
	ENSMUSG00000022220.15	Adcy4	0.352138	7.05457	31.6583	9.61635e-06	5.73136e-05	147.648	137.589	142.065	143.033	152.745	143.202	127.6	107.284	120.052	113.401	98.1224	112.111
	ENSMUSG00000021116.11	Eif2s1	0.3518	5.19359	34.8133	4.93698e-06	3.25874e-05	48.0624	39.2132	43.1606	46.6143	38.5809	37.3787	31.6689	33.3261	36.1029	32.6579	32.8689	31.7066
	ENSMUSG00000048920.9	Fkrp	0.351723	5.34879	88.7845	2.0932e-09	5.02109e-08	43.2954	45.6573	48.7675	45.8361	44.6311	48.4434	35.8552	37.4796	38.0404	36.2398	34.5096	34.6605
	ENSMUSG00000057554.14	Lgals8	0.351641	6.41126	53.7807	1.72549e-07	1.94009e-06	108.206	102.969	111.161	93.2285	98.8197	88.1627	81.0887	76.8161	82.4365	78.3088	74.856	78.86
	ENSMUSG00000042712.11	Tceal9	0.351547	6.18699	42.6676	1.0919e-06	8.9904e-06	80.6482	83.9107	94.0144	78.1314	84.2642	84.7582	64.7513	67.1164	58.9507	69.1786	62.9942	73.4672
	ENSMUSG00000015839.7	Nfe2l2	0.350902	7.58097	70.9121	1.61531e-08	2.69822e-07	221.766	226.504	242.99	212.138	235.256	202.072	175.416	175.793	184.295	168.182	169.159	178.397
	ENSMUSG00000007036.16	Abhd16a	0.350803	6.14293	75.2782	9.47533e-09	1.72845e-07	80.2564	84.2535	83.1917	77.2754	77.3372	78.5875	62.9844	63.085	64.1252	62.2725	59.363	65.3644
	ENSMUSG00000071533.12	Pcnp	0.350751	6.65869	44.1313	8.41441e-07	7.22852e-06	117.413	121.547	115.008	106.147	112.148	104.05	85.9273	86.6136	96.9202	90.5994	85.5344	84.7948
	ENSMUSG00000022551.9	Cyc1	0.349927	6.20161	29.6408	1.50463e-05	8.40024e-05	95.6677	78.7691	83.2569	78.2871	77.3372	89.3685	66.0561	63.4515	65.4483	63.958	69.0999	66.6381
	ENSMUSG00000073982.12	Rhog	0.34942	6.54157	48.5775	3.94633e-07	3.87283e-06	99.7817	94.2625	121.267	101.4	109.429	103.909	86.0633	84.6101	79.6012	81.0244	78.6755	84.5509
	ENSMUSG00000116048.2	ENSMUSG00000116048.2	0.34894	7.57061	34.9423	4.80804e-06	3.18573e-05	213.93	220.814	212.608	209.57	203.514	217.889	160.954	164.676	179.357	172.139	158.642	167.964
	ENSMUSG00000036275.14	9530068E07Rik	0.34868	7.7204	91.6757	1.55195e-09	3.88921e-08	223.007	242.135	258.181	232.916	242.358	250.657	185.881	190.916	188.028	193.63	186.535	193.112
	ENSMUSG00000005566.15	Trim28	0.348615	6.79175	72.9913	1.24913e-08	2.16321e-07	116.564	116.131	122.832	120.154	129.509	121.853	99.6822	98.5123	97.4636	91.1847	93.4692	90.54
	ENSMUSG00000019505.8	Ubb	0.348351	10.2732	75.6324	9.08359e-09	1.68162e-07	1402.04	1447.53	1541.52	1360.3	1368.13	1343.29	1170.28	1140.98	1095.02	1088.41	1054.41	1098.38
	ENSMUSG00000005779.13	Psmb4	0.348301	6.36679	64.9531	3.4891e-08	5.079e-07	101.676	99.4041	106.728	89.4932	92.2435	91.7091	79.2674	76.474	78.8688	73.416	71.9511	76.8004
	ENSMUSG00000052214.10	Opa3	0.348025	5.54446	48.3881	4.07165e-07	3.96901e-06	51.0663	45.5888	51.571	50.3496	56.7315	52.4153	42.4064	43.4656	40.3795	38.9086	38.3829	38.0479
	ENSMUSG00000061689.16	Dlgap4	0.347982	7.0155	76.3971	8.2966e-09	1.55575e-07	141.771	143.553	149.823	146.924	148.8	144.834	119.526	116.837	114.877	117.1	106.272	113.358
	ENSMUSG00000038387.10	Rras	0.347923	6.42776	82.2045	4.2623e-09	9.03162e-08	93.578	89.5322	101.838	102.956	99.6089	100.362	79.3217	73.6399	76.0807	75.4527	74.1029	83.2502
	ENSMUSG00000029474.8	Rnf34	0.347301	4.92172	49.6602	3.30583e-07	3.31705e-06	37.4835	31.8779	35.6629	34.0074	35.5997	34.187	27.7544	28.1708	26.5101	27.3203	28.0811	26.3138
	ENSMUSG00000031792.16	Usb1	0.347275	4.57341	33.879	5.99048e-06	3.84362e-05	29.6472	27.8331	32.0118	29.9608	26.8313	23.9025	20.877	21.574	20.9576	22.404	22.5133	25.555
	ENSMUSG00000041769.14	Ppp2r2d	0.347199	5.07714	43.3977	9.58114e-07	8.04029e-06	36.6345	38.2534	43.5518	35.4082	42.439	39.2938	29.3039	31.1271	30.9048	30.4807	31.7123	31.6253
	ENSMUSG00000038517.16	Tbkbp1	0.34715	6.39388	37.0393	3.15387e-06	2.21329e-05	85.0235	98.4443	100.599	97.4308	97.3291	92.2056	76.4674	71.221	87.2329	73.416	64.9846	75.4726
	ENSMUSG00000002108.11	Nr1h3	0.346981	5.61125	32.8227	7.48479e-06	4.62043e-05	52.6989	53.6782	58.2863	52.2173	54.6271	55.7489	41.4278	40.436	44.0417	40.7814	43.8969	46.774
	ENSMUSG00000000693.11	Loxl3	0.346965	4.38663	29.9689	1.3973e-05	7.89102e-05	24.8148	22.8972	24.1882	24.7468	21.3949	22.6968	18.3489	17.6159	17.13	16.6684	18.8821	22.1404
	ENSMUSG00000037253.9	Mex3c	0.346918	5.70028	56.5004	1.1452e-07	1.37353e-06	56.0946	57.0374	55.4829	57.6647	58.6605	63.0544	46.9461	46.2754	46.499	45.2295	42.3637	46.232
	ENSMUSG00000093661.2	Eif4e3	0.346871	5.58601	78.1214	6.78061e-09	1.32267e-07	55.3763	52.7184	59.9815	54.1628	57.6083	50.5003	42.053	40.4604	44.9396	43.8014	44.7038	43.766
	ENSMUSG00000042305.13	Tmem183a	0.346628	5.54225	69.0048	2.05546e-08	3.32208e-07	54.462	53.8153	52.875	50.8944	50.5059	53.692	41.5093	42.2195	44.4198	40.8283	38.3022	41.4896
	ENSMUSG00000010755.18	Cars	0.346388	4.66743	34.052	5.77826e-06	3.73497e-05	32.3246	31.8093	32.077	27.1592	28.5849	24.5409	23.5138	22.6002	24.8326	22.5913	23.0512	22.3572
	ENSMUSG00000017314.13	Mpp2	0.346228	4.56648	44.1103	8.44555e-07	7.24813e-06	24.0965	27.4218	23.0798	26.848	25.4283	27.5907	21.4479	19.3751	19.351	21.772	18.9897	20.5144
	ENSMUSG00000020346.17	Mgat1	0.34589	7.10833	58.9544	8.00733e-08	1.01409e-06	141.967	146.981	163.71	159.142	165.109	151.997	125.289	126.439	120.264	121.619	110.764	126.366
	ENSMUSG00000030588.13	Yif1b	0.345431	5.04518	31.4278	1.01121e-05	5.97174e-05	33.6306	34.0716	38.0752	36.4977	36.5642	42.6274	30.3097	30.6873	27.6442	28.444	28.619	28.5901
	ENSMUSG00000038500.16	Prr3	0.345397	4.39663	33.4219	6.59303e-06	4.16127e-05	24.0312	25.9136	25.2313	27.0036	23.4993	20.2852	21.0945	20.6455	18.1223	18.0028	18.9628	18.0755
	ENSMUSG00000025857.11	Dnaaf5	0.345371	4.85971	33.1378	7.00049e-06	4.37411e-05	30.039	34.5515	34.7501	31.595	29.9879	31.3499	24.1662	25.3122	27.8805	26.2668	24.6651	23.0889
	ENSMUSG00000028156.13	Eif4e	0.345244	5.62242	46.8863	5.2329e-07	4.88787e-06	56.617	57.86	55.2873	55.5636	58.0467	49.791	41.754	43.49	48.2711	42.3265	43.9507	42.3839
	ENSMUSG00000021583.8	Erap1	0.344987	6.3497	38.8411	2.22178e-06	1.63968e-05	97.8227	92.5486	91.2761	90.7383	95.2247	95.0427	65.1591	71.7586	85.8625	72.222	73.2691	74.6596
	ENSMUSG00000000001.5	Gnai3	0.344663	6.64575	51.0324	2.65139e-07	2.77204e-06	111.275	117.023	115.204	107.47	112.849	109.086	84.5682	90.4739	94.841	89.8503	86.5565	83.6025
	ENSMUSG00000037049.10	Smpd1	0.344629	6.73328	53.5986	1.77445e-07	1.98491e-06	120.613	124.015	128.243	115.252	108.903	121.215	93.0223	97.0952	92.0529	93.2682	92.4739	97.9111
	ENSMUSG00000026974.12	Zmynd19	0.343985	3.73778	34.0679	5.75926e-06	3.72951e-05	14.1706	13.4367	15.7125	16.1866	17.0107	15.1785	12.1239	12.4118	12.5935	10.8392	12.2384	11.9239
	ENSMUSG00000057367.13	Birc2	0.343691	5.68178	53.7832	1.72485e-07	1.94009e-06	61.0575	59.2311	63.5673	59.3768	58.9236	53.3374	43.4394	47.3993	49.925	47.1492	48.1467	44.0912
	ENSMUSG00000002968.10	Med25	0.343209	6.21304	72.8768	1.26675e-08	2.18607e-07	73.7915	79.3861	87.9511	81.5555	82.1598	90.0068	65.3494	65.4061	65.1648	64.7306	63.4783	65.9335
	ENSMUSG00000013701.14	Timm23	0.342787	5.33349	75.6655	9.0479e-09	1.67858e-07	46.6911	43.8749	46.0293	43.8127	48.4892	46.7411	37.1056	34.7676	36.2683	35.1395	36.258	37.7769
	ENSMUSG00000051675.14	Trim32	0.342439	4.55272	48.6707	3.8862e-07	3.82026e-06	21.8109	24.1997	25.6225	28.4822	26.1298	25.9594	18.7023	19.937	20.2488	20.2737	19.9042	20.8396
	ENSMUSG00000031513.9	Leprotl1	0.342112	5.92924	79.8547	5.55506e-09	1.11864e-07	70.7876	69.0344	68.9787	66.0693	64.2723	65.5369	51.0508	52.9943	56.3281	52.6975	51.8048	54.4703
	ENSMUSG00000014859.10	E2f4	0.341465	5.86596	62.3539	4.9644e-08	6.79546e-07	66.347	62.9331	67.4792	61.4779	67.3412	62.9126	49.2295	53.2142	53.3746	49.7477	51.5089	49.5111
	ENSMUSG00000046731.6	Kctd11	0.341202	5.32545	35.0884	4.66649e-06	3.10488e-05	43.5566	47.3712	47.0724	43.5015	42.5267	42.9111	36.6435	38.2126	35.2996	36.3334	32.1695	32.1131
	ENSMUSG00000030934.10	Oat	0.341011	7.98727	85.4948	2.97063e-09	6.65871e-08	278.057	285.392	287.65	277.118	293.829	277.468	237.938	236.459	216.735	221.418	205.471	223.681
	ENSMUSG00000078812.11	Eif5a	0.340953	8.0027	91.265	1.61857e-09	4.03232e-08	308.488	291.22	311.317	285.833	277.958	276.688	236.035	227.541	227.108	229.636	224.353	238.314
	ENSMUSG00000020027.19	Socs2	0.340759	6.75767	39.3582	2.01315e-06	1.50934e-05	116.238	124.426	126.939	124.123	125.388	124.123	91.6903	97.7304	96.3059	100.526	97.2348	101.759
	ENSMUSG00000025132.14	Arhgdia	0.340419	9.24236	73.0318	1.24295e-08	2.15679e-07	646.883	679.924	728.84	668.864	657.892	676.576	556.774	550.369	524.295	537.018	512.83	524.595
	ENSMUSG00000054766.14	Set	0.340316	6.75435	59.4315	7.47875e-08	9.59249e-07	128.711	129.774	124.266	118.676	112.674	109.37	94.6261	98.4145	99.9445	93.4555	93.3347	91.8137
	ENSMUSG00000024121.14	Atp6v0c	0.340313	7.82225	78.4199	6.55018e-09	1.28347e-07	260.295	264.826	271.612	254.705	247.97	251.225	196.157	205.845	203.693	202.175	203.991	213.03
	ENSMUSG00000026799.16	Med27	0.340107	3.66433	32.1502	8.64465e-06	5.2327e-05	13.5176	14.1908	14.3434	14.8636	15.6954	15.1785	11.1181	10.7259	11.5302	11.6117	12.8571	11.4361
	ENSMUSG00000029028.15	Lrrc47	0.340067	5.69767	54.975	1.43865e-07	1.6615e-06	59.2291	56.626	57.6996	59.9215	55.1532	56.8128	45.0976	43.4167	47.6568	48.6708	44.4886	43.5763
	ENSMUSG00000039483.11	Asb6	0.339025	5.0012	45.2519	6.91975e-07	6.11624e-06	32.3899	36.3339	37.0972	36.4198	33.4952	37.4497	30.6359	28.4884	27.6915	28.8654	27.1666	25.7176
	ENSMUSG00000045795.11	Whamm	0.338727	5.0954	34.9235	4.82662e-06	3.19679e-05	40.3568	44.9032	46.4204	37.7428	38.0548	39.081	34.4688	31.347	32.9841	32.1429	33.3799	30.8394
	ENSMUSG00000028849.18	Map7d1	0.338612	7.88825	46.8754	5.24248e-07	4.88897e-06	232.672	258.793	267.57	262.098	250.338	272.503	209.123	210.389	207.828	200.747	189.601	203.275
	ENSMUSG00000004040.17	Stat3	0.338286	8.02952	79.7098	5.6477e-09	1.13207e-07	321.874	319.807	312.947	291.981	316.627	271.226	241.553	238.975	256.312	231.04	238.313	244.845
	ENSMUSG00000020260.10	Pofut2	0.337575	6.37856	66.2727	2.92893e-08	4.41466e-07	89.1375	88.1611	97.8611	90.8161	90.6651	99.653	75.6248	72.5648	77.2385	73.1819	72.5966	69.0499
	ENSMUSG00000002608.9	Ccdc97	0.336871	5.98087	111.337	2.43429e-10	8.47335e-09	71.8977	68.8287	73.0209	67.8592	70.0594	68.374	53.5789	55.12	57.793	54.5001	55.4091	56.2047
	ENSMUSG00000049807.17	Arhgap23	0.336454	6.87415	43.5481	9.32841e-07	7.85884e-06	118.523	116.885	130.46	130.427	130.561	145.117	102.509	99.5384	109.821	109.164	92.7698	97.4504
	ENSMUSG00000024896.10	Minpp1	0.335647	5.0065	68.7312	2.12862e-08	3.40873e-07	34.349	36.9509	36.6409	35.486	35.2489	35.9602	26.6127	29.5146	29.7235	27.6949	28.5384	27.994
	ENSMUSG00000024168.9	Tmem204	0.335549	7.84242	40.1779	1.7248e-06	1.31693e-05	225.031	239.255	275.002	274.861	260.421	290.306	212.576	206.358	196.676	212.054	196.003	216.391
	ENSMUSG00000016319.4	Slc25a5	0.335462	7.68682	85.3243	3.02589e-09	6.75525e-08	238.81	222.254	234.906	221.165	232.713	220.939	180.499	186.054	181.341	185.085	172.709	180.701
	ENSMUSG00000030814.18	Bcl7c	0.335252	4.34959	33.772	6.12598e-06	3.9124e-05	21.4191	20.8406	23.9274	24.2021	20.8688	26.8105	18.2402	18.1534	19.8708	18.6817	17.9676	16.5308
	ENSMUSG00000029599.14	Ddx54	0.335068	5.99308	82.4857	4.13096e-09	8.78232e-08	67.3919	71.5024	74.5205	68.5596	70.4102	73.4808	56.9224	59.3468	56.6589	57.3562	53.4186	53.9012
	ENSMUSG00000027287.15	Snap23	0.334813	5.92563	42.0376	1.22372e-06	9.92035e-06	69.3509	68.4174	69.1743	68.4039	66.9028	64.2602	50.3168	54.729	59.4233	54.1958	50.5675	53.0611
	ENSMUSG00000028191.12	Bcl10	0.334557	5.30149	57.1547	1.03987e-07	1.26196e-06	45.5156	43.8749	48.8979	41.0112	48.4015	41.9181	37.5949	38.4081	33.1258	35.7716	33.9179	34.9857
	ENSMUSG00000039201.11	Tbc1d25	0.334383	4.13409	29.8151	1.44654e-05	8.12962e-05	18.5458	21.5261	20.2763	20.0776	18.589	19.4341	16.0927	16.5897	13.704	15.9895	15.1702	16.4495
	ENSMUSG00000120732.1	ENSMUSG00000120732.1	0.334173	5.69824	43.4401	9.50906e-07	7.99174e-06	54.8538	56.4204	57.5692	57.7426	56.5561	61.3522	46.8101	47.5947	45.0105	43.1459	42.5251	48.1832
	ENSMUSG00000001910.6	Nacc1	0.334077	6.81909	74.6005	1.02769e-08	1.84571e-07	123.944	118.394	125.896	122.411	123.634	125.116	98.8395	96.6554	100.677	94.4622	97.988	97.9382
	ENSMUSG00000015247.11	Nipsnap3b	0.334022	4.19376	51.644	2.40633e-07	2.5619e-06	21.8762	21.7318	21.0587	20.3111	22.0087	19.3632	16.2286	18.3245	17.0827	17.3942	15.6275	15.5281
	ENSMUSG00000030654.10	Arl6ip1	0.333854	7.56252	54.9597	1.44199e-07	1.66425e-06	201.718	213.616	232.819	201.321	208.337	205.477	152.391	176.721	169.528	179.443	159.153	165.091
	ENSMUSG00000020873.16	Slc35b1	0.333792	5.48771	65.9138	3.07091e-08	4.57332e-07	48.7154	49.9762	54.7657	50.8944	54.0133	48.6562	42.2977	39.532	41.0883	39.0256	41.772	39.8365
	ENSMUSG00000053286.12	Trmt1l	0.333751	5.16204	52.1726	2.21428e-07	2.39013e-06	39.2466	40.7214	43.0302	40.7778	38.4932	39.5775	30.3369	33.3505	34.1182	33.2198	29.7487	31.1375
	ENSMUSG00000002017.11	Fam98a	0.333734	5.1676	58.3418	8.74646e-08	1.09106e-06	40.8139	40.0358	39.6399	38.7544	40.1592	36.8822	27.3195	31.7135	33.6456	31.0894	32.035	31.6524
	ENSMUSG00000039275.10	Foxk2	0.333695	5.8449	88.5861	2.13724e-09	5.11265e-08	59.3597	62.3846	66.11	59.9993	66.289	66.8845	50.2896	50.4778	53.8708	48.6708	50.3523	48.6168
	ENSMUSG00000109336.2	Samd4b	0.333633	6.65346	69.8649	1.84267e-08	3.02868e-07	102.067	113.938	116.442	110.193	117.496	113.413	82.8828	85.2454	93.0925	92.0977	89.2193	91.8408
	ENSMUSG00000034300.18	Fam53c	0.333558	5.64596	55.1264	1.40616e-07	1.62949e-06	54.0049	56.1462	57.0476	58.6764	56.7315	56.6	41.4822	44.394	48.8381	46.6341	41.6375	46.0965
	ENSMUSG00000019132.12	BC005537	0.333305	7.98306	32.1377	8.66797e-06	5.24136e-05	293.729	301.434	298.669	285.756	292.163	262.857	210.863	230.644	260.257	242.02	219.619	213.329
	ENSMUSG00000038406.18	Scaf1	0.333243	7.03343	66.0967	2.99764e-08	4.49879e-07	137.461	141.291	153.279	140.854	144.941	146.11	114.09	118.596	121.776	113.753	107.725	109.781
	ENSMUSG00000019923.15	Zwint	0.332843	5.76047	50.4075	2.93005e-07	2.99708e-06	65.9552	63.2758	61.6114	59.0655	59.4497	58.586	45.5325	44.5651	52.2169	52.4166	50.5944	46.8824
	ENSMUSG00000020149.18	Rab1a	0.331849	7.64526	44.8311	7.44413e-07	6.51044e-06	228.754	238.981	233.406	230.192	217.719	219.166	177.944	174.424	186.705	181.222	179.972	186.879
	ENSMUSG00000039244.11	Ints15	0.33166	4.64147	40.5328	1.61416e-06	1.25037e-05	25.8597	28.1074	28.4912	24.3577	30.514	27.307	21.5294	23.4064	21.6665	23.3405	19.447	21.3274
	ENSMUSG00000024583.4	Txnl1	0.331436	5.64871	60.7458	6.20884e-08	8.19651e-07	56.6823	59.0254	57.7648	56.5753	55.767	57.5221	44.4452	44.0031	49.4997	44.4803	46.1563	44.3079
	ENSMUSG00000013858.15	Tmem259	0.331107	7.02377	61.4726	5.60882e-08	7.50093e-07	134.457	156.921	149.562	141.788	139.242	151.359	116.645	117.057	116.98	118.435	108.935	116.23
	ENSMUSG00000038383.17	Pigu	0.3308	5.06732	72.2087	1.37511e-08	2.34186e-07	37.6141	36.8138	36.9016	40.8556	37.6164	36.5985	28.7059	29.9299	29.3218	31.7449	29.8294	30.4058
	ENSMUSG00000030678.8	Maz	0.33051	7.04542	46.2972	5.78288e-07	5.31057e-06	127.013	141.154	155.104	138.209	138.19	145.33	112.377	119.06	113.365	116.983	102.614	107.586
	ENSMUSG00000025762.17	Larp1b	0.33045	4.13749	41.7581	1.28767e-06	1.03483e-05	22.5946	19.0582	21.4499	19.7663	20.255	18.4411	16.0655	17.0295	16.303	16.3173	15.5737	15.4197
	ENSMUSG00000062070.13	Pgk1	0.330396	6.40023	40.7853	1.54014e-06	1.20065e-05	109.838	92.6172	90.9502	91.5165	94.1725	89.5103	74.9452	77.0849	74.096	75.8507	75.5554	74.768
	ENSMUSG00000002981.11	Clptm1	0.329863	7.15953	102.437	5.42919e-10	1.6296e-08	152.677	163.365	164.623	157.508	160.198	163.771	131.161	125.584	129.148	128.22	122.438	128.94
	ENSMUSG00000024697.5	Gna14	0.329658	4.53256	30.2258	1.31905e-05	7.49039e-05	25.925	27.2847	26.5353	25.8363	25.7791	28.3	20.6867	21.916	20.8159	21.8188	20.1463	21.6797
	ENSMUSG00000029447.14	Cct6a	0.329614	6.46377	70.2998	1.74428e-08	2.8947e-07	100.761	99.6097	98.7086	97.5087	104.519	89.9359	80.1372	76.5962	83.736	78.7302	79.7245	71.2992
	ENSMUSG00000006699.18	Cdc42	0.329487	8.58097	71.4469	1.51114e-08	2.54124e-07	432.17	431.208	437.604	432.447	431.142	420.528	338.517	343.278	347.207	347.953	336.059	344.247
	ENSMUSG00000009291.14	Pttg1ip	0.329437	8.05618	114.142	1.91143e-10	6.97352e-09	285.436	287.106	319.988	296.261	306.718	296.122	238.319	233.722	246.152	241.294	227.204	239.127
	ENSMUSG00000043067.16	Dpy19l1	0.329333	4.83283	45.1607	7.02992e-07	6.20105e-06	34.0877	30.3697	34.033	33.3848	31.9169	29.5058	26.8302	24.5303	28.2585	25.0729	24.6113	24.5523
	ENSMUSG00000044715.8	Gskip	0.32895	4.43667	44.0271	8.5703e-07	7.33354e-06	24.2271	24.9538	24.123	23.1904	26.3052	24.8955	18.3217	19.6927	20.2016	19.267	20.0656	19.9725
	ENSMUSG00000078923.11	Ube2v1	0.328849	6.97066	65.8434	3.09964e-08	4.6004e-07	144.775	143.416	146.694	129.104	137.05	142.209	109.088	115.615	111.286	115.906	110.307	109.266
	ENSMUSG00000020737.13	Jpt1	0.327787	5.8901	37.1419	3.09069e-06	2.17509e-05	68.6326	65.9494	66.3056	63.6569	64.8861	63.1254	54.2585	51.8704	49.2871	49.1859	51.9124	56.3673
	ENSMUSG00000025651.15	Uqcrc1	0.327642	6.79688	38.0271	2.59933e-06	1.87623e-05	142.359	121.753	119.05	128.014	122.407	123.272	97.7794	97.3395	100.819	95.2113	108.209	103.819
	ENSMUSG00000001082.13	Mfsd10	0.327636	5.01976	46.5318	5.55667e-07	5.13528e-06	35.9815	36.5396	40.0963	35.5638	37.6164	32.3429	29.7932	26.998	30.4795	28.9122	28.1618	29.4844
	ENSMUSG00000046841.6	Ckap4	0.327604	6.00637	60.296	6.61489e-08	8.64746e-07	69.3509	70.5426	77.1935	70.7385	74.1806	73.6935	55.6176	59.3224	56.9896	58.199	54.4407	62.6002
	ENSMUSG00000025544.14	Tm9sf2	0.327563	7.39039	37.037	3.15533e-06	2.21343e-05	188.593	194.078	196.179	185.134	181.33	181.078	140.648	146.767	165.653	154.37	142.45	147.747
	ENSMUSG00000008090.15	Fgfrl1	0.327492	4.84721	30.4235	1.26211e-05	7.20223e-05	33.1735	32.7691	31.6207	29.4938	28.848	35.0381	25.4167	24.6036	26.0376	26.0327	26.0638	24.1458
	ENSMUSG00000030298.11	Sec13	0.327383	6.26863	65.2343	3.36064e-08	4.92904e-07	85.0888	86.2416	88.2119	86.2247	85.5795	85.6093	68.3939	68.68	69.5122	68.2422	67.8357	69.348
	ENSMUSG00000031813.9	Mvb12a	0.327241	4.9516	50.6894	2.80059e-07	2.89399e-06	33.8265	39.3503	38.7272	35.0969	35.8627	35.7474	28.7602	28.3907	28.8492	28.1397	28.2963	31.8692
	ENSMUSG00000027184.15	Caprin1	0.326585	7.50894	34.8252	4.92493e-06	3.25202e-05	209.228	202.442	196.439	204.511	195.623	203.703	146.384	167.119	186.256	160.036	151.272	155.335
	ENSMUSG00000015932.9	Dstn	0.326475	8.56715	54.1391	1.63339e-07	1.85206e-06	408.269	420.239	420.327	445.987	446.311	417.053	339.904	346.87	342.316	350.271	317.876	342.729
	ENSMUSG00000030036.9	Mogs	0.326025	5.52045	37.1959	3.05799e-06	2.15294e-05	51.2622	49.0165	50.7235	49.338	47.7	48.5853	37.1872	40.0695	43.3329	36.8953	37.7642	41.4354
	ENSMUSG00000015290.16	Ubl4a	0.325717	5.62129	66.7949	2.73492e-08	4.18739e-07	50.7398	53.8153	54.8961	54.6297	56.2931	58.2314	44.119	45.7867	44.9396	40.641	44.5693	42.0587
	ENSMUSG00000003348.11	Mob3a	0.324218	5.7144	31.0887	1.08927e-05	6.34462e-05	61.7759	55.4606	56.6564	61.2445	64.0092	52.9118	51.2683	49.5249	44.6797	48.2026	42.7941	44.5518
	ENSMUSG00000024601.10	Isoc1	0.324095	6.44096	66.6682	2.78067e-08	4.23142e-07	109.642	97.5531	101.512	95.4853	95.0493	95.3973	76.2772	78.0622	85.2009	76.8339	78.9714	79.7814
	ENSMUSG00000022564.8	Grina	0.32394	7.24809	29.1198	1.69394e-05	9.30997e-05	196.298	183.726	184.117	170.971	163.969	167.956	140.322	132.474	144.79	133.16	152.375	149.563
	ENSMUSG00000024817.14	Uhrf2	0.323407	5.34846	61.8685	5.30874e-08	7.16557e-07	45.4503	42.778	45.8989	42.8011	45.5079	42.4855	34.3057	33.0329	38.9382	35.1161	34.94	35.3651
	ENSMUSG00000026273.14	Mterf4	0.323183	5.7092	40.4266	1.64644e-06	1.27102e-05	55.5069	57.86	59.0035	54.7854	52.8734	57.9477	43.5481	41.4621	42.4114	46.5873	45.4031	50.8932
	ENSMUSG00000062300.15	Nectin2	0.323024	6.27542	31.2456	1.05236e-05	6.16672e-05	86.1336	83.8422	94.6664	83.2676	86.8947	85.1128	75.4617	76.6695	64.5032	70.7003	56.216	72.1122
	ENSMUSG00000017721.16	Pigt	0.322469	6.35689	42.9072	1.04588e-06	8.66877e-06	79.081	92.6172	92.7105	90.5827	91.4543	100.788	73.4773	75.1791	70.7409	71.0983	74.7215	72.3561
	ENSMUSG00000043998.11	Mgat2	0.322182	5.7256	72.5925	1.31169e-08	2.25944e-07	57.5312	56.2147	65.5232	58.3651	61.291	56.8838	48.8489	47.6191	49.9486	46.6809	46.1832	45.2835
	ENSMUSG00000004655.6	Aqp1	0.321949	10.0762	50.033	3.11221e-07	3.15362e-06	1125.55	1204.98	1134.95	1107.93	1114.29	1186.83	979.235	896.677	928.846	939.916	831.512	923.394
	ENSMUSG00000030224.11	Strap	0.321457	5.99401	77.5803	7.22111e-09	1.38536e-07	65.8899	75.4785	70.1522	72.9175	71.9885	75.183	58.3632	57.099	58.3128	56.7944	56.996	57.7765
	ENSMUSG00000030824.18	Nucb1	0.321379	8.09272	68.7511	2.1232e-08	3.4063e-07	287.852	283.816	318.815	297.195	297.161	311.158	245.142	248.455	231.148	235.676	235.811	241.133
	ENSMUSG00000058835.15	Abi1	0.321369	6.73881	33.3758	6.65739e-06	4.19734e-05	117.87	126.346	125.7	114.318	119.864	117.456	86.77	97.7548	107.718	97.7631	92.9312	94.5236
	ENSMUSG00000048970.10	C1galt1c1	0.321035	4.89737	58.919	8.0481e-08	1.01736e-06	34.349	34.7571	34.8153	31.6728	32.8815	32.0592	24.3021	25.9719	28.9201	27.5076	26.3059	27.5604
	ENSMUSG00000029394.12	Cdk2ap1	0.320739	5.8166	43.2336	9.86545e-07	8.23964e-06	55.2457	57.6544	61.0898	64.2794	65.1491	66.5299	51.078	48.8896	53.7527	48.9986	45.0804	48.1832
	ENSMUSG00000028779.17	Pef1	0.320705	6.15607	77.5479	7.24847e-09	1.38908e-07	75.4893	82.334	83.6481	81.7112	76.8111	81.3537	63.2834	63.5981	63.6054	65.0115	63.559	66.3942
	ENSMUSG00000017715.12	Pgs1	0.320294	6.49861	45.6831	6.42373e-07	5.74774e-06	100.957	101.186	110.575	100.699	99.1705	97.9507	85.2206	83.0709	84.8229	79.3155	73.4842	83.1418
	ENSMUSG00000026426.11	Arl8a	0.31994	6.32425	63.4859	4.25199e-08	5.97443e-07	91.9455	92.9599	97.6003	88.9484	89.7883	87.0988	74.2384	74.0308	74.0015	75.1952	71.1442	70.7301
	ENSMUSG00000035007.6	Rundc1	0.31986	5.20534	58.8866	8.08564e-08	1.02104e-06	42.6423	39.8987	41.4003	40.9334	44.4557	36.8822	33.0824	32.0556	34.3781	31.3703	33.1916	33.0887
	ENSMUSG00000039105.7	Atp6v1g1	0.319826	6.6069	56.5321	1.13984e-07	1.36827e-06	110.295	117.571	118.333	103.501	101.275	107.881	89.2709	88.2261	84.374	88.0945	85.2923	92.8163
	ENSMUSG00000025871.19	4833439L19Rik	0.319376	7.18639	93.7413	1.25909e-09	3.32686e-08	156.203	152.534	167.296	164.278	154.061	168.382	126.621	129.444	131.227	127.565	123.057	133.683
	ENSMUSG00000109511.2	Nup62	0.31919	5.29003	47.0715	5.07192e-07	4.77833e-06	41.6628	44.9718	47.268	41.0112	41.3868	41.5634	32.9737	35.2318	36.6463	33.6412	34.0793	34.1998
	ENSMUSG00000028757.5	Ddost	0.319112	7.15422	78.0431	6.84253e-09	1.33326e-07	156.856	160.486	169.904	158.675	163.092	154.834	127.763	130.763	131.629	124.475	123.783	134.17
	ENSMUSG00000031701.7	Dnaja2	0.319003	6.76134	65.8919	3.07981e-08	4.57485e-07	118.523	134.23	126.287	120.077	122.056	120.435	94.5174	97.4617	109.774	98.1611	96.6431	97.9382
	ENSMUSG00000032966.15	Fkbp1a	0.318604	8.31085	54.4443	1.55915e-07	1.77945e-06	352.175	340.785	359.954	337.973	336.005	350.452	299.618	269.956	274.505	280.671	252.945	288.097
	ENSMUSG00000022556.12	Hsf1	0.318597	5.90529	45.0528	7.16262e-07	6.30217e-06	61.5147	66.5664	71.391	63.7347	67.2535	63.1963	51.4042	52.1636	55.2412	52.955	52.262	51.5978
	ENSMUSG00000027782.11	Kpna4	0.318417	6.31972	32.5923	7.86188e-06	4.82249e-05	92.1414	88.9838	84.952	86.9251	90.4021	87.4535	66.4639	71.5631	82.72	67.891	70.2296	66.7736
	ENSMUSG00000059920.10	4930453N24Rik	0.318115	5.04369	44.4665	7.93358e-07	6.897e-06	39.8343	38.1849	39.3791	34.7078	37.0903	34.0451	28.1894	28.9282	28.6602	31.581	31.2281	30.5684
	ENSMUSG00000030890.17	Ilk	0.318092	7.59713	47.3913	4.80653e-07	4.54808e-06	205.833	207.652	228.973	225.99	240.955	210.371	192.704	174.156	166.834	181.035	161.655	182.083
	ENSMUSG00000073838.11	Tufm	0.317862	5.1847	36.5677	3.46294e-06	2.40791e-05	41.8587	36.0597	38.7272	36.6533	40.9484	42.1309	31.9407	32.4709	30.4087	30.9724	32.9765	30.8665
	ENSMUSG00000002733.9	Plekha3	0.31773	5.44185	50.3234	2.96996e-07	3.02884e-06	47.8665	51.8272	48.3764	46.3808	50.9443	47.3086	36.1542	38.8723	41.6317	40.2196	38.5443	39.3487
	ENSMUSG00000047824.14	Pygo2	0.317557	6.19797	101.97	5.67161e-10	1.69362e-08	78.232	80.8258	78.8235	80.3882	81.4583	81.4956	65.3765	66.9698	65.1411	63.9112	61.7569	62.9254
	ENSMUSG00000026563.14	Tada1	0.317452	4.20953	41.1194	1.44784e-06	1.14352e-05	18.807	20.772	20.3415	18.9881	22.7101	21.0654	16.0927	16.0767	17.0591	17.4644	16.0848	15.5552
	ENSMUSG00000040842.18	Szrd1	0.317339	7.04496	94.1841	1.20448e-09	3.19224e-08	140.661	150.683	144.868	145.679	145.818	155.615	116.319	118.303	121.398	115.321	118.753	118.805
	ENSMUSG00000025646.10	Atrip	0.316979	4.25567	33.1786	6.94031e-06	4.34118e-05	20.5702	23.7199	22.4931	19.0659	22.5348	22.7677	18.2946	17.5182	18.4531	15.8959	17.9407	17.2083
	ENSMUSG00000030718.10	Ppme1	0.316814	5.40589	30.6172	1.20889e-05	6.94166e-05	44.5361	49.4964	53.0054	45.0579	46.4725	45.89	39.2803	37.2842	38.2294	36.0993	38.3829	39.2132
	ENSMUSG00000022752.10	Tomm70a	0.316526	5.7653	45.1394	7.05587e-07	6.2208e-06	65.2369	58.8883	60.6986	62.4896	60.9403	62.6998	45.75	50.2823	54.3906	51.2226	48.9805	47.2076
	ENSMUSG00000052310.10	Slc39a1	0.316463	6.93204	66.5746	2.815e-08	4.27993e-07	136.677	135.532	147.802	136.963	136.085	141.075	112.214	111.437	107.222	108.345	110.979	119.726
	ENSMUSG00000010205.12	Raver1	0.31599	6.45683	97.9717	8.2988e-10	2.34179e-08	93.4474	101.941	99.5562	96.3414	95.7508	98.0926	82.5566	79.5526	78.4198	75.1015	78.7831	75.6623
	ENSMUSG00000032312.8	Csk	0.315878	6.60833	51.2397	2.56542e-07	2.7065e-06	101.806	107.973	105.489	108.559	109.254	113.413	93.5931	86.467	84.7756	91.3251	81.3383	81.7868
	ENSMUSG00000079562.8	Maea	0.315862	6.58397	64.9813	3.47599e-08	5.06837e-07	98.9981	104.546	112.791	109.104	104.519	104.689	90.6029	86.3937	85.6026	84.3722	82.3604	80.5131
	ENSMUSG00000068749.10	Psma5	0.315823	5.46175	30.8045	1.15975e-05	6.69475e-05	49.8909	51.4159	55.4829	48.7154	54.0133	48.5853	41.5093	43.8077	39.2926	40.2664	41.3954	41.2457
	ENSMUSG00000030105.9	Arl8b	0.315568	6.45624	36.2213	3.7109e-06	2.55088e-05	101.153	102.009	101.056	98.4425	88.5607	95.681	72.6074	76.5718	85.6971	81.5161	79.2941	76.0417
	ENSMUSG00000038235.5	F11r	0.315319	7.92302	48.2317	4.17838e-07	4.04815e-06	274.204	277.234	299.712	268.246	268.839	261.58	217.985	224.731	223.517	216.338	202.754	240.672
	ENSMUSG00000059005.14	Hnrnpa3	0.314823	8.78237	41.8038	1.27697e-06	1.02764e-05	513.798	513.199	498.498	485.053	485.067	437.835	374.862	412.178	409.891	415.61	375.544	370.263
	ENSMUSG00000034484.9	Snx2	0.314155	6.45767	50.1691	3.04466e-07	3.09416e-06	110.753	105.163	112.074	98.4425	96.1892	92.0637	84.4051	85.7584	80.1683	83.3187	81.1501	79.8085
	ENSMUSG00000039656.18	Rxrb	0.313473	5.96858	54.3419	1.58365e-07	1.80035e-06	60.2086	68.6916	72.4341	69.4156	69.9717	74.7575	56.1613	55.0711	56.3281	55.7877	54.0642	56.8551
	ENSMUSG00000027540.14	Ptpn1	0.313397	6.91103	97.4091	8.76443e-10	2.42608e-08	139.42	143.005	134.893	137.508	133.63	132.847	111.317	109.434	115.302	105.84	106.568	112.518
	ENSMUSG00000059995.13	Atxn7l3	0.313371	6.35466	77.0767	7.6591e-09	1.4561e-07	83.5868	91.7259	94.4056	88.0924	96.1015	88.1627	74.0753	73.6643	75.7263	70.2789	67.244	75.1474
	ENSMUSG00000052423.16	B4galt3	0.313136	5.66623	43.1325	1.00452e-06	8.36575e-06	55.8334	58.1342	59.5251	57.8204	60.5019	48.1597	48.7674	47.1305	43.9945	47.7812	42.0947	43.766
	ENSMUSG00000025648.19	Pfkfb4	0.313052	5.95047	60.9092	6.06814e-08	8.05345e-07	64.7798	71.9822	68.2615	71.2833	69.4456	71.2111	57.1399	58.3939	53.9417	56.7241	51.3475	58.0204
	ENSMUSG00000044496.7	2510039O18Rik	0.312711	6.16901	38.8489	2.21846e-06	1.63931e-05	75.1628	76.4383	88.3423	77.6645	76.1973	85.1838	62.2232	66.9698	65.8736	63.4664	62.8328	64.3617
	ENSMUSG00000031823.15	Zdhhc7	0.312516	5.61815	30.2602	1.30895e-05	7.44269e-05	49.3032	48.0567	56.7216	54.3963	57.3453	59.4371	42.7054	43.3923	47.0897	43.2162	42.4175	42.9259
	ENSMUSG00000024231.16	Cul2	0.31227	4.73396	33.7324	6.17689e-06	3.93709e-05	28.9289	28.0388	29.2736	29.9608	31.8293	30.8534	21.8556	24.2616	26.2738	24.3237	24.3692	22.845
	ENSMUSG00000005610.18	Eif4g2	0.312177	9.26075	42.8737	1.05219e-06	8.70863e-06	669.152	699.462	656.732	680.926	675.078	701.614	528.096	567.447	584.924	553.148	533.352	521.506
	ENSMUSG00000010080.16	Epn3	0.310509	6.30447	31.2731	1.04604e-05	6.13794e-05	85.5459	92.4115	83.1917	82.4894	86.8071	93.2695	74.1297	68.0937	65.0939	74.1183	63.3976	77.505
	ENSMUSG00000038503.16	Mesd	0.310488	6.16519	91.0266	1.65866e-09	4.11117e-08	81.04	80.2088	82.0833	80.0769	76.285	76.8853	64.7785	64.8441	64.3142	63.4664	63.1018	63.8739
	ENSMUSG00000018040.10	Rrp7a	0.310119	5.74252	63.5333	4.22466e-08	5.94623e-07	59.8168	59.7795	63.9585	60.5441	57.1699	54.2594	48.8489	47.5458	49.4761	48.8113	46.9094	45.2293
	ENSMUSG00000011752.8	Pgam1	0.309915	6.74477	44.9124	7.33955e-07	6.44099e-06	133.674	109.687	114.486	116.652	115.041	121.002	96.4474	98.3168	91.0606	93.9237	95.1906	98.3447
	ENSMUSG00000044709.7	Gemin7	0.309763	4.91183	42.7825	1.06956e-06	8.82725e-06	30.5614	32.015	37.9448	34.163	32.7938	33.9742	26.9118	27.2912	27.2189	26.5946	27.6238	26.91
	ENSMUSG00000047832.10	Cdca4	0.309285	4.46603	31.1666	1.07077e-05	6.25775e-05	23.9006	25.7079	24.3186	22.8013	24.0254	24.1153	20.8226	19.0819	18.2641	19.0095	19.8773	19.9183
	ENSMUSG00000011096.18	Akt1s1	0.308844	5.28297	37.7006	2.76991e-06	1.98131e-05	42.3158	42.0239	43.8126	42.412	40.773	48.3015	33.4086	34.5233	38.064	34.6478	35.0207	33.983
	ENSMUSG00000000378.16	Ccm2	0.308327	5.22718	46.7094	5.39177e-07	5.00944e-06	41.1404	40.2415	43.0954	41.089	46.4725	41.7762	37.8396	34.1079	32.606	33.8987	33.4068	33.0074
	ENSMUSG00000027429.17	Sec23b	0.308001	5.93499	48.2782	4.14633e-07	4.02605e-06	72.8772	69.8571	72.043	70.7385	65.8506	61.2813	54.0682	56.5615	61.0536	54.0319	53.4186	54.2535
	ENSMUSG00000024283.16	Wac	0.307991	6.63809	47.8867	4.42471e-07	4.24903e-06	109.446	112.498	111.618	105.835	113.2	115.753	82.0945	90.6205	98.1488	93.6194	83.9743	91.353
	ENSMUSG00000024212.10	Mllt1	0.307952	6.16612	70.0288	1.8049e-08	2.98347e-07	73.3997	76.1641	81.2358	76.6529	80.1431	78.8712	61.3806	62.1321	65.4719	63.443	61.3803	62.9254
	ENSMUSG00000029598.13	Plbd2	0.307707	6.52551	44.6436	7.69164e-07	6.70002e-06	100.369	105.231	114.421	99.6098	93.6464	102.703	80.4906	82.289	86.2878	81.914	83.3288	83.5483
	ENSMUSG00000047260.5	Emc6	0.307418	5.34308	40.5357	1.61329e-06	1.25037e-05	50.6745	44.4919	46.8116	43.1124	42.8774	45.9609	35.2571	36.6	37.6859	37.8785	36.3925	37.6956
	ENSMUSG00000016921.15	Srsf6	0.307303	7.7096	35.9702	3.90271e-06	2.66482e-05	238.81	244.465	229.234	232.449	231.047	210.087	182.049	191.6	203.315	187.965	181.344	173.871
	ENSMUSG00000030216.13	Wbp11	0.306985	6.17735	52.5914	2.07395e-07	2.26642e-06	78.2973	78.3578	83.9741	77.1198	80.5815	80.3607	64.3707	64.722	69.1342	61.3829	65.7915	61.5433
	ENSMUSG00000027569.16	Mrgbp	0.306089	4.74428	49.8213	3.22061e-07	3.24649e-06	31.0185	32.3577	31.9467	30.1164	30.777	28.5837	26.1778	24.457	26.2029	24.4408	24.154	24.0645
	ENSMUSG00000071379.3	Hpcal1	0.305929	6.56482	32.9217	7.32884e-06	4.53862e-05	90.3782	109.139	105.815	99.4542	115.83	112.704	86.7972	85.3919	80.0501	87.7199	77.1961	94.9843
	ENSMUSG00000053317.12	Sec61b	0.30589	5.09234	49.1944	3.56635e-07	3.53372e-06	40.7486	38.322	41.2047	35.3304	37.0903	38.5136	32.9465	30.9072	29.7235	30.9489	30.5288	32.1402
	ENSMUSG00000061479.16	Snrpa	0.305651	5.39484	33.9628	5.8867e-06	3.78812e-05	46.4299	46.3429	48.246	44.8244	42.9651	46.8121	36.5347	38.7501	36.8826	36.8719	37.3339	36.7471
	ENSMUSG00000009281.7	Rarres2	0.305557	7.0829	32.1472	8.65007e-06	5.23417e-05	156.072	151.848	171.73	144.901	161.251	140.933	132.602	128.002	117.453	118.552	118.269	135.038
	ENSMUSG00000032042.12	Srpr	0.305545	7.45238	95.5975	1.0467e-09	2.82998e-08	191.14	189.553	198.917	196.807	205.969	184.269	161.226	158.592	151.571	157.179	155.63	159.698
	ENSMUSG00000032714.7	Syde1	0.305311	6.77989	44.704	7.61091e-07	6.63803e-06	112.45	122.781	125.244	122.645	134.946	118.732	100.634	102.886	99.2121	100.877	94.3568	98.1008
	ENSMUSG00000003308.16	Keap1	0.305066	6.27827	50.4233	2.92263e-07	2.99282e-06	91.4884	94.6052	98.839	86.7695	86.9824	81.1409	69.6172	72.3449	77.6637	70.7705	74.8829	71.787
	ENSMUSG00000079614.5	Seh1l	0.304975	5.77093	34.2658	5.52725e-06	3.60201e-05	66.4123	64.3727	58.3515	60.3884	62.1679	56.3163	47.8703	49.9891	54.5796	49.1391	51.1592	45.1209
	ENSMUSG00000001870.17	Ltbp1	0.304686	6.77811	33.5461	6.42309e-06	4.07317e-05	125.054	121.616	129.417	133.617	121.705	118.236	99.5191	101.884	95.7388	108.579	96.0782	105.12
	ENSMUSG00000030805.15	Stx4a	0.30467	6.00119	57.0102	1.06219e-07	1.28547e-06	72.7466	67.5262	74.4553	71.6724	69.7087	68.0194	61.3806	59.078	54.9577	57.8244	53.6338	56.557
	ENSMUSG00000029580.15	Actb	0.30452	11.146	45.537	6.58731e-07	5.87903e-06	2685.81	2544.54	2709.92	2605.89	2576.07	2277.12	2095.86	2071.76	1942.63	2060.91	2072.3	2225.61
	ENSMUSG00000026889.13	Rbm18	0.303651	5.36784	59.9497	6.9472e-08	9.02102e-07	45.8421	47.5083	46.0945	43.4236	44.8065	48.5853	36.0454	35.6716	36.5754	38.3467	39.3781	37.8853
	ENSMUSG00000089847.9	Timm10b	0.303522	4.84944	39.0068	2.15247e-06	1.60004e-05	31.8022	33.8659	31.6207	31.9841	34.5475	28.5837	27.1292	27.4622	26.77	24.6281	24.0196	25.7989
	ENSMUSG00000079111.4	Kdelr2	0.303237	6.27335	51.9022	2.31033e-07	2.47177e-06	85.0888	86.173	94.0144	86.536	82.3352	88.6592	70.5414	72.4915	70.6936	67.5867	69.6379	72.871
	ENSMUSG00000074922.2	Fam122a	0.302795	3.73519	29.679	1.49169e-05	8.34035e-05	16.3255	14.7392	16.6253	14.4745	15.0816	14.0436	12.6947	13.0714	12.1446	12.5715	12.1308	11.4361
	ENSMUSG00000012114.18	Med15	0.302778	6.35835	51.6044	2.42142e-07	2.57179e-06	95.5371	94.331	97.9915	93.1507	84.0889	86.6733	74.8636	75.57	76.3642	74.4226	75.0981	71.1637
	ENSMUSG00000020361.14	Hspa4	0.302569	7.19013	69.9468	1.82368e-08	3.01166e-07	156.725	155.002	157.191	163.189	160.988	154.48	115.884	129.42	135.929	128.103	124.052	134.821
	ENSMUSG00000003848.15	Nob1	0.302191	4.44492	45.3145	6.84527e-07	6.06578e-06	24.0312	24.0626	25.1009	23.8908	27.5327	23.6897	19.0557	20.0347	20.9104	19.5948	20.9801	19.5931
	ENSMUSG00000028955.4	Vamp3	0.302109	6.76595	38.2865	2.47195e-06	1.79618e-05	115.715	118.942	123.81	130.427	121.267	123.91	98.0784	99.8561	104.316	99.5189	96.3741	97.1523
	ENSMUSG00000049659.16	Aftph	0.301733	6.33596	64.3342	3.79104e-08	5.45928e-07	96.6472	100.912	98.2523	93.3842	92.5065	84.7582	75.0811	78.3309	80.0738	79.1048	73.0539	73.955
	ENSMUSG00000029776.12	Hibadh	0.301665	6.21006	35.0856	4.66917e-06	3.10548e-05	94.8188	74.176	80.1926	78.9875	83.6504	81.5665	61.7068	63.5981	71.9931	65.269	70.7138	67.0446
	ENSMUSG00000026245.17	Farsb	0.301596	4.88326	51.1321	2.60964e-07	2.73854e-06	33.7612	31.7407	31.5555	32.451	32.8815	32.9103	27.0477	26.9003	27.2189	25.6347	27.6238	24.0103
	ENSMUSG00000017221.15	Psmd3	0.30127	6.70546	68.7429	2.12545e-08	3.40678e-07	116.107	119.079	122.114	113.851	109.429	115.399	97.4804	90.0097	96.0224	91.3486	94.7064	95.3908
	ENSMUSG00000040354.15	Mars1	0.301266	5.32559	30.627	1.20626e-05	6.93114e-05	41.271	46.6171	46.8768	41.7894	48.9276	44.5424	37.6765	35.4517	38.9382	36.2866	36.4462	34.2269
	ENSMUSG00000034928.17	Rnf44	0.301262	7.45641	56.8048	1.09482e-07	1.32037e-06	187.221	198.808	199.634	181.944	194.22	191.717	160.818	159.838	163.857	155.424	149.551	146.663
	ENSMUSG00000030082.15	Sec61a1	0.301214	7.6142	70.2835	1.74788e-08	2.8947e-07	212.297	217.455	229.56	214.395	220.613	218.669	176.422	176.965	177.963	172.607	177.605	184.034
	ENSMUSG00000022184.9	Fbxo4	0.300862	4.10865	31.6448	9.64471e-06	5.7463e-05	19.1988	18.8525	21.9715	20.3889	19.4658	18.512	16.0655	15.0505	15.4997	17.16	16.1386	16.2056
	ENSMUSG00000027404.17	Snrpb	0.300576	7.02135	72.8976	1.26353e-08	2.18382e-07	137.331	139.988	150.41	141.555	148.887	148.522	122.87	118.254	115.35	121.689	111.544	113.927
	ENSMUSG00000017837.13	Nkiras2	0.30047	5.27785	48.3817	4.07596e-07	3.97099e-06	41.2057	43.7378	44.5297	41.4003	49.1907	45.3935	37.9755	35.6472	34.8506	34.6478	35.5855	36.72
	ENSMUSG00000057177.13	Gsk3a	0.300403	6.51475	78.4798	6.50491e-09	1.27603e-07	96.1248	107.836	103.924	95.5632	99.2582	104.192	81.9313	80.1389	85.8152	84.4658	80.2355	80.2692
	ENSMUSG00000028670.15	Lypla2	0.300281	6.02784	54.9114	1.45256e-07	1.67313e-06	70.7876	69.8571	78.2367	71.9836	71.4624	68.2321	58.6894	59.2002	59.9667	58.6672	57.0498	56.0963
	ENSMUSG00000023191.10	P3h3	0.299795	5.65773	30.7429	1.17567e-05	6.77993e-05	51.1316	49.5649	59.7207	53.3846	58.0467	60.7848	47.0548	44.5162	44.5143	46.7043	42.1754	45.1751
	ENSMUSG00000027193.13	Api5	0.299753	6.57401	31.619	9.69908e-06	5.7708e-05	109.316	109.687	104.511	106.691	105.308	101.71	80.4363	88.0307	94.4393	86.643	83.1943	84.9032
	ENSMUSG00000038412.9	Higd1a	0.299449	5.15163	29.2623	1.63972e-05	9.05479e-05	41.1404	37.4993	40.7483	35.9529	37.8794	40.8542	30.4456	30.0032	30.6686	31.2533	31.7392	36.2322
	ENSMUSG00000001630.14	Stk38l	0.299051	4.87411	32.5991	7.85036e-06	4.81712e-05	37.6794	36.7452	33.2506	32.6845	33.846	30.2151	26.2865	28.8793	27.2426	27.9992	28.8611	26.9371
	ENSMUSG00000038546.10	Ranbp9	0.298847	5.84527	42.5676	1.11174e-06	9.13647e-06	57.8577	71.1596	63.0457	61.5557	61.3787	65.1823	48.8761	48.8652	54.8632	51.5035	48.8191	56.1505
	ENSMUSG00000026879.15	Gsn	0.298246	12.0256	38.3476	2.44291e-06	1.78028e-05	4313.8	4393.04	4895.01	4814.03	4627.17	4645.6	4010.07	3759.25	3531.85	3983.33	3537.14	3695.85
	ENSMUSG00000025162.19	Csnk1d	0.29808	7.47042	111.181	2.46746e-10	8.53771e-09	186.764	196.203	197.482	190.348	205.531	193.49	161.851	161.573	162.794	154.089	153.693	157.368
	ENSMUSG00000020720.14	Psmd12	0.297917	5.59702	42.6288	1.09955e-06	9.0448e-06	57.3353	55.8034	51.1798	52.2951	53.5749	57.3802	44.8257	43.49	44.3489	43.0523	44.4079	46.3946
	ENSMUSG00000038650.16	Rnh1	0.297806	7.10307	54.8967	1.45578e-07	1.67573e-06	149.477	159.938	174.011	153.539	158.006	147.955	133.254	127.929	123.69	128.127	123.514	130.593
	ENSMUSG00000003200.11	Sh3gl1	0.297714	5.76725	59.3085	7.6113e-08	9.73833e-07	53.7437	59.1626	62.7849	59.8437	59.8881	62.6289	50.2081	46.3486	47.137	48.0856	47.6894	51.8146
	ENSMUSG00000020257.14	Wdr82	0.297679	6.34762	69.0392	2.04644e-08	3.31364e-07	86.3948	81.0314	90.233	91.5943	94.5232	92.4893	70.5142	74.0797	75.3482	71.6367	72.4352	72.1122
	ENSMUSG00000018293.5	Pfn1	0.297093	8.49006	43.9844	8.63505e-07	7.37109e-06	402.653	386.168	417.262	393.381	377.128	387.831	343.383	325.418	313.207	325.128	291.005	326.334
	ENSMUSG00000031862.12	Atp13a1	0.296908	6.07054	52.3286	2.16081e-07	2.34781e-06	74.1833	69.2401	76.1504	77.042	74.619	71.3529	64.0445	61.4969	61.219	58.9247	57.0498	57.4784
	ENSMUSG00000040731.14	Eif4h	0.296653	8.65321	80.3433	5.25473e-09	1.07178e-07	433.215	428.329	473.723	448.633	445.522	442.303	372.633	364.315	354.153	372.113	342.137	369.802
	ENSMUSG00000032803.16	Cdv3	0.29644	6.85723	49.2651	3.52541e-07	3.50112e-06	127.6	132.996	140.239	128.325	127.931	130.648	101.694	109.922	121.493	102.235	102.614	103.494
	ENSMUSG00000035227.8	Spcs2	0.296378	6.69582	82.604	4.07706e-09	8.71322e-08	112.124	111.607	116.703	118.209	113.2	115.612	89.5428	94.3587	92.7381	93.1044	96.3472	93.6835
	ENSMUSG00000035027.19	Map2k2	0.29614	6.19197	54.126	1.63667e-07	1.85457e-06	81.5624	83.3623	86.4515	78.3649	79.4416	79.5805	68.856	68.4602	67.6457	67.9847	59.5782	65.6083
	ENSMUSG00000020282.19	Rhbdf1	0.296036	6.30468	49.3319	3.48722e-07	3.47308e-06	80.6482	84.9391	86.9731	86.1469	87.5962	90.1487	70.1065	68.7533	73.8597	70.4896	67.0019	70.3507
	ENSMUSG00000010067.14	Rassf1	0.295894	5.94407	63.8118	4.06809e-08	5.78658e-07	66.8694	71.2967	76.1504	70.1938	69.7087	65.6078	60.6194	58.1496	58.4073	53.1423	54.5752	57.1261
	ENSMUSG00000025351.15	Cd63	0.295549	6.75399	32.7727	7.56492e-06	4.66494e-05	122.768	127.306	132.285	121.01	119.601	119.229	93.8106	98.0969	97.4636	100.455	100.947	114.062
	ENSMUSG00000032215.16	Rsl24d1	0.295176	4.84206	45.0758	7.13417e-07	6.28348e-06	30.8226	33.3175	33.1202	31.3615	32.0046	29.8604	27.1564	25.923	24.4309	24.1364	27.6507	25.9886
	ENSMUSG00000071652.9	Ints5	0.294596	4.81918	28.7572	1.84093e-05	9.98568e-05	31.2797	32.2892	36.9016	26.9258	30.8647	32.1301	26.205	24.457	26.6991	27.5076	24.3423	26.1512
	ENSMUSG00000025409.15	Mbd6	0.294591	6.95232	44.1857	8.33429e-07	7.17737e-06	124.597	145.473	145.846	139.454	127.58	132.847	114.524	114.222	111.546	113.612	103.502	107.775
	ENSMUSG00000037373.13	Ctbp1	0.294473	7.40562	54.3884	1.57246e-07	1.78996e-06	174.683	186.331	186.725	185.134	174.228	194.696	156.387	151.409	153.626	150.859	139.222	146.907
	ENSMUSG00000026797.17	Stxbp1	0.294085	6.13723	62.2473	5.03788e-08	6.86909e-07	75.6199	75.1358	75.6288	76.3416	79.0909	76.6725	61.4621	60.6417	64.1488	63.6303	62.9673	61.0013
	ENSMUSG00000036810.17	Cnep1r1	0.293996	5.01309	34.3977	5.37835e-06	3.51548e-05	37.9406	34.8943	36.7061	32.3732	36.3888	33.8324	27.7816	28.1708	30.5977	29.1931	29.7756	27.5333
	ENSMUSG00000004069.18	Dnaja3	0.293949	5.56567	58.5518	8.48505e-08	1.06454e-06	54.5926	48.1253	54.6353	51.6726	51.032	51.777	41.2647	41.511	43.9945	41.039	43.4665	43.1427
	ENSMUSG00000045576.17	St7l	0.293623	4.5283	31.4707	1.00179e-05	5.93014e-05	25.5985	25.7079	24.6446	23.0348	29.2864	27.5198	21.9372	21.6717	22.3044	20.976	20.2539	19.837
	ENSMUSG00000030870.13	Ubfd1	0.293492	5.47949	43.2638	9.81249e-07	8.20326e-06	49.9562	44.3548	48.4416	49.338	52.2596	49.5073	38.1114	42.7082	40.7575	39.4939	41.4492	37.0994
	ENSMUSG00000022895.17	Ets2	0.293275	7.94594	46.9685	5.16078e-07	4.82826e-06	254.744	284.227	272.329	299.296	284.973	284.844	235.437	222.605	235.189	228.348	211.738	237.854
	ENSMUSG00000024997.8	Prdx3	0.292965	5.57178	33.4873	6.50296e-06	4.11186e-05	61.3188	47.3026	51.7014	50.0384	53.5749	56.3873	43.1675	40.6803	43.073	42.5138	45.9142	46.2049
	ENSMUSG00000027593.16	Raly	0.292965	7.058	49.9043	3.17765e-07	3.21061e-06	134.653	140.125	155.495	142.567	148.361	143.912	118.901	115.2	121.682	115.696	114.664	119.943
	ENSMUSG00000031960.15	Aars	0.29266	6.59087	51.9229	2.30283e-07	2.46526e-06	115.977	117.571	107.249	106.769	104.958	97.8798	90.2767	90.6938	90.4699	82.1482	88.5469	88.9682
	ENSMUSG00000020857.12	Nme2	0.292511	6.42769	31.4238	1.0121e-05	5.97295e-05	97.6268	94.0568	101.056	91.5943	97.7675	102.561	88.7544	82.8021	77.8291	79.6432	75.0981	73.2775
	ENSMUSG00000008475.14	Arpc5	0.292401	7.31582	48.265	4.15541e-07	4.03262e-06	186.242	186.4	194.157	168.014	178.437	163.629	149.646	149.234	143.939	152.099	140.163	144.333
	ENSMUSG00000026914.16	Psmd14	0.292281	5.32326	46.5633	5.52699e-07	5.1187e-06	46.6911	47.7825	43.3562	43.1902	45.5079	43.0529	35.2843	36.4779	39.7179	36.8953	37.818	33.9288
	ENSMUSG00000020088.11	Sar1a	0.292253	7.50778	90.9231	1.67642e-09	4.14681e-08	200.674	197.368	208.827	195.562	210.441	198.668	163.863	167.754	167.614	161.487	161.601	167.015
	ENSMUSG00000018770.10	Atp5g3	0.292211	6.71543	38.5219	2.3622e-06	1.73159e-05	125.315	110.441	115.921	117.586	114.778	121.782	92.9951	90.254	97.629	92.3084	101.754	101.542
	ENSMUSG00000019461.13	Plscr3	0.291926	6.77188	29.7147	1.47968e-05	8.28609e-05	118.589	121.958	120.876	119.376	114.778	118.945	104.847	102.299	90.021	103.709	92.1781	90.6213
	ENSMUSG00000025510.15	Cd151	0.291204	7.83974	52.7454	2.02481e-07	2.218e-06	245.34	244.877	264.505	254.861	239.289	257.608	203.768	194.312	199.795	204.727	204.906	223.708
	ENSMUSG00000091896.9	Ube2d2a	0.291114	6.90747	53.3913	1.83203e-07	2.03625e-06	135.829	134.641	133.524	130.349	138.102	129.655	101.83	108.701	117.712	109.047	107.644	110.54
	ENSMUSG00000027509.12	Rae1	0.291066	4.87658	40.2072	1.71534e-06	1.31227e-05	33.0429	32.8376	30.7731	30.0386	34.5475	34.6835	27.4554	27.0469	27.9041	25.424	25.3913	26.8558
	ENSMUSG00000004056.16	Akt2	0.290465	7.29699	57.9811	9.21607e-08	1.13502e-06	181.018	163.365	171.143	167.702	166.862	180.723	140.322	143.664	135.173	139.317	137.447	146.989
	ENSMUSG00000028413.14	B4galt1	0.290365	7.39426	35.4582	4.32806e-06	2.91305e-05	195.645	206.075	203.024	193.227	191.151	162.211	148.422	154.414	157.903	150.063	157.27	173.438
	ENSMUSG00000026269.15	Rnpepl1	0.290191	7.25941	47.847	4.45406e-07	4.26314e-06	157.574	167.136	180.988	159.064	165.284	168.594	138.201	136.114	138.245	140.511	131.099	132.544
	ENSMUSG00000033379.14	Atp6v0b	0.2897	6.53317	45.444	6.69383e-07	5.9558e-06	98.0839	95.8392	114.617	97.8978	101.889	98.8728	82.3119	83.193	86.4059	83.2719	78.1375	83.4399
	ENSMUSG00000026201.13	Stk16	0.289637	5.67331	46.4828	5.60303e-07	5.16444e-06	51.4581	55.0493	54.1137	50.8166	60.1511	58.2314	47.0548	46.5197	44.5616	45.4168	42.9017	43.224
	ENSMUSG00000029500.17	Pgam5	0.289428	4.53918	51.7907	2.35125e-07	2.51246e-06	25.1413	25.1595	26.9265	24.5912	25.8667	26.1013	21.1488	21.3541	21.9264	21.1165	20.496	19.7828
	ENSMUSG00000024862.17	Klc2	0.288656	5.05044	40.0841	1.75538e-06	1.33736e-05	37.5488	32.015	36.3149	37.9762	34.2844	35.3218	29.9291	29.197	30.4559	28.5376	28.0811	28.563
	ENSMUSG00000074743.5	Thbd	0.288106	9.91428	29.2531	1.64317e-05	9.06525e-05	972.219	1095.3	1046.55	1028.86	963.558	1071.36	813.877	803.539	945.267	835.364	800.768	860.739
	ENSMUSG00000043284.13	Tmem11	0.288093	4.56073	39.0539	2.13318e-06	1.58773e-05	27.231	26.3935	25.1009	25.9141	25.516	28.3	20.1702	21.2075	22.4698	20.578	22.9168	22.4656
	ENSMUSG00000028277.14	Ube2j1	0.287975	5.89513	62.1567	5.10126e-08	6.93382e-07	66.5429	68.8287	67.8703	62.3339	63.4831	62.5579	51.8663	52.8966	55.5484	54.5001	51.7241	54.3077
	ENSMUSG00000034403.17	Pja1	0.287955	5.89637	56.0643	1.22182e-07	1.45244e-06	61.9718	64.4412	68.5875	67.3923	60.3265	62.7707	53.8779	51.675	52.7131	53.0252	49.8681	54.66
	ENSMUSG00000023010.16	Tmbim6	0.28792	9.85773	71.6274	1.47763e-08	2.49693e-07	998.862	1073.36	1121.72	1010.26	1019.24	1026.6	844.785	842.265	881.024	841.708	809.08	900.495
	ENSMUSG00000042492.13	Tbc1d10b	0.287489	5.86041	39.8007	1.85148e-06	1.40037e-05	59.425	65.401	70.9998	58.7542	64.7107	59.8627	48.713	55.2421	52.2405	49.9818	52.4772	52.0314
	ENSMUSG00000020993.10	Trappc6b	0.287363	5.60415	37.422	2.92509e-06	2.07192e-05	56.8129	54.7751	57.0476	52.0617	53.3995	51.2805	41.7812	43.5145	47.3969	47.594	42.7134	43.6576
	ENSMUSG00000020482.5	Ccdc117	0.287326	5.49943	36.5594	3.46868e-06	2.41027e-05	49.8256	50.5932	52.4838	50.1162	52.7857	47.2376	37.4046	42.6349	44.3962	41.7179	41.7182	40.3514
	ENSMUSG00000020325.11	Fstl3	0.287166	5.03903	31.3141	1.03669e-05	6.09126e-05	35.002	36.1282	40.0311	33.8518	37.3533	37.3078	29.9563	29.4902	28.0223	30.6446	27.3011	34.6605
	ENSMUSG00000029405.17	G3bp2	0.286172	6.77896	29.364	1.60217e-05	8.86712e-05	138.571	127.237	124.527	126.146	119.338	116.746	96.7736	103.57	110.104	104.271	103.636	98.8867
	ENSMUSG00000038502.18	Ptov1	0.286167	6.67044	33.4137	6.60442e-06	4.16695e-05	98.0839	106.054	118.789	112.139	115.129	118.307	95.6862	94.432	88.5324	91.6763	86.5565	91.2446
[truncated: 1,805 more rows]

## Sheet: d IPA Canonical 2dpi
	Ingenuity Canonical Pathways	-log(p-value)	Ratio	z-score	Molecules
[truncated: 307 more rows]

[truncated: 2 more sheets: e IPA D&F 2dpi, f IPA USRs 2dpi]
