# Supplementary material for: Microplastics dysregulate innate immunity in the SARS-CoV-2 infected lung
Source: Front Immunol. 2024 May 13;15:1382655. doi: 10.3389/fimmu.2024.1382655 (PMC11128561; doi:10.3389/fimmu.2024.1382655)
Supplement: Supplementary file 7 [file Table_6.xlsx]

## Sheet: a Alignment summary
Lungs harvested at 6 dpi	Sample name	Group	dpi	Total reads	Viral reads	Viral reads per million		Mean viral RPM
Paired end RNA-Seq reads were aligned to the mouse GRCm39 and the SARS-CoV-2 BA.5 reference genomes. Paired alignments were counted using Samtools	M1	BA.5+MP	6	32972960	4	0.121312
	M2	BA.5+MP	6	41375958	4	0.0966745
	M3	BA.5+MP	6	29702394	2	0.0673346
	M4	BA.5+MP	6	34339196	0	0
	M5	BA.5+MP	6	33419192	32	0.957534				Viral reads not significantly different
	M6	BA.5+MP	6	35582118	0	0		0.207142		Kolmogorov-Smirnov test
	M1	BA.5	6	33838834	0	0				p=0.44
	M2	BA.5	6	36465474	2	0.0548464
	M3	BA.5	6	32493092	0	0
	M4	BA.5	6	27067204	4	0.14778
	M5	BA.5	6	33818808	0	0
	M6	BA.5	6	38599478	0	0		0.0337711

## Sheet: b All genes BA5+MPvsBA5 6dpi
	Ensembl_ID	HUGO_ID	logFC	logCPM	F	PValue	FDR
All genes BA.5+MP vs. BA.5, 6 dpi	ENSMUSG00000032315.7	Cyp1a1	3.90973	5.47801	6.56567	0.017093	0.171763
	ENSMUSG00000097748.2	Gm26533	3.4582	-0.395762	8.33821	0.00809106	0.121219
	ENSMUSG00000063779.7	Chil4	3.00844	1.7554	9.35168	0.00540283	0.100176
	ENSMUSG00000085791.5	Rpl30-ps9	2.91693	0.96999	7.77853	0.0104283	0.136735
	ENSMUSG00000107877.3	ENSMUSG00000107877.3	2.8379	2.3403	11.5277	0.00238459	0.0637877
	ENSMUSG00000090877.4	Hspa1b	2.64113	7.98683	25.3938	3.76049e-05	0.00702793
	ENSMUSG00000091971.4	Hspa1a	2.46043	7.63966	19.5285	0.000181843	0.0173191
	ENSMUSG00000029371.8	Cxcl5	2.28324	1.21666	15.6759	0.000583712	0.031266
	ENSMUSG00000096833.3	Igkv4-55	2.21112	0.733929	6.66024	0.0163999	0.168233
	ENSMUSG00000103651.2	Gm37206	1.98479	-0.112348	5.80983	0.0239573	0.200374
	ENSMUSG00000072693.3	ENSMUSG00000072693.3	1.79289	0.742258	5.92043	0.0227846	0.195616
	ENSMUSG00000095351.3	Igkv3-2	1.78659	0.227977	8.32964	0.0081193	0.121328
	ENSMUSG00000023034.8	Nr4a1	1.76624	7.61326	49.6936	2.74007e-07	0.000296852
	ENSMUSG00000038540.15	Tmc3	1.73471	0.293303	5.05113	0.0340685	0.233806
	ENSMUSG00000078881.11	Gm14434	1.71258	0.523285	7.48261	0.0115267	0.142573
	ENSMUSG00000057074.7	Ces1g	1.48418	2.49879	4.229	0.0507644	0.288887
	ENSMUSG00000076612.9	Ighg2c	1.45042	3.07985	1.82325	0.18952	0.531467
	ENSMUSG00000076583.2	Igkv8-24	1.40355	0.925375	3.4909	0.0739586	0.344531
	ENSMUSG00000094546.2	Ighv1-26	1.40305	1.08009	4.14537	0.0529264	0.295129
	ENSMUSG00000028195.5	Ccn1	1.33061	8.35613	21.2647	0.000111489	0.0131102
	ENSMUSG00000025746.12	Il6	1.20902	1.28689	3.90348	0.0597887	0.313199
	ENSMUSG00000063415.13	Cyp26b1	1.20617	6.3365	2.43245	0.131934	0.452859
	ENSMUSG00000097836.2	Gm26903	1.20311	0.125646	10.3698	0.00365611	0.0798657
	ENSMUSG00000076580.4	Igkv8-27	1.15986	-0.146917	4.54398	0.0434704	0.266166
	ENSMUSG00000037974.17	Muc5ac	1.15068	2.49009	5.07058	0.0337562	0.233119
	ENSMUSG00000094075.2	Ighv1-80	1.14661	-0.131331	1.99941	0.170198	0.510082
	ENSMUSG00000094127.2	G530012D18Rik	1.14255	0.775558	2.79179	0.107736	0.414353
	ENSMUSG00000089722.3	Cd300ld5	1.13724	-0.296241	2.38673	0.13545	0.459015
	ENSMUSG00000079224.6	Gm6565	1.1353	0.997941	0.934191	0.343413	0.679644
	ENSMUSG00000028255.7	Clca1	1.12521	6.12625	1.6979	0.204924	0.547663
	ENSMUSG00000073125.11	Xlr3b	1.10868	3.35937	5.40174	0.0289017	0.217825
	ENSMUSG00000080888.4	Gm14387	1.1053	-0.211076	5.00503	0.0348215	0.23689
	ENSMUSG00000076613.5	Ighg2b	1.10246	2.46803	1.87974	0.183046	0.525188
	ENSMUSG00000054988.10	Agtr1b	1.09947	-0.214131	14.2431	0.000930461	0.038184
	ENSMUSG00000106073.2	Gm42892	1.09796	-0.307178	16.522	0.000447139	0.0280823
	ENSMUSG00000029380.12	Cxcl1	1.09272	0.894836	13.7828	0.00108538	0.040989
	ENSMUSG00000033730.5	Egr3	1.07133	3.14806	31.2988	9.29732e-06	0.00328897
	ENSMUSG00000101122.2	Gm17971	1.05273	0.00638031	13.7323	0.001104	0.0412671
	ENSMUSG00000102805.6	Gm37240	1.03916	0.705987	4.24168	0.0504455	0.287828
	ENSMUSG00000094694.7	Ighv1-9	1.03414	-0.336049	3.65961	0.0677469	0.330796
	ENSMUSG00000079259.3	Trim71	1.02557	-0.210661	8.14058	0.00877061	0.126337
	ENSMUSG00000087502.2	Gm16091	1.0179	1.04637	26.2945	3.00524e-05	0.00627624
	ENSMUSG00000076615.5	Ighg3	1.01395	1.94993	1.01066	0.324771	0.664728
	ENSMUSG00000035818.15	Plekhs1	1.00351	-0.387079	6.4329	0.0181213	0.17617
	ENSMUSG00000060183.8	Cxcl11	0.999543	0.0988649	2.74713	0.115056	0.426767
	ENSMUSG00000085912.3	Trp53cor1	0.971761	-0.213761	8.24	0.0084212	0.123288
	ENSMUSG00000085314.2	Gm14866	0.9589	-0.22918	15.1213	0.000857183	0.0376901
	ENSMUSG00000026628.14	Atf3	0.94462	5.19492	55.3601	1.1092e-07	0.000153849
	ENSMUSG00000081855.5	Rpl17-ps5	0.944182	0.111516	2.29765	0.142627	0.470132
	ENSMUSG00000003665.8	Has1	0.932262	1.84366	13.2198	0.00131418	0.0451091
	ENSMUSG00000055370.4	Gm9968	0.928285	-0.293239	7.37245	0.0120754	0.146406
	ENSMUSG00000028150.15	Rorc	0.928255	3.30278	7.18361	0.013084	0.151603
	ENSMUSG00000111118.2	Gm6545	0.920777	-0.285969	2.70041	0.113357	0.424299
	ENSMUSG00000089951.9	Zfp968-ps	0.919188	-0.155549	4.46193	0.0452497	0.271686
	ENSMUSG00000094006.3	Igkv4-59	0.910201	0.213929	2.8785	0.1027	0.404216
	ENSMUSG00000055148.8	Klf2	0.891893	7.93599	88.5047	1.59306e-09	9.20471e-06
	ENSMUSG00000055125.8	M5C1000I18Rik	0.890343	0.162176	5.5717	0.0267164	0.210405
	ENSMUSG00000115785.2	ENSMUSG00000115785.2	0.886008	-0.243133	4.21541	0.0511088	0.289706
	ENSMUSG00000078963.4	Hsbp1l1	0.881963	0.00236282	8.25142	0.00838208	0.122996
	ENSMUSG00000029685.16	Asb15	0.880969	-0.204896	9.79643	0.00454738	0.0899818
	ENSMUSG00000041695.3	Kcnj2	0.868652	4.53559	31.4092	9.07135e-06	0.00327589
	ENSMUSG00000085666.4	Tdg-ps2	0.852098	0.952459	8.40145	0.00788601	0.119372
	ENSMUSG00000006574.16	Slc4a1	0.849664	0.744069	5.34526	0.0296715	0.219761
	ENSMUSG00000064360.1	mt-Nd3	0.839891	4.73648	7.79983	0.0100944	0.134185
	ENSMUSG00000044288.7	Cnr1	0.828664	1.92783	31.5062	8.87754e-06	0.00327589
	ENSMUSG00000103966.2	Gm37120	0.824689	-0.210084	4.9406	0.0359052	0.239497
	ENSMUSG00000095620.8	Csta2	0.82319	0.0301732	7.62764	0.0108459	0.139503
	ENSMUSG00000044103.5	Il36g	0.822241	1.91135	2.02658	0.167436	0.506349
	ENSMUSG00000118049.2	Gm50103	0.820018	0.102948	12.2305	0.00185451	0.0564958
	ENSMUSG00000118138.2	Gm50322	0.807381	-0.241711	8.8529	0.00657774	0.108699
	ENSMUSG00000076569.4	Igkv5-39	0.805675	-0.355819	1.69803	0.204906	0.547663
	ENSMUSG00000073427.5	Gm4924	0.799003	1.63553	21.492	0.000104729	0.0126595
	ENSMUSG00000031725.9	Ces1f	0.798362	3.29543	1.42793	0.243775	0.590208
	ENSMUSG00000029054.9	Gabrd	0.789928	-0.0592197	3.80352	0.0629148	0.32022
	ENSMUSG00000026475.8	Rgs16	0.785723	1.52188	16.65	0.000429697	0.0275866
	ENSMUSG00000047146.18	Tet1	0.785553	2.42461	15.8478	0.000552665	0.0302205
	ENSMUSG00000109321.2	A330076H08Rik	0.777037	0.23642	5.80284	0.0240336	0.200674
	ENSMUSG00000059201.13	Lep	0.770923	1.1758	1.88366	0.182606	0.524489
	ENSMUSG00000063632.7	Sox11	0.769945	4.66269	28.031	1.97358e-05	0.00485929
	ENSMUSG00000064357.1	mt-Atp6	0.754541	7.19267	7.21985	0.0128835	0.151043
	ENSMUSG00000032487.9	Ptgs2	0.753957	3.98908	29.0862	1.53957e-05	0.00435572
	ENSMUSG00000090698.3	Apold1	0.752554	2.45876	11.1712	0.00271508	0.0687054
	ENSMUSG00000086515.3	Erich2os	0.748937	0.332596	11.4367	0.00246455	0.0650235
	ENSMUSG00000026826.14	Nr4a2	0.746324	3.8047	29.9714	1.25498e-05	0.00389328
	ENSMUSG00000076563.3	Igkv5-48	0.746203	-0.212557	1.68736	0.206288	0.549953
	ENSMUSG00000114172.2	Gm36298	0.73981	0.316777	8.59676	0.0072879	0.114757
	ENSMUSG00000103703.3	Gm42568	0.737077	-0.313933	7.94625	0.00950044	0.131956
	ENSMUSG00000033491.14	Prss35	0.73561	1.06803	12.0555	0.00197328	0.0579584
	ENSMUSG00000003849.9	Nqo1	0.729809	2.89069	2.8965	0.101689	0.402558
	ENSMUSG00000008658.17	Rbfox1	0.729428	0.100514	5.184	0.0319981	0.227224
	ENSMUSG00000039377.8	Hlx	0.727266	5.33073	52.5839	1.71283e-07	0.000201917
	ENSMUSG00000090264.2	Eif4ebp3	0.726368	0.347802	1.5923	0.21912	0.562867
	ENSMUSG00000047822.9	Angptl8	0.725648	1.11795	7.56857	0.0111177	0.140428
	ENSMUSG00000074570.15	Cass4	0.717024	4.08828	65.5878	2.53326e-08	4.87907e-05
	ENSMUSG00000027938.12	Creb3l4	0.712683	1.39942	18.788	0.00022549	0.0196415
	ENSMUSG00000112690.3	Gm2446	0.71266	0.240928	0.529979	0.473657	0.772273
	ENSMUSG00000032262.14	Elovl4	0.710234	0.0945833	1.07461	0.310236	0.651617
	ENSMUSG00000116883.2	Gm49700	0.709625	0.148018	11.6129	0.00231226	0.0625409
	ENSMUSG00000047330.9	Kcne4	0.705768	4.04804	25.6582	3.51947e-05	0.00693255
	ENSMUSG00000113427.2	Gm46378	0.703463	0.119931	5.79072	0.0241665	0.201218
	ENSMUSG00000095193.4	Gm20939	0.703074	1.38472	11.7337	0.00221388	0.0614007
	ENSMUSG00000078173.4	Lenep	0.699775	0.664388	1.3014	0.265211	0.611452
	ENSMUSG00002076161.1	Rn7sk	0.698745	0.946294	3.85208	0.0613736	0.316811
	ENSMUSG00000109764.2	Klkb1	0.698637	0.714515	7.66328	0.0106855	0.138535
	ENSMUSG00000032611.10	1700102P08Rik	0.697389	-0.235662	6.37081	0.0186255	0.177784
	ENSMUSG00000021587.6	Pcsk1	0.6933	0.331235	5.83108	0.0237269	0.199787
	ENSMUSG00000104388.2	Gm37033	0.69064	0.828377	8.67249	0.00706954	0.113002
	ENSMUSG00000102961.2	Gm19918	0.689785	1.21747	4.93692	0.0359683	0.239706
	ENSMUSG00000007591.16	Tssk4	0.682382	0.165957	8.50621	0.00755876	0.116881
	ENSMUSG00000102269.2	Gm7357	0.680982	0.137438	5.13517	0.0327422	0.230462
	ENSMUSG00000028794.14	A3galt2	0.676748	-0.0686577	4.92068	0.036248	0.240547
	ENSMUSG00000035448.10	Ccr3	0.67489	0.962607	2.73762	0.111028	0.420576
	ENSMUSG00000076501.3	Igkv2-137	0.672362	0.154171	1.10863	0.302864	0.646128
	ENSMUSG00000038216.8	Pnmt	0.672131	-0.293332	8.19893	0.0182123	0.176491
	ENSMUSG00000040287.10	Stac3	0.670716	0.475835	6.46291	0.017883	0.175322
	ENSMUSG00000035678.9	Tnfsf9	0.670257	2.58868	13.9133	0.00103878	0.0400983
	ENSMUSG00000090066.3	1110002E22Rik	0.668924	0.840406	4.32134	0.0484925	0.281503
	ENSMUSG00000112734.2	Gm47644	0.663096	0.478984	1.8225	0.189608	0.531467
	ENSMUSG00000030757.14	Zkscan2	0.662595	0.554171	5.62909	0.0260204	0.208342
	ENSMUSG00000116815.2	Gm49760	0.660132	0.517438	7.72352	0.0104202	0.136735
	ENSMUSG00000055560.9	Zfp459	0.655107	0.347363	7.84022	0.0099266	0.133853
	ENSMUSG00000069743.6	Zfp820	0.653669	2.26037	14.3662	0.000893229	0.0377484
	ENSMUSG00000015627.6	Gata5	0.653147	4.30605	13.3534	0.00125551	0.0444996
	ENSMUSG00000115344.2	Gm49364	0.651589	0.250488	2.05349	0.164752	0.502867
	ENSMUSG00000024190.8	Dusp1	0.646481	8.31088	6.60796	0.0167792	0.170387
	ENSMUSG00000069515.7	Lyz1	0.645196	9.05666	4.0232	0.0562739	0.30452
	ENSMUSG00000038418.8	Egr1	0.641811	7.18572	5.76968	0.0243994	0.201813
	ENSMUSG00000049723.15	Mmp12	0.639988	2.50876	6.51565	0.0174726	0.173565
	ENSMUSG00000024042.8	Sik1	0.637325	7.06896	74.7959	7.71098e-09	1.90946e-05
	ENSMUSG00000029378.6	Areg	0.6358	2.71903	11.0002	0.00289109	0.0711615
	ENSMUSG00000102353.2	Gm38345	0.633409	0.149483	5.93342	0.0226512	0.19505
	ENSMUSG00000024028.8	Tff2	0.632088	3.43903	2.62572	0.118207	0.432988
	ENSMUSG00000105349.2	Gm43604	0.631827	-0.122596	3.61562	0.0693071	0.33394
	ENSMUSG00000095630.3	Igkv6-23	0.63173	0.58036	1.54415	0.226002	0.571182
	ENSMUSG00000026819.16	Slc25a25	0.625412	5.61784	82.5596	3.07776e-09	1.33375e-05
	ENSMUSG00000091956.3	C2cd4b	0.621114	1.95439	11.6861	0.00225207	0.0618659
	ENSMUSG00000102649.2	Gm38021	0.620914	-0.13911	5.61726	0.0261622	0.20898
	ENSMUSG00000025893.9	Kbtbd3	0.620146	2.15987	12.0879	0.00195069	0.0576036
	ENSMUSG00000022602.15	Arc	0.618941	1.39695	7.09929	0.0135641	0.153585
	ENSMUSG00000104548.2	Gm43857	0.61757	2.71506	19.2232	0.000198611	0.0183124
	ENSMUSG00000032419.9	Tbx18	0.617462	0.647491	6.25001	0.0196517	0.181579
	ENSMUSG00000028681.12	Ptch2	0.616705	2.98613	17.3719	0.000344218	0.0248611
	ENSMUSG00000027737.11	Slc7a11	0.616395	1.7693	0.908316	0.35006	0.686185
	ENSMUSG00000079608.11	Stard6	0.615551	0.628388	9.97043	0.00425407	0.086145
	ENSMUSG00000025916.11	Ppp1r42	0.615415	0.452615	6.95663	0.0144213	0.158671
	ENSMUSG00000029135.11	Fosl2	0.614426	6.48796	119.398	8.43811e-11	1.46266e-06
	ENSMUSG00000097047.3	1110020A21Rik	0.614111	-0.189505	5.51539	0.0274193	0.213208
	ENSMUSG00000044377.4	Gm13080	0.610886	-0.270934	2.55277	0.123181	0.441321
	ENSMUSG00000096433.3	Zfp994	0.609169	2.92465	12.0993	0.00194278	0.0574679
	ENSMUSG00000109422.2	Gm45174	0.607184	-0.2732	3.2235	0.0851883	0.369718
	ENSMUSG00000063260.3	Syt10	0.604358	-0.376263	4.36656	0.0474218	0.278459
	ENSMUSG00000037813.14	D630003M21Rik	0.601621	1.78796	7.53494	0.0112758	0.141018
	ENSMUSG00000026398.15	Nr5a2	0.600538	0.45303	4.92823	0.0361176	0.240239
	ENSMUSG00000114117.2	Gm48795	0.599224	1.4903	2.61184	0.119135	0.434611
	ENSMUSG00000026358.14	Rgs1	0.595684	2.6133	3.15047	0.0885873	0.376273
	ENSMUSG00000091509.8	Gm17066	0.594401	1.34468	7.29043	0.0125025	0.149771
	ENSMUSG00000040229.12	Gpr34	0.594213	1.82464	12.0278	0.00199283	0.0580919
	ENSMUSG00000089756.3	Zfp966	0.592798	0.488042	2.34387	0.138849	0.464276
	ENSMUSG00000003545.4	Fosb	0.591942	4.58374	3.84477	0.0616028	0.317332
	ENSMUSG00000044501.18	Zfp758	0.590881	3.37884	10.4078	0.00360427	0.0794865
	ENSMUSG00000066000.13	Zfp979	0.588696	1.73232	3.87995	0.0605083	0.314687
	ENSMUSG00000058488.8	Kl	0.582289	-0.0489188	5.43006	0.0285242	0.216006
	ENSMUSG00000020423.7	Btg2	0.581444	7.97803	14.5705	0.000834979	0.0375164
	ENSMUSG00000021701.9	Plk2	0.575094	6.46642	28.2735	1.86325e-05	0.00468081
	ENSMUSG00000111933.2	Gm36660	0.574472	1.13419	14.569	0.000835387	0.0375164
	ENSMUSG00000094027.3	Gm21762	0.574095	0.00810616	1.34444	0.257655	0.603937
	ENSMUSG00000071267.12	Zfp942	0.573162	3.70159	12.1402	0.00191478	0.0571244
	ENSMUSG00000116895.2	Gm3435	0.570342	1.26798	3.4795	0.0744014	0.345778
	ENSMUSG00000025321.15	Itgb8	0.569456	0.542945	3.82734	0.0621533	0.318747
	ENSMUSG00000091119.3	Ccdc152	0.569275	0.932543	6.18083	0.0202675	0.183839
	ENSMUSG00000024986.13	Hhex	0.568587	4.59354	40.3162	1.44995e-06	0.000837781
	ENSMUSG00000104204.2	Gm37397	0.567723	-0.218814	3.34041	0.0800538	0.359216
	ENSMUSG00000042942.19	Greb1l	0.564833	0.264198	4.4256	0.0460637	0.273917
	ENSMUSG00000108456.2	4732496C06Rik	0.563683	2.8172	20.9494	0.000121663	0.0136058
	ENSMUSG00000118590.2	Gm15433	0.562533	-0.15287	0.943391	0.341092	0.678205
	ENSMUSG00000030359.15	Pzp	0.561294	-0.326554	4.31501	0.0486444	0.281819
	ENSMUSG00000048814.12	Lonrf2	0.557247	0.196852	3.86902	0.0608461	0.315497
	ENSMUSG00000069727.6	Zfp975	0.556866	3.29195	49.0297	3.06048e-07	0.000312061
	ENSMUSG00000117284.2	Gm7072	0.555592	3.85233	10.6477	0.0032946	0.0755364
	ENSMUSG00000120623.1	ENSMUSG00000120623.1	0.55554	4.74117	11.8145	0.00215054	0.0609108
	ENSMUSG00000089998.3	Phtf1os	0.555439	1.65619	1.39394	0.249307	0.595902
	ENSMUSG00000035202.9	Lars2	0.553719	7.15225	5.24923	0.0310333	0.223951
	ENSMUSG00000026227.12	2810459M11Rik	0.550693	0.208714	1.93066	0.177439	0.518673
	ENSMUSG00000073867.3	AA474408	0.546798	0.283002	7.88015	0.0097637	0.133324
	ENSMUSG00000035237.8	Lcat	0.546152	1.59526	9.11102	0.00593813	0.104275
	ENSMUSG00000106547.2	B230303O12Rik	0.545901	0.0256155	3.99753	0.0570073	0.306109
	ENSMUSG00000091183.6	Gm5141	0.545022	1.69471	8.44115	0.0077602	0.118099
	ENSMUSG00000044461.7	Shisa2	0.545008	3.02118	11.8961	0.00208867	0.0596457
	ENSMUSG00000020651.9	Slc26a4	0.543511	2.74439	2.62133	0.1185	0.433635
	ENSMUSG00000043807.7	Ly6g5b	0.543487	0.541109	3.90154	0.0598476	0.313369
	ENSMUSG00000044595.11	Dnd1	0.542704	0.79808	5.44547	0.028321	0.215797
	ENSMUSG00000078202.4	Nrarp	0.540876	5.78697	25.3864	3.76752e-05	0.00702793
	ENSMUSG00000108322.4	5430431A17Rik	0.538043	1.45793	3.66964	0.0673966	0.330028
	ENSMUSG00000113019.3	Gm47467	0.537596	1.91214	14.5133	0.00085086	0.0376901
	ENSMUSG00000031495.9	Cd209d	0.53622	0.00129723	2.02141	0.167958	0.507208
	ENSMUSG00000032131.17	Abcg4	0.536115	0.452741	3.07701	0.0921652	0.384036
	ENSMUSG00000073415.5	Gm10501	0.535491	0.185578	0.685238	0.415942	0.735183
	ENSMUSG00000073988.14	Ttpa	0.535224	1.75466	8.9428	0.00634677	0.107123
	ENSMUSG00000015619.11	Gata3	0.535123	3.9025	35.0582	4.1342e-06	0.00198139
	ENSMUSG00000024136.15	Dnase1l2	0.534379	2.43299	16.4344	0.000459509	0.0281453
	ENSMUSG00000070280.14	Slc22a14	0.532185	0.331913	5.46255	0.0280978	0.215399
	ENSMUSG00000030730.13	Atp2a1	0.53212	2.38074	0.729197	0.401584	0.726881
	ENSMUSG00000064354.1	mt-Co2	0.53179	5.41609	0.905972	0.350671	0.686668
	ENSMUSG00000062743.10	Zfp677	0.530974	2.56937	29.0352	1.55795e-05	0.00435572
	ENSMUSG00000070529.8	Wfdc10	0.530252	-0.1429	3.61883	0.0691919	0.33394
	ENSMUSG00000064358.1	mt-Co3	0.529919	5.99028	0.238492	0.629728	0.856873
	ENSMUSG00000112441.2	Gm48898	0.529397	0.369511	4.45867	0.0453221	0.271951
	ENSMUSG00000113149.2	Gm49383	0.528906	0.93644	1.6219	0.21502	0.55776
	ENSMUSG00000049929.8	Lpar4	0.52868	0.538365	2.70073	0.113337	0.424299
	ENSMUSG00000000562.6	Adora3	0.528008	0.614246	4.58019	0.0427103	0.26318
	ENSMUSG00000097093.4	C330013E15Rik	0.527104	-0.0676231	2.71852	0.112216	0.422769
	ENSMUSG00000072762.10	4930522L14Rik	0.526184	2.04942	10.1162	0.0040243	0.0841463
	ENSMUSG00000015134.16	Aldh1a3	0.524525	1.22697	3.94459	0.0585544	0.309197
	ENSMUSG00000096696.2	Zfp960	0.521542	2.63677	14.4687	0.000863477	0.0376901
	ENSMUSG00000023829.10	Slc22a1	0.521165	-0.367331	3.23238	0.0847852	0.368974
	ENSMUSG00000025981.14	Coq10b	0.521119	5.20487	24.18	5.12262e-05	0.00807232
	ENSMUSG00000118423.2	Lrrc70	0.520911	0.970749	5.13334	0.0327703	0.230462
	ENSMUSG00000028017.8	Egf	0.520055	0.598651	3.54126	0.0720389	0.340793
	ENSMUSG00000047730.18	Fcgbp	0.519951	3.38096	1.62739	0.21427	0.556761
	ENSMUSG00000102425.2	Gm26616	0.519322	-0.28379	3.5133	0.0730978	0.342176
	ENSMUSG00000041707.9	Tmem273	0.519155	1.46626	6.60029	0.0168356	0.170465
	ENSMUSG00000085543.2	Gm13568	0.518281	1.7469	3.89123	0.0601622	0.31377
	ENSMUSG00000087143.11	A830082K12Rik	0.515115	1.31406	6.05357	0.0214569	0.188792
	ENSMUSG00000057835.8	Zfp119a	0.513177	2.21421	11.2479	0.00263997	0.067895
	ENSMUSG00000035456.10	Prdm8	0.512845	2.27053	2.09612	0.160608	0.496723
	ENSMUSG00000094622.3	ENSMUSG00000094622.3	0.512426	2.68342	10.0032	0.00420118	0.0855737
	ENSMUSG00000102550.2	Gm8276	0.512224	0.479747	5.07869	0.033627	0.232931
	ENSMUSG00000017418.15	Arl5b	0.51157	5.27337	40.9243	1.29188e-06	0.000837781
	ENSMUSG00000020275.10	Rel	0.511334	4.67107	35.2661	3.95932e-06	0.00196088
	ENSMUSG00000107222.2	Gm43198	0.511294	1.52583	4.22514	0.0508622	0.289254
	ENSMUSG00000022144.5	Gdnf	0.508858	3.54692	19.9783	0.000159875	0.0162063
	ENSMUSG00000045404.17	Kcnk13	0.508408	2.36824	19.7657	0.000169877	0.0167309
	ENSMUSG00000109669.3	Gm45472	0.507875	1.52263	6.67222	0.0163144	0.168229
	ENSMUSG00000086212.9	Mkln1os	0.507653	0.0731232	2.68469	0.114358	0.425833
	ENSMUSG00000001494.7	Sost	0.50408	1.11768	2.58432	0.121	0.437783
	ENSMUSG00000060988.13	Galnt13	0.503927	1.15818	7.55875	0.0111636	0.140428
	ENSMUSG00000100005.9	B130024G19Rik	0.503913	3.63827	41.9526	1.06551e-06	0.000803025
	ENSMUSG00000105376.6	Gm36535	0.503899	0.858138	5.61485	0.0261912	0.209024
	ENSMUSG00000072844.7	G530011O06Rik	0.503555	1.17396	1.09367	0.306076	0.648526
	ENSMUSG00000097379.3	Gm26873	0.502623	0.380701	3.51799	0.0729189	0.341904
	ENSMUSG00000117300.2	Gm18736	0.499629	0.0670914	3.28333	0.0825149	0.364548
	ENSMUSG00000056260.16	Lrif1	0.498958	4.36504	22.9373	7.09098e-05	0.00967835
	ENSMUSG00000105928.2	Gm9256	0.498786	-0.347795	3.89605	0.062674	0.319527
	ENSMUSG00000073792.12	Alg6	0.498327	3.3349	25.775	3.41835e-05	0.00688996
	ENSMUSG00000079038.4	D130040H23Rik	0.497797	0.199552	3.89376	0.0600848	0.31377
	ENSMUSG00000027895.11	Kcnc4	0.496867	-0.209242	1.66761	0.208874	0.552177
	ENSMUSG00000054626.12	Xlr	0.495946	1.55442	6.05857	0.0214087	0.188758
	ENSMUSG00000078880.11	Gm14308	0.49525	0.0633445	1.05503	0.314591	0.655897
	ENSMUSG00000061100.6	Retnla	0.493843	7.52457	1.14618	0.294996	0.638226
	ENSMUSG00000047363.5	Cstad	0.493786	-0.198687	3.59287	0.07013	0.33581
	ENSMUSG00000033882.16	Rbm46	0.493468	0.631605	3.23915	0.0844793	0.368512
	ENSMUSG00000121378.1	ENSMUSG00000121378.1	0.492975	-0.190488	1.76212	0.196847	0.53868
	ENSMUSG00000078875.11	Gm14419	0.492782	0.884815	3.02938	0.0945738	0.389485
	ENSMUSG00000026630.10	Batf3	0.491289	1.46704	6.10329	0.0209832	0.1871
	ENSMUSG00000098196.2	Gm26964	0.491218	0.143797	0.521359	0.477237	0.774733
	ENSMUSG00000053347.16	Zfp943	0.490518	4.36244	16.4135	0.00046252	0.02823
	ENSMUSG00000026805.15	Barhl1	0.489628	-0.198137	4.34408	0.0611946	0.316452
	ENSMUSG00000101586.2	Gm29017	0.489142	-0.147328	3.80219	0.0629575	0.32022
	ENSMUSG00000063383.6	Zfp947	0.488306	0.730952	5.82024	0.023844	0.199958
	ENSMUSG00000086392.10	Mccc1os	0.488273	0.256949	4.52993	0.0437695	0.267113
	ENSMUSG00000044636.7	Csrnp2	0.488048	3.13106	27.914	2.02934e-05	0.00485929
	ENSMUSG00000097000.4	Gm17435	0.487033	0.368204	4.3789	0.0471342	0.277711
	ENSMUSG00000074635.4	3110070M22Rik	0.486463	0.184578	2.67385	0.115055	0.426767
	ENSMUSG00000102460.2	Gm38197	0.486325	0.743069	6.39158	0.0184552	0.177625
	ENSMUSG00000038253.7	Hoxa5	0.485639	5.29587	27.7657	2.1025e-05	0.00485929
	ENSMUSG00000030486.10	Zfp108	0.484159	1.46748	12.117	0.00193059	0.0572719
	ENSMUSG00000022358.8	Fbxo32	0.483555	4.53183	16.2897	0.000480788	0.0286391
	ENSMUSG00000046178.4	Nxph1	0.483414	-0.357415	1.90096	0.180683	0.52182
	ENSMUSG00000072763.3	5430403G16Rik	0.483262	1.54131	6.5963	0.016865	0.170465
	ENSMUSG00000025930.7	Msc	0.482594	0.879354	5.81331	0.0239193	0.200298
	ENSMUSG00000094335.3	Igkv1-117	0.481654	1.96994	1.36562	0.254039	0.600424
	ENSMUSG00000110159.2	Gm45501	0.481588	-0.0901117	2.35512	0.137947	0.463197
	ENSMUSG00000055210.5	Foxd2	0.481332	-0.131201	2.42026	0.132861	0.454152
	ENSMUSG00000082433.3	ENSMUSG00000082433.3	0.481084	1.54542	0.438097	0.514346	0.795846
	ENSMUSG00000097587.4	4930578M01Rik	0.48082	-0.117324	3.40161	0.0775084	0.353147
	ENSMUSG00000073208.13	Speer4c	0.479263	-0.118775	1.11198	0.30215	0.645645
	ENSMUSG00000086350.3	B230369F24Rik	0.478642	0.386319	2.81752	0.106212	0.41153
	ENSMUSG00000032064.18	Dixdc1	0.478501	4.86527	22.9619	7.04485e-05	0.00967835
	ENSMUSG00000050473.6	Slc35d3	0.475587	0.223471	3.36721	0.0789273	0.356469
	ENSMUSG00000027832.6	Ptx3	0.475459	1.40768	4.04133	0.0557625	0.3031
	ENSMUSG00000021127.8	Zfp36l1	0.475333	8.38296	30.4404	1.1278e-05	0.0038123
	ENSMUSG00000034394.15	Lif	0.475127	3.4645	11.5952	0.00232715	0.0625409
	ENSMUSG00000082051.2	Gm16072	0.474722	-0.352348	1.74335	0.199165	0.542052
	ENSMUSG00000044646.16	Zbtb7c	0.4741	2.58751	5.36298	0.0294276	0.219097
	ENSMUSG00000087691.2	Cd55os	0.473454	0.628066	5.16267	0.0323208	0.228393
	ENSMUSG00000047085.15	Lrrc4b	0.473	0.966249	2.00347	0.169782	0.509718
	ENSMUSG00000040364.9	Sec1	0.472727	1.36013	3.01358	0.0953892	0.391355
	ENSMUSG00000120995.1	Gm51425	0.472408	2.70001	16.3225	0.000475874	0.0285426
	ENSMUSG00000105419.2	Gm43205	0.471839	0.810391	8.97344	0.00627011	0.106704
	ENSMUSG00000019256.18	Ahr	0.471129	6.24212	17.0146	0.000383953	0.0264105
	ENSMUSG00000112640.2	Gm32687	0.470686	2.71356	7.72259	0.0104242	0.136735
	ENSMUSG00000087008.5	Gm5530	0.470582	1.63792	6.35969	0.0187175	0.177843
	ENSMUSG00000036144.7	Meox2	0.470251	4.54194	40.5112	1.39708e-06	0.000837781
	ENSMUSG00000120996.1	ENSMUSG00000120996.1	0.469311	0.765799	6.94941	0.0163845	0.168233
	ENSMUSG00000031327.11	Chic1	0.467922	2.76824	14.6982	0.000800681	0.0368143
	ENSMUSG00000078502.11	Zfp268	0.46712	1.53019	3.01601	0.095263	0.391023
	ENSMUSG00000085611.4	Ap3s1-ps1	0.467109	1.36862	5.0527	0.0340432	0.233797
	ENSMUSG00000100162.3	Gm20687	0.466863	-0.174736	1.74033	0.199542	0.542482
	ENSMUSG00000038583.14	Pln	0.465971	4.63951	3.29533	0.0819904	0.363298
	ENSMUSG00000031789.18	Cngb1	0.465492	0.865897	4.72969	0.039726	0.252054
	ENSMUSG00000061039.6	Or8b53	0.464598	1.19637	6.53381	0.0173338	0.173031
	ENSMUSG00000106087.2	Gm43609	0.46449	0.558581	4.80758	0.0382642	0.247305
	ENSMUSG00000071291.11	Zfp58	0.464053	3.17922	18.9028	0.000218038	0.0191851
	ENSMUSG00000108601.2	Gm44645	0.463459	0.335986	2.64341	0.117037	0.430613
	ENSMUSG00000089726.3	Mir17hg	0.463286	2.69571	5.98939	0.0220859	0.192137
	ENSMUSG00000069270.7	H2ac6	0.463073	-0.132064	1.76262	0.196785	0.538617
	ENSMUSG00000107017.2	Gm43196	0.463023	1.33954	7.29183	0.0124951	0.149771
	ENSMUSG00000051147.11	Nat2	0.462663	2.71319	16.4798	0.000453053	0.0281453
	ENSMUSG00000042717.6	Ppp1r3a	0.462066	1.34477	3.11926	0.0900874	0.378604
	ENSMUSG00000032531.16	Amotl2	0.461696	8.1359	31.4264	9.03663e-06	0.00327589
	ENSMUSG00000087166.10	L1td1	0.461331	-0.307906	2.03637	0.166454	0.505359
	ENSMUSG00000021187.15	Tc2n	0.460855	3.67147	10.366	0.00366135	0.0798657
	ENSMUSG00000052525.15	Spdya	0.459985	-0.260955	1.41416	0.245997	0.592079
	ENSMUSG00000079357.10	Gm11100	0.45993	0.597471	4.67815	0.0407275	0.255777
	ENSMUSG00000038155.12	Gstp2	0.459801	2.7188	4.74709	0.039394	0.251258
	ENSMUSG00000030895.10	Hpx	0.45927	1.53237	4.92008	0.0362583	0.240547
	ENSMUSG00000055200.8	Sertad3	0.458473	3.6511	33.3962	5.87529e-06	0.00242482
	ENSMUSG00000020105.10	Lrig3	0.458101	3.87791	25.6801	3.50022e-05	0.00693255
	ENSMUSG00000074867.5	Zfp808	0.45748	1.65373	3.73652	0.0651137	0.324894
	ENSMUSG00000035840.8	Lysmd3	0.457423	4.12274	15.3662	0.000644552	0.0325937
	ENSMUSG00000097804.2	Gm16685	0.45715	-0.247021	1.97809	0.172405	0.511461
	ENSMUSG00000069206.15	Zfp874a	0.456676	3.83835	30.2951	1.16564e-05	0.0038123
	ENSMUSG00000078994.10	Zfp429	0.456557	3.00518	24.0717	5.26786e-05	0.00821729
	ENSMUSG00000110018.3	5430437J10Rik	0.455987	0.185249	3.8214	0.062342	0.318973
	ENSMUSG00000111063.3	Zfp660	0.455802	1.57147	3.3905	0.0779636	0.354064
	ENSMUSG00000120287.1	ENSMUSG00000120287.1	0.455579	-0.128565	2.25611	0.146128	0.475108
	ENSMUSG00000087403.10	Kantr	0.455279	2.94831	16.9089	0.000396638	0.0270396
	ENSMUSG00000027849.20	Syt6	0.454909	0.919971	6.67474	0.0162965	0.168145
	ENSMUSG00000028003.7	Lrat	0.45443	6.40519	1.99326	0.170831	0.51015
	ENSMUSG00000099583.3	H3c4	0.453878	-0.270077	1.99311	0.170846	0.51015
	ENSMUSG00000020020.9	Usp44	0.45381	0.202118	4.42881	0.0459911	0.273917
	ENSMUSG00000074818.14	Pdzd7	0.453731	1.3914	7.38196	0.0120269	0.146163
	ENSMUSG00000020420.9	Zfp607a	0.452623	2.1419	10.0248	0.00416673	0.0853548
	ENSMUSG00000060843.12	Ctnna3	0.452311	-0.376385	1.84977	0.186446	0.528609
	ENSMUSG00000033972.10	Zfp944	0.452233	3.44566	17.877	0.000295477	0.022366
	ENSMUSG00000045871.6	Slitrk6	0.452154	1.67128	5.17428	0.0321446	0.227705
	ENSMUSG00000074521.10	Gm14327	0.452069	0.641661	3.28384	0.0824924	0.364548
	ENSMUSG00000037463.15	Fbxo27	0.451966	0.757419	3.35892	0.0792741	0.357197
	ENSMUSG00000109243.2	Gm45867	0.451731	1.45832	5.76603	0.02444	0.201813
	ENSMUSG00000100707.2	Gm28523	0.451498	2.08769	10.3578	0.00367271	0.0799784
	ENSMUSG00000056145.6	AI504432	0.450594	3.97587	12.1234	0.00192621	0.0572708
	ENSMUSG00000024427.8	Spry4	0.450462	5.4887	16.0565	0.000517357	0.0295782
	ENSMUSG00000059708.13	Akap17b	0.450245	2.37803	19.3986	0.000188782	0.0177699
	ENSMUSG00000112922.2	Gm47572	0.450178	-0.035737	1.91705	0.178917	0.519775
	ENSMUSG00000073821.12	8030451A03Rik	0.450115	-0.297754	2.60488	0.119604	0.435295
	ENSMUSG00000078495.11	Zfp984	0.44905	4.3425	7.45974	0.0116383	0.14328
	ENSMUSG00000083854.4	Dnajc19-ps	0.448623	0.391195	3.94108	0.0586588	0.30962
	ENSMUSG00000029304.15	Spp1	0.448183	6.67023	5.98205	0.0221592	0.192342
	ENSMUSG00000074826.11	Gm10767	0.447905	-0.0447392	4.44068	0.0517405	0.291855
	ENSMUSG00000024793.15	Tnfrsf25	0.447848	2.3411	9.19504	0.00574491	0.102872
	ENSMUSG00000045875.14	Adra1a	0.447559	4.03531	18.7479	0.000228158	0.0197745
	ENSMUSG00000042595.8	Fam199x	0.447435	2.89013	8.29402	0.00823781	0.121734
	ENSMUSG00000074646.12	6430550D23Rik	0.447259	0.329832	2.72327	0.111919	0.422109
	ENSMUSG00000085779.2	Atcayos	0.446784	0.265451	3.22117	0.0852942	0.369807
	ENSMUSG00000019787.10	Trdn	0.446693	1.72141	3.45096	0.0755228	0.348389
	ENSMUSG00000103738.2	Gm37652	0.445992	-0.382533	1.93299	0.177189	0.518202
	ENSMUSG00000030031.15	Kbtbd8	0.445418	1.53073	4.15936	0.0525575	0.293881
	ENSMUSG00000093485.2	Gm20708	0.445412	0.500269	0.337038	0.566954	0.823926
	ENSMUSG00000093577.2	Gm20632	0.445231	2.17218	10.6188	0.00333023	0.0758038
	ENSMUSG00000100510.9	Hand2os1	0.443972	0.365529	4.7565	0.0392159	0.25093
	ENSMUSG00000114053.3	Gm35330	0.441475	-0.130736	2.35922	0.13762	0.462611
	ENSMUSG00000029862.17	Clcn1	0.440752	-0.0309513	1.93519	0.176951	0.517888
	ENSMUSG00000086233.3	Gm11816	0.440485	0.748664	3.53034	0.0724502	0.341565
	ENSMUSG00000087377.3	AV099323	0.44035	0.422504	1.25341	0.273979	0.619267
	ENSMUSG00000046667.15	Rbm12b1	0.439765	3.88179	34.9492	4.22934e-06	0.00198139
	ENSMUSG00000112164.2	Gm19990	0.438528	2.51652	8.94326	0.00634562	0.107123
	ENSMUSG00000055323.7	Gm9967	0.438212	1.19042	4.05191	0.0554662	0.302265
	ENSMUSG00000113425.2	Gm48653	0.438184	1.0019	4.62442	0.0418019	0.259867
	ENSMUSG00000022676.8	Snai2	0.436664	3.6359	11.1306	0.00275578	0.0694313
	ENSMUSG00000092203.9	1110038B12Rik	0.43601	3.21844	17.1828	0.000364649	0.0257993
	ENSMUSG00000047227.6	Gm527	0.435056	1.02412	6.48085	0.0177422	0.17484
	ENSMUSG00000107278.2	Gm42600	0.435036	0.0769774	2.56507	0.122325	0.440189
	ENSMUSG00000081121.2	Gm12791	0.434557	0.58775	5.61243	0.0262204	0.209034
	ENSMUSG00000055733.7	Nap1l3	0.434013	1.60184	8.39741	0.00789894	0.119372
	ENSMUSG00000024124.11	Prss30	0.433725	0.568703	4.08627	0.0545167	0.300087
	ENSMUSG00000060240.13	Cend1	0.433288	0.0547632	5.42355	0.0574342	0.307178
	ENSMUSG00000028188.14	Spata1	0.432322	0.822617	4.16045	0.052529	0.293817
	ENSMUSG00000022667.19	Cd200r1	0.432289	1.86506	5.70762	0.0251006	0.204731
	ENSMUSG00000086382.3	Chrna1os	0.431914	0.0202024	2.31811	0.14094	0.467207
	ENSMUSG00000024379.5	Tslp	0.43189	2.48624	7.5262	0.0113173	0.141336
	ENSMUSG00000098650.2	Commd1b	0.431886	4.22275	1.87237	0.183875	0.525985
	ENSMUSG00000083672.2	Kpna2-ps	0.431771	0.839358	0.64417	0.430079	0.743103
	ENSMUSG00000006586.16	Runx1t1	0.431291	2.69854	14.3085	0.000910465	0.0378938
	ENSMUSG00000020300.15	Cpeb4	0.429923	5.42298	8.58718	0.00731605	0.114757
	ENSMUSG00000106951.2	5930430L01Rik	0.429384	2.10341	9.84111	0.00447	0.0893691
	ENSMUSG00000116802.3	Gm5165	0.429384	2.51846	12.6935	0.00157631	0.0510724
	ENSMUSG00000043099.6	Hic1	0.429133	4.92496	15.6722	0.000584412	0.031266
	ENSMUSG00000100862.2	Gm10925	0.428107	11.3795	7.19393	0.0130266	0.151511
	ENSMUSG00000039496.9	Cdnf	0.427372	1.57428	6.27354	0.019447	0.181039
	ENSMUSG00000036832.6	Lpar3	0.426735	4.58253	15.435	0.000630466	0.0323328
	ENSMUSG00000117879.2	2310015A16Rik	0.426278	-0.339368	2.2751	0.144516	0.472737
	ENSMUSG00000002266.18	Zim1	0.426144	-0.341543	1.60062	0.217958	0.561381
	ENSMUSG00000050921.13	P2ry10	0.425964	3.32502	13.1726	0.00133567	0.0456655
	ENSMUSG00000107134.2	Gm42528	0.425728	3.54317	13.3994	0.00123593	0.0441725
	ENSMUSG00000083246.2	Gm11839	0.425263	0.295512	1.83248	0.188443	0.531221
	ENSMUSG00000035566.8	Pcdh17	0.425079	5.131	6.21247	0.0199833	0.183047
	ENSMUSG00000027470.10	Mylk2	0.42494	0.0759023	1.37874	0.251833	0.598474
	ENSMUSG00000045613.10	Chrm2	0.424629	4.14282	6.87791	0.0149197	0.160922
	ENSMUSG00000052137.12	Rbm12b2	0.424511	4.61972	41.623	1.13299e-06	0.000818302
	ENSMUSG00000121339.1	ENSMUSG00000121339.1	0.424425	0.086793	0.320109	0.576792	0.829926
	ENSMUSG00000037872.6	Ackr1	0.424372	0.0376651	1.66886	0.208709	0.551952
	ENSMUSG00000109841.4	E330011O21Rik	0.423837	0.321986	1.98248	0.171948	0.511044
	ENSMUSG00000046688.15	Tifa	0.423369	3.70234	16.0874	0.000512349	0.0294943
	ENSMUSG00000050447.16	Lypd6	0.42298	0.519954	3.79568	0.0631676	0.320723
	ENSMUSG00000048138.11	Dmrt2	0.422871	0.921501	3.26031	0.0835317	0.36634
	ENSMUSG00000032641.19	Gpr19	0.422846	2.23986	12.1355	0.00191799	0.0571244
	ENSMUSG00000114196.2	Gm47547	0.422626	3.0963	5.46088	0.0281194	0.215399
	ENSMUSG00000020650.16	Bcap29	0.422572	4.35846	22.5209	7.92369e-05	0.0104847
	ENSMUSG00000041633.15	Kctd12b	0.421857	4.3188	16.7217	0.000420253	0.0273141
	ENSMUSG00000052212.7	Cd177	0.42177	3.60466	2.53305	0.124568	0.443288
	ENSMUSG00000045294.12	Insig1	0.421703	6.62554	28.4559	1.78462e-05	0.00454921
	ENSMUSG00000096795.5	Zfp433	0.421495	2.3045	4.73585	0.0396082	0.251568
	ENSMUSG00000074158.10	Zfp976	0.421275	3.4455	14.88	0.00075447	0.0358483
	ENSMUSG00000043719.15	Col6a6	0.420489	0.266973	1.86128	0.185131	0.527371
	ENSMUSG00000103309.2	BC037039	0.419939	1.59516	1.92625	0.177917	0.519074
	ENSMUSG00000048368.10	Omd	0.419379	1.32617	3.55644	0.0714715	0.3397
	ENSMUSG00000097015.3	Gm26705	0.41871	-0.224792	2.14793	0.155738	0.488078
	ENSMUSG00000115756.2	Gm49519	0.418177	0.357786	2.69573	0.113654	0.424628
	ENSMUSG00000039628.10	Hs3st6	0.418094	1.35196	7.28222	0.0125462	0.150061
	ENSMUSG00000030329.12	Pianp	0.417893	1.37577	3.51114	0.0731803	0.342238
	ENSMUSG00000019813.17	Cep57l1	0.417593	2.42565	10.7681	0.00315022	0.0740921
	ENSMUSG00000073590.4	3222401L13Rik	0.417589	2.34662	11.4439	0.00245811	0.0649814
	ENSMUSG00000118281.2	Gm50242	0.417403	0.352441	2.20103	0.15093	0.480834
	ENSMUSG00000050587.15	Lrrc4c	0.417243	1.82513	4.5795	0.0427245	0.26318
	ENSMUSG00000032816.16	Igdcc4	0.417105	1.93823	5.94598	0.022523	0.194306
	ENSMUSG00000111656.2	Gm47232	0.417083	0.709325	4.42425	0.0460942	0.274005
	ENSMUSG00000090021.3	Gm6493	0.416815	0.0682633	1.30447	0.264662	0.611013
	ENSMUSG00000102038.2	Gm12345	0.416615	0.864839	3.10663	0.0907026	0.380135
	ENSMUSG00000049709.5	Nlrp10	0.416483	0.98077	3.12724	0.0897012	0.378604
	ENSMUSG00000100281.2	4930422M22Rik	0.415977	0.658436	2.51241	0.126038	0.445685
	ENSMUSG00000112964.3	E430024I08Rik	0.415692	3.67839	20.9227	0.000122569	0.0136194
	ENSMUSG00000075027.12	4631405J19Rik	0.415577	-0.0122611	2.69034	0.113997	0.42506
	ENSMUSG00000031870.17	Pgr	0.414679	1.73124	3.66673	0.0674979	0.330324
	ENSMUSG00000121092.1	ENSMUSG00000121092.1	0.414137	2.19628	1.98704	0.171474	0.510799
	ENSMUSG00000022012.10	Enox1	0.414137	-0.19529	2.438	0.131514	0.45257
	ENSMUSG00000042097.18	Zfp239	0.414059	0.902054	5.77089	0.0243858	0.201813
	ENSMUSG00000112907.2	Gm47015	0.413928	2.41653	6.01085	0.0218733	0.191053
	ENSMUSG00000110444.3	Gm10033	0.413757	3.66772	21.0983	0.000116738	0.0131398
	ENSMUSG00000075307.4	Klhl41	0.413679	1.4446	1.77036	0.195839	0.537202
	ENSMUSG00000060985.16	Tdrd5	0.413326	0.539905	2.39742	0.134619	0.457455
	ENSMUSG00000048899.9	Rimkla	0.413117	0.155681	1.33685	0.258967	0.605059
	ENSMUSG00000028528.18	Dnajc6	0.412971	1.50982	7.78674	0.0101495	0.134402
	ENSMUSG00000113898.2	Gm19144	0.412844	-0.263955	1.78231	0.194388	0.535801
	ENSMUSG00000026276.21	ENSMUSG00000026276.21	0.412647	4.47634	14.7949	0.000775732	0.0361466
	ENSMUSG00000085761.3	4930455G09Rik	0.412589	-0.129662	2.47512	0.128749	0.448769
	ENSMUSG00000026255.16	Efhd1	0.412567	0.983354	2.4515	0.1305	0.45141
	ENSMUSG00000003032.9	Klf4	0.411439	7.68633	15.1289	0.000695867	0.0345296
	ENSMUSG00000028148.12	Them5	0.411183	0.219204	0.123537	0.728295	0.900193
	ENSMUSG00000050503.10	Fbxl22	0.409921	2.40757	6.83729	0.0151843	0.162573
	ENSMUSG00000019761.11	Krt10	0.409825	1.58723	6.4731	0.0178029	0.175239
	ENSMUSG00000059741.14	Myl3	0.409478	2.04758	1.34103	0.258243	0.603937
	ENSMUSG00000034765.7	Dusp5	0.409195	3.98619	17.5053	0.00033054	0.0240738
	ENSMUSG00000024842.9	Cabp4	0.408966	0.120778	3.04883	0.0987941	0.398162
	ENSMUSG00000032265.15	Tent5a	0.408807	4.74023	16.0275	0.000522119	0.0295782
	ENSMUSG00000120507.1	ENSMUSG00000120507.1	0.40859	2.02942	7.83818	0.009935	0.133853
	ENSMUSG00000086918.3	4930429F24Rik	0.408444	1.74234	4.24012	0.0504846	0.287957
	ENSMUSG00000086806.2	Gm13054	0.408243	1.09315	0.619867	0.438801	0.749036
	ENSMUSG00000094942.8	Gm3604	0.40797	0.925367	3.79084	0.0633244	0.321143
	ENSMUSG00000037573.6	Tob1	0.407543	5.63173	41.2715	1.21011e-06	0.000837781
	ENSMUSG00000098206.2	Mir181a-1hg	0.407237	1.17836	3.14552	0.0888231	0.376906
	ENSMUSG00000033446.8	Lpar6	0.407092	4.02757	18.0487	0.000280663	0.0223166
	ENSMUSG00000035868.10	Zfp983	0.405943	2.87616	10.9468	0.00294858	0.0718856
	ENSMUSG00000090641.3	Zfp712	0.40593	2.18522	6.19438	0.0201452	0.183305
	ENSMUSG00000034818.18	Celf5	0.405889	-0.122371	1.44466	0.241109	0.587724
	ENSMUSG00000061825.11	Ces2c	0.404997	-0.335243	1.96084	0.174215	0.514192
	ENSMUSG00000020962.15	Gtf2a1	0.404944	5.48039	32.6724	6.86982e-06	0.0027064
	ENSMUSG00000075304.3	Sp5	0.404667	1.89684	6.87357	0.0149478	0.160935
	ENSMUSG00000031079.13	Zfp300	0.403749	0.50852	2.45756	0.130048	0.450761
	ENSMUSG00000021379.3	Id4	0.402956	3.44006	9.16925	0.00580348	0.103495
	ENSMUSG00000029832.17	Nfe2l3	0.402212	2.38898	7.57943	0.0110672	0.140428
	ENSMUSG00000071540.5	3425401B19Rik	0.40194	1.72586	2.88771	0.102181	0.403366
	ENSMUSG00000001095.6	Slc13a2	0.401636	0.596514	1.31128	0.26345	0.610133
	ENSMUSG00000093651.2	Gm5873	0.400386	0.551404	3.40556	0.0773471	0.353104
	ENSMUSG00000068860.6	Gm128	0.399984	-0.0752426	2.32282	0.140555	0.466829
	ENSMUSG00000029861.18	Fam131b	0.399652	0.0843198	2.44379	0.131078	0.4518
	ENSMUSG00000116275.2	ENSMUSG00000116275.2	0.399126	6.50172	0.309448	0.583167	0.833833
	ENSMUSG00000064177.9	Ghrl	0.397985	-0.25788	1.25034	0.274552	0.619915
	ENSMUSG00000046561.10	Arsj	0.397972	1.45946	6.36124	0.0187047	0.177843
	ENSMUSG00000034570.13	Inpp5j	0.397855	1.75301	2.47881	0.128477	0.448724
	ENSMUSG00000051341.7	Zfp52	0.397313	3.33533	14.4886	0.000857831	0.0376901
	ENSMUSG00000094446.2	Gm6344	0.396843	1.93483	1.34225	0.258034	0.603937
	ENSMUSG00000078546.9	Zfp995	0.396232	2.12738	6.76211	0.0156879	0.165612
	ENSMUSG00000049516.10	Spty2d1	0.395921	5.15391	24.7481	4.42805e-05	0.00738037
	ENSMUSG00000043929.17	Klhl15	0.395367	2.59931	8.10546	0.00889777	0.127361
	ENSMUSG00000044162.13	Tnip3	0.39466	1.43667	2.36036	0.137529	0.462611
	ENSMUSG00000039395.9	Mreg	0.394356	2.23594	4.19228	0.0517011	0.29174
	ENSMUSG00000001014.7	Icam4	0.394043	-0.0864538	2.56374	0.135344	0.458794
	ENSMUSG00000001520.13	Nrip2	0.393641	-0.203547	1.43534	0.242589	0.588979
	ENSMUSG00000049038.4	Mterf2	0.393267	2.69271	11.4318	0.00246894	0.0650405
	ENSMUSG00000034460.10	Six4	0.393092	3.0788	6.74125	0.0158309	0.166237
	ENSMUSG00000046997.6	Spsb4	0.392989	0.101395	2.41367	0.133365	0.455339
	ENSMUSG00000032796.9	Lama1	0.392775	1.54034	0.880675	0.357363	0.691853
	ENSMUSG00000023882.16	Zfp54	0.392709	2.82322	12.4262	0.0017309	0.0548508
	ENSMUSG00000098055.3	Gm26947	0.392571	-0.354399	0.98718	0.330342	0.670195
	ENSMUSG00000050395.10	Tnfsf15	0.391623	1.99614	8.45601	0.00771366	0.118013
	ENSMUSG00000040896.17	Kcnd3	0.389786	1.49227	5.12853	0.0328448	0.230507
	ENSMUSG00000025094.9	Slc18a2	0.389575	1.49	5.77415	0.0243497	0.201813
	ENSMUSG00000050520.5	Cldn8	0.389388	1.94251	6.2653	0.0195185	0.181261
	ENSMUSG00000085894.2	Gm15832	0.389094	1.42125	3.99701	0.0570225	0.306109
	ENSMUSG00000040710.11	St8sia4	0.388855	4.86748	3.78358	0.0635604	0.32147
	ENSMUSG00000076431.5	Sox4	0.38882	5.68193	6.6817	0.016247	0.167934
	ENSMUSG00000084235.3	Gm15421	0.388654	2.26232	5.94518	0.0225311	0.194306
	ENSMUSG00000030156.6	Cd69	0.388576	2.99447	4.51935	0.0439962	0.267871
	ENSMUSG00000018427.9	Ypel2	0.387898	4.56908	14.0853	0.00098067	0.0388103
	ENSMUSG00000097327.9	E030030I06Rik	0.387738	0.950772	4.25634	0.0500796	0.286702
	ENSMUSG00000096549.10	Prickle4	0.387714	-0.0941333	0.816524	0.375177	0.705789
	ENSMUSG00000112778.2	Gm33677	0.387612	-0.233562	1.43696	0.242331	0.588891
	ENSMUSG00000121129.1	ENSMUSG00000121129.1	0.38715	0.749274	1.23592	0.277268	0.62254
	ENSMUSG00000059921.16	Unc5c	0.386775	3.86259	21.4768	0.000105167	0.0126595
	ENSMUSG00000103520.2	1110025M09Rik	0.386736	1.15849	3.90878	0.0596278	0.312691
	ENSMUSG00000055430.5	Nap1l5	0.385766	0.725128	3.74012	0.0649935	0.324753
	ENSMUSG00000071302.11	2610044O15Rik8	0.385654	3.63322	15.7733	0.00056589	0.0306536
	ENSMUSG00000058816.6	Ppp1r2-ps3	0.385458	-0.221328	0.844589	0.36723	0.70051
	ENSMUSG00000043705.8	Capn13	0.384736	0.272662	1.38194	0.251299	0.597943
	ENSMUSG00000085614.3	1700123M08Rik	0.384424	1.37949	6.37644	0.0185792	0.177666
	ENSMUSG00000029638.18	Glcci1	0.384001	1.8962	1.12361	0.299691	0.642569
	ENSMUSG00000024340.16	Btnl2	0.383894	-0.317666	3.13233	0.142787	0.470364
	ENSMUSG00000031880.8	Rrad	0.383374	3.68773	12.9991	0.00141783	0.0470816
	ENSMUSG00000024558.13	Mapk4	0.383323	0.266899	3.6264	0.0717363	0.340303
	ENSMUSG00000035148.5	Gpr33	0.383272	0.131083	1.93131	0.177369	0.518556
	ENSMUSG00000070533.12	Wfdc8	0.383171	2.11796	6.66586	0.0163597	0.168233
	ENSMUSG00000036502.15	Tmem255a	0.38279	0.337987	1.99709	0.170437	0.51015
	ENSMUSG00000045441.6	Gprin3	0.382171	2.76699	6.53099	0.0173552	0.173031
	ENSMUSG00000097471.10	5830432E09Rik	0.381799	0.692857	3.08395	0.0918199	0.383115
	ENSMUSG00000032204.14	Aqp9	0.381555	0.998853	2.87812	0.102721	0.404216
	ENSMUSG00000113311.2	Gm47428	0.381427	0.542894	0.753525	0.393957	0.720763
	ENSMUSG00000046352.8	Gjb2	0.381319	2.88479	2.84027	0.104886	0.40911
	ENSMUSG00000039476.14	Prrx2	0.381098	0.396563	2.17626	0.15315	0.484145
	ENSMUSG00000117183.2	Gm20008	0.379925	2.18888	6.09648	0.0210474	0.187274
	ENSMUSG00000009633.4	G0s2	0.379476	6.00846	13.608	0.00115137	0.0423544
	ENSMUSG00000096974.4	Gm26881	0.37878	-0.00879472	2.06454	0.163666	0.501775
	ENSMUSG00000111761.3	9230112J17Rik	0.378586	0.424785	3.2814	0.0825994	0.364548
	ENSMUSG00000112082.3	Gm35035	0.378337	-0.270037	1.44849	0.240504	0.586756
	ENSMUSG00000064337.1	mt-Rnr1	0.378052	7.23728	11.2216	0.00266541	0.0679445
	ENSMUSG00000056592.15	Zfp658	0.377867	3.21427	14.4167	0.000878436	0.0376901
	ENSMUSG00000050097.7	Ces2b	0.377752	1.7463	4.93572	0.0359888	0.239748
	ENSMUSG00000114753.2	Gm34059	0.3776	0.86919	1.51861	0.229763	0.574622
	ENSMUSG00000005483.11	Dnajb1	0.377187	6.24972	10.0759	0.00408646	0.0849477
	ENSMUSG00000044150.13	Bclaf3	0.377131	3.31694	14.8785	0.000754853	0.0358483
	ENSMUSG00000104301.4	Wdr49	0.37689	-0.343606	1.17688	0.288766	0.633305
	ENSMUSG00000006542.14	Prkag3	0.376796	2.8638	6.4137	0.0182756	0.176685
	ENSMUSG00000000078.8	Klf6	0.376388	7.7398	32.7381	6.77243e-06	0.0027064
	ENSMUSG00000081010.4	Gm13880	0.375925	-0.236402	1.67026	0.208525	0.551952
	ENSMUSG00000003469.10	Phyhip	0.375782	0.819844	1.21441	0.281387	0.626453
	ENSMUSG00000095258.4	Gm2163	0.37514	-0.412067	0.329871	0.571078	0.825955
	ENSMUSG00000038233.11	Gask1a	0.374805	3.38233	9.57416	0.00495472	0.0947771
	ENSMUSG00000074865.12	ENSMUSG00000074865.12	0.374325	2.49127	5.55926	0.0268699	0.211204
	ENSMUSG00000025001.12	Hells	0.374057	2.14116	5.77006	0.0243952	0.201813
	ENSMUSG00000034919.3	Ttc22	0.373997	1.31482	2.44576	0.13093	0.451557
	ENSMUSG00000026064.17	ENSMUSG00000026064.17	0.373597	1.95583	2.07223	0.162915	0.500792
	ENSMUSG00000033900.14	Map9	0.373376	2.97336	13.3588	0.00125317	0.0444996
	ENSMUSG00000030322.13	Mbd4	0.372903	2.90878	14.3552	0.000896489	0.0377484
	ENSMUSG00000112160.2	BC024063	0.372856	1.44803	2.35892	0.137644	0.462611
	ENSMUSG00000045382.7	Cxcr4	0.372855	6.12642	10.8433	0.0030636	0.0730461
	ENSMUSG00000019768.17	Esr1	0.3724	1.43969	2.06243	0.163873	0.502134
	ENSMUSG00000030324.9	Rho	0.372322	0.101308	1.85649	0.185677	0.528389
	ENSMUSG00000027983.14	Cyp2u1	0.371987	1.34472	3.95072	0.058373	0.309134
	ENSMUSG00000087461.3	C230014O12Rik	0.371281	0.0429896	1.82311	0.189537	0.531467
	ENSMUSG00000036095.12	Dgkb	0.370988	1.1188	3.80286	0.0629359	0.32022
	ENSMUSG00000031097.16	Tnni2	0.370918	1.2687	0.335901	0.567604	0.824082
	ENSMUSG00000003541.7	Ier3	0.370578	7.05357	15.911	0.00054171	0.03
	ENSMUSG00000083019.3	Gm6222	0.370335	0.660915	2.08925	0.161267	0.497604
	ENSMUSG00000053164.7	Gpr21	0.369871	0.0910506	1.60204	0.21776	0.561203
	ENSMUSG00000085334.8	Gm12940	0.369231	3.59949	9.45544	0.00518854	0.0978652
	ENSMUSG00000025815.14	Dhtkd1	0.368755	1.4694	6.23725	0.0197637	0.18222
	ENSMUSG00000064179.14	Tnnt1	0.368585	0.678448	5.08472	0.0482998	0.281043
	ENSMUSG00000074829.11	2010315B03Rik	0.368194	4.07267	7.27294	0.0125958	0.150061
	ENSMUSG00000078995.11	Zfp456	0.367949	2.0095	4.56437	0.0430405	0.264374
	ENSMUSG00000035109.15	Shc4	0.367931	0.312795	2.57578	0.121586	0.438622
	ENSMUSG00000032363.16	Adamts7	0.36717	2.10501	8.69634	0.00700228	0.112696
	ENSMUSG00000035834.12	Polr3g	0.367012	2.21928	4.44475	0.0456327	0.272541
	ENSMUSG00000120847.1	ENSMUSG00000120847.1	0.36643	-0.10853	0.421384	0.52241	0.799955
	ENSMUSG00000053297.15	AI854703	0.366296	0.440732	1.43902	0.242004	0.588556
	ENSMUSG00000115124.2	Gm49201	0.366231	0.225076	1.74045	0.199526	0.542482
	ENSMUSG00000092325.3	Gm18284	0.365954	0.904046	3.3772	0.0785125	0.355336
	ENSMUSG00000108736.2	Gm45151	0.365855	0.103582	2.10117	0.160125	0.495849
	ENSMUSG00000115624.2	Gm49204	0.365766	-0.258986	1.41375	0.246062	0.592149
	ENSMUSG00000096916.8	Zfp850	0.365525	1.81171	7.16397	0.0131942	0.152079
	ENSMUSG00000068134.14	Zfp120	0.365401	3.88154	9.19948	0.0057349	0.102872
	ENSMUSG00000114255.2	Gm10734	0.365356	2.2432	6.2117	0.0199901	0.183047
	ENSMUSG00000109305.2	Smim38	0.365181	0.839793	3.16615	0.0878444	0.374769
	ENSMUSG00000025997.14	Ikzf2	0.365029	2.43118	9.38902	0.00532462	0.0995958
	ENSMUSG00000041616.10	Nppa	0.364823	4.69675	0.366887	0.55039	0.814741
	ENSMUSG00000028525.17	Pde4b	0.364369	6.98813	6.69263	0.0161697	0.167762
	ENSMUSG00000100594.3	2810414N06Rik	0.364367	0.797711	3.31565	0.0811109	0.361315
	ENSMUSG00000097167.3	Gm16740	0.364276	2.42846	9.81498	0.00451507	0.089668
	ENSMUSG00000114184.2	Gm7143	0.363959	0.172643	1.19435	0.285299	0.629824
	ENSMUSG00000043614.14	Vps37d	0.363805	1.22496	5.69905	0.0251992	0.205168
	ENSMUSG00000032841.16	Prr5l	0.363781	5.23645	15.5754	0.000602748	0.0317555
	ENSMUSG00000042851.18	Zc3h6	0.363728	2.89711	4.67707	0.0407488	0.255777
	ENSMUSG00000093575.2	Gm20695	0.363648	0.122655	0.924595	0.345857	0.682063
	ENSMUSG00000025779.11	Ly96	0.363456	1.67129	6.26853	0.0194905	0.181261
	ENSMUSG00000025658.17	Cnksr2	0.363101	0.285412	2.36715	0.13699	0.461702
	ENSMUSG00000095990.2	Zfp97	0.36308	3.14755	8.67252	0.00706947	0.113002
	ENSMUSG00000063172.14	Hspb11	0.362964	2.34465	10.8066	0.00310552	0.0735398
	ENSMUSG00000119584.1	Rn18s-rs5	0.362504	9.58963	2.93793	0.0994062	0.399237
	ENSMUSG00000105868.2	Gm43766	0.361766	0.597225	2.00341	0.169788	0.509718
	ENSMUSG00000032392.12	Parp16	0.360976	3.35044	11.7872	0.00217175	0.0611005
	ENSMUSG00000097209.3	AU022754	0.360652	-0.392821	1.20395	0.283418	0.627749
	ENSMUSG00000040809.11	Chil3	0.360038	8.89479	2.8813	0.102542	0.40399
	ENSMUSG00000118383.2	Gm50321	0.359924	2.95009	8.53523	0.00747076	0.116455
	ENSMUSG00000117037.2	Gm50433	0.359621	-0.271875	1.00633	0.325788	0.665339
	ENSMUSG00000031385.15	Plxnb3	0.359614	0.641014	2.71083	0.112699	0.423575
	ENSMUSG00000030528.13	Blm	0.359407	1.74563	4.97145	0.0353817	0.23827
	ENSMUSG00000043618.10	Eif5al3-ps	0.359114	0.270948	3.91219	0.0874487	0.374063
	ENSMUSG00000105509.2	C130013H08Rik	0.358896	0.982855	2.1192	0.158416	0.493794
	ENSMUSG00000071266.14	Zfp946	0.358741	3.50167	12.598	0.00162977	0.0524128
	ENSMUSG00000020205.9	Phlda1	0.358677	6.11868	13.7621	0.00109296	0.0410962
	ENSMUSG00000093954.9	Gm16867	0.358327	2.73435	1.00737	0.325543	0.665131
	ENSMUSG00000042797.10	Aqp11	0.358106	2.10142	4.00684	0.0567401	0.305825
	ENSMUSG00000073236.6	2500004C02Rik	0.357447	2.6495	6.36383	0.0186832	0.177843
	ENSMUSG00000079012.12	Serpina3m	0.356678	1.17818	2.58581	0.120899	0.43769
	ENSMUSG00000039518.8	Cdsn	0.356631	1.65302	0.33295	0.569299	0.82496
	ENSMUSG00000020290.15	Xpo1	0.356531	6.33542	12.7442	0.00154877	0.0503683
	ENSMUSG00000121445.1	ENSMUSG00000121445.1	0.356513	3.81504	11.0503	0.00283823	0.0706865
	ENSMUSG00000022408.8	Fam83f	0.356511	0.81499	1.61925	0.215383	0.557981
	ENSMUSG00000074715.4	Ccl28	0.356094	0.286574	1.47447	0.236451	0.58269
	ENSMUSG00000026721.17	Rabgap1l	0.356076	6.54891	13.4212	0.00122682	0.0440283
	ENSMUSG00000026175.13	Vil1	0.355348	0.297319	2.14495	0.156013	0.488553
	ENSMUSG00000033717.7	Adra2a	0.354868	0.913114	1.36396	0.254321	0.6006
	ENSMUSG00000068463.6	B630019A10Rik	0.354792	0.229416	1.98451	0.171737	0.511044
	ENSMUSG00000018209.16	Stk4	0.3545	6.98552	23.4121	6.2558e-05	0.00888837
	ENSMUSG00000033213.17	AA467197	0.354472	1.50754	1.78466	0.194105	0.535512
	ENSMUSG00000078779.5	Zfp59	0.35437	3.07696	13.9004	0.00104329	0.0400983
	ENSMUSG00000090273.4	Prr22	0.354236	-0.162842	1.83483	0.188171	0.531143
	ENSMUSG00000002847.8	Pla1a	0.354211	0.903669	1.33931	0.258541	0.60439
	ENSMUSG00000047369.18	Dnah14	0.354186	1.1365	2.15482	0.155104	0.486971
	ENSMUSG00000079415.3	Cntf	0.354144	0.369689	1.30583	0.264419	0.611013
	ENSMUSG00000079260.4	Tmppe	0.353665	0.471107	2.16757	0.153939	0.485512
	ENSMUSG00000121042.1	ENSMUSG00000121042.1	0.353461	1.01778	2.02799	0.167294	0.506349
	ENSMUSG00000016493.14	Cd46	0.352896	2.89405	7.66961	0.0106573	0.138406
	ENSMUSG00000072761.12	Gm6712	0.352787	2.48167	7.98722	0.00934116	0.13086
	ENSMUSG00000060044.9	Tmem26	0.352691	1.45765	2.99169	0.0965319	0.39391
	ENSMUSG00000099492.2	Gm5525	0.352492	1.3796	3.67199	0.0673151	0.330028
	ENSMUSG00000093979.9	Gm2237	0.351749	0.295571	1.74223	0.199305	0.542102
	ENSMUSG00000067942.7	Zfp160	0.351573	4.30044	18.3171	0.000259099	0.0210338
	ENSMUSG00000028039.12	Efna3	0.35145	1.18961	1.97511	0.172716	0.51177
	ENSMUSG00000020774.10	Aspa	0.351072	2.73643	9.60266	0.00490032	0.0941708
	ENSMUSG00000007480.7	Mc5r	0.350856	-0.294005	0.777223	0.386734	0.715728
	ENSMUSG00000067780.4	Pi15	0.35079	3.2714	3.5079	0.0733042	0.34268
	ENSMUSG00000109771.2	ENSMUSG00000109771.2	0.350721	-0.138499	2.73179	0.164663	0.502866
	ENSMUSG00000118038.3	Gm9895	0.350669	-0.223733	1.22707	0.278953	0.623708
	ENSMUSG00000117123.2	Gm49890	0.349844	0.953961	4.03251	0.0560105	0.303728
	ENSMUSG00000110403.2	Gm45553	0.349722	-0.224852	1.43087	0.243303	0.589684
	ENSMUSG00000027317.9	Ppp1r14d	0.348837	1.34124	2.51465	0.125878	0.445661
	ENSMUSG00000026986.15	Hnmt	0.348494	3.81621	13.2289	0.00131012	0.045088
	ENSMUSG00000113047.3	Gm47469	0.348348	3.4923	13.0916	0.00137337	0.0466576
	ENSMUSG00000012350.16	Ehf	0.348027	5.38373	15.9431	0.000536224	0.0298872
	ENSMUSG00000029664.11	Tfpi2	0.347959	0.916776	2.50692	0.126433	0.446233
	ENSMUSG00000057244.7	Gm6139	0.347422	-0.353449	0.211843	0.649469	0.865822
	ENSMUSG00000096995.4	2810029C07Rik	0.347323	1.3149	2.71759	0.112275	0.422885
	ENSMUSG00000117465.2	Gm49980	0.347274	2.17511	1.16672	0.290808	0.635029
	ENSMUSG00000061816.16	Myl1	0.347159	1.86226	0.78793	0.383534	0.713015
	ENSMUSG00000079737.6	ENSMUSG00000079737.6	0.346893	1.55326	6.1267	0.0207643	0.186076
	ENSMUSG00000096715.3	Igkv3-4	0.346814	-0.320962	0.366834	0.550419	0.814741
	ENSMUSG00000047875.7	Gpr157	0.34678	3.61432	17.8855	0.000294723	0.022366
	ENSMUSG00000049414.8	Gm5417	0.346387	0.57793	3.44921	0.0755924	0.348578
	ENSMUSG00000049107.14	Ntf3	0.346261	1.67621	3.25618	0.0837159	0.366911
	ENSMUSG00000010760.6	Phlda2	0.346167	-0.08492	1.11669	0.301151	0.644517
	ENSMUSG00000039304.12	Tnfsf10	0.346032	7.36986	8.58702	0.0073165	0.114757
	ENSMUSG00000036902.12	Neto2	0.346001	1.7453	2.15182	0.155379	0.487406
	ENSMUSG00000029919.6	Hpgds	0.345421	1.97322	5.05614	0.0339877	0.233662
	ENSMUSG00000059897.6	Zfp930	0.345367	3.79035	14.8045	0.000773312	0.0361466
	ENSMUSG00000047342.18	Zfp286	0.345305	1.40269	3.12175	0.0899668	0.378604
	ENSMUSG00000072244.12	Trim6	0.345271	2.09706	3.43227	0.0762679	0.349743
	ENSMUSG00000022048.9	Dpysl2	0.345221	7.10333	37.6943	2.41674e-06	0.00130912
	ENSMUSG00000047757.18	Fancb	0.344799	2.62732	9.283	0.00554998	0.101686
	ENSMUSG00000039037.6	St6galnac5	0.344766	1.55447	1.79859	0.192434	0.533579
	ENSMUSG00000084803.9	5830444B04Rik	0.344151	2.65831	0.873501	0.359294	0.693079
	ENSMUSG00000042742.8	Bmt2	0.343334	4.04373	6.1259	0.0207717	0.186076
	ENSMUSG00000032502.9	Stac	0.343232	0.302455	1.4389	0.242023	0.588556
	ENSMUSG00000089901.2	Gm8113	0.343061	2.38852	3.53859	0.0721392	0.340912
	ENSMUSG00000090110.9	Cmc4	0.342631	2.63398	11.7562	0.00219601	0.0611005
	ENSMUSG00000087413.3	Gm11266	0.342569	1.23521	3.13362	0.0893935	0.378229
	ENSMUSG00000021390.7	Ogn	0.342454	8.4248	20.7327	0.000129238	0.0140893
	ENSMUSG00000031712.11	Il15	0.342379	2.76312	7.87904	0.00976816	0.133324
	ENSMUSG00000033427.15	Upb1	0.341793	0.0821271	1.21449	0.28137	0.626453
	ENSMUSG00000074912.12	Gm14207	0.341786	2.20732	4.52029	0.0439759	0.267842
	ENSMUSG00000034522.11	Zfp395	0.3411	5.69653	20.8496	0.000125089	0.0138108
	ENSMUSG00000040321.4	Zfp770	0.340703	3.28133	12.3854	0.0017559	0.0553168
	ENSMUSG00000057933.11	Gsta2	0.339484	1.74344	0.846133	0.3668	0.700328
	ENSMUSG00000116215.2	Gm5470	0.339477	0.563208	1.98247	0.171949	0.511044
	ENSMUSG00000037722.9	Gnpnat1	0.33915	4.23512	10.0144	0.00418325	0.08551
	ENSMUSG00000090963.3	Gm17655	0.338983	0.950049	2.60624	0.119512	0.435292
	ENSMUSG00000007777.10	0610009B22Rik	0.338705	3.23787	14.9121	0.000746622	0.0357512
	ENSMUSG00000076549.3	Igkv4-68	0.338471	-0.228103	0.261406	0.613826	0.85032
	ENSMUSG00000064356.1	mt-Atp8	0.33845	7.17631	0.672706	0.420179	0.737504
	ENSMUSG00000051235.11	Gen1	0.338011	0.673043	1.2676	0.271347	0.616377
	ENSMUSG00000040086.14	Tnni3k	0.337528	1.15798	2.09098	0.161101	0.497333
	ENSMUSG00000046480.7	Scn4b	0.337318	1.45477	0.947761	0.339998	0.677932
	ENSMUSG00000032377.9	Plscr4	0.337072	6.06949	34.1959	4.9547e-06	0.00221484
	ENSMUSG00000095127.3	Ighv1-82	0.336968	0.226179	0.180801	0.674473	0.875333
	ENSMUSG00000079560.14	Hoxa3	0.336813	3.93019	7.8345	0.0099502	0.133853
	ENSMUSG00000086825.2	Gm15675	0.336099	4.2335	10.8146	0.00309633	0.0735398
	ENSMUSG00000052684.5	Jun	0.336022	8.78863	7.15053	0.0132701	0.152435
	ENSMUSG00000101939.2	Gm28438	0.33591	7.19947	4.27753	0.0495558	0.284437
	ENSMUSG00000070531.5	Wfdc6b	0.335876	0.373055	1.4201	0.245035	0.591104
	ENSMUSG00000034059.15	Ypel4	0.335672	1.15641	2.45484	0.130251	0.451016
	ENSMUSG00000091736.4	Yy2	0.335652	1.65668	1.42179	0.244763	0.591072
	ENSMUSG00000022034.11	Esco2	0.335331	0.919413	1.46018	0.238669	0.585245
	ENSMUSG00000109097.3	Gm29683	0.335059	-0.299819	1.32511	0.261014	0.607629
	ENSMUSG00000025038.8	Efhc2	0.335056	0.153209	2.59043	0.133663	0.455725
	ENSMUSG00000050050.18	Ccdc158	0.334548	0.928975	3.3911	0.0779388	0.354064
	ENSMUSG00000103046.2	Gm37309	0.334318	0.859903	3.49717	0.0737165	0.34368
	ENSMUSG00000036282.16	Naa30	0.333938	4.8267	7.32878	0.0123008	0.148173
	ENSMUSG00000116656.2	Gm49708	0.333821	2.7443	5.89264	0.0230732	0.197049
	ENSMUSG00000026034.18	Clk1	0.333056	7.64067	65.9551	2.41023e-08	4.87907e-05
	ENSMUSG00000090164.9	BC035044	0.332554	1.62996	2.98324	0.0969771	0.394786
	ENSMUSG00000034640.10	Tiparp	0.332523	5.48265	30.3487	1.15152e-05	0.0038123
	ENSMUSG00000074165.11	Zfp788	0.332286	4.25768	16.8491	0.000404019	0.0270396
	ENSMUSG00000035235.14	Trim13	0.331769	3.45658	11.9532	0.0020465	0.0590249
	ENSMUSG00000044548.12	Dact1	0.331762	4.50297	15.8762	0.000547712	0.0302205
	ENSMUSG00000060487.8	Samd5	0.33169	4.3491	13.5106	0.00119007	0.0430396
	ENSMUSG00000026098.14	Pms1	0.331622	1.90834	5.17294	0.0321648	0.227755
	ENSMUSG00000106634.2	Gm43042	0.33161	3.39548	3.3892	0.0780169	0.354175
	ENSMUSG00000006403.14	Adamts4	0.331545	1.71722	3.00333	0.0959221	0.392612
	ENSMUSG00000048379.10	Socs4	0.331365	4.68615	9.69839	0.00472235	0.0919754
	ENSMUSG00000041649.14	Klf8	0.331325	1.57687	3.27915	0.0826983	0.364548
	ENSMUSG00000038173.16	Enpp6	0.331258	0.587199	1.39303	0.249457	0.596014
	ENSMUSG00000033964.13	Zbtb41	0.331183	3.9834	8.0197	0.00921699	0.129787
	ENSMUSG00000101111.2	Gm28437	0.331075	11.6216	9.11275	0.0059341	0.104275
	ENSMUSG00000035125.11	Gcfc2	0.330956	2.39064	3.91837	0.0593382	0.311593
	ENSMUSG00000076564.3	Igkv12-46	0.330908	-0.0243759	0.35394	0.557457	0.818202
	ENSMUSG00000058883.17	Zfp708	0.330756	1.55696	1.57656	0.22134	0.565464
	ENSMUSG00000024027.9	Glp1r	0.330277	7.6865	21.8686	9.44914e-05	0.0119445
	ENSMUSG00000035104.15	Eva1a	0.330167	2.80847	5.74368	0.0246904	0.203101
	ENSMUSG00000116504.3	I730030J21Rik	0.32952	-0.0567282	1.2202	0.28027	0.625333
	ENSMUSG00000107705.2	Gm45062	0.329398	4.21741	6.48263	0.0177284	0.174803
	ENSMUSG00000066798.4	Zbtb6	0.329202	3.79873	6.44458	0.0180281	0.175922
	ENSMUSG00000022203.8	Efs	0.329128	3.67796	7.84562	0.00990441	0.133814
	ENSMUSG00000120881.1	ENSMUSG00000120881.1	0.328945	0.408267	0.265201	0.611279	0.849165
	ENSMUSG00000073073.5	Gm8098	0.328941	0.151006	1.31987	0.261933	0.608871
	ENSMUSG00000040254.12	Sema3d	0.328742	3.16146	5.50493	0.0275521	0.2134
	ENSMUSG00000005917.16	Otx1	0.328409	1.20956	1.13445	0.297424	0.640441
	ENSMUSG00000027993.17	Trim2	0.328298	4.84257	17.4293	0.000338261	0.0245331
	ENSMUSG00000017412.16	Cacnb4	0.328238	0.60629	1.64093	0.212434	0.554903
	ENSMUSG00000037826.6	Ppm1k	0.328052	4.38633	14.5879	0.000830215	0.0375164
	ENSMUSG00000095366.3	Gm21860	0.327147	2.55192	1.39711	0.248783	0.595144
	ENSMUSG00000011960.13	Ccnt1	0.32675	5.47468	26.563	2.81329e-05	0.00609569
	ENSMUSG00000026017.14	Carf	0.326148	2.5626	8.48055	0.00763752	0.117574
	ENSMUSG00000055725.12	Paqr3	0.326134	1.39414	3.35669	0.0793676	0.35734
	ENSMUSG00000054263.13	Lifr	0.326123	7.03745	12.7014	0.00157202	0.0510288
	ENSMUSG00000030067.18	Foxp1	0.326026	6.85403	20.3382	0.000144376	0.0152599
	ENSMUSG00000071273.5	Gm5145	0.325898	-0.156655	2.18251	0.214734	0.557383
	ENSMUSG00000003198.11	Zfp959	0.325621	3.48696	8.85281	0.00657797	0.108699
	ENSMUSG00000044708.6	Kcnj10	0.32536	0.375274	1.73026	0.200803	0.543413
	ENSMUSG00000032537.16	Ephb1	0.325204	1.35697	2.31091	0.141531	0.467739
	ENSMUSG00000108181.2	C030015A19Rik	0.325195	1.66978	5.51378	0.0274396	0.213208
	ENSMUSG00000044390.6	Tigd3	0.325115	0.718381	1.52844	0.228307	0.573546
	ENSMUSG00000028327.15	Stra6l	0.324941	0.487322	1.90335	0.18042	0.521652
	ENSMUSG00000018238.7	Gdf9	0.324699	0.0855789	1.58028	0.220813	0.564872
	ENSMUSG00000097375.4	6720427I07Rik	0.32465	3.0302	5.66477	0.025598	0.206602
	ENSMUSG00000019880.11	Rspo3	0.324409	1.36988	2.15227	0.155338	0.487406
	ENSMUSG00000038174.15	Hycc2	0.32425	3.83263	4.47526	0.0449552	0.270951
	ENSMUSG00000048728.16	Zfp454	0.324214	0.846394	2.10109	0.160133	0.495849
	ENSMUSG00000004951.11	Hspb1	0.323739	7.29071	6.44394	0.0180332	0.175922
	ENSMUSG00000106895.2	Gm4754	0.323732	2.11675	3.4636	0.0750237	0.34716
	ENSMUSG00000048502.15	Duxbl1	0.323685	0.802732	2.04388	0.165704	0.503828
	ENSMUSG00000035356.18	Nfkbiz	0.323274	4.74385	21.6851	9.93362e-05	0.0123633
	ENSMUSG00000099478.2	Gm28370	0.32321	3.02714	5.5827	0.0265813	0.209914
	ENSMUSG00000106139.3	Gm30648	0.323128	1.258	2.35795	0.137721	0.462646
	ENSMUSG00000063953.4	Amd2	0.323123	2.21504	2.31951	0.140825	0.467101
	ENSMUSG00000026094.15	Stk17b	0.323037	5.8472	14.4732	0.000862189	0.0376901
	ENSMUSG00000039384.9	Dusp10	0.323037	3.58352	8.66253	0.00709785	0.113023
	ENSMUSG00000064341.1	mt-Nd1	0.322667	10.6401	6.99869	0.0141625	0.157772
	ENSMUSG00000035133.10	Arhgap5	0.322553	5.17234	7.18496	0.0130765	0.151603
	ENSMUSG00000026196.8	Bard1	0.322532	1.68322	4.07474	0.0548333	0.30069
	ENSMUSG00000078496.10	Zfp982	0.322526	0.780001	1.9967	0.170476	0.51015
	ENSMUSG00000050875.12	Minar2	0.321716	0.318381	1.78589	0.193957	0.535359
	ENSMUSG00000028145.10	Them4	0.321541	2.83171	7.89157	0.00971765	0.133127
	ENSMUSG00000100213.2	Gm28151	0.321515	1.12974	2.72643	0.111722	0.42174
	ENSMUSG00000048621.4	Gm6377	0.321462	0.933783	1.74749	0.198652	0.541164
	ENSMUSG00000120248.1	ENSMUSG00000120248.1	0.321447	0.07751	1.29906	0.265629	0.611801
	ENSMUSG00000120814.1	ENSMUSG00000120814.1	0.321306	-0.129626	0.50702	0.483295	0.77777
	ENSMUSG00000099398.2	Ms4a14	0.321301	1.33088	2.8753	0.102881	0.404476
	ENSMUSG00000050295.5	Foxc1	0.320967	2.23282	3.66174	0.0676722	0.330796
	ENSMUSG00000029410.12	Ppef2	0.320954	0.748792	2.78365	0.108223	0.415561
	ENSMUSG00000003070.7	Efna2	0.320584	1.46392	3.33125	0.0804429	0.359707
	ENSMUSG00000105272.2	Gm43071	0.320443	0.880954	2.71905	0.112183	0.422736
	ENSMUSG00000002565.17	Scin	0.320024	0.371928	1.05565	0.314451	0.655762
	ENSMUSG00000090386.12	Mir99ahg	0.320005	1.99125	3.38175	0.078324	0.355132
	ENSMUSG00000039989.8	Cbx4	0.319888	5.52213	25.3364	3.81516e-05	0.00702793
	ENSMUSG00000085730.8	Gm13307	0.319369	0.0313033	1.62897	0.214055	0.556675
	ENSMUSG00000031333.8	Abcb7	0.319248	4.05732	9.62007	0.00486742	0.0938507
	ENSMUSG00000022586.12	Ly6i	0.319201	3.72547	1.30327	0.264876	0.611059
	ENSMUSG00000041324.15	Inhba	0.319201	1.17369	1.9389	0.176552	0.517598
	ENSMUSG00000052572.20	Dlg2	0.319138	0.00127779	1.90846	0.179858	0.520871
	ENSMUSG00000031246.15	Sh3bgrl	0.318947	7.66017	7.48673	0.0115068	0.14254
	ENSMUSG00000048895.14	Cdk5r1	0.318925	0.695991	1.90776	0.179934	0.520871
	ENSMUSG00000063253.12	Scoc	0.318773	5.16557	18.3241	0.000258561	0.0210338
	ENSMUSG00000074166.8	AW146154	0.318642	3.3426	8.44213	0.0077571	0.118099
	ENSMUSG00000028214.14	Gem	0.318088	4.96264	7.53327	0.0112837	0.141018
	ENSMUSG00000032757.7	Bet1	0.317767	4.60885	16.8338	0.000405932	0.0270632
	ENSMUSG00000050270.13	Tmem220	0.317389	3.45755	11.5988	0.00232406	0.0625409
	ENSMUSG00000025326.13	Ube3a	0.317236	5.50459	8.35472	0.00803697	0.120722
	ENSMUSG00000084350.2	Znf41-ps	0.317163	1.80254	0.965532	0.335597	0.673711
	ENSMUSG00000053263.4	Gm12592	0.31666	1.19439	1.63168	0.213686	0.556246
	ENSMUSG00000100444.2	C530043A13Rik	0.316625	1.20122	1.40991	0.246688	0.592517
	ENSMUSG00000007379.16	Dennd2c	0.316472	3.13521	5.65761	0.0256821	0.206865
	ENSMUSG00000058163.15	Gm5431	0.316325	3.87052	2.0534	0.164761	0.502867
	ENSMUSG00000017144.9	Rnd3	0.316234	4.68855	15.3563	0.000646624	0.0325937
	ENSMUSG00000029778.13	Adcyap1r1	0.316029	3.10127	2.56251	0.122503	0.440465
	ENSMUSG00000037418.7	Best1	0.315886	1.86636	2.24698	0.146912	0.475521
	ENSMUSG00000073856.12	Iqck	0.315862	2.23873	4.67152	0.0408584	0.256133
	ENSMUSG00000097222.4	Gata6os	0.315695	1.61136	3.9796	0.0575261	0.30748
	ENSMUSG00000117818.2	Gm50105	0.31566	0.226031	2.23806	0.147681	0.476349
	ENSMUSG00000043017.10	Ptgir	0.315391	3.77724	5.99527	0.0220274	0.192064
	ENSMUSG00000038175.11	Mylip	0.315257	5.52755	19.0944	0.000206181	0.0187117
	ENSMUSG00000105095.2	8430422M14Rik	0.31485	1.88807	8.84956	0.00695861	0.11231
	ENSMUSG00000025323.11	Sp4	0.31478	3.10776	4.06559	0.0550861	0.301305
	ENSMUSG00000048216.14	Gpr85	0.314716	-0.355596	2.22406	0.228347	0.573564
	ENSMUSG00000044550.12	Tceal3	0.314697	0.613416	1.84493	0.187002	0.529396
	ENSMUSG00000030017.3	Reg3g	0.314392	6.40876	0.367284	0.550176	0.814741
	ENSMUSG00000063179.14	Pstk	0.314288	3.22323	9.55397	0.00499366	0.095121
	ENSMUSG00000037681.14	Esyt3	0.314269	4.09017	9.52316	0.00505373	0.0959489
	ENSMUSG00000022219.11	Cideb	0.314174	0.340637	1.53997	0.226612	0.571182
	ENSMUSG00000056870.10	Gulp1	0.313847	3.73064	3.89727	0.0599777	0.313621
	ENSMUSG00000118841.1	Rn7s2	0.313827	1.79963	0.756737	0.392967	0.719769
	ENSMUSG00000118866.1	Rn7s1	0.313827	1.79963	0.756737	0.392967	0.719769
	ENSMUSG00000107481.2	4833403J16Rik	0.313531	2.98447	8.28507	0.0082679	0.121971
	ENSMUSG00000025956.11	Mettl21a	0.313341	3.7464	16.8609	0.000402552	0.0270396
	ENSMUSG00000037211.13	Spry1	0.313194	7.01671	23.6937	5.81137e-05	0.0085002
	ENSMUSG00000037139.16	Myom3	0.313187	2.44863	3.77412	0.0638692	0.322021
	ENSMUSG00000059839.10	Zfp874b	0.3129	3.81276	15.4654	0.000624346	0.0322096
	ENSMUSG00000035936.7	Aldh5a1	0.312883	3.81489	7.96077	0.00944363	0.131272
	ENSMUSG00000031197.12	Vbp1	0.312745	4.95276	8.3062	0.00819708	0.121631
	ENSMUSG00000078861.9	Zfp931	0.312682	2.42144	3.70478	0.0661859	0.328268
	ENSMUSG00000020063.17	Sirt1	0.312504	4.83265	13.0512	0.00139259	0.0466951
	ENSMUSG00000046404.6	Yod1	0.312469	3.97485	14.4473	0.000869586	0.0376901
	ENSMUSG00000022330.6	Osr2	0.312413	-0.105287	1.22526	0.279299	0.624286
	ENSMUSG00000094845.3	Tmem95	0.312364	-0.308315	0.849767	0.36579	0.69943
	ENSMUSG00000078894.10	2210418O10Rik	0.31205	2.07906	0.766778	0.389893	0.717681
	ENSMUSG00000046785.9	Epm2aip1	0.311999	5.45215	7.89945	0.00968599	0.133003
	ENSMUSG00000067704.2	Wfdc13	0.311951	0.525687	1.09625	0.305519	0.648392
	ENSMUSG00000074472.11	Zfp872	0.311894	0.652716	2.48527	0.128004	0.448338
	ENSMUSG00000053040.14	Aph1c	0.311696	3.77346	16.4911	0.000451462	0.0281453
	ENSMUSG00000120920.1	ENSMUSG00000120920.1	0.311667	1.37711	2.92246	0.100251	0.40059
	ENSMUSG00000120880.1	ENSMUSG00000120880.1	0.311528	0.614133	1.80863	0.191241	0.532252
	ENSMUSG00000047407.18	Tgif1	0.311506	4.73697	18.3027	0.000260209	0.0210338
	ENSMUSG00000063558.5	Aox1	0.311462	5.67695	2.62552	0.118221	0.432988
	ENSMUSG00000036390.9	Gadd45a	0.311099	3.61104	5.6241	0.0260801	0.208617
	ENSMUSG00000056671.8	Prelid2	0.311073	0.558811	2.16648	0.154037	0.485718
	ENSMUSG00000113626.3	Gm7240	0.31102	0.0929144	1.42588	0.244103	0.590449
	ENSMUSG00000047604.4	Frat2	0.310876	2.08019	4.56142	0.0431025	0.264567
	ENSMUSG00000054855.14	Rnd1	0.31082	4.60943	5.89838	0.0230132	0.196799
	ENSMUSG00000051748.3	Wfdc21	0.310313	1.19149	1.06263	0.31289	0.654563
	ENSMUSG00000010175.14	Prox1	0.31024	1.89656	6.66339	0.0163774	0.168233
	ENSMUSG00000072640.12	Lyrm9	0.310223	3.497	9.24031	0.00564367	0.102451
	ENSMUSG00000031367.16	Ap1s2	0.310052	4.93531	10.6744	0.003262	0.0753761
	ENSMUSG00000120664.1	ENSMUSG00000120664.1	0.309951	1.2579	4.96738	0.0396205	0.251568
	ENSMUSG00000051022.8	Hs3st1	0.309784	5.07071	11.5135	0.0023969	0.0639198
	ENSMUSG00000056267.15	Cep70	0.309725	4.17578	10.2641	0.00380494	0.0821356
	ENSMUSG00000079588.4	Tmem182	0.309404	2.26548	1.53123	0.227896	0.572845
	ENSMUSG00000028655.12	Mfsd2a	0.309335	3.13311	1.97144	0.173101	0.512239
	ENSMUSG00000021712.16	Trim23	0.309225	3.99911	18.8769	0.00021969	0.0192329
	ENSMUSG00000024145.7	Pigf	0.309007	2.39825	5.12955	0.0328289	0.230507
	ENSMUSG00000033610.17	Pank1	0.308722	4.15797	11.0842	0.0028031	0.0703167
	ENSMUSG00000060548.14	Tnfrsf19	0.308434	6.21776	18.3099	0.000259649	0.0210338
	ENSMUSG00000107655.2	Gm44220	0.308431	4.87783	7.16743	0.0131747	0.152079
	ENSMUSG00000028518.9	Prkaa2	0.308197	4.29364	19.1811	0.000201055	0.0184397
	ENSMUSG00000045259.5	Klhdc9	0.307754	1.06858	1.28892	0.267454	0.613396
	ENSMUSG00000042678.18	Myo15a	0.307537	0.446875	1.72088	0.201986	0.544938
	ENSMUSG00000118449.2	Gm3625	0.307474	0.238849	2.45018	0.141497	0.467721
	ENSMUSG00000049420.10	Tmem200a	0.307249	3.67689	5.77992	0.0242857	0.201807
	ENSMUSG00000030960.17	Eef1akmt2	0.307027	3.1897	9.64337	0.00482375	0.0932161
	ENSMUSG00000102420.2	Gm37464	0.307004	1.48349	2.53528	0.12441	0.443022
	ENSMUSG00000121482.1	ENSMUSG00000121482.1	0.306894	2.87479	4.8916	0.0367548	0.242708
	ENSMUSG00000050240.17	Hic2	0.306748	2.38089	6.35794	0.0187321	0.177843
	ENSMUSG00000053870.8	Fpgt	0.306687	4.15228	16.5241	0.000446845	0.0280823
	ENSMUSG00000050359.8	Sprr1a	0.306661	1.77504	0.168106	0.685437	0.880916
	ENSMUSG00000047759.7	Hs3st3a1	0.306458	1.79914	3.44098	0.0759198	0.348977
	ENSMUSG00000047904.7	Sstr2	0.306349	1.58847	2.49198	0.127515	0.447983
	ENSMUSG00000041134.16	Cyyr1	0.305942	8.07426	10.5473	0.00342052	0.0768021
	ENSMUSG00000030228.20	Pik3c2g	0.305921	0.446367	0.975273	0.333218	0.672097
	ENSMUSG00000042677.8	Zc3h12a	0.305768	4.32843	13.5905	0.00115822	0.0423558
	ENSMUSG00000022253.18	Nadk2	0.305719	4.25982	14.5441	0.000842278	0.037629
	ENSMUSG00000087060.9	Eldr	0.305632	0.0427497	1.80024	0.192238	0.533331
	ENSMUSG00000045327.8	6330549D23Rik	0.30534	0.827314	3.17427	0.0874626	0.374063
	ENSMUSG00000038180.12	Spag4	0.304746	-0.12308	1.1955	0.285073	0.629645
	ENSMUSG00000109827.3	Gm6213	0.304677	0.534967	1.79595	0.192749	0.534066
	ENSMUSG00000045349.16	Sh2d5	0.304652	0.0997977	1.91624	0.209212	0.552901
	ENSMUSG00000029352.15	Crybb3	0.304476	1.04169	2.2186	0.149378	0.478472
	ENSMUSG00000025481.13	Urah	0.304037	2.5326	3.73238	0.0652525	0.325305
	ENSMUSG00000067928.7	Zfp760	0.304023	3.99697	8.03877	0.00914494	0.129087
	ENSMUSG00000068523.13	Gng5	0.303973	6.31735	13.4364	0.00122047	0.0438913
	ENSMUSG00000003824.13	Syce2	0.303657	1.37655	4.01328	0.0565561	0.305213
	ENSMUSG00000062949.14	Atp11c	0.303594	4.41535	3.12153	0.089977	0.378604
	ENSMUSG00000092368.3	A930015D03Rik	0.303579	0.706824	1.15032	0.294146	0.63735
	ENSMUSG00000085189.3	Gm11963	0.30351	0.218406	1.48398	0.23499	0.581072
	ENSMUSG00000089857.10	Zfp882	0.303447	1.76434	4.30465	0.0488945	0.282355
	ENSMUSG00000117499.2	Gm50010	0.303278	2.43219	5.60778	0.0262765	0.209034
	ENSMUSG00000051279.3	Gdf6	0.303221	0.284513	1.16558	0.291039	0.635135
	ENSMUSG00000120166.1	ENSMUSG00000120166.1	0.303179	3.77432	13.2683	0.00129256	0.0450298
	ENSMUSG00000073008.12	Gpr174	0.303124	1.66441	2.59587	0.120214	0.436304
	ENSMUSG00000086481.3	Gm11707	0.30294	-0.339567	1.00081	0.327092	0.666491
	ENSMUSG00000041624.11	Gucy1a2	0.302604	0.0879222	1.19558	0.285057	0.629645
	ENSMUSG00000079168.5	Cd209g	0.30232	1.1101	0.723473	0.403411	0.728443
	ENSMUSG00000100455.2	Gm29170	0.302312	0.676692	2.34807	0.138512	0.463948
	ENSMUSG00000026077.16	Npas2	0.302252	3.62991	2.60304	0.119728	0.435527
	ENSMUSG00000045414.8	Dipk2a	0.302148	6.97251	7.39178	0.011977	0.145794
	ENSMUSG00000096594.3	Igkv8-19	0.301735	-0.242069	0.211526	0.649712	0.865822
	ENSMUSG00000034110.9	Kctd7	0.301702	3.77434	12.0111	0.00200472	0.0582073
	ENSMUSG00000103839.2	Gm37607	0.301336	1.23952	1.81585	0.190388	0.531805
	ENSMUSG00000015880.14	Ncapg	0.300914	1.91639	2.22382	0.148921	0.477878
	ENSMUSG00000063894.16	Zkscan8	0.300846	4.27595	4.41407	0.0463255	0.274532
	ENSMUSG00000044763.9	Trmt10c	0.300796	3.8958	13.9836	0.00101457	0.0396989
	ENSMUSG00000026824.12	Kcnj3	0.300796	2.63035	1.26806	0.271263	0.616377
	ENSMUSG00000037818.17	Abhd18	0.300711	3.06459	12.1746	0.00189156	0.0567729
	ENSMUSG00000040423.12	Rc3h1	0.300519	5.67212	18.2939	0.000260889	0.0210338
	ENSMUSG00000039166.17	Akap7	0.30035	5.24699	19.107	0.000205432	0.0187117
	ENSMUSG00000105906.2	Iglc1	0.30022	2.83358	0.332059	0.569813	0.82502
	ENSMUSG00000110424.3	Zbed5-ps	0.300133	0.673804	1.6943	0.205388	0.548144
	ENSMUSG00000067219.10	Nipal1	0.299719	2.78592	6.75854	0.0157123	0.165686
	ENSMUSG00000020623.12	Map2k6	0.299646	2.14177	3.2848	0.0824504	0.364548
	ENSMUSG00000109555.2	Gm44891	0.299603	1.31634	1.53852	0.226824	0.571306
	ENSMUSG00000072601.5	Ear1	0.299448	4.67218	8.67119	0.00707323	0.113002
	ENSMUSG00000022947.9	Cbr3	0.299422	4.16208	1.0766	0.309798	0.651256
	ENSMUSG00000056073.17	Grik2	0.298911	0.169	1.17435	0.289273	0.633377
	ENSMUSG00000117872.2	A530088E08Rik	0.298833	-0.381467	0.856974	0.3638	0.697887
	ENSMUSG00000121059.1	ENSMUSG00000121059.1	0.29864	2.72857	9.80269	0.00453645	0.0898782
	ENSMUSG00000025898.7	Cwf19l2	0.297893	4.00941	19.9149	0.000162791	0.0164059
	ENSMUSG00000117814.2	Gm50431	0.297707	2.73268	5.37582	0.0292521	0.218559
	ENSMUSG00000074579.15	Lekr1	0.297403	1.94026	6.44268	0.0180433	0.175922
	ENSMUSG00000018387.13	Shroom1	0.297361	2.43115	4.33723	0.0481132	0.280806
	ENSMUSG00000030098.16	Grip2	0.297115	2.34243	1.14775	0.294673	0.637924
	ENSMUSG00000038486.10	Sv2a	0.296763	1.19098	2.07868	0.162289	0.499327
	ENSMUSG00000113204.3	Gm46430	0.296452	4.28052	18.1597	0.00027152	0.0217895
	ENSMUSG00000043015.16	Nemp2	0.296297	3.94524	14.5852	0.000830957	0.0375164
	ENSMUSG00000027398.14	Il1b	0.296043	4.26875	1.43245	0.243051	0.589283
	ENSMUSG00000031433.16	Rbm41	0.295601	2.2721	3.99623	0.0570447	0.306134
	ENSMUSG00000056366.6	Fabp3-ps1	0.295472	1.68646	1.7804	0.194619	0.535891
	ENSMUSG00000086629.10	2810403D21Rik	0.295369	0.554026	1.301	0.265281	0.611488
	ENSMUSG00000041945.13	Mfsd9	0.295273	2.39287	4.95816	0.0356062	0.238806
	ENSMUSG00000030670.17	Cyp2r1	0.295238	0.160049	0.962077	0.336446	0.674527
	ENSMUSG00000120539.1	ENSMUSG00000120539.1	0.295231	1.41258	0.693875	0.41306	0.733906
	ENSMUSG00000031258.5	Xkrx	0.295039	1.53864	1.54155	0.226381	0.571182
	ENSMUSG00000036432.9	Siah2	0.294765	4.1322	10.3367	0.00370205	0.0802142
	ENSMUSG00000030922.13	Lyrm1	0.294746	2.05539	4.54128	0.0435276	0.266328
	ENSMUSG00000121158.1	Gm35162	0.294682	-0.264222	1.19763	0.284655	0.629123
	ENSMUSG00000031736.13	Crnde	0.294609	3.41666	10.1505	0.00397221	0.0834278
	ENSMUSG00000064363.1	mt-Nd4	0.294382	11.3239	8.00212	0.00928399	0.130307
	ENSMUSG00000121502.1	ENSMUSG00000121502.1	0.294376	1.73862	1.64937	0.2113	0.554428
	ENSMUSG00000021702.8	Thbs4	0.29415	-0.191035	0.442327	0.51234	0.795245
	ENSMUSG00000021635.15	Rad17	0.293775	4.29758	16.8534	0.000403483	0.0270396
	ENSMUSG00000083287.5	Idi1-ps1	0.293542	2.63213	2.6242	0.118308	0.433198
	ENSMUSG00000083083.2	Gm15382	0.293518	0.423018	1.55188	0.22488	0.569227
	ENSMUSG00000064351.1	mt-Co1	0.293491	13.2487	12.5613	0.00165081	0.0528929
	ENSMUSG00000030200.14	Bcl2l14	0.293451	2.61182	3.71438	0.0658597	0.327577
	ENSMUSG00000101462.3	Gm3052	0.293416	0.664767	2.04067	0.166024	0.504535
	ENSMUSG00000021622.4	Ckmt2	0.293107	3.87653	1.7346	0.200258	0.542849
	ENSMUSG00000121277.1	ENSMUSG00000121277.1	0.292764	1.19306	1.84926	0.186505	0.528609
	ENSMUSG00000040204.7	Pclaf	0.292739	3.01778	2.34983	0.13837	0.463749
	ENSMUSG00000079508.9	Apoo	0.292585	2.86939	3.82152	0.0623384	0.318973
	ENSMUSG00000092072.4	Gm4540	0.292551	2.20292	2.89555	0.101742	0.402558
	ENSMUSG00000070287.4	Slc35g2	0.292533	4.09177	15.3454	0.000648885	0.0326022
	ENSMUSG00000035045.18	Zc3h12b	0.292417	1.18626	2.52405	0.125207	0.444195
	ENSMUSG00000008384.9	Sertad1	0.2924	5.01874	10.6942	0.00323793	0.074935
	ENSMUSG00000037845.15	Fdxacb1	0.292382	3.12437	12.0261	0.00199404	0.0580919
	ENSMUSG00000071181.3	3830408C21Rik	0.292327	1.56201	3.70865	0.0660543	0.327916
	ENSMUSG00000097828.3	6430562O15Rik	0.292307	0.606292	1.44282	0.2414	0.587803
	ENSMUSG00000002633.5	Shh	0.291603	3.60878	1.57629	0.221379	0.565464
	ENSMUSG00000038980.2	Rbbp8nl	0.291569	0.0453157	1.03911	0.318191	0.659403
	ENSMUSG00000033618.8	Map3k13	0.291242	2.86959	5.65601	0.025701	0.206921
	ENSMUSG00000050578.11	Mmp13	0.291135	0.322494	0.679868	0.41775	0.73665
	ENSMUSG00000111375.6	Btbd8	0.291043	2.91477	5.56297	0.026824	0.211061
	ENSMUSG00000043259.16	Fam13c	0.290838	4.33973	7.23499	0.0128007	0.150636
	ENSMUSG00000012483.5	Rpa3	0.290602	2.56252	9.51722	0.0050654	0.0959602
	ENSMUSG00000025894.12	Aasdhppt	0.290559	3.85074	10.6604	0.00327897	0.0753761
	ENSMUSG00000030623.5	Prss23os	0.290122	0.840193	0.485502	0.492633	0.78371
	ENSMUSG00000031343.14	Gabra3	0.29003	3.84964	3.32093	0.0808841	0.360794
	ENSMUSG00000044338.10	Aplnr	0.290013	6.56515	3.16677	0.087815	0.374769
	ENSMUSG00000037053.7	Azgp1	0.289897	2.0857	2.20997	0.150137	0.479455
	ENSMUSG00000079450.13	Cldn34c1	0.28974	2.66121	4.11959	0.0536136	0.297293
	ENSMUSG00000112300.2	Gm47976	0.289515	1.69253	3.47189	0.0746986	0.346674
	ENSMUSG00000065947.1	mt-Nd4l	0.289341	8.49331	5.09569	0.0333579	0.232219
	ENSMUSG00000120594.1	ENSMUSG00000120594.1	0.289193	-0.333346	0.579382	0.453967	0.758906
	ENSMUSG00000056537.12	Rlim	0.289045	6.00879	22.3116	8.38167e-05	0.0108424
	ENSMUSG00000042895.7	Abra	0.289011	1.8797	2.69373	0.113781	0.424786
	ENSMUSG00000000296.9	Tpd52l1	0.288973	0.276703	1.26459	0.271902	0.617227
	ENSMUSG00000071722.5	Spin4	0.288733	1.33286	3.97479	0.0576663	0.307616
	ENSMUSG00000075591.3	Gm10874	0.288485	-0.264703	0.351085	0.55904	0.818824
	ENSMUSG00000034317.15	Trim59	0.288273	2.90877	4.61602	0.0419727	0.260586
	ENSMUSG00000002265.18	Peg3	0.288179	4.31176	2.89554	0.101743	0.402558
	ENSMUSG00000035762.12	Tmem161b	0.287735	3.72585	15.6322	0.000591911	0.0314438
	ENSMUSG00000057457.12	Phex	0.287536	2.49044	2.32721	0.140197	0.466546
	ENSMUSG00000031377.12	Bmx	0.287418	3.31838	7.12881	0.0133939	0.152864
	ENSMUSG00000039114.17	Nrn1	0.28736	4.75006	4.32689	0.0483596	0.281101
	ENSMUSG00000022863.16	Btg3	0.287044	5.59462	19.5965	0.000178323	0.0170796
	ENSMUSG00000017550.15	Atad5	0.287025	2.11374	4.16436	0.0524263	0.293716
	ENSMUSG00000074243.5	Josd1-ps	0.287012	0.817461	1.17716	0.288711	0.633305
	ENSMUSG00000022809.5	Nr1i2	0.286888	0.261224	1.05199	0.315273	0.656608
	ENSMUSG00000110380.2	Gm45332	0.28675	2.28509	4.6252	0.041786	0.259867
	ENSMUSG00000021466.13	Ptch1	0.286636	6.44631	27.7803	2.0952e-05	0.00485929
	ENSMUSG00000022893.15	Adamts1	0.286086	7.28938	17.6546	0.000315945	0.0234247
	ENSMUSG00000068969.4	Rpl32-ps	0.286043	-0.294334	0.440716	0.513103	0.795592
	ENSMUSG00000096856.8	Gm10778	0.285842	2.58978	7.08281	0.0136602	0.153857
	ENSMUSG00000028358.16	Zfp618	0.285778	2.10943	5.3943	0.0290019	0.217825
	ENSMUSG00000067577.10	A430093F15Rik	0.285634	-0.0641091	0.895928	0.353306	0.688664
	ENSMUSG00000027834.16	Serpini1	0.285301	0.999752	2.2421	0.147332	0.476276
	ENSMUSG00000045534.5	Kcna5	0.285198	0.75605	1.34204	0.258069	0.603937
	ENSMUSG00000031095.16	Cul4b	0.28487	4.33469	8.07245	0.00901918	0.128094
	ENSMUSG00000050855.17	Zfp940	0.284705	1.71789	2.11007	0.159279	0.494698
	ENSMUSG00000037999.14	Arap2	0.284215	5.8527	6.79114	0.0154913	0.164538
	ENSMUSG00000112332.2	4930466K18Rik	0.284035	1.0071	2.21311	0.149861	0.479074
	ENSMUSG00000022591.6	Gm9747	0.283987	4.6233	10.4877	0.00349769	0.0778291
	ENSMUSG00000036091.9	Hyal3	0.283909	0.386665	1.91122	0.179554	0.520468
	ENSMUSG00000063047.10	Zfp780b	0.283802	3.3149	6.77995	0.0155668	0.164935
	ENSMUSG00000049971.18	Glt1d1	0.283696	1.22479	2.35858	0.137671	0.462611
	ENSMUSG00000106631.3	Gm42669	0.283516	0.4913	1.66279	0.209512	0.553188
	ENSMUSG00000034226.8	Rhov	0.283514	0.888399	1.25873	0.272989	0.618475
	ENSMUSG00000069208.10	Zfp825	0.28342	3.06082	10.4714	0.00351914	0.078106
	ENSMUSG00000078247.7	Airn	0.28338	2.54079	6.56727	0.017081	0.171763
	ENSMUSG00000034538.9	Zfp418	0.283337	1.85646	3.51845	0.0729014	0.341904
	ENSMUSG00000046916.10	Myct1	0.28275	6.29716	13.0778	0.00137987	0.0466576
	ENSMUSG00000023885.10	Thbs2	0.282645	1.95698	1.87602	0.183464	0.525604
	ENSMUSG00000072769.8	Gm10419	0.282631	1.17249	1.85465	0.185887	0.528389
	ENSMUSG00000048503.8	Tlcd5	0.282469	3.31903	4.42186	0.0461484	0.274044
	ENSMUSG00000046709.19	Mapk10	0.282437	2.18173	1.54009	0.226595	0.571182
	ENSMUSG00000055240.18	Zfp101	0.282437	4.01133	9.11682	0.00592457	0.104275
	ENSMUSG00000047180.9	Neurl3	0.282318	5.73867	5.06298	0.0338779	0.233291
	ENSMUSG00000043872.15	Zmym1	0.282059	3.61634	5.78949	0.0241801	0.201218
	ENSMUSG00000107659.2	Gm44170	0.282014	-0.16496	0.0699358	0.793687	0.928786
	ENSMUSG00000029314.15	Gpat3	0.281957	2.77532	5.54467	0.0270513	0.212079
	ENSMUSG00000046818.8	Ddit4l	0.281741	2.18702	2.25757	0.146003	0.475108
	ENSMUSG00000046441.6	Cmtr2	0.280943	2.94761	8.10997	0.00888133	0.127231
	ENSMUSG00000035236.18	Scai	0.280942	2.7135	2.21481	0.149711	0.478887
	ENSMUSG00000021022.10	Ppp2r3c	0.28034	4.20051	16.4376	0.000459061	0.0281453
	ENSMUSG00000030170.15	Wnt5b	0.280261	2.32093	3.37214	0.0787222	0.355913
	ENSMUSG00000042808.11	Gpx2	0.280208	4.80921	1.20768	0.282691	0.627181
	ENSMUSG00000017499.16	Cdc6	0.280108	1.79418	2.06074	0.164039	0.502181
	ENSMUSG00000073805.6	Insyn2a	0.279769	0.14283	0.620515	0.438565	0.749017
	ENSMUSG00000003031.15	Cdkn1b	0.279613	6.2638	24.8348	4.33141e-05	0.00728939
	ENSMUSG00000027399.2	Il1a	0.279474	2.84883	3.64174	0.0683756	0.332554
	ENSMUSG00000058975.8	Kcnc1	0.279462	0.0354938	0.605914	0.443935	0.753173
	ENSMUSG00000044807.14	Zfp354c	0.279154	3.00165	6.08559	0.0211505	0.187274
	ENSMUSG00000031628.10	Casp3	0.27911	4.43435	13.509	0.00119069	0.0430396
	ENSMUSG00000002588.14	Pon1	0.279009	5.60947	2.69046	0.113989	0.42506
	ENSMUSG00000109244.2	Gm44751	0.278793	2.19304	4.85797	0.0373508	0.24442
	ENSMUSG00000027900.16	Dram2	0.278685	6.13913	13.5062	0.00119182	0.0430396
	ENSMUSG00000035165.15	Kcne3	0.278495	1.40533	1.64171	0.212329	0.554838
	ENSMUSG00000062931.16	Zfp938	0.278399	2.81961	9.0632	0.00605128	0.10542
	ENSMUSG00000066829.8	Zfp810	0.278134	4.17341	11.2169	0.00267008	0.0679636
	ENSMUSG00000026822.15	Lcn2	0.277975	7.31477	2.94738	0.0988938	0.398472
	ENSMUSG00000003934.6	Efnb3	0.277834	1.09018	2.1626	0.154391	0.485719
	ENSMUSG00000028773.9	Fabp3	0.277802	4.30803	2.01806	0.168296	0.507611
	ENSMUSG00000023892.9	Zfp51	0.277694	3.76194	7.83673	0.00994098	0.133853
	ENSMUSG00000011008.14	Mcoln2	0.277688	1.14719	2.10595	0.15967	0.495195
	ENSMUSG00000038331.16	Satb2	0.277563	0.301501	1.23252	0.277913	0.62254
	ENSMUSG00000021589.14	Rhobtb3	0.27755	3.17356	5.92793	0.0227075	0.195148
	ENSMUSG00000055027.18	Smyd1	0.27636	3.3159	2.00961	0.169155	0.508696
	ENSMUSG00000079293.13	Clec7a	0.276129	5.99948	4.51131	0.0441693	0.26836
	ENSMUSG00000029359.14	Tesc	0.275612	0.657983	1.88884	0.182027	0.523948
	ENSMUSG00000026321.9	Tnfrsf11a	0.275507	3.45094	7.80305	0.010081	0.134185
	ENSMUSG00000029276.14	Glmn	0.275453	1.78909	3.31683	0.08106	0.361312
	ENSMUSG00000032586.10	Traip	0.275356	1.05033	2.38547	0.135549	0.459176
	ENSMUSG00000031494.8	Cd209a	0.275344	3.48923	2.34043	0.139126	0.464574
	ENSMUSG00000037892.14	Pcdh18	0.275313	5.69697	7.00584	0.014119	0.157389
	ENSMUSG00000045519.16	Zfp560	0.275102	2.97195	8.14054	0.00877074	0.126337
	ENSMUSG00000008129.15	Brme1	0.274909	-0.00620085	0.665898	0.422509	0.73887
	ENSMUSG00000021359.17	Tfap2a	0.274906	-0.2611	0.525557	0.475488	0.773699
	ENSMUSG00000039652.17	Cpeb3	0.274813	3.28128	4.97797	0.0352721	0.23826
	ENSMUSG00000043903.5	Zfp469	0.274694	2.02823	2.30573	0.141958	0.468678
	ENSMUSG00000041135.16	Ripk2	0.274688	3.98626	13.2812	0.00128685	0.0449722
	ENSMUSG00000046719.8	Nxph3	0.274498	3.31638	4.52234	0.0439319	0.267668
	ENSMUSG00000085172.2	Gm6542	0.274477	1.72124	3.43918	0.0759915	0.349122
	ENSMUSG00000040969.15	Arhgef38	0.274059	4.83863	5.90063	0.0229899	0.196696
	ENSMUSG00000020335.14	Zfp354b	0.274017	1.10836	2.0511	0.164989	0.503099
	ENSMUSG00000061544.14	Zfp229	0.273828	3.22519	6.27904	0.0193996	0.180694
	ENSMUSG00000056445.9	Hoxaas2	0.273805	2.01544	2.99824	0.096188	0.393213
	ENSMUSG00000028389.13	Zfp37	0.273774	3.29607	9.24602	0.00563104	0.102451
	ENSMUSG00000038132.7	Rbm24	0.273739	3.04897	5.38584	0.0291162	0.217825
	ENSMUSG00000016758.5	Bik	0.273377	3.34306	4.71234	0.04006	0.253061
	ENSMUSG00000046532.9	Ar	0.273311	3.75474	7.50363	0.0114252	0.141764
	ENSMUSG00000047643.6	Gm5454	0.273293	0.751251	1.01557	0.323622	0.663473
	ENSMUSG00000033031.14	Cip2a	0.272915	2.05439	2.44281	0.131152	0.451875
	ENSMUSG00000052188.7	Gm14964	0.272837	2.7668	5.85367	0.0234846	0.198771
	ENSMUSG00000023064.5	Sncg	0.272569	2.73416	0.877909	0.358106	0.692427
	ENSMUSG00000031290.15	Lrch2	0.272469	0.390789	1.58905	0.219577	0.563308
	ENSMUSG00000051726.7	Kcnf1	0.272277	0.953144	1.39252	0.249541	0.596028
	ENSMUSG00000036523.17	Greb1	0.272211	0.106926	0.811749	0.376554	0.706669
	ENSMUSG00000060301.7	2610008E11Rik	0.272182	4.89008	14.8406	0.000764243	0.0359983
	ENSMUSG00000067795.14	4930444P10Rik	0.272094	0.500171	1.48573	0.234723	0.580742
	ENSMUSG00000107121.3	1110006O24Rik	0.272033	-0.118261	1.02443	0.321563	0.661871
	ENSMUSG00000108621.3	Gm33989	0.271996	5.49058	14.3463	0.000899132	0.0377484
	ENSMUSG00000043542.13	Zc2hc1a	0.271781	5.16519	12.9173	0.0014585	0.0482496
	ENSMUSG00000044712.16	Slc38a6	0.271752	4.23886	18.936	0.00021593	0.0190966
	ENSMUSG00000051323.17	Pcdh19	0.271368	2.31477	3.88262	0.0604262	0.314687
	ENSMUSG00000116604.2	Gm49745	0.271313	0.426008	1.10391	0.30387	0.647167
	ENSMUSG00000059852.8	Kcng2	0.271052	0.804068	0.854638	0.364443	0.698286
	ENSMUSG00000090000.3	Ier3ip1	0.270886	5.00748	22.7896	7.37484e-05	0.00998714
	ENSMUSG00000020397.16	Med7	0.270874	4.10075	12.2699	0.00182885	0.05594
	ENSMUSG00000029088.17	Kcnip4	0.270849	0.669109	1.5411	0.226447	0.571182
	ENSMUSG00000024517.18	Grp	0.270599	1.26518	0.768293	0.389432	0.717214
	ENSMUSG00000021377.16	Dek	0.270436	6.32222	24.6335	4.55952e-05	0.00745611
	ENSMUSG00000024511.16	Rab27b	0.270405	4.81304	9.76309	0.00460606	0.090626
	ENSMUSG00000038068.16	Rnf144b	0.270241	5.45292	22.1788	8.68719e-05	0.0111544
	ENSMUSG00000037847.15	Nmrk1	0.270154	2.4387	4.94384	0.0358498	0.239468
	ENSMUSG00000041935.11	Rimoc1	0.269716	6.20878	8.8723	0.00652712	0.108685
	ENSMUSG00000120144.1	ENSMUSG00000120144.1	0.269531	5.07126	6.95851	0.0144096	0.158671
	ENSMUSG00000052135.9	Foxo6	0.269505	1.95383	2.27127	0.144839	0.473527
	ENSMUSG00000037347.8	Chst7	0.269122	3.18013	5.62084	0.0261192	0.208737
	ENSMUSG00000084899.2	Gm15344	0.269055	-0.142631	0.9241	0.345984	0.682063
	ENSMUSG00000097183.4	Gm17501	0.268779	2.5441	5.20248	0.0317213	0.226176
	ENSMUSG00000058927.7	Gm10053	0.268776	4.34924	6.60403	0.016808	0.170465
	ENSMUSG00000032028.16	Nxpe2	0.268691	2.8423	4.10987	0.0538754	0.298049
	ENSMUSG00000087354.3	4930404I05Rik	0.268496	2.17859	1.38	0.251622	0.59822
	ENSMUSG00000045205.17	Dpy19l4	0.268333	4.73078	20.1472	0.000152387	0.0157231
	ENSMUSG00000040464.16	Gtpbp10	0.268262	3.73054	10.2104	0.00388304	0.0828981
	ENSMUSG00000055150.16	Zfp78	0.268226	1.84985	3.3098	0.0813632	0.361863
	ENSMUSG00000111080.2	Gm20300	0.26817	4.76734	24.6559	4.53348e-05	0.00745611
	ENSMUSG00000086013.2	Gm15706	0.267843	1.45679	2.40575	0.133974	0.456248
	ENSMUSG00000038119.16	Cdon	0.267543	4.62637	16.6269	0.000432781	0.0275954
	ENSMUSG00000085171.9	D830026I12Rik	0.267514	3.42367	4.41921	0.0462086	0.274172
	ENSMUSG00000044694.3	2010007H06Rik	0.267222	3.80844	6.76691	0.0156552	0.165569
	ENSMUSG00000078137.2	Ankrd63	0.266622	4.86124	5.57325	0.0266973	0.210351
	ENSMUSG00000082321.4	Gm14253	0.266402	2.56397	6.40807	0.0183212	0.176826
	ENSMUSG00000073197.10	5730507C01Rik	0.26633	-0.103114	0.780365	0.385791	0.714913
	ENSMUSG00000029385.15	Ccng2	0.266198	5.53126	19.5961	0.000178344	0.0170796
	ENSMUSG00000041476.13	Smpx	0.266088	2.17173	0.759227	0.392201	0.719515
	ENSMUSG00000118667.1	Ahnak2	0.266041	5.67804	4.96862	0.0354293	0.238398
	ENSMUSG00000028295.15	Smim8	0.265848	2.74241	6.50569	0.0175493	0.17367
	ENSMUSG00000084939.4	Gm830	0.265834	2.15226	1.17641	0.28886	0.633305
	ENSMUSG00000073555.2	Gm4951	0.265764	4.58614	1.65626	0.21038	0.554118
	ENSMUSG00000045996.13	Polr2k	0.265586	3.16836	6.96096	0.0143944	0.158671
	ENSMUSG00000062470.11	Fbxl12os	0.26551	1.33875	1.75124	0.198186	0.540276
	ENSMUSG00000074415.16	Mir100hg	0.265489	5.04702	4.11592	0.0537123	0.297745
	ENSMUSG00000067279.4	Ppp1r3c	0.26511	4.61849	2.93381	0.0996303	0.399582
	ENSMUSG00000043673.12	Kcns3	0.265109	4.56977	19.3827	0.000189652	0.0177699
	ENSMUSG00000045392.9	Or5m3b	0.265027	1.30835	1.80238	0.191983	0.532879
	ENSMUSG00000041303.8	Gtf3c3	0.264964	4.1855	18.3529	0.000256358	0.0210338
	ENSMUSG00000090319.3	Gm4462	0.264963	0.349237	1.24809	0.274974	0.620383
	ENSMUSG00000047141.6	Zfp654	0.264557	3.86484	6.61207	0.016749	0.17018
	ENSMUSG00000019992.9	Mtfr2	0.264522	0.441255	1.43843	0.242098	0.588656
	ENSMUSG00000108358.2	Gm44509	0.264508	3.50086	6.28279	0.0193672	0.180541
	ENSMUSG00000105283.3	Gm33370	0.264005	0.903772	1.94069	0.17636	0.51735
	ENSMUSG00000032243.9	Itga11	0.263678	1.79016	1.65965	0.20993	0.553646
	ENSMUSG00000031297.15	Slc7a3	0.262971	0.603312	1.44712	0.240721	0.587119
	ENSMUSG00000037762.7	Slc16a9	0.262707	7.1243	18.5735	0.000240172	0.0201927
	ENSMUSG00000047749.3	Zc3hav1l	0.262553	2.95364	6.4278	0.0181622	0.176371
	ENSMUSG00000108037.3	Gm44597	0.262407	3.51473	7.2548	0.0126933	0.150085
	ENSMUSG00000051278.13	Zgrf1	0.262397	1.60918	2.30449	0.14206	0.468775
	ENSMUSG00000024245.5	Tmem178	0.262041	4.56229	8.05065	0.00910037	0.128853
	ENSMUSG00000105895.2	Gm42829	0.261938	0.776971	1.24519	0.275518	0.620883
	ENSMUSG00000058704.10	Memo1	0.261788	4.15401	12.2947	0.00181293	0.05594
	ENSMUSG00000065987.13	Cd209b	0.26174	0.536584	1.01466	0.323834	0.663785
	ENSMUSG00000040694.5	Apobec2	0.261701	2.0055	0.737595	0.398927	0.724811
	ENSMUSG00000033107.7	Rnf125	0.261645	2.49629	2.52074	0.125442	0.444847
	ENSMUSG00000105692.2	Gm43737	0.26164	3.58136	13.3477	0.00125792	0.0444996
	ENSMUSG00000064220.7	H2ac18	0.261276	2.49099	0.389678	0.538356	0.809075
	ENSMUSG00000091625.9	Lsm5	0.261265	2.32734	4.27796	0.0495451	0.284437
	ENSMUSG00000070709.13	Zfp974	0.260845	3.12559	6.07333	0.0212672	0.187845
	ENSMUSG00000097494.9	4933406C10Rik	0.260829	1.30816	2.35437	0.138007	0.463197
	ENSMUSG00000029248.15	Thegl	0.260603	-0.0617994	1.05828	0.313861	0.655415
	ENSMUSG00000021730.9	Hcn1	0.260335	0.0181472	0.524658	0.475862	0.773716
	ENSMUSG00000049511.6	Htr1b	0.260305	1.57095	2.83315	0.105298	0.409983
	ENSMUSG00000085743.2	8430419K02Rik	0.260276	-0.246972	0.609247	0.4427	0.75236
	ENSMUSG00000087440.3	4930577N17Rik	0.260128	0.414733	1.01048	0.324813	0.664735
	ENSMUSG00000014956.16	Ppp1cb	0.260056	7.52066	9.67206	0.00477058	0.0923947
	ENSMUSG00000024617.17	Camk2a	0.260018	2.32415	4.00986	0.0566538	0.305645
	ENSMUSG00000067336.7	Bmpr2	0.259992	8.44637	8.81038	0.00669016	0.110026
	ENSMUSG00000072966.12	Gprasp2	0.259859	2.49624	3.37885	0.0784441	0.355336
	ENSMUSG00000097876.2	Gm16892	0.259811	0.130069	0.758594	0.392396	0.719515
	ENSMUSG00000040774.16	Cept1	0.259301	6.0272	13.2385	0.00130582	0.045088
	ENSMUSG00000029811.15	Aoc1	0.259204	2.8855	0.966672	0.335317	0.673431
	ENSMUSG00000068165.4	Gm10233	0.258996	1.31195	0.0724825	0.790056	0.926951
	ENSMUSG00000089803.4	Gm10171	0.258996	1.31195	0.0724825	0.790056	0.926951
	ENSMUSG00000090610.4	Gm3571	0.258727	3.00959	7.20444	0.0129683	0.151375
	ENSMUSG00000078915.3	Hsp25-ps1	0.258578	4.43567	3.25372	0.0838255	0.367205
	ENSMUSG00000051246.4	Msantd1	0.25854	1.10034	1.92349	0.178217	0.519186
	ENSMUSG00000106025.2	Gm42940	0.258492	0.934095	1.58237	0.220518	0.564819
	ENSMUSG00000075376.11	Rc3h2	0.258394	5.22194	4.73545	0.0396157	0.251568
	ENSMUSG00000019853.7	Hebp2	0.25828	0.9962	0.60075	0.44586	0.754445
	ENSMUSG00000044934.14	Zfp367	0.258204	4.47305	14.0423	0.000994857	0.0392341
	ENSMUSG00000051747.16	Ttn	0.258141	5.53648	1.38403	0.25095	0.597686
	ENSMUSG00000057729.13	Prtn3	0.258119	-0.282576	0.485331	0.492708	0.783757
	ENSMUSG00000097445.2	Gm26631	0.257995	1.39208	1.77287	0.195532	0.536662
	ENSMUSG00000059142.17	Zfp945	0.257875	4.25642	9.72543	0.00467337	0.0912254
	ENSMUSG00000040187.16	Arntl2	0.257825	1.40833	1.85116	0.186286	0.528609
	ENSMUSG00000058192.17	Zfp846	0.25768	3.48031	11.7427	0.00220668	0.0612991
	ENSMUSG00000020948.10	Klhl28	0.257679	3.60858	10.9127	0.00298595	0.0722805
	ENSMUSG00000080845.2	Gm9115	0.257651	0.431097	0.733132	0.400336	0.726033
	ENSMUSG00000032278.12	Paqr5	0.257508	0.661754	1.03708	0.318654	0.659839
	ENSMUSG00000097174.4	Gm4890	0.257417	0.212012	0.927251	0.345178	0.681193
	ENSMUSG00000056718.3	Gm13199	0.257314	0.102727	1.0346	0.319223	0.659839
	ENSMUSG00000000317.12	Bcl6b	0.257261	5.70051	4.5675	0.042975	0.264098
	ENSMUSG00000078879.11	Zfp973	0.257249	0.469306	1.60733	0.217026	0.56006
	ENSMUSG00000021596.18	Mctp1	0.25723	3.31302	4.35883	0.0476028	0.279082
	ENSMUSG00000086596.3	Susd5	0.257072	1.3849	1.57665	0.221328	0.565464
	ENSMUSG00000038793.9	Lefty1	0.25702	1.80536	1.59069	0.219346	0.563141
	ENSMUSG00000109061.2	Gm49320	0.256933	1.44899	0.213533	0.648172	0.864928
	ENSMUSG00000092074.3	Dynlt1a	0.256912	2.6093	3.73862	0.0650437	0.324753
	ENSMUSG00000121487.1	ENSMUSG00000121487.1	0.256869	-0.0207008	0.899799	0.352287	0.688217
	ENSMUSG00000051379.13	Flrt3	0.256813	6.00945	5.0165	0.0346324	0.23616
	ENSMUSG00000002617.15	Zfp40	0.256793	3.55934	6.0794	0.0212094	0.187477
	ENSMUSG00000039704.9	Lmbrd2	0.256645	4.67384	6.43697	0.0180888	0.176153
	ENSMUSG00000097558.2	Gm26902	0.256556	0.211505	1.07227	0.310753	0.652139
	ENSMUSG00000047642.16	D930020B18Rik	0.256484	0.465966	1.33123	0.259944	0.60628
	ENSMUSG00000033543.18	Gtf2a2	0.256451	4.5916	6.78673	0.015521	0.164652
	ENSMUSG00000053475.6	Tnfaip6	0.256325	1.60282	1.93454	0.177021	0.517888
	ENSMUSG00000038702.7	Dsel	0.256258	3.81265	3.72448	0.0655184	0.326443
	ENSMUSG00000110235.3	Gm5086	0.256119	-0.329835	0.525045	0.475701	0.773716
	ENSMUSG00000087179.10	5730471H19Rik	0.256061	2.481	4.04649	0.0556176	0.302692
	ENSMUSG00000028680.15	Plk3	0.255975	3.98204	6.52234	0.0174213	0.173254
	ENSMUSG00000018199.10	Ro60	0.255941	4.98858	3.11116	0.0904815	0.379397
	ENSMUSG00000030303.16	Far2	0.255923	1.90019	1.70203	0.204391	0.547145
	ENSMUSG00000037129.8	Tmprss13	0.255841	1.96445	1.57179	0.222019	0.565778
	ENSMUSG00000003418.12	St8sia6	0.255412	2.55347	1.56937	0.222364	0.566022
	ENSMUSG00000060336.7	Zfp937	0.255206	1.34067	1.73858	0.19976	0.542569
	ENSMUSG00000115970.3	8430426J06Rik	0.255116	0.301911	1.04031	0.317918	0.659351
	ENSMUSG00000070605.5	Zfp992	0.255015	1.31175	1.93583	0.176883	0.517888
	ENSMUSG00000009628.15	Tex15	0.254857	3.2681	5.38766	0.0290915	0.217825
	ENSMUSG00000026708.17	Cenpl	0.254597	2.33802	2.55213	0.123226	0.441321
	ENSMUSG00000114369.3	Gm41077	0.254579	0.277814	1.08303	0.308387	0.649855
	ENSMUSG00000025932.15	Eya1	0.254512	2.55768	2.55596	0.122959	0.441047
	ENSMUSG00000036718.18	Micall2	0.254441	3.31783	4.3307	0.0482686	0.281007
	ENSMUSG00000022309.10	Angpt1	0.25435	5.96161	7.82513	0.00998897	0.133853
	ENSMUSG00000032038.8	St3gal4	0.254312	5.80931	17.6027	0.000320935	0.0236727
	ENSMUSG00000056529.8	Ptafr	0.25418	3.60987	4.19791	0.0515564	0.29148
	ENSMUSG00000092335.2	ENSMUSG00000092335.2	0.254052	0.209717	0.98007	0.332055	0.671297
	ENSMUSG00000022507.7	1810013L24Rik	0.253901	6.11335	21.1213	0.000115996	0.0131398
	ENSMUSG00000020189.16	Osbpl8	0.253744	4.97348	3.82301	0.062291	0.318973
	ENSMUSG00000041483.15	Zfp281	0.2536	4.9242	6.60181	0.0168244	0.170465
	ENSMUSG00000049800.14	Sertad2	0.253533	6.112	23.9439	5.44516e-05	0.00835279
	ENSMUSG00000024905.16	Tesmin	0.253345	-0.339593	0.930783	0.344278	0.680236
	ENSMUSG00000021643.16	Serf1	0.252867	1.81995	3.83772	0.0618248	0.318038
	ENSMUSG00000024968.15	Rcor2	0.252842	0.900415	1.80251	0.191968	0.532879
	ENSMUSG00000020648.4	Dus4l	0.252839	2.69825	4.64752	0.0413361	0.258053
	ENSMUSG00000121382.1	ENSMUSG00000121382.1	0.252822	2.51382	3.19632	0.0864351	0.372441
	ENSMUSG00000047658.7	Gal3st3	0.252748	0.0979978	0.673478	0.419916	0.737504
	ENSMUSG00000120188.1	ENSMUSG00000120188.1	0.252664	0.321806	0.94332	0.34111	0.678205
	ENSMUSG00000106825.2	2510016D11Rik	0.252637	-0.225022	0.459904	0.504154	0.790696
	ENSMUSG00000061048.9	Cdh3	0.252469	1.46775	2.49874	0.127024	0.446938
	ENSMUSG00000028116.14	Myoz2	0.252416	3.63061	1.27689	0.269643	0.615075
	ENSMUSG00000060924.16	Csmd1	0.252302	-0.288004	1.14302	0.330853	0.670447
	ENSMUSG00000044772.3	Sntn	0.252037	3.59039	4.43535	0.0458437	0.273265
	ENSMUSG00000046791.9	Riox1	0.251929	4.77715	8.13847	0.00877816	0.126337
	ENSMUSG00000091542.2	Gm17167	0.25188	1.18572	2.27728	0.144331	0.47258
	ENSMUSG00000035329.8	Fbxo33	0.251866	4.54925	13.4132	0.00123016	0.044057
	ENSMUSG00000021719.10	Rgs7bp	0.251564	1.97048	5.09069	0.0334368	0.232354
	ENSMUSG00000033111.17	3830406C13Rik	0.251496	4.93032	9.68698	0.00474318	0.0920697
	ENSMUSG00000015396.5	Cd83	0.251459	4.59433	6.9179	0.0146642	0.160152
	ENSMUSG00000082361.7	Btc	0.251295	2.26727	2.29209	0.14309	0.470906
	ENSMUSG00000044703.6	Phf11a	0.251235	2.41254	0.909365	0.349787	0.68598
	ENSMUSG00000038403.11	Hjv	0.251225	2.13358	0.922436	0.34641	0.68235
	ENSMUSG00000005131.5	4930550C14Rik	0.251167	1.2969	2.06348	0.163769	0.501906
	ENSMUSG00000034795.15	Ccdc122	0.251106	1.67185	1.79712	0.19261	0.533851
	ENSMUSG00000021824.14	Ap3m1	0.250982	6.7948	23.6815	5.82991e-05	0.0085002
	ENSMUSG00000062014.14	Gmfb	0.250913	6.8645	9.24691	0.00562907	0.102451
	ENSMUSG00000058420.9	Syt17	0.250877	2.84417	4.49271	0.0445728	0.269677
	ENSMUSG00000051285.18	Pcmtd1	0.250812	6.20634	12.0196	0.00199866	0.0581287
	ENSMUSG00000025979.14	Mob4	0.250753	5.37777	17.024	0.000382835	0.0264105
	ENSMUSG00000105881.3	4932422M17Rik	0.250607	3.76082	5.82043	0.023842	0.199958
	ENSMUSG00000095789.7	Nupr1l	0.250582	0.819955	1.75241	0.198041	0.540181
	ENSMUSG00000045876.5	Pcdhb8	0.25051	0.93815	0.82212	0.373572	0.704461
	ENSMUSG00000070858.13	Gm1673	0.250491	0.302149	1.20451	0.283308	0.627666
	ENSMUSG00000070960.5	Gm19680	0.250323	1.9732	2.02762	0.167331	0.506349
	ENSMUSG00000032118.17	Fez1	0.250274	1.27115	1.59507	0.218733	0.562456
	ENSMUSG00000103983.2	Gm20045	0.250174	1.65576	0.828437	0.371773	0.703682
	ENSMUSG00000027208.15	Fgf7	0.249999	4.60177	13.8174	0.0010728	0.0406997
	ENSMUSG00000041685.17	Fcho2	0.249962	6.13553	4.21472	0.0511266	0.289712
	ENSMUSG00000036676.15	Tmtc3	0.249929	4.45945	4.3085	0.0488014	0.282218
	ENSMUSG00000119994.1	ENSMUSG00000119994.1	0.249838	2.676	5.22764	0.0313489	0.224732
	ENSMUSG00000000056.8	Narf	0.249827	4.31402	11.2877	0.00260185	0.0674148
	ENSMUSG00000021055.15	Esr2	0.249794	1.81632	3.12047	0.0900287	0.378604
	ENSMUSG00000064057.13	Scgb3a1	0.249748	7.12319	0.43314	0.516714	0.797145
	ENSMUSG00000113861.2	Gm6190	0.249717	-0.161479	1.05927	0.318439	0.659556
	ENSMUSG00000000142.16	Axin2	0.24968	5.46578	14.3552	0.000896495	0.0377484
	ENSMUSG00000021952.17	Xpo4	0.249668	4.41185	10.9334	0.00296319	0.0719508
	ENSMUSG00000033114.12	Slc35d2	0.249542	3.06698	6.90264	0.0147611	0.160621
	ENSMUSG00000019917.11	Septin10	0.249449	4.61611	21.5521	0.00010302	0.0126595
	ENSMUSG00000039620.18	Trmt9b	0.248945	0.899662	1.30566	0.26445	0.611013
	ENSMUSG00000031583.14	Wrn	0.248725	4.27321	11.2763	0.00261269	0.0674625
	ENSMUSG00000020305.14	Asb3	0.24868	3.5732	13.3192	0.00127025	0.0446623
	ENSMUSG00000075224.11	Lrrc55	0.248667	0.48932	0.969122	0.334717	0.673176
	ENSMUSG00000096647.3	Tmem41b-ps	0.24855	1.78491	1.68119	0.207091	0.550833
	ENSMUSG00000030752.9	Kdm8	0.248367	2.81661	5.632	0.0259858	0.208342
	ENSMUSG00000055489.9	Ano5	0.248036	1.14587	0.88525	0.356139	0.690684
	ENSMUSG00000035878.14	Hykk	0.248013	3.46301	4.60295	0.04224	0.261496
	ENSMUSG00000101655.3	2310040G24Rik	0.247965	0.301325	0.893934	0.353833	0.689409
	ENSMUSG00000120961.1	ENSMUSG00000120961.1	0.247898	-0.0531247	0.71348	0.40663	0.730169
	ENSMUSG00000106062.2	Gm43820	0.247527	0.237338	0.734761	0.399821	0.725665
	ENSMUSG00000097754.3	Ptgs2os2	0.247487	2.1193	2.27913	0.144176	0.472414
	ENSMUSG00000060427.16	Zfp868	0.247414	3.83555	13.1374	0.00135188	0.0460383
	ENSMUSG00000026154.5	Sdhaf4	0.247408	3.01545	8.79398	0.00673409	0.110319
	ENSMUSG00000031465.7	Angpt2	0.247308	5.30007	14.0391	0.000995904	0.0392341
	ENSMUSG00000113003.2	Gm47138	0.247305	0.335896	0.654447	0.426472	0.741267
	ENSMUSG00000078349.5	AW011738	0.24729	4.66134	6.39663	0.018414	0.177327
	ENSMUSG00000021754.18	Map3k1	0.247023	5.13429	14.1486	0.000960186	0.0384395
	ENSMUSG00000064345.1	mt-Nd2	0.247001	10.6311	4.77832	0.0388062	0.249464
	ENSMUSG00000028300.15	C9orf72	0.246988	4.11345	13.9478	0.00102683	0.0399977
	ENSMUSG00000025105.11	Bnc1	0.24697	2.38476	3.28075	0.0826283	0.364548
	ENSMUSG00000021994.16	Wnt5a	0.246954	4.12896	5.32488	0.0299548	0.220458
	ENSMUSG00000025049.7	Taf5	0.246627	2.88921	6.46171	0.0178925	0.175322
	ENSMUSG00000005124.11	Ccn4	0.246603	3.06405	0.897969	0.352769	0.688504
	ENSMUSG00000091172.2	Gm17120	0.246576	-0.216715	0.14898	0.702912	0.886886
	ENSMUSG00000054418.7	2900041M22Rik	0.246526	-0.34291	0.398539	0.53381	0.80717
	ENSMUSG00000074212.8	Dnajb14	0.246408	5.00969	13.7037	0.00111471	0.0414642
	ENSMUSG00000062694.8	Cav3	0.246395	1.39084	2.24118	0.147411	0.476276
	ENSMUSG00000039879.10	Heca	0.246172	6.23202	8.31057	0.0081825	0.121631
	ENSMUSG00000030703.9	Gdpd3	0.246001	2.29095	2.50204	0.126785	0.446596
	ENSMUSG00000079355.6	Ackr4	0.24589	3.42452	3.61894	0.0691878	0.33394
	ENSMUSG00000054293.11	P2ry10b	0.245858	1.70467	2.51562	0.125809	0.44551
	ENSMUSG00000032500.11	Dclk3	0.245625	1.01725	1.45043	0.240199	0.586342
	ENSMUSG00000106957.2	Gm43085	0.245607	7.44317	8.01123	0.00924919	0.130055
	ENSMUSG00000073062.4	Zxdb	0.2456	4.15453	4.59714	0.0423595	0.262048
	ENSMUSG00000037940.18	Inpp4b	0.245521	3.75189	2.72816	0.111614	0.4216
	ENSMUSG00000044408.8	Sptssa	0.245466	5.76439	24.881	4.28085e-05	0.00727492
	ENSMUSG00000026235.15	Epha4	0.245166	4.30871	5.82318	0.0238122	0.199958
	ENSMUSG00000042460.6	C1galt1	0.244907	5.61444	6.58526	0.0169468	0.170823
	ENSMUSG00000022894.7	Adamts5	0.244696	4.13077	8.72762	0.00691511	0.112025
	ENSMUSG00000031629.15	Cenpu	0.244519	0.921504	0.956576	0.337805	0.675921
	ENSMUSG00000044719.6	E230025N22Rik	0.244485	-0.220192	0.425645	0.520332	0.79952
	ENSMUSG00000027981.15	Rnpc3	0.244481	4.13236	4.06825	0.0550124	0.301101
	ENSMUSG00000020151.17	Ptprr	0.244355	1.20151	1.26761	0.271345	0.616377
	ENSMUSG00000071180.6	Smim15	0.24428	5.66382	15.7778	0.000565076	0.0306536
	ENSMUSG00000026753.6	Ppp6c	0.244255	5.8612	12.8172	0.00150997	0.0495716
	ENSMUSG00000067931.7	Zfp948	0.244232	4.22286	10.045	0.00413477	0.0850202
	ENSMUSG00000024993.16	Dennd10	0.244177	4.61963	11.9425	0.00205434	0.0590547
	ENSMUSG00000035597.20	Prpf39	0.244151	5.83358	8.12123	0.00884043	0.127065
	ENSMUSG00000039221.11	Rpl22l1	0.244106	5.2335	11.2757	0.00261325	0.0674625
	ENSMUSG00000018500.3	Adora2b	0.244077	3.85483	9.10439	0.00595368	0.104275
	ENSMUSG00000078956.5	Gm14221	0.2437	2.29104	1.26803	0.271267	0.616377
	ENSMUSG00000022548.15	Apod	0.243657	6.03311	1.76476	0.196523	0.538325
	ENSMUSG00000029375.7	Cxcl15	0.243476	10.4606	11.6577	0.00227527	0.0621094
	ENSMUSG00000028167.16	Bdh2	0.243233	0.464748	2.31991	0.231713	0.576672
	ENSMUSG00000027570.16	Col9a3	0.243034	0.769702	1.23897	0.276692	0.621911
	ENSMUSG00000025175.13	Fn3k	0.242967	1.37163	1.38407	0.250944	0.597686
	ENSMUSG00000026166.15	Ccl20	0.242939	0.775797	0.552068	0.464683	0.765885
	ENSMUSG00000093996.3	Fam205a3	0.242907	3.49324	1.4708	0.237019	0.583508
	ENSMUSG00000051504.19	Siglech	0.242845	2.21128	1.21731	0.280826	0.625846
	ENSMUSG00000005705.11	Agrp	0.242844	-0.165362	0.247967	0.623041	0.854212
	ENSMUSG00000030321.16	Efcab12	0.242844	2.10166	3.1348	0.089337	0.378222
	ENSMUSG00000017309.12	Cd300lg	0.242684	4.61831	2.95635	0.0984102	0.397077
	ENSMUSG00000002944.16	Cd36	0.242606	10.093	18.0843	0.000277689	0.0221818
	ENSMUSG00000047044.8	D030056L22Rik	0.242464	4.43731	13.8117	0.00107484	0.0406997
	ENSMUSG00000100235.9	Gm28557	0.242464	1.76736	0.674038	0.419726	0.737504
	ENSMUSG00000005268.21	Prlr	0.242347	-0.0811554	0.702005	0.410375	0.732438
	ENSMUSG00000074634.13	Tmem267	0.242309	2.68645	1.20124	0.283946	0.628729
	ENSMUSG00000086429.11	Gt(ROSA)26Sor	0.242101	3.00754	2.91891	0.100447	0.400987
	ENSMUSG00000095432.10	Zfp748	0.241666	3.63817	6.77449	0.0156037	0.165226
	ENSMUSG00000040435.13	Ppp1r15a	0.241591	6.30565	12.2807	0.0018219	0.05594
	ENSMUSG00000022299.10	Slc25a32	0.241196	4.49113	22.0472	9.00195e-05	0.0114735
	ENSMUSG00000064317.6	Gm10146	0.240962	1.75261	4.3081	0.0488111	0.282218
	ENSMUSG00000051098.7	Mblac2	0.240884	2.59017	3.89413	0.0600735	0.31377
	ENSMUSG00000111197.2	Gm10608	0.240842	0.575664	1.04487	0.316882	0.658217
	ENSMUSG00000111390.2	Gm48796	0.240835	0.912846	1.4509	0.240125	0.586325
	ENSMUSG00000027956.12	Tmem144	0.240792	1.98951	2.55279	0.12318	0.441321
	ENSMUSG00000033319.6	Fem1c	0.240751	5.47629	14.4221	0.000876877	0.0376901
	ENSMUSG00000026872.19	Zeb2	0.240644	6.43221	10.217	0.00387338	0.0828903
	ENSMUSG00000034959.9	Rubcnl	0.240445	2.06853	2.48972	0.127679	0.448176
	ENSMUSG00000035875.16	AI182371	0.24034	1.66497	2.55862	0.122773	0.440885
	ENSMUSG00000095105.3	Edaradd	0.24024	1.04584	1.10794	0.30301	0.646287
	ENSMUSG00000069114.9	Zbtb10	0.24019	3.93691	8.17157	0.00866001	0.125303
	ENSMUSG00000107499.2	Ccdc142	0.239981	1.26591	1.28296	0.268536	0.61409
	ENSMUSG00000089669.8	Tnfsf13	0.239834	4.27369	7.57057	0.0111084	0.140428
	ENSMUSG00000041540.17	Sox5	0.239768	3.1289	4.74614	0.0394121	0.251258
	ENSMUSG00000058900.6	ENSMUSG00000058900.6	0.239675	3.25205	7.83376	0.00995323	0.133853
	ENSMUSG00000033157.18	Abhd10	0.239641	3.43758	5.89231	0.0230766	0.197049
	ENSMUSG00000039081.11	Zfp503	0.239596	6.05244	6.08413	0.0211644	0.187274
	ENSMUSG00000006462.8	A530013C23Rik	0.239534	-0.14086	0.843011	0.36767	0.70093
	ENSMUSG00000021874.14	4933413J09Rik	0.239481	-0.269357	0.867501	0.409128	0.731717
	ENSMUSG00000026525.10	Opn3	0.239399	0.742945	0.889848	0.354916	0.690026
	ENSMUSG00000103857.2	Gm37249	0.239378	1.62057	2.25658	0.146088	0.475108
	ENSMUSG00000039396.12	Neil3	0.239258	0.953682	1.07477	0.3102	0.651617
	ENSMUSG00000083012.10	ENSMUSG00000083012.10	0.239224	0.981752	0.160015	0.69268	0.882856
	ENSMUSG00000031257.15	Nox1	0.239205	0.361815	0.454941	0.506442	0.791512
	ENSMUSG00000104126.2	Gm37486	0.239193	2.08953	2.23828	0.147663	0.476349
	ENSMUSG00000055235.12	Wdr86	0.239169	1.57339	1.51754	0.229923	0.57469
	ENSMUSG00000102691.2	Gm37780	0.239041	0.354258	1.017	0.323289	0.663186
	ENSMUSG00000026893.5	Gca	0.238749	3.95774	6.05547	0.0214386	0.188792
	ENSMUSG00000027420.14	Bfsp1	0.238595	1.54807	2.89973	0.101509	0.402369
	ENSMUSG00000050765.4	Gm5084	0.238571	0.463499	1.16365	0.29143	0.63567
	ENSMUSG00000027016.18	Zfp385b	0.238517	2.21667	2.77059	0.109011	0.415843
	ENSMUSG00000029695.14	Aass	0.238503	3.16451	5.44221	0.0283638	0.215797
	ENSMUSG00000052192.6	Gm5963	0.238466	0.249428	0.87255	0.359551	0.693207
	ENSMUSG00000030672.13	Mylpf	0.23838	1.01681	0.127285	0.724381	0.898042
	ENSMUSG00000050668.11	Gpatch11	0.238328	4.16521	23.6855	5.82384e-05	0.0085002
	ENSMUSG00000050730.18	Arhgap42	0.238244	5.28321	6.8687	0.0149793	0.161174
	ENSMUSG00000025915.15	Sgk3	0.238042	4.54626	11.4654	0.00243904	0.0647447
	ENSMUSG00000055202.12	Zfp811	0.237828	0.357862	1.17501	0.289141	0.633305
	ENSMUSG00000031517.9	Gpm6a	0.237765	5.67427	13.6656	0.00112914	0.0417325
	ENSMUSG00000022674.16	Ube2v2	0.237566	4.73621	5.65794	0.0256783	0.206865
	ENSMUSG00000075033.5	Nxpe3	0.237554	4.33104	8.22556	0.00847101	0.123854
	ENSMUSG00000034071.16	Zfp551	0.237375	0.357432	1.31413	0.262946	0.609671
	ENSMUSG00000057440.9	Mpp7	0.237223	4.6273	6.9805	0.0142738	0.158458
	ENSMUSG00000021597.17	Slf1	0.237125	3.31654	5.79666	0.0241013	0.201045
	ENSMUSG00000030759.17	Far1	0.23679	5.85965	6.96648	0.0143602	0.158649
	ENSMUSG00000035948.14	Acss3	0.236758	3.31595	3.98769	0.0572915	0.306699
	ENSMUSG00000021023.15	Prorp	0.236707	2.97212	5.27178	0.0307074	0.222975
	ENSMUSG00000053199.14	Arhgap20	0.236463	4.12768	2.62912	0.117981	0.432548
	ENSMUSG00000031351.16	Zfp185	0.236032	3.80741	9.2418	0.00564038	0.102451
	ENSMUSG00000038422.3	Hdhd3	0.235976	2.11492	3.2186	0.0854114	0.370223
	ENSMUSG00000033644.6	Piwil2	0.235842	0.247609	1.01666	0.323367	0.663186
	ENSMUSG00000029836.16	Cbx3	0.235821	6.07461	7.47027	0.0115868	0.142747
	ENSMUSG00000038526.15	Car14	0.235812	4.55392	0.990596	0.329523	0.669475
	ENSMUSG00000028035.14	Dnajb4	0.235416	6.50066	19.8076	0.000167854	0.0166543
	ENSMUSG00000114529.2	Gm4939	0.235271	0.247775	0.771227	0.388543	0.716994
	ENSMUSG00000028407.5	Smim27	0.235249	2.49084	4.48068	0.0448361	0.270892
	ENSMUSG00000050312.13	Nsun3	0.235115	3.36388	6.16867	0.020378	0.184071
	ENSMUSG00000021112.10	Pals1	0.234967	6.13586	8.94829	0.00633296	0.107123
	ENSMUSG00000043518.8	Rai2	0.234962	3.63475	7.71681	0.0104494	0.136805
	ENSMUSG00000100691.3	2010320M18Rik	0.234866	2.88139	3.53285	0.0723554	0.341374
	ENSMUSG00000036168.16	Ccdc38	0.234839	-0.0277116	0.92056	0.374175	0.705138
	ENSMUSG00000117662.3	Gm4013	0.234792	0.811466	1.13888	0.296504	0.639731
	ENSMUSG00000021367.9	Edn1	0.234785	5.25857	1.94698	0.175687	0.516076
	ENSMUSG00000086370.11	Ftx	0.234783	3.59898	6.88984	0.014843	0.160904
	ENSMUSG00000030494.14	Rhpn2	0.234577	4.35712	11.9757	0.00203015	0.058749
	ENSMUSG00000031853.6	Map3k21	0.234558	1.83658	3.2631	0.0834076	0.366115
	ENSMUSG00000030158.13	Clec12b	0.234481	2.98749	1.89828	0.18098	0.522069
	ENSMUSG00000020427.12	Igfbp3	0.234447	7.30673	8.74791	0.00685919	0.111327
	ENSMUSG00000021707.6	Dhfr	0.234313	2.5852	4.28092	0.0494726	0.284274
	ENSMUSG00000029334.15	Prkg2	0.234145	4.57257	6.15705	0.0204841	0.184469
	ENSMUSG00000091803.8	Cox16	0.234112	4.08797	9.32184	0.00546622	0.100799
	ENSMUSG00000038225.16	Primpol	0.234086	3.5121	9.74532	0.00463769	0.0909385
	ENSMUSG00000106734.5	Gm20559	0.234081	6.3242	10.7366	0.00318731	0.0745599
	ENSMUSG00000031637.14	Lrp2bp	0.233823	0.430459	0.957223	0.337644	0.675757
	ENSMUSG00000048249.15	Crebrf	0.233756	6.12371	18.5599	0.000241139	0.0201927
	ENSMUSG00000029120.11	Ppp2r2c	0.23371	1.41105	0.601978	0.445401	0.75411
	ENSMUSG00000034533.11	Scn10a	0.233696	-0.383179	0.474011	0.497748	0.786723
	ENSMUSG00000042938.9	Gm14117	0.233687	2.08665	3.76029	0.0643236	0.32341
	ENSMUSG00000107319.2	Gm42670	0.233643	-0.0729056	0.642581	0.430641	0.743479
	ENSMUSG00000029817.12	Tra2a	0.233506	6.6015	10.4416	0.00355873	0.0788837
	ENSMUSG00000091277.3	Gm1818	0.233433	1.75626	1.57211	0.221974	0.565778
	ENSMUSG00000059554.13	Ccdc28a	0.233237	2.78366	6.21359	0.0199733	0.183047
	ENSMUSG00000026950.19	Neb	0.233191	0.877102	0.251002	0.620933	0.853231
	ENSMUSG00000034810.8	Scn7a	0.233177	8.02444	3.62332	0.069031	0.33394
	ENSMUSG00000101335.2	Gm28229	0.233138	1.68189	3.1331	0.0894187	0.378229
	ENSMUSG00000019878.9	Hsf2	0.233117	3.96204	12.8849	0.00147495	0.0486987
	ENSMUSG00000087141.2	Plcxd2	0.232654	1.33346	2.06591	0.163532	0.501775
	ENSMUSG00000019997.12	Ccn2	0.232652	8.05849	3.743	0.0648972	0.324561
	ENSMUSG00000042385.15	Gzmk	0.232561	0.859288	0.620154	0.438696	0.749036
	ENSMUSG00000110185.3	Igip	0.232385	5.38556	14.2914	0.000915658	0.0379601
	ENSMUSG00000002100.16	Mybpc3	0.232057	3.91111	0.702714	0.410142	0.732325
	ENSMUSG00000039519.7	Cyp7b1	0.23201	2.4278	2.69833	0.113489	0.424365
	ENSMUSG00000004151.18	Etv1	0.231905	3.65238	9.14335	0.00586296	0.104128
	ENSMUSG00000110277.3	Gm45871	0.231721	3.05715	4.56907	0.0429421	0.264051
	ENSMUSG00000087365.10	C430049B03Rik	0.231662	2.89053	1.9046	0.180282	0.521443
	ENSMUSG00000047496.7	Rnf152	0.231503	1.51282	1.6614	0.209696	0.553432
	ENSMUSG00000079559.6	Pou2af3	0.231436	2.98515	6.3479	0.0188155	0.177997
	ENSMUSG00000020544.15	Cox11	0.231404	2.79235	4.67313	0.0408265	0.256037
	ENSMUSG00000031176.9	Dynlt3	0.231369	6.54091	8.85276	0.0065781	0.108699
	ENSMUSG00000031337.17	Mtm1	0.231325	3.74458	6.40941	0.0183103	0.176819
	ENSMUSG00000036596.7	Cpz	0.231231	2.16127	1.26094	0.272579	0.618116
	ENSMUSG00000027883.16	Gpsm2	0.231104	4.5908	11.6759	0.00226036	0.0618975
	ENSMUSG00000040128.10	Pnrc1	0.230885	6.40972	15.1209	0.000697671	0.0345296
	ENSMUSG00000096967.4	Gm26621	0.230794	2.37801	2.10585	0.15968	0.495195
	ENSMUSG00000055660.10	Mettl4	0.23066	4.33049	6.52917	0.0173691	0.173031
	ENSMUSG00000042589.19	Cux2	0.230648	3.23289	7.265	0.0126383	0.150085
	ENSMUSG00000048482.15	Bdnf	0.230411	4.48224	6.59925	0.0168432	0.170465
	ENSMUSG00000104671.2	Gm43062	0.230359	0.224354	0.794083	0.381713	0.710852
	ENSMUSG00000087119.5	Atg4a-ps	0.230357	2.08843	2.30877	0.141707	0.468144
	ENSMUSG00000019789.10	Hey2	0.23027	2.33898	2.85347	0.104125	0.407386
	ENSMUSG00000092278.2	Gm8752	0.230245	0.185435	0.143664	0.707997	0.889641
	ENSMUSG00000025185.15	Loxl4	0.23014	2.01257	1.21158	0.281933	0.626827
	ENSMUSG00000027165.17	Iftap	0.230109	3.50143	6.46202	0.01789	0.175322
	ENSMUSG00000096336.3	Igkv1-135	0.230102	1.33028	0.234595	0.632527	0.857455
	ENSMUSG00000039376.14	Synpo2l	0.230027	2.42065	0.937542	0.342565	0.679157
	ENSMUSG00000037944.9	Ccr7	0.230003	4.58598	4.67673	0.0407555	0.255777
	ENSMUSG00000042599.9	Kdm7a	0.229902	5.1011	11.3941	0.00250299	0.0656305
	ENSMUSG00000032258.16	Lca5	0.229627	3.65213	6.15421	0.0205101	0.184502
	ENSMUSG00000045031.19	Cetn4	0.229581	2.63915	2.81522	0.106347	0.411662
	ENSMUSG00000050195.9	Scd4	0.229386	1.54307	1.71228	0.20308	0.546208
	ENSMUSG00000029275.19	Gfi1	0.229346	0.687448	0.643924	0.430166	0.743103
	ENSMUSG00000117145.2	Gng5c	0.229304	-0.322607	0.653583	0.439952	0.750086
	ENSMUSG00000018846.9	Pank3	0.229089	5.97339	6.59675	0.0168617	0.170465
	ENSMUSG00000120133.1	ENSMUSG00000120133.1	0.228853	0.0550426	0.520295	0.477682	0.774791
	ENSMUSG00000037857.17	Nufip2	0.22877	5.13483	11.2237	0.00266338	0.0679445
	ENSMUSG00000015702.14	Anxa9	0.228722	2.70912	3.15303	0.0884653	0.37588
	ENSMUSG00000096146.3	Kcnj11	0.228716	2.28185	1.11423	0.301672	0.645029
	ENSMUSG00000120121.1	ENSMUSG00000120121.1	0.228698	0.162913	0.813231	0.376126	0.706426
	ENSMUSG00000037007.18	Zfp113	0.228612	3.61969	7.82716	0.00998054	0.133853
	ENSMUSG00000020798.15	Spns3	0.228569	0.149903	0.553281	0.464199	0.765597
	ENSMUSG00000022051.16	Bnip3l	0.228555	7.31799	14.5228	0.000848201	0.0376901
	ENSMUSG00000025938.17	Slco5a1	0.228541	2.0523	2.25372	0.146333	0.475239
	ENSMUSG00000028381.9	Ugcg	0.228438	5.86711	7.75033	0.0103044	0.136037
	ENSMUSG00000068373.16	D430041D05Rik	0.228436	1.22822	1.08759	0.307395	0.649318
	ENSMUSG00000028133.18	Rwdd3	0.228408	2.04796	2.9242	0.100156	0.400522
	ENSMUSG00000105867.3	Gm42517	0.22834	0.663032	0.91712	0.347778	0.683722
	ENSMUSG00000035164.9	Zc3h12c	0.228333	3.38776	5.2653	0.0308006	0.223295
	ENSMUSG00000027499.13	Pkia	0.228269	4.80121	5.58664	0.0265332	0.209808
	ENSMUSG00000039385.6	Cdh6	0.227933	1.70735	1.31581	0.26265	0.609497
	ENSMUSG00000072594.4	Gm16439	0.227816	2.06794	2.23402	0.148031	0.477016
	ENSMUSG00000079014.5	Serpina3i	0.227805	0.817082	0.706724	0.408829	0.731637
	ENSMUSG00000058258.16	Idi1	0.227512	6.13522	4.52948	0.0437791	0.267113
	ENSMUSG00000034297.15	Med13	0.22751	5.76361	2.97259	0.0975416	0.395876
	ENSMUSG00000031553.17	Adam3	0.227478	1.21942	1.61524	0.215935	0.558825
	ENSMUSG00000091709.2	Gm17189	0.227363	0.132764	0.775575	0.38723	0.716157
	ENSMUSG00000112433.2	Gm30122	0.227295	1.60143	1.71794	0.20236	0.545521
	ENSMUSG00000121309.1	ENSMUSG00000121309.1	0.227086	1.75001	2.73008	0.111495	0.421517
	ENSMUSG00000079470.9	Utp14b	0.227053	2.25754	3.16532	0.0878834	0.374769
	ENSMUSG00000116165.2	Pdxp	0.226839	1.599	2.06857	0.163272	0.501444
	ENSMUSG00000038094.16	Atp13a4	0.226767	2.30925	2.82968	0.1055	0.410493
	ENSMUSG00000054604.8	Cggbp1	0.226728	6.5985	11.6023	0.00232113	0.0625409
	ENSMUSG00000025037.7	Maoa	0.226656	5.78603	8.34354	0.00807355	0.121166
	ENSMUSG00000102070.2	Gm28661	0.226631	11.7065	4.97613	0.035303	0.23826
	ENSMUSG00000114133.2	Btf3l4b	0.226596	4.08204	3.9773	0.0575931	0.307553
	ENSMUSG00000025036.8	Sfxn2	0.226416	4.93237	16.718	0.000420727	0.0273141
	ENSMUSG00000032369.14	Plscr1	0.226412	6.0001	16.2371	0.000488783	0.0288831
	ENSMUSG00000031283.17	Chrdl1	0.226392	4.68005	3.81174	0.0626507	0.319527
	ENSMUSG00000043383.6	Or13p4	0.226328	0.913762	0.553962	0.463927	0.765439
	ENSMUSG00000039831.17	Arhgap29	0.226302	7.69717	11.5224	0.00238915	0.0638114
	ENSMUSG00000044350.15	Lacc1	0.22625	3.61684	7.23764	0.0127863	0.150569
	ENSMUSG00000109089.3	4833411C07Rik	0.226203	0.112213	0.806668	0.378027	0.707408
	ENSMUSG00000020135.14	Apc2	0.226186	3.33869	2.94607	0.0989646	0.398479
	ENSMUSG00000029279.16	Brdt	0.225709	1.44634	2.39625	0.13471	0.457615
	ENSMUSG00000047669.9	Msl3l2	0.225676	4.05161	15.9216	0.000539886	0.0299948
	ENSMUSG00000039783.16	Kmo	0.225617	2.91165	3.30537	0.0815543	0.362199
	ENSMUSG00000005220.11	Corin	0.225529	2.10274	0.967015	0.335233	0.673431
	ENSMUSG00000032121.10	Tmem218	0.225264	2.95569	5.48302	0.0278327	0.214614
	ENSMUSG00000072066.8	6720489N17Rik	0.225026	1.7027	1.64483	0.21191	0.554489
	ENSMUSG00000039789.8	Zfp597	0.224848	3.73634	9.07368	0.00602628	0.10509
	ENSMUSG00000031910.15	Has3	0.224802	1.78026	1.54358	0.226086	0.571182
	ENSMUSG00000046550.9	Spin2c	0.224762	0.195706	1.1522	0.293761	0.637158
	ENSMUSG00000019774.9	Mtrf1l	0.224735	2.65466	5.64627	0.0258161	0.207559
	ENSMUSG00000022797.17	Tfrc	0.224598	5.78905	5.26213	0.0308462	0.223467
	ENSMUSG00000044229.10	Nxpe4	0.224596	4.93879	4.98804	0.0351037	0.237783
	ENSMUSG00000098076.2	Gm6981	0.224521	-0.111983	0.54281	0.46841	0.768302
	ENSMUSG00000029179.15	Zcchc4	0.22444	3.79154	13.9267	0.0010341	0.0400314
	ENSMUSG00000038700.5	Hoxb5	0.224416	4.43876	8.37719	0.00796398	0.119833
	ENSMUSG00000089706.9	B230216N24Rik	0.224363	0.922071	1.2125	0.281756	0.62672
	ENSMUSG00000073405.7	H2-T-ps	0.224327	0.744319	0.940509	0.341817	0.6787
	ENSMUSG00000027555.9	Car13	0.224285	2.76768	2.39613	0.134718	0.457615
	ENSMUSG00000021690.11	Jmy	0.224172	5.34131	8.66209	0.00709911	0.113023
	ENSMUSG00000048047.4	Zbtb33	0.224075	4.08666	1.64577	0.211784	0.554457
	ENSMUSG00000037169.16	Mycn	0.224027	1.41071	0.464016	0.502271	0.789582
	ENSMUSG00000053907.11	Mat2a	0.224023	8.59989	12.7562	0.0015423	0.0503153
	ENSMUSG00000058291.15	Zfp68	0.223857	5.71934	23.443	6.20523e-05	0.00888837
	ENSMUSG00000026761.13	Orc4	0.223817	4.63905	6.85841	0.0150461	0.161627
	ENSMUSG00000046567.11	4930430F08Rik	0.223763	2.35562	3.70473	0.0661876	0.328268
	ENSMUSG00000020053.19	Igf1	0.223749	4.14616	1.63866	0.212742	0.55512
	ENSMUSG00000027132.4	Katnbl1	0.223668	4.00453	8.71229	0.00695768	0.11231
	ENSMUSG00000078851.5	H2ac25	0.223596	4.49092	13.2859	0.00128477	0.0449722
	ENSMUSG00000020892.11	Aloxe3	0.223555	1.1664	0.31696	0.578661	0.831304
	ENSMUSG00000026589.15	Sec16b	0.223501	3.44619	5.80919	0.0239642	0.200374
	ENSMUSG00000058093.14	Zfp729b	0.223382	3.67097	2.8944	0.101807	0.402627
	ENSMUSG00000073676.5	Hspe1	0.223375	5.16365	8.17893	0.00863398	0.12503
	ENSMUSG00000037106.9	Fer1l6	0.223344	0.510179	0.146358	0.705407	0.888176
	ENSMUSG00000026839.18	Upp2	0.223226	1.7713	3.4449	0.0757637	0.348722
	ENSMUSG00000046318.17	Ccbe1	0.223187	4.11369	3.71383	0.0658783	0.327577
	ENSMUSG00000025077.15	Dclre1a	0.223093	3.7724	9.20997	0.00571131	0.102697
	ENSMUSG00000081885.2	Gm13231	0.223082	-0.139716	0.539678	0.469682	0.769678
	ENSMUSG00000070527.4	Mkrn3	0.222989	0.972796	1.69631	0.205129	0.547958
	ENSMUSG00000023047.12	Amhr2	0.222979	1.96077	1.81603	0.190368	0.531805
	ENSMUSG00000053192.10	Mllt11	0.222933	3.11884	7.10064	0.0135563	0.153585
	ENSMUSG00000050555.10	Hyls1	0.222914	2.85585	3.28379	0.0824945	0.364548
	ENSMUSG00000103421.2	Golt1a	0.222865	-0.0710085	0.239656	0.628898	0.856483
	ENSMUSG00000027079.16	Clp1	0.222483	3.79384	9.5667	0.00496906	0.0948609
	ENSMUSG00000030650.19	Tmc5	0.222197	1.94485	0.428791	0.518808	0.798448
	ENSMUSG00000045201.7	Lrrc3b	0.222049	0.332209	0.568448	0.458208	0.761486
	ENSMUSG00000087165.9	2010001A14Rik	0.221844	1.05437	1.45353	0.239711	0.586165
	ENSMUSG00000048450.11	Msx1	0.221616	2.39349	2.48636	0.127925	0.448331
	ENSMUSG00000074925.5	Ptar1	0.221292	5.61547	6.66346	0.0163769	0.168233
	ENSMUSG00000045455.10	Gm9797	0.221285	1.49273	0.337181	0.566873	0.823926
	ENSMUSG00000056130.11	Ticam2	0.221267	2.32078	3.18236	0.0870839	0.373364
	ENSMUSG00000039824.5	Myl6b	0.221054	0.762305	0.616372	0.440078	0.750144
	ENSMUSG00000107962.2	Gm43980	0.220947	-0.0659169	0.330851	0.570511	0.825616
	ENSMUSG00000085347.3	Hk1os	0.220908	-0.0113537	0.903626	0.400764	0.726353
	ENSMUSG00000026971.16	Itgb6	0.220905	5.59507	6.78447	0.0155363	0.164713
	ENSMUSG00000048371.9	Pdp2	0.220846	3.64802	6.08538	0.0211524	0.187274
	ENSMUSG00000058152.9	Chsy3	0.220601	1.98175	2.12382	0.157981	0.492882
	ENSMUSG00000013089.16	Etv5	0.220593	7.65219	10.581	0.0033777	0.0763351
	ENSMUSG00000071256.5	Zfp213	0.220521	3.69709	13.227	0.00131097	0.045088
	ENSMUSG00000056383.11	AI987944	0.220449	3.86322	5.55008	0.0269839	0.211742
	ENSMUSG00000009772.16	Nuak2	0.220428	4.66983	6.57267	0.0170406	0.171535
	ENSMUSG00000019893.14	Ros1	0.220333	1.31866	0.864299	0.361793	0.695885
	ENSMUSG00000057396.8	Zfp759	0.220324	1.94751	1.82309	0.189539	0.531467
	ENSMUSG00000045312.13	Lhfpl2	0.220315	3.77008	2.73391	0.111257	0.421013
	ENSMUSG00000083378.4	Gm13196	0.220176	-0.159803	0.597807	0.446962	0.75545
	ENSMUSG00000063488.7	Zkscan7	0.220152	3.8131	6.36143	0.0187031	0.177843
	ENSMUSG00000027356.9	Fermt1	0.220119	2.34367	1.40812	0.24698	0.59271
	ENSMUSG00000031639.13	Tlr3	0.220087	5.51244	5.51365	0.0274413	0.213208
	ENSMUSG00000028252.21	Ccnc	0.219977	4.22738	5.45983	0.0281331	0.215399
	ENSMUSG00000115837.2	9130002K18Rik	0.219959	0.668607	1.0894	0.307001	0.649129
	ENSMUSG00000121066.1	ENSMUSG00000121066.1	0.219897	2.53608	1.85242	0.186142	0.528609
	ENSMUSG00000020154.11	Ptprb	0.219897	9.35303	15.5755	0.000602731	0.0317555
	ENSMUSG00000062078.16	Qki	0.219708	8.13582	5.0017	0.0348766	0.236922
	ENSMUSG00000027796.3	Smad9	0.219566	3.62173	7.38614	0.0120056	0.146039
	ENSMUSG00000009654.5	Oit3	0.219521	0.282188	0.938325	0.342367	0.679059
	ENSMUSG00000058748.10	Zfp958	0.219478	2.72982	3.75659	0.0644461	0.32341
	ENSMUSG00000040124.6	Gorab	0.219411	3.19599	6.34104	0.0188728	0.178141
	ENSMUSG00000021944.16	Gata4	0.219352	1.93177	1.28885	0.267467	0.613396
	ENSMUSG00000113836.2	Gm3325	0.21935	1.00988	0.98619	0.33058	0.670364
	ENSMUSG00000042275.10	Pelo	0.219346	4.7249	5.57621	0.0266609	0.210174
	ENSMUSG00000039701.12	Usp53	0.219325	3.24885	4.14279	0.0529948	0.295373
	ENSMUSG00000055313.16	Pgbd1	0.219257	1.28302	1.62591	0.214473	0.557037
	ENSMUSG00000031604.11	Msmo1	0.219213	5.73108	4.68932	0.040508	0.254814
	ENSMUSG00000024084.9	Qpct	0.219146	3.45003	3.24537	0.0841995	0.368024
	ENSMUSG00000020102.16	Slc16a7	0.219067	4.2517	4.04713	0.0555998	0.302691
	ENSMUSG00000076475.3	Trbv19	0.218967	-0.398403	0.352885	0.558042	0.818482
	ENSMUSG00000054894.7	Dmac2l	0.218831	3.13906	4.49517	0.0445193	0.269571
	ENSMUSG00000026097.10	Ormdl1	0.218714	3.73383	10.3467	0.00368817	0.0800944
	ENSMUSG00000109714.3	Gm35021	0.2185	0.0936608	0.651367	0.427548	0.741939
	ENSMUSG00000022523.11	Fgf12	0.218471	1.2545	1.11055	0.302454	0.64598
	ENSMUSG00000050945.9	Zfp438	0.218454	3.2157	8.38489	0.00793915	0.119771
	ENSMUSG00000030306.15	Tmtc1	0.218415	6.49258	12.3763	0.00176156	0.0553168
	ENSMUSG00000121225.1	ENSMUSG00000121225.1	0.218301	2.25105	2.11028	0.159259	0.494698
	ENSMUSG00000030148.16	Clec4a2	0.21829	2.49786	2.81368	0.106438	0.411921
	ENSMUSG00000021831.10	Ero1a	0.218253	5.96252	12.3567	0.0017737	0.0554971
	ENSMUSG00000037440.9	Vnn1	0.218168	4.44089	2.46609	0.129415	0.450112
	ENSMUSG00000030157.6	Clec2d	0.218145	7.50312	17.1232	0.000371367	0.0260619
	ENSMUSG00000028572.14	Hook1	0.21813	3.57561	5.46855	0.0280197	0.215399
	ENSMUSG00000025525.13	Apool	0.218116	3.26222	4.75434	0.0392566	0.250951
	ENSMUSG00000045877.3	4933415A04Rik	0.217883	-0.277696	0.676703	0.418821	0.737135
	ENSMUSG00000062210.14	Tnfaip8	0.217771	4.91365	7.99931	0.00929473	0.130352
	ENSMUSG00000026434.13	Nucks1	0.217071	6.4391	17.2895	0.000352959	0.0252818
	ENSMUSG00000075700.11	Selenot	0.216949	7.22833	18.7071	0.000230906	0.0198145
	ENSMUSG00000100680.3	1810044D09Rik	0.216889	0.320155	0.929665	0.344563	0.680489
	ENSMUSG00000073987.5	Ggh	0.21688	4.29471	7.1555	0.013242	0.152411
	ENSMUSG00000004267.17	Eno2	0.216855	2.59618	3.62199	0.0690787	0.33394
	ENSMUSG00000072596.5	Ear2	0.216817	6.35287	3.23401	0.0847112	0.368855
	ENSMUSG00000029804.18	Herc3	0.216686	3.89801	6.55216	0.0171946	0.172433
	ENSMUSG00000071855.6	Ccdc112	0.216684	2.63036	5.50591	0.0275396	0.2134
	ENSMUSG00000027808.9	Serp1	0.216681	7.28316	15.2167	0.000676382	0.0337879
	ENSMUSG00000091931.6	Gon7	0.216603	2.3462	2.79764	0.107387	0.413471
	ENSMUSG00000036478.9	Btg1	0.216557	7.26272	20.1795	0.000151	0.0156733
	ENSMUSG00000029267.18	Mtf2	0.216543	3.98971	5.15312	0.0324663	0.229048
	ENSMUSG00000089694.3	Nat8f7	0.216531	1.26068	0.427485	0.51944	0.798791
	ENSMUSG00000028522.17	Mier1	0.216477	6.05178	7.79469	0.010116	0.134266
	ENSMUSG00000048040.9	Arxes2	0.216429	3.90183	1.85954	0.185329	0.527763
	ENSMUSG00000120926.1	ENSMUSG00000120926.1	0.216377	3.08623	3.9258	0.0591149	0.310985
	ENSMUSG00000087598.10	Zfp111	0.21624	3.61878	9.15281	0.00584115	0.103895
	ENSMUSG00000083757.3	Rps15a-ps4	0.216059	3.52678	4.81481	0.0381318	0.246776
	ENSMUSG00000019809.17	Pex3	0.216048	4.57405	10.6108	0.00334025	0.0758844
	ENSMUSG00000021670.15	Hmgcr	0.216027	5.76566	7.01823	0.014044	0.156754
	ENSMUSG00000043939.17	A530064D06Rik	0.215874	1.50905	0.937385	0.342605	0.679157
	ENSMUSG00000021532.12	Fastkd3	0.215703	3.17538	5.27888	0.0306055	0.222975
	ENSMUSG00000071172.14	Srsf3	0.215576	7.59669	10.9542	0.00294053	0.0717902
	ENSMUSG00000106383.2	E330034L11Rik	0.215501	1.89062	3.11959	0.0900714	0.378604
	ENSMUSG00000031939.17	Taf1d	0.215459	4.73678	12.2063	0.00187047	0.0566831
	ENSMUSG00000000031.18	H19	0.215416	2.03722	0.0781999	0.782147	0.923363
	ENSMUSG00000046351.12	Zfp322a	0.215406	4.59239	7.80711	0.010064	0.134185
	ENSMUSG00000029270.11	Dipk1a	0.215313	4.5853	8.11327	0.00886934	0.127231
	ENSMUSG00000090659.10	Zfp493	0.215235	1.20415	1.81789	0.190149	0.531643
	ENSMUSG00000050103.19	Agmo	0.215152	3.74974	6.15151	0.0205349	0.184622
	ENSMUSG00000121490.1	ENSMUSG00000121490.1	0.215084	3.28494	5.12494	0.0329005	0.230507
	ENSMUSG00000007908.15	Hmgcll1	0.214988	3.73848	7.8098	0.0100527	0.134185
	ENSMUSG00000026384.14	Ptpn4	0.214688	4.44623	1.57113	0.222114	0.565778
	ENSMUSG00000030008.10	Pradc1	0.214666	3.65754	6.03258	0.0216604	0.189722
	ENSMUSG00000064368.1	mt-Nd6	0.21459	8.97479	3.4688	0.0748198	0.346729
	ENSMUSG00000030865.5	Chp2	0.214546	1.66051	1.28857	0.267519	0.613396
	ENSMUSG00000027068.7	Dhrs9	0.214484	0.726564	0.539098	0.469918	0.769833
	ENSMUSG00000087611.3	4930458D05Rik	0.214483	0.683287	0.696259	0.41227	0.733341
	ENSMUSG00000024800.9	Rpp30	0.214274	2.6713	3.65719	0.0678315	0.330973
	ENSMUSG00000021770.12	Samd8	0.214211	4.72494	14.1673	0.000954223	0.0384395
	ENSMUSG00000025666.17	Tmem47	0.214062	4.9303	2.65753	0.116112	0.428688
	ENSMUSG00000085514.2	Bcas3os2	0.214053	-0.0915272	0.549623	0.465663	0.76597
	ENSMUSG00000057914.16	Cacnb2	0.213926	3.7315	6.63002	0.0166179	0.169444
	ENSMUSG00000051652.5	Lrrc3	0.213878	0.888578	1.52137	0.229353	0.574109
	ENSMUSG00000019818.16	Cd164	0.213858	8.16405	8.03936	0.00914273	0.129087
	ENSMUSG00000018893.16	Mb	0.213676	5.82619	0.817156	0.374995	0.705789
	ENSMUSG00000029422.16	Rsrc2	0.213534	6.14523	21.8453	9.50926e-05	0.0119445
	ENSMUSG00000020010.8	Vnn3	0.213363	3.25036	2.74937	0.110304	0.419068
	ENSMUSG00000020390.13	Ube2b	0.213352	6.45955	31.1586	9.59305e-06	0.00332572
	ENSMUSG00000071748.3	Styx-ps	0.213144	2.48686	1.67241	0.208243	0.551855
	ENSMUSG00000049164.8	Zfp518a	0.213073	3.92552	3.48852	0.074051	0.344868
	ENSMUSG00000073131.13	Vma21	0.213036	4.73265	5.36096	0.0294552	0.219131
	ENSMUSG00000050075.9	Gpr171	0.212749	2.68332	1.91362	0.179292	0.520154
	ENSMUSG00000095930.2	Nim1k	0.212629	1.6089	1.59014	0.219423	0.563144
	ENSMUSG00000090121.11	Abhd12b	0.212473	0.430876	0.410801	0.527635	0.803374
	ENSMUSG00000008999.8	Bmp7	0.212407	2.64082	2.97382	0.0974764	0.395704
	ENSMUSG00000050953.11	Gja1	0.212394	6.71653	4.96253	0.0355322	0.238556
	ENSMUSG00000074194.5	Zfp791	0.212366	1.73755	2.52529	0.125119	0.444064
	ENSMUSG00000046230.12	Vps13a	0.212189	4.36002	12.7803	0.00152942	0.0500206
	ENSMUSG00000036202.17	Rif1	0.212171	4.45172	6.12246	0.0208037	0.186108
	ENSMUSG00000044365.16	Cxxc4	0.212098	0.944514	0.838464	0.368943	0.701465
	ENSMUSG00000120701.1	ENSMUSG00000120701.1	0.212043	-0.110392	0.571649	0.45696	0.761043
	ENSMUSG00000030604.10	Zfp626	0.211919	3.73446	5.59309	0.0264546	0.209471
	ENSMUSG00000082195.4	Gm13034	0.211822	0.836356	1.24129	0.276252	0.621567
	ENSMUSG00000071072.13	Ptges3	0.211503	6.65232	9.23658	0.00565194	0.102451
	ENSMUSG00000095609.3	ENSMUSG00000095609.3	0.211473	2.71796	2.22168	0.149108	0.478106
	ENSMUSG00000100615.2	Gm5511	0.211435	-0.284596	0.439636	0.513615	0.795592
	ENSMUSG00000020256.15	Aldh1l2	0.211383	0.887258	0.833442	0.370357	0.702458
	ENSMUSG00000052477.16	C130026I21Rik	0.211363	1.50304	0.59293	0.4488	0.756539
	ENSMUSG00000093930.3	Hmgcs1	0.211271	6.74094	5.00062	0.0348945	0.236922
	ENSMUSG00000117013.2	Gm30531	0.211144	-0.136355	0.495928	0.48807	0.780754
	ENSMUSG00000025436.13	Atp23	0.211111	1.72074	1.40566	0.247381	0.593345
	ENSMUSG00000043415.6	Otud1	0.211077	5.16432	6.12004	0.0208262	0.186114
	ENSMUSG00000026500.7	Cox20	0.211	3.95353	3.4429	0.0758432	0.348903
	ENSMUSG00000116946.3	Gm41442	0.210901	2.744	3.68331	0.0669227	0.329686
	ENSMUSG00000030699.17	Tbx6	0.210879	2.14684	2.80845	0.106746	0.412286
	ENSMUSG00000024597.12	Slc12a2	0.210705	6.33219	6.42144	0.0182132	0.176491
	ENSMUSG00000085741.10	5430405H02Rik	0.210658	3.56344	3.85356	0.0613273	0.316811
	ENSMUSG00000027820.13	Mme	0.210598	6.65152	7.26844	0.0126199	0.150061
	ENSMUSG00000037262.8	Kin	0.210503	3.82133	7.82945	0.00997105	0.133853
	ENSMUSG00000027427.14	Polr3f	0.210238	4.57232	9.18963	0.00575715	0.102872
	ENSMUSG00000107724.2	Gm16042	0.210225	3.90422	8.08908	0.00895782	0.12786
	ENSMUSG00000039990.17	Edrf1	0.210215	4.37279	7.91991	0.00960438	0.132761
	ENSMUSG00000019792.9	Trmt11	0.210081	2.97422	3.88668	0.0603014	0.314365
	ENSMUSG00000045464.7	2810002D19Rik	0.210021	2.69281	3.89149	0.0601543	0.31377
	ENSMUSG00000108084.3	Gm7932	0.209973	0.600783	0.734942	0.399763	0.725665
	ENSMUSG00000031444.17	F10	0.209952	2.92559	2.09476	0.160738	0.496898
	ENSMUSG00000025626.17	Phf6	0.209948	4.33437	3.24314	0.0842999	0.368088
	ENSMUSG00000041757.18	Plekha6	0.209906	6.41567	5.53929	0.0271185	0.212248
	ENSMUSG00000020787.15	P2rx1	0.209896	2.21122	1.29525	0.266314	0.612422
	ENSMUSG00000041347.6	Bdkrb1	0.209857	2.25391	1.80418	0.191769	0.532669
	ENSMUSG00000026586.17	Prrx1	0.20966	4.20745	5.48363	0.0278248	0.214614
	ENSMUSG00000026564.10	Dusp27	0.209631	0.450362	0.38946	0.538469	0.809104
	ENSMUSG00000030629.16	Zfand6	0.209531	6.0251	13.7148	0.00111053	0.0413976
	ENSMUSG00000044453.6	Ffar1	0.209426	1.43072	0.941441	0.341582	0.678492
	ENSMUSG00000050010.9	Shisa3	0.209235	1.49859	0.875458	0.358766	0.692754
	ENSMUSG00000026228.7	Htr2b	0.20921	1.34063	0.442689	0.51217	0.795245
	ENSMUSG00000073902.6	Gvin3	0.209199	3.583	2.10657	0.159611	0.495195
	ENSMUSG00000112110.3	Gm15608	0.209179	0.290246	1.24595	0.297772	0.640554
	ENSMUSG00000098183.2	Gm27010	0.209175	-0.0683972	0.693121	0.413311	0.734019
	ENSMUSG00000042225.4	Ammecr1	0.209134	2.3821	2.54853	0.123478	0.441656
	ENSMUSG00000033533.15	Acsm1	0.209082	3.53937	0.863926	0.361895	0.695927
	ENSMUSG00000005583.17	Mef2c	0.209018	4.98237	7.15707	0.0132331	0.152411
	ENSMUSG00000026621.14	Mtarc1	0.208841	0.0423937	0.152961	0.699171	0.885387
	ENSMUSG00000021103.13	Mnat1	0.208826	3.93298	7.36511	0.0121129	0.146726
	ENSMUSG00000024878.10	Cbwd1	0.208809	3.11747	4.13286	0.0532586	0.295942
	ENSMUSG00000050428.8	Fbxo46	0.208795	4.32411	8.94335	0.00634539	0.107123
	ENSMUSG00000040520.8	Manea	0.208658	4.55614	6.59087	0.0169052	0.170615
	ENSMUSG00000107200.2	Gm43039	0.208526	0.108803	0.698015	0.41169	0.733341
	ENSMUSG00000000058.7	Cav2	0.208511	8.09118	4.79418	0.0385114	0.248177
	ENSMUSG00000046794.10	Ppp1r3b	0.208356	3.73692	1.185	0.287149	0.631589
	ENSMUSG00000078486.4	Perm1	0.208221	3.19337	1.62478	0.214627	0.557355
	ENSMUSG00000026941.17	Mamdc4	0.208175	1.58593	1.88604	0.18234	0.524116
	ENSMUSG00000092586.9	Ly6g6c	0.208111	1.52344	0.189604	0.667137	0.873335
	ENSMUSG00000028015.4	Ctso	0.208035	6.24199	15.9565	0.000533961	0.0298872
	ENSMUSG00000091764.5	Zfp964	0.208035	2.10761	1.90113	0.180664	0.52182
	ENSMUSG00000107225.2	Gm43637	0.208022	-0.239071	0.431677	0.517417	0.79752
	ENSMUSG00000034785.16	Dio1	0.207747	0.0535919	0.370495	0.548451	0.814082
	ENSMUSG00000052131.8	Akr1b7	0.207594	0.942558	0.974233	0.333471	0.67245
	ENSMUSG00000113262.2	Gm48551	0.207395	1.92717	1.46369	0.238122	0.584481
	ENSMUSG00000019850.12	Tnfaip3	0.207244	5.2709	7.72887	0.0103969	0.136735
	ENSMUSG00000017146.13	Brca1	0.207243	1.43301	0.926905	0.345266	0.681193
	ENSMUSG00000022159.17	Rab2b	0.207206	4.40759	16.4813	0.000452845	0.0281453
	ENSMUSG00000067203.11	ENSMUSG00000067203.11	0.207142	0.844267	0.268905	0.608815	0.848254
	ENSMUSG00000031965.16	Tbx20	0.207058	2.03998	0.665424	0.422672	0.73887
	ENSMUSG00000032033.12	Barx2	0.207047	1.69121	0.721774	0.403956	0.728633
	ENSMUSG00000039835.17	Nhsl1	0.206979	3.96156	3.05828	0.0931036	0.385998
	ENSMUSG00000032328.13	Tmem30a	0.206925	7.69524	7.04454	0.0138863	0.155489
	ENSMUSG00000041828.16	Abca8a	0.20681	6.51201	10.8823	0.0030197	0.0727078
	ENSMUSG00000087408.11	Cers1	0.206754	1.00551	1.03295	0.3196	0.660225
	ENSMUSG00000025245.15	Lztfl1	0.206753	4.6769	13.0519	0.00139227	0.0466951
	ENSMUSG00000044349.17	Snhg11	0.206545	5.80067	3.89335	0.0600972	0.31377
	ENSMUSG00000027200.18	Sema6d	0.206441	6.43974	7.69488	0.0105454	0.137511
	ENSMUSG00000024537.6	Psmg2	0.206308	3.73985	8.07711	0.00900194	0.128094
	ENSMUSG00000044018.4	Mrpl50	0.206299	4.574	19.5014	0.000183265	0.0173591
	ENSMUSG00000035476.10	Tab3	0.206274	3.74816	3.77854	0.0637245	0.321759
	ENSMUSG00000022114.6	Spry2	0.206242	5.16884	5.2615	0.0308554	0.223467
	ENSMUSG00000059588.14	Calcrl	0.206221	9.03714	3.03608	0.0942307	0.388887
	ENSMUSG00000040717.7	Il17rd	0.206125	5.52398	11.7911	0.00216867	0.0611005
	ENSMUSG00000025887.11	Casp12	0.206078	4.22105	3.04907	0.0935695	0.386945
	ENSMUSG00000050069.4	Grem2	0.20601	6.66006	8.77603	0.00678253	0.110556
	ENSMUSG00000043639.16	Rbm20	0.205982	2.33885	0.864821	0.361651	0.695766
	ENSMUSG00000042750.8	Bex2	0.20597	4.76797	4.42067	0.0461753	0.274111
	ENSMUSG00000028696.13	Ipp	0.20582	2.5627	2.63736	0.117436	0.43146
	ENSMUSG00000042828.13	Trim72	0.205675	1.94008	0.649293	0.428275	0.742366
	ENSMUSG00000025537.13	Phkg1	0.205524	1.77374	0.932703	0.34379	0.679697
	ENSMUSG00000085457.5	1110046J04Rik	0.205521	1.83227	1.72721	0.201187	0.543731
	ENSMUSG00000072915.4	Gm12258	0.205513	3.56626	4.28782	0.0493038	0.283648
	ENSMUSG00000048388.4	Fam171b	0.20545	1.4248	1.20045	0.284101	0.628802
	ENSMUSG00000047797.15	Gjb1	0.205403	2.13404	1.41125	0.246469	0.592517
	ENSMUSG00000086247.9	Gm15787	0.205393	0.767155	1.65827	0.234677	0.580713
	ENSMUSG00000053600.9	Zfp472	0.205377	3.2342	6.65961	0.0164045	0.168233
	ENSMUSG00000106067.2	Gm7902	0.205268	-0.364407	0.246782	0.623868	0.854508
	ENSMUSG00000084790.2	Gm15879	0.205156	-0.142994	0.360656	0.55377	0.816662
	ENSMUSG00000031024.14	Denn2b	0.204937	7.20337	17.0494	0.000379866	0.0263384
	ENSMUSG00000028019.10	Pdgfc	0.204894	1.90088	2.39485	0.134818	0.457691
	ENSMUSG00000097504.2	4930516B21Rik	0.204832	2.49093	3.10315	0.090873	0.380684
	ENSMUSG00000003949.17	Hlf	0.204815	4.59091	1.36736	0.253746	0.599973
	ENSMUSG00000078578.10	Ube2d3	0.204671	7.79363	4.78801	0.0386259	0.248438
	ENSMUSG00000052485.8	Tmem171	0.204545	2.26516	1.13158	0.298021	0.640803
	ENSMUSG00000106022.2	Gm42929	0.204483	0.273743	0.877223	0.400985	0.72643
	ENSMUSG00000107163.2	Gm43496	0.204309	-0.314005	0.378954	0.543956	0.811673
	ENSMUSG00000075470.3	Alg10b	0.204098	5.33306	7.86992	0.00980516	0.133618
	ENSMUSG00000028496.18	Mllt3	0.20405	4.74044	12.3159	0.00179942	0.05594
	ENSMUSG00000043795.11	Prr33	0.204041	3.4124	2.45774	0.130035	0.450761
	ENSMUSG00000046093.10	Hpcal4	0.203996	3.39624	1.52865	0.228275	0.573546
	ENSMUSG00000034173.14	Chchd2l	0.203936	1.39184	1.57528	0.221523	0.565519
	ENSMUSG00000025862.15	Stag2	0.203863	6.23877	6.35278	0.0187749	0.177936
	ENSMUSG00000026594.15	Ralgps2	0.203828	4.64124	5.67334	0.0254977	0.206312
	ENSMUSG00000117310.3	ENSMUSG00000117310.3	0.203762	6.75331	6.95256	0.0144466	0.158671
	ENSMUSG00000038481.14	Cdk19	0.203742	6.12859	6.67648	0.0162841	0.168117
	ENSMUSG00000043629.13	1700019D03Rik	0.203737	0.725035	0.683888	0.416395	0.735459
	ENSMUSG00000039883.6	Lrrc17	0.203523	3.48437	3.46081	0.0751338	0.347391
	ENSMUSG00000040370.14	Etfrf1	0.203493	4.22838	7.16631	0.0131809	0.152079
	ENSMUSG00000103115.2	Gm37584	0.203492	-0.036613	0.67767	0.418493	0.737061
	ENSMUSG00000035293.14	G2e3	0.203338	3.73778	6.13394	0.0206971	0.185695
	ENSMUSG00000040006.14	Ginm1	0.203212	5.99372	16.2949	0.000480006	0.0286391
	ENSMUSG00000064339.1	mt-Rnr2	0.203189	7.94685	5.79504	0.0241191	0.201097
	ENSMUSG00000109168.2	Gm44709	0.203189	2.233	0.586062	0.451407	0.758176
	ENSMUSG00000087289.4	4933424M12Rik	0.203128	0.0555012	0.74091	0.404254	0.728721
	ENSMUSG00000097760.3	6030442K20Rik	0.203058	-0.180744	0.459934	0.50414	0.790696
	ENSMUSG00000042268.11	Slc26a9	0.203052	6.09637	5.42291	0.0286189	0.216157
	ENSMUSG00000073154.12	9330158H04Rik	0.202875	1.17725	0.968411	0.334891	0.673278
	ENSMUSG00000026417.14	Pigr	0.202875	7.09017	1.59062	0.219357	0.563141
	ENSMUSG00000029727.8	Cyp3a13	0.20279	2.33504	1.77611	0.195139	0.536494
	ENSMUSG00000056014.16	A430033K04Rik	0.202664	3.01766	2.84306	0.104724	0.408849
	ENSMUSG00000046593.4	Tmem215	0.202482	0.0311966	0.281734	0.600443	0.843656
	ENSMUSG00000078974.11	Sec61g	0.202327	4.43104	5.43056	0.0285175	0.216006
	ENSMUSG00000103649.2	Gm37768	0.202263	0.3102	0.536033	0.471169	0.770618
	ENSMUSG00000046873.19	Mbtps2	0.202256	4.23802	6.78968	0.0155011	0.164542
	ENSMUSG00000029209.16	Gnpda2	0.20225	4.35652	9.9988	0.00420824	0.085617
	ENSMUSG00000007812.17	Zfp655	0.202119	5.20447	17.709	0.000310798	0.0232214
	ENSMUSG00000021236.17	Entpd5	0.202113	5.64491	1.78879	0.193607	0.534842
	ENSMUSG00000044835.16	Ankrd45	0.201876	2.87464	1.45584	0.239349	0.585918
	ENSMUSG00000046605.15	B3gntl1	0.201826	3.11718	2.98507	0.0968804	0.394578
	ENSMUSG00000040022.15	Rab11fip2	0.201785	4.24421	3.51191	0.0731507	0.342238
	ENSMUSG00000115049.2	Gm49172	0.201768	3.3708	4.97823	0.0352677	0.23826
	ENSMUSG00000000901.18	Mmp11	0.20164	5.74261	9.09595	0.00597355	0.104275
	ENSMUSG00000045775.16	Slc16a5	0.201581	-0.151619	0.763866	0.432567	0.744481
	ENSMUSG00000026889.13	Rbm18	0.201486	5.48406	21.1285	0.000115765	0.0131398
	ENSMUSG00000017677.12	Wsb1	0.201324	6.61891	7.48162	0.0115316	0.142573
	ENSMUSG00000035183.15	Slc24a5	0.201145	0.168649	0.695983	0.412361	0.733341
	ENSMUSG00000038172.15	Ttc39b	0.201144	5.12307	10.0492	0.00412818	0.0850202
	ENSMUSG00000023349.15	Clec4n	0.200829	3.83766	1.64704	0.211613	0.554457
	ENSMUSG00000030562.18	Nox4	0.20078	6.22754	7.51613	0.0113653	0.141528
	ENSMUSG00000037475.16	Thoc2	0.200612	5.03879	3.99929	0.0569567	0.306109
	ENSMUSG00000059060.16	Rad51b	0.20056	0.742333	0.688969	0.414694	0.734807
	ENSMUSG00000042045.7	Sln	0.20054	4.42136	0.802139	0.379347	0.708783
	ENSMUSG00000050014.9	Apol10b	0.2005	3.23258	0.726259	0.40252	0.727634
	ENSMUSG00000097081.2	Gm10425	0.200454	2.14556	1.33042	0.260086	0.606447
	ENSMUSG00000075232.7	Amd1	0.200415	6.30003	7.7252	0.0104129	0.136735
	ENSMUSG00000112540.2	Gm47461	0.200316	-0.304067	0.454018	0.506869	0.791966
	ENSMUSG00000051041.9	Olfml1	0.200299	4.3638	5.03474	0.0343341	0.234773
	ENSMUSG00000093553.2	Gm20633	0.20007	1.51637	1.05218	0.315231	0.656599
	ENSMUSG00000045140.9	Pigw	0.200059	2.28636	2.22343	0.148954	0.477878
	ENSMUSG00000037860.16	Aim2	0.199962	3.1317	1.93684	0.176774	0.517888
	ENSMUSG00000029729.13	Zkscan1	0.199949	5.47896	11.2258	0.00266131	0.0679445
	ENSMUSG00000036533.10	Cdc42ep3	0.199852	5.52093	16.0351	0.000520865	0.0295782
	ENSMUSG00000021969.9	Zdhhc20	0.19969	5.6933	6.82624	0.0152573	0.162978
	ENSMUSG00000078451.6	Ppil6	0.199662	2.86896	2.49384	0.127379	0.447699
	ENSMUSG00000067058.8	Rps15a-ps5	0.199579	2.80389	1.66713	0.208939	0.552263
	ENSMUSG00000120777.1	ENSMUSG00000120777.1	0.199429	2.00244	0.513707	0.480454	0.776015
	ENSMUSG00000037286.16	Stag1	0.199395	5.41856	14.09	0.000979122	0.0388103
	ENSMUSG00000032375.16	Aph1b	0.199323	4.30631	5.34219	0.029714	0.21983
	ENSMUSG00000026096.15	Osgepl1	0.19932	3.24099	5.30636	0.0302148	0.221456
	ENSMUSG00000059602.15	Syn3	0.199232	1.51812	0.832579	0.3706	0.702723
	ENSMUSG00000047786.13	Lix1	0.199144	1.16025	1.11372	0.301779	0.64509
	ENSMUSG00000052713.10	Zfp608	0.199093	5.80627	5.7429	0.0246993	0.203101
	ENSMUSG00000045284.10	Dcaf12l1	0.199053	0.0817089	0.750737	0.39482	0.721132
	ENSMUSG00000027550.15	Lrrcc1	0.199018	4.06161	4.43203	0.0459185	0.273617
	ENSMUSG00000037188.8	Grhl3	0.19898	0.41944	0.108282	0.744962	0.907732
	ENSMUSG00000039055.5	Eme1	0.198968	0.229468	0.636944	0.432644	0.744481
	ENSMUSG00000054381.6	Zfp747	0.198762	4.01339	5.78958	0.0241791	0.201218
	ENSMUSG00000098008.2	A930001A20Rik	0.198752	0.173825	0.548572	0.466085	0.76634
	ENSMUSG00000024072.10	Yipf4	0.198574	5.63122	11.0607	0.0028274	0.0706671
	ENSMUSG00000022858.17	Tra2b	0.198508	6.4641	7.66909	0.0106595	0.138406
	ENSMUSG00000120912.1	ENSMUSG00000120912.1	0.198491	0.171384	0.444486	0.511323	0.794627
	ENSMUSG00000030554.17	Synm	0.198199	6.25977	9.7785	0.00457883	0.0901926
	ENSMUSG00000029641.9	ENSMUSG00000029641.9	0.198195	4.58522	4.08901	0.0544418	0.299966
	ENSMUSG00000032293.9	Ireb2	0.198097	5.72983	3.73079	0.065306	0.325478
	ENSMUSG00000007877.3	Tcap	0.198045	4.9879	0.887682	0.355491	0.690353
	ENSMUSG00000046442.5	Ppm1e	0.197969	1.15959	0.628141	0.435801	0.746976
	ENSMUSG00000030905.6	Crym	0.197956	2.23892	1.6729	0.208178	0.551767
	ENSMUSG00000048490.15	Nrip1	0.197833	4.35602	3.24662	0.0841436	0.368024
	ENSMUSG00000060579.14	Fhit	0.197781	0.578365	1.02479	0.321479	0.661871
	ENSMUSG00000054931.9	ENSMUSG00000054931.9	0.197652	1.97689	2.41008	0.133641	0.455725
	ENSMUSG00000051515.12	Fam181b	0.197596	2.23665	1.70781	0.203651	0.546283
	ENSMUSG00000073565.6	Prr16	0.197434	1.80531	1.79356	0.193036	0.534432
	ENSMUSG00000114161.2	Gm48662	0.197352	2.00862	0.584362	0.452057	0.758176
	ENSMUSG00000038530.12	Rgs4	0.19731	4.09447	2.92573	0.100072	0.400426
	ENSMUSG00000038042.12	Ptpdc1	0.197177	4.00619	11.7794	0.00217783	0.0611005
	ENSMUSG00000022130.11	Tgds	0.197063	3.53276	5.22891	0.0313302	0.224691
	ENSMUSG00000029780.15	Nt5c3	0.196899	4.6973	5.22086	0.0314488	0.225355
	ENSMUSG00000024922.3	Ovol1	0.196859	1.58724	0.459648	0.504271	0.790696
	ENSMUSG00000054978.4	Kbtbd13	0.196685	0.933584	0.934025	0.343455	0.679644
	ENSMUSG00000085315.9	A430018G15Rik	0.196635	1.44455	1.39715	0.248778	0.595144
	ENSMUSG00000085957.5	Syna	0.196611	0.551052	0.850643	0.365547	0.699227
	ENSMUSG00000074220.11	Zfp382	0.196563	-0.0204857	0.352456	0.558279	0.818482
	ENSMUSG00000034723.12	Tmx4	0.196494	5.22637	7.8539	0.00987047	0.133788
	ENSMUSG00000005836.11	Gata6	0.19632	5.55378	14.5224	0.000848303	0.0376901
	ENSMUSG00000120373.1	ENSMUSG00000120373.1	0.196297	-0.218372	0.501702	0.485574	0.778914
	ENSMUSG00000078896.12	Zfp965	0.196233	0.357631	0.739	0.398484	0.724418
	ENSMUSG00000083179.4	Gm12693	0.196096	1.88833	1.31948	0.262001	0.608948
	ENSMUSG00000005534.11	Insr	0.196052	6.16788	13.6873	0.00112091	0.0416057
	ENSMUSG00000020620.15	Abca8b	0.196003	4.91533	9.10572	0.00595055	0.104275
	ENSMUSG00000009670.12	Tex11	0.195955	1.41109	0.845413	0.367	0.70051
	ENSMUSG00000028229.12	Rmdn1	0.195921	3.32057	6.22472	0.0198744	0.182946
	ENSMUSG00000056579.19	Tug1	0.195905	6.70701	9.01328	0.00617193	0.106078
	ENSMUSG00000059810.19	Rgs3	0.195811	6.65271	12.4961	0.00168895	0.053718
	ENSMUSG00000028497.13	Hacd4	0.195752	4.38302	9.18722	0.0057626	0.102872
	ENSMUSG00000085793.4	Lin52	0.195665	4.48459	12.1689	0.00189539	0.0567729
	ENSMUSG00000048550.18	Thnsl1	0.195655	3.38217	3.6448	0.0682675	0.332175
	ENSMUSG00000027770.6	Dhx36	0.195601	5.41514	12.3162	0.00179923	0.05594
	ENSMUSG00000041444.15	Arhgap32	0.195526	4.87698	8.7747	0.00678615	0.110556
	ENSMUSG00000020482.5	Ccdc117	0.195525	5.60621	9.73977	0.00464761	0.0910301
	ENSMUSG00000026782.16	Abi2	0.195476	4.41851	5.23192	0.031286	0.22456
	ENSMUSG00000102758.4	Naaladl2	0.195464	1.1115	0.931484	0.3441	0.679962
	ENSMUSG00000024097.12	Srsf7	0.195406	6.52687	8.5867	0.00731746	0.114757
	ENSMUSG00000031278.13	Acsl4	0.195359	6.73538	3.45953	0.0751841	0.347531
	ENSMUSG00000102211.2	Gm37490	0.195203	-0.064444	0.372986	0.54712	0.813568
	ENSMUSG00000074676.3	Foxs1	0.195076	2.43256	1.42737	0.243865	0.59023
	ENSMUSG00000047694.13	Yipf6	0.195022	6.41448	7.07366	0.0137139	0.154261
	ENSMUSG00000025059.17	Gk	0.194983	3.70432	5.21628	0.0315164	0.22556
	ENSMUSG00000042766.18	Trim46	0.194939	3.23191	1.97571	0.172653	0.51176
	ENSMUSG00000036298.11	Slc2a13	0.19485	2.80955	2.61404	0.118988	0.434309
	ENSMUSG00000020182.17	Ddc	0.194735	1.6919	0.758863	0.392313	0.719515
	ENSMUSG00000057716.8	Tmem178b	0.194709	-0.0715662	0.397295	0.534444	0.807342
	ENSMUSG00000038319.15	Kcnh2	0.194564	4.23855	3.07516	0.092257	0.384183
	ENSMUSG00000050737.14	Ptges	0.194528	5.78402	3.06756	0.0926372	0.385035
	ENSMUSG00000020070.19	Rufy2	0.194483	4.42571	5.66445	0.0256017	0.206602
	ENSMUSG00000027739.10	Rab33b	0.194418	5.18903	10.1621	0.00395479	0.0834278
	ENSMUSG00000024378.10	Stard4	0.194409	5.329	2.60142	0.119838	0.435669
	ENSMUSG00000029208.17	Guf1	0.194349	4.67084	10.2346	0.00384761	0.0827071
	ENSMUSG00000066607.6	Insyn1	0.194306	3.81791	2.96895	0.0977355	0.395998
	ENSMUSG00000011463.6	Cpb1	0.194191	0.538796	0.611277	0.441951	0.751572
	ENSMUSG00000030996.9	Art1	0.194136	1.81113	0.526903	0.47493	0.773131
	ENSMUSG00000074863.6	Platr25	0.193978	3.17447	4.84053	0.0376642	0.245381
	ENSMUSG00000055003.15	Lrtm2	0.193949	4.73562	3.90004	0.0598933	0.313369
	ENSMUSG00000090069.4	E430024P14Rik	0.193947	1.46833	1.04601	0.316623	0.657838
	ENSMUSG00000022811.18	Zfp148	0.193849	5.61973	9.21717	0.00569517	0.102697
	ENSMUSG00000095478.3	Gm9824	0.193816	1.13533	1.25774	0.273173	0.618475
	ENSMUSG00000030560.18	Ctsc	0.193784	8.27967	6.88032	0.0149042	0.160916
	ENSMUSG00000060510.15	Zfp266	0.193782	5.42005	8.5295	0.00748806	0.116481
	ENSMUSG00000023755.11	Rhebl1	0.193746	2.11494	1.78363	0.19423	0.535684
	ENSMUSG00000028563.17	Tm2d1	0.193618	3.96166	7.27086	0.0126069	0.150061
	ENSMUSG00000020435.18	Osbp2	0.193588	0.603517	0.884944	0.356221	0.690687
	ENSMUSG00000041225.17	Arhgap12	0.19358	5.16168	10.6613	0.00327789	0.0753761
	ENSMUSG00000021180.10	Rps6ka5	0.193518	3.27797	2.96583	0.0979024	0.396021
	ENSMUSG00000034401.17	Spata6	0.193375	4.95762	9.38547	0.005332	0.0995958
	ENSMUSG00000047712.9	Ust	0.193332	3.54936	7.04902	0.0138596	0.155302
	ENSMUSG00000031220.15	Awat2	0.193271	-0.203677	0.527246	0.474787	0.772984
	ENSMUSG00000062116.11	Zfp954	0.19301	3.6636	9.35917	0.00538704	0.100176
	ENSMUSG00000032009.9	Sesn3	0.19299	5.35809	14.1779	0.000950845	0.0384395
	ENSMUSG00000109909.2	Gm45663	0.192965	0.214124	0.578642	0.454252	0.759071
	ENSMUSG00000073413.10	Ly6g6d	0.192834	1.6913	1.77323	0.19549	0.536662
	ENSMUSG00000037754.14	Ppp1r16b	0.192818	7.02962	11.1877	0.00269876	0.0684924
	ENSMUSG00000024431.16	Nr3c1	0.192791	7.1258	17.27	0.000355067	0.0253281
	ENSMUSG00000026610.14	Esrrg	0.192776	1.33571	1.24725	0.275132	0.62052
	ENSMUSG00000024056.11	Ndc80	0.192753	1.43336	0.514638	0.480061	0.775596
	ENSMUSG00000085311.2	Gm15445	0.192629	0.184999	0.581917	0.452993	0.758371
	ENSMUSG00000062082.17	Cd200r4	0.192583	2.05704	1.05803	0.313918	0.655415
	ENSMUSG00000074807.4	Gm10762	0.19246	1.62649	1.30751	0.26412	0.61076
	ENSMUSG00000078117.3	Gm16485	0.19245	0.654303	0.476153	0.496787	0.786142
	ENSMUSG00000049950.7	Rpp38	0.192394	1.88905	1.60319	0.217601	0.560877
	ENSMUSG00000096221.4	1500002C15Rik	0.192275	2.18819	1.32661	0.260751	0.607262
	ENSMUSG00000029335.6	Bmp3	0.192239	6.26426	7.42652	0.0118026	0.14438
	ENSMUSG00000027104.19	Atf2	0.192168	5.61548	16.4585	0.000456066	0.0281453
	ENSMUSG00000003929.12	Zfp81	0.192148	3.38737	5.31841	0.0300454	0.220775
	ENSMUSG00000027122.16	Arl14ep	0.192144	4.47846	9.9494	0.0042884	0.0866377
	ENSMUSG00000097042.3	Gm17491	0.191981	3.76514	3.47938	0.0744059	0.345778
	ENSMUSG00000022205.16	Sub1	0.191888	6.07735	9.83216	0.00448539	0.0894704
	ENSMUSG00000035958.4	Tdp2	0.191855	4.02284	7.97736	0.00937924	0.131007
	ENSMUSG00000040713.13	Creg1	0.191836	6.95491	4.47104	0.0450483	0.271392
	ENSMUSG00000036093.8	Arl5a	0.191446	6.82045	10.3662	0.00366111	0.0798657
	ENSMUSG00000069255.14	Dusp22	0.191397	4.675	9.66849	0.00477715	0.0924187
	ENSMUSG00000018861.9	Fdxr	0.191375	3.12235	4.18089	0.0519956	0.292368
	ENSMUSG00000039109.18	F13a1	0.191352	4.55594	2.17478	0.153284	0.484241
	ENSMUSG00000025742.6	Prps2	0.191331	6.20137	8.67126	0.00707302	0.113002
	ENSMUSG00000061175.13	Fnip2	0.191217	4.75265	7.29566	0.0124748	0.149736
	ENSMUSG00000026107.12	Nabp1	0.191183	4.8617	5.49706	0.0276526	0.213924
	ENSMUSG00000024347.17	Psd2	0.191103	0.512534	0.65804	0.425222	0.740668
	ENSMUSG00000049672.16	Zbtb14	0.191026	5.12139	6.81324	0.0153435	0.163368
	ENSMUSG00000028238.7	Atp6v0d2	0.191014	5.06839	3.19472	0.0865096	0.372441
	ENSMUSG00000027692.17	Tnik	0.190913	4.5808	9.75576	0.00461908	0.090779
	ENSMUSG00000078566.9	Bnip3	0.190866	5.51956	5.05421	0.0340188	0.233723
	ENSMUSG00000036019.9	Tmtc2	0.190842	5.64517	5.49766	0.0276449	0.213924
	ENSMUSG00000021302.11	Ggps1	0.190826	5.57427	17.0683	0.000377672	0.0262914
	ENSMUSG00000099647.2	Gm5776	0.1908	1.43324	0.648693	0.428486	0.742366
	ENSMUSG00000024806.5	Mlana	0.190725	0.550366	0.651228	0.427597	0.741939
	ENSMUSG00000056019.13	Zfp709	0.190664	2.84233	1.98797	0.171378	0.510599
	ENSMUSG00000055447.20	Cd47	0.190603	7.86479	14.3317	0.000903496	0.037829
	ENSMUSG00000079555.3	Haus3	0.190452	3.3359	2.28028	0.144079	0.472378
	ENSMUSG00000000861.16	Bcl11a	0.190406	2.20089	0.946143	0.340402	0.677959
	ENSMUSG00000039005.14	Tlr4	0.190338	4.05377	6.37526	0.018589	0.177666
	ENSMUSG00000101589.2	Rbm6-ps1	0.190323	0.923444	0.887867	0.355442	0.690335
	ENSMUSG00000002731.7	Prkra	0.190148	3.89387	9.56355	0.00497514	0.0948724
	ENSMUSG00000084799.9	Ino80dos	0.190089	2.04382	1.85395	0.185967	0.528389
	ENSMUSG00000025993.11	Slc40a1	0.189984	3.76927	2.32683	0.140227	0.466546
	ENSMUSG00000041559.8	Fmod	0.189965	4.81946	0.767664	0.389624	0.717452
	ENSMUSG00000106641.2	Gm43534	0.18988	0.00211248	0.671853	0.42047	0.737684
	ENSMUSG00000020738.17	Sumo2	0.189872	6.89559	9.60917	0.00488798	0.0941023
	ENSMUSG00000059049.15	Frem1	0.189813	3.78758	1.5052	0.23177	0.57673
	ENSMUSG00000078870.10	Gm14410	0.189688	2.2568	1.28768	0.26768	0.61347
	ENSMUSG00000055737.13	Ghr	0.189684	6.59298	7.0934	0.0135984	0.153585
	ENSMUSG00000108414.3	Snhg1	0.18968	4.01617	1.98992	0.171177	0.510289
	ENSMUSG00000021951.8	Eef1akmt1	0.189476	3.14243	3.89662	0.0599973	0.313629
	ENSMUSG00000043991.6	Pura	0.189446	5.09331	5.73744	0.0247609	0.203318
	ENSMUSG00000034579.18	Pla2g3	0.189342	0.531634	0.42294	0.521649	0.799861
	ENSMUSG00000052949.15	Rnf157	0.189336	2.69331	2.26454	0.14541	0.474319
	ENSMUSG00000039763.11	Dnajc28	0.189316	2.98603	2.41772	0.133054	0.454557
	ENSMUSG00000035595.7	Fam174c	0.189312	2.5126	3.62754	0.0688804	0.333549
	ENSMUSG00000000708.15	Kat2b	0.189209	6.221	16.6252	0.000433019	0.0275954
	ENSMUSG00000058581.8	Gm5801	0.18914	1.7109	1.19171	0.285819	0.630057
	ENSMUSG00000022297.16	Fzd6	0.189128	5.43685	5.47743	0.0279048	0.214979
	ENSMUSG00000042105.19	Inpp5f	0.189114	4.87621	9.23464	0.00565624	0.102451
	ENSMUSG00000112280.2	A830082N09Rik	0.1891	0.83734	0.88301	0.356738	0.691073
	ENSMUSG00000025950.17	Idh1	0.188791	6.3818	6.1066	0.0209521	0.187011
	ENSMUSG00000034472.14	Rasd2	0.188721	2.85362	2.22693	0.148648	0.477635
	ENSMUSG00000026643.17	Nmt2	0.188681	5.21551	14.8005	0.000774318	0.0361466
	ENSMUSG00000085272.8	Sbk3	0.188622	3.92517	0.529356	0.473914	0.772288
	ENSMUSG00000030145.15	Zfp248	0.188566	2.69884	2.94985	0.0987601	0.398144
	ENSMUSG00000121179.1	ENSMUSG00000121179.1	0.188532	4.12744	0.669644	0.421224	0.73806
	ENSMUSG00000040651.10	Tasor	0.188528	5.79218	8.93162	0.00637502	0.107459
	ENSMUSG00000103436.2	Gm36995	0.188522	2.45107	1.31496	0.2628	0.609497
	ENSMUSG00000113555.2	Gm10095	0.188452	4.85008	5.27515	0.0306589	0.222975
	ENSMUSG00000037904.15	Ankrd9	0.18844	2.1901	1.72365	0.201636	0.544201
	ENSMUSG00000045273.9	Cenph	0.188379	0.092277	0.423011	0.521615	0.799861
	ENSMUSG00000022940.18	Pigp	0.1882	4.53758	10.1104	0.00403307	0.084228
	ENSMUSG00000068479.6	Mfap1a	0.188198	6.03517	2.11091	0.159199	0.494698
	ENSMUSG00000037894.14	H2az1	0.188198	6.53337	12.5624	0.00165018	0.0528929
	ENSMUSG00000028232.14	Tmem68	0.188147	4.0876	4.29755	0.0490667	0.282659
	ENSMUSG00000020679.12	Hnf1b	0.188147	4.48801	4.96971	0.035411	0.238375
	ENSMUSG00000085442.2	Gm3362	0.188067	1.6389	0.97557	0.333146	0.672097
	ENSMUSG00000085241.8	Snhg3	0.188045	2.60316	1.73824	0.199802	0.542569
	ENSMUSG00000059890.17	Ube4a	0.188014	5.81436	19.6922	0.000173491	0.0168949
[truncated: 15,335 more rows]

## Sheet: c DEGs  BA5+MPvsBA5 6dpi
	Ensembl_ID	HUGO_ID	logFC	logCPM	F	PValue	FDR	M1 BA.5+MP	M2 BA.5+MP	M3 BA.5+MP	M4 BA.5+MP	M5 BA.5+MP	M6 BA.5+MP	M1 BA.5-MP	M2 BA.5-MP	M3 BA.5-MP	M4 BA.5-MP	M5 BA.5-MP	M6 BA.5-MP
DEGs for BA.5+MP vs. BA.5 6 dpi. Significant differentially expressed genes (EdgeR, FDR<0.05) from b. Viral read count was included as a term in the linear model for EdgeR analysis.	ENSMUSG00000090877.4	Hspa1b	2.64113	7.98683	25.3938	3.76049e-05	0.00702793	153.9	101.888	664.783	137.928	902.408	681.645	54.8654	61.7738	73.4583	70.3911	99.4572	63.4555
	ENSMUSG00000091971.4	Hspa1a	2.46043	7.63966	19.5285	0.000181843	0.0173191	94.026	61.3108	510.134	90.3207	690.325	583.841	56.2813	56.56	73.6807	55.9066	80.4046	45.7763
	ENSMUSG00000029371.8	Cxcl5	2.28324	1.21666	15.6759	0.000583712	0.031266	1.22486	1.8417	0.485302	0.349538	7.18559	2.70924	0.424765	0.527981	0.81538	0.529921	0.213275	0.315699
	ENSMUSG00000023034.8	Nr4a1	1.76624	7.61326	49.6936	2.74007e-07	0.000296852	134.735	181.853	324.991	240.343	353.037	372.995	61.0245	88.4368	139.949	49.2826	68.1769	65.3496
	ENSMUSG00000028195.5	Ccn1	1.33061	8.35613	21.2647	0.000111489	0.0131102	234.741	210.845	537.472	305.497	576.952	521.597	98.7578	206.441	249.877	84.8756	181.284	126.911
	ENSMUSG00000054988.10	Agtr1b	1.09947	-0.214131	14.2431	0.000930461	0.038184	0.504354	0.950554	1.05149	1.11852	1.23389	1.01597	0.637147	0.857969	0.222376	0.4416	0.355458	0.189419
	ENSMUSG00000106073.2	Gm42892	1.09796	-0.307178	16.522	0.000447139	0.0280823	0.792557	0.475277	1.29414	0.838892	0.725817	0.745041	0.495559	0.263991	0.370627	0.35328	0.355458	0.378839
	ENSMUSG00000029380.12	Cxcl1	1.09272	0.894836	13.7828	0.00108538	0.040989	1.36896	2.37639	1.37502	0.978708	1.08873	1.69328	0.353971	0.725974	0.667129	1.14816	0.782008	0.568258
	ENSMUSG00000033730.5	Egr3	1.07133	3.14806	31.2988	9.29732e-06	0.00328897	7.85352	7.54503	11.6473	11.2551	16.2583	11.1756	3.96447	6.59976	5.63354	4.50432	4.2655	6.06142
	ENSMUSG00000101122.2	Gm17971	1.05273	0.00638031	13.7323	0.001104	0.0412671	1.29691	1.66347	0.889721	1.39815	1.23389	0.67731	0.424765	0.527981	0.296502	0.971521	0.639825	0.631398
	ENSMUSG00000087502.2	Gm16091	1.0179	1.04637	26.2945	3.00524e-05	0.00627624	2.66587	2.13875	3.15446	1.67778	3.41134	2.37059	1.34509	1.84793	1.40838	1.05984	0.924191	0.947096
	ENSMUSG00000085314.2	Gm14866	0.9589	-0.22918	15.1213	0.000857183	0.0376901	0.792557	0.950554	0.889721	0.629169	0.87098	0.745041	0.353971	0.461983	0.593004	0.17664	0.355458	0.505118
	ENSMUSG00000026628.14	Atf3	0.94462	5.19492	55.3601	1.1092e-07	0.000153849	27.5954	33.8041	36.0741	36.352	42.17	42.6705	21.5214	19.6673	18.9761	17.664	21.3986	14.3959
	ENSMUSG00000003665.8	Has1	0.932262	1.84366	13.2198	0.00131418	0.0451091	1.72921	4.57454	2.42651	3.6352	3.48392	2.43832	2.05303	1.18796	2.37202	1.50144	1.42183	1.13652
	ENSMUSG00000055148.8	Klf2	0.891893	7.93599	88.5047	1.59306e-09	9.20471e-06	245.404	277.502	336.395	289.628	353.763	283.048	172.454	157.668	155.367	179.996	161.165	135.877
	ENSMUSG00000041695.3	Kcnj2	0.868652	4.53559	31.4092	9.07135e-06	0.00327589	19.2375	39.5668	25.8019	40.7562	26.8552	27.2279	13.5217	15.9054	12.972	17.3107	17.7729	20.8993
	ENSMUSG00000044288.7	Cnr1	0.828664	1.92783	31.5062	8.87754e-06	0.00327589	3.38638	3.86163	4.77214	4.96345	4.3549	4.19932	2.19462	1.97993	2.81677	2.03136	2.70148	2.58873
	ENSMUSG00000073427.5	Gm4924	0.799003	1.63553	21.492	0.000104729	0.0126595	3.45843	3.6834	3.72065	3.84492	3.48392	4.06386	1.48668	2.7059	2.22376	1.94304	1.63511	2.71501
	ENSMUSG00000026475.8	Rgs16	0.785723	1.52188	16.65	0.000429697	0.0275866	2.23357	3.14871	2.58828	2.51668	2.54036	4.60571	1.2035	1.58394	1.92726	1.85472	1.99057	1.70477
	ENSMUSG00000047146.18	Tet1	0.785553	2.42461	15.8478	0.000552665	0.0302205	7.06096	4.39631	6.956	7.13058	7.76624	9.34688	3.04415	3.76187	2.96502	3.5328	4.97641	6.25084
	ENSMUSG00000063632.7	Sox11	0.769945	4.66269	28.031	1.97358e-05	0.00485929	29.973	33.3882	32.8388	34.7441	28.5246	32.0368	12.4598	16.8954	14.3062	21.0202	18.9104	28.5392
	ENSMUSG00000032487.9	Ptgs2	0.753957	3.98908	29.0862	1.53957e-05	0.00435572	17.2201	24.358	18.3606	12.4436	15.7502	13.6139	11.0439	11.4836	8.67268	9.09697	10.095	9.91294
	ENSMUSG00000026826.14	Nr4a2	0.746324	3.8047	29.9714	1.25498e-05	0.00389328	13.1132	14.9118	18.6841	15.3797	21.7019	18.8292	14.2296	9.10767	8.82093	7.59553	11.0192	10.1024
	ENSMUSG00000039377.8	Hlx	0.727266	5.33073	52.5839	1.71283e-07	0.000201917	43.9509	51.1517	54.273	55.6465	48.6297	52.6947	24.8487	24.8811	34.5425	32.4135	30.3561	38.0101
	ENSMUSG00000074570.15	Cass4	0.717024	4.08828	65.5878	2.53326e-08	4.87907e-05	22.9121	17.11	22.0004	23.4191	20.7584	19.7775	13.3093	12.8695	14.4545	13.8663	11.4458	10.7338
	ENSMUSG00000027938.12	Creb3l4	0.712683	1.39942	18.788	0.00022549	0.0196415	3.96278	2.85166	2.34563	2.86622	2.97585	4.13159	1.55747	2.30992	2.52027	1.50144	1.84838	1.89419
	ENSMUSG00000047330.9	Kcne4	0.705768	4.04804	25.6582	3.51947e-05	0.00693255	16.3555	22.4568	20.7871	15.7292	20.5406	18.4906	11.6102	13.0675	13.565	10.1568	10.5216	11.1126
	ENSMUSG00000035678.9	Tnfsf9	0.670257	2.58868	13.9133	0.00103878	0.0400983	5.9802	9.26791	5.74274	6.3616	6.31461	5.8926	4.38923	5.21381	3.33565	3.35616	3.76786	4.73548
	ENSMUSG00000069743.6	Zfp820	0.653669	2.26037	14.3662	0.000893229	0.0377484	4.10688	6.05978	6.14716	4.26437	5.66137	6.02806	3.68129	4.28985	2.07551	2.6496	2.63039	4.98804
	ENSMUSG00000015627.6	Gata5	0.653147	4.30605	13.3534	0.00125551	0.0444996	26.8028	31.8436	20.868	27.6834	13.9357	18.4228	15.2207	12.0116	22.9048	13.1597	11.0192	14.7116
	ENSMUSG00000024042.8	Sik1	0.637325	7.06896	74.7959	7.71098e-09	1.90946e-05	142.228	179.655	173.415	162.885	177.825	141.355	119.5	110.612	93.4722	102.098	101.874	100.708
	ENSMUSG00000026819.16	Slc25a25	0.625412	5.61784	82.5596	3.07776e-09	1.33375e-05	45.6801	52.1023	55.3245	55.6465	67.1381	59.6033	35.1847	36.2987	36.025	37.4477	38.4606	34.0955
	ENSMUSG00000104548.2	Gm43857	0.61757	2.71506	19.2232	0.000198611	0.0183124	8.35787	6.71329	7.60307	8.45883	6.31461	8.19545	4.74321	6.00578	3.7804	3.5328	5.1186	6.31398
	ENSMUSG00000028681.12	Ptch2	0.616705	2.98613	17.3719	0.000344218	0.0248611	9.79888	8.85204	9.9487	7.41021	7.98399	11.4465	5.59273	5.5438	6.22654	5.21088	5.40296	8.01875
	ENSMUSG00000029135.11	Fosl2	0.614426	6.48796	119.398	8.43811e-11	1.46266e-06	88.1179	109.551	96.656	95.8434	100.526	102.274	67.3252	63.6877	58.8556	61.8241	71.0916	64.5288
	ENSMUSG00000020423.7	Btg2	0.581444	7.97803	14.5705	0.000834979	0.0375164	197.275	222.549	339.065	252.227	384.756	329.105	183.852	242.805	222.451	146.788	203.109	153.177
	ENSMUSG00000021701.9	Plk2	0.575094	6.46642	28.2735	1.86325e-05	0.00468081	101.447	83.2923	113.318	120.101	107.058	105.796	56.1397	55.966	68.0472	72.7757	80.689	89.6585
	ENSMUSG00000111933.2	Gm36660	0.574472	1.13419	14.569	0.000835387	0.0375164	2.23357	1.66347	2.5074	2.30695	2.17745	3.18336	1.76985	1.45195	1.18601	1.50144	1.77729	1.70477
	ENSMUSG00000024986.13	Hhex	0.568587	4.59354	40.3162	1.44995e-06	0.000837781	30.1892	24.4174	33.405	32.0177	28.452	26.1442	19.7516	18.3473	18.1607	18.2823	21.2564	21.5938
	ENSMUSG00000108456.2	4732496C06Rik	0.563683	2.8172	20.9494	0.000121663	0.0136058	8.28582	8.49558	8.25014	9.29772	7.04042	7.31495	5.02638	5.34581	5.11466	4.15104	6.11388	7.00851
	ENSMUSG00000069727.6	Zfp975	0.556866	3.29195	49.0297	3.06048e-07	0.000312061	10.5194	11.3472	12.1326	11.1852	10.7421	10.566	7.29179	7.98571	6.59717	7.15393	8.17554	7.89247
	ENSMUSG00000078202.4	Nrarp	0.540876	5.78697	25.3864	3.76752e-05	0.00702793	52.4528	87.451	55.7289	65.3637	54.8718	65.3604	39.2199	42.7005	36.618	45.3082	40.0957	58.278
	ENSMUSG00000113019.3	Gm47467	0.537596	1.91214	14.5133	0.00085086	0.0376901	5.47585	4.57454	5.90451	4.96345	3.70167	3.52201	3.53971	3.82786	3.1874	2.47296	3.19912	3.03071
	ENSMUSG00000015619.11	Gata3	0.535123	3.9025	35.0582	4.1342e-06	0.00198139	19.7419	15.9218	20.5445	19.714	20.9761	16.9328	12.389	14.1895	13.8615	12.0115	14.3605	11.5546
	ENSMUSG00000024136.15	Dnase1l2	0.534379	2.43299	16.4344	0.000459509	0.0281453	5.33174	7.48562	5.58098	6.43151	6.24203	6.23125	5.66353	4.68583	3.63215	4.68096	3.83895	3.34641
	ENSMUSG00000062743.10	Zfp677	0.530974	2.56937	29.0352	1.55795e-05	0.00435572	6.05225	6.47565	8.00749	6.43151	5.87912	6.36672	3.89368	4.42184	4.44753	4.15104	5.33187	4.79862
	ENSMUSG00000096696.2	Zfp960	0.521542	2.63677	14.4687	0.000863477	0.0376901	7.06096	7.30739	7.03688	7.20049	6.09686	8.19545	5.30956	5.6098	3.63215	3.70944	5.18969	6.25084
	ENSMUSG00000025981.14	Coq10b	0.521119	5.20487	24.18	5.12262e-05	0.00807232	27.019	38.0222	41.9786	41.5252	42.0248	41.2482	27.3265	29.7649	23.4236	20.0487	28.4367	31.8856
	ENSMUSG00000017418.15	Arl5b	0.51157	5.27337	40.9243	1.29188e-06	0.000837781	38.1148	40.2203	46.1037	43.8321	45.8716	44.7025	27.2557	28.973	24.7579	27.9975	34.1951	37.947
	ENSMUSG00000020275.10	Rel	0.511334	4.67107	35.2661	3.95932e-06	0.00196088	29.8289	26.4967	25.721	26.6348	24.8229	31.4272	17.2738	21.7792	15.344	18.1939	21.8962	21.0255
	ENSMUSG00000022144.5	Gdnf	0.508858	3.54692	19.9783	0.000159875	0.0162063	13.6176	13.6642	13.9929	13.4922	14.3712	11.1756	10.9731	10.9556	9.63631	7.41889	7.82008	9.40782
	ENSMUSG00000045404.17	Kcnk13	0.508408	2.36824	19.7657	0.000169877	0.0167309	4.89944	5.04982	4.93391	6.15188	7.04042	6.70537	4.17685	3.82786	4.0769	3.9744	4.40768	3.9778
	ENSMUSG00000100005.9	B130024G19Rik	0.503913	3.63827	41.9526	1.06551e-06	0.000803025	16.8598	12.8325	14.5591	14.5408	14.2986	14.1558	8.77847	10.0976	11.4153	10.5984	9.52628	11.0495
	ENSMUSG00000056260.16	Lrif1	0.498958	4.36504	22.9373	7.09098e-05	0.00967835	24.4252	22.8133	24.4269	22.4404	23.4439	20.9289	16.7074	17.5554	12.972	11.3933	16.1378	22.5409
	ENSMUSG00000073792.12	Alg6	0.498327	3.3349	25.775	3.41835e-05	0.00688996	12.3927	9.38672	12.7796	11.2551	12.3389	11.9207	7.43338	7.91972	6.59717	7.41889	9.73955	10.2286
	ENSMUSG00000053347.16	Zfp943	0.490518	4.36244	16.4135	0.00046252	0.02823	20.2462	24.9521	25.2357	20.7626	23.5891	21.0643	15.5039	16.4334	12.3048	12.9831	14.7871	24.1194
	ENSMUSG00000044636.7	Csrnp2	0.488048	3.13106	27.914	2.02934e-05	0.00485929	9.94298	8.85204	11.4855	11.1153	9.58078	10.0919	7.29179	6.73176	6.30066	7.68385	7.89117	7.57677
	ENSMUSG00000038253.7	Hoxa5	0.485639	5.29587	27.7657	2.1025e-05	0.00485929	43.9509	50.0229	41.008	43.133	42.17	44.2284	29.6627	25.8051	31.0586	30.5587	31.067	40.7251
	ENSMUSG00000022358.8	Fbxo32	0.483555	4.53183	16.2897	0.000480788	0.0286391	30.1892	23.4074	31.7873	17.6866	30.8472	25.3991	20.1763	17.8854	19.8656	19.0771	19.4791	17.3003
	ENSMUSG00000032064.18	Dixdc1	0.478501	4.86527	22.9619	7.04485e-05	0.00967835	36.0253	36.0617	41.8978	32.4372	35.6376	29.2598	29.5211	26.531	19.0502	21.9034	24.2422	29.8651
	ENSMUSG00000021127.8	Zfp36l1	0.475333	8.38296	30.4404	1.1278e-05	0.0038123	348.437	406.956	399.404	386.1	367.844	393.111	223.143	256.995	292.87	239.436	279.888	362.99
	ENSMUSG00000120995.1	Gm51425	0.472408	2.70001	16.3225	0.000475874	0.0285426	7.85352	7.72325	7.60307	7.48012	6.38719	7.58587	4.814	6.59976	4.0769	5.56417	5.1186	5.93514
	ENSMUSG00000019256.18	Ahr	0.471129	6.24212	17.0146	0.000383953	0.0264105	93.3776	72.8362	97.7884	77.5975	86.4448	91.5723	53.0248	55.042	50.2571	57.673	63.0583	95.0253
	ENSMUSG00000036144.7	Meox2	0.470251	4.54194	40.5112	1.39708e-06	0.000837781	30.4774	27.8037	28.1475	27.264	30.1214	22.6899	16.9906	19.9313	20.7551	21.7267	20.6166	20.2047
	ENSMUSG00000031327.11	Chic1	0.467922	2.76824	14.6982	0.000800681	0.0368143	6.62866	8.07971	8.33102	6.64123	7.62108	6.97629	4.24765	5.14782	5.04053	4.76928	5.40296	7.26107
	ENSMUSG00000071291.11	Zfp58	0.464053	3.17922	18.9028	0.000218038	0.0191851	10.0871	10.9314	9.38251	10.626	9.00013	9.6178	7.221	8.18371	6.15241	5.12256	8.67318	7.70305
	ENSMUSG00000051147.11	Nat2	0.462663	2.71319	16.4798	0.000453053	0.0281453	7.42121	7.01034	7.03688	6.99077	6.82268	6.7731	5.16797	6.59976	3.85452	4.68096	4.2655	5.80886
	ENSMUSG00000032531.16	Amotl2	0.461696	8.1359	31.4264	9.03663e-06	0.00327589	279.34	234.846	365.918	294.661	359.57	367.305	216.276	225.118	233.421	216.031	242.209	247.318
	ENSMUSG00000055200.8	Sertad3	0.458473	3.6511	33.3962	5.87529e-06	0.00242482	11.5281	12.7731	13.4267	15.2399	14.9518	13.5462	8.70768	9.63565	10.2293	9.53857	9.313	11.744
	ENSMUSG00000020105.10	Lrig3	0.458101	3.87791	25.6801	3.50022e-05	0.00693255	15.3468	14.496	21.0298	14.1913	17.347	17.881	11.4686	12.1436	13.1943	12.3648	11.2325	12.4385
	ENSMUSG00000035840.8	Lysmd3	0.457423	4.12274	15.3662	0.000644552	0.0325937	18.0847	18.7734	22.8901	15.7991	20.6858	17.8133	13.3093	14.6515	9.41393	12.0999	15.498	17.616
	ENSMUSG00000069206.15	Zfp874a	0.456676	3.83835	30.2951	1.16564e-05	0.0038123	16.2834	19.1299	16.5003	16.7778	14.5889	13.0721	11.8934	12.5396	10.7482	11.305	10.5927	13.0699
	ENSMUSG00000078994.10	Zfp429	0.456557	3.00518	24.0717	5.26786e-05	0.00821729	10.3032	8.43617	8.65456	7.89957	8.92755	8.26318	5.45115	7.32574	6.67129	5.21088	6.54043	6.88223
	ENSMUSG00000087403.10	Kantr	0.455279	2.94831	16.9089	0.000396638	0.0270396	9.22248	8.13912	10.1105	6.99077	9.07271	8.53411	6.22988	5.34581	5.26291	5.74081	6.54043	8.65015
	ENSMUSG00000033972.10	Zfp944	0.452233	3.44566	17.877	0.000295477	0.022366	9.72683	12.3572	13.8311	13.0028	11.5405	11.5143	8.14132	10.8236	6.07829	7.33057	9.313	10.6075
	ENSMUSG00000024427.8	Spry4	0.450462	5.4887	16.0565	0.000517357	0.0295782	38.8353	39.8045	49.4199	44.7409	59.1541	58.6551	32.9901	30.0289	33.4306	30.3821	37.252	47.9862
	ENSMUSG00000059708.13	Akap17b	0.450245	2.37803	19.3986	0.000188782	0.0177699	5.90815	6.41624	5.98539	6.22178	5.00814	4.74117	4.60162	3.82786	3.33565	4.06272	4.62096	4.6092
	ENSMUSG00000045875.14	Adra1a	0.447559	4.03531	18.7479	0.000228158	0.0197745	21.327	20.6746	18.9268	17.7566	20.8309	16.1877	12.6014	12.3416	17.3454	13.513	13.3652	15.6587
	ENSMUSG00000046667.15	Rbm12b1	0.439765	3.88179	34.9492	4.22934e-06	0.00198139	17.148	15.9218	17.5518	17.0575	17.5648	18.3551	12.389	13.5955	11.7859	11.04	14.2183	13.1331
	ENSMUSG00000092203.9	1110038B12Rik	0.43601	3.21844	17.1828	0.000364649	0.0257993	8.28582	12.8919	10.9193	8.94818	10.9598	12.1916	7.15021	7.12774	7.70905	8.56705	8.74427	8.27131
	ENSMUSG00000006586.16	Runx1t1	0.431291	2.69854	14.3085	0.000910465	0.0378938	7.99762	7.72325	9.13986	6.22178	8.34689	6.90856	5.30956	5.21381	4.74403	6.35905	5.33187	7.32421
	ENSMUSG00000043099.6	Hic1	0.429133	4.92496	15.6722	0.000584412	0.031266	33.4315	38.0816	30.7358	37.9599	30.4843	35.2879	19.61	24.3531	26.1663	26.1427	22.0384	34.6637
	ENSMUSG00000036832.6	Lpar3	0.426735	4.58253	15.435	0.000630466	0.0323328	27.8115	27.9225	30.7358	25.8658	23.8068	22.5544	24.9903	19.9973	18.6796	16.7808	18.2705	19.0682
	ENSMUSG00000050921.13	P2ry10	0.425964	3.32502	13.1726	0.00133567	0.0456655	13.1853	10.0402	12.3752	10.9755	10.8147	12.1239	9.84038	10.8896	7.41255	6.71233	8.531	8.08189
	ENSMUSG00000107134.2	Gm42528	0.425728	3.54317	13.3994	0.00123593	0.0441725	13.6176	10.9314	12.1326	11.9542	12.7018	12.327	9.34482	9.37166	6.67129	7.68385	9.313	12.1228
	ENSMUSG00000052137.12	Rbm12b2	0.424511	4.61972	41.623	1.13299e-06	0.000818302	23.9208	28.6949	27.0152	29.2913	28.5246	27.2956	20.6719	20.5253	19.3467	18.1939	20.1189	23.6774
	ENSMUSG00000046688.15	Tifa	0.423369	3.70234	16.0874	0.000512349	0.0294943	14.194	10.8126	11.9708	10.1366	10.7421	14.359	8.21212	9.96564	9.11743	8.47873	8.67318	9.28154
	ENSMUSG00000020650.16	Bcap29	0.422572	4.35846	22.5209	7.92369e-05	0.0104847	22.768	23.5262	25.3166	21.951	22.5729	24.3154	15.5747	19.8653	16.4559	13.9546	16.4933	21.9726
	ENSMUSG00000041633.15	Kctd12b	0.421857	4.3188	16.7217	0.000420253	0.0273141	23.2723	18.714	23.618	23.0695	24.5326	22.6899	15.1499	17.0934	14.0838	14.3962	16.2089	23.93
	ENSMUSG00000045294.12	Insig1	0.421703	6.62554	28.4559	1.78462e-05	0.00454921	121.621	91.7285	112.833	106.33	120.413	137.9	89.2006	86.0609	80.1296	74.7188	89.9309	95.2148
	ENSMUSG00000074158.10	Zfp976	0.421275	3.4455	14.88	0.00075447	0.0358483	10.3032	11.8819	12.6179	11.8144	14.5889	12.598	7.57497	9.89965	6.81954	8.83201	11.0192	10.7969
	ENSMUSG00000112964.3	E430024I08Rik	0.415692	3.67839	20.9227	0.000122569	0.0136194	16.4996	13.5454	15.7723	11.8843	14.4438	13.2075	9.55721	10.2956	10.3034	11.1283	10.5927	11.9966
	ENSMUSG00000110444.3	Gm10033	0.413757	3.66772	21.0983	0.000116738	0.0131398	13.2573	16.0406	15.2061	12.1639	13.5002	13.8171	8.70768	11.7476	9.78456	10.2451	9.88174	12.5648
	ENSMUSG00000026276.21	ENSMUSG00000026276.21	0.412647	4.47634	14.7949	0.000775732	0.0361466	24.8575	20.2587	25.3166	29.1515	29.6133	24.5186	16.6366	20.3933	17.0489	21.9917	16.9198	22.3515
	ENSMUSG00000003032.9	Klf4	0.411439	7.68633	15.1289	0.000695867	0.0345296	159.52	251.125	241.761	255.303	246.996	195.201	165.8	148.033	177.456	169.663	187.753	166.373
	ENSMUSG00000034765.7	Dusp5	0.409195	3.98619	17.5053	0.00033054	0.0240738	15.5629	17.5853	15.1253	16.2186	16.476	18.1519	9.20323	10.8236	13.2685	14.0429	12.2278	15.2167
	ENSMUSG00000032265.15	Tent5a	0.408807	4.74023	16.0275	0.000522119	0.0295782	24.2811	24.8332	21.9195	23.9783	19.6696	22.8254	18.8312	20.3273	12.2307	15.9859	16.9909	19.0051
	ENSMUSG00000037573.6	Tob1	0.407543	5.63173	41.2715	1.21011e-06	0.000837781	51.8764	53.4093	64.8687	58.6525	63.7993	52.6947	43.326	44.8784	35.7285	47.6928	42.5128	46.0289
	ENSMUSG00000033446.8	Lpar6	0.407092	4.02757	18.0487	0.000280663	0.0223166	21.2549	21.2092	19.0886	19.1547	17.7099	16.6618	13.7341	14.8495	11.0447	14.1312	15.0003	17.8686
	ENSMUSG00000020962.15	Gtf2a1	0.404944	5.48039	32.6724	6.86982e-06	0.0027064	44.2391	46.696	52.3318	50.6132	44.7829	51.0015	35.4679	35.5067	32.2446	32.9434	34.7638	47.3548
	ENSMUSG00000051341.7	Zfp52	0.397313	3.33533	14.4886	0.000857831	0.0376901	10.015	11.169	13.184	9.85698	11.8308	9.27915	6.58385	9.89965	7.19017	7.06561	8.531	10.0392
	ENSMUSG00000049516.10	Spty2d1	0.395921	5.15391	24.7481	4.42805e-05	0.00738037	36.6017	39.8045	36.6403	34.8839	35.4199	35.2879	27.0434	30.5569	21.867	23.4048	28.2945	34.5374
	ENSMUSG00000018427.9	Ypel2	0.387898	4.56908	14.0853	0.00098067	0.0388103	33.2874	26.3185	25.2357	26.0057	28.8149	28.7179	17.9817	16.6314	21.5705	20.4903	22.2517	29.5494
	ENSMUSG00000059921.16	Unc5c	0.386775	3.86259	21.4768	0.000105167	0.0126595	16.4996	16.9912	15.1253	16.9177	15.0244	12.7334	12.8845	11.6816	11.0447	9.98017	12.7254	12.8805
	ENSMUSG00000071302.11	2610044O15Rik8	0.385654	3.63322	15.7733	0.00056589	0.0306536	16.0673	12.7731	16.9856	12.094	11.7582	13.4107	11.7518	11.6156	9.71044	8.92033	9.38409	11.8703
	ENSMUSG00000031880.8	Rrad	0.383374	3.68773	12.9991	0.00141783	0.0470816	13.6896	13.7236	14.5591	12.0241	15.3873	16.0522	9.84038	9.23967	9.56219	12.6298	12.3699	11.9334
	ENSMUSG00000009633.4	G0s2	0.379476	6.00846	13.608	0.00115137	0.0423544	52.8851	60.5384	72.9571	61.8683	84.3399	69.5597	45.733	59.3979	64.1927	47.5162	45.3565	46.7234
	ENSMUSG00000056592.15	Zfp658	0.377867	3.21427	14.4167	0.000878436	0.0376901	10.6635	10.872	8.81632	12.0241	12.1211	7.58587	9.20323	6.99575	7.5608	8.30209	7.82008	7.95561
	ENSMUSG00000044150.13	Bclaf3	0.377131	3.31694	14.8785	0.000754853	0.0358483	9.87093	11.4067	12.6179	10.8357	10.3066	10.837	8.21212	8.84368	6.30066	7.50721	8.95755	10.6706
	ENSMUSG00000000078.8	Klf6	0.376388	7.7398	32.7381	6.77243e-06	0.0027064	212.91	221.657	258.99	217.832	246.415	207.799	172.03	192.581	155.219	160.036	192.445	179.254
	ENSMUSG00000033900.14	Map9	0.373376	2.97336	13.3588	0.00125317	0.0444996	9.65478	6.95093	11.4046	8.45883	9.72595	8.19545	5.66353	7.85372	7.2643	6.27073	7.03807	7.63991
	ENSMUSG00000030322.13	Mbd4	0.372903	2.90878	14.3552	0.000896489	0.0377484	10.0871	8.0203	8.89721	7.82966	8.92755	9.68553	6.0175	7.85372	6.59717	6.80065	7.18025	6.75595
	ENSMUSG00000003541.7	Ier3	0.370578	7.05357	15.911	0.00054171	0.03	148.424	136.167	147.775	122.269	127.091	133.091	96.7756	101.636	134.686	80.8129	100.808	115.041
	ENSMUSG00000032841.16	Prr5l	0.363781	5.23645	15.5754	0.000602748	0.0317555	42.2937	30.4772	43.9199	34.1849	48.9201	43.9574	26.5478	29.171	31.5775	31.2653	31.5647	38.831
	ENSMUSG00000020205.9	Phlda1	0.358677	6.11868	13.7621	0.00109296	0.0410962	58.2169	67.1923	73.4424	72.4943	84.9932	96.449	47.0073	60.6518	57.4472	64.6503	55.1671	68.1909
	ENSMUSG00000026721.17	Rabgap1l	0.356076	6.54891	13.4212	0.00122682	0.0440283	103.393	109.848	103.855	97.1018	89.4206	89.5404	76.5992	84.939	59.9675	65.5335	73.9353	101.844
	ENSMUSG00000018209.16	Stk4	0.3545	6.98552	23.4121	6.2558e-05	0.00888837	170.472	130.107	146.076	129.749	138.05	149.076	108.032	111.734	103.479	112.608	119.576	119.776
	ENSMUSG00000078779.5	Zfp59	0.35437	3.07696	13.9004	0.00104329	0.0400983	8.14172	10.6343	10.2722	9.57735	8.7098	8.87276	6.72544	8.3157	6.89367	7.15393	6.54043	8.27131
	ENSMUSG00000067942.7	Zfp160	0.351573	4.30044	18.3171	0.000259099	0.0210338	22.1916	21.5063	21.4342	20.483	21.6293	20.2516	15.9995	17.8854	14.3803	14.4845	17.4174	19.447
	ENSMUSG00000026986.15	Hnmt	0.348494	3.81621	13.2289	0.00131012	0.045088	16.1393	18.714	15.8532	15.939	14.4438	12.7334	11.681	12.7375	13.6391	11.04	11.8723	12.6911
	ENSMUSG00000113047.3	Gm47469	0.348348	3.4923	13.0916	0.00137337	0.0466576	13.9058	13.2484	12.7796	13.4922	13.4276	10.9047	10.2651	9.43766	8.00555	10.7751	10.8059	11.744
	ENSMUSG00000012350.16	Ehf	0.348027	5.38373	15.9431	0.000536224	0.0298872	48.6342	52.1023	45.5375	34.814	42.4603	45.1766	35.6094	37.0907	36.1732	30.912	32.1334	39.0204
	ENSMUSG00000047875.7	Gpr157	0.34678	3.61432	17.8855	0.000294723	0.022366	14.3381	13.486	14.0738	11.9542	12.1937	11.3788	10.2651	10.2956	9.63631	10.0685	10.5216	10.0392
	ENSMUSG00000059897.6	Zfp930	0.345367	3.79035	14.8045	0.000773312	0.0361466	16.1393	18.9517	14.8826	15.5195	14.3712	13.9526	12.8845	13.8595	10.3034	10.5101	11.8723	14.2696
	ENSMUSG00000022048.9	Dpysl2	0.345221	7.10333	37.6943	2.41674e-06	0.00130912	137.4	149.178	139.12	172.043	154.744	153.614	108.173	120.842	112.226	117.554	124.268	130.131
	ENSMUSG00000021390.7	Ogn	0.342454	8.4248	20.7327	0.000129238	0.0140893	355.426	434.344	427.066	404.136	334.094	328.495	287.636	314.809	276.117	265.314	299.58	357.182
	ENSMUSG00000034522.11	Zfp395	0.3411	5.69653	20.8496	0.000125089	0.0138108	59.874	61.489	68.5894	59.841	58.2831	56.2845	44.7419	46.0664	52.555	53.6986	46.7783	44.0084
	ENSMUSG00000007777.10	0610009B22Rik	0.338705	3.23787	14.9121	0.000746622	0.0357512	9.94298	11.7037	11.4855	9.15791	10.5969	10.2274	6.72544	8.77769	8.1538	8.47873	8.38881	9.34468
	ENSMUSG00000032377.9	Plscr4	0.337072	6.06949	34.1959	4.9547e-06	0.00221484	67.1512	74.5591	76.2733	77.9471	74.7591	63.2608	54.9362	58.4079	53.0738	54.2285	56.2335	66.3599
	ENSMUSG00000026034.18	Clk1	0.333056	7.64067	65.9551	2.41023e-08	4.87907e-05	199.652	219.875	223.32	219.021	218.979	223.174	178.401	174.762	161.89	166.218	179.293	174.518
	ENSMUSG00000034640.10	Tiparp	0.332523	5.48265	30.3487	1.15152e-05	0.0038123	43.8068	49.9635	44.486	48.0266	50.3717	46.328	41.1314	41.1825	36.7662	33.2967	36.0435	36.1791
	ENSMUSG00000074165.11	Zfp788	0.332286	4.25768	16.8491	0.000404019	0.0270396	23.5605	19.2487	21.0298	20.3431	23.0084	20.9289	18.4773	16.0374	14.0838	15.2794	18.3416	19.2576
	ENSMUSG00000044548.12	Dact1	0.331762	4.50297	15.8762	0.000547712	0.0302205	23.6326	23.9421	25.074	21.6015	26.4197	24.6541	13.3093	18.0834	19.2726	21.1968	19.7635	23.8037
	ENSMUSG00000060487.8	Samd5	0.33169	4.3491	13.5106	0.00119007	0.0430396	21.0388	21.3281	22.8092	21.8112	22.4277	17.7455	14.796	15.8394	14.6027	14.7495	19.408	21.2781
	ENSMUSG00000024027.9	Glp1r	0.330277	7.6865	21.8686	9.44914e-05	0.0119445	226.671	198.785	231.408	255.722	234.584	230.624	161.694	179.448	187.093	184.589	172.397	210.445
	ENSMUSG00000027993.17	Trim2	0.328298	4.84257	17.4293	0.000338261	0.0245331	32.1346	27.8631	33.3241	29.7807	30.5569	32.3754	22.4417	26.2011	21.867	21.8151	24.3844	30.9385
	ENSMUSG00000037826.6	Ppm1k	0.328052	4.38633	14.5879	0.000830215	0.0375164	26.5867	19.427	21.9195	19.0848	22.7181	18.1519	17.4154	16.4334	15.344	17.0458	17.9151	17.5529
	ENSMUSG00000011960.13	Ccnt1	0.32675	5.47468	26.563	2.81329e-05	0.00609569	42.7981	50.0823	51.0376	48.2363	46.5974	47.344	34.9723	39.7306	33.3565	35.2397	38.816	45.65
	ENSMUSG00000030067.18	Foxp1	0.326026	6.85403	20.3382	0.000144376	0.0152599	149.649	135.573	125.37	106.469	123.607	118.055	104.492	95.4986	91.0261	92.8244	107.348	113.841
	ENSMUSG00000035356.18	Nfkbiz	0.323274	4.74385	21.6851	9.93362e-05	0.0123633	27.091	23.8827	24.1842	25.9358	28.8149	31.9013	18.5481	21.5152	20.7551	22.1683	22.7493	23.5511
	ENSMUSG00000026094.15	Stk17b	0.323037	5.8472	14.4732	0.000862189	0.0376901	61.8915	60.8949	67.6188	62.6373	72.0736	74.2332	50.7594	59.5959	47.5886	45.2199	60.3568	55.2473
	ENSMUSG00000039989.8	Cbx4	0.319888	5.52213	25.3364	3.81516e-05	0.00702793	44.2391	48.3	51.442	46.4886	50.5169	53.5075	37.0961	38.6746	36.9886	42.1287	39.4559	41.6091
	ENSMUSG00000063253.12	Scoc	0.318773	5.16557	18.3241	0.000258561	0.0210338	39.6999	40.1015	38.258	38.3094	33.8231	34.6783	28.2469	29.8969	27.7229	24.1997	31.2092	38.5153
	ENSMUSG00000032757.7	Bet1	0.317767	4.60885	16.8338	0.000405932	0.0270632	25.3618	26.972	26.7725	27.3339	24.2423	26.0764	18.1941	20.4593	22.7565	17.3991	19.9767	26.645
	ENSMUSG00000017144.9	Rnd3	0.316234	4.68855	15.3563	0.000646624	0.0325937	24.7134	22.9321	28.9564	27.9631	28.9601	29.0566	22.2294	20.7233	21.0516	21.9034	19.6924	24.7508
	ENSMUSG00000038175.11	Mylip	0.315257	5.52755	19.0944	0.000206181	0.0187117	47.4093	50.2012	45.3758	56.2757	54.5814	54.5235	35.6094	36.4967	37.8781	45.3965	45.8541	46.7866
	ENSMUSG00000025956.11	Mettl21a	0.313341	3.7464	16.8609	0.000402552	0.0270396	12.825	16.2188	13.6693	15.939	13.7905	15.5781	12.7429	12.0776	10.1552	12.8064	11.5168	11.6809
	ENSMUSG00000037211.13	Spry1	0.313194	7.01671	23.6937	5.81137e-05	0.0085002	126.953	128.8	145.995	148.624	160.696	154.562	106.05	103.682	117.934	116.406	119.647	132.846
	ENSMUSG00000059839.10	Zfp874b	0.3129	3.81276	15.4654	0.000624346	0.0322096	15.4909	14.6148	17.2282	17.1274	15.5325	14.9008	11.7518	12.6055	10.0069	13.4247	13.223	15.2167
	ENSMUSG00000020063.17	Sirt1	0.312504	4.83265	13.0512	0.00139259	0.0466951	29.2525	29.1107	30.0887	32.5071	29.6133	30.8176	24.7779	29.039	19.5691	20.0487	25.5219	26.645
	ENSMUSG00000046404.6	Yod1	0.312469	3.97485	14.4473	0.000869586	0.0376901	17.0039	14.9118	17.7944	15.7991	18.218	15.2395	12.9553	15.3774	11.7859	10.7751	12.2989	16.0375
	ENSMUSG00000053040.14	Aph1c	0.311696	3.77346	16.4911	0.000451462	0.0281453	17.8685	12.2384	15.8532	15.7292	15.6051	15.9168	13.3093	14.1235	10.8223	12.0115	12.2989	12.3123
	ENSMUSG00000047407.18	Tgif1	0.311506	4.73697	18.3027	0.000260209	0.0210338	30.1172	32.3189	26.449	25.8658	25.6939	27.2956	23.5744	23.4952	19.5691	22.6983	22.6071	23.2986
	ENSMUSG00000021712.16	Trim23	0.309225	3.99911	18.8769	0.00021969	0.0192329	17.5083	16.2188	17.9562	15.7292	15.7502	16.9328	12.8137	14.9815	11.1188	11.7466	14.9292	14.901
	ENSMUSG00000060548.14	Tnfrsf19	0.308434	6.21776	18.3099	0.000259649	0.0210338	88.9104	76.6385	86.95	76.0596	91.4529	79.6517	61.5201	64.3477	74.0513	55.9949	65.8308	81.1977
	ENSMUSG00000028518.9	Prkaa2	0.308197	4.29364	19.1811	0.000201055	0.0184397	20.8226	18.8923	23.4563	19.4343	23.1536	21.6739	18.4065	15.7074	14.3803	16.2509	18.7682	19.1313
	ENSMUSG00000053870.8	Fpgt	0.306687	4.15228	16.5241	0.000446845	0.0280823	19.958	17.9417	23.6989	19.1547	18.5809	18.0842	15.1499	17.0934	14.4545	14.7495	16.4933	16.6689
	ENSMUSG00000042677.8	Zc3h12a	0.305768	4.32843	13.5905	0.00115822	0.0423558	19.5257	17.4664	18.4415	20.9024	20.9035	21.4707	17.9109	16.8954	14.8251	17.0458	15.9245	13.5119
	ENSMUSG00000022253.18	Nadk2	0.305719	4.25982	14.5441	0.000842278	0.037629	21.9034	23.2886	23.4563	20.6927	18.5809	19.3033	15.9287	18.7433	15.4922	16.7808	15.9245	19.889
	ENSMUSG00000068523.13	Gng5	0.303973	6.31735	13.4364	0.00122047	0.0438913	71.5462	98.1447	91.2368	81.3725	79.7673	81.8868	62.8652	72.1354	65.7493	53.0804	67.537	86.312
	ENSMUSG00000120166.1	ENSMUSG00000120166.1	0.303179	3.77432	13.2683	0.00129256	0.0450298	16.8598	15.2683	16.3385	16.8478	14.4438	12.1239	12.8845	12.4076	10.8964	11.7466	13.4363	12.9437
	ENSMUSG00000044763.9	Trmt10c	0.300796	3.8958	13.9836	0.00101457	0.0396989	17.6524	15.803	16.2576	17.0575	14.9518	14.2912	12.6721	14.5195	9.71044	13.248	13.5785	14.0802
	ENSMUSG00000040423.12	Rc3h1	0.300519	5.67212	18.2939	0.000260889	0.0210338	50.6516	61.4296	56.4568	57.4641	50.4443	51.1369	41.9809	45.9344	38.8417	38.7725	44.5745	55.4998
	ENSMUSG00000039166.17	Akap7	0.30035	5.24699	19.107	0.000205432	0.0187117	40.7086	37.7845	40.7654	42.3641	37.8151	44.567	33.0609	34.3848	31.1327	31.5303	30.9249	36.8736
	ENSMUSG00000025898.7	Cwf19l2	0.297893	4.00941	19.9149	0.000162791	0.0164059	18.517	15.9812	18.118	18.2459	18.6535	15.5104	15.2207	13.4635	13.3426	14.0429	13.934	15.2798
	ENSMUSG00000113204.3	Gm46430	0.296452	4.28052	18.1597	0.00027152	0.0217895	22.6959	22.2786	21.1915	19.5042	20.6858	19.9806	16.2119	17.6874	14.3062	17.0458	18.8393	18.6894
	ENSMUSG00000043015.16	Nemp2	0.296297	3.94524	14.5852	0.000830957	0.0375164	21.327	16.8723	20.14	16.0089	16.9115	17.4069	14.2296	13.8595	13.9356	15.5443	15.498	15.343
	ENSMUSG00000021635.15	Rad17	0.293775	4.29758	16.8534	0.000403483	0.0270396	19.886	19.3081	20.7062	23.2793	21.1213	23.8413	18.2649	19.2713	16.6782	15.3677	14.716	19.9522
	ENSMUSG00000070287.4	Slc35g2	0.292533	4.09177	15.3454	0.000648885	0.0326022	15.3468	18.1794	19.4121	19.2246	17.0567	16.7296	15.3623	14.3875	16.4559	13.0714	12.7965	14.3327
	ENSMUSG00000056537.12	Rlim	0.289045	6.00879	22.3116	8.38167e-05	0.0108424	66.0704	67.3111	72.7145	71.6554	68.8074	69.7629	55.007	59.9259	49.6641	48.576	61.2099	65.8548
	ENSMUSG00000035762.12	Tmem161b	0.287735	3.72585	15.6322	0.000591911	0.0314438	13.9778	13.4266	12.6987	14.2612	15.2422	15.5104	10.9731	12.0776	11.9342	9.18529	12.7965	12.5648
	ENSMUSG00000022863.16	Btg3	0.287044	5.59462	19.5965	0.000178323	0.0170796	46.4006	55.6668	46.9126	49.0752	49.9362	51.3401	38.0164	41.6445	43.2151	33.7383	39.9535	48.4913
	ENSMUSG00000021466.13	Ptch1	0.286636	6.44631	27.7803	2.0952e-05	0.00485929	97.3404	93.8078	102.318	96.5425	101.905	99.0905	73.9091	73.4554	77.6835	82.8442	86.2341	90.2899
	ENSMUSG00000022893.15	Adamts1	0.286086	7.28938	17.6546	0.000315945	0.0234247	142.66	162.545	189.753	158.481	185.446	160.455	149.871	133.579	137.28	120.734	143.036	134.74
	ENSMUSG00000046916.10	Myct1	0.28275	6.29716	13.0778	0.00137987	0.0466576	84.011	73.0739	97.1413	85.4971	97.695	83.7155	63.0068	58.7379	74.8667	73.5706	72.3002	85.6175
	ENSMUSG00000021022.10	Ppp2r3c	0.28034	4.20051	16.4376	0.000459061	0.0281453	21.8313	20.0805	19.6547	18.176	18.4358	19.7775	17.2738	17.7534	16.4559	14.0429	15.0714	16.3532
	ENSMUSG00000003031.15	Cdkn1b	0.279613	6.2638	24.8348	4.33141e-05	0.00728939	83.0743	86.0252	90.5898	87.8041	85.0657	81.4804	70.7941	68.3076	61.5983	64.6503	74.1486	83.597
	ENSMUSG00000031628.10	Casp3	0.27911	4.43435	13.509	0.00119069	0.0430396	25.0736	21.3281	23.2945	23.6987	23.952	28.6502	18.902	20.3273	17.7901	19.6954	20.0478	23.3617
	ENSMUSG00000027900.16	Dram2	0.278685	6.13913	13.5062	0.00119182	0.0430396	74.5003	76.7573	78.6999	75.9197	68.88	70.1693	54.9362	63.2917	54.5563	53.257	61.281	78.9247
	ENSMUSG00000041135.16	Ripk2	0.274688	3.98626	13.2812	0.00128685	0.0449722	15.9952	14.9712	15.4488	17.5468	14.3712	14.6976	12.3182	12.8695	12.2307	14.5728	13.2941	11.744
	ENSMUSG00000060301.7	2610008E11Rik	0.272182	4.89008	14.8406	0.000764243	0.0359983	34.7284	30.0613	32.1108	30.27	35.3473	33.0527	25.4151	28.577	24.1649	23.7581	27.5836	32.0119
	ENSMUSG00000108621.3	Gm33989	0.271996	5.49058	14.3463	0.000899132	0.0377484	52.3808	48.6565	50.3906	47.0479	46.8152	45.4475	39.4323	40.5885	31.874	36.1229	43.2948	48.9965
	ENSMUSG00000043542.13	Zc2hc1a	0.271781	5.16519	12.9173	0.0014585	0.0482496	36.8179	36.0617	43.9199	36.1423	36.436	34.6105	33.4148	30.8869	27.7229	27.2026	28.9343	36.8105
	ENSMUSG00000044712.16	Slc38a6	0.271752	4.23886	18.936	0.00021593	0.0190966	20.5344	20.1399	19.9783	20.9723	20.3229	22.8254	18.0525	18.0834	16.3817	16.6925	17.7018	16.4163
	ENSMUSG00000090000.3	Ier3ip1	0.270886	5.00748	22.7896	7.37484e-05	0.00998714	29.973	35.4082	30.7358	35.3733	34.0408	34.2719	25.5567	27.389	26.611	24.9946	30.0007	30.9385
	ENSMUSG00000021377.16	Dek	0.270436	6.32222	24.6335	4.55952e-05	0.00745611	85.452	88.0451	92.2074	85.4272	85.3561	81.2095	68.8827	81.9691	61.9689	65.6218	74.4329	75.9571
	ENSMUSG00000038068.16	Rnf144b	0.270241	5.45292	22.1788	8.68719e-05	0.0111544	48.9944	47.3495	47.8023	43.9719	46.3797	45.312	38.5828	37.7506	37.5075	34.1799	37.4653	46.1552
	ENSMUSG00000045205.17	Dpy19l4	0.268333	4.73078	20.1472	0.000152387	0.0157231	29.1805	29.1701	25.8828	27.9631	28.452	26.9569	22.6541	24.2211	23.4978	20.4019	22.1806	26.0136
	ENSMUSG00000111080.2	Gm20300	0.26817	4.76734	24.6559	4.53348e-05	0.00745611	27.8115	33.9229	29.3608	29.7807	28.8875	27.702	23.2205	23.3632	25.1285	22.7866	25.1664	27.6552
	ENSMUSG00000038119.16	Cdon	0.267543	4.62637	16.6269	0.000432781	0.0275954	24.4252	29.6454	27.4196	26.4251	27.581	30.8853	24.9195	21.1852	22.0894	24.3763	23.1759	22.6672
	ENSMUSG00000029385.15	Ccng2	0.266198	5.53126	19.5961	0.000178344	0.0170796	55.1187	47.6465	53.1406	55.0873	50.4443	52.4915	42.5473	42.8985	39.3606	41.6871	45.4986	48.7439
	ENSMUSG00000043673.12	Kcns3	0.265109	4.56977	19.3827	0.000189652	0.0177699	23.2003	23.0509	25.3166	24.8871	25.5488	23.8413	19.5392	19.7993	19.3467	20.3136	21.8251	20.4573
	ENSMUSG00000041303.8	Gtf3c3	0.264964	4.1855	18.3529	0.000256358	0.0210338	20.1742	19.2487	20.3827	18.3857	18.3632	18.2874	16.2119	15.8394	14.6768	15.456	15.4269	17.8054
	ENSMUSG00000037762.7	Slc16a9	0.262707	7.1243	18.5735	0.000240172	0.0201927	137.112	136.286	157.481	140.584	169.696	142.303	112.633	134.965	111.781	116.936	132.87	126.848
	ENSMUSG00000105692.2	Gm43737	0.26164	3.58136	13.3477	0.00125792	0.0444996	14.3381	11.7631	11.6473	13.5621	13.5002	12.9366	10.9731	10.6916	11.7859	9.80353	11.4458	10.1024
	ENSMUSG00000040774.16	Cept1	0.259301	6.0272	13.2385	0.00130582	0.045088	67.2232	76.1632	67.9423	67.8105	60.6783	63.464	48.2816	61.5098	52.8515	46.633	58.3662	68.8855
	ENSMUSG00000044934.14	Zfp367	0.258204	4.47305	14.0423	0.000994857	0.0392341	24.7134	24.2391	25.5593	23.2094	20.9035	22.7576	19.8931	20.0633	19.1244	16.6925	19.1236	22.9829
	ENSMUSG00000032038.8	St3gal4	0.254312	5.80931	17.6027	0.000320935	0.0236727	52.4528	59.5879	55.2436	60.2604	57.7024	59.8065	44.1755	50.8842	54.4822	47.0746	48.2712	44.5135
	ENSMUSG00000022507.7	1810013L24Rik	0.253901	6.11335	21.1213	0.000115996	0.0131398	66.5748	70.6975	76.6778	72.704	69.4607	69.8307	55.2902	60.8498	54.8528	55.2884	59.6459	70.9059
	ENSMUSG00000049800.14	Sertad2	0.253533	6.112	23.9439	5.44516e-05	0.00835279	71.1139	66.3606	78.2145	73.7526	73.0172	71.4562	64.989	60.3218	52.6291	53.9636	65.973	65.6653
	ENSMUSG00000035329.8	Fbxo33	0.251866	4.54925	13.4132	0.00123016	0.044057	23.5605	23.7639	24.346	25.7959	25.9842	26.0764	25.3443	20.5253	19.2726	18.3706	21.0431	20.8361
	ENSMUSG00000021824.14	Ap3m1	0.250982	6.7948	23.6815	5.82991e-05	0.0085002	99.2137	118.998	115.906	128.63	120.413	111.011	94.9349	99.8544	102.516	89.8215	93.6277	102.413
	ENSMUSG00000025979.14	Mob4	0.250753	5.37777	17.024	0.000382835	0.0264105	40.4204	44.2008	42.3022	45.5798	46.8152	42.1287	36.8129	36.3647	34.7648	32.5018	38.816	40.22
	ENSMUSG00000027208.15	Fgf7	0.249999	4.60177	13.8174	0.0010728	0.0406997	25.0016	27.0314	28.1475	26.6348	25.331	24.7896	20.2471	21.6472	24.0908	23.8464	21.0431	21.215
	ENSMUSG00000000142.16	Axin2	0.24968	5.46578	14.3552	0.000896495	0.0377484	59.3697	47.9436	47.964	55.8562	48.9201	48.4954	37.3085	40.0606	47.8109	44.69	43.0815	46.5971
	ENSMUSG00000019917.11	Septin10	0.249449	4.61611	21.5521	0.00010302	0.0126595	23.6326	25.7244	25.074	24.1881	27.8714	25.2637	20.9551	21.9772	20.088	21.1085	19.5502	23.8668
	ENSMUSG00000020305.14	Asb3	0.24868	3.5732	13.3192	0.00127025	0.0446623	13.7617	10.3967	12.7796	13.5621	13.9357	13.5462	11.5394	11.6816	10.7482	11.305	9.66846	10.6075
	ENSMUSG00000060427.16	Zfp868	0.247414	3.83555	13.1374	0.00135188	0.0460383	14.1219	13.3078	16.5812	14.4709	15.5325	13.8849	11.9642	10.8896	11.3412	12.8064	13.934	13.0068
	ENSMUSG00000031465.7	Angpt2	0.247308	5.30007	14.0391	0.000995904	0.0392341	37.8266	37.3093	45.4566	43.6224	46.162	44.2284	31.4326	37.8166	38.1005	35.7696	36.0435	35.1688
	ENSMUSG00000021754.18	Map3k1	0.247023	5.13429	14.1486	0.000960186	0.0384395	39.6278	38.6757	37.8536	35.0237	38.5409	39.4194	33.2732	31.5469	28.6124	31.8836	32.56	35.1057
	ENSMUSG00000028300.15	C9orf72	0.246988	4.11345	13.9478	0.00102683	0.0399977	19.5257	17.9417	18.118	18.5954	17.7099	20.1161	15.6455	17.3574	14.751	15.456	14.1472	16.9215
	ENSMUSG00000074212.8	Dnajb14	0.246408	5.00969	13.7037	0.00111471	0.0414642	35.4489	35.2299	34.4565	35.3733	31.7908	31.9013	28.9548	28.643	29.4278	24.288	27.157	33.3378
	ENSMUSG00000044408.8	Sptssa	0.245466	5.76439	24.881	4.28085e-05	0.00727492	59.0815	55.7263	60.0157	60.8896	54.4363	59.671	48.3524	50.4882	45.8095	47.8695	47.2759	55.0579
	ENSMUSG00000071180.6	Smim15	0.24428	5.66382	15.7778	0.000565076	0.0306536	48.346	54.1816	56.6995	55.4368	52.0411	51.2046	41.8393	49.6962	40.3243	39.2141	45.1432	51.7115
	ENSMUSG00000026753.6	Ppp6c	0.244255	5.8612	12.8172	0.00150997	0.0495716	52.8851	63.5683	62.3613	66.4123	52.1862	58.0455	51.0426	51.8081	44.1047	42.7469	51.6125	58.4043
	ENSMUSG00000002944.16	Cd36	0.242606	10.093	18.0843	0.000277689	0.0221818	1070.82	1158.49	1220.45	1108.46	1221.19	1060.33	928.748	985.081	911.373	825.793	997.273	1132.29
	ENSMUSG00000047044.8	D030056L22Rik	0.242464	4.43731	13.8117	0.00107484	0.0406997	21.9034	22.4568	24.5078	26.2853	21.2664	20.0484	18.4773	19.4693	16.3817	19.6954	20.7588	20.4573
	ENSMUSG00000022299.10	Slc25a32	0.241196	4.49113	22.0472	9.00195e-05	0.0114735	23.8487	24.655	23.8607	26.9145	25.331	22.6899	20.3887	21.3172	19.7174	18.9888	21.754	22.2883
	ENSMUSG00000033319.6	Fem1c	0.240751	5.47629	14.4221	0.000876877	0.0376901	48.418	43.6067	45.9419	46.1391	47.0329	47.344	39.2907	40.9845	34.3942	33.5616	40.6644	46.2814
	ENSMUSG00000050668.11	Gpatch11	0.238328	4.16521	23.6855	5.82384e-05	0.0085002	20.8226	21.1498	19.7356	20.3431	19.3793	19.9806	17.6277	15.9054	16.0111	18.6355	17.7729	17.1109
	ENSMUSG00000031517.9	Gpm6a	0.237765	5.67427	13.6656	0.00112914	0.0417325	47.9857	57.9244	57.5892	53.6192	50.662	48.1567	45.8038	41.1825	48.3298	39.9207	41.4464	51.0169
	ENSMUSG00000028035.14	Dnajb4	0.235416	6.50066	19.8076	0.000167854	0.0166543	82.2818	100.64	85.0088	103.673	95.7353	90.5564	85.3777	78.6032	76.201	69.9495	82.7507	80.9452
	ENSMUSG00000048249.15	Crebrf	0.233756	6.12371	18.5599	0.000241139	0.0201927	78.3911	64.1624	76.8395	67.8804	72.4365	71.5917	62.1572	60.3218	54.1116	59.5277	68.3901	62.0032
	ENSMUSG00000019878.9	Hsf2	0.233117	3.96204	12.8849	0.00147495	0.0486987	14.6263	16.5159	18.0371	18.5255	17.1293	15.9168	12.7429	13.3975	15.4922	15.3677	14.5027	14.2696
	ENSMUSG00000110185.3	Igip	0.232385	5.38556	14.2914	0.000915658	0.0379601	43.9509	45.9831	44.8905	47.5372	45.5087	42.6705	34.5475	38.3446	34.5425	36.6528	38.2473	47.6705
	ENSMUSG00000040128.10	Pnrc1	0.230885	6.40972	15.1209	0.000697671	0.0345296	94.1701	91.3126	89.7	96.962	88.3319	87.3053	70.7941	72.0034	72.1982	79.753	81.471	90.4793
	ENSMUSG00000022051.16	Bnip3l	0.228555	7.31799	14.5228	0.000848201	0.0376901	158.944	161.891	181.018	170.155	175.14	167.363	134.792	147.901	131.795	126.386	147.017	177.423
	ENSMUSG00000025036.8	Sfxn2	0.226416	4.93237	16.718	0.000420727	0.0273141	32.2066	30.1801	29.199	30.8293	29.6133	31.8336	27.4681	24.8811	23.7202	25.9661	27.3703	27.7184
	ENSMUSG00000032369.14	Plscr1	0.226412	6.0001	16.2371	0.000488783	0.0288831	65.9263	56.855	66.6482	61.1692	68.2994	60.9579	55.1486	54.646	59.9675	46.1031	56.1624	52.2797
	ENSMUSG00000047669.9	Msl3l2	0.225676	4.05161	15.9216	0.000539886	0.0299948	17.148	18.0011	17.2282	17.3371	17.4922	15.9168	14.5128	14.3875	13.3426	15.2794	14.3605	16.2901
	ENSMUSG00000029179.15	Zcchc4	0.22444	3.79154	13.9267	0.0010341	0.0400314	14.7704	15.5653	15.5297	14.1913	15.4599	14.0881	13.1677	13.7935	11.8601	11.4816	13.4363	12.8174
	ENSMUSG00000058291.15	Zfp68	0.223857	5.71934	23.443	6.20523e-05	0.00888837	56.7759	52.2211	57.1039	59.7711	56.0331	52.2206	50.6886	46.2643	43.734	47.4279	49.4798	48.3651
	ENSMUSG00000078851.5	H2ac25	0.223596	4.49092	13.2859	0.00128477	0.0449722	23.1282	26.4373	24.8313	25.5862	22.2826	25.1959	18.2649	21.0532	22.0894	23.0515	21.3275	20.7098
	ENSMUSG00000071256.5	Zfp213	0.220521	3.69709	13.227	0.00131097	0.045088	13.7617	13.0107	12.9414	14.5408	12.847	13.2753	12.035	11.8136	10.3034	11.2167	12.7965	10.7969
	ENSMUSG00000020154.11	Ptprb	0.219897	9.35303	15.5755	0.000602731	0.0317555	663.226	704.361	664.864	700.825	658.243	666.338	565.291	557.68	532.962	531.422	605.985	690.623
	ENSMUSG00000030157.6	Clec2d	0.218145	7.50312	17.1232	0.000371367	0.0260619	170.76	180.189	155.944	166.52	169.841	168.108	140.031	144.667	136.761	132.657	145.667	169.467
	ENSMUSG00000026434.13	Nucks1	0.217071	6.4391	17.2895	0.000352959	0.0252818	95.0347	94.8772	89.5383	94.7948	91.09	91.6401	77.0948	86.5229	74.0513	70.0378	78.9828	92.1209
	ENSMUSG00000075700.11	Selenot	0.216949	7.22833	18.7071	0.000230906	0.0198145	147.343	161.594	148.907	158.201	151.551	152.463	127.713	138.859	119.564	120.822	129.671	154.692
	ENSMUSG00000027808.9	Serp1	0.216681	7.28316	15.2167	0.000676382	0.0337879	150.442	181.318	154.407	157.152	150.099	155.104	130.403	142.225	128.83	117.024	141.117	156.397
	ENSMUSG00000036478.9	Btg1	0.216557	7.26272	20.1795	0.000151	0.0156733	160.745	146.029	156.267	162.046	161.639	184.635	137.199	147.835	130.09	134.423	144.245	142.001
	ENSMUSG00000021770.12	Samd8	0.214211	4.72494	14.1673	0.000954223	0.0384395	28.0997	27.0908	27.1769	30.9691	25.2584	26.4828	22.2294	25.4751	21.0516	23.0515	23.6024	26.7081
	ENSMUSG00000029422.16	Rsrc2	0.213534	6.14523	21.8453	9.50926e-05	0.0119445	72.7711	75.0344	77.5675	71.166	73.0898	74.6396	61.8741	71.1455	60.4864	61.2058	60.7123	67.4964
	ENSMUSG00000020390.13	Ube2b	0.213352	6.45955	31.1586	9.59305e-06	0.00332572	95.1068	92.7385	93.2589	96.1231	92.9772	85.0024	82.5459	82.629	74.6443	75.337	80.6179	82.9025
	ENSMUSG00000030629.16	Zfand6	0.209531	6.0251	13.7148	0.00111053	0.0413976	63.4045	74.5591	71.4203	66.4123	66.1945	67.3246	55.7858	66.1296	51.7396	55.2884	59.6459	65.1602
	ENSMUSG00000028015.4	Ctso	0.208035	6.24199	15.9565	0.000533961	0.0298872	75.437	71.5886	74.4939	81.4425	77.2995	80.0581	63.8563	76.9532	64.8598	57.5847	65.5465	69.3275
	ENSMUSG00000022159.17	Rab2b	0.207206	4.40759	16.4813	0.000452845	0.0281453	22.3357	22.8133	23.5372	21.5316	22.5003	23.164	21.2382	19.8653	19.1985	19.872	17.4174	20.0784
	ENSMUSG00000025245.15	Lztfl1	0.206753	4.6769	13.0519	0.00139227	0.0466951	28.8202	25.9026	29.927	27.264	26.6375	26.2796	24.8487	25.1451	22.46	22.1683	22.3228	25.5716
	ENSMUSG00000044018.4	Mrpl50	0.206299	4.574	19.5014	0.000183265	0.0173591	24.7854	24.8926	25.2357	24.7473	25.6939	26.3474	23.0789	22.2412	18.902	22.6983	22.3939	22.1621
	ENSMUSG00000031024.14	Denn2b	0.204937	7.20337	17.0494	0.000379866	0.0263384	163.555	144.9	169.613	148.204	165.486	161.877	132.385	126.781	136.168	143.343	144.245	144.337
	ENSMUSG00000040006.14	Ginm1	0.203212	5.99372	16.2949	0.000480006	0.0286391	64.3412	70.5787	60.8246	60.1206	67.2106	62.7866	57.9096	58.0119	54.4822	50.1658	55.3093	59.162
	ENSMUSG00000007812.17	Zfp655	0.202119	5.20447	17.709	0.000310798	0.0232214	42.5099	37.7845	38.9051	38.3793	39.6296	35.8974	35.0431	34.9127	30.4656	33.385	34.2662	34.4112
	ENSMUSG00000026889.13	Rbm18	0.201486	5.48406	21.1285	0.000115765	0.0131398	45.0316	45.2107	47.6405	45.6497	46.5249	44.567	38.2996	39.6646	40.769	37.3594	40.0957	42.4299
	ENSMUSG00000036533.10	Cdc42ep3	0.199852	5.52093	16.0351	0.000520865	0.0295782	45.8962	45.5078	53.0597	53.8289	51.6782	50.9337	41.4853	46.5283	46.1802	40.009	43.7214	43.7559
	ENSMUSG00000037286.16	Stag1	0.199395	5.41856	14.09	0.000979122	0.0388103	48.4901	43.7849	45.4566	41.665	46.3071	42.9415	39.0076	38.2126	39.2865	35.0631	41.0199	41.104
	ENSMUSG00000005836.11	Gata6	0.19632	5.55378	14.5224	0.000848303	0.0376901	47.8416	48.1812	50.5523	50.5433	50.2991	52.5593	41.5561	41.2485	43.5858	47.3396	40.0246	48.1125
	ENSMUSG00000005534.11	Insr	0.196052	6.16788	13.6873	0.00112091	0.0416057	79.1836	75.4503	78.7807	76.9684	73.6704	69.6952	67.75	68.5055	59.1521	60.2343	69.6698	70.464
	ENSMUSG00000032009.9	Sesn3	0.19299	5.35809	14.1779	0.000950845	0.0384395	53.0292	47.8842	43.3537	50.1238	42.3877	46.4635	38.2996	41.5125	42.1774	41.6871	39.9535	44.1978
	ENSMUSG00000024431.16	Nr3c1	0.192791	7.1258	17.27	0.000355067	0.0253281	148.064	144.663	138.473	145.338	139.429	147.586	120.562	127.639	120.602	117.289	124.695	144.527
	ENSMUSG00000027104.19	Atf2	0.192168	5.61548	16.4585	0.000456066	0.0281453	51.5882	49.7853	54.6774	52.0113	51.3878	50.3919	44.0339	46.5283	39.6571	43.4535	47.2759	49.9435
	ENSMUSG00000021302.11	Ggps1	0.190826	5.57427	17.0683	0.000377672	0.0262914	47.2652	49.9635	49.1773	52.9201	50.662	44.0252	42.3349	43.6904	38.6935	43.1002	44.7877	44.8924
	ENSMUSG00000055447.20	Cd47	0.190603	7.86479	14.3317	0.000903496	0.037829	216.08	221.954	222.268	227.41	222.318	213.827	192.277	214.822	179.087	162.244	203.962	207.162
	ENSMUSG00000000708.15	Kat2b	0.189209	6.221	16.6252	0.000433019	0.0275954	72.1947	78.1831	74.413	72.1447	74.4688	70.9144	65.9093	65.3377	61.0794	57.1431	67.2527	70.9691
	ENSMUSG00000026643.17	Nmt2	0.188681	5.21551	14.8005	0.000774318	0.0361466	38.0427	39.9233	39.1477	38.7289	39.9199	39.1485	36.7421	35.4407	30.7621	32.6784	35.1904	35.1688
	ENSMUSG00000059890.17	Ube4a	0.188014	5.81436	19.6922	0.000173491	0.0168949	63.3325	59.8849	58.6407	58.8623	57.775	56.2845	51.4673	54.1841	49.2934	48.1344	50.9016	57.2046
	ENSMUSG00000071533.12	Pcnp	0.18644	6.80833	16.8501	0.000403895	0.0270396	117.659	117.869	121.811	119.892	114.606	107.015	101.944	104.672	98.5869	90.2631	103.296	114.978
	ENSMUSG00000046949.17	Nqo2	0.185253	5.19138	19.0456	0.000209137	0.0187833	41.7893	38.6163	40.0374	39.0784	40.428	36.6425	33.4856	34.7148	34.3201	35.0631	35.9724	34.4743
	ENSMUSG00000030327.9	Necap1	0.185071	5.226	13.7731	0.00108891	0.041033	38.475	38.9133	37.0447	42.3641	37.6699	42.2642	33.9104	33.3948	35.5802	35.1514	34.4794	35.8002
	ENSMUSG00000025937.7	Lactb2	0.184707	5.30141	13.2992	0.00127895	0.044877	39.6278	40.9927	43.0301	42.2941	39.3393	41.79	38.2288	37.0247	36.9145	30.2938	36.8255	37.7576
	ENSMUSG00000048264.17	Dip2c	0.18273	5.24687	15.4922	0.000619018	0.0321259	38.7632	35.6458	40.2801	38.8687	41.4441	37.8616	33.698	32.2728	34.1718	31.8836	36.1145	36.7473
	ENSMUSG00000027829.16	Ccnl1	0.181073	6.63198	13.4865	0.00119983	0.0432386	97.6286	107.947	96.7369	105.071	96.3885	102.748	85.1653	92.9247	79.6108	84.9639	91.9926	100.203
	ENSMUSG00000025969.16	Nrp2	0.174161	6.46195	13.0044	0.00141526	0.0470816	93.0173	99.7488	91.3177	97.7309	94.2836	85.8829	83.891	81.1111	84.0583	86.907	88.8645	73.4947
	ENSMUSG00000042364.12	Snx18	0.171595	6.1967	16.2652	0.000484494	0.028761	75.2208	79.8466	75.9498	80.4637	79.477	87.1698	67.6084	67.9116	71.9758	71.8042	68.1058	77.1568
	ENSMUSG00000019132.12	BC005537	0.166236	8.1	15.566	0.000604553	0.0317555	275.81	281.958	271.85	288.439	271.02	267.673	246.505	254.421	221.339	225.393	257.707	270.806
	ENSMUSG00000048970.10	C1galt1c1	0.165732	5.0192	17.3183	0.000349876	0.0251649	34.8004	33.5665	30.0079	31.4585	34.6215	32.7818	28.884	28.445	29.6502	30.1171	29.4319	29.4231
	ENSMUSG00000060657.9	Marf1	0.165533	6.4436	14.4088	0.000880739	0.0376956	89.1266	97.4912	91.1559	95.8434	92.832	87.9826	82.6875	81.9031	74.3478	78.075	88.2958	88.9008
	ENSMUSG00000064373.14	Selenop	0.16465	9.97954	14.7172	0.000795725	0.0367816	981.834	1028.2	1109.64	1059.45	1070	972.753	900.218	972.211	881.945	875.517	913.456	1007.14
	ENSMUSG00000021973.10	Micu2	0.164309	5.59617	14.2353	0.000932883	0.038184	51.5162	49.1912	48.0449	48.7956	48.4846	52.9657	47.4321	46.3303	42.8445	42.9236	43.7924	43.4402
	ENSMUSG00000022884.17	Eif4a2	0.16327	8.75474	21.1871	0.000113904	0.0131398	455.432	457.93	449.39	453.561	450.95	422.98	392.695	416.445	391.234	372.446	404.085	425.246
	ENSMUSG00000027506.16	Tpd52	0.161558	6.17299	13.3528	0.00125574	0.0444996	70.3934	77.1137	73.5233	71.0262	72.6543	73.285	67.6792	67.5156	65.5269	58.3796	65.973	66.3599
	ENSMUSG00000029390.14	Tmed2	0.157396	7.71378	13.2366	0.00130665	0.045088	211.901	227.777	199.378	219.44	202.14	202.177	184.489	196.673	190.725	169.84	188.322	202.11
	ENSMUSG00000001280.14	Sp1	0.155641	6.75544	14.1485	0.000960211	0.0384395	113.191	115.195	112.186	109.755	113.082	110.198	98.1914	104.276	89.0988	96.5339	103.581	112.831
	ENSMUSG00000053012.18	Krcc1	0.154749	5.76123	14.3991	0.000883559	0.0377232	54.6864	56.0827	56.2142	57.1845	55.525	54.0493	51.5381	53.0621	50.3312	46.1914	47.2759	51.2063
	ENSMUSG00000020570.16	Sypl	0.142959	7.27858	14.4322	0.000873931	0.0376901	155.557	170.862	167.106	169.456	156.196	146.841	144.703	142.885	144.026	142.902	148.084	152.23
	ENSMUSG00000038646.14	Ramac	0.137472	5.51108	14.8816	0.000754081	0.0358483	46.4006	46.8148	46.4273	49.2849	49.2104	46.6667	44.2463	43.9544	42.9928	41.1572	42.5128	43.9453
	ENSMUSG00000034042.17	Gpbp1l1	0.133741	6.09814	14.3135	0.000908964	0.0378938	73.7798	67.7864	72.1483	70.8864	73.6704	72.1335	65.5553	64.8757	67.4542	61.3825	63.5559	69.2643
	ENSMUSG00000020585.6	Laptm4a	0.119714	9.08806	13.9252	0.00103462	0.0400314	514.657	510.329	514.259	530.879	516.128	500.939	469.931	486.205	474.255	446.635	477.522	486.618
	ENSMUSG00000037791.16	Phf12	-0.124049	6.39511	14.0163	0.00100354	0.0394454	76.2295	78.2425	83.9573	82.7008	83.1786	83.6478	88.2803	86.4569	89.8401	88.85	88.5091	89.7847
	ENSMUSG00000053838.15	Nudcd3	-0.127272	6.57582	15.4794	0.000621563	0.0321617	86.9651	94.2831	90.6706	93.1869	90.1465	88.118	98.7578	100.382	101.404	100.332	93.5566	99.1294
	ENSMUSG00000020198.9	Ap3d1	-0.127498	7.15164	14.105	0.000974238	0.0388103	138.842	136.345	132.973	138.697	138.268	135.733	147.252	146.383	147.88	157.828	154.838	142.696
	ENSMUSG00000062234.15	Gak	-0.131654	6.92758	13.6031	0.0011533	0.0423544	122.054	110.324	121.973	116.746	115.84	119.003	130.403	127.309	130.09	128.947	135.358	121.228
	ENSMUSG00000039176.18	Polg	-0.134965	6.39846	15.3353	0.000650993	0.0326136	80.9849	78.1831	79.8322	83.3999	83.4689	79.3807	88.4218	87.2489	88.6541	90.2631	91.1395	87.1329
	ENSMUSG00000028465.17	Tln1	-0.137022	8.90992	13.5146	0.00118845	0.0430396	463.934	422.997	467.023	457.965	458.499	478.452	477.931	482.641	541.338	516.319	502.689	501.835
	ENSMUSG00000039703.17	Nploc4	-0.137157	6.21988	13.8103	0.00107537	0.0406997	67.3673	74.9156	69.1556	72.9836	68.2268	72.5399	73.6259	74.5113	80.0555	81.6078	78.2719	79.7455
	ENSMUSG00000001924.16	Uba1	-0.138237	8.00022	14.1381	0.000963548	0.0384842	240.505	244.174	233.43	243.838	237.342	237.329	248.912	254.751	279.898	279.975	259.911	257.863
	ENSMUSG00000024949.18	Sf1	-0.141739	7.96293	15.7878	0.00056329	0.0306536	228.833	237.104	247.909	247.963	236.036	228.999	256.204	262.539	265.517	268.935	275.125	245.866
	ENSMUSG00000042520.17	Ubap2l	-0.146077	7.32903	16.1062	0.000509316	0.0294943	162.042	155.713	147.451	159.459	152.93	150.837	165.941	165.588	176.641	169.928	180.644	168.709
	ENSMUSG00000056692.14	Ilrun	-0.146936	7.92658	14.5689	0.00083543	0.0375164	208.947	218.509	218.952	233.841	225.656	225.273	228.099	232.642	252.842	266.02	248.821	245.677
	ENSMUSG00000045078.13	Rnf216	-0.149328	5.99693	12.8713	0.00148192	0.0487916	60.1623	59.7661	58.8833	62.9169	56.396	59.2646	67.8916	63.1597	67.6766	65.7985	62.2763	69.58
	ENSMUSG00000004789.11	Dlst	-0.149485	7.02929	12.8684	0.0014834	0.0487916	116.722	119.354	124.318	122.758	129.558	129.366	149.376	131.005	138.615	141.754	136.496	125.964
	ENSMUSG00000022185.20	Acin1	-0.150707	7.50528	14.4252	0.000875961	0.0376901	171.048	175.318	170.018	182.319	177.898	178.878	192.702	190.601	195.765	204.991	204.744	183.105
	ENSMUSG00000027255.15	Arfgap2	-0.151155	6.35282	23.1912	6.63036e-05	0.00922142	75.5811	75.9849	78.0528	78.9258	82.1625	75.8587	87.9971	83.355	85.9114	88.4084	85.8787	86.5646
	ENSMUSG00000030816.9	Rnf40	-0.151474	6.34142	13.8457	0.00106263	0.0405719	72.8432	73.7274	76.1925	72.9137	80.6383	85.2733	84.3866	82.2991	87.3939	88.6734	85.1678	84.8598
	ENSMUSG00000031865.17	Dctn1	-0.151653	7.43066	16.3669	0.0004693	0.0285426	160.961	157.673	172.282	168.058	169.043	171.495	179.746	175.554	192.43	198.19	180.928	183.547
	ENSMUSG00000025162.19	Csnk1d	-0.152027	7.52459	18.5971	0.000238507	0.020178	166.509	179.358	169.937	180.432	164.107	180.842	191.073	184.265	195.839	198.102	197.635	190.177
	ENSMUSG00000005103.13	Wdr1	-0.152398	7.72194	14.3691	0.000892371	0.0377484	186.755	208.468	187.327	205.389	197.64	212.946	214.719	216.538	231.123	230.427	224.863	214.675
	ENSMUSG00000033161.11	Atp1a1	-0.15298	9.14824	14.9168	0.000745481	0.0357512	515.234	565.283	528.252	526.894	530.5	522.409	591.485	594.375	620.801	584.679	608.118	545.969
	ENSMUSG00000018707.14	Dync1h1	-0.154225	8.24062	16.6915	0.000424194	0.0274365	279.7	287.899	283.659	270.473	267.101	279.797	292.238	289.334	318.814	344.183	299.225	313.363
	ENSMUSG00000068917.13	Clk2	-0.154334	6.02865	13.9348	0.00103132	0.0400314	62.2517	58.8156	64.707	63.616	60.5331	64.6154	69.7322	62.1698	68.1213	75.7786	70.0253	71.0954
	ENSMUSG00000025332.15	Kdm5c	-0.154526	6.63716	14.3454	0.000899394	0.0377484	93.5217	95.5901	94.8766	96.1231	92.4691	93.4688	100.032	105.002	102.441	105.719	106.851	109.989
	ENSMUSG00000020476.15	Dbnl	-0.155213	6.80545	15.6255	0.000593176	0.0314438	98.3491	101.472	101.186	101.786	97.2595	99.6323	100.032	113.912	120.825	116.141	113.249	103.802
	ENSMUSG00000054808.16	Actn4	-0.155287	8.76456	19.7187	0.00017218	0.0168619	390.514	423.472	393.095	411.337	400.288	418.239	438.428	432.153	471.883	473.749	452.996	444.946
	ENSMUSG00000024050.19	Wiz	-0.156611	6.40664	13.0506	0.0013929	0.0466951	74.5724	77.7672	85.6559	81.023	81.2189	86.2216	87.1476	86.3909	97.3267	90.7047	88.5802	92.0578
	ENSMUSG00000024851.15	Pitpnm1	-0.157335	6.17219	14.9244	0.000743646	0.0357512	67.4394	67.5488	67.6997	69.0688	65.3235	71.9981	73.4135	75.8973	76.8681	82.3143	75.6415	72.295
	ENSMUSG00000019590.17	Cyb561	-0.159362	7.02823	13.8148	0.00107372	0.0406997	118.595	116.027	127.311	125.275	125.203	114.533	140.526	134.305	138.837	138.574	136.922	122.681
	ENSMUSG00000052296.8	Ppp6r1	-0.160493	7.27223	17.1663	0.000366504	0.0258251	155.269	142.464	152.223	155.055	147.123	151.921	166.154	167.898	168.858	183.176	171.971	152.546
	ENSMUSG00000029505.18	Ep400	-0.162573	6.56953	13.8596	0.0010577	0.0405621	94.026	84.8964	90.1045	92.0684	82.3802	95.5007	94.8641	98.5345	99.4764	106.956	105.358	98.1823
	ENSMUSG00000015143.16	Actn1	-0.16284	7.50471	19.6099	0.000177637	0.0170796	174.579	175.437	166.701	173.301	174.922	162.554	197.728	184.397	196.062	193.774	189.815	188.598
	ENSMUSG00000024002.19	Brd4	-0.163034	6.85412	16.2223	0.00049105	0.0288831	106.635	111.037	113.399	106.539	107.493	117.513	119.359	123.284	118.304	124.09	129.742	127.1
	ENSMUSG00000038762.16	Abcf1	-0.166221	6.47181	13.2657	0.00129369	0.0450298	75.7252	84.9558	79.0234	90.9499	78.8237	88.7276	88.2095	91.3407	99.6246	98.1236	93.3433	88.7114
	ENSMUSG00000001415.11	Smg5	-0.168898	6.2053	14.9157	0.000745739	0.0357512	67.7276	65.8853	72.7145	71.6554	64.9606	74.7073	79.2186	77.9432	79.2401	74.4538	74.3618	84.1022
	ENSMUSG00000034022.9	Cpsf1	-0.169263	6.28782	23.7805	5.68137e-05	0.0085002	77.3823	71.648	75.2219	76.0596	75.2672	76.1974	82.9707	82.2991	91.6932	82.5793	84.3858	84.039
	ENSMUSG00000033885.16	Pxk	-0.169321	6.27913	14.1565	0.000957654	0.0384395	67.6555	66.2418	68.2659	64.4549	66.1219	61.5675	68.3871	74.7753	79.3884	77.3684	73.8642	69.7063
	ENSMUSG00000031545.7	Gpat4	-0.169699	6.16347	15.4503	0.000627388	0.0322704	63.5486	67.7864	63.0084	73.6128	68.4445	68.5438	74.4754	71.3434	76.8681	83.5508	76.3524	73.2421
	ENSMUSG00000035569.18	Ankrd11	-0.170835	7.01976	26.8033	2.65269e-05	0.00587185	126.809	116.384	126.826	122.338	122.3	128.621	135.5	134.965	137.28	140.429	141.899	146.547
	ENSMUSG00000039844.21	Rapgef1	-0.171992	6.87431	14.867	0.000757688	0.0358846	114.705	115.671	108.142	107.378	108.074	118.665	131.535	111.47	131.276	128.152	125.05	130.51
	ENSMUSG00000000374.9	Trappc10	-0.173345	5.96747	13.0351	0.00140032	0.0467692	63.8368	57.7462	61.4716	63.1965	56.1782	61.432	66.6881	65.1397	66.1199	73.0407	70.4518	68.9486
	ENSMUSG00000003435.10	Supt5	-0.174078	7.15934	24.3671	4.88161e-05	0.0077631	133.87	133.375	137.664	140.514	136.526	133.227	145.623	156.018	156.479	163.745	152.634	145.348
	ENSMUSG00000002129.12	Sf3a1	-0.174133	6.07901	14.8479	0.000762415	0.0359983	65.8542	68.6776	59.6113	68.0901	64.0171	65.1572	70.9357	74.1813	78.8695	76.8385	71.5893	69.5169
	ENSMUSG00000026615.15	Eprs	-0.174399	6.17857	15.642	0.000590065	0.0314438	70.3214	68.2617	68.6703	68.7892	60.7509	67.5955	74.9002	77.3492	76.6457	76.3969	73.0822	77.9776
	ENSMUSG00000058301.9	Upf1	-0.175448	6.62271	13.6734	0.00112618	0.0417121	86.4607	95.6495	89.2956	99.7583	89.4206	96.449	100.528	97.7425	109.335	113.491	106.851	101.466
	ENSMUSG00000040712.17	Camta2	-0.175488	6.40763	15.9498	0.000535089	0.0298872	76.5898	84.4805	77.5675	83.0503	75.3398	82.6318	86.5812	90.2848	93.917	90.0865	88.7934	92.184
	ENSMUSG00000061689.16	Dlgap4	-0.176859	7.07451	14.4232	0.000876541	0.0376901	116.938	121.493	122.458	125.764	126.945	121.239	136.208	140.047	145.953	125.856	147.302	135.182
	ENSMUSG00000018921.12	Pelp1	-0.177293	5.0455	14.2452	0.000929803	0.038184	31.7743	30.0019	31.4638	33.7654	32.8795	30.8853	33.698	35.1767	39.5089	34.6215	38.3184	34.348
	ENSMUSG00000022521.11	Crebbp	-0.178126	5.97424	13.7306	0.00110465	0.0412671	55.0467	56.4986	60.5819	63.8956	59.4444	56.2845	65.0598	62.1038	63.3773	70.5677	66.4707	70.4008
	ENSMUSG00000032312.8	Csk	-0.178315	6.68299	17.9756	0.000286871	0.022366	92.9453	97.5506	94.3104	103.953	94.7917	103.358	99.6073	111.404	110.373	120.557	111.614	110.81
	ENSMUSG00000004530.13	Coro1c	-0.178668	7.44869	26.4703	2.87797e-05	0.00615886	156.206	169.496	162.172	165.821	163.817	162.893	175.145	180.636	197.1	183.441	188.251	185.189
	ENSMUSG00000005621.12	Zfp592	-0.178831	6.2473	13.8514	0.0010606	0.0405719	66.3586	67.43	67.2144	75.71	75.7753	72.6754	86.8644	75.6993	74.6443	83.7274	85.6654	74.8206
	ENSMUSG00000071054.13	Safb	-0.18041	6.83668	17.9364	0.000290259	0.022366	103.393	111.571	110.164	112.342	112.066	107.218	122.828	119.456	121.64	130.36	126.33	123.754
	ENSMUSG00000029599.14	Ddx54	-0.180523	6.07016	14.215	0.000939193	0.0383058	58.1448	58.1026	63.8981	69.0688	60.6057	64.7508	68.5995	65.9976	72.7171	76.3969	73.4377	67.4964
	ENSMUSG00000022568.18	Scrib	-0.182161	6.09787	15.0701	0.000709233	0.0348267	62.3238	64.2812	64.707	67.6007	63.0735	67.731	71.7144	69.8915	69.3814	81.6078	76.4946	73.3053
	ENSMUSG00000004069.18	Dnaja3	-0.18239	5.59952	16.1588	0.000500957	0.0293365	42.0775	47.8842	44.3243	46.978	46.162	42.806	49.9098	48.5083	52.7032	49.5476	51.3282	54.679
	ENSMUSG00000007029.17	Vars	-0.18241	6.57307	14.627	0.000819604	0.0374855	86.2446	84.5399	92.1265	84.6582	86.2271	83.6478	95.5721	105.464	104.22	98.2119	100.168	83.5339
	ENSMUSG00000079487.12	Med12	-0.18285	6.06593	20.3441	0.000144136	0.0152599	68.5922	60.479	66.4864	63.0567	59.0815	62.0416	72.8471	70.8155	74.0513	75.5137	70.2385	67.6227
	ENSMUSG00000026048.17	Ercc5	-0.184354	5.2414	16.5853	0.000438411	0.0277351	37.3943	35.0517	35.5079	36.6316	36.0731	33.6623	40.6358	38.8066	43.2893	40.3623	40.8066	39.6518
	ENSMUSG00000035754.9	Wdr18	-0.185612	5.12536	22.3756	8.23866e-05	0.0108189	33.1433	32.7941	32.1917	34.045	32.0811	31.224	36.5298	37.8166	40.9173	37.1828	35.688	34.2849
	ENSMUSG00000034235.18	Usp54	-0.187045	6.0471	15.9457	0.000535785	0.0298872	64.3412	59.5285	60.4201	60.3303	63.7267	50.866	69.5198	66.5916	71.9017	65.0919	69.812	65.9179
	ENSMUSG00000036966.16	Spryd3	-0.187661	5.78591	14.1868	0.000948043	0.0384395	50.6516	51.0329	55.5671	55.9261	52.3314	51.1369	58.0512	58.6719	69.3073	61.9124	57.0155	55.7524
	ENSMUSG00000017478.16	Zc3h18	-0.188095	6.05242	20.5336	0.00013665	0.0148043	65.6381	59.8255	63.1702	64.1053	63.0009	59.9419	69.2366	70.5515	68.5661	75.7786	69.5987	74.2524
	ENSMUSG00000024807.19	Syvn1	-0.189339	6.45765	14.7034	0.000799329	0.0368143	70.7537	82.8171	74.1704	83.1202	81.6544	78.297	85.8025	86.0609	95.8442	91.8529	92.0637	85.4912
	ENSMUSG00000024560.8	Cxxc1	-0.189544	6.31822	17.2444	0.000357851	0.0254221	73.996	74.4403	72.9571	81.9318	77.0092	71.9303	80.5637	84.411	86.8009	94.0609	86.8029	83.3445
	ENSMUSG00000027936.19	Crtc2	-0.18967	6.25558	13.0453	0.00139541	0.0466951	61.9635	68.0835	75.3836	77.8073	72.7994	74.0977	81.1301	74.9073	82.8723	87.7902	82.9639	81.0083
	ENSMUSG00000043683.5	Fem1a	-0.189898	5.94072	24.0414	5.30943e-05	0.00821729	55.8392	56.3798	57.4274	59.0021	58.5734	60.2129	65.6261	64.9417	65.008	66.77	66.5418	67.4333
	ENSMUSG00000052533.15	Nup188	-0.190344	5.06401	18.6419	0.000235382	0.0200991	32.8551	31.4277	32.1108	31.808	31.7182	32.8495	37.1669	32.8668	37.2851	40.7156	35.9724	36.1791
	ENSMUSG00000035048.14	Anapc13	-0.190961	4.53235	14.4631	0.000865063	0.0376901	20.6065	23.348	21.5151	21.4617	22.9358	22.2835	26.0522	24.6171	25.5733	26.9376	26.2328	21.7201
	ENSMUSG00000028433.15	Ubap2	-0.19152	6.06645	24.9326	4.2251e-05	0.00725127	63.6207	63.0336	64.707	66.8317	64.888	62.3125	72.4224	73.3894	73.3842	72.0692	79.6937	69.138
	ENSMUSG00000020823.17	Sec14l1	-0.192589	7.94946	24.4776	4.74512e-05	0.00768709	230.778	236.094	229.952	240.552	235.02	218.5	265.478	249.273	259.736	272.821	280.954	261.399
	ENSMUSG00000040463.17	Mybbp1a	-0.193136	6.44102	19.2952	0.00019451	0.0181271	89.0545	79.3119	78.0528	83.6795	69.4607	79.9226	90.5457	89.6908	96.882	92.9127	91.0684	87.196
	ENSMUSG00000049807.17	Arhgap23	-0.193485	6.95671	14.0861	0.000980395	0.0388103	110.814	108.363	113.399	118.983	119.397	118.055	123.253	123.68	135.427	134.688	128.463	142.38
	ENSMUSG00000033323.15	Ctdp1	-0.193762	5.09609	13.948	0.00102677	0.0399977	29.8289	28.7543	31.8682	32.5071	31.2827	33.3914	35.751	35.5067	35.8767	36.7412	34.7638	35.9265
	ENSMUSG00000040043.18	Rbms2	-0.194115	5.65902	17.9471	0.000289328	0.022366	46.5447	44.2008	44.0007	42.2941	44.5652	41.9932	51.5381	49.8282	45.2907	53.6103	53.0344	48.3651
	ENSMUSG00000063550.9	Nup98	-0.194462	6.17071	16.6635	0.000427894	0.0275729	71.1139	64.0436	63.4937	67.6007	62.7106	61.9061	77.9443	75.0393	80.7968	68.713	75.0017	69.7063
	ENSMUSG00000030739.19	Myh14	-0.194653	8.5822	20.7973	0.000126926	0.0139249	378.266	368.993	390.102	350.098	359.497	344.074	415.207	404.434	425.11	418.461	406.502	437.748
	ENSMUSG00000023991.17	Foxp4	-0.194761	6.60738	14.823	0.000768645	0.0361076	85.7402	96.303	88.9721	90.1809	92.5417	97.194	98.8286	102.362	116.08	104.924	105.713	102.855
	ENSMUSG00000028796.18	Phc2	-0.19515	7.23159	17.9236	0.00029137	0.022366	131.781	132.424	125.208	129.399	138.123	141.761	145.128	143.941	166.189	151.027	146.662	161.512
	ENSMUSG00000109336.2	Samd4b	-0.196352	6.70522	14.2006	0.000943689	0.0383988	84.2992	95.6495	100.053	104.792	97.4772	101.867	105.271	107.114	114.005	121.617	113.604	107.906
	ENSMUSG00000020454.18	Eif4enif1	-0.197813	6.09251	15.3553	0.000646835	0.0325937	66.935	61.6672	63.979	70.1873	59.517	56.4199	75.4665	70.1555	73.0136	73.7473	71.5893	70.4008
	ENSMUSG00000027575.20	Arfgap1	-0.198776	5.65644	19.0104	0.000211293	0.0187988	49.4267	41.8838	46.7508	47.4673	50.5894	44.8379	50.901	52.3361	54.7046	56.6132	54.2429	53.6057
	ENSMUSG00000046556.8	Zfp319	-0.199844	6.03506	14.1559	0.00095785	0.0384395	56.6318	64.2218	57.4274	69.9077	57.8476	56.9618	65.9093	64.4797	66.5647	78.075	70.7362	71.5373
	ENSMUSG00000038406.18	Scaf1	-0.200789	7.12318	15.5222	0.000613084	0.0320096	119.388	123.631	135.157	135.062	134.204	140.542	139.252	142.423	154.329	161.714	156.117	151.914
	ENSMUSG00000020262.16	Adarb1	-0.202898	6.40981	15.042	0.000715728	0.0349477	80.6246	71.8857	82.5014	87.0351	78.9689	80.9386	93.0943	91.0107	92.6568	90.793	90.4996	96.4776
	ENSMUSG00000024862.17	Klc2	-0.203812	5.12572	14.9797	0.000730369	0.035435	29.973	31.6059	33.0814	37.121	33.315	30.1403	37.3793	36.3647	39.2865	37.4477	38.5317	35.8634
	ENSMUSG00000021009.16	Ptpn21	-0.206128	5.63878	16.3247	0.000475537	0.0285426	48.0577	47.1119	47.4787	44.9506	42.8958	41.4514	52.4584	51.6102	46.9955	54.2285	56.8022	51.6483
	ENSMUSG00000037275.15	Gemin5	-0.20722	4.24	17.5256	0.000328517	0.0240275	18.7332	19.1299	18.5224	18.176	17.8551	16.9328	20.0347	21.2512	22.46	22.7866	19.2658	20.5836
	ENSMUSG00000024182.18	Axin1	-0.207992	5.99503	14.2316	0.000934003	0.038184	55.0467	56.4392	59.8539	65.2938	56.3234	61.6352	67.4668	62.8957	75.1632	72.1575	69.6698	62.4452
	ENSMUSG00000001910.6	Nacc1	-0.208144	6.8802	19.8016	0.000168138	0.0166543	110.454	114.304	108.465	116.746	106.695	105.457	115.465	122.558	138.022	139.722	127.396	122.049
	ENSMUSG00000025648.19	Pfkfb4	-0.208688	5.98647	16.7691	0.000414131	0.0271914	54.11	51.3299	54.5965	61.9382	60.3154	61.432	63.2191	62.7638	68.2696	68.0948	63.627	71.2216
	ENSMUSG00000033365.15	Ipo13	-0.209969	5.84055	15.4248	0.000632535	0.0323432	45.8962	56.9739	53.8686	52.5706	54.9443	52.5593	59.9626	55.24	63.5997	65.4452	63.4137	59.0988
	ENSMUSG00000022702.17	Hira	-0.210177	5.34404	17.7651	0.000305584	0.0230304	34.7284	36.7746	38.258	38.4492	39.6296	42.1287	43.5384	40.4566	41.4361	49.7242	44.1479	46.9128
	ENSMUSG00000037326.11	Capn15	-0.210344	5.85754	13.5819	0.00116159	0.0423896	50.7236	53.1122	52.7362	57.6738	54.1459	56.4877	58.4759	55.9	64.8598	68.1831	66.4707	62.2558
	ENSMUSG00000030037.10	Mrpl53	-0.214228	4.219	16.7988	0.00041034	0.027142	15.8511	17.0506	16.8238	16.1487	17.2744	16.0522	20.1055	19.8653	19.7915	19.7837	18.1995	17.4266
	ENSMUSG00000038611.18	Phrf1	-0.21588	6.21204	36.9259	2.81914e-06	0.00148082	69.0965	68.4399	70.5306	71.4457	69.0978	68.0019	77.5196	79.0652	80.5744	84.6106	83.2483	78.9247
	ENSMUSG00000000976.14	Heatr6	-0.215906	4.72562	16.1081	0.000509019	0.0294943	26.2985	24.0609	23.4563	27.6135	22.2826	24.1122	26.6894	28.841	28.3159	29.4989	30.1429	28.2866
	ENSMUSG00000041187.17	Prkd2	-0.217687	6.66048	13.3815	0.0012435	0.0443516	89.9191	94.1643	88.1632	95.7735	98.203	97.8036	98.8286	106.718	113.412	121.263	111.401	104.623
	ENSMUSG00000037992.17	Rara	-0.219026	6.35114	13.1377	0.00135176	0.0460383	63.7648	70.9945	73.8468	76.7586	79.114	83.6478	78.7231	82.1671	93.5463	91.4996	84.6701	91.1107
	ENSMUSG00000036180.16	Gatad2a	-0.220276	6.85604	24.9779	4.1768e-05	0.00724006	96.9801	112.938	94.1486	112.062	104.735	108.031	120.35	116.882	118.082	130.184	127.325	120.218
	ENSMUSG00000036057.12	Ptpn23	-0.220418	6.36343	27.772	2.09937e-05	0.00485929	72.9873	79.6683	72.7145	79.2753	77.6624	76.4006	83.7494	89.2948	89.3212	93.1777	92.4902	86.6277
	ENSMUSG00000053198.15	Prx	-0.220528	8.5038	15.0558	0.00071253	0.0348898	315.87	324.02	304.77	331.992	338.376	326.599	336.697	349.457	401.019	375.625	393.705	405.926
	ENSMUSG00000009293.18	Ube2g2	-0.22378	5.98234	13.0172	0.00140899	0.0469683	53.2454	65.2318	51.2803	67.3211	60.6783	56.3522	63.7147	63.0937	70.0486	74.5422	76.9922	65.6653
	ENSMUSG00000032185.16	Carm1	-0.224508	5.91352	25.257	3.89224e-05	0.00702793	53.2454	56.3798	54.6774	63.4762	52.1862	57.5714	64.2811	66.0636	66.194	68.6247	66.3285	63.0766
	ENSMUSG00000034974.14	Dapk3	-0.22469	4.99205	14.5603	0.000837803	0.0375258	29.2525	29.0513	28.3093	28.1029	27.073	30.7499	31.7158	33.1968	33.7271	40.0973	32.56	30.7491
	ENSMUSG00000057691.9	Zfp746	-0.225452	5.5804	28.789	1.65025e-05	0.00440083	44.4552	42.2403	43.839	48.5159	44.7103	46.5312	54.5115	49.9602	52.1843	54.9351	55.2382	49.3122
	ENSMUSG00000021285.16	Ppp1r13b	-0.225732	6.58826	16.3392	0.000473389	0.0285426	76.95	88.1639	87.0309	92.8374	95.953	87.5762	104.492	93.7826	100.44	110.135	110.334	99.0663
	ENSMUSG00000055652.15	Klhl25	-0.227095	5.07144	13.5631	0.00116903	0.0425712	30.3333	32.4971	30.2505	32.9964	30.194	37.2521	33.2024	34.5828	41.5103	42.482	34.8349	40.2832
	ENSMUSG00000032578.8	Cish	-0.227316	6.23791	16.4428	0.00045831	0.0281453	57.6405	71.7669	64.707	68.4396	69.2429	60.687	73.6967	78.1412	71.0863	76.1319	74.1486	86.2489
	ENSMUSG00000052488.8	Cherp	-0.229072	6.37243	25.5245	3.63918e-05	0.00702793	72.6991	71.7669	81.9352	84.5184	78.2431	78.0261	84.8113	88.5028	91.8415	102.716	91.566	88.2694
	ENSMUSG00000022793.18	B4galt4	-0.229407	5.79856	14.4221	0.000876854	0.0376901	47.9136	49.7853	46.1037	49.984	52.1862	49.7823	56.5645	54.646	63.5997	52.1088	62.3474	57.4572
	ENSMUSG00000075419.5	Dolk	-0.233811	4.24154	15.1028	0.000701759	0.0345576	17.076	14.7336	16.9856	16.9876	18.218	16.5941	20.7427	19.6673	18.6796	19.5187	19.1236	20.3941
	ENSMUSG00000031826.21	Usp10	-0.236134	5.67527	16.8057	0.000409474	0.027142	46.4006	50.0229	44.4052	54.2484	46.9604	46.5312	58.9007	56.23	57.4472	54.1402	57.6553	55.6261
	ENSMUSG00000027933.12	Ints3	-0.238546	5.90123	16.9011	0.000397595	0.0270396	58.361	61.9643	59.0451	59.5613	49.791	51.2046	60.9537	69.4295	67.8989	70.1261	69.9542	62.8872
	ENSMUSG00000022443.18	Myh9	-0.239295	9.50405	27.2393	2.3862e-05	0.00537173	665.603	714.401	624.746	680.831	635.453	700.813	735.834	778.97	818.938	804.243	799.639	810.083
	ENSMUSG00000025372.17	Baiap2	-0.239501	5.94157	14.3048	0.000911603	0.0378938	55.8392	49.5476	57.4274	52.8502	58.8638	58.6551	62.936	64.6117	73.3842	65.2685	67.0394	60.0459
	ENSMUSG00000041915.10	Ammecr1l	-0.240103	5.22663	13.3245	0.00126794	0.0446623	34.0079	33.6853	36.5594	35.3034	34.6941	29.1243	40.7774	36.9587	36.025	40.3623	41.9441	43.9453
	ENSMUSG00000017132.18	Cyth1	-0.24046	5.912	21.2502	0.000111937	0.0131102	51.4441	51.8646	51.9273	55.297	52.3314	65.1572	66.4049	67.6476	65.8234	66.505	62.9872	58.3411
	ENSMUSG00000017999.17	Ddx27	-0.240788	4.97694	28.8213	1.6378e-05	0.00440083	27.4513	29.5266	29.7652	29.3612	26.7826	30.5467	33.4148	31.9429	38.2487	32.5901	33.9107	34.8531
	ENSMUSG00000000916.16	Nsun5	-0.241993	4.29207	16.7873	0.000411812	0.027142	17.0039	19.1299	16.9047	19.9936	16.476	16.0522	21.2382	21.0532	21.5705	20.7552	20.5455	19.8259
	ENSMUSG00000020329.13	Polrmt	-0.242591	4.75383	23.8341	5.60274e-05	0.0085002	22.84	24.655	25.8828	26.9844	25.6213	26.5506	29.4504	27.851	31.6516	31.0887	30.7116	29.802
	ENSMUSG00000049907.9	Rasl11b	-0.243518	5.01423	14.6806	0.000805316	0.0369295	25.9382	27.0314	29.7652	29.0117	34.2586	30.4112	35.6802	38.2786	30.7621	33.9149	35.3325	34.6637
	ENSMUSG00000023170.15	Gps2	-0.24441	5.1672	16.113	0.000508231	0.0294943	30.9097	33.1506	28.552	35.1636	34.4037	33.2559	35.9634	36.8267	39.9536	45.0432	37.8207	36.4316
	ENSMUSG00000031848.16	Lsm4	-0.244762	4.56446	14.9735	0.000731841	0.035435	20.3903	20.2587	20.3018	22.4404	20.9035	23.909	22.5833	26.4651	27.4264	28.969	24.1001	22.6672
	ENSMUSG00000029111.8	Nelfa	-0.249108	4.97703	23.2868	6.46535e-05	0.00911141	27.9556	26.6749	32.1917	29.7108	28.5246	30.8176	32.6361	34.5828	37.0627	34.8864	33.6263	36.0528
	ENSMUSG00000030397.12	Mark4	-0.249286	5.90215	19.2374	0.000197795	0.0183124	49.2106	52.9934	50.1479	60.4701	52.5491	53.9139	60.1042	62.8957	66.9353	62.1773	64.5512	62.9503
	ENSMUSG00000047098.19	Rnf31	-0.250042	5.89486	17.9615	0.000288079	0.022366	44.167	47.1713	41.5742	41.9446	36.5086	41.3159	46.4409	53.3921	52.4808	52.2855	48.129	48.0494
	ENSMUSG00000027339.16	Rassf2	-0.252496	5.95269	13.7465	0.00109874	0.0412241	60.2343	64.2812	51.6847	58.5127	61.8396	57.0972	77.5903	76.3593	58.0402	71.3626	77.4188	60.8036
	ENSMUSG00000048807.3	Slc35e4	-0.258221	4.93219	13.086	0.00137601	0.0466576	22.768	24.5956	32.4344	27.7534	29.0327	30.6144	34.7599	34.1868	32.9117	31.6186	34.5505	31.633
	ENSMUSG00000037692.15	Ahdc1	-0.259514	5.73412	14.6153	0.000822762	0.0375164	43.0142	51.8052	51.2803	53.3396	48.412	54.1848	52.8832	56.56	63.822	63.5021	58.7928	66.1705
	ENSMUSG00000045092.9	S1pr1	-0.262328	8.78638	15.3944	0.000638754	0.0325652	333.666	426.621	387.352	416.929	398.038	325.244	470.71	482.773	436.08	425.614	465.65	463.193
	ENSMUSG00000029028.15	Lrrc47	-0.269405	5.75166	14.7804	0.000779432	0.0361602	46.1844	47.5871	50.5523	49.0752	46.9604	56.4877	54.5823	59.5299	61.1535	67.6532	60.6412	54.5528
	ENSMUSG00000024037.14	Wdr4	-0.272926	4.55768	15.9634	0.000532801	0.0298872	19.3816	21.5657	21.8386	21.951	21.4116	22.419	22.017	24.4191	26.9817	30.5587	26.2328	25.4453
	ENSMUSG00000030609.19	Aen	-0.27746	5.22064	19.0569	0.000208445	0.0187833	29.973	30.1207	29.4417	36.4918	29.9037	34.2719	36.2466	34.9787	38.0264	41.7754	39.4559	40.2832
	ENSMUSG00000004815.13	Dgkq	-0.277585	4.62512	13.3367	0.00126268	0.0445771	21.0388	20.8528	24.8313	21.6714	25.8391	22.5544	27.0434	26.795	26.4628	28.1741	30.4272	26.7713
	ENSMUSG00000030880.15	Polr3e	-0.281893	4.60744	20.0152	0.000158205	0.0161868	20.6785	22.3974	21.6768	24.7473	19.4519	20.7257	28.2469	24.6831	25.3509	25.7011	25.593	28.0972
	ENSMUSG00000045374.19	Wdr81	-0.282863	5.45853	20.0032	0.000158749	0.0161868	42.7981	37.6063	41.8169	35.0237	37.3796	42.8737	48.8479	44.2184	45.6613	50.1658	52.2523	47.7968
	ENSMUSG00000039244.11	Ints15	-0.286934	4.72447	19.0074	0.000211478	0.0187988	21.1829	25.7244	22.5666	26.0756	24.46	27.2956	30.0167	29.9629	31.3551	31.4419	28.721	28.5392
	ENSMUSG00000044534.9	Ackr2	-0.28745	5.85744	15.3606	0.000645724	0.0325937	48.1298	56.3203	47.964	55.7164	52.6217	42.1964	60.175	56.56	65.7493	66.8583	58.0819	62.6978
	ENSMUSG00000033453.9	Adamts15	-0.288676	6.11119	16.3545	0.00047113	0.0285426	66.2866	73.4897	60.5819	64.8044	58.4283	63.8026	86.4396	79.1312	95.4736	64.9153	67.6792	79.6192
	ENSMUSG00000041734.16	Kirrel	-0.289258	5.53186	26.0371	3.20267e-05	0.00653118	36.8179	42.5373	41.736	41.5951	42.3151	40.3	46.6533	44.4164	49.2193	51.8439	53.8164	53.9214
	ENSMUSG00000034412.14	Tbc1d10a	-0.291195	5.43552	29.3983	1.43195e-05	0.00420702	34.0079	41.8244	37.7727	39.7775	41.1538	38.8099	47.0781	45.8684	49.8123	51.1373	47.6314	44.3873
	ENSMUSG00000039738.17	Slx4	-0.293552	4.31959	19.8342	0.000166581	0.0166543	18.445	17.8229	16.662	19.714	18.9438	17.0682	22.8665	20.4593	23.2754	23.7581	23.6735	19.3839
	ENSMUSG00000024395.10	Lims2	-0.297279	6.98562	29.7054	1.33396e-05	0.00405665	103.249	124.76	115.259	109.545	108.002	102.883	131.111	134.173	145.064	129.919	137.42	137.96
	ENSMUSG00000075600.4	Zc3h3	-0.299477	4.72396	18.7231	0.000229826	0.0198145	22.6959	22.4568	24.346	26.8446	23.5165	22.2835	26.6894	29.9629	31.874	31.0003	30.1429	25.3822
	ENSMUSG00000021457.15	Syk	-0.303186	6.16659	16.2191	0.000491549	0.0288831	69.817	60.3602	55.0009	65.2239	58.8638	75.2492	81.7672	85.5989	72.4947	76.4852	82.4663	75.7046
	ENSMUSG00000024561.12	Mbd1	-0.305682	6.683	23.6779	5.83549e-05	0.0085002	83.8669	80.5001	88.4059	101.925	84.848	88.1858	110.156	112.13	109.261	101.215	110.263	109.042
	ENSMUSG00000074259.11	Gramd2	-0.307051	7.64875	47.1171	4.23341e-07	0.000407677	172.489	179.595	175.032	190.918	190.672	172.985	224.205	220.366	210.294	249.681	224.223	209.75
	ENSMUSG00000042303.20	Sgsm3	-0.307053	5.21088	21.6661	9.98536e-05	0.0123633	29.5407	31.6059	33.7285	32.4372	38.8312	31.969	40.7066	39.5986	41.5844	45.2199	41.8019	36.3685
	ENSMUSG00000004100.13	Ppan	-0.308473	4.57057	16.5958	0.000436981	0.0277351	19.958	22.3974	17.7944	21.3218	18.4358	22.148	26.3354	24.6171	22.5341	31.0003	24.2422	23.046
	ENSMUSG00000034471.13	Caskin2	-0.308705	7.93981	16.0273	0.000522149	0.0295782	195.906	240.193	198.893	240.902	206.35	219.448	251.815	241.089	296.576	275.824	262.826	284.571
	ENSMUSG00000025959.14	Klf7	-0.309708	6.77157	16.078	0.000513862	0.0294943	90.3515	97.4912	92.4501	111.573	83.8319	79.3807	106.474	118.862	105.184	102.893	135.145	119.271
	ENSMUSG00000062127.12	Cttnbp2nl	-0.310824	7.50175	35.7088	3.61294e-06	0.00184196	156.062	151.495	147.775	156.523	153.147	145.486	181.091	191.591	169.673	170.634	205.81	210.319
	ENSMUSG00000039834.18	Zfp335	-0.314522	5.27289	29.2889	1.46871e-05	0.00424311	34.0079	31.7248	38.1771	36.6316	35.565	36.9134	41.4853	41.6445	47.6627	48.1344	42.3706	43.6296
	ENSMUSG00000040451.19	Sgms1	-0.3187	6.67733	42.0065	1.05488e-06	0.000803025	90.7117	81.2724	92.6119	82.8406	87.3158	80.9386	112.846	107.048	111.929	94.2375	109.055	107.653
	ENSMUSG00000020527.15	Myo19	-0.318707	3.05552	13.6476	0.00113604	0.0418982	6.2684	7.90148	6.79423	6.78105	6.89526	8.60184	9.41562	9.10767	8.07968	10.1568	9.09973	8.27131
	ENSMUSG00000044456.17	Rin3	-0.319543	6.92549	21.1428	0.000115309	0.0131398	107.644	115.611	93.6633	119.542	108.655	111.282	120.704	131.863	150.919	146.17	138.984	131.015
	ENSMUSG00000041623.18	D11Wsu47e	-0.320449	3.46854	15.7314	0.000573491	0.0309685	9.65478	9.44613	8.65456	10.2764	9.29046	11.1756	13.2385	12.0116	13.3426	11.1283	12.0856	11.302
	ENSMUSG00000031770.17	Herpud1	-0.320847	7.46275	17.5836	0.000322793	0.0237089	137.833	158.148	156.348	158.341	158.083	137.426	214.648	197.267	185.758	175.934	204.602	153.682
	ENSMUSG00000038145.18	Snrk	-0.321689	7.65683	46.3808	4.80815e-07	0.000438655	166.653	157.079	174.709	177.076	180.946	174.407	213.303	211.456	195.988	227.866	219.744	219.979
	ENSMUSG00000023988.9	Bysl	-0.322302	4.61737	21.3697	0.000108312	0.0128594	21.7593	23.2292	18.5224	23.6288	22.6455	20.5225	25.0611	25.0131	29.2054	30.7354	25.9484	27.4027
	ENSMUSG00000061458.10	Nol10	-0.324915	3.85787	15.6849	0.000582034	0.031266	13.6896	12.8919	11.809	12.5135	11.8308	11.5143	13.8049	16.8954	18.309	14.7495	13.0809	16.1638
	ENSMUSG00000022528.9	Hes1	-0.325849	5.95822	25.3875	3.76648e-05	0.00702793	49.3547	51.9834	51.9273	53.9687	52.9846	52.1529	60.9537	55.24	64.4892	70.0378	67.1105	73.8104
	ENSMUSG00000097944.3	A130014A01Rik	-0.326625	2.97507	14.38	0.000889174	0.0377484	6.05225	6.7727	8.08837	7.55003	6.89526	6.63764	8.21212	9.76765	8.74681	9.09697	9.313	7.51363
	ENSMUSG00000039942.16	Ptger4	-0.33153	3.36605	12.9171	0.00145857	0.0482496	10.3032	9.68377	8.97809	8.38892	6.82268	10.0919	9.69879	12.3416	10.4517	12.6298	12.6543	10.6706
	ENSMUSG00000024137.10	E4f1	-0.332122	5.13269	25.1651	3.98352e-05	0.00709256	28.0277	26.3779	31.1402	31.5983	32.6618	34.1364	36.105	36.4967	40.9173	43.4535	38.7449	35.9897
	ENSMUSG00000026773.20	Pfkfb3	-0.333203	6.94479	13.9929	0.00101144	0.039666	92.0086	89.5303	108.627	92.5578	107.348	90.7596	149.092	139.651	97.6974	110.223	126.33	108.222
	ENSMUSG00000022091.7	Sorbs3	-0.333258	8.01037	25.2579	3.89134e-05	0.00702793	203.111	235.025	220.57	244.747	226.31	197.842	294.574	275.276	307.695	261.692	271.072	262.346
	ENSMUSG00000004947.16	Dtx2	-0.335015	4.53124	26.1586	3.10777e-05	0.0064131	17.7244	19.6646	21.1106	20.2732	21.339	22.4867	27.1849	23.0332	24.1649	28.704	28.1523	23.6143
	ENSMUSG00000022557.12	Bop1	-0.336472	5.17336	27.2853	2.35984e-05	0.00537173	29.6128	34.3388	27.9049	33.6256	30.4117	33.8655	36.1758	36.8267	45.1424	43.5418	42.2284	36.3054
	ENSMUSG00000031217.9	Efnb1	-0.336864	7.4753	29.4807	1.40491e-05	0.00419874	138.697	156.96	143.569	162.605	155.47	159.574	183.923	184.859	204.29	177.877	202.042	205.078
	ENSMUSG00000041598.8	Cdc42ep4	-0.338098	7.58369	30.0675	1.22769e-05	0.00389328	132.645	156.485	151.9	170.505	173.325	169.802	192.489	201.095	221.487	188.917	208.512	194.344
	ENSMUSG00000030203.18	Dusp16	-0.34125	6.04446	26.7673	2.6761e-05	0.00587185	57.7125	63.6277	49.9053	59.4215	51.8233	48.4277	68.8827	67.8456	64.1927	69.2429	74.8595	74.4418
	ENSMUSG00000047040.10	Prr15l	-0.343115	6.28012	23.4375	6.21431e-05	0.00888837	65.566	62.0831	60.8246	61.5188	67.7913	63.464	92.8111	87.5129	86.3562	69.2429	80.1203	67.4333
	ENSMUSG00000015202.14	Cnksr3	-0.343717	4.48292	21.4273	0.000106609	0.0127446	19.7419	17.4664	19.8974	22.3006	19.1616	18.8292	22.3709	23.0332	24.239	23.7581	31.1381	24.3088
	ENSMUSG00000048677.10	Tpcn2	-0.34573	4.61329	25.0235	4.12881e-05	0.00722917	21.5431	24.4768	21.2724	21.1121	21.1213	19.3711	26.1938	26.597	28.4642	28.2624	30.1429	24.4351
	ENSMUSG00000024052.18	Lpin2	-0.351508	7.4984	61.1085	4.72989e-08	8.19879e-05	146.767	149.594	146.076	142.542	159.897	136.952	198.931	188.225	189.909	169.398	196.284	182.221
	ENSMUSG00000048387.9	Osr1	-0.356147	3.85155	20.5014	0.00013789	0.0148458	12.5368	13.4266	15.3679	14.7505	11.6857	12.1916	17.6277	16.8954	18.9761	15.721	17.7729	15.2798
	ENSMUSG00000020387.16	Jade2	-0.356728	6.34453	21.1465	0.00011519	0.0131398	73.7798	71.1728	63.8981	75.1508	72.5091	56.4199	93.6606	89.9548	83.317	90.8814	89.7176	81.3871
	ENSMUSG00000022469.18	Rapgef3	-0.358823	6.3503	16.8865	0.00039939	0.0270396	58.2889	68.6181	67.6188	82.0017	64.6703	64.6154	81.2008	78.4712	87.1716	90.6164	93.3433	89.7847
	ENSMUSG00000032724.6	Abtb2	-0.360308	3.80246	22.5517	7.85854e-05	0.0104841	11.8883	13.2484	9.78693	12.5834	12.3389	13.0044	13.9464	15.5094	16.1594	14.7495	15.2136	18.058
	ENSMUSG00000023915.6	Tnfrsf21	-0.361179	5.24549	24.3888	4.85449e-05	0.0077631	33.4315	30.893	33.6476	33.5557	33.7505	31.224	40.8482	46.0004	36.025	46.8096	42.4417	40.2832
	ENSMUSG00000026360.10	Rgs2	-0.364948	6.4143	14.4917	0.000856948	0.0376901	72.7711	55.3698	85.8176	63.8257	73.8156	70.5757	87.6431	97.5445	89.0988	76.6618	92.1348	99.6345
	ENSMUSG00000029570.6	Lfng	-0.369636	5.93163	22.5497	7.86281e-05	0.0104841	49.4988	53.8846	50.5523	66.9017	52.4766	62.8544	69.5198	70.2875	69.2332	86.5537	70.1674	69.138
	ENSMUSG00000026473.17	Glul	-0.370507	8.46652	17.0806	0.000376246	0.0262914	264.786	274.057	305.579	271.312	338.739	255.752	467.1	386.02	319.184	387.284	366.122	285.265
	ENSMUSG00000006567.12	Atp7b	-0.375447	5.6364	25.267	3.88248e-05	0.00702793	46.2565	41.0521	46.9126	45.5798	48.7023	35.6265	67.8208	54.3821	52.3326	57.3197	60.2857	50.3224
	ENSMUSG00000035095.12	Fam167a	-0.376196	4.89263	18.4755	0.000247219	0.0205038	29.8289	25.3085	28.2284	27.6135	27.0004	26.686	35.6094	42.7005	37.211	33.0317	39.0293	26.0136
	ENSMUSG00000029674.14	Limk1	-0.382227	4.98951	29.9617	1.25778e-05	0.00389328	28.8923	29.2295	24.7504	26.9844	26.4197	27.9729	31.1494	36.3647	36.3215	40.009	34.8349	35.8002
	ENSMUSG00000034271.17	Jdp2	-0.383605	5.14144	27.7859	2.0924e-05	0.00485929	27.1631	30.7148	29.199	35.4432	28.8149	29.463	40.7774	43.0305	39.2865	36.4762	39.8113	36.4948
	ENSMUSG00000016520.8	Lnx2	-0.385238	5.79174	25.139	4.00987e-05	0.00709256	42.0055	38.2598	45.1331	51.0326	55.9605	47.0053	58.6175	57.6819	56.113	56.0833	64.7645	71.1585
	ENSMUSG00000028121.9	Bcar3	-0.385773	5.84438	38.0307	2.26059e-06	0.00126404	46.977	43.0126	52.7362	48.0965	46.8878	49.7823	62.8652	61.8398	69.0108	56.3482	61.8497	63.3292
	ENSMUSG00000018334.19	Ksr1	-0.391988	5.21219	31.8083	8.30263e-06	0.00319817	34.4402	39.0916	30.1696	35.0937	29.9037	27.9729	39.6447	40.9185	46.0319	45.4848	42.7261	43.7559
	ENSMUSG00000030411.17	Nova2	-0.394911	5.44253	15.4944	0.00061857	0.0321259	31.6302	42.062	36.2359	41.3154	33.8231	34.5428	43.68	39.9946	52.1102	54.4935	47.9158	51.1432
	ENSMUSG00000022018.8	Rgcc	-0.405684	5.99502	14.234	0.000933286	0.038184	40.8527	47.8248	46.5081	47.2576	56.904	44.1606	80.4929	68.5715	59.8934	55.9949	64.5512	46.0289
	ENSMUSG00000046275.3	Trarg1	-0.412785	4.53336	20.2366	0.000148579	0.0156089	15.9952	15.5653	17.39	17.8964	20.3955	18.2874	25.7691	21.7132	23.2754	23.3165	24.5266	21.8464
	ENSMUSG00000049562.7	Ap5b1	-0.414566	2.99738	16.7324	0.000418863	0.0273141	6.98891	7.12916	6.06628	6.22178	5.51621	5.82487	7.78735	7.72172	8.67268	9.00865	9.52628	7.76619
	ENSMUSG00000034936.3	Arl4d	-0.417983	5.97263	17.9201	0.000291683	0.022366	47.1931	63.093	49.3391	52.0113	50.8798	46.3957	74.263	80.3191	66.6388	62.4423	63.6981	65.5391
	ENSMUSG00000020901.14	Pik3r5	-0.419165	4.90167	20.197	0.000150253	0.0156733	31.6302	27.2096	24.2651	31.3186	24.2423	27.2956	35.1139	41.1825	35.9509	40.6272	39.8113	29.6125
	ENSMUSG00000059013.13	Sh2d3c	-0.422105	7.02446	34.1064	5.04953e-06	0.00221484	89.775	97.6695	97.4649	120.171	119.179	116.43	146.048	146.779	143.581	136.013	149.079	136.95
	ENSMUSG00000052040.11	Klf13	-0.422908	7.74362	78.3236	5.03576e-09	1.54402e-05	179.766	167.535	183.04	174.28	200.398	187.344	233.975	245.313	242.242	244.647	259.2	238.984
	ENSMUSG00000091228.2	Gm20390	-0.424004	4.32172	18.5358	0.000242856	0.0202388	17.7244	15.0901	14.0738	18.2459	17.7825	18.4228	21.8754	22.3072	22.1635	20.4019	29.9296	19.3208
	ENSMUSG00000044026.4	Slc35g1	-0.432174	2.6421	13.9032	0.0010423	0.0400983	5.5479	5.46569	6.79423	6.08197	5.80654	4.60571	7.85815	9.63565	7.2643	6.80065	7.82008	6.75595
	ENSMUSG00000037759.7	Ptger2	-0.435367	3.24418	17.7206	0.000309709	0.0232214	9.65478	8.25794	8.97809	8.52874	6.38719	5.8926	12.1058	11.0876	11.8601	10.4218	8.74427	10.2286
	ENSMUSG00000001227.13	Sema6b	-0.443711	3.90348	14.7774	0.000780196	0.0361602	11.384	13.2484	12.537	12.7232	13.7905	10.7692	19.61	17.6214	16.0111	16.6925	17.1331	14.2696
	ENSMUSG00000035042.3	Ccl5	-0.460237	4.76864	13.1962	0.00132488	0.0453862	28.9643	27.5661	26.1254	26.9844	25.1858	26.5506	32.4237	44.9444	31.4292	45.2199	42.0862	26.3924
	ENSMUSG00000048188.7	Gm8181	-0.466739	1.83038	13.0587	0.00138902	0.0466951	3.60253	2.91107	2.42651	2.51668	2.7581	3.11563	3.25653	3.49787	4.52165	4.23936	3.69676	4.79862
	ENSMUSG00000045502.7	Hcar2	-0.468907	3.14278	13.2378	0.00130611	0.045088	6.4125	6.00037	6.55158	5.59261	8.20173	6.90856	7.85815	11.0216	10.3034	8.74369	9.81064	7.13479
	ENSMUSG00000022346.18	Myc	-0.483551	3.75148	14.5857	0.000830809	0.0375164	8.71812	9.32732	9.30163	8.73846	10.3066	11.4465	15.0791	16.3014	11.7118	14.3079	13.3652	10.2286
	ENSMUSG00000055491.15	Pprc1	-0.490084	5.47457	44.3687	6.85708e-07	0.000566003	32.2787	38.9727	33.1623	42.434	34.6215	34.3396	55.0778	47.0563	50.8501	50.2541	52.1813	48.0494
	ENSMUSG00000015053.15	Gata2	-0.502877	7.65341	96.776	6.74216e-10	5.84343e-06	149.073	158.624	157.076	171.623	174.196	162.284	229.302	229.738	238.61	225.658	233.038	222.315
	ENSMUSG00000040289.9	Hey1	-0.512686	6.31712	28.8969	1.6091e-05	0.00440083	53.5336	53.1716	60.9054	72.9137	77.3721	66.5119	88.705	82.431	80.6485	105.896	93.2722	97.5509
	ENSMUSG00000084796.3	Mir142hg	-0.515824	3.84978	14.2851	0.000917577	0.0379601	11.6001	11.9413	10.7575	11.395	8.78239	16.7973	14.1588	17.6214	20.8293	18.9888	17.9151	12.8805
	ENSMUSG00000038264.9	Sema7a	-0.517832	6.80332	58.986	6.43379e-08	0.000101385	83.7228	82.3418	81.9352	82.1415	100.38	87.2375	127.996	128.893	128.459	117.112	125.548	113.273
	ENSMUSG00000044231.4	Nhlrc1	-0.540615	2.72452	15.864	0.00054983	0.0302205	5.47585	6.47565	5.33832	5.94215	4.3549	3.58974	7.64576	7.58973	7.04192	8.39041	8.03335	6.81909
	ENSMUSG00000025316.17	Banp	-0.550542	4.61235	13.2489	0.00130117	0.045088	16.5716	27.4473	15.9341	28.3825	20.3229	14.1558	30.0875	28.709	32.7635	35.5047	29.1476	24.7508
	ENSMUSG00000037465.11	Klf10	-0.552951	5.84258	17.6517	0.000316222	0.0234247	41.4291	53.2905	40.7654	49.8442	39.8474	37.9971	52.8832	50.4222	58.3367	69.7729	59.6459	95.341
	ENSMUSG00000052373.15	Mpp3	-0.553488	2.67341	13.0758	0.00138083	0.0466576	4.68329	5.88156	4.04419	6.01206	4.42748	3.18336	6.08829	7.65573	6.52304	7.59553	5.82951	7.89247
	ENSMUSG00000020709.16	Adap2	-0.553685	3.94934	28.5355	1.75147e-05	0.00453133	12.0325	9.08968	9.70605	11.9542	12.9921	12.598	15.0791	16.4994	15.7146	19.6954	15.7823	17.6791
	ENSMUSG00000048756.12	Foxo3	-0.574212	6.65704	77.8234	5.34449e-09	1.54402e-05	75.2929	73.7868	74.4939	85.0077	84.848	80.329	115.465	111.602	115.043	117.466	131.306	114.536
	ENSMUSG00000036040.15	Adamtsl2	-0.576002	6.73158	20.4162	0.000141234	0.0151121	76.0854	83.0547	80.3984	76.8985	103.501	117.581	109.377	122.888	155.367	127.976	117.23	168.457
	ENSMUSG00000039903.19	Eva1c	-0.577263	3.7188	34.0493	5.11097e-06	0.00221484	8.86222	10.8126	11.4855	11.325	7.9114	9.48234	16.9198	16.8294	15.7887	13.1597	15.2136	11.4283
	ENSMUSG00000033863.3	Klf9	-0.581936	7.56222	40.6091	1.37133e-06	0.000837781	133.222	129.038	148.179	134.363	173.615	132.482	243.603	229.606	182.719	174.079	226.285	216.696
	ENSMUSG00000023067.15	Cdkn1a	-0.588385	6.91398	33.8093	5.37854e-06	0.00227394	80.9849	106.403	75.8689	81.5124	91.8884	89.134	137.411	141.961	139.949	118.702	135.145	117.882
	ENSMUSG00000007659.19	Bcl2l1	-0.590449	7.23573	55.1039	1.15382e-07	0.000153849	106.779	103.729	107.414	122.828	128.107	116.565	191.427	178.392	167.82	156.062	187.753	150.462
	ENSMUSG00000060402.9	Chst8	-0.604475	2.64901	22.3451	8.30652e-05	0.010826	5.692	3.20812	4.93391	6.78105	5.87912	4.8089	7.71656	8.4477	8.82093	6.09409	8.24663	8.01875
	ENSMUSG00000037202.7	Prf1	-0.66482	3.15407	17.9177	0.000291885	0.022366	7.56531	5.5251	4.93391	7.89957	8.49206	8.94049	10.1236	11.9456	11.4153	13.513	11.5879	10.3549
	ENSMUSG00000024222.18	Fkbp5	-0.674822	4.80369	17.9518	0.000288925	0.022366	23.9928	26.5561	19.0886	23.2094	21.4116	18.2874	42.972	36.8267	29.7243	38.5959	42.1573	22.0989
	ENSMUSG00000118157.2	Gm9902	-0.677486	0.709027	16.0887	0.000512129	0.0294943	1.08076	1.18819	1.05149	1.60788	1.30647	0.745041	1.55747	1.71594	1.70489	2.11968	2.5593	1.57849
	ENSMUSG00000030087.12	Klf15	-0.692845	5.7834	23.1801	6.64981e-05	0.00922142	34.5843	38.3786	41.8978	46.209	53.0572	31.8336	85.1653	64.4797	57.3731	67.0349	80.0492	43.5033
	ENSMUSG00000103469.2	Gm9910	-0.692891	2.94219	45.5499	5.56007e-07	0.000481891	5.692	6.11919	5.90451	5.24308	5.08072	6.7731	11.1855	8.4477	9.63631	8.30209	10.3794	8.39759
	ENSMUSG00000118456.2	Gm41381	-0.712762	1.44902	13.5925	0.00115743	0.0423558	2.80997	1.2476	2.26474	1.8176	1.52422	1.76101	2.33621	2.96989	3.26152	3.70944	2.98585	3.40955
	ENSMUSG00000055866.10	Per2	-0.767943	5.04914	15.8525	0.000551833	0.0302205	18.6611	21.5063	23.3754	31.8779	19.8148	16.3909	51.8213	41.7105	25.0544	39.2141	43.1526	23.2986
	ENSMUSG00000074236.4	Gm9387	-0.857328	-0.0565565	15.0179	0.000721369	0.0351242	0.720506	0.415868	0.808837	0.699077	0.653235	0.406386	0.849529	1.05596	0.81538	1.3248	1.7062	0.947096
	ENSMUSG00000121050.1	ENSMUSG00000121050.1	-0.887972	0.512253	17.9009	0.000293361	0.022366	0.936658	1.12878	0.64707	1.11852	0.580654	0.812772	1.55747	1.38595	1.40838	1.67808	2.13275	1.64163
	ENSMUSG00000046694.7	Tent5b	-0.922227	4.28467	40.4849	1.4041e-06	0.000837781	12.2486	8.79263	12.537	9.92689	15.3147	11.3111	30.7246	23.6272	18.2349	19.1655	23.7446	16.8583
	ENSMUSG00000021750.17	Fam107a	-0.929068	4.44181	26.418	2.91521e-05	0.00616247	14.3381	16.7535	14.4782	9.85698	15.7502	9.68553	32.4945	31.3489	24.6838	21.6384	28.9343	14.9641
	ENSMUSG00000120878.1	ENSMUSG00000120878.1	-0.975828	1.74443	18.5953	0.000238635	0.020178	1.58511	2.49521	1.45591	1.8176	1.23389	2.09966	3.25653	4.02586	2.52027	5.03424	3.62567	2.90443
	ENSMUSG00000028862.7	Map3k6	-1.00159	5.22984	52.459	1.74729e-07	0.000201917	22.6959	19.1299	23.0519	22.9996	24.7504	16.5264	48.3524	48.1123	41.6585	40.8922	47.9868	31.191
	ENSMUSG00000002289.17	Angptl4	-1.05134	5.81947	21.4848	0.000104938	0.0126595	35.0166	17.11	48.2876	19.0149	44.8555	24.8573	68.2455	86.9189	81.1674	54.0519	52.8922	46.2183
	ENSMUSG00000046828.4	Mettl21e	-1.11566	0.993607	15.1235	0.00069707	0.0345296	1.08076	1.18819	0.808837	1.04862	0.87098	1.76101	2.69018	2.7719	1.77901	1.7664	3.19912	2.52559
	ENSMUSG00000000982.6	Ccl3	-1.17911	1.04987	15.1141	0.000699198	0.0345296	0.792557	0.534687	0.808837	0.489354	1.37905	1.49008	1.06191	2.63991	3.40977	0.971521	2.06166	2.20989
	ENSMUSG00000024401.15	Tnf	-1.31992	2.12576	28.6921	1.68815e-05	0.00443371	2.08947	3.14871	2.02209	2.37686	3.33876	1.9642	3.68129	8.05171	9.11743	8.03713	6.25606	2.58873
	ENSMUSG00000066170.9	E230001N04Rik	-1.36564	-0.106572	15.5395	0.000609704	0.0319293	0.576405	0.415868	0.64707	0.559261	0.798399	0.067731	1.84065	1.71594	0.889506	1.3248	1.35074	0.757677

## Sheet: d IPA Canonical pathways 6dpi
	Ingenuity Canonical Pathways	-log(p-value)	Ratio	z-score	Molecules
IPA Canonical Pathway analysis for DEGs shown in c.	Protein Kinase A Signaling	2.06	0.0389	1.732	AKAP7,ANAPC13,ATF2,CREB3L4,CREBBP,DUSP16,DUSP5,GNG5,MAP3K1,PTCH1,PTCH2,PTGS2,PTPN21,PTPN23,PTPRB,REL
	BAG2 Signaling Pathway	2.84	0.0833	1.633	CASP3,CDKN1A,HSPA1A/HSPA1B,Hspa1b,MYC,REL,SP1
	Endocannabinoid Cancer Inhibition Pathway	3.74	0.0748	1.508	ATF2,ATF3,CASP3,CDKN1A,CDKN1B,CNR1,CREB3L4,CREBBP,MYC,PIK3R5,PRKAA2
	PTEN Signaling	2.47	0.0596	1.414	BCL2L1,CASP3,CDKN1A,CDKN1B,CNKSR3,FOXO3,INSR,PIK3R5,REL
	RAR Activation	3.38	0.0467	1.342	ATF2,CARM1,CDKN1A,CDKN1B,CREB3L4,CREBBP,CSK,GATA6,HOXA5,KAT2B,KLF2,MAP3K1,PIK3R5,RARA,REL,RND3,SORBS3,SP1,TNF,Tnfsf9
	DNA damage-induced 14-3-3σ Signaling	2.67	0.109	1.342	BCL2L1,CASP3,CDKN1A,CDKN1B,RAD17
	AMPK Signaling	4.51	0.0661	1.155	ADRA1A,ATF2,CDKN1A,CREB3L4,CREBBP,CRTC2,FOXO3,GNG5,INSR,KAT2B,PFKFB3,PFKFB4,PIK3R5,PPM1K,PRKAA2,SIRT1
	Macrophage Alternative Activation Signaling Pathway	3.37	0.0635	1.155	ATF2,CD36,CREB3L4,CREBBP,KLF4,MYC,NR3C1,PIK3R5,REL,SYK,TNF,ZC3H12A
	S100 Family Signaling Pathway	1.43	0.0298	1.043	ADRA1A,Agtr1b,ATF2,CASP3,CD36,CDKN1A,CNR1,CREB3L4,CREBBP,GLP1R,GPR157,HCAR2,LPAR3,LPAR6,MYH9,NR3C1,P2RY10,PIK3R5,PTGER2,PTGER4,S1PR1,SP1,TNF
	Role of IL-17F in Allergic Inflammatory Airway Diseases	2.63	0.106	1	ATF2,CREB3L4,CREBBP,CXCL6,REL
	G-Protein Coupled Receptor Signaling	2.39	0.0356	1	ADRA1A,Agtr1b,ATF2,CNR1,CREB3L4,CREBBP,FOXO3,GLP1R,GNG5,GPR157,HCAR2,LPAR3,LPAR6,MAP3K1,MAP3K6,P2RY10,PIK3R5,PTGER2,PTGER4,RAPGEF1,RAPGEF3,REL,RGS16,RGS2,S1PR1
	IL-10 Signaling	3.56	0.0714	0.905	AHR,ATF2,BCL2L1,CDKN1A,CREB3L4,CREBBP,PRKAA2,REL,SIRT1,SP1,TNF
	Autophagy	3.38	0.0602	0.832	ATF2,CDKN1B,CREB3L4,CREBBP,DAPK3,FOXO3,INSR,MYC,PIK3R5,PRKAA2,RIPK2,SIRT1,TNF
	p53 Signaling	3.11	0.0816	0.816	BCL2L1,CDKN1A,CSNK1D,KAT2B,PIK3R5,PPP1R13B,SIRT1,STAG1
	FGF Signaling	2.13	0.0698	0.816	ATF2,CREB3L4,CREBBP,FGF7,MAP3K1,PIK3R5
	White Adipose Tissue Browning Pathway	2.18	0.058	0.707	ANGPT2,ATF2,CREB3L4,CREBBP,PRKAA2,RARA,RUNX1T1,SIRT1
	Gαq Signaling	2.14	0.0529	0.707	ADRA1A,Agtr1b,CSK,GNG5,PIK3R5,REL,RGS16,RGS2,RND3
	Oxytocin In Brain Signaling Pathway	1.33	0.0402	0.707	ATF2,CREB3L4,CREBBP,GNG5,PIK3R5,PTGS2,RGS2,TNF
	Breast Cancer Regulation by Stathmin1	1.52	0.032	0.688	ADRA1A,Agtr1b,ATF2,CDKN1B,CNR1,CREB3L4,CREBBP,GLP1R,GNG5,GPR157,HCAR2,LPAR3,LPAR6,P2RY10,PIK3R5,PTGER2,PTGER4,RLIM,S1PR1
	Oxytocin Signaling Pathway	1.94	0.0426	0.577	ATF2,CCL5,CD36,CREB3L4,CREBBP,GNG5,MYH14,MYH9,PIK3R5,PRKAA2,PTGS2,REL
	Estrogen-Dependent Breast Cancer Signaling	2.2	0.0723	0.447	ATF2,CREB3L4,CREBBP,PIK3R5,REL,SP1
	ERK5 Signaling	1.79	0.0676	0.447	ATF2,CREB3L4,CREBBP,FOXO3,MYC
	Role of MAPK Signaling in Inhibiting the Pathogenesis of Influenza	1.68	0.0633	0.447	ATF2,CASP3,CCL5,PTGS2,TNF
	Aryl Hydrocarbon Receptor Signaling	2.33	0.0566	0.378	AHR,CDKN1A,CDKN1B,MYC,NQO2,RARA,REL,SP1,TNF
	Role of PKR in Interferon Induction and Antiviral Response	2.22	0.0588	0.378	ATF2,ATF3,CASP3,HSPA1A/HSPA1B,Hspa1b,REL,SP1,TNF
	Corticotropin Releasing Hormone Signaling	1.94	0.0526	0.378	ATF2,CNR1,CREB3L4,CREBBP,NR4A1,PTCH1,PTCH2,PTGS2
	Endocannabinoid Developing Neuron Pathway	1.86	0.0551	0.378	ATF2,CDKN1B,CNR1,CREB3L4,CREBBP,GNG5,PIK3R5
	Gαs Signaling	4.34	0.0873	0.302	ATF2,CNR1,CREB3L4,CREBBP,GLP1R,GNG5,HCAR2,PTGER2,PTGER4,RAPGEF3,RGS2
	Osteoarthritis Pathway	4.07	0.0636	0.277	ATF2,CASP3,CREB3L4,CREBBP,FOXO3,HES1,MYBBP1A,PRKAA2,PTCH1,PTCH2,PTGS2,REL,SIRT1,SP1,TNF
	Activin Inhibin Signaling Pathway	3.36	0.0599	0.277	ATF2,CDKN1A,CDKN1B,CREBBP,FBXO32,FOSL2,FOXO3,GATA2,LIMK1,MAP3K1,PIK3R5,PTGS2,TNF
	RHOA Signaling	3.06	0.0726	0	BAIAP2,CDC42EP3,CDC42EP4,LIMK1,LPAR3,LPAR6,NRP2,RND3,SEPTIN10
	Ribonucleotide Reductase Signaling Pathway	2.65	0.0588	0	ATF2,CASP3,CDKN1A,CREB3L4,CREBBP,FOXO3,MYC,PIK3R5,SP1,TIPARP
	DNA Methylation and Transcriptional Repression Signaling	2.46	0.0714	0	ERCC5,GATAD2A,MBD1,MBD4,MYC,SP1,TET1
	Regulation Of The Epithelial Mesenchymal Transition In Development Pathway	2.1	0.069	0	Aph1c,AXIN1,AXIN2,PTCH1,PTCH2,REL
	Immunogenic Cell Death Signaling Pathway	2.03	0.0667	0	CASP3,DAPK3,HSPA1A/HSPA1B,Hspa1b,PRF1,TNF
	WNT/Ca+ pathway	1.99	0.0758	0	ATF2,AXIN1,CREB3L4,CREBBP,REL
	NGF Signaling	1.99	0.0583	0	ATF2,CREB3L4,CREBBP,MAP3K1,MAP3K6,PIK3R5,REL
	PFKFB4 Signaling Pathway	1.82	0.0833	0	ATF2,CREB3L4,CREBBP,PFKFB4
	HGF Signaling	1.78	0.053	0	ATF2,CDKN1A,MAP3K1,MAP3K6,PIK3R5,PTGS2,RAPGEF1
	P2Y Purigenic Receptor Signaling Pathway	1.76	0.0526	0	ATF2,CREB3L4,CREBBP,GNG5,MYC,PIK3R5,REL
	MSP-RON Signaling In Cancer Cells Pathway	1.65	0.05	0	ATF2,CREB3L4,CREBBP,MYC,PIK3R5,REL,SP1
	JAK/STAT Signaling	1.62	0.061	0	BCL2L1,CDKN1A,CISH,PIK3R5,REL
	Xenobiotic Metabolism AHR Signaling Pathway	1.52	0.0575	0	AHR,CREBBP,NQO2,REL,TNF
	p38 MAPK Signaling	1.48	0.05	0	ATF2,CREB3L4,CREBBP,MYC,TIFA,TNF
	eNOS Signaling	1.43	0.0449	0	CASP3,HSPA1A/HSPA1B,Hspa1b,LPAR3,LPAR6,PIK3R5,PRKAA2
	cAMP-mediated signaling	2.54	0.0508	-0.302	AKAP7,ATF2,CNR1,CREB3L4,CREBBP,GLP1R,HCAR2,PTGER2,PTGER4,RAPGEF3,RGS2,S1PR1
	HER-2 Signaling in Breast Cancer	2.22	0.0485	-0.333	CASP3,CDKN1A,CDKN1B,FOXO3,MYC,NUP188,NUP98,PIK3R5,PTGS2,REL,SP1
	MSP-RON Signaling In Macrophages Pathway	2.57	0.0672	-0.378	ATF2,CREB3L4,CREBBP,NFKBIZ,PIK3R5,PTGS2,REL,TNF
	Ephrin Receptor Signaling	1.69	0.0446	-0.378	ATF2,AXIN1,CREB3L4,CREBBP,EFNB1,GNG5,LIMK1,RAPGEF1,SH2D3C
	Natural Killer Cell Signaling	1.34	0.0404	-0.378	HSPA1A/HSPA1B,Hspa1b,LIMK1,MAP3K1,MAP3K6,PIK3R5,REL,SYK
	MYC Mediated Apoptosis Signaling	2.51	0.1	-0.447	BCL2L1,CASP3,CREBBP,MYC,TNF
	GADD45 Signaling	2.17	0.0833	-0.447	CDKN1A,FOXO3,MYC,REL,TNF
	Ceramide Signaling	2.01	0.0659	-0.447	KSR1,MAP3K1,PIK3R5,REL,S1PR1,TNF
	Renin-Angiotensin Signaling	1.97	0.0579	-0.447	ATF2,CCL5,MAP3K1,PIK3R5,PTGER2,REL,TNF
	Sumoylation Pathway	1.77	0.0583	-0.447	CBX4,CREBBP,NR3C1,RND3,SIRT1,SP1
	Neurotrophin/TRK Signaling	1.7	0.0641	-0.447	ATF2,CREB3L4,CREBBP,PIK3R5,SPRY1
	Type II Diabetes Mellitus Signaling	1.47	0.0458	-0.447	CD36,INSR,MAP3K1,PIK3R5,PRKAA2,REL,TNF
	IL-15 Production	1.43	0.0488	-0.447	CLK1,CLK2,CSK,INSR,REL,SYK
	Estrogen Receptor Signaling	3.21	0.0465	-0.471	ATF2,CARM1,CDKN1A,CREB3L4,CREBBP,FBXO32,FOXO3,GNG5,GPS2,HES1,LIMK1,MED12,MYC,NR3C1,PELP1,PIK3R5,PRKAA2,REL,SP1
	Chronic Myeloid Leukemia Signaling	2.39	0.0468	-0.577	AXIN1,BCL2L1,CDKN1A,CDKN1B,FOXO3,HES1,KLF4,MYC,PIK3R5,PRKAA2,PTCH1,REL,SIRT1
	Neuroinflammation Signaling Pathway	1.94	0.041	-0.632	Aph1c,ATF2,CASP3,CCL5,CREB3L4,CREBBP,GDNF,GLUL,PIK3R5,PTGS2,REL,SYK,TNF
	Phagosome Formation	1.4	0.0302	-0.655	ADRA1A,Agtr1b,CD36,CNR1,GLP1R,GPR157,HCAR2,LIMK1,LPAR3,LPAR6,MYH14,MYH9,P2RY10,PIK3R5,PTGER2,PTGER4,RAPGEF1,RAPGEF3,S1PR1,SYK,TLN1
	Death Receptor Signaling	2.51	0.0729	-0.816	ACIN1,CASP3,LIMK1,REL,TIPARP,TNF,TNFRSF21
	IL-33 Signaling Pathway	2.88	0.0591	-0.905	ATF2,BCL2L1,CASP3,CCL5,CREB3L4,CREBBP,GATA3,PIK3R5,PTGS2,SYK,TNF
	Colorectal Cancer Metastasis Signaling	2.07	0.0443	-0.905	AXIN1,BCL2L1,CASP3,GNG5,MYC,PIK3R5,PTGER2,PTGER4,PTGS2,REL,RND3,TNF
	CD27 Signaling in Lymphocytes	2.26	0.0877	-1	BCL2L1,CASP3,MAP3K1,MAP3K6,REL
	Small Cell Lung Cancer Signaling	1.9	0.0625	-1	BCL2L1,CDKN1B,MYC,PIK3R5,PTGS2,REL
	Huntington's Disease Signaling	1.57	0.0389	-1	ATF2,BCL2L1,CASP3,CREB3L4,CREBBP,DCTN1,GNG5,HSPA1A/HSPA1B,Hspa1b,PIK3R5,SP1
	Endometrial Cancer Signaling	1.5	0.0667	-1	AXIN1,FOXO3,MYC,PIK3R5
	Role of Pattern Recognition Receptors in Recognition of Bacteria and Viruses	1.43	0.0449	-1	CCL5,PIK3R5,REL,RIPK2,SYK,TNF,Tnfsf9
	Pancreatic Adenocarcinoma Signaling	1.39	0.0476	-1	BCL2L1,CDKN1A,CDKN1B,PIK3R5,PTGS2,REL
	Pyridoxal 5'-phosphate Salvage Pathway	1.39	0.0615	-1	CSNK1D,LIMK1,MAP3K6,PRKAA2
	Hepatic Fibrosis Signaling Pathway	3.04	0.0449	-1.213	Agtr1b,ATF2,AXIN1,CASP3,CCL5,CDKN1B,CNR1,CREB3L4,CREBBP,CSNK1D,KLF9,MYC,PIK3R5,PTCH1,PTCH2,REL,RND3,SP1,TNF
	ID1 Signaling Pathway	2.14	0.0498	-1.265	ATF3,BCL2L1,CDKN1A,CDKN1B,CREBBP,FOXO3,MYC,PIK3R5,PTGER4,TNF
	Senescence Pathway	1.42	0.0368	-1.265	ANAPC13,ATF3,CDKN1A,CDKN1B,CREBBP,EP400,FOXO3,KAT2B,PIK3R5,SIRT1,ZFP36L1
	ILK Signaling	4.88	0.0746	-1.387	ACTN1,ACTN4,ATF2,CASP3,CREB3L4,CREBBP,LIMS2,MYC,MYH14,MYH9,PIK3R5,PTGS2,REL,RND3,TNF
	ERK/MAPK Signaling	1.54	0.0419	-1.667	ATF2,CREB3L4,CREBBP,KSR1,MYC,PIK3R5,RAPGEF1,RAPGEF3,TLN1
	Mitochondrial Dysfunction	1.36	0.0349	-1.732	Aph1c,ATF2,ATP1A1,C9orf72,CASP3,CREB3L4,CREBBP,PIK3R5,PRKAA2,RAPGEF3,SIRT1,ZNF746
	VEGF Signaling	1.32	0.0505	-2	ACTN1,ACTN4,BCL2L1,FOXO3,PIK3R5
	Actin Cytoskeleton Signaling	1.6	0.041	-3	ACTN1,ACTN4,BAIAP2,CSK,FGF7,LIMK1,MYH14,MYH9,PIK3R5,TLN1

## Sheet: e IPA D&F 6dpi
	Categories	Diseases or Functions Annotation	p-value	Predicted Activation State	Activation z-score	Molecules	# Molecules
IPA Diseases and Functions analysis for DEGs shown in c.	Cellular Development,Tissue Development	Differentiation of epithelial tissue	1.38e-08	Increased	3.054	ANGPT2,BTG1,CASP3,CDKN1A,CDKN1B,CREBBP,FGF7,GAK,GATA2,GATA5,GATA6,GPR157,HES1,HEY1,HHEX,INSR,KAT2B,KLF2,KLF4,KLF7,MYC,MYH9,NFKBIZ,OSR1,PRKAA2,PTCH1,PTCH2,PTGS2,RND3,RNF144B,SCRIB,SOX11,STK4,TNF,ZFP36L1	35
	Cellular Development,Embryonic Development,Organismal Development,Tissue Development	Differentiation of embryonic tissue	7.17e-06	Increased	2.593	AXIN1,BCL2L1,BTG2,BYSL,CDKN1B,FOSL2,FOXO3,GATA2,GATA6,GDNF,HES1,HHEX,MEOX2,NR3C1,NR4A2,OSR1,PTCH1,RARA,S1PR1,SIRT1,SOX11,SP1,TET1,TNF	24
	Cellular Development,Tissue Development	Differentiation of epithelial cells	4.98e-08	Increased	2.405	CASP3,CDKN1A,CDKN1B,CREBBP,FGF7,GAK,GATA2,GATA5,GATA6,GPR157,HES1,HHEX,INSR,KAT2B,KLF2,KLF4,KLF7,MYC,MYH9,NFKBIZ,OSR1,PTCH1,PTCH2,PTGS2,RND3,RNF144B,SCRIB,SOX11,STK4,TNF,ZFP36L1	31
	Developmental Disorder,Organismal Injury and Abnormalities,Organismal Survival	Death of embryo	8.8e-13	Increased	2.231	AHR,ANGPT2,ATF2,AXIN1,BCL2L1,Brd4,BYSL,C1GALT1C1,CARM1,CASP3,CCN1,CDKN1A,CDKN1B,CREBBP,CSK,CXXC1,DCTN1,DNAJA3,DYNC1H1,E4F1,FGF7,Foxp1,GAK,GATA2,GATA3,GATA5,GATA6,HIRA,KAT2B,KLF2,LFNG,MED12,MYBBP1A,MYC,MYH9,NRP2,PFKFB3,PHC2,PHF12,POLG,PPP6C,PPRC1,PTCH1,RAD17,RAPGEF1,RARA,RNF31,S1PR1,SIRT1,SLX4,SP1,STAG1,TLN1,TNF,UPF1,WDR1,ZNF335	57
	Organismal Development	Growth of organism	2.04e-10	Increased	2.188	ADAMTS1,ADARB1,AHR,ANKRD11,ATF2,BCL2L1,BTG2,BYSL,CD36,CDKN1A,CDKN1B,CDON,CNR1,CSNK1D,CXCL2,DCTN1,DLGAP4,EFNB1,EP400,ERCC5,FGF7,FOSL2,FOXO3,Foxp1,GAK,GATA2,GATA3,GATAD2A,GNG5,HES1,HHEX,HIRA,HOXA5,INSR,KCNJ2,KLF2,KLF4,KSR1,LIMS2,LNX2,MAP3K1,MYC,NR3C1,OSR1,PLK2,PTCH1,PTGS2,RAPGEF1,RARA,S1PR1,SAFB,SELENOP,SERP1,SIRT1,SLC25A25,SOX11,STK4,TGIF1,TLN1,TMED2,TNF,ZFP36L1,ZNF335	63
	Cell Death and Survival,Embryonic Development,Organismal Injury and Abnormalities	Cell death of embryonic cell lines	2.43e-07	Increased	2.028	AHR,ATF2,ATF3,BANP,BCL2L1,BNIP3L,CASP3,CDKN1A,CDKN1B,CDON,DAPK3,DLST,DNAJA3,FOXO3,IER3,MAP3K1,MYC,NR4A2,PPP6R1,PRKAA2,PTCH1,REL,RGS16,RNF216,RNF31,SIRT1,STK4,SYVN1,TNF,TNFRSF19,ZC3H12A	31
	Embryonic Development,Organismal Development,Tissue Development	Growth of embryo	7.23e-08		1.972	AHR,ATF2,BTG2,BYSL,CDKN1A,CDKN1B,CDON,CNR1,DCTN1,DLGAP4,EFNB1,EP400,FGF7,FOXO3,Foxp1,GAK,GATA2,GATA3,GATAD2A,GNG5,HES1,HIRA,INSR,KLF2,KLF4,KSR1,LIMS2,LNX2,MAP3K1,MYC,OSR1,PTCH1,PTGS2,RAPGEF1,S1PR1,SOX11,STK4,TLN1,ZNF335	39
	Cell Death and Survival,Organismal Injury and Abnormalities	Cell death of leukemia cell lines	8.28e-06		1.97	AHR,BCL2L1,BTG1,C1GALT1C1,CASP3,CD47,CDKN1A,CDKN1B,E4F1,EGR3,FKBP5,FOXO3,GATA2,HES1,HSPA1A/HSPA1B,KLF4,MAP3K1,MYC,NR3C1,PRF1,REL,RNF31,RUNX1T1,SGMS1,STK4,TNF,UBA1	27
	Cellular Function and Maintenance	Cellular homeostasis	4.36e-11		1.943	ADAMTS1,ADRA1A,AHR,ANGPT2,ANGPTL4,AP3D1,ATF2,ATP1A1,ATP7B,BAIAP2,BCL2L1,BNIP3L,C9orf72,CARM1,CASP3,CCL3L3,CCL5,CCN1,CCNT1,CD36,CD47,CDKN1A,CDKN1B,CHERP,CISH,CNR1,CREBBP,CRTC2,CSK,CXCL2,CXCL6,CYB561,DACT1,DAPK3,DCTN1,DNAJA3,DRAM2,EFNB1,EGR3,FGF7,FOXO3,Foxp1,GATA2,GATA3,GDNF,GLP1R,GRAMD2A,HERPUD1,HLX,INSR,KCNJ2,KCNK13,KLF10,KLF15,KLF2,KLF4,KLF7,KLHL25,LFNG,LPAR3,Mir142hg,MYC,NACC1,NFKBIZ,NHLRC1,NMT…	111
	Cellular Development	Differentiation of progenitor cells	8.56e-07		1.89	ANGPT2,ATF2,BAIAP2,BCL2L1,BTG1,BTG2,CASP3,CDKN1A,CDKN1B,CDON,DEK,EGR3,Foxp1,GATA2,GATA3,GDNF,HES1,HEY1,HHEX,HOXA5,KLF4,LFNG,MYC,PLSCR1,PRKD2,PTCH1,PTGS2,RARA,S1PR1,SP1,SPRY1,STK4,SYK,TNF,TPCN2,ZC3H12A,ZFP36L1,Zfp429 (includes others)	38
	Cell Death and Survival	Cell viability	3.41e-11		1.88	ACTN4,ADAMTS1,AEN,AHR,AKAP7,ALG6,ANGPT2,ATF2,ATF3,ATP7B,BCL2L1,Brd4,BTG2,C1GALT1C1,C9orf72,CASP3,CCL5,CCN1,CCNL1,CD47,CDKN1A,CDKN1B,CISH,CREBBP,CRTC2,CXCL2,DAPK3,DUSP5,EFNB1,EGR3,EPRS1,FBXO32,FGF7,FKBP5,FOXO3,Foxp1,GAK,GATA2,GATA3,GATA6,GDNF,GLP1R,HERPUD1,HES1,HEY1,HHEX,HIC1,HOXA5,HSF2,HSPA1A/HSPA1B,Hspa1b,IER3,INSIG1,INSR,KIRREL1,KLF2,KLF4,KLF6,KLF9,KSR1,LNX2,MAP3K1,MBD4,MED12,MYC,MYCT1,NACC1,NR…	104
	Cell Death and Survival	Cell survival	1.63e-12		1.741	ACTN4,ADAMTS1,AEN,AHR,AKAP7,ALG6,ANGPT2,ATF2,ATF3,ATP7B,BCL2L1,Brd4,BTG2,C1GALT1C1,C9orf72,CASP3,CCL5,CCN1,CCNG2,CCNL1,CD47,CDKN1A,CDKN1B,CISH,CLK2,CREBBP,CRTC2,CXCL2,DAPK3,DUSP5,EFNB1,EGR3,EPRS1,ERCC5,FBXO32,FGF7,FKBP5,FOXO3,Foxp1,GAK,GATA2,GATA3,GATA6,GDNF,GLP1R,HERPUD1,HES1,HEY1,HHEX,HIC1,HLX,HOXA5,HSF2,HSPA1A/HSPA1B,Hspa1b,IER3,INSIG1,INSR,JDP2,KIRREL1,KLF2,KLF4,KLF6,KLF9,KSR1,LNX2,MAP3K1,MBD…	111
	Cell Death and Survival,Organismal Injury and Abnormalities	Cell death of fibroblast cell lines	1.95e-07		1.729	AHR,ATF2,ATF3,AXIN1,BANP,BCL2L1,BNIP3L,CASP3,CCN1,CDKN1A,CDKN1B,DAPK3,DNAJA3,EP400,FOXO3,GLP1R,IER3,KLF6,MAP3K1,MYC,NR4A2,PPP6R1,PRKAA2,REL,RNF31,SIRT1,STK17B,STK4,SYK,TNF,UBA1,UNC5C,ZC3H12A	33
	Nervous System Development and Function	Neuroprotection	1.01e-05		1.704	CASP3,CNR1,GDNF,NR4A2,PTGS2,REL,SIRT1,SP1,TNF,TRIM2	10
	Cell Morphology,Cellular Development	Branching of cells	5.65e-06		1.658	AHR,ANGPT2,ATF3,BAIAP2,CASP3,CCN1,CDKN1A,CNR1,CREBBP,DACT1,DPYSL2,EFNB1,EGR3,FAM107A,FGF7,GDNF,GLUL,HEY1,HLX,KCNK13,KDM5C,KLF9,LIMK1,MARK4,NR3C1,NR4A1,NRP2,PLK2,PRKAA2,PTGS2,RND3,TGIF1,TNF,TNFRSF21	34
	Cell Morphology	Sprouting	1.1e-06		1.611	ADAMTS1,ANGPT2,ATF3,BAIAP2,CASP3,CCN1,CDKN1A,CNR1,CORO1C,CREBBP,DACT1,DPYSL2,EFNB1,EGR3,FAM107A,FGF7,GDNF,GLUL,HEY1,HLX,KDM5C,KLF9,LIMK1,MARK4,MYC,NR3C1,NR4A1,NRP2,PLK2,PRKAA2,PTGS2,S1PR1,SPRY4,STK4,TGIF1,TNF,TNFRSF21	37
	Cellular Development,Cellular Growth and Proliferation,Nervous System Development and Function,Tissue Development	Development of neural cells	2.31e-07		1.556	ADAMTS1,AHR,ATF3,AXIN1,BAIAP2,BCL2L1,BTG2,BTG3,CARM1,CASP3,CCN1,CD47,CDKN1A,CDKN1B,CNR1,CREBBP,CXCL6,DACT1,DBNL,DCTN1,DIXDC1,DNAJA3,DPYSL2,EFNB1,EGR3,FAM107A,FGF7,FOXO3,GAK,GATA3,GDNF,GPM6A,HES1,HEY1,KAT2B,KCNJ2,KDM5C,KLF4,KLF7,KLF9,LIMK1,MARK4,MED12,MYLIP,NR3C1,NR4A1,NR4A2,NRP2,NSUN5,PLK2,PRKAA2,PTGS2,RAPGEF1,RAPGEF3,RGS2,SAMD4B,SEMA7A,SIRT1,SOX11,TET1,TGIF1,TNF,TNFRSF21,UNC5C,ZNF335	65
	Cell Death and Survival,Organismal Injury and Abnormalities	Cell death of connective tissue cells	1.27e-08		1.538	AHR,ATF2,ATF3,AXIN1,BANP,BCL2L1,BNIP3L,CASP3,CCN1,CD36,CDKN1A,CDKN1B,CNR1,DAPK3,DNAJA3,EP400,FOXO3,GLP1R,HAS1,IER3,INSR,KLF2,KLF6,KSR1,MAP3K1,MBD4,MYC,NR4A1,NR4A2,OGN,PPP6R1,PRF1,PRKAA2,REL,RNF31,S1PR1,SIRT1,STK17B,STK4,SYK,SYVN1,TNF,UBA1,UNC5C,ZC3H12A	45
	Embryonic Development,Organismal Development,Tissue Development	Development of body trunk	2.36e-14		1.534	ACTN4,ADAMTS1,ADRA1A,Agtr1b,AHR,Aph1c,ATF2,ATF3,ATP7B,AXIN1,AXIN2,BCL2L1,Brd4,CASP3,CBX4,CCL3L3,CCL5,CCN1,CDKN1A,CDKN1B,CISH,CREBBP,CRTC2,CXCL2,DBNL,DNAJA3,EFNB1,EGR3,FGF7,FOXO3,Foxp1,FOXP4,GAK,GATA2,GATA3,GATA5,GATA6,GDNF,GLP1R,GNG5,GPAT4,GPS2,HES1,HEY1,HHEX,HIRA,HLX,HOXA5,INSR,KLF10,KLF15,KLF2,KLF4,KLF6,KLF7,LFNG,LIMS2,MAP3K1,MED12,MYC,MYH14,NFKBIZ,NR3C1,NR4A1,NRP2,OSR1,PELP1,PPP2R3C,PTCH1,PTGE…	93
	Cell Death and Survival,Embryonic Development,Organismal Injury and Abnormalities	Apoptosis of embryonic cell lines	2.88e-08		1.52	AHR,ATF2,ATF3,BANP,BCL2L1,BNIP3L,CASP3,CDKN1A,CDKN1B,CDON,DAPK3,FOXO3,IER3,MAP3K1,MYC,PPP6R1,PRKAA2,PTCH1,REL,RNF216,RNF31,SIRT1,STK4,SYVN1,TNF,TNFRSF19,ZC3H12A	27
	Cell Morphology,Cellular Assembly and Organization,Cellular Development,Cellular Function and Maintenance,Cellular Growth and Proliferation,Nervous System Development and Function,Organismal Development,Tissue Development	Neuritogenesis	6.03e-07		1.519	ADAMTS1,AHR,ATF3,AXIN1,BAIAP2,BTG2,BTG3,CARM1,CASP3,CCN1,CD47,CDKN1A,CNR1,CREBBP,CXCL6,DACT1,DBNL,DIXDC1,DPYSL2,EFNB1,EGR3,FAM107A,FGF7,GAK,GATA3,GDNF,GPM6A,HES1,KAT2B,KCNJ2,KDM5C,KLF7,KLF9,LIMK1,MARK4,MYLIP,NR3C1,NR4A1,NRP2,PLK2,PRKAA2,PTGS2,RAPGEF1,RAPGEF3,RGS2,SEMA7A,SIRT1,TET1,TGIF1,TNF,TNFRSF21,ZNF335	52
	Gene Expression	Activation of DNA endogenous promoter	9.17e-20		1.515	AHR,AP3D1,ATF2,ATF3,BTG2,CAMTA2,CARM1,CBX4,CCL3L3,CCN1,CCNT1,CD36,CDON,CREB3L4,CREBBP,CREBRF,CRTC2,CSRNP2,DACT1,DEK,DGKQ,DNAJA3,E4F1,EGR3,EHF,FOSL2,FOXO3,Foxp1,FOXP4,GATA2,GATA3,GATA5,GATA6,GDNF,GLP1R,Gm4924,GPS2,GTF2A1,HES1,HEY1,HHEX,HIC1,HIRA,HOXA5,HSF2,HSPA1A/HSPA1B,JDP2,KAT2B,KLF10,KLF13,KLF15,KLF2,KLF4,KLF6,KLF7,KLF9,LPIN2,MAP3K1,MBD1,MED12,MEOX2,MYC,NELFA,NFKBIZ,NR3C1,NR4A1,NR4A2,NRARP,NUCK…	99
	Gene Expression	Transcription of DNA	8.1e-20		1.501	AHR,AP3D1,ATF2,ATF3,AXIN1,BANP,BTG2,CAMTA2,CARM1,CBX4,CCL3L3,CCN1,CCNT1,CD36,CDKN1B,CDON,CREB3L4,CREBBP,CREBRF,CRTC2,CSRNP2,CXXC1,DACT1,DEK,DGKQ,DNAJA3,DUSP5,E4F1,EGR3,EHF,FGF7,FOSL2,FOXO3,Foxp1,FOXP4,GATA2,GATA3,GATA5,GATA6,GATAD2A,GDNF,GLP1R,Gm4924,GPS2,GTF2A1,HES1,HEY1,HHEX,HIC1,HIRA,HOXA5,HSF2,HSPA1A/HSPA1B,INSR,JDP2,KAT2B,KDM5C,KLF10,KLF13,KLF15,KLF2,KLF4,KLF6,KLF7,KLF9,LPIN2,MAP3K1,MBD1,MED…	114
	Cardiovascular System Development and Function,Organismal Development,Tissue Development	Vasculogenesis	8.59e-11		1.479	ADAMTS1,AHR,ANGPT2,ANGPTL4,ATF3,C1GALT1C1,CASP3,CCN1,CD36,CDKN1A,CDKN1B,CNR1,CREBBP,CRTC2,CXCL2,E4F1,EFNB1,EGR3,FGF7,FOXO3,GATA5,GATA6,GDNF,GLUL,HAS1,HES1,HEY1,HHEX,HIRA,HLX,INSR,KCNJ2,KLF10,KLF2,KLF4,KLF7,MEOX2,MYC,MYH9,NQO2,NR3C1,NR4A1,NR4A2,NRARP,NRP2,PFKFB3,PRKD2,PTCH1,PTGER2,PTGS2,PTPRB,RARA,RGCC,RGS2,RND3,S1PR1,SEMA6B,SIRT1,SP1,SPRY4,STK4,SYK,TIPARP,TNF,UBA1,ZFP36L1	66
	Protein Synthesis	Metabolism of protein	6.18e-09		1.471	ABCF1,AHR,ANGPT2,Aph1c,AXIN1,BANP,BCL2L1,BTG2,CASP3,CDKN1B,CTSO,DACT1,DAPK3,EIF4A2,EIF4ENIF1,EPRS1,FAM107A,FBXO32,FOXO3,GDNF,GEMIN5,HERPUD1,HSPA1A/HSPA1B,IER3,INSR,KLF15,KLF2,KLHL25,MAP3K1,MYBBP1A,MYC,MYH9,MYLIP,NHLRC1,NPLOC4,NR3C1,NSUN5,PLK2,PRKAA2,RAPGEF3,RARA,RASSF2,RGS2,RLIM,RNF144B,RNF40,SERP1,SGSM3,SIRT1,SP1,ST3GAL4,STK4,SYK,SYVN1,TBC1D10A,TENT5B,TIPARP,TNF,TOB1,UBE2B,UBE2G2,UBE4A,UPF1,WDR8…	68
	Cellular Movement,Immune Cell Trafficking	Leukocyte migration	3.67e-09		1.467	ACKR2,ACTN4,AHR,ANGPT2,Brd4,CCL3L3,CCL5,CCN1,CCNT1,CD36,CD47,CDKN1A,CNR1,CRTC2,CSK,CXCL2,CXCL6,DBNL,DEK,DPYSL2,EFNB1,FOSL2,Foxp1,GATA2,GATA3,GDNF,HCAR2,HSPA1A/HSPA1B,INSR,KLF15,KLF2,KLF6,LIMK1,LPAR3,MYC,MYH9,NFKBIZ,NQO2,NR3C1,NR4A1,NRP2,P2RY10,PIK3R5,PRF1,PTGER4,PTGS2,PTPRB,RAPGEF1,REL,RGCC,RGS16,RIN3,RIPK2,S1PR1,SCRIB,SERP1,SH2D3C,SIRT1,SOX11,ST3GAL4,STK4,SYK,TLN1,TNF,TNFRSF21,Tnfsf9,ZC3H12A	67
	Cardiovascular System Development and Function,Cellular Development,Cellular Function and Maintenance,Cellular Growth and Proliferation,Organismal Development,Tissue Development	Endothelial cell development	3.4e-08		1.464	ADAMTS1,ANGPT2,ANGPTL4,C1GALT1C1,CCN1,CD36,CDKN1A,CDKN1B,CRTC2,CXCL2,EGR3,FGF7,FOXO3,GATA6,HEY1,HHEX,KCNJ2,KLF2,MEOX2,MYC,NR4A1,NR4A2,NRARP,NRP2,PFKFB3,PRKD2,PTGS2,RGCC,SEMA6B,SIRT1,SP1,SPRY4,TNF,UBA1	34
	Cardiovascular System Development and Function,Embryonic Development,Organ Development,Organismal Development,Tissue Development	Cardiogenesis	4.07e-09		1.463	ADRA1A,ATF2,AXIN2,CASP3,CCL3L3,CCL5,CCN1,CDKN1A,CDKN1B,CRTC2,FOXO3,Foxp1,FOXP4,GATA3,GATA5,GATA6,GNG5,HES1,HEY1,HHEX,HIRA,INSR,KLF10,KLF15,KLF4,KLF7,LIMS2,MAP3K1,MED12,MYC,MYH14,NRP2,OSR1,PTCH1,RAPGEF3,RARA,RGS2,S1PR1,SIRT1,SOX11,STK4,TMED2,TNF,WDR1,ZFP36L1	45
	Cellular Development,Cellular Growth and Proliferation,Nervous System Development and Function,Tissue Development	Development of neurons	2.45e-06		1.447	ADAMTS1,AHR,ATF3,AXIN1,BAIAP2,BCL2L1,BTG2,BTG3,CARM1,CASP3,CCN1,CD47,CDKN1A,CNR1,CREBBP,CXCL6,DACT1,DBNL,DCTN1,DIXDC1,DNAJA3,DPYSL2,EFNB1,EGR3,FAM107A,FGF7,GAK,GATA3,GDNF,GPM6A,HES1,HEY1,KAT2B,KCNJ2,KDM5C,KLF7,KLF9,LIMK1,MARK4,MYLIP,NR3C1,NR4A1,NR4A2,NRP2,PLK2,PRKAA2,PTGS2,RAPGEF1,RAPGEF3,RGS2,SAMD4B,SEMA7A,SIRT1,SOX11,TET1,TGIF1,TNF,TNFRSF21,UNC5C,ZNF335	60
	Cellular Development,Connective Tissue Development and Function,Tissue Development	Differentiation of adipocytes	1e-10		1.425	ATF2,ATF3,AXIN1,AXIN2,CARM1,DACT1,FOSL2,GATA2,GATA3,GATA6,GPS2,HES1,INSIG1,INSR,JDP2,KLF15,KLF4,MYC,NFKBIZ,NR3C1,NR4A1,NR4A2,PER2,PTGS2,RGS2,RUNX1T1,SIRT1,SOX11,STK4,TGIF1,TNF,ZC3H12A,ZFP36L1	33
	Cellular Development,Embryonic Development,Hair and Skin Development and Function,Organ Development,Organismal Development,Tissue Development	Differentiation of epidermal cells	7.26e-07		1.392	CASP3,CDKN1A,FGF7,GAK,INSR,KLF4,KLF7,MYC,MYH9,NFKBIZ,PTCH1,PTCH2,PTGS2,RND3,RNF144B,STK4,TNF,ZFP36L1	18
	Cardiovascular System Development and Function,Cellular Movement	Migration of endothelial cells	2.81e-08		1.389	ADAMTS1,ANGPT2,ANGPTL4,ATF2,CCL5,CCN1,CD36,CDKN1B,EGR3,FOXO3,GATA2,GATA3,GATA6,GLUL,HEY1,HHEX,HLX,INSR,KLF2,MEOX2,MYC,NR4A1,NR4A2,NRP2,PRKD2,PTGS2,RGCC,S1PR1,SIRT1,SP1,SPRY4,TNF,ZC3H12A	33
	Nervous System Development and Function	Development of central nervous system	9e-07		1.385	ATF2,AXIN2,BCL2L1,BTG2,CASP3,CDKN1B,CDON,CNR1,CORO1C,DCTN1,DIXDC1,FOXO3,GAK,GDNF,HES1,HEY1,HHEX,HIRA,IER3IP1,KLF9,MED12,MEOX2,MYC,NR3C1,NR4A2,NRP2,NSUN5,PITPNM1,PTCH1,RAPGEF3,RARA,S1PR1,SAMD4B,SCRIB,SELENOP,SEMA6B,SEMA7A,SH2D3C,SOX11,SPRY4,STK4,TGIF1,TNF,TNFRSF21,UNC5C,WDR1,WDR4,ZNF335	48
	Tissue Development	Development of epithelial tissue	8.92e-08		1.38	ADAMTS1,AHR,ANGPT2,ANGPTL4,C1GALT1C1,CCN1,CD36,CDKN1A,CDKN1B,CRTC2,CXCL2,EGR3,FGF7,FOSL2,FOXO3,GAK,GATA6,GDNF,HEY1,HHEX,HOXA5,KCNJ2,KLF2,KLF4,MAP3K1,MEOX2,MYC,NR4A1,NR4A2,NRARP,NRP2,PFKFB3,PRKD2,PTGS2,PTPN23,RGCC,SCRIB,SEMA6B,SIRT1,SP1,SPRY4,TNF,UBA1	43
	Cancer,Neurological Disease,Organismal Injury and Abnormalities	Glioma	9.19e-17		1.342	ABCF1,ACIN1,ACKR2,ACTN1,ACTN4,ADAMTS1,ADAMTS15,ADAMTSL2,ADARB1,ADRA1A,AHDC1,AHR,AMMECR1L,AMOTL2,ANGPT2,ANKRD11,AP3D1,AP5B1,ARFGAP1,ARFGAP2,ARL5B,ASB3/GPR75-ASB3,ATF2,ATF3,ATP1A1,ATP7B,AXIN1,AXIN2,B4GALT4,BAIAP2,BANP,BCL2L1,BCLAF3,BET1,BNIP3L,BTG3,C1GALT1C1,CAMTA2,CAPN15,CARM1,CASKIN2,CASP3,CASS4,CBX4,CCNG2,CCNL1,CCNT1,CD36,CD47,CDC42EP3,CDC42EP4,CDKN1A,CDKN1B,CDON,CEPT1,CHERP,CHIC1,CHST8,CISH,CLK…	298
	Cell Death and Survival	Cell viability of tumor cell lines	3.88e-07		1.328	ACTN4,ADAMTS1,AEN,AHR,AKAP7,ANGPT2,ATF2,ATF3,ATP7B,BCL2L1,BTG2,C1GALT1C1,CASP3,CCNL1,CDKN1A,CDKN1B,CXCL2,DAPK3,DUSP5,FKBP5,FOXO3,GAK,GATA2,HES1,HEY1,HHEX,HIC1,HOXA5,HSF2,HSPA1A/HSPA1B,IER3,INSIG1,INSR,KLF4,KLF6,KLF9,LNX2,MAP3K1,MED12,MYC,MYCT1,NACC1,NR3C1,NR4A1,PHLDA1,PLK2,PPP6C,PRKAA2,PRKD2,PTGS2,PTPN23,RAMAC,REL,RGS16,RNF31,SF3A1,SIRT1,SOX11,SUPT5H,SYK,SYVN1,TNF,TOB1,UPF1,USP10,WDR1,ZNF665	67
	Cancer,Organismal Injury and Abnormalities	Cancer of cells	8.17e-10		1.301	ABCF1,ABTB2,ACIN1,ACKR2,ACTN4,ADAMTS1,ADAMTS15,ADAMTSL2,ADARB1,ADRA1A,AEN,AHR,AKAP7,AMMECR1L,ANGPT2,ANGPTL4,ANKRD11,AP3D1,AP5B1,ATF2,ATF3,ATP1A1,AXIN1,AXIN2,BANP,BCAR3,BCL2L1,BNIP3L,BOP1,BTG1,BTG2,C17orf80,C1GALT1C1,CAMTA2,CASP3,CBX4,CCL5,CCN1,CCNG2,CD36,CD47,CDC42EP3,CDKN1A,CDKN1B,CDON,CHERP,CHIC1,CHST8,CLK1,CNR1,CPSF1,CREB3L4,CREBBP,CSK,CWF19L2,CXCL2,CXCL6,CXXC1,CYB561,DACT1,DAPK3,DEK,DIP2C,DLG…	242
	Cellular Growth and Proliferation	Colony formation	1.5e-08		1.296	AHR,ATF2,ATF3,AXIN2,BCL2L1,BNIP3L,CCL3L3,CCN1,CCNG2,CDKN1A,CDKN1B,CREBBP,DNAJA3,DUSP5,DYNC1H1,EHF,EP400,FOXO3,GDNF,HCAR2,HES1,HOXA5,HSPA1A/HSPA1B,INSR,KAT2B,KLF2,KLF4,KLF6,MAP3K1,MYC,NR4A1,PELP1,PHLDA1,PLSCR1,PTCH1,PTGS2,RAD17,RAPGEF1,RASSF2,RNF144B,RRAD,SAFB,SIRT1,SP1,SPRY1,SPRY4,STK4,SYK,TNF,TPD52,TRIM2,UNC5C	52
	Cellular Development,Tissue Development	Differentiation of neural cells	1.77e-09		1.295	AXIN1,AXIN2,BCL2L1,BNIP3L,BTG2,CCL5,CDKN1B,CDON,CNR1,DIXDC1,DPYSL2,EFNB1,EIF4ENIF1,FGF7,FOXO3,GATA2,GATA3,GDNF,GLUL,GPR157,HES1,HEY1,HSPA1A/HSPA1B,KLF15,KLF6,KLF9,LNX2,MBD1,MED12,MYC,NOVA2,NR3C1,NR4A2,PTCH1,RAPGEF3,RARA,S1PR1,SOX11,TGIF1,TNF,TNFRSF21,TPCN2,WDR1,ZNF335	44
	Cellular Movement	Migration of cells	6.2e-09		1.288	ACKR2,ACTN1,ACTN4,ADAMTS1,ADARB1,AHR,ANGPT2,ANGPTL4,ATF2,ATF3,AXIN2,BANP,BCAR3,BCL2L1,Brd4,BTG2,CASS4,CCL3L3,CCL5,CCN1,CCNT1,CD36,CD47,CDC42EP3,CDKN1A,CDKN1B,CNR1,CORO1C,CRTC2,CSK,CXCL2,CXCL6,DACT1,DAPK3,DBNL,DEK,DLGAP4,DNAJA3,DPYSL2,DUSP5,EFNB1,EGR3,EHF,FAM107A,FGF7,FOSL2,FOXO3,Foxp1,GATA2,GATA3,GATA5,GATA6,GDNF,GLUL,GPM6A,HAS1,HCAR2,HES1,HEY1,HHEX,HIC1,HLX,HSPA1A/HSPA1B,INSR,KLF15,KLF2,KLF4,KLF…	129
	Cell Death and Survival,Organismal Injury and Abnormalities	Apoptosis of fibroblast cell lines	2.3e-08		1.256	AHR,ATF2,ATF3,AXIN1,BANP,BCL2L1,BNIP3L,CASP3,CCN1,CDKN1A,CDKN1B,DAPK3,EP400,FOXO3,GLP1R,IER3,MAP3K1,MYC,PPP6R1,PRKAA2,REL,RNF31,SIRT1,STK17B,STK4,SYK,TNF,UNC5C,ZC3H12A	29
	Cancer,Dermatological Diseases and Conditions,Organismal Injury and Abnormalities	Skin cancer	7.73e-09		1.216	ABCF1,ABTB2,ACIN1,ACKR2,ACTN1,ACTN4,ADAMTS1,ADAMTS15,ADAMTSL2,ADAP2,ADARB1,ADRA1A,AEN,AHDC1,AHR,AMMECR1L,AMOTL2,ANGPTL4,ANKRD11,AP3D1,ARFGAP2,ARL4D,ASB3/GPR75-ASB3,ATF2,ATF3,ATP1A1,ATP7B,AXIN1,AXIN2,BAIAP2,BCAR3,BCLAF3,BYSL,C17orf80,C6orf62,CAMTA2,CAPN15,CARM1,CASKIN2,CASP3,CASS4,CCNG2,CCNT1,CD36,CD47,CDC42EP3,CDKN1A,CHERP,CHST8,CISH,CLK2,CNKSR3,CNR1,CORO1C,CPSF1,CREB3L4,CREBBP,CREBRF,CRTC2,CSK,C…	314
	Cellular Development,Nervous System Development and Function,Tissue Development	Differentiation of neurons	9.16e-06		1.202	BCL2L1,BNIP3L,BTG2,CCL5,CDKN1B,CDON,CNR1,DIXDC1,DPYSL2,EFNB1,EIF4ENIF1,FGF7,FOXO3,GATA2,GATA3,GDNF,HES1,HEY1,HSPA1A/HSPA1B,KLF6,KLF9,LNX2,MYC,NOVA2,NR4A2,RARA,S1PR1,SOX11,TGIF1,ZNF335	30
	Respiratory System Development and Function	Respiratory system development	1.31e-06		1.195	AHR,ATF2,CDKN1A,CREBBP,CXCL2,DBNL,FGF7,Foxp1,GAK,GATA3,GATA6,HES1,HLX,HOXA5,KLF2,LFNG,NR3C1,PTCH1,PTGER4,RARA,RC3H1,REL,SIRT1,SOX11,SP1,SPRY4,STK4,SYK,TNF	29
	Embryonic Development,Organ Development,Organismal Development,Respiratory System Development and Function,Tissue Development	Formation of lung	3.35e-06		1.195	ATF2,CDKN1A,CREBBP,CXCL2,DBNL,FGF7,Foxp1,GAK,GATA6,HES1,HLX,HOXA5,KLF2,LFNG,NR3C1,PTGER4,RARA,RC3H1,REL,SIRT1,SOX11,SP1,SPRY4,STK4,SYK,TNF	26
	Gene Expression	Transcription of RNA	4.8e-22		1.149	ACTN4,AHR,AP3D1,ATF2,ATF3,AXIN1,BANP,BCL2L1,BTG1,BTG2,BTG3,CAMTA2,CARM1,CBX4,CCL3L3,CCN1,CCNT1,CD36,CDKN1A,CDKN1B,CDON,CISH,CREB3L4,CREBBP,CREBRF,CRTC2,CSRNP2,CXXC1,DACT1,DAPK3,DEK,DGKQ,DIXDC1,DNAJA3,DUSP5,E4F1,EGR3,EHF,FGF7,FOSL2,FOXO3,Foxp1,FOXP4,GATA2,GATA3,GATA5,GATA6,GATAD2A,GDNF,GLP1R,Gm4924,GPS2,GTF2A1,HES1,HEY1,HHEX,HIC1,HIRA,HOXA5,HSF2,HSPA1A/HSPA1B,INSR,JDP2,KAT2B,KDM5C,KLF10,KLF13,KLF1…	132
	Cardiovascular System Development and Function,Cellular Development,Cellular Function and Maintenance,Cellular Growth and Proliferation,Organismal Development,Tissue Development	Proliferation of endothelial cells	4.56e-08		1.126	ADAMTS1,ANGPT2,ANGPTL4,C1GALT1C1,CD36,CDKN1A,CDKN1B,CRTC2,EGR3,FGF7,FOXO3,GATA6,HEY1,HHEX,KCNJ2,KLF2,MYC,NR4A1,NR4A2,NRARP,NRP2,PFKFB3,PRKD2,PTGS2,RGCC,SEMA6B,SIRT1,SP1,SPRY4,TNF,UBA1	31
	Embryonic Development,Organismal Development,Tissue Development	Morphogenesis of embryonic tissue	9.85e-06		1.109	ATF2,DACT1,FGF7,FOXP4,GATA3,GDNF,HES1,HEY1,INSR,MEOX2,MYC,OSR1,PTCH1,RARA,SOX11	15
	Cell Death and Survival,Organismal Injury and Abnormalities	Cell death of tumor cell lines	5.56e-13		1.106	ACTN4,AHR,AKAP7,ANGPT2,ANGPTL4,ATF2,ATF3,ATP1A1,AXIN1,AXIN2,BANP,BCL2L1,BNIP3L,BTG1,BTG2,BTG3,C1GALT1C1,CASP3,CCN1,CD47,CDC42EP3,CDKN1A,CDKN1B,CDON,Clec2d (includes others),CNR1,CREBBP,CRTC2,DAPK3,DCTN1,DEK,DNAJA3,DYNC1H1,E4F1,EGR3,EHF,EVA1C,FBXO32,FGF7,FKBP5,FOXO3,G0S2,GATA2,GATA5,GATA6,GDNF,GLP1R,GPM6A,GPS2,HAS1,HCAR2,HERPUD1,HES1,HIC1,HOXA5,HSPA1A/HSPA1B,IER3,INSR,INTS3,KAT2B,KLF10,KLF2,KLF4,K…	116
	Tissue Morphology	Quantity of epithelial cells	4.58e-06		1.097	AHR,CDKN1A,CDKN1B,EFNB1,FGF7,GATA6,GDNF,HES1,HOXA5,HSF2,KLF4,MYC,NR3C1,PTGER2,RARA,STK4,TNF	17
	Cancer,Organismal Injury and Abnormalities	Breast or pancreatic cancer	1.35e-12		1.091	ABCF1,ABTB2,ACIN1,ACTN4,ADAMTS1,ADAMTS15,ADARB1,AHDC1,AHR,AKAP7,AMOTL2,ANAPC13,ANGPT2,ANGPTL4,ANKRD11,AP3D1,ASB3/GPR75-ASB3,ATF2,ATF3,ATP1A1,ATP7B,AXIN2,BAIAP2,BCAR3,BCL2L1,BTG2,C17orf80,C1GALT1C1,CAMTA2,CARM1,CASKIN2,CASP3,CASS4,CBX4,CCL3L3,CCL5,CCN1,CCNG2,CCNL1,CCNT1,CD36,CD47,CDC42EP3,CDKN1A,CDKN1B,CDON,CHERP,CHST8,CLK1,CLK2,CNKSR3,CPSF1,CREB3L4,CREBBP,CREBRF,CTDP1,CXCL2,CXCL6,DACT1,DAPK3,DBNL…	247
	Cellular Development,Embryonic Development,Hair and Skin Development and Function,Organ Development,Organismal Development,Tissue Development	Differentiation of skin	6.84e-08		1.046	CASP3,CDKN1A,FGF7,GAK,GATA3,GATA6,INSR,KLF4,KLF7,MYC,MYH9,NFKBIZ,NR3C1,PTCH1,PTCH2,PTGS2,RND3,RNF144B,STK4,TNF,ZFP36L1	21
	Cellular Development,Connective Tissue Development and Function,Tissue Development	Differentiation of connective tissue cells	7.06e-12		1.041	AHR,ATF2,ATF3,AXIN1,AXIN2,CARM1,CASP3,CCL3L3,CCL5,CCN1,CD47,CDKN1A,Clec2d (includes others),DACT1,EFNB1,FOSL2,FOXO3,GATA2,GATA3,GATA6,GDNF,GPS2,HES1,HEY1,HIRA,INSIG1,INSR,JDP2,KLF10,KLF15,KLF4,MYC,NFKBIZ,NR3C1,NR4A1,NR4A2,OSR1,PER2,PTCH1,PTGER2,PTGER4,PTGS2,RAPGEF3,RARA,RASSF2,RGS2,RUNX1T1,SIRT1,SOX11,STK4,SYK,TENT5A,TGIF1,TNF,TOB1,ZC3H12A,ZFP36L1	57
	Carbohydrate Metabolism	Synthesis of carbohydrate	7.95e-06		1.024	ADRA1A,Agtr1b,ALG6,B4GALT4,CCL5,CD36,CEPT1,CHST8,CREBBP,DGKQ,FGF7,Foxp1,G0S2,GLP1R,GPAT4,HAS1,INSR,MYC,NHLRC1,NR4A1,NR4A2,PER2,PITPNM1,PLSCR1,PRKAA2,PTGER4,RGS2,S1PR1,SIRT1,SLC25A25,ST3GAL4,SYK,TNF,USP10	34
	Gene Expression	Expression of RNA	1.06e-22		1.017	ABCF1,ACTN4,AHR,AP3D1,ATF2,ATF3,AXIN1,BANP,BCL2L1,BTG1,BTG2,BTG3,CAMTA2,CARM1,CBX4,CCL3L3,CCL5,CCN1,CCNT1,CD36,CD47,CDKN1A,CDKN1B,CDON,CISH,CREB3L4,CREBBP,CREBRF,CRTC2,CSRNP2,CXXC1,DACT1,DAPK3,DDX54,DEK,DGKQ,DIXDC1,DNAJA3,DUSP5,E4F1,EGR3,EHF,EIF4A2,EIF4ENIF1,EPRS1,FGF7,FOSL2,FOXO3,Foxp1,FOXP4,GATA2,GATA3,GATA5,GATA6,GATAD2A,GDNF,GEMIN5,GLP1R,Gm4924,GPS2,GTF2A1,HES1,HEY1,HHEX,HIC1,HIRA,HOXA5,HSF2,…	156
	Cellular Development,Cellular Growth and Proliferation	Colony formation of cells	7.01e-10		1.01	AHR,ATF2,ATF3,BCL2L1,BNIP3L,CCL3L3,CCN1,CCNG2,CDKN1A,CDKN1B,CREBBP,DNAJA3,DUSP5,DYNC1H1,EHF,EP400,FOXO3,GDNF,HCAR2,HES1,HOXA5,HSPA1A/HSPA1B,INSR,KAT2B,KLF2,KLF4,KLF6,MAP3K1,MYC,NR4A1,PELP1,PHLDA1,PLSCR1,PTCH1,PTGS2,RAPGEF1,RASSF2,RNF144B,RRAD,SAFB,SIRT1,SP1,SPRY1,SPRY4,STK4,SYK,TNF,TPD52,UNC5C	49
	Cellular Development,Skeletal and Muscular System Development and Function,Tissue Development	Differentiation of muscle	2.94e-06		1.007	ANGPT2,ATF2,ATF3,BTG1,BTG2,CASP3,CDKN1A,CDON,FEM1C,FOXO3,Foxp1,GATA6,HIRA,JDP2,MYC,NR4A1,NR4A2,OGN,PRKD2,RARA,RIPK2,Sik1,SIRT1,SOX11,SP1,STK4,TNF,ZFP36L1	28
	Cancer,Dermatological Diseases and Conditions,Organismal Injury and Abnormalities	Skin tumor	6.49e-09		1.006	ABCF1,ABTB2,ACIN1,ACKR2,ACTN1,ACTN4,ADAMTS1,ADAMTS15,ADAMTSL2,ADAP2,ADARB1,ADRA1A,AEN,AHDC1,AHR,AMMECR1L,AMOTL2,ANGPTL4,ANKRD11,AP3D1,ARFGAP2,ARL4D,ASB3/GPR75-ASB3,ATF2,ATF3,ATP1A1,ATP7B,AXIN1,AXIN2,BAIAP2,BCAR3,BCL2L1,BCLAF3,BYSL,C17orf80,C6orf62,CAMTA2,CAPN15,CARM1,CASKIN2,CASP3,CASS4,CCNG2,CCNT1,CD36,CD47,CDC42EP3,CDKN1A,CHERP,CHST8,CISH,CLK2,CNKSR3,CNR1,CORO1C,CPSF1,CREB3L4,CREBBP,CREBRF,CRTC…	315
	Cell Cycle,Connective Tissue Development and Function	G1 phase of fibroblast cell lines	1.41e-06		1	ADRA1A,BOP1,CARM1,CDKN1A,CDKN1B,E4F1,EP400,FOXO3,KLF6,MYC,SIRT1	11
	Cancer,Organismal Injury and Abnormalities	Neoplasia of cells	2.31e-10		0.995	ABCF1,ABTB2,ACIN1,ACKR2,ACTN4,ADAMTS1,ADAMTS15,ADAMTSL2,ADARB1,ADRA1A,AEN,AHR,AKAP7,AMMECR1L,ANGPT2,ANGPTL4,ANKRD11,AP3D1,AP5B1,ASB3/GPR75-ASB3,ATF2,ATF3,ATP1A1,AXIN1,AXIN2,BANP,BCAR3,BCL2L1,BNIP3L,BOP1,Brd4,BTG1,BTG2,C17orf80,C1GALT1C1,CAMTA2,CASP3,CBX4,CCL5,CCN1,CCNG2,CCNL1,CCNT1,CD36,CD47,CDC42EP3,CDKN1A,CDKN1B,CDON,CHERP,CHIC1,CHST8,CLK1,CNR1,CPSF1,CREB3L4,CREBBP,CSK,CWF19L2,CXCL2,CXCL6,CXXC1…	266
	Cell Death and Survival,Organismal Injury and Abnormalities	Necrosis	1.77e-14		0.951	ACTN4,ADAMTS1,ADARB1,ADRA1A,Agtr1b,AHR,AKAP7,ANGPT2,ANGPTL4,ATF2,ATF3,ATP1A1,ATP7B,AXIN1,AXIN2,BANP,BCL2L1,BNIP3L,Brd4,BTG1,BTG2,BTG3,C1GALT1C1,C9orf72,CASP3,CCL3L3,CCL5,CCN1,CCNT1,CD36,CD47,CDC42EP3,CDKN1A,CDKN1B,CDON,CISH,Clec2d (includes others),CLK2,CNR1,CREBBP,CRTC2,CSK,CXCL2,DAPK3,DCTN1,DEK,DLST,DNAJA3,DUSP5,DYNC1H1,E4F1,EFNB1,EGR3,EHF,EP400,EPRS1,EVA1C,FBXO32,FGF7,FKBP5,FOXO3,Foxp1,G0S2,GA…	169
	Cell Death and Survival,Organismal Injury and Abnormalities	Apoptosis of connective tissue cells	1.42e-06		0.924	AHR,ATF2,ATF3,BCL2L1,CASP3,CD36,CDKN1A,CDKN1B,CNR1,FOXO3,HAS1,INSR,KLF2,KSR1,MAP3K1,MBD4,MYC,NR4A1,OGN,REL,S1PR1,SIRT1,STK4,SYVN1,TNF	25
	Connective Tissue Development and Function,Tissue Development	Growth of connective tissue	1.26e-07		0.915	ADAMTSL2,AHR,ATF2,ATF3,AXIN2,BCL2L1,CCN1,CCNG2,CDKN1A,CDKN1B,Clec2d (includes others),CNR1,CSK,EP400,FGF7,FOSL2,GATA2,GATA3,HOXA5,HSPA1A/HSPA1B,INSR,KLF10,KLF4,KLF9,KSR1,MAP3K1,MYC,NFKBIZ,NR3C1,OGN,PER2,PFKFB3,PHC2,PLK2,PRKD2,PTCH1,PTGER2,PTGS2,RAPGEF1,REL,RNF144B,SAFB,SIRT1,STAG1,TGIF1,TIFA,TNF,ZFP36L1	48
	Cardiovascular System Development and Function,Cellular Development,Cellular Function and Maintenance,Cellular Growth and Proliferation,Organismal Development,Tissue Development	Cell proliferation of vascular endothelial cells	6.6e-06		0.903	ANGPT2,C1GALT1C1,CDKN1A,CDKN1B,EGR3,FOXO3,GATA6,HHEX,KLF2,NR4A1,NR4A2,NRARP,NRP2,PRKD2,SEMA6B,SP1,SPRY4,TNF	18
	Cellular Development	Differentiation of lymphoma cell lines	2.64e-06		0.896	BTG2,CDKN1A,MBD1,MYC,PLSCR1,RUNX1T1,SOX11,TNF	8
	Cellular Movement	Cell movement	4.69e-09		0.893	ACKR2,ACTN1,ACTN4,ADAMTS1,ADARB1,AHR,ANGPT2,ANGPTL4,ATF2,ATF3,AXIN2,BAIAP2,BANP,BCAR3,BCL2L1,Brd4,BTG1,BTG2,CASS4,CCL3L3,CCL5,CCN1,CCNT1,CD36,CD47,CDC42EP3,CDC42EP4,CDKN1A,CDKN1B,CNR1,CORO1C,CRTC2,CSK,CXCL2,CXCL6,DACT1,DAPK3,DBNL,DEK,DLGAP4,DNAJA3,DNAJB4,DPYSL2,DUSP5,EFNB1,EGR3,EHF,FAM107A,FGF7,FOSL2,FOXO3,Foxp1,GATA2,GATA3,GATA5,GATA6,GDNF,GEMIN5,GLUL,GPM6A,HAS1,HCAR2,HES1,HEY1,HHEX,HIC1,HLX,HSP…	139
	Cancer,Cell Death and Survival,Organismal Injury and Abnormalities,Tumor Morphology	Cell death of cancer cells	2.19e-06		0.891	ATF2,ATF3,ATP7B,BCL2L1,CASP3,CCN1,CD47,CDKN1A,CDKN1B,HES1,HSPA1A/HSPA1B,KLF10,MAP3K1,MYC,NR3C1,NR4A1,NR4A2,NUP188,PHLDA1,PRKAA2,PTGS2,RARA,REL,RND3,SF3A1,SIRT1,SOX11,SYK,TNF	29
	Cell-mediated Immune Response,Cellular Development,Cellular Function and Maintenance,Cellular Growth and Proliferation,Embryonic Development,Hematological System Development and Function,Hematopoiesis,Lymphoid Tissue Structure and Development,Organ Development,Organismal Development,Tissue Development	Differentiation of helper T lymphocytes	2.05e-07		0.885	AHR,CCL5,CCN1,CDKN1B,CISH,EFNB1,EGR3,Foxp1,GATA2,GATA3,HLX,KLF10,KLF4,LFNG,NFKBIZ,NR4A2,PTGER4,RC3H1,REL,RGCC,RIPK2,TNF	22
	Cellular Growth and Proliferation,Connective Tissue Development and Function,Tissue Development	Proliferation of connective tissue cells	3.91e-08		0.844	ADAMTSL2,AHR,ATF2,ATF3,AXIN2,BCL2L1,CCN1,CCNG2,CDKN1A,CDKN1B,Clec2d (includes others),CNR1,CSK,EP400,FGF7,FOSL2,GATA2,GATA3,HOXA5,HSPA1A/HSPA1B,INSR,KLF10,KLF4,KLF9,KSR1,MAP3K1,MYC,NFKBIZ,NR3C1,OGN,PER2,PFKFB3,PHC2,PLK2,PRKD2,PTCH1,PTGER2,PTGS2,RAPGEF1,REL,RNF144B,SAFB,SIRT1,STAG1,TGIF1,TNF,ZFP36L1	47
	Cell Death and Survival,Organismal Injury and Abnormalities	Cell death of blood cells	9.47e-10		0.834	AHR,ANGPT2,ATF2,ATF3,BCL2L1,BNIP3L,Brd4,BTG1,CASP3,CCL3L3,CCL5,CD47,CDKN1A,CDKN1B,CISH,CNR1,CREBBP,CXCL2,DEK,DNAJA3,DUSP5,EFNB1,EGR3,FOXO3,Foxp1,GATA2,GATA3,HCAR2,HES1,IER3,INSR,KLF13,KLF2,KLF4,MYC,NQO2,NR3C1,NR4A1,POLR3E,PRF1,PRKD2,PTGER4,REL,RNF31,S1PR1,SIRT1,SP1,STK17B,STK4,SYK,SYVN1,TLN1,TNF,TNFRSF21	54
	Cell Death and Survival,Organismal Injury and Abnormalities	Apoptosis of fibroblasts	2.03e-08		0.822	AHR,ATF2,ATF3,BCL2L1,CASP3,CDKN1A,CDKN1B,CNR1,FOXO3,HAS1,INSR,KLF2,KSR1,MAP3K1,MBD4,MYC,NR4A1,OGN,REL,S1PR1,SIRT1,STK4,SYVN1,TNF	24
	Cellular Development,Skeletal and Muscular System Development and Function,Tissue Development	Differentiation of muscle cells	1.11e-06		0.813	ANGPT2,ATF2,ATF3,BTG1,BTG2,CASP3,CDKN1A,CDON,FOXO3,Foxp1,GATA6,HIRA,JDP2,MYC,NR4A1,NR4A2,OGN,PRKD2,RARA,RIPK2,Sik1,SIRT1,SOX11,SP1,STK4,TNF,ZFP36L1	27
	Cancer,Cell Death and Survival,Organismal Injury and Abnormalities,Tumor Morphology	Necrosis of tumor	2.98e-07		0.798	ANGPT2,ATF2,ATF3,ATP7B,BCL2L1,BTG1,CASP3,CCN1,CD47,CDKN1A,CDKN1B,HES1,HSPA1A/HSPA1B,INSR,KLF10,KSR1,MAP3K1,MYC,NR3C1,NR4A1,NR4A2,NUP188,PHLDA1,PRKAA2,PTGER2,PTGS2,RARA,REL,RND3,SF3A1,SIRT1,SOX11,SYK,TNF,TNFRSF21	35
	Cancer,Cell Death and Survival,Organismal Injury and Abnormalities,Tumor Morphology	Cell death of tumor cells	1.41e-06		0.798	ATF2,ATF3,ATP7B,BCL2L1,CASP3,CCN1,CD47,CDKN1A,CDKN1B,HES1,HSPA1A/HSPA1B,INSR,KLF10,KSR1,MAP3K1,MYC,NR3C1,NR4A1,NR4A2,NUP188,PHLDA1,PRKAA2,PTGER2,PTGS2,RARA,REL,RND3,SF3A1,SIRT1,SOX11,SYK,TNF,TNFRSF21	33
	Cancer,Organismal Injury and Abnormalities	Metastasis	6.86e-07		0.783	ACKR2,ACTN4,ADAMTS1,ANGPT2,ANGPTL4,ATF3,AXIN2,BCL2L1,CASP3,CCL5,CCN1,CD36,CD47,CDKN1A,CDKN1B,CREBBP,CXCL2,CXCL6,DACT1,DPYSL2,ERCC5,FOXO3,Foxp1,GATA2,GATA3,GATA6,GGPS1,GLUL,HCAR2,HIC1,HLX,HSPA1A/HSPA1B,INSR,KCNJ2,KLF4,KLF6,KLF7,KLF9,LIMK1,MAP3K1,MED12,MYC,MYH9,NR3C1,NRP2,PFKFB4,PIK3R5,PLSCR4,PRF1,PTCH1,PTCH2,PTGER2,PTGS2,RARA,RIPK2,RNF144B,S1PR1,SCRIB,SERTAD2,SIRT1,SLC38A6,SOX11,SP1,SYK,TET1,TLN1,…	72
	Cancer,Organismal Injury and Abnormalities	Melanoma	3.02e-10		0.776	ABCF1,ABTB2,ACIN1,ACKR2,ACTN1,ACTN4,ADAMTS1,ADAMTS15,ADAMTSL2,ADAP2,ADARB1,ADRA1A,AEN,AHDC1,AHR,AMMECR1L,AMOTL2,ANKRD11,AP3D1,ARFGAP2,ARL4D,ASB3/GPR75-ASB3,ATF2,ATF3,ATP1A1,ATP7B,AXIN1,AXIN2,BCAR3,BCL2L1,BCLAF3,BNIP3L,BTG3,BYSL,C17orf80,C6orf62,CAMTA2,CAPN15,CARM1,CASKIN2,CASP3,CASS4,CBX4,CCNT1,CD36,CD47,CDC42EP3,CDC42EP4,CDKN1B,CHERP,CHST8,CISH,CLK1,CLK2,CNKSR3,CNR1,CORO1C,CPSF1,CREB3L4,CREBBP,C…	324
	Cellular Development,Connective Tissue Development and Function	Adipogenesis of fibroblast cell lines	5.86e-07		0.776	AHR,GATA3,GLP1R,GPS2,KLF10,KLF6,LPIN2,NR3C1,NR4A1,NR4A2,TNF,ZC3H12A	12
	Cell Death and Survival,Organismal Injury and Abnormalities	Apoptosis of tumor cell lines	3.08e-10		0.769	ACTN4,AHR,ANGPT2,ANGPTL4,ATF2,ATF3,ATP1A1,AXIN1,AXIN2,BANP,BCL2L1,BNIP3L,BTG2,C1GALT1C1,CASP3,CCN1,CD47,CDC42EP3,CDKN1A,CDKN1B,CDON,CNR1,CREBBP,CRTC2,DAPK3,DNAJA3,DYNC1H1,EGR3,EHF,EVA1C,FBXO32,FKBP5,FOXO3,G0S2,GATA2,GATA5,GATA6,GDNF,GLP1R,GPS2,HAS1,HCAR2,HES1,HIC1,HOXA5,HSPA1A/HSPA1B,IER3,INSR,KAT2B,KLF10,KLF2,KLF4,KLF6,KLF9,KSR1,MAP3K1,MED12,MYBBP1A,MYC,MYCT1,NACC1,NFKBIZ,NOVA2,NR3C1,NR4A1,NR4A2…	93
	Gene Expression	Transcription	7.53e-21		0.737	ACTN4,AHR,AP3D1,ATF2,ATF3,AXIN1,BANP,BCL2L1,BTG1,BTG2,BTG3,CAMTA2,CARM1,CBX4,CCL3L3,CCL5,CCN1,CCNT1,CD36,CDKN1A,CDKN1B,CDON,CISH,CREB3L4,CREBBP,CREBRF,CRTC2,CSRNP2,CXXC1,DACT1,DAPK3,DEK,DGKQ,DIXDC1,DNAJA3,DUSP5,E4F1,EGR3,EHF,ERCC5,FGF7,FOSL2,FOXO3,Foxp1,FOXP4,GATA2,GATA3,GATA5,GATA6,GATAD2A,GDNF,GLP1R,Gm4924,GPS2,GTF2A1,HES1,HEY1,HHEX,HIC1,HIRA,HOXA5,HSF2,HSPA1A/HSPA1B,INSR,JDP2,Kantr,KAT2B,KDM5C…	146
	Cancer,Organismal Injury and Abnormalities	Invasive cancer	2.35e-07		0.733	ACKR2,ACTN4,ADAMTS1,ANGPT2,ANGPTL4,ATF3,AXIN1,AXIN2,BCL2L1,CASP3,CCL5,CCN1,CD36,CD47,CDC42EP3,CDKN1A,CDKN1B,CPSF1,CREBBP,CTDP1,CXCL2,CXCL6,DACT1,DIXDC1,DPYSL2,ERCC5,FGF7,FOXO3,Foxp1,G0S2,GATA2,GATA3,GATA6,GGPS1,GLUL,HCAR2,HIC1,HLX,HSPA1A/HSPA1B,IER3,INSR,KCNJ2,KLF4,KLF6,KLF7,KLF9,LIMK1,MAP3K1,MED12,MYC,MYH9,NFKBIZ,NMT2,NR3C1,NR4A2,NRP2,OSR1,PFKFB4,PHRF1,PIK3R5,PLSCR4,PRF1,PTCH1,PTCH2,PTGER2,PTGS2…	88
	Cancer,Organismal Injury and Abnormalities	Invasive tumor	1.23e-07		0.732	ACKR2,ACTN4,ADAMTS1,ANGPT2,ANGPTL4,ATF3,AXIN1,AXIN2,BCL2L1,CASP3,CCL5,CCN1,CD36,CD47,CDC42EP3,CDKN1A,CDKN1B,CPSF1,CREBBP,CTDP1,CXCL2,CXCL6,DACT1,DIXDC1,DPYSL2,ERCC5,FAM107A,FGF7,FOXO3,Foxp1,G0S2,GATA2,GATA3,GATA6,GGPS1,GLUL,HCAR2,HIC1,HLX,HSPA1A/HSPA1B,IER3,INSR,KCNJ2,KLF4,KLF6,KLF7,KLF9,LIMK1,MAP3K1,MED12,MYC,MYH9,NFKBIZ,NMT2,NR3C1,NR4A2,NRP2,OSR1,PFKFB4,PHRF1,PIK3R5,PLSCR4,PRF1,PTCH1,PTCH2,PTGE…	89
	Endocrine System Development and Function,Molecular Transport,Small Molecule Biochemistry	Concentration of hormone	2.66e-06		0.732	AHR,CD36,CDKN1A,CDKN1B,CHST8,Clec2d (includes others),CNR1,CRTC2,FOXO3,GATA6,GLP1R,HOXA5,INSR,JDP2,KDM5C,LRIG3,NR3C1,NUCKS1,POLG,PRKAA2,PTGS2,RAPGEF3,SAFB,SERP1,SGMS1,Sik1,SIRT1,SP1,ST3GAL4,TNF	30
	Cell Death and Survival	Cell death of lymphoid organ	3.62e-06		0.714	AHR,ATF3,BCL2L1,BNIP3L,CASP3,CDKN1A,DNAJA3,EFNB1,EGR3,KLF13,MYC,NQO2,NR3C1,NR4A1,POLR3E,REL,TNF	17
	Cellular Growth and Proliferation,Embryonic Development,Nervous System Development and Function,Organ Development,Organismal Development,Tissue Development	Proliferation of brain cells	7.41e-08		0.711	AHR,BTG2,CDKN1A,CDKN1B,CDON,CNR1,DLGAP4,FOXO3,GAK,GATA2,GDNF,GNG5,HES1,KLF4,LIMS2,LNX2,RAPGEF1,SOX11	18
	Cellular Development,Cellular Growth and Proliferation,Embryonic Development,Nervous System Development and Function,Organ Development,Organismal Development,Tissue Development	Proliferation of neural precursor cells	4.7e-08		0.707	AHR,BTG2,CDKN1A,CDON,CNR1,DLGAP4,FOXO3,GAK,GATA2,GNG5,HES1,KLF4,LIMS2,LNX2,RAPGEF1,SOX11	16
	Cardiovascular System Development and Function	Development of vasculature	1.36e-13		0.685	ACTN4,ADAMTS1,ADRA1A,Agtr1b,AHR,ANGPT2,ANGPTL4,ATF2,ATF3,BTG1,C1GALT1C1,CASP3,CCL5,CCN1,CD36,CDKN1A,CDKN1B,CDON,CNR1,CREBBP,CRTC2,CSK,CXCL2,CXCL6,DIXDC1,E4F1,EFNB1,EGR3,FGF7,FOXO3,GATA2,GATA5,GATA6,GATAD2A,GDNF,GLUL,HAS1,HES1,HEY1,HHEX,HIRA,HLX,HOXA5,INSR,KCNJ2,KLF10,KLF2,KLF4,KLF6,KLF7,LFNG,MEOX2,MYC,MYH9,NQO2,NR3C1,NR4A1,NR4A2,NRARP,NRP2,PER2,PFKFB3,PRKD2,PTCH1,PTGER2,PTGER4,PTGS2,PTPRB,RAPGEF1…	88
	Cardiovascular System Development and Function,Organismal Development,Tissue Development	Angiogenesis	1.68e-13		0.684	ADAMTS1,Agtr1b,AHR,ANGPT2,ANGPTL4,ATF2,ATF3,BTG1,C1GALT1C1,CASP3,CCL5,CCN1,CD36,CDKN1A,CDKN1B,CNR1,CREBBP,CRTC2,CSK,CXCL2,CXCL6,DIXDC1,E4F1,EFNB1,EGR3,FGF7,FOXO3,GATA2,GATA5,GATA6,GATAD2A,GDNF,GLUL,HAS1,HES1,HEY1,HHEX,HIRA,HLX,HOXA5,INSR,KCNJ2,KLF10,KLF2,KLF4,KLF6,KLF7,MEOX2,MYC,MYH9,NQO2,NR3C1,NR4A1,NR4A2,NRARP,NRP2,PFKFB3,PRKD2,PTCH1,PTGER2,PTGER4,PTGS2,PTPRB,RAPGEF1,RAPGEF3,RARA,RGCC,RGS2,RND3…	82
	Embryonic Development,Organismal Development,Tissue Development	Growth of embryonic tissue	1.29e-06		0.682	AHR,BTG2,CDKN1A,CDKN1B,CDON,CNR1,DLGAP4,EFNB1,FGF7,FOXO3,Foxp1,GAK,GATA2,GNG5,HES1,INSR,KLF4,LIMS2,LNX2,MYC,PTCH1,PTGS2,RAPGEF1,S1PR1,SOX11,ZNF335	26
	Cellular Development,Cellular Growth and Proliferation	Development of tumor cell lines	6.08e-08		0.672	AHR,ATF2,ATF3,BCL2L1,CCN1,CCNG2,CDKN1A,CDKN1B,DNAJA3,DUSP5,DYNC1H1,EHF,FOXO3,GDNF,GLUL,HCAR2,HES1,HSPA1A/HSPA1B,INSR,JDP2,KLF2,KLF4,KLF6,LIMK1,MAP3K1,MYC,NR4A1,PELP1,PTGS2,RNF144B,RRAD,SP1,SPRY1,SPRY4,STK4,SYK,TNF,TPD52,UNC5C	39
	Cancer,Organismal Injury and Abnormalities	Advanced malignant tumor	3.78e-07		0.666	ACKR2,ACTN4,ADAMTS1,ANGPT2,ANGPTL4,ATF3,AXIN2,BCL2L1,BTG1,CASP3,CCL5,CCN1,CD36,CD47,CDKN1A,CDKN1B,CREBBP,CSK,CXCL2,CXCL6,DACT1,DPYSL2,ERCC5,FOXO3,Foxp1,GATA2,GATA3,GATA6,GGPS1,GLUL,HCAR2,HES1,HIC1,HLX,HSPA1A/HSPA1B,INSR,KAT2B,KCNJ2,KLF4,KLF6,KLF7,KLF9,LIMK1,MAP3K1,MED12,MYC,MYH9,NR3C1,NRP2,PFKFB4,PIK3R5,PLSCR4,PRF1,PTCH1,PTCH2,PTGER2,PTGS2,RARA,RGCC,RIPK2,RNF144B,S1PR1,SCRIB,SERTAD2,SIRT1,SLC38A6…	77
	Embryonic Development,Hair and Skin Development and Function,Organ Development,Organismal Development,Tissue Development	Formation of skin	7.52e-06		0.664	ACKR2,AHDC1,CASP3,CDKN1A,DNASE1L2,FGF7,FOSL2,GAK,GATA3,GATA6,INSR,KLF4,KLF7,KSR1,MYC,MYH9,NFKBIZ,NR3C1,PTCH1,PTCH2,PTGER2,PTGS2,RND3,RNF144B,STK4,TNF,TNFRSF19,ZFP36L1	28
	Cancer,Endocrine System Disorders,Organismal Injury and Abnormalities	Endocrine gland tumor	2.08e-13		0.642	ABCF1,ABTB2,ACIN1,ACTN1,ACTN4,ADAMTS1,ADAMTS15,ADAMTSL2,ADAP2,ADARB1,ADRA1A,AEN,AHDC1,AHR,AKAP7,ALG6,AMMECR1L,AMOTL2,ANGPT2,ANGPTL4,ANKRD11,AP3D1,AP3M1,AP5B1,ARFGAP1,ARFGAP2,ASB3/GPR75-ASB3,ATF2,ATP1A1,ATP7B,AXIN1,AXIN2,BAIAP2,BANP,BCAP29,BCAR3,BCL2L1,BCLAF3,BTG1,BTG2,BTG3,BYSL,C17orf80,C1GALT1C1,C9orf40,C9orf72,CAMTA2,CAPN15,CARM1,CASKIN2,CASP3,CASS4,CBX4,CCN1,CCNL1,CCNT1,CD36,CD47,CDC42EP3,CDC4…	366
	Cell Death and Survival,Organismal Injury and Abnormalities	Cell death of immune cells	1.44e-08		0.639	AHR,ANGPT2,ATF3,BCL2L1,Brd4,BTG1,CASP3,CCL5,CD47,CDKN1A,CDKN1B,CISH,CNR1,CXCL2,DEK,DNAJA3,DUSP5,EFNB1,EGR3,FOXO3,Foxp1,GATA3,HCAR2,HES1,IER3,INSR,KLF13,KLF2,KLF4,MYC,NQO2,NR3C1,NR4A1,POLR3E,PRF1,PRKD2,PTGER4,REL,RNF31,S1PR1,SIRT1,SP1,STK17B,STK4,SYK,SYVN1,TLN1,TNF,TNFRSF21	49
	Tissue Development	Formation of gland	2.94e-06		0.616	ADAMTS1,AHR,ATP7B,AXIN1,CDKN1B,CISH,FGF7,GATA3,GLP1R,GPAT4,INSR,KLF6,LIMK1,NR3C1,PELP1,PTCH1,PTGER2,PTGS2,SCRIB,SIRT1,TNF	21
	Cell Death and Survival,Organismal Injury and Abnormalities	Cell death of hematopoietic progenitor cells	7.92e-07		0.603	ATF3,BCL2L1,BNIP3L,CASP3,CCL5,CDKN1A,CREBBP,DNAJA3,EFNB1,EGR3,GATA2,KLF13,KLF2,KLF4,MYC,NQO2,NR3C1,NR4A1,POLR3E,PRF1,REL,TNF	22
	Cancer,Organismal Injury and Abnormalities	Cancer	2.44e-20		0.587	ABCF1,ABTB2,ACIN1,ACKR2,ACTN1,ACTN4,ADAMTS1,ADAMTS15,ADAMTSL2,ADAP2,ADARB1,ADRA1A,AEN,AHDC1,AHR,AKAP7,ALG6,AMMECR1L,AMOTL2,ANAPC13,ANGPT2,ANGPTL4,ANKRD11,AP3D1,AP3M1,AP5B1,ARFGAP1,ARFGAP2,ARL4D,ARL5B,ASB3/GPR75-ASB3,ATF2,ATF3,ATP1A1,ATP7B,AXIN1,AXIN2,B4GALT4,BAIAP2,BANP,BCAP29,BCAR3,BCL2L1,BCLAF3,BET1,BNIP3L,BOP1,Brd4,BTG1,BTG2,BTG3,BYSL,C17orf80,C1GALT1C1,C6orf62,C9orf40,C9orf72,CAMTA2,CAPN15,CA…	454
	Cellular Growth and Proliferation,Tissue Development	Proliferation of central nervous system cells	5.61e-08		0.585	AHR,AXIN1,BTG2,CCL5,CDKN1A,CDKN1B,CDON,CNR1,DLGAP4,FOXO3,GAK,GATA2,GDNF,GNG5,HES1,KLF4,LIMS2,LNX2,RAPGEF1,SOX11,TNF	21
	Cancer,Organismal Injury and Abnormalities,Reproductive System Disease	Tumorigenesis of reproductive tract	8.4e-06		0.577	ABCF1,ABTB2,ACIN1,ACTN1,ACTN4,ADAMTS1,ADAMTSL2,ADARB1,ADRA1A,AHDC1,AHR,AKAP7,ANGPT2,ANGPTL4,ANKRD11,AP5B1,ARFGAP1,ARL4D,ASB3/GPR75-ASB3,ATP1A1,ATP7B,AXIN1,AXIN2,B4GALT4,BAIAP2,BANP,BCAP29,BCL2L1,BCLAF3,BNIP3L,CAPN15,CASKIN2,CASP3,CASS4,CBX4,CCN1,CCNT1,CD36,CD47,CDC42EP3,CDKN1A,CDKN1B,CDON,CHST8,CLK1,CNR1,CORO1C,CPSF1,CREBBP,CREBRF,CTDP1,CWF19L2,CXCL2,CXXC1,DACT1,DBNL,DCTN1,DGKQ,DIXDC1,DLGAP4,DLST…	225
	Cancer,Organismal Injury and Abnormalities,Reproductive System Disease	Female genital neoplasm	9.33e-06		0.577	ABCF1,ABTB2,ACIN1,ACTN1,ACTN4,ADAMTS1,ADAMTSL2,ADARB1,ADRA1A,AHDC1,AHR,AKAP7,ANGPT2,ANGPTL4,ANKRD11,AP5B1,ARFGAP1,ARL4D,ASB3/GPR75-ASB3,ATP1A1,ATP7B,AXIN1,AXIN2,B4GALT4,BAIAP2,BANP,BCAP29,BCL2L1,BCLAF3,BNIP3L,CAPN15,CASKIN2,CASP3,CASS4,CBX4,CCN1,CCNT1,CD36,CD47,CDC42EP3,CDKN1A,CDKN1B,CDON,CHST8,CLK1,CNR1,CORO1C,CPSF1,CREBBP,CREBRF,CTDP1,CWF19L2,CXCL2,CXXC1,DACT1,DBNL,DCTN1,DGKQ,DIXDC1,DLGAP4,DLST…	225
	Cancer,Organismal Injury and Abnormalities	Malignant solid organ tumor	3.1e-09		0.573	ABCF1,ABTB2,ACIN1,ACKR2,ACTN1,ACTN4,ADAMTS1,ADAMTS15,ADAMTSL2,ADAP2,ADARB1,ADRA1A,AEN,AHDC1,AHR,AMMECR1L,AMOTL2,ANGPTL4,ANKRD11,AP3D1,ARFGAP2,ARL4D,ASB3/GPR75-ASB3,ATF2,ATF3,ATP1A1,ATP7B,AXIN1,AXIN2,BAIAP2,BCAR3,BCLAF3,BYSL,C17orf80,C6orf62,CAMTA2,CAPN15,CARM1,CASKIN2,CASP3,CASS4,CCNG2,CCNT1,CD36,CD47,CDC42EP3,CDKN1A,CHERP,CHST8,CISH,CLK2,CNKSR3,CNR1,CORO1C,CPSF1,CREB3L4,CREBBP,CREBRF,CRTC2,CSK,C…	318
	Lipid Metabolism,Small Molecule Biochemistry	Synthesis of lipid	2.58e-06		0.573	AHR,ALG6,ANGPT2,ANGPTL4,ATF2,ATF3,ATP1A1,B4GALT4,BCL2L1,CCL3L3,CCL5,CCN1,CD36,CEPT1,CNR1,DGKQ,DOLK,FGF7,FOXO3,G0S2,GGPS1,GPAT4,INSIG1,INSR,KLF4,KLHL25,LIMK1,LPIN2,MAP3K1,MYC,NR3C1,NR4A1,NR4A2,PITPNM1,PLSCR1,POLG,PRKAA2,PRKD2,PTGER2,PTGS2,RGS2,S1PR1,SAMD8,SGMS1,Sik1,SIRT1,SPTSSA,ST3GAL4,SYK,TNF,USP10	51
	Cancer,Cell Death and Survival,Organismal Injury and Abnormalities,Tumor Morphology	Apoptosis of cancer cells	5.63e-06		0.57	ATF2,ATF3,BCL2L1,CASP3,CDKN1A,CDKN1B,HES1,KLF10,MAP3K1,MYC,NR4A1,NR4A2,PHLDA1,RARA,RND3,SIRT1,SOX11,SYK,TNF	19
	Cancer,Organismal Injury and Abnormalities	Cancer of secretory structure	7.42e-18		0.563	ABCF1,ABTB2,ACIN1,ACTN1,ACTN4,ADAMTS1,ADAMTS15,ADAMTSL2,ADAP2,ADARB1,ADRA1A,AEN,AHDC1,AHR,AKAP7,ALG6,AMMECR1L,AMOTL2,ANGPT2,ANGPTL4,ANKRD11,AP3D1,AP3M1,AP5B1,ARFGAP1,ARFGAP2,ASB3/GPR75-ASB3,ATF2,ATF3,ATP1A1,ATP7B,AXIN1,AXIN2,B4GALT4,BAIAP2,BANP,BCAP29,BCAR3,BCL2L1,BCLAF3,BNIP3L,BTG1,BTG2,BTG3,BYSL,C17orf80,C1GALT1C1,C9orf40,C9orf72,CAMTA2,CAPN15,CARM1,CASKIN2,CASP3,CASS4,CBX4,CCL3L3,CCL5,CCN1,CCN…	389
	Cancer,Organismal Injury and Abnormalities	Breast or colorectal cancer	2.44e-14		0.555	ABCF1,ACIN1,ACKR2,ACTN1,ACTN4,ADAMTS1,ADAMTS15,ADAP2,ADARB1,ADRA1A,AHDC1,AHR,AKAP7,AMOTL2,ANAPC13,ANGPT2,ANGPTL4,ANKRD11,AP3D1,ARFGAP2,ATF2,ATF3,ATP1A1,ATP7B,AXIN1,AXIN2,BAIAP2,BANP,BCAP29,BCAR3,BCL2L1,BTG2,BTG3,BYSL,C17orf80,C1GALT1C1,CAMTA2,CAPN15,CARM1,CASKIN2,CASP3,CBX4,CCL5,CCN1,CCNG2,CCNL1,CCNT1,CD36,CDC42EP3,CDKN1A,CDKN1B,CDON,CEPT1,CHERP,CHST8,CLK1,CLK2,CNKSR3,CNR1,COQ10B,CORO1C,CPSF1,CRE…	298
	Cellular Development,Cellular Growth and Proliferation,Connective Tissue Development and Function,Hair and Skin Development and Function,Organ Development,Tissue Development	Proliferation of keratinocytes	1.75e-09		0.553	ATF2,CCNG2,CDKN1A,CNR1,FGF7,GATA3,HOXA5,INSR,KLF10,KLF4,KLF9,MYC,NFKBIZ,NR3C1,PRKD2,PTCH1,PTGER2,PTGS2,REL,RNF144B,TNF,ZFP36L1	22
	Cell Death and Survival,Organismal Injury and Abnormalities	Apoptosis of blood cells	3.58e-09		0.546	AHR,ATF2,ATF3,BCL2L1,BNIP3L,BTG1,CASP3,CCL3L3,CCL5,CD47,CDKN1A,CDKN1B,CNR1,CREBBP,CXCL2,DNAJA3,DUSP5,EFNB1,EGR3,FOXO3,Foxp1,HCAR2,IER3,INSR,KLF13,KLF2,KLF4,MYC,NQO2,NR3C1,NR4A1,POLR3E,PRF1,PTGER4,REL,S1PR1,STK17B,SYK,SYVN1,TLN1,TNF,TNFRSF21	42
	Cellular Development,Cellular Growth and Proliferation,Connective Tissue Development and Function	Proliferation of fibroblast cell lines	1.69e-09		0.54	ADRA1A,AHR,ANGPT2,AXIN1,BCL2L1,BOP1,Brd4,BTG1,BTG2,BTG3,CBX4,CDKN1A,CDKN1B,E4F1,EHF,FOXO3,GAK,GDNF,HSPA1A/HSPA1B,IER3,INSR,KLF2,KLF4,KLF6,KSR1,MAP3K1,MYC,NR3C1,PELP1,PFKFB3,PLSCR1,S1PR1,SIRT1,SYK,TGIF1,TNF,TOB1	37
	Cell Death and Survival,Organismal Injury and Abnormalities	Cell death of fibroblasts	1.85e-07		0.533	AHR,ATF2,ATF3,BCL2L1,CASP3,CDKN1A,CDKN1B,CNR1,FOXO3,HAS1,INSR,KLF2,KSR1,MAP3K1,MBD4,MYC,NR4A1,OGN,PRF1,REL,S1PR1,SIRT1,STK4,SYVN1,TNF	25
	Cell Death and Survival	Activation-induced cell death	3.72e-06		0.527	ATF2,BCL2L1,CASP3,CDKN1A,DNAJA3,KLF4,NR4A1,PRF1,RIPK2,SYVN1,TNF	11
	Dermatological Diseases and Conditions,Organismal Injury and Abnormalities	Skin lesion	6.53e-09		0.522	ABCF1,ABTB2,ACIN1,ACKR2,ACTN1,ACTN4,ADAMTS1,ADAMTS15,ADAMTSL2,ADAP2,ADARB1,ADRA1A,AEN,AHDC1,AHR,AMMECR1L,AMOTL2,ANGPTL4,ANKRD11,AP3D1,ARFGAP2,ARL4D,ASB3/GPR75-ASB3,ATF2,ATF3,ATP1A1,ATP7B,AXIN1,AXIN2,BAIAP2,BCAR3,BCL2L1,BCLAF3,BYSL,C17orf80,C6orf62,CAMTA2,CAPN15,CARM1,CASKIN2,CASP3,CASS4,CCNG2,CCNT1,CD36,CD47,CDC42EP3,CDKN1A,CHERP,CHST8,CISH,CLK2,CNKSR3,CNR1,CORO1C,CPSF1,CREB3L4,CREBBP,CREBRF,CRTC…	316
	Cardiovascular System Development and Function,Cellular Movement	Migration of vascular endothelial cells	2.18e-08		0.518	ADAMTS1,ANGPT2,ATF2,CCN1,CD36,CDKN1B,EGR3,FOXO3,GATA3,GATA6,GLUL,HHEX,HLX,KLF2,MEOX2,NR4A1,NR4A2,PRKD2,PTGS2,S1PR1,SPRY4,TNF	22
	Cellular Development,Cellular Growth and Proliferation	Colony formation of tumor cell lines	4e-08		0.518	AHR,ATF2,ATF3,BCL2L1,CCN1,CCNG2,CDKN1A,CDKN1B,DNAJA3,DUSP5,DYNC1H1,EHF,FOXO3,GDNF,HCAR2,HES1,HSPA1A/HSPA1B,INSR,KLF2,KLF4,KLF6,MAP3K1,MYC,NR4A1,PELP1,PTGS2,RNF144B,RRAD,SP1,SPRY1,SPRY4,STK4,SYK,TPD52,UNC5C	35
	Hematological System Development and Function,Immune Cell Trafficking,Inflammatory Response,Tissue Development	Accumulation of T lymphocytes	5.16e-06		0.513	ACKR2,AHR,CCL5,FOXO3,IER3,KLF2,NR3C1,RGS16,S1PR1,STK4,TNF,TNFRSF21,Tnfsf9	13
	Cancer,Neurological Disease,Organismal Injury and Abnormalities	Central nervous system solid tumor	2.07e-17		0.488	ABCF1,ACIN1,ACKR2,ACTN1,ACTN4,ADAMTS1,ADAMTS15,ADAMTSL2,ADARB1,ADRA1A,AHDC1,AHR,ALG6,AMMECR1L,AMOTL2,ANGPT2,ANKRD11,AP3D1,AP5B1,ARFGAP1,ARFGAP2,ARL5B,ASB3/GPR75-ASB3,ATF2,ATF3,ATP1A1,ATP7B,AXIN1,AXIN2,B4GALT4,BAIAP2,BANP,BCL2L1,BCLAF3,BET1,BNIP3L,BTG2,BTG3,C17orf80,C1GALT1C1,CAMTA2,CAPN15,CARM1,CASKIN2,CASP3,CASS4,CBX4,CCNG2,CCNL1,CCNT1,CD36,CD47,CDC42EP3,CDC42EP4,CDKN1A,CDKN1B,CDON,CEPT1,CHERP,C…	306
	Cell Death and Survival	Apoptosis of progenitor cells	1.8e-06		0.481	ATF3,BCL2L1,BNIP3L,CASP3,CCL5,CDKN1A,CREBBP,EFNB1,EGR3,GDNF,HES1,KLF13,KLF2,MYC,NQO2,NR3C1,NR4A1,POLR3E,PRF1,SOX11,TNF	21
	Cellular Movement	Chemotaxis	6.75e-06		0.479	ACKR2,ACTN1,ANGPT2,CCL3L3,CCL5,CCN1,CD36,CD47,CDKN1A,CNR1,CRTC2,CSK,CXCL2,CXCL6,DEK,EFNB1,EGR3,FGF7,GDNF,HCAR2,LIMK1,LPAR3,MAP3K1,NR3C1,NR4A1,NRP2,OSR1,PIK3R5,PRKD2,PTGS2,REL,RIN3,S1PR1,SCRIB,STK4,SYK,TNF	37
	Cell Death and Survival	Cell death of thymus gland	1.66e-06		0.469	AHR,ATF3,BCL2L1,CASP3,CDKN1A,DNAJA3,EFNB1,EGR3,KLF13,MYC,NQO2,NR3C1,NR4A1,POLR3E,REL,TNF	16
	Cell Signaling	Protein kinase cascade	1.35e-07		0.46	ADRA1A,ATF2,AXIN1,BCAR3,CCL5,CD36,CDON,DACT1,DIXDC1,DUSP16,DUSP5,GPS2,HES1,INSR,KSR1,LPAR3,MAP3K1,MYC,PLK2,PTGER4,RAPGEF1,RASSF2,REL,RIPK2,RNF31,SH2D3C,SIRT1,SORBS3,SYK,TIFA,TNF,TNFRSF19,USP10,ZC3H12A,ZFAND6,ZFP36L1	36
	Cell Death and Survival,Organismal Injury and Abnormalities	Apoptosis of hematopoietic cells	3.52e-06		0.459	ATF2,ATF3,BCL2L1,BNIP3L,CASP3,CCL3L3,CCL5,CDKN1A,CREBBP,EFNB1,EGR3,KLF13,KLF2,MYC,NQO2,NR3C1,NR4A1,POLR3E,PRF1,TNF	20
	Cancer,Neurological Disease,Organismal Injury and Abnormalities	Nervous system neoplasm	1.33e-17		0.456	ABCF1,ACIN1,ACKR2,ACTN1,ACTN4,ADAMTS1,ADAMTS15,ADAMTSL2,ADARB1,ADRA1A,AHDC1,AHR,ALG6,AMMECR1L,AMOTL2,ANGPT2,ANKRD11,AP3D1,AP5B1,ARFGAP1,ARFGAP2,ARL5B,ASB3/GPR75-ASB3,ATF2,ATF3,ATP1A1,ATP7B,AXIN1,AXIN2,B4GALT4,BAIAP2,BANP,BCL2L1,BCLAF3,BET1,BNIP3L,BTG2,BTG3,C17orf80,C1GALT1C1,CAMTA2,CAPN15,CARM1,CASKIN2,CASP3,CASS4,CBX4,CCNG2,CCNL1,CCNT1,CD36,CD47,CDC42EP3,CDC42EP4,CDKN1A,CDKN1B,CDON,CEPT1,CHERP,C…	309
	Cell Death and Survival	Apoptosis of thymus gland	7.35e-06		0.453	AHR,ATF3,BCL2L1,CASP3,CDKN1A,EFNB1,EGR3,KLF13,MYC,NQO2,NR3C1,NR4A1,POLR3E,TNF	14
	Cell Death and Survival	Cell death of progenitor cells	8.08e-08		0.44	ATF3,BCL2L1,BNIP3L,CASP3,CCL5,CDKN1A,CREBBP,DNAJA3,EFNB1,EGR3,GATA2,GDNF,HES1,KLF13,KLF2,KLF4,MYC,NQO2,NR3C1,NR4A1,POLR3E,PRF1,REL,SOX11,TNF	25
	Cardiovascular System Development and Function,Cellular Movement	Cell movement of endothelial cells	2.76e-09		0.437	ADAMTS1,ANGPT2,ANGPTL4,ATF2,BTG2,CCL5,CCN1,CD36,CDKN1B,EFNB1,EGR3,FOXO3,GATA2,GATA3,GATA6,GLUL,HEY1,HHEX,HLX,INSR,KLF2,MEOX2,MYC,NR4A1,NR4A2,NRP2,OSR1,PRKD2,PTGS2,RAPGEF3,RGCC,S1PR1,SIRT1,SP1,SPRY4,TNF,ZC3H12A	37
	Cancer,Cellular Development,Cellular Growth and Proliferation,Organismal Injury and Abnormalities,Tumor Morphology	Proliferation of tumor cells	1.28e-06		0.437	ACTN4,ANGPT2,ATF2,ATF3,BCL2L1,BNIP3L,BTG2,CASP3,CCN1,CD47,CDKN1A,CDKN1B,FOXO3,GDNF,HES1,HSPA1A/HSPA1B,IER3,INSR,KSR1,MYC,NR4A1,NR4A2,PFKFB3,PTCH1,PTGS2,RAD17,RASSF2,RND3,SIRT1,SOX11,SP1,TNF,TPD52,UBA1,USP10	35
	Cancer	Cell transformation	1.14e-11		0.433	ABCF1,ABTB2,ACIN1,ACKR2,ACTN4,ADAMTS1,ADAMTS15,ADAMTSL2,ADARB1,ADRA1A,AEN,AHR,AKAP7,AMMECR1L,ANGPT2,ANGPTL4,ANKRD11,AP3D1,AP5B1,ASB3/GPR75-ASB3,ATF2,ATF3,ATP1A1,AXIN1,AXIN2,BANP,BCAR3,BCL2L1,BNIP3L,BOP1,Brd4,BTG1,BTG2,C17orf80,C1GALT1C1,CAMTA2,CASP3,CBX4,CCL5,CCN1,CCNG2,CCNL1,CCNT1,CD36,CD47,CDC42EP3,CDKN1A,CDKN1B,CDON,CHERP,CHIC1,CHST8,CLK1,CNR1,CPSF1,CREB3L4,CREBBP,CSK,CWF19L2,CXCL2,CXCL6,CXXC1…	273
	Cell Death and Survival,Organismal Injury and Abnormalities	Cell death of hematopoietic cells	1.03e-07		0.416	ATF2,ATF3,BCL2L1,BNIP3L,CASP3,CCL3L3,CCL5,CDKN1A,CREBBP,DNAJA3,EFNB1,EGR3,GATA2,KLF13,KLF2,KLF4,MYC,NQO2,NR3C1,NR4A1,POLR3E,PRF1,REL,TNF	24
	Cellular Movement,Hematological System Development and Function,Immune Cell Trafficking	Cell movement of leukocytes	5.66e-09		0.411	ACKR2,ACTN4,AHR,ANGPT2,Brd4,CCL3L3,CCL5,CCN1,CCNT1,CD36,CD47,CDKN1A,CNR1,CRTC2,CSK,CXCL2,CXCL6,DBNL,DEK,DPYSL2,EFNB1,Foxp1,GATA2,GATA3,HCAR2,INSR,KLF15,KLF2,KLF6,LIMK1,MYC,MYH9,NFKBIZ,NQO2,NR3C1,NR4A1,NRP2,P2RY10,PIK3R5,PRF1,PTGER4,PTGS2,PTPRB,RAPGEF1,REL,RGCC,RGS16,RIN3,RIPK2,S1PR1,SCRIB,SERP1,SH2D3C,SIRT1,ST3GAL4,STK4,SYK,TLN1,TNF,TNFRSF21,Tnfsf9,ZC3H12A	62
	Cancer,Organismal Injury and Abnormalities	Anogenital cancer	4.39e-09		0.394	ABCF1,ABTB2,ACIN1,ACTN1,ACTN4,ADAMTS1,ADAMTS15,ADAMTSL2,ADAP2,ADRA1A,AHDC1,AHR,AKAP7,AMOTL2,ANAPC13,ANGPT2,ANGPTL4,ANKRD11,AP3D1,AP5B1,ARFGAP1,ARFGAP2,ARL5B,ASB3/GPR75-ASB3,ATF2,ATF3,ATP1A1,ATP7B,AXIN1,AXIN2,B4GALT4,BAIAP2,BANP,BCAP29,BCAR3,BCL2L1,BCLAF3,BNIP3L,BTG2,BTG3,C17orf80,C1GALT1C1,CAMTA2,CAPN15,CARM1,CASKIN2,CASP3,CASS4,CBX4,CCL5,CCN1,CCNG2,CCNL1,CCNT1,CD36,CD47,CDC42EP3,CDC42EP4,CDKN1A,…	312
	Cancer,Organismal Injury and Abnormalities,Reproductive System Disease	Malignant neoplasm of male genital organ	1.17e-08		0.394	ACIN1,ADAMTS15,ADAP2,ADRA1A,ANKRD11,AP3D1,ARFGAP2,ARL5B,ATF3,ATP1A1,AXIN1,AXIN2,B4GALT4,BANP,BCAR3,BCL2L1,BCLAF3,BNIP3L,BTG3,C17orf80,CAMTA2,CARM1,CASP3,CBX4,CCL5,CDC42EP4,CDKN1A,CDKN1B,CDON,CHERP,CHIC1,CHST8,CLK1,CNR1,CPSF1,CREBBP,CTDP1,CWF19L2,CXCL6,CXXC1,CYTH1,DACT1,DCTN1,DDX27,DGKQ,DIP2C,DLGAP4,DNAJA3,DNASE1L2,DOLK,DPY19L4,DUSP16,DUSP5,DYNC1H1,EGR3,EHF,EP400,ERCC5,FBXO33,FEM1A,FOXO3,GAK,GATA3…	172
	Embryonic Development,Nervous System Development and Function,Organ Development,Organismal Development,Tissue Development	Growth of brain	2.38e-08		0.389	AHR,BTG2,CDKN1A,CDKN1B,CDON,CNR1,DLGAP4,FOXO3,GAK,GATA2,GDNF,GNG5,HES1,KLF4,LIMS2,LNX2,MYC,RAPGEF1,SOX11	19
	Cancer,Hematological Disease,Immunological Disease,Organismal Injury and Abnormalities	Non-Hodgkin lymphoma	1.6e-07		0.375	ABCF1,AHR,ANGPT2,ATF3,AXIN2,BCL2L1,BNIP3L,BTG1,BTG2,CASP3,CBX4,CCL5,CCN1,CD36,CD47,CDKN1A,CDKN1B,CDON,CHST8,CLK1,CNR1,CREBBP,CSK,CXXC1,DAPK3,DNAJB14,DUSP5,FOXO3,GATA3,GGPS1,HIC1,IER3,INTS3,KLF2,KLF6,KSR1,LIMK1,LRIG3,MAP9,MBD1,MED12,MYC,MYLIP,NR3C1,NR4A2,NUP98,P2RY10,PHC2,PIK3R5,PPP2R3C,PRF1,PTGS2,PTPRB,RAPGEF1,RARA,REL,RGCC,RGS16,RIN3,RLIM,RND3,RNF31,S1PR1,SEC14L1,SEPTIN10,SERP1,SIRT1,SNRK,SNX18,…	81
	Cancer,Hematological Disease,Immunological Disease,Organismal Injury and Abnormalities	T-cell malignant neoplasm	2.76e-06		0.361	ADAMTS15,AEN,ANGPT2,ANKRD11,AXIN2,BCAR3,BCL2L1,BNIP3L,BTG1,C17orf80,C9orf72,CAMTA2,CBX4,CCN1,CD47,CDKN1A,CDKN1B,CLK1,CPSF1,CREBBP,CXCL2,CXCL6,DAPK3,DIP2C,DUSP5,EP400,FEM1A,FGF7,FOXO3,GATA2,GATA3,GTF3C3,HIC1,HOXA5,IER3,INSIG1,KCNE4,KLF6,KLF9,LAPTM4A,MAP3K6,MARF1,MBD1,MED12,MYC,MYH14,MYLIP,NR3C1,NR4A2,NUP98,P2RY10,PIK3R5,PPP2R3C,PRF1,PRX,PTCH2,PTPN21,PTPRB,RARA,REL,RGCC,RGS16,RLIM,RND3,RUNX1T1,S1PR…	80
	Cellular Movement	Homing of cells	1.59e-06		0.343	ACKR2,ACTN1,ANGPT2,CCL3L3,CCL5,CCN1,CD36,CD47,CDKN1A,CNR1,CRTC2,CSK,CXCL2,CXCL6,DEK,EFNB1,EGR3,FGF7,GATA3,GDNF,HCAR2,LIMK1,LPAR3,MAP3K1,MYC,NQO2,NR3C1,NR4A1,NRP2,OSR1,PIK3R5,PRKD2,PTGS2,REL,RIN3,S1PR1,SCRIB,STK4,SYK,TNF	40
	Cancer,Cell Death and Survival,Organismal Injury and Abnormalities,Tumor Morphology	Apoptosis of tumor cells	3.85e-06		0.333	ATF2,ATF3,BCL2L1,CASP3,CDKN1A,CDKN1B,HES1,INSR,KLF10,KSR1,MAP3K1,MYC,NR4A1,NR4A2,PHLDA1,PTGER2,RARA,RND3,SIRT1,SOX11,SYK,TNF,TNFRSF21	23
	Inflammatory Response	Inflammatory response	4.79e-06		0.317	ABCF1,ACKR2,Agtr1b,AHR,ANGPT2,ANGPTL4,ATF3,Brd4,CASP3,CCL3L3,CCL5,CD36,CD47,CDKN1A,CRTC2,CXCL2,CXCL6,DEK,EFNB1,FEM1A,FOXO3,GATA3,GDNF,GPS2,HCAR2,IER3,KLF4,LIMK1,NFKBIZ,NR3C1,NR4A1,NR4A2,NRP2,PFKFB3,PIK3R5,PRF1,PTGER2,PTGER4,PTGS2,PXK,RAPGEF3,REL,RIN3,RIPK2,S1PR1,SEMA7A,SGMS1,SIRT1,STK4,SYK,TMED2,TNF	52
	Cellular Development,Cellular Growth and Proliferation,Hematological System Development and Function,Hematopoiesis,Lymphoid Tissue Structure and Development,Tissue Development	Leukopoiesis	8.81e-10		0.311	AHR,AP3D1,ATF2,BCL2L1,CARM1,CCL5,CCN1,CD36,CD47,CDKN1A,CDKN1B,CISH,CREBBP,CRTC2,CSK,DEK,DNAJA3,DUSP5,EFNB1,EGR3,FOXO3,Foxp1,GATA2,GATA3,GPS2,HES1,HEY1,HHEX,HLX,KLF10,KLF2,KLF4,KLHL25,LFNG,MYC,NFKBIZ,NMT2,NQO2,NR3C1,NR4A1,NR4A2,NRARP,PLSCR1,PPP2R3C,PRF1,PTGER4,PTGS2,RARA,RC3H1,REL,RGCC,RIPK2,RUNX1T1,S1PR1,SIRT1,SOX11,SYK,TLN1,TNF,Tnfsf9,ZC3H12A,ZFP36L1,Zfp429 (includes others)	63
	Cell Cycle	Interphase	3.9e-09		0.31	ACIN1,ADRA1A,AHR,ATF2,ATF3,BCL2L1,BOP1,Brd4,BTG1,BTG2,BTG3,CARM1,CCN1,CCNG2,CDKN1A,CDKN1B,CREBBP,E4F1,EP400,FOXO3,GATA3,GATA5,GATA6,GPS2,HAS1,HES1,HIRA,IER3,INSR,KLF10,KLF4,KLF6,LIMK1,MBD4,MEOX2,MYC,NR3C1,NUCKS1,PFKFB3,PLK2,PLSCR1,PRKAA2,PTCH1,PTGS2,RAD17,REL,RGCC,RNF31,SIRT1,SLX4,SP1,TET1,TNF,TOB1,WDR4	55
	Cell Death and Survival,Organismal Injury and Abnormalities	Apoptosis of T lymphocytes	3.19e-08		0.309	AHR,ATF3,BCL2L1,CASP3,CCL5,CD47,CDKN1A,CDKN1B,DNAJA3,DUSP5,EFNB1,EGR3,FOXO3,Foxp1,IER3,INSR,KLF13,KLF2,MYC,NQO2,NR3C1,NR4A1,POLR3E,PRF1,STK17B,TLN1,TNF	27
	Cell Death and Survival,Organismal Injury and Abnormalities	Cell death of T lymphocytes	4.53e-08		0.304	AHR,ATF3,BCL2L1,CASP3,CCL5,CD47,CDKN1A,CDKN1B,DNAJA3,DUSP5,EFNB1,EGR3,FOXO3,Foxp1,IER3,INSR,KLF13,KLF2,MYC,NQO2,NR3C1,NR4A1,POLR3E,PRF1,PRKD2,REL,STK17B,TLN1,TNF	29
	Cellular Development	Differentiation of tumor cell lines	5e-09		0.302	ADRA1A,AHR,ATF2,AXIN1,BCL2L1,BTG2,CCN1,CDKN1A,CDKN1B,DRAM2,FOXO3,GATA2,GATA3,HES1,HOXA5,JDP2,KAT2B,KLF4,KLF6,LIMK1,MBD1,MYC,PELP1,PLSCR1,PTGER2,PTGER4,PTGS2,RAPGEF3,RARA,RND3,RUNX1T1,SOX11,SPRY4,TNF	34
	Gene Expression	Repression of RNA	3.28e-08		0.301	AHR,ATF2,ATF3,CBX4,E4F1,HES1,KLF10,KLF13,KLF9,MBD1,MYC,NR3C1,NR4A2,RARA,RUNX1T1,SAFB,SIRT1,SP1,TGIF1	19
	Lymphoid Tissue Structure and Development,Organ Morphology,Tissue Morphology	Quantity of lymphoid organ	2.63e-07		0.3	AHR,BCL2L1,BNIP3L,CARM1,CASP3,CDKN1A,CDKN1B,CREBBP,DNAJA3,DUSP5,EFNB1,EGR3,FGF7,GATA2,KLF13,KLF4,MYC,NMT2,NR3C1,NR4A1,POLR3E,PRF1,STK17B,STK4,TNF,UPF1	26
	Gene Expression	Transactivation of RNA	1.65e-08		0.296	ACTN4,AHR,ATF2,AXIN1,AXIN2,CARM1,CCNT1,CREBBP,EGR3,EHF,FOSL2,FOXO3,GATA3,GATA5,GATA6,GTF2A1,HERPUD1,HES1,HSF2,JDP2,KAT2B,KLF13,KLF2,KLF4,KLF6,MYC,NR3C1,NR4A1,NR4A2,PELP1,PTGS2,RARA,REL,RIPK2,SIRT1,SP1,SYK,TGIF1,TNF,YOD1	40
	Cell Death and Survival,Organismal Injury and Abnormalities	Apoptosis of leukocytes	1.69e-08		0.293	AHR,ATF3,BCL2L1,BTG1,CASP3,CCL5,CD47,CDKN1A,CDKN1B,CNR1,CXCL2,DNAJA3,DUSP5,EFNB1,EGR3,FOXO3,Foxp1,HCAR2,IER3,INSR,KLF13,KLF2,KLF4,MYC,NQO2,NR3C1,NR4A1,POLR3E,PRF1,PTGER4,REL,S1PR1,STK17B,SYK,SYVN1,TLN1,TNF,TNFRSF21	38
	Cell Morphology,Cellular Assembly and Organization,Cellular Function and Maintenance	Formation of cellular protrusions	1.7e-07		0.289	ACTN4,ADAMTS1,AHR,ANGPTL4,ATF3,AXIN1,BAIAP2,BTG2,BTG3,CARM1,CASP3,CCL5,CCN1,CD47,CDC42EP4,CDKN1A,CDKN1B,CNR1,CORO1C,CREBBP,CSNK1D,CXCL6,DACT1,DBNL,DCTN1,DIXDC1,DPYSL2,EFNB1,EGR3,FAM107A,FGF7,GAK,GATA3,GDNF,GPM6A,HES1,INSR,KAT2B,KCNJ2,KDM5C,KLF7,KLF9,LIMK1,MAP3K1,MARK4,MYC,MYH9,MYLIP,NR3C1,NR4A1,NRP2,NUDCD3,PLK2,PRKAA2,PTCH1,PTGS2,PTPN23,RAPGEF1,RAPGEF3,RGS2,RNF31,S1PR1,SEMA7A,SIRT1,SP1,SYK,TET1,T…	71
	Tissue Morphology	Quantity of epithelial tissue	3.33e-08		0.285	AHR,ANGPT2,CDKN1A,CDKN1B,EFNB1,FGF7,GATA6,GDNF,HES1,HOXA5,HSF2,INSR,KLF2,KLF4,MYC,NR3C1,PTGER2,PTGS2,RARA,SIRT1,STK4,SYK,TNF	23
	Cancer,Organismal Injury and Abnormalities	Genitourinary carcinoma	3.26e-08		0.277	ABCF1,ABTB2,ACIN1,ACTN1,ACTN4,ADAMTS1,ADAMTS15,ADAMTSL2,ADAP2,ADRA1A,AHDC1,AHR,AKAP7,AMOTL2,ANGPT2,ANGPTL4,ANKRD11,AP3D1,AP5B1,ARFGAP1,ARFGAP2,ARL5B,ASB3/GPR75-ASB3,ATF3,ATP1A1,ATP7B,AXIN1,AXIN2,B4GALT4,BAIAP2,BANP,BCAP29,BCAR3,BCL2L1,BCLAF3,BNIP3L,BTG2,BTG3,C17orf80,C1GALT1C1,C6orf62,CAMTA2,CAPN15,CARM1,CASP3,CASS4,CBX4,CCN1,CCNG2,CCNL1,CCNT1,CD36,CD47,CDC42EP3,CDC42EP4,CDKN1A,CDKN1B,CDON,CHERP,…	311
	Cell Death and Survival,Organismal Injury and Abnormalities	Apoptosis of B-lymphocyte derived cell lines	1e-05		0.263	BCL2L1,CASP3,CDKN1A,CDKN1B,DEK,FOXO3,HES1,MYC,SIRT1,SP1,SYK,TNF	12
	Cell Death and Survival,Organismal Injury and Abnormalities	Cell death of lymphatic system cells	1.16e-07		0.254	AHR,ATF3,BCL2L1,BNIP3L,CASP3,CCL5,CD47,CDKN1A,CDKN1B,DNAJA3,DUSP5,EFNB1,EGR3,FOXO3,Foxp1,IER3,INSR,KLF13,KLF2,MYC,NQO2,NR3C1,NR4A1,POLR3E,PRF1,PRKD2,REL,RNF31,S1PR1,STK17B,SYVN1,TLN1,TNF,TNFRSF21	34
	Cancer,Organismal Injury and Abnormalities	Generation of tumor	1.79e-15		0.252	ABCF1,ABTB2,ACIN1,ACKR2,ACTN1,ACTN4,ADAMTS1,ADAMTS15,ADAMTSL2,ADAP2,ADARB1,ADRA1A,AHDC1,AHR,AKAP7,AMMECR1L,AMOTL2,ANGPT2,ANGPTL4,ANKRD11,AP3D1,AP5B1,ARFGAP1,ARFGAP2,ARL5B,ASB3/GPR75-ASB3,ATF2,ATF3,ATP1A1,ATP7B,AXIN1,AXIN2,B4GALT4,BAIAP2,BANP,BCAP29,BCAR3,BCL2L1,BCLAF3,BET1,BNIP3L,BTG2,BTG3,C17orf80,C1GALT1C1,C6orf62,CAMTA2,CAPN15,CARM1,CASKIN2,CASP3,CASS4,CBX4,CCL5,CCN1,CCNG2,CCNL1,CCNT1,CD36,CD4…	391
	Cell Death and Survival,Organismal Injury and Abnormalities	Apoptosis of lymphatic system cells	6.66e-08		0.235	AHR,ATF3,BCL2L1,BNIP3L,CASP3,CCL5,CD47,CDKN1A,CDKN1B,DNAJA3,DUSP5,EFNB1,EGR3,FOXO3,Foxp1,IER3,INSR,KLF13,KLF2,MYC,NQO2,NR3C1,NR4A1,POLR3E,PRF1,REL,S1PR1,STK17B,SYVN1,TLN1,TNF,TNFRSF21	32
	Cell Death and Survival,Organismal Injury and Abnormalities	Cell death of epithelial cells	2.56e-07		0.227	AHR,ATF2,ATF3,ATP7B,BCL2L1,BNIP3L,CASP3,CD36,CDKN1A,CDKN1B,CDON,DLST,EP400,FGF7,FOXO3,IER3,KLF10,KSR1,MAP3K1,MED12,MYC,NFKBIZ,NQO2,NR3C1,NR4A1,PRF1,PRKAA2,PTCH1,PTGS2,REL,RGS16,RND3,RNF216,RNF31,S1PR1,SELENOP,SEMA7A,STK4,SYVN1,TNF,TNFRSF19	41
	Cell Death and Survival,Organismal Injury and Abnormalities	Cell death of mononuclear leukocytes	3.4e-08		0.223	AHR,ATF3,BCL2L1,CASP3,CCL5,CD47,CDKN1A,CDKN1B,DNAJA3,DUSP5,EFNB1,EGR3,FOXO3,Foxp1,IER3,INSR,KLF13,KLF2,KLF4,MYC,NQO2,NR3C1,NR4A1,POLR3E,PRF1,PRKD2,REL,RNF31,S1PR1,STK17B,SYVN1,TLN1,TNF,TNFRSF21	34
	Cell Death and Survival,Organismal Injury and Abnormalities	Apoptosis of keratinocytes	5.54e-06		0.223	BCL2L1,CASP3,CDKN1A,KLF10,MYC,NQO2,NR3C1,PTGS2,RND3,RNF31,TNF	11
	Cell Death and Survival,Organismal Injury and Abnormalities	Apoptosis of mononuclear leukocytes	2.26e-08		0.221	AHR,ATF3,BCL2L1,CASP3,CCL5,CD47,CDKN1A,CDKN1B,DNAJA3,DUSP5,EFNB1,EGR3,FOXO3,Foxp1,IER3,INSR,KLF13,KLF2,KLF4,MYC,NQO2,NR3C1,NR4A1,POLR3E,PRF1,REL,S1PR1,STK17B,SYVN1,TLN1,TNF,TNFRSF21	32
	Protein Synthesis	Synthesis of protein	1.24e-06		0.221	ABCF1,AHR,ANGPT2,BTG2,CASP3,CDKN1B,DAPK3,EIF4A2,EIF4ENIF1,EPRS1,FOXO3,GEMIN5,HSPA1A/HSPA1B,INSR,KLF15,KLF2,KLHL25,MYBBP1A,MYC,NR3C1,NSUN5,PRKAA2,RAPGEF3,RARA,RGS2,SERP1,ST3GAL4,SYK,TENT5B,TNF,TOB1,UPF1,ZC3H12A,ZCCHC4,ZFP36L1	35
	Cancer,Gastrointestinal Disease,Organismal Injury and Abnormalities	Gastrointestinal tract cancer	1.31e-13		0.218	ABCF1,ABTB2,ACIN1,ACKR2,ACTN1,ACTN4,ADAMTS1,ADAMTS15,ADAMTSL2,ADAP2,ADARB1,ADRA1A,AEN,AHDC1,AHR,AKAP7,ALG6,AMMECR1L,AMOTL2,ANGPT2,ANGPTL4,ANKRD11,AP3D1,AP3M1,AP5B1,ARFGAP1,ARFGAP2,ARL4D,ARL5B,ASB3/GPR75-ASB3,ATF2,ATF3,ATP1A1,ATP7B,AXIN1,AXIN2,BAIAP2,BANP,BCAP29,BCAR3,BCL2L1,BCLAF3,BNIP3L,BTG1,BTG3,BYSL,C17orf80,C9orf72,CAMTA2,CAPN15,CARM1,CASKIN2,CASP3,CASS4,CBX4,CCL5,CCN1,CCNG2,CCNL1,CCNT1,CD36,…	376
	Cellular Development,Cellular Growth and Proliferation,Hematological System Development and Function,Hematopoiesis	Proliferation of hematopoietic cells	1.55e-06		0.217	AXIN1,BCL2L1,BTG1,CCL3L3,CDKN1A,CDKN1B,CXCL2,DNAJA3,EFNB1,EGR3,FOXO3,GATA2,GATA3,HOXA5,KLF2,KLF4,MYC,MYH9,PTGS2,RARA,REL,S1PR1,SYK,TNF	24
	Gene Expression	Transactivation	1.05e-08		0.211	ACTN4,AHR,ATF2,AXIN1,AXIN2,CARM1,CCNT1,CREBBP,CRTC2,EGR3,EHF,FOSL2,FOXO3,GATA3,GATA5,GATA6,GTF2A1,HERPUD1,HES1,HSF2,JDP2,KAT2B,KLF13,KLF2,KLF4,KLF6,MEOX2,MYC,NR3C1,NR4A1,NR4A2,PELP1,PTGS2,RARA,REL,RIPK2,SIRT1,SP1,SYK,TGIF1,TNF,YOD1	42
	Cancer,Organismal Injury and Abnormalities	Malignant genitourinary solid tumor	1.73e-08		0.202	ABCF1,ABTB2,ACIN1,ACTN1,ACTN4,ADAMTS1,ADAMTS15,ADAMTSL2,ADAP2,ADRA1A,AHDC1,AHR,AKAP7,AMOTL2,ANAPC13,ANGPT2,ANGPTL4,ANKRD11,AP3D1,AP5B1,ARFGAP1,ARFGAP2,ARL5B,ASB3/GPR75-ASB3,ATF2,ATF3,ATP1A1,ATP7B,AXIN1,AXIN2,B4GALT4,BAIAP2,BANP,BCAP29,BCAR3,BCL2L1,BCLAF3,BNIP3L,BTG2,BTG3,C17orf80,C1GALT1C1,C6orf62,CAMTA2,CAPN15,CARM1,CASKIN2,CASP3,CASS4,CBX4,CCL5,CCN1,CCNG2,CCNL1,CCNT1,CD36,CD47,CDC42EP3,CDC42EP4…	330
	Tissue Development	Growth of epithelial tissue	2.2e-14		0.188	ADAMTS1,AHR,ANGPT2,ANGPTL4,ATF2,ATF3,BCL2L1,C1GALT1C1,CASP3,CCL5,CCN1,CCNG2,CD36,CDKN1A,CDKN1B,CNR1,CREBBP,CRTC2,EGR3,FGF7,FOXO3,Foxp1,GATA2,GATA3,GATA6,GLUL,HES1,HEY1,HHEX,HLX,HOXA5,INSR,KCNJ2,KLF10,KLF2,KLF4,KLF9,LIMS2,MYC,NFKBIZ,NR3C1,NR4A1,NR4A2,NRARP,NRP2,OSR1,PELP1,PFKFB3,PRKD2,PTCH1,PTGER2,PTGS2,RARA,REL,RGCC,RNF144B,SEMA6B,SIRT1,SOX11,SP1,SPRY4,STK4,TNF,TOB1,UBA1,YOD1,ZFP36L1	67
	Cell Death and Survival,Organismal Injury and Abnormalities	Cell death of thymocytes	6.34e-06		0.188	ATF3,BCL2L1,CASP3,CDKN1A,DNAJA3,EFNB1,EGR3,KLF13,MYC,NQO2,NR3C1,NR4A1,POLR3E,REL,TNF	15
	Cellular Development,Connective Tissue Development and Function	Adipogenesis of cells	5.17e-08		0.177	AHR,AXIN1,GATA2,GATA3,GLP1R,GPS2,KLF10,KLF2,KLF6,LPIN2,NR3C1,NR4A1,NR4A2,TNF,TNFRSF19,ZC3H12A	16
	Cell Cycle	Interphase of tumor cell lines	1.41e-06		0.173	ACIN1,ADRA1A,AHR,ATF2,BCL2L1,BTG2,BTG3,CCN1,CCNG2,CDKN1A,CDKN1B,FOXO3,GATA3,GATA5,GATA6,GPS2,HAS1,HES1,INSR,KLF10,KLF4,LIMK1,MYC,NR3C1,NUCKS1,PFKFB3,PLSCR1,PRKAA2,RAD17,RNF31,SLX4,SP1,TNF,TOB1,WDR4	35
	Cancer,Gastrointestinal Disease,Organismal Injury and Abnormalities	Pancreaticobiliary cancer	7.15e-07		0.168	ABTB2,ACTN4,ADAMTS1,ADAMTS15,ADARB1,AHR,AKAP7,ANGPT2,ANKRD11,AP3D1,ASB3/GPR75-ASB3,ATF2,ATP7B,AXIN1,AXIN2,BAIAP2,BCAR3,BCL2L1,CAMTA2,CARM1,CASKIN2,CASP3,CASS4,CCL3L3,CCL5,CCN1,CCNL1,CDKN1A,CDON,CHERP,CHST8,CLK1,CLK2,CNKSR3,CPSF1,CREB3L4,CREBBP,CWF19L2,CXCL2,CXCL6,DCTN1,DDX54,DEK,DIP2C,DLST,DOLK,DRAM2,DTX2,DUSP16,E4F1,EP400,FBXO32,FBXO33,FEM1A,FOSL2,GAK,GATA3,GATA6,GATAD2A,GEMIN5,GINM1,GPS2,GRAMD2…	142
	Cell Cycle	S phase	3.44e-07		0.166	AHR,BCL2L1,CCNG2,CDKN1A,CDKN1B,CREBBP,E4F1,EP400,FOXO3,GATA5,GATA6,HIRA,KLF4,MYC,NUCKS1,PFKFB3,PLK2,PRKAA2,RAD17,REL,RGCC,RNF31,SLX4,TNF	24
	Lymphoid Tissue Structure and Development,Tissue Morphology	Quantity of lymphatic system cells	1.47e-10		0.161	ACKR2,AHR,ANGPT2,BCL2L1,BNIP3L,Brd4,CARM1,CASP3,CCL5,CD36,CD47,CDKN1A,CDKN1B,CISH,CREBBP,CSK,CXCL6,DNAJA3,DUSP5,EFNB1,EGR3,FGF7,FOSL2,FOXO3,Foxp1,GATA2,GATA3,HCAR2,INSR,KLF10,KLF13,KLF2,KLF4,MYC,MYH9,NMT2,NQO2,NR3C1,NR4A1,NUP98,POLR3E,PRF1,RARA,RASSF2,RC3H1,REL,RGCC,RIPK2,RNF31,S1PR1,SH2D3C,SIRT1,ST3GAL4,STK17B,STK4,SYK,SYVN1,TLN1,TNF,TNFRSF21,TOB1,UPF1,YOD1,ZC3H12A	64
	Cancer,Organismal Injury and Abnormalities	Growth of tumor	2.17e-13		0.158	ACTN4,ADAMTS1,AHR,AMOTL2,ANGPT2,ANGPTL4,ATF2,ATF3,BCL2L1,BNIP3L,BTG2,BTG3,CASP3,CCL5,CCN1,CD36,CD47,CDC42EP3,CDKN1A,CDKN1B,CDON,CNR1,CREBBP,DAPK3,DPYSL2,EGR3,EHF,FOXO3,GATA3,GATA5,GATA6,GATAD2A,GDNF,HAS1,HCAR2,HES1,HHEX,HIC1,HOXA5,HSPA1A/HSPA1B,IER3,INSR,KAT2B,KIRREL1,KLF10,KLF4,KLF6,KLF7,KLF9,KSR1,MAP3K6,MOB4,MYC,NR3C1,NR4A1,NR4A2,NRP2,PFKFB3,PFKFB4,PHF12,PHLDA1,PIK3R5,PLK2,PRF1,PTCH1,PTCH2,PTGE…	93
	Cardiovascular System Development and Function,Cellular Movement	Movement of vascular endothelial cells	3.13e-08		0.157	ADAMTS1,ANGPT2,ATF2,CCN1,CD36,CDKN1B,EGR3,FOXO3,GATA3,GATA6,GLUL,HHEX,HLX,KLF2,MEOX2,NR4A1,NR4A2,OSR1,PRKD2,PTGS2,S1PR1,SPRY4,TNF	23
	Cancer,Gastrointestinal Disease,Organismal Injury and Abnormalities	Intestinal cancer	9.3e-14		0.152	ABCF1,ABTB2,ACIN1,ACKR2,ACTN1,ACTN4,ADAMTS1,ADAMTS15,ADAMTSL2,ADAP2,ADARB1,ADRA1A,AEN,AHDC1,AHR,AKAP7,ALG6,AMOTL2,ANGPT2,ANGPTL4,ANKRD11,AP3D1,AP3M1,AP5B1,ARFGAP1,ARFGAP2,ARL4D,ARL5B,ASB3/GPR75-ASB3,ATF2,ATF3,ATP1A1,ATP7B,AXIN1,AXIN2,BAIAP2,BANP,BCAP29,BCAR3,BCL2L1,BCLAF3,BNIP3L,BTG1,BTG3,BYSL,C17orf80,C9orf72,CAMTA2,CAPN15,CARM1,CASKIN2,CASP3,CASS4,CBX4,CCL5,CCN1,CCNG2,CCNL1,CCNT1,CD36,CDC42EP3,…	358
	Cancer,Gastrointestinal Disease,Organismal Injury and Abnormalities	Malignant neoplasm of large intestine	7.1e-13		0.152	ABCF1,ABTB2,ACIN1,ACKR2,ACTN1,ACTN4,ADAMTS1,ADAMTS15,ADAMTSL2,ADAP2,ADARB1,ADRA1A,AEN,AHDC1,AHR,AKAP7,ALG6,AMOTL2,ANGPT2,ANGPTL4,ANKRD11,AP3D1,AP3M1,AP5B1,ARFGAP1,ARFGAP2,ARL4D,ARL5B,ASB3/GPR75-ASB3,ATF2,ATF3,ATP1A1,ATP7B,AXIN1,AXIN2,BAIAP2,BANP,BCAP29,BCAR3,BCL2L1,BCLAF3,BNIP3L,BTG3,BYSL,C17orf80,C9orf72,CAMTA2,CAPN15,CARM1,CASKIN2,CASP3,CASS4,CBX4,CCL5,CCN1,CCNG2,CCNL1,CCNT1,CD36,CDC42EP3,CDC42…	355
	Cancer,Organismal Injury and Abnormalities	Head and neck carcinoma	1.07e-12		0.152	ABCF1,ABTB2,ACIN1,ACTN1,ACTN4,ADAMTS1,ADAMTS15,ADAMTSL2,ADAP2,ADARB1,AEN,AHDC1,AHR,AKAP7,ALG6,AMMECR1L,AMOTL2,ANGPT2,ANGPTL4,ANKRD11,AP3D1,AP3M1,AP5B1,ARFGAP1,ARFGAP2,ASB3/GPR75-ASB3,ATF2,ATP1A1,ATP7B,AXIN1,AXIN2,BAIAP2,BANP,BCAP29,BCAR3,BCL2L1,BCLAF3,BOP1,BTG1,BTG2,BTG3,BYSL,C17orf80,C1GALT1C1,C9orf40,C9orf72,CAMTA2,CAPN15,CARM1,CASKIN2,CASP3,CBX4,CCN1,CCNT1,CD36,CD47,CDC42EP3,CDC42EP4,CDKN1A,CD…	363
	Cancer,Gastrointestinal Disease,Organismal Injury and Abnormalities	Colorectal cancer	6.89e-10		0.152	ACIN1,ACKR2,ACTN1,ADAMTS1,ADAMTS15,ADAP2,ADARB1,ADRA1A,AHDC1,AHR,AKAP7,AMOTL2,ANGPT2,ANGPTL4,ANKRD11,AP3D1,ARFGAP2,ATF3,ATP7B,AXIN1,AXIN2,BANP,BCAP29,BCL2L1,BTG3,BYSL,CAMTA2,CAPN15,CARM1,CASKIN2,CASP3,CBX4,CCL5,CCNG2,CCNT1,CD36,CDC42EP3,CDKN1A,CDKN1B,CDON,CEPT1,CHERP,CHST8,CLK2,CNKSR3,CNR1,COQ10B,CORO1C,CPSF1,CREB3L4,CREBBP,CRTC2,CSNK1D,CSRNP2,CTTNBP2NL,DCTN1,DDX27,DDX54,DIP2C,DLGAP4,DLST,DNAJB4,…	241
	Cellular Movement	Cell movement of tumor cell lines	2.62e-07		0.152	ACTN1,ACTN4,AHR,ANGPT2,ANGPTL4,ATF2,ATF3,AXIN2,BANP,BCAR3,BCL2L1,BTG1,CASS4,CCL3L3,CCL5,CCN1,CD36,CD47,CDC42EP3,CDKN1A,CDKN1B,CORO1C,CSK,CXCL2,DACT1,DNAJA3,DNAJB4,DPYSL2,DUSP5,EFNB1,EHF,FGF7,FOXO3,GATA3,GATA5,GDNF,GEMIN5,GLUL,HAS1,HES1,HHEX,HIC1,HSPA1A/HSPA1B,KLF2,KLF4,KLF6,KLF9,LIMK1,LPAR3,MAP3K1,MARK4,MEOX2,MOB4,MYC,MYH9,NR4A1,NR4A2,NRP2,PFKFB4,PHLDA1,PIK3R5,PRKD2,PTGER4,PTGS2,PTPN23,RAPGEF1,RA…	81
	Cancer,Hematological Disease,Immunological Disease,Organismal Injury and Abnormalities	Neoplasia of leukocytes	4.99e-10		0.135	ABCF1,ADAMTS15,ADRA1A,AEN,AHR,ANGPT2,ANKRD11,ATF2,ATF3,AXIN1,AXIN2,BCAR3,BCL2L1,BNIP3L,BTG1,BTG2,C17orf80,C1GALT1C1,CAMTA2,CASP3,CBX4,CCL5,CCN1,CCNG2,CD36,CD47,CDC42EP3,CDKN1A,CDKN1B,CDON,CHIC1,CHST8,CLK1,CNR1,CPSF1,CREBBP,CSK,CWF19L2,CXCL2,CXCL6,CXXC1,CYB561,DAPK3,DEK,DNAJB14,DUSP16,DUSP5,EP400,FAM167A,FEM1A,FGF7,FOSL2,FOXO3,GATA2,GATA3,GATA5,GGPS1,GPR157,HAS1,HHEX,HIC1,IER3,INSR,INTS3,KCNE4,KCN…	151
	Embryonic Development,Organismal Development,Tissue Development	Development of head	6.07e-10		0.132	AHR,ANGPTL4,ANKRD11,ATF2,AXIN1,AXIN2,BCAR3,BCL2L1,BTG2,CASP3,CD36,CDKN1A,CDKN1B,CDON,CNR1,CORO1C,CREBBP,DIXDC1,DLGAP4,FGF7,FOSL2,FOXO3,GAK,GATA2,GATA3,GDNF,GNG5,GPM6A,HES1,HHEX,HIRA,IER3IP1,INSIG1,KLF2,KLF4,LIMK1,LIMS2,LNX2,LRIG3,MAP3K1,MED12,MEOX2,MYC,NFKBIZ,NR3C1,NR4A1,NR4A2,NRP2,NSUN5,OGN,OSR1,PER2,PHC2,PITPNM1,PTCH1,PTGS2,PTPN23,RAPGEF1,RAPGEF3,RARA,S1PR1,SAMD4B,SCRIB,SELENOP,SEMA6B,SEMA7A,SH…	76
	Cellular Function and Maintenance	Homeostasis of blood cells	4.07e-08		0.132	AHR,AP3D1,ATF2,CARM1,CASP3,CCL5,CCN1,CDKN1A,CDKN1B,CISH,CREBBP,CSK,CXCL6,DNAJA3,EFNB1,EGR3,FOXO3,Foxp1,GATA2,GATA3,HLX,KLF10,KLF2,KLF4,KLHL25,LFNG,Mir142hg,NFKBIZ,NMT2,NR4A1,NR4A2,NRARP,PPP2R3C,PTGER4,PTGS2,RC3H1,REL,RGCC,RIPK2,S1PR1,SIRT1,SYK,TNF,Tnfsf9,Ubap2l,ZFP36L1	46
	Cellular Function and Maintenance	Homeostasis of leukocytes	5.08e-08		0.132	AHR,AP3D1,ATF2,CARM1,CASP3,CCL5,CCN1,CDKN1A,CDKN1B,CISH,CREBBP,CSK,CXCL6,DNAJA3,EFNB1,EGR3,FOXO3,Foxp1,GATA2,GATA3,HLX,KLF10,KLF2,KLF4,KLHL25,LFNG,Mir142hg,NFKBIZ,NMT2,NR4A1,NR4A2,NRARP,PPP2R3C,PTGER4,PTGS2,RC3H1,REL,RGCC,RIPK2,S1PR1,SIRT1,SYK,TNF,Tnfsf9,ZFP36L1	45
	Cell-mediated Immune Response,Cellular Function and Maintenance,Hematological System Development and Function	T cell homeostasis	4.88e-08		0.129	AHR,AP3D1,ATF2,CARM1,CASP3,CCL5,CCN1,CDKN1A,CDKN1B,CISH,CREBBP,CSK,DNAJA3,EFNB1,EGR3,FOXO3,Foxp1,GATA2,GATA3,HLX,KLF10,KLF2,KLF4,KLHL25,LFNG,NFKBIZ,NMT2,NR4A1,NR4A2,NRARP,PPP2R3C,PTGER4,PTGS2,RC3H1,REL,RGCC,RIPK2,S1PR1,SIRT1,SYK,TNF,Tnfsf9,ZFP36L1	43
	Cardiovascular System Development and Function	Vasoconstriction	1.66e-06		0.12	ADRA1A,Agtr1b,AHR,ANGPT2,CCL5,CNR1,DUSP5,HSPA1A/HSPA1B,PER2,PTGER2,PTGER4,PTGS2,RGS2,TNF	14
	Embryonic Development,Organismal Development,Tissue Development	Development of abdomen	4.2e-08		0.097	ACTN4,ADAMTS1,Agtr1b,AHR,Aph1c,ATF2,ATF3,BCL2L1,Brd4,CDKN1A,CDKN1B,CREBBP,FGF7,FOXO3,GAK,GATA3,GATA6,GDNF,GLP1R,GPS2,HES1,HHEX,HLX,HOXA5,INSR,KLF6,LFNG,MYC,NFKBIZ,NR3C1,NR4A1,OSR1,PPP2R3C,PTCH1,PTGER2,PTGER4,PTGS2,RARA,RC3H1,RNF31,SELENOT,SIRT1,SP1,SPRY1,TIPARP,TNF	46
	Cell Death and Survival	Apoptosis	1.6e-14		0.085	ACIN1,ACTN4,ADAMTS1,ADARB1,ADRA1A,Agtr1b,AHR,ANGPT2,ANGPTL4,ATF2,ATF3,ATP1A1,AXIN1,AXIN2,BANP,BCL2L1,BNIP3L,BTG1,BTG2,C1GALT1C1,CASP3,CBX4,CCL3L3,CCL5,CCN1,CCNT1,CD36,CD47,CDC42EP3,CDKN1A,CDKN1B,CDON,CNR1,CREBBP,CRTC2,CSK,CXCL2,DAPK3,DCTN1,DEK,DNAJA3,DUSP5,DYNC1H1,E4F1,EFNB1,EGR3,EHF,EP400,ERCC5,EVA1C,FBXO32,FKBP5,FOXO3,Foxp1,G0S2,GATA2,GATA3,GATA5,GATA6,GATAD2A,GDNF,GLP1R,GNG5,GPS2,HAS1,HCAR2,HE…	164
	Connective Tissue Development and Function	Adipogenesis	8.25e-09		0.079	AHR,ATF2,AXIN1,GATA2,GATA3,GLP1R,GPS2,KLF10,KLF2,KLF6,LPIN2,NR3C1,NR4A1,NR4A2,SIRT1,SLC25A25,SYK,TNF,TNFRSF19,ZC3H12A	20
	Cell Cycle	Cell cycle progression of tumor cell lines	2.16e-06		0.076	AHR,BANP,CCNG2,CDKN1A,CDKN1B,DNAJB4,EHF,FOXO3,HES1,IER3,KLF10,KLF4,MYC,NR3C1,NR4A1,PELP1,PPP1R13B,RAD17,RARA,RNF31,RRAD,RUNX1T1,SYK,TNF,ZNF655	25
	Cell-mediated Immune Response,Cellular Development,Cellular Function and Maintenance,Cellular Growth and Proliferation,Embryonic Development,Hematological System Development and Function,Hematopoiesis,Lymphoid Tissue Structure and Development,Organ Development,Organismal Development,Tissue Development	T cell development	1.88e-07		0.074	AHR,AP3D1,ATF2,CARM1,CCL5,CCN1,CDKN1A,CDKN1B,CISH,CREBBP,CSK,DNAJA3,EFNB1,EGR3,FOXO3,Foxp1,GATA2,GATA3,HLX,KLF10,KLF2,KLF4,KLHL25,LFNG,NFKBIZ,NMT2,NR4A1,NR4A2,NRARP,PTGER4,PTGS2,RC3H1,REL,RGCC,RIPK2,S1PR1,SIRT1,SYK,TNF,Tnfsf9,ZFP36L1	41
	Organismal Injury and Abnormalities,Respiratory Disease	Lower respiratory tract disorder	2.29e-06		0.07	ADRA1A,AHR,ARFGAP2,AXIN2,BCL2L1,CASP3,CCL5,CDKN1A,CORO1C,CREBBP,CTTNBP2NL,DBNL,DEK,EIF4A2,FGF7,FOXO3,GAK,GATA3,HOXA5,HSPA1A/HSPA1B,INSIG1,INSR,LFNG,NMT2,NR3C1,PRF1,PTGER4,PTGS2,RARA,RGS2,RIN3,SIRT1,TNF	33
	Organismal Injury and Abnormalities,Organismal Survival	Organismal death	2.82e-17		0.067	ACTN4,ADAMTS1,ADARB1,ADRA1A,Agtr1b,AHR,ANGPT2,ANGPTL4,ATF2,ATF3,ATP1A1,ATP7B,AXIN1,BCL2L1,BNIP3L,Brd4,BTG3,BYSL,C1GALT1C1,CAPN15,CARM1,CASP3,CBX4,CCL3L3,CCN1,CD36,CD47,CDKN1A,CDKN1B,CDON,CLK1,CNR1,CREBBP,CSK,CSNK1D,CSRNP2,CXCL2,CXXC1,DACT1,DCTN1,DNAJA3,DNAJB4,DOLK,DYNC1H1,E4F1,EFNB1,EGR3,EP400,ERCC5,FGF7,FOSL2,FOXO3,Foxp1,FOXP4,GAK,GATA2,GATA3,GATA5,GATA6,GATAD2A,GDNF,GLP1R,GNG5,GPS2,HAS1,HES1,HE…	167
	Cell Death and Survival,Organismal Injury and Abnormalities	Cell death of lymphocytes	4.48e-08		0.06	AHR,ATF3,BCL2L1,CASP3,CCL5,CD47,CDKN1A,CDKN1B,DNAJA3,DUSP5,EFNB1,EGR3,FOXO3,Foxp1,IER3,INSR,KLF13,KLF2,MYC,NQO2,NR3C1,NR4A1,POLR3E,PRF1,PRKD2,REL,RNF31,S1PR1,STK17B,SYVN1,TLN1,TNF,TNFRSF21	33
	Cancer,Organismal Injury and Abnormalities	Malignant neoplasm of retroperitoneum	3.42e-08		0.059	ABCF1,ABTB2,ACIN1,ACTN4,ADAMTS1,ADAMTS15,ADARB1,AHR,AKAP7,ANGPT2,ANKRD11,AP3D1,ARFGAP1,ARFGAP2,ASB3/GPR75-ASB3,ATF2,ATF3,ATP7B,AXIN2,BAIAP2,BCAR3,BCL2L1,BNIP3L,BTG2,BTG3,C6orf62,CAMTA2,CAPN15,CASKIN2,CASP3,CASS4,CCL3L3,CCL5,CCN1,CCNL1,CDC42EP3,CDKN1A,CDKN1B,CDON,CHERP,CHIC1,CLK1,CNKSR3,CPSF1,CREB3L4,CREBBP,CREBRF,CRTC2,CWF19L2,CXCL2,CXCL6,DCTN1,DDX27,DIP2C,DLST,DOLK,DRAM2,DUSP16,E4F1,EGR3,EIF4A2,…	165
	Cell Death and Survival,Organismal Injury and Abnormalities	Apoptosis of lymphocytes	2.78e-08		0.052	AHR,ATF3,BCL2L1,CASP3,CCL5,CD47,CDKN1A,CDKN1B,DNAJA3,DUSP5,EFNB1,EGR3,FOXO3,Foxp1,IER3,INSR,KLF13,KLF2,MYC,NQO2,NR3C1,NR4A1,POLR3E,PRF1,REL,S1PR1,STK17B,SYVN1,TLN1,TNF,TNFRSF21	31
	Cellular Growth and Proliferation,Organ Development,Reproductive System Development and Function	Proliferation of gonadal cells	8.15e-07		0.049	AHR,CDKN1A,CDKN1B,FGF7,FOXO3,GDNF,INSR,MYC,PTGER2,PTGS2,SLX4,TNF	12
	Cancer,Organismal Injury and Abnormalities,Reproductive System Disease	Prostate cancer	5.24e-08		0.038	ACIN1,ADAMTS15,ADAP2,ADRA1A,ANKRD11,AP3D1,ARFGAP2,ATF3,ATP1A1,AXIN1,AXIN2,B4GALT4,BANP,BCAR3,BCL2L1,BCLAF3,BNIP3L,BTG3,C17orf80,CAMTA2,CARM1,CASP3,CBX4,CCL5,CDC42EP4,CDKN1A,CDKN1B,CDON,CHERP,CHIC1,CLK1,CNR1,CPSF1,CREBBP,CTDP1,CWF19L2,CXCL6,CXXC1,CYTH1,DACT1,DCTN1,DDX27,DGKQ,DIP2C,DLGAP4,DNAJA3,DNASE1L2,DOLK,DPY19L4,DUSP16,DUSP5,DYNC1H1,EGR3,EHF,EP400,ERCC5,FBXO33,FEM1A,FOXO3,GAK,GATA3,GATA5,GGPS1…	167
	Cancer,Organismal Injury and Abnormalities,Reproductive System Disease	Genital tract cancer	8.9e-08		0.038	ABCF1,ABTB2,ACIN1,ACTN1,ACTN4,ADAMTS1,ADAMTS15,ADAMTSL2,ADAP2,ADRA1A,AHDC1,AHR,AKAP7,ANGPT2,ANGPTL4,ANKRD11,AP3D1,AP5B1,ARFGAP1,ARFGAP2,ARL5B,ASB3/GPR75-ASB3,ATF3,ATP1A1,ATP7B,AXIN1,AXIN2,B4GALT4,BAIAP2,BANP,BCAP29,BCAR3,BCL2L1,BCLAF3,BNIP3L,BTG3,C17orf80,CAMTA2,CAPN15,CARM1,CASKIN2,CASP3,CASS4,CBX4,CCL5,CCN1,CCNT1,CD36,CD47,CDC42EP4,CDKN1A,CDKN1B,CDON,CHERP,CHIC1,CHST8,CLK1,CNR1,CORO1C,CPSF1,CRE…	278
	Cancer,Organismal Injury and Abnormalities	Pelvic cancer	1.07e-07		0.038	ABCF1,ABTB2,ACIN1,ACTN1,ACTN4,ADAMTS1,ADAMTS15,ADAMTSL2,ADAP2,ADRA1A,AHDC1,AHR,AKAP7,ANGPT2,ANGPTL4,ANKRD11,AP3D1,AP5B1,ARFGAP1,ARFGAP2,ASB3/GPR75-ASB3,ATF3,ATP1A1,ATP7B,AXIN1,AXIN2,B4GALT4,BAIAP2,BANP,BCAP29,BCAR3,BCL2L1,BCLAF3,BNIP3L,BTG3,C17orf80,CAMTA2,CAPN15,CARM1,CASKIN2,CASP3,CASS4,CBX4,CCL5,CCN1,CCNT1,CD36,CD47,CDC42EP4,CDKN1A,CDKN1B,CDON,CHERP,CHIC1,CHST8,CLK1,CLK2,CNR1,CORO1C,CPSF1,CREB…	294
	Cell Death and Survival,Organismal Injury and Abnormalities	Cell death of myeloma cell lines	5.16e-08		0.037	BCL2L1,CASP3,CDKN1B,FOXO3,KLF10,KLF9,MYC,NR3C1,NR4A1,RARA,REL,SP1,STK4,TNF,UBA1	15
	Nutritional Disease,Organismal Injury and Abnormalities	Obesity	2.23e-06		0.036	ADAMTS1,ADARB1,ADRA1A,ANGPT2,ANGPTL4,ATF3,ATP7B,AXIN2,BCL2L1,CCL5,CD36,CDKN1A,CISH,CNR1,CREBRF,CXCL2,DIXDC1,E4F1,EPRS1,G0S2,GLP1R,GPAT4,HHEX,HSPA1A/HSPA1B,INSR,KLF15,LPIN2,MED12,MYC,MYH9,NR3C1,NR4A1,NR4A2,PRF1,PRKAA2,PTGS2,RAPGEF3,RIPK2,SERP1,SERTAD2,SIRT1,SLC25A25,TNF	43
	Cancer,Hematological Disease,Immunological Disease,Organismal Injury and Abnormalities	Lymphoma	3.12e-08		0.021	ABCF1,ADRA1A,AHR,ANGPT2,ATF2,ATF3,AXIN2,BCL2L1,BNIP3L,BTG1,BTG2,CASP3,CBX4,CCL5,CCN1,CD36,CD47,CDKN1A,CDKN1B,CDON,CHST8,CLK1,CNR1,CREBBP,CSK,CXXC1,CYB561,DAPK3,DNAJB14,DUSP5,FOSL2,FOXO3,GATA3,GGPS1,GPR157,HIC1,IER3,INTS3,KLF2,KLF4,KLF6,KSR1,LFNG,LIMK1,LRIG3,MAP9,MBD1,MED12,MYC,MYLIP,NR3C1,NR4A2,NUP98,P2RY10,PER2,PHC2,PIK3R5,PPP2R3C,PPRC1,PRF1,PRKD2,PTGS2,PTPRB,RAPGEF1,RARA,REL,RGCC,RGS16,RIN3,RLI…	94
	Cancer,Organismal Injury and Abnormalities	Head and neck tumor	2.35e-21		0.014	ABCF1,ABTB2,ACIN1,ACKR2,ACTN1,ACTN4,ADAMTS1,ADAMTS15,ADAMTSL2,ADAP2,ADARB1,ADRA1A,AEN,AHDC1,AHR,AKAP7,ALG6,AMMECR1L,AMOTL2,ANGPT2,ANGPTL4,ANKRD11,AP3D1,AP3M1,AP5B1,ARFGAP1,ARFGAP2,ARL5B,ASB3/GPR75-ASB3,ATF2,ATP1A1,ATP7B,AXIN1,AXIN2,B4GALT4,BAIAP2,BANP,BCAP29,BCAR3,BCL2L1,BCLAF3,BET1,BNIP3L,BOP1,BTG1,BTG2,BTG3,BYSL,C17orf80,C1GALT1C1,C9orf40,C9orf72,CAMTA2,CAPN15,CARM1,CASKIN2,CASP3,CASS4,CBX4,CCN…	411
	Cellular Development,Cellular Growth and Proliferation	Proliferation of progenitor cells	1.17e-07		0.01	AXIN1,BCL2L1,BTG1,CDKN1A,CDKN1B,CDON,CNR1,CXCL2,DNAJA3,EFNB1,EGR3,FGF7,FOXO3,GATA2,GATA3,GDNF,HES1,HOXA5,KLF10,KLF2,KLF4,MYC,MYH9,NR3C1,PTGS2,RARA,REL,S1PR1,SPRY1,SYK,TNF	31
	Lymphoid Tissue Structure and Development,Organ Morphology,Tissue Morphology	Quantity of thymus gland	2.2e-06		0.007	AHR,BCL2L1,CARM1,CASP3,CDKN1B,CREBBP,DNAJA3,DUSP5,EFNB1,EGR3,FGF7,KLF13,KLF4,NMT2,NR3C1,NR4A1,POLR3E,STK17B,STK4,TNF,UPF1	21
	Developmental Disorder,Neurological Disease,Organismal Injury and Abnormalities	Dysmyelination	1.75e-06		0	AHR,CCL3L3,CCL5,CD36,CDKN1B,CXCL2,CYTH1,EPRS1,HCAR2,NACC1,NADK2,NR3C1,PRF1,PRX,PTGS2,S1PR1,SIRT1,TNF,TNFRSF21	19
	Free Radical Scavenging	Metabolism of reactive oxygen species	2.21e-06		-0.002	AHR,ANGPT2,BCL2L1,BNIP3L,CASP3,CCL5,CCN1,CD36,CD47,CDKN1A,CRTC2,CXCL2,DLST,E4F1,FOXO3,GLP1R,INSR,KLF4,LIMK1,NR4A1,PFKFB3,POLG,PRF1,PRKAA2,PRX,PTGER4,PTGS2,RAPGEF1,RAPGEF3,RIPK2,RND3,SELENOP,SELENOT,SESN3,SIRT1,SYK,SYVN1,TNF,USP10,ZC3H12A	40
	Cell-mediated Immune Response,Cellular Development,Cellular Function and Maintenance,Cellular Growth and Proliferation,Embryonic Development,Hematological System Development and Function,Hematopoiesis,Lymphoid Tissue Structure and Development,Organ Development,Organismal Development,Tissue Development	Differentiation of T lymphocytes	1.03e-07		-0.021	AHR,AP3D1,ATF2,CCL5,CCN1,CDKN1B,CISH,DNAJA3,EFNB1,EGR3,FOXO3,Foxp1,GATA2,GATA3,HLX,KLF10,KLF4,KLHL25,LFNG,NFKBIZ,NR4A1,NR4A2,NRARP,PTGER4,PTGS2,RC3H1,REL,RGCC,RIPK2,S1PR1,SYK,TNF,Tnfsf9,ZFP36L1	34
	Cancer,Hematological Disease,Organismal Injury and Abnormalities	Hematopoietic neoplasm	6.28e-11		-0.03	ABCF1,ADAMTS15,ADRA1A,AEN,AHR,ANGPT2,ANGPTL4,ANKRD11,ASB3/GPR75-ASB3,ATF2,ATF3,AXIN1,AXIN2,BCAR3,BCL2L1,BNIP3L,BTG1,BTG2,C17orf80,C1GALT1C1,C9orf72,CAMTA2,CASP3,CBX4,CCL5,CCN1,CCNG2,CCNL1,CCNT1,CD36,CD47,CDC42EP3,CDKN1A,CDKN1B,CDON,CHIC1,CHST8,CLK1,CNR1,CPSF1,CREBBP,CSK,CWF19L2,CXCL2,CXCL6,CXXC1,CYB561,DAPK3,DCTN1,DEK,DIP2C,DNAJB14,DUSP16,DUSP5,DYNC1H1,E4F1,EP400,FAM167A,FEM1A,FGF7,FOSL2,FOXO3,GA…	198
	Hematological System Development and Function,Tissue Morphology	Quantity of mononuclear leukocytes	4.3e-10		-0.032	ACKR2,AHR,ANGPT2,ATF3,BCL2L1,Brd4,CARM1,CASP3,CCL5,CD36,CD47,CDKN1A,CDKN1B,CISH,CREBBP,CXCL6,DNAJA3,DUSP5,EFNB1,EGR3,FGF7,FOXO3,Foxp1,GATA2,GATA3,HCAR2,INSR,KLF10,KLF13,KLF2,KLF4,MYC,MYH9,NMT2,NQO2,NR3C1,NR4A1,NUP98,POLR3E,PRF1,RARA,RASSF2,RC3H1,REL,RGCC,RIPK2,RNF31,S1PR1,SH2D3C,SIRT1,ST3GAL4,STK17B,STK4,SYK,SYVN1,TLN1,TNF,TNFRSF21,TOB1,UPF1,YOD1,ZC3H12A	62
	Hematological System Development and Function,Tissue Development	Accumulation of blood cells	7.41e-07		-0.037	ACKR2,AHR,ANGPT2,CCL3L3,CCL5,CXCL2,EGR3,FEM1A,FOXO3,GATA2,GATAD2A,IER3,KLF2,KLF4,MYC,NR3C1,NR4A1,PTGS2,RGS16,S1PR1,SIRT1,STK4,TLN1,TNF,TNFRSF21,Tnfsf9	26
	Embryonic Development,Organismal Development,Tissue Development	Development of body axis	2.28e-10		-0.038	AHR,ANGPTL4,ANKRD11,ATF2,AXIN1,AXIN2,BCAR3,BCL2L1,BTG2,CASP3,CD36,CDKN1A,CDKN1B,CDON,CNR1,CORO1C,CREBBP,CSNK1D,DACT1,DIXDC1,DLGAP4,FGF7,FOSL2,FOXO3,GAK,GATA2,GATA3,GDNF,GNG5,GPM6A,HES1,HEY1,HHEX,HIRA,HOXA5,IER3IP1,INSIG1,KLF2,KLF4,LIMK1,LIMS2,LNX2,LRIG3,MAP3K1,MED12,MEOX2,MYC,NFKBIZ,NR3C1,NR4A1,NR4A2,NRP2,NSUN5,OGN,OSR1,PER2,PHC2,PITPNM1,PTCH1,PTGS2,PTPN23,RAPGEF1,RAPGEF3,RARA,S1PR1,SAMD4B,SCRIB,…	80
	Cancer,Hematological Disease,Organismal Injury and Abnormalities	Hematologic cancer	1.77e-10		-0.043	ABCF1,ADAMTS15,ADRA1A,AEN,AHR,ANGPT2,ANGPTL4,ANKRD11,ASB3/GPR75-ASB3,ATF2,ATF3,AXIN1,AXIN2,BCAR3,BCL2L1,BNIP3L,BTG1,BTG2,C17orf80,C1GALT1C1,C9orf72,CAMTA2,CASP3,CBX4,CCL5,CCN1,CCNG2,CCNL1,CCNT1,CD36,CD47,CDC42EP3,CDKN1A,CDKN1B,CDON,CHIC1,CHST8,CLK1,CNR1,CPSF1,CREBBP,CSK,CWF19L2,CXCL2,CXCL6,CXXC1,CYB561,DAPK3,DCTN1,DEK,DIP2C,DNAJB14,DUSP16,DUSP5,DYNC1H1,E4F1,EP400,FAM167A,FEM1A,FGF7,FOSL2,FOXO3,GA…	194
	Cellular Development,Cellular Growth and Proliferation	Cell proliferation of tumor cell lines	6.72e-11		-0.046	ACIN1,ACTN1,ACTN4,ADAMTS1,ADAMTS15,AHR,AMOTL2,ANGPT2,ANGPTL4,ATF2,ATF3,AXIN1,AXIN2,BCAR3,BCL2L1,BOP1,BTG2,BTG3,CASP3,CCN1,CCNG2,CDC42EP3,CDKN1A,CDKN1B,CNR1,CORO1C,CREBBP,CSNK1D,DACT1,DAPK3,DEK,DLST,DNAJA3,DNAJB4,DUSP5,DYNC1H1,E4F1,EHF,FBXO32,FGF7,FKBP5,FOSL2,FOXO3,G0S2,GATA2,GATA3,GATA6,GDNF,GGPS1,GLUL,GPS2,HAS1,HES1,HIC1,IER3,INSR,KAT2B,KIRREL1,KLF10,KLF2,KLF4,KLF6,KLF7,KLF9,KSR1,LIMK1,LPAR3,MAR…	128
	Cancer,Hematological Disease,Organismal Injury and Abnormalities	Hematologic cancer of cells	4.8e-09		-0.046	ABCF1,ADAMTS15,ADRA1A,AEN,AHR,ANGPT2,ANKRD11,ATF2,ATF3,AXIN2,BCAR3,BCL2L1,BNIP3L,BTG1,BTG2,C17orf80,C1GALT1C1,CAMTA2,CASP3,CBX4,CCL5,CCN1,CD36,CD47,CDC42EP3,CDKN1A,CDKN1B,CDON,CHIC1,CHST8,CLK1,CNR1,CPSF1,CREBBP,CSK,CWF19L2,CXCL2,CXCL6,CXXC1,CYB561,DAPK3,DNAJB14,DUSP16,DUSP5,EP400,FAM167A,FEM1A,FGF7,FOSL2,FOXO3,GATA2,GATA3,GATA5,GGPS1,GPR157,HHEX,HIC1,IER3,INTS3,KCNE4,KCNK13,KLF2,KLF4,KLF6,KLF9,KS…	141
	Cellular Assembly and Organization,Cellular Function and Maintenance	Microtubule dynamics	2.41e-07		-0.065	ACTN4,ADAMTS1,AHR,ANGPT2,ANGPTL4,ATF3,AXIN1,BAIAP2,BCAR3,BTG2,BTG3,C9orf72,CARM1,CASP3,CCL5,CCN1,CD47,CDC42EP4,CDKN1A,CDKN1B,CNR1,CORO1C,CREBBP,CSNK1D,CXCL6,DACT1,DBNL,DCTN1,DIXDC1,DPYSL2,DYNC1H1,EFNB1,EGR3,FAM107A,FGF7,GAK,GATA3,GDNF,GPM6A,HES1,HSPA1A/HSPA1B,INSR,KAT2B,KCNJ2,KDM5C,KLF2,KLF7,KLF9,LIMK1,MAP3K1,MAP9,MARK4,MYC,MYH9,MYLIP,NR3C1,NR4A1,NRP2,NUDCD3,PITPNM1,PLK2,PRKAA2,PTCH1,PTGS2,PTPN23…	82
	Cellular Development,Cellular Growth and Proliferation,Hematological System Development and Function,Hematopoiesis,Lymphoid Tissue Structure and Development,Tissue Development	Hematopoiesis of mononuclear leukocytes	1.52e-09		-0.067	AHR,AP3D1,ATF2,BCL2L1,CARM1,CCL5,CCN1,CD36,CDKN1A,CDKN1B,CISH,CREBBP,CRTC2,CSK,DNAJA3,DUSP5,EFNB1,EGR3,FOXO3,Foxp1,GATA2,GATA3,GPS2,HHEX,HLX,KLF10,KLF2,KLF4,KLHL25,LFNG,MYC,NFKBIZ,NMT2,NQO2,NR4A1,NR4A2,NRARP,PPP2R3C,PRF1,PTGER4,PTGS2,RARA,RC3H1,REL,RGCC,RIPK2,S1PR1,SIRT1,SOX11,SYK,TLN1,TNF,Tnfsf9,ZC3H12A,ZFP36L1	55
	Cancer,Organismal Injury and Abnormalities	Lymphatic system tumor	2.35e-10		-0.07	ABCF1,ADAMTS15,ADRA1A,AEN,AHR,ANGPT2,ANKRD11,ATF2,ATF3,AXIN1,AXIN2,BCAR3,BCL2L1,BNIP3L,BTG1,BTG2,C17orf80,C1GALT1C1,C9orf72,CAMTA2,CASP3,CBX4,CCL5,CCN1,CCNG2,CD36,CD47,CDC42EP3,CDKN1A,CDKN1B,CDON,CHIC1,CHST8,CLK1,CNR1,CPSF1,CREBBP,CSK,CWF19L2,CXCL2,CXCL6,CXXC1,CYB561,DAPK3,DEK,DIP2C,DNAJB14,DUSP16,DUSP5,EP400,FAM167A,FEM1A,FGF7,FOSL2,FOXO3,GATA2,GATA3,GATA5,GGPS1,GPR157,GTF3C3,HAS1,HHEX,HIC1,HOXA…	162
	Cellular Movement	Migration of tumor cell lines	5.13e-06		-0.079	ACTN1,ACTN4,AHR,ANGPT2,ANGPTL4,ATF3,AXIN2,BANP,BCAR3,BCL2L1,CCL5,CCN1,CD36,CD47,CDC42EP3,CDKN1A,CDKN1B,CORO1C,CSK,CXCL2,DACT1,DNAJA3,DPYSL2,DUSP5,EFNB1,EHF,FGF7,FOXO3,GATA3,GATA5,GDNF,GLUL,HAS1,HES1,HHEX,HIC1,HSPA1A/HSPA1B,KLF2,KLF4,KLF6,KLF9,LIMK1,MAP3K1,MARK4,MOB4,MYC,MYH9,NR4A1,NR4A2,NRP2,PFKFB4,PHLDA1,PIK3R5,PRKD2,PTGER4,PTGS2,RAPGEF3,RNF144B,SCRIB,SIRT1,SP1,SYK,TLN1,TNF,TNFRSF21,TOB1,TPD52,T…	70
	Cancer,Organismal Injury and Abnormalities	Growth of malignant tumor	4.21e-07		-0.086	ATF2,ATF3,BCL2L1,BNIP3L,BTG2,BTG3,CASP3,CCN1,CD47,CDKN1B,EGR3,FOXO3,GDNF,HES1,IER3,INSR,KLF7,MYC,NR4A1,NR4A2,PFKFB3,PLK2,PTCH1,PTCH2,PTGER4,PTGS2,RAD17,RARA,RASSF2,RND3,RNF31,SIRT1,SOX11,SP1,TNF,TPD52,UBA1,ZC3H12A	38
	Cancer,Organismal Injury and Abnormalities	Extrapancreatic malignant tumor	3.5e-17		-0.094	ABCF1,ABTB2,ACIN1,ACKR2,ACTN1,ACTN4,ADAMTS1,ADAMTS15,ADAMTSL2,ADAP2,ADARB1,ADRA1A,AEN,AHDC1,AHR,AKAP7,ALG6,AMMECR1L,AMOTL2,ANAPC13,ANGPT2,ANGPTL4,ANKRD11,AP3D1,AP3M1,AP5B1,ARFGAP1,ARFGAP2,ARL4D,ARL5B,ASB3/GPR75-ASB3,ATF2,ATF3,ATP1A1,ATP7B,AXIN1,AXIN2,B4GALT4,BAIAP2,BANP,BCAP29,BCAR3,BCL2L1,BCLAF3,BET1,BNIP3L,BOP1,BTG1,BTG2,BTG3,BYSL,C17orf80,C1GALT1C1,C6orf62,C9orf72,CAMTA2,CAPN15,CARM1,CASKIN2,C…	439
	Hematological System Development and Function,Immune Cell Trafficking,Inflammatory Response,Tissue Development	Accumulation of leukocytes	1.77e-06		-0.094	ACKR2,AHR,ANGPT2,CCL3L3,CCL5,CXCL2,EGR3,FEM1A,FOXO3,GATAD2A,IER3,KLF2,KLF4,NR3C1,NR4A1,PTGS2,RGS16,S1PR1,SIRT1,STK4,TLN1,TNF,TNFRSF21,Tnfsf9	24
	Cancer,Hematological Disease,Immunological Disease,Organismal Injury and Abnormalities	Lymphocytic cancer	1.25e-10		-0.095	ABCF1,ADAMTS15,ADRA1A,AEN,AHR,ANGPT2,ANKRD11,ATF2,ATF3,AXIN1,AXIN2,BCAR3,BCL2L1,BNIP3L,BTG1,BTG2,C17orf80,C1GALT1C1,C9orf72,CAMTA2,CASP3,CBX4,CCL5,CCN1,CCNG2,CD36,CD47,CDC42EP3,CDKN1A,CDKN1B,CDON,CHIC1,CHST8,CLK1,CNR1,CPSF1,CREBBP,CSK,CWF19L2,CXCL2,CXCL6,CXXC1,CYB561,DAPK3,DEK,DIP2C,DNAJB14,DUSP16,DUSP5,EP400,FAM167A,FEM1A,FGF7,FOSL2,FOXO3,GATA2,GATA3,GATA5,GGPS1,GPR157,GTF3C3,HAS1,HHEX,HIC1,HOXA…	161
	Cancer,Hematological Disease,Organismal Injury and Abnormalities	Malignant lymphocytic neoplasm	1.25e-10		-0.095	ABCF1,ADAMTS15,ADRA1A,AEN,AHR,ANGPT2,ANKRD11,ATF2,ATF3,AXIN1,AXIN2,BCAR3,BCL2L1,BNIP3L,BTG1,BTG2,C17orf80,C1GALT1C1,C9orf72,CAMTA2,CASP3,CBX4,CCL5,CCN1,CCNG2,CD36,CD47,CDC42EP3,CDKN1A,CDKN1B,CDON,CHIC1,CHST8,CLK1,CNR1,CPSF1,CREBBP,CSK,CWF19L2,CXCL2,CXCL6,CXXC1,CYB561,DAPK3,DEK,DIP2C,DNAJB14,DUSP16,DUSP5,EP400,FAM167A,FEM1A,FGF7,FOSL2,FOXO3,GATA2,GATA3,GATA5,GGPS1,GPR157,GTF3C3,HAS1,HHEX,HIC1,HOXA…	161
	Cancer,Hematological Disease,Organismal Injury and Abnormalities	Neoplasia of blood cells	1.25e-09		-0.096	ABCF1,ADAMTS15,ADRA1A,AEN,AHR,ANGPT2,ANGPTL4,ANKRD11,ASB3/GPR75-ASB3,ATF2,ATF3,AXIN1,AXIN2,BCAR3,BCL2L1,BNIP3L,BTG1,BTG2,C17orf80,C1GALT1C1,CAMTA2,CASP3,CBX4,CCL5,CCN1,CCNG2,CCNL1,CCNT1,CD36,CD47,CDC42EP3,CDKN1A,CDKN1B,CDON,CHIC1,CHST8,CLK1,CNR1,CPSF1,CREBBP,CSK,CWF19L2,CXCL2,CXCL6,CXXC1,CYB561,DAPK3,DCTN1,DEK,DNAJB14,DUSP16,DUSP5,DYNC1H1,E4F1,EP400,FAM167A,FEM1A,FGF7,FOSL2,FOXO3,GATA2,GATA3,GATA…	185
	Cellular Movement	Migration of vascular cells	4.4e-07		-0.096	ADAMTS1,ANGPT2,ATF2,ATF3,CCL5,CCN1,CD36,CDKN1B,EGR3,FOXO3,GATA3,GATA6,GLUL,HHEX,HLX,KLF2,MEOX2,NR4A1,NR4A2,PRKD2,PTGS2,S1PR1,SPRY4,TNF	24
	Connective Tissue Development and Function,Tissue Morphology	Quantity of adipose tissue	2.39e-06		-0.099	ADAMTS1,ANGPTL4,ATF2,CD36,CDKN1A,CDKN1B,CNR1,DNAJB4,G0S2,GATA2,GLP1R,GPAT4,INSIG1,INSR,KSR1,MEOX2,MYC,NR3C1,NUCKS1,RAPGEF3,RUNX1T1,SGMS1,SLC25A25,TNF	24
	Hematological System Development and Function,Lymphoid Tissue Structure and Development,Tissue Morphology	Quantity of lymphocytes	1.76e-10		-0.1	ACKR2,AHR,ANGPT2,BCL2L1,Brd4,CARM1,CASP3,CCL5,CD36,CD47,CDKN1A,CDKN1B,CISH,CREBBP,CXCL6,DNAJA3,DUSP5,EFNB1,EGR3,FGF7,FOXO3,Foxp1,GATA2,GATA3,HCAR2,INSR,KLF10,KLF13,KLF2,KLF4,MYC,MYH9,NMT2,NQO2,NR3C1,NR4A1,NUP98,POLR3E,PRF1,RARA,RASSF2,RC3H1,REL,RGCC,RIPK2,RNF31,S1PR1,SH2D3C,SIRT1,ST3GAL4,STK17B,STK4,SYK,SYVN1,TLN1,TNF,TNFRSF21,TOB1,UPF1,YOD1,ZC3H12A	61
	Hematological System Development and Function,Tissue Morphology	Quantity of myeloid cells	1.38e-07		-0.101	AHR,ANGPT2,ATF3,BCL2L1,BNIP3L,CCL3L3,CD36,CD47,CDKN1A,CDKN1B,CISH,CREBBP,CSK,CXCL2,CXCL6,DUSP5,FGF7,FOSL2,FOXO3,GATA2,GATA3,GATA6,GPS2,HIC1,HOXA5,INSR,KLF13,KLF2,MYC,NQO2,NR3C1,NR4A1,PIK3R5,PLSCR1,PRF1,PTGER2,PTGS2,RASSF2,REL,RIPK2,RNF31,SIRT1,ST3GAL4,STK4,TET1,TNF,YOD1	47
	Cancer,Organismal Injury and Abnormalities,Reproductive System Disease	Genital tumor	2.82e-09		-0.109	ABCF1,ABTB2,ACIN1,ACTN1,ACTN4,ADAMTS1,ADAMTS15,ADAMTSL2,ADAP2,ADARB1,ADRA1A,AHDC1,AHR,AKAP7,ANGPT2,ANGPTL4,ANKRD11,AP3D1,AP5B1,ARFGAP1,ARFGAP2,ARL4D,ARL5B,ASB3/GPR75-ASB3,ATF3,ATP1A1,ATP7B,AXIN1,AXIN2,B4GALT4,BAIAP2,BANP,BCAP29,BCAR3,BCL2L1,BCLAF3,BNIP3L,BTG3,C17orf80,CAMTA2,CAPN15,CARM1,CASKIN2,CASP3,CASS4,CBX4,CCL5,CCN1,CCNT1,CD36,CD47,CDC42EP3,CDC42EP4,CDKN1A,CDKN1B,CDON,CHERP,CHIC1,CHST8,CLK1…	288
	Cellular Development,Cellular Growth and Proliferation,Embryonic Development,Hematological System Development and Function,Hematopoiesis,Lymphoid Tissue Structure and Development,Organ Development,Organismal Development,Tissue Development	Lymphopoiesis	5.25e-10		-0.133	AHR,AP3D1,ATF2,BCL2L1,CARM1,CCL5,CCN1,CD36,CDKN1A,CDKN1B,CISH,CREBBP,CRTC2,CSK,DNAJA3,DUSP5,EFNB1,EGR3,FOXO3,Foxp1,GATA2,GATA3,GPS2,HHEX,HLX,KLF10,KLF2,KLF4,KLHL25,LFNG,MYC,NFKBIZ,NMT2,NQO2,NR4A1,NR4A2,NRARP,PPP2R3C,PRF1,PTGER4,PTGS2,RC3H1,REL,RGCC,RIPK2,S1PR1,SIRT1,SOX11,SYK,TLN1,TNF,Tnfsf9,ZC3H12A,ZFP36L1	54
	Hematological System Development and Function,Hematopoiesis,Tissue Morphology	Quantity of hematopoietic progenitor cells	4.48e-08		-0.135	AHR,BCL2L1,BNIP3L,CARM1,CASP3,CD36,CD47,CDKN1A,CDKN1B,CREBBP,CSK,DEK,DNAJA3,DUSP5,EFNB1,EGR3,FOSL2,FOXO3,GATA2,GPS2,HOXA5,KLF13,KLF2,KLF4,MYC,NMT2,NR3C1,NR4A1,PER2,POLR3E,RASSF2,REL,SIRT1,STK17B,STK4,SYK,TNF,UPF1	38
	Free Radical Scavenging	Synthesis of reactive oxygen species	4.11e-06		-0.146	AHR,ANGPT2,BCL2L1,BNIP3L,CASP3,CCL5,CCN1,CD36,CD47,CDKN1A,CRTC2,CXCL2,DLST,E4F1,FOXO3,GLP1R,INSR,KLF4,LIMK1,NR4A1,PFKFB3,POLG,PRF1,PRKAA2,PTGER4,PTGS2,RAPGEF1,RAPGEF3,RIPK2,RND3,SELENOT,SESN3,SIRT1,SYK,SYVN1,TNF,USP10,ZC3H12A	38
	Cancer,Organismal Injury and Abnormalities	Lymphoreticular neoplasm	9.63e-09		-0.147	ABCF1,ADRA1A,AHR,ANGPT2,ANGPTL4,ANKRD11,ASB3/GPR75-ASB3,ATF2,ATF3,AXIN1,AXIN2,BCL2L1,BNIP3L,BTG1,BTG2,C1GALT1C1,CASP3,CBX4,CCL5,CCN1,CCNL1,CCNT1,CD36,CD47,CDC42EP3,CDKN1A,CDKN1B,CDON,CHST8,CLK1,CNR1,CREBBP,CSK,CXXC1,CYB561,DAPK3,DCTN1,DEK,DNAJB14,DUSP5,DYNC1H1,E4F1,EP400,FOSL2,FOXO3,GATA2,GATA3,GGPS1,GPR157,HEATR6,HES1,HEY1,HIC1,HLX,HSPA1A/HSPA1B,IER3,INSR,INTS3,KDM5C,KIRREL1,KLF10,KLF2,KLF4,KLF6…	145
	Cell-mediated Immune Response,Cellular Movement,Hematological System Development and Function,Immune Cell Trafficking	T cell migration	1.6e-07		-0.155	ACKR2,ANGPT2,Brd4,CCL3L3,CCL5,CD47,DBNL,DEK,DPYSL2,Foxp1,GATA3,INSR,KLF2,LIMK1,MYH9,NR3C1,NR4A1,P2RY10,PRF1,PTGS2,PTPRB,RGS16,S1PR1,STK4,TLN1,TNF,TNFRSF21,Tnfsf9	28
	Cancer,Organismal Injury and Abnormalities	Ductal carcinoma	6.14e-09		-0.179	ABTB2,ACTN4,ADAMTS15,ADARB1,AKAP7,ANGPT2,ANGPTL4,ANKRD11,AP3D1,ASB3/GPR75-ASB3,ATF2,ATP7B,AXIN1,AXIN2,BAIAP2,BCAR3,BCL2L1,C1GALT1C1,CAMTA2,CARM1,CASKIN2,CASP3,CASS4,CCL3L3,CCL5,CCN1,CCNG2,CCNL1,CDC42EP3,CDKN1A,CDKN1B,CDON,CHERP,CHST8,CLK1,CLK2,CNKSR3,CPSF1,CREB3L4,CREBBP,CWF19L2,CXCL2,CXCL6,DACT1,DAPK3,DCTN1,DEK,DIP2C,DLST,DOLK,DRAM2,DUSP16,DYNC1H1,E4F1,EP400,ERCC5,FBXO33,FEM1A,FOSL2,FOXO3,FPGT,G…	153
	Cancer,Gastrointestinal Disease,Organismal Injury and Abnormalities	Pancreaticobiliary carcinoma	1.03e-06		-0.179	ABTB2,ACTN4,ADAMTS15,ADARB1,AHR,AKAP7,ANGPT2,ANKRD11,AP3D1,ASB3/GPR75-ASB3,ATF2,ATP7B,AXIN1,AXIN2,BAIAP2,BCAR3,BCL2L1,CAMTA2,CARM1,CASKIN2,CASS4,CCL3L3,CCL5,CCN1,CCNL1,CDKN1A,CDON,CHERP,CHST8,CLK1,CLK2,CNKSR3,CPSF1,CREB3L4,CREBBP,CWF19L2,CXCL2,CXCL6,DCTN1,DDX54,DEK,DIP2C,DLST,DOLK,DRAM2,DTX2,DUSP16,E4F1,EP400,FBXO33,FEM1A,FOSL2,GAK,GATA3,GATA6,GATAD2A,GEMIN5,GINM1,GPS2,GRAMD2A,GTF3C3,HAS1,HEATR6,…	137
	Cancer,Gastrointestinal Disease,Organismal Injury and Abnormalities	Pancreatobiliary adenocarcinoma	5.3e-06		-0.179	ABTB2,ACTN4,ADAMTS15,ADARB1,AKAP7,ANGPT2,ANKRD11,AP3D1,ASB3/GPR75-ASB3,ATF2,ATP7B,AXIN1,BAIAP2,BCAR3,BCL2L1,CAMTA2,CARM1,CASKIN2,CASS4,CCL3L3,CCL5,CCN1,CCNL1,CDKN1A,CDON,CHERP,CLK1,CNKSR3,CPSF1,CREB3L4,CREBBP,CWF19L2,CXCL2,CXCL6,DCTN1,DDX54,DIP2C,DOLK,DRAM2,DTX2,DUSP16,E4F1,EP400,FBXO33,FEM1A,FOSL2,GATA3,GATA6,GATAD2A,GINM1,GPS2,GRAMD2A,GTF3C3,HAS1,HIRA,JADE2,KCNS3,KLF4,KLF6,KLF7,LFNG,LIMK1,LIMS2…	117
	Cell Cycle	S phase of tumor cell lines	9.64e-06		-0.18	AHR,BCL2L1,CCNG2,CDKN1A,CDKN1B,FOXO3,GATA5,MYC,NUCKS1,PFKFB3,PRKAA2,RNF31,SLX4,TNF	14
	Cancer,Organismal Injury and Abnormalities	Development of carcinoma	9.53e-13		-0.185	ABCF1,ABTB2,ACIN1,ACKR2,ACTN1,ACTN4,ADAMTS1,ADAMTS15,ADAMTSL2,ADAP2,ADARB1,ADRA1A,AHDC1,AHR,AKAP7,AMMECR1L,AMOTL2,ANGPT2,ANGPTL4,ANKRD11,AP3D1,ARFGAP1,ARFGAP2,ASB3/GPR75-ASB3,ATF3,ATP1A1,ATP7B,AXIN1,AXIN2,B4GALT4,BAIAP2,BANP,BCAP29,BCAR3,BCL2L1,BCLAF3,BNIP3L,BTG3,C17orf80,C6orf62,CAMTA2,CAPN15,CARM1,CASKIN2,CASP3,CASS4,CBX4,CCN1,CCNG2,CCNT1,CD36,CD47,CDC42EP3,CDKN1A,CDKN1B,CDON,CEPT1,CHERP,CHIC1,…	346
	Cancer,Hematological Disease,Organismal Injury and Abnormalities	Mature lymphocytic neoplasm	1.79e-08		-0.187	ABCF1,ADAMTS15,ADRA1A,AEN,AHR,ANGPT2,ANKRD11,ATF3,AXIN1,AXIN2,BCAR3,BCL2L1,BNIP3L,BTG1,BTG2,C17orf80,CAMTA2,CASP3,CBX4,CCL5,CCN1,CCNG2,CD36,CD47,CDC42EP3,CDKN1A,CDKN1B,CDON,CHST8,CLK1,CNR1,CPSF1,CREBBP,CSK,CXCL2,CXCL6,CXXC1,DAPK3,DEK,DNAJB14,DUSP16,DUSP5,EP400,FEM1A,FGF7,FOXO3,GATA3,GATA5,GGPS1,HAS1,HIC1,INTS3,KCNK13,KDM5C,KLF2,KLF6,KLF9,KSR1,LAPTM4A,LPIN2,LRIG3,MAP9,MARF1,MBD1,MED12,MYC,MYLIP,NR…	117
	Hematological System Development and Function,Tissue Morphology	Quantity of leukocytes	4.03e-10		-0.194	ACKR2,AHR,ANGPT2,ATF3,BCL2L1,Brd4,CARM1,CASP3,CCL3L3,CCL5,CD36,CD47,CDKN1A,CDKN1B,CISH,CREBBP,CXCL2,CXCL6,DNAJA3,DUSP5,EFNB1,EGR3,FGF7,FOSL2,FOXO3,Foxp1,GATA2,GATA3,HCAR2,HIC1,INSR,KLF10,KLF13,KLF2,KLF4,KLF6,MYC,MYH9,NMT2,NQO2,NR3C1,NR4A1,NUP98,PIK3R5,PLSCR1,POLR3E,PRF1,PTGER2,PTGS2,RARA,RASSF2,RC3H1,REL,RGCC,RIPK2,RNF31,S1PR1,SH2D3C,SIRT1,ST3GAL4,STK17B,STK4,SYK,SYVN1,TET1,TLN1,TNF,TNFRSF21,TOB1…	72
	Tissue Morphology	Quantity of progenitor cells	5.1e-08		-0.223	AHR,ANGPT2,BCL2L1,BNIP3L,CARM1,CASP3,CD36,CD47,CDKN1A,CDKN1B,CREBBP,CSK,DEK,DNAJA3,DUSP5,EFNB1,EGR3,FOSL2,FOXO3,GATA2,GPS2,HOXA5,KLF13,KLF2,KLF4,MYC,NMT2,NR3C1,NR4A1,PER2,POLR3E,RASSF2,REL,SIRT1,STK17B,STK4,SYK,TNF,UPF1	39
	Organ Morphology,Renal and Urological System Development and Function	Quantity of kidney	4.75e-06		-0.234	ACTN4,CDKN1A,DACT1,FGF7,FOXO3,GDNF,PTGS2,RARA,SIRT1,SPRY1	10
	Hematological System Development and Function,Lymphoid Tissue Structure and Development,Tissue Morphology	Quantity of T lymphocytes	6.18e-09		-0.235	ACKR2,AHR,ANGPT2,BCL2L1,Brd4,CARM1,CASP3,CCL5,CD47,CDKN1A,CDKN1B,CISH,CREBBP,DNAJA3,DUSP5,EFNB1,EGR3,FGF7,FOXO3,GATA3,INSR,KLF10,KLF13,KLF4,MYC,NMT2,NR3C1,NR4A1,NUP98,POLR3E,PRF1,RASSF2,RC3H1,REL,RGCC,S1PR1,SH2D3C,SIRT1,STK17B,STK4,SYK,TLN1,TNF,TNFRSF21,TOB1,UPF1,ZC3H12A	47
	Cancer,Gastrointestinal Disease,Organismal Injury and Abnormalities	Digestive system cancer	2.62e-15		-0.237	ABCF1,ABTB2,ACIN1,ACKR2,ACTN1,ACTN4,ADAMTS1,ADAMTS15,ADAMTSL2,ADAP2,ADARB1,ADRA1A,AEN,AHDC1,AHR,AKAP7,ALG6,AMMECR1L,AMOTL2,ANGPT2,ANGPTL4,ANKRD11,AP3D1,AP3M1,AP5B1,ARFGAP1,ARFGAP2,ARL4D,ARL5B,ASB3/GPR75-ASB3,ATF2,ATF3,ATP1A1,ATP7B,AXIN1,AXIN2,B4GALT4,BAIAP2,BANP,BCAP29,BCAR3,BCL2L1,BCLAF3,BNIP3L,BOP1,BTG1,BTG3,BYSL,C17orf80,C9orf72,CAMTA2,CAPN15,CARM1,CASKIN2,CASP3,CASS4,CBX4,CCL3L3,CCL5,CCN1,CCN…	402
	Hematological System Development and Function,Tissue Morphology	Quantity of blood cells	1.23e-10		-0.238	ACKR2,AHR,ANGPT2,ATF3,BCL2L1,BNIP3L,Brd4,CARM1,CASP3,CCL3L3,CCL5,CD36,CD47,CDKN1A,CDKN1B,CISH,CREBBP,CSK,CXCL2,CXCL6,DEK,DNAJA3,DUSP5,EFNB1,EGR3,FGF7,FOSL2,FOXO3,Foxp1,GATA2,GATA3,GATA6,GPS2,HCAR2,HIC1,HOXA5,INSR,KLF10,KLF13,KLF2,KLF4,KLF6,MYC,MYH9,NMT2,NQO2,NR3C1,NR4A1,NUP98,PER2,PIK3R5,PLSCR1,POLR3E,PRF1,PTGER2,PTGS2,RARA,RASSF2,RC3H1,REL,RGCC,RIPK2,RNF31,S1PR1,SH2D3C,SIRT1,ST3GAL4,STK17B,STK4,…	79
	Lymphoid Tissue Structure and Development,Tissue Morphology	Quantity of lymphoid tissue	1.75e-06		-0.239	AHR,BCL2L1,BNIP3L,CARM1,CASP3,CDKN1A,CDKN1B,CREBBP,DNAJA3,DUSP5,EFNB1,EGR3,FGF7,GATA2,KLF13,KLF2,KLF4,MYC,MYH9,NMT2,NR3C1,NR4A1,POLR3E,PRF1,REL,SH2D3C,STK17B,STK4,TNF,UPF1	30
	Cellular Movement,Immune Cell Trafficking	Migration of lymphatic system cells	3.15e-08		-0.245	ACKR2,ANGPT2,Brd4,CCL3L3,CCL5,CD47,CXCL6,DBNL,DEK,DPYSL2,Foxp1,GATA3,INSR,KLF2,LIMK1,MYH9,NR3C1,NR4A1,P2RY10,PRF1,PTGS2,PTPRB,RAPGEF1,RGS16,S1PR1,SCRIB,SERP1,SH2D3C,SOX11,STK4,SYK,TLN1,TNF,TNFRSF21,Tnfsf9	35
	Cellular Assembly and Organization,Cellular Function and Maintenance	Organization of cytoskeleton	2.97e-07		-0.252	ACTN1,ACTN4,ADAMTS1,AHR,ANGPT2,ANGPTL4,ATF2,ATF3,AXIN1,BAIAP2,BCAR3,BTG2,BTG3,C9orf72,CARM1,CASP3,CCL5,CCN1,CD47,CDC42EP4,CDKN1A,CDKN1B,CNR1,CORO1C,CREBBP,CSK,CSNK1D,CXCL6,DACT1,DAPK3,DBNL,DCTN1,DIXDC1,DNAJA3,DPYSL2,DYNC1H1,EFNB1,EGR3,FAM107A,FGF7,GAK,GATA3,GDNF,GPM6A,HES1,HSPA1A/HSPA1B,INSR,KAT2B,KCNJ2,KDM5C,KIRREL1,KLF2,KLF7,KLF9,LIMK1,MAP3K1,MAP9,MARK4,MYC,MYH9,MYLIP,NR3C1,NR4A1,NRP2,NUDCD3,PI…	90
	Cellular Assembly and Organization,Cellular Function and Maintenance	Organization of cytoplasm	3.28e-07		-0.252	ACTN1,ACTN4,ADAMTS1,AHR,ANGPT2,ANGPTL4,ATF2,ATF3,AXIN1,BAIAP2,BCAR3,BTG2,BTG3,C9orf72,CARM1,CASP3,CCL5,CCN1,CD47,CDC42EP4,CDKN1A,CDKN1B,CNR1,CORO1C,CREBBP,CSK,CSNK1D,CXCL6,DACT1,DAPK3,DBNL,DCTN1,DIXDC1,DNAJA3,DPYSL2,DYNC1H1,EFNB1,EGR3,FAM107A,FGF7,GAK,GATA3,GDNF,GPM6A,HES1,HSPA1A/HSPA1B,INSR,KAT2B,KCNJ2,KDM5C,KIRREL1,KLF2,KLF7,KLF9,LIMK1,LYSMD3,MAP3K1,MAP9,MARK4,MYC,MYH9,MYLIP,NPLOC4,NR3C1,NR4A1,…	96
	Cancer,Organismal Injury and Abnormalities	Development of malignant tumor	7.88e-14		-0.265	ABCF1,ABTB2,ACIN1,ACKR2,ACTN1,ACTN4,ADAMTS1,ADAMTS15,ADAMTSL2,ADAP2,ADARB1,ADRA1A,AHDC1,AHR,AKAP7,AMMECR1L,AMOTL2,ANGPT2,ANGPTL4,ANKRD11,AP3D1,ARFGAP1,ARFGAP2,ASB3/GPR75-ASB3,ATF3,ATP1A1,ATP7B,AXIN1,AXIN2,B4GALT4,BAIAP2,BANP,BCAP29,BCAR3,BCL2L1,BCLAF3,BNIP3L,BTG2,BTG3,C17orf80,C6orf62,CAMTA2,CAPN15,CARM1,CASKIN2,CASP3,CASS4,CBX4,CCL5,CCN1,CCNG2,CCNT1,CD36,CD47,CDC42EP3,CDKN1A,CDKN1B,CDON,CEPT1,CH…	352
	Hematological System Development and Function,Hematopoiesis,Lymphoid Tissue Structure and Development,Organ Morphology,Tissue Morphology	Quantity of thymocytes	5.72e-06		-0.275	AHR,BCL2L1,CARM1,CASP3,CDKN1B,CREBBP,DNAJA3,DUSP5,EFNB1,EGR3,KLF13,KLF4,NMT2,NR3C1,NR4A1,POLR3E,STK17B,STK4,TNF,UPF1	20
	Cancer,Hematological Disease,Immunological Disease,Organismal Injury and Abnormalities	Tumorigenesis of lymphocytes	2.1e-09		-0.286	ABCF1,ADRA1A,AHR,ANGPT2,ATF2,ATF3,AXIN1,AXIN2,BCL2L1,BNIP3L,BTG1,BTG2,C1GALT1C1,CASP3,CBX4,CCL5,CCN1,CCNG2,CD36,CD47,CDC42EP3,CDKN1A,CDKN1B,CDON,CHIC1,CHST8,CLK1,CNR1,CREBBP,CSK,CWF19L2,CXCL2,CXCL6,CXXC1,CYB561,DAPK3,DEK,DNAJB14,DUSP16,DUSP5,EP400,FAM167A,FOSL2,FOXO3,GATA3,GATA5,GGPS1,GPR157,HAS1,HHEX,HIC1,IER3,INTS3,KCNK13,KDM5C,KLF2,KLF4,KLF6,KSR1,LFNG,LIMK1,LNX2,LPIN2,LRIG3,MAP9,MBD1,MED12,MYC…	133
	Cancer,Gastrointestinal Disease,Organismal Injury and Abnormalities	Hepato-pancreato-biliary cancer	1e-08		-0.286	ABTB2,ACTN4,ADAMTS1,ADAMTS15,ADARB1,ADRA1A,AHDC1,AHR,AKAP7,ANGPT2,ANKRD11,AP3D1,AP5B1,ARFGAP1,ARL4D,ASB3/GPR75-ASB3,ATF2,ATP1A1,ATP7B,AXIN1,AXIN2,B4GALT4,BAIAP2,BANP,BCAP29,BCAR3,BCL2L1,BOP1,BTG3,CAMTA2,CAPN15,CARM1,CASKIN2,CASP3,CASS4,CBX4,CCL3L3,CCL5,CCN1,CCNL1,CCNT1,CD36,CD47,CDC42EP3,CDKN1A,CDKN1B,CDON,CHERP,CHST8,CISH,CLK1,CLK2,CNKSR3,CNR1,CPSF1,CREB3L4,CREBBP,CTDP1,CWF19L2,CXCL2,CXCL6,CYB56…	254
	Cancer,Organismal Injury and Abnormalities	Abdominal cancer	2.94e-14		-0.294	ABCF1,ABTB2,ACIN1,ACKR2,ACTN1,ACTN4,ADAMTS1,ADAMTS15,ADAMTSL2,ADAP2,ADARB1,ADRA1A,AEN,AHDC1,AHR,AKAP7,ALG6,AMMECR1L,AMOTL2,ANGPT2,ANGPTL4,ANKRD11,AP3D1,AP3M1,AP5B1,ARFGAP1,ARFGAP2,ARL4D,ARL5B,ASB3/GPR75-ASB3,ATF2,ATF3,ATP1A1,ATP7B,AXIN1,AXIN2,B4GALT4,BAIAP2,BANP,BCAP29,BCAR3,BCL2L1,BCLAF3,BNIP3L,BOP1,BTG1,BTG2,BTG3,BYSL,C17orf80,C6orf62,C9orf72,CAMTA2,CAPN15,CARM1,CASKIN2,CASP3,CASS4,CBX4,CCL3L3,…	418
	Embryonic Development,Organismal Development,Tissue Development	Growth of head	1.15e-07		-0.296	AHR,BTG2,CDKN1A,CDKN1B,CDON,CNR1,DLGAP4,FOXO3,GAK,GATA2,GDNF,GNG5,HES1,KLF4,LIMS2,LNX2,MYC,NR4A1,RAPGEF1,SOX11,TNF	21
	Cellular Development,Cellular Growth and Proliferation,Hematological System Development and Function,Hematopoiesis	Proliferation of hematopoietic progenitor cells	2.38e-06		-0.301	AXIN1,BCL2L1,BTG1,CDKN1A,CDKN1B,CXCL2,DNAJA3,EFNB1,EGR3,FOXO3,GATA2,GATA3,HOXA5,KLF2,KLF4,MYC,MYH9,PTGS2,RARA,REL,S1PR1,SYK,TNF	23
	Cell-mediated Immune Response,Cellular Movement,Hematological System Development and Function,Immune Cell Trafficking	Cell movement of T lymphocytes	7.02e-07		-0.306	ACKR2,ANGPT2,Brd4,CCL3L3,CCL5,CD47,DBNL,DEK,Foxp1,GATA3,INSR,LIMK1,MYH9,NR3C1,NR4A1,P2RY10,PRF1,PTGS2,PTPRB,RGS16,S1PR1,STK4,TNF,TNFRSF21,Tnfsf9	25
	Cancer,Hematological Disease,Immunological Disease,Organismal Injury and Abnormalities	B cell cancer	3.47e-07		-0.323	ABCF1,ADRA1A,AHR,ATF3,AXIN1,BCL2L1,BTG1,BTG2,C1GALT1C1,CASP3,CCL5,CCNG2,CD36,CD47,CDC42EP3,CDKN1A,CDKN1B,CDON,CHIC1,CHST8,CLK1,CNR1,CREBBP,CSK,CWF19L2,CXCL2,CXCL6,CXXC1,DEK,DNAJB14,DUSP16,DUSP5,EP400,FAM167A,FOXO3,GGPS1,HAS1,HHEX,INTS3,KDM5C,KLF2,KSR1,LFNG,LNX2,LPIN2,LRIG3,MAP9,MBD1,MED12,MYC,NR3C1,NUP98,PCNP,PFKFB3,PFKFB4,PHC2,PNRC1,POLG,POLRMT,PPP6C,PRF1,PRKD2,PRX,PTGER2,PTGER4,PTGS2,PTPN23,PTP…	99
	Hematological System Development and Function,Immune Cell Trafficking,Inflammatory Response,Tissue Development	Accumulation of mononuclear leukocytes	1.03e-06		-0.33	ACKR2,AHR,CCL3L3,CCL5,CXCL2,EGR3,FOXO3,IER3,KLF2,NR3C1,RGS16,S1PR1,STK4,TLN1,TNF,TNFRSF21,Tnfsf9	17
	Cell Death and Survival,Organismal Injury and Abnormalities	Apoptosis of myeloma cell lines	2.72e-06		-0.341	BCL2L1,CASP3,CDKN1B,FOXO3,KLF10,KLF9,MYC,NR3C1,NR4A1,SP1,STK4,TNF	12
	Cancer,Organismal Injury and Abnormalities,Reproductive System Disease	Mammary tumor	3.27e-11		-0.343	ABCF1,ACIN1,ACTN4,ADAMTS1,ADAMTS15,AHDC1,AMOTL2,ANAPC13,ANGPT2,ANGPTL4,ANKRD11,ATF2,ATF3,ATP1A1,ATP7B,AXIN2,BAIAP2,BCAR3,BCL2L1,BTG2,C17orf80,C1GALT1C1,CAMTA2,CARM1,CASP3,CBX4,CCL5,CCN1,CCNG2,CCNL1,CCNT1,CDC42EP3,CDKN1A,CDKN1B,CDON,CLK1,CLK2,CPSF1,CREBBP,CTDP1,CXCL2,DACT1,DAPK3,DBNL,DDX27,DGKQ,DIP2C,DIXDC1,DLGAP4,DPYSL2,DUSP16,DYNC1H1,EGR3,EIF4A2,EP400,ERCC5,FGF7,FKBP5,FOSL2,FOXO3,FPGT,G0S2,GAK,G…	170
	Cellular Assembly and Organization,Tissue Development	Formation of filaments	4.97e-06		-0.346	ACTN1,BOP1,CD47,CDKN1A,CDKN1B,Clec2d (includes others),DCTN1,DPYSL2,FAM107A,FGF7,GDNF,GNG5,KIRREL1,KLF2,KSR1,LIMK1,MAP3K1,NR4A1,OGN,PITPNM1,PRKAA2,PTGER4,PTGS2,PTPRB,RAPGEF3,RGCC,RGS16,RND3,S1PR1,SORBS3,STK4,TNF	32
	Cell Death and Survival,Organismal Injury and Abnormalities	Apoptosis of bone cancer cell lines	4.69e-06		-0.348	ATF3,AXIN1,BCL2L1,CDKN1A,CDKN1B,DNAJA3,FOXO3,GPS2,KAT2B,MAP3K1,MYC,NR3C1,PPP1R13B,PRKAA2,RNF31,TNF	16
	Cancer,Organismal Injury and Abnormalities	Malignant solid tumor	1.6e-18		-0.353	ABCF1,ABTB2,ACIN1,ACKR2,ACTN1,ACTN4,ADAMTS1,ADAMTS15,ADAMTSL2,ADAP2,ADARB1,ADRA1A,AEN,AHDC1,AHR,AKAP7,ALG6,AMMECR1L,AMOTL2,ANAPC13,ANGPT2,ANGPTL4,ANKRD11,AP3D1,AP3M1,AP5B1,ARFGAP1,ARFGAP2,ARL4D,ARL5B,ASB3/GPR75-ASB3,ATF2,ATF3,ATP1A1,ATP7B,AXIN1,AXIN2,B4GALT4,BAIAP2,BANP,BCAP29,BCAR3,BCL2L1,BCLAF3,BET1,BNIP3L,BOP1,BTG1,BTG2,BTG3,BYSL,C17orf80,C1GALT1C1,C6orf62,C9orf40,C9orf72,CAMTA2,CAPN15,CARM1,C…	450
	Cancer,Organismal Injury and Abnormalities	Genitourinary tumor	8.78e-10		-0.353	ABCF1,ABTB2,ACIN1,ACTN1,ACTN4,ADAMTS1,ADAMTS15,ADAMTSL2,ADAP2,ADARB1,ADRA1A,AHDC1,AHR,AKAP7,AMOTL2,ANAPC13,ANGPT2,ANGPTL4,ANKRD11,AP3D1,AP5B1,ARFGAP1,ARFGAP2,ARL4D,ARL5B,ASB3/GPR75-ASB3,ATF2,ATF3,ATP1A1,ATP7B,AXIN1,AXIN2,B4GALT4,BAIAP2,BANP,BCAP29,BCAR3,BCL2L1,BCLAF3,BNIP3L,BTG2,BTG3,C17orf80,C1GALT1C1,C6orf62,CAMTA2,CAPN15,CARM1,CASKIN2,CASP3,CASS4,CBX4,CCL5,CCN1,CCNG2,CCNL1,CCNT1,CD36,CD47,CDC4…	339
	Cellular Assembly and Organization	Formation of cytoskeleton	2.26e-06		-0.354	ACTN1,BOP1,CD47,CDKN1A,CDKN1B,Clec2d (includes others),DBNL,DCTN1,DPYSL2,FAM107A,FGF7,GDNF,GNG5,KIRREL1,KLF2,KSR1,LIMK1,MAP3K1,MYC,NR4A1,PITPNM1,PTGER4,PTPRB,RAPGEF3,RGCC,RGS16,RND3,S1PR1,SORBS3,STK4,TNF	31
	Cancer,Organismal Injury and Abnormalities	Formation of solid tumor	7.62e-16		-0.372	ABCF1,ABTB2,ACIN1,ACKR2,ACTN1,ACTN4,ADAMTS1,ADAMTS15,ADAMTSL2,ADAP2,ADARB1,ADRA1A,AHDC1,AHR,AKAP7,ALG6,AMMECR1L,AMOTL2,ANGPT2,ANGPTL4,ANKRD11,AP3D1,AP5B1,ARFGAP1,ARFGAP2,ARL4D,ARL5B,ASB3/GPR75-ASB3,ATF2,ATF3,ATP1A1,ATP7B,AXIN1,AXIN2,B4GALT4,BAIAP2,BANP,BCAP29,BCAR3,BCL2L1,BCLAF3,BET1,BNIP3L,BTG2,BTG3,BYSL,C17orf80,C1GALT1C1,C6orf62,CAMTA2,CAPN15,CARM1,CASKIN2,CASP3,CASS4,CBX4,CCN1,CCNG2,CCNL1,CCN…	398
	Developmental Disorder,Organismal Injury and Abnormalities	Agenesis	3.19e-06		-0.378	AHR,CDKN1B,CREBBP,DACT1,EFNB1,FGF7,GATA6,GDNF,HES1,HHEX,HLX,KLF4,KLF7,MYC,PRF1,RARA,RASSF2,SPRY1,TNF	19
	Cell Death and Survival,Organismal Injury and Abnormalities	Necrosis of epithelial tissue	4.35e-09		-0.383	ADAMTS1,AHR,ANGPT2,ANGPTL4,ATF2,ATF3,ATP7B,BCL2L1,BNIP3L,CASP3,CD36,CDKN1A,CDKN1B,CDON,DLST,EP400,FGF7,FOXO3,GATA3,GATA6,IER3,KLF10,KLF2,KLF4,KSR1,MAP3K1,MED12,MEOX2,MYC,NFKBIZ,NQO2,NR3C1,NR4A1,PRF1,PRKAA2,PTCH1,PTGS2,REL,RGS16,RND3,RNF216,RNF31,S1PR1,SELENOP,SEMA7A,STK4,SYVN1,TNF,TNFRSF19,TNFRSF21	50
	Cell Death and Survival	Apoptosis of skin	3.59e-06		-0.388	BCL2L1,CASP3,CDKN1A,KLF10,MYC,NQO2,NR3C1,PTGS2,RND3,RNF31,SIRT1,TNF	12
	Organismal Injury and Abnormalities	Soft tissue lesion	9.15e-16		-0.403	ABCF1,ACIN1,ACKR2,ACTN1,ACTN4,ADAMTS1,ADAMTS15,ADAMTSL2,ADRA1A,AHDC1,AHR,AMMECR1L,AMOTL2,ANGPT2,ANKRD11,AP3D1,AP5B1,ARFGAP1,ARFGAP2,ARL5B,ASB3/GPR75-ASB3,ATF2,ATP1A1,ATP7B,AXIN1,AXIN2,B4GALT4,BAIAP2,BANP,BCAR3,BCL2L1,BCLAF3,BET1,BNIP3L,BTG2,BTG3,C1GALT1C1,CAMTA2,CAPN15,CARM1,CASKIN2,CASP3,CASS4,CBX4,CCNG2,CCNL1,CCNT1,CDC42EP3,CDC42EP4,CDKN1A,CDKN1B,CDON,CEPT1,CHERP,CHIC1,CHST8,CISH,CNKSR3,CNR1,CO…	304
	Cellular Growth and Proliferation,Tissue Development	Proliferation of neural cells	1.74e-10		-0.426	AHR,AXIN1,BAIAP2,BTG1,BTG2,BTG3,CCL5,CCN1,CD47,CDKN1A,CDKN1B,CDON,CNR1,CSNK1D,CXCL2,DIXDC1,DLGAP4,DNAJA3,DPYSL2,EFNB1,EGR3,FAM107A,FGF7,FKBP5,FOXO3,GAK,GATA2,GATA3,GDNF,GNG5,GPM6A,HES1,KLF4,KLF7,LIMK1,LIMS2,LNX2,MYC,MYH9,MYLIP,POLR3E,PRKAA2,PTCH1,RAPGEF1,REL,RND3,S1PR1,SEMA7A,SH2D3C,SIRT1,SOX11,SYK,TGIF1,TNF,TNFRSF19,ZNF335	56
	Cellular Movement,Immune Cell Trafficking	Cell movement of lymphatic system cells	1.13e-08		-0.434	ACKR2,ACTN4,ANGPT2,Brd4,CCL3L3,CCL5,CCNT1,CD47,CXCL6,DBNL,DEK,DPYSL2,Foxp1,GATA3,INSR,KLF2,LIMK1,MYH9,NQO2,NR3C1,NR4A1,P2RY10,PRF1,PTGS2,PTPRB,RAPGEF1,RGS16,S1PR1,SCRIB,SERP1,SH2D3C,SOX11,STK4,SYK,TLN1,TNF,TNFRSF21,Tnfsf9,ZC3H12A	39
	Cancer,Organismal Injury and Abnormalities	Adenocarcinoma	1.5e-15		-0.448	ABCF1,ABTB2,ACIN1,ACKR2,ACTN1,ACTN4,ADAMTS1,ADAMTS15,ADAMTSL2,ADAP2,ADARB1,ADRA1A,AEN,AHDC1,AHR,AKAP7,ALG6,AMMECR1L,AMOTL2,ANGPT2,ANGPTL4,ANKRD11,AP3D1,AP3M1,AP5B1,ARFGAP1,ARFGAP2,ARL4D,ARL5B,ASB3/GPR75-ASB3,ATF2,ATF3,ATP1A1,ATP7B,AXIN1,AXIN2,B4GALT4,BAIAP2,BANP,BCAP29,BCAR3,BCL2L1,BCLAF3,BNIP3L,BTG3,BYSL,C17orf80,C1GALT1C1,C6orf62,C9orf72,CAMTA2,CAPN15,CARM1,CASKIN2,CASP3,CASS4,CBX4,CCL3L3,CCL5,…	403
	Cellular Assembly and Organization,Tissue Development	Fibrogenesis	1.64e-06		-0.453	ACTN1,BOP1,CD47,CDKN1A,CDKN1B,Clec2d (includes others),CNR1,DCTN1,DPYSL2,FAM107A,FGF7,GDNF,GNG5,KIRREL1,KLF2,KSR1,LIMK1,MAP3K1,NR4A1,OGN,PITPNM1,PRKAA2,PTGER4,PTGS2,PTPRB,RAPGEF3,REL,RGCC,RGS16,RND3,S1PR1,SORBS3,STK4,SYVN1,TNF,WDR1	36
	Metabolic Disease,Organismal Injury and Abnormalities	Glucose metabolism disorder	1.23e-06		-0.466	ABCF1,ADAMTS1,ADARB1,ADRA1A,AHDC1,ANAPC13,ANGPT2,ANGPTL4,ATF3,ATP1A1,ATP7B,BCL2L1,BTG1,BTG2,CASP3,CCL3L3,CCL5,CCN1,CD36,CDC42EP3,CDKN1A,CDKN1B,CEPT1,CISH,CNR1,CREBBP,CREBRF,CRTC2,CSNK1D,CTSO,DIP2C,DNAJA3,EIF4A2,EIF4ENIF1,FKBP5,FOSL2,FOXO3,Foxp1,G0S2,GATA2,GATA6,GGPS1,GLP1R,GLUL,HCAR2,HES1,HHEX,HSF2,HSPA1A/HSPA1B,IER3IP1,INSR,KCNJ2,KLF10,KLF15,KLF4,LPAR3,LPIN2,MRPL53,MYC,MYH9,NMT2,NR3C1,NR4A1,NR4A…	94
	Tissue Development	Accumulation of cells	1.57e-08		-0.483	ACKR2,AHR,ANGPT2,CCL3L3,CCL5,CCN1,CDKN1A,CNR1,CXCL2,EGR3,FEM1A,FOXO3,GATA2,GATA3,GATAD2A,IER3,KLF2,KLF4,MYC,NR3C1,NR4A1,PTGS2,RGS16,S1PR1,SEMA7A,SIRT1,STK4,TLN1,TNF,TNFRSF21,Tnfsf9,ZC3H12A	32
	Cancer,Organismal Injury and Abnormalities	Pelvic tumor	4.98e-09		-0.492	ABCF1,ABTB2,ACIN1,ACTN1,ACTN4,ADAMTS1,ADAMTS15,ADAMTSL2,ADAP2,ADARB1,ADRA1A,AHDC1,AHR,AKAP7,ANGPT2,ANGPTL4,ANKRD11,AP3D1,AP5B1,ARFGAP1,ARFGAP2,ARL4D,ASB3/GPR75-ASB3,ATF3,ATP1A1,ATP7B,AXIN1,AXIN2,B4GALT4,BAIAP2,BANP,BCAP29,BCAR3,BCL2L1,BCLAF3,BNIP3L,BTG3,C17orf80,CAMTA2,CAPN15,CARM1,CASKIN2,CASP3,CASS4,CBX4,CCL5,CCN1,CCNT1,CD36,CD47,CDC42EP3,CDC42EP4,CDKN1A,CDKN1B,CDON,CHERP,CHIC1,CHST8,CLK1,CLK2,…	303
	Cell Death and Survival,Organismal Injury and Abnormalities	Cell death of pheochromocytoma cell lines	3.46e-06		-0.498	ANGPT2,ATF3,BCL2L1,BNIP3L,BTG2,CASP3,HERPUD1,MAP3K1,MYC,PTGS2,SIRT1,SP1,TNF	13
	Cellular Development,Cellular Growth and Proliferation,Hematological System Development and Function,Hematopoiesis	Proliferation of erythroid precursor cells	8.16e-06		-0.518	BCL2L1,BTG1,CDKN1A,CDKN1B,HOXA5,MYC,MYH9,TNF	8
	Cellular Development,Cellular Growth and Proliferation,Nervous System Development and Function,Tissue Development	Proliferation of neuronal cells	7.74e-07		-0.52	BAIAP2,BTG2,BTG3,CD47,CDKN1A,CDON,CNR1,CSNK1D,DIXDC1,DNAJA3,DPYSL2,EFNB1,EGR3,FAM107A,FGF7,FKBP5,GATA2,GATA3,GDNF,GPM6A,HES1,KLF4,KLF7,LIMK1,MYC,MYH9,MYLIP,POLR3E,PTCH1,RAPGEF1,REL,SEMA7A,SH2D3C,SIRT1,SYK,TGIF1,TNF,TNFRSF19,ZNF335	39
	Cancer,Hematological Disease,Organismal Injury and Abnormalities	Myeloid or lymphoid neoplasm	1.87e-10		-0.528	ABCF1,ADAMTS15,ADRA1A,AEN,AHR,ANGPT2,ANGPTL4,ANKRD11,ASB3/GPR75-ASB3,ATF2,ATF3,AXIN1,AXIN2,BCAR3,BCL2L1,BNIP3L,BTG1,BTG2,C17orf80,C1GALT1C1,C9orf72,CAMTA2,CASP3,CBX4,CCL5,CCN1,CCNG2,CCNL1,CCNT1,CD36,CD47,CDC42EP3,CDKN1A,CDKN1B,CDON,CHIC1,CHST8,CLK1,CNR1,CPSF1,CREBBP,CSK,CWF19L2,CXCL2,CXCL6,CXXC1,CYB561,DAPK3,DCTN1,DEK,DIP2C,DNAJB14,DUSP16,DUSP5,DYNC1H1,E4F1,EP400,FAM167A,FEM1A,FGF7,FOSL2,FOXO3,GA…	195
	Hematological System Development and Function,Immune Cell Trafficking,Inflammatory Response,Tissue Development	Accumulation of lymphocytes	1.09e-06		-0.545	ACKR2,AHR,CCL3L3,CCL5,EGR3,FOXO3,IER3,KLF2,NR3C1,RGS16,S1PR1,STK4,TLN1,TNF,TNFRSF21,Tnfsf9	16
	Cancer,Organismal Injury and Abnormalities	Nonhematologic malignant neoplasm	4.2e-19		-0.546	ABCF1,ABTB2,ACIN1,ACKR2,ACTN1,ACTN4,ADAMTS1,ADAMTS15,ADAMTSL2,ADAP2,ADARB1,ADRA1A,AEN,AHDC1,AHR,AKAP7,ALG6,AMMECR1L,AMOTL2,ANGPT2,ANGPTL4,ANKRD11,AP3D1,AP3M1,AP5B1,ARFGAP1,ARFGAP2,ARL4D,ARL5B,ASB3/GPR75-ASB3,ATF2,ATF3,ATP1A1,ATP7B,AXIN1,AXIN2,B4GALT4,BAIAP2,BANP,BCAP29,BCAR3,BCL2L1,BCLAF3,BET1,BNIP3L,BOP1,BTG1,BTG2,BTG3,BYSL,C17orf80,C1GALT1C1,C6orf62,C9orf40,C9orf72,CAMTA2,CAPN15,CARM1,CASKIN2,C…	445
	Cancer,Organismal Injury and Abnormalities	Tumorigenesis of epithelial neoplasm	3.19e-13		-0.568	ABCF1,ABTB2,ACIN1,ACKR2,ACTN1,ACTN4,ADAMTS1,ADAMTS15,ADAMTSL2,ADAP2,ADARB1,ADRA1A,AHDC1,AHR,AKAP7,ALG6,AMMECR1L,AMOTL2,ANGPT2,ANGPTL4,ANKRD11,AP3D1,ARFGAP1,ARFGAP2,ASB3/GPR75-ASB3,ATF2,ATF3,ATP1A1,ATP7B,AXIN1,AXIN2,B4GALT4,BAIAP2,BANP,BCAP29,BCAR3,BCL2L1,BCLAF3,BNIP3L,BTG3,BYSL,C17orf80,C6orf62,CAMTA2,CAPN15,CARM1,CASKIN2,CASP3,CASS4,CBX4,CCN1,CCNG2,CCNT1,CD36,CD47,CDC42EP3,CDKN1A,CDKN1B,CDON,CEP…	350
	Post-Translational Modification	Phosphorylation of protein	7.89e-07		-0.587	AHR,ATF2,AXIN1,AXIN2,Brd4,C9orf72,CCL5,CCN1,CCNT1,CD36,CD47,CDKN1A,CDKN1B,CDON,CLK1,CLK2,CORO1C,CSK,CSNK1D,DAPK3,FGF7,INSR,KIRREL1,LIMK1,MAP3K1,MAP3K6,MARK4,NHLRC1,PLK2,PRKAA2,PRKD2,PRR5L,PTGER4,RAD17,RAPGEF3,RARA,SEMA7A,Sik1,SIRT1,SNRK,STK17B,STK4,SYK,TNF,ZC3H12A	45
	Cellular Assembly and Organization,Cellular Function and Maintenance,Tissue Development	Formation of actin filaments	3.35e-06		-0.591	ACTN1,BOP1,CD47,CDKN1A,Clec2d (includes others),FAM107A,FGF7,GDNF,GNG5,KIRREL1,KLF2,KSR1,LIMK1,MAP3K1,NR4A1,PITPNM1,PTGER4,PTPRB,RAPGEF3,RGCC,RGS16,RND3,S1PR1,SORBS3,STK4,TNF	26
	Cancer,Hematological Disease,Immunological Disease,Organismal Injury and Abnormalities	B-cell neoplasm	1.33e-06		-0.594	ABCF1,ADRA1A,AHR,ATF3,AXIN1,BCL2L1,BTG1,BTG2,C1GALT1C1,CASP3,CCL5,CCNG2,CD36,CD47,CDC42EP3,CDKN1A,CDKN1B,CDON,CHIC1,CHST8,CLK1,CNR1,CREBBP,CSK,CWF19L2,CXCL2,CXCL6,CXXC1,DEK,DNAJB14,DUSP16,DUSP5,EP400,FAM167A,FOXO3,GATA5,GGPS1,HAS1,HHEX,INTS3,KCNK13,KDM5C,KLF2,KSR1,LFNG,LNX2,LPIN2,LRIG3,MAP9,MBD1,MED12,MYC,NR3C1,NUP98,PCNP,PFKFB3,PFKFB4,PHC2,PNRC1,POLG,POLRMT,PPP6C,PRF1,PRKD2,PRX,PTGER2,PTGER4,PTG…	103
	Cellular Movement,Hematological System Development and Function,Immune Cell Trafficking	Lymphocyte migration	1.87e-07		-0.596	ACKR2,ANGPT2,Brd4,CCL3L3,CCL5,CD47,CXCL6,DBNL,DEK,DPYSL2,Foxp1,GATA3,INSR,KLF2,LIMK1,MYH9,NR3C1,NR4A1,P2RY10,PRF1,PTGS2,PTPRB,RAPGEF1,RGS16,S1PR1,SCRIB,SERP1,SH2D3C,STK4,TLN1,TNF,TNFRSF21,Tnfsf9	33
	Cellular Development,Cellular Growth and Proliferation	Cell proliferation of breast cancer cell lines	8.51e-07		-0.608	ACTN4,ADAMTS1,AHR,AMOTL2,AXIN2,BCAR3,BCL2L1,BTG2,CASP3,CCN1,CDKN1A,CDKN1B,DUSP5,FGF7,G0S2,GATA3,GPS2,HES1,HIC1,IER3,INSR,KLF4,MARK4,MYC,NELFA,NR3C1,PELP1,PFKFB4,PTGER2,RARA,RGS16,RNF31,RNF40,RRAD,SEMA7A,SH2D3C,SIRT1,SP1,SYK,TNF,TOB1,UBA1	42
	Cellular Growth and Proliferation	Outgrowth of cells	9.74e-06		-0.611	BAIAP2,BTG3,CCN1,CD47,CDKN1A,CNR1,CSNK1D,CXCL2,DNAJA3,DPYSL2,EFNB1,EGR3,FAM107A,FGF7,FKBP5,GATA3,GDNF,GPM6A,KLF7,LIMK1,MYH9,MYLIP,PLK2,POLR3E,RAPGEF1,REL,SEMA7A,SH2D3C,TNF,TNFRSF19	30
	Cell Cycle	G1 phase	3.73e-08		-0.612	ACIN1,ADRA1A,AHR,ATF3,BCL2L1,BOP1,BTG2,BTG3,CARM1,CCN1,CCNG2,CDKN1A,CDKN1B,E4F1,EP400,FOXO3,GATA3,GATA5,GPS2,HES1,INSR,KLF10,KLF4,KLF6,MYC,NR3C1,NUCKS1,PFKFB3,PLK2,PLSCR1,PTCH1,RAD17,REL,RGCC,SIRT1,SP1,TNF,TOB1	38
	Tissue Morphology	Quantity of cells	2.08e-06		-0.615	ACKR2,ACTN4,ADAMTS1,AHR,ANGPT2,ATF2,ATF3,BCAR3,BCL2L1,BNIP3L,Brd4,C1GALT1C1,CARM1,CASP3,CCL3L3,CCL5,CD36,CD47,CDKN1A,CDKN1B,CISH,Clec2d (includes others),CREB3L4,CREBBP,CSK,CXCL2,CXCL6,DEK,DNAJA3,DUSP5,EFNB1,EGR3,FGF7,FOSL2,FOXO3,Foxp1,GATA2,GATA3,GATA5,GATA6,GDNF,GLP1R,GPS2,HCAR2,HES1,HEY1,HIC1,HOXA5,HSF2,INSR,KLF10,KLF13,KLF2,KLF4,KLF6,KLF7,KSR1,LFNG,MYC,MYH9,NMT2,NQO2,NR3C1,NR4A1,NR4A2,NRP2,NU…	104
	Organ Development,Reproductive System Development and Function	Growth of ovary	2.33e-06		-0.62	AHR,CDKN1A,CDKN1B,FGF7,FOXO3,MYC,NR4A1,PTGER2,PTGS2,TNF	10
	Cancer,Organismal Injury and Abnormalities	Abdominal adenocarcinoma	4.04e-15		-0.631	ABCF1,ABTB2,ACIN1,ACKR2,ACTN1,ACTN4,ADAMTS1,ADAMTS15,ADAMTSL2,ADAP2,ADARB1,ADRA1A,AEN,AHDC1,AHR,AKAP7,ALG6,AMMECR1L,AMOTL2,ANGPT2,ANGPTL4,ANKRD11,AP3D1,AP3M1,AP5B1,ARFGAP1,ARFGAP2,ARL4D,ARL5B,ASB3/GPR75-ASB3,ATF2,ATP1A1,ATP7B,AXIN1,AXIN2,B4GALT4,BAIAP2,BANP,BCAP29,BCAR3,BCL2L1,BCLAF3,BNIP3L,BTG3,BYSL,C17orf80,C6orf62,C9orf72,CAMTA2,CAPN15,CARM1,CASKIN2,CASP3,CASS4,CBX4,CCL3L3,CCL5,CCN1,CCNG2,CCNL…	396
	Endocrine System Disorders,Gastrointestinal Disease,Organismal Injury and Abnormalities	Pancreatic lesion	1.02e-06		-0.631	ABTB2,ACIN1,ACTN4,ADAMTS1,ADAMTS15,ADARB1,AHR,AKAP7,ANGPT2,ANKRD11,AP3D1,ASB3/GPR75-ASB3,ATF2,ATP7B,AXIN2,BAIAP2,BCAR3,BCL2L1,CAMTA2,CASKIN2,CASP3,CASS4,CCL3L3,CCL5,CCN1,CCNL1,CDKN1A,CDKN1B,CDON,CHERP,CLK1,CNKSR3,CPSF1,CREB3L4,CREBBP,CREBRF,CXCL2,CXCL6,DCTN1,DIP2C,DOLK,DRAM2,DUSP16,E4F1,EP400,FBXO32,FBXO33,FEM1A,FOSL2,GAK,GATA3,GATA5,GATA6,GATAD2A,GEMIN5,GINM1,GPS2,GRAMD2A,GTF3C3,HAS1,HIRA,HOXA5,…	133
	Cancer,Endocrine System Disorders,Gastrointestinal Disease,Organismal Injury and Abnormalities	Pancreatic tumor	1.13e-06		-0.631	ABTB2,ACIN1,ACTN4,ADAMTS1,ADAMTS15,ADARB1,AHR,AKAP7,ANGPT2,ANKRD11,AP3D1,ASB3/GPR75-ASB3,ATF2,ATP7B,AXIN2,BAIAP2,BCAR3,BCL2L1,CAMTA2,CASKIN2,CASP3,CASS4,CCL3L3,CCL5,CCN1,CCNL1,CDKN1A,CDKN1B,CDON,CHERP,CLK1,CNKSR3,CPSF1,CREB3L4,CREBBP,CREBRF,CXCL2,CXCL6,DCTN1,DIP2C,DOLK,DRAM2,DUSP16,E4F1,EP400,FBXO32,FBXO33,FEM1A,FOSL2,GAK,GATA3,GATA5,GATA6,GATAD2A,GEMIN5,GINM1,GPS2,GRAMD2A,GTF3C3,HAS1,HIRA,HOXA5,…	132
	Cell Death and Survival,Organismal Injury and Abnormalities	Apoptosis of epithelial cells	2.99e-06		-0.641	AHR,ATF2,ATF3,BCL2L1,CASP3,CD36,CDKN1A,CDKN1B,EP400,KLF10,KSR1,MYC,NFKBIZ,NQO2,NR3C1,NR4A1,PRF1,PTGS2,REL,RND3,RNF31,S1PR1,SELENOP,SEMA7A,STK4,TNF	26
	Organismal Injury and Abnormalities	Benign lesion	6.11e-10		-0.65	ADARB1,ADRA1A,AHR,ALG6,ANGPT2,ARL4D,ATF2,ATP1A1,AXIN1,AXIN2,BCL2L1,BYSL,CCL3L3,CCN1,CDC42EP3,CDKN1A,CDKN1B,CHST8,CNR1,DACT1,DLGAP4,DUSP5,ERCC5,FGF7,FOXO3,GGPS1,GLUL,GPM6A,HES1,HNMT,HOXA5,INSR,KLF10,KLF2,KLF4,KLF7,KSR1,LIMK1,MAP3K1,MED12,MYC,MYH9,NFKBIZ,NR3C1,NR4A1,NR4A2,NRP2,OGN,PELP1,PHLDA1,PPP6C,PTCH1,PTCH2,PTGER2,PTGER4,PTGS2,RABGAP1L,RAPGEF3,RARA,RIN3,RND3,S1PR1,SAFB,SCRIB,SELENOP,SF3A1,SH2D3…	75
	Organismal Injury and Abnormalities	Non-malignant disorder	7.49e-10		-0.673	ADARB1,ADRA1A,AHR,ALG6,ANGPT2,ARL4D,ARL5B,ATF2,ATP1A1,ATP7B,AXIN1,AXIN2,BCAR3,BCL2L1,BTG2,BYSL,CASP3,CCL3L3,CCL5,CCN1,CDC42EP3,CDKN1A,CDKN1B,CDON,CNR1,CREBBP,CTDP1,CXCL6,DACT1,DLGAP4,DUSP5,DYNC1H1,EFNB1,ERCC5,FGF7,FOSL2,FOXO3,G0S2,GATA3,GGPS1,GLP1R,GLUL,GPM6A,HES1,HNMT,HOXA5,HSPA1A/HSPA1B,IER3,IER3IP1,INSIG1,INSR,KCNJ2,KLF10,KLF2,KLF4,KLF7,KSR1,LFNG,LIMK1,MAP3K1,MARF1,MBD1,MED12,MYC,MYH9,MYLIP,NF…	111
	Cell Cycle	Mitosis	4.66e-06		-0.674	AHR,BTG3,CCN1,CCNL1,CDKN1A,CDKN1B,CSK,CSNK1D,DAPK3,DYNC1H1,E4F1,EP400,FGF7,FOXO3,GAK,HSPA1A/HSPA1B,INSR,MAP9,MYBBP1A,MYC,MYH14,NR3C1,NUDCD3,NUP98,PHF12,PLK2,PTCH1,PTGS2,RGCC,S1PR1,SCRIB,Sik1,SIRT1,STAG1,SYK,TNF	36
	Infectious Diseases,Organismal Injury and Abnormalities	Viral Infection	5.49e-11		-0.705	ABCF1,ACTN1,ADARB1,ADRA1A,AHR,ANKRD11,AP3D1,AP3M1,ARHGAP23,ARL5B,ATP1A1,BAIAP2,BCL2L1,BET1,BTG2,CASP3,CCL3L3,CCL5,CCNT1,CD36,CDC42EP3,CDKN1A,CDKN1B,CLK1,CREBBP,CRTC2,CTDP1,CXCL2,CXCL6,CYB561,CYTH1,DCTN1,DEK,DLGAP4,DLST,DNAJA3,DTX2,DUSP16,DYNC1H1,EGR3,EHF,EIF4A2,ERCC5,FGF7,FKBP5,FOSL2,FOXO3,GAK,GATAD2A,GGPS1,GLP1R,GLUL,GTF2A1,HERPUD1,HES1,HIRA,HLX,HSPA1A/HSPA1B,IER3,INSIG1,INSR,KCNJ2,KLF15,KLF2,KL…	115
	Cellular Development,Cellular Growth and Proliferation,Nervous System Development and Function,Tissue Development	Growth of neurites	3.65e-06		-0.706	BAIAP2,BTG3,CD47,CDKN1A,CNR1,CSNK1D,DIXDC1,DNAJA3,DPYSL2,EFNB1,EGR3,FAM107A,FGF7,FKBP5,GATA3,GDNF,GPM6A,KLF4,KLF7,LIMK1,MYC,MYH9,MYLIP,POLR3E,RAPGEF1,REL,SEMA7A,SH2D3C,SIRT1,SYK,TGIF1,TNF,TNFRSF19	33
	Developmental Disorder,Organismal Injury and Abnormalities	Aplasia	2.47e-06		-0.707	ADRA1A,AHR,CDKN1B,CREBBP,DACT1,EFNB1,FGF7,GATA6,GDNF,HES1,HHEX,HLX,KLF4,KLF7,MYC,PRF1,RARA,RASSF2,SPRY1,TNF	20
	Cancer,Gastrointestinal Disease,Organismal Injury and Abnormalities	Development of digestive organ tumor	2.15e-12		-0.722	ABCF1,ACIN1,ACKR2,ACTN1,ACTN4,ADAMTS1,ADAMTS15,ADAMTSL2,ADAP2,ADARB1,ADRA1A,AHDC1,AHR,AKAP7,AMMECR1L,AMOTL2,ANGPT2,ANGPTL4,ANKRD11,AP3D1,ARFGAP1,ARFGAP2,ASB3/GPR75-ASB3,ATP7B,AXIN1,AXIN2,BANP,BCAP29,BCAR3,BCL2L1,BTG3,C17orf80,CAMTA2,CAPN15,CARM1,CASKIN2,CASP3,CASS4,CBX4,CCN1,CCNG2,CCNT1,CD47,CDC42EP3,CDKN1A,CDKN1B,CDON,CEPT1,CHERP,CHST8,CLK2,CNKSR3,CNR1,COQ10B,CORO1C,CPSF1,CREB3L4,CREBBP,CRTC2,CS…	276
	Cancer,Organismal Injury and Abnormalities	Abdominal carcinoma	7.34e-16		-0.725	ABCF1,ABTB2,ACIN1,ACKR2,ACTN1,ACTN4,ADAMTS1,ADAMTS15,ADAMTSL2,ADAP2,ADARB1,ADRA1A,AEN,AHDC1,AHR,AKAP7,ALG6,AMMECR1L,AMOTL2,ANGPT2,ANGPTL4,ANKRD11,AP3D1,AP3M1,AP5B1,ARFGAP1,ARFGAP2,ARL4D,ARL5B,ASB3/GPR75-ASB3,ATF2,ATF3,ATP1A1,ATP7B,AXIN1,AXIN2,B4GALT4,BAIAP2,BANP,BCAP29,BCAR3,BCL2L1,BCLAF3,BNIP3L,BOP1,BTG3,BYSL,C17orf80,C6orf62,C9orf72,CAMTA2,CAPN15,CARM1,CASKIN2,CASP3,CASS4,CBX4,CCL3L3,CCL5,CCN1,…	413
	Cellular Growth and Proliferation,Tissue Development	Proliferation of epithelial cells	9.37e-10		-0.725	AHR,ATF2,ATF3,BCL2L1,CASP3,CCL5,CCN1,CCNG2,CDKN1A,CDKN1B,CNR1,CREBBP,FGF7,Foxp1,GATA2,GATA3,GLUL,HES1,HEY1,HLX,HOXA5,INSR,KLF10,KLF2,KLF4,KLF9,LIMS2,MYC,NFKBIZ,NR3C1,NR4A1,OSR1,PELP1,PRKD2,PTCH1,PTGER2,PTGS2,RARA,REL,RNF144B,SOX11,STK4,TNF,TOB1,YOD1,ZFP36L1	46
	Cancer,Neurological Disease,Organismal Injury and Abnormalities	Central nervous system cancer	5.92e-17		-0.759	ABCF1,ACIN1,ACKR2,ACTN1,ACTN4,ADAMTS1,ADAMTS15,ADAMTSL2,ADARB1,ADRA1A,AHDC1,AHR,AMMECR1L,AMOTL2,ANGPT2,ANKRD11,AP3D1,AP5B1,ARFGAP1,ARFGAP2,ARL5B,ASB3/GPR75-ASB3,ATF2,ATP1A1,ATP7B,AXIN1,AXIN2,B4GALT4,BAIAP2,BANP,BCL2L1,BCLAF3,BET1,BNIP3L,BTG2,BTG3,C17orf80,C1GALT1C1,CAMTA2,CAPN15,CARM1,CASKIN2,CASP3,CASS4,CBX4,CCNG2,CCNL1,CCNT1,CD36,CD47,CDC42EP3,CDC42EP4,CDKN1A,CDKN1B,CDON,CEPT1,CHERP,CHIC1,CHST8…	298
	Cancer,Neurological Disease,Organismal Injury and Abnormalities	Brain tumor	1.39e-16		-0.759	ABCF1,ACIN1,ACKR2,ACTN1,ACTN4,ADAMTS1,ADAMTS15,ADAMTSL2,ADRA1A,AHDC1,AHR,AMMECR1L,AMOTL2,ANGPT2,ANKRD11,AP3D1,AP5B1,ARFGAP1,ARFGAP2,ARL5B,ASB3/GPR75-ASB3,ATF2,ATP1A1,ATP7B,AXIN1,AXIN2,B4GALT4,BAIAP2,BANP,BCL2L1,BCLAF3,BET1,BNIP3L,BTG2,BTG3,C1GALT1C1,CAMTA2,CAPN15,CARM1,CASKIN2,CASP3,CASS4,CBX4,CCNG2,CCNL1,CCNT1,CDC42EP3,CDC42EP4,CDKN1B,CDON,CEPT1,CHERP,CHIC1,CHST8,CISH,CNKSR3,COQ10B,CPSF1,CREBBP,…	292
	Cellular Movement,Hematological System Development and Function,Immune Cell Trafficking	Cell movement of lymphocytes	5.4e-08		-0.765	ACKR2,ACTN4,ANGPT2,Brd4,CCL3L3,CCL5,CCNT1,CD47,CXCL6,DBNL,DEK,DPYSL2,Foxp1,GATA3,INSR,KLF2,LIMK1,MYH9,NQO2,NR3C1,NR4A1,P2RY10,PRF1,PTGS2,PTPRB,RAPGEF1,RGS16,S1PR1,SCRIB,SERP1,SH2D3C,STK4,TLN1,TNF,TNFRSF21,Tnfsf9,ZC3H12A	37
	Cancer,Gastrointestinal Disease,Organismal Injury and Abnormalities	Colorectal tumor	4.14e-10		-0.766	ACIN1,ACKR2,ACTN1,ADAMTS1,ADAMTS15,ADAP2,ADARB1,ADRA1A,AHDC1,AHR,AKAP7,AMOTL2,ANGPT2,ANGPTL4,ANKRD11,AP3D1,ARFGAP2,ATF3,ATP7B,AXIN1,AXIN2,BANP,BCAP29,BCL2L1,BTG3,BYSL,CAMTA2,CAPN15,CARM1,CASKIN2,CASP3,CBX4,CCL5,CCNG2,CCNT1,CD36,CDC42EP3,CDKN1A,CDKN1B,CDON,CEPT1,CHERP,CHST8,CLK2,CNKSR3,CNR1,COQ10B,CORO1C,CPSF1,CREB3L4,CREBBP,CRTC2,CSNK1D,CSRNP2,CTTNBP2NL,DACT1,DCTN1,DDX27,DDX54,DIP2C,DLGAP4,DLST,D…	245
	Cellular Movement	Cell movement of breast cancer cell lines	5.28e-06		-0.772	ACTN1,ACTN4,AHR,ANGPT2,ATF3,AXIN2,BANP,BCAR3,BCL2L1,CCL5,CDKN1B,DNAJA3,DUSP5,FGF7,FOXO3,GATA3,GEMIN5,HHEX,HIC1,KLF4,LIMK1,MARK4,MYC,MYH9,PIK3R5,PRKD2,PTPN23,SP1,SYK,TLN1,TNF,TNFRSF21	32
	Cancer,Organismal Injury and Abnormalities	Development of benign tumor	1.13e-06		-0.774	AHR,ALG6,ANGPT2,ATF2,ATP1A1,AXIN1,AXIN2,BCL2L1,BYSL,CDKN1A,CDKN1B,CNR1,DACT1,DUSP5,ERCC5,FGF7,FOXO3,GGPS1,GLUL,HES1,INSR,KLF10,KLF2,KLF4,MAP3K1,MED12,MYC,MYH9,NR3C1,NRP2,PHLDA1,PPP6C,PTCH1,PTCH2,PTGS2,RABGAP1L,RARA,RND3,SCRIB,SELENOP,SOX11,SPRY4,TET1	43
	Cancer,Gastrointestinal Disease,Organismal Injury and Abnormalities	Pancreatobiliary tumor	1.37e-07		-0.785	ABTB2,ACIN1,ACTN4,ADAMTS1,ADAMTS15,ADARB1,AHR,AKAP7,ANGPT2,ANKRD11,AP3D1,ASB3/GPR75-ASB3,ATF2,ATP7B,AXIN1,AXIN2,BAIAP2,BCAR3,BCL2L1,CAMTA2,CARM1,CASKIN2,CASP3,CASS4,CCL3L3,CCL5,CCN1,CCNL1,CDKN1A,CDKN1B,CDON,CHERP,CHST8,CLK1,CLK2,CNKSR3,CPSF1,CREB3L4,CREBBP,CREBRF,CWF19L2,CXCL2,CXCL6,DCTN1,DDX54,DEK,DIP2C,DLST,DOLK,DRAM2,DTX2,DUSP16,E4F1,EP400,FBXO32,FBXO33,FEM1A,FOSL2,GAK,GATA3,GATA5,GATA6,GATAD2…	157
	Cancer,Gastrointestinal Disease,Organismal Injury and Abnormalities	Pancreaticobiliary neoplasm	1.37e-07		-0.785	ABTB2,ACIN1,ACTN4,ADAMTS1,ADAMTS15,ADARB1,AHR,AKAP7,ANGPT2,ANKRD11,AP3D1,ASB3/GPR75-ASB3,ATF2,ATP7B,AXIN1,AXIN2,BAIAP2,BCAR3,BCL2L1,CAMTA2,CARM1,CASKIN2,CASP3,CASS4,CCL3L3,CCL5,CCN1,CCNL1,CDKN1A,CDKN1B,CDON,CHERP,CHST8,CLK1,CLK2,CNKSR3,CPSF1,CREB3L4,CREBBP,CREBRF,CWF19L2,CXCL2,CXCL6,DCTN1,DDX54,DEK,DIP2C,DLST,DOLK,DRAM2,DTX2,DUSP16,E4F1,EP400,FBXO32,FBXO33,FEM1A,FOSL2,GAK,GATA3,GATA5,GATA6,GATAD2…	157
	Cancer,Organismal Injury and Abnormalities	Carcinoma	3.03e-17		-0.8	ABCF1,ABTB2,ACIN1,ACKR2,ACTN1,ACTN4,ADAMTS1,ADAMTS15,ADAMTSL2,ADAP2,ADARB1,ADRA1A,AEN,AHDC1,AHR,AKAP7,ALG6,AMMECR1L,AMOTL2,ANGPT2,ANGPTL4,ANKRD11,AP3D1,AP3M1,AP5B1,ARFGAP1,ARFGAP2,ARL4D,ARL5B,ASB3/GPR75-ASB3,ATF2,ATF3,ATP1A1,ATP7B,AXIN1,AXIN2,B4GALT4,BAIAP2,BANP,BCAP29,BCAR3,BCL2L1,BCLAF3,BNIP3L,BOP1,BTG1,BTG2,BTG3,BYSL,C17orf80,C1GALT1C1,C6orf62,C9orf40,C9orf72,CAMTA2,CAPN15,CARM1,CASKIN2,CASP3,…	438
	Cell Death and Survival,Organismal Injury and Abnormalities	Neuronal cell death	5.19e-06		-0.8	ADARB1,Agtr1b,ATF2,ATF3,BCL2L1,BTG1,BTG2,C9orf72,CASP3,CCL3L3,CCL5,CD47,CDKN1A,CDKN1B,CNR1,CREBBP,EFNB1,EPRS1,FOXO3,GATA3,GDNF,GLP1R,HERPUD1,INSR,KLF6,KLF7,KSR1,MAP3K1,NQO2,NR3C1,NR4A2,PPP1R13B,PTCH1,PTGS2,RAPGEF3,RARA,REL,RNF216,SIRT1,SNRK,SOX11,SP1,STK4,TNF,TNFRSF21,TRIM2,UBA1,UPF1,ZNF746	49
	Cancer,Organismal Injury and Abnormalities	Solid tumor	2.72e-18		-0.813	ABCF1,ABTB2,ACIN1,ACKR2,ACTN1,ACTN4,ADAMTS1,ADAMTS15,ADAMTSL2,ADAP2,ADARB1,ADRA1A,AEN,AHDC1,AHR,AKAP7,ALG6,AMMECR1L,AMOTL2,ANAPC13,ANGPT2,ANGPTL4,ANKRD11,AP3D1,AP3M1,AP5B1,ARFGAP1,ARFGAP2,ARL4D,ARL5B,ASB3/GPR75-ASB3,ATF2,ATF3,ATP1A1,ATP7B,AXIN1,AXIN2,B4GALT4,BAIAP2,BANP,BCAP29,BCAR3,BCL2L1,BCLAF3,BET1,BNIP3L,BOP1,BTG1,BTG2,BTG3,BYSL,C17orf80,C1GALT1C1,C6orf62,C9orf40,C9orf72,CAMTA2,CAPN15,CARM1,C…	451
	Free Radical Scavenging	Production of reactive oxygen species	6.15e-08		-0.816	AHR,ANGPT2,BCL2L1,CASP3,CCL5,CD36,CDKN1A,CRTC2,CXCL2,DLST,E4F1,FOXO3,GLP1R,INSR,KLF4,LIMK1,NR4A1,PFKFB3,POLG,PRF1,PRKAA2,PTGER4,PTGS2,RAPGEF1,RAPGEF3,RIPK2,RND3,SELENOT,SESN3,SIRT1,SYK,SYVN1,TNF,USP10,ZC3H12A	35
	Cellular Movement,Hematological System Development and Function,Immune Cell Trafficking	Cell movement of mononuclear leukocytes	6.1e-08		-0.821	ACKR2,ACTN4,ANGPT2,Brd4,CCL3L3,CCL5,CCN1,CCNT1,CD47,CXCL6,DBNL,DEK,DPYSL2,EFNB1,Foxp1,GATA2,GATA3,INSR,KLF2,LIMK1,MYH9,NFKBIZ,NQO2,NR3C1,NR4A1,P2RY10,PRF1,PTGS2,PTPRB,RAPGEF1,RGS16,S1PR1,SCRIB,SERP1,SH2D3C,STK4,TLN1,TNF,TNFRSF21,Tnfsf9,ZC3H12A	41
	Cancer,Organismal Injury and Abnormalities	Extraadrenal retroperitoneal tumor	5.41e-08		-0.848	ABCF1,ABTB2,ACIN1,ACTN4,ADAMTS1,ADAMTS15,ADARB1,AHR,AKAP7,ANGPT2,ANKRD11,AP3D1,ARFGAP1,ARFGAP2,ASB3/GPR75-ASB3,ATF2,ATF3,ATP7B,AXIN2,BAIAP2,BCAR3,BCL2L1,BNIP3L,BTG2,BTG3,C6orf62,CAMTA2,CAPN15,CASKIN2,CASP3,CASS4,CCL3L3,CCL5,CCN1,CCNL1,CDC42EP3,CDKN1A,CDKN1B,CDON,CHERP,CHIC1,CLK1,CNKSR3,CPSF1,CREB3L4,CREBBP,CREBRF,CRTC2,CWF19L2,CXCL2,CXCL6,DCTN1,DDX27,DIP2C,DLST,DOLK,DRAM2,DUSP16,E4F1,EGR3,EIF4A2,…	176
	Cancer,Organismal Injury and Abnormalities,Reproductive System Disease	Prostatic tumor	4.27e-08		-0.851	ACIN1,ADAMTS15,ADAP2,ADRA1A,ANKRD11,AP3D1,ARFGAP2,ATF3,ATP1A1,AXIN1,AXIN2,B4GALT4,BANP,BCAR3,BCL2L1,BCLAF3,BNIP3L,BTG3,C17orf80,CAMTA2,CARM1,CASP3,CBX4,CCL5,CDC42EP4,CDKN1A,CDKN1B,CDON,CHERP,CHIC1,CLK1,CNR1,CPSF1,CREBBP,CTDP1,CWF19L2,CXCL6,CXXC1,CYTH1,DACT1,DCTN1,DDX27,DGKQ,DIP2C,DLGAP4,DNAJA3,DNASE1L2,DOLK,DPY19L4,DUSP16,DUSP5,DYNC1H1,EGR3,EHF,EP400,ERCC5,FBXO33,FEM1A,FOXO3,GAK,GATA3,GATA5,GGPS1…	168
	Cellular Movement	Invasion of cells	5.41e-06		-0.874	ACTN4,ADAMTS1,ADAMTS15,AHR,ANGPT2,ANGPTL4,ANKRD11,ATF3,BCAR3,BCL2L1,BTG2,BTG3,CASP3,CCN1,CDKN1A,CDKN1B,CNR1,CSK,CXCL2,CXCL6,DACT1,DBNL,DIXDC1,DNAJB4,DPYSL2,EFNB1,FAM107A,FGF7,FOXO3,GATA3,GATA5,GDNF,GLUL,HAS1,HCAR2,HES1,HHEX,HIC1,HSPA1A/HSPA1B,IER3,KLF2,KLF4,KLF6,KLF9,LIMK1,MAP3K1,MAP9,MYC,MYCT1,MYH9,NR4A1,NR4A2,NRP2,OSR1,PIK3R5,PRKD2,PTGER2,PTGS2,PTPN23,REL,RND3,RNF144B,SCRIB,SEMA7A,SERP1,SP1,SYK…	75
	Organismal Development	Mass of organism	1.01e-07		-0.886	ADAMTS1,ATP7B,Brd4,CD36,CDKN1A,CDKN1B,CISH,CNR1,CREBBP,CSNK1D,E4F1,EPRS1,G0S2,GDNF,GLP1R,GPAT4,HCAR2,HHEX,HSPA1A/HSPA1B,Hspa1b,INSR,KLF4,MYC,NR3C1,PLK2,PRKAA2,PTCH1,PTGS2,RAPGEF3,SGMS1,SIRT1,TNF,UNC5C	33
	Organismal Injury and Abnormalities	Angiogenesis of lesion	9.85e-06		-0.91	ADAMTS1,ANGPTL4,CCN1,CD36,CXCL6,GATA6,KLF6,MAP3K6,MYC,NRP2,PTGER2,PTGS2,S1PR1,SEMA7A,TNF	15
	Cancer,Organismal Injury and Abnormalities	Incidence of tumor	9.13e-15		-0.913	ABCF1,ABTB2,ACIN1,ACKR2,ACTN1,ACTN4,ADAMTS1,ADAMTS15,ADAMTSL2,ADAP2,ADARB1,ADRA1A,AHDC1,AHR,AKAP7,ALG6,AMMECR1L,AMOTL2,ANGPT2,ANGPTL4,ANKRD11,AP3D1,AP5B1,ARFGAP1,ARFGAP2,ARL4D,ASB3/GPR75-ASB3,ATF2,ATF3,ATP1A1,ATP7B,AXIN1,AXIN2,B4GALT4,BAIAP2,BANP,BCAP29,BCAR3,BCL2L1,BCLAF3,BNIP3L,BTG2,BTG3,BYSL,C17orf80,C6orf62,CAMTA2,CAPN15,CARM1,CASKIN2,CASP3,CASS4,CBX4,CCL5,CCN1,CCNG2,CCNT1,CD36,CD47,CDC42EP3,…	365
	Cancer,Organismal Injury and Abnormalities	Frequency of tumor	1.45e-14		-0.927	ABCF1,ABTB2,ACIN1,ACKR2,ACTN1,ACTN4,ADAMTS1,ADAMTS15,ADAMTSL2,ADAP2,ADARB1,ADRA1A,AHDC1,AHR,AKAP7,ALG6,AMMECR1L,AMOTL2,ANGPT2,ANGPTL4,ANKRD11,AP3D1,ARFGAP1,ARFGAP2,ASB3/GPR75-ASB3,ATF2,ATF3,ATP1A1,ATP7B,AXIN1,AXIN2,B4GALT4,BAIAP2,BANP,BCAP29,BCAR3,BCL2L1,BCLAF3,BNIP3L,BTG2,BTG3,BYSL,C17orf80,C6orf62,CAMTA2,CAPN15,CARM1,CASKIN2,CASP3,CASS4,CBX4,CCL5,CCN1,CCNG2,CCNT1,CD36,CD47,CDC42EP3,CDKN1A,CDKN1…	357
	Cancer,Organismal Injury and Abnormalities,Reproductive System Disease	Male genital neoplasm	3.16e-09		-0.952	ACIN1,ADAMTS15,ADAP2,ADRA1A,ANKRD11,AP3D1,ARFGAP2,ARL5B,ATF3,ATP1A1,AXIN1,AXIN2,B4GALT4,BANP,BCAR3,BCL2L1,BCLAF3,BNIP3L,BTG3,C17orf80,CAMTA2,CARM1,CASP3,CBX4,CCL5,CDC42EP4,CDKN1A,CDKN1B,CDON,CHERP,CHIC1,CHST8,CLK1,CNR1,CPSF1,CREBBP,CTDP1,CWF19L2,CXCL6,CXXC1,CYTH1,DACT1,DCTN1,DDX27,DGKQ,DIP2C,DLGAP4,DNAJA3,DNASE1L2,DOLK,DPY19L4,DUSP16,DUSP5,DYNC1H1,EGR3,EHF,EP400,ERCC5,FBXO33,FEM1A,FOXO3,GAK,GATA3…	176
	Organ Development,Reproductive System Development and Function	Growth of ovarian follicle	6.2e-06		-0.964	AHR,CDKN1A,CDKN1B,FOXO3,MYC,NR4A1,PTGER2,PTGS2,TNF	9
	Cell-To-Cell Signaling and Interaction	Activation of cells	2.51e-07		-0.967	AHR,ANGPT2,AP3D1,ATF3,BCL2L1,Brd4,C1GALT1C1,CASP3,CCL3L3,CCL5,CCN1,CD36,CD47,CDKN1A,CDKN1B,CISH,CNR1,CSK,CXCL2,CXCL6,DGKQ,E4F1,EGR3,FOXO3,Foxp1,GATA2,GATA3,GDNF,GLP1R,HSPA1A/HSPA1B,IER3,INSR,KCNJ2,KLF2,KLF4,KSR1,LFNG,LIMK1,MEOX2,MYC,NFKBIZ,NR4A1,NR4A2,PFKFB3,PLSCR1,POLG,PPP2R3C,PRF1,PTGER2,PTGER4,PTGS2,RAPGEF3,RC3H1,REL,RGCC,RIPK2,SIRT1,SP1,SPRY1,SYK,TLN1,TNF,TNFRSF21,Tnfsf9,ZC3H12A	65
	Cellular Growth and Proliferation,Organ Development,Reproductive System Development and Function	Proliferation of ovarian cells	6.63e-07		-0.97	AHR,CDKN1A,CDKN1B,FGF7,FOXO3,MYC,PTGER2,PTGS2,TNF	9
	Cancer,Organismal Injury and Abnormalities	Extracranial solid tumor	1.55e-16		-0.98	ABCF1,ABTB2,ACIN1,ACKR2,ACTN1,ACTN4,ADAMTS1,ADAMTS15,ADAMTSL2,ADAP2,ADARB1,ADRA1A,AEN,AHDC1,AHR,AKAP7,ALG6,AMMECR1L,AMOTL2,ANAPC13,ANGPT2,ANGPTL4,ANKRD11,AP3D1,AP3M1,AP5B1,ARFGAP1,ARFGAP2,ARL4D,ARL5B,ASB3/GPR75-ASB3,ATF2,ATF3,ATP1A1,ATP7B,AXIN1,AXIN2,B4GALT4,BAIAP2,BANP,BCAP29,BCAR3,BCL2L1,BCLAF3,BNIP3L,BOP1,BTG1,BTG2,BTG3,BYSL,C17orf80,C1GALT1C1,C6orf62,C9orf40,C9orf72,CAMTA2,CAPN15,CARM1,CASKIN…	446
	Cancer,Organismal Injury and Abnormalities	Subcutaneous tumor	6.51e-07		-0.988	ACTN4,ADAMTS1,ADARB1,AHR,ANGPT2,ARL4D,ATF3,BTG2,CCN1,CDC42EP3,CREBBP,DLGAP4,FOXO3,GPM6A,HHEX,HNMT,HOXA5,INSR,MED12,MYC,NR3C1,NR4A1,NR4A2,NRP2,OGN,PHLDA1,PTGER2,PTGER4,RAPGEF3,S1PR1,SF3A1,SUPT5H,UBAP2,UBE2B	34
	Cellular Development,Cellular Growth and Proliferation	Proliferation of blood cells	5.58e-10		-0.994	AHR,ATF2,AXIN1,BCL2L1,Brd4,BTG1,CASP3,CCL3L3,CCL5,CD36,CD47,CDKN1A,CDKN1B,CISH,Clec2d (includes others),CRTC2,CXCL2,DNAJA3,DUSP5,EFNB1,EGR3,FOXO3,Foxp1,GATA2,GATA3,HES1,HHEX,HOXA5,HSPA1A/HSPA1B,INSR,KLF2,KLF4,KLF9,KSR1,MAP3K1,MYC,MYH9,NFKBIZ,NR3C1,NR4A1,NUP98,PRF1,PTGER4,PTGS2,RARA,RC3H1,REL,RGS2,RIPK2,S1PR1,SCRIB,SH2D3C,SIRT1,SOX11,STK17B,STK4,SYK,TIFA,TLN1,TNF,TNFRSF21,Tnfsf9,TOB1,ZFP36L1,ZNF335	65
	Cell Cycle	G1 phase of tumor cell lines	3.25e-06		-0.995	ACIN1,ADRA1A,AHR,BCL2L1,BTG2,BTG3,CCN1,CCNG2,CDKN1A,CDKN1B,GATA3,GATA5,GPS2,HES1,INSR,KLF10,KLF4,MYC,NR3C1,PFKFB3,PLSCR1,RAD17,SP1,TNF,TOB1	25
	Cell Death and Survival,Organismal Injury and Abnormalities	Apoptosis of neurons	4.83e-08		-0.999	ADARB1,Agtr1b,ATF2,ATF3,BCL2L1,BTG1,BTG2,CASP3,CCL3L3,CCL5,CDKN1A,CNR1,CREBBP,FOXO3,GATA3,GDNF,GLP1R,HERPUD1,INSR,KLF6,KLF7,KSR1,MAP3K1,NQO2,NR3C1,NR4A2,PTCH1,PTGS2,RAPGEF3,REL,RNF216,SIRT1,SNRK,SOX11,TNF,TNFRSF21,TRIM2	37
	Cell-To-Cell Signaling and Interaction	Response of tumor cell lines	3.21e-06		-1.007	BCL2L1,CD47,CDKN1A,CREBBP,CSK,FGF7,KLF2,LIMK1,MYC,NHLRC1,NR3C1,NRP2,PIK3R5,PPP6R1,PRKD2,RAPGEF3,SF3A1,SGMS1,SLX4,SPTSSA,TLN1,TNF	22
	Infectious Diseases,Organismal Injury and Abnormalities	Infection by RNA virus	4.71e-08		-1.018	ADRA1A,ANKRD11,ARHGAP23,ARL5B,ATP1A1,BAIAP2,BCL2L1,BET1,BTG2,CCL3L3,CCL5,CCNT1,CD36,CDC42EP3,CDKN1A,CRTC2,CTDP1,CXCL2,CXCL6,DLGAP4,DLST,DUSP16,DYNC1H1,EGR3,EHF,ERCC5,FKBP5,GATAD2A,GGPS1,GLP1R,GTF2A1,HES1,HSPA1A/HSPA1B,INSR,KCNJ2,KLF2,KLF6,LNX2,LRIF1,LZTFL1,MED12,NR3C1,NR4A1,NR4A2,NRP2,NUP98,P2RY10,PER2,PHF12,PLSCR1,PNRC1,POLG,PPM1K,PPP1R13B,PRF1,PTGER4,PTGS2,RAPGEF1,RAPGEF3,RARA,RGS2,RNF216,SAFB,…	74
	Cell-To-Cell Signaling and Interaction,Hematological System Development and Function,Immune Cell Trafficking,Inflammatory Response	Activation of lymphocytes	1.41e-06		-1.049	AHR,BCL2L1,Brd4,CCL5,CD47,CDKN1A,CDKN1B,CISH,CNR1,CSK,EGR3,FOXO3,Foxp1,GATA3,HSPA1A/HSPA1B,KLF2,KSR1,LFNG,MYC,NFKBIZ,NR4A1,NR4A2,PPP2R3C,PRF1,PTGER4,RC3H1,REL,RIPK2,SIRT1,SPRY1,SYK,TLN1,TNF,TNFRSF21,Tnfsf9,ZC3H12A	36
	Cancer,Organismal Injury and Abnormalities	Non-hematological solid tumor	1.05e-19		-1.065	ABCF1,ABTB2,ACIN1,ACKR2,ACTN1,ACTN4,ADAMTS1,ADAMTS15,ADAMTSL2,ADAP2,ADARB1,ADRA1A,AEN,AHDC1,AHR,AKAP7,ALG6,AMMECR1L,AMOTL2,ANGPT2,ANGPTL4,ANKRD11,AP3D1,AP3M1,AP5B1,ARFGAP1,ARFGAP2,ARL4D,ARL5B,ASB3/GPR75-ASB3,ATF2,ATF3,ATP1A1,ATP7B,AXIN1,AXIN2,B4GALT4,BAIAP2,BANP,BCAP29,BCAR3,BCL2L1,BCLAF3,BET1,BNIP3L,BOP1,BTG1,BTG2,BTG3,BYSL,C17orf80,C1GALT1C1,C6orf62,C9orf40,C9orf72,CAMTA2,CAPN15,CARM1,CASKIN2,C…	447
	Cell-To-Cell Signaling and Interaction,Hematological System Development and Function	Activation of blood cells	5.62e-07		-1.067	AHR,ANGPT2,AP3D1,ATF3,BCL2L1,Brd4,C1GALT1C1,CCL5,CD36,CD47,CDKN1A,CDKN1B,CISH,CNR1,CSK,CXCL6,DGKQ,E4F1,EGR3,FOXO3,Foxp1,GATA3,GDNF,HSPA1A/HSPA1B,KLF2,KLF4,KSR1,LFNG,LIMK1,MYC,NFKBIZ,NR4A1,NR4A2,PFKFB3,PLSCR1,PPP2R3C,PRF1,PTGER2,PTGER4,PTGS2,RAPGEF3,RC3H1,REL,RIPK2,SIRT1,SPRY1,SYK,TLN1,TNF,TNFRSF21,Tnfsf9,ZC3H12A	52
	Hereditary Disorder,Neurological Disease,Organismal Injury and Abnormalities	Familial neurological disorder	1.64e-06		-1.067	ACKR2,ACTN1,ADARB1,ADRA1A,AHDC1,ALG6,ANGPT2,ANKRD11,AP5B1,ATP1A1,ATP7B,BAIAP2,BANP,BCL2L1,C9orf72,CASP3,CCL5,CD36,CDKN1B,CDON,CLK1,CNR1,CREBBP,CSNK1D,CTDP1,CXCL6,CYTH1,DACT1,DCTN1,DUSP5,DYNC1H1,EFNB1,EPRS1,ERCC5,FAM107A,FOXO3,Foxp1,GATA3,GDNF,GEMIN5,GLUL,HERPUD1,HNMT,HSPA1A/HSPA1B,IER3,IER3IP1,INSIG1,KCNJ2,KDM5C,KLC2,KLF2,KLF4,LIMK1,LZTFL1,MBD4,MED12,MYH14,MYH9,NACC1,NADK2,NECAP1,NHLRC1,NMT2,NOVA…	108
	Cell Death and Survival,Organismal Injury and Abnormalities	Cell death of breast cancer cell lines	1.89e-08		-1.086	ACTN4,AHR,ANGPT2,ATF2,BCL2L1,BNIP3L,CASP3,CCN1,CD47,CDKN1A,DNAJA3,FBXO32,FGF7,FOXO3,HCAR2,HOXA5,HSPA1A/HSPA1B,IER3,KLF4,KSR1,MYBBP1A,PELP1,PFKFB3,PLK2,PRKD2,PTGS2,RGS16,RIPK2,RNF31,SIRT1,SP1,TNF,UBA1,ZNF367	34
	Neurological Disease,Organismal Injury and Abnormalities	Neurogenic lesion	5.24e-17		-1.135	ABCF1,ACIN1,ACKR2,ACTN1,ACTN4,ADAMTS1,ADAMTS15,ADAMTSL2,ADRA1A,AHDC1,AHR,AMMECR1L,AMOTL2,ANGPT2,ANKRD11,AP3D1,AP5B1,ARFGAP1,ARFGAP2,ARL5B,ASB3/GPR75-ASB3,ATF2,ATP1A1,ATP7B,AXIN1,AXIN2,B4GALT4,BAIAP2,BANP,BCL2L1,BCLAF3,BET1,BNIP3L,BTG2,BTG3,C1GALT1C1,CAMTA2,CAPN15,CARM1,CASKIN2,CASP3,CASS4,CBX4,CCNG2,CCNL1,CCNT1,CDC42EP3,CDC42EP4,CDKN1A,CDKN1B,CDON,CEPT1,CHERP,CHIC1,CHST8,CISH,CNKSR3,CNR1,COQ10B,C…	297
	Neurological Disease,Organismal Injury and Abnormalities	Brain lesion	1.31e-16		-1.135	ABCF1,ACIN1,ACKR2,ACTN1,ACTN4,ADAMTS1,ADAMTS15,ADAMTSL2,ADRA1A,AHDC1,AHR,AMMECR1L,AMOTL2,ANGPT2,ANKRD11,AP3D1,AP5B1,ARFGAP1,ARFGAP2,ARL5B,ASB3/GPR75-ASB3,ATF2,ATP1A1,ATP7B,AXIN1,AXIN2,B4GALT4,BAIAP2,BANP,BCL2L1,BCLAF3,BET1,BNIP3L,BTG2,BTG3,C1GALT1C1,CAMTA2,CAPN15,CARM1,CASKIN2,CASP3,CASS4,CBX4,CCNG2,CCNL1,CCNT1,CDC42EP3,CDC42EP4,CDKN1B,CDON,CEPT1,CHERP,CHIC1,CHST8,CISH,CNKSR3,CNR1,COQ10B,CPSF1,CR…	294
	Connective Tissue Disorders,Inflammatory Disease,Organismal Injury and Abnormalities,Skeletal and Muscular Disorders	Rheumatic Disease	2.54e-06		-1.14	ACKR2,ACTN1,ADAMTS1,ADAMTS15,ADRA1A,AHR,ARFGAP1,C6orf62,C9orf72,CASP3,CCL3L3,CCL5,CD36,CDKN1A,CHST8,CISH,CLK2,CNR1,CSK,CXCL2,CXCL6,DACT1,DCTN1,DEK,DIP2C,EFNB1,EGR3,FKBP5,FOXO3,G0S2,GGPS1,GLP1R,GLUL,HES1,HNMT,HSPA1A/HSPA1B,KCNJ2,KLF13,KSR1,LRIG3,MBD1,MYC,MYLIP,NMT2,NQO2,NR3C1,NR4A1,NR4A2,PLSCR1,PTGER2,PTGER4,PTGS2,REL,RGCC,RIPK2,RNF144B,S1PR1,SAFB,SIRT1,SOX11,STK17B,SYK,SYVN1,TNF,TNFRSF21,UBA1,UBE…	68
	Cell-To-Cell Signaling and Interaction,Hematological System Development and Function,Immune Cell Trafficking,Inflammatory Response	Activation of leukocytes	1.73e-06		-1.141	AHR,ANGPT2,AP3D1,ATF3,BCL2L1,Brd4,CCL5,CD36,CD47,CDKN1A,CDKN1B,CISH,CNR1,CSK,CXCL6,EGR3,FOXO3,Foxp1,GATA3,GDNF,HSPA1A/HSPA1B,KLF2,KLF4,KSR1,LFNG,MYC,NFKBIZ,NR4A1,NR4A2,PFKFB3,PLSCR1,PPP2R3C,PRF1,PTGER2,PTGER4,PTGS2,RAPGEF3,RC3H1,REL,RIPK2,SIRT1,SPRY1,SYK,TLN1,TNF,TNFRSF21,Tnfsf9,ZC3H12A	48
	Cancer,Organismal Injury and Abnormalities	Head and neck cancer	1.35e-15		-1.146	ABCF1,ABTB2,ACIN1,ACTN1,ACTN4,ADAMTS1,ADAMTS15,ADAMTSL2,ADAP2,ADARB1,ADRA1A,AEN,AHDC1,AHR,AKAP7,ALG6,AMMECR1L,AMOTL2,ANGPT2,ANGPTL4,ANKRD11,AP3D1,AP3M1,AP5B1,ARFGAP1,ARFGAP2,ARL5B,ASB3/GPR75-ASB3,ATF2,ATP1A1,ATP7B,AXIN1,AXIN2,B4GALT4,BAIAP2,BANP,BCAP29,BCAR3,BCL2L1,BCLAF3,BOP1,BTG1,BTG2,BTG3,BYSL,C17orf80,C1GALT1C1,C9orf40,C9orf72,CAMTA2,CAPN15,CARM1,CASKIN2,CASP3,CBX4,CCN1,CCNL1,CCNT1,CD36,CD47,…	381
	Cell-To-Cell Signaling and Interaction,Inflammatory Response	Immune response of tumor cell lines	3.4e-07		-1.166	BCL2L1,CD47,CDKN1A,CREBBP,CSK,FGF7,KLF2,LIMK1,MYC,NR3C1,NRP2,PIK3R5,PPP6R1,PRKD2,RAPGEF3,SF3A1,SGMS1,SLX4,SPTSSA,TLN1,TNF	21
	Cell Cycle,Gene Expression	Binding of DNA	1.4e-10		-1.17	AHR,ANGPT2,ATF3,BANP,Brd4,BTG2,CARM1,CDKN1A,CISH,CREBBP,EGR3,ERCC5,FOSL2,FOXO3,Foxp1,FOXP4,GATA2,GATA3,GTF2A1,HEY1,HSPA1A/HSPA1B,IER3,INSR,KAT2B,KLF13,MAP3K1,MEOX2,MYC,NFKBIZ,NR3C1,NR4A1,NR4A2,PELP1,POLG,PTGER2,RAPGEF3,RARA,REL,RGCC,S1PR1,SIRT1,SP1,STK4,TNF	44
	Organismal Injury and Abnormalities	Abdominal lesion	9.07e-15		-1.189	ABCF1,ABTB2,ACIN1,ACKR2,ACTN1,ACTN4,ADAMTS1,ADAMTS15,ADAMTSL2,ADAP2,ADARB1,ADRA1A,AEN,Agtr1b,AHDC1,AHR,AKAP7,ALG6,AMMECR1L,AMOTL2,ANGPT2,ANGPTL4,ANKRD11,AP3D1,AP3M1,AP5B1,ARFGAP1,ARFGAP2,ARL4D,ARL5B,ASB3/GPR75-ASB3,ATF2,ATF3,ATP1A1,ATP7B,AXIN1,AXIN2,B4GALT4,BAIAP2,BANP,BCAP29,BCAR3,BCL2L1,BCLAF3,BNIP3L,BOP1,Brd4,BTG1,BTG2,BTG3,BYSL,C17orf80,C6orf62,C9orf72,CAMTA2,CAPN15,CARM1,CASKIN2,CASP3,CASS4,…	423
	Cancer,Organismal Injury and Abnormalities	Benign Tumors	1.18e-08		-1.207	ADARB1,AHR,ALG6,ANGPT2,ARL4D,ATF2,ATP1A1,AXIN1,AXIN2,BCL2L1,BYSL,CCN1,CDC42EP3,CDKN1A,CDKN1B,CNR1,DACT1,DLGAP4,DUSP5,ERCC5,FGF7,FOXO3,GGPS1,GLUL,GPM6A,HES1,HNMT,HOXA5,INSR,KLF10,KLF2,KLF4,LIMK1,MAP3K1,MED12,MYC,MYH9,NR3C1,NR4A1,NR4A2,NRP2,OGN,PHLDA1,PPP6C,PTCH1,PTCH2,PTGER2,PTGER4,PTGS2,RABGAP1L,RAPGEF3,RARA,RIN3,RND3,S1PR1,SCRIB,SELENOP,SF3A1,SIRT1,SOX11,SPRY4,SUPT5H,TET1,UBE2B,ZC3H12A	65
	Cancer,Organismal Injury and Abnormalities	Benign solid tumor	2.09e-08		-1.207	ADARB1,AHR,ALG6,ANGPT2,ARL4D,ATF2,ATP1A1,AXIN1,AXIN2,BCL2L1,BYSL,CCN1,CDC42EP3,CDKN1A,CDKN1B,CNR1,DACT1,DLGAP4,DUSP5,ERCC5,FGF7,FOXO3,GGPS1,GLUL,GPM6A,HES1,HNMT,HOXA5,INSR,KLF10,KLF2,KLF4,LIMK1,MAP3K1,MED12,MYC,MYH9,NR3C1,NR4A1,NR4A2,NRP2,OGN,PHLDA1,PPP6C,PTCH1,PTCH2,PTGER2,PTGER4,PTGS2,RABGAP1L,RAPGEF3,RARA,RIN3,RND3,S1PR1,SCRIB,SELENOP,SF3A1,SOX11,SPRY4,SUPT5H,TET1,UBE2B,ZC3H12A	64
	Cancer,Organismal Injury and Abnormalities	Non-melanoma solid tumor	8.4e-22		-1.283	ABCF1,ABTB2,ACIN1,ACKR2,ACTN1,ACTN4,ADAMTS1,ADAMTS15,ADAMTSL2,ADAP2,ADARB1,ADRA1A,AEN,AHDC1,AHR,AKAP7,ALG6,AMMECR1L,AMOTL2,ANGPT2,ANGPTL4,ANKRD11,AP3D1,AP3M1,AP5B1,ARFGAP1,ARFGAP2,ARL4D,ARL5B,ASB3/GPR75-ASB3,ATF2,ATF3,ATP1A1,ATP7B,AXIN1,AXIN2,B4GALT4,BAIAP2,BANP,BCAP29,BCAR3,BCL2L1,BCLAF3,BET1,BNIP3L,BOP1,BTG1,BTG2,BTG3,BYSL,C17orf80,C1GALT1C1,C6orf62,C9orf40,C9orf72,CAMTA2,CAPN15,CARM1,CASKIN2,C…	449
	Organismal Injury and Abnormalities,Organismal Survival	Perinatal death	1.2e-06		-1.288	ACTN4,ADAMTS1,ANGPTL4,ATF2,CASP3,CBX4,CDKN1A,CDON,CREBBP,DACT1,EFNB1,EGR3,Foxp1,GAK,GATA6,GDNF,HES1,HLX,HOXA5,KCNJ2,KIRREL1,KLF4,MEOX2,NR3C1,NR4A2,NUP98,PTGER4,PTGS2,RARA,RC3H1,REL,SAFB,SCRIB,SH2D3C,SIRT1,SNRK,SOX11,SPRY4,SYK,TNF	40
	Cellular Development,Cellular Growth and Proliferation,Hematological System Development and Function,Lymphoid Tissue Structure and Development	Proliferation of mononuclear leukocytes	2.11e-09		-1.305	AHR,ATF2,BCL2L1,Brd4,CASP3,CCL5,CD36,CD47,CDKN1A,CDKN1B,CISH,Clec2d (includes others),CRTC2,CXCL2,DNAJA3,DUSP5,EFNB1,EGR3,FOXO3,Foxp1,GATA2,GATA3,HES1,HSPA1A/HSPA1B,INSR,KLF2,KLF4,KLF9,KSR1,MAP3K1,MYC,NFKBIZ,NR4A1,NUP98,PRF1,PTGER4,PTGS2,RC3H1,REL,RGS2,RIPK2,S1PR1,SCRIB,SH2D3C,SIRT1,SOX11,STK17B,STK4,SYK,TIFA,TLN1,TNF,TNFRSF21,Tnfsf9,TOB1,ZFP36L1,ZNF335	57
	Cellular Development,Cellular Growth and Proliferation,Hematological System Development and Function,Lymphoid Tissue Structure and Development	Proliferation of immune cells	1.14e-09		-1.346	AHR,ATF2,BCL2L1,Brd4,BTG1,CASP3,CCL5,CD36,CD47,CDKN1A,CDKN1B,CISH,Clec2d (includes others),CRTC2,CXCL2,DNAJA3,DUSP5,EFNB1,EGR3,FOXO3,Foxp1,GATA2,GATA3,HES1,HHEX,HSPA1A/HSPA1B,INSR,KLF2,KLF4,KLF9,KSR1,MAP3K1,MYC,NFKBIZ,NR3C1,NR4A1,NUP98,PRF1,PTGER4,PTGS2,RC3H1,REL,RGS2,RIPK2,S1PR1,SCRIB,SH2D3C,SIRT1,SOX11,STK17B,STK4,SYK,TIFA,TLN1,TNF,TNFRSF21,Tnfsf9,TOB1,ZFP36L1,ZNF335	60
	Cellular Development,Cellular Growth and Proliferation,Hematological System Development and Function,Lymphoid Tissue Structure and Development	Cell proliferation of T lymphocytes	5.2e-08		-1.348	AHR,ATF2,BCL2L1,Brd4,CASP3,CCL5,CD36,CD47,CDKN1A,CDKN1B,CISH,Clec2d (includes others),DNAJA3,DUSP5,EFNB1,EGR3,FOXO3,Foxp1,GATA3,HES1,HSPA1A/HSPA1B,INSR,KLF2,KLF4,KSR1,MYC,NR4A1,NUP98,PRF1,PTGER4,PTGS2,RC3H1,REL,RGS2,RIPK2,SCRIB,SIRT1,STK17B,STK4,SYK,TLN1,TNF,TNFRSF21,Tnfsf9,TOB1,ZFP36L1	46
	Cell-To-Cell Signaling and Interaction,Hematological System Development and Function,Immune Cell Trafficking,Inflammatory Response	Activation of T lymphocytes	2.85e-06		-1.351	BCL2L1,Brd4,CCL5,CD47,CDKN1A,CDKN1B,CISH,CNR1,CSK,EGR3,FOXO3,Foxp1,GATA3,HSPA1A/HSPA1B,KLF2,KSR1,LFNG,MYC,NR4A1,NR4A2,PRF1,PTGER4,RC3H1,REL,SIRT1,SPRY1,TLN1,TNF,TNFRSF21,Tnfsf9	30
	Cancer,Organismal Injury and Abnormalities	Abdominal neoplasm	7.6e-14		-1.353	ABCF1,ABTB2,ACIN1,ACKR2,ACTN1,ACTN4,ADAMTS1,ADAMTS15,ADAMTSL2,ADAP2,ADARB1,ADRA1A,AEN,AHDC1,AHR,AKAP7,ALG6,AMMECR1L,AMOTL2,ANGPT2,ANGPTL4,ANKRD11,AP3D1,AP3M1,AP5B1,ARFGAP1,ARFGAP2,ARL4D,ARL5B,ASB3/GPR75-ASB3,ATF2,ATF3,ATP1A1,ATP7B,AXIN1,AXIN2,B4GALT4,BAIAP2,BANP,BCAP29,BCAR3,BCL2L1,BCLAF3,BNIP3L,BOP1,BTG1,BTG2,BTG3,BYSL,C17orf80,C6orf62,C9orf72,CAMTA2,CAPN15,CARM1,CASKIN2,CASP3,CASS4,CBX4,CCL3L3,…	420
	Cancer,Organismal Injury and Abnormalities	Intraabdominal organ tumor	5.1e-14		-1.359	ABCF1,ABTB2,ACIN1,ACKR2,ACTN1,ACTN4,ADAMTS1,ADAMTS15,ADAMTSL2,ADAP2,ADARB1,ADRA1A,AEN,AHDC1,AHR,AKAP7,ALG6,AMMECR1L,AMOTL2,ANGPT2,ANGPTL4,ANKRD11,AP3D1,AP3M1,AP5B1,ARFGAP1,ARFGAP2,ARL4D,ARL5B,ASB3/GPR75-ASB3,ATF2,ATF3,ATP1A1,ATP7B,AXIN1,AXIN2,B4GALT4,BAIAP2,BANP,BCAP29,BCAR3,BCL2L1,BCLAF3,BNIP3L,BOP1,BTG1,BTG2,BTG3,BYSL,C17orf80,C6orf62,C9orf72,CAMTA2,CAPN15,CARM1,CASKIN2,CASP3,CASS4,CBX4,CCL3L3,…	416
	Endocrine System Disorders,Metabolic Disease,Organismal Injury and Abnormalities	Insulin resistance	1.58e-06		-1.372	ADRA1A,AHDC1,ATP1A1,BTG1,CCL5,CD36,CDKN1A,CDKN1B,CNR1,CRTC2,FKBP5,GATA2,GGPS1,GLP1R,HCAR2,INSR,KCNJ2,KLF15,NR3C1,NUCKS1,PFKFB3,PRKAA2,PTGS2,RAB2B,RAPGEF3,SERTAD2,SIRT1,TNF,TRARG1	29
	Respiratory System Development and Function,Tissue Morphology	Quantity of airway epithelial cells	2.61e-06		-1.387	AHR,FGF7,HES1,HOXA5,NR3C1,RARA,STK4	7
	Organ Morphology,Respiratory System Development and Function	Quantity of pulmonary alveolus	3.25e-06		-1.387	AHR,CD36,FGF7,HOXA5,NR3C1,RARA,STK4	7
	Neurological Disease,Organismal Injury and Abnormalities	Seizure disorder	3.23e-07		-1.403	ADARB1,ADRA1A,AHDC1,ANGPTL4,ATF3,ATP1A1,BAIAP2,CCN1,CDKN1A,CNR1,CXCL2,DBNL,DPYSL2,DUSP5,EGR3,FBXO33,FGF7,GDNF,HAS1,HES1,HSPA1A/HSPA1B,IER3IP1,KLF10,MYC,NACC1,NECAP1,NHLRC1,NR3C1,NR4A1,NR4A2,NRP2,PLK2,POLG,PTGS2,PTPN23,RAPGEF3,RGS16,RGS2,SELENOP,SEMA6B,SLC25A25,ST3GAL4,TIPARP,VARS1,WDR4	45
	Embryonic Development,Hematological System Development and Function,Lymphoid Tissue Structure and Development,Organ Development,Organismal Development,Tissue Development	Formation of lymphoid tissue	8.06e-07		-1.435	AHR,ANGPT2,AXIN1,CBX4,CDKN1A,CDKN1B,DNAJA3,EFNB1,EGR3,GATA2,GATA3,GATA6,HES1,LFNG,MYC,NFKBIZ,NQO2,NRP2,PPP2R3C,RARA,RC3H1,REL,S1PR1,SEMA7A,STK4,SYK,TNF,TNFRSF21	28
	Cell Death and Survival,Organismal Injury and Abnormalities	Apoptosis of breast cancer cell lines	1.65e-06		-1.472	ACTN4,AHR,ANGPT2,ATF2,BCL2L1,BNIP3L,CASP3,CCN1,CDKN1A,DNAJA3,FBXO32,FOXO3,HCAR2,HOXA5,IER3,KLF4,KSR1,MYBBP1A,PELP1,PLK2,PRKD2,PTGS2,RIPK2,RNF31,SIRT1,TNF,ZNF367	27
	Cellular Growth and Proliferation,Lymphoid Tissue Structure and Development	Proliferation of lymphatic system cells	4.01e-08		-1.483	AHR,ATF2,BCL2L1,Brd4,CASP3,CCL5,CD36,CD47,CDKN1A,CDKN1B,CISH,Clec2d (includes others),CRTC2,DNAJA3,DUSP5,EFNB1,EGR3,FOXO3,Foxp1,GATA2,GATA3,HES1,HSPA1A/HSPA1B,INSR,KLF2,KLF4,KLF9,KSR1,LFNG,MAP3K1,MYC,NFKBIZ,NR4A1,NUP98,PRF1,PTGER4,PTGS2,RC3H1,REL,RGS2,RIPK2,S1PR1,SCRIB,SH2D3C,SIRT1,SOX11,STK17B,STK4,SYK,TLN1,TNF,TNFRSF21,Tnfsf9,TOB1,ZFP36L1,ZNF335	56
	Cellular Development,Cellular Growth and Proliferation,Hematological System Development and Function,Lymphoid Tissue Structure and Development	Proliferation of lymphocytes	8.35e-09		-1.513	AHR,ATF2,BCL2L1,Brd4,CASP3,CCL5,CD36,CD47,CDKN1A,CDKN1B,CISH,Clec2d (includes others),CRTC2,DNAJA3,DUSP5,EFNB1,EGR3,FOXO3,Foxp1,GATA2,GATA3,HES1,HSPA1A/HSPA1B,INSR,KLF2,KLF4,KLF9,KSR1,MAP3K1,MYC,NFKBIZ,NR4A1,NUP98,PRF1,PTGER4,PTGS2,RC3H1,REL,RGS2,RIPK2,S1PR1,SCRIB,SH2D3C,SIRT1,SOX11,STK17B,STK4,SYK,TLN1,TNF,TNFRSF21,Tnfsf9,TOB1,ZFP36L1,ZNF335	55
	Connective Tissue Development and Function,Tissue Morphology	Quantity of connective tissue	9.38e-09		-1.518	ADAMTS1,AHR,ANGPT2,ANGPTL4,ATF2,ATF3,BNIP3L,CD36,CD47,CDKN1A,CDKN1B,Clec2d (includes others),CNR1,CREBBP,DNAJB4,FOSL2,FOXO3,G0S2,GATA2,GATA6,GLP1R,GPAT4,HOXA5,INSIG1,INSR,KLF10,KLF13,KLF2,KLF4,KSR1,MEOX2,MYC,NR3C1,NR4A1,NUCKS1,PER2,PRF1,RAPGEF3,RASSF2,RUNX1T1,S1PR1,SGMS1,SLC25A25,TNF,TOB1	45
	Cardiovascular Disease,Developmental Disorder,Organismal Injury and Abnormalities	Congenital heart disease	9.37e-06		-1.61	ADRA1A,ATP1A1,CCL5,CXCL6,Foxp1,GATA5,GATA6,GNG5,HEY1,HHEX,HIRA,KCNJ2,KLF13,MYH9,NR3C1,PTCH1,PTGS2,RARA,SIRT1,SOX11,STK4,TGIF1,TNF,UBE2B	24
	Cancer,Gastrointestinal Disease,Organismal Injury and Abnormalities	Digestive organ tumor	4.77e-14		-1.629	ABCF1,ABTB2,ACIN1,ACKR2,ACTN1,ACTN4,ADAMTS1,ADAMTS15,ADAMTSL2,ADAP2,ADARB1,ADRA1A,AEN,AHDC1,AHR,AKAP7,ALG6,AMMECR1L,AMOTL2,ANGPT2,ANGPTL4,ANKRD11,AP3D1,AP3M1,AP5B1,ARFGAP1,ARFGAP2,ARL4D,ARL5B,ASB3/GPR75-ASB3,ATF2,ATF3,ATP1A1,ATP7B,AXIN1,AXIN2,B4GALT4,BAIAP2,BANP,BCAP29,BCAR3,BCL2L1,BCLAF3,BNIP3L,BOP1,BTG1,BTG3,BYSL,C17orf80,C9orf72,CAMTA2,CAPN15,CARM1,CASKIN2,CASP3,CASS4,CBX4,CCL3L3,CCL5,CCN1,CCN…	403
	Cell Cycle	Cell cycle progression	6.94e-15		-1.63	ADARB1,AHR,ATF3,BANP,BCL2L1,BOP1,Brd4,BTG1,BTG2,BTG3,CASP3,CCN1,CCNG2,CCNL1,CCNT1,CDKN1A,CDKN1B,CREBBP,CSK,CSNK1D,DAPK3,DENND2B,DNAJB4,DYNC1H1,E4F1,EHF,EP400,FGF7,FOSL2,FOXO3,GAK,GATA2,GATA3,HAS1,HES1,HSPA1A/HSPA1B,IER3,INSR,JADE2,JDP2,KLF10,KLF4,KLF6,MAP3K1,MAP9,MARK4,MYBBP1A,MYC,MYH14,NR3C1,NR4A1,NR4A2,NUCKS1,NUDCD3,NUP98,PELP1,PER2,PHF12,PLK2,PPP1R13B,PTCH1,PTCH2,PTGS2,PTPRB,RAD17,RAPGEF3,RARA…	86
	Cancer,Organismal Injury and Abnormalities	Tumorigenesis of tissue	3.87e-17		-1.722	ABCF1,ABTB2,ACIN1,ACKR2,ACTN1,ACTN4,ADAMTS1,ADAMTS15,ADAMTSL2,ADAP2,ADARB1,ADRA1A,AEN,AHDC1,AHR,AKAP7,ALG6,AMMECR1L,AMOTL2,ANGPT2,ANGPTL4,ANKRD11,AP3D1,AP3M1,AP5B1,ARFGAP1,ARFGAP2,ARL4D,ARL5B,ASB3/GPR75-ASB3,ATF2,ATF3,ATP1A1,ATP7B,AXIN1,AXIN2,B4GALT4,BAIAP2,BANP,BCAP29,BCAR3,BCL2L1,BCLAF3,BNIP3L,BOP1,BTG1,BTG2,BTG3,BYSL,C17orf80,C1GALT1C1,C6orf62,C9orf40,C9orf72,CAMTA2,CAPN15,CARM1,CASKIN2,CASP3,…	439
	Neurological Disease,Organismal Injury and Abnormalities	Seizures	2.5e-06		-1.727	ADARB1,ANGPTL4,ATF3,ATP1A1,BAIAP2,CCN1,CDKN1A,CNR1,CXCL2,DBNL,DUSP5,EGR3,FBXO33,FGF7,GDNF,HAS1,HES1,HSPA1A/HSPA1B,IER3IP1,KLF10,MYC,NECAP1,NHLRC1,NR3C1,NR4A1,NRP2,PLK2,POLG,PTGS2,PTPN23,RAPGEF3,RGS16,RGS2,SELENOP,SEMA6B,SLC25A25,TIPARP	37
	Inflammatory Response	Immune response of cells	2.71e-08		-1.742	ABCF1,AHR,ATP1A1,BCL2L1,Brd4,CD36,CD47,CDKN1A,CDKN1B,CNR1,CORO1C,CREBBP,CSK,FBXO32,FGF7,GATA2,KCNK13,KLF2,LIMK1,MYC,MYH9,NR3C1,NR4A2,NRP2,PFKFB3,PIK3R5,PLSCR1,PPP6R1,PRKAA2,PRKD2,PTGER2,PTGER4,RAPGEF3,REL,RGCC,SF3A1,SGMS1,SIRT1,SLX4,SPRY1,SPRY4,SPTSSA,STK4,SYK,TLN1,TNF,TRIM23	47
	Cellular Assembly and Organization	Assembly of organelle	1.08e-06		-1.853	ACTN1,AHR,ARFGAP1,BOP1,C9orf72,CASP3,CD36,CD47,CDKN1A,CDKN1B,Clec2d (includes others),CSNK1D,DCTN1,DNAJA3,DPYSL2,FAM107A,FGF7,FOXO3,GDNF,GLUL,GNG5,INSR,KAT2B,KIRREL1,KLF2,KSR1,LIMK1,MAP3K1,MARK4,MYH14,MYH9,NR4A1,NUDCD3,NUP188,OGN,PITPNM1,PLK2,PRKAA2,PTCH1,PTGER4,PTGS2,PTPN23,PTPRB,RAPGEF3,RGCC,RGS16,RIN3,RND3,RNF31,S1PR1,SIRT1,SNX18,SORBS3,STK4,TNF	55
	Connective Tissue Development and Function,Tissue Morphology	Quantity of connective tissue cells	1.82e-06		-1.915	AHR,ANGPT2,ATF3,CD47,CDKN1A,CDKN1B,Clec2d (includes others),CREBBP,FOSL2,GATA2,GLP1R,INSR,KLF10,KLF2,KLF4,KSR1,MYC,NR4A1,PER2,RASSF2,S1PR1,TNF,TOB1	23
	Cell-To-Cell Signaling and Interaction,Cellular Function and Maintenance,Inflammatory Response	Phagocytosis of tumor cell lines	7.21e-06	Decreased	-2.047	CD47,CREBBP,CSK,FGF7,KLF2,LIMK1,NRP2,PIK3R5,PPP6R1,PRKD2,RAPGEF3,SGMS1,SPTSSA,TLN1,TNF	15
	Organismal Injury and Abnormalities	Edema	3.98e-06	Decreased	-2.211	ADRA1A,AHR,ANGPT2,ANGPTL4,ATP1A1,CNR1,DAPK3,DBNL,EFNB1,FOXO3,Foxp1,GATA2,GATA6,HHEX,HIRA,HLX,KLF2,LIMK1,MYC,NFKBIZ,NR3C1,OSR1,PFKFB3,PTGER4,PTGS2,RNF216,SIRT1,SOX11,SYK,TNF	30
	Cell-To-Cell Signaling and Interaction,Cellular Function and Maintenance,Inflammatory Response	Phagocytosis of cells	3.78e-06	Decreased	-2.281	ABCF1,CD36,CD47,CORO1C,CREBBP,CSK,FGF7,GATA2,KLF2,LIMK1,MYH9,NR3C1,NRP2,PFKFB3,PIK3R5,PLSCR1,PPP6R1,PRKAA2,PRKD2,PTGER2,PTGER4,RAPGEF3,RGCC,SGMS1,SPTSSA,SYK,TLN1,TNF	28
	Cellular Function and Maintenance	Engulfment of cells	4.35e-07	Decreased	-2.458	ABCF1,ACTN1,ACTN4,ARFGAP1,AXIN1,BAIAP2,CCL5,CCNT1,CD36,CD47,CORO1C,CREBBP,CSK,DPYSL2,FGF7,GAK,GATA2,KLF2,LIMK1,MYH9,NR3C1,NRP2,PFKFB3,PIK3R5,PLSCR1,PPP6R1,PRF1,PRKAA2,PRKD2,PTGER2,PTGER4,RAPGEF3,RGCC,SGMS1,SPTSSA,STK4,SYK,TLN1,TNF	39
	Cellular Function and Maintenance	Engulfment of tumor cell lines	5.8e-07	Decreased	-2.458	ACTN1,ACTN4,BAIAP2,CCL5,CCNT1,CD36,CD47,CREBBP,CSK,FGF7,KLF2,LIMK1,NRP2,PIK3R5,PPP6R1,PRF1,PRKD2,RAPGEF3,SGMS1,SPTSSA,TLN1,TNF	22
	Cellular Function and Maintenance	Endocytosis	1.14e-08	Decreased	-2.51	ABCF1,ACTN1,ACTN4,ARFGAP1,AXIN1,BAIAP2,BCL2L1,C9orf72,CCL5,CCNT1,CD36,CD47,CORO1C,CREBBP,CSK,DGKQ,DPYSL2,FGF7,GAK,INSR,KLF2,LIMK1,MYC,MYH9,NECAP1,NR3C1,NRP2,PFKFB3,PIK3R5,PLSCR1,PPP6R1,PRF1,PRKAA2,PRKD2,PTGER4,RAPGEF3,RARA,RGCC,SCRIB,SGMS1,SNX18,SPTSSA,STK4,SYK,TLN1,TNF	46
	Cellular Function and Maintenance	Endocytosis by eukaryotic cells	2.02e-07	Decreased	-2.54	ABCF1,ACTN1,ACTN4,BAIAP2,CCL5,CCNT1,CD36,CD47,CREBBP,CSK,DPYSL2,FGF7,KLF2,LIMK1,MYH9,NR3C1,NRP2,PFKFB3,PIK3R5,PLSCR1,PPP6R1,PRF1,PRKAA2,PRKD2,PTGER4,RAPGEF3,RGCC,SGMS1,SPTSSA,STK4,SYK,TLN1,TNF	33

## Sheet: f IPA USRs 6dpi
	Upstream Regulator	Expr Log Ratio	Molecule Type	Predicted Activation State	Activation z-score	p-value of overlap	Target Molecules in Dataset	Mechanistic Network				Cytokine USRs	Upstream Regulator	Expr Log Ratio	Molecule Type	Predicted Activation State	Activation z-score	p-value of overlap	Target Molecules in Dataset	Mechanistic Network
[truncated: 1,339 more rows]

## Sheet: g Yoshida SpatialDecon
	6 mice per group	M1 BA.5+MP	M2 BA.5+MP	M3 BA.5+MP	M4 BA.5+MP	M5 BA.5+MP	M6 BA.5+MP	M1 BA.5-MP	M2 BA.5-MP	M3 BA.5-MP	M4 BA.5-MP	M5 BA.5-MP	M6 BA.5-MP
Cell-type deconvolution performed using SpatialDecon using the gene list in tab b, with cell-type expression matrices obtained from Yoshida et al., 2019.	LTHSC.34..BM	5.1984	4.10656	6.00287	5.03257	4.43654	5.01801	5.17815	6.09838	4.82099	4.06185	3.29834	4.3386
	B1b.PC	0	0	0	0	0	0	0	0	0	0	0	0
	B.T1.Sp	3.09181	2.13982	4.22469	3.74946	4.4477	4.79069	5.36524	7.46827	3.50886	5.44569	6.10457	5.08481
	B.T3.Sp	0	0	0	0	0.424999	0.545288	0	0	0	0	0	0
	B.Fem.Sp	0	0	0	0	0	0	0	0	0	0	0	0
	B.Fo.Sp	1.10547	0	1.69651	1.65625	0	0	1.31817	0	0	0.0912283	0.573489	0.435353
	B.mem.Sp	0	0	0	0	0	0	0	0	0	0	0	0
	B.GC.CB.Sp	5.15057	0	0	0	0	0	0	0	0	0	0	0
[truncated: 30 more rows]

## Sheet: h Nanostring SpatialDecon
	Mouse cell atlas - lung															Immune cell family
[truncated: 29 more rows]

[truncated: 2 more sheets: i MSigDB, j BTMs]
