# Supplementary material for: Microplastics dysregulate innate immunity in the SARS-CoV-2 infected lung
Source: Front Immunol. 2024 May 13;15:1382655. doi: 10.3389/fimmu.2024.1382655 (PMC11128561; doi:10.3389/fimmu.2024.1382655)
Supplement: Supplementary file 8 [file Table_7.xlsx]

## Sheet: a Alignment summary
Lungs harvested at 2 dpi	Sample name	Group	dpi	Total reads	Viral reads	Viral reads per million		Mean viral RPM
Paired RNA-Seq reads were aligned to the mouse GRCm39 and the SARS-CoV-2 BA.5 reference genomes. Paired alignments were counted using Samtools	M1	BA.5+MP	2	32085060	48490	1511.3
	M2	BA.5+MP	2	44286374	29654	669.596
	M3	BA.5+MP	2	36166926	25876	715.46
	M4	BA.5+MP	2	33543502	3420	101.957
	M5	BA.5+MP	2	38810000	26478	682.247
	M6	BA.5+MP	2	42447714	4838	113.976		632.422		t test 2 dpi
	M1	BA.5	2	39113842	60146	1537.72				p=0.253
	M2	BA.5	2	36777196	67606	1838.26
	M3	BA.5	2	39260892	58960	1501.75
	M4	BA.5	2	32540688	27142	834.094
	M5	BA.5	2	28859364	13556	469.726
	M6	BA.5	2	35688846	5118	143.406		1054.16

## Sheet: b All BA.5+MPvsBA5 2dpi
	Ensembl_ID	HUGO_ID	logFC	logCPM	F	PValue	FDR
All genes BA.5+MP vs. BA.5, 2 dpi	ENSMUSG00000112022.3	Gm2436	8.41288	-0.338404	10.5084	0.00429175	0.0837334
	ENSMUSG00000114429.2	NA	6.95721	0.00668747	4.63504	0.0443801	0.261764
	ENSMUSG00000032315.7	Cyp1a1	4.97411	5.47801	7.88666	0.0097374	0.12967
	ENSMUSG00000085791.5	Rpl30-ps9	4.15752	0.96999	2.22915	0.149016	0.452197
	ENSMUSG00000027401.10	Tgm3	2.69406	2.04587	3.50026	0.0735975	0.326713
	ENSMUSG00000038540.15	Tmc3	2.29563	0.293303	8.87868	0.00651058	0.104786
	ENSMUSG00000120847.1	NA	2.06485	-0.10853	6.63781	0.0165615	0.166808
	ENSMUSG00000057074.7	Ces1g	2.0304	2.49879	6.28818	0.0193209	0.178834
	ENSMUSG00000083012.10	NA	1.93523	0.981752	9.58974	0.0049249	0.0904325
	ENSMUSG00000072693.3	NA	1.92986	0.742258	6.99088	0.0142101	0.153972
	ENSMUSG00000033508.9	Asprv1	1.79245	2.96449	2.24149	0.147384	0.450575
	ENSMUSG00000041984.3	Rptn	1.67927	3.36812	2.47756	0.128569	0.424984
	ENSMUSG00000028148.12	Them5	1.61438	0.219204	2.52291	0.125288	0.420148
	ENSMUSG00000107659.2	Gm44170	1.5857	-0.16496	2.12621	0.157758	0.464726
	ENSMUSG00000023034.8	Nr4a1	1.52423	7.61326	33.4919	5.75594e-06	0.00159237
	ENSMUSG00000006457.5	Actn3	1.51922	0.105882	4.14736	0.0528737	0.281571
	ENSMUSG00000062345.11	Serpinb2	1.49905	-0.354113	3.80199	0.062964	0.304397
	ENSMUSG00000096422.3	Igkv12-44	1.4922	1.30096	4.98553	0.0351456	0.236843
	ENSMUSG00000107877.3	NA	1.47685	2.3403	3.73717	0.065092	0.308702
	ENSMUSG00000028195.5	Ccn1	1.43394	8.35613	22.0817	8.91839e-05	0.00763391
	ENSMUSG00000075605.4	Slurp2	1.40846	-0.371607	13.4866	0.0011998	0.0398807
	ENSMUSG00000057933.11	Gsta2	1.39481	1.74344	11.1963	0.00269025	0.064321
	ENSMUSG00000032262.14	Elovl4	1.37377	0.0945833	4.04915	0.0555433	0.288146
	ENSMUSG00000000031.18	H19	1.35878	2.03722	2.30595	0.14194	0.442001
	ENSMUSG00000047586.5	Nccrp1	1.35607	0.86944	3.09289	0.0913778	0.362375
	ENSMUSG00000027737.11	Slc7a11	1.30843	1.7693	4.27287	0.0496704	0.274369
	ENSMUSG00000032454.10	Rbp2	1.29141	-0.288988	3.24451	0.0842381	0.348669
	ENSMUSG00000044103.5	Il36g	1.28421	1.91135	4.50309	0.044347	0.261733
	ENSMUSG00000091172.2	Gm17120	1.27559	-0.216715	2.78246	0.108294	0.392631
	ENSMUSG00000091971.4	Hspa1a	1.25206	7.63966	4.46735	0.0451298	0.264016
	ENSMUSG00000098008.2	A930001A20Rik	1.25047	0.173825	13.8867	0.00104808	0.037001
	ENSMUSG00000089998.3	Phtf1os	1.24658	1.65619	5.5329	0.0271985	0.209319
	ENSMUSG00000076612.9	Ighg2c	1.24332	3.07985	1.15795	0.292587	0.606591
	ENSMUSG00000087166.10	L1td1	1.17959	-0.307906	10.2688	0.0037981	0.0786574
	ENSMUSG00000090877.4	Hspa1b	1.15694	7.98683	4.33484	0.04817	0.270833
	ENSMUSG00000031725.9	Ces1f	1.15118	3.29543	2.34615	0.138666	0.439008
	ENSMUSG00000026227.12	2810459M11Rik	1.11065	0.208714	6.51366	0.0174879	0.170492
	ENSMUSG00000071745.2	Pwwp4b	1.10981	-0.338504	1.42147	0.244814	0.561862
	ENSMUSG00000006574.16	Slc4a1	1.10776	0.744069	7.82004	0.0100101	0.131451
	ENSMUSG00000095630.3	Igkv6-23	1.09452	0.58036	3.69191	0.0666265	0.312728
	ENSMUSG00000093485.2	Gm20708	1.09414	0.500269	1.82474	0.189346	0.50147
	ENSMUSG00000010538.15	Tsacc	1.08959	-0.0704884	11.6638	0.00227028	0.0587359
	ENSMUSG00000076652.5	Ighv7-3	1.08288	0.340396	1.57735	0.221228	0.537611
	ENSMUSG00000043461.14	Sptssb	1.08178	0.505635	6.14744	0.0205724	0.184385
	ENSMUSG00000027338.17	Prnd	1.07558	1.2394	10.7361	0.0031879	0.0713518
	ENSMUSG00000087502.2	Gm16091	1.06367	1.04637	25.5844	3.58501e-05	0.00437624
	ENSMUSG00000087390.2	Gm7598	1.05684	0.189194	21.1088	0.000116398	0.00914717
	ENSMUSG00000003849.9	Nqo1	1.04856	2.89069	5.20168	0.0317332	0.225569
	ENSMUSG00000034226.8	Rhov	1.04595	0.888399	14.6824	0.000804846	0.0317795
	ENSMUSG00000026398.15	Nr5a2	1.04386	0.45303	14.185	0.000948598	0.0350597
	ENSMUSG00000095079.7	Igha	1.03849	5.78056	2.26721	0.145183	0.447395
	ENSMUSG00000104204.2	Gm37397	1.02815	-0.218814	7.7105	0.0104769	0.134324
	ENSMUSG00000033730.5	Egr3	1.02608	3.14806	26.6166	2.77658e-05	0.00388139
	ENSMUSG00000005705.11	Agrp	1.02442	-0.165362	3.2771	0.0827886	0.345965
	ENSMUSG00000021359.17	Tfap2a	1.01617	-0.2611	6.18214	0.0202556	0.182844
	ENSMUSG00000078880.11	Gm14308	1.01531	0.0633445	4.18847	0.0517995	0.278762
	ENSMUSG00000042433.3	Dnaaf6b	1.0082	-0.188361	7.67388	0.0106382	0.134885
	ENSMUSG00000031097.16	Tnni2	1.0045	1.2687	2.05537	0.164567	0.47308
	ENSMUSG00000051279.3	Gdf6	0.999361	0.284513	9.86398	0.00443096	0.0850567
	ENSMUSG00000114053.3	Gm35330	0.990339	-0.130736	10.2038	0.00389272	0.0794629
	ENSMUSG00000109097.3	Gm29683	0.986719	-0.299819	8.98742	0.00623545	0.102723
	ENSMUSG00000091694.10	Apol11b	0.972118	-0.187061	6.14824	0.0205649	0.184385
	ENSMUSG00000078964.3	Ces1b	0.967728	-0.0515082	4.9606	0.0355649	0.238166
	ENSMUSG00000090152.2	Gm16285	0.965023	0.222847	11.1296	0.00275678	0.0651925
	ENSMUSG00000078881.11	Gm14434	0.964847	0.523285	2.33404	0.139642	0.440147
	ENSMUSG00000030672.13	Mylpf	0.95289	1.01681	1.79465	0.192905	0.504802
	ENSMUSG00000032796.9	Lama1	0.952701	1.54034	4.02405	0.0562499	0.289922
	ENSMUSG00000066537.6	Vmn2r57	0.952531	-0.235225	5.39575	0.0289823	0.214999
	ENSMUSG00000035121.7	Neil2	0.946678	0.720596	12.415	0.00173769	0.0504542
	ENSMUSG00000106631.3	Gm42669	0.942877	0.4913	14.4222	0.000876822	0.0337003
	ENSMUSG00000030680.7	Pagr1a	0.92418	1.66765	1.74976	0.198369	0.512067
	ENSMUSG00000063681.15	Crb1	0.923288	0.24085	8.58036	0.00733616	0.11253
	ENSMUSG00000116069.2	Gm49510	0.914641	-0.342448	0.64447	0.429973	0.720111
	ENSMUSG00000015854.8	Cd5l	0.904585	-0.151833	1.30916	0.263827	0.580514
	ENSMUSG00000027470.10	Mylk2	0.903605	0.0759023	5.18704	0.0319523	0.226123
	ENSMUSG00000112441.2	Gm48898	0.903489	0.369511	10.4367	0.00356537	0.0760173
	ENSMUSG00000043430.6	Psapl1	0.881713	0.817553	0.892688	0.354163	0.659245
	ENSMUSG00000079173.12	Zan	0.87803	0.130069	7.02568	0.0139992	0.15347
	ENSMUSG00000090698.3	Apold1	0.862762	2.45876	13.5632	0.001169	0.0392602
	ENSMUSG00000074570.15	Cass4	0.85601	4.08828	79.8133	4.22534e-09	3.33854e-05
	ENSMUSG00000030098.16	Grip2	0.854752	2.34243	7.60444	0.0109518	0.136673
	ENSMUSG00000058385.9	H2bc8	0.851305	-0.0799192	3.50559	0.0733929	0.326119
	ENSMUSG00000098488.8	Pla2g4b	0.846964	2.16138	4.01562	0.0564893	0.29056
	ENSMUSG00000103738.2	Gm37652	0.844072	-0.382533	5.31421	0.0301044	0.219625
	ENSMUSG00000090936.3	Gm17705	0.843096	-0.247247	8.43016	0.00939228	0.12787
	ENSMUSG00000087578.2	Ccdc142os	0.840023	0.610497	11.3819	0.00251415	0.0623466
	ENSMUSG00000120757.1	NA	0.838754	-0.191701	7.2998	0.0124529	0.145261
	ENSMUSG00000060962.13	Dmkn	0.833868	3.77175	3.81702	0.0624818	0.303208
	ENSMUSG00000044737.7	Klk14	0.829986	1.29677	1.67285	0.208184	0.522832
	ENSMUSG00000061825.11	Ces2c	0.816009	-0.335243	5.68938	0.0253111	0.203027
	ENSMUSG00000055148.8	Klf2	0.815986	7.93599	63.6608	3.3007e-08	6.69877e-05
	ENSMUSG00000028011.17	Tdo2	0.815686	0.245891	11.3337	0.00255864	0.0624863
	ENSMUSG00000120636.1	NA	0.813578	0.291198	6.91836	0.0146612	0.156928
	ENSMUSG00000064177.9	Ghrl	0.811945	-0.25788	3.93322	0.058893	0.295596
	ENSMUSG00000114321.2	Gm8971	0.801851	-0.0616679	5.00506	0.0348209	0.236422
	ENSMUSG00000074067.10	Gm10619	0.791948	0.230912	3.79862	0.0630725	0.304397
	ENSMUSG00000109771.2	NA	0.789845	-0.138499	10.8411	0.00575957	0.098361
	ENSMUSG00000097503.4	3110045C21Rik	0.786132	1.16126	7.70575	0.0104977	0.134387
	ENSMUSG00000026729.10	4930562F07Rik	0.782828	0.771702	5.24742	0.0310596	0.223212
	ENSMUSG00000100281.2	4930422M22Rik	0.780475	0.658436	7.3189	0.0123524	0.144501
	ENSMUSG00000097760.3	6030442K20Rik	0.76915	-0.180744	5.21327	0.031561	0.225135
	ENSMUSG00000115405.2	Gm41307	0.768858	0.378342	9.90383	0.00436381	0.0841406
	ENSMUSG00000068964.6	Gm6361	0.761296	1.97327	0.567462	0.458594	0.741438
	ENSMUSG00000070369.14	Itgad	0.757187	0.944091	2.15012	0.155536	0.46167
	ENSMUSG00000081629.2	Eif3s6-ps1	0.754903	-0.313588	3.67804	0.0671051	0.313395
	ENSMUSG00000060579.14	Fhit	0.752016	0.578365	12.4537	0.00171426	0.0499208
	ENSMUSG00000116815.2	Gm49760	0.751852	0.517438	7.95965	0.00944799	0.12787
	ENSMUSG00000042097.18	Zfp239	0.750746	0.902054	15.6092	0.000596276	0.0262999
	ENSMUSG00000064115.14	Cadm2	0.748614	0.232454	5.5015	0.0275958	0.210677
	ENSMUSG00000002633.5	Shh	0.747982	3.60878	8.72608	0.00691936	0.108054
	ENSMUSG00000121112.1	NA	0.747748	1.63773	15.572	0.000603395	0.0263303
	ENSMUSG00000039377.8	Hlx	0.74524	5.33073	47.4521	3.99699e-07	0.000346419
	ENSMUSG00000112160.2	BC024063	0.744814	1.44803	7.84875	0.00989156	0.130685
	ENSMUSG00000037053.7	Azgp1	0.743173	2.0857	11.6074	0.00231692	0.0591339
	ENSMUSG00000074461.4	Gm10699	0.743155	0.394214	7.95859	0.00945215	0.12787
	ENSMUSG00000112096.2	A430103D13Rik	0.742235	0.0730091	8.35164	0.00804701	0.118632
	ENSMUSG00000095675.3	Ccl21b	0.742034	4.88466	3.49595	0.0737635	0.326758
	ENSMUSG00000096596.3	Gm10591	0.742034	4.88466	3.49595	0.0737635	0.326758
	ENSMUSG00000053588.5	A730061H03Rik	0.740232	-0.319206	5.85202	0.0235022	0.196143
	ENSMUSG00000069270.7	H2ac6	0.739314	-0.132064	3.99439	0.0570978	0.291864
	ENSMUSG00000058159.15	T2	0.739128	1.98628	12.0516	0.00197601	0.0536867
	ENSMUSG00000082978.2	Rpsa-ps11	0.726535	-0.383158	5.81274	0.0239255	0.197959
	ENSMUSG00000097740.3	E030044B06Rik	0.725405	0.552272	6.5528	0.0171898	0.169492
	ENSMUSG00000032500.11	Dclk3	0.725333	1.01725	10.2717	0.00379396	0.0786574
	ENSMUSG00000094127.2	G530012D18Rik	0.723614	0.775558	1.1384	0.296604	0.609595
	ENSMUSG00000063383.6	Zfp947	0.721382	0.730952	11.4605	0.00244334	0.0612036
	ENSMUSG00000026826.14	Nr4a2	0.721069	3.8047	24.6955	4.48793e-05	0.00494389
	ENSMUSG00000074912.12	Gm14207	0.720965	2.20732	16.3843	0.000466758	0.0227269
	ENSMUSG00000028139.6	Riiad1	0.719925	2.27841	11.3922	0.00250476	0.0622028
	ENSMUSG00000037188.8	Grhl3	0.716798	0.41944	1.3475	0.257128	0.575091
	ENSMUSG00000015829.14	Tnr	0.71619	-0.223286	4.15612	0.0526428	0.280983
	ENSMUSG00000073705.11	Cenps	0.714806	0.0992127	5.81357	0.0239165	0.197959
	ENSMUSG00000073627.8	C130036L24Rik	0.713843	0.623315	7.26562	0.012635	0.146596
	ENSMUSG00000049107.14	Ntf3	0.713728	1.67621	11.51	0.00239995	0.0606425
	ENSMUSG00000104388.2	Gm37033	0.711245	0.828377	7.49429	0.0114702	0.139204
	ENSMUSG00000022868.7	Ahsg	0.709931	0.229519	3.26894	0.0831489	0.34666
	ENSMUSG00000113106.2	Gm47139	0.708972	1.86153	11.5682	0.0023499	0.059726
	ENSMUSG00000024136.15	Dnase1l2	0.70891	2.43299	24.6794	4.50637e-05	0.00494389
	ENSMUSG00000037129.8	Tmprss13	0.707021	1.96445	9.00531	0.00619142	0.102407
	ENSMUSG00000121092.1	NA	0.70602	2.19628	5.31237	0.0301302	0.219648
	ENSMUSG00000042851.18	Zc3h6	0.704539	2.89711	14.1885	0.0009475	0.0350597
	ENSMUSG00000078887.11	Gm6710	0.70388	0.337359	3.44567	0.075733	0.330647
	ENSMUSG00000090264.2	Eif4ebp3	0.702142	0.347802	1.4419	0.241546	0.559299
	ENSMUSG00000017002.15	Slpi	0.701005	4.41985	2.8944	0.101806	0.380612
	ENSMUSG00000105868.2	Gm43766	0.699513	0.597225	5.76602	0.0244401	0.19982
	ENSMUSG00000085733.2	Arhgap27os1	0.697413	0.158661	4.56031	0.0431257	0.25897
	ENSMUSG00000109517.2	Gm44763	0.693075	-0.361473	7.97892	0.0195716	0.179747
	ENSMUSG00000037681.14	Esyt3	0.69257	4.09017	38.4974	2.06182e-06	0.000910076
	ENSMUSG00000022947.9	Cbr3	0.690427	4.16208	4.89232	0.036742	0.24138
	ENSMUSG00000075591.3	Gm10874	0.687231	-0.264703	1.62394	0.214741	0.53085
	ENSMUSG00000095193.4	Gm20939	0.686987	1.38472	10.0018	0.0042034	0.0828752
	ENSMUSG00000097784.2	A430105J06Rik	0.684176	-0.121273	6.18261	0.0202514	0.182844
	ENSMUSG00000020140.16	Lgr5	0.683441	-0.199296	5.37229	0.0293002	0.216211
	ENSMUSG00000007122.12	Casq1	0.683035	0.924442	1.93648	0.176812	0.48664
	ENSMUSG00000056718.3	Gm13199	0.682342	0.102727	6.69368	0.0161623	0.165019
	ENSMUSG00000086868.2	Gm15883	0.680934	3.57311	13.4326	0.00122206	0.0402723
	ENSMUSG00000035910.16	Dcdc2a	0.679526	3.05932	23.7502	5.72647e-05	0.00586908
	ENSMUSG00000026228.7	Htr2b	0.678365	1.34063	3.84481	0.0616015	0.301213
	ENSMUSG00000037847.15	Nmrk1	0.676212	2.4387	25.0978	4.05186e-05	0.00471375
	ENSMUSG00000030792.9	Dkkl1	0.675098	0.74719	3.84613	0.0615601	0.301095
	ENSMUSG00000097890.4	4930547M16Rik	0.674919	0.25544	4.24439	0.0503777	0.275598
	ENSMUSG00000114172.2	Gm36298	0.674282	0.316777	6.24138	0.0197274	0.180237
	ENSMUSG00000097383.3	1500026H17Rik	0.673418	-0.381022	4.59062	0.042494	0.257549
	ENSMUSG00000038801.7	Scgb1c1	0.672826	2.80523	12.4595	0.00171079	0.0499208
	ENSMUSG00000085957.5	Syna	0.671412	0.551052	6.59492	0.0168753	0.168247
	ENSMUSG00000048721.3	Fndc9	0.671191	-0.0122107	1.20611	0.282997	0.596852
	ENSMUSG00000027376.16	Prom2	0.671105	1.3161	3.02463	0.0948179	0.369011
	ENSMUSG00000087252.2	Gm14379	0.670753	-0.350685	4.90581	0.0365062	0.240608
	ENSMUSG00000030638.14	Sh3gl3	0.66789	0.120642	5.98161	0.0221636	0.190662
	ENSMUSG00000006014.17	Prg4	0.666811	2.60192	1.18614	0.286923	0.600467
	ENSMUSG00000055125.8	M5C1000I18Rik	0.665284	0.162176	2.356	0.137877	0.43756
	ENSMUSG00000091956.3	C2cd4b	0.665081	1.95439	11.171	0.00271525	0.0647403
	ENSMUSG00000018868.5	Pnpla5	0.663427	0.33518	5.94522	0.0225308	0.192088
	ENSMUSG00000006235.7	Epor	0.660775	2.25458	20.5787	0.000134932	0.00994062
	ENSMUSG00000020884.16	Asgr1	0.66066	1.54564	4.57696	0.0427774	0.258183
	ENSMUSG00000030693.11	Klk10	0.658914	1.1043	0.536249	0.471081	0.748873
	ENSMUSG00000030510.12	Cers3	0.65355	0.470852	3.264	0.0833676	0.347212
	ENSMUSG00000108207.3	1810059H22Rik	0.652541	1.24808	9.94731	0.00429183	0.0837334
	ENSMUSG00000109764.2	Klkb1	0.650944	0.714515	5.56502	0.0267987	0.207683
	ENSMUSG00000020892.11	Aloxe3	0.650562	1.1664	2.13497	0.15694	0.463656
	ENSMUSG00000037446.15	Tulp1	0.650252	1.10297	11.1791	0.00270719	0.0646369
	ENSMUSG00000022809.5	Nr1i2	0.649482	0.261224	4.04486	0.0556634	0.288451
	ENSMUSG00000095571.3	Ighv5-17	0.643265	-0.171456	0.707658	0.408524	0.702863
	ENSMUSG00000030093.8	Wnt7a	0.643028	3.91817	27.8489	2.06111e-05	0.00319492
	ENSMUSG00000120991.1	NA	0.642144	-0.378028	3.50894	0.0732642	0.325798
	ENSMUSG00000104761.2	Gm43511	0.641884	-0.25961	2.41137	0.133541	0.431704
	ENSMUSG00000076677.2	Ighv6-3	0.641459	0.222278	0.717216	0.405422	0.699401
	ENSMUSG00000024891.7	Slc29a2	0.641062	1.08877	12.1468	0.00191031	0.0531515
	ENSMUSG00000063632.7	Sox11	0.640212	4.66269	16.8875	0.000399258	0.0206589
	ENSMUSG00000115249.2	Gm49085	0.637447	-0.181791	6.82368	0.0165049	0.166539
	ENSMUSG00000026388.16	3110009E18Rik	0.63717	0.102401	5.665	0.0255953	0.203986
	ENSMUSG00000034818.18	Celf5	0.636055	-0.122371	2.87701	0.102784	0.3826
	ENSMUSG00000037386.17	Rims2	0.635482	-0.180116	1.50983	0.231074	0.548315
	ENSMUSG00000071568.6	Gm5874	0.635286	0.180542	4.43634	0.0458213	0.265716
	ENSMUSG00000074981.15	Dcdc5	0.63513	-0.270622	2.50208	0.126783	0.422436
	ENSMUSG00000103857.2	Gm37249	0.634415	1.62057	12.9911	0.00142175	0.0445653
	ENSMUSG00000041695.3	Kcnj2	0.634363	4.53559	15.1647	0.00068785	0.0285646
	ENSMUSG00000109714.3	Gm35021	0.632414	0.0936608	5.39262	0.0290245	0.215005
	ENSMUSG00000026950.19	Neb	0.6307	0.877102	1.44818	0.240554	0.558266
	ENSMUSG00000101122.2	Gm17971	0.630126	0.00638031	4.24779	0.0502926	0.275588
	ENSMUSG00000090256.2	Alms1-ps1	0.62981	0.262324	3.98458	0.0573814	0.291977
	ENSMUSG00000025453.19	NA	0.629597	2.56903	1.67693	0.207649	0.522331
	ENSMUSG00000031637.14	Lrp2bp	0.629585	0.430459	5.00554	0.0348131	0.236422
	ENSMUSG00000025105.11	Bnc1	0.629291	2.38476	17.9968	0.000285049	0.0163611
	ENSMUSG00000094433.3	Igkv5-43	0.628875	0.0842216	1.33271	0.259687	0.578373
	ENSMUSG00000030854.18	Ptpn5	0.628803	0.436533	4.9885	0.0350959	0.236806
	ENSMUSG00000097836.2	Gm26903	0.627363	0.125646	2.61935	0.118632	0.409799
	ENSMUSG00000113003.2	Gm47138	0.624793	0.335896	3.42314	0.0766349	0.332347
	ENSMUSG00000097084.2	Foxl1	0.62099	1.46559	12.3362	0.0017866	0.0512729
	ENSMUSG00000003545.4	Fosb	0.620813	4.58374	4.26941	0.0497558	0.274369
	ENSMUSG00000089694.3	Nat8f7	0.619752	1.26068	2.70436	0.113107	0.400286
	ENSMUSG00000018451.8	6330403K07Rik	0.619704	1.69529	13.933	0.00103193	0.0366547
	ENSMUSG00000107546.2	Gm20560	0.617965	1.81071	6.15476	0.0205051	0.184187
	ENSMUSG00000050675.8	Gp1ba	0.617364	1.1485	4.66642	0.0409594	0.253223
	ENSMUSG00000121378.1	NA	0.61627	-0.190488	2.6496	0.116631	0.406233
	ENSMUSG00000072762.10	4930522L14Rik	0.614072	2.04942	11.3548	0.00253902	0.0624863
	ENSMUSG00000047986.13	Palm3	0.613999	0.586294	10.2724	0.00379302	0.0786574
	ENSMUSG00000026304.14	Rab17	0.612009	0.886011	8.46259	0.00769318	0.115713
	ENSMUSG00000083169.2	Gm6580	0.611557	0.293621	5.92015	0.0227876	0.193339
	ENSMUSG00000051726.7	Kcnf1	0.609154	0.953144	6.11541	0.0208695	0.185419
	ENSMUSG00000107163.2	Gm43496	0.608798	-0.314005	3.19474	0.0865084	0.353082
	ENSMUSG00000044339.13	Alkbh2	0.607297	1.31091	9.23198	0.00566214	0.0975068
	ENSMUSG00000026736.4	4930426L09Rik	0.606539	-0.254067	4.28401	0.0493968	0.27356
	ENSMUSG00000003665.8	Has1	0.605992	1.84366	6.25333	0.0196227	0.179778
	ENSMUSG00000018387.13	Shroom1	0.604882	2.43115	14.1939	0.000945789	0.0350597
	ENSMUSG00000078202.4	Nrarp	0.604047	5.78697	27.3055	2.34832e-05	0.00347912
	ENSMUSG00000022449.15	Adamts20	0.602204	-0.0170009	2.87793	0.102732	0.382546
	ENSMUSG00000103662.2	Gm34294	0.602186	-0.0956031	3.6822	0.0669611	0.313231
	ENSMUSG00000036144.7	Meox2	0.601937	4.54194	56.1249	9.86757e-08	0.00013282
	ENSMUSG00000092187.2	Gm20457	0.599285	0.779347	9.49514	0.00510903	0.0920873
	ENSMUSG00000032131.17	Abcg4	0.595124	0.452741	2.96105	0.0981581	0.374691
	ENSMUSG00000078653.5	Cntd1	0.593109	0.601969	2.32828	0.14011	0.440933
	ENSMUSG00000038152.6	5033430I15Rik	0.592564	0.207062	3.66599	0.0675237	0.314048
	ENSMUSG00000110397.3	Gm45540	0.591922	-0.332328	2.07429	0.162714	0.470395
	ENSMUSG00000097183.4	Gm17501	0.591746	2.5441	22.9181	7.12716e-05	0.00682553
	ENSMUSG00000078137.2	Ankrd63	0.591743	4.86124	22.8598	7.23837e-05	0.00684014
	ENSMUSG00000038236.9	Hoxa7	0.591276	3.34643	11.9899	0.0020199	0.0545372
	ENSMUSG00000024347.17	Psd2	0.590642	0.512534	5.04651	0.0341431	0.233742
	ENSMUSG00000120330.1	NA	0.5894	0.0762677	5.07835	0.0463555	0.266508
	ENSMUSG00000034460.10	Six4	0.5879	3.0788	12.6123	0.00162165	0.0483816
	ENSMUSG00000037801.14	Iqch	0.587793	-0.236807	2.47049	0.129089	0.425436
	ENSMUSG00000113019.3	Gm47467	0.587772	1.91214	13.9562	0.00102393	0.0366547
	ENSMUSG00000094392.2	Gm3788	0.587352	0.225138	4.75225	0.0392963	0.248286
	ENSMUSG00000021631.9	Mrps36-ps1	0.587204	0.191057	4.82699	0.0379094	0.24483
	ENSMUSG00000102961.2	Gm19918	0.587129	1.21747	3.25704	0.0836775	0.347833
	ENSMUSG00000071192.7	Wfikkn1	0.584709	0.0851226	2.94699	0.0989147	0.375676
	ENSMUSG00000058246.9	Gm10037	0.5839	-0.0218875	4.0214	0.0563249	0.290013
	ENSMUSG00000089756.3	Zfp966	0.583748	0.488042	1.90362	0.18039	0.491349
	ENSMUSG00000049038.4	Mterf2	0.583409	2.69271	22.3817	8.22526e-05	0.00732277
	ENSMUSG00000022871.14	Fetub	0.582793	2.15326	2.51344	0.125965	0.421389
	ENSMUSG00000114753.2	Gm34059	0.582517	0.86919	2.74159	0.110782	0.395821
	ENSMUSG00000093594.2	Gm20707	0.581239	1.39015	16.1266	0.000506048	0.024026
	ENSMUSG00000067577.10	A430093F15Rik	0.581214	-0.0641091	2.12176	0.158176	0.465104
	ENSMUSG00000025213.12	Kazald1	0.581029	3.2776	13.0777	0.00137993	0.0439217
	ENSMUSG00000098206.2	Mir181a-1hg	0.58092	1.17836	5.33439	0.0298222	0.218394
	ENSMUSG00000042182.17	Bend6	0.579922	0.398404	6.02513	0.0217331	0.188738
	ENSMUSG00000100254.2	Trpc2	0.578482	0.480147	1.05669	0.314217	0.625547
	ENSMUSG00000113669.3	Gm36723	0.576599	1.28003	5.77292	0.0243634	0.199676
	ENSMUSG00000110697.3	Gm31718	0.575716	-0.12076	5.22918	0.0313263	0.224014
	ENSMUSG00000015627.6	Gata5	0.574528	4.30605	9.09878	0.00596688	0.100417
	ENSMUSG00000076549.3	Igkv4-68	0.57415	-0.228103	0.853597	0.36473	0.667959
	ENSMUSG00000060336.7	Zfp937	0.573207	1.34067	8.106	0.00889582	0.124455
	ENSMUSG00000086212.9	Mkln1os	0.572584	0.0731232	3.05411	0.093314	0.365951
	ENSMUSG00000022144.5	Gdnf	0.572512	3.54692	22.3395	8.31898e-05	0.0073572
	ENSMUSG00000027398.14	Il1b	0.571664	4.26875	4.74999	0.0393391	0.248286
	ENSMUSG00000035606.9	Ky	0.569338	2.15023	7.67788	0.0106205	0.134868
	ENSMUSG00000063558.5	Aox1	0.568646	5.67695	7.47052	0.0115856	0.139655
	ENSMUSG00000038793.9	Lefty1	0.567914	1.80536	6.53051	0.0173589	0.170287
	ENSMUSG00000044646.16	Zbtb7c	0.567457	2.58751	6.2216	0.019902	0.181093
	ENSMUSG00000121339.1	NA	0.567011	0.086793	0.435946	0.515371	0.777836
	ENSMUSG00000084792.2	1700056N10Rik	0.566862	-0.319931	2.20837	0.150279	0.454385
	ENSMUSG00000022219.11	Cideb	0.565354	0.340637	3.90085	0.0598685	0.29795
	ENSMUSG00000038526.15	Car14	0.564492	4.55392	4.72845	0.0397497	0.249917
	ENSMUSG00000010760.6	Phlda2	0.561481	-0.08492	2.56384	0.122411	0.415207
	ENSMUSG00000092395.2	Gm20463	0.559252	1.89931	7.03159	0.0139637	0.15347
	ENSMUSG00000118423.2	Lrrc70	0.558706	0.970749	4.89024	0.0367786	0.241485
	ENSMUSG00000121240.1	NA	0.558658	1.21088	6.01945	0.0217888	0.18877
	ENSMUSG00000049580.13	Tsku	0.557612	4.55678	3.68617	0.066824	0.313061
	ENSMUSG00000091618.4	H60c	0.557579	0.589438	2.2334	0.148085	0.450968
	ENSMUSG00000121479.1	NA	0.556828	2.01194	9.32855	0.00545189	0.0953614
	ENSMUSG00000092335.2	NA	0.556447	0.209717	3.81772	0.0624595	0.303185
	ENSMUSG00000037735.8	2810032G03Rik	0.556147	-0.253356	5.38561	0.0314836	0.224768
	ENSMUSG00000076471.4	Trbv14	0.555412	-0.307264	0.602982	0.445026	0.731028
	ENSMUSG00000108815.2	Gm49388	0.55539	1.29928	0.110876	0.74204	0.900271
	ENSMUSG00000043448.14	Gjc2	0.555043	1.70156	7.19811	0.0130033	0.148681
	ENSMUSG00000003541.7	Ier3	0.55441	7.05357	30.1173	1.21383e-05	0.00253018
	ENSMUSG00000028681.12	Ptch2	0.554222	2.98613	12.1022	0.00194075	0.0533833
	ENSMUSG00000100005.9	B130024G19Rik	0.554136	3.63827	42.9671	8.8372e-07	0.000567805
	ENSMUSG00000035104.15	Eva1a	0.553976	2.80847	14.3655	0.000893449	0.0341878
	ENSMUSG00000038980.2	Rbbp8nl	0.552665	0.0453157	2.74138	0.110795	0.395821
	ENSMUSG00000030834.8	Abcc6	0.552345	-0.304624	2.88929	0.102093	0.381231
	ENSMUSG00000044461.7	Shisa2	0.552247	3.02118	9.9428	0.00429922	0.0837334
	ENSMUSG00000023940.15	Sgo1	0.552184	1.11519	3.23565	0.084637	0.349508
	ENSMUSG00000058975.8	Kcnc1	0.55152	0.0354938	1.9206	0.17853	0.488966
	ENSMUSG00000098318.9	Lockd	0.551378	0.468808	2.96186	0.0981144	0.374612
	ENSMUSG00000120986.1	NA	0.551327	0.474984	4.38089	0.047088	0.267949
	ENSMUSG00000102202.3	Gm33280	0.550248	1.15866	13.6494	0.00113536	0.0388955
	ENSMUSG00000075318.14	Scn2a	0.549289	0.0627159	2.55611	0.122948	0.415634
	ENSMUSG00000114554.2	5430425K12Rik	0.547737	0.68321	4.58859	0.042536	0.257624
	ENSMUSG00000087461.3	C230014O12Rik	0.54719	0.0429896	3.18756	0.0868416	0.353546
	ENSMUSG00000037813.14	D630003M21Rik	0.546208	1.78796	4.82522	0.0379418	0.244834
	ENSMUSG00000043419.12	Rnf227	0.546055	1.23525	8.19649	0.00857218	0.121895
	ENSMUSG00000121129.1	NA	0.545712	0.749274	1.87587	0.18348	0.494558
	ENSMUSG00000044628.6	Rnf208	0.545225	1.82893	4.76361	0.0390819	0.248058
	ENSMUSG00000113836.2	Gm3325	0.544626	1.00988	5.8695	0.0233166	0.195077
	ENSMUSG00000035678.9	Tnfsf9	0.544158	2.58868	8.19678	0.00857118	0.121895
	ENSMUSG00000019102.11	Aldh3a1	0.543999	4.52131	2.45578	0.130181	0.427377
	ENSMUSG00000064354.1	mt-Co2	0.542403	5.41609	0.785235	0.384336	0.683387
	ENSMUSG00000074865.12	NA	0.542325	2.49127	9.68966	0.00473827	0.0888887
	ENSMUSG00000038418.8	Egr1	0.541979	7.18572	3.72484	0.0655061	0.309902
	ENSMUSG00000082223.2	Gm15079	0.541701	0.325883	3.65478	0.0679162	0.314534
	ENSMUSG00000115007.3	5830448L01Rik	0.541441	1.0094	7.19352	0.0130288	0.148832
	ENSMUSG00000027796.3	Smad9	0.541119	3.62173	37.4948	2.51486e-06	0.000990742
	ENSMUSG00000027713.7	1810062G17Rik	0.540568	0.228648	2.95173	0.0986587	0.375484
	ENSMUSG00000084896.2	Gm11632	0.540454	1.05513	4.2457	0.0503449	0.275598
	ENSMUSG00000035486.15	Plk5	0.539223	1.34941	4.087	0.0544967	0.285564
	ENSMUSG00000118049.2	Gm50103	0.539206	0.102948	4.10931	0.0538905	0.284538
	ENSMUSG00000026628.14	Atf3	0.538459	5.19492	17.446	0.000336548	0.0184261
	ENSMUSG00000025578.10	Cbx8	0.538053	2.95455	30.9302	1.00973e-05	0.00233369
	ENSMUSG00000106927.2	Gm43598	0.537987	-0.193822	2.13161	0.157252	0.464126
	ENSMUSG00000028039.12	Efna3	0.537759	1.18961	3.89743	0.0599726	0.298099
	ENSMUSG00000114566.2	Gm48500	0.53722	-0.314592	2.75444	0.109993	0.394582
	ENSMUSG00000092192.8	Dnaaf4	0.536894	1.85622	8.21482	0.00850823	0.121895
	ENSMUSG00000090386.12	Mir99ahg	0.536592	1.99125	8.62036	0.00721908	0.11143
	ENSMUSG00000075266.6	Cenpw	0.536564	0.151566	2.51914	0.125557	0.420668
	ENSMUSG00000052525.15	Spdya	0.536538	-0.260955	2.34378	0.138856	0.439221
	ENSMUSG00000112922.2	Gm47572	0.536367	-0.035737	2.45917	0.129929	0.426954
	ENSMUSG00000022176.12	Rem2	0.535613	1.61619	10.7167	0.00321104	0.0715425
	ENSMUSG00000043644.6	0610009L18Rik	0.534801	1.82016	22.846	7.26506e-05	0.00684014
	ENSMUSG00000103649.2	Gm37768	0.53462	0.3102	2.83733	0.105056	0.38614
	ENSMUSG00000055235.12	Wdr86	0.534605	1.57339	6.11725	0.0208523	0.185419
	ENSMUSG00000042306.12	S100a14	0.534487	3.07867	2.18506	0.152357	0.456982
	ENSMUSG00000117916.3	9630028I04Rik	0.534256	2.96046	8.80032	0.00671707	0.106624
	ENSMUSG00000057716.8	Tmem178b	0.53396	-0.0715662	2.14249	0.156241	0.462954
	ENSMUSG00000039628.10	Hs3st6	0.532919	1.35196	8.55449	0.00741299	0.11308
	ENSMUSG00000038233.11	Gask1a	0.532603	3.38233	15.7876	0.000563322	0.0255695
	ENSMUSG00000084866.4	A930006K02Rik	0.531063	1.20226	8.96812	0.00628335	0.102751
	ENSMUSG00000095771.3	Igkv14-111	0.53058	0.778299	0.5595	0.461727	0.743342
	ENSMUSG00000020105.10	Lrig3	0.529888	3.87791	29.4252	1.42304e-05	0.00271066
	ENSMUSG00000100213.2	Gm28151	0.529867	1.12974	6.14236	0.0206191	0.184614
	ENSMUSG00000022615.8	Tymp	0.529707	3.15706	8.68862	0.00702396	0.109196
	ENSMUSG00000036196.17	Slc26a8	0.529121	-0.320065	2.55783	0.122828	0.415525
	ENSMUSG00000079038.4	D130040H23Rik	0.528802	0.199552	4.02742	0.0561543	0.289819
	ENSMUSG00000085615.4	A330035P11Rik	0.5259	0.594891	4.54715	0.0434032	0.259074
	ENSMUSG00000038253.7	Hoxa5	0.525348	5.29587	28.2238	1.88529e-05	0.00302589
	ENSMUSG00000079444.10	Gm21981	0.525046	0.337436	1.96078	0.174222	0.484434
	ENSMUSG00000006241.17	Ccdc159	0.523978	1.664	7.8826	0.00975379	0.129754
	ENSMUSG00000022759.16	Lrrc74b	0.52322	3.81478	12.2103	0.0018678	0.0523045
	ENSMUSG00000055733.7	Nap1l3	0.523118	1.60184	10.2507	0.00382425	0.0788389
	ENSMUSG00000096718.3	Zfp781	0.522708	2.03002	2.82956	0.105507	0.387225
	ENSMUSG00000073448.4	NA	0.522063	0.588669	6.32978	0.0189673	0.177144
	ENSMUSG00000096935.7	1700113A16Rik	0.52137	1.19184	5.06665	0.033819	0.232411
	ENSMUSG00000078552.11	Dcdc2b	0.520766	2.59734	13.0756	0.00138095	0.0439217
	ENSMUSG00000007591.16	Tssk4	0.519723	0.165957	4.12183	0.0535536	0.28345
	ENSMUSG00000086740.2	Gm17029	0.519361	0.682686	4.63984	0.0414903	0.255123
	ENSMUSG00000027895.11	Kcnc4	0.519255	-0.209242	1.32387	0.261231	0.579274
	ENSMUSG00000037432.16	Fer1l5	0.518244	0.0498917	3.09525	0.0912613	0.36216
	ENSMUSG00000045591.7	Olig3	0.517966	0.0405375	2.1231	0.158049	0.464943
	ENSMUSG00000028602.13	Tnfrsf8	0.517769	0.0788946	2.30548	0.141979	0.442001
	ENSMUSG00000085956.3	4930481B07Rik	0.517467	-0.387197	1.78971	0.193497	0.50549
	ENSMUSG00000027886.8	Cfap276	0.516856	1.69581	4.78647	0.0386544	0.246798
	ENSMUSG00000108228.3	6430584L05Rik	0.516458	0.186424	3.25088	0.0839528	0.348476
	ENSMUSG00000090516.2	Rps11-ps1	0.516016	0.112295	3.34161	0.0800031	0.34048
	ENSMUSG00000112278.3	Gm30025	0.515703	0.780022	4.27314	0.0496639	0.274369
	ENSMUSG00000087014.2	NA	0.514723	-0.257076	2.89368	0.101847	0.380612
	ENSMUSG00000054939.7	Zfp174	0.513373	1.94127	6.94088	0.0145195	0.156033
	ENSMUSG00000032487.9	Ptgs2	0.513278	3.98908	12.9624	0.00143593	0.0446865
	ENSMUSG00000093629.2	Prox2os	0.511569	0.768857	5.5627	0.0268273	0.207683
	ENSMUSG00000096950.3	Gm9530	0.511503	0.254642	3.0404	0.0940103	0.367269
	ENSMUSG00000004892.14	Bcan	0.511127	3.10893	8.2019	0.00855326	0.121895
	ENSMUSG00000118283.2	Gm7623	0.511124	0.330514	4.56576	0.0430114	0.258875
	ENSMUSG00000057060.9	Slc35f3	0.511118	1.34386	8.74435	0.00686897	0.107748
	ENSMUSG00000036502.15	Tmem255a	0.51089	0.337987	3.27865	0.0827203	0.345845
	ENSMUSG00000072769.8	Gm10419	0.510261	1.17249	5.25623	0.0309316	0.222661
	ENSMUSG00000068165.4	Gm10233	0.509849	1.31195	0.200852	0.658053	0.857259
	ENSMUSG00000089803.4	Gm10171	0.509849	1.31195	0.200852	0.658053	0.857259
	ENSMUSG00000030703.9	Gdpd3	0.508137	2.29095	9.37413	0.00535566	0.0941532
	ENSMUSG00000090093.9	Gm14399	0.50568	1.44727	6.08582	0.0211483	0.18618
	ENSMUSG00000023873.14	1700010I14Rik	0.505602	0.836693	6.9071	0.0147327	0.157155
	ENSMUSG00000086429.11	Gt(ROSA)26Sor	0.505405	3.00754	11.1533	0.0027329	0.0648915
	ENSMUSG00000028836.15	Slc30a2	0.50535	0.31098	4.02155	0.0563208	0.290013
	ENSMUSG00000044678.12	Ly6k	0.505162	-0.101409	1.24682	0.275212	0.590558
	ENSMUSG00000002588.14	Pon1	0.504973	5.60947	7.57842	0.0110719	0.137096
	ENSMUSG00000118264.2	Rps15-ps3	0.504928	0.291113	2.96498	0.0979474	0.37453
	ENSMUSG00000000690.6	Hoxb6	0.504201	2.00947	8.17477	0.00864867	0.122181
	ENSMUSG00000109243.2	Gm45867	0.502594	1.45832	5.71216	0.0250486	0.201669
	ENSMUSG00000024793.15	Tnfrsf25	0.501306	2.3411	9.25817	0.00560427	0.0970473
	ENSMUSG00000104950.2	4833413G10Rik	0.500909	2.59947	13.9606	0.00102244	0.0366547
	ENSMUSG00000058441.8	Panx2	0.500776	-0.0709998	2.0122	0.168891	0.478124
	ENSMUSG00000106073.2	Gm42892	0.500389	-0.307178	3.67269	0.0672906	0.313794
	ENSMUSG00000073207.2	Ccdc160	0.500299	1.62287	7.57077	0.0111074	0.137096
	ENSMUSG00000024042.8	Sik1	0.500214	7.06896	40.52	1.39474e-06	0.000696987
	ENSMUSG00000004902.8	Slc25a18	0.499219	0.486735	2.75158	0.110168	0.394761
	ENSMUSG00000040254.12	Sema3d	0.498836	3.16146	11.1135	0.00277315	0.0654901
	ENSMUSG00000063953.4	Amd2	0.498541	2.21504	4.7567	0.039212	0.248273
	ENSMUSG00000087354.3	4930404I05Rik	0.498327	2.17859	3.83375	0.0619502	0.302012
	ENSMUSG00000101605.2	Ace3	0.497963	1.70884	2.58756	0.12078	0.412937
	ENSMUSG00000108878.2	Gm49493	0.497611	0.429709	3.0449	0.0937811	0.366787
	ENSMUSG00000035936.7	Aldh5a1	0.497495	3.81489	16.5406	0.00044455	0.022207
	ENSMUSG00000034968.4	Lbx2	0.496624	0.462362	3.76564	0.0641475	0.306431
	ENSMUSG00000120814.1	NA	0.495655	-0.129626	1.16165	0.291835	0.605731
	ENSMUSG00000107944.2	Gm44280	0.494525	2.117	7.0128	0.0140768	0.15347
	ENSMUSG00000086807.10	Platr21	0.494198	1.51946	7.49224	0.0114801	0.139204
	ENSMUSG00000108079.3	Gm44210	0.494168	0.878861	4.1952	0.0516259	0.27826
	ENSMUSG00000098055.3	Gm26947	0.494154	-0.354399	1.14105	0.296055	0.609186
	ENSMUSG00000052387.17	Trpm3	0.494051	0.8189	5.68404	0.025373	0.20325
	ENSMUSG00000019894.15	Slc6a15	0.493916	1.9634	9.31171	0.00548793	0.0957984
	ENSMUSG00000048106.9	4632415L05Rik	0.493296	0.141624	0.503378	0.484854	0.756886
	ENSMUSG00000073427.5	Gm4924	0.493039	1.63553	7.1038	0.013538	0.151986
	ENSMUSG00000033731.11	3300002A11Rik	0.492307	2.07803	5.12854	0.0328446	0.229915
	ENSMUSG00000121158.1	Gm35162	0.491945	-0.264222	2.42483	0.132512	0.430252
	ENSMUSG00000120233.1	NA	0.490277	-0.143664	2.10777	0.159497	0.467172
	ENSMUSG00000040321.4	Zfp770	0.489856	3.28133	21.371	0.000108272	0.00877003
	ENSMUSG00000094420.3	Igkv10-96	0.48879	1.42186	1.26897	0.271096	0.586663
	ENSMUSG00000025140.16	Pycr1	0.48877	1.63759	9.23992	0.00564453	0.0973555
	ENSMUSG00000116097.3	Gm36738	0.487984	0.726341	6.46076	0.0270103	0.208703
	ENSMUSG00000091556.9	Gm14569	0.487835	-0.0719603	2.69156	0.11392	0.401854
	ENSMUSG00000051504.19	Siglech	0.486972	2.21128	4.16993	0.0522809	0.280135
	ENSMUSG00000032268.14	Tmprss5	0.486808	-0.0669786	2.01283	0.168827	0.478022
	ENSMUSG00000051029.9	Serpinb1b	0.485767	0.673837	5.90071	0.022989	0.193627
	ENSMUSG00000003271.18	Sult2b1	0.485424	1.28986	3.83346	0.0619593	0.302012
	ENSMUSG00000083027.2	Gm13140	0.484002	0.144526	2.23425	0.148012	0.450943
	ENSMUSG00000112388.3	AI463170	0.483083	-0.173486	1.93265	0.177225	0.486925
	ENSMUSG00000055489.9	Ano5	0.482726	1.14587	2.77274	0.10888	0.393195
	ENSMUSG00000095276.3	Gfy	0.482541	-0.260939	2.4115	0.165124	0.473443
	ENSMUSG00000032484.9	Ngp	0.48042	-0.17281	0.641602	0.430988	0.720836
	ENSMUSG00000032852.4	Rspo4	0.480236	0.198651	2.81065	0.106616	0.389317
	ENSMUSG00000055313.16	Pgbd1	0.480211	1.28302	7.06114	0.0137877	0.153176
	ENSMUSG00000019256.18	Ahr	0.480062	6.24212	15.7288	0.000573965	0.0257988
	ENSMUSG00000114255.2	Gm10734	0.479679	2.2432	9.3291	0.00545073	0.0953614
	ENSMUSG00000062184.12	Hs6st2	0.479195	1.89714	9.47854	0.00514211	0.0923662
	ENSMUSG00000016239.12	Lonrf3	0.479078	0.963752	5.40153	0.0289045	0.214758
	ENSMUSG00000117921.2	Gm50186	0.478972	0.109246	1.47618	0.236187	0.554841
	ENSMUSG00000052861.14	Dnah6	0.478067	4.85158	17.0146	0.000383948	0.0202291
	ENSMUSG00000090273.4	Prr22	0.477828	-0.162842	2.63756	0.117423	0.407388
	ENSMUSG00000045114.11	Prrt2	0.477439	2.29231	1.75588	0.197613	0.511334
	ENSMUSG00000072473.5	1700024G13Rik	0.477424	2.9857	7.85254	0.00987605	0.130633
	ENSMUSG00000101655.3	2310040G24Rik	0.47737	0.301325	2.71406	0.112496	0.399182
	ENSMUSG00000070604.6	Vsig10l	0.476696	2.6326	6.15506	0.0205023	0.184187
	ENSMUSG00000092586.9	Ly6g6c	0.476582	1.52344	0.810047	0.377046	0.677557
	ENSMUSG00000094257.3	Ap3s1-ps2	0.475872	1.03966	4.08414	0.0545751	0.285802
	ENSMUSG00000024190.8	Dusp1	0.475456	8.31088	3.21528	0.085563	0.351457
	ENSMUSG00000025461.12	Scart1	0.47516	2.46198	2.5035	0.12668	0.422367
	ENSMUSG00000021587.6	Pcsk1	0.474517	0.331235	2.55901	0.122746	0.415525
	ENSMUSG00000076431.5	Sox4	0.474185	5.68193	8.28592	0.00826503	0.119688
	ENSMUSG00000120623.1	NA	0.473791	4.74117	7.11821	0.0134547	0.15174
	ENSMUSG00000017740.18	Slc12a5	0.473785	2.68171	5.13786	0.0327006	0.229301
	ENSMUSG00000025893.9	Kbtbd3	0.473707	2.15987	5.91673	0.0228228	0.193339
	ENSMUSG00000019194.16	Scn1b	0.473611	3.64648	7.24615	0.01274	0.147353
	ENSMUSG00000022408.8	Fam83f	0.473569	0.81499	2.35886	0.137649	0.43756
	ENSMUSG00000110611.2	Gm20163	0.473321	0.741782	4.17716	0.0520925	0.279384
	ENSMUSG00000021928.10	Ebpl	0.473058	3.14315	18.4786	0.000246997	0.0152365
	ENSMUSG00000074577.10	Ripor3	0.472307	1.32943	6.73175	0.0158964	0.16392
	ENSMUSG00000074782.4	4833422C13Rik	0.471598	1.59147	9.56259	0.00497699	0.0907756
	ENSMUSG00000120153.1	NA	0.471466	1.40634	9.82016	0.0045061	0.0858654
	ENSMUSG00000022658.11	Tagln3	0.471006	-0.334888	1.84331	0.18719	0.498856
	ENSMUSG00000034472.14	Rasd2	0.470982	2.85362	11.91	0.0020783	0.0554975
	ENSMUSG00000052135.9	Foxo6	0.468074	1.95383	5.48208	0.0278448	0.211694
	ENSMUSG00000082776.4	Gm7061	0.467599	-0.0459919	2.25492	0.14623	0.449027
	ENSMUSG00000027849.20	Syt6	0.466994	0.919971	5.91509	0.0228398	0.193339
	ENSMUSG00000085289.2	Gm15337	0.466631	0.890523	4.60798	0.0421369	0.256433
	ENSMUSG00000036826.15	Igflr1	0.465175	1.36007	0.649332	0.428262	0.71859
	ENSMUSG00000062309.9	Rpp25	0.464947	0.229723	2.57769	0.121455	0.414196
	ENSMUSG00000117992.2	Gm41760	0.46492	0.52775	3.83791	0.0618188	0.301753
	ENSMUSG00000043017.10	Ptgir	0.464402	3.77724	11.1652	0.00272102	0.0647887
	ENSMUSG00000020623.12	Map2k6	0.46427	2.14177	6.97275	0.0143215	0.154576
	ENSMUSG00000097378.10	B230208H11Rik	0.464257	0.859446	4.43597	0.0458297	0.265716
	ENSMUSG00000086013.2	Gm15706	0.464155	1.45679	5.80972	0.0239585	0.198043
	ENSMUSG00000026819.16	Slc25a25	0.464048	5.61784	39.8807	1.57598e-06	0.000722081
	ENSMUSG00000114369.3	Gm41077	0.463975	0.277814	2.74557	0.110537	0.395469
	ENSMUSG00000106294.2	Gm8539	0.463798	1.19415	4.60348	0.0422292	0.256662
	ENSMUSG00000022203.8	Efs	0.463457	3.67796	13.1567	0.00134295	0.0429498
	ENSMUSG00000022758.15	P2rx6	0.463427	3.76663	16.0659	0.000515818	0.0242422
	ENSMUSG00000039720.8	Got1l1	0.463245	-0.179326	2.51065	0.126165	0.421561
	ENSMUSG00000105376.6	Gm36535	0.463227	0.858138	3.58603	0.0703798	0.319949
	ENSMUSG00000061510.4	Gm10101	0.461686	0.0219719	2.59795	0.120073	0.412065
	ENSMUSG00000020990.6	Cdkl1	0.461617	1.60629	7.19155	0.0130398	0.148832
	ENSMUSG00000035202.9	Lars2	0.460599	7.15225	3.41951	0.0767814	0.332742
	ENSMUSG00000054934.11	Kcnmb4	0.459124	1.51942	5.20144	0.0317368	0.225569
	ENSMUSG00000072763.3	5430403G16Rik	0.458848	1.54131	4.84176	0.037642	0.244388
	ENSMUSG00000085151.8	1110018N20Rik	0.458545	0.223657	3.0863	0.0917035	0.363086
	ENSMUSG00000057835.8	Zfp119a	0.458476	2.21421	8.01575	0.00923201	0.127107
	ENSMUSG00000051705.14	Senp8	0.458426	2.26127	9.62916	0.00485033	0.089445
	ENSMUSG00000073805.6	Insyn2a	0.458257	0.14283	1.21646	0.280989	0.594864
	ENSMUSG00000047146.18	Tet1	0.458219	2.42461	4.70131	0.0402739	0.251405
	ENSMUSG00000045875.14	Adra1a	0.458029	4.03531	16.3611	0.000470152	0.0228281
	ENSMUSG00000069515.7	Lyz1	0.458008	9.05666	1.69597	0.205172	0.520177
	ENSMUSG00000051098.7	Mblac2	0.457033	2.59017	12.11	0.00193541	0.0533833
	ENSMUSG00000044788.11	Fads6	0.455896	2.74537	12.0186	0.00199936	0.0540669
	ENSMUSG00000086604.3	Gm15510	0.454727	-0.19475	1.95133	0.175224	0.485389
	ENSMUSG00000037139.16	Myom3	0.454166	2.44863	6.30926	0.0191408	0.178093
	ENSMUSG00000045031.19	Cetn4	0.453875	2.63915	9.17414	0.00579233	0.098726
	ENSMUSG00000040612.14	Ildr2	0.453246	3.32318	10.1354	0.00399503	0.0803461
	ENSMUSG00000006711.16	D130043K22Rik	0.453213	0.978963	4.56231	0.0430836	0.25897
	ENSMUSG00000074004.4	B3gnt6	0.453145	0.391215	2.05408	0.164695	0.47308
	ENSMUSG00000048899.9	Rimkla	0.452677	0.155681	1.23701	0.277063	0.591643
	ENSMUSG00000086822.4	5330413P13Rik	0.452305	1.59749	4.01104	0.05662	0.2908
	ENSMUSG00000097239.8	Gm27029	0.452174	0.541246	1.01843	0.322954	0.633197
	ENSMUSG00002076161.1	Rn7sk	0.451317	0.946294	1.62852	0.214116	0.530169
	ENSMUSG00000029120.11	Ppp2r2c	0.45026	1.41105	1.83138	0.188571	0.500336
	ENSMUSG00000072625.2	Gdf2	0.450143	0.863528	2.33557	0.139518	0.440111
	ENSMUSG00000105368.2	Gm43759	0.449737	0.0319484	2.18114	0.152709	0.457472
	ENSMUSG00000031896.8	Ctrl	0.449592	0.166086	4.39858	0.0466796	0.267192
	ENSMUSG00000004814.11	Ccl24	0.449478	-0.157437	0.769008	0.389215	0.687206
	ENSMUSG00000047330.9	Kcne4	0.44793	4.04804	9.39504	0.00531213	0.0936729
	ENSMUSG00000120221.1	NA	0.447842	0.211708	2.25667	0.14608	0.448963
	ENSMUSG00000095930.2	Nim1k	0.447248	1.6089	6.09776	0.0210353	0.186153
	ENSMUSG00000117879.2	2310015A16Rik	0.447196	-0.339368	2.50415	0.132967	0.430975
	ENSMUSG00000111334.2	Gm30015	0.446787	0.387348	3.59096	0.0701997	0.319457
	ENSMUSG00000103761.2	Gm37859	0.446655	1.58622	4.78129	0.0387509	0.246951
	ENSMUSG00000118071.2	Gm50455	0.44656	-0.0223379	2.7763	0.108665	0.39284
	ENSMUSG00000108601.2	Gm44645	0.44642	0.335986	2.3267	0.140239	0.441121
	ENSMUSG00000106634.2	Gm43042	0.446133	3.39548	4.98165	0.0352105	0.236843
	ENSMUSG00000019762.5	Iyd	0.445641	2.33526	8.93605	0.00636381	0.103578
	ENSMUSG00000106547.2	B230303O12Rik	0.445619	0.0256155	2.782	0.108322	0.392631
	ENSMUSG00000089945.14	NA	0.445487	1.16819	0.563016	0.460339	0.742769
	ENSMUSG00000073295.5	Nudt11	0.445275	1.38821	4.47884	0.0448764	0.263245
	ENSMUSG00000006313.6	Upk1a	0.444941	0.7329	1.95257	0.175092	0.485306
	ENSMUSG00000017697.4	Ada	0.444419	2.26493	0.85236	0.365072	0.668081
	ENSMUSG00000020020.9	Usp44	0.443818	0.202118	3.28548	0.0824204	0.345257
	ENSMUSG00000028040.8	Efna4	0.443331	1.55247	9.67073	0.00477303	0.0891548
	ENSMUSG00000038777.20	Sema6c	0.443215	2.89819	6.76185	0.0156897	0.162561
	ENSMUSG00000035125.11	Gcfc2	0.442837	2.39064	6.13092	0.0207251	0.184798
	ENSMUSG00000034522.11	Zfp395	0.442525	5.69653	29.0734	1.54417e-05	0.00271519
	ENSMUSG00000035183.15	Slc24a5	0.441413	0.168649	2.52307	0.125276	0.420148
	ENSMUSG00000055137.8	Sugct	0.440848	1.28146	3.73274	0.0652405	0.309129
	ENSMUSG00000069727.6	Zfp975	0.440139	3.29195	27.8128	2.07899e-05	0.00319492
	ENSMUSG00000061126.6	Cyp4f39	0.440071	3.14189	6.93617	0.014549	0.156105
	ENSMUSG00000034394.15	Lif	0.43993	3.4645	9.2447	0.00563395	0.0972698
	ENSMUSG00000024184.16	Pdia2	0.439913	0.451245	3.35771	0.0793249	0.338925
	ENSMUSG00000028525.17	Pde4b	0.439787	6.98813	8.42331	0.00781645	0.116567
	ENSMUSG00000024905.16	Tesmin	0.439253	-0.339593	2.09321	0.160886	0.468706
	ENSMUSG00000053297.15	AI854703	0.439219	0.440732	1.60917	0.216771	0.532707
	ENSMUSG00000078963.4	Hsbp1l1	0.439035	0.00236282	1.86387	0.184836	0.496184
	ENSMUSG00000106783.3	Chaer1	0.438851	2.071	6.50507	0.0175541	0.17085
	ENSMUSG00000083718.3	Ccnb2-ps	0.437876	1.49472	6.63309	0.0165957	0.166958
	ENSMUSG00000119987.1	NA	0.43774	-0.161421	2.12479	0.157891	0.464823
	ENSMUSG00000048965.10	Mrgpre	0.437516	2.34074	10.0783	0.00408271	0.0811578
	ENSMUSG00000068794.8	Col28a1	0.435745	0.970027	2.5925	0.120443	0.4126
	ENSMUSG00000041479.15	Syt15	0.435596	4.48921	5.45468	0.0282004	0.212327
	ENSMUSG00000057719.12	Sh3rf2	0.435557	5.29174	41.4824	1.16318e-06	0.000665713
	ENSMUSG00000110935.2	Gm8834	0.435354	1.82313	3.42323	0.0766314	0.332347
	ENSMUSG00000024986.13	Hhex	0.43501	4.59354	20.7796	0.000127555	0.00966614
	ENSMUSG00000040187.16	Arntl2	0.4345	1.40833	4.56353	0.043058	0.25897
	ENSMUSG00000030544.6	Mesp1	0.433979	2.02857	7.14658	0.0132925	0.1504
	ENSMUSG00000038042.12	Ptpdc1	0.43363	4.00619	48.7026	3.23304e-07	0.000323744
	ENSMUSG00000085852.2	Gm13807	0.433231	0.0565571	1.9139	0.179262	0.489844
	ENSMUSG00000087259.9	2610035D17Rik	0.433009	3.08089	5.03522	0.0343262	0.234348
	ENSMUSG00000120584.1	Gm26641	0.432931	0.220257	3.55705	0.0789572	0.337896
	ENSMUSG00000047369.18	Dnah14	0.43253	1.1365	2.74761	0.110412	0.395275
	ENSMUSG00000025815.14	Dhtkd1	0.431902	1.4694	6.90038	0.0147755	0.157515
	ENSMUSG00000032392.12	Parp16	0.43165	3.35044	14.0322	0.000998216	0.0363033
	ENSMUSG00000007030.9	Vwa7	0.431483	2.75104	9.85033	0.00445422	0.0852201
	ENSMUSG00000111197.2	Gm10608	0.430944	0.575664	2.99378	0.096422	0.371996
	ENSMUSG00000116581.3	Gm46565	0.430895	1.21981	2.70869	0.112834	0.400053
	ENSMUSG00000072774.11	Zfp951	0.430838	2.41328	6.12978	0.0207356	0.184798
	ENSMUSG00000042826.14	Fgf11	0.430603	3.95127	13.3904	0.00123975	0.0405469
	ENSMUSG00000113346.4	Eprn	0.430571	-0.135751	2.07597	0.162551	0.470321
	ENSMUSG00000034813.20	Grip1	0.430161	1.59379	4.74543	0.0394257	0.248434
	ENSMUSG00000063698.10	Sfxn4	0.429856	2.40303	6.69908	0.0161243	0.164898
	ENSMUSG00000074579.15	Lekr1	0.429521	1.94026	11.3998	0.00249781	0.0621768
	ENSMUSG00000003469.10	Phyhip	0.429163	0.819844	1.32242	0.261485	0.579398
	ENSMUSG00000029695.14	Aass	0.428906	3.16451	15.2559	0.000667883	0.0280019
	ENSMUSG00000049353.18	Rd3	0.428803	2.81798	9.63387	0.00484151	0.089445
	ENSMUSG00000104253.2	Gm37174	0.428019	-0.334181	2.07095	0.16304	0.470792
	ENSMUSG00000055561.10	Spink5	0.427856	2.80622	3.04652	0.0936989	0.366669
	ENSMUSG00000079355.6	Ackr4	0.427422	3.42452	10.208	0.00388656	0.0794629
	ENSMUSG00000024331.12	Dsc2	0.42667	1.3342	0.484054	0.493273	0.762094
	ENSMUSG00000028943.19	Espn	0.426525	3.47906	10.4416	0.00355881	0.0760173
	ENSMUSG00000114245.2	Percc1	0.426485	1.84012	7.50105	0.0114376	0.13913
	ENSMUSG00000006542.14	Prkag3	0.426273	2.8638	6.90751	0.0147301	0.157155
	ENSMUSG00000032419.9	Tbx18	0.426102	0.647491	2.54128	0.123987	0.417429
	ENSMUSG00000078875.11	Gm14419	0.425944	0.884815	2.0351	0.166581	0.474919
	ENSMUSG00000085517.8	Gm12963	0.425373	0.770234	2.8846	0.102356	0.381885
	ENSMUSG00000112110.3	Gm15608	0.42491	0.290246	4.54506	0.0633691	0.304701
	ENSMUSG00000031079.13	Zfp300	0.424747	0.50852	2.4851	0.128016	0.423861
	ENSMUSG00000056267.15	Cep70	0.424387	4.17578	16.3226	0.000475856	0.0229763
	ENSMUSG00000037994.15	Slc9b2	0.424252	-0.31079	1.15605	0.292974	0.606915
	ENSMUSG00000040035.15	Disp2	0.424161	5.44673	3.00809	0.095674	0.370776
	ENSMUSG00000111897.2	Gm19810	0.42393	0.530421	3.24501	0.0842159	0.348669
	ENSMUSG00000098076.2	Gm6981	0.423801	-0.111983	1.60268	0.217671	0.533123
	ENSMUSG00000049357.12	Brd8dc	0.423608	0.627333	2.823	0.105891	0.388057
	ENSMUSG00000114184.2	Gm7143	0.423585	0.172643	1.59088	0.21932	0.534997
	ENSMUSG00000025889.14	Snca	0.423537	2.72436	1.74785	0.198606	0.512373
	ENSMUSG00000031379.14	Pir	0.423449	4.36714	9.43842	0.00522304	0.0928576
	ENSMUSG00000058921.4	Slc10a5	0.422206	0.263464	1.43996	0.241853	0.559345
	ENSMUSG00000053161.17	Daw1	0.422039	1.97208	4.57451	0.0428285	0.258215
	ENSMUSG00000030592.19	Ryr1	0.421638	0.655062	0.994445	0.328604	0.638576
	ENSMUSG00000116883.2	Gm49700	0.420498	0.148018	3.39014	0.101546	0.38061
	ENSMUSG00000029832.17	Nfe2l3	0.420225	2.38898	6.85964	0.0150381	0.15918
	ENSMUSG00000095332.3	Gm9821	0.420224	0.775678	2.31071	0.141547	0.44179
	ENSMUSG00000046056.16	Sbsn	0.420149	4.06965	2.13475	0.156959	0.463656
	ENSMUSG00000095730.4	Vmn2r29	0.419579	-0.343041	0.509645	0.482176	0.755828
	ENSMUSG00000096549.10	Prickle4	0.419557	-0.0941333	0.639811	0.431623	0.721481
	ENSMUSG00000034110.9	Kctd7	0.419329	3.77434	19.3737	0.000190144	0.0124847
	ENSMUSG00000045441.6	Gprin3	0.419124	2.76699	6.7009	0.0161116	0.164898
	ENSMUSG00000108402.2	9430064I24Rik	0.418963	2.72099	10.0181	0.0041774	0.0825667
	ENSMUSG00000044566.16	Cage1	0.418789	0.554907	3.37719	0.0785125	0.336699
	ENSMUSG00000069743.6	Zfp820	0.418048	2.26037	5.09291	0.0334017	0.231132
	ENSMUSG00000031853.6	Map3k21	0.417945	1.83658	8.60634	0.00725987	0.111776
	ENSMUSG00000079560.14	Hoxa3	0.417692	3.93019	10.1713	0.00394098	0.0797889
	ENSMUSG00000090338.3	Gm17081	0.417354	0.886289	2.91897	0.100443	0.378744
	ENSMUSG00000073197.10	5730507C01Rik	0.417336	-0.103114	1.4192	0.24518	0.562249
	ENSMUSG00000079357.10	Gm11100	0.416109	0.597471	3.33286	0.0803744	0.341055
	ENSMUSG00000101585.8	1600010M07Rik	0.415811	0.0981738	1.57094	0.222141	0.538619
	ENSMUSG00000087413.3	Gm11266	0.415727	1.23521	3.65297	0.0679796	0.314599
	ENSMUSG00000030145.15	Zfp248	0.414807	2.69884	12.3668	0.00176744	0.0508917
	ENSMUSG00000086216.2	Gm13610	0.414679	3.87116	5.53147	0.0272165	0.209319
	ENSMUSG00000121297.1	NA	0.414661	0.161964	1.79725	0.192594	0.504691
	ENSMUSG00000053070.6	Cfap300	0.412915	2.49821	9.63431	0.00484069	0.089445
	ENSMUSG00000037239.9	Spred3	0.412904	3.17443	7.15046	0.0132705	0.150347
	ENSMUSG00000021260.9	Hhipl1	0.412586	2.04473	5.20431	0.031694	0.225569
	ENSMUSG00000073867.3	AA474408	0.412385	0.283002	3.96219	0.066912	0.313231
	ENSMUSG00000075027.12	4631405J19Rik	0.412347	-0.0122611	2.38923	0.135256	0.434251
	ENSMUSG00000068014.6	Gm14648	0.412325	3.35581	3.93068	0.0589687	0.295719
	ENSMUSG00000117662.3	Gm4013	0.412213	0.811466	2.95949	0.0982418	0.374763
	ENSMUSG00000029601.14	Iqcd	0.412129	2.06852	3.72883	0.0653717	0.309467
	ENSMUSG00000022596.4	Slurp1	0.411574	2.02209	1.8986	0.180944	0.492138
	ENSMUSG00000020423.7	Btg2	0.411389	7.97803	6.43885	0.0180738	0.173954
	ENSMUSG00000096948.4	Gm4221	0.41134	1.13142	4.26501	0.0498644	0.274603
	ENSMUSG00000082431.4	Prdx2-ps1	0.410629	1.41492	5.01255	0.0346974	0.235953
	ENSMUSG00000115767.2	Gm10366	0.410587	0.313954	1.54174	0.226353	0.543361
	ENSMUSG00000040229.12	Gpr34	0.410103	1.82464	4.8303	0.0378494	0.244806
	ENSMUSG00000072974.5	Gm4787	0.409734	0.255634	3.02959	0.115663	0.405032
	ENSMUSG00000038295.15	Atg9b	0.409722	0.468014	0.79993	0.379994	0.679786
	ENSMUSG00000037627.17	Rgs22	0.409711	2.33238	7.49428	0.0114703	0.139204
	ENSMUSG00000052192.6	Gm5963	0.409589	0.249428	2.15392	0.155186	0.461046
	ENSMUSG00000042766.18	Trim46	0.409357	3.23191	7.46261	0.0116243	0.139927
	ENSMUSG00000021701.9	Plk2	0.409186	6.46642	12.6908	0.00157784	0.0474833
	ENSMUSG00000045775.16	Slc16a5	0.409128	-0.151619	2.44177	0.147185	0.450204
	ENSMUSG00000121487.1	NA	0.409016	-0.0207008	1.72296	0.201724	0.515735
	ENSMUSG00000027356.9	Fermt1	0.408994	2.34367	4.1023	0.0540802	0.284822
	ENSMUSG00000061397.9	Krt79	0.408537	3.84629	5.77082	0.0243867	0.199694
	ENSMUSG00000080797.3	Gm15760	0.408385	1.59409	4.21594	0.0510954	0.27695
	ENSMUSG00000064220.7	H2ac18	0.407789	2.49099	0.714084	0.406435	0.70066
	ENSMUSG00000040183.14	Ankrd6	0.407519	1.8027	8.7413	0.00687736	0.107748
	ENSMUSG00000033882.16	Rbm46	0.407357	0.631605	1.97943	0.172265	0.481923
	ENSMUSG00000111063.3	Zfp660	0.406779	1.57147	2.2421	0.147332	0.450494
	ENSMUSG00000026805.15	Barhl1	0.406683	-0.198137	2.65459	0.118457	0.409355
	ENSMUSG00000113113.2	Gm2614	0.406106	2.18965	10.3547	0.00367704	0.07754
	ENSMUSG00000099098.5	1110035H17Rik	0.405843	0.328045	3.1492	0.0886475	0.357519
	ENSMUSG00000111390.2	Gm48796	0.405704	0.912846	3.5302	0.0724557	0.323614
	ENSMUSG00000085558.9	4930412C18Rik	0.405358	2.05687	6.88943	0.0148456	0.158067
	ENSMUSG00000021730.9	Hcn1	0.40522	0.0181472	1.20903	0.282429	0.596518
	ENSMUSG00000021368.16	Tbc1d7	0.405166	2.94388	10.3646	0.00366329	0.0773533
	ENSMUSG00000028860.14	Sytl1	0.405092	2.41228	3.91671	0.0593884	0.296618
	ENSMUSG00000081382.2	Rpl18-ps1	0.404943	0.556654	3.29878	0.0818403	0.343409
	ENSMUSG00000041440.19	Gk5	0.404529	2.01892	7.82091	0.0100065	0.131451
	ENSMUSG00000078496.10	Zfp982	0.404379	0.780001	2.8855	0.102305	0.38186
	ENSMUSG00000097217.4	Gm26549	0.403428	-0.0808883	2.37813	0.136124	0.435105
	ENSMUSG00000025934.16	Gsta3	0.40317	6.95207	6.39634	0.0184164	0.175113
	ENSMUSG00000048138.11	Dmrt2	0.402935	0.921501	2.41794	0.133038	0.431043
	ENSMUSG00000013766.12	Ly6g6e	0.402481	0.654131	2.21879	0.149361	0.452628
	ENSMUSG00000033578.8	Tmem35a	0.402398	2.08757	5.1044	0.0332209	0.230987
	ENSMUSG00000089874.2	9230117E06Rik	0.402027	0.599501	2.93686	0.099464	0.376801
	ENSMUSG00000027457.16	Snph	0.401846	0.273136	2.47896	0.128466	0.424807
	ENSMUSG00000098620.2	Gm27209	0.401836	-0.223021	2.47887	0.164531	0.47308
	ENSMUSG00000102691.2	Gm37780	0.400975	0.354258	2.26167	0.145654	0.448175
	ENSMUSG00000116811.2	Gm16385	0.400895	0.0851972	0.830401	0.371216	0.672384
	ENSMUSG00000027939.12	Nup210l	0.400782	0.640248	3.33351	0.0803469	0.341052
	ENSMUSG00000095512.2	Gm17222	0.40074	-0.351622	2.80372	0.202748	0.517333
	ENSMUSG00000096579.2	Gm17121	0.40074	-0.351622	2.80372	0.202748	0.517333
	ENSMUSG00000105160.2	A530030E21Rik	0.400688	-0.129236	1.94201	0.176219	0.486147
	ENSMUSG00000083774.2	Gm7180	0.399638	0.30351	2.23057	0.148331	0.451171
	ENSMUSG00000074634.13	Tmem267	0.399423	2.68645	2.81073	0.106612	0.389317
	ENSMUSG00000021007.15	Spata7	0.39904	2.76797	7.88751	0.00973399	0.12967
	ENSMUSG00000112907.2	Gm47015	0.398885	2.41653	4.91118	0.0364127	0.240357
	ENSMUSG00000020562.8	Efcab10	0.398592	1.20108	4.75243	0.0392928	0.248286
	ENSMUSG00000031493.11	Ggn	0.398102	1.23626	4.28063	0.0494798	0.273933
	ENSMUSG00000068877.13	Selenbp2	0.397307	1.71702	4.25082	0.050217	0.275463
	ENSMUSG00000015619.11	Gata3	0.397222	3.9025	15.9585	0.000533628	0.0246664
	ENSMUSG00000014602.16	Kif1a	0.396942	3.13081	3.27669	0.0828067	0.345965
	ENSMUSG00000038791.15	Scgb3a2	0.396469	9.31846	7.5658	0.0111307	0.137096
	ENSMUSG00000087523.3	Gm12319	0.396395	1.51129	3.5716	0.0709098	0.321377
	ENSMUSG00000106237.2	Gm8066	0.396264	-0.314768	1.23342	0.277742	0.591814
	ENSMUSG00000079259.3	Trim71	0.396229	-0.210661	1.03802	0.318441	0.629327
	ENSMUSG00000112640.2	Gm32687	0.396151	2.71356	4.85983	0.0373176	0.243456
	ENSMUSG00000087028.8	Gm13387	0.395882	1.67765	3.848	0.0615013	0.300978
	ENSMUSG00000090319.3	Gm4462	0.39576	0.349237	2.52455	0.125171	0.419924
	ENSMUSG00000031517.9	Gpm6a	0.395711	5.67427	32.8261	6.64418e-06	0.00171896
	ENSMUSG00000094942.8	Gm3604	0.395596	0.925367	3.13928	0.0891218	0.35815
	ENSMUSG00000108852.2	Gm44911	0.395551	1.24139	4.93942	0.0359255	0.239329
	ENSMUSG00000022323.12	Rida	0.395365	3.35168	17.4418	0.000336972	0.0184261
	ENSMUSG00000021565.17	Slc6a19	0.395354	-0.354222	0.463683	0.502423	0.76836
	ENSMUSG00000070858.13	Gm1673	0.395278	0.302149	2.53238	0.124615	0.418539
	ENSMUSG00000115946.3	Mirt2	0.395153	0.0481024	1.6791	0.207365	0.521996
	ENSMUSG00000064109.9	Hcst	0.395095	1.31135	2.93808	0.0993978	0.376686
	ENSMUSG00000055323.7	Gm9967	0.394949	1.19042	2.81224	0.106522	0.38922
	ENSMUSG00000052496.6	Pkdrej	0.394904	0.12904	1.96383	0.1739	0.484098
	ENSMUSG00000063594.6	Gng8	0.394653	2.21478	7.18955	0.0130509	0.148832
	ENSMUSG00000032494.13	Tdgf1	0.39457	0.845688	2.57817	0.121422	0.414196
	ENSMUSG00000085929.3	Gm13421	0.394515	1.71565	5.21742	0.0314996	0.22479
	ENSMUSG00000115149.3	9330188P03Rik	0.394271	1.57486	3.59365	0.0701019	0.319457
	ENSMUSG00000035067.10	Xkr6	0.394189	2.56197	13.3076	0.00127531	0.04132
	ENSMUSG00000031383.9	Dusp9	0.393739	0.37153	2.94319	0.101534	0.38061
	ENSMUSG00000057816.8	Cfap299	0.39268	1.86453	4.66116	0.0410639	0.253616
	ENSMUSG00000121075.1	NA	0.392368	2.2863	11.2023	0.00268429	0.0642672
	ENSMUSG00000044522.9	A730020M07Rik	0.392232	-0.288256	1.41716	0.245511	0.562428
	ENSMUSG00000116958.2	Gm6705	0.391964	-0.295698	1.85883	0.18541	0.496816
	ENSMUSG00000036805.14	Noxa1	0.391836	1.30751	2.25574	0.14616	0.449022
	ENSMUSG00000102420.2	Gm37464	0.391734	1.48349	3.63993	0.06844	0.315516
	ENSMUSG00000054672.14	Scart2	0.391684	1.436	1.25644	0.273415	0.588645
	ENSMUSG00000117123.2	Gm49890	0.391103	0.953961	4.28414	0.0493936	0.27356
	ENSMUSG00000113622.2	Gm49749	0.390377	2.5838	5.81386	0.0239134	0.197959
	ENSMUSG00000113425.2	Gm48653	0.390063	1.0019	3.07239	0.0923955	0.364825
	ENSMUSG00000022358.8	Fbxo32	0.389659	4.53183	9.0618	0.00605462	0.100781
	ENSMUSG00000068762.12	Gstm6	0.389657	2.21562	2.90355	0.101296	0.380222
	ENSMUSG00000053552.15	Ebf4	0.389393	2.31921	9.33065	0.00544743	0.0953614
	ENSMUSG00000044937.16	Ttc41	0.389035	2.37592	13.6162	0.00114819	0.0390248
	ENSMUSG00000009145.7	Dqx1	0.389004	3.10666	10.8171	0.00309346	0.0703134
	ENSMUSG00000048794.15	Cfap100	0.388774	3.75784	7.07608	0.0136996	0.153009
	ENSMUSG00000032246.15	Calml4	0.388023	3.35805	4.06337	0.0551474	0.287145
	ENSMUSG00000114045.2	Gm34220	0.387906	1.24431	3.58636	0.0703676	0.319949
	ENSMUSG00000022253.18	Nadk2	0.387877	4.25982	19.7507	0.000170606	0.0116209
	ENSMUSG00000095041.8	NA	0.387392	8.55214	8.4444	0.00775	0.116178
	ENSMUSG00000061723.19	Tnnt3	0.387137	1.71863	0.330826	0.570525	0.811181
	ENSMUSG00000031027.16	Stk33	0.386838	3.43403	5.04283	0.0342027	0.234058
	ENSMUSG00000043807.7	Ly6g5b	0.386215	0.541109	1.68189	0.207001	0.521538
	ENSMUSG00000018427.9	Ypel2	0.386117	4.56908	11.6387	0.00229086	0.0589166
	ENSMUSG00000000903.4	Vpreb3	0.386014	3.87362	7.72255	0.0104244	0.13375
	ENSMUSG00000113581.3	Dio3os	0.385729	0.387281	2.30739	0.141821	0.441974
	ENSMUSG00000113898.2	Gm19144	0.384746	-0.263955	1.52908	0.228212	0.545707
	ENSMUSG00000029372.8	Ppbp	0.384581	2.7639	1.24526	0.275505	0.590839
	ENSMUSG00000090145.8	Ugt1a6b	0.384529	2.38786	1.73705	0.199952	0.51359
	ENSMUSG00000117869.2	NA	0.384528	1.58693	5.89275	0.0230721	0.19382
	ENSMUSG00000045709.13	Smkr-ps	0.384449	1.58115	3.32045	0.0809045	0.341837
	ENSMUSG00000032373.16	Car12	0.384397	0.938345	0.998692	0.327594	0.637778
	ENSMUSG00000100826.7	Snhg14	0.384219	1.28071	2.62487	0.118264	0.409065
	ENSMUSG00000036832.6	Lpar3	0.383813	4.58253	11.1549	0.00273132	0.0648915
	ENSMUSG00000067889.8	Sptbn2	0.383327	2.99556	12.2483	0.00184288	0.051697
	ENSMUSG00000068696.7	Gpr88	0.382954	1.62575	4.69696	0.0403588	0.251748
	ENSMUSG00000057246.17	BC051142	0.382766	0.768787	1.9178	0.178836	0.489412
	ENSMUSG00000121097.1	NA	0.382758	0.930751	1.24831	0.274932	0.590334
	ENSMUSG00000011154.18	Cfap161	0.382735	3.40635	6.71683	0.0160001	0.164223
	ENSMUSG00000071456.8	1110002L01Rik	0.382579	3.04838	5.52426	0.0273072	0.209351
	ENSMUSG00000015337.6	Endog	0.38257	3.92544	7.24565	0.0127427	0.147353
	ENSMUSG00000046807.11	Lrrc75b	0.38188	1.11144	2.04423	0.165671	0.473993
	ENSMUSG00000032224.16	Fam81a	0.381718	3.03768	5.67785	0.025445	0.203349
	ENSMUSG00000120315.1	NA	0.38124	0.468767	3.18616	0.0869069	0.353546
	ENSMUSG00000050520.5	Cldn8	0.380711	1.94251	5.03732	0.0342921	0.234348
	ENSMUSG00000029135.11	Fosl2	0.380692	6.48796	39.8788	1.57656e-06	0.000722081
	ENSMUSG00000038725.14	Pkhd1l1	0.380573	4.07057	11.2545	0.00263362	0.0634925
	ENSMUSG00000060487.8	Samd5	0.379943	4.3491	15.9693	0.000531795	0.0246474
	ENSMUSG00000050359.8	Sprr1a	0.379942	1.77504	0.206371	0.653708	0.855327
	ENSMUSG00000104548.2	Gm43857	0.378532	2.71506	6.45435	0.0179507	0.173057
	ENSMUSG00000118119.2	Gm9937	0.377741	-0.119873	1.1605	0.292069	0.605951
	ENSMUSG00000111167.3	Gm39321	0.377389	-0.0740238	1.36251	0.254567	0.571959
	ENSMUSG00000079434.9	Neu2	0.377314	1.07944	2.56934	0.12203	0.414665
	ENSMUSG00000034156.17	Tspoap1	0.376919	3.49172	5.07302	0.0337173	0.232105
	ENSMUSG00000021697.13	Depdc1b	0.376708	0.462517	1.28837	0.267555	0.584393
	ENSMUSG00000038068.16	Rnf144b	0.376283	5.45292	37.2383	2.64739e-06	0.00101542
	ENSMUSG00000038304.15	Cd160	0.376075	0.64858	1.6572	0.210254	0.525454
	ENSMUSG00000031937.8	Vstm5	0.375922	0.780888	1.69183	0.205708	0.520621
	ENSMUSG00000095794.3	Igkv6-17	0.375601	-0.00108951	0.512987	0.480759	0.754706
	ENSMUSG00000060981.8	H4c8	0.375455	0.744432	3.41849	0.0768224	0.332743
	ENSMUSG00000027579.7	Srms	0.375439	2.35095	5.48739	0.0277765	0.21136
	ENSMUSG00000045007.10	Tubg2	0.375315	1.46341	3.86587	0.0609437	0.299943
	ENSMUSG00000006345.11	Ggt1	0.374212	1.62189	1.94392	0.176014	0.485948
	ENSMUSG00000031870.17	Pgr	0.373878	1.73124	2.44577	0.130929	0.428597
	ENSMUSG00000034758.13	Tle6	0.373852	3.56338	15.8968	0.000544139	0.0248868
	ENSMUSG00000031880.8	Rrad	0.373667	3.68773	10.4187	0.00358947	0.0763433
	ENSMUSG00000021127.8	Zfp36l1	0.3735	8.38296	16.1188	0.000507298	0.024026
	ENSMUSG00000120883.1	NA	0.373314	0.45547	2.10402	0.159854	0.467585
	ENSMUSG00000075225.16	Ccdc162	0.373233	4.02416	7.62051	0.0108783	0.135982
	ENSMUSG00000093507.2	Gm20627	0.372423	0.27212	2.88542	0.106794	0.389801
	ENSMUSG00000021221.16	Dpf3	0.372218	-0.244196	1.69424	0.205396	0.520212
	ENSMUSG00000071540.5	3425401B19Rik	0.371906	1.72586	2.10126	0.160117	0.467918
	ENSMUSG00000086894.3	Gm15708	0.371677	1.33329	3.64563	0.0682383	0.315257
	ENSMUSG00000086851.2	A430108G06Rik	0.371528	0.704223	2.85517	0.104027	0.384575
	ENSMUSG00000014158.13	Trpv4	0.37126	3.67785	2.81078	0.106609	0.389317
	ENSMUSG00000004473.11	Clec11a	0.371122	3.61502	4.98477	0.0351583	0.236843
	ENSMUSG00000100707.2	Gm28523	0.370977	2.08769	5.80299	0.0240319	0.198087
	ENSMUSG00000021719.10	Rgs7bp	0.370506	1.97048	9.27653	0.00556406	0.0966408
	ENSMUSG00000050138.9	Kcnk12	0.370022	1.79218	3.77685	0.0637798	0.305574
	ENSMUSG00000073940.4	Hbb-bt	0.370006	8.52395	1.61497	0.215972	0.531651
	ENSMUSG00000024039.16	Cbs	0.369972	2.67064	5.62484	0.0260713	0.205881
	ENSMUSG00000033114.12	Slc35d2	0.369709	3.06698	12.9503	0.00144195	0.0447935
	ENSMUSG00000040287.10	Stac3	0.369428	0.475835	1.57601	0.221419	0.537848
	ENSMUSG00000104420.2	E230020A03Rik	0.36856	0.211921	1.49566	0.233211	0.551348
	ENSMUSG00000064179.14	Tnnt1	0.368343	0.678448	4.30544	0.0635156	0.304896
	ENSMUSG00000086914.3	Gm16124	0.367875	1.56902	6.21492	0.0199614	0.181443
	ENSMUSG00000073791.14	Efcab7	0.367842	1.6031	7.23697	0.0127899	0.147505
	ENSMUSG00000031736.13	Crnde	0.36767	3.41666	13.9357	0.001031	0.0366547
	ENSMUSG00000078185.4	Chml	0.367348	2.93852	5.76412	0.0244613	0.19982
	ENSMUSG00000053093.17	Myh7	0.367249	4.15303	6.0453	0.0215369	0.187969
	ENSMUSG00000029431.6	B3gnt4	0.367247	1.78758	3.25036	0.0839757	0.348488
	ENSMUSG00000111933.2	Gm36660	0.367072	1.13419	5.44265	0.0283581	0.212888
	ENSMUSG00000069170.15	Adgrv1	0.366731	0.495237	2.52453	0.125173	0.419924
	ENSMUSG00000052974.9	Cyp2f2	0.366534	11.1283	6.76934	0.0156387	0.16213
	ENSMUSG00000073062.4	Zxdb	0.366394	4.15453	8.91682	0.00641258	0.103884
	ENSMUSG00000073424.10	Cyp4f15	0.366248	2.7683	9.40476	0.00529202	0.093604
	ENSMUSG00000006435.17	Neurl1a	0.366238	3.25856	6.51629	0.0174677	0.170421
	ENSMUSG00000079845.9	Xlr4a	0.365937	1.34223	0.268271	0.609235	0.831765
	ENSMUSG00000027938.12	Creb3l4	0.365915	1.39942	4.07093	0.0549383	0.286751
	ENSMUSG00000030757.14	Zkscan2	0.365455	0.554171	1.6969	0.205052	0.520024
	ENSMUSG00000035834.12	Polr3g	0.36502	2.21928	3.34704	0.0797735	0.339753
	ENSMUSG00000026650.16	Meig1	0.364407	2.08007	3.35593	0.0793993	0.338965
	ENSMUSG00000049404.8	Rarres1	0.364368	0.390078	1.43827	0.242123	0.559621
	ENSMUSG00000081519.2	Gm13331	0.364308	0.784621	2.07609	0.16254	0.470321
	ENSMUSG00000067714.15	Lpar5	0.36421	0.665964	1.34978	0.256738	0.574677
	ENSMUSG00000087626.2	Gm15050	0.36416	0.00566859	1.56537	0.222936	0.539491
	ENSMUSG00000064280.15	Ccdc146	0.364159	3.83982	7.00401	0.0141301	0.153659
	ENSMUSG00000026390.8	Marco	0.364004	3.66663	2.67417	0.115034	0.403735
	ENSMUSG00000105881.3	4932422M17Rik	0.363698	3.76082	10.1353	0.00399514	0.0803461
	ENSMUSG00000055629.6	B4galnt4	0.363462	-0.169902	0.680815	0.41743	0.709385
	ENSMUSG00000028730.15	Cfap57	0.363078	3.43954	9.4003	0.00530122	0.0936712
	ENSMUSG00000109498.2	Gm45222	0.36277	0.300465	1.13533	0.297242	0.610328
	ENSMUSG00000084862.2	Gm16278	0.362333	0.34073	1.77165	0.195681	0.507994
	ENSMUSG00000031377.12	Bmx	0.362193	3.31838	9.99936	0.00420735	0.0828752
	ENSMUSG00000116656.2	Gm49708	0.362114	2.7443	5.77065	0.0243886	0.199694
	ENSMUSG00000078776.10	9530053A07Rik	0.36189	1.53538	2.29765	0.142627	0.443398
	ENSMUSG00000085235.2	Gm12576	0.361812	-0.332523	0.964437	0.335866	0.644372
	ENSMUSG00000037573.6	Tob1	0.361533	5.63173	27.7279	2.12162e-05	0.00322598
	ENSMUSG00000102758.4	Naaladl2	0.361474	1.1115	2.6862	0.114262	0.40238
	ENSMUSG00000062931.16	Zfp938	0.361416	2.81961	13.2926	0.00128184	0.0414543
	ENSMUSG00000105895.2	Gm42829	0.36114	0.776971	2.09078	0.16112	0.469231
	ENSMUSG00000101337.7	Dnah7c	0.361064	2.63963	2.98667	0.0967958	0.372361
	ENSMUSG00000049709.5	Nlrp10	0.360801	0.98077	1.87275	0.183831	0.49507
	ENSMUSG00000033972.10	Zfp944	0.360451	3.44566	10.0027	0.00420198	0.0828752
	ENSMUSG00000043015.16	Nemp2	0.360432	3.94524	17.8391	0.00029886	0.0169341
	ENSMUSG00000062044.17	Lmtk3	0.36014	0.156389	1.11276	0.301984	0.615101
	ENSMUSG00000024517.18	Grp	0.359688	1.26518	1.332	0.25981	0.578373
	ENSMUSG00000064357.1	mt-Atp6	0.35956	7.19267	1.54941	0.225237	0.541787
	ENSMUSG00000054074.10	Skida1	0.359474	2.66177	7.8924	0.0097143	0.12967
	ENSMUSG00000086515.3	Erich2os	0.359361	0.332596	2.32594	0.1403	0.441212
	ENSMUSG00000073650.10	Catip	0.359269	3.78236	8.09434	0.00893847	0.12465
	ENSMUSG00000028687.18	Mutyh	0.359127	1.92353	4.40704	0.0464858	0.266639
	ENSMUSG00000020096.22	Tbata	0.358945	1.72049	1.25658	0.273388	0.588645
	ENSMUSG00000048600.8	Gm5763	0.3588	2.76453	8.34639	0.00806422	0.118704
	ENSMUSG00000097184.4	4632428C04Rik	0.358129	3.19589	10.33	0.00371144	0.0779112
	ENSMUSG00000028188.14	Spata1	0.358067	0.822617	2.26162	0.145658	0.448175
	ENSMUSG00000116594.2	NA	0.358043	1.40795	1.27415	0.270144	0.585647
	ENSMUSG00000054545.18	Ugt1a6a	0.357681	6.23091	2.68052	0.114626	0.403109
	ENSMUSG00000107134.2	Gm42528	0.35725	3.54317	8.69794	0.00699778	0.108984
	ENSMUSG00000073988.14	Ttpa	0.356559	1.75466	3.64998	0.068085	0.3148
	ENSMUSG00000098715.7	Gm28053	0.356543	0.665712	1.62843	0.214129	0.530169
	ENSMUSG00000117729.2	Gm5242	0.356521	-0.371205	1.44851	0.240502	0.558266
	ENSMUSG00000040938.17	Slc16a11	0.356409	5.92562	6.4938	0.0176414	0.171078
	ENSMUSG00000050069.4	Grem2	0.355934	6.66006	22.9296	7.10545e-05	0.00682553
	ENSMUSG00000034245.11	Hdac11	0.355872	4.31238	7.96355	0.0094328	0.12787
	ENSMUSG00000045915.16	Ccdc42	0.355487	1.74586	4.67558	0.0407782	0.252734
	ENSMUSG00000049092.12	Gpr137c	0.355281	1.97084	4.32605	0.0483797	0.271317
	ENSMUSG00000042367.13	Gjb3	0.354357	0.938556	3.08272	0.0918812	0.363297
	ENSMUSG00000090963.3	Gm17655	0.354343	0.950049	2.72898	0.111564	0.397338
	ENSMUSG00000112734.2	Gm47644	0.354312	0.478984	0.417207	0.524461	0.783795
	ENSMUSG00000045625.6	Pigz	0.353166	1.54547	3.53727	0.072189	0.323172
	ENSMUSG00000018209.16	Stk4	0.352981	6.98552	20.0656	0.000155956	0.0107967
	ENSMUSG00000118053.2	Gm50244	0.352811	0.593021	3.44841	0.0805141	0.341403
	ENSMUSG00000032841.16	Prr5l	0.352692	5.23645	12.868	0.00148359	0.0457803
	ENSMUSG00000032118.17	Fez1	0.352688	1.27115	2.72478	0.111825	0.397943
	ENSMUSG00000087672.2	Gm15122	0.352446	0.572277	1.67331	0.208125	0.522832
	ENSMUSG00000087433.3	Gm14167	0.352377	-0.243401	1.44682	0.240768	0.558371
	ENSMUSG00000006586.16	Runx1t1	0.352141	2.69854	7.93491	0.00954503	0.128657
	ENSMUSG00000055003.15	Lrtm2	0.35194	4.73562	10.7672	0.00315125	0.0711463
	ENSMUSG00000104623.2	Gm6394	0.351901	1.99045	5.93113	0.0226747	0.192762
	ENSMUSG00000078122.6	F630028O10Rik	0.351658	2.56556	2.94953	0.0987774	0.375484
	ENSMUSG00000050295.5	Foxc1	0.351342	2.23282	3.67657	0.0671558	0.313395
	ENSMUSG00000113427.2	Gm46378	0.351269	0.119931	1.21438	0.281392	0.595488
	ENSMUSG00000052131.8	Akr1b7	0.351202	0.942558	2.59122	0.12053	0.412675
	ENSMUSG00000029477.15	Morn3	0.350877	1.9116	3.54756	0.0718028	0.3231
	ENSMUSG00000026077.16	Npas2	0.350871	3.62991	2.57202	0.121846	0.414492
	ENSMUSG00000078889.12	Gm14288	0.350656	2.03272	5.01579	0.0346441	0.235775
	ENSMUSG00000051113.10	Garin5a	0.350621	0.668847	1.61935	0.21537	0.53142
	ENSMUSG00000045349.16	Sh2d5	0.350566	0.0997977	2.26209	0.150778	0.454932
	ENSMUSG00000059493.14	Nhs	0.350565	0.444241	2.23589	0.147869	0.450872
	ENSMUSG00000005131.5	4930550C14Rik	0.350563	1.2969	3.49575	0.0737711	0.326758
	ENSMUSG00000046916.10	Myct1	0.350527	6.29716	17.6487	0.000316508	0.0175844
	ENSMUSG00000039323.19	Igfbp2	0.350515	7.52042	5.46525	0.0280626	0.21214
	ENSMUSG00000096967.4	Gm26621	0.350447	2.37801	4.07724	0.0547646	0.286506
	ENSMUSG00000028591.12	Pramel13	0.350447	0.0308596	1.00703	0.325623	0.635481
	ENSMUSG00000021070.7	Bdkrb2	0.350324	3.80355	1.46692	0.23762	0.555407
	ENSMUSG00000035964.9	Tmem59l	0.350285	2.95607	4.64351	0.0414166	0.254924
	ENSMUSG00000120675.1	NA	0.350259	0.33495	2.3529	0.150765	0.454932
	ENSMUSG00000087060.9	Eldr	0.350219	0.0427497	1.87137	0.210217	0.525437
	ENSMUSG00000021379.3	Id4	0.349979	3.44006	6.03095	0.0216763	0.188623
	ENSMUSG00000074217.9	Misp3	0.349678	3.81477	14.438	0.000872275	0.0336
	ENSMUSG00000074867.5	Zfp808	0.349439	1.65373	1.9626	0.17403	0.484134
	ENSMUSG00000085401.3	Slc39a1-ps	0.349329	0.576836	2.4346	0.131771	0.429232
	ENSMUSG00000045048.8	Gm9795	0.349209	-0.364749	1.12416	0.299576	0.613088
	ENSMUSG00000087590.4	Epb41l4aos	0.349007	2.44958	7.22975	0.0128292	0.147664
	ENSMUSG00000090336.6	Cfap97d2	0.348328	1.1763	1.78547	0.194007	0.505847
	ENSMUSG00000030494.14	Rhpn2	0.348316	4.35712	22.4437	8.08931e-05	0.00726529
	ENSMUSG00000085890.9	Tnfsf13os	0.348166	1.66758	4.09206	0.0543585	0.285467
	ENSMUSG00000049971.18	Glt1d1	0.347983	1.22479	2.97434	0.0974488	0.373877
	ENSMUSG00000017639.14	Rab11fip4	0.347905	3.96942	8.53841	0.00746119	0.113549
	ENSMUSG00000121226.1	NA	0.347823	1.25339	1.96353	0.173932	0.484098
	ENSMUSG00000056752.17	Dnah9	0.347801	4.33526	7.78989	0.0101362	0.131994
	ENSMUSG00000042453.15	Reln	0.346563	3.05025	13.627	0.001144	0.0389588
	ENSMUSG00000120538.1	NA	0.34637	-0.082827	1.42352	0.244483	0.561797
	ENSMUSG00000108655.2	Gm44949	0.346114	1.33779	3.53874	0.0721336	0.323172
	ENSMUSG00000111792.2	Gm33858	0.346077	-0.184327	0.979382	0.332222	0.641427
	ENSMUSG00000038020.6	Rapgefl1	0.346063	2.26122	1.7079	0.203638	0.518186
	ENSMUSG00000074491.10	Clec4g	0.345726	0.849974	1.13731	0.296829	0.609841
	ENSMUSG00000032064.18	Dixdc1	0.345723	4.86527	10.4273	0.00357792	0.0761913
	ENSMUSG00000103966.2	Gm37120	0.345601	-0.210084	0.833967	0.370209	0.671952
	ENSMUSG00000059900.15	Tmem40	0.345584	0.257314	0.428596	0.518902	0.779888
	ENSMUSG00000085180.2	AI838599	0.34536	3.02961	4.77987	0.0387773	0.247029
	ENSMUSG00000073414.9	Mpig6b	0.345198	1.17241	3.19999	0.0862656	0.352914
	ENSMUSG00000073293.5	Nudt10	0.34489	0.190694	2.21621	0.153461	0.458636
	ENSMUSG00000105403.2	Gm43618	0.344818	0.464165	1.73849	0.199772	0.51359
	ENSMUSG00000024186.16	Rgs11	0.344737	5.18061	25.329	3.82226e-05	0.00460105
	ENSMUSG00000051379.13	Flrt3	0.344651	6.00945	7.99109	0.00932627	0.127695
	ENSMUSG00000112082.3	Gm35035	0.344401	-0.270037	0.980465	0.33196	0.641278
	ENSMUSG00000063239.18	Grm4	0.344193	1.41094	1.14032	0.296205	0.609186
	ENSMUSG00000073792.12	Alg6	0.344036	3.3349	10.7654	0.0031534	0.0711463
	ENSMUSG00000039384.9	Dusp10	0.343897	3.58352	8.55303	0.00741735	0.11308
	ENSMUSG00000097587.4	4930578M01Rik	0.343549	-0.117324	1.36336	0.254422	0.571863
	ENSMUSG00000043372.13	Hexim2	0.343448	1.5966	4.81498	0.0381286	0.24559
	ENSMUSG00000018924.7	Alox15	0.343195	2.621	0.256994	0.616818	0.835633
	ENSMUSG00000018581.16	Dnah11	0.342647	3.70808	7.69499	0.0105449	0.134698
	ENSMUSG00000095253.5	Zfp799	0.342577	3.1387	10.5092	0.00346965	0.0749912
	ENSMUSG00000021236.17	Entpd5	0.341991	5.64491	4.29266	0.0491857	0.273177
	ENSMUSG00000050473.6	Slc35d3	0.341846	0.223471	1.38923	0.250086	0.567185
	ENSMUSG00000097924.3	A730020E08Rik	0.341717	0.843062	2.14356	0.156141	0.462745
	ENSMUSG00000030359.15	Pzp	0.341706	-0.326554	1.49209	0.24565	0.562644
	ENSMUSG00000094694.7	Ighv1-9	0.341161	-0.336049	0.326036	0.573309	0.812972
	ENSMUSG00000099655.3	2310034G01Rik	0.341092	2.19216	4.22036	0.0509831	0.276543
	ENSMUSG00000097891.2	Gm3650	0.340877	1.9137	4.5294	0.0437807	0.260117
	ENSMUSG00000085743.2	8430419K02Rik	0.340858	-0.246972	0.966437	0.335375	0.643857
	ENSMUSG00000064125.15	Prr36	0.340742	2.41738	5.7561	0.0245509	0.199984
	ENSMUSG00000085189.3	Gm11963	0.340732	0.218406	1.61665	0.21574	0.531651
	ENSMUSG00000054422.8	Fabp1	0.340323	2.19032	2.94776	0.0988733	0.375604
	ENSMUSG00000074361.12	C5ar2	0.340305	2.36189	3.65952	0.0677501	0.314426
	ENSMUSG00000111904.2	Gm2395	0.340055	-0.249335	0.631159	0.434714	0.723768
	ENSMUSG00000028696.13	Ipp	0.339998	2.5627	5.95377	0.0224438	0.19171
	ENSMUSG00000006638.17	Abhd1	0.339886	1.27227	2.2694	0.144997	0.44706
	ENSMUSG00000023882.16	Zfp54	0.339499	2.82322	8.2522	0.00837942	0.120839
	ENSMUSG00000059463.8	Spag11b	0.339491	-0.013144	0.791473	0.382483	0.681703
	ENSMUSG00000035456.10	Prdm8	0.339359	2.27053	0.726979	0.402291	0.696853
	ENSMUSG00000010492.11	Uckl1os	0.339329	3.41425	4.70118	0.0402764	0.251405
	ENSMUSG00000087623.2	Gm12404	0.338606	0.547345	2.41508	0.133257	0.431396
	ENSMUSG00000053040.14	Aph1c	0.338377	3.77346	16.4119	0.000462757	0.0226594
	ENSMUSG00000032417.11	Rwdd2a	0.338182	0.89696	2.19332	0.151617	0.456265
	ENSMUSG00000111291.2	Gm48604	0.33796	2.46135	9.19194	0.00575192	0.0983272
	ENSMUSG00000113440.2	Gm46404	0.337664	1.33298	2.66404	0.115689	0.40504
	ENSMUSG00000101320.2	Gm28529	0.337518	0.89641	2.19201	0.151734	0.456265
	ENSMUSG00000103436.2	Gm36995	0.337346	2.45107	3.54114	0.0720435	0.3231
	ENSMUSG00000022847.16	Thpo	0.337337	0.0740984	1.14969	0.294275	0.607909
	ENSMUSG00000096995.4	2810029C07Rik	0.337191	1.3149	2.10556	0.159707	0.467336
	ENSMUSG00000074194.5	Zfp791	0.3371	1.73755	5.45094	0.0282493	0.212393
	ENSMUSG00000000126.12	Wnt9a	0.336541	3.81464	7.45339	0.0116695	0.140277
	ENSMUSG00000064141.15	Zfp69	0.33617	2.15311	3.31248	0.0812475	0.342597
	ENSMUSG00000078495.11	Zfp984	0.336165	4.3425	3.7114	0.0659606	0.311288
	ENSMUSG00000042275.10	Pelo	0.335757	4.7249	11.3535	0.00254025	0.0624863
	ENSMUSG00000050765.4	Gm5084	0.335716	0.463499	1.74108	0.199448	0.513477
	ENSMUSG00000048442.16	Smim5	0.335204	3.62561	7.19007	0.013048	0.148832
	ENSMUSG00000072980.4	Oip5	0.33494	0.140031	1.83139	0.211623	0.526747
	ENSMUSG00000036718.18	Micall2	0.334913	3.31783	6.3005	0.0192154	0.178464
	ENSMUSG00000038508.8	Gdf15	0.334756	1.27403	1.27509	0.269972	0.585647
	ENSMUSG00000081810.2	Gm11878	0.334291	2.0098	2.49834	0.127053	0.422744
	ENSMUSG00000087497.9	2810001G20Rik	0.334223	2.65132	9.60496	0.00489597	0.090092
	ENSMUSG00000095366.3	Gm21860	0.333977	2.55192	1.55066	0.225056	0.541707
	ENSMUSG00000037418.7	Best1	0.333938	1.86636	2.12481	0.157889	0.464823
	ENSMUSG00000036306.14	Lzts1	0.333856	3.01129	5.92283	0.02276	0.193298
	ENSMUSG00000097339.6	Gm26671	0.333626	1.1005	4.49058	0.0735001	0.326429
	ENSMUSG00000110444.3	Gm10033	0.333557	3.66772	12.0605	0.00196974	0.0536004
	ENSMUSG00000082152.2	Gm13655	0.332957	0.000430971	0.850353	0.365628	0.668614
	ENSMUSG00000091586.3	Cyp4f17	0.332894	3.43832	10.8157	0.00309502	0.0703134
	ENSMUSG00000005628.13	Tmod4	0.332846	0.425011	1.4109	0.246527	0.563388
	ENSMUSG00000057729.13	Prtn3	0.332797	-0.282576	0.900314	0.352152	0.65821
	ENSMUSG00000075304.3	Sp5	0.332789	1.89684	3.85482	0.0612879	0.300613
	ENSMUSG00000001948.11	Spa17	0.332617	2.77688	3.34908	0.0796876	0.339554
	ENSMUSG00000021294.8	Kif26a	0.332441	5.67126	7.70014	0.0105222	0.134508
	ENSMUSG00000037818.17	Abhd18	0.332114	3.06459	12.5135	0.00167864	0.0494017
	ENSMUSG00000038751.6	Ptk6	0.332091	-0.056985	1.12444	0.299516	0.613088
	ENSMUSG00000020877.12	Scrn2	0.331922	3.41708	16.5282	0.000446272	0.022229
	ENSMUSG00000104208.2	Gm37401	0.331891	4.14896	2.37725	0.136194	0.435168
	ENSMUSG00000028295.15	Smim8	0.331792	2.74241	9.09965	0.00596482	0.100417
	ENSMUSG00000075555.14	Gm10863	0.331777	-0.17075	0.950626	0.339283	0.64728
	ENSMUSG00000073565.6	Prr16	0.331664	1.80531	4.62311	0.0418286	0.256204
	ENSMUSG00000045455.10	Gm9797	0.331484	1.49273	0.703792	0.409789	0.703992
	ENSMUSG00000043795.11	Prr33	0.331448	3.4124	5.18838	0.0319321	0.226123
	ENSMUSG00000048520.17	Fbxl13	0.331162	1.95055	2.91933	0.100424	0.378744
	ENSMUSG00000101693.2	Gm19461	0.330736	2.5089	5.95209	0.0224608	0.19171
	ENSMUSG00000040364.9	Sec1	0.330736	1.36013	1.24092	0.276323	0.59115
	ENSMUSG00000030322.13	Mbd4	0.330462	2.90878	9.5299	0.00504052	0.0911934
	ENSMUSG00000043501.6	Lgals2	0.330414	1.00363	2.81974	0.106082	0.38845
	ENSMUSG00000059897.6	Zfp930	0.330222	3.79035	11.6056	0.0023184	0.0591339
	ENSMUSG00000038347.16	Tcte2	0.330106	1.73924	3.91095	0.0595621	0.296852
	ENSMUSG00000100594.3	2810414N06Rik	0.329958	0.797711	2.31306	0.141354	0.44179
	ENSMUSG00000097448.2	Platr22	0.329735	1.22706	1.61986	0.2153	0.531387
	ENSMUSG00000044772.3	Sntn	0.329558	3.59039	6.33267	0.018943	0.177108
	ENSMUSG00000021367.9	Edn1	0.329504	5.25857	3.17251	0.0875454	0.354701
	ENSMUSG00000115100.2	Gm34934	0.329375	2.1714	5.83751	0.0236576	0.196784
	ENSMUSG00000030519.15	Apba2	0.328944	0.757204	1.75504	0.197717	0.511513
	ENSMUSG00000107879.3	9330102E08Rik	0.328384	0.0900772	1.09761	0.305225	0.617747
	ENSMUSG00000104324.2	Gm37320	0.328113	0.740462	1.43392	0.242816	0.560345
	ENSMUSG00000097657.3	Gm7389	0.328111	0.736537	2.88086	0.102567	0.382414
	ENSMUSG00000085171.9	D830026I12Rik	0.327955	3.42367	5.6059	0.0262992	0.206557
	ENSMUSG00000086843.4	E030013I19Rik	0.327645	2.94124	9.06349	0.0060506	0.100781
	ENSMUSG00000094626.2	Tmem121b	0.3272	2.44232	4.82385	0.0379667	0.244834
	ENSMUSG00000109610.2	Gm7432	0.326997	1.91479	1.11644	0.301203	0.614749
	ENSMUSG00000063130.5	Calml3	0.326544	2.94101	0.255026	0.618162	0.836539
	ENSMUSG00000052605.13	Isoc2b	0.32646	2.91125	8.16523	0.0086825	0.122459
	ENSMUSG00000112964.3	E430024I08Rik	0.325366	3.67839	11.1484	0.00273781	0.0648915
	ENSMUSG00000086753.2	Gm15751	0.325073	2.1911	5.89213	0.0230786	0.19382
	ENSMUSG00000032491.15	Nradd	0.324828	3.70279	16.4785	0.000453232	0.0224467
	ENSMUSG00000120686.1	NA	0.324576	0.924509	1.98246	0.171949	0.481591
	ENSMUSG00000120082.1	NA	0.324476	2.74099	3.53143	0.0724092	0.32352
	ENSMUSG00000051627.4	H1f4	0.323876	0.285076	1.07662	0.309793	0.620805
	ENSMUSG00000022659.14	Gcsam	0.323786	1.27038	2.00802	0.169317	0.478782
	ENSMUSG00000006777.8	Krt23	0.323631	4.15021	12.38	0.00175923	0.0508241
	ENSMUSG00000030302.18	Atp2b2	0.323506	2.72011	5.5644	0.0268064	0.207683
	ENSMUSG00000045876.5	Pcdhb8	0.323358	0.93815	1.27688	0.269644	0.585569
	ENSMUSG00000025738.9	Fbxl16	0.32318	2.94347	4.46921	0.0450887	0.263865
	ENSMUSG00000118281.2	Gm50242	0.323142	0.352441	1.04928	0.315885	0.627097
	ENSMUSG00000095648.8	Gm2004	0.323097	-0.357407	1.24109	0.276291	0.59115
	ENSMUSG00000097993.9	Ptprv	0.32283	0.714963	1.08349	0.308287	0.619755
	ENSMUSG00000102704.2	Gm38309	0.322557	0.686507	2.8769	0.10279	0.3826
	ENSMUSG00000034910.6	Pygo1	0.322306	3.77012	12.3458	0.00178057	0.0511847
	ENSMUSG00000058488.8	Kl	0.322105	-0.0489188	1.51237	0.230694	0.548012
	ENSMUSG00000060149.9	BC002059	0.322081	3.46514	9.78262	0.00457158	0.0864163
	ENSMUSG00000104168.3	Gm38250	0.321999	0.30951	2.34905	0.13962	0.440147
	ENSMUSG00000050395.10	Tnfsf15	0.321937	1.99614	5.2427	0.0311283	0.223285
	ENSMUSG00000085042.10	Abhd11os	0.321911	1.45075	1.78288	0.19432	0.506212
	ENSMUSG00000056459.15	Zbtb25	0.321646	2.86962	7.47191	0.0115788	0.139655
	ENSMUSG00000024027.9	Glp1r	0.321458	7.6865	18.2112	0.000267384	0.0157341
	ENSMUSG00000044349.17	Snhg11	0.321367	5.80067	8.05707	0.0090764	0.125864
	ENSMUSG00000030031.15	Kbtbd8	0.320784	1.53073	1.95509	0.174825	0.484971
	ENSMUSG00000066407.4	Gm10263	0.320709	1.79369	2.85659	0.103946	0.384506
	ENSMUSG00000043872.15	Zmym1	0.320631	3.61634	6.55148	0.0171998	0.169495
	ENSMUSG00000017418.15	Arl5b	0.320465	5.27337	14.3222	0.000906335	0.0344527
	ENSMUSG00000109998.2	Gm45437	0.320432	0.920104	1.27692	0.269636	0.585569
	ENSMUSG00000030960.17	Eef1akmt2	0.320169	3.1897	9.2795	0.0055576	0.0966408
	ENSMUSG00000044835.16	Ankrd45	0.319949	2.87464	3.04601	0.0937245	0.366669
	ENSMUSG00000066178.5	6030445D17Rik	0.319871	0.102817	1.51679	0.230033	0.547399
	ENSMUSG00000071302.11	2610044O15Rik8	0.319859	3.63322	9.27888	0.00555896	0.0966408
	ENSMUSG00000025069.16	Gsto2	0.319639	0.115127	0.896566	0.353138	0.658597
	ENSMUSG00000026611.18	Spata17	0.319553	1.2466	2.08697	0.161487	0.469597
	ENSMUSG00000097819.2	Gm26813	0.31946	0.353636	1.30512	0.264547	0.581354
	ENSMUSG00000098176.3	Ccdc166	0.319427	2.71785	6.84638	0.0151247	0.159763
	ENSMUSG00000052302.7	Tbc1d30	0.319192	5.37036	30.4491	1.12556e-05	0.00250133
	ENSMUSG00000043629.13	1700019D03Rik	0.319185	0.725035	1.44513	0.241034	0.558613
	ENSMUSG00000041460.17	Cacna2d4	0.31916	3.43064	7.91903	0.00960788	0.129183
	ENSMUSG00000076508.4	Igkv17-127	0.318807	0.0457293	0.420239	0.522971	0.78283
	ENSMUSG00000020799.17	Tekt1	0.318516	3.92624	3.77502	0.0638398	0.305657
	ENSMUSG00000058748.10	Zfp958	0.318016	2.72982	7.09567	0.0135851	0.15222
	ENSMUSG00000097571.11	Jpx	0.317881	2.09565	5.43694	0.0284332	0.213007
	ENSMUSG00000032773.10	Chrm1	0.317648	0.753015	1.19453	0.285264	0.598829
	ENSMUSG00000078779.5	Zfp59	0.317491	3.07696	9.57999	0.00494353	0.0906785
	ENSMUSG00000055370.4	Gm9968	0.317482	-0.293239	0.730697	0.401108	0.695888
	ENSMUSG00000018648.16	Dusp14	0.317446	5.27015	32.8929	6.54875e-06	0.00171896
	ENSMUSG00000100876.2	2810454H06Rik	0.31736	-0.124932	0.97622	0.332988	0.642191
	ENSMUSG00000027551.16	Zfp64	0.317	4.25758	14.2141	0.000939469	0.0349458
	ENSMUSG00000042549.12	Map2k3os	0.316861	1.0443	1.84171	0.187374	0.499222
	ENSMUSG00000078607.7	1810010H24Rik	0.31686	5.578	15.7259	0.000574498	0.0257988
	ENSMUSG00000035566.8	Pcdh17	0.316456	5.131	3.13864	0.0891522	0.35815
	ENSMUSG00000073413.10	Ly6g6d	0.316442	1.6913	3.80616	0.0628297	0.30413
	ENSMUSG00000029403.15	Cdkl2	0.316425	4.61072	16.0228	0.000522889	0.0244025
	ENSMUSG00000064158.7	Izumo1	0.316259	1.45363	2.95625	0.0984158	0.375014
	ENSMUSG00000028251.6	Tstd3	0.31623	2.94895	5.53997	0.02711	0.209041
	ENSMUSG00000050855.17	Zfp940	0.316098	1.71789	2.28678	0.143534	0.444866
	ENSMUSG00000058883.17	Zfp708	0.316071	1.55696	1.20501	0.28321	0.596911
	ENSMUSG00000035459.19	Stab2	0.315948	1.38816	2.13347	0.157079	0.46393
	ENSMUSG00000047786.13	Lix1	0.315791	1.16025	2.37265	0.136556	0.435603
	ENSMUSG00000021913.9	Ogdhl	0.315753	-0.372492	0.748965	0.39537	0.691768
	ENSMUSG00000074203.5	G430095P16Rik	0.315665	0.559871	2.5739	0.137417	0.437063
	ENSMUSG00000032579.15	Hemk1	0.315357	3.10178	12.4002	0.00174676	0.0505482
	ENSMUSG00000096795.5	Zfp433	0.315145	2.3045	2.26566	0.145314	0.447482
	ENSMUSG00000060224.5	Pyroxd2	0.314866	2.7524	4.55207	0.0432992	0.25897
	ENSMUSG00000046934.6	Csl	0.314846	-0.269496	0.898147	0.352722	0.658419
	ENSMUSG00000032802.9	Srxn1	0.314799	5.24967	4.05291	0.0554384	0.287846
	ENSMUSG00000071532.7	Gm10335	0.31477	4.54378	0.194323	0.663287	0.860263
	ENSMUSG00000074158.10	Zfp976	0.314744	3.4455	7.18153	0.0130956	0.149048
	ENSMUSG00000030532.7	Hddc3	0.314658	3.06061	4.50147	0.0443823	0.261764
	ENSMUSG00000043618.10	Eif5al3-ps	0.314627	0.270948	2.50123	0.193784	0.505847
	ENSMUSG00000095789.7	Nupr1l	0.314602	0.819955	2.22526	0.148795	0.451779
	ENSMUSG00000022048.9	Dpysl2	0.314594	7.10333	27.1957	2.41152e-05	0.0035227
	ENSMUSG00000048373.9	Fgfbp1	0.314491	3.75939	6.7318	0.0158961	0.16392
	ENSMUSG00000049411.16	Tmem241	0.314193	3.09362	8.32914	0.00812095	0.118999
	ENSMUSG00000031551.13	Ido1	0.314101	1.69521	0.894825	0.353598	0.658989
	ENSMUSG00000020083.14	Fam241b	0.31401	2.9663	8.606	0.00726088	0.111776
	ENSMUSG00000103332.2	Pcdhga2	0.313642	2.5244	2.49489	0.127303	0.423059
	ENSMUSG00000028460.7	Sit1	0.313435	0.679746	0.844269	0.367319	0.670151
	ENSMUSG00000078956.5	Gm14221	0.313224	2.29104	1.84734	0.186725	0.498489
	ENSMUSG00000085112.3	A530072M11Rik	0.312305	1.295	2.95449	0.0985102	0.375291
	ENSMUSG00000097675.4	1700101I11Rik	0.31213	0.201008	1.15117	0.29397	0.607714
	ENSMUSG00000037005.17	Xpnpep2	0.311942	4.19605	2.72225	0.111983	0.398273
	ENSMUSG00000031343.14	Gabra3	0.311882	3.84964	3.24059	0.0844144	0.349222
	ENSMUSG00000058192.17	Zfp846	0.31182	3.48031	14.6465	0.000814382	0.0319745
	ENSMUSG00000107868.2	Gm5112	0.311174	0.329092	1.44398	0.241216	0.558834
	ENSMUSG00000033967.5	Rnf225	0.311028	2.06451	2.64644	0.116838	0.406348
	ENSMUSG00000020411.3	Nipal4	0.310466	0.297866	0.519741	0.477914	0.753857
	ENSMUSG00000034457.11	Eda2r	0.310438	1.4402	3.19872	0.0863242	0.352914
	ENSMUSG00000031970.18	Dbndd1	0.310388	0.863609	1.9851	0.171675	0.481455
	ENSMUSG00000022479.16	Vdr	0.310032	3.60331	6.1954	0.020136	0.182361
	ENSMUSG00000000276.12	Dgke	0.310031	4.97609	21.2301	0.000112561	0.00899135
	ENSMUSG00000073073.5	Gm8098	0.309948	0.151006	1.04121	0.317713	0.628867
	ENSMUSG00000113311.2	Gm47428	0.309833	0.542894	0.362038	0.553017	0.802502
	ENSMUSG00000025997.14	Ikzf2	0.309518	2.43118	5.72408	0.0249125	0.201116
	ENSMUSG00000009633.4	G0s2	0.309316	6.00846	8.19676	0.00857124	0.121895
	ENSMUSG00000009207.16	Lnpk	0.309246	2.84471	5.1683	0.0322352	0.227096
	ENSMUSG00000034579.18	Pla2g3	0.30897	0.531634	1.00949	0.325044	0.634855
	ENSMUSG00000032511.18	Scn5a	0.308893	3.90452	4.10252	0.0540743	0.284822
	ENSMUSG00000087380.9	2210408F21Rik	0.308842	2.04417	4.70771	0.0401497	0.251157
	ENSMUSG00000023911.13	Flywch2	0.308663	1.65183	4.6213	0.0418653	0.256257
	ENSMUSG00000019789.10	Hey2	0.308546	2.33898	4.24283	0.0504167	0.275598
	ENSMUSG00000102269.2	Gm7357	0.308275	0.137438	0.904512	0.351052	0.65713
	ENSMUSG00000049723.15	Mmp12	0.308242	2.50876	1.29795	0.265828	0.582463
	ENSMUSG00000035773.7	Kiss1r	0.308237	2.47581	5.8665	0.0233483	0.195077
	ENSMUSG00000022340.16	Sybu	0.308178	2.40321	4.45524	0.0453984	0.264982
	ENSMUSG00000078451.6	Ppil6	0.308138	2.86896	4.95787	0.0356111	0.238333
	ENSMUSG00000071181.3	3830408C21Rik	0.308051	1.56201	3.4515	0.0755014	0.32999
	ENSMUSG00000021589.14	Rhobtb3	0.307777	3.17356	6.26144	0.019552	0.179747
	ENSMUSG00000061959.14	Ces1e	0.307767	2.91653	3.91456	0.059453	0.296649
	ENSMUSG00000085828.2	Gm15612	0.307654	0.239762	1.75048	0.198281	0.512056
	ENSMUSG00000053153.15	Spag16	0.307577	4.0716	4.70594	0.040184	0.251269
	ENSMUSG00000096740.9	Lbhd1	0.307194	2.37071	3.21947	0.0853719	0.350922
	ENSMUSG00000029442.19	Wdr66	0.30714	4.77504	7.42071	0.0118315	0.141051
	ENSMUSG00000041660.9	Bbox1	0.307009	1.7111	1.88782	0.182141	0.493524
	ENSMUSG00000019027.9	Dnah1	0.306945	3.52987	3.57141	0.0709166	0.321377
	ENSMUSG00000035237.8	Lcat	0.3069	1.59526	2.55881	0.12276	0.415525
	ENSMUSG00000034212.15	Ankmy1	0.306797	1.30514	1.64415	0.212001	0.527159
	ENSMUSG00000110427.2	4933406B17Rik	0.306794	2.21223	3.3081	0.0814365	0.342748
	ENSMUSG00000113204.3	Gm46430	0.306742	4.28052	16.7826	0.000412401	0.0210252
	ENSMUSG00000057093.15	Zfp607b	0.306672	1.09934	2.31001	0.141605	0.44179
	ENSMUSG00000083879.5	Gm14038	0.30657	0.61837	1.7361	0.20007	0.51359
	ENSMUSG00000036528.17	Ppfibp2	0.306185	5.54038	33.4664	5.78744e-06	0.00159237
	ENSMUSG00000031327.11	Chic1	0.306127	2.76824	5.63579	0.0259406	0.205697
	ENSMUSG00000064356.1	mt-Atp8	0.30598	7.17631	0.472579	0.498391	0.765268
	ENSMUSG00000048521.9	Cxcr6	0.305909	3.22189	2.82623	0.105702	0.387582
	ENSMUSG00000031495.9	Cd209d	0.305618	0.00129723	0.525358	0.475571	0.752417
	ENSMUSG00000119972.1	NA	0.305441	0.171506	1.05762	0.314009	0.625312
	ENSMUSG00000048481.16	Mypop	0.305384	3.15568	5.45689	0.0281715	0.212315
	ENSMUSG00000086448.2	9330162012Rik	0.305249	0.380557	1.62114	0.215124	0.5312
	ENSMUSG00000100150.4	Gm19585	0.305055	0.471959	1.52781	0.228399	0.545928
	ENSMUSG00000118537.2	Shld3	0.304772	1.05785	1.85737	0.185576	0.497106
	ENSMUSG00000074863.6	Platr25	0.304698	3.17447	9.9742	0.00424795	0.0832964
	ENSMUSG00000022676.8	Snai2	0.304609	3.6359	4.96015	0.0355725	0.238166
	ENSMUSG00000117959.2	D330050I16Rik	0.304572	0.453591	0.910881	0.349393	0.655168
	ENSMUSG00000026404.13	Ddx59	0.304328	3.15328	9.63873	0.00483242	0.089445
	ENSMUSG00000085314.2	Gm14866	0.304236	-0.22918	1.59552	0.280409	0.594666
	ENSMUSG00000085945.4	2310014F06Rik	0.304002	1.71094	2.80164	0.107149	0.390523
	ENSMUSG00000100967.2	Gm29666	0.303812	0.0962244	0.935378	0.343112	0.650229
	ENSMUSG00000036151.16	Tm6sf2	0.303663	1.51847	2.16407	0.154257	0.459672
	ENSMUSG00000118667.1	Ahnak2	0.303578	5.67804	5.7286	0.0248611	0.201093
	ENSMUSG00000096433.3	Zfp994	0.30354	2.92465	2.64857	0.116698	0.406233
	ENSMUSG00000044595.11	Dnd1	0.303507	0.79808	1.42445	0.244334	0.561743
	ENSMUSG00000047420.9	Fam180a	0.303313	1.95011	2.77873	0.108519	0.39284
	ENSMUSG00000023968.16	Crip3	0.303284	0.0436568	1.00149	0.326932	0.637319
	ENSMUSG00000047361.17	Gm973	0.303283	3.24133	2.16551	0.154126	0.459672
	ENSMUSG00000104392.2	Gm37962	0.303192	-0.25114	0.926567	0.345353	0.652459
	ENSMUSG00000039304.12	Tnfsf10	0.303132	7.36986	5.72335	0.0249208	0.201116
	ENSMUSG00000095742.2	NA	0.303099	2.0437	3.37727	0.0785093	0.336699
	ENSMUSG00000035640.19	Cbarp	0.303092	4.41276	9.55703	0.00498773	0.0907756
	ENSMUSG00000074355.3	Gm10676	0.30297	0.949233	1.81699	0.190255	0.502113
	ENSMUSG00000058427.11	Cxcl2	0.302961	0.543581	0.438734	0.514043	0.776643
	ENSMUSG00000082743.2	Gm12988	0.302787	1.13463	2.73202	0.111375	0.396829
	ENSMUSG00000121114.1	NA	0.302718	0.26813	1.43748	0.242249	0.559689
	ENSMUSG00000030865.5	Chp2	0.302694	1.66051	1.87679	0.183376	0.494558
	ENSMUSG00000110277.3	Gm45871	0.302547	3.05715	6.5697	0.0170628	0.168968
	ENSMUSG00000025175.13	Fn3k	0.302524	1.37163	1.812	0.190842	0.503143
	ENSMUSG00000071273.5	Gm5145	0.302461	-0.156655	1.64894	0.26811	0.584912
	ENSMUSG00000074846.4	Gm10774	0.302387	1.42891	2.86495	0.103468	0.383817
	ENSMUSG00000054418.7	2900041M22Rik	0.302351	-0.34291	0.512591	0.480926	0.754817
	ENSMUSG00000029778.13	Adcyap1r1	0.302344	3.10127	2.12063	0.158281	0.465262
	ENSMUSG00000043510.13	Hscb	0.302306	2.7211	5.30123	0.0302874	0.21985
	ENSMUSG00000024427.8	Spry4	0.302262	5.4887	6.39745	0.0184074	0.175113
	ENSMUSG00000042213.18	Zfand4	0.301926	2.13455	4.20973	0.0512536	0.277065
	ENSMUSG00000120095.1	NA	0.301841	0.178449	1.17354	0.289437	0.603034
	ENSMUSG00000051606.7	2010001K21Rik	0.301775	3.10774	4.14012	0.0530654	0.282316
	ENSMUSG00000052336.8	Cx3cr1	0.3017	4.7521	6.71676	0.0160006	0.164223
	ENSMUSG00000104682.2	Gm42636	0.301553	0.769644	2.36028	0.137536	0.43736
	ENSMUSG00000032258.16	Lca5	0.301322	3.65213	8.89495	0.00646857	0.104401
	ENSMUSG00000036181.3	H1f2	0.301282	5.80974	8.00377	0.00927768	0.127356
	ENSMUSG00000028017.8	Egf	0.301232	0.598651	1.01537	0.32367	0.633882
	ENSMUSG00000031789.18	Cngb1	0.30114	0.865897	1.82977	0.188759	0.500756
	ENSMUSG00000093677.2	Gm20712	0.300649	0.968819	2.06076	0.164036	0.472562
	ENSMUSG00000074738.3	Fndc10	0.300581	2.76905	4.45508	0.0454019	0.264982
	ENSMUSG00000081871.2	Gm11488	0.3005	-0.103377	1.58464	0.244187	0.561742
	ENSMUSG00000015222.19	Map2	0.300363	2.97812	4.97184	0.0353751	0.237491
	ENSMUSG00000041119.13	Pde9a	0.300312	5.28388	13.2701	0.00129177	0.0416946
	ENSMUSG00000035407.9	Kank4	0.300129	5.40235	7.52975	0.0113004	0.138237
	ENSMUSG00000105340.6	Gm42878	0.299993	1.79202	1.51759	0.229914	0.547399
	ENSMUSG00000044694.3	2010007H06Rik	0.299906	3.80844	7.05635	0.013816	0.153223
	ENSMUSG00000028933.12	Xrcc2	0.299703	2.61208	7.06703	0.0137529	0.153069
	ENSMUSG00000114267.2	Gm48600	0.299241	-0.0224529	0.704263	0.409634	0.703866
	ENSMUSG00000022468.13	Endou	0.299214	3.21091	3.12856	0.0896374	0.35889
	ENSMUSG00000081010.4	Gm13880	0.299166	-0.236402	0.921336	0.346693	0.653153
	ENSMUSG00000025170.14	Rab40b	0.299041	1.61194	3.64198	0.0683673	0.315371
	ENSMUSG00000072955.15	Tmsb15l	0.298996	-0.0653473	0.499781	0.486402	0.757189
	ENSMUSG00000071719.3	Nalf2	0.298967	2.85804	2.20804	0.150308	0.454385
	ENSMUSG00000022893.15	Adamts1	0.298597	7.28938	16.7336	0.000418704	0.0211688
	ENSMUSG00000028680.15	Plk3	0.298574	3.98204	7.77842	0.0101847	0.132103
	ENSMUSG00000115317.3	Gm32618	0.298499	2.12097	3.54071	0.0720593	0.3231
	ENSMUSG00000115852.4	Gm52969	0.298422	0.782592	1.11009	0.302553	0.615473
	ENSMUSG00000087381.10	Gm16008	0.298325	0.274374	1.09918	0.304887	0.617618
	ENSMUSG00000025196.5	Cpn1	0.298059	2.1657	3.74489	0.0648345	0.308239
	ENSMUSG00000070305.11	Mpzl3	0.298059	2.69991	4.55031	0.0433364	0.25903
	ENSMUSG00000117499.2	Gm50010	0.297862	2.43219	4.7034	0.0402333	0.251405
	ENSMUSG00000094910.2	D430019H16Rik	0.297799	4.33069	6.6064	0.0167906	0.167947
	ENSMUSG00000034607.7	Pof1b	0.297578	4.1179	5.77781	0.0243091	0.199422
	ENSMUSG00000030553.4	Pgpep1l	0.297244	-0.21887	1.17172	0.289802	0.603309
	ENSMUSG00000018199.10	Ro60	0.297209	4.98858	3.69629	0.0664761	0.31236
	ENSMUSG00000050860.7	Phospho1	0.297125	3.91914	1.18609	0.286931	0.600467
	ENSMUSG00000067149.7	Jchain	0.297014	3.90774	0.238966	0.62939	0.841827
	ENSMUSG00000025746.12	Il6	0.296463	1.28689	0.770282	0.388829	0.687126
	ENSMUSG00000033966.9	Cdkl4	0.296193	3.19665	4.23429	0.0506311	0.276051
	ENSMUSG00000045259.5	Klhdc9	0.296182	1.06858	0.83676	0.369422	0.671367
	ENSMUSG00000029369.18	Afm	0.29602	-0.299619	0.581471	0.453164	0.737206
	ENSMUSG00000115018.3	NA	0.29594	3.90861	5.12534	0.0328942	0.229915
	ENSMUSG00000026725.18	Tnn	0.295882	2.7431	4.89992	0.036609	0.240991
	ENSMUSG00000121482.1	NA	0.295376	2.87479	3.99002	0.0572241	0.291977
	ENSMUSG00000059708.13	Akap17b	0.29531	2.37803	7.44465	0.0117126	0.140308
	ENSMUSG00000085457.5	1110046J04Rik	0.294962	1.83227	3.00115	0.0960361	0.371281
	ENSMUSG00000034686.9	Prr7	0.294808	0.984627	1.70625	0.20385	0.518368
	ENSMUSG00000038323.4	1700066M21Rik	0.294717	2.76987	5.90384	0.0229564	0.193627
	ENSMUSG00000090642.3	Gm17182	0.294604	0.838712	1.54805	0.225434	0.541929
	ENSMUSG00000056596.9	Trnp1	0.294595	2.33988	4.24506	0.0503609	0.275598
	ENSMUSG00000063018.8	2010204K13Rik	0.294571	1.70768	2.45158	0.130494	0.42792
	ENSMUSG00000085184.11	4933439K11Rik	0.29451	0.599259	1.76873	0.204424	0.518889
	ENSMUSG00000029828.5	4921507P07Rik	0.29441	0.599484	1.40921	0.246802	0.563645
	ENSMUSG00000072663.13	Spef2	0.29436	3.61363	6.1813	0.0202632	0.182844
	ENSMUSG00000016624.16	Phf21b	0.294107	1.50536	2.48845	0.127772	0.423562
	ENSMUSG00000089628.2	Gm9727	0.294107	0.394853	1.36612	0.253955	0.571451
	ENSMUSG00000071537.7	Klrg2	0.294095	1.75602	1.92393	0.178168	0.488588
	ENSMUSG00000021340.14	Gpld1	0.294032	2.89074	1.79777	0.192532	0.504691
	ENSMUSG00000039873.5	Neurl2	0.293847	2.44588	3.28357	0.0825043	0.345442
	ENSMUSG00000037157.9	Il22ra1	0.293694	-0.218979	1.12357	0.2997	0.613124
	ENSMUSG00000085227.3	6330418K02Rik	0.293377	1.67721	1.56347	0.223208	0.539792
	ENSMUSG00000031828.10	Klhl36	0.293324	3.42206	7.24902	0.0127245	0.147353
	ENSMUSG00000026632.18	Tatdn3	0.293183	3.17646	13.0533	0.00139159	0.0440434
	ENSMUSG00000046404.6	Yod1	0.29314	3.97485	11.0718	0.0028159	0.0660498
	ENSMUSG00000087305.10	A430035B10Rik	0.292953	0.883	1.97211	0.17303	0.482885
	ENSMUSG00000113101.3	Gm33424	0.292901	-0.00185067	0.719702	0.404621	0.698715
	ENSMUSG00000024592.16	C330018D20Rik	0.292796	3.09506	8.93653	0.0063626	0.103578
	ENSMUSG00000087331.10	1810021B22Rik	0.292329	1.41856	2.51852	0.125601	0.42071
	ENSMUSG00000042115.5	Klhdc8a	0.292249	3.48349	4.23298	0.0506641	0.276051
	ENSMUSG00000029177.10	Cenpa	0.29223	3.70585	6.5226	0.0174194	0.170303
	ENSMUSG00000073102.8	Drc1	0.292111	4.33944	4.79666	0.0384655	0.246441
	ENSMUSG00000025049.7	Taf5	0.291954	2.88921	7.66116	0.0106949	0.135023
	ENSMUSG00000097820.4	E530011L22Rik	0.29183	4.47256	3.59107	0.0701956	0.319457
	ENSMUSG00000051499.8	Zfp786	0.291624	-0.197427	0.72371	0.403335	0.697701
	ENSMUSG00000106181.2	Gm9523	0.291266	1.33001	3.18249	0.0870782	0.353741
	ENSMUSG00000026765.13	Lypd6b	0.291126	2.13848	1.65148	0.211019	0.526093
	ENSMUSG00000045036.16	Tmem232	0.29109	2.7743	1.6745	0.207968	0.522603
	ENSMUSG00000054021.7	Sirt5	0.291078	3.43127	15.2826	0.000662137	0.0280019
	ENSMUSG00000024232.3	Bambi	0.291034	4.68092	10.4532	0.00354328	0.0760173
	ENSMUSG00000047342.18	Zfp286	0.291028	1.40269	1.8481	0.186638	0.498387
	ENSMUSG00000062743.10	Zfp677	0.290961	2.56937	7.6833	0.0105965	0.13482
	ENSMUSG00000048550.18	Thnsl1	0.290716	3.38217	7.17872	0.0131113	0.149129
	ENSMUSG00000070529.8	Wfdc10	0.290696	-0.1429	1.00455	0.326209	0.636307
	ENSMUSG00000032890.18	Rims3	0.290586	1.61284	3.17481	0.0874373	0.354618
	ENSMUSG00000107705.2	Gm45062	0.290495	4.21741	4.50796	0.0442416	0.261289
	ENSMUSG00000051483.10	Cbr1	0.290356	5.62417	5.27393	0.0306764	0.221561
	ENSMUSG00000058135.13	Gstm1	0.29021	8.84374	4.98849	0.0350961	0.236806
	ENSMUSG00000020420.9	Zfp607a	0.290144	2.1419	3.56049	0.071321	0.322124
	ENSMUSG00000021466.13	Ptch1	0.289865	6.44631	24.7621	4.41237e-05	0.00490282
	ENSMUSG00000079414.5	Gm11110	0.289811	0.364638	1.36088	0.254842	0.572207
	ENSMUSG00000091509.8	Gm17066	0.28981	1.34468	1.67007	0.20855	0.523156
	ENSMUSG00000046637.4	Ttc34	0.289798	2.87997	4.53953	0.0435648	0.259559
	ENSMUSG00000021245.16	Mlh3	0.289532	4.0691	18.9693	0.000213839	0.0135776
	ENSMUSG00000044352.7	Sowaha	0.28953	0.785365	1.51442	0.230387	0.547696
	ENSMUSG00000054822.6	1700041G16Rik	0.289525	-0.350121	1.55568	0.309419	0.620577
	ENSMUSG00000044145.3	1810024B03Rik	0.289512	0.55018	1.28121	0.268854	0.585422
	ENSMUSG00000009070.15	Rsph14	0.288994	1.75304	2.88747	0.102195	0.381529
	ENSMUSG00000020151.17	Ptprr	0.28886	1.20151	1.6431	0.212142	0.527181
	ENSMUSG00000030067.18	Foxp1	0.288777	6.85403	13.6493	0.00113541	0.0388955
	ENSMUSG00000074595.10	Wfdc6a	0.288671	0.517391	1.17142	0.289863	0.603309
	ENSMUSG00000038486.10	Sv2a	0.288633	1.19098	1.62421	0.214704	0.530834
	ENSMUSG00000106641.2	Gm43534	0.288579	0.00211248	1.14216	0.295825	0.609151
	ENSMUSG00000121083.1	NA	0.288566	2.92329	3.08226	0.0919036	0.363297
	ENSMUSG00000106461.2	Gm20755	0.288527	-0.197792	0.924835	0.345796	0.652801
	ENSMUSG00000068196.6	Col8a1	0.288393	3.96424	4.91502	0.0363459	0.240191
	ENSMUSG00000032348.7	Gsta4	0.288338	5.56203	5.01071	0.0347276	0.236066
	ENSMUSG00000033805.13	Ephx4	0.288329	0.862213	1.46039	0.238637	0.556509
	ENSMUSG00000024437.7	Gm8615	0.288155	0.017656	1.15216	0.302921	0.61586
	ENSMUSG00000044433.17	Camsap3	0.287711	5.0237	14.0244	0.00100081	0.0363033
	ENSMUSG00000112527.3	Gm35696	0.287594	1.54791	2.39453	0.134843	0.433568
	ENSMUSG00000086247.9	Gm15787	0.287583	0.767155	2.77267	0.133271	0.431396
	ENSMUSG00000117818.2	Gm50105	0.287481	0.226031	1.23098	0.284313	0.597874
	ENSMUSG00000020930.10	Ccdc103	0.287161	1.76645	2.3753	0.136347	0.435382
	ENSMUSG00000117428.2	Gm4833	0.28705	1.98359	3.73235	0.0652534	0.309129
	ENSMUSG00000019853.7	Hebp2	0.286957	0.9962	0.58058	0.453506	0.737206
	ENSMUSG00000082120.2	Gm15720	0.286665	1.00405	1.47417	0.236499	0.555107
	ENSMUSG00000120681.1	NA	0.286551	1.38387	2.68192	0.114536	0.402875
	ENSMUSG00000025658.17	Cnksr2	0.286445	0.285412	1.37686	0.252147	0.569104
	ENSMUSG00000028655.12	Mfsd2a	0.286303	3.13311	1.48616	0.234656	0.553133
	ENSMUSG00000085395.3	Gm13056	0.285939	1.87153	2.10548	0.159715	0.467336
	ENSMUSG00000041556.9	Fbxo2	0.285931	1.51667	1.47465	0.236423	0.555019
	ENSMUSG00000007379.16	Dennd2c	0.285888	3.13521	4.27977	0.0495008	0.273961
	ENSMUSG00000114937.2	Gm30054	0.285391	0.676354	0.808592	0.377468	0.677696
	ENSMUSG00000099478.2	Gm28370	0.28511	3.02714	3.67622	0.0671681	0.313395
	ENSMUSG00000072875.3	Gpr27	0.285077	2.0173	4.04277	0.055722	0.288496
	ENSMUSG00000026586.17	Prrx1	0.285028	4.20745	8.8013	0.00671445	0.106624
	ENSMUSG00000046719.8	Nxph3	0.284954	3.31638	3.97994	0.0575161	0.292371
	ENSMUSG00000030154.11	Klrb1f	0.284907	0.240449	0.807117	0.377896	0.678171
	ENSMUSG00000037035.6	Inhbb	0.284851	4.59867	7.51366	0.0113771	0.138491
	ENSMUSG00000070282.7	3000002C10Rik	0.284259	1.7342	3.65855	0.0677838	0.314498
	ENSMUSG00000037579.8	Kcnh3	0.283908	2.62484	1.86745	0.184431	0.495647
	ENSMUSG00000046997.6	Spsb4	0.283893	0.101395	1.18931	0.286294	0.599708
	ENSMUSG00000045205.17	Dpy19l4	0.283576	4.73078	20.1575	0.000151941	0.0105859
	ENSMUSG00000097164.4	Cep83os	0.283501	3.65942	7.89548	0.00970192	0.12967
	ENSMUSG00000000901.18	Mmp11	0.283424	5.74261	15.4491	0.000627621	0.0270627
	ENSMUSG00000047180.9	Neurl3	0.283396	5.73867	4.34087	0.0480268	0.270379
	ENSMUSG00000029822.16	Osbpl3	0.28338	5.30036	7.47568	0.0115604	0.139546
	ENSMUSG00000039620.18	Trmt9b	0.283359	0.899662	1.32241	0.261488	0.579398
	ENSMUSG00000036587.14	Fut7	0.283132	0.872834	1.5782	0.221108	0.537611
	ENSMUSG00000067771.10	NA	0.28306	0.422901	0.32271	0.575259	0.814235
	ENSMUSG00000018102.6	H2bc4	0.283054	5.81706	11.6561	0.00227654	0.0588022
	ENSMUSG00000038354.14	Ankrd35	0.282973	1.56928	1.2489	0.274823	0.590334
	ENSMUSG00000038982.11	Bloc1s5	0.282892	4.18824	13.5305	0.00118203	0.0395545
	ENSMUSG00000024481.6	Lvrn	0.282675	1.05742	1.22131	0.280057	0.594259
	ENSMUSG00000040563.14	Plppr2	0.282427	3.71849	5.26805	0.0307609	0.221709
	ENSMUSG00000047115.16	Fam221a	0.282332	3.17118	9.08319	0.00600371	0.100549
	ENSMUSG00000049588.14	Ccdc69	0.282063	2.48322	2.69928	0.113429	0.40077
	ENSMUSG00000025931.16	Paqr8	0.281935	5.22447	14.7557	0.000785736	0.0313325
	ENSMUSG00000097466.10	D430036J16Rik	0.281817	2.40816	3.05603	0.0932171	0.365776
	ENSMUSG00000087013.9	2610027K06Rik	0.281587	2.29537	5.52982	0.0272373	0.209319
	ENSMUSG00000028845.16	Tekt2	0.281537	3.4866	4.83545	0.0377559	0.24475
	ENSMUSG00000037683.15	Armc3	0.281458	2.41526	3.03685	0.0941914	0.367811
	ENSMUSG00000006642.4	Tcf23	0.281434	2.32677	0.722125	0.403843	0.698137
	ENSMUSG00000024177.10	Nme4	0.281273	1.07931	1.02855	0.320613	0.630746
	ENSMUSG00000036168.16	Ccdc38	0.281253	-0.0277116	1.12939	0.333329	0.642348
	ENSMUSG00000110235.3	Gm5086	0.281182	-0.329835	0.409173	0.528447	0.785735
	ENSMUSG00000048644.9	Ctxn1	0.281073	4.12299	7.79538	0.0101131	0.131994
	ENSMUSG00000021716.15	Srek1ip1	0.280886	3.41471	10.3682	0.0036584	0.0773533
	ENSMUSG00000097178.9	2310002F09Rik	0.280672	-0.307976	0.575066	0.455633	0.738688
	ENSMUSG00000094686.2	Ccl21a	0.280655	6.71144	7.07255	0.0137204	0.153009
	ENSMUSG00000039485.9	Tspyl4	0.280322	5.24508	14.1561	0.000957772	0.0352484
	ENSMUSG00000052137.12	Rbm12b2	0.280076	4.61972	15.7128	0.000576896	0.0258352
	ENSMUSG00000072915.4	Gm12258	0.280063	3.56626	6.66475	0.0163677	0.166005
	ENSMUSG00000061815.12	Rufy4	0.279942	1.67316	1.78921	0.193557	0.505518
	ENSMUSG00000027883.16	Gpsm2	0.279878	4.5908	14.637	0.000816933	0.0319745
	ENSMUSG00000059602.15	Syn3	0.279684	1.51812	1.45272	0.239839	0.557843
	ENSMUSG00000033053.5	Cfap95	0.279518	1.49197	1.92996	0.177515	0.487362
	ENSMUSG00000004633.18	Chn2	0.279352	3.46057	5.46904	0.0280134	0.21214
	ENSMUSG00000096141.3	Dnah7a	0.279224	2.09385	2.40251	0.134225	0.432704
	ENSMUSG00000042251.13	Pm20d1	0.27915	2.63625	4.87938	0.0369701	0.2421
	ENSMUSG00000042216.14	Sgsm1	0.279148	3.17613	7.90499	0.00966381	0.129654
	ENSMUSG00000071267.12	Zfp942	0.27901	3.70159	2.60155	0.119829	0.411597
	ENSMUSG00000028378.7	Ptgr1	0.278954	4.70306	10.7524	0.00316863	0.0711463
	ENSMUSG00000033985.18	Tesk2	0.278881	2.61636	6.67473	0.0162965	0.166005
	ENSMUSG00000048388.4	Fam171b	0.27888	1.4248	2.03112	0.166979	0.475586
	ENSMUSG00000054893.16	Zfp667	0.278716	2.76346	7.88618	0.00973934	0.12967
	ENSMUSG00000121490.1	NA	0.278698	3.28494	7.38409	0.012016	0.142564
	ENSMUSG00000033491.14	Prss35	0.278628	1.06803	1.52615	0.228645	0.546243
	ENSMUSG00000046818.8	Ddit4l	0.278607	2.18702	1.97841	0.172372	0.481982
	ENSMUSG00000076752.3	Trgc2	0.278566	0.679368	0.919892	0.347064	0.653324
	ENSMUSG00000041471.10	Shld2	0.278355	2.70013	5.49762	0.0276455	0.210918
	ENSMUSG00000032356.13	Rasgrf1	0.278317	1.4577	1.72308	0.201708	0.515735
	ENSMUSG00000100039.2	Gm28959	0.278304	0.270302	0.115807	0.736587	0.897827
	ENSMUSG00000023963.11	Cyp39a1	0.278172	4.51674	14.8912	0.000751726	0.0307962
	ENSMUSG00000024653.3	Scgb1a1	0.277934	14.3168	6.30229	0.0192002	0.178454
	ENSMUSG00000051396.16	Gm45902	0.277933	1.42297	2.32762	0.140163	0.441022
	ENSMUSG00000021700.11	Rab3c	0.27784	1.22527	2.56263	0.122495	0.41528
	ENSMUSG00000043518.8	Rai2	0.277831	3.63475	9.09175	0.00598345	0.100436
	ENSMUSG00000090957.3	Gm7535	0.27772	0.771298	1.79223	0.193195	0.505121
	ENSMUSG00000029727.8	Cyp3a13	0.27762	2.33504	3.06897	0.0925666	0.364999
	ENSMUSG00000116114.3	Gm35853	0.27758	4.28358	2.5345	0.124465	0.41836
	ENSMUSG00000110185.3	Igip	0.277577	5.38556	17.6816	0.000313382	0.0174668
	ENSMUSG00000060961.17	Slc4a4	0.277536	3.86765	9.47245	0.00515432	0.0923939
	ENSMUSG00000022199.13	Slc22a17	0.277469	5.35534	15.7052	0.000578288	0.0258352
	ENSMUSG00000111080.2	Gm20300	0.277431	4.76734	22.9574	7.05336e-05	0.00682553
	ENSMUSG00000064317.6	Gm10146	0.277349	1.75261	4.83161	0.0378255	0.244806
	ENSMUSG00000061186.16	Sfmbt2	0.277338	1.73353	2.23702	0.147772	0.450872
	ENSMUSG00000118506.2	NA	0.277247	4.88485	3.75701	0.064432	0.307062
	ENSMUSG00000116802.3	Gm5165	0.27718	2.51846	4.62442	0.041802	0.256131
	ENSMUSG00000007033.5	Hspa1l	0.277069	1.78484	1.18131	0.287882	0.601441
	ENSMUSG00000058396.8	Gpr182	0.276463	6.16768	4.26333	0.0499061	0.274638
	ENSMUSG00000040877.17	Wdr25	0.276458	2.77238	7.44487	0.0117116	0.140308
	ENSMUSG00000116637.2	Gm8130	0.276388	0.0768489	0.592043	0.449135	0.734256
	ENSMUSG00000051041.9	Olfml1	0.276266	4.3638	8.21014	0.00852451	0.121895
	ENSMUSG00000107369.2	Gstm2-ps1	0.276187	4.4052	2.84243	0.104761	0.385787
	ENSMUSG00000068969.4	Rpl32-ps	0.276168	-0.294334	0.431784	0.517365	0.779004
	ENSMUSG00000023829.10	Slc22a1	0.276058	-0.367331	0.648148	0.428677	0.718662
	ENSMUSG00000031994.14	Adamts8	0.275955	5.48987	2.58987	0.120621	0.412675
	ENSMUSG00000050914.17	Ankrd37	0.275916	1.59493	1.21261	0.281734	0.595944
	ENSMUSG00000112639.2	A730063M14Rik	0.27591	0.29271	0.840045	0.3685	0.670845
	ENSMUSG00000003273.15	Car11	0.275716	1.10313	0.881057	0.357261	0.661408
	ENSMUSG00000020620.15	Abca8b	0.2756	4.91533	15.8428	0.000553538	0.0252501
	ENSMUSG00000035860.10	Cdhr3	0.275526	5.3158	3.02403	0.094849	0.369049
	ENSMUSG00000048029.11	Eno4	0.275497	3.94879	3.46171	0.0750983	0.329066
	ENSMUSG00000044948.18	Cfap43	0.275455	4.89725	7.68374	0.0105945	0.13482
	ENSMUSG00000097974.3	Gm10605	0.275254	0.332157	0.881715	0.357084	0.661244
	ENSMUSG00000026831.17	Pierce1	0.275101	3.87665	4.25258	0.0501732	0.275458
	ENSMUSG00000022359.11	Wdyhv1	0.275096	4.45926	9.11789	0.00592207	0.100052
	ENSMUSG00000027489.16	Necab3	0.275011	0.317824	0.816563	0.375165	0.676005
	ENSMUSG00000056014.16	A430033K04Rik	0.274966	3.01766	4.56252	0.0430793	0.25897
	ENSMUSG00000006715.12	Gmnn	0.27496	2.78246	4.55486	0.0432404	0.25897
	ENSMUSG00000075408.6	Smim41	0.274893	3.61595	7.98072	0.00936624	0.12787
	ENSMUSG00000027208.15	Fgf7	0.27479	4.60177	14.5313	0.000845835	0.0328002
	ENSMUSG00000060301.7	2610008E11Rik	0.274735	4.89008	12.8775	0.00147872	0.0457717
	ENSMUSG00000079502.9	Cfap77	0.274672	3.21835	2.95985	0.0982223	0.374763
	ENSMUSG00000078247.7	Airn	0.274397	2.54079	5.45768	0.0281612	0.212315
	ENSMUSG00000028167.16	Bdh2	0.274337	0.464748	2.69523	0.179304	0.489844
	ENSMUSG00000092278.2	Gm8752	0.273702	0.185435	0.202488	0.656757	0.85673
	ENSMUSG00000109933.2	Gm7600	0.273627	2.53499	3.28955	0.0822426	0.344684
	ENSMUSG00000040621.15	Gemin8	0.273478	2.78127	6.72938	0.0159129	0.163992
	ENSMUSG00000104546.2	Gm43858	0.273468	0.533995	1.41789	0.245393	0.562427
	ENSMUSG00000022610.11	Mapk12	0.273445	5.36851	12.5137	0.00167858	0.0494017
	ENSMUSG00000043110.3	Lrrn4	0.2734	4.67447	6.37386	0.0186004	0.175993
	ENSMUSG00000041323.7	Ak7	0.273339	4.88586	4.87573	0.0370346	0.24234
	ENSMUSG00000030200.14	Bcl2l14	0.273218	2.61182	2.81819	0.106173	0.388598
	ENSMUSG00000034209.5	Rasl10a	0.273174	0.651815	1.15651	0.29288	0.606834
	ENSMUSG00000107096.4	Gm43597	0.273167	2.71769	4.13135	0.0532989	0.282706
	ENSMUSG00000002012.14	Pnck	0.272963	1.68784	1.01246	0.324349	0.634495
	ENSMUSG00000032816.16	Igdcc4	0.27288	1.93823	2.03053	0.167039	0.475677
	ENSMUSG00000022262.9	Dnah5	0.272877	4.69312	4.30008	0.0490053	0.272681
	ENSMUSG00000097767.10	Miat	0.272827	0.0121796	0.483517	0.49351	0.762094
	ENSMUSG00000070306.4	Ccdc153	0.272645	5.67544	4.4089	0.0464433	0.266572
	ENSMUSG00000089797.2	Gm16118	0.272404	-0.110682	0.839979	0.368518	0.670845
	ENSMUSG00000061527.8	Krt5	0.272247	2.37867	0.0316324	0.860329	0.950796
	ENSMUSG00000095865.2	Gm13237	0.272219	0.483378	0.308415	0.583793	0.818543
	ENSMUSG00000046949.17	Nqo2	0.271768	5.19138	35.1625	4.04543e-06	0.00129858
	ENSMUSG00000121134.1	NA	0.271513	0.38894	1.06158	0.313124	0.624505
	ENSMUSG00000110945.2	Gm9856	0.271438	3.20363	4.73006	0.0397189	0.249854
	ENSMUSG00000099681.2	1700052K11Rik	0.271259	2.72348	6.64549	0.0165059	0.166539
	ENSMUSG00000120766.1	NA	0.271206	-0.274292	0.670054	0.421084	0.712522
	ENSMUSG00000036814.14	Slc6a20a	0.271104	3.03176	1.03749	0.318561	0.629352
	ENSMUSG00000040410.15	Fbxl4	0.270924	4.45249	15.2618	0.000666604	0.0280019
	ENSMUSG00000031297.15	Slc7a3	0.270855	0.603312	1.26813	0.27125	0.586924
	ENSMUSG00000059810.19	Rgs3	0.27083	6.65271	20.2658	0.000147357	0.0103716
	ENSMUSG00000032558.20	Nphp3	0.270779	4.06997	8.32003	0.00815109	0.118999
	ENSMUSG00000019817.19	Plagl1	0.270761	5.0075	1.49464	0.233365	0.551623
	ENSMUSG00000027765.7	P2ry1	0.270576	1.86792	2.04597	0.165498	0.473936
	ENSMUSG00000047021.15	Cfap65	0.270517	5.64617	4.83362	0.0377891	0.244782
	ENSMUSG00000030319.9	Cand2	0.270475	3.20872	3.41929	0.0767904	0.332742
	ENSMUSG00000028755.4	Cda	0.270453	1.41565	1.04712	0.316372	0.627573
	ENSMUSG00000098183.2	Gm27010	0.270167	-0.0683972	0.841208	0.376001	0.676609
	ENSMUSG00000023999.15	Kif6	0.270155	2.24525	2.32381	0.140474	0.441438
	ENSMUSG00000062859.16	Tcp11	0.270009	3.31988	6.58043	0.0169827	0.168546
	ENSMUSG00000116090.2	Rpl19-ps6	0.269975	0.121566	0.520044	0.477788	0.753857
	ENSMUSG00000050945.9	Zfp438	0.269945	3.2157	11.3603	0.00253399	0.0624863
	ENSMUSG00000121277.1	NA	0.269611	1.19306	1.32458	0.261106	0.579156
	ENSMUSG00000014837.16	4931428F04Rik	0.269574	2.16302	2.14121	0.156359	0.463147
	ENSMUSG00000004540.8	Psg17	0.269546	-0.22788	0.977364	0.340128	0.647888
	ENSMUSG00000029182.11	Fam166c	0.269338	2.78478	2.42458	0.132531	0.430252
	ENSMUSG00000057068.16	Fam47e	0.26918	3.4239	4.11369	0.0537723	0.284087
	ENSMUSG00000094075.2	Ighv1-80	0.269133	-0.131331	0.0780676	0.782327	0.918473
	ENSMUSG00000025064.16	Col17a1	0.26896	3.51451	2.37268	0.136553	0.435603
	ENSMUSG00000064294.13	Aox3	0.268956	7.05194	8.66264	0.00709753	0.110044
	ENSMUSG00000008540.12	Mgst1	0.268942	7.63637	5.57524	0.0266728	0.207673
	ENSMUSG00000052305.7	Hbb-bs	0.268922	11.229	0.975278	0.333217	0.642348
	ENSMUSG00000117935.2	Gm8717	0.26889	0.238426	1.68541	0.229605	0.547299
	ENSMUSG00000024798.16	Htr7	0.268831	-0.0324929	1.44055	0.289295	0.602866
	ENSMUSG00000059336.15	Slc14a1	0.268769	1.22734	1.64779	0.211513	0.526701
	ENSMUSG00000073274.6	Gm14636	0.268376	0.681363	1.0697	0.311319	0.622065
	ENSMUSG00000039081.11	Zfp503	0.268342	6.05244	6.33836	0.0188952	0.177043
	ENSMUSG00000034334.9	Fam151b	0.268169	2.32837	3.46219	0.0750795	0.329066
	ENSMUSG00000016758.5	Bik	0.268166	3.34306	3.8911	0.0601661	0.298489
	ENSMUSG00000025176.15	Hoga1	0.268124	2.96253	6.09633	0.0210488	0.186153
	ENSMUSG00000103160.2	C130012C08Rik	0.268115	1.13902	1.45263	0.239852	0.557843
	ENSMUSG00000019997.12	Ccn2	0.267933	8.05849	4.35878	0.047604	0.269047
	ENSMUSG00000103520.2	1110025M09Rik	0.267858	1.15849	1.74493	0.198969	0.512841
	ENSMUSG00000066952.12	Myo1h	0.267668	2.47008	3.20727	0.0859301	0.352214
	ENSMUSG00000076563.3	Igkv5-48	0.267646	-0.212557	0.229568	0.63618	0.845582
	ENSMUSG00000042742.8	Bmt2	0.267618	4.04373	3.36946	0.078834	0.337576
	ENSMUSG00000103653.2	Gstp-ps	0.267475	4.21887	4.99628	0.0349665	0.236806
	ENSMUSG00000035868.10	Zfp983	0.267266	2.87616	4.13489	0.0532045	0.282465
	ENSMUSG00000074277.5	Phldb3	0.266798	2.42483	3.6703	0.0673737	0.313794
	ENSMUSG00000028871.8	Rspo1	0.266767	4.66297	6.13486	0.0206885	0.184749
	ENSMUSG00000035045.18	Zc3h12b	0.266583	1.18626	1.75253	0.198027	0.511947
	ENSMUSG00000115344.2	Gm49364	0.266564	0.250488	0.252675	0.619778	0.83722
	ENSMUSG00000055170.5	Ifng	0.266539	-0.231567	0.507887	0.482925	0.756039
	ENSMUSG00000112332.2	4930466K18Rik	0.26648	1.0071	1.77656	0.195085	0.506911
	ENSMUSG00000024033.11	Rsph1	0.266457	4.43553	3.17014	0.0876564	0.355008
	ENSMUSG00000109909.2	Gm45663	0.266418	0.214124	0.962724	0.336287	0.644537
	ENSMUSG00000029134.15	Plb1	0.266306	3.50569	7.17116	0.0131537	0.149414
	ENSMUSG00000003070.7	Efna2	0.266214	1.46392	1.95254	0.175095	0.485306
	ENSMUSG00000039543.17	Cfap70	0.266088	3.32133	3.32198	0.0808391	0.341772
	ENSMUSG00000020312.13	Shc2	0.266066	2.16632	2.84353	0.104697	0.385722
	ENSMUSG00000076580.4	Igkv8-27	0.265988	-0.146917	0.162405	0.690518	0.874639
	ENSMUSG00000091736.4	Yy2	0.265954	1.65668	0.837767	0.369139	0.671367
	ENSMUSG00000044365.16	Cxxc4	0.265862	0.944514	1.13376	0.297567	0.610635
	ENSMUSG00000053469.15	Tg	0.265833	1.12551	1.53253	0.227704	0.545017
	ENSMUSG00000087639.2	Gm15512	0.265715	1.05574	0.514817	0.479985	0.754671
	ENSMUSG00000067780.4	Pi15	0.265602	3.2714	1.65517	0.210525	0.525674
	ENSMUSG00000054320.17	Lrrc36	0.265596	3.56293	4.106	0.0539799	0.284596
	ENSMUSG00000062861.9	Zfp28	0.265583	3.42049	5.54172	0.027088	0.208965
	ENSMUSG00000087403.10	Kantr	0.265454	2.94831	5.03335	0.0343567	0.234401
	ENSMUSG00000036295.6	Lrrn3	0.265345	3.62143	5.25113	0.0310057	0.222971
	ENSMUSG00000055560.9	Zfp459	0.265062	0.347363	1.07025	0.311198	0.621965
	ENSMUSG00000048012.20	Zfp473	0.264899	-0.081192	0.624691	0.437048	0.72558
	ENSMUSG00000098098.9	Bvht	0.264836	4.03009	7.57686	0.0110791	0.137096
	ENSMUSG00000102742.2	Pcdhga11	0.264807	3.3233	2.65799	0.116083	0.405645
	ENSMUSG00000041396.14	Mettl18	0.264795	2.16649	3.48728	0.0740988	0.327471
	ENSMUSG00000037347.8	Chst7	0.264554	3.18013	4.67544	0.040781	0.252734
	ENSMUSG00000120169.1	NA	0.26453	2.31773	3.32864	0.0805543	0.341403
	ENSMUSG00000038987.9	Cfap157	0.26447	2.74487	2.75554	0.109926	0.394504
	ENSMUSG00000028124.16	Gclm	0.264203	5.61437	7.49146	0.0114839	0.139204
	ENSMUSG00000106957.2	Gm43085	0.264187	7.44317	8.10664	0.00889346	0.124455
	ENSMUSG00000076749.3	Trgc1	0.263949	1.56489	1.85074	0.186335	0.497887
	ENSMUSG00000075033.5	Nxpe3	0.263931	4.33104	8.78499	0.0067583	0.107111
	ENSMUSG00000020811.17	Wscd1	0.263846	5.58987	10.7539	0.00316687	0.0711463
	ENSMUSG00000112121.3	C230072F16Rik	0.263704	2.14479	2.13314	0.15711	0.463944
	ENSMUSG00000028717.13	Tal1	0.263618	4.73636	15.4302	0.000631435	0.0271596
	ENSMUSG00000073415.5	Gm10501	0.263468	0.185578	0.123021	0.72884	0.89353
	ENSMUSG00000028536.13	2610528J11Rik	0.263166	2.88247	6.00214	0.0219593	0.189658
	ENSMUSG00000084974.2	Gm15567	0.263118	0.970994	2.22609	0.15238	0.456982
	ENSMUSG00000048038.9	Ccdc187	0.263077	5.18236	4.89389	0.0367146	0.241339
	ENSMUSG00000021418.16	Rpp40	0.262836	1.66647	3.23548	0.0846448	0.349508
	ENSMUSG00000032033.12	Barx2	0.262812	1.69121	1.08656	0.307619	0.619474
	ENSMUSG00000021874.14	4933413J09Rik	0.262685	-0.269357	0.908013	0.369774	0.671478
	ENSMUSG00000078435.6	AU041133	0.262641	1.83811	3.79576	0.0631649	0.304397
	ENSMUSG00000037973.7	Itprid1	0.262605	3.46464	3.70727	0.0661012	0.311697
	ENSMUSG00000053714.10	4732471J01Rik	0.262537	1.22762	2.43544	0.131707	0.429219
	ENSMUSG00000035694.16	Caps2	0.262508	0.810022	1.11534	0.301437	0.6148
	ENSMUSG00000032611.10	1700102P08Rik	0.262424	-0.235662	0.696738	0.412111	0.705736
	ENSMUSG00000066235.8	Pomgnt2	0.262225	3.5337	7.45085	0.011682	0.140308
	ENSMUSG00000108358.2	Gm44509	0.262141	3.50086	5.33606	0.029799	0.218316
	ENSMUSG00000110529.2	Gm45694	0.26211	0.0868269	0.450439	0.508533	0.772855
	ENSMUSG00000031112.11	Stk26	0.262056	2.95051	3.54507	0.0718958	0.3231
	ENSMUSG00000092470.2	Gm20518	0.262006	1.40955	0.696078	0.41233	0.705736
	ENSMUSG00000043541.17	Casc1	0.261985	3.60498	3.45632	0.0753109	0.329551
	ENSMUSG00000046658.17	Zfp316	0.261971	3.98311	12.0897	0.00194944	0.0533833
	ENSMUSG00000042595.8	Fam199x	0.261886	2.89013	2.54876	0.123462	0.416846
	ENSMUSG00000104699.2	Rps4x-ps	0.261752	2.7614	4.84167	0.0376437	0.244388
	ENSMUSG00000121096.1	NA	0.261606	4.83306	7.56827	0.0111191	0.137096
	ENSMUSG00000070280.14	Slc22a14	0.261498	0.331913	1.07407	0.310356	0.621522
	ENSMUSG00000078864.11	Gm14322	0.261431	1.61583	1.87263	0.183845	0.49507
	ENSMUSG00000106157.3	4930555A03Rik	0.261311	0.750318	1.13934	0.296409	0.60934
	ENSMUSG00000061322.16	Dnai1	0.261123	3.28675	3.71536	0.0658263	0.310739
	ENSMUSG00000012123.18	Crybg2	0.261038	3.2589	4.99712	0.0349526	0.236806
	ENSMUSG00000068876.17	Cgn	0.26076	6.83108	27.8958	2.03819e-05	0.00319492
	ENSMUSG00000055334.5	Snupn	0.260469	3.01082	8.4003	0.00788967	0.11739
	ENSMUSG00000002908.18	Kcnn1	0.26043	1.03669	1.04096	0.31777	0.628867
	ENSMUSG00000050014.9	Apol10b	0.26041	3.23258	1.18493	0.287161	0.600699
	ENSMUSG00000020546.15	Stxbp4	0.260226	3.71634	7.88078	0.00976114	0.129754
	ENSMUSG00000034059.15	Ypel4	0.260131	1.15641	1.26708	0.271444	0.587054
	ENSMUSG00000037716.16	Ccdc33	0.260095	3.39285	1.8229	0.189561	0.501515
	ENSMUSG00000027867.11	Spag17	0.260039	3.24871	2.7301	0.111494	0.397171
	ENSMUSG00000114584.2	Gm47694	0.259967	1.30667	2.43284	0.131904	0.429232
	ENSMUSG00000103955.2	Gm37270	0.259942	0.886437	0.379156	0.54385	0.796183
	ENSMUSG00000019987.10	Arg1	0.259832	1.42718	1.35349	0.256103	0.573921
	ENSMUSG00000045467.14	Ttll13	0.259797	0.694282	1.07973	0.30911	0.620409
	ENSMUSG00000084844.5	Hoxb3os	0.259545	1.76835	1.12216	0.299997	0.613579
	ENSMUSG00000037610.16	Kcnmb2	0.259346	2.69706	3.09754	0.0911487	0.36213
	ENSMUSG00000068134.14	Zfp120	0.259326	3.88154	4.12264	0.0535318	0.283421
	ENSMUSG00000054931.9	NA	0.259264	1.97689	3.5703	0.0709577	0.321474
	ENSMUSG00000038175.11	Mylip	0.259186	5.52755	11.0784	0.00280907	0.0659788
	ENSMUSG00000106891.2	Gm43460	0.25917	0.581608	1.08369	0.308244	0.619755
	ENSMUSG00000024791.11	Cdca5	0.25908	1.42921	0.97287	0.333803	0.642869
	ENSMUSG00000120507.1	NA	0.258999	2.02942	2.55615	0.122945	0.415634
	ENSMUSG00000027875.13	Hmgcs2	0.258986	4.85236	1.31148	0.263415	0.580514
	ENSMUSG00000056174.9	Col8a2	0.25898	4.5327	4.61787	0.041935	0.256382
	ENSMUSG00000121164.1	NA	0.258806	3.31273	3.33334	0.0803539	0.341052
	ENSMUSG00000097504.2	4930516B21Rik	0.258651	2.49093	4.25359	0.050148	0.275433
	ENSMUSG00000031438.12	Rnf128	0.258466	2.95371	2.77227	0.108908	0.393214
	ENSMUSG00000022456.19	Septin3	0.258301	2.67251	1.21197	0.281858	0.596042
	ENSMUSG00000026589.15	Sec16b	0.258291	3.44619	6.66383	0.0163742	0.166005
	ENSMUSG00000024776.19	Stambpl1	0.258286	3.73189	8.43083	0.00779269	0.116347
	ENSMUSG00000108456.2	4732496C06Rik	0.258278	2.8172	3.78355	0.0635612	0.304946
	ENSMUSG00000032531.16	Amotl2	0.258229	8.1359	8.48507	0.00762356	0.115152
	ENSMUSG00000095589.3	Ighv1-55	0.258224	0.381334	0.128381	0.723248	0.89122
	ENSMUSG00000060548.14	Tnfrsf19	0.25821	6.21776	11.0479	0.00284075	0.0663395
	ENSMUSG00000070729.6	Gm12966	0.25782	5.30587	6.43697	0.0180888	0.174002
	ENSMUSG00000090236.4	Car15	0.257554	1.76808	2.54731	0.123563	0.417026
	ENSMUSG00000095159.3	Tubb4b-ps1	0.257482	1.90325	1.73573	0.200117	0.51359
	ENSMUSG00000016498.11	Pdcd1lg2	0.257465	-0.320022	0.437671	0.514549	0.776951
	ENSMUSG00000006462.8	A530013C23Rik	0.25737	-0.14086	0.902688	0.358702	0.662534
	ENSMUSG00000022773.20	Ypel1	0.257281	2.1166	2.40578	0.133972	0.4325
	ENSMUSG00000107121.3	1110006O24Rik	0.257271	-0.118261	0.880377	0.357443	0.661533
	ENSMUSG00000099564.3	Gm28729	0.257201	2.82057	2.68277	0.114481	0.402845
	ENSMUSG00000043496.8	Tril	0.257063	5.21075	8.7376	0.00688754	0.107751
	ENSMUSG00000055240.18	Zfp101	0.25706	4.01133	6.58684	0.0169351	0.168322
	ENSMUSG00000050240.17	Hic2	0.257032	2.38089	3.81126	0.0626662	0.30384
	ENSMUSG00000104291.2	A130071D04Rik	0.257022	0.467064	0.795147	0.381399	0.680991
	ENSMUSG00000036095.12	Dgkb	0.257021	1.1188	1.56061	0.22362	0.54009
	ENSMUSG00000021514.19	Zfp369	0.257017	3.81448	6.00243	0.0219564	0.189658
	ENSMUSG00000084342.2	Gm11224	0.256965	0.825461	1.40346	0.247741	0.564525
	ENSMUSG00000000579.15	Dynlt1c	0.256961	3.94416	3.99555	0.0570644	0.291864
	ENSMUSG00000037169.16	Mycn	0.256857	1.41071	0.501236	0.485775	0.756954
	ENSMUSG00000059921.16	Unc5c	0.256772	3.86259	8.62372	0.00720932	0.111378
	ENSMUSG00000091780.4	Sco2	0.256745	3.11603	1.99052	0.171115	0.480576
	ENSMUSG00000098132.2	Rassf10	0.256688	1.86482	2.47328	0.128884	0.425213
	ENSMUSG00000025489.6	Ifitm5	0.256646	0.518441	1.46796	0.237458	0.555321
	ENSMUSG00000087366.9	Junos	0.256636	1.83457	2.83942	0.104935	0.386004
	ENSMUSG00000097087.2	Gm26878	0.256522	1.86298	2.60313	0.119722	0.41154
	ENSMUSG00000047246.8	H2bc6	0.256427	2.28845	2.3178	0.140965	0.441781
	ENSMUSG00000039114.17	Nrn1	0.256345	4.75006	2.92375	0.10018	0.378164
	ENSMUSG00000043262.17	Uevld	0.256145	3.99336	10.1956	0.00390479	0.0795365
	ENSMUSG00000083378.4	Gm13196	0.255903	-0.159803	0.721759	0.403961	0.6982
	ENSMUSG00000008307.12	1700109H08Rik	0.25584	-0.212169	0.508649	0.4826	0.755996
	ENSMUSG00000017412.16	Cacnb4	0.255692	0.60629	0.810938	0.376788	0.677417
	ENSMUSG00000036231.6	Agr3	0.255593	2.14355	2.54451	0.12376	0.417282
	ENSMUSG00000016283.14	H2-M2	0.255349	1.03972	0.799734	0.380051	0.679786
	ENSMUSG00000104507.2	A430027H14Rik	0.255282	1.60876	1.29065	0.267143	0.583868
	ENSMUSG00000026447.18	Pik3c2b	0.255097	4.58708	13.9569	0.0010237	0.0366547
	ENSMUSG00000034265.9	Zdhhc14	0.25496	4.14355	15.3132	0.000655656	0.0278992
	ENSMUSG00000042988.11	Notum	0.254942	3.29032	4.45968	0.0452996	0.264563
	ENSMUSG00000060377.5	Rpl36a-ps1	0.254856	1.68028	1.7365	0.200021	0.51359
	ENSMUSG00000021179.9	Nrde2	0.254819	4.36729	11.3588	0.00253536	0.0624863
	ENSMUSG00000100162.3	Gm20687	0.254651	-0.174736	0.434785	0.515926	0.778092
	ENSMUSG00000097093.4	C330013E15Rik	0.254487	-0.0676231	0.615128	0.440534	0.727268
	ENSMUSG00000029102.10	Hgfac	0.254487	2.35813	3.61378	0.0693733	0.317827
	ENSMUSG00000116165.2	Pdxp	0.254229	1.599	2.16368	0.154293	0.459672
	ENSMUSG00000045519.16	Zfp560	0.254055	2.97195	6.02361	0.021748	0.18877
	ENSMUSG00000056418.5	BC043934	0.254006	2.08616	1.66509	0.209208	0.524199
	ENSMUSG00000070605.5	Zfp992	0.253956	1.31175	1.68709	0.206323	0.520819
	ENSMUSG00000106133.2	Gm3724	0.253689	3.09178	5.47282	0.0279645	0.211953
	ENSMUSG00000034285.16	Nipsnap1	0.253685	3.46754	4.0743	0.0548455	0.286612
	ENSMUSG00000028145.10	Them4	0.253672	2.83171	4.37782	0.0471594	0.268091
	ENSMUSG00000061882.13	NA	0.25361	2.80192	4.18874	0.0517925	0.278762
	ENSMUSG00000039763.11	Dnajc28	0.253542	2.98603	3.70118	0.0663088	0.312084
	ENSMUSG00000107811.2	Gm44000	0.253537	1.51689	1.40635	0.247268	0.563959
	ENSMUSG00000021234.10	Fam161b	0.253512	3.43597	5.20236	0.0317231	0.225569
	ENSMUSG00000034066.14	Farp2	0.25344	2.86116	4.41569	0.0462885	0.266508
	ENSMUSG00000020553.9	Pctp	0.253439	4.17746	5.73477	0.0247911	0.200902
	ENSMUSG00000053574.6	4930563E22Rik	0.253289	0.369637	0.550647	0.465252	0.745178
	ENSMUSG00000056735.7	A930024E05Rik	0.253242	1.69876	2.22988	0.148392	0.451171
	ENSMUSG00000059970.8	Hspa2	0.253015	4.64099	3.55273	0.0716097	0.322793
	ENSMUSG00000090206.9	Tepp	0.252837	-0.0572164	0.50254	0.485214	0.756954
	ENSMUSG00000029153.12	Ociad2	0.252586	3.89468	7.93622	0.00953987	0.128657
	ENSMUSG00000108181.2	C030015A19Rik	0.252344	1.66978	2.90767	0.101067	0.380003
	ENSMUSG00000012483.5	Rpa3	0.252261	2.56252	6.12283	0.0208003	0.185151
	ENSMUSG00000084960.2	B430010I23Rik	0.252178	4.8617	3.55288	0.071604	0.322793
	ENSMUSG00000037624.16	Kcnk2	0.252134	4.92513	4.47774	0.0449007	0.263249
	ENSMUSG00000074635.4	3110070M22Rik	0.252096	0.184578	0.719386	0.404723	0.698752
	ENSMUSG00000062691.11	NA	0.252049	2.71725	5.08967	0.0334529	0.231274
	ENSMUSG00000040471.18	Ggt6	0.251997	1.28795	2.90628	0.101145	0.38013
	ENSMUSG00000060212.14	Pcnx2	0.251932	1.4308	1.70496	0.204015	0.518526
	ENSMUSG00000035840.8	Lysmd3	0.251598	4.12274	4.22752	0.050802	0.276051
	ENSMUSG00000038522.8	Mfsd4b1	0.251569	1.62149	1.50346	0.232032	0.549481
	ENSMUSG00000038756.14	Ttll6	0.251566	3.56853	2.38775	0.135371	0.434323
	ENSMUSG00000101304.3	Plet1os	0.251384	-0.138382	0.546222	0.467031	0.745838
	ENSMUSG00000105366.2	Gm43719	0.251345	3.28003	5.52874	0.0272508	0.209319
	ENSMUSG00000018570.18	2810408A11Rik	0.251216	0.704372	1.31477	0.262833	0.580089
	ENSMUSG00000104002.3	Gm38336	0.251185	0.996382	1.1442	0.295404	0.608772
	ENSMUSG00000074923.11	Pak6	0.25116	2.59328	2.38649	0.135469	0.434454
	ENSMUSG00000027165.17	Iftap	0.25114	3.50143	6.52333	0.0174138	0.170303
	ENSMUSG00000043230.3	Fam124b	0.251098	1.8154	1.38924	0.250084	0.567185
	ENSMUSG00000030147.13	Clec4b1	0.251028	0.720352	1.2284	0.278699	0.592777
	ENSMUSG00000020131.15	Pcsk4	0.250688	2.04884	2.27761	0.144304	0.446149
	ENSMUSG00000030030.6	1700003E16Rik	0.250687	3.49918	2.75773	0.109792	0.394504
	ENSMUSG00000074398.7	Gm15441	0.250649	0.317764	1.615	0.259781	0.578373
	ENSMUSG00000085315.9	A430018G15Rik	0.250559	1.44455	1.74595	0.198843	0.51277
	ENSMUSG00000085705.2	Gm16046	0.250491	1.67042	1.25778	0.273165	0.588278
	ENSMUSG00000036867.8	Smad6	0.250482	7.54122	4.29754	0.0490669	0.272867
	ENSMUSG00000021712.16	Trim23	0.250468	3.99911	11.0117	0.00287887	0.0668931
	ENSMUSG00000068617.6	Efcab1	0.250316	3.50347	2.96853	0.0977579	0.374235
	ENSMUSG00000030562.18	Nox4	0.250096	6.22754	10.3057	0.00374555	0.0780483
	ENSMUSG00000024511.16	Rab27b	0.25007	4.81304	7.43617	0.0117546	0.140423
	ENSMUSG00000036598.5	Ccdc113	0.250067	3.44862	4.17973	0.0520257	0.279313
	ENSMUSG00000044712.16	Slc38a6	0.250024	4.23886	13.6795	0.00112385	0.0387293
	ENSMUSG00000051736.9	Fam229b	0.249939	1.88461	2.59153	0.120509	0.412675
	ENSMUSG00000020072.16	Pbld2	0.249766	2.0377	1.51602	0.230149	0.547544
	ENSMUSG00000034858.17	Atosa	0.249765	4.77372	6.27668	0.0194199	0.17896
	ENSMUSG00000030316.14	Tamm41	0.249739	2.67845	3.08983	0.0915289	0.362643
	ENSMUSG00000121028.1	NA	0.249708	-0.037329	0.334162	0.568602	0.810541
	ENSMUSG00000030598.16	Fbxo17	0.249585	2.57147	4.86849	0.0371632	0.242723
	ENSMUSG00000070709.13	Zfp974	0.249526	3.12559	4.8389	0.0376936	0.244571
	ENSMUSG00000028487.19	Bnc2	0.249413	1.13908	1.61552	0.215896	0.531651
	ENSMUSG00000013523.14	Bcas1	0.249046	2.8248	3.7281	0.0653963	0.309467
	ENSMUSG00000107743.2	Gm44087	0.249019	2.67701	1.61483	0.215991	0.531651
	ENSMUSG00000120144.1	NA	0.248954	5.07126	5.32156	0.0300012	0.219056
	ENSMUSG00000061048.9	Cdh3	0.248923	1.46775	2.12751	0.157636	0.464545
	ENSMUSG00000115431.2	Gm3219	0.248665	1.64053	1.77868	0.194828	0.506831
	ENSMUSG00000050944.15	Efcab5	0.248371	0.174228	0.948549	0.339801	0.647549
	ENSMUSG00000049001.6	Ndnf	0.248362	7.64683	6.28546	0.0193442	0.178834
	ENSMUSG00000029503.17	P2rx2	0.248296	0.0747173	0.719801	0.404589	0.698715
	ENSMUSG00000045275.18	Lca5l	0.248282	1.8856	1.63169	0.213685	0.529448
	ENSMUSG00000110419.3	AW046200	0.248242	0.959448	1.96035	0.198335	0.512056
	ENSMUSG00000006154.14	Eps8l1	0.248194	5.57326	2.77799	0.108564	0.39284
	ENSMUSG00000035547.15	Capn5	0.248153	5.34582	7.31852	0.0123544	0.144501
	ENSMUSG00000041685.17	Fcho2	0.248122	6.13553	3.74778	0.0647382	0.30812
	ENSMUSG00000117145.2	Gng5c	0.248009	-0.322607	0.760037	0.391952	0.689547
	ENSMUSG00000021615.14	Xrcc4	0.24782	3.32847	5.60963	0.0262541	0.206456
	ENSMUSG00000041673.13	Lrrc18	0.247702	1.90317	1.86539	0.184665	0.496045
	ENSMUSG00000078490.11	Cfap74	0.247657	4.25575	2.91546	0.100637	0.379294
	ENSMUSG00000067219.10	Nipal1	0.247578	2.78592	4.06282	0.0551628	0.287145
	ENSMUSG00000097750.3	Gm4673	0.247563	3.08084	5.83742	0.0236586	0.196784
	ENSMUSG00000025227.15	Mfsd13a	0.247513	3.38491	3.04663	0.0936931	0.366669
	ENSMUSG00000034105.10	Meak7	0.247498	3.89911	9.73756	0.00465158	0.0876418
	ENSMUSG00000037710.9	Cisd1	0.247377	4.86065	12.0693	0.00196363	0.0536004
	ENSMUSG00000087153.9	Gm6483	0.247069	0.0649435	1.0397	0.318058	0.628932
	ENSMUSG00000056598.17	Drc3	0.246963	4.61193	4.13222	0.0532755	0.282706
	ENSMUSG00000032607.13	Amt	0.246924	3.56224	5.09443	0.0333778	0.231093
	ENSMUSG00000030670.17	Cyp2r1	0.24682	0.160049	0.59399	0.448399	0.733675
	ENSMUSG00000116288.2	Gm41349	0.246796	0.121064	0.93179	0.344022	0.651091
	ENSMUSG00000056215.15	Lrguk	0.246557	3.10036	2.36533	0.137135	0.436404
	ENSMUSG00000025795.9	Rassf3	0.246291	7.78177	31.2265	9.44853e-06	0.00226079
	ENSMUSG00000000385.9	Tmprss2	0.246248	6.77669	17.2173	0.000360833	0.0193046
	ENSMUSG00000089951.9	Zfp968-ps	0.246198	-0.155549	0.32399	0.574507	0.813803
	ENSMUSG00000038453.18	Srcin1	0.246136	4.45287	13.7402	0.00110106	0.0383247
	ENSMUSG00000048834.17	Vstm2a	0.246109	0.555984	0.938879	0.342228	0.649674
	ENSMUSG00000020956.15	Dtd2	0.246082	3.25799	5.91367	0.0228545	0.193343
	ENSMUSG00000029650.11	Slc46a3	0.245975	4.40565	6.58932	0.0169167	0.168247
	ENSMUSG00000038065.14	Mturn	0.245869	5.69852	10.6201	0.00332871	0.0734096
	ENSMUSG00000092572.9	Serpinb10	0.245747	1.54169	0.763374	0.390931	0.688637
	ENSMUSG00000025597.14	Klhl4	0.245734	0.997349	1.07331	0.310521	0.621697
	ENSMUSG00000105419.2	Gm43205	0.245682	0.810391	2.00951	0.232665	0.550624
	ENSMUSG00000020599.14	Rgs9	0.245644	3.94855	5.08923	0.0334599	0.231274
	ENSMUSG00000114278.3	Gm49027	0.245559	1.37232	0.821158	0.373847	0.675205
	ENSMUSG00000028940.3	Hes2	0.245399	2.26468	1.35249	0.256274	0.574231
	ENSMUSG00000024885.10	Aldh3b1	0.245359	6.20355	7.47806	0.0115488	0.139503
	ENSMUSG00000079669.4	Gm17396	0.245359	2.71096	5.24443	0.031103	0.223246
	ENSMUSG00000071551.14	Akr1c19	0.245147	2.07122	2.00457	0.169669	0.47911
	ENSMUSG00000046667.15	Rbm12b1	0.245043	3.88179	9.40838	0.00528455	0.0935674
	ENSMUSG00000059834.13	Sclt1	0.245021	3.40973	5.42219	0.0286285	0.213715
	ENSMUSG00000053916.5	Nanp	0.244912	1.83232	1.07673	0.30977	0.620805
	ENSMUSG00000083041.3	Gmfg-ps	0.24487	1.77046	2.02965	0.167126	0.475693
	ENSMUSG00000106678.2	Gm43457	0.244761	1.00228	1.85228	0.202958	0.517669
	ENSMUSG00000020431.6	Adcy1	0.244704	1.52448	1.19291	0.285583	0.599125
	ENSMUSG00000079457.12	Gm7609	0.24456	0.256206	0.296426	0.591154	0.823212
	ENSMUSG00000085894.2	Gm15832	0.24437	1.42125	1.49686	0.233029	0.551067
	ENSMUSG00000010044.13	Zmynd10	0.24435	3.93755	3.3842	0.078223	0.336159
	ENSMUSG00000032092.6	Mpzl2	0.244132	2.86477	2.38439	0.135634	0.43458
	ENSMUSG00000059713.13	Rcan3	0.243948	4.97222	8.82359	0.00665502	0.106169
	ENSMUSG00000040022.15	Rab11fip2	0.243931	4.24421	4.52018	0.0439783	0.260369
	ENSMUSG00000006651.9	Aplp1	0.243809	3.34092	2.2867	0.143541	0.444866
	ENSMUSG00000031398.14	Plxna3	0.243787	3.29296	8.33319	0.00810759	0.118999
	ENSMUSG00000059423.14	Zfp933	0.243654	3.35966	3.60535	0.0696775	0.318594
	ENSMUSG00000085287.10	4833418N02Rik	0.243566	1.80822	1.71626	0.202572	0.517217
	ENSMUSG00000027896.16	Slc16a4	0.243292	0.424139	0.748711	0.395449	0.691768
	ENSMUSG00000033102.16	Cdc14b	0.243242	4.39395	6.34828	0.0188124	0.176553
	ENSMUSG00000031144.16	Syp	0.24324	3.006	4.93974	0.03592	0.239329
	ENSMUSG00000050625.5	Ccdc121rt1	0.243019	2.41846	1.51925	0.229668	0.547299
	ENSMUSG00000021250.14	Fos	0.242959	6.61216	0.305486	0.585574	0.819446
	ENSMUSG00000090110.9	Cmc4	0.2429	2.63398	5.4671	0.0280385	0.21214
	ENSMUSG00000021023.15	Prorp	0.242835	2.97212	4.79323	0.0385291	0.246578
	ENSMUSG00000046585.10	Cfap58	0.242832	3.06883	2.76266	0.109492	0.394504
	ENSMUSG00000116836.2	Gm49727	0.24283	1.84327	2.33345	0.13969	0.440147
	ENSMUSG00000069008.4	Gm5537	0.24279	5.13266	0.937992	0.342451	0.649806
	ENSMUSG00000085614.3	1700123M08Rik	0.242597	1.37949	2.2081	0.150303	0.454385
	ENSMUSG00000028247.3	Coq3	0.242453	3.0969	2.8754	0.102875	0.382751
	ENSMUSG00000041046.8	Ramp3	0.242388	2.5307	1.38168	0.251342	0.568472
	ENSMUSG00000005968.15	Tuft1	0.242269	5.05879	8.24464	0.00840528	0.12091
	ENSMUSG00000118107.2	Gm34455	0.242017	0.102545	0.567927	0.458412	0.741438
	ENSMUSG00000029859.7	Epha1	0.242009	5.15628	12.4501	0.00171644	0.0499208
	ENSMUSG00000028549.18	Itgb3bp	0.241859	1.98205	2.60676	0.119477	0.411242
	ENSMUSG00000103711.2	Tstd1	0.241782	1.63465	1.61465	0.216016	0.531651
	ENSMUSG00000045404.17	Kcnk13	0.241353	2.36824	3.92988	0.0589928	0.295719
	ENSMUSG00000031351.16	Zfp185	0.241285	3.80741	8.41055	0.00785697	0.117004
	ENSMUSG00000039099.8	Wdr93	0.241279	1.9509	1.57154	0.222055	0.538601
	ENSMUSG00000071324.12	Armc2	0.240823	2.82625	2.38606	0.135503	0.434481
	ENSMUSG00000021898.17	Asb14	0.24081	1.92631	2.00718	0.169402	0.478868
	ENSMUSG00000067928.7	Zfp760	0.240766	3.99697	4.41055	0.0464057	0.266508
	ENSMUSG00000039021.16	Ttc16	0.240574	4.00971	4.01945	0.0563803	0.290085
	ENSMUSG00000113047.3	Gm47469	0.240545	3.4923	5.28815	0.0304731	0.220459
	ENSMUSG00000062949.14	Atp11c	0.240463	4.41535	1.75213	0.198076	0.511997
	ENSMUSG00000042857.5	Gm9776	0.240305	1.78103	2.23006	0.148376	0.451171
	ENSMUSG00000052713.10	Zfp608	0.24028	5.80627	7.30654	0.0124173	0.144944
	ENSMUSG00000036555.15	Iqce	0.240242	4.99385	21.4482	0.000105999	0.00866691
	ENSMUSG00000061576.16	Dpp6	0.240067	0.864312	0.681438	0.41722	0.709237
	ENSMUSG00000039795.15	Zfand1	0.239959	3.86715	10.8856	0.00301604	0.0690034
	ENSMUSG00000091811.3	Inafm1	0.239818	4.90689	8.48797	0.00761464	0.115152
	ENSMUSG00000021835.16	Bmp4	0.23977	6.22848	17.7771	0.000304486	0.0170808
	ENSMUSG00000120926.1	NA	0.239721	3.08623	4.19853	0.0515405	0.278173
	ENSMUSG00000026034.18	Clk1	0.239634	7.64067	29.7507	1.32014e-05	0.00257117
	ENSMUSG00000120697.1	NA	0.23946	0.106751	0.536825	0.470845	0.748797
	ENSMUSG00000120568.1	NA	0.239361	-0.242817	0.638014	0.432263	0.721714
	ENSMUSG00000054752.17	Fsd1l	0.239359	3.75145	5.46241	0.0280995	0.212296
	ENSMUSG00000009378.5	Slc16a12	0.239291	2.82524	4.99298	0.0350214	0.236806
	ENSMUSG00000047749.3	Zc3hav1l	0.238941	2.95364	4.42937	0.0459785	0.265915
	ENSMUSG00000043164.4	Tmem212	0.238914	4.53442	3.23205	0.0848	0.349702
	ENSMUSG00000025270.14	Alas2	0.238834	5.86548	0.706885	0.408776	0.703088
	ENSMUSG00000060240.13	Cend1	0.238795	0.0547632	1.4392	0.36455	0.667764
	ENSMUSG00000022805.18	Cfap91	0.23874	3.70709	3.43769	0.0760511	0.330808
	ENSMUSG00000038119.16	Cdon	0.2387	4.62637	11.4607	0.00244316	0.0612036
	ENSMUSG00000085376.2	Gm14508	0.238667	1.52486	1.80854	0.191252	0.503518
	ENSMUSG00000021704.9	Mtx3	0.238552	4.54915	8.96292	0.00629631	0.102757
	ENSMUSG00000050786.9	Ccdc126	0.238509	3.62642	11.5413	0.00237287	0.0601076
	ENSMUSG00000031893.8	Tsnaxip1	0.238316	2.96023	2.24625	0.146974	0.449955
	ENSMUSG00000087411.2	Gm16048	0.238157	1.69938	1.71504	0.202728	0.517333
	ENSMUSG00000032363.16	Adamts7	0.23806	2.10501	3.00483	0.0958436	0.371027
	ENSMUSG00000029082.18	Bst1	0.238049	4.65163	5.60001	0.0263705	0.206929
	ENSMUSG00000005124.11	Ccn4	0.237936	3.06405	0.689349	0.414566	0.707208
	ENSMUSG00000042429.9	Adora1	0.23788	3.30048	0.619795	0.438827	0.726169
	ENSMUSG00000026090.17	Cracdl	0.237851	5.25855	4.61169	0.0420611	0.256391
	ENSMUSG00000030386.20	Zfp606	0.237802	3.867	8.31865	0.00815567	0.118999
	ENSMUSG00000107182.2	Gm43268	0.237779	2.12265	2.25297	0.146397	0.449299
	ENSMUSG00000037211.13	Spry1	0.237693	7.01671	12.0295	0.00199159	0.0539409
	ENSMUSG00000079608.11	Stard6	0.23766	0.628388	1.31422	0.262931	0.580089
	ENSMUSG00000020629.13	Adi1	0.237567	5.40449	12.4777	0.00169985	0.0497723
	ENSMUSG00000035211.11	Xrra1	0.237454	0.632073	0.920058	0.347021	0.653324
	ENSMUSG00000041782.15	Lad1	0.237252	2.89799	1.19817	0.284548	0.598151
	ENSMUSG00000118132.2	4833408A19Rik	0.2372	0.258313	1.0743	0.338438	0.64675
	ENSMUSG00000027188.9	Pamr1	0.237157	5.70415	4.23801	0.0505377	0.275999
	ENSMUSG00000024646.15	Cyb5a	0.237126	7.44442	7.89816	0.00969117	0.12967
	ENSMUSG00000068522.5	Aard	0.237122	3.6451	6.5159	0.0174707	0.170421
	ENSMUSG00000054099.12	Slc25a40	0.23706	3.38474	7.84383	0.00991176	0.130754
	ENSMUSG00000045725.6	Prr15	0.236993	2.49665	3.36626	0.0789673	0.337896
	ENSMUSG00000074580.12	4931440P22Rik	0.236964	0.727348	1.26651	0.271548	0.587054
	ENSMUSG00000034438.17	Gbp8	0.236544	4.04285	1.27948	0.26917	0.585444
	ENSMUSG00000079470.9	Utp14b	0.236505	2.25754	2.85542	0.104013	0.384575
	ENSMUSG00000004933.18	Matk	0.236393	1.50685	1.09253	0.306321	0.618638
	ENSMUSG00000013089.16	Etv5	0.236367	7.65219	10.5804	0.00337844	0.0738721
	ENSMUSG00000037754.14	Ppp1r16b	0.236327	7.02962	14.8075	0.000772534	0.0311421
	ENSMUSG00000031478.17	Nek3	0.23629	2.12034	4.04395	0.0556888	0.288496
	ENSMUSG00000066000.13	Zfp979	0.236121	1.73232	0.562034	0.460726	0.742989
	ENSMUSG00000025077.15	Dclre1a	0.236052	3.7724	8.91762	0.00641056	0.103884
	ENSMUSG00000042156.17	Dzip1	0.235883	4.14817	6.99756	0.0141694	0.153849
	ENSMUSG00000005986.17	Ankrd13d	0.235845	2.22786	2.05257	0.164843	0.473232
	ENSMUSG00000120308.1	NA	0.235831	2.19253	3.6188	0.0691931	0.31737
	ENSMUSG00000056260.16	Lrif1	0.235702	4.36504	4.51731	0.0440401	0.260391
	ENSMUSG00000020882.18	Cacnb1	0.235593	3.81397	6.22374	0.0198831	0.181093
	ENSMUSG00000047022.19	Mipol1	0.235414	2.28919	2.44802	0.13076	0.428469
	ENSMUSG00000073433.12	Arhgdig	0.235412	4.07527	3.44488	0.0757643	0.330647
	ENSMUSG00000043020.14	Dnai3	0.235322	3.93187	2.80074	0.107203	0.390635
	ENSMUSG00000053062.17	Jam2	0.235319	6.24304	6.01827	0.0218004	0.18877
	ENSMUSG00000067279.4	Ppp1r3c	0.235259	4.61849	1.87181	0.183938	0.495244
	ENSMUSG00000076757.10	Trgc4	0.235107	0.454324	0.802544	0.379229	0.679156
	ENSMUSG00000110256.2	Gm45412	0.235087	0.363928	0.916438	0.347954	0.653911
	ENSMUSG00000039989.8	Cbx4	0.234959	5.52213	11.6448	0.00228583	0.0588745
	ENSMUSG00000078173.4	Lenep	0.234937	0.664388	0.13624	0.715284	0.887284
	ENSMUSG00000110682.2	A530010L16Rik	0.234837	0.498488	0.842995	0.367674	0.67023
	ENSMUSG00000085124.2	Gm12766	0.234757	-0.224376	0.607515	0.443341	0.729819
	ENSMUSG00000042564.14	Fam227a	0.234755	3.20751	4.62122	0.0418668	0.256257
	ENSMUSG00000059839.10	Zfp874b	0.234675	3.81276	7.31052	0.0123964	0.14488
	ENSMUSG00000074521.10	Gm14327	0.234595	0.641661	0.791758	0.382399	0.681703
	ENSMUSG00000066129.18	Kndc1	0.234258	4.19001	1.87119	0.184008	0.49527
	ENSMUSG00000031197.12	Vbp1	0.234197	4.95276	4.19719	0.0515747	0.278173
	ENSMUSG00000069808.14	Tlcd3a	0.234094	4.71704	1.42073	0.244934	0.561895
	ENSMUSG00000024505.17	Dtwd2	0.23407	1.83438	2.83928	0.104943	0.386004
	ENSMUSG00000022388.15	Ttll8	0.234067	-0.0923047	0.546289	0.467004	0.745838
	ENSMUSG00000081984.4	Dnajb3	0.234041	-0.222479	0.485865	0.492473	0.761645
	ENSMUSG00000003031.15	Cdkn1b	0.234039	6.2638	14.8948	0.000750853	0.0307962
	ENSMUSG00000039632.14	Odad3	0.233998	3.07048	2.49318	0.127428	0.42318
	ENSMUSG00000048240.15	NA	0.233771	2.94697	3.01011	0.095569	0.370603
	ENSMUSG00000033031.14	Cip2a	0.233768	2.05439	1.23639	0.277179	0.591643
	ENSMUSG00000038370.7	Pcp4l1	0.233643	6.51313	2.84677	0.10451	0.38536
	ENSMUSG00000071052.5	Rpl7a-ps5	0.233641	0.930491	1.01462	0.323844	0.63408
	ENSMUSG00000066894.15	Vsig10	0.233569	5.28787	20.4961	0.000138098	0.0101004
	ENSMUSG00000035764.6	Fbxo45	0.233538	4.95018	15.0551	0.000712707	0.0294144
	ENSMUSG00000029279.16	Brdt	0.233448	1.44634	2.272	0.144777	0.446677
	ENSMUSG00000021187.15	Tc2n	0.233431	3.67147	2.43823	0.131497	0.429017
	ENSMUSG00000087221.4	BC037032	0.233365	0.162101	0.789071	0.383195	0.682334
	ENSMUSG00000097119.3	B230354K17Rik	0.23328	3.5675	9.19589	0.00574299	0.0982715
	ENSMUSG00000040760.12	Appl1	0.233107	5.4047	16.0903	0.000511867	0.0241763
	ENSMUSG00000026839.18	Upp2	0.233051	1.7713	3.19011	0.114168	0.402151
	ENSMUSG00000097616.9	1110019D14Rik	0.232889	1.77785	1.45623	0.239288	0.557516
	ENSMUSG00000039633.8	Lonrf1	0.232831	3.63688	10.3147	0.00373289	0.0780483
	ENSMUSG00000025956.11	Mettl21a	0.232745	3.7464	7.92821	0.00957149	0.128914
	ENSMUSG00000120309.1	NA	0.232464	1.05055	1.32455	0.261111	0.579156
	ENSMUSG00000050714.10	Zbtb26	0.23245	2.80304	1.90607	0.18012	0.491155
	ENSMUSG00000112795.2	Gm2027	0.232372	-0.0391192	0.642599	0.430635	0.720685
	ENSMUSG00000023336.7	Wfdc1	0.232214	5.16129	1.67111	0.208414	0.522964
	ENSMUSG00000025789.10	St8sia2	0.232052	4.54426	4.9329	0.0360373	0.239595
	ENSMUSG00000100397.2	Gm28071	0.232051	0.228244	0.757771	0.392648	0.690131
	ENSMUSG00000055368.15	Slc6a2	0.23193	6.35963	2.0053	0.169595	0.479099
	ENSMUSG00000040543.17	Pitpnm3	0.231915	5.94689	16.7322	0.000418881	0.0211688
	ENSMUSG00000120373.1	NA	0.231835	-0.218372	0.522171	0.476898	0.753079
	ENSMUSG00000034429.16	Zfp707	0.23182	4.06912	12.7763	0.00153158	0.0467007
	ENSMUSG00000030752.9	Kdm8	0.231754	2.81661	4.2296	0.0507493	0.276051
	ENSMUSG00000063894.16	Zkscan8	0.23172	4.27595	2.2965	0.142723	0.443521
	ENSMUSG00000055069.4	Rab39	0.231719	0.247624	0.580397	0.453577	0.737206
	ENSMUSG00000044005.14	Gls2	0.231685	0.219292	0.627684	0.435966	0.724783
	ENSMUSG00000027963.15	Extl2	0.231567	4.07421	7.76855	0.0102266	0.132388
	ENSMUSG00000057440.9	Mpp7	0.231535	4.6273	5.92108	0.0227779	0.193339
	ENSMUSG00000037572.18	Wdhd1	0.231522	2.62836	1.79244	0.19317	0.505121
	ENSMUSG00000051116.7	Gm8121	0.231333	1.58283	1.41477	0.245897	0.562685
	ENSMUSG00000109179.3	Gm35339	0.231247	2.5506	4.91198	0.0363987	0.240356
	ENSMUSG00000021779.20	Thrb	0.231244	3.98105	6.40602	0.0183378	0.175113
	ENSMUSG00000022297.16	Fzd6	0.231222	5.43685	7.09894	0.0135661	0.152106
	ENSMUSG00000026301.17	Iqca	0.23122	3.60134	1.91224	0.179443	0.489991
	ENSMUSG00000054855.14	Rnd1	0.231045	4.60943	2.93973	0.0993081	0.376428
	ENSMUSG00000029059.10	Prxl2b	0.231037	2.60167	2.8413	0.104826	0.385787
	ENSMUSG00000020160.19	Meis1	0.230787	6.12629	13.5956	0.00115623	0.0391448
	ENSMUSG00000022833.8	Ccdc14	0.23064	3.03152	3.17263	0.0875395	0.354701
	ENSMUSG00000026723.11	Trdmt1	0.230598	3.6459	5.58584	0.0265429	0.207574
	ENSMUSG00000044309.9	Apol7c	0.230588	1.91092	0.608832	0.442854	0.729629
	ENSMUSG00000056832.15	Ttc26	0.230588	3.44423	3.59623	0.070008	0.319431
	ENSMUSG00000020948.10	Klhl28	0.230532	3.60858	7.58228	0.011054	0.137096
	ENSMUSG00000033318.8	Gstt2	0.230426	4.53679	5.25288	0.0309802	0.222919
	ENSMUSG00000058420.9	Syt17	0.230356	2.84417	3.27664	0.0828089	0.345965
	ENSMUSG00000006395.18	Hyi	0.230243	4.16309	10.4402	0.00356069	0.0760173
	ENSMUSG00000035112.18	Wnk4	0.230184	4.10704	3.79195	0.0632883	0.304648
	ENSMUSG00000042515.14	Pwwp3b	0.229938	2.14952	3.97442	0.057677	0.292689
	ENSMUSG00000030134.12	Rasgef1a	0.229922	6.98103	12.2612	0.00183453	0.051697
	ENSMUSG00000016493.14	Cd46	0.229701	2.89405	2.9105	0.100911	0.379762
	ENSMUSG00000020063.17	Sirt1	0.229433	4.83265	6.36233	0.0186956	0.176433
	ENSMUSG00000037151.9	Lrrc20	0.229397	4.56545	14.7962	0.000775412	0.0311856
	ENSMUSG00000020734.14	Grin2c	0.229389	0.382244	0.702843	0.4101	0.704317
	ENSMUSG00000035295.11	Wdr38	0.229339	1.16213	1.19639	0.284899	0.598574
	ENSMUSG00000084946.4	Dlx1as	0.229109	0.822904	0.94365	0.341027	0.648789
	ENSMUSG00000089661.10	Mia	0.229092	0.654215	1.0043	0.326266	0.636307
	ENSMUSG00000020258.17	Glyctk	0.229072	1.37812	1.61038	0.216604	0.532705
	ENSMUSG00000110165.3	Btf3-ps18	0.229028	0.0955213	0.917303	0.430666	0.720685
	ENSMUSG00000000056.8	Narf	0.228962	4.31402	7.78563	0.0101542	0.131994
	ENSMUSG00000082953.4	Gm13217	0.228913	-0.229321	0.348825	0.560298	0.805999
	ENSMUSG00000109168.2	Gm44709	0.22891	2.233	0.660623	0.424328	0.715009
	ENSMUSG00000061802.7	Odad2	0.228874	2.65768	1.5234	0.229052	0.546695
	ENSMUSG00000066068.6	Gm13611	0.228848	2.66829	2.27328	0.144669	0.446606
	ENSMUSG00000007480.7	Mc5r	0.228819	-0.294005	0.338908	0.565888	0.809331
	ENSMUSG00000024842.9	Cabp4	0.228737	0.120778	0.904031	0.40529	0.699313
	ENSMUSG00000023047.12	Amhr2	0.228711	1.96077	1.63128	0.21374	0.529509
	ENSMUSG00000022064.11	Pibf1	0.228702	3.3501	5.60949	0.0262558	0.206456
	ENSMUSG00000036615.8	Rfxap	0.22865	3.84178	6.78022	0.0155649	0.161946
	ENSMUSG00000020650.16	Bcap29	0.228578	4.35846	5.80645	0.0239941	0.198087
	ENSMUSG00000026097.10	Ormdl1	0.228553	3.73383	9.8192	0.00450776	0.0858654
	ENSMUSG00000097162.4	2310010J17Rik	0.228168	1.36374	1.88372	0.1826	0.493697
	ENSMUSG00000028434.13	Epb41l4b	0.2281	6.20945	14.5334	0.000845249	0.0328002
	ENSMUSG00000061724.6	Gm2423	0.228055	3.69901	1.03414	0.319329	0.629665
	ENSMUSG00000060380.4	C030014I23Rik	0.228047	2.45076	1.88632	0.182309	0.493559
	ENSMUSG00000035790.16	Cep19	0.227946	3.8392	12.3243	0.00179408	0.0514025
	ENSMUSG00000035615.13	Frmpd1	0.227908	3.38746	5.18974	0.0319118	0.226123
	ENSMUSG00000030158.13	Clec12b	0.227874	2.98749	1.63219	0.213618	0.5294
	ENSMUSG00000029375.7	Cxcl15	0.227874	10.4606	8.98873	0.00623223	0.102723
	ENSMUSG00000026955.14	Sapcd2	0.227859	1.2765	0.71709	0.405463	0.699402
	ENSMUSG00000092074.3	Dynlt1a	0.227668	2.6093	2.53925	0.12413	0.417557
	ENSMUSG00000026807.9	Ak8	0.227649	2.73674	1.74853	0.198521	0.512231
	ENSMUSG00000061451.14	Tmem151a	0.227593	3.81979	2.80231	0.10711	0.390461
	ENSMUSG00000042064.14	Myo3b	0.227473	-0.329076	0.313897	0.58049	0.817047
	ENSMUSG00000041757.18	Plekha6	0.227433	6.41567	5.51959	0.0273662	0.209475
	ENSMUSG00000059974.11	Ntm	0.227373	-0.274918	0.298077	0.590128	0.822159
	ENSMUSG00000097231.3	Gm26852	0.227333	1.32094	1.82907	0.18884	0.500833
	ENSMUSG00000030469.11	Zfp719	0.227162	3.60375	5.77778	0.0243094	0.199422
	ENSMUSG00000029130.13	Rnf32	0.227152	2.56165	2.89742	0.101638	0.380612
	ENSMUSG00000038903.14	Ccdc68	0.227142	3.78698	6.16388	0.0204216	0.18389
	ENSMUSG00000028919.12	Arhgef19	0.227088	4.17971	4.97804	0.035271	0.237064
	ENSMUSG00000038742.8	Angptl6	0.226964	0.208075	0.674114	0.4197	0.711283
	ENSMUSG00000024041.11	Cryaa	0.226802	0.621561	0.482409	0.494001	0.762376
	ENSMUSG00000071103.11	1700029J07Rik	0.226676	3.50886	4.61453	0.042003	0.256391
	ENSMUSG00000071855.6	Ccdc112	0.226642	2.63036	5.25061	0.0310132	0.222971
	ENSMUSG00000027276.8	Jag1	0.226578	5.39745	9.71423	0.00469358	0.0883371
	ENSMUSG00000109555.2	Gm44891	0.22645	1.31634	0.822086	0.373582	0.675097
	ENSMUSG00000058057.6	Mettl7a3	0.226434	0.553731	0.67729	0.418621	0.710366
	ENSMUSG00000003206.8	Ebi3	0.226347	1.81433	1.64717	0.211595	0.526747
	ENSMUSG00000041523.4	Upk2	0.226344	-0.0260909	0.505095	0.484118	0.756718
	ENSMUSG00000006389.14	Mpl	0.226341	0.0360438	0.319975	0.576872	0.815028
	ENSMUSG00000023992.15	Trem2	0.22632	2.37732	1.72327	0.201685	0.515735
	ENSMUSG00000029861.18	Fam131b	0.22625	0.0843198	0.768492	0.389372	0.687215
	ENSMUSG00000054814.15	Usp46	0.226119	5.76316	9.52878	0.0050427	0.0911934
	ENSMUSG00000089857.10	Zfp882	0.226114	1.76434	2.08876	0.161315	0.469391
	ENSMUSG00000117775.2	Gm50462	0.225751	1.97751	1.44314	0.241349	0.558924
	ENSMUSG00000090015.9	Gm15446	0.22552	3.5388	5.09925	0.0333018	0.231049
	ENSMUSG00000025395.15	Prim1	0.225383	2.85079	3.79384	0.063227	0.304523
	ENSMUSG00000055200.8	Sertad3	0.225102	3.6511	7.28993	0.0125052	0.145773
	ENSMUSG00000049800.14	Sertad2	0.224995	6.112	16.6158	0.000434276	0.0218195
	ENSMUSG00000026200.14	Glb1l	0.224942	3.98679	10.1105	0.00403296	0.0807749
	ENSMUSG00000006373.11	Pgrmc1	0.22485	7.74581	12.3114	0.00180229	0.0514763
	ENSMUSG00000021751.14	Acox2	0.224737	3.9308	1.96086	0.174213	0.484434
	ENSMUSG00000021611.10	Tert	0.224641	0.774903	1.07197	0.310819	0.621841
	ENSMUSG00000055862.8	Izumo4	0.224588	5.05987	9.95088	0.00428597	0.0837334
	ENSMUSG00000104943.2	Gm42868	0.22458	1.57397	1.65362	0.210733	0.525816
	ENSMUSG00000039760.9	Il22ra2	0.22454	0.676141	0.622824	0.437725	0.725907
	ENSMUSG00000021619.7	Atg10	0.224383	2.92462	5.2938	0.0303926	0.220153
	ENSMUSG00000085433.4	Gm16001	0.224368	0.918107	1.20147	0.283903	0.597559
	ENSMUSG00000025776.14	Crispld1	0.224227	0.582977	0.953261	0.338627	0.646948
	ENSMUSG00000031232.18	Magt1	0.224173	5.99289	8.74577	0.00686507	0.107748
	ENSMUSG00000048482.15	Bdnf	0.224068	4.48224	5.6453	0.0258276	0.205124
	ENSMUSG00000072640.12	Lyrm9	0.223997	3.497	3.93869	0.0587298	0.295336
	ENSMUSG00000042268.11	Slc26a9	0.223994	6.09637	5.7315	0.0248282	0.201014
	ENSMUSG00000084950.8	Gm5577	0.223889	1.24651	1.20136	0.283923	0.597559
	ENSMUSG00000035984.15	Nme5	0.2238	3.67104	3.13107	0.0895162	0.358852
	ENSMUSG00000027297.16	Ltk	0.223573	2.04843	2.86727	0.103336	0.383562
	ENSMUSG00000033446.8	Lpar6	0.223453	4.02757	4.63583	0.0415712	0.255349
	ENSMUSG00000036875.16	Dna2	0.223412	3.27685	2.71693	0.112316	0.399078
	ENSMUSG00000028524.22	Sgip1	0.223399	4.2836	7.36131	0.0121324	0.143374
	ENSMUSG00000059854.9	Hydin	0.223398	4.42301	2.31908	0.14086	0.441612
	ENSMUSG00000037025.12	Foxa2	0.223363	5.53872	10.9701	0.00292331	0.0675974
	ENSMUSG00000056185.6	Snx32	0.223334	4.07664	6.5651	0.0170973	0.169158
	ENSMUSG00000048406.6	B330016D10Rik	0.223331	2.04783	1.62682	0.214347	0.530505
	ENSMUSG00000057069.8	Ero1b	0.223322	5.23829	16.4024	0.00046413	0.0226626
	ENSMUSG00000029335.6	Bmp3	0.223196	6.26426	8.6456	0.00714625	0.110601
	ENSMUSG00000074829.11	2010315B03Rik	0.223068	4.07267	2.33662	0.139433	0.439996
	ENSMUSG00000054293.11	P2ry10b	0.223056	1.70467	1.82759	0.189013	0.500976
	ENSMUSG00000103400.3	Gm15853	0.223055	0.0595343	0.450163	0.508662	0.772855
	ENSMUSG00000000792.3	Slc5a5	0.222642	0.0265877	0.70922	0.467433	0.745989
	ENSMUSG00000096768.9	Gm47283	0.222569	7.76088	1.14489	0.295261	0.60864
	ENSMUSG00000056679.14	Gpr173	0.222504	0.981232	1.51051	0.230972	0.548147
	ENSMUSG00000050921.13	P2ry10	0.222291	3.32502	3.11927	0.0900868	0.359989
	ENSMUSG00000037262.8	Kin	0.222143	3.82133	7.51864	0.0113533	0.138396
	ENSMUSG00000020962.15	Gtf2a1	0.222123	5.48039	8.78269	0.00676453	0.107111
	ENSMUSG00000001604.15	Tcea3	0.222067	4.66069	6.19593	0.0201313	0.182361
	ENSMUSG00000078925.12	D030018L15Rik	0.222013	0.411222	0.768688	0.389312	0.687215
	ENSMUSG00000037826.6	Ppm1k	0.221701	4.38633	6.0969	0.0210434	0.186153
	ENSMUSG00000120248.1	NA	0.221637	0.07751	0.516354	0.479337	0.754537
	ENSMUSG00000022763.19	Aifm3	0.221548	1.16738	1.38839	0.250226	0.567279
	ENSMUSG00000043782.10	Bicdl2	0.221495	2.65265	3.25479	0.083778	0.348001
	ENSMUSG00000054196.8	Cthrc1	0.221443	1.96792	2.26847	0.145076	0.447224
	ENSMUSG00000036353.14	P2ry12	0.221367	1.49529	1.40799	0.247001	0.563838
	ENSMUSG00000041429.4	Nthl1	0.221321	2.76764	2.95062	0.098719	0.375484
	ENSMUSG00000024500.21	Ppp2r2b	0.22114	1.6174	1.35797	0.255337	0.572725
	ENSMUSG00000057265.14	Bbof1	0.22113	3.07316	2.20009	0.151013	0.455403
	ENSMUSG00000108621.3	Gm33989	0.220959	5.49058	8.43551	0.00777792	0.116314
	ENSMUSG00000036856.5	Wnt4	0.220816	4.69407	4.69435	0.0404097	0.251748
	ENSMUSG00000052676.17	Zmat1	0.220773	3.453	9.42593	0.00524853	0.0931198
	ENSMUSG00000024018.19	Ccdc167	0.220567	4.01881	9.49247	0.00511434	0.0920873
	ENSMUSG00000004371.16	Il11	0.220542	-0.0885692	0.677431	0.418574	0.710355
	ENSMUSG00000036934.10	4921524J17Rik	0.220486	3.43056	6.29974	0.0192219	0.178464
	ENSMUSG00000084289.2	Fth1-ps	0.220457	3.29654	2.60822	0.119379	0.411239
	ENSMUSG00000025436.13	Atp23	0.220444	1.72074	1.26005	0.272743	0.588049
	ENSMUSG00000015405.16	Ace2	0.220438	4.13064	7.35513	0.0121642	0.143565
	ENSMUSG00000002031.14	Ift46	0.220431	5.15309	11.9135	0.00207569	0.0554975
	ENSMUSG00000020808.4	Pimreg	0.22041	1.15933	0.546163	0.467054	0.745838
	ENSMUSG00000027533.11	Fabp5	0.220337	6.96614	2.4877	0.127827	0.42358
	ENSMUSG00000047044.8	D030056L22Rik	0.219951	4.43731	9.91066	0.00435241	0.0841251
	ENSMUSG00000020865.17	Abcc3	0.219928	5.90538	2.94615	0.0989602	0.375685
	ENSMUSG00000030554.17	Synm	0.219854	6.25977	10.6114	0.00333953	0.0734489
	ENSMUSG00000099338.3	2810030D12Rik	0.219826	2.17678	1.14356	0.295536	0.608917
	ENSMUSG00000097768.4	2310043M15Rik	0.219727	0.262544	0.248624	0.622584	0.838632
	ENSMUSG00000019564.13	Arid3a	0.219713	3.72652	2.51918	0.125554	0.420668
	ENSMUSG00000042195.10	Slc35f2	0.219643	0.0521373	0.471903	0.498696	0.7656
	ENSMUSG00000074212.8	Dnajb14	0.219634	5.00969	9.70086	0.00471785	0.0886015
	ENSMUSG00000028088.15	Fmo5	0.219573	5.7091	8.43453	0.00778103	0.116314
	ENSMUSG00000001025.9	S100a6	0.219372	7.60933	5.96212	0.0223593	0.191489
	ENSMUSG00000040713.13	Creg1	0.219355	6.95491	5.02099	0.0345586	0.235471
	ENSMUSG00000037358.7	Dipk2b	0.219326	2.00873	3.04304	0.0938754	0.366928
	ENSMUSG00000021226.8	Acot2	0.219145	4.30381	3.95378	0.0582826	0.294439
	ENSMUSG00000037762.7	Slc16a9	0.219099	7.1243	11.4868	0.00242018	0.0607992
	ENSMUSG00000038836.16	Agbl3	0.219086	2.68199	3.65496	0.0679098	0.314534
	ENSMUSG00000083829.2	Gm2199	0.219013	1.0051	0.878834	0.357857	0.661955
	ENSMUSG00000009394.14	Syn2	0.218969	3.93501	3.64133	0.0683904	0.315371
	ENSMUSG00000105263.2	Gm42427	0.218947	1.04519	1.41868	0.268665	0.585422
	ENSMUSG00000109572.2	Cfap99	0.218908	0.731117	1.02351	0.321777	0.631817
	ENSMUSG00000110266.2	Gm32742	0.218877	0.78025	0.953662	0.338527	0.646829
	ENSMUSG00000110424.3	Zbed5-ps	0.218875	0.673804	0.733543	0.400206	0.695246
[truncated: 15,335 more rows]

## Sheet: c DEGs BA.5+MPvsBA5 2dpi
	Ensembl_ID	HUGO_ID	logFC	logCPM	F	PValue	FDR	M1 BA.5+MP	M2 BA.5+MP	M3 BA.5+MP	M4 BA.5+MP	M5 BA.5+MP	M6 BA.5+MP	M1 BA.5-MP	M2 BA.5-MP	M3 BA.5-MP	M4 BA.5-MP	M5 BA.5-MP	M6 BA.5-MP
DEGs for BA.5+MP vs. BA.5, 2 dpi. Significant differentially expressed genes (EdgeR, FDR<0.05) from b. Viral read count was included as a term in the linear model for EdgeR analysis.	ENSMUSG00000023034.8	Nr4a1	1.52423	7.61326	33.4919	5.75594e-06	0.00159237	296.851	308.607	356.962	259.716	379.618	347.39	81.7067	113.801	136.576	63.9169	144.85	123.909
	ENSMUSG00000028195.5	Ccn1	1.43394	8.35613	22.0817	8.91839e-05	0.00763391	545.311	535.516	652.54	342.173	614.992	600.311	143.149	232.371	273.021	101.189	240.313	242.924
	ENSMUSG00000075605.4	Slurp2	1.40846	-0.371607	13.4866	0.0011998	0.0398807	1.54852	0.447663	1.18987	1.1153	0.63995	0.925602	0.519598	0.545152	0.390216	0.385041	0.348407	0.279705
	ENSMUSG00000098008.2	A930001A20Rik	1.25047	0.173825	13.8867	0.00104808	0.037001	1.31624	0.895325	1.46984	1.56142	0.76794	0.520651	0.389698	0.408864	0.780432	0.231025	0.696813	0.349632
	ENSMUSG00000087502.2	Gm16091	1.06367	1.04637	25.5844	3.58501e-05	0.00437624	3.09704	2.46214	2.37975	1.78448	2.94377	2.89251	1.29899	1.02216	1.30072	1.00111	1.48073	1.39853
	ENSMUSG00000087390.2	Gm7598	1.05684	0.189194	21.1088	0.000116398	0.00914717	1.85822	1.0632	1.32986	1.1153	1.53588	0.752052	0.844346	1.0903	0.715396	0.539058	0.435508	0.699263
	ENSMUSG00000034226.8	Rhov	1.04595	0.888399	14.6824	0.000804846	0.0317795	2.4002	1.62278	4.05957	3.34589	1.72787	1.7355	1.49384	1.90803	1.49583	1.15512	1.39363	0.629337
	ENSMUSG00000026398.15	Nr5a2	1.04386	0.45303	14.185	0.000948598	0.0350597	2.16792	0.951283	3.21966	1.56142	1.3439	1.7355	0.974245	0.477008	0.715396	1.07812	0.609712	1.25867
	ENSMUSG00000033730.5	Egr3	1.02608	3.14806	26.6166	2.77658e-05	0.00388139	12.6978	12.7584	9.86895	8.77368	18.3666	12.3221	7.01457	5.45152	4.94274	6.08365	7.75205	5.80388
	ENSMUSG00000106631.3	Gm42669	0.942877	0.4913	14.4222	0.000876822	0.0337003	1.7808	1.4549	1.95979	0.966592	1.47189	1.33055	0.454648	1.43102	0.910504	0.770083	1.04522	0.629337
	ENSMUSG00000090698.3	Apold1	0.862762	2.45876	13.5632	0.001169	0.0392602	9.21368	7.38643	8.32911	3.19719	6.65548	8.96677	4.67638	5.31523	4.48748	4.15845	4.61639	3.35646
	ENSMUSG00000074570.15	Cass4	0.85601	4.08828	79.8133	4.22534e-09	3.33854e-05	23.9246	20.4806	17.6381	22.1573	22.6542	21.4045	13.4446	14.651	11.5764	10.5501	11.6716	11.7476
	ENSMUSG00000055148.8	Klf2	0.815986	7.93599	63.6608	3.3007e-08	6.69877e-05	314.814	343.525	325.115	368.643	316.007	337.035	174.325	155.096	239.593	168.032	210.699	172.159
	ENSMUSG00000060579.14	Fhit	0.752016	0.578365	12.4537	0.00171426	0.0499208	2.32278	1.56682	0.979896	1.78448	1.66387	1.44625	1.0392	1.22659	1.17065	0.847091	0.958118	0.978968
	ENSMUSG00000042097.18	Zfp239	0.750746	0.902054	15.6092	0.000596276	0.0262999	2.86476	1.84661	2.09978	2.00754	1.66387	1.3884	1.29899	1.77174	1.43079	0.770083	1.48073	1.11882
	ENSMUSG00000121112.1	ENSMUSG00000121112.1	0.747748	1.63773	15.572	0.000603395	0.0263303	3.01961	2.5181	3.07967	3.12283	2.30382	3.81811	1.94849	2.11246	1.30072	1.92521	1.56783	1.67823
	ENSMUSG00000039377.8	Hlx	0.74524	5.33073	47.4521	3.99699e-07	0.000346419	52.3399	48.1237	35.2062	52.5677	52.8599	55.189	28.1232	28.4161	30.3718	26.7219	29.5275	30.9074
	ENSMUSG00000026826.14	Nr4a2	0.721069	3.8047	24.6955	4.48793e-05	0.00494389	16.4143	18.4101	17.7781	15.9116	20.2864	16.6608	9.9373	8.65429	10.4058	9.318	14.4589	9.78968
	ENSMUSG00000074912.12	Gm14207	0.720965	2.20732	16.3843	0.000466758	0.0227269	4.33585	5.42791	5.6694	8.77368	5.88754	5.32221	3.83203	2.79391	3.57698	5.00554	2.70015	2.51735
	ENSMUSG00000024136.15	Dnase1l2	0.70891	2.43299	24.6794	4.50637e-05	0.00494389	6.5812	7.55431	4.75949	5.65084	6.65548	7.52052	3.37738	4.29307	4.09727	3.92742	4.00668	3.9858
	ENSMUSG00000042851.18	Zc3h6	0.704539	2.89711	14.1885	0.0009475	0.0350597	7.97487	7.21856	8.95904	10.1864	9.08729	9.19817	6.10527	7.08698	4.94274	4.85152	4.44218	5.38433
	ENSMUSG00000037681.14	Esyt3	0.69257	4.09017	38.4974	2.06182e-06	0.000910076	21.2921	20.1448	22.7476	18.6627	16.3827	17.5864	16.3673	12.6748	11.1862	10.3961	12.6297	11.9574
	ENSMUSG00000086868.2	Gm15883	0.680934	3.57311	13.4326	0.00122206	0.0402723	9.60081	12.4226	19.038	15.1681	12.607	15.2146	5.97537	7.01884	9.43022	7.85484	7.05523	10.4889
	ENSMUSG00000035910.16	Dcdc2a	0.679526	3.05932	23.7502	5.72647e-05	0.00586908	8.05229	7.33048	6.99925	9.07109	6.91146	7.05772	4.35163	4.56565	4.35741	4.6205	5.4003	4.54521
	ENSMUSG00000037847.15	Nmrk1	0.676212	2.4387	25.0978	4.05186e-05	0.00471375	6.65863	4.98025	7.76917	6.54308	4.79963	6.47921	4.61143	5.7241	4.48748	4.31246	3.04856	3.28654
	ENSMUSG00000038801.7	Scgb1c1	0.672826	2.80523	12.4595	0.00171079	0.0499208	9.05883	9.56879	11.6188	12.5657	6.97546	8.50397	7.66406	7.49584	6.56864	6.00665	4.87769	5.52418
	ENSMUSG00000006235.7	Epor	0.660775	2.25458	20.5787	0.000134932	0.00994062	5.41981	4.53258	7.13924	7.65838	5.1836	5.26436	4.15678	4.56565	4.35741	2.7723	3.30986	3.63617
	ENSMUSG00000030093.8	Wnt7a	0.643028	3.91817	27.8489	2.06111e-05	0.00319492	18.6596	20.8163	15.8883	16.6551	19.7105	14.0576	15.0683	12.5385	12.9422	9.62604	12.891	9.71976
	ENSMUSG00000063632.7	Sox11	0.640212	4.66269	16.8875	0.000399258	0.0206589	34.6868	31.0006	20.9978	29.8156	33.9814	29.2722	19.6798	24.6681	19.7059	19.6371	14.7202	21.7471
	ENSMUSG00000103857.2	Gm37249	0.634415	1.62057	12.9911	0.00142175	0.0445653	3.87129	3.13364	3.42963	3.94072	3.07176	2.31401	2.33819	2.38504	2.79655	1.54017	2.09044	2.23764
	ENSMUSG00000041695.3	Kcnj2	0.634363	4.53559	15.1647	0.00068785	0.0285646	39.0226	28.5385	25.6873	20.5958	21.8863	27.1317	19.8097	17.513	19.3157	19.6371	19.2495	16.153
	ENSMUSG00000025105.11	Bnc1	0.629291	2.38476	17.9968	0.000285049	0.0163611	6.73605	4.86833	7.34922	5.7252	5.95154	5.14866	3.89698	5.58781	3.9672	4.23546	3.65827	3.56624
	ENSMUSG00000018451.8	6330403K07Rik	0.619704	1.69529	13.933	0.00103193	0.0366547	3.94872	2.68598	3.63961	4.08943	3.64772	2.48756	1.88354	1.90803	2.21122	2.61828	2.43885	2.16772
	ENSMUSG00000018387.13	Shroom1	0.604882	2.43115	14.1939	0.000945789	0.0350597	5.65209	4.70046	6.99925	7.21226	5.1196	6.47921	5.13103	5.58781	4.42245	3.00332	3.74537	3.35646
	ENSMUSG00000078202.4	Nrarp	0.604047	5.78697	27.3055	2.34832e-05	0.00347912	66.5863	69.2758	71.3924	76.1377	62.6511	63.0566	42.8018	44.1573	45.7853	48.7462	44.0734	42.5152
	ENSMUSG00000036144.7	Meox2	0.601937	4.54194	56.1249	9.86757e-08	0.00013282	31.5898	25.9085	22.8876	25.8006	27.5179	23.8343	18.9653	20.0343	20.4863	20.8692	16.1138	14.8244
	ENSMUSG00000097183.4	Gm17501	0.591746	2.5441	22.9181	7.12716e-05	0.00682553	7.89744	6.99473	7.4892	6.61743	7.29543	8.90892	4.80628	5.38338	5.91828	4.69751	5.139	4.68506
	ENSMUSG00000078137.2	Ankrd63	0.591743	4.86124	22.8598	7.23837e-05	0.00684014	29.809	33.5187	33.2465	50.3371	38.653	27.1317	19.9396	22.0787	27.5102	22.4094	22.9077	22.0268
	ENSMUSG00000034460.10	Six4	0.5879	3.0788	12.6123	0.00162165	0.0483816	10.6073	8.61751	10.3589	11.153	7.6794	8.90892	6.68982	6.74626	5.91828	7.31579	5.92291	6.01366
	ENSMUSG00000113019.3	Gm47467	0.587772	1.91214	13.9562	0.00102393	0.0366547	3.71644	3.86109	3.7096	3.56895	4.67164	4.16521	2.33819	2.86205	2.5364	2.31025	3.48407	2.23764
	ENSMUSG00000049038.4	Mterf2	0.583409	2.69271	22.3817	8.22526e-05	0.00732277	9.05883	6.82686	7.76917	6.46873	8.51134	7.52052	6.30012	5.51967	5.91828	4.46648	4.09378	6.01366
	ENSMUSG00000093594.2	Gm20707	0.581239	1.39015	16.1266	0.000506048	0.024026	4.02615	2.5181	3.00968	2.00754	2.81578	2.1983	2.01344	1.77174	2.08115	1.8482	2.00334	2.02786
	ENSMUSG00000025213.12	Kazald1	0.581029	3.2776	13.0777	0.00137993	0.0439217	8.9814	9.45687	13.7885	18.0678	9.08729	9.42957	5.65062	7.29141	7.219	8.62493	6.44552	7.41219
	ENSMUSG00000022144.5	Gdnf	0.572512	3.54692	22.3395	8.31898e-05	0.0073572	14.5561	16.4516	16.2383	11.7478	12.671	10.9337	11.4961	8.99501	8.77986	8.31689	11.0619	8.88064
	ENSMUSG00000003541.7	Ier3	0.55441	7.05357	30.1173	1.21383e-05	0.00253018	169.64	166.083	183.94	172.202	168.179	135.716	131.328	162.66	136.836	104.885	100.08	107.756
	ENSMUSG00000100005.9	B130024G19Rik	0.554136	3.63827	42.9671	8.8372e-07	0.000567805	15.3303	12.9822	13.5086	15.6142	14.8468	13.8262	11.1713	10.2897	10.6659	9.54903	10.6264	8.2513
	ENSMUSG00000035104.15	Eva1a	0.553976	2.80847	14.3655	0.000893449	0.0341878	9.67824	6.65898	8.74907	8.92238	9.72724	6.94202	6.23517	5.45152	6.82878	7.31579	4.35508	5.66403
	ENSMUSG00000102202.3	Gm33280	0.550248	1.15866	13.6494	0.00113536	0.0388955	3.25189	1.90257	2.44974	2.2306	2.81578	2.14045	1.23404	1.63546	1.88604	1.77119	1.82913	1.88801
	ENSMUSG00000027796.3	Smad9	0.541119	3.62173	37.4948	2.51486e-06	0.000990742	14.3238	14.661	13.1586	13.3836	13.439	12.727	10.7167	10.6986	9.17007	8.16288	9.23278	9.78968
	ENSMUSG00000026628.14	Atf3	0.538459	5.19492	17.446	0.000336548	0.0184261	67.8251	44.4305	55.0141	41.4147	55.8037	36.7348	55.3371	39.728	47.8665	34.7307	41.5475	22.5163
	ENSMUSG00000025578.10	Cbx8	0.538053	2.95455	30.9302	1.00973e-05	0.00233369	9.05883	8.56155	8.3991	7.95579	7.35943	7.69407	5.06608	6.26925	5.5931	5.08255	5.139	6.78285
	ENSMUSG00000043644.6	0610009L18Rik	0.534801	1.82016	22.846	7.26506e-05	0.00684014	4.4907	4.08492	3.07967	4.08943	3.8397	4.04951	2.85779	2.99834	2.66648	2.46426	2.96146	2.6572
	ENSMUSG00000038233.11	Gask1a	0.532603	3.38233	15.7876	0.000563322	0.0255695	10.1428	11.1356	13.0186	13.681	10.5592	9.66097	6.68982	6.67811	8.58475	8.54792	7.22944	7.90167
	ENSMUSG00000020105.10	Lrig3	0.529888	3.87791	29.4252	1.42304e-05	0.00271066	16.1046	16.1159	17.7781	19.3318	17.5346	18.2228	9.9373	11.7208	14.1128	11.8593	10.5393	12.8664
	ENSMUSG00000038253.7	Hoxa5	0.525348	5.29587	28.2238	1.88529e-05	0.00302589	45.6038	47.8439	49.7647	55.7649	46.1404	41.7678	30.7212	34.2764	37.8509	29.8792	27.6983	37.8301
	ENSMUSG00000078552.11	Dcdc2b	0.520766	2.59734	13.0756	0.00138095	0.0439217	8.05229	5.87557	7.20923	6.39437	4.86362	5.43791	4.74133	6.06482	4.48748	4.31246	4.35508	4.33543
	ENSMUSG00000032487.9	Ptgs2	0.513278	3.98908	12.9624	0.00143593	0.0446865	28.9573	17.6267	25.6873	11.8222	18.6865	15.041	20.4592	20.3069	17.6898	12.0903	13.7621	12.7965
	ENSMUSG00000104950.2	4833413G10Rik	0.500909	2.59947	13.9606	0.00102244	0.0366547	5.96179	7.27452	7.34922	7.06355	6.27151	5.78501	4.93618	5.1108	4.48748	4.77451	3.83247	5.03469
	ENSMUSG00000024042.8	Sik1	0.500214	7.06896	40.52	1.39474e-06	0.000696987	167.472	161.159	147.054	180.53	146.805	146.997	109.31	94.5158	117.39	114.665	120.462	106.708
	ENSMUSG00000035936.7	Aldh5a1	0.497495	3.81489	16.5406	0.00044455	0.022207	13.4721	14.1014	17.4981	22.529	14.4629	13.5948	12.1456	9.60831	9.30015	11.6283	8.88437	12.307
	ENSMUSG00000040321.4	Zfp770	0.489856	3.28133	21.371	0.000108272	0.00877003	11.6139	10.7439	10.7789	11.376	9.34327	11.9171	10.0023	9.06316	8.97497	7.77784	6.88103	6.85278
	ENSMUSG00000019256.18	Ahr	0.480062	6.24212	15.7288	0.000573965	0.0257988	95.079	81.9782	81.8913	94.726	97.2724	90.2462	59.4939	62.4199	54.1099	64.995	62.2777	74.6813
	ENSMUSG00000052861.14	Dnah6	0.478067	4.85158	17.0146	0.000383948	0.0202291	29.1121	27.3074	29.9568	28.9977	22.5262	23.545	19.42	22.215	18.3401	18.405	19.8592	19.7891
	ENSMUSG00000021928.10	Ebpl	0.473058	3.14315	18.4786	0.000246997	0.0152365	10.2976	8.2258	10.2889	11.5247	8.38335	8.09902	8.57336	8.17728	7.08892	6.16066	6.44552	6.43322
	ENSMUSG00000026819.16	Slc25a25	0.464048	5.61784	39.8807	1.57598e-06	0.000722081	65.6572	54.2231	59.1437	57.5494	60.0273	54.4948	50.7257	45.9291	52.484	40.2753	44.5089	36.7812
	ENSMUSG00000022203.8	Efs	0.463457	3.67796	13.1567	0.00134295	0.0429498	13.7818	12.9822	18.548	19.3318	11.1351	12.5535	9.4177	11.6526	10.7309	11.2432	9.23278	10.8386
	ENSMUSG00000022758.15	P2rx6	0.463427	3.76663	16.0659	0.000515818	0.0242422	14.8658	14.549	17.0782	15.7629	10.2392	13.8262	9.5476	9.40388	8.64979	10.4731	9.66828	12.5168
	ENSMUSG00000045875.14	Adra1a	0.458029	4.03531	16.3611	0.000470152	0.0228281	18.6596	14.9967	16.3783	23.793	18.6865	17.0658	15.3281	14.2421	12.0967	13.3994	12.2813	12.5867
	ENSMUSG00000034522.11	Zfp395	0.442525	5.69653	29.0734	1.54417e-05	0.00271519	47.7718	56.1817	58.8637	74.3532	55.8677	51.718	38.9049	42.6582	41.2328	37.58	40.0668	43.9137
	ENSMUSG00000069727.6	Zfp975	0.440139	3.29195	27.8128	2.07899e-05	0.00319492	13.1624	11.5273	9.58898	11.8965	12.1591	10.7023	7.59911	8.65429	8.06446	8.85595	8.10045	9.50998
	ENSMUSG00000057719.12	Sh3rf2	0.435557	5.29174	41.4824	1.16318e-06	0.000665713	47.4621	47.0046	45.0052	43.9427	49.2762	37.9497	40.2039	35.2305	31.2823	35.6548	32.0534	32.5857
	ENSMUSG00000024986.13	Hhex	0.43501	4.59354	20.7796	0.000127555	0.00966614	34.8416	24.0619	24.2874	25.7262	24.1261	26.9003	22.2777	25.0089	17.8849	19.5601	18.03	21.3275
	ENSMUSG00000038042.12	Ptpdc1	0.43363	4.00619	48.7026	3.23304e-07	0.000323744	18.5048	18.9137	18.2681	18.8857	17.2787	15.7931	14.0941	13.4925	14.1778	12.6294	13.675	13.0063
	ENSMUSG00000032392.12	Parp16	0.43165	3.35044	14.0322	0.000998216	0.0363033	10.8396	9.6807	12.6686	15.0937	10.0472	10.413	8.89811	8.44986	8.77986	9.318	7.92625	7.34226
	ENSMUSG00000042826.14	Fgf11	0.430603	3.95127	13.3904	0.00123975	0.0405469	15.7175	17.5148	20.9278	21.9342	14.7189	14.1154	12.925	11.0393	12.4869	13.6305	11.2361	13.9153
	ENSMUSG00000029695.14	Aass	0.428906	3.16451	15.2559	0.000667883	0.0280019	12.543	9.79262	8.4691	11.0786	9.66325	8.67752	9.5476	8.44986	8.06446	8.31689	7.31654	6.29337
	ENSMUSG00000056267.15	Cep70	0.424387	4.17578	16.3226	0.000475856	0.0229763	19.8985	17.6827	24.1474	17.9191	18.8785	18.4542	14.5487	17.036	14.8282	13.2454	14.6331	15.1041
	ENSMUSG00000034110.9	Kctd7	0.419329	3.77434	19.3737	0.000190144	0.0124847	14.0141	15.0527	13.3686	17.6961	16.2547	13.132	9.6775	11.1756	11.3813	11.9363	10.0167	11.5378
	ENSMUSG00000021701.9	Plk2	0.409186	6.46642	12.6908	0.00157784	0.0474833	113.119	92.1625	85.3209	112.422	104.824	100.601	70.9251	87.0881	66.0766	71.8487	73.9493	86.2191
	ENSMUSG00000015619.11	Gata3	0.397222	3.9025	15.9585	0.000533628	0.0246664	17.1885	16.1718	12.5987	13.6066	14.6549	16.5451	14.2889	14.174	10.926	10.0881	11.7587	11.1882
	ENSMUSG00000031517.9	Gpm6a	0.395711	5.67427	32.8261	6.64418e-06	0.00171896	71.2318	60.3785	58.0238	54.1291	52.9879	47.8421	59.2341	58.9446	49.6875	47.7451	40.1539	37.6903
	ENSMUSG00000022323.12	Rida	0.395365	3.35168	17.4418	0.000336972	0.0184261	10.7622	12.3667	12.1087	13.3092	9.72724	10.0081	8.37851	9.88088	7.93439	8.93296	7.75205	8.95057
	ENSMUSG00000035067.10	Xkr6	0.394189	2.56197	13.3076	0.00127531	0.04132	7.97487	6.7709	6.71928	6.46873	6.27151	5.09081	4.87123	5.04266	5.65813	5.46759	5.4874	4.61514
	ENSMUSG00000044937.16	Ttc41	0.389035	2.37592	13.6162	0.00114819	0.0390248	6.11665	5.31599	5.52941	4.6099	4.92762	5.72716	4.41658	4.0205	3.64202	4.00443	4.52929	4.19558
	ENSMUSG00000022253.18	Nadk2	0.387877	4.25982	19.7507	0.000170606	0.0116209	22.6858	17.6827	20.3678	21.265	22.1423	21.4624	18.5756	19.0122	15.9338	18.328	14.2847	14.3349
	ENSMUSG00000029135.11	Fosl2	0.380692	6.48796	39.8788	1.57656e-06	0.000722081	115.907	101.619	108.068	103.797	113.655	100.081	99.5029	94.9246	93.7169	82.1678	88.4953	67.8984
	ENSMUSG00000060487.8	Samd5	0.379943	4.3491	15.9693	0.000531795	0.0246474	27.3313	25.4608	23.5175	21.7111	23.1022	21.8095	21.5633	18.6715	18.6003	21.4083	15.7654	18.3906
	ENSMUSG00000038068.16	Rnf144b	0.376283	5.45292	37.2383	2.64739e-06	0.00101542	47.1524	45.7175	53.8243	53.4599	54.5878	50.561	35.5275	37.0704	40.8426	38.5811	38.4989	40.0678
	ENSMUSG00000034758.13	Tle6	0.373852	3.56338	15.8968	0.000544139	0.0248868	11.3816	12.9263	16.0283	14.1271	12.287	11.1072	10.5218	9.06316	10.7309	10.6271	8.62306	10.1393
	ENSMUSG00000021127.8	Zfp36l1	0.3735	8.38296	16.1188	0.000507298	0.024026	356.856	372.231	418.905	391.916	375.779	357.282	268.632	336.904	322.839	258.979	297.017	293.201
	ENSMUSG00000033114.12	Slc35d2	0.369709	3.06698	12.9503	0.00144195	0.0447935	9.44596	8.00197	10.7789	10.2607	9.0233	6.94202	7.85891	7.29141	6.95885	6.62271	7.83915	6.50315
	ENSMUSG00000031736.13	Crnde	0.36767	3.41666	13.9357	0.001031	0.0366547	14.3238	10.0165	12.1087	11.153	10.7512	12.4956	7.79396	9.40388	10.796	9.39501	8.53596	9.85961
	ENSMUSG00000037573.6	Tob1	0.361533	5.63173	27.7279	2.12162e-05	0.00322598	53.5013	54.8946	50.8146	59.7056	52.0919	57.6766	43.5163	41.0227	42.2734	41.3534	41.0249	43.0746
	ENSMUSG00000062931.16	Zfp938	0.361416	2.81961	13.2926	0.00128184	0.0414543	9.13625	8.2258	6.92926	6.54308	8.38335	6.36351	8.05376	7.56399	7.28403	5.92964	5.139	5.5941
	ENSMUSG00000043015.16	Nemp2	0.360432	3.94524	17.8391	0.00029886	0.0169341	17.0337	14.2133	13.9285	16.5808	18.3026	13.5948	12.925	14.3102	12.3568	13.0144	11.4974	11.6777
	ENSMUSG00000050069.4	Grem2	0.355934	6.66006	22.9296	7.10545e-05	0.00682553	121.172	109.733	130.326	125.508	114.935	88.8578	94.177	103.374	83.2461	95.0282	92.2407	86.4289
	ENSMUSG00000018209.16	Stk4	0.352981	6.98552	20.0656	0.000155956	0.0107967	141.38	119.302	136.695	150.788	159.924	130.51	128.406	109.167	99.8302	107.581	101.822	113.63
	ENSMUSG00000032841.16	Prr5l	0.352692	5.23645	12.868	0.00148359	0.0457803	44.1328	41.9124	40.5957	41.6378	49.1482	44.2553	33.7738	36.3208	33.8187	34.3457	35.6246	32.9353
	ENSMUSG00000046916.10	Myct1	0.350527	6.29716	17.6487	0.000316508	0.0175844	93.2208	86.4548	77.2018	89.1495	91.7049	87.2958	68.0023	71.0742	60.4184	69.0764	67.8522	73.2828
	ENSMUSG00000074217.9	Misp3	0.349678	3.81477	14.438	0.000872275	0.0336	16.6466	16.6754	14.8384	16.5808	14.3989	17.2393	10.9115	11.4482	13.2673	14.9396	9.84249	13.7755
	ENSMUSG00000030494.14	Rhpn2	0.348316	4.35712	22.4437	8.08931e-05	0.00726529	23.7697	21.5997	23.4475	23.4213	21.5023	19.7269	19.0952	22.8964	18.6003	17.1728	17.7687	15.6635
	ENSMUSG00000042453.15	Reln	0.346563	3.05025	13.627	0.001144	0.0389588	9.98794	9.06517	9.09903	8.17885	8.12737	9.19817	7.07952	8.10914	6.69871	7.39279	8.01335	6.22344
	ENSMUSG00000024186.16	Rgs11	0.344737	5.18061	25.329	3.82226e-05	0.00460105	39.1775	37.5477	41.9255	39.9277	36.8611	33.3795	30.7862	31.21	33.1033	31.9584	29.5275	28.1104
	ENSMUSG00000053040.14	Aph1c	0.338377	3.77346	16.4119	0.000462757	0.0226594	14.5561	14.0454	15.3984	16.3577	13.375	14.0576	11.3662	12.1978	10.861	11.4742	11.4103	11.6777
	ENSMUSG00000037818.17	Abhd18	0.332114	3.06459	12.5135	0.00167864	0.0494017	8.20714	8.50559	9.72896	8.84803	9.0233	8.73537	7.72901	6.88255	6.11338	7.08476	6.09712	7.69189
	ENSMUSG00000020877.12	Scrn2	0.331922	3.41708	16.5282	0.000446272	0.022229	10.5299	10.7439	12.1787	13.0862	10.4312	11.1072	8.57336	9.7446	9.88547	8.77894	9.31988	7.9716
	ENSMUSG00000032491.15	Nradd	0.324828	3.70279	16.4785	0.000453232	0.0224467	15.8723	12.8703	13.9985	14.3502	14.2069	13.0163	11.4961	12.1978	14.1128	9.85706	10.278	11.8875
	ENSMUSG00000024027.9	Glp1r	0.321458	7.6865	18.2112	0.000267384	0.0157341	228.639	257.686	203.258	239.789	228.334	223.938	171.467	189.645	161.029	185.513	163.664	213.765
	ENSMUSG00000017418.15	Arl5b	0.320465	5.27337	14.3222	0.000906335	0.0344527	46.8427	43.815	42.2055	40.8199	47.9323	45.8173	39.0997	37.4111	34.0138	32.1895	37.8021	36.3617
	ENSMUSG00000052302.7	Tbc1d30	0.319192	5.37036	30.4491	1.12556e-05	0.00250133	44.2876	47.5642	42.9054	40.2251	45.6924	42.8091	32.3449	32.3003	36.0299	35.5778	37.6279	35.7323
	ENSMUSG00000018648.16	Dusp14	0.317446	5.27015	32.8929	6.54875e-06	0.00171896	48.2363	42.5839	43.3954	42.4557	42.3007	36.3877	36.8265	36.6615	33.9488	35.5778	35.2762	33.215
	ENSMUSG00000027551.16	Zfp64	0.317	4.25758	14.2141	0.000939469	0.0349458	18.5048	19.4174	21.2077	23.1982	22.7822	19.7847	17.6014	18.2626	18.5353	15.8637	15.2428	16.0131
	ENSMUSG00000078607.7	1810010H24Rik	0.31686	5.578	15.7259	0.000574498	0.0257988	52.8045	52.3206	52.6344	59.7056	44.9885	42.9826	38.1255	43.9529	44.8748	40.8144	43.4637	37.6204
	ENSMUSG00000029403.15	Cdkl2	0.316425	4.61072	16.0228	0.000522889	0.0244025	30.4284	29.154	22.4676	23.0495	26.302	25.2805	22.5375	25.2133	21.722	20.0992	19.8592	22.2366
	ENSMUSG00000022048.9	Dpysl2	0.314594	7.10333	27.1957	2.41152e-05	0.0035227	175.757	158.361	146.354	152.127	137.525	133.749	133.796	140.854	142.039	125.138	125.165	106.218
	ENSMUSG00000058192.17	Zfp846	0.31182	3.48031	14.6465	0.000814382	0.0319745	13.2398	11.5833	11.0588	11.6735	10.8792	11.8014	10.7816	10.3579	10.0806	8.31689	9.14567	9.71976
	ENSMUSG00000000276.12	Dgke	0.310031	4.97609	21.2301	0.000112561	0.00899135	35.7708	32.2877	32.8265	37.9201	33.5974	34.9993	29.4222	29.7108	26.0794	31.0343	24.6498	27.481
	ENSMUSG00000113204.3	Gm46430	0.306742	4.28052	16.7826	0.000412401	0.0210252	21.0598	21.3199	20.0179	21.4881	24.1901	19.7847	19.6798	19.0803	17.0394	15.0936	17.2461	17.4816
	ENSMUSG00000036528.17	Ppfibp2	0.306185	5.54038	33.4664	5.78744e-06	0.00159237	51.1011	46.389	52.8444	50.8576	49.1482	48.5363	37.8007	44.4299	38.8265	38.6582	41.0249	41.6761
	ENSMUSG00000041119.13	Pde9a	0.300312	5.28388	13.2701	0.00129177	0.0416946	39.4872	41.7445	48.3648	46.322	39.9329	42.9248	28.448	39.3872	35.4446	34.7307	35.0149	34.8233
	ENSMUSG00000022893.15	Adamts1	0.298597	7.28938	16.7336	0.000418704	0.0211688	175.37	183.262	157.343	167.89	191.153	194.203	138.992	152.029	137.096	131.53	160.441	142.65
	ENSMUSG00000026632.18	Tatdn3	0.293183	3.17646	13.0533	0.00139159	0.0440434	9.36853	9.45687	10.1489	9.51721	9.0233	9.60312	8.76821	7.49584	8.77986	7.23878	7.83915	7.27234
	ENSMUSG00000054021.7	Sirt5	0.291078	3.43127	15.2826	0.000662137	0.0280019	11.1493	11.0237	12.1787	13.3092	11.1351	11.2808	9.87235	8.92687	9.17007	8.85595	9.05857	10.1393
	ENSMUSG00000021466.13	Ptch1	0.289865	6.44631	24.7621	4.41237e-05	0.00490282	88.1107	89.9242	95.8898	105.284	98.3603	91.4032	60.8579	70.9379	70.9543	80.2426	80.3077	81.8837
	ENSMUSG00000021245.16	Mlh3	0.289532	4.0691	18.9693	0.000213839	0.0135776	17.7305	17.1791	17.7781	19.7036	18.2386	17.8178	15.0683	14.4465	13.1373	15.4787	14.2847	14.9642
	ENSMUSG00000030067.18	Foxp1	0.288777	6.85403	13.6493	0.00113541	0.0388955	120.552	120.701	134.666	140.676	136.053	118.94	108.336	120.002	102.172	99.9567	99.2088	107.477
	ENSMUSG00000044433.17	Camsap3	0.287711	5.0237	14.0244	0.00100081	0.0363033	27.7185	34.5819	40.7357	36.6561	33.9814	36.7348	27.6686	27.7346	25.8843	28.5701	25.4337	30.4179
	ENSMUSG00000045205.17	Dpy19l4	0.283576	4.73078	20.1575	0.000151941	0.0105859	33.6803	28.4825	27.857	26.5441	32.1895	29.1565	24.551	25.4859	24.5186	25.1047	22.4722	26.7119
	ENSMUSG00000000901.18	Mmp11	0.283424	5.74261	15.4491	0.000627621	0.0270627	55.7466	54.9506	59.3537	72.8661	57.7875	48.9991	46.8287	48.0415	45.3301	44.4338	45.7284	51.5357
	ENSMUSG00000038982.11	Bloc1s5	0.282892	4.18824	13.5305	0.00118203	0.0395545	19.5887	18.634	22.0476	19.3318	19.1345	18.9748	19.355	15.1961	15.6086	16.4798	14.8073	16.2928
	ENSMUSG00000025931.16	Paqr8	0.281935	5.22447	14.7557	0.000785736	0.0313325	37.8613	41.5207	47.5949	36.1357	41.2128	41.305	32.6697	29.4382	32.2579	34.5767	31.705	37.0609
	ENSMUSG00000039485.9	Tspyl4	0.280322	5.24508	14.1561	0.000957772	0.0352484	41.9648	41.129	34.3663	37.5484	40.3809	34.5365	32.28	31.687	34.4691	29.2631	34.9278	30.6977
	ENSMUSG00000052137.12	Rbm12b2	0.280076	4.61972	15.7128	0.000576896	0.0258352	27.9507	24.7334	26.3172	24.4622	29.2457	28.9251	25.3304	24.8726	21.657	21.7163	23.3432	20.2786
	ENSMUSG00000027883.16	Gpsm2	0.279878	4.5908	14.637	0.000816933	0.0319745	26.1699	24.6214	24.3574	24.5366	26.8779	26.5532	19.1602	18.944	23.3479	23.4875	21.427	19.5094
	ENSMUSG00000023963.11	Cyp39a1	0.278172	4.51674	14.8912	0.000751726	0.0307962	21.7567	23.6702	27.3671	28.1799	24.1261	23.7186	17.2117	21.8742	20.2912	20.3302	18.9011	21.3275
	ENSMUSG00000110185.3	Igip	0.277577	5.38556	17.6816	0.000313382	0.0174668	46.9975	44.2067	45.1452	46.322	44.9245	45.528	36.6966	39.5235	35.3145	41.5075	34.4052	38.3895
	ENSMUSG00000022199.13	Slc22a17	0.277469	5.35534	15.7052	0.000578288	0.0258352	38.7904	39.7301	46.2651	53.6087	39.7409	42.9826	32.3449	37.1385	37.4607	36.1939	34.231	33.8443
	ENSMUSG00000111080.2	Gm20300	0.277431	4.76734	22.9574	7.05336e-05	0.00682553	32.9834	29.8815	28.347	27.1389	27.5179	29.4457	25.7201	27.2576	24.6486	24.4116	23.8659	23.7749
	ENSMUSG00000020620.15	Abca8b	0.2756	4.91533	15.8428	0.000553538	0.0252501	35.3062	34.6939	34.5763	30.113	34.8773	30.1978	29.6171	30.0515	29.2012	30.5723	24.3014	27.6908
	ENSMUSG00000027208.15	Fgf7	0.27479	4.60177	14.5313	0.000845835	0.0328002	30.1961	26.1883	21.9077	27.6594	26.174	24.4128	20.1344	24.4637	25.299	22.4864	19.5108	21.8869
	ENSMUSG00000060301.7	2610008E11Rik	0.274735	4.89008	12.8775	0.00147872	0.0457717	30.3509	29.8815	28.7669	33.3102	35.7092	35.6935	27.8634	26.0992	23.413	27.569	25.695	26.3622
	ENSMUSG00000022610.11	Mapk12	0.273445	5.36851	12.5137	0.00167858	0.0494017	46.2233	47.1725	48.9948	48.7013	43.2606	37.5447	38.6451	39.1147	40.3223	40.8914	34.6665	36.5715
	ENSMUSG00000046949.17	Nqo2	0.271768	5.19138	35.1625	4.04543e-06	0.00129858	38.7129	37.4917	42.3455	39.4072	38.397	37.0819	30.7862	35.6393	33.5586	31.0343	31.2695	33.1451
	ENSMUSG00000040410.15	Fbxl4	0.270924	4.45249	15.2618	0.000666604	0.0280019	27.5636	20.4806	23.3775	21.3394	23.4862	24.6442	19.2901	20.8521	19.901	20.8692	19.4237	19.2997
	ENSMUSG00000059810.19	Rgs3	0.27083	6.65271	20.2658	0.000147357	0.0103716	89.814	102.515	111.288	126.549	113.655	101.99	86.0583	85.4526	77.4579	81.7058	86.8404	95.0998
	ENSMUSG00000028717.13	Tal1	0.263618	4.73636	15.4302	0.000631435	0.0271596	31.2801	30.6089	29.0469	26.9159	28.1578	30.0242	25.0056	22.8283	26.4696	24.2576	25.2595	24.1945
	ENSMUSG00000068876.17	Cgn	0.26076	6.83108	27.8958	2.03819e-05	0.00319492	128.062	125.681	134.666	122.162	120.887	120.849	112.623	99.831	100.611	118.208	98.4249	102.722
	ENSMUSG00000026447.18	Pik3c2b	0.255097	4.58708	13.9569	0.0010237	0.0366547	23.8472	26.4121	25.8272	25.1314	27.3899	24.0078	21.1086	21.0565	21.4619	21.7163	18.9011	23.0058
	ENSMUSG00000034265.9	Zdhhc14	0.25496	4.14355	15.3132	0.000655656	0.0278992	19.0468	17.235	20.8578	18.8114	20.3504	17.1815	17.7313	17.8537	17.7548	14.2465	14.6331	16.2928
	ENSMUSG00000044712.16	Slc38a6	0.250024	4.23886	13.6795	0.00112385	0.0387293	19.4339	19.5293	23.4475	22.1573	17.5986	17.9914	17.8612	16.9679	17.0394	16.5568	16.1138	16.8522
	ENSMUSG00000025795.9	Rassf3	0.246291	7.78177	31.2265	9.44853e-06	0.00226079	217.954	239.891	247.424	256.221	237.358	232.326	184.717	191.212	188.865	193.907	197.982	214.814
	ENSMUSG00000000385.9	Tmprss2	0.246248	6.77669	17.2173	0.000360833	0.0193046	113.506	112.307	126.966	110.266	113.847	101.411	97.5544	83.5446	90.0098	99.2637	95.0279	100.834
	ENSMUSG00000038453.18	Srcin1	0.246136	4.45287	13.7402	0.00110106	0.0383247	19.0468	21.5997	24.4974	22.6777	23.2942	20.826	17.6663	20.1706	18.6003	19.021	17.4203	18.2508
	ENSMUSG00000029859.7	Epha1	0.242009	5.15628	12.4501	0.00171644	0.0499208	36.0805	44.5424	39.3358	45.9503	41.4688	37.1398	29.682	31.2781	33.0383	33.1136	39.6313	32.7255
	ENSMUSG00000036555.15	Iqce	0.240242	4.99385	21.4482	0.000105999	0.00866691	34.2222	30.8328	35.2062	33.0872	32.7015	31.0655	28.6428	31.0055	27.055	27.3379	27.9596	27.8307
	ENSMUSG00000021835.16	Bmp4	0.23977	6.22848	17.7771	0.000304486	0.0170808	86.717	80.6912	80.0015	93.9824	78.3939	74.2217	70.4055	71.892	76.6124	71.3867	69.2458	65.7307
	ENSMUSG00000026034.18	Clk1	0.239634	7.64067	29.7507	1.32014e-05	0.00257117	235.375	207.66	206.898	213.84	227.694	217.632	184.717	206.34	196.474	179.891	196.937	173.207
	ENSMUSG00000020629.13	Adi1	0.237567	5.40449	12.4777	0.00169985	0.0497723	44.2102	40.5694	50.8146	49.9653	40.1249	39.743	33.8388	36.6615	37.3957	39.0432	35.3633	39.7181
	ENSMUSG00000037754.14	Ppp1r16b	0.236327	7.02962	14.8075	0.000772534	0.0311421	145.948	162.669	124.377	152.201	144.949	134.386	108.011	117.957	119.211	124.83	126.123	126.567
	ENSMUSG00000003031.15	Cdkn1b	0.234039	6.2638	14.8948	0.000750853	0.0307962	86.3299	80.3554	73.7721	80.5989	80.9537	76.8828	72.6138	78.1612	72.19	73.2349	68.2877	59.9968
	ENSMUSG00000066894.15	Vsig10	0.233569	5.28787	20.4961	0.000138098	0.0101004	39.6421	40.7933	43.1154	43.9427	41.9807	44.371	36.4368	34.7535	36.4852	36.964	34.231	35.0331
	ENSMUSG00000035764.6	Fbxo45	0.233538	4.95018	15.0551	0.000712707	0.0294144	34.1448	30.3291	31.9166	33.5333	33.5974	35.3464	28.0583	29.0975	29.9166	24.2576	28.1338	29.7187
	ENSMUSG00000040760.12	Appl1	0.233107	5.4047	16.0903	0.000511867	0.0241763	46.6104	48.0118	43.0454	40.2251	46.5884	47.0322	36.6316	40.8864	38.7615	40.7374	38.1505	38.3895
	ENSMUSG00000040543.17	Pitpnm3	0.231915	5.94689	16.7322	0.000418881	0.0211688	54.0433	64.4634	65.863	71.0817	66.6828	63.3459	48.1277	53.0842	48.9721	57.9872	52.8707	54.7523
	ENSMUSG00000034429.16	Zfp707	0.23182	4.06912	12.7763	0.00153158	0.0467007	17.9628	17.7386	17.6381	20.1497	15.8708	16.7765	14.8735	15.2643	15.5436	15.0936	15.5912	14.1251
	ENSMUSG00000020160.19	Meis1	0.230787	6.12629	13.5956	0.00115623	0.0391448	74.0191	73.0809	75.172	76.5838	75.7701	75.8415	70.7302	65.0094	58.3373	67.3822	62.539	61.3953
	ENSMUSG00000037151.9	Lrrc20	0.229397	4.56545	14.7962	0.000775412	0.0311856	22.9955	24.7893	24.0074	26.6928	23.5502	27.3631	21.4334	20.5795	20.1612	18.713	20.8173	22.3065
	ENSMUSG00000028434.13	Epb41l4b	0.2281	6.20945	14.5334	0.000845249	0.0328002	82.4586	82.1461	79.7215	77.4017	70.3945	73.9325	56.2464	69.8476	65.4912	64.764	73.9493	66.7796
	ENSMUSG00000049800.14	Sertad2	0.224995	6.112	16.6158	0.000434276	0.0218195	80.6003	76.2705	74.1921	77.5504	79.3538	73.5854	66.4435	64.7368	67.3773	66.4581	66.8941	65.451
	ENSMUSG00000057069.8	Ero1b	0.223322	5.23829	16.4024	0.00046413	0.0226626	42.8165	40.6813	41.9955	37.0279	40.1249	35.6935	37.9306	34.8897	30.632	35.8859	34.0567	34.6135
	ENSMUSG00000047669.9	Msl3l2	0.214584	4.05161	12.6181	0.00161837	0.0483668	18.6596	16.8993	17.2182	19.1088	19.5185	16.7765	16.6271	16.3546	16.7793	14.5546	14.6331	15.9432
	ENSMUSG00000031024.14	Denn2b	0.212606	7.20337	15.9096	0.00054195	0.0248523	146.722	160.207	152.444	167.295	173.427	148.501	122.105	136.629	133.519	135.92	131.959	144.048
	ENSMUSG00000060181.7	Slc35e3	0.211421	5.22946	13.7717	0.00108942	0.0380728	35.7708	39.0586	42.1355	45.3554	36.9251	36.6191	30.0717	32.7091	32.9082	32.6515	33.2728	35.8722
	ENSMUSG00000033454.7	Zbtb1	0.197038	4.95117	15.1603	0.000688819	0.0285646	31.3575	33.183	31.7766	30.9309	29.9497	31.644	26.3696	28.1435	25.6892	27.1069	30.834	26.0126
	ENSMUSG00000022964.15	Tmem50b	0.190744	7.15084	29.9132	1.27181e-05	0.00253398	142.851	149.743	143.205	149.747	148.404	148.386	123.599	121.91	126.495	130.683	124.12	134.398
	ENSMUSG00000032420.9	Nt5e	0.189992	6.76072	13.9155	0.00103802	0.0367957	126.824	118.351	113.108	108.704	112.631	104.593	108.011	99.831	107.7	103.499	95.5505	101.463
	ENSMUSG00000042364.12	Snx18	0.189313	6.1967	17.2268	0.000359777	0.0193046	76.9613	72.3535	76.2219	75.0224	79.3538	76.5357	63.0012	68.2122	63.28	64.995	70.8136	67.4789
	ENSMUSG00000044408.8	Sptssa	0.189129	5.76439	13.0489	0.0013937	0.0440434	64.9603	57.9164	54.5942	57.8468	54.5238	58.8914	52.0247	49.8133	50.533	53.7518	47.7317	53.7034
	ENSMUSG00000071369.12	Map3k5	0.181545	5.59887	18.0757	0.000278404	0.01614	57.8371	50.8097	51.4445	50.5602	52.2199	48.0156	54.233	48.7911	50.598	44.8188	45.9897	42.725
	ENSMUSG00000054619.8	Mettl7a1	0.174492	9.86034	13.1746	0.00133472	0.0427654	938.402	991.908	1018.67	1056.19	958.581	906.859	823.432	876.605	871.352	836.849	850.983	901.001
	ENSMUSG00000042121.17	Ssh1	0.173299	6.10354	13.4383	0.00121969	0.0402707	69.993	77.1099	71.3924	82.9782	72.8263	65.602	65.5342	66.9856	65.6864	63.3008	63.3229	65.0315
	ENSMUSG00000040327.17	Cul9	0.172561	4.92985	14.1564	0.000957695	0.0352484	29.8864	32.0638	31.6366	32.1206	30.4616	32.5118	30.2666	29.9834	29.5914	29.1091	24.5627	26.8517
	ENSMUSG00000029672.17	Fam3c	0.164662	5.83202	13.6592	0.00113159	0.0388955	62.715	62.1691	59.7036	58.3673	56.8276	55.9411	52.869	54.1064	59.1828	55.677	53.0449	49.9274
	ENSMUSG00000050627.14	Gpd1l	0.12699	6.22998	12.9914	0.00142162	0.0445653	71.3867	74.8156	76.9218	76.6581	78.4579	78.2712	67.9374	68.2803	67.6374	69.5385	69.6813	69.5068
	ENSMUSG00000039367.12	Sec24c	-0.122892	7.37584	12.5907	0.00163393	0.0484976	152.064	164.908	159.373	155.696	161.395	158.972	170.298	167.089	164.606	173.192	177.165	173.207
	ENSMUSG00000040731.14	Eif4h	-0.129502	8.71164	12.5937	0.00163221	0.0484976	387.439	427.91	400.217	396.451	403.553	422.479	430.876	425.764	472.552	443.953	442.564	436.06
	ENSMUSG00000048874.16	Phf3	-0.129517	6.39825	13.7797	0.00108651	0.0380475	80.5229	80.0197	77.7617	77.1786	81.9776	82.8414	82.9408	82.6587	87.9937	86.7113	89.105	90.2049
	ENSMUSG00000002052.7	Supt6	-0.136503	6.79712	17.3945	0.000341853	0.018581	101.66	105.425	105.759	105.358	109.815	110.899	112.363	112.71	112.122	114.511	118.807	119.784
	ENSMUSG00000006673.15	Qrich1	-0.139459	6.35828	16.1242	0.000506443	0.024026	75.7999	81.8103	80.2814	74.8737	79.5458	78.0977	87.6821	86.8836	81.5551	84.9401	88.7566	86.7786
	ENSMUSG00000032042.12	Srpr	-0.142184	7.50509	14.2671	0.000923058	0.0347078	168.788	183.262	176.311	168.113	178.29	174.592	190.108	188.418	198.425	194.754	204.602	181.669
	ENSMUSG00000042520.17	Ubap2l	-0.142955	7.32903	13.398	0.00123654	0.0405233	143.238	153.828	152.444	155.175	157.428	147.286	153.931	157.549	172.085	173.269	168.89	164.816
	ENSMUSG00000027255.15	Arfgap2	-0.144341	6.35282	18.357	0.000256051	0.0154648	76.1871	81.2508	73.5622	76.9556	76.2181	79.139	85.9934	84.4305	84.8069	84.4011	85.8822	84.8905
	ENSMUSG00000034075.11	Zdhhc5	-0.14468	6.53436	17.044	0.000380501	0.02017	86.0976	93.4496	91.6202	86.1754	92.7928	96.7254	99.438	97.7867	97.1638	97.9545	102.257	102.232
	ENSMUSG00000059273.10	Zc3h4	-0.146091	6.61494	13.3412	0.00126074	0.0411556	80.6778	92.7781	94.3499	100.154	97.4004	98.4609	99.9576	96.2194	93.6518	102.806	101.909	105.938
	ENSMUSG00000049659.16	Aftph	-0.148655	6.32425	16.3381	0.000473551	0.0229289	96.3178	79.6839	79.3015	72.2713	78.7139	75.8415	96.1255	100.308	98.0092	92.4099	91.8923	83.5619
	ENSMUSG00000000131.16	Xpo6	-0.148935	6.10909	21.4797	0.000105085	0.00863293	66.7411	63.0085	66.2829	64.836	64.8909	63.8665	72.5488	75.708	74.3361	72.6188	70.9879	71.2549
	ENSMUSG00000025162.19	Csnk1d	-0.154423	7.52459	16.5559	0.000442445	0.0221657	163.369	180.52	174.631	181.868	177.65	178.583	185.756	195.028	196.994	188.362	204.166	190.759
	ENSMUSG00000022241.7	Tars	-0.154782	5.43031	12.6707	0.00158889	0.0477326	42.5068	41.8005	40.3157	38.5893	40.8288	40.9	45.9194	48.4504	48.712	46.436	45.9897	43.2844
	ENSMUSG00000033161.11	Atp1a1	-0.157241	9.14824	13.6367	0.00114025	0.038908	501.875	536.971	582.548	568.43	550.613	544.08	556.879	583.177	623.955	599.201	640.72	592.206
	ENSMUSG00000004936.9	Map2k1	-0.163471	6.35147	13.4535	0.00121338	0.0401388	89.1946	84.0487	85.9508	72.1226	82.3616	80.5274	94.9564	101.466	108.74	93.026	93.7214	86.2891
	ENSMUSG00000040414.9	Slc25a28	-0.16477	5.73071	14.3525	0.000897293	0.0342592	51.6431	52.0967	51.4445	51.6011	54.9077	52.5279	63.7806	63.7147	63.1499	57.0631	57.4	55.941
	ENSMUSG00000043683.5	Fem1a	-0.168438	5.94072	16.4376	0.000459055	0.0225868	55.2821	60.7702	57.8838	53.0138	54.8437	62.6517	65.1445	61.0571	63.9954	60.6055	65.5875	66.2901
	ENSMUSG00000021408.16	Ripk1	-0.16847	5.70436	13.2648	0.0012941	0.0416946	51.7205	50.9776	48.5048	46.322	52.1559	51.4866	58.7795	57.241	59.0527	55.985	58.271	54.2628
	ENSMUSG00000037331.16	Larp1	-0.169088	7.12244	21.0635	0.00011787	0.00920343	135.031	131.221	138.935	124.021	135.221	131.725	155.944	153.392	149.323	147.163	151.383	148.523
	ENSMUSG00000040842.18	Szrd1	-0.172901	7.11088	14.0344	0.00099748	0.0363033	121.094	139.055	133.756	141.717	121.463	137.452	139.902	149.781	144.51	144.16	144.85	153.418
	ENSMUSG00000031960.15	Aars	-0.173577	6.59582	13.0822	0.00137782	0.0439217	89.5818	94.0092	94.9799	92.5697	96.6325	89.2049	115.351	116.867	106.984	105.655	104.261	96.4983
	ENSMUSG00000048701.14	Ccdc6	-0.174096	5.89569	14.4778	0.000860873	0.0332347	61.089	61.05	61.0335	52.3446	55.4837	58.0815	66.7033	68.9618	68.4179	68.6914	66.4586	63.2134
	ENSMUSG00000028433.15	Ubap2	-0.174699	6.06645	17.8303	0.000299651	0.0169341	54.895	63.7919	60.2636	64.6873	65.6589	63.0566	62.8713	66.3723	66.4668	69.3075	73.3396	69.1571
	ENSMUSG00000031545.7	Gpat4	-0.175908	6.16347	14.3367	0.000901987	0.0343627	63.9538	66.7577	67.0529	69.7433	67.2588	70.1722	79.6933	70.9379	76.4823	72.0027	74.9945	77.3385
	ENSMUSG00000038611.18	Phrf1	-0.178884	6.21204	22.1992	8.63946e-05	0.00753761	66.6637	72.4094	66.8429	65.6539	72.0584	70.8086	75.1468	73.5274	73.0354	77.5473	83.4434	78.5272
	ENSMUSG00000002372.10	Ranbp3	-0.182152	6.14489	15.2113	0.00067756	0.0282328	64.5732	70.1152	60.0536	66.4718	66.9388	69.5937	70.4704	71.2787	74.8564	77.5473	78.4786	72.2339
	ENSMUSG00000031862.12	Atp13a1	-0.182567	6.12327	15.2456	0.000670101	0.0280019	62.173	67.709	62.0134	66.1743	67.8987	62.6517	73.7828	68.8255	75.962	76.2382	74.1235	70.3459
	ENSMUSG00000071054.13	Safb	-0.182571	6.83668	15.6924	0.000580646	0.0258738	99.4923	109.062	96.4497	101.864	103.224	119.576	115.026	120.819	120.902	119.902	119.503	113.071
	ENSMUSG00000012114.18	Med15	-0.183045	6.40021	12.6631	0.00159314	0.0477776	74.8708	85.6714	79.9315	73.0148	78.5859	79.7175	95.0214	93.7662	97.7491	92.1789	83.5305	85.45
	ENSMUSG00000042350.14	Arel1	-0.185762	5.92814	15.7301	0.000573717	0.0257988	60.7793	61.6655	61.5234	50.8576	64.763	60.1641	71.4447	73.5274	72.5151	67.9213	70.291	65.1713
	ENSMUSG00000028920.10	Fbxo42	-0.185874	5.19845	13.5092	0.00119063	0.0397658	36.3127	32.9032	33.5964	33.2359	35.4532	35.0572	39.2296	35.6393	33.6236	42.4316	40.6765	39.858
	ENSMUSG00000061374.15	Fiz1	-0.186342	5.15417	15.2442	0.000670405	0.0280019	31.2801	34.0224	29.6768	35.6895	34.9413	31.9333	36.3718	37.5474	37.5908	36.7329	38.1505	36.5715
	ENSMUSG00000022010.20	Tsc22d1	-0.188384	8.17841	15.6513	0.000588306	0.0260384	287.018	291.764	285.36	272.951	268.075	284.044	276.621	307.875	335.651	316.427	332.728	333.549
	ENSMUSG00000040043.18	Rbms2	-0.190246	5.65902	15.4612	0.00062519	0.027025	51.1011	49.9703	48.4348	53.5343	51.196	50.0982	55.1423	53.2886	53.4596	62.2997	53.9159	61.8848
	ENSMUSG00000052488.8	Cherp	-0.19074	6.37243	15.2581	0.000667408	0.0280019	70.7673	80.4674	74.1221	77.253	77.05	76.2465	85.2789	84.0216	87.1482	86.2493	84.7499	87.268
	ENSMUSG00000025332.15	Kdm5c	-0.190927	6.63716	19.0023	0.000211788	0.0135466	86.7944	98.9894	89.0305	84.1678	98.1044	101.932	105.154	102.489	105.358	102.883	105.48	109.015
	ENSMUSG00000020476.15	Dbnl	-0.191237	6.80545	20.7108	0.000130029	0.00971521	113.274	105.313	109.118	105.73	110.135	107.023	131.198	132.54	134.494	121.442	127.43	116.008
	ENSMUSG00000024807.19	Syvn1	-0.191284	6.45765	12.9974	0.00141866	0.0445653	83.3877	91.1553	87.2107	89.2982	76.794	81.3951	100.542	99.2177	104.253	95.6443	99.7314	89.6455
	ENSMUSG00000022521.11	Crebbp	-0.191644	5.97424	13.8654	0.00105561	0.0371909	58.7662	64.4075	53.1943	59.9287	57.4675	61.2633	62.8063	66.5767	65.6864	72.2338	66.1973	67.4789
	ENSMUSG00000027540.14	Ptpn1	-0.192714	6.94747	19.3773	0.000189948	0.0124847	109.867	125.122	120.107	119.56	117.559	119.113	138.668	142.148	134.559	136.074	132.743	130.972
	ENSMUSG00000037536.15	Fbxo34	-0.194904	4.71577	13.412	0.00123067	0.0404791	24.4666	26.0204	25.2673	21.5624	26.5579	25.0491	27.7985	27.7346	27.2501	29.0321	28.7435	29.439
	ENSMUSG00000020601.9	Trib2	-0.195751	6.72793	13.2594	0.00129649	0.0416946	99.4923	107.887	97.7796	105.433	99.8962	116.626	108.856	107.259	103.797	115.897	127.43	125.238
	ENSMUSG00000029111.8	Nelfa	-0.196624	4.97703	12.54	0.00166315	0.0491962	27.4088	31.1126	28.277	25.2801	29.4377	30.3713	33.3192	30.6648	33.3635	32.6515	33.0986	33.0052
	ENSMUSG00000021133.10	Susd6	-0.196643	7.66546	13.9862	0.00101369	0.0366071	199.759	205.813	198.009	181.719	197.617	212.079	227.454	233.53	218.976	233.874	218.625	236.91
	ENSMUSG00000049680.18	Urgcp	-0.197351	5.84589	15.9808	0.000529879	0.0246245	50.9462	58.8117	52.9144	53.9061	55.4197	53.3957	58.8444	63.851	59.9632	57.5252	66.4586	62.7239
	ENSMUSG00000030216.13	Wbp11	-0.197477	6.24222	17.738	0.00030809	0.0172272	63.9538	74.0322	70.8324	71.156	69.4346	67.8582	77.8747	77.8886	83.7664	76.3152	80.0464	79.2265
	ENSMUSG00000038346.19	Zfp384	-0.199314	6.30262	19.3147	0.000193417	0.0125569	69.451	76.1026	68.7327	77.7734	79.1618	74.8002	79.2386	83.9534	88.7741	86.0953	86.6662	81.8837
	ENSMUSG00000017999.17	Ddx27	-0.199465	4.97694	17.2279	0.000359658	0.0193046	30.1961	29.3219	27.1571	27.9568	29.5017	29.0986	33.3192	34.2083	33.6886	34.5767	31.705	33.4947
	ENSMUSG00000032312.8	Csk	-0.202602	6.68299	20.057	0.000156338	0.0107967	88.9623	98.4858	88.8205	96.4361	95.1606	102.163	101.257	107.327	105.228	107.427	108.529	111.812
	ENSMUSG00000039703.17	Nploc4	-0.203154	6.21988	26.2044	3.07285e-05	0.00406602	67.2831	72.8011	66.4929	69.1485	68.5387	71.2135	81.1871	77.139	81.8153	79.5496	79.7851	77.6881
	ENSMUSG00000005621.12	Zfp592	-0.203606	6.2473	15.7658	0.00056725	0.0256729	68.4445	72.5773	68.1027	72.3457	78.0099	69.7094	77.8747	76.662	78.7586	81.7058	83.7047	85.7297
	ENSMUSG00000042608.16	Stk40	-0.205752	6.65315	14.7465	0.000788103	0.0313325	93.2982	104.753	93.86	98.2949	102.584	97.2461	111.454	112.097	122.723	111.431	117.674	106.777
	ENSMUSG00000033088.20	Triobp	-0.206058	5.99435	14.2433	0.000930391	0.0348131	57.8371	65.6385	58.3738	60.003	60.4113	59.1228	69.6261	74.5496	76.7425	71.8487	68.9845	63.6329
	ENSMUSG00000028273.16	Pdlim5	-0.206494	6.57974	12.7353	0.00155358	0.0469856	85.633	99.3811	89.8004	89.5212	92.4088	95.5106	115.805	102.284	109.456	104.654	109.225	97.8968
	ENSMUSG00000020823.17	Sec14l1	-0.206702	7.94946	24.4031	4.83672e-05	0.00527294	208.663	251.922	220.756	230.421	235.566	240.136	249.861	243.751	263.591	274.226	261.218	268.657
	ENSMUSG00000024457.17	Trim26	-0.208196	6.47803	18.181	0.000269796	0.0157995	94.1499	87.0144	93.79	75.2454	97.0804	85.7339	108.596	111.211	110.496	102.729	110.009	95.3096
	ENSMUSG00000050565.17	Tor1aip2	-0.208492	7.31435	14.3027	0.000912219	0.0345796	216.328	162.893	201.998	152.127	176.114	147.691	243.691	229.1	239.202	209.617	220.716	176.284
	ENSMUSG00000025184.11	R3hcc1l	-0.209237	5.06564	17.3936	0.000341949	0.018581	30.1961	34.8617	29.3969	30.2618	29.5657	29.7928	34.4883	37.2748	35.6397	35.5008	37.3666	33.9842
	ENSMUSG00000033732.11	Sf3b3	-0.210912	6.61041	19.374	0.000190127	0.0124847	87.6461	93.9532	85.8808	82.6064	100.6	92.0395	104.244	105.691	97.7491	103.884	108.964	105.169
	ENSMUSG00000026048.17	Ercc5	-0.211987	5.2414	19.0574	0.000208416	0.0133803	34.6868	35.9249	31.6366	35.7639	35.0053	36.3299	38.5152	35.9119	39.8671	40.1213	45.2929	38.0399
	ENSMUSG00000024472.10	Dcp2	-0.212013	5.65244	14.2979	0.000913664	0.0345796	63.0247	53.2719	56.344	44.3889	55.8037	46.3958	73.9127	66.0316	66.922	64.918	64.281	56.6403
	ENSMUSG00000031995.10	St14	-0.212579	5.88972	16.8373	0.000405495	0.0207954	61.5536	55.6221	62.6433	50.1884	59.7074	56.9245	66.1837	75.9806	72.4501	69.1534	65.4133	66.2202
	ENSMUSG00000057367.13	Birc2	-0.212701	5.6908	19.3382	0.000192105	0.0125186	51.6431	50.9216	50.3946	43.1992	51.196	46.5694	60.728	58.8764	63.4101	58.7573	58.5323	52.5846
	ENSMUSG00000028917.15	Plekhm2	-0.214025	5.89927	14.0236	0.00100109	0.0363033	51.9528	55.3983	56.344	55.0957	57.8515	61.6104	62.6115	68.0759	68.0927	61.7606	64.3681	65.1713
	ENSMUSG00000039747.12	Orai2	-0.214124	5.35218	16.7627	0.000414947	0.0210929	35.2288	32.4555	37.0261	38.3662	37.4371	37.5447	41.0482	42.6582	38.9566	44.2798	41.983	41.0467
	ENSMUSG00000004040.17	Stat3	-0.215425	8.03428	28.4026	1.80724e-05	0.00295006	262.009	258.637	270.241	228.71	254.06	241.409	320.137	317.892	312.173	288.935	314.524	267.398
	ENSMUSG00000020262.16	Adarb1	-0.215821	6.40981	14.7362	0.00079078	0.031367	74.4837	82.2021	70.1325	81.7142	76.538	84.6347	75.9262	86.6111	97.3589	88.2515	86.579	96.4983
	ENSMUSG00000001034.18	Mapk7	-0.215861	5.4935	14.1203	0.000969273	0.035596	38.4807	45.5497	37.586	41.3404	42.8127	45.6437	44.5555	46.4061	48.777	46.282	49.4737	49.5778
	ENSMUSG00000037275.15	Gemin5	-0.216693	4.24	16.252	0.000486496	0.0232954	16.724	17.235	15.1884	16.9525	16.3827	16.9501	19.1602	19.0803	19.2507	20.2532	18.1171	19.4395
	ENSMUSG00000049878.14	Rlf	-0.218351	5.00065	17.2996	0.000351881	0.0190016	30.5058	30.6089	28.207	28.2542	29.7577	31.5283	33.1243	31.8233	33.3635	38.1961	35.5375	33.7744
	ENSMUSG00000034412.14	Tbc1d10a	-0.218917	5.43552	14.3784	0.000889644	0.0341175	36.7773	44.7663	37.656	39.6303	39.9329	42.1149	41.5678	44.9751	48.777	45.5119	48.6898	45.8717
	ENSMUSG00000038500.16	Prr3	-0.218969	4.46685	13.5792	0.00116268	0.0392099	19.5887	20.3127	21.0678	20.1497	19.6465	20.5368	23.9015	25.7584	25.1689	26.7219	23.3432	19.9989
	ENSMUSG00000007029.17	Vars	-0.219832	6.57307	18.3777	0.000254483	0.0154238	90.2012	89.5885	95.2598	85.5805	89.2731	81.048	111.713	116.594	114.398	108.12	104.174	91.5335
	ENSMUSG00000041734.16	Kirrel	-0.220298	5.53186	13.3124	0.00127319	0.04132	40.8034	45.2139	46.4051	41.8608	41.0848	50.0404	42.8668	46.1335	49.2973	48.8233	56.6161	53.0041
	ENSMUSG00000042772.16	Smg7	-0.221173	6.18703	13.7226	0.00110761	0.0384373	76.1096	73.5286	70.9024	58.0698	76.986	71.9656	93.5276	83.2039	82.9859	83.939	91.2825	76.849
	ENSMUSG00000020790.15	Ankfy1	-0.221369	6.69021	29.2249	1.4907e-05	0.00271519	124.269	108.334	108.488	95.1721	109.559	97.3618	134.446	136.152	140.543	129.22	131.349	115.658
	ENSMUSG00000000976.14	Heatr6	-0.221534	4.72562	14.7468	0.000788044	0.0313325	21.9115	25.8525	24.7774	24.6109	25.854	23.6029	27.6686	23.4415	28.0955	28.185	28.308	29.9285
	ENSMUSG00000045078.13	Rnf216	-0.222464	5.99693	25.2333	3.91562e-05	0.00465055	57.2952	66.0302	59.6336	56.7315	60.6673	62.8252	63.6507	65.4864	64.7758	72.1568	71.946	74.5414
	ENSMUSG00000020211.16	Sf3a2	-0.223533	5.62183	12.8355	0.00150039	0.0461132	40.0292	46.7248	44.7252	45.5785	46.5884	49.0569	53.1288	52.3346	53.9799	51.8266	51.4771	51.7455
	ENSMUSG00000052214.10	Opa3	-0.223628	5.60445	14.7466	0.000788085	0.0313325	41.9648	48.9071	44.0953	41.6378	45.1805	44.4867	50.7907	45.3158	51.4435	49.8244	56.3548	51.6755
	ENSMUSG00000045795.11	Whamm	-0.225687	5.08969	16.8147	0.000408336	0.0208793	36.2353	32.9032	35.0663	34.8716	30.7816	31.8754	40.1389	44.6343	46.3056	37.349	37.8021	38.5294
	ENSMUSG00000033885.16	Pxk	-0.226055	6.27913	22.4617	8.05033e-05	0.00726529	83.1554	78.4529	83.2911	72.197	75.8981	66.4119	97.0348	100.308	98.3344	92.564	95.5505	79.9258
	ENSMUSG00000030530.16	Furin	-0.226233	7.53335	13.7197	0.00110873	0.0384373	141.535	182.143	172.602	176.217	173.171	182.749	180.17	184.67	200.636	193.214	200.856	198.94
	ENSMUSG00000030168.14	Adipor2	-0.226912	7.63601	15.6777	0.000583378	0.0259289	167.008	182.87	196.959	180.232	192.497	190.5	237.326	192.575	209.871	200.992	218.015	219.289
	ENSMUSG00000038213.8	Tapbpl	-0.227537	5.90154	12.7703	0.00153474	0.0467007	64.5732	58.0283	60.4736	47.363	66.7468	50.2139	79.6933	79.1152	81.9453	63.5318	72.9041	61.0457
	ENSMUSG00000084347.4	Akt2-ps	-0.229235	3.68355	13.2446	0.00130306	0.0418282	10.8396	10.576	12.5287	12.417	12.0951	12.3221	13.4446	12.7429	11.9666	14.0925	13.1524	14.6845
	ENSMUSG00000018167.11	Stard3	-0.229674	6.12591	17.7869	0.000303593	0.0170808	67.9799	68.4924	73.2122	65.2821	69.3706	65.7756	77.2252	84.7712	93.7169	76.7773	79.8722	78.737
	ENSMUSG00000013701.14	Timm23	-0.231703	5.37443	18.4207	0.00025126	0.0153357	40.4163	38.3871	40.4557	36.2844	38.269	38.586	46.439	43.6122	45.9154	43.3557	48.1672	46.0814
	ENSMUSG00000024019.19	Cmtr1	-0.232049	6.6317	22.6836	7.58622e-05	0.00699465	115.287	103.746	109.258	95.6182	113.143	91.866	133.212	136.629	139.502	127.988	127.168	112.511
	ENSMUSG00000109336.2	Samd4b	-0.232752	6.70522	17.173	0.000365746	0.0195072	84.6265	104.921	97.9196	98.3693	97.2084	96.0891	101.516	113.255	116.154	109.044	116.716	111.812
	ENSMUSG00000020075.9	Ddx21	-0.232901	6.16939	16.9875	0.000387164	0.0202752	69.6059	67.8209	62.7133	54.2778	65.8509	70.0565	83.5253	78.9789	78.1082	75.8532	82.6595	71.0451
	ENSMUSG00000034595.18	Ppp1r18	-0.235204	6.67449	14.5684	0.000835565	0.0325476	90.0463	100.948	89.9404	84.3909	91.2569	93.3123	110.155	113.051	117.715	108.967	112.013	98.666
	ENSMUSG00000074259.11	Gramd2	-0.235637	7.64875	24.1479	5.16518e-05	0.00552675	181.331	195.74	180.441	187.816	174.322	180.724	204.527	209.884	228.406	222.939	220.541	206.632
	ENSMUSG00000029681.13	Bcl7b	-0.238106	5.60131	15.9386	0.000536992	0.0247559	41.5777	48.5714	40.7357	45.1324	47.7403	49.809	50.9855	56.6277	54.8253	51.8266	53.9159	52.235
	ENSMUSG00000037992.17	Rara	-0.239247	6.35114	13.5582	0.00117097	0.0392602	69.993	82.258	74.612	82.9038	72.3144	76.9407	78.1345	82.3861	94.5623	93.4881	91.718	87.1282
	ENSMUSG00000030199.17	Etv6	-0.241883	5.68498	20.2554	0.00014779	0.0103716	48.6235	48.6833	50.8846	45.6529	51.836	46.9743	55.3371	59.8986	63.1499	59.6044	59.8388	54.123
	ENSMUSG00000055204.16	Ankrd17	-0.241987	6.3156	20.424	0.000140925	0.0101361	85.7879	74.9835	72.7222	69.1485	81.0177	72.949	88.1367	91.313	87.5384	89.0216	99.6443	90.4147
	ENSMUSG00000020115.4	Tbk1	-0.242726	5.53905	30.0214	1.24071e-05	0.00253018	49.088	46.2212	41.9255	41.4147	43.3246	43.8504	52.2195	58.2631	54.3051	53.9828	52.7836	51.5357
	ENSMUSG00000028796.18	Phc2	-0.242756	7.23159	24.282	4.9896e-05	0.00540561	139.367	147.169	152.654	133.613	146.165	146.477	162.049	165.794	186.263	166.954	178.297	165.725
	ENSMUSG00000038467.16	Chmp4b	-0.243375	7.44282	32.0493	7.87292e-06	0.00197781	201.385	167.65	191.01	163.726	182.194	164.121	235.508	238.981	246.551	211.465	220.019	189.85
	ENSMUSG00000000555.9	Itga5	-0.243801	6.49356	18.0357	0.000281756	0.0162258	89.272	93.0019	83.7111	85.5805	84.2174	95.2792	98.7885	101.058	101.391	107.504	114.016	99.2254
	ENSMUSG00000025372.17	Baiap2	-0.245018	5.94157	12.8217	0.00150759	0.0462523	51.2559	59.651	57.4639	55.6162	54.9717	65.3706	62.1569	61.5341	78.5635	68.3834	64.5423	65.8706
	ENSMUSG00000041645.15	Ddx24	-0.246238	6.7378	20.4476	0.000139994	0.0101111	117.842	113.538	110.588	99.0385	107.768	101.527	138.603	132.881	146.266	124.214	141.366	116.777
	ENSMUSG00000033287.18	Kctd17	-0.248188	5.16879	15.0713	0.000708974	0.0293302	27.4088	34.47	35.6962	37.8458	30.4616	33.9002	36.0471	34.8216	35.5097	39.3512	39.4571	39.9279
	ENSMUSG00000035877.18	Zhx3	-0.249331	5.97262	13.7652	0.00109182	0.0380795	55.1272	63.8479	56.344	55.5418	58.8114	70.7507	62.027	63.3058	74.5963	65.534	72.1202	75.8001
	ENSMUSG00000047423.11	AI837181	-0.249635	5.70178	26.5396	2.82947e-05	0.00392368	48.1589	55.79	48.5048	48.7757	46.9723	49.6354	59.1042	60.7163	60.6786	56.9091	58.6194	59.3674
	ENSMUSG00000027613.16	Eif6	-0.249686	5.66876	14.6361	0.000817164	0.0319745	47.3846	46.1093	44.0953	46.9912	48.8282	52.4701	54.3629	57.1728	63.9304	56.9861	58.0968	51.7455
	ENSMUSG00000001542.8	Ell2	-0.25013	4.90019	12.8062	0.00151576	0.0464207	30.3509	29.0421	27.1571	23.6443	26.8779	30.1399	32.4099	32.5728	33.2334	34.8848	33.2728	33.8443
	ENSMUSG00000055024.13	Ep300	-0.253034	6.44588	26.4527	2.89048e-05	0.00397648	76.5742	85.6155	73.9121	75.9146	80.8257	85.7917	90.0203	85.9978	89.7497	94.2581	95.8989	99.9247
	ENSMUSG00000033323.15	Ctdp1	-0.254396	5.09609	21.2649	0.000111484	0.0089665	32.5189	33.0711	30.0268	27.0646	33.3414	32.801	33.7738	37.4792	40.6475	39.0432	38.4989	37.3407
	ENSMUSG00000028901.14	Gmeb1	-0.256142	4.51582	20.9396	0.000121996	0.00939857	21.989	20.2008	19.178	20.3728	21.2463	20.9996	24.7458	22.215	22.7626	24.7197	25.1724	26.2224
	ENSMUSG00000034708.13	Grn	-0.256781	8.33771	19.6147	0.000177392	0.0118723	336.88	308.607	348.493	312.432	320.551	291.622	387.49	401.028	483.543	367.869	395.529	350.82
	ENSMUSG00000063550.9	Nup98	-0.257418	6.17071	25.6151	3.55752e-05	0.00437348	68.5219	72.1296	63.9032	60.8953	69.8186	63.4616	81.9665	82.318	86.6279	80.4737	83.7918	73.7723
	ENSMUSG00000041936.19	Agrn	-0.26231	8.38687	14.8222	0.000768832	0.0311201	340.209	335.803	351.643	322.693	380.578	366.943	399.311	412.476	452.325	413.149	424.098	415.013
	ENSMUSG00000022807.10	Osbpl11	-0.263061	4.90584	18.3288	0.000258196	0.0154819	25.8602	29.21	25.1273	25.8749	26.9419	30.3713	31.6954	30.0515	29.5914	33.5756	31.705	34.2639
	ENSMUSG00000029826.15	Zc3hav1	-0.263519	6.84157	18.9802	0.000213159	0.0135776	140.296	119.134	123.537	100.079	137.461	105.634	170.038	155.3	162.59	150.397	158.612	128.385
	ENSMUSG00000020329.13	Polrmt	-0.263962	4.75383	23.9104	5.49271e-05	0.00570124	21.0598	24.2857	23.8675	22.6777	24.4461	26.9003	27.2139	26.7125	28.7459	28.4931	29.3533	27.6209
	ENSMUSG00000037851.14	Iars	-0.265057	5.56946	17.1596	0.000367249	0.0195273	44.907	46.6688	36.0462	38.8124	44.7965	40.8422	52.6742	51.108	51.2484	50.9025	55.1354	47.41
	ENSMUSG00000022009.2	Nufip1	-0.266697	3.42545	12.7625	0.00153894	0.0467007	9.60081	9.45687	9.379	9.66592	11.0711	11.3386	11.4961	11.1756	12.0967	11.2432	12.4555	12.5867
	ENSMUSG00000034168.8	Irf2bpl	-0.266977	7.0018	15.5987	0.000598277	0.0263212	101.892	132.732	116.958	139.635	113.911	112.345	127.626	145.215	152.965	139	145.982	135.587
	ENSMUSG00000034235.18	Usp54	-0.267826	6.0471	28.6868	1.69025e-05	0.00284454	60.1599	59.8749	63.7632	60.003	62.9711	65.4863	68.6518	75.3673	74.5963	73.7739	74.4719	76.7092
	ENSMUSG00000023905.16	Tnfrsf12a	-0.26832	5.06678	12.6235	0.00161528	0.0483581	35.2288	39.6181	32.9665	27.1389	33.9174	34.7679	49.2968	43.4759	48.9071	40.4293	39.0215	38.3196
	ENSMUSG00000009585.19	Apobec3	-0.269267	6.49008	13.041	0.00139748	0.0440434	98.4083	80.6352	94.8399	72.2713	91.6409	68.4367	128.211	127.702	129.292	107.504	107.396	80.5551
	ENSMUSG00000031826.21	Usp10	-0.269458	5.67527	18.8008	0.000224647	0.0141088	41.1131	49.2429	50.0447	40.4481	41.3408	48.8255	48.7772	54.6515	56.3212	54.2908	56.1806	53.3538
	ENSMUSG00000027639.17	Samhd1	-0.270037	8.52651	17.6096	0.000320269	0.0176581	469.433	349.848	369.911	308.938	427.167	309.093	590.523	515.033	520.808	470.213	488.64	370.959
	ENSMUSG00000006418.18	Rnf114	-0.270157	7.24949	22.5357	7.89229e-05	0.00723836	176.686	147.001	175.821	146.476	157.812	139.708	217.971	221.945	214.814	184.743	203.557	168.103
	ENSMUSG00000056602.14	Fry	-0.270513	5.7045	15.9118	0.000541565	0.0248523	46.9201	53.6076	44.1653	48.5526	49.6601	54.437	52.2195	55.1285	59.8981	60.1435	62.7132	59.0877
	ENSMUSG00000031627.10	Irf2	-0.272681	6.44084	28.4942	1.76859e-05	0.00292805	81.5295	81.6425	81.4713	79.2605	86.2013	74.8002	104.699	105.623	114.138	91.5628	99.0346	92.023
	ENSMUSG00000017132.18	Cyth1	-0.273207	5.912	23.9954	5.37307e-05	0.00561065	57.0629	54.7268	51.9345	55.8393	53.9478	54.9576	66.3786	66.3723	64.3206	68.4604	70.2039	62.3043
	ENSMUSG00000032508.9	Myd88	-0.274301	6.22949	25.8435	3.36048e-05	0.00428313	90.2012	69.4437	84.9009	66.9922	76.0261	60.1063	116.715	107.94	107.83	93.103	95.115	75.2407
	ENSMUSG00000029674.14	Limk1	-0.274594	4.98951	13.3132	0.00127284	0.04132	25.0086	34.3581	27.4371	31.377	27.5179	28.7515	30.2016	32.9136	39.3468	34.0377	34.7536	34.8233
	ENSMUSG00000037552.18	Plekhg2	-0.276022	6.5813	12.4973	0.00168821	0.0495991	76.9613	97.4226	81.0514	88.3316	90.105	100.196	86.2532	100.376	102.172	109.044	107.571	111.532
	ENSMUSG00000022035.7	Ccdc25	-0.279523	5.01754	24.2228	5.06627e-05	0.00545458	35.3062	30.8887	29.5369	24.9827	28.5418	30.4292	40.6585	37.4792	40.4524	35.4238	37.6279	35.5226
	ENSMUSG00000046223.11	Plaur	-0.280175	5.53245	13.5648	0.00116838	0.0392602	45.2167	51.0335	45.0052	41.4891	43.1326	47.09	50.0113	54.3108	63.9954	58.2953	61.3196	47.6198
	ENSMUSG00000042784.10	Muc1	-0.2815	8.56846	15.5601	0.000605705	0.0263303	341.293	335.02	423.245	303.51	368.931	369.373	389.893	415.474	473.592	414.151	450.054	446.899
	ENSMUSG00000020190.14	Mknk2	-0.281661	7.9372	24.9134	4.24579e-05	0.00481023	176.299	234.519	235.525	251.239	218.671	236.954	232.26	238.913	246.226	268.759	276.025	278.377
	ENSMUSG00000030609.19	Aen	-0.284018	5.22064	18.0414	0.000281279	0.0162258	38.7129	35.5332	37.656	29.6669	34.8773	32.2804	48.8422	40.0687	44.5497	44.3568	43.5508	40.837
	ENSMUSG00000037235.14	Mxd4	-0.284733	8.21679	12.5555	0.00165418	0.0490147	226.858	298.087	261.072	283.509	268.843	316.787	249.342	298.812	359.259	320.277	317.834	359.002
	ENSMUSG00000020454.18	Eif4enif1	-0.284741	6.09251	27.8786	2.04656e-05	0.00319492	60.0825	68.94	58.3038	58.2186	61.5632	66.7012	70.3405	74.277	71.1494	75.4681	80.6561	75.94
	ENSMUSG00000039682.13	Lap3	-0.289421	5.59417	14.114	0.000971323	0.035596	59.1534	44.3186	56.064	41.8608	48.9562	39.4538	71.6395	66.0316	68.4179	56.4471	64.3681	53.8433
	ENSMUSG00000022216.18	Psme1	-0.290655	7.24225	18.3123	0.000259463	0.0154819	188.687	142.692	170.782	133.91	161.971	129.642	217.581	218.47	228.406	189.286	206.605	165.026
	ENSMUSG00000024349.11	Sting1	-0.291424	5.13018	14.5057	0.000852989	0.0330038	35.6159	28.9302	34.2963	28.626	31.7415	27.3053	49.7515	47.6327	46.5007	40.8144	38.586	29.9984
	ENSMUSG00000024778.14	Fas	-0.294031	5.49186	20.2946	0.000146163	0.0103656	44.5973	42.0803	46.545	43.3479	39.101	39.6852	49.1669	57.1728	57.0366	52.6737	50.0835	52.8643
	ENSMUSG00000023988.9	Bysl	-0.29465	4.61737	15.5808	0.000601707	0.0263303	21.9115	23.894	18.548	21.3394	22.7182	23.8921	27.7985	25.6903	24.4535	26.2598	29.7017	26.2224
	ENSMUSG00000040723.15	Rcsd1	-0.295819	6.92155	20.4655	0.00013929	0.0101111	109.325	115.833	102.049	107.812	107.256	121.485	120.352	140.309	128.186	136.382	134.833	141.531
	ENSMUSG00000022146.13	Osmr	-0.300322	6.52966	41.7677	1.10281e-06	0.000659178	104.835	92.3864	101.349	75.9146	92.4088	82.7835	129.25	123.886	127.406	114.742	117.587	104.4
	ENSMUSG00000115338.3	Pnp	-0.301188	6.77427	13.9352	0.00103116	0.0366547	155.161	110.293	139.845	102.533	103.928	84.519	181.989	176.425	188.539	147.548	155.476	114.609
	ENSMUSG00000035517.18	Tdrd7	-0.301428	6.19211	25.0502	4.10104e-05	0.00473916	92.8336	76.8301	89.3105	65.1334	84.7294	67.916	108.531	110.189	122.008	93.7961	103.39	91.3937
	ENSMUSG00000106734.5	Gm20559	-0.301528	6.3242	17.0229	0.00038297	0.0202291	126.514	87.0704	97.7796	72.1226	90.8729	66.5276	151.852	137.719	142.949	117.284	120.462	87.7575
	ENSMUSG00000024308.16	Tapbp	-0.302748	8.7283	26.8649	2.61317e-05	0.00368487	483.68	400.043	474.549	392.287	454.237	362.026	650.666	615.272	653.807	524.657	540.64	456.549
	ENSMUSG00000024732.8	Ccdc86	-0.303738	4.10993	18.5639	0.000240848	0.0149636	18.0402	15.7242	13.9985	15.2424	18.1106	15.446	22.4076	21.6017	23.2178	18.405	21.2528	18.1808
	ENSMUSG00000022091.7	Sorbs3	-0.30555	8.01037	18.433	0.000250349	0.0153341	223.296	274.305	218.447	236.22	241.901	232.847	257.72	286.886	338.838	286.009	308.34	280.055
	ENSMUSG00000020464.16	Pnpt1	-0.305876	4.46986	13.0433	0.00139641	0.0440434	29.7315	20.2567	24.2874	16.7295	24.1901	18.6856	37.3461	33.6632	34.404	28.5701	31.0082	21.5373
	ENSMUSG00000031442.22	Mcf2l	-0.307738	6.0377	14.2795	0.000919263	0.0346402	55.1272	60.4904	64.6731	65.3565	58.4914	72.0234	62.3517	75.0266	91.4406	73.6199	63.2358	86.2891
	ENSMUSG00000039997.17	Ifi203	-0.312748	6.89917	12.486	0.00169494	0.0497125	215.399	120.141	143.275	99.8563	131.766	94.9899	242.847	227.601	216.635	175.425	185.962	123.28
	ENSMUSG00000038145.18	Snrk	-0.31401	7.65683	38.4038	2.1001e-06	0.000910076	172.505	194.286	168.402	204.323	201.136	210.343	207.644	219.424	222.488	244.809	223.938	251.805
	ENSMUSG00000038342.16	Mlxip	-0.314577	6.46446	32.6929	6.83916e-06	0.00174338	80.9875	81.6425	78.6716	84.9113	80.1858	89.4363	97.6843	100.376	103.602	102.575	107.048	98.0367
	ENSMUSG00000026466.17	Tor1aip1	-0.314889	7.58645	34.3351	4.81108e-06	0.00142943	235.53	201.952	204.308	157.183	212.079	178.063	279.673	271.486	284.402	250.431	266.792	222.785
	ENSMUSG00000090272.10	Mndal	-0.31502	6.47431	16.4312	0.000459972	0.0225868	152.994	89.1968	100.019	71.6021	92.1528	75.4366	172.376	162.387	154.721	131.761	135.443	86.6387
	ENSMUSG00000033855.16	Ston1	-0.315848	5.54726	15.4723	0.000622965	0.0269962	34.2997	42.3041	39.3358	46.9912	48.1243	47.9578	43.9709	45.1795	42.5986	54.5989	50.9545	59.8569
	ENSMUSG00000001750.17	Tcirg1	-0.316573	6.89722	20.6385	0.000132689	0.0098292	129.534	111.916	149.224	114.355	123.766	110.089	167.44	173.835	173.516	154.325	165.406	133.839
	ENSMUSG00000034842.17	Art3	-0.317182	4.85221	15.3083	0.000656678	0.0278992	24.9311	24.5655	26.4572	26.6928	28.2218	35.2307	36.177	33.7994	32.583	30.8803	34.4923	34.0541
	ENSMUSG00000060519.12	Tor3a	-0.320753	7.08921	22.9383	7.08912e-05	0.00682553	209.282	138.16	180.231	122.608	158.068	112.75	233.169	225.352	246.031	196.602	206.518	166.285
	ENSMUSG00000031770.17	Herpud1	-0.321832	7.46275	15.3646	0.000644904	0.0276702	152.529	174.7	166.582	173.169	157.812	153.534	165.362	201.366	239.072	203.764	209.044	195.724
	ENSMUSG00000021457.15	Syk	-0.323038	6.16659	16.288	0.000481038	0.0230978	67.8251	67.8768	59.0037	50.4858	69.0506	62.0732	89.111	85.7933	69.9787	83.631	81.0045	75.94
	ENSMUSG00000048911.16	Rnf24	-0.324715	3.59769	14.0098	0.00100573	0.0363954	10.6073	11.919	12.1087	11.3017	9.91923	12.3799	13.5095	12.3341	10.861	16.0177	14.0234	14.8943
	ENSMUSG00000027339.16	Rassf2	-0.324831	5.95269	19.7796	0.000169201	0.0116159	54.9724	55.9019	51.7245	46.4707	50.876	50.966	70.4704	66.7811	61.7192	70.3856	65.3262	62.584
	ENSMUSG00000002325.16	Irf9	-0.326987	7.01154	26.3391	2.97239e-05	0.00402526	184.196	144.987	159.583	137.925	151.476	136.063	218.88	216.902	214.424	190.364	210.176	169.431
	ENSMUSG00000023087.16	Noct	-0.327191	4.2139	13.062	0.00138741	0.0440434	19.6662	18.0744	16.0983	13.8297	17.7906	13.2477	30.3315	26.985	23.478	19.7141	21.6012	17.4117
	ENSMUSG00000054404.14	Slfn5	-0.327776	7.59144	22.2715	8.47283e-05	0.00745523	265.184	212.752	209.838	170.194	220.719	186.682	331.828	296.495	295.133	290.09	284.648	222.436
	ENSMUSG00000022557.12	Bop1	-0.329844	5.17336	22.6932	7.56681e-05	0.00699465	29.267	34.9736	32.0566	32.418	31.2296	34.4787	37.476	36.5252	42.3384	40.8914	42.854	38.5993
	ENSMUSG00000025743.15	Sdc3	-0.330162	8.21244	27.5598	2.20886e-05	0.00330072	288.799	306.817	298.588	318.678	310.696	274.499	376.643	385.286	428.002	369.64	390.912	344.177
	ENSMUSG00000045092.9	S1pr1	-0.330184	8.78638	21.4891	0.000104813	0.00863293	427.468	460.981	347.233	408.868	418.911	397.662	516.48	510.944	493.493	533.59	562.415	483.75
	ENSMUSG00000031897.10	Psmb10	-0.330951	6.22624	18.2063	0.000267772	0.0157341	93.6853	68.5483	74.822	59.9287	88.8251	55.6518	114.636	105.078	109.781	91.5628	98.5991	84.7507
	ENSMUSG00000020572.9	Nampt	-0.333427	6.58124	22.4719	8.02831e-05	0.00726529	131.159	96.6951	118.497	93.5363	106.36	79.6018	161.53	144.67	166.297	129.451	146.418	111.183
	ENSMUSG00000015202.14	Cnksr3	-0.334868	4.48292	17.6032	0.000320889	0.0176581	18.6596	21.9355	18.828	18.1422	18.6226	22.2723	24.3561	24.8044	26.1445	23.7186	24.9982	24.7539
	ENSMUSG00000032846.13	Zswim6	-0.335645	4.70018	13.9377	0.00103029	0.0366547	24.3892	23.3344	19.178	22.306	23.2302	26.1483	27.6686	30.3922	26.0794	27.569	25.8692	34.4037
	ENSMUSG00000056313.6	Tcim	-0.336012	5.84479	12.5178	0.00167615	0.0494017	43.4359	60.0987	52.4944	62.531	47.4843	53.9163	54.4928	69.098	60.5485	60.5285	65.2391	73.4926
	ENSMUSG00000049907.9	Rasl11b	-0.336319	5.01423	24.8703	4.29251e-05	0.00483159	28.4153	29.8255	29.3969	30.1874	28.0938	29.6193	28.9676	31.2781	36.5502	36.3479	37.9763	40.9768
	ENSMUSG00000047098.19	Rnf31	-0.336531	5.89486	30.1579	1.20264e-05	0.00253018	66.6637	61.8334	71.6024	54.7983	64.635	56.2303	88.2017	84.2942	86.693	78.9335	85.708	71.7444
	ENSMUSG00000020439.18	Smtn	-0.336612	6.43791	16.9945	0.000386322	0.0202752	57.6823	83.2093	71.6724	97.1053	80.2498	105.461	79.4335	76.662	79.1488	104.731	104.086	105.729
	ENSMUSG00000075600.4	Zc3h3	-0.33663	4.72396	20.6641	0.00013174	0.00980074	22.5309	26.1883	21.4177	22.8264	23.2302	23.545	23.7066	30.0515	31.4124	29.1091	29.6146	30.5578
	ENSMUSG00000022469.18	Rapgef3	-0.337825	6.3503	12.9054	0.00146449	0.0454122	70.2253	90.6517	64.9531	89.2982	65.9149	81.7422	79.5634	93.9025	97.2288	110.969	95.4634	88.8064
	ENSMUSG00000056144.15	Trim34a	-0.338053	6.30353	19.7436	0.000170955	0.0116209	133.792	79.8518	97.3596	77.253	89.977	75.8415	142.5	133.63	136.511	123.906	132.656	97.4074
	ENSMUSG00000037997.13	Parp11	-0.338949	4.98099	16.9509	0.00039154	0.0204427	42.7391	31.2804	35.0663	26.7672	38.973	27.3053	57.6753	44.2255	48.2567	46.051	46.5123	35.6624
	ENSMUSG00000048677.10	Tpcn2	-0.340892	4.61329	20.8344	0.00012562	0.00963491	21.9115	21.3759	20.2978	19.778	19.4545	24.0657	30.3965	28.2798	26.9899	26.4138	29.7017	22.796
	ENSMUSG00000028633.8	Ctps	-0.342119	5.41691	22.376	8.23779e-05	0.00732277	47.3846	37.8275	43.6054	29.7413	41.3408	33.3795	65.5992	58.8083	63.3451	46.821	53.9159	40.9768
	ENSMUSG00000018334.19	Ksr1	-0.342507	5.21219	21.1019	0.000116622	0.00914717	29.3444	38.0513	29.8868	33.8307	30.5896	33.4374	34.4883	35.7756	38.4363	41.1994	43.9863	42.4453
	ENSMUSG00000004947.16	Dtx2	-0.34313	4.53124	23.7305	5.75599e-05	0.00586908	17.5757	21.5438	22.6076	21.1907	19.0705	21.8095	25.7201	22.4875	24.7787	24.0266	26.9144	26.9216
	ENSMUSG00000026620.12	Mark1	-0.344884	3.17504	14.2887	0.000916459	0.0346098	7.20061	9.40092	8.60908	8.99674	10.1112	9.02462	10.5868	11.3119	11.7065	11.1662	12.1071	10.0694
	ENSMUSG00000020085.16	Aifm2	-0.345094	4.72212	12.9687	0.00143278	0.0446865	20.9824	21.6557	25.1973	27.1389	22.9102	25.0491	38.8399	26.5762	25.1689	27.646	30.0501	29.0893
	ENSMUSG00000042719.18	Naa25	-0.3452	4.61382	23.8292	5.60991e-05	0.00578822	26.3248	21.264	24.7774	21.1907	22.7822	20.3632	32.9944	30.8011	28.5508	30.0332	30.9211	27.1314
	ENSMUSG00000086688.5	Gm11560	-0.345798	3.20466	14.2323	0.000933801	0.0348131	6.73605	8.05793	9.30901	9.3685	7.55141	8.67752	9.87235	9.26759	8.71482	9.54903	10.3651	11.5378
	ENSMUSG00000034271.17	Jdp2	-0.345863	5.14144	19.7726	0.000169541	0.0116159	29.5767	36.2607	31.9866	30.4848	28.4138	33.3795	32.4099	37.9562	44.1594	40.6604	43.5508	38.4595
	ENSMUSG00000035021.14	Baz1a	-0.346087	5.00882	24.0208	5.33777e-05	0.00560757	29.8864	28.3706	27.0871	20.5958	30.9096	28.6937	38.1904	35.2986	33.8187	35.8089	37.8892	34.2639
	ENSMUSG00000024052.18	Lpin2	-0.347397	7.4984	52.6814	1.68643e-07	0.000208804	167.24	173.134	187.3	162.09	167.091	166.377	208.683	220.378	228.992	208.692	215.402	224.254
	ENSMUSG00000047040.10	Prr15l	-0.349164	6.28012	21.672	9.96948e-05	0.00834835	78.897	78.0052	75.6619	60.4491	66.8108	68.4945	91.9688	93.9706	112.187	92.0249	91.6309	87.0583
	ENSMUSG00000022528.9	Hes1	-0.350897	5.95822	25.9069	3.30794e-05	0.00424739	55.5918	65.4707	58.3738	52.1216	53.3079	55.7097	66.4435	84.9075	78.6285	70.6166	71.075	72.7234
	ENSMUSG00000022793.18	B4galt4	-0.351023	5.79856	29.2596	1.47872e-05	0.00271519	45.6813	55.4542	49.3447	58.0698	48.3802	49.5776	57.4155	69.4388	66.0766	57.9102	65.8489	66.9195
	ENSMUSG00000030545.10	Pex11a	-0.352568	4.6011	19.5694	0.000179716	0.0119815	22.6858	20.3127	21.3477	22.9751	20.8624	22.6772	28.448	25.2814	29.8515	27.723	27.3499	27.6209
	ENSMUSG00000042726.15	Trafd1	-0.355255	7.34632	23.3431	6.37023e-05	0.00627395	222.599	151.478	207.388	155.919	183.282	140.865	271.879	264.194	277.444	237.186	249.024	186.354
	ENSMUSG00000040451.19	Sgms1	-0.356896	6.67733	46.5267	4.68789e-07	0.000380631	92.7562	99.549	95.2598	87.9598	98.9363	89.8991	111.519	129.337	127.861	117.284	123.423	120.973
	ENSMUSG00000035161.8	Ints6	-0.358328	4.66789	23.3679	6.32889e-05	0.00626886	25.4731	24.5655	18.548	18.9601	23.6782	22.0987	30.8511	27.2576	27.7053	27.954	32.6631	27.481
	ENSMUSG00000053835.18	H2-T24	-0.35871	5.53517	12.6063	0.00162505	0.0483996	67.8251	49.1869	56.9039	50.4858	60.0913	51.0817	92.5533	77.9568	77.5229	64.687	85.2725	60.8359
	ENSMUSG00000022372.15	Sla	-0.359689	5.56337	12.7585	0.00154106	0.0467007	42.0423	37.5477	41.9255	31.4514	40.5088	39.3381	50.401	43.544	54.7603	53.2897	52.1739	48.2492
	ENSMUSG00000026946.10	Nmi	-0.359783	4.84908	18.7641	0.000227074	0.0142098	42.6617	27.4193	33.1765	21.265	31.9975	24.2971	48.1277	45.7246	45.5902	39.8133	41.8959	34.8233
	ENSMUSG00000032578.8	Cish	-0.359875	6.23791	36.1795	3.28036e-06	0.00115904	69.993	74.7037	65.233	73.2379	69.3706	63.4616	89.6955	93.9025	90.5951	87.7124	95.115	83.2822
	ENSMUSG00000054676.18	1600014C10Rik	-0.359977	5.15569	37.1038	2.7199e-06	0.00101542	39.2549	31.1126	35.6962	31.8232	34.1733	31.9333	54.6227	51.1762	54.24	44.5878	44.0734	36.3617
	ENSMUSG00000031217.9	Efnb1	-0.363156	7.4753	29.0552	1.55073e-05	0.00271519	125.198	183.598	157.063	181.794	164.531	180.319	176.403	186.851	218.001	195.139	203.034	220.338
	ENSMUSG00000038866.16	Zcchc2	-0.365212	5.5149	32.8495	6.61067e-06	0.00171896	54.1207	45.2699	51.0246	34.8716	47.6123	46.5694	64.4301	65.282	68.2228	62.3767	65.4133	53.9831
	ENSMUSG00000022094.16	Slc39a14	-0.365715	5.06583	26.3517	2.96317e-05	0.00402526	28.9573	30.0494	32.2666	28.849	32.3815	29.9664	47.738	42.59	42.4685	40.3523	36.3214	35.8023
	ENSMUSG00000035095.12	Fam167a	-0.366017	4.89263	15.3212	0.00065396	0.0278992	27.0216	24.9012	26.8071	23.6443	21.7583	21.9252	27.7985	27.8028	31.2823	31.9584	33.1857	34.0541
	ENSMUSG00000034575.14	ENSMUSG00000034575.14	-0.366478	5.29738	22.0875	8.90431e-05	0.00763391	44.5199	39.786	43.7453	32.1949	40.9568	42.8669	59.429	54.3789	63.4101	51.4415	56.7032	45.8717
	ENSMUSG00000010358.14	Ifi35	-0.368906	6.43204	29.8587	1.28781e-05	0.00253669	126.204	89.8123	100.789	89.1495	95.7365	75.3787	160.361	143.511	159.924	125.215	137.185	99.5751
	ENSMUSG00000049401.11	Ogfr	-0.370226	6.33851	41.8403	1.08801e-06	0.000659178	107.003	81.2508	93.3001	73.3866	89.2091	77.2299	125.093	125.93	133.714	115.358	122.465	98.9457
	ENSMUSG00000032596.15	Uba7	-0.371862	7.15506	29.0894	1.53842e-05	0.00271519	190.158	138.328	166.302	134.728	172.979	116.047	252.979	236.323	238.292	216.008	211.047	160.131
	ENSMUSG00000054200.8	Ffar4	-0.375533	3.83983	22.0035	9.10933e-05	0.00774025	16.4917	13.1501	16.6582	12.5657	13.5669	12.1485	20.4592	20.5114	22.5675	18.79	19.7721	15.6635
	ENSMUSG00000038507.7	Parp12	-0.376904	7.03345	30.5809	1.09244e-05	0.00249164	211.45	138.608	164.482	118.742	154.74	112.576	242.392	239.254	260.989	200.992	215.664	157.404
	ENSMUSG00000039899.6	Fgl2	-0.37841	5.75562	18.3066	0.000259908	0.0154819	64.0312	43.3114	56.484	39.5559	54.2038	43.3297	88.4615	72.4371	79.8642	64.0709	69.8555	55.941
	ENSMUSG00000050919.11	Zfp366	-0.378571	5.87804	15.7867	0.00056349	0.0255695	56.2112	60.3785	45.6351	51.9729	53.6278	50.3296	62.5465	53.3568	67.8325	73.7739	68.1135	76.849
	ENSMUSG00000035638.15	Muc20	-0.379818	4.38575	13.5796	0.00116253	0.0392099	19.0468	17.9625	18.968	16.1346	20.0944	19.4376	21.6932	22.6238	23.8032	25.4897	23.6045	26.2224
	ENSMUSG00000026088.16	Mitd1	-0.380992	4.32447	16.6977	0.000423387	0.0213343	31.3575	19.3055	23.9374	15.2424	21.2463	18.917	33.7738	32.9817	34.9243	30.1102	33.6212	22.2366
	ENSMUSG00000017679.17	Ttpal	-0.382687	5.43567	22.1304	8.80152e-05	0.00762828	40.0292	42.416	33.5264	31.8232	38.397	42.3463	53.2587	47.7008	45.5252	49.5163	50.8674	51.1861
	ENSMUSG00000002227.16	Mov10	-0.385382	5.37785	27.6264	2.17382e-05	0.00327661	52.1076	39.0586	46.895	36.1357	46.2044	33.7266	64.1703	62.6925	66.5969	56.139	61.5809	47.7597
	ENSMUSG00000025959.14	Klf7	-0.385871	6.77157	21.8519	9.49218e-05	0.00798726	99.802	110.517	91.2003	103.351	90.041	107.081	123.275	123.273	126.365	139.385	143.108	118.735
	ENSMUSG00000034422.15	Parp14	-0.388906	7.65079	14.8618	0.000758974	0.0309554	339.822	202.623	276.541	174.433	254.828	166.146	412.301	368.318	378.9	334.678	357.03	236.141
	ENSMUSG00000052040.11	Klf13	-0.390143	7.74362	58.4823	6.92936e-08	0.000120113	174.053	203.854	183.1	186.478	195.249	195.013	216.153	214.245	260.274	252.125	244.843	258.657
	ENSMUSG00000055452.7	Gm7353	-0.391237	3.5883	13.6367	0.00114026	0.038908	7.89744	12.0869	8.53909	11.5247	11.2631	10.5287	12.9899	10.426	15.1534	13.0914	12.2813	13.5657
	ENSMUSG00000063268.13	Parp10	-0.392383	6.308	25.526	3.63779e-05	0.00440961	103.983	79.7399	96.1697	72.197	93.4327	67.8003	142.565	128.724	135.21	117.053	126.82	89.226
	ENSMUSG00000026222.17	Sp100	-0.392605	7.63587	25.1551	3.99358e-05	0.00467735	312.955	204.19	245.114	168.707	237.677	162.906	378.592	347.33	358.218	304.799	328.112	236.84
	ENSMUSG00000038264.9	Sema7a	-0.393154	6.80332	29.0652	1.5471e-05	0.00271519	85.633	109.23	110.238	118.891	97.7204	97.7667	123.275	131.45	152.574	130.529	132.917	128.175
	ENSMUSG00000038305.16	Spats2l	-0.395231	5.02271	21.1765	0.000114239	0.00908358	40.8034	31.3364	37.236	29.7413	38.717	28.8672	43.841	48.7911	53.3295	47.6681	48.0801	43.1445
	ENSMUSG00000066258.14	Trim12a	-0.399924	5.51593	22.8278	7.30026e-05	0.00684014	70.6124	45.0461	54.0342	37.6971	49.7241	40.7265	75.4715	72.2327	79.0187	64.1479	77.5205	57.6193
	ENSMUSG00000029570.6	Lfng	-0.399994	5.93163	22.1932	8.65343e-05	0.00753761	45.5264	53.2159	42.7654	50.7832	50.3641	57.0402	60.1434	69.7795	66.922	69.2304	63.3229	61.9547
	ENSMUSG00000049307.7	Fut4	-0.402987	3.49053	18.5408	0.000242495	0.0150122	9.13625	8.72942	11.5488	8.84803	8.12737	10.0081	12.7301	13.8332	15.2835	11.6283	12.1071	11.6078
	ENSMUSG00000028028.12	Alpk1	-0.412097	3.07259	13.8384	0.00106523	0.037378	8.59427	8.56155	7.13924	6.39437	8.12737	7.11557	11.9507	11.4482	10.1456	12.9374	9.49408	8.95057
	ENSMUSG00000020089.9	Ppa1	-0.415402	4.49274	14.7721	0.000781545	0.0313325	30.3509	18.1303	26.8071	17.6961	26.302	17.0079	41.8925	38.5014	38.9566	29.9562	32.4018	25.0336
	ENSMUSG00000025647.17	Shisa5	-0.418444	8.82809	63.2847	3.47807e-08	6.69877e-05	496.919	433.729	445.992	393.923	472.859	395.174	659.759	636.738	668.895	565.549	637.933	538.642
	ENSMUSG00000037731.6	Themis2	-0.421416	5.301	21.1025	0.000116603	0.00914717	43.4359	31.784	39.8258	29.5926	38.461	34.4787	64.8198	59.2172	57.752	52.1346	50.7803	38.3196
	ENSMUSG00000091549.2	Gm6548	-0.421794	5.069	24.028	5.32782e-05	0.00560757	54.5853	34.47	42.6954	31.7488	38.589	29.9664	61.0527	59.5579	58.5974	50.5944	61.4938	45.6619
	ENSMUSG00000022587.16	Ly6e	-0.422139	10.9361	30.076	1.22532e-05	0.00253018	2524.78	1924.5	2302.68	1821.88	2016.42	1613.5	3009.51	3001.2	3480.86	2607.27	3103.08	2376.24
	ENSMUSG00000040296.16	Rigi	-0.42449	7.05228	23.0217	6.93411e-05	0.00679072	210.831	136.145	174.631	112.125	174.066	118.593	262.137	235.983	258.063	219.782	232.649	169.921
	ENSMUSG00000049502.18	Dtx3l	-0.425168	6.27865	14.9389	0.000740125	0.0304735	121.713	69.052	99.1094	61.267	95.6086	64.0401	157.698	137.242	134.69	127.68	124.73	90.9741
	ENSMUSG00000033453.9	Adamts15	-0.430304	6.11119	31.1923	9.52105e-06	0.00226079	51.7205	57.8604	59.7736	62.9772	52.6039	62.0732	70.7302	70.1202	75.1816	73.0039	76.3882	82.7228
	ENSMUSG00000022906.16	Parp9	-0.435169	6.61178	21.021	0.000119267	0.00923345	163.833	97.7583	131.306	84.3165	117.943	83.9405	195.109	182.967	188.865	159.946	178.036	121.742
	ENSMUSG00000032712.17	Resf1	-0.435309	6.59846	30.5003	1.11257e-05	0.00250133	98.0212	96.3594	87.2107	64.9847	89.401	93.6015	130.939	131.927	110.106	129.913	124.033	113.84
	ENSMUSG00000026360.10	Rgs2	-0.436923	6.4143	18.4605	0.000248322	0.0152639	69.451	69.2198	84.201	93.8337	77.434	84.6347	75.6014	100.512	92.3511	84.5551	126.907	120.833
	ENSMUSG00000039886.9	Tmem120a	-0.437	3.68577	18.5706	0.000240379	0.0149636	9.75566	12.4786	12.7386	11.9709	10.4312	10.9915	18.2509	12.9474	14.3079	14.5546	15.2428	15.3838
	ENSMUSG00000024561.12	Mbd1	-0.439106	6.683	43.3451	8.24845e-07	0.000567805	84.5491	95.3521	99.8094	77.1786	94.0727	102.453	110.414	122.114	107.635	129.528	127.343	132.72
	ENSMUSG00000027580.18	Helz2	-0.439298	7.71739	32.9722	6.43728e-06	0.00171896	284.385	211.073	258.062	220.903	243.117	177.831	363.394	370.908	369.73	328.748	364.608	252.154
	ENSMUSG00000067212.9	H2-T23	-0.441667	8.66823	14.8168	0.000770192	0.0311201	536.794	345.204	457.681	396.303	460.444	311.118	778.877	677.079	752.987	558.079	630.442	436.48
	ENSMUSG00000020901.14	Pik3r5	-0.442259	4.90167	19.2123	0.00019924	0.0128867	25.7054	26.8598	22.1876	16.6551	22.3983	20.9417	34.813	29.3701	33.2984	33.4986	33.3599	27.4111
	ENSMUSG00000039903.19	Eva1c	-0.442623	3.7188	18.1639	0.000271177	0.0158269	12.8527	12.5346	10.4989	11.7478	10.3032	10.9915	14.7436	15.9457	16.9094	15.2476	16.9848	15.1041
	ENSMUSG00000015053.15	Gata2	-0.44266	7.65341	64.6705	2.87126e-08	6.69877e-05	152.297	206.317	175.751	182.76	161.779	191.368	218.491	226.715	244.535	234.413	237.526	245.301
	ENSMUSG00000006930.16	Hap1	-0.44533	5.38005	21.8621	9.46572e-05	0.00798726	61.089	43.5352	60.8235	35.3178	47.6123	32.3382	76.2509	81.0914	90.0748	65.534	69.2458	51.7455
	ENSMUSG00000029366.11	Dck	-0.446445	4.28085	18.8131	0.000223835	0.0141088	21.6792	18.578	19.3879	13.5323	19.7105	15.5038	28.8377	29.7108	31.3473	26.6449	26.7402	19.929
	ENSMUSG00000027951.17	Adar	-0.449646	6.94593	41.3583	1.19056e-06	0.000665713	167.395	129.598	163.013	117.478	146.869	113.56	216.932	204.909	213.643	196.833	215.141	168.313
	ENSMUSG00000036986.17	Pml	-0.450396	6.55727	48.4707	3.36183e-07	0.000323744	123.339	91.547	118.777	85.5062	103.352	84.2876	167.635	155.368	161.029	145.315	150.163	117.616
	ENSMUSG00000027078.15	Ube2l6	-0.451287	6.41567	12.966	0.00143415	0.0446865	141.147	92.7781	118.427	76.0633	103.224	55.6518	179.651	170.156	196.214	129.066	149.031	106.148
	ENSMUSG00000028121.9	Bcar3	-0.453081	5.84438	46.3536	4.8309e-07	0.000380631	48.004	55.3423	47.245	44.0914	54.9717	51.4288	68.392	65.282	73.8809	61.2986	75.1687	68.0383
	ENSMUSG00000072620.4	Slfn2	-0.453452	6.14763	21.5633	0.000102703	0.008518	105.764	62.6728	72.5123	59.0364	71.8024	58.0815	135.29	124.908	123.243	109.198	112.274	69.0173
	ENSMUSG00000103469.2	Gm9910	-0.456541	2.94219	16.8652	0.000402019	0.0206783	4.33585	6.82686	6.85927	7.73273	6.78347	7.46267	7.85891	6.8144	8.38964	10.0111	7.92625	9.09042
	ENSMUSG00000002307.17	Daxx	-0.459209	6.10411	42.9627	8.84432e-07	0.000567805	99.0277	63.2323	87.5607	60.8953	76.4101	58.1394	132.627	129.746	141.258	105.963	112.361	76.9889
	ENSMUSG00000059089.5	Fcgr4	-0.46096	3.4483	13.7117	0.00111171	0.0384638	13.0075	8.39367	11.4088	5.8739	9.21528	7.92547	21.2385	19.0803	19.7709	12.7064	12.6297	9.37013
	ENSMUSG00000048387.9	Osr1	-0.461411	3.85155	28.6959	1.68667e-05	0.00284454	9.13625	13.206	12.0387	11.8222	10.5592	13.4791	14.159	12.9474	16.1289	15.0936	15.1557	17.4117
	ENSMUSG00000071226.12	Cecr2	-0.465365	3.80606	30.0991	1.21888e-05	0.00253018	12.3107	12.2548	11.5488	12.7144	14.0789	13.6526	15.523	17.1723	21.3968	16.4028	16.8977	17.9711
	ENSMUSG00000024014.9	Pim1	-0.465726	5.98968	26.2887	3.00952e-05	0.00404396	58.4565	59.0915	63.7632	49.2218	60.9873	48.8834	98.139	102.012	107.179	76.7773	77.6947	64.3322
	ENSMUSG00000029605.18	Oas1b	-0.465812	4.50683	16.9155	0.000395838	0.0205433	39.8743	22.4391	34.2963	22.0085	25.79	18.8013	49.9463	48.6548	52.484	43.3557	41.8959	25.9427
	ENSMUSG00000025509.16	Pnpla2	-0.466871	7.48082	14.8848	0.000753293	0.0307962	137.199	142.077	157.273	174.879	172.531	172.22	284.35	182.149	205.969	189.902	200.769	226.631
	ENSMUSG00000039501.15	Znfx1	-0.467115	7.45198	27.8052	2.08277e-05	0.00319492	253.725	175.652	239.304	156.662	215.279	133.692	333.711	333.769	344.886	285.239	309.646	211.387
	ENSMUSG00000061878.17	Sphk1	-0.467261	5.26415	14.825	0.000768151	0.0311201	33.6028	41.129	33.3164	33.7564	31.3576	35.0572	43.6462	57.1047	60.0282	46.359	50.4319	41.8859
	ENSMUSG00000019082.19	Slc25a22	-0.467685	5.86503	36.0867	3.34325e-06	0.00115904	72.3158	56.0697	72.7922	58.6647	59.7713	46.1066	102.296	94.9246	105.293	86.7883	93.7214	67.6187
	ENSMUSG00000030921.18	Trim30a	-0.469165	6.67652	18.3341	0.00025779	0.0154819	195.036	101.06	139.005	76.6581	125.366	79.5439	247.783	211.86	212.928	179.583	182.565	123.77
	ENSMUSG00000042821.8	Snai1	-0.46931	4.71356	20.2862	0.000146509	0.0103656	24.544	24.5655	19.8079	22.6034	22.1423	23.3715	27.0191	36.1163	37.0055	30.4953	29.5275	33.215
	ENSMUSG00000062127.12	Cttnbp2nl	-0.470222	7.50175	71.5452	1.15788e-08	4.01414e-05	157.717	171.623	155.943	165.213	154.228	172.683	202.968	209.679	241.479	216.624	232.561	226.212
	ENSMUSG00000026773.20	Pfkfb3	-0.480857	6.94479	25.6217	3.55166e-05	0.00437348	106.151	123.163	112.688	111.009	127.99	100.081	183.223	147.873	152.639	171.805	157.915	146.985
	ENSMUSG00000020387.16	Jade2	-0.481363	6.34453	34.282	4.86537e-06	0.00142943	70.2253	84.4963	65.583	57.0289	74.4902	63.3459	90.7347	94.3795	106.984	104.192	102.78	91.3238
	ENSMUSG00000024677.14	Ms4a6b	-0.481803	5.23593	13.3976	0.00123669	0.0405233	44.4425	24.4536	25.8272	23.6443	31.8055	22.1566	63.196	49.8814	46.4357	45.4349	45.8155	27.6209
	ENSMUSG00000055491.15	Pprc1	-0.484188	5.47457	38.0616	2.24683e-06	0.000943374	34.6868	43.0316	37.096	32.1949	39.9969	41.7678	56.0516	48.3823	49.4274	53.2127	59.4904	49.5078
	ENSMUSG00000000628.11	Hk2	-0.484538	4.78195	20.8168	0.000126239	0.00963976	25.086	23.4463	27.2971	23.1982	23.6782	26.3797	44.2957	30.1197	35.3796	34.4997	33.5341	33.4248
	ENSMUSG00000118672.1	Muc4	-0.485136	5.93724	19.6293	0.00017665	0.0118684	66.6637	47.4522	70.8324	47.7348	71.0345	45.1809	94.7616	91.4493	85.002	89.0216	87.1888	72.9331
	ENSMUSG00000113651.2	Gm4900	-0.489912	2.07841	14.1042	0.000974508	0.0356374	2.32278	3.74917	3.63961	3.79201	3.39174	4.10736	4.28668	4.29307	4.1623	4.38947	4.18088	5.73396
	ENSMUSG00000026473.17	Glul	-0.493426	8.46652	26.1506	3.11397e-05	0.00408921	290.192	354.045	315.526	304.922	304.68	329.341	441.723	414.997	512.614	433.172	420.875	443.333
	ENSMUSG00000026896.15	Ifih1	-0.49819	6.39565	26.904	2.58841e-05	0.00368487	145.174	83.8248	108.698	64.9847	103.992	73.1804	168.999	158.162	178.849	139.154	151.121	117.616
	ENSMUSG00000030203.18	Dusp16	-0.500046	6.04446	51.1162	2.16931e-07	0.000235018	58.9211	62.2251	52.5644	51.8242	59.4514	59.1228	83.5902	78.0249	74.4662	84.7861	89.5405	76.1498
	ENSMUSG00000045502.7	Hcar2	-0.501378	3.14278	13.4952	0.00119631	0.0398784	8.12972	6.60302	7.62919	6.46873	7.48742	9.08247	15.3281	12.6066	10.6659	10.0881	12.02	8.2513
	ENSMUSG00000032724.6	Abtb2	-0.504738	3.80246	37.9748	2.28578e-06	0.000943374	11.3816	10.4082	10.4289	12.4913	11.3271	12.6692	15.1982	16.8997	17.0394	14.7086	15.7654	16.7823
	ENSMUSG00000001123.16	Lgals9	-0.506763	7.80425	28.3704	1.82103e-05	0.00295006	319.537	222.153	303.768	206.404	265.707	172.104	413.21	410.772	464.032	339.684	405.545	297.886
	ENSMUSG00000026981.16	Il1rn	-0.508071	4.0693	18.2147	0.000267104	0.0157341	22.4535	12.8703	17.1482	8.99674	14.3349	13.2477	38.8399	42.9307	36.8754	22.7174	19.7721	12.5168
	ENSMUSG00000043263.14	Ifi209	-0.511726	5.57933	19.6948	0.000173363	0.011695	85.8653	39.9539	42.2755	35.5408	48.6362	41.305	112.883	91.7219	91.2455	83.1689	79.6109	42.3753
	ENSMUSG00000039236.19	Isg20	-0.513738	5.97288	34.489	4.65762e-06	0.00141641	93.7627	59.8189	77.7617	53.3112	63.803	43.1562	134.771	117.685	123.048	94.0271	93.1117	79.716
	ENSMUSG00000036912.19	Piwil4	-0.515256	2.79765	14.5956	0.000828127	0.0323305	8.90398	5.98749	7.55919	4.23813	6.14352	5.66931	9.74245	11.7889	11.1212	10.1651	10.3651	7.69189
	ENSMUSG00000022018.8	Rgcc	-0.516187	5.99502	20.7755	0.0001277	0.00966614	60.4696	68.2126	63.6232	51.9729	51.132	55.8254	83.3305	77.5479	108.35	87.9435	79.3496	80.625
	ENSMUSG00000029321.2	Slc10a6	-0.517367	5.13619	20.3974	0.000141986	0.0101702	36.0805	36.3166	30.0968	24.3135	25.79	31.4705	43.2565	46.9512	55.4107	43.5867	47.7317	40.1377
	ENSMUSG00000040289.9	Hey1	-0.517642	6.31712	25.9419	3.2793e-05	0.00424739	66.1991	79.5161	56.694	65.6539	60.4113	80.8745	87.4223	93.3573	93.6518	97.3385	87.9727	108.735
	ENSMUSG00000079419.5	Ms4a6c	-0.518065	4.60159	15.2457	0.000670071	0.0280019	35.9256	18.0184	22.7476	19.2575	27.3259	16.2559	54.168	42.4537	50.7931	36.2709	36.4956	21.2576
	ENSMUSG00000044231.4	Nhlrc1	-0.519348	2.72452	12.7035	0.00157083	0.0473543	4.02615	7.72218	4.6895	5.20472	5.69556	5.55361	7.14447	7.97285	6.76374	8.08587	8.88437	7.06256
	ENSMUSG00000040033.17	Stat2	-0.52035	7.46589	26.8624	2.61474e-05	0.00368487	274.707	177.946	244.064	161.346	226.67	152.84	375.864	331.453	375.518	315.58	337.693	232.994
	ENSMUSG00000040483.16	Xaf1	-0.522281	6.40803	18.2325	0.000265692	0.0157341	147.883	88.3015	124.867	68.628	108.792	79.2547	180.56	177.651	208.05	141.618	175.249	117.826
	ENSMUSG00000024079.5	Eif2ak2	-0.525114	5.77455	29.4787	1.40556e-05	0.00270711	91.5174	55.0065	72.6523	44.9093	72.3784	49.404	116.195	109.235	112.317	98.7246	107.309	74.4016
	ENSMUSG00000042510.8	AA986860	-0.525827	6.82533	36.1349	3.3104e-06	0.00115904	107.312	109.901	102.889	85.5805	90.8089	96.0891	144.773	137.651	165.582	139.308	158.002	130.902
	ENSMUSG00000028268.15	Gbp3	-0.526563	6.78534	14.6721	0.000807559	0.0318142	210.366	106.823	132.986	82.8295	150.772	78.9076	269.541	229.577	261.9	186.899	205.299	136.636
	ENSMUSG00000030103.12	Bhlhe40	-0.526817	6.31461	29.3537	1.44682e-05	0.00271519	67.5928	85.5595	86.0208	58.739	75.2581	65.0235	98.2039	110.666	112.772	110.276	117.065	95.5893
	ENSMUSG00000059013.13	Sh2d3c	-0.526928	7.02446	46.0585	5.08588e-07	0.000383299	101.35	125.737	99.5994	113.091	112.055	125.882	135.16	146.237	171.825	171.266	165.145	155.027
	ENSMUSG00000025492.7	Ifitm3	-0.527902	9.20928	35.6498	3.65716e-06	0.001243	905.031	597.63	700.555	558.616	645.198	519.841	1122.59	1087.85	1268.4	925.717	1057.07	790.517
	ENSMUSG00000115902.2	D730005E14Rik	-0.53182	2.58471	15.3565	0.000646577	0.0276735	5.88437	5.14812	5.80938	6.09696	5.88754	4.57016	10.5868	8.79058	9.69036	8.00886	7.57784	7.06256
	ENSMUSG00000033355.7	Rtp4	-0.538283	6.38814	20.7599	0.000128258	0.00966618	151.29	89.1408	125.357	78.1452	104.376	78.5605	189.004	182.422	188.799	150.243	172.287	129.434
	ENSMUSG00000041598.8	Cdc42ep4	-0.541863	7.58369	67.4045	1.98432e-08	5.7327e-05	146.722	187.403	170.572	168.336	160.18	187.029	199.201	227.874	241.804	241.344	247.456	261.454
	ENSMUSG00000039911.14	Spsb1	-0.545422	5.17553	31.3555	9.18042e-06	0.00224132	29.0347	33.8545	37.236	29.6669	30.6536	28.173	39.1647	42.1812	55.2156	49.4393	47.4704	42.655
	ENSMUSG00000062007.14	Hsh2d	-0.547853	2.51209	16.0559	0.000517457	0.0242422	8.74913	5.65174	6.71928	3.27154	7.10345	4.33876	11.2363	11.9252	9.62533	9.16399	10.1909	7.34226
	ENSMUSG00000057596.14	Trim30d	-0.550813	5.6267	23.5926	5.96683e-05	0.00597856	96.2404	51.817	71.1824	37.474	60.4753	34.4787	119.767	112.097	109.456	91.2548	99.9927	64.7518
	ENSMUSG00000091649.4	Phf11b	-0.55604	4.23122	18.3921	0.000253396	0.0154118	32.4414	16.2837	24.0774	14.2758	19.7105	13.4791	41.4379	42.7263	42.0783	33.6526	33.2728	19.4395
	ENSMUSG00000029798.12	Herc6	-0.559439	5.75454	33.7819	5.41007e-06	0.0015493	94.7693	57.3008	70.4825	40.5968	68.7946	39.5695	131.913	124.84	121.162	89.9457	105.829	68.6676
	ENSMUSG00000040428.20	Plekha4	-0.559522	4.20572	37.0432	2.75324e-06	0.00101542	26.0151	18.0744	23.1675	17.0269	19.1345	14.7518	37.1512	41.0227	42.7937	31.3424	31.705	20.1388
	ENSMUSG00000068246.7	Apol9b	-0.560786	4.75144	12.9811	0.00142665	0.0446381	50.6365	28.4825	44.9352	24.5366	36.7331	16.7765	77.3551	63.0332	70.434	55.2149	54.874	34.5436
	ENSMUSG00000049734.10	Trex1	-0.560855	4.9834	35.2187	3.99847e-06	0.00129858	51.9528	29.9934	42.2055	26.321	33.0214	23.4293	70.0158	69.9158	72.1249	55.523	56.3548	36.1519
	ENSMUSG00000094796.3	BC147527	-0.563699	2.16854	13.4543	0.00121304	0.0401388	6.73605	4.08492	4.19955	3.79201	3.58372	2.54541	10.0672	7.70028	7.60921	6.93075	6.88103	4.19558
	ENSMUSG00000016520.8	Lnx2	-0.565762	5.79174	47.9603	3.66522e-07	0.000334383	45.449	52.3206	42.2755	45.9503	44.0286	49.1148	59.0393	65.0775	68.2228	70.9246	68.4619	71.8842
	ENSMUSG00000036040.15	Adamtsl2	-0.56715	6.73158	16.9401	0.000392844	0.0204491	62.7924	90.0361	92.3202	77.8478	76.0261	114.717	81.8366	106.441	128.251	113.587	121.158	143.419
	ENSMUSG00000020638.9	Cmpk2	-0.570103	6.69776	18.869	0.000220202	0.0139306	210.521	112.028	164.692	82.8295	132.022	71.04	261.163	257.244	269.704	203.61	219.583	138.524
	ENSMUSG00000030107.11	Usp18	-0.578367	6.44031	25.0231	4.12926e-05	0.00474017	175.06	94.3449	131.446	70.4125	113.655	56.9824	216.347	213.904	242.519	168.109	183.959	112.442
	ENSMUSG00000042246.6	Tmc7	-0.579483	1.79163	14.232	0.000933892	0.0348131	2.32278	2.74193	3.7796	2.82542	3.39174	2.60326	3.11759	3.74792	4.8777	4.15845	4.70349	4.68506
	ENSMUSG00000071068.8	Treml2	-0.579739	3.41642	17.6224	0.000319034	0.0176581	11.7687	8.44963	8.88905	7.28661	9.40727	9.14032	19.8746	18.5352	13.2673	15.4017	14.2847	10.6987
	ENSMUSG00000021453.3	Gadd45g	-0.580995	4.72842	21.0194	0.00011932	0.00923345	22.9181	22.6629	25.4773	24.3135	23.0382	20.4789	47.4133	51.3806	47.6714	37.8881	30.4856	25.4532
	ENSMUSG00000021614.17	Vcan	-0.582461	3.83066	25.2048	3.94387e-05	0.00465055	18.8919	13.0941	16.5882	8.40191	13.8869	11.5122	30.0717	24.1911	26.1445	25.4897	22.2109	14.265
	ENSMUSG00000028766.11	Alpl	-0.582547	3.23309	22.4483	8.0794e-05	0.00726529	9.83309	8.50559	12.1787	5.50214	7.29543	8.21472	16.1725	15.1961	17.1695	12.3213	12.891	11.6078
	ENSMUSG00000039853.19	Trim14	-0.588866	3.53198	34.5933	4.55653e-06	0.00141041	10.9945	10.1284	13.2286	10.7812	12.223	9.08247	18.5756	17.7174	20.7465	16.6338	16.3751	15.174
	ENSMUSG00000030671.10	Pde3b	-0.590234	3.87582	12.8646	0.00148532	0.0457803	10.4525	10.3522	9.79896	10.5582	13.6949	10.2973	25.2005	12.4704	11.1212	16.1717	14.8073	17.4816
	ENSMUSG00000062939.12	Stat4	-0.590289	2.87851	12.7831	0.00152795	0.0467007	5.41981	4.75642	3.7096	3.12283	4.35166	3.06606	8.11871	7.56399	6.24346	6.39169	6.70683	5.52418
	ENSMUSG00000033863.3	Klf9	-0.59432	7.56222	37.854	2.34122e-06	0.000943783	151.213	197.028	153.774	134.728	162.547	178.294	209.398	211.451	243.235	256.053	253.988	257.189
	ENSMUSG00000068245.15	Phf11d	-0.597405	6.64159	23.6321	5.90558e-05	0.00597856	197.281	98.3739	148.314	79.9297	123.19	73.0069	243.951	217.993	239.528	186.129	214.183	140.902
	ENSMUSG00000017830.16	Dhx58	-0.599222	5.44652	22.8326	7.29095e-05	0.00684014	77.6582	41.6326	69.5026	37.9945	57.2755	31.4126	104.699	100.24	116.544	83.554	85.2725	63.2833
	ENSMUSG00000070327.15	Rnf213	-0.600003	8.29443	29.1619	1.51269e-05	0.00271519	537.723	316.553	441.373	271.687	391.65	241.698	681.387	633.535	713.315	585.34	651.869	446.829
	ENSMUSG00000062488.10	Ifit3b	-0.604359	7.29611	12.7631	0.00153862	0.0467007	344.313	154.332	309.717	120.824	212.591	87.9322	467.833	455.134	457.918	326.438	354.591	210.758
	ENSMUSG00000022346.18	Myc	-0.607425	3.75148	21.3864	0.000107814	0.00877003	12.9301	11.5833	13.3686	7.88144	11.3911	10.818	24.7458	17.9219	19.5108	18.174	20.9044	12.307
	ENSMUSG00000083261.5	Gm7816	-0.609036	3.90962	13.9014	0.00104294	0.0368946	12.6978	14.3812	12.1787	8.84803	12.543	9.37172	14.3539	17.1042	20.2262	18.328	21.3399	17.4117
	ENSMUSG00000060402.9	Chst8	-0.62921	2.64901	20.5679	0.00013534	0.00994062	3.56159	5.37195	4.61951	4.83296	4.92762	5.43791	5.26092	5.04266	6.69871	6.77673	7.92625	8.46108
	ENSMUSG00000039942.16	Ptger4	-0.63438	3.36605	40.5513	1.38649e-06	0.000696987	7.82001	8.05793	7.76917	6.91485	7.93538	8.38827	12.6652	13.4925	13.6576	10.9352	11.3232	12.6567
	ENSMUSG00000046718.9	Bst2	-0.634418	7.2519	26.2357	3.04918e-05	0.00406573	239.943	130.382	199.759	136.587	178.93	114.138	352.352	338.063	375.583	253.896	288.045	195.864
	ENSMUSG00000022584.15	Ly6c2	-0.634718	5.42121	16.0179	0.000523696	0.0244025	66.4314	27.811	31.9166	33.1615	35.1973	33.4374	105.608	84.0897	73.7508	63.6088	69.42	34.0541
	ENSMUSG00000070427.5	Il18bp	-0.645124	4.28527	25.8085	3.3899e-05	0.00428908	28.4927	15.3324	20.2278	12.0452	22.7182	12.0328	42.1523	41.159	45.7853	30.3413	31.2695	20.2786
	ENSMUSG00000037849.9	Ifi206	-0.645592	4.73853	30.3566	1.14945e-05	0.0025221	50.0171	24.8453	31.4966	17.8448	26.7499	23.6029	68.9116	51.9258	54.0449	47.7451	54.7869	34.124
	ENSMUSG00000032690.17	Oas2	-0.652899	5.91344	20.4515	0.000139838	0.0101111	104.06	66.5339	77.2718	51.6011	79.0978	41.0157	155.814	145.624	147.307	121.519	123.51	79.0167
	ENSMUSG00000024675.20	Ms4a4c	-0.653065	4.10631	19.396	0.000188922	0.0124847	34.4545	14.605	13.9285	11.6735	16.5107	13.0163	49.4917	49.2	44.8748	30.1872	29.1791	14.8244
	ENSMUSG00000023067.15	Cdkn1a	-0.655797	6.91398	35.205	4.00987e-06	0.00129858	81.0649	102.85	113.038	94.6516	96.3125	124.609	152.372	150.394	211.952	152.861	150.076	143.559
	ENSMUSG00000028037.14	Ifi44	-0.65933	6.30807	13.9393	0.00102975	0.0366547	173.279	79.7399	126.127	49.9653	115.319	54.2056	212.905	207.907	233.154	171.959	167.758	120.833
	ENSMUSG00000058163.15	Gm5431	-0.663141	3.87052	14.251	0.000928016	0.0348131	26.0925	14.605	20.4378	8.55062	22.7182	10.818	32.4748	33.8676	37.8509	28.9551	35.973	18.8102
	ENSMUSG00000029561.18	Oasl2	-0.673121	8.31696	26.9329	2.57029e-05	0.00368487	609.961	318.96	465.38	259.195	436.83	256.97	801.154	781.408	848.72	623.382	740.103	481.093
	ENSMUSG00000120992.1	ENSMUSG00000120992.1	-0.691824	7.1377	23.6049	5.9478e-05	0.00597856	175.679	136.929	158.253	74.5763	153.844	89.4941	247.004	227.26	284.858	221.322	252.334	174.746
	ENSMUSG00000048756.12	Foxo3	-0.693714	6.65704	100.428	4.70002e-10	8.14702e-06	78.0453	81.0829	74.3321	76.1377	78.0099	97.3039	100.802	125.181	131.698	123.752	129.433	144.398
	ENSMUSG00000046275.3	Trarg1	-0.697157	4.53336	51.89	1.91413e-07	0.000221196	16.2594	20.7044	19.7379	20.8932	18.4946	25.6855	37.1512	23.8504	30.0466	26.4138	33.1857	34.2639
	ENSMUSG00000068699.13	Flnc	-0.699469	4.14577	15.5637	0.000605011	0.0263303	9.36853	13.5978	14.6284	19.5549	13.6309	28.7515	19.8746	18.3989	21.9822	28.4161	26.4789	20.838
	ENSMUSG00000090231.11	Cfb	-0.70202	6.94741	28.9028	1.60687e-05	0.00275778	175.602	82.5378	128.086	78.517	115.447	61.3211	281.622	274.825	307.62	205.612	184.046	96.7081
	ENSMUSG00000037465.11	Klf10	-0.710247	5.84258	25.7649	3.42689e-05	0.00430448	51.1011	48.9071	40.8756	46.5451	41.5328	39.8587	63.4558	81.841	82.0754	88.7905	82.8337	57.2696
	ENSMUSG00000001131.12	Timp1	-0.717147	3.76754	19.1678	0.000201831	0.0130057	18.1177	9.40092	18.758	6.69179	12.415	8.21472	35.3326	37.1385	31.4774	22.6404	20.0334	12.6567
	ENSMUSG00000066861.15	Oas1g	-0.722742	4.14175	25.9292	3.28959e-05	0.00424739	34.0674	18.1863	23.7975	10.7812	24.8301	10.7601	50.9206	47.1557	50.9882	34.8077	38.6731	23.3554
	ENSMUSG00000073489.7	Ifi204	-0.722833	4.99002	14.7091	0.000797823	0.0315741	69.993	24.9572	38.0059	20.6702	33.6614	18.8013	97.4895	84.4305	92.2861	61.6836	65.4133	31.327
	ENSMUSG00000033880.12	Lgals3bp	-0.722887	8.92604	56.5162	9.29844e-08	0.00013282	675.386	431.155	616.774	431.397	534.614	390.315	1023.48	1013.57	1167.46	819.83	964.041	682.621
	ENSMUSG00000026536.10	Ifi211	-0.724973	4.99079	19.3393	0.000192042	0.0125186	71.3092	28.8742	37.866	20.5215	32.4455	14.8096	96.2554	93.3573	95.8631	60.4515	64.9778	30.6977
	ENSMUSG00000074170.6	Plekhf1	-0.729688	3.50933	24.8137	4.35477e-05	0.00487003	6.96833	9.56879	10.7089	9.2198	8.31935	10.4709	11.6909	12.1978	16.3891	15.6327	15.5041	14.8244
	ENSMUSG00000035692.8	Isg15	-0.729906	6.86661	13.7039	0.00111465	0.0384887	253.415	119.862	207.598	84.1678	156.66	62.0732	351.053	332.952	364.852	246.426	276.286	177.333
	ENSMUSG00000057346.13	Apol9a	-0.731189	3.96219	16.4807	0.000452921	0.0224467	28.8024	15.1646	23.5175	13.5323	20.9904	7.75192	48.1927	39.1147	41.1678	35.0388	37.0182	18.2508
	ENSMUSG00000035208.17	Slfn8	-0.731271	4.85321	21.2568	0.000111732	0.0089665	54.7401	28.1468	34.2963	18.3652	34.1093	16.3137	77.9396	69.9839	75.1816	58.2183	62.8874	30.7676
	ENSMUSG00000073490.12	Ifi207	-0.735458	4.89417	40.4728	1.40732e-06	0.000696987	46.1458	25.9644	32.6865	19.778	30.3976	18.8591	73.7179	58.4676	65.8815	54.9839	52.5223	34.5436
	ENSMUSG00000007659.19	Bcl2l1	-0.737392	7.23573	75.9148	6.72517e-09	3.33854e-05	122.565	133.795	110.308	109.968	104.312	130.741	167.635	195.914	231.073	197.526	183.959	209.22
	ENSMUSG00000052776.11	Oas1a	-0.745742	5.69922	27.1839	2.41838e-05	0.0035227	98.6406	50.1382	72.3023	38.515	64.507	31.8176	132.822	123.136	138.917	103.114	117.674	74.4715
	ENSMUSG00000041827.16	Oasl1	-0.749018	5.17867	22.0727	8.94014e-05	0.00763391	76.8839	34.8617	61.5234	25.3544	44.2846	19.1484	109.7	112.165	110.106	83.0919	83.7918	45.8017
	ENSMUSG00000027322.12	Siglec1	-0.749919	4.70587	29.0102	1.56708e-05	0.00271637	25.8602	21.9914	32.8965	16.209	26.238	19.1484	47.8679	42.3174	59.8331	35.9629	45.1187	33.1451
	ENSMUSG00000015947.11	Fcgr1	-0.756832	3.94886	25.6948	3.48743e-05	0.004349	23.0729	11.6952	18.1281	11.5991	14.3989	10.0659	39.2946	35.7075	41.8181	25.1817	28.6564	15.3838
	ENSMUSG00000079339.8	Ifit1bl1	-0.758109	4.8062	24.111	5.21463e-05	0.00554542	58.0694	30.0494	35.6962	14.5732	31.6775	12.6692	76.3808	79.3197	86.1077	55.985	62.8874	28.8096
	ENSMUSG00000024679.11	Ms4a6d	-0.761816	3.66353	17.8625	0.000296762	0.0169213	19.8985	9.79262	12.9486	6.76614	12.1591	6.99987	28.8377	26.6443	33.4935	21.0233	22.8206	11.5378
	ENSMUSG00000039187.17	Fanci	-0.763715	1.26246	17.3188	0.000349824	0.0189495	1.31624	1.17511	1.25987	1.04094	1.3439	1.5041	2.14334	1.63546	2.40633	2.38726	2.78725	1.60831
	ENSMUSG00000054203.8	Ifi205	-0.767351	4.59347	21.61	0.000101398	0.00845017	49.7074	20.2567	28.487	10.4094	24.8301	10.0081	77.485	73.1185	73.5557	47.4371	44.1605	19.4395
	ENSMUSG00000078763.3	Slfn1	-0.779333	4.33302	29.9665	1.25637e-05	0.00253232	29.4218	13.5978	19.5279	13.1605	22.9102	17.1236	55.4021	41.5679	41.2328	35.7318	40.4152	20.2087
	ENSMUSG00000025644.11	Gm7628	-0.787397	0.683283	12.4633	0.00170847	0.0499208	1.00654	1.4549	1.32986	0.966592	0.703945	1.33055	1.62374	1.83989	1.36576	1.8482	2.26464	2.16772
	ENSMUSG00000069793.13	Slfn9	-0.791077	3.96532	23.543	6.04486e-05	0.00602193	24.6214	14.9407	20.9278	9.88898	21.0544	9.66097	34.813	36.1163	39.0216	31.9584	35.973	21.6072
	ENSMUSG00000055866.10	Per2	-0.808369	5.04914	16.4412	0.000458544	0.0225868	28.4153	39.1705	22.1876	19.1831	22.9742	24.0657	37.0863	41.3634	58.0121	53.2127	46.7736	43.634
	ENSMUSG00000027514.15	Zbp1	-0.809255	5.99146	16.1837	0.000497046	0.023735	129.534	53.2159	78.3216	36.0613	85.6253	27.7681	192.901	171.587	176.573	134.919	142.15	69.4368
	ENSMUSG00000020709.16	Adap2	-0.813875	3.94934	56.063	9.96109e-08	0.00013282	10.7622	12.7024	13.5086	9.3685	11.8391	14.8675	17.8612	20.8521	23.413	19.9451	21.1657	22.796
	ENSMUSG00000079017.4	Ifi27l2a	-0.826632	6.62021	34.9533	4.2257e-06	0.00133179	132.398	90.204	114.018	83.4243	102.456	83.4777	248.433	182.081	256.372	158.252	196.501	151.39
	ENSMUSG00000027832.6	Ptx3	-0.83184	1.40768	14.822	0.000768895	0.0311201	2.70991	2.40619	1.74981	1.85883	2.17583	1.09915	8.11871	9.67645	8.25957	3.54238	3.30986	1.53838
	ENSMUSG00000030428.17	Ttyh1	-0.841826	0.909278	15.5581	0.00060608	0.0263303	0.929111	1.34299	1.11988	2.08189	1.08792	1.2727	1.88354	1.63546	1.10561	2.61828	3.22276	1.74816
	ENSMUSG00000030087.12	Klf15	-0.849745	5.7834	30.9471	1.0059e-05	0.00233369	40.1066	51.705	35.9062	42.3813	32.0615	45.1231	54.1031	64.5324	82.4656	72.9268	77.956	76.849
	ENSMUSG00000046031.8	Calhm6	-0.859999	1.75069	15.6485	0.000588845	0.0260384	5.26496	1.95852	2.44974	1.18965	2.75179	1.9669	7.92386	6.74626	7.15396	5.77562	5.66161	2.44742
	ENSMUSG00000045322.11	Tlr9	-0.86545	3.07065	20.7439	0.000128832	0.00966742	8.362	5.53983	6.36932	5.79955	7.55141	6.42136	18.056	14.174	13.0722	14.8626	14.7202	6.99263
	ENSMUSG00000028327.15	Stra6l	-0.866535	0.487322	13.5959	0.00115612	0.0391448	1.16139	0.559578	1.60983	0.817885	1.15191	0.809902	1.88354	1.97618	2.60144	2.00222	2.00334	1.53838
	ENSMUSG00000035385.6	Ccl2	-0.866559	3.06228	16.2887	0.000480936	0.0230978	16.4917	7.49835	8.04914	2.3793	7.55141	2.31401	30.4614	32.164	25.9494	13.9385	15.1557	5.17455
	ENSMUSG00000000204.17	Slfn4	-0.874324	5.09215	18.119	0.000274833	0.0159864	55.2821	28.4825	31.1467	17.8448	30.5256	40.9579	133.472	114.414	89.6196	61.9147	69.42	32.5857
	ENSMUSG00000046694.7	Tent5b	-0.874381	4.28467	33.7455	5.45215e-06	0.0015493	12.9301	16.1159	16.3083	16.0603	13.055	22.5615	25.1355	23.0327	32.3879	24.7197	28.308	31.6766
	ENSMUSG00000121484.1	ENSMUSG00000121484.1	-0.885737	1.98282	12.731	0.00155589	0.0469856	3.01961	2.46214	2.51973	2.67672	3.26375	2.25615	6.10527	6.60997	7.08892	3.85041	4.70349	4.82492
	ENSMUSG00000033576.13	Apol6	-0.915676	3.30138	22.7547	7.44386e-05	0.00693719	11.1493	4.98025	9.51898	7.80709	9.40727	7.80977	31.8253	19.3529	16.7793	14.7086	14.6331	13.2161
	ENSMUSG00000097125.4	Gm26885	-0.958039	0.694836	12.8615	0.00148692	0.0457803	0.851685	0.951283	1.60983	1.33836	1.3439	1.2727	1.49384	2.11246	2.66648	1.46316	2.61305	2.86698
	ENSMUSG00000018986.11	Slfn3	-0.960453	1.37167	16.867	0.000401791	0.0206783	2.78733	2.01448	2.23976	1.85883	2.87978	2.25615	4.35163	2.93019	3.57698	5.39058	5.4874	4.68506
	ENSMUSG00000021750.17	Fam107a	-0.965771	4.44181	25.2173	3.93139e-05	0.00465055	12.0784	17.6267	18.758	22.0085	12.543	15.7931	26.1747	27.2576	41.2979	32.8825	26.8273	30.5578
	ENSMUSG00000028862.7	Map3k6	-0.967486	5.22984	44.1366	7.14863e-07	0.000516309	24.9311	36.8762	24.7074	25.8006	27.1339	28.3466	46.504	57.9906	83.3761	52.3656	55.9193	46.501
	ENSMUSG00000024222.18	Fkbp5	-0.972618	4.80369	31.8253	8.27163e-06	0.00204829	19.2016	22.551	14.8384	12.5657	16.1907	21.231	30.0068	31.4825	51.7686	36.1939	33.2728	33.3549
	ENSMUSG00000106499.2	Gm9403	-0.983311	-0.312854	13.8906	0.00106335	0.037378	0.232278	0.559578	0.27997	0.594826	0.447965	0.867752	0.519598	0.749584	0.845468	0.616066	1.21942	1.04889
	ENSMUSG00000053113.4	Socs3	-0.988727	6.46588	74.8033	7.70402e-09	3.33854e-05	79.439	76.2146	89.4505	48.7757	78.1379	53.7428	168.804	238.027	208.57	141.31	151.905	103.351
	ENSMUSG00000018930.4	Ccl4	-0.999156	1.06882	17.8711	0.000295999	0.0169213	2.0905	1.95852	2.16977	0.817885	1.47189	0.694202	5.52072	5.58781	5.7882	4.38947	2.26464	1.88801
	ENSMUSG00000025498.16	Irf7	-1.01188	8.0464	40.5252	1.39339e-06	0.000696987	487.396	212.696	337.084	157.926	302.44	144.278	771.797	770.436	846.508	574.328	649.082	365.155
	ENSMUSG00000032661.10	Oas3	-1.02749	4.95775	30.0655	1.22827e-05	0.00253018	48.7783	24.2857	32.8965	16.8782	36.9251	17.0079	97.4245	84.6349	90.1399	68.3063	72.2073	33.9143
	ENSMUSG00000002289.17	Angptl4	-1.08994	5.81947	20.3312	0.000144658	0.010319	29.5767	39.2264	53.6143	37.9945	45.1805	34.363	76.9654	97.5823	120.967	71.8487	103.215	64.1924
	ENSMUSG00000004328.16	Hif3a	-1.09044	2.04324	19.6941	0.000173394	0.011695	1.85822	3.1896	2.58972	3.42025	2.49581	4.16521	2.98769	6.20111	7.60921	5.00554	7.22944	5.5941
	ENSMUSG00000022548.15	Apod	-1.11043	6.03311	39.8577	1.58296e-06	0.000722081	114.9	36.5405	66.9129	34.6486	61.8832	29.9085	174.585	180.514	200.961	135.458	146.679	73.7023
	ENSMUSG00000040026.9	Saa3	-1.19062	3.8411	24.9781	4.17656e-05	0.00476292	18.8145	6.37919	12.5987	2.30495	8.83131	2.83466	51.635	59.9667	44.9399	20.6382	16.8977	8.2513
	ENSMUSG00000048636.8	A730049H05Rik	-1.299	0.400331	28.4821	1.77366e-05	0.00292805	1.00654	0.78341	0.55994	0.669179	1.02392	0.752052	1.62374	2.3169	0.97554	1.92521	2.61305	2.16772
	ENSMUSG00000056569.12	Mpz	-1.39311	2.68636	13.4837	0.00120098	0.0398807	2.47763	3.24555	4.40953	5.20472	2.75179	10.1238	11.3662	2.52133	2.86158	10.0881	15.1557	12.2371
	ENSMUSG00000078616.3	Trim30c	-1.42392	0.0239099	20.1547	0.000152064	0.0105859	1.31624	0.50362	1.04989	0.520472	0.25598	0.462801	3.89698	2.18061	2.5364	2.15623	2.26464	0.839116
	ENSMUSG00000120976.1	ENSMUSG00000120976.1	-1.48302	0.407607	16.0611	0.000516606	0.0242422	0.309704	0.559578	0.769918	0.743532	0.575955	2.42971	1.36394	0.817728	0.715396	1.46316	4.44218	1.81808
	ENSMUSG00000111118.2	Gm6545	-1.57128	-0.285969	17.8273	0.000299918	0.0169341	1.00654	0.223831	0.419955	0.0743532	1.02392	0.289251	2.01344	2.04432	1.6259	2.46426	1.74203	0.909042
	ENSMUSG00000040715.13	Rsc1a1	-4.46251	0.284701	13.3277	0.00126655	0.0412677	0.774259	0	0	0	0	0	1.68869	2.79391	5.85324	0	6.53262	1.3286

## Sheet: d IPA Canonical Pathways 2dpi
	Ingenuity Canonical Pathways	-log(p-value)	Ratio	z-score	Molecules
DEGs from BA.5+MP vs. BA.5, 2 dpi, IPA Canonical Pathways analysis.	Coronavirus Pathogenesis Pathway	6.65	0.0931	3.771	EP300,FURIN,IRF7,IRF9,MAPK12,NUP98,OAS1,Oas1b,OAS2,OAS3,PTGS2,RIGI,RIPK1,STAT2,STAT3,STING1,TBK1,TMPRSS2,ZC3HAV1
	PTEN Signaling	1.66	0.053	2.121	BCL2L1,CDKN1A,CDKN1B,CNKSR3,FOXO3,ITGA5,MAP2K1,PIK3R5
	Amyotrophic Lateral Sclerosis Signaling	1.31	0.0517	1.342	BCL2L1,BIRC2,GDNF,GLUL,PIK3C2B,PIK3R5
	Th2 Pathway	1.43	0.0511	1.134	Aph1c,GATA3,PIK3C2B,PIK3R5,S1PR1,SOCS3,STAT4
	Tumor Microenvironment Pathway	3.63	0.0726	0.832	FAS,FGF11,FGF7,FOXO3,HLA-E,ITGA5,MAP2K1,MMP11,MYC,PIK3C2B,PIK3R5,PTGS2,STAT3
	PD-1, PD-L1 cancer immunotherapy pathway	1.46	0.0561	0.816	BCL2L1,CDKN1B,CSK,HLA-E,PIK3C2B,PIK3R5
	Endocannabinoid Cancer Inhibition Pathway	1.72	0.0544	0.707	ATF3,CDKN1A,CDKN1B,CREBBP,MAP2K1,MYC,PIK3C2B,PIK3R5
	Pulmonary Healing Signaling Pathway	1.8	0.0503	0.632	BMP4,EP300,FGF7,MAPK12,MMP11,MYC,MYD88,SMAD9,STAT3,WNT7A
	Role of JAK2 in Hormone-like Cytokine Signaling	1.88	0.0806	0.447	BCL2L1,EPOR,PTPN1,SOCS3,STAT3
	Glioma Invasiveness Signaling	1.6	0.0685	0.447	PIK3C2B,PIK3R5,PLAUR,RHOV,TIMP1
	GDNF Family Ligand-Receptor Interactions	1.54	0.0658	0.447	GDNF,MAP2K1,MAPK12,PIK3C2B,PIK3R5
	Role of MAPK Signaling in Promoting the Pathogenesis of Influenza	1.34	0.0526	0.447	MAP2K1,MAP3K5,MAPK12,PNPLA2,PTGS2,TCIRG1
	Xenobiotic Metabolism AHR Signaling Pathway	1.32	0.0575	0.447	AHR,ALDH5A1,CREBBP,EP300,NQO2
	Sumoylation Pathway	3.25	0.0874	0.378	CREBBP,DAXX,EP300,FAS,ISG20,MAP3K5,MAPK12,PML,RHOV
	Induction of Apoptosis by HIV1	3.18	0.108	0.378	BCL2L1,BIRC2,DAXX,FAS,MAP3K5,MAPK12,RIPK1
	PEDF Signaling	2.53	0.0833	0.378	BCL2L1,FAS,GDNF,MAPK12,PIK3C2B,PIK3R5,PNPLA2
	Aryl Hydrocarbon Receptor Signaling	1.98	0.0566	0.378	AHR,ALDH5A1,CDKN1A,CDKN1B,EP300,FAS,MYC,NQO2,RARA
	IL-13 Signaling Pathway	1.78	0.0603	0.378	BCL2L1,FOSL2,MAPK12,PIK3C2B,PIK3R5,SOCS3,STAT3
	Insulin Receptor Signaling	1.39	0.05	0.378	FOXO3,MAP2K1,PDE3B,PIK3C2B,PIK3R5,PTPN1,SOCS3
	FGF Signaling	3.84	0.105	0.333	CREBBP,FGF11,FGF7,MAP2K1,MAP3K5,MAPK12,PIK3C2B,PIK3R5,STAT3
	ILK Signaling	1.4	0.0448	0.333	CREBBP,FLNC,MAPK12,MYC,PIK3C2B,PIK3R5,PTGS2,RHOV,SNAI1
	RAR Activation	2.36	0.0444	0.229	CDKN1A,CDKN1B,CREBBP,CSK,EP300,HOXA5,KLF2,MAP2K1,MAPK12,MMP11,PDE3B,PDE9A,PIK3C2B,PIK3R5,PML,RARA,RHOV,SOCS3,SORBS3
	IL-9 Signaling	2.96	0.143	0	CISH,PIK3C2B,PIK3R5,SOCS3,STAT3
	Role of MAPK Signaling in Inhibiting the Pathogenesis of Influenza	2.68	0.0886	0	EIF2AK2,MAP2K1,MAP3K5,MAPK12,MYD88,PNPLA2,PTGS2
	Human Embryonic Stem Cell Pluripotency	2.66	0.0597	0	BMP4,FUT4,KLF2,MAP2K1,MYC,NR5A2,PIK3C2B,PIK3R5,SMAD9,SPHK1,STAT3,WNT7A
	TGF-β Signaling	2.21	0.0729	0	BMP4,CREBBP,EP300,IRF7,MAP2K1,MAPK12,SMAD9
	MicroRNA Biogenesis Signaling Pathway	1.98	0.0535	0	ADAR,BMP4,MAPK12,MYC,NUP98,PIK3C2B,PIK3R5,PIWIL4,PNPT1,SMAD9
	STAT3 Pathway	1.92	0.0593	0	CDKN1A,CISH,MAP2K1,MAPK12,MYC,PIM1,SOCS3,STAT3
	CDX Gastrointestinal Cancer Signaling Pathway	1.76	0.0495	0	BMP4,EFNB1,MAP2K1,MAPK12,PIK3C2B,PIK3R5,PTGS2,SNAI1,STAT3,WNT7A
	Pyroptosis Signaling Pathway	1.72	0.0645	0	FOXO3,GBP4,IRF2,MAPK12,PTGER4,TLR9
	Melanoma Signaling	1.58	0.08	0	CDKN1A,MAP2K1,PIK3C2B,PIK3R5
	UVB-Induced MAPK Signaling	1.52	0.0769	0	MAP2K1,MAPK12,PIK3C2B,PIK3R5
	Cardiac Hypertrophy Signaling (Enhanced)	1.38	0.0351	0	ADRA1A,EP300,FGF11,FGF7,ITGA5,MAP2K1,MAP3K5,MAP3K6,MAPK12,MAPK7,MKNK2,MYC,PDE3B,PDE9A,PIK3C2B,PIK3R5,PTGS2,STAT3,WNT7A
	Glioblastoma Multiforme Signaling	1.38	0.0468	0	CDKN1A,CDKN1B,MAP2K1,MYC,PIK3C2B,PIK3R5,RHOV,WNT7A
	Osteoarthritis Pathway	1.36	0.0424	0	ALPL,CREBBP,FOXO3,HES1,ITGA5,NAMPT,PTCH1,PTGS2,SMAD9,SPHK1
	LPS-stimulated MAPK Signaling	1.36	0.0588	0	MAP2K1,MAP3K5,MAPK12,PIK3C2B,PIK3R5
	Bladder Cancer Signaling	1.31	0.0517	0	CDKN1A,FGF11,FGF7,MAP2K1,MMP11,MYC
	IL-12 Signaling and Production in Macrophages	4.52	0.072	-0.243	APOD,DHX58,EP300,FCGR1A,FCGR3A/FCGR3B,GATA3,IFIH1,MAP2K1,MAPK12,MYD88,PIK3C2B,PIK3R5,RIGI,SOCS3,STAT3,STAT4,TLR9
	Role Of Osteoclasts In Rheumatoid Arthritis Signaling Pathway	2.31	0.0485	-0.258	BIRC2,CREBBP,FCGR1A,FCGR3A/FCGR3B,FOXO3,ITGA5,MAP2K1,MAP3K5,MAPK12,MMP11,PIK3C2B,PIK3R5,PTPN1,RHOV,SYK
	JAK/STAT Signaling	5.62	0.134	-0.302	BCL2L1,CDKN1A,CISH,MAP2K1,PIK3C2B,PIK3R5,PTPN1,SOCS3,STAT2,STAT3,STAT4
	Xenobiotic Metabolism General Signaling Pathway	3.37	0.0769	-0.302	AHR,CREBBP,EP300,MAP2K1,MAP3K5,MAP3K6,MAPK12,MAPK7,NQO2,PIK3C2B,PIK3R5
	Mouse Embryonic Stem Cell Pluripotency	3.22	0.0865	-0.333	BMP4,CREBBP,MAP2K1,MAPK12,MYC,PIK3C2B,PIK3R5,SMAD9,STAT3
	HGF Signaling	3.06	0.0758	-0.333	CDKN1A,ITGA5,MAP2K1,MAP3K5,MAP3K6,MAPK12,PIK3C2B,PIK3R5,PTGS2,STAT3
	HOTAIR Regulatory Pathway	1.91	0.0552	-0.333	CDKN1A,CREBBP,EP300,MMP11,MYC,PIK3C2B,PIK3R5,STAT3,WNT7A
	WNT/β-catenin Signaling	1.74	0.0517	-0.333	APPL1,CREBBP,CSNK1D,EP300,MYC,NR5A2,RARA,SOX11,WNT7A
	Production of Nitric Oxide and Reactive Oxygen Species in Macrophages	1.51	0.0471	-0.333	APOD,CREBBP,MAP2K1,MAP3K5,MAP3K6,MAPK12,PIK3C2B,PIK3R5,RHOV
	RANK Signaling in Osteoclasts	2.33	0.0769	-0.378	BIRC2,MAP2K1,MAP3K5,MAP3K6,MAPK12,PIK3C2B,PIK3R5
	Th1 Pathway	1.67	0.0574	-0.378	Aph1c,GATA3,PIK3C2B,PIK3R5,SOCS3,STAT3,STAT4
	IL-6 Signaling	1.56	0.0543	-0.378	IL1RN,MAP2K1,MAPK12,PIK3C2B,PIK3R5,SOCS3,STAT3
	Reelin Signaling in Neurons	1.42	0.0507	-0.378	ITGA5,LIMK1,MAP2K1,MAPK12,PIK3C2B,PIK3R5,RELN
	IL-23 Signaling Pathway	2.43	0.109	-0.447	PIK3C2B,PIK3R5,SOCS3,STAT3,STAT4
	CD40 Signaling	2.39	0.0896	-0.447	MAP2K1,MAPK12,PIK3C2B,PIK3R5,PTGS2,STAT3
	IL-7 Signaling Pathway	2.07	0.0769	-0.447	CDKN1B,FOXO3,MAPK12,MYC,PIK3C2B,PIK3R5
	EGF Signaling	2.06	0.0893	-0.447	MAP2K1,MAPK12,PIK3C2B,PIK3R5,STAT3
	CD27 Signaling in Lymphocytes	2.03	0.0877	-0.447	BCL2L1,MAP2K1,MAP3K5,MAP3K6,MAPK12
	IGF-1 Signaling	2	0.0667	-0.447	CCN1,FOXO3,MAP2K1,PIK3C2B,PIK3R5,SOCS3,STAT3
	Endometrial Cancer Signaling	1.94	0.0833	-0.447	FOXO3,MAP2K1,MYC,PIK3C2B,PIK3R5
	GADD45 Signaling	1.94	0.0833	-0.447	CDKN1A,FOXO3,GADD45G,MAPK12,MYC
	IL-17A Signaling in Airway Cells	1.75	0.0746	-0.447	MAP2K1,MAPK12,PIK3C2B,PIK3R5,STAT3
	Antiproliferative Role of Somatostatin Receptor 2	1.51	0.0649	-0.447	CDKN1A,CDKN1B,MAP2K1,PIK3C2B,PIK3R5
	Neurotrophin/TRK Signaling	1.49	0.0641	-0.447	CREBBP,MAP2K1,MAP3K5,PIK3C2B,PIK3R5
	Thyroid Cancer Signaling	1.47	0.0633	-0.447	GDNF,MAP2K1,MYC,PIK3C2B,PIK3R5
	Colorectal Cancer Metastasis Signaling	2.43	0.0517	-0.535	APPL1,BCL2L1,MAP2K1,MAPK12,MMP11,MYC,PIK3C2B,PIK3R5,PTGER4,PTGS2,RHOV,STAT3,TLR9,WNT7A
	Role of Tissue Factor in Cancer	2.55	0.058	-0.577	BCL2L1,CCN1,FLNC,LIMK1,MAP2K1,MAPK12,MAPK7,PIK3C2B,PIK3R5,PLAUR,PTGS2,SNAI1
	Pancreatic Adenocarcinoma Signaling	2.63	0.0714	-0.707	BCL2L1,CDKN1A,CDKN1B,MAP2K1,MAPK12,PIK3C2B,PIK3R5,PTGS2,STAT3
	NGF Signaling	2.22	0.0667	-0.707	CREBBP,MAP2K1,MAP3K5,MAP3K6,MAPK12,MAPK7,PIK3C2B,PIK3R5
	Role Of Chondrocytes In Rheumatoid Arthritis Signaling Pathway	1.82	0.0567	-0.707	FOXO3,IL1RN,ITGA5,MAPK12,MMP11,PTGS2,RIPK1,STAT3
	Oxytocin In Brain Signaling Pathway	1.42	0.0452	-0.707	CREBBP,MAP2K1,MAPK7,PIK3C2B,PIK3R5,PNPLA2,PTGS2,PTPN1,RGS2
	Serotonin Receptor Signaling	1.4	0.0362	-0.728	ADRA1A,CREBBP,FOXO3,MAP2K1,MAP3K5,MAPK12,MYC,ORAI2,PIK3C2B,PIK3R5,PLAUR,PNPLA2,PTGS2,RAPGEF3,RHOV,SNAI1,STAT3
	Prolactin Signaling	3.51	0.0947	-0.816	CREBBP,EP300,MAP2K1,MYC,NMI,PIK3C2B,PIK3R5,SOCS3,STAT3
	GM-CSF Signaling	2.99	0.1	-0.816	BCL2L1,CISH,MAP2K1,PIK3C2B,PIK3R5,PIM1,STAT3
	Acute Myeloid Leukemia Signaling	2.97	0.0879	-0.816	MAP2K1,MYC,PIK3C2B,PIK3R5,PIM1,PML,RARA,STAT3
	Small Cell Lung Cancer Signaling	2.82	0.0833	-0.816	BCL2L1,BIRC2,CDKN1B,FHIT,MYC,PIK3C2B,PIK3R5,PTGS2
	Leptin Signaling in Obesity	2.12	0.0789	-0.816	MAP2K1,PDE3B,PIK3C2B,PIK3R5,SOCS3,STAT3
	Non-Small Cell Lung Cancer Signaling	1.7	0.0638	-0.816	FHIT,FOXO3,MAP2K1,PIK3C2B,PIK3R5,STK4
	NAD Signaling Pathway	5.04	0.0927	-0.832	NAMPT,NMRK1,NT5E,PARP10,PARP11,PARP12,PARP14,PARP16,PARP9,PIK3C2B,PIK3R5,POLRMT,SIRT5,TPCN2
	Pulmonary Fibrosis Idiopathic Signaling Pathway	1.45	0.0399	-0.832	ADAMTS1,CREBBP,EP300,FOXO3,HES1,MAP2K1,MAPK12,MMP11,PIK3C2B,PIK3R5,SNAI1,STAT3,WNT7A
	Activin Inhibin Signaling Pathway	8.28	0.101	-0.853	CDKN1A,CDKN1B,CREBBP,EP300,EPOR,FOSL2,FOXO3,GATA2,IL1RN,LIMK1,MAP2K1,MAPK12,MAPK7,MYD88,PIK3C2B,PIK3R5,PNPLA2,PTGS2,SMAD9,SNAI1,STAT3,TLR9
	3-phosphoinositide Biosynthesis	3.05	0.0631	-0.905	ALPL,ATP1A1,DUSP14,DUSP16,NOCT,PIK3C2B,PIK3R5,PPFIBP2,PPP1R16B,PTPN1,SOCS3,SSH1,WBP11
	Superpathway of Inositol Phosphate Compounds	2.56	0.0556	-0.905	ALPL,ATP1A1,DUSP14,DUSP16,NOCT,PIK3C2B,PIK3R5,PPFIBP2,PPP1R16B,PTPN1,SOCS3,SSH1,WBP11
	Autophagy	1.98	0.0509	-0.905	CDKN1B,CREBBP,FOXO3,MAP2K1,MAPK12,MYC,MYD88,PIK3C2B,PIK3R5,RIPK1,TBK1
	ID1 Signaling Pathway	4.82	0.0796	-1	ATF3,BCL2L1,BHLHE40,BMP4,CDKN1A,CDKN1B,CREBBP,EP300,FOXO3,MAPK12,MYC,PIK3C2B,PIK3R5,PTGER4,SMAD9,STAT3
	D-myo-inositol (1,4,5,6)-Tetrakisphosphate Biosynthesis	2.56	0.0611	-1	ALPL,ATP1A1,DUSP14,DUSP16,NOCT,PPFIBP2,PPP1R16B,PTPN1,SOCS3,SSH1,WBP11
	D-myo-inositol (3,4,5,6)-tetrakisphosphate Biosynthesis	2.56	0.0611	-1	ALPL,ATP1A1,DUSP14,DUSP16,NOCT,PPFIBP2,PPP1R16B,PTPN1,SOCS3,SSH1,WBP11
	3-phosphoinositide Degradation	2.36	0.0576	-1	ALPL,ATP1A1,DUSP14,DUSP16,NOCT,PPFIBP2,PPP1R16B,PTPN1,SOCS3,SSH1,WBP11
	D-myo-inositol-5-phosphate Metabolism	2.28	0.0561	-1	ALPL,ATP1A1,DUSP14,DUSP16,NOCT,PPFIBP2,PPP1R16B,PTPN1,SOCS3,SSH1,WBP11
	Apelin Pancreas Signaling Pathway	1.7	0.087	-1	MAPK12,PDE3B,PIK3C2B,PIK3R5
	Role of NANOG in Mammalian Embryonic Stem Cell Pluripotency	1.64	0.0565	-1	BMP4,MAP2K1,PIK3C2B,PIK3R5,SMAD9,STAT3,WNT7A
	MYC Mediated Apoptosis Signaling	1.58	0.08	-1	BCL2L1,CREBBP,FAS,MYC
	Macrophage Alternative Activation Signaling Pathway	1.54	0.0476	-1	CREBBP,IL1RN,MAPK12,MYC,PIK3C2B,PIK3R5,SOCS3,STAT3,SYK
	HER-2 Signaling in Breast Cancer	1.46	0.0441	-1	CDKN1A,CDKN1B,FOXO3,MAP2K1,MYC,NUP98,PIK3C2B,PIK3R5,PTGS2,STAT3
	CNTF Signaling	1.4	0.0702	-1	MAP2K1,PIK3C2B,PIK3R5,STAT3
	p53 Signaling	3.41	0.0918	-1.134	BCL2L1,CDKN1A,CSNK1D,EP300,FAS,GADD45G,PIK3C2B,PIK3R5,PML
	Role of JAK family kinases in IL-6-type Cytokine Signaling	2.68	0.0886	-1.134	BCL2L1,MAPK12,MYC,OSMR,SOCS3,STAT3,TIMP1
	p38 MAPK Signaling	2.22	0.0667	-1.134	CREBBP,DAXX,FAS,IL1RN,MAP3K5,MAPK12,MKNK2,MYC
	Gαs Signaling	1.61	0.0556	-1.134	CREBBP,GLP1R,HCAR2,MAP2K1,PTGER4,RAPGEF3,RGS2
	Natural Killer Cell Signaling	2.71	0.0606	-1.155	FCGR3A/FCGR3B,HLA-E,LIMK1,MAP2K1,MAP3K5,MAP3K6,MAPK12,MYD88,PIK3C2B,PIK3R5,STAT4,SYK
	Role Of Osteoblasts In Rheumatoid Arthritis Signaling Pathway	1.99	0.0492	-1.155	ALPL,BMP4,CSNK1D,MMP11,PIK3C2B,PIK3R5,PTGS2,SMAD9,STAT2,STAT3,STAT4,WNT7A
	IL-10 Signaling	2.56	0.0649	-1.265	AHR,BCL2L1,BHLHE40,CDKN1A,CREBBP,HLA-E,IL1RN,MAPK12,SOCS3,STAT3
	Acute Phase Response Signaling	2.47	0.0595	-1.265	CFB,IL1RN,MAP2K1,MAP3K5,MAPK12,MYD88,OSMR,RIPK1,Saa3,SOCS3,STAT3
	Chronic Myeloid Leukemia Signaling	2.74	0.054	-1.291	ADAR,BCL2L1,CDKN1A,CDKN1B,FAS,FOXO3,HES1,MAP2K1,MYC,PIK3C2B,PIK3R5,PTCH1,STAT3,TRIB2,WNT7A
	ERB2-ERBB3 Signaling	2.45	0.0923	-1.342	CDKN1B,MAP2K1,MYC,PIK3C2B,PIK3R5,STAT3
	Thrombopoietin Signaling	1.85	0.0794	-1.342	MAP2K1,MYC,PIK3C2B,PIK3R5,STAT3
	Toll-like Receptor Signaling	1.49	0.0641	-1.342	EIF2AK2,IL1RN,MAPK12,MYD88,TLR9
	Activation of IRF by Cytosolic Pattern Recognition Receptors	8.7	0.2	-1.387	ADAR,CREBBP,DHX58,IFIH1,IRF7,IRF9,ISG15,MAPK12,RIGI,RIPK1,STAT2,TBK1,ZBP1
	IL-33 Signaling Pathway	3.47	0.0699	-1.387	BCL2L1,CREBBP,GATA3,IL1RN,MAP2K1,MAPK12,MYD88,PIK3C2B,PIK3R5,PTGS2,STAT3,SYK,TBK1
	Myelination Signaling Pathway	1.44	0.0398	-1.387	Aph1c,BMP4,CREBBP,CYTH1,EP300,MAP2K1,MPZ,PIK3C2B,PIK3R5,RAPGEF3,SMAD9,WNT7A,XAF1
	FLT3 Signaling in Hematopoietic Progenitor Cells	3.27	0.0976	-1.414	CREBBP,MAP2K1,MAPK12,PIK3C2B,PIK3R5,STAT2,STAT3,STAT4
	Endocannabinoid Developing Neuron Pathway	2.07	0.063	-1.414	CDKN1B,CREBBP,MAP2K1,MAPK12,MAPK7,PIK3C2B,PIK3R5,STAT3
	Transcriptional Regulatory Network in Embryonic Stem Cells	1.47	0.0488	-1.414	BMP4,MAP2K1,MYC,PIK3C2B,PIK3R5,SMAD9,STAT3,WNT7A
	cAMP-mediated signaling	1.71	0.0466	-1.508	CREBBP,GLP1R,HCAR2,MAP2K1,PDE3B,PDE9A,PTGER4,RAPGEF3,RGS2,S1PR1,STAT3
	Role of RIG1-like Receptors in Antiviral Innate Immunity	5.09	0.174	-1.633	CREBBP,DHX58,EP300,IFIH1,IRF7,RIGI,RIPK1,TBK1
	Ceramide Signaling	1.76	0.0659	-1.633	KSR1,MAP2K1,PIK3C2B,PIK3R5,S1PR1,SPHK1
	NRF2-mediated Oxidative Stress Response	1.35	0.0422	-1.633	CREBBP,EP300,FKBP5,HERPUD1,MAP2K1,MAP3K5,MAPK7,NQO2,PIK3C2B,PIK3R5
	Role of Pattern Recognition Receptors in Recognition of Bacteria and Viruses	5.55	0.0962	-1.667	EIF2AK2,IFIH1,IRF7,MAPK12,MYD88,OAS1,Oas1b,OAS2,OAS3,PIK3C2B,PIK3R5,PTX3,RIGI,SYK,TLR9
	Macrophage Classical Activation Signaling Pathway	1.54	0.0476	-1.667	GBP4,IRF9,MYD88,PARP14,PARP9,SOCS3,STAT2,STAT3,TLR9
	NOD1/2 Signaling Pathway	1.54	0.0476	-1.667	BIRC2,IRF7,MAP2K1,MAPK12,MYD88,RIGI,RNF31,TBK1,TLR9
	Ribonucleotide Reductase Signaling Pathway	5.09	0.0882	-1.807	CDKN1A,CREBBP,FOXO3,MAPK12,MYC,PARP10,PARP11,PARP12,PARP14,PARP16,PARP9,PIK3C2B,PIK3R5,SNAI1,STAT3
	Hepatic Fibrosis Signaling Pathway	2.41	0.0449	-1.886	CDKN1B,CREBBP,CSNK1D,IL1RN,ITGA5,KLF9,MAP2K1,MAPK12,MYC,MYD88,PIK3C2B,PIK3R5,PTCH1,RHOV,RIPK1,SNAI1,STAT3,TIMP1,WNT7A
	Retinoic acid Mediated Apoptosis Signaling	3.39	0.117	-1.89	PARP10,PARP11,PARP12,PARP14,PARP16,PARP9,RARA
	PDGF Signaling	2.44	0.0805	-1.89	EIF2AK2,MAP2K1,MYC,PIK3C2B,PIK3R5,SPHK1,STAT3
	MSP-RON Signaling In Macrophages Pathway	1.73	0.0588	-1.89	CREBBP,PIK3C2B,PIK3R5,PTGS2,SOCS3,ST14,STAT3
	RAC Signaling	1.43	0.0511	-1.89	BAIAP2,ITGA5,LIMK1,MAP2K1,MCF2L,PIK3C2B,PIK3R5
	HIF1α Signaling	1.68	0.0481	-1.897	CDKN1A,CREBBP,EP300,HK2,MAP2K1,MKNK2,MMP11,PIK3C2B,PIK3R5,STAT3
	Death Receptor Signaling	6.58	0.135	-1.941	BIRC2,DAXX,FAS,LIMK1,MAP3K5,PARP10,PARP11,PARP12,PARP14,PARP16,PARP9,RIPK1,TBK1
	tRNA Charging	1.94	0.103	-2	AARS1,IARS1,TARS1,VARS1
	Senescence Pathway	4.74	0.0669	-2.065	ATF3,BHLHE40,CBX8,CDKN1A,CDKN1B,CREBBP,EP300,FOXO3,GADD45G,MAP2K1,MAPK12,MAPK7,PIK3C2B,PIK3R5,PML,Saa3,SMAD9,STING1,TBK1,ZFP36L1
	Multiple Sclerosis Signaling Pathway	1.89	0.0495	-2.111	FAS,HLA-E,MAPK12,PARP10,PARP11,PARP12,PARP14,PARP16,PARP9,RNF213,TLR9
	MSP-RON Signaling In Cancer Cells Pathway	1.83	0.0571	-2.121	CREBBP,MAP2K1,MYC,PIK3C2B,PIK3R5,PLAUR,ST14,STAT3
	Role of PKR in Interferon Induction and Antiviral Response	4.19	0.0882	-2.309	ATF3,EIF2AK2,FAS,FCGR1A,IFIH1,IRF9,MAPK12,MYD88,RIGI,STAT2,STAT3,TLR9
	Neuroinflammation Signaling Pathway	3.44	0.0568	-2.324	Aph1c,BIRC2,CREBBP,FAS,GDNF,GLUL,HLA-E,IRF7,MAPK12,MAPK7,MYD88,PIK3C2B,PIK3R5,PTGS2,RIPK1,SYK,TBK1,TLR9
	Pyridoxal 5'-phosphate Salvage Pathway	3.18	0.108	-2.449	CSNK1D,EIF2AK2,LIMK1,MAP2K1,MAP3K6,MAPK7,PIM1
	ERK/MAPK Signaling	1.6	0.0465	-2.53	CREBBP,ITGA5,KSR1,MAP2K1,MKNK2,MYC,PIK3C2B,PIK3R5,RAPGEF3,STAT3
	Interferon Signaling	5.94	0.222	-2.646	IFI35,IFIT1,IFIT3,IFITM3,IRF9,ISG15,OAS1,STAT2
	Ephrin Receptor Signaling	1.38	0.0446	-2.646	CREBBP,EFNB1,EPHA1,ITGA5,LIMK1,MAP2K1,RGS3,SH2D3C,STAT3
	Salvage Pathways of Pyrimidine Ribonucleotides	3.44	0.0928	-2.828	APOBEC3B,CMPK2,CSNK1D,EIF2AK2,LIMK1,MAP2K1,MAP3K6,MAPK7,PIM1
	Necroptosis Signaling Pathway	2.52	0.0641	-3.162	BIRC2,EIF2AK2,FAS,GLUL,IRF9,RIPK1,RNF31,STAT2,TIMM23,ZBP1
	Role of Hypercytokinemia/hyperchemokinemia in the Pathogenesis of Influenza	11.1	0.198	-3.638	CCL4,EIF2AK2,IFIT3,IL1RN,IRF7,IRF9,ISG15,ISG20,MYD88,OAS1,Oas1b,OAS2,OAS3,RIGI,S1PR1,STAT2,TLR9
	Pathogen Induced Cytokine Storm Signaling Pathway	4.83	0.062	-3.962	ADRA1A,BHLHE40,Ccl2,CCL4,DHX58,IFIH1,IL1RN,IRF7,IRF9,MAPK12,MAPK7,MYC,MYD88,RIGI,RIPK1,SOCS3,STAT3,STAT4,STING1,SYK,TBK1,TLR9,ZBP1

## Sheet: e IPA D&F 2dpi
	Categories	Diseases or Functions Annotation	p-value	Predicted Activation State	Activation z-score	Molecules	# Molecules
DEGs from BA.5+MP vs. BA.5, 2 dpi, IPA Diseases and Functions analysis.	Inflammatory Response	Immune response of cells	2.67e-14	Decreased	-4.523	AHR,ATP1A1,BCL2L1,BHLHE40,BIRC2,Ccl2,CCL4,CDKN1A,CDKN1B,CREBBP,CSK,DHX58,EIF2AK2,FAS,FCGR1A,FCGR3A/FCGR3B,FFAR4,FGF7,FURIN,GATA2,GRN,HSH2D,IFIH1,IL1RN,IRF2,IRF7,IRF9,ISG15,KLF2,LIMK1,MYC,MYD88,NAMPT,NR4A2,PFKFB3,PIK3R5,PLAUR,PML,PNP,PTGER4,PTX3,RAPGEF3,RGCC,RIGI,Sf3a2,SGMS1,SIGLEC1,SOCS3,SPHK1,SPTSSA,STAT3,STING1,STK4,SYK,TAPBP,TBK1,TCIRG1,TLR9,TREML2,TREX1,TRIM14,TRIM26,UBE2L6,ZDHHC5	64
	Cellular Function and Maintenance,Inflammatory Response	Phagocytosis	9.68e-07	Decreased	-3.915	Ccl2,CREBBP,CSK,EIF2AK2,FAS,FCGR1A,FCGR3A/FCGR3B,FGF7,GATA2,GRN,HSH2D,IRF7,ISG15,KLF2,LIMK1,MYD88,PFKFB3,PIK3R5,PLAUR,PTGER4,PTX3,RAPGEF3,RARA,RGCC,SGMS1,SIGLEC1,SPHK1,SPTSSA,STING1,SYK,TBK1,TLR9,TREML2,TREX1,ZDHHC5	35
	Cellular Function and Maintenance	Endocytosis	5.08e-07	Decreased	-3.868	ANKFY1,APPL1,BAIAP2,BCL2L1,CCL4,CREBBP,CSK,DPYSL2,EIF2AK2,FAS,FCGR1A,FCGR3A/FCGR3B,FGF7,GRN,HSH2D,IFITM3,ISG15,KLF2,LGALS3BP,LIMK1,MYC,MYD88,PFKFB3,PIK3R5,PLAUR,PLEKHF1,PTGER4,PTPN1,PTX3,RAPGEF3,RARA,RGCC,SF3B3,SGMS1,SIGLEC1,SNX18,SPHK1,SPTSSA,STING1,STK4,STON1,SYK,TLR9,TREML2,TREX1,ZDHHC5	46
	Antimicrobial Response,Inflammatory Response	Antimicrobial response	3.43e-20	Decreased	-3.634	ADAR,ANKRD17,APOBEC3B,BCL2L1,BIRC2,Bst2,CCL4,DDX21,DHX58,DTX3L,EIF2AK2,FCGR1A,HLA-E,IFI16,Ifi27l2a/Ifi27l2b,IFI44,IFIH1,IFIT1,IFIT3,IFITM3,IRF2,IRF7,IRF9,ISG15,ISG20,MOV10,MYD88,NMI,OAS1,Oas1b,OAS2,OAS3,OASL,Oasl2,PARP9,RIGI,RNF213,RNF216,RNF31,RTP4,SAMHD1,SOCS3,STAT2,STING1,STK4,SYK,TBK1,TLR9,TREX1,ZBP1,ZC3HAV1,ZNFX1	52
	Antimicrobial Response,Inflammatory Response	Antiviral response	6.1e-26	Decreased	-3.499	ADAR,APOBEC3B,BCL2L1,BIRC2,Bst2,CCL4,DDX21,DHX58,DTX3L,EIF2AK2,FCGR1A,IFI16,Ifi27l2a/Ifi27l2b,IFI44,IFIH1,IFIT1,IFIT3,IFITM3,IRF2,IRF7,IRF9,ISG15,ISG20,MOV10,MYD88,NMI,OAS1,Oas1b,OAS2,OAS3,OASL,Oasl2,PARP9,RIGI,RNF216,RTP4,SAMHD1,SOCS3,STAT2,STING1,STK4,TBK1,TLR9,TREX1,ZBP1,ZC3HAV1,ZNFX1	47
	Cellular Movement	Cell movement	5.75e-15	Decreased	-3.356	ADAMTS1,ADARB1,ADI1,AHR,ANGPTL4,APOD,APPL1,ATF3,BAIAP2,BCAR3,BCL2L1,BHLHE40,BMP4,CAMSAP3,CASS4,Ccl2,CCL4,CCN1,CDC42EP4,CDKN1A,CDKN1B,CFB,Crnde,CSK,DAXX,DBNL,DCDC2,DCK,DDX24,DGKE,DPYSL2,EFNB1,EFS,EGR3,EIF2AK2,EPB41L4B,EPHA1,EPOR,FAM107A,FAS,FBXO45,FCGR3A/FCGR3B,FFAR4,FGF7,FGL2,FHIT,FLNC,FOSL2,FOXO3,Foxp1,FURIN,FUT4,GATA2,GATA3,GDNF,GEMIN5,GLUL,GPM6A,GRN,HCAR2,HES1,HEY1,HHEX,HK2,HLX,IFI16,IFI35,IFI…	174
	Cell-To-Cell Signaling and Interaction	Response of myeloid cells	4.71e-07	Decreased	-3.235	ATP1A1,CCL4,CREBBP,FAS,FCGR1A,FCGR3A/FCGR3B,FFAR4,GRN,HSH2D,IL1RN,IRF2,ISG15,MYD88,PFKFB3,PIK3R5,PLAUR,PTX3,RAPGEF3,RGCC,RIGI,SIGLEC1,SPHK1,SPTSSA,STAT3,SYK,TBK1,TLR9,ZDHHC5	28
	Cell-To-Cell Signaling and Interaction,Inflammatory Response	Immune response of phagocytes	3.28e-07	Decreased	-3.148	ATP1A1,CCL4,FAS,FCGR1A,FCGR3A/FCGR3B,GRN,HSH2D,IL1RN,IRF2,ISG15,MYD88,PFKFB3,PLAUR,PTX3,RAPGEF3,RGCC,RIGI,SIGLEC1,SPHK1,STAT3,SYK,TAPBP,TBK1,TLR9,UBE2L6	25
	Cellular Movement	Migration of tumor cell lines	9.21e-07	Decreased	-3.112	AHR,ANGPTL4,APPL1,ATF3,BCAR3,BCL2L1,Ccl2,CCL4,CCN1,CDKN1A,CDKN1B,Crnde,CSK,DCDC2,DDX24,DPYSL2,EFNB1,EIF2AK2,EPOR,FGF7,FHIT,FLNC,FOXO3,FURIN,GATA3,GDNF,GLUL,GRN,HES1,HHEX,HK2,IFITM3,ISG15,ITGA5,KLF2,KLF9,LGALS3BP,LIMK1,MAP2K1,MCF2L,MUC20,MYC,NR4A1,NR4A2,NR5A2,PDE3B,PIK3C2B,PIK3R5,PIWIL4,PLAUR,PML,PTGER4,PTGS2,PTPN1,RAPGEF3,RGS3,RHOV,RIGI,RNF144B,Saa3,SDC3,SNAI1,SOCS3,SPHK1,SPSB1,SSH1,ST14,STAT3,ST…	80
	Cell-To-Cell Signaling and Interaction,Inflammatory Response	Immune response of leukocytes	2.88e-10	Decreased	-3.097	ATP1A1,BCL2L1,BHLHE40,Ccl2,CCL4,CDKN1B,FAS,FCGR1A,FCGR3A/FCGR3B,FFAR4,FURIN,GRN,HSH2D,IL1RN,IRF2,ISG15,MYD88,NAMPT,PFKFB3,PLAUR,PNP,PTX3,RAPGEF3,RGCC,RIGI,SIGLEC1,SOCS3,SPHK1,STAT3,SYK,TAPBP,TBK1,TCIRG1,TLR9,TREML2,TREX1,UBE2L6	37
	Cellular Movement	Migration of cells	2.05e-15	Decreased	-3.054	ADAMTS1,ADARB1,ADI1,AHR,ANGPTL4,APOD,APPL1,ATF3,BCAR3,BCL2L1,BHLHE40,BMP4,CAMSAP3,CASS4,Ccl2,CCL4,CCN1,CDKN1A,CDKN1B,CFB,Crnde,CSK,DBNL,DCDC2,DCK,DDX24,DGKE,DPYSL2,EFNB1,EFS,EGR3,EIF2AK2,EPB41L4B,EPHA1,EPOR,FAM107A,FAS,FBXO45,FCGR3A/FCGR3B,FGF7,FGL2,FHIT,FLNC,FOSL2,FOXO3,Foxp1,FURIN,FUT4,GATA2,GATA3,GDNF,GLUL,GPM6A,GRN,HCAR2,HES1,HEY1,HHEX,HK2,HLX,IFI16,IFI35,IFIH1,IFITM3,IL18BP,IL1RN,IRF7,ISG15,…	164
	Immunological Disease,Inflammatory Disease,Inflammatory Response,Neurological Disease,Organismal Injury and Abnormalities	Hashimotos encephalitis	2.29e-07	Decreased	-3.033	AHR,BCL2L1,BHLHE40,Ccl2,DUSP14,FAS,FCGR1A,FCGR3A/FCGR3B,HLA-E,IFI35,IFITM3,IL18BP,IL1RN,IRF9,ISG15,LGALS9B,MAP3K5,MYD88,NMI,NR4A1,NR4A2,NT5E,PTGER4,RGCC,S1PR1,SLFN13,STAT3,STAT4,STING1,TAPBP,TIMP1,TLR9,TOB1,USP18	34
	Inflammatory Disease,Neurological Disease,Organismal Injury and Abnormalities	Myelitis	2.7e-07	Decreased	-2.983	AHR,BCL2L1,BHLHE40,Ccl2,DUSP14,FAS,FCGR1A,FCGR3A/FCGR3B,HLA-E,IFI35,IFITM3,IL18BP,IL1RN,IRF9,ISG15,LGALS9B,MAP3K5,MYD88,NMI,NR4A1,NR4A2,NT5E,PTGER4,RGCC,S1PR1,SLFN13,STAT3,STAT4,STING1,TAPBP,TIMP1,TLR9,TOB1,USP18	34
	Cellular Movement	Cell movement of tumor cell lines	1.71e-07	Decreased	-2.871	AHR,ANGPTL4,APPL1,ATF3,BCAR3,BCL2L1,CASS4,Ccl2,CCL4,CCN1,CDKN1A,CDKN1B,Crnde,CSK,DCDC2,DDX24,DPYSL2,EFNB1,EIF2AK2,EPOR,FFAR4,FGF7,FHIT,FLNC,FOXO3,FURIN,GATA3,GDNF,GEMIN5,GLUL,GRN,HES1,HHEX,HK2,IFITM3,ISG15,ITGA5,KLF2,KLF9,LGALS3BP,LIMK1,MAP2K1,MAPK7,MCF2L,MEOX2,MUC20,MYC,NAMPT,NR4A1,NR4A2,NR5A2,NT5E,ORAI2,PDE3B,PIK3C2B,PIK3R5,PIWIL4,PLAUR,PML,PTGER4,PTGS2,PTPN1,RAPGEF3,RGS3,RHOV,RIGI,RNF144B,S1PR…	90
	Cell-To-Cell Signaling and Interaction	Immune response of myeloid cells	7.14e-07	Decreased	-2.859	ATP1A1,CREBBP,FAS,FCGR1A,FCGR3A/FCGR3B,FFAR4,GRN,HSH2D,IL1RN,IRF2,ISG15,MYD88,PFKFB3,PIK3R5,PLAUR,PTX3,RAPGEF3,RGCC,RIGI,SIGLEC1,SPHK1,SPTSSA,STAT3,SYK,TBK1,ZDHHC5	26
	Antimicrobial Response,Inflammatory Response	Antiviral response of cells	1.9e-08	Decreased	-2.739	BIRC2,DHX58,EIF2AK2,IFIH1,IRF9,MYD88,RIGI,SOCS3,STK4,TBK1,TLR9	11
	Cell-To-Cell Signaling and Interaction	Response of antigen presenting cells	2.51e-07	Decreased	-2.727	ATP1A1,FAS,FCGR1A,GRN,HSH2D,IL1RN,IRF2,ISG15,MYD88,PFKFB3,PLAUR,PTX3,RAPGEF3,RGCC,RIGI,SIGLEC1,SOCS3,SPHK1,STAT3,SYK,TAPBP,TBK1,TLR9,UBE2L6	24
	Cell-To-Cell Signaling and Interaction,Inflammatory Response	Immune response of antigen presenting cells	2.18e-07	Decreased	-2.583	ATP1A1,FAS,FCGR1A,GRN,HSH2D,IL1RN,IRF2,ISG15,MYD88,PFKFB3,PLAUR,PTX3,RAPGEF3,RGCC,RIGI,SIGLEC1,SOCS3,SPHK1,SYK,TAPBP,TBK1,TLR9,UBE2L6	23
	Hematological System Development and Function,Lymphoid Tissue Structure and Development,Tissue Morphology	Quantity of lymphocytes	2.63e-16	Decreased	-2.573	ADAR,AHR,BCL2L1,BHLHE40,BIRC2,Bst2,CALHM6,Ccl2,CCL4,CDKN1A,CDKN1B,CISH,CREBBP,DAXX,DCK,EFNB1,EGR3,EP300,FAS,FCGR1A,FGF7,FOXO3,Foxp1,FUT4,GATA2,GATA3,HCAR2,IFIH1,IL1RN,IRF2,ISG15,KLF10,KLF13,KLF2,LGALS9B,Ly6a (includes others),MAP2K1,MAPK7,MCF2L,Meis1,MPZ,MYC,MYD88,NQO2,NR4A1,NT5E,NUP98,PIM1,PNP,PSMB10,RARA,RASSF2,RGCC,RIGI,RIPK1,RNF31,S1PR1,SH2D3C,SIGLEC1,SLA,Slfn1,SOCS3,SPHK1,ST14,STAT3,STAT4,ST…	79
	Inflammatory Response,Neurological Disease,Organismal Injury and Abnormalities	Inflammation of central nervous system	3.35e-07	Decreased	-2.572	AHR,BCL2L1,BHLHE40,Ccl2,DUSP14,FAS,FCGR1A,FCGR3A/FCGR3B,GRN,HLA-E,IFI35,IFITM3,IL18BP,IL1RN,IRF9,ISG15,LGALS9B,MAP3K5,MYD88,NMI,NR4A1,NR4A2,NT5E,PIK3C2B,PTGER4,PTGS2,RGCC,S1PR1,SLFN13,STAT3,STAT4,STING1,TAPBP,TBK1,TIMP1,TLR9,TOB1,USP18	38
	Gene Expression	Repression of RNA	1.11e-06	Decreased	-2.566	AHR,ATF3,DAXX,ETV6,HES1,KLF10,KLF13,KLF9,MBD1,MYC,NAMPT,NR4A2,PML,RARA,SAFB,SNAI1,STAT3,TSC22D1	18
	Inflammatory Disease,Inflammatory Response,Neurological Disease,Organismal Injury and Abnormalities	Encephalitis	1.36e-07	Decreased	-2.556	AHR,BCL2L1,BHLHE40,Ccl2,DUSP14,FAS,FCGR1A,FCGR3A/FCGR3B,GRN,HLA-E,IFI35,IFITM3,IL18BP,IL1RN,IRF9,ISG15,LGALS9B,MAP3K5,MYD88,NMI,NR4A1,NR4A2,NT5E,PIK3C2B,PTGER4,RGCC,S1PR1,SLFN13,STAT3,STAT4,STING1,TAPBP,TBK1,TIMP1,TLR9,TOB1,USP18	37
	Cellular Development,Cellular Growth and Proliferation,Hematological System Development and Function,Lymphoid Tissue Structure and Development	Proliferation of lymphocytes	4.35e-14	Decreased	-2.534	AHR,APPL1,BCL2L1,BHLHE40,BMP4,Ccl2,CCL4,CDKN1A,CDKN1B,CFB,CISH,CTPS1,DCK,DUSP14,EFNB1,EFS,EGR3,EIF2AK2,EP300,FAS,FCGR3A/FCGR3B,FGL2,FOXO3,Foxp1,GATA2,GATA3,HES1,HLA-E,HSH2D,IL1RN,IRF2,ISG15,ISG20,ITGA5,KLF2,KLF9,KSR1,LGALS9B,Ly6a (includes others),MCF2L,Ms4a4c (includes others),MYC,MYD88,NR4A1,NT5E,NUP98,PARP14,PIM1,PLAUR,PNP,PSMB10,PTGER4,PTGS2,RGS2,S1PR1,SH2D3C,SIGLEC1,Slfn1,Slfn2,SOCS3,SOX11,S…	72
	Tissue Morphology	Quantity of cells	7.03e-14	Decreased	-2.519	ADAMTS1,ADAR,AGRN,AHR,ALPL,APOD,ATF3,BCAR3,BCL2L1,BHLHE40,BIRC2,BMP4,Bst2,CALHM6,CAMSAP3,Ccl2,CCL4,CDKN1A,CDKN1B,CISH,CREBBP,CSK,CUL9,DAXX,DCK,EFNB1,EGR3,EIF2AK2,EP300,EPOR,FANCI,FAS,FCGR1A,FGF7,FLNC,FOSL2,FOXO3,Foxp1,FURIN,FUT4,GATA2,GATA3,GDNF,GLP1R,GPSM2,GREM2,GRN,HAP1,HCAR2,HES1,HEY1,HIF3A,HOXA5,IFIH1,IL18BP,IL1RN,IRF2,ISG15,KLF10,KLF13,KLF2,KLF7,KSR1,LFNG,LGALS9B,Ly6a (includes others),MAP2K…	141
	Cellular Movement,Hematological System Development and Function,Immune Cell Trafficking	Migration of mononuclear leukocytes	8.46e-07	Decreased	-2.493	APOD,Ccl2,CCL4,DBNL,DPYSL2,EFS,FAS,Foxp1,FUT4,GATA3,IFITM3,IL18BP,IRF7,ITGA5,KLF2,LGALS9B,LIMK1,Ly6a (includes others),MAPK7,Muc4,MYD88,NR4A1,NT5E,PLAUR,PTGS2,RIGI,RIPK1,S1PR1,SH2D3C,SOCS3,ST14,STAT3,STING1,STK4,TIMP1,TLR9	36
	Cell-To-Cell Signaling and Interaction,Hematological System Development and Function	Activation of blood cells	3.25e-09	Decreased	-2.432	AGRN,AHR,ATF3,BCL2L1,BHLHE40,Ccl2,CCL4,CDKN1A,CDKN1B,CISH,CSK,DGKE,EGR3,FAS,FCGR1A,FCGR3A/FCGR3B,FOXO3,Foxp1,GATA3,GDNF,GRN,HLA-E,HSH2D,IFI35,IFIH1,IL1RN,ITGA5,KLF2,KSR1,LFNG,LGALS3BP,LGALS9B,LIMK1,MAP2K1,MPZ,MYC,MYD88,NAMPT,NMI,NR4A1,NR4A2,NT5E,PFKFB3,PSME1,PTGER4,PTGS2,RAPGEF3,RIGI,Saa3,SIGLEC1,SPHK1,STAT3,STAT4,STING1,SYK,TBK1,TCIRG1,THEMIS2,TLR9,TREML2,TREX1,USP18,VCAN	63
	Cell Cycle	Cell cycle progression	9.77e-14	Decreased	-2.421	ADARB1,AHR,ANKRD17,ATF3,BAZ1A,BCL2L1,BIRC2,BMP4,BOP1,CCN1,CDKN1A,CDKN1B,CHMP4B,CREBBP,CSK,CSNK1D,CUL9,DCK,DENND2B,EIF2AK2,EIF6,EP300,EPOR,FAS,FGF7,FHIT,FOSL2,FOXO3,GADD45G,GATA2,GATA3,GPSM2,GRN,HES1,IER3,IFI16,IFIH1,IRF7,IRF9,JADE2,JDP2,KLF10,Ly6a (includes others),MAP2K1,MAPK12,MAPK7,Meis1,MYC,NR4A1,NR4A2,NUP98,PARP11,PER2,PHF3,PIM1,PLK2,PML,PNPT1,PTCH1,PTGS2,PTPN1,PTX3,RAPGEF3,RARA,RASSF2,RASSF…	91
	Hematological System Development and Function,Tissue Morphology	Quantity of mononuclear leukocytes	1.19e-16	Decreased	-2.394	ADAR,AHR,ATF3,BCL2L1,BHLHE40,BIRC2,Bst2,CALHM6,Ccl2,CCL4,CDKN1A,CDKN1B,CISH,CREBBP,DAXX,DCK,EFNB1,EGR3,EP300,FAS,FCGR1A,FGF7,FOXO3,Foxp1,FUT4,GATA2,GATA3,HCAR2,IFIH1,IL1RN,IRF2,ISG15,KLF10,KLF13,KLF2,LGALS9B,Ly6a (includes others),MAP2K1,MAPK7,MCF2L,Meis1,MPZ,MYC,MYD88,NQO2,NR4A1,NT5E,NUP98,PIM1,PML,PNP,PSMB10,RARA,RASSF2,RGCC,RIGI,RIPK1,RNF31,S1PR1,SH2D3C,SIGLEC1,SLA,Slfn1,SLFN12L,SOCS3,SPHK1,ST…	82
	Cell Signaling	Protein kinase cascade	5.78e-09	Decreased	-2.38	ADRA1A,ALPK1,ANKRD17,BCAR3,BIRC2,BMP4,Bst2,DAXX,DDX21,DUSP16,EIF2AK2,GADD45G,HES1,KSR1,LGALS9B,MAP2K1,MAP3K5,MAPK12,MAPK7,MUC20,MYC,MYD88,NMI,PLK2,PTGER4,RASSF2,RIPK1,RNF31,SH2D3C,SH3RF2,SHISA5,SOCS3,SORBS3,STAT3,STK40,SYK,TBK1,TLR9,USP10,WNT7A,ZC3HAV1,ZFP36L1	42
	Cell-To-Cell Signaling and Interaction,Hematological System Development and Function,Immune Cell Trafficking,Inflammatory Response	Activation of antigen presenting cells	2.02e-07	Decreased	-2.379	AHR,ATF3,Ccl2,CCL4,FAS,FCGR1A,FCGR3A/FCGR3B,GDNF,GRN,IFI35,IFIH1,IL1RN,ITGA5,LGALS9B,MAP2K1,MYD88,NAMPT,NMI,NR4A1,PFKFB3,PSME1,PTGER4,PTGS2,RAPGEF3,RIGI,SPHK1,STAT3,STAT4,SYK,TLR9,TREX1,USP18	32
	Lymphoid Tissue Structure and Development,Tissue Morphology	Quantity of lymphatic system cells	4.28e-17	Decreased	-2.374	ADAR,AHR,BCL2L1,BHLHE40,BIRC2,Bst2,CALHM6,Ccl2,CCL4,CDKN1A,CDKN1B,CISH,CREBBP,CSK,DAXX,DCK,EFNB1,EGR3,EP300,FAS,FCGR1A,FGF7,FOSL2,FOXO3,Foxp1,FUT4,GATA2,GATA3,HCAR2,IFIH1,IL1RN,IRF2,ISG15,KLF10,KLF13,KLF2,LGALS9B,Ly6a (includes others),MAP2K1,MAPK7,MCF2L,Meis1,MPZ,MYC,MYD88,NQO2,NR4A1,NT5E,NUP98,PIM1,PNP,PSMB10,PTX3,RARA,RASSF2,RGCC,RIGI,RIPK1,RNF31,S1PR1,SH2D3C,SIGLEC1,SLA,Slfn1,SLFN12L,SOCS3,SP…	84
	Inflammatory Response	Immune response of brain	4.99e-08	Decreased	-2.372	AHR,BCL2L1,BHLHE40,Ccl2,DUSP14,FAS,FCGR1A,FCGR3A/FCGR3B,GRN,HLA-E,IFI35,IFITM3,IL18BP,IL1RN,IRF9,ISG15,LGALS9B,MAP3K5,MYD88,NMI,NR4A1,NR4A2,NT5E,PIK3C2B,PTGER4,RGCC,S1PR1,SLFN13,STAT2,STAT3,STAT4,STING1,TAPBP,TBK1,TIMP1,TLR9,TOB1,USP18	38
	Cellular Development,Cellular Growth and Proliferation,Hematological System Development and Function,Lymphoid Tissue Structure and Development	Proliferation of immune cells	2.66e-14	Decreased	-2.356	AHR,APPL1,BCL2L1,BHLHE40,BMP4,Ccl2,CCL4,CDKN1A,CDKN1B,CFB,CISH,CTPS1,DCK,DUSP14,EFNB1,EFS,EGR3,EIF2AK2,EP300,FAS,FCGR3A/FCGR3B,FGL2,FOXO3,Foxp1,GATA2,GATA3,HES1,HHEX,HLA-E,HSH2D,IL1RN,IRF2,ISG15,ISG20,ITGA5,KLF2,KLF9,KSR1,LGALS9B,Ly6a (includes others),MAPK7,MCF2L,Ms4a4c (includes others),MYC,MYD88,NR4A1,NT5E,NUP98,PARP14,PIM1,PLAUR,PNP,PSMB10,PTGER4,PTGS2,RGS2,S1PR1,SH2D3C,SIGLEC1,Slfn1,Slfn2,SO…	76
	Cellular Movement,Hematological System Development and Function,Immune Cell Trafficking	Lymphocyte migration	4.22e-07	Decreased	-2.35	APOD,Ccl2,CCL4,DBNL,DPYSL2,EFS,FAS,Foxp1,FUT4,GATA3,IFITM3,IL18BP,IRF7,ITGA5,KLF2,LGALS9B,LIMK1,Ly6a (includes others),MAPK7,Muc4,MYD88,NR4A1,NT5E,PTGS2,RIGI,RIPK1,S1PR1,SH2D3C,SOCS3,ST14,STAT3,STING1,STK4,TIMP1,TLR9	35
	Cellular Development,Cellular Growth and Proliferation	Proliferation of blood cells	1.15e-15	Decreased	-2.345	AGRN,AHR,APPL1,BCL2L1,BHLHE40,BMP4,Ccl2,CCL4,CDKN1A,CDKN1B,CFB,CISH,CTPS1,DCK,DUSP14,EFNB1,EFS,EGR3,EIF2AK2,EP300,EPOR,ETV6,FAS,FCGR3A/FCGR3B,FGL2,FOXO3,Foxp1,GATA2,GATA3,HES1,HHEX,HLA-E,HOXA5,HSH2D,IL1RN,IRF2,ISG15,ISG20,ITGA5,KLF2,KLF9,KSR1,LGALS9B,Ly6a (includes others),MAPK7,MCF2L,Meis1,Ms4a4c (includes others),MYC,MYD88,NR4A1,NT5E,NUP98,PARP14,PIM1,PLAUR,PNP,PSMB10,PTGER4,PTGS2,RARA,RGS2,S1P…	84
	Cell-To-Cell Signaling and Interaction,Hematological System Development and Function,Immune Cell Trafficking,Inflammatory Response	Activation of leukocytes	1.1e-09	Decreased	-2.336	AGRN,AHR,ATF3,BCL2L1,BHLHE40,Ccl2,CCL4,CDKN1A,CDKN1B,CISH,CSK,EGR3,FAS,FCGR1A,FCGR3A/FCGR3B,FOXO3,Foxp1,GATA3,GDNF,GRN,HLA-E,HSH2D,IFI35,IFIH1,IL1RN,ITGA5,KLF2,KSR1,LFNG,LGALS3BP,LGALS9B,MAP2K1,MPZ,MYC,MYD88,NAMPT,NMI,NR4A1,NR4A2,NT5E,PFKFB3,PSME1,PTGER4,PTGS2,RAPGEF3,RIGI,Saa3,SIGLEC1,SPHK1,STAT3,STAT4,STING1,SYK,TBK1,TCIRG1,THEMIS2,TLR9,TREML2,TREX1,USP18,VCAN	61
	Cellular Growth and Proliferation,Lymphoid Tissue Structure and Development	Proliferation of lymphatic system cells	2.23e-15	Decreased	-2.256	ADAR,AHR,APPL1,BCL2L1,BHLHE40,BMP4,Ccl2,CCL4,CDKN1A,CDKN1B,CFB,CISH,CTPS1,DCK,DUSP14,EFNB1,EFS,EGR3,EIF2AK2,EP300,FAS,FCGR3A/FCGR3B,FGL2,FOXO3,Foxp1,GATA2,GATA3,HES1,HLA-E,HSH2D,IL1RN,IRF2,ISG15,ISG20,ITGA5,KLF2,KLF9,KSR1,LFNG,LGALS9B,Ly6a (includes others),MCF2L,Meis1,Ms4a4c (includes others),MYC,MYD88,NR4A1,NT5E,NUP98,PARP14,PIM1,PLAUR,PNP,PSMB10,PTGER4,PTGS2,RGS2,S1PR1,SH2D3C,SIGLEC1,Slfn1,Slf…	78
	Cellular Development,Cellular Growth and Proliferation,Hematological System Development and Function,Lymphoid Tissue Structure and Development	Cell proliferation of T lymphocytes	1.67e-11	Decreased	-2.255	AHR,APPL1,BCL2L1,BHLHE40,BMP4,Ccl2,CCL4,CDKN1A,CDKN1B,CISH,CTPS1,DCK,DUSP14,EFNB1,EFS,EGR3,EIF2AK2,FAS,FGL2,FOXO3,Foxp1,GATA3,HES1,HLA-E,HSH2D,IRF2,ISG20,KLF2,KSR1,LGALS9B,Ly6a (includes others),MCF2L,Ms4a4c (includes others),MYC,MYD88,NR4A1,NT5E,NUP98,PIM1,PLAUR,PNP,PSMB10,PTGER4,PTGS2,RGS2,SIGLEC1,Slfn1,Slfn2,SOCS3,STAT3,STAT4,STING1,STK4,SYK,TCIRG1,TOB1,Trim30a/Trim30d,ZFP36L1	58
	Hematological System Development and Function,Lymphoid Tissue Structure and Development,Tissue Morphology	Quantity of T lymphocytes	3.74e-13	Decreased	-2.231	ADAR,AHR,BCL2L1,BHLHE40,Bst2,Ccl2,CCL4,CDKN1A,CDKN1B,CISH,CREBBP,DCK,EFNB1,EGR3,EP300,FAS,FGF7,FOXO3,FUT4,GATA3,IL1RN,IRF2,KLF10,KLF13,LGALS9B,MAP2K1,MCF2L,MPZ,MYC,MYD88,NR4A1,NT5E,NUP98,PIM1,PNP,PSMB10,RASSF2,RGCC,RIGI,RIPK1,S1PR1,SH2D3C,SIGLEC1,SLA,Slfn1,SOCS3,SPHK1,ST14,STAT3,STING1,STK4,SYK,TAL1,TAPBP,TCIRG1,TLR9,TOB1,TREX1,TRIB2,Trim30a/Trim30d	60
	Cellular Development,Cellular Growth and Proliferation,Hematological System Development and Function,Hematopoiesis,Lymphoid Tissue Structure and Development,Tissue Development	Hematopoiesis of mononuclear leukocytes	2.58e-11	Decreased	-2.227	AHR,BCL2L1,BHLHE40,BMP4,CCN1,CDKN1A,CDKN1B,CISH,CREBBP,CSK,DCK,EFNB1,EGR3,EP300,FAS,FGL2,FOXO3,Foxp1,FURIN,GADD45G,GATA2,GATA3,HHEX,HLX,IFI16,IL1RN,IRF2,IRF7,KLF10,KLF2,LFNG,LGALS9B,MAP2K1,MCF2L,MYC,MYD88,NQO2,NR4A1,NR4A2,NRARP,PIM1,PNP,PTGER4,PTGS2,RARA,RGCC,RIGI,S1PR1,SLA,SNAI1,SOCS3,SOX11,STAT2,STAT3,STAT4,SYK,TAL1,TAPBP,TCIRG1,THEMIS2,TLR9,USP18,ZBTB1,ZFP36L1	64
	Cellular Development,Cellular Growth and Proliferation,Embryonic Development,Hematological System Development and Function,Hematopoiesis,Lymphoid Tissue Structure and Development,Organ Development,Organismal Development,Tissue Development	Lymphopoiesis	5.19e-11	Decreased	-2.216	AHR,BCL2L1,BHLHE40,BMP4,CCN1,CDKN1A,CDKN1B,CISH,CREBBP,CSK,DCK,EFNB1,EGR3,EP300,FAS,FGL2,FOXO3,Foxp1,FURIN,GADD45G,GATA2,GATA3,HHEX,HLX,IL1RN,IRF2,KLF10,KLF2,LFNG,LGALS9B,MAP2K1,MCF2L,MYC,MYD88,NQO2,NR4A1,NR4A2,NRARP,PIM1,PNP,PTGER4,PTGS2,RGCC,RIGI,S1PR1,SLA,SNAI1,SOCS3,SOX11,STAT2,STAT3,STAT4,SYK,TAL1,TAPBP,TCIRG1,THEMIS2,TLR9,USP18,ZBTB1,ZFP36L1	61
	Cell Death and Survival	Cell viability of tumor cell lines	6.39e-07	Decreased	-2.152	AARS1,ADAMTS1,AEN,AHR,ATF3,BCL2L1,BHLHE40,BIRC2,BMP4,CDKN1A,CDKN1B,Crnde,CUL9,DAXX,DCDC2,DCK,DUSP14,EP300,EPOR,FAS,FFAR4,FHIT,FKBP5,FOXO3,GATA2,HES1,HEY1,HHEX,HK2,HOXA5,IER3,IL1RN,KLF9,LGALS3BP,LNX2,MAP2K1,MAP3K5,MAPK12,MAPK7,MED15,MLXIP,MUC20,MYC,MYCT1,MYD88,NAMPT,NR4A1,PARP14,PIM1,PLEKHG2,PLK2,PML,PPP1R16B,PTGS2,PTPN1,RIPK1,RNF31,RTP4,SF3B3,SOCS3,SOX11,SPHK1,STAT3,STING1,SYK,SYVN1,TAL1,TBK1,TOB…	73
	Connective Tissue Disorders,Inflammatory Disease,Inflammatory Response,Organismal Injury and Abnormalities,Skeletal and Muscular Disorders	Experimentally-induced arthritis	1.19e-07	Decreased	-2.144	AHR,CCL4,CFB,CISH,FAS,FCGR1A,FCGR3A/FCGR3B,FOXO3,IL1RN,MYD88,NAMPT,NQO2,PTGER4,PTGS2,Saa3,SPHK1,STAT3,STAT4,SYVN1,TCIRG1	20
	Neurological Disease,Organismal Injury and Abnormalities,Skeletal and Muscular Disorders	Neuromuscular disease	4.27e-07	Decreased	-2.132	ADAR,ADRA1A,APOD,BAIAP2,BCL2L1,BHLHE40,BIRC2,C19orf12,CCL4,CFB,CLK1,CYTH1,DBNL,DCK,DTX3L,DUSP14,EIF2AK2,EVA1A,FAM107A,FAM3C,FAS,FBXL4,FCGR1A,FCGR3A/FCGR3B,FHIT,FOXO3,Foxp1,FURIN,GDNF,HAP1,HCAR2,HERPUD1,HLA-E,IER3,IFI35,IFI44,IFIH1,IFIT1,IFIT3,IL1RN,IRF7,ISG15,KCTD17,LGALS3BP,LIMK1,Ly6a (includes others),LY6E,MAP2K1,MAP3K5,NMI,NQO2,NR4A1,NR4A2,OAS1,OAS3,PARP12,PARP9,PIK3R5,PLK2,PNPT1,PPRC1,PSME1,P…	76
	Cellular Movement,Hematological System Development and Function,Immune Cell Trafficking	Cell movement of leukocytes	1.97e-09	Decreased	-2.076	AHR,APOD,Ccl2,CCL4,CCN1,CDKN1A,CFB,CSK,DBNL,DPYSL2,EFNB1,EFS,FAS,FGL2,Foxp1,FUT4,GATA2,GATA3,GRN,HCAR2,IFI35,IFIH1,IFITM3,IL18BP,IL1RN,IRF7,ITGA5,KLF15,KLF2,LGALS9B,LIMK1,Ly6a (includes others),MAP3K5,MAPK12,MAPK7,Muc4,MYC,MYD88,NMI,NQO2,NR4A1,NT5E,ORAI2,PIK3R5,PLAUR,PTGER4,PTGS2,PTPN1,PTX3,RGCC,RIGI,RIPK1,S1PR1,SH2D3C,SOCS3,SPHK1,SRCIN1,ST14,STAT2,STAT3,STING1,STK4,SYK,TBK1,TCIRG1,TIMP1,TLR9,TRE…	69
	Cell-To-Cell Signaling and Interaction	Activation of cells	6.19e-10	Decreased	-2.067	AGRN,AHR,ATF3,BCL2L1,BHLHE40,Ccl2,CCL4,CCN1,CDKN1A,CDKN1B,CISH,CSK,DGKE,EGR3,EIF2AK2,FAS,FCGR1A,FCGR3A/FCGR3B,FOXO3,Foxp1,GATA2,GATA3,GDNF,GLP1R,GRN,HLA-E,HSH2D,IER3,IFI16,IFI35,IFIH1,IL1RN,IRF7,ITGA5,KCNJ2,KLF2,KSR1,LFNG,LGALS3BP,LGALS9B,LIMK1,MAP2K1,MEOX2,MPZ,MYC,MYD88,NAMPT,NMI,NR4A1,NR4A2,NT5E,PFKFB3,PLAUR,PPP1R18,PSME1,PTGER4,PTGS2,RAPGEF3,RGCC,RIGI,Saa3,SIGLEC1,SNAI1,SPHK1,STAT3,STAT4,STING…	79
	Cell-To-Cell Signaling and Interaction,Cellular Growth and Proliferation,Hematological System Development and Function	Suppression of blood cells	4.42e-08	Decreased	-2.056	AHR,CCL4,EP300,FKBP5,GATA3,HHEX,KLF10,LGALS9B,MKNK2,PIM1,RAPGEF3,STAT3	12
	Hematological System Development and Function,Tissue Morphology	Quantity of leukocytes	1.45e-16		-1.973	ADAR,AHR,ALPL,ATF3,BCL2L1,BHLHE40,BIRC2,Bst2,CALHM6,Ccl2,CCL4,CDKN1A,CDKN1B,CISH,CREBBP,DAXX,DCK,EFNB1,EGR3,EP300,FAS,FCGR1A,FGF7,FOSL2,FOXO3,Foxp1,FUT4,GATA2,GATA3,GREM2,GRN,HCAR2,IFIH1,IL18BP,IL1RN,IRF2,ISG15,KLF10,KLF13,KLF2,LGALS9B,Ly6a (includes others),MAP2K1,MAPK7,MCF2L,Meis1,MPZ,MYC,MYD88,NQO2,NR4A1,NT5E,NUP98,PIK3R5,PIM1,PML,PNP,PNPLA2,PSMB10,PTGS2,PTX3,RARA,RASSF2,RGCC,RIGI,RIPK1,RNF31,…	94
	Cellular Movement,Immune Cell Trafficking	Migration of lymphatic system cells	8.36e-08		-1.947	APOD,Ccl2,CCL4,DBNL,DPYSL2,EFS,FAS,Foxp1,FUT4,GATA3,IFITM3,IL18BP,IRF7,ITGA5,KLF2,LGALS9B,LIMK1,Ly6a (includes others),MAPK7,Muc4,MYD88,NR4A1,NT5E,PTGS2,RIGI,RIPK1,S1PR1,SH2D3C,SOCS3,SOX11,ST14,STAT3,STING1,STK4,SYK,TIMP1,TLR9	37
	Cell-To-Cell Signaling and Interaction,Cellular Growth and Proliferation	Suppression of cells	4.54e-08		-1.944	AHR,CCL4,EP300,FKBP5,GATA3,HHEX,KLF10,LGALS9B,MKNK2,PIM1,RAPGEF3,STAT3,TBK1,TIMP1	14
	Cellular Movement,Immune Cell Trafficking	Cell movement of lymphatic system cells	9.03e-07		-1.944	APOD,Ccl2,CCL4,DBNL,DPYSL2,EFS,FAS,Foxp1,FUT4,GATA3,IFITM3,IL18BP,IRF7,ITGA5,KLF2,LGALS9B,LIMK1,Ly6a (includes others),MAPK7,Muc4,MYD88,NQO2,NR4A1,NT5E,PTGS2,RIGI,RIPK1,S1PR1,SH2D3C,SOCS3,SOX11,ST14,STAT3,STING1,STK4,SYK,TIMP1,TLR9	38
	Lymphoid Tissue Structure and Development,Tissue Morphology	Quantity of lymphoid tissue	3.89e-07		-1.916	ADAR,AHR,BCL2L1,BHLHE40,CDKN1A,CDKN1B,CREBBP,DCK,EFNB1,EGR3,EP300,FAS,FGF7,GATA2,IFIH1,KLF13,KLF2,MCF2L,MYC,NR4A1,PIM1,PNP,PSMB10,RIGI,RIPK1,SH2D3C,SIGLEC1,Slfn1,ST14,STAT3,STK4,TAL1,TCIRG1,TREX1	34
	Cell Death and Survival,Organismal Injury and Abnormalities	Cell viability of leukocytes	8.48e-07		-1.915	BCL2L1,BMP4,CCL4,CISH,EGR3,FAS,FCGR1A,FCGR3A/FCGR3B,FOXO3,Foxp1,GATA3,HSH2D,KLF2,MAP2K1,MAPK7,MCF2L,MYC,MYD88,PARP14,PIM1,Saa3,STAT3,STAT4,SYK,TLR9	25
	Cellular Development,Cellular Growth and Proliferation,Hematological System Development and Function,Hematopoiesis,Lymphoid Tissue Structure and Development,Tissue Development	Leukopoiesis	1.67e-11		-1.892	AHR,BCL2L1,BHLHE40,BMP4,Ccl2,CCN1,CDKN1A,CDKN1B,CISH,CREBBP,CSK,DCK,EFNB1,EGR3,EIF6,EP300,EPOR,FAS,FCGR1A,FGL2,FOXO3,Foxp1,FURIN,GADD45G,GATA2,GATA3,HES1,HEY1,HHEX,HLX,IFI16,IL1RN,IRF2,IRF7,IRF9,KLF10,KLF2,LFNG,LGALS9B,MAP2K1,MCF2L,MYC,MYD88,NQO2,NR4A1,NR4A2,NRARP,PIM1,PNP,PTGER4,PTGS2,RARA,RGCC,RIGI,RIPK1,S1PR1,SLA,SNAI1,SOCS3,SOX11,STAT2,STAT3,STAT4,SYK,TAL1,TAPBP,TCIRG1,THEMIS2,TIMP1,TLR9,USP1…	73
	Cell-To-Cell Signaling and Interaction,Hematological System Development and Function,Immune Cell Trafficking,Inflammatory Response	Activation of mononuclear leukocytes	4.6e-08		-1.875	AGRN,AHR,BCL2L1,BHLHE40,Ccl2,CCL4,CDKN1A,CDKN1B,CISH,CSK,EGR3,FAS,FCGR3A/FCGR3B,FOXO3,Foxp1,GATA3,HLA-E,HSH2D,IL1RN,ITGA5,KLF2,KSR1,LFNG,MPZ,MYC,MYD88,NAMPT,NR4A1,NR4A2,NT5E,PTGER4,RIGI,Saa3,SIGLEC1,STAT3,STAT4,STING1,SYK,TBK1,TCIRG1,THEMIS2,TLR9,TREML2,TREX1	44
	Cellular Movement	Cell movement of blood cells	6.25e-12		-1.862	AHR,APOD,BHLHE40,BMP4,Ccl2,CCL4,CCN1,CDKN1A,CFB,CSK,DBNL,DPYSL2,EFNB1,EFS,FAS,FCGR3A/FCGR3B,FGL2,FOSL2,Foxp1,FUT4,GATA2,GATA3,GDNF,GRN,HCAR2,IFI35,IFIH1,IFITM3,IL18BP,IL1RN,IRF7,ITGA5,KLF15,KLF2,LGALS9B,LIMK1,Ly6a (includes others),MAP3K5,MAPK12,MAPK7,MPZ,Muc1,Muc4,MYC,MYD88,NMI,NQO2,NR4A1,NT5E,ORAI2,PIK3R5,PLAUR,PTGER4,PTGS2,PTPN1,PTX3,RGCC,RGS3,RIGI,RIPK1,S1PR1,SH2D3C,SLFN12L,SNAI1,SOCS3,SOX11,…	81
	Inflammatory Response	Inflammatory response	9.28e-09		-1.85	AHR,ANGPTL4,AREL1,ART3,ATF3,BIRC2,Ccl2,CCL4,CDKN1A,EFNB1,EFS,FCGR1A,FCGR3A/FCGR3B,FEM1A,FFAR4,FOXO3,GATA3,GDNF,GREM2,GRN,HCAR2,IER3,IFI35,IFIH1,IL1RN,ISG15,ITGA5,LGALS3BP,LGALS9B,LIMK1,MAP2K1,MAPK7,MYD88,NAMPT,NMI,NR4A1,NR4A2,NT5E,PFKFB3,PIK3R5,PLAUR,PTGER4,PTGS2,PTX3,PXK,RAPGEF3,RIPK1,S1PR1,SEMA7A,SGMS1,SOCS3,SPHK1,SRCIN1,STAT3,STAT4,STING1,STK4,SYK,TBK1,TCIRG1,TLR9,TREML2,TREX1,USP18,ZBP1	65
	Cellular Movement,Immune Cell Trafficking	Leukocyte migration	2.47e-11		-1.842	AHR,APOD,BHLHE40,Ccl2,CCL4,CCN1,CDKN1A,CFB,CSK,DBNL,DPYSL2,EFNB1,EFS,FAS,FCGR3A/FCGR3B,FGL2,FOSL2,Foxp1,FUT4,GATA2,GATA3,GDNF,GRN,HCAR2,IFI35,IFIH1,IFITM3,IL18BP,IL1RN,IRF7,ITGA5,KLF15,KLF2,LGALS9B,LIMK1,Ly6a (includes others),MAP3K5,MAPK12,MAPK7,MPZ,Muc1,Muc4,MYC,MYD88,NMI,NQO2,NR4A1,NT5E,ORAI2,PIK3R5,PLAUR,PTGER4,PTGS2,PTPN1,PTX3,RGCC,RGS3,RIGI,RIPK1,S1PR1,SH2D3C,SLFN12L,SNAI1,SOCS3,SOX11,SPHK1…	79
	Hematological System Development and Function,Tissue Morphology	Quantity of blood cells	1.29e-16		-1.812	ADAR,AHR,ALPL,ATF3,BCL2L1,BHLHE40,BIRC2,BMP4,Bst2,CALHM6,Ccl2,CCL4,CDKN1A,CDKN1B,CISH,CREBBP,CSK,DAXX,DCK,EFNB1,EGR3,EIF2AK2,EP300,EPOR,FAS,FCGR1A,FGF7,FOSL2,FOXO3,Foxp1,FUT4,GATA2,GATA3,GREM2,GRN,HCAR2,HOXA5,IFIH1,IL18BP,IL1RN,IRF2,ISG15,KLF10,KLF13,KLF2,LGALS9B,Ly6a (includes others),MAP2K1,MAPK7,MCF2L,Meis1,MPZ,MYC,MYD88,NQO2,NR4A1,NT5E,NUP98,PER2,PIK3R5,PIM1,PML,PNP,PNPLA2,PSMB10,PTGS2,PTX3,R…	101
	Cellular Development,Cellular Growth and Proliferation	Proliferation of leukemia cell lines	5.68e-07		-1.79	AHR,BCL2L1,BIRC2,BMP4,CDKN1A,CDKN1B,EPOR,ETV6,FOSL2,FOXO3,GATA2,HES1,KLF2,MAP2K1,MLXIP,MYC,PIM1,PTGS2,RIPK1,SEC24C,SGMS1,SOCS3,SPHK1,STAT3,SYK,TAL1,USP18	27
	Cell Death and Survival	Cell viability	4.5e-11		-1.75	AARS1,ADAMTS1,ADAR,AEN,AGRN,AHR,AIFM2,APOD,APPL1,ATF3,BCL2L1,BHLHE40,BIRC2,BMP4,CCL4,CCN1,CDKN1A,CDKN1B,CISH,CREBBP,Crnde,CUL9,DAXX,DCDC2,DCK,DUSP14,EFNB1,EGR3,EP300,EPOR,FANCI,FAS,FCGR1A,FCGR3A/FCGR3B,FFAR4,FGF7,FHIT,FKBP5,FOXO3,Foxp1,GATA2,GATA3,GDNF,GLP1R,HAP1,HERPUD1,HES1,HEY1,HHEX,HK2,HOXA5,HSH2D,IER3,IFIH1,IL1RN,KIRREL1,KLF2,KLF9,KSR1,LGALS3BP,LNX2,MAP2K1,MAP3K5,MAPK12,MAPK7,MCF2L,MED15,MLX…	114
	Tissue Morphology	Quantity of progenitor cells	3.14e-11		-1.706	ADAR,AHR,BCL2L1,BHLHE40,BMP4,CDKN1A,CDKN1B,CREBBP,CSK,DAXX,DCK,EFNB1,EGR3,EIF2AK2,EP300,EPOR,FAS,FOSL2,FOXO3,GATA2,GPSM2,HOXA5,KLF13,KLF2,Ly6a (includes others),MCF2L,Meis1,MYC,MYD88,NR4A1,PER2,PIM1,PML,PNP,PTX3,RASSF2,RIPK1,Slfn1,SLFN12L,SOCS3,ST14,STAT3,STAT4,STK4,SYK,TAL1,TCIM,TCIRG1,ZBTB1	49
	Gene Expression	Transactivation	7.85e-10		-1.706	ADAR,AHR,APPL1,CREBBP,DAXX,EGR3,EIF2AK2,EP300,ETV6,FOSL2,FOXO3,GADD45G,GATA3,HERPUD1,HES1,HIF3A,IFI16,IFIH1,IRF2,IRF7,IRF9,JDP2,KLF13,KLF2,MAP2K1,MAPK12,MEOX2,MYC,MYD88,NR4A1,NR4A2,NR5A2,PIM1,PML,PTGS2,PTPN1,RANBP3,RARA,RIGI,SAMHD1,SOCS3,STAT2,STAT3,SYK,TAL1,TBK1,TLR9,ZNF384	48
	Cellular Development,Cellular Growth and Proliferation	Cell proliferation of tumor cell lines	1.71e-10		-1.704	ADAMTS1,ADAMTS15,ADAR,ADIPOR2,AHR,ANGPTL4,ATF3,BCAR3,BCL2L1,BIRC2,BMP4,BOP1,CCDC6,CCN1,CDKN1A,CDKN1B,CMPK2,CREBBP,Crnde,CSNK1D,DDX21,DDX24,DHX58,EIF2AK2,EIF4H,EIF6,EP300,EPHA1,EPOR,ETV6,FAS,FBXO45,FGF7,FHIT,FKBP5,FOSL2,FOXO3,FUT4,GADD45G,GATA2,GATA3,GDNF,GLUL,GRN,HES1,HIF3A,HK2,IER3,IFI16,IFIT1,IFITM3,IL1RN,IRF2,ITGA5,KIRREL1,KLF10,KLF2,KLF7,KLF9,KSR1,LARP1,LGALS3BP,LIMK1,MAP2K1,MAP3K5,MAPK12,MAP…	140
	Cell Death and Survival	Cell viability of blood cells	2.05e-07		-1.694	BCL2L1,BMP4,CCL4,CISH,EGR3,EPOR,FAS,FCGR1A,FCGR3A/FCGR3B,FOXO3,Foxp1,GATA2,GATA3,HSH2D,KLF2,MAP2K1,MAPK7,MCF2L,MYC,MYD88,PARP14,PIM1,Saa3,STAT3,STAT4,SYK,TAL1,TLR9	28
	Cell-mediated Immune Response,Cellular Development,Cellular Function and Maintenance,Cellular Growth and Proliferation,Embryonic Development,Hematological System Development and Function,Hematopoiesis,Lymphoid Tissue Structure and Development,Organ Development,Organismal Development,Tissue Development	T cell development	2.98e-11		-1.656	AHR,BHLHE40,BMP4,CCN1,CDKN1A,CDKN1B,CISH,CREBBP,CSK,DCK,EFNB1,EGR3,EP300,FAS,FGL2,FOXO3,Foxp1,FURIN,GADD45G,GATA2,GATA3,HLX,IRF2,KLF10,KLF2,LFNG,LGALS9B,MAP2K1,MCF2L,MYD88,NR4A1,NR4A2,NRARP,PIM1,PNP,PTGER4,PTGS2,RGCC,RIGI,S1PR1,SLA,SOCS3,STAT2,STAT3,STAT4,SYK,TAL1,TAPBP,TCIRG1,THEMIS2,USP18,ZBTB1,ZFP36L1	53
	Cell Morphology,Cellular Function and Maintenance	Autophagy of cells	4.81e-07		-1.653	ADRA1A,APOL6,APPL1,BAIAP2,BCL2L1,BIRC2,C19orf12,CDKN1A,CDKN1B,CHMP4B,EIF2AK2,EP300,FAS,FOXO3,GRN,HK2,IRF7,LARP1,MAP2K1,MYC,MYD88,NAMPT,NHLRC1,PIK3C2B,PLEKHF1,PLK2,RAPGEF3,RIPK1,SNAI1,SPHK1,STAT3,STING1,TBC1D10A,TBK1,TCIRG1,TLR9,TPCN2,USP10	38
	Cellular Function and Maintenance	Cellular homeostasis	1.85e-14		-1.642	ADAMTS1,ADIPOR2,ADRA1A,AHR,ALPL,ANGPTL4,APOL6,APPL1,ATP1A1,BAIAP2,BCL2L1,BHLHE40,BIRC2,BMP4,C19orf12,Ccl2,CCL4,CCN1,CDKN1A,CDKN1B,CGN,CHERP,CHMP4B,CISH,CREBBP,CSK,CUL9,DCK,EFNB1,EGR3,EIF2AK2,EP300,EPOR,ERO1B,FAS,FBXL4,FCGR1A,FCGR3A/FCGR3B,FFAR4,FGF7,FGL2,FOXO3,Foxp1,FURIN,GADD45G,GATA2,GATA3,GDNF,GLP1R,GRAMD2A,GRN,HELZ2,HERPUD1,HK2,HLX,IL1RN,IRF2,IRF7,ITGA5,KCNJ2,KCTD17,KCTD7,KLF10,KLF15,KLF2,KLF…	132
	Post-Translational Modification	Phosphorylation of protein	1.04e-08		-1.624	ADIPOR2,AGRN,AHR,BMP4,CCL4,CCN1,CDKN1A,CDKN1B,CLK1,CSK,CSNK1D,DAXX,EIF2AK2,EP300,EPHA1,EPOR,FAS,FCGR1A,FGF7,FIZ1,KIRREL1,LIMK1,MAP2K1,MAP3K5,MAP3K6,MAPK12,MAPK7,MARK1,MKNK2,NHLRC1,PIM1,PLAUR,PLK2,PRR5L,PTGER4,PTPN1,RAPGEF3,RARA,RELN,RIPK1,SEMA7A,Sik1,Slfn1,SMAD9,SNRK,SOCS3,SPHK1,STAT2,STAT3,STAT4,STK4,SYK,TBK1,TLR9	54
	Cellular Movement	Cellular infiltration	1.93e-07		-1.597	AHR,APOD,Ccl2,CCL4,CCN1,CDKN1A,CFB,DBNL,EFS,FAS,FGL2,FUT4,GATA2,IFI35,IFIH1,IL18BP,IL1RN,IRF7,KLF15,LIMK1,Ly6a (includes others),MAP3K5,Muc4,MYD88,NMI,NQO2,NR4A1,NT5E,PLAUR,PTGER4,PTGS2,PTPN1,PTX3,RGCC,RIPK1,SOCS3,SPHK1,ST14,STAT3,STING1,TBK1,TCIRG1,TIMP1,TLR9,ZBP1	45
	Cellular Growth and Proliferation,Hematological System Development and Function	Inhibition of blood cells	9.57e-10		-1.596	AHR,CCL4,EP300,FKBP5,GATA3,HHEX,HLA-E,ITGA5,KLF10,LGALS9B,MKNK2,PIM1,PTGER4,PTGS2,RAPGEF3,STAT3,TLR9	17
	Hematological System Development and Function,Humoral Immune Response,Lymphoid Tissue Structure and Development,Tissue Morphology	Quantity of B lymphocytes	4.18e-09		-1.592	ADAR,AHR,CDKN1A,CREBBP,DAXX,DCK,EGR3,EP300,FAS,FCGR1A,Foxp1,IFIH1,IRF2,KLF2,MAPK7,Meis1,MYC,NQO2,NUP98,PIM1,PNP,RARA,RASSF2,RNF31,S1PR1,SH2D3C,SIGLEC1,SLA,SOCS3,SPHK1,STAT3,STK4,SYK,SYVN1,TCIRG1,TLR9,TREX1,TRIB2	38
	Cellular Function and Maintenance	Homeostasis of mononuclear leukocytes	5.62e-11		-1.587	AHR,BHLHE40,BMP4,Ccl2,CCN1,CDKN1A,CDKN1B,CISH,CREBBP,CSK,DCK,EFNB1,EGR3,EP300,FAS,FGL2,FOXO3,Foxp1,FURIN,GADD45G,GATA2,GATA3,HLX,IL1RN,IRF2,KLF10,KLF2,LFNG,LGALS9B,MAP2K1,MCF2L,MYD88,NR4A1,NR4A2,NRARP,PIM1,PNP,PTGER4,PTGS2,RGCC,RIGI,S1PR1,SLA,SOCS3,STAT2,STAT3,STAT4,SYK,TAL1,TAPBP,TCIRG1,THEMIS2,USP18,ZBTB1,ZFP36L1	55
	Cellular Function and Maintenance	Homeostasis of blood cells	1.07e-10		-1.587	AHR,BHLHE40,BMP4,Ccl2,CCN1,CDKN1A,CDKN1B,CISH,CREBBP,CSK,DCK,EFNB1,EGR3,EP300,FAS,FGL2,FOXO3,Foxp1,FURIN,GADD45G,GATA2,GATA3,HLX,IL1RN,IRF2,KLF10,KLF2,LFNG,LGALS9B,MAP2K1,MCF2L,MYD88,NR4A1,NR4A2,NRARP,PIM1,PNP,PTGER4,PTGS2,RGCC,RIGI,S1PR1,SLA,SOCS3,STAT2,STAT3,STAT4,SYK,TAL1,TAPBP,TCIRG1,THEMIS2,Ubap2l,USP18,ZBTB1,ZFP36L1	56
	Cellular Function and Maintenance	Lymphocyte homeostasis	1.37e-10		-1.587	AHR,BHLHE40,BMP4,CCN1,CDKN1A,CDKN1B,CISH,CREBBP,CSK,DCK,EFNB1,EGR3,EP300,FAS,FGL2,FOXO3,Foxp1,FURIN,GADD45G,GATA2,GATA3,HLX,IL1RN,IRF2,KLF10,KLF2,LFNG,LGALS9B,MAP2K1,MCF2L,MYD88,NR4A1,NR4A2,NRARP,PIM1,PNP,PTGER4,PTGS2,RGCC,RIGI,S1PR1,SLA,SOCS3,STAT2,STAT3,STAT4,SYK,TAL1,TAPBP,TCIRG1,THEMIS2,USP18,ZBTB1,ZFP36L1	54
	Gene Expression	Transactivation of RNA	9.64e-10		-1.537	ADAR,AHR,APPL1,CREBBP,DAXX,EGR3,EIF2AK2,EP300,ETV6,FOSL2,FOXO3,GADD45G,GATA3,HERPUD1,HES1,HIF3A,IFI16,IFIH1,IRF2,IRF7,IRF9,JDP2,KLF13,KLF2,MAP2K1,MYC,MYD88,NR4A1,NR4A2,NR5A2,PIM1,PML,PTGS2,PTPN1,RANBP3,RARA,RIGI,SAMHD1,SOCS3,STAT2,STAT3,SYK,TAL1,TBK1,TLR9,ZNF384	46
	Cellular Movement	Invasion of cells	2.19e-07		-1.521	ADAMTS1,ADAMTS15,ADI1,AHR,ANGPTL4,ATF3,BCAR3,BCL2L1,BHLHE40,BMP4,CCN1,CDKN1A,CDKN1B,Crnde,CSK,DBNL,DCK,DPYSL2,EFNB1,EIF2AK2,EPOR,ETV6,FAM107A,FAS,FGF7,FHIT,FOXO3,FURIN,GATA3,GDNF,GLUL,GRN,HCAR2,HES1,HHEX,HK2,IER3,IFITM3,ISG15,ITGA5,KLF2,KLF9,LARP1,LIMK1,MAP2K1,MAPK12,MAPK7,Muc1,MUC20,MYC,MYCT1,MYD88,NAMPT,NR4A1,NR4A2,NT5E,OSR1,PDE3B,PIK3R5,PLAUR,PML,PTGS2,PTPN1,PTX3,RELN,RHOV,RIGI,RNF144B,SEMA7A,…	88
	Cell-To-Cell Signaling and Interaction,Hematological System Development and Function,Immune Cell Trafficking,Inflammatory Response	Activation of T lymphocytes	2.55e-08		-1.501	AGRN,BCL2L1,BHLHE40,Ccl2,CCL4,CDKN1A,CDKN1B,CISH,CSK,EGR3,FAS,FOXO3,Foxp1,GATA3,HLA-E,HSH2D,ITGA5,KLF2,KSR1,LFNG,MPZ,MYC,MYD88,NAMPT,NR4A1,NR4A2,NT5E,PTGER4,RIGI,SIGLEC1,STAT3,STAT4,TBK1,TCIRG1,TLR9,TREML2,TREX1	37
	Cell Death and Survival	Cell survival	3.51e-12		-1.492	AARS1,ADAMTS1,ADAR,AEN,AGRN,AHR,AIFM2,APOD,APPL1,ATF3,BCL2L1,BHLHE40,BIRC2,BMP4,CCL4,CCN1,CDKN1A,CDKN1B,CISH,CREBBP,Crnde,CUL9,DAXX,DCDC2,DCK,DUSP14,EFNB1,EGR3,EIF2AK2,EP300,EPOR,ERCC5,FANCI,FAS,FCGR1A,FCGR3A/FCGR3B,FFAR4,FGF7,FHIT,FKBP5,FOXO3,Foxp1,GATA2,GATA3,GDNF,GLP1R,HAP1,HERPUD1,HES1,HEY1,HHEX,HK2,HLX,HOXA5,HSH2D,IER3,IFIH1,IL1RN,ITGA5,JDP2,KIRREL1,KLF2,KLF9,KSR1,LGALS3BP,LNX2,MAP2K1,MAP3K5…	121
	Connective Tissue Disorders,Inflammatory Disease,Inflammatory Response,Organismal Injury and Abnormalities,Skeletal and Muscular Disorders	Inflammation of joint	2.12e-14		-1.486	ADAMTS1,ADAMTS15,ADRA1A,AHR,ALPL,BHLHE40,BMP4,CCDC6,Ccl2,CCL4,CDKN1A,CFB,CHST8,CISH,CSK,DAXX,EFNB1,EPOR,FAS,FCGR1A,FCGR3A/FCGR3B,FGL2,FKBP5,FLNC,FOXO3,FRY,FURIN,GLP1R,GLUL,GRN,HELZ2,HES1,HLA-E,IL18BP,IL1RN,ITGA5,KLF13,KSR1,LAP3,LGALS9B,LRIG3,LY6E,MBD1,MMP11,Ms4a4c (includes others),MS4A6A,Ms4a6c,MYD88,NAA25,NAMPT,NQO2,NR4A1,NR4A2,PDE3B,PLAUR,PTGER4,PTGS2,PTPN1,PTX3,RCSD1,RGCC,RNF144B,S1PR1,Saa3,S…	89
	Connective Tissue Disorders,Inflammatory Disease,Organismal Injury and Abnormalities,Skeletal and Muscular Disorders	Rheumatic Disease	1.77e-18		-1.485	ADAMTS1,ADAMTS15,ADAR,ADRA1A,AHR,ALPL,BHLHE40,BMP4,CCDC6,Ccl2,CCL4,CDKN1A,CFB,CHST8,CISH,CSK,DAXX,DCK,EFNB1,EGR3,EPOR,FAS,FCGR1A,FCGR3A/FCGR3B,FGL2,FKBP5,FLNC,FOXO3,FRY,FURIN,GLP1R,GLUL,GRN,HELZ2,HES1,HLA-E,IFI35,IFIH1,IFIT1,IFIT3,IFITM3,IL18BP,IL1RN,IRF7,IRF9,ISG15,ISG20,ITGA5,KCNJ2,KLF13,KSR1,LAP3,LGALS9B,LRIG3,LY6E,MBD1,MMP11,Ms4a4c (includes others),MS4A6A,Ms4a6c,MYC,MYD88,NAA25,NAMPT,NQO2,NR…	107
	Cell-To-Cell Signaling and Interaction,Hematological System Development and Function,Immune Cell Trafficking,Inflammatory Response	Activation of lymphocytes	3.37e-08		-1.481	AGRN,AHR,BCL2L1,BHLHE40,Ccl2,CCL4,CDKN1A,CDKN1B,CISH,CSK,EGR3,FAS,FCGR3A/FCGR3B,FOXO3,Foxp1,GATA3,HLA-E,HSH2D,IL1RN,ITGA5,KLF2,KSR1,LFNG,MPZ,MYC,MYD88,NAMPT,NR4A1,NR4A2,NT5E,PTGER4,RIGI,SIGLEC1,STAT3,STAT4,STING1,SYK,TBK1,TCIRG1,THEMIS2,TLR9,TREML2,TREX1	43
	Lymphoid Tissue Structure and Development,Organ Morphology,Tissue Morphology	Quantity of lymphoid organ	2.76e-07		-1.481	ADAR,AHR,BCL2L1,BHLHE40,CDKN1A,CDKN1B,CREBBP,DCK,EFNB1,EGR3,EP300,FAS,FGF7,GATA2,KLF13,MCF2L,MYC,NR4A1,PIM1,PNP,PSMB10,RIPK1,Slfn1,ST14,STAT3,STK4,TAL1,TREX1	28
	Cardiovascular System Development and Function,Embryonic Development,Organ Development,Organismal Development,Tissue Development	Cardiogenesis	4.75e-07		-1.48	ADRA1A,AGRN,ANKRD17,BMP4,CCN1,CDKN1A,CDKN1B,EP300,EPOR,FLNC,FOXO3,Foxp1,FURIN,GATA3,HES1,HEY1,HHEX,IFI16,KLF10,KLF15,KLF7,LY6E,MAP2K1,MAPK7,MYC,MYD88,OSR1,PIM1,PNPLA2,PTCH1,RAPGEF3,RARA,RGS2,S1PR1,SIX4,SMAD9,SMTN,SNAI1,SOX11,SPHK1,STK4,TREX1,VCAN,ZFP36L1	44
	Cellular Growth and Proliferation	Inhibition of cells	3.22e-10		-1.474	AHR,BCL2L1,CCL4,EP300,FKBP5,GATA3,HHEX,HK2,HLA-E,IL1RN,ITGA5,KLF10,LGALS9B,MKNK2,PIM1,PTGER4,PTGS2,RAPGEF3,SEMA7A,STAT3,TBK1,TIMP1,TLR9	23
	Organismal Injury and Abnormalities,Respiratory Disease	Lung lesion	1.33e-09		-1.469	AASS,ABCA8,ADAMTS1,ADAMTSL2,ADAR,ADRA1A,AEN,AGRN,AHR,AIFM2,ALPK1,ALPL,ANGPTL4,ANKFY1,ANKRD17,APOBEC3B,APOD,ARFGAP2,ATF3,ATP13A1,ATP1A1,BAZ1A,BCAR3,BCL2L1,CASS4,CBX8,CCDC25,Ccl2,CCN1,CDC42EP4,CDKN1A,CDKN1B,CECR2,CEP70,CGN,CHMP4B,CISH,CLK1,CREBBP,CSK,CTTNBP2NL,CUL9,DCK,DDX21,DDX24,DDX27,DNAH6,DPY19L4,DTX2,DTX3L,EFS,EGR3,EP300,EPB41L4B,EPHA1,ERCC5,ERO1B,ESYT3,EVA1A,FAM107A,FAM3C,FANCI,FAS,FCGR1A,FCG…	239
	Inflammatory Response,Organismal Injury and Abnormalities	Inflammation of absolute anatomical region	4.14e-13		-1.464	ADIPOR2,ADRA1A,AHR,ALDH5A1,ALPL,ATF3,BCL2L1,BHLHE40,BIRC2,Ccl2,CCL4,CCN1,CDKN1A,CFB,CISH,CSK,DUSP14,EFS,EP300,EPOR,FAS,FBXL4,FCGR1A,FCGR3A/FCGR3B,FEM1A,FOXO3,GATA2,GDNF,GLP1R,GRN,HCAR2,HLA-E,HOXA5,IFI16,IFI35,IFI44,IFIH1,IFIT3,IFITM3,IL18BP,IL1RN,IRF7,IRF9,ISG15,ISG20,KDM5C,KLF2,KSR1,LGALS9B,Ly6a (includes others),MAP2K1,MAP3K5,Ms4a4c (includes others),MS4A6A,Muc4,MYD88,NAMPT,NMI,NQO2,NR4A1,NR4A2…	104
	Hematological System Development and Function,Hematopoiesis,Tissue Morphology	Quantity of hematopoietic progenitor cells	6.88e-11		-1.45	ADAR,AHR,BCL2L1,BHLHE40,CDKN1A,CDKN1B,CREBBP,CSK,DAXX,DCK,EFNB1,EGR3,EIF2AK2,EP300,EPOR,FAS,FOSL2,FOXO3,GATA2,HOXA5,KLF13,KLF2,Ly6a (includes others),MCF2L,Meis1,MYC,MYD88,NR4A1,PER2,PIM1,PML,PNP,PTX3,RASSF2,RIPK1,Slfn1,SLFN12L,SOCS3,ST14,STAT3,STAT4,STK4,SYK,TAL1,TCIM,TCIRG1,ZBTB1	47
	Cellular Movement	Cellular infiltration by blood cells	3.31e-08		-1.397	AHR,APOD,Ccl2,CCL4,CCN1,CDKN1A,CFB,DBNL,EFS,FAS,FGL2,FUT4,GATA2,IFI35,IFIH1,IL18BP,IL1RN,IRF7,KLF15,LIMK1,Ly6a (includes others),MAP3K5,Muc4,MYD88,NMI,NQO2,NR4A1,NT5E,PTGER4,PTGS2,PTPN1,PTX3,RGCC,RIPK1,SOCS3,SPHK1,ST14,STAT3,STING1,TBK1,TCIRG1,TIMP1,TLR9,ZBP1	44
	Cell Death and Survival,Organismal Injury and Abnormalities	Cell viability of mononuclear leukocytes	4.83e-08		-1.391	BCL2L1,BMP4,CISH,EGR3,FAS,FCGR3A/FCGR3B,FOXO3,Foxp1,GATA3,HSH2D,KLF2,MAP2K1,MAPK7,MCF2L,MYC,MYD88,PARP14,PIM1,Saa3,STAT3,STAT4,SYK,TLR9	23
	Cellular Development,Cellular Growth and Proliferation,Hematological System Development and Function	Colony formation of leukocyte cell lines	3.1e-07		-1.387	IFIH1,MLXIP,MYC,PNPT1,STAT3	5
	Cell Death and Survival	Cell viability of lymphatic system cells	3.35e-08		-1.373	ADAR,BCL2L1,BMP4,CISH,EGR3,FAS,FCGR3A/FCGR3B,FOXO3,Foxp1,GATA3,HSH2D,KLF2,MAP2K1,MAPK7,MCF2L,MYC,MYD88,PARP14,PIM1,SOX11,STAT3,STAT4,SYK,TLR9	24
	Inflammatory Response	Innate immune response	3.29e-12		-1.355	ADAR,ALPK1,ANKRD17,APPL1,BIRC2,Bst2,DHX58,EIF2AK2,GRN,IFI16,IFI35,IFIH1,IRF7,ISG15,LGALS9B,MYD88,NMI,PML,PTX3,RIGI,SAMHD1,Sf3a2,STING1,SYK,TBK1,TLR9,TRAFD1,TREX1,TRIM14,TRIM26,ZBP1	31
	Gene Expression	Transcription of RNA	4.34e-16		-1.341	AGRN,AHR,ATF3,BCL2L1,BHLHE40,BIRC2,BMP4,BNC1,CBX8,CCN1,CDKN1A,CDKN1B,CISH,CREBBP,DAXX,DDX21,DTX3L,EGR3,EIF2AK2,ELL2,EP300,ETV6,FANCI,FCGR1A,FGF7,FHIT,FOSL2,FOXO3,Foxp1,GATA2,GATA3,GDNF,GLP1R,GMEB1,GRN,HELZ2,HES1,HEY1,HHEX,HIF3A,HOXA5,IFI16,IQCE,IRF2,IRF2BPL,IRF7,IRF9,JDP2,KDM5C,KLF10,KLF13,KLF15,KLF2,KLF7,KLF9,LPIN2,MAP2K1,MAP3K5,MAPK12,MAPK7,MBD1,MCF2L,MED15,Meis1,MEOX2,MLXIP,MXD4,MYC,MYD88,NAMP…	130
	Cellular Function and Maintenance	Function of blood cells	4.22e-09		-1.309	AHR,ATF3,BCL2L1,BHLHE40,Ccl2,CDKN1A,EFS,FCGR1A,FUT4,GADD45G,GATA2,GRN,HLA-E,HSH2D,IFIH1,IRF7,KLF10,KLF2,MAP2K1,MPZ,MYC,MYD88,NT5E,ORAI2,PER2,PIM1,PLAUR,PSMB10,PTGER4,PTGS2,RIGI,S1PR1,SLA,Slfn2,STAT2,STAT3,STAT4,STK4,TAPBP,TBK1,TCIRG1,TLR9,TOB1,TPCN2,Trim30a/Trim30d	45
	Cellular Function and Maintenance	Function of leukocytes	4.47e-09		-1.309	AHR,ATF3,BCL2L1,BHLHE40,Ccl2,EFS,FCGR1A,FUT4,GADD45G,GATA2,GRN,HLA-E,HSH2D,IFIH1,IRF7,KLF10,KLF2,MAP2K1,MPZ,MYC,MYD88,ORAI2,PIM1,PLAUR,PSMB10,PTGER4,PTGS2,RIGI,S1PR1,SLA,Slfn2,STAT2,STAT3,STAT4,STK4,TAPBP,TBK1,TCIRG1,TLR9,TOB1,TPCN2,Trim30a/Trim30d	42
	Nucleic Acid Metabolism,Small Molecule Biochemistry	Biosynthesis of purine ribonucleotide	1.03e-06		-1.286	AHR,BCL2L1,FAS,FOXO3,HK2,MAP2K1,MYC,NR4A1,NT5E,PML,PNPLA2,PPA1,RIPK1,SGMS1,SIRT5,SOCS3,STAT3,TRIB2	18
	Cardiovascular System Development and Function	Development of vasculature	9.36e-13		-1.266	ADAMTS1,ADIPOR2,ADRA1A,AHR,ANGPTL4,ANKRD17,ATF3,BMP4,Ccl2,CCN1,CDKN1A,CDKN1B,CFB,CREBBP,CSK,DGKE,EFNB1,EGR3,EPHA1,EPOR,ETV6,FAS,FBXO42,FFAR4,FGF7,FOXO3,FURIN,GATA2,GDNF,GLUL,GRN,HES1,HEY1,HHEX,HIF3A,HK2,HLX,HOXA5,IFI16,IL18BP,IL1RN,ISG15,ITGA5,KCNJ2,KLF10,KLF2,KLF7,LFNG,MAP2K1,MAPK7,MCF2L,Meis1,MEOX2,MYC,NQO2,NR4A1,NR4A2,NRARP,PDE3B,PER2,PFKFB3,PIK3C2B,PIM1,PLAUR,PML,PPP1R16B,PTCH1,PTGER4,PTGS2,P…	94
	Cardiovascular System Development and Function,Organismal Development,Tissue Development	Angiogenesis	9.36e-14		-1.265	ADAMTS1,ADIPOR2,AHR,ANGPTL4,ANKRD17,ATF3,BMP4,Ccl2,CCN1,CDKN1A,CDKN1B,CFB,CREBBP,CSK,DGKE,EFNB1,EGR3,EPHA1,EPOR,ETV6,FAS,FBXO42,FFAR4,FGF7,FOXO3,FURIN,GATA2,GDNF,GLUL,GRN,HES1,HEY1,HHEX,HIF3A,HK2,HLX,HOXA5,IFI16,IL18BP,IL1RN,ISG15,ITGA5,KCNJ2,KLF10,KLF2,KLF7,MAP2K1,MAPK7,MCF2L,Meis1,MEOX2,MYC,NQO2,NR4A1,NR4A2,NRARP,PDE3B,PFKFB3,PIK3C2B,PIM1,PLAUR,PML,PPP1R16B,PTCH1,PTGER4,PTGS2,PTPN1,PTX3,RAPGEF3…	90
	Cell Death and Survival,Hematological System Development and Function,Organismal Injury and Abnormalities	Cell viability of lymphocytes	9.83e-08		-1.236	BCL2L1,BMP4,CISH,EGR3,FAS,FCGR3A/FCGR3B,FOXO3,Foxp1,GATA3,HSH2D,KLF2,MAP2K1,MAPK7,MCF2L,MYC,MYD88,PARP14,PIM1,STAT3,STAT4,SYK,TLR9	22
	Cellular Movement,Hematological System Development and Function,Immune Cell Trafficking	Cellular infiltration by leukocytes	7.32e-08		-1.22	AHR,APOD,Ccl2,CCL4,CCN1,CDKN1A,CFB,DBNL,EFS,FAS,FGL2,FUT4,GATA2,IFI35,IFIH1,IL18BP,IL1RN,IRF7,KLF15,LIMK1,Ly6a (includes others),MAP3K5,Muc4,MYD88,NMI,NQO2,NR4A1,NT5E,PTGER4,PTGS2,PTPN1,PTX3,RGCC,RIPK1,SOCS3,SPHK1,ST14,STAT3,STING1,TBK1,TCIRG1,TIMP1,TLR9	43
	Embryonic Development,Hematological System Development and Function,Lymphoid Tissue Structure and Development,Organ Development,Organismal Development,Tissue Development	Formation of lymphoid tissue	1.18e-07		-1.174	AHR,BHLHE40,BMP4,CDKN1A,CDKN1B,DCK,EFNB1,EGR3,FAS,GATA2,GATA3,HES1,HK2,IL1RN,ISG15,LFNG,LGALS9B,MAP2K1,MYC,NQO2,PIM1,PTPN1,RARA,S1PR1,SEMA7A,SIX4,SOCS3,STK4,SYK,TAL1,THEMIS2,ZBTB1	32
	Cellular Growth and Proliferation,Hematological System Development and Function	Inhibition of leukocytes	1.71e-08		-1.172	AHR,EP300,FKBP5,GATA3,HHEX,HLA-E,ITGA5,KLF10,LGALS9B,PIM1,PTGER4,PTGS2,RAPGEF3,STAT3,TLR9	15
	Cellular Development,Cellular Growth and Proliferation,Hematological System Development and Function,Humoral Immune Response,Lymphoid Tissue Structure and Development	Proliferation of B lymphocytes	5.43e-07		-1.171	AHR,BCL2L1,CDKN1A,CDKN1B,CFB,CTPS1,EGR3,EP300,FAS,FCGR3A/FCGR3B,Foxp1,HSH2D,IL1RN,IRF2,ITGA5,KLF2,KLF9,LGALS9B,MYC,MYD88,PARP14,PIM1,PTGER4,S1PR1,SH2D3C,SYK,TCIRG1,TLR9	28
	Lymphoid Tissue Structure and Development,Tissue Morphology	Quantity of bone marrow cells	6.09e-07		-1.151	AHR,BCL2L1,CDKN1A,CREBBP,CSK,DAXX,FOSL2,GATA2,Ly6a (includes others),Meis1,MYC,MYD88,PIM1,PTX3,RASSF2,RIPK1,SLFN12L,SOCS3,TAL1,TIMP1	20
	Organismal Survival	Survival of organism	3.33e-11		-1.142	AGRN,ALDH5A1,APOD,ATF3,BCL2L1,Ccl2,CDKN1A,CDKN1B,CFB,DHX58,EPOR,FAS,FCGR1A,FCGR3A/FCGR3B,FEM1A,FGL2,FURIN,GATA2,GDNF,GLUL,GRN,HAP1,HCAR2,HK2,IFI16,IFIH1,IFITM3,IL1RN,IRF2,IRF7,ITGA5,LFNG,MAPK7,MEOX2,MYC,MYD88,NAMPT,NQO2,NR4A1,NR4A2,NT5E,OSMR,PER2,PHC2,PIM1,PML,PNP,PTGER4,PTGS2,PTPN1,PTX3,RARA,RIGI,RIPK1,Saa3,SAMHD1,SEMA7A,SIRT5,SNAI1,SOCS3,SPHK1,ST14,STAT2,STAT3,STAT4,STING1,SYK,TAL1,TIMP1,TLR9,T…	73
	Cell-To-Cell Signaling and Interaction,Cellular Movement,Hematological System Development and Function,Immune Cell Trafficking	Recruitment of leukocytes	1.23e-07		-1.118	AHR,BHLHE40,Ccl2,CCL4,CCN1,FAS,FCGR3A/FCGR3B,FOSL2,HCAR2,IFITM3,IL1RN,IRF7,LGALS9B,MAPK7,MPZ,Muc1,MYD88,PIK3R5,PTGS2,PTX3,RIGI,S1PR1,SLFN12L,SNAI1,ST14,STAT3,STING1,SYK,TIMP1,TLR9,TREML2,VCAN	32
	Gene Expression	Activation of DNA endogenous promoter	3.08e-13		-1.096	AGRN,AHR,ATF3,BHLHE40,BMP4,BNC1,CBX8,CCN1,CREBBP,DAXX,DDX21,EGR3,EP300,ETV6,FOSL2,FOXO3,Foxp1,GATA2,GATA3,GDNF,GLP1R,GMEB1,HELZ2,HES1,HEY1,HHEX,HIF3A,HOXA5,IFI16,IQCE,IRF2,IRF2BPL,IRF7,IRF9,JDP2,KLF10,KLF13,KLF15,KLF2,KLF7,KLF9,LPIN2,MAPK7,MBD1,MCF2L,Meis1,MEOX2,MLXIP,MYC,MYD88,NAMPT,NELFA,NOCT,NR4A1,NR4A2,NR5A2,NRARP,NUFIP1,OSR1,PARP9,PER2,PHRF1,PTCH1,RAPGEF3,RARA,RGCC,RIGI,RIPK1,RLF,S1PR1,SAFB,…	93
	Cell Cycle,Gene Expression	Binding of DNA	2.26e-12		-1.089	AHR,ATF3,Ccl2,CDKN1A,CISH,CREBBP,EGR3,EP300,EPOR,ERCC5,ETV6,FAS,FOSL2,FOXO3,Foxp1,GATA2,GATA3,HEY1,HIF3A,IER3,IFI16,IL1RN,IRF7,IRF9,ITGA5,KLF13,MAP2K1,MAPK12,MEOX2,MYC,NR4A1,NR4A2,NR5A2,OAS1,PLAUR,PML,PNPT1,PTPN1,RAPGEF3,RARA,RGCC,RIGI,RIPK1,S1PR1,SNAI1,SOCS3,STAT3,STAT4,STK4,TAL1,ZBP1	51
	Cellular Development,Connective Tissue Development and Function,Skeletal and Muscular System Development and Function,Tissue Development	Differentiation of osteoblasts	3.32e-07		-1.049	ADAR,AHR,BMP4,CCN1,EFNB1,EIF2AK2,FAS,FFAR4,FOSL2,GATA2,HEY1,IFI16,ITGA5,Ly6a (includes others),MAP2K1,MYC,NOCT,PTCH1,PTGER4,RASSF2,SMAD9,SNAI1,SOX11,TCIRG1,TOB1,ZHX3	26
	Nucleic Acid Metabolism,Small Molecule Biochemistry	Biosynthesis of nucleoside triphosphate	7.48e-08		-1.038	AHR,BCL2L1,CMPK2,CTPS1,FAS,FOXO3,HK2,MAP2K1,MYC,NR4A1,NT5E,PML,PNP,PNPLA2,RIPK1,SGMS1,SIRT5,SOCS3,STAT3,TRIB2	20
	Nucleic Acid Metabolism,Small Molecule Biochemistry	Metabolism of nucleoside triphosphate	2.34e-07		-1.038	AHR,BCL2L1,CMPK2,CTPS1,FAS,FOXO3,HK2,MAP2K1,MYC,NR4A1,NT5E,PML,PNP,PNPLA2,RIPK1,SAMHD1,SGMS1,SIRT5,SLC25A25,SOCS3,STAT3,TRIB2	22
	Embryonic Development,Hematological System Development and Function,Lymphoid Tissue Structure and Development,Organ Development,Organismal Development,Tissue Development	Formation of thymus gland	3.27e-07		-1.026	BMP4,CDKN1A,CDKN1B,DCK,EFNB1,EGR3,GATA2,GATA3,HES1,LFNG,MAP2K1,PIM1,RARA,SIX4,SOCS3,SYK,TAL1,THEMIS2,ZBTB1	19
	Cellular Development,Cellular Growth and Proliferation,Digestive System Development and Function,Hepatic System Development and Function,Organ Development,Tissue Development	Proliferation of hepatocytes	2.25e-07		-1	AHR,BMP4,CCN1,CDKN1A,CDKN1B,FAS,FBXO45,FGF7,IL1RN,KLF2,MAPK12,MYC,OSMR,RARA,SLC39A14,SOCS3,TIMP1,TNFRSF12A,TOB1	19
	Cell Death and Survival,Organismal Injury and Abnormalities	Cell death of phagocytes	3.56e-10		-0.979	AHR,ATF3,BCL2L1,BIRC2,CDKN1A,CDKN1B,DAXX,EIF2AK2,FAS,FOXO3,FUT4,HCAR2,IL1RN,IRF2,ISG15,MAP3K5,MYD88,NAMPT,NR4A1,PML,PTGER4,RIPK1,STAT3,STING1,STK4,SYK,TLR9,TRIM6-TRIM34,ZBP1	29
	Cellular Growth and Proliferation	Inhibition of lymphatic system cells	6.14e-07		-0.969	AHR,EP300,GATA3,HHEX,HLA-E,KLF10,LGALS9B,MKNK2,PIM1,PTGER4,PTGS2,TLR9	12
	Gene Expression	Transcription of DNA	6.16e-12		-0.958	AGRN,AHR,ATF3,BHLHE40,BMP4,BNC1,CBX8,CCN1,CDKN1B,CREBBP,DAXX,DDX21,DTX3L,EGR3,EP300,ETV6,FGF7,FOSL2,FOXO3,Foxp1,GATA2,GATA3,GDNF,GLP1R,GMEB1,HELZ2,HES1,HEY1,HHEX,HIF3A,HOXA5,IFI16,IQCE,IRF2,IRF2BPL,IRF7,IRF9,JDP2,KDM5C,KLF10,KLF13,KLF15,KLF2,KLF7,KLF9,LPIN2,MAP2K1,MAP3K5,MAPK7,MBD1,MCF2L,Meis1,MEOX2,MLXIP,MXD4,MYC,MYD88,NAMPT,NELFA,NOCT,NR4A1,NR4A2,NR5A2,NRARP,NUFIP1,OSR1,PARP9,PER2,PHRF1,PIM1,PM…	105
	Gene Expression	Transcription	1.62e-16		-0.94	ADIPOR2,AGRN,AHR,ATF3,BCL2L1,BHLHE40,BIRC2,BMP4,BNC1,CBX8,Ccl2,CCN1,CDKN1A,CDKN1B,CISH,CREBBP,Crnde,DAXX,DDX21,DTX3L,EGR3,EIF2AK2,ELL2,EP300,EPB41L4B,ERCC5,ETV6,FANCI,FAS,FCGR1A,FGF7,FHIT,FOSL2,FOXO3,Foxp1,GATA2,GATA3,GDNF,GLP1R,GMEB1,GRN,HELZ2,HES1,HEY1,HHEX,HIF3A,HOXA5,IFI16,IL1RN,IQCE,IRF2,IRF2BPL,IRF7,IRF9,JDP2,KDM5C,KLF10,KLF13,KLF15,KLF2,KLF7,KLF9,LGALS9B,LPIN2,MAP2K1,MAP3K5,MAPK12,MAPK7,MA…	149
	Organismal Injury and Abnormalities	Abdominal lesion	4.04e-16		-0.94	AASS,ABCA8,ABHD18,ABTB2,ADAMTS1,ADAMTS15,ADAMTSL2,ADAP2,ADAR,ADARB1,ADI1,ADIPOR2,ADRA1A,AEN,AFTPH,AGRN,AHR,AIFM2,ALDH5A1,ALPK1,ALPL,ANGPTL4,ANKFY1,ANKRD17,APOBEC3B,APOD,APOL6,APOLD1,APPL1,AREL1,ARFGAP2,ARL5B,ART3,ATF3,ATP13A1,ATP1A1,B4GALT4,BAIAP2,BAZ1A,BCAR3,BCL2L1,BCL7B,BHLHE40,BIRC2,BLOC1S5,BMP4,BNC1,BOP1,BYSL,C11orf68,C17orf58,C1orf116,CALHM6,CAMSAP3,CASS4,CBX8,CCDC25,CCDC6,CCDC86,Ccl2,CCL4,C…	480
	Digestive System Development and Function,Hepatic System Development and Function,Organ Development	Growth of liver	7.84e-07		-0.915	AHR,BMP4,CCN1,CDKN1A,CDKN1B,FAS,FBXO45,FGF7,IL1RN,KLF2,MAPK12,MYC,OSMR,PTGS2,RARA,SLC39A14,SOCS3,STAT3,TIMP1,TNFRSF12A,TOB1	21
	Protein Synthesis	Metabolism of protein	2.09e-07		-0.905	ADI1,AHR,Aph1c,AREL1,BCL2L1,Ccl2,CDKL2,CDKN1B,DTX3L,EIF2AK2,EIF4ENIF1,EIF4H,EIF6,EP300,FAM107A,FAS,FBXL4,FBXO45,FOXO3,FURIN,GDNF,GEMIN5,GRN,HERPUD1,IER3,IFIT1,IL1RN,ISG15,KLF15,KLF2,LARP1,MAP2K1,MKNK2,MMP11,MYC,MYD88,NHLRC1,NPLOC4,PARP12,PIM1,PLAUR,PLK2,RAPGEF3,RARA,RASSF2,RELN,RGS2,RIDA,RNF144B,RNF213,SF3B3,SOCS3,SPHK1,SPSB1,SRCIN1,ST14,STAT3,STING1,STK4,SYK,SYVN1,TBC1D10A,TCIRG1,TENT5B,TMPRSS2,…	70
	Dermatological Diseases and Conditions,Organismal Injury and Abnormalities	Skin lesion	9.36e-16		-0.898	AASS,ABCA8,ABTB2,ADAMTS1,ADAMTS15,ADAMTSL2,ADAP2,ADAR,ADARB1,ADI1,ADIPOR2,ADRA1A,AEN,AGRN,AHR,AIFM2,ALDH5A1,ALPK1,ALPL,ANGPTL4,ANKFY1,ANKRD17,ANKRD63,APOBEC3B,APOD,APOL6,APPL1,ARFGAP2,ART3,ATF3,ATP13A1,ATP1A1,BAIAP2,BAZ1A,BCAR3,BCL2L1,BNC1,BYSL,C11orf68,C1orf116,CALHM6,CAMSAP3,CASS4,CBX8,CCDC25,CCDC6,CCDC86,CDKL2,CDKN1A,CECR2,CFB,CGN,CHERP,CHMP4B,CHST8,CISH,CMPK2,CMTR1,CNKSR3,CREBBP,CSK,CSNK1D,CT…	380
	Cardiovascular System Development and Function	Maturation of vasculature	9.95e-07		-0.896	ANKRD17,ETV6,FOXO3,KLF2,MAPK7,S1PR1,SPHK1	7
	Cellular Development	Differentiation of tumor cell lines	3.34e-13		-0.88	ADRA1A,AHR,BCL2L1,BHLHE40,BMP4,CCN1,CDKN1A,CDKN1B,EP300,EPOR,ETV6,FOXO3,GADD45G,GATA2,GATA3,HES1,HOXA5,IFI16,IL1RN,ISG15,JDP2,LIMK1,MAP2K1,MAPK12,MBD1,Meis1,MYC,PLAUR,PML,PTGER4,PTGS2,PTPN1,RAPGEF3,RARA,RELN,RIGI,SOCS3,SOX11,SPHK1,STAT3,TAL1,TIMP1,VCAN,WNT7A	44
	Cell Death and Survival,Organismal Injury and Abnormalities	Cell death of antigen presenting cells	3.88e-08		-0.871	BCL2L1,BIRC2,CDKN1A,CDKN1B,DAXX,EIF2AK2,FAS,IRF2,ISG15,MAP3K5,MYD88,NAMPT,NR4A1,PML,PTGER4,RIPK1,STAT3,STING1,STK4,TLR9,TRIM6-TRIM34,ZBP1	22
	Cell Death and Survival,Organismal Injury and Abnormalities	Apoptosis of myeloma cell lines	2.8e-07		-0.852	ADIPOR2,BCL2L1,BMP4,CDKN1B,FAS,FOXO3,KLF10,KLF9,MAP2K1,MYC,NR4A1,PARP14,STAT3,STK4	14
	Cellular Function and Maintenance	Function of lymphatic system cells	7.53e-08		-0.808	AHR,ATF3,BCL2L1,BHLHE40,Ccl2,CDKN1B,EFS,GADD45G,GATA2,HLA-E,HSH2D,IRF7,KLF10,KLF2,MAP2K1,MPZ,MYC,MYD88,PSMB10,S1PR1,Slfn2,STAT3,STAT4,STK4,TAPBP,TBK1,TLR9,TOB1,Trim30a/Trim30d,TSC22D1	30
	Cellular Function and Maintenance,Hematological System Development and Function	Function of lymphocytes	2.5e-07		-0.808	AHR,ATF3,BCL2L1,BHLHE40,Ccl2,EFS,GADD45G,GATA2,HLA-E,HSH2D,IRF7,KLF10,KLF2,MAP2K1,MPZ,MYC,MYD88,PSMB10,S1PR1,Slfn2,STAT3,STAT4,STK4,TAPBP,TBK1,TLR9,TOB1,Trim30a/Trim30d	28
	Nucleic Acid Metabolism,Small Molecule Biochemistry	Synthesis of purine nucleotide	1.19e-06		-0.807	AHR,BCL2L1,FAS,FOXO3,HK2,MAP2K1,MYC,NAMPT,NR4A1,NT5E,OAS1,Oasl2,PML,PNP,PNPLA2,PPA1,RIPK1,SGMS1,SIRT5,SOCS3,STAT3,TRIB2	22
	Neurological Disease,Organismal Injury and Abnormalities	Seizures	5.58e-07		-0.767	AARS1,ADARB1,ALDH5A1,ALPL,ANGPTL4,ATF3,ATP1A1,BAIAP2,BHLHE40,Ccl2,CCN1,CDKN1A,DBNL,DGKE,EGR3,ELL2,EP300,FCGR1A,FCGR3A/FCGR3B,FGF7,GADD45G,GDNF,HES1,IL1RN,KCTD7,KLF10,MYC,MYD88,NAMPT,NHLRC1,NR4A1,PLAUR,PLK2,PTGS2,RAPGEF3,RELN,RGS2,SH3RF2,SLC25A22,SLC25A25,SLC39A14,SOCS3	42
	Cell Death and Survival,Organismal Injury and Abnormalities	Apoptosis of leukocyte cell lines	5.44e-08		-0.76	BCL2L1,Ccl2,CDKN1A,CDKN1B,DAXX,EIF2AK2,EPOR,FAS,FOXO3,HES1,IFIH1,ITGA5,MAP2K1,MYC,NR4A1,PIM1,PNPT1,STAT3,SYK,TRIB2	20
	Cellular Growth and Proliferation,Hematological System Development and Function	Inhibition of mononuclear leukocytes	7.89e-07		-0.754	AHR,EP300,GATA3,HHEX,HLA-E,ITGA5,KLF10,LGALS9B,PIM1,PTGER4,PTGS2,TLR9	12
	Cellular Development,Cellular Growth and Proliferation	Cell proliferation of carcinoma cell lines	3.6e-09		-0.749	ADAR,BCL2L1,BIRC2,BMP4,CCN1,CDKN1A,CDKN1B,DDX24,DHX58,EP300,EPHA1,EPOR,FAS,FBXO45,FGF7,FHIT,FOXO3,GDNF,GLUL,GRN,HK2,KIRREL1,KLF2,KLF9,LGALS3BP,MAP2K1,MAPK7,MYC,NAMPT,NR4A1,NR4A2,NT5E,OGFR,PARP10,PARP16,PDE3B,PFKFB3,PIK3C2B,PTGS2,PTPN1,RARA,RHOV,RIGI,SAFB,SERTAD2,SIRT5,SLFN12L,Slfn2,SLFN5,SNAI1,SOCS3,SPHK1,STAT3,STK4,SYVN1,TRIB2,USP10,VCAN,WNT7A	59
	Inflammatory Response,Organismal Injury and Abnormalities	Inflammation of organ	5.99e-16		-0.722	ADIPOR2,ADRA1A,AHR,ALDH5A1,ALPL,APPL1,ATF3,ATP1A1,BCL2L1,BHLHE40,BIRC2,Ccl2,CCL4,CCN1,CDKN1A,CFB,CISH,CSK,DPYSL2,DUSP14,EFS,EIF2AK2,EP300,EPOR,FAS,FBXL4,FCGR1A,FCGR3A/FCGR3B,FEM1A,FFAR4,FOXO3,GADD45G,GATA2,GATA3,GDNF,GLP1R,GRN,HCAR2,HLA-E,HOXA5,IFI16,IFI35,IFI44,IFIH1,IFIT1,IFIT3,IFITM3,IL18BP,IL1RN,IRF2,IRF7,IRF9,ISG15,ISG20,KDM5C,KSR1,LGALS9B,Ly6a (includes others),MAP2K1,MAP3K5,MLH3,Ms4a4c (in…	123
	Cell Death and Survival,Organismal Injury and Abnormalities	Cell death of macrophages	4.36e-08		-0.72	BCL2L1,BIRC2,CDKN1A,DAXX,EIF2AK2,FAS,IRF2,ISG15,MYD88,NAMPT,NR4A1,PML,RIPK1,STAT3,STING1,STK4,TLR9,TRIM6-TRIM34,ZBP1	19
	Gastrointestinal Disease,Inflammatory Disease,Inflammatory Response,Organismal Injury and Abnormalities	Experimental colitis	5.39e-07		-0.711	Ccl2,CFB,IFI16,IL1RN,Ly6a (includes others),Ms4a4c (includes others),MS4A6A,Muc4,MYD88,NT5E,S1PR1,Saa3,Slfn1,SOCS3,ST14,STAT3,STING1,TIMP1,TLR9,TNFRSF12A,ZBP1	21
	Cell-To-Cell Signaling and Interaction,Cellular Movement	Recruitment of myeloid cells	9.58e-07		-0.689	AHR,BHLHE40,Ccl2,CCL4,CCN1,FCGR3A/FCGR3B,FOSL2,HCAR2,IFITM3,IL1RN,IRF7,LGALS9B,MAPK7,MPZ,Muc1,MYD88,PIK3R5,PTGS2,PTX3,S1PR1,SLFN12L,SNAI1,ST14,STAT3,TLR9,TREML2,VCAN	27
	Connective Tissue Development and Function,Tissue Morphology	Quantity of connective tissue	1.59e-07		-0.686	ADAMTS1,AHR,ALPL,ANGPTL4,ATF3,BMP4,Ccl2,CDKN1A,CDKN1B,CREBBP,EIF6,EPOR,FFAR4,FOSL2,FOXO3,GATA2,GLP1R,GPAT4,HOXA5,IFIH1,IL1RN,KLF10,KLF13,KLF2,KSR1,Ly6a (includes others),MEOX2,MYC,NR4A1,NT5E,PER2,PIM1,PNPLA2,PTPN1,RAPGEF3,RASSF2,RIPK1,S1PR1,SDC3,SGMS1,SLC25A25,SOCS3,SPHK1,TCIM,TOB1,ZNF384	46
	Cellular Development	Differentiation of leukemia cell lines	6.31e-09		-0.681	BCL2L1,CDKN1B,EPOR,ETV6,FOXO3,GADD45G,GATA2,HOXA5,IL1RN,ISG15,MAP2K1,MAPK12,MYC,PTGS2,PTPN1,RARA,RELN,SOCS3,STAT3,TAL1,TIMP1	21
	Cellular Growth and Proliferation,Tissue Development	Proliferation of epithelial cells	7.6e-14		-0.68	AHR,ATF3,BCL2L1,BIRC2,BMP4,BNC1,CCN1,CDKN1A,CDKN1B,CREBBP,EP300,FAS,FBXO45,FGF7,Foxp1,GADD45G,GATA2,GATA3,GLUL,GRN,HES1,HEY1,HLX,HOXA5,IL1RN,KLF10,KLF2,KLF9,MAP2K1,MAP3K5,MAPK12,MAPK7,MYC,MYD88,NR4A1,OSMR,OSR1,PTCH1,PTGS2,PTPN1,RARA,RIDA,RNF144B,SIX4,SLC39A14,Slurp2,SNAI1,SOCS3,SOX11,SPHK1,STAT3,STING1,STK4,TIMP1,TNFRSF12A,TOB1,WNT7A,ZFP36L1	58
	Cell Death and Survival,Organismal Injury and Abnormalities	Cell death of myeloma cell lines	2.71e-07		-0.647	ADIPOR2,BCL2L1,BMP4,CDKN1B,FAS,FOXO3,KLF10,KLF9,MAP2K1,MYC,NR4A1,PARP14,RARA,STAT3,STK4	15
	Neurological Disease,Organismal Injury and Abnormalities	Motor dysfunction or movement disorder	2.61e-08		-0.619	ADRA1A,AGRN,AHR,ALDH5A1,APOD,BAIAP2,BCAR3,BCL2L1,BHLHE40,BIRC2,C19orf12,CCL4,CDKN1A,CDKN1B,CLK1,CYTH1,DBNL,DTX3L,DUSP14,EGR3,EIF2AK2,EP300,EVA1A,FAM107A,FAM3C,FAS,FBXL4,FBXO45,FCGR1A,FCGR3A/FCGR3B,FOXO3,Foxp1,GDNF,GEMIN5,GRN,HAP1,HERPUD1,HLA-E,IER3,IFI44,IFIH1,IFIT3,IRF2BPL,IRF7,ISG15,KCTD17,KCTD7,LGALS3BP,LIMK1,Ly6a (includes others),LY6E,MAP3K5,MEOX2,MPZ,MYC,MYD88,NHLRC1,NQO2,NR4A1,NR4A2,PARP12…	90
	Neurological Disease,Organismal Injury and Abnormalities	Intracranial lesion	5.63e-10		-0.599	AASS,ABCA8,ADAMTS1,ADAMTS15,ADAMTSL2,ADAR,ADRA1A,AFTPH,AGRN,AHR,ALDH5A1,ALPK1,ALPL,ANKFY1,ANKRD17,APPL1,AREL1,ARFGAP2,ARL5B,ART3,ATP1A1,B4GALT4,BAIAP2,BAZ1A,BCL2L1,BHLHE40,BNC1,C11orf68,C19orf12,CALHM6,CAMSAP3,CASS4,CBX8,CDC42EP4,CDKN1B,CECR2,CGN,CHERP,CHST8,CISH,CMPK2,CMTR1,CNKSR3,CREBBP,CSK,CSNK1D,CTDP1,CUL9,CYP39A1,DBNL,DCDC2B,DDX24,DDX27,DGKE,DHX58,DNAH6,DNASE1L2,DPY19L4,DTX3L,DUSP16,EFNB1,EG…	302
	Cell Death and Survival	Cell death of hematopoietic cell lines	2.66e-07		-0.555	BCL2L1,Ccl2,CDKN1A,CDKN1B,DAXX,EIF2AK2,EPOR,FAS,FOXO3,GATA2,HES1,IFIH1,IRF2,ITGA5,MAP2K1,MYC,NR4A1,PIM1,PNPT1,STAT3,SYK,TRIB2	22
	Cellular Development,Connective Tissue Development and Function,Tissue Development	Differentiation of bone cells	3.99e-09		-0.551	ADAR,AHR,BMP4,CCN1,EFNB1,EIF2AK2,FAS,FFAR4,FOSL2,GATA2,HEY1,IFI16,IRF9,ITGA5,JDP2,KLF10,Ly6a (includes others),LY6E,MAP2K1,MYC,MYD88,NAMPT,NOCT,PTCH1,PTGER4,PTGS2,RAPGEF3,RASSF2,SMAD9,SNAI1,SOCS3,SOX11,SYK,TAL1,TCIRG1,TLR9,TOB1,ZHX3	38
	Connective Tissue Development and Function,Tissue Development	Growth of connective tissue	2.98e-08		-0.549	ADAMTSL2,ADAR,AHR,ATF3,BCL2L1,BMP4,CCN1,CDKN1A,CDKN1B,CSK,EIF2AK2,EP300,FAS,FGF7,FOSL2,GATA2,GATA3,GRN,HOXA5,IFI16,ITGA5,KLF10,KLF9,KSR1,MAP2K1,MAP3K5,MAPK7,MCF2L,MYC,MYD88,PARP10,PER2,PFKFB3,PHC2,PLAUR,PLK2,PML,PTCH1,PTGS2,PTPN1,RNF144B,SAFB,Slfn1,Slfn2,Slurp2,SOCS3,SPHK1,STAT3,TCIRG1,TIMP1,TLR9,TNFRSF12A,VCAN,ZFP36L1	54
	Tissue Development	Accumulation of cells	7.33e-10		-0.542	AHR,BMP4,Ccl2,CCN1,CDKN1A,EGR3,FAS,FCGR3A/FCGR3B,FEM1A,FOXO3,GATA2,GATA3,GRN,IER3,IFI16,IL1RN,ITGA5,KLF2,MYC,MYD88,NR4A1,NT5E,OSMR,PIM1,PNPLA2,PTGS2,PTPN1,PTX3,RIPK1,S1PR1,SAMHD1,SEMA7A,SOCS3,STAT3,STK4,TIMP1,TLR9	37
	Cellular Development,Cellular Growth and Proliferation,Hematological System Development and Function,Hematopoiesis	Proliferation of hematopoietic progenitor cells	4.62e-08		-0.534	AGRN,BCL2L1,BMP4,CCL4,CDKN1A,CDKN1B,EFNB1,EGR3,EIF2AK2,EPOR,ETV6,FAS,FOXO3,GATA2,GATA3,HOXA5,KLF2,MCF2L,Meis1,MYC,PIM1,PTGS2,RARA,S1PR1,SOCS3,STAT3,SYK,TNFRSF12A	28
	Cell-mediated Immune Response,Cellular Development,Cellular Function and Maintenance,Cellular Growth and Proliferation,Embryonic Development,Hematological System Development and Function,Hematopoiesis,Lymphoid Tissue Structure and Development,Organ Development,Organismal Development,Tissue Development	Differentiation of T lymphocytes	7.73e-11		-0.525	AHR,BHLHE40,BMP4,CCN1,CDKN1B,CISH,DCK,EFNB1,EGR3,FAS,FGL2,FOXO3,Foxp1,GADD45G,GATA2,GATA3,HLX,IRF2,KLF10,LFNG,LGALS9B,MAP2K1,MYD88,NR4A1,NR4A2,NRARP,PNP,PTGER4,PTGS2,RGCC,RIGI,S1PR1,SLA,SOCS3,STAT2,STAT3,STAT4,SYK,TAL1,TCIRG1,USP18,ZBTB1,ZFP36L1	43
	Cellular Function and Maintenance,Hematological System Development and Function	Function of T lymphocytes	1.98e-07		-0.52	ATF3,BCL2L1,BHLHE40,Ccl2,EFS,GADD45G,HLA-E,HSH2D,IRF7,KLF10,KLF2,MAP2K1,MPZ,MYD88,PSMB10,S1PR1,Slfn2,STAT3,STAT4,STK4,TAPBP,TBK1,TLR9,TOB1,Trim30a/Trim30d	25
	Cell-To-Cell Signaling and Interaction,Cellular Movement,Hematological System Development and Function,Immune Cell Trafficking,Inflammatory Response	Recruitment of phagocytes	6.79e-07		-0.507	AHR,BHLHE40,Ccl2,CCL4,CCN1,FCGR3A/FCGR3B,FOSL2,HCAR2,IFITM3,IL1RN,LGALS9B,MAPK7,MPZ,Muc1,MYD88,PIK3R5,PTGS2,PTX3,S1PR1,SLFN12L,SNAI1,ST14,STAT3,TLR9,TREML2,VCAN	26
	Gene Expression	Expression of RNA	6.93e-18		-0.499	ADAR,ADIPOR2,AGRN,AHR,ATF3,BCL2L1,BHLHE40,BIRC2,BMP4,BNC1,CBX8,Ccl2,CCN1,CDKN1A,CDKN1B,CISH,CREBBP,Crnde,DAXX,DDX21,DHX58,DTX3L,EGR3,EIF2AK2,EIF4ENIF1,EIF4H,ELL2,EP300,EPB41L4B,ETV6,FANCI,FAS,FBXO45,FCGR1A,FGF7,FHIT,FOSL2,FOXO3,Foxp1,GATA2,GATA3,GDNF,GEMIN5,GLP1R,GMEB1,GRN,HELZ2,HES1,HEY1,HHEX,HIF3A,HOXA5,IFI16,IQCE,IRF2,IRF2BPL,IRF7,IRF9,ISG20,JDP2,KDM5C,KLF10,KLF13,KLF15,KLF2,KLF7,KLF9,LARP1,LG…	159
	Neurological Disease,Organismal Injury and Abnormalities	Movement Disorders	3.2e-08		-0.499	ADRA1A,AGRN,AHR,ALDH5A1,APOD,BAIAP2,BCAR3,BCL2L1,BHLHE40,BIRC2,C19orf12,CCL4,CDKN1A,CDKN1B,CLK1,CYTH1,DBNL,DTX3L,DUSP14,EGR3,EIF2AK2,EP300,EVA1A,FAM107A,FAM3C,FAS,FBXO45,FCGR1A,FCGR3A/FCGR3B,FOXO3,Foxp1,GDNF,GEMIN5,GRN,HAP1,HERPUD1,HLA-E,IER3,IFI44,IFIH1,IFIT3,IRF2BPL,IRF7,ISG15,KCTD17,KCTD7,LGALS3BP,LIMK1,Ly6a (includes others),LY6E,MAP3K5,MEOX2,MPZ,MYC,MYD88,NHLRC1,NQO2,NR4A1,NR4A2,PARP12,PARP9…	89
	Cellular Growth and Proliferation	Cytostasis	8.48e-07		-0.478	BHLHE40,BMP4,CCN1,CDKN1A,CDKN1B,DAXX,DENND2B,EIF2AK2,ETV6,FAS,FHIT,FOXO3,IFI16,IFIH1,IRF2,MAP2K1,MYC,PML,PTPN1,RARA,RIGI,SAFB,SOCS3,STAT3,TIMP1	25
	Embryonic Development,Organismal Development,Tissue Development	Development of abdomen	7.08e-07		-0.475	ADAMTS1,ADAR,AHR,Aph1c,ATF3,BCL2L1,BMP4,CDKN1A,CDKN1B,CREBBP,EP300,EPOR,FAS,FGF7,FOXO3,FURIN,GADD45G,GATA3,GDNF,GLP1R,GRN,HES1,HHEX,HLX,HOXA5,IL1RN,KCTD17,LFNG,LY6E,MAPK7,MYC,MYD88,NR4A1,NR5A2,OSR1,PDE3B,PTCH1,PTGER4,PTGS2,RARA,RNF31,SNAI1,SOCS3,TIMP1,TREX1,TSC22D1,WNT7A	47
	Cell Death and Survival,Organismal Injury and Abnormalities	Cell death of immune cells	5.25e-20		-0.446	ADAR,AHR,ATF3,BCL2L1,BIRC2,BMP4,CCDC86,Ccl2,CCL4,CDKN1A,CDKN1B,CISH,CUL9,DAXX,DCK,DHX58,EFNB1,EGR3,EIF2AK2,EP300,EPOR,FAS,FCGR1A,FCGR3A/FCGR3B,FGL2,FOXO3,Foxp1,FUT4,GADD45G,GATA3,GRN,HCAR2,HES1,HSH2D,IER3,IFIH1,IL1RN,IRF2,ISG15,ITGA5,KLF13,KLF2,MAP2K1,MAP3K5,MAPK7,MCF2L,Ms4a4c (includes others),MYC,MYD88,NAMPT,NQO2,NR4A1,PARP14,PIM1,PML,PNP,PNPT1,PTGER4,RIPK1,RNF31,S1PR1,Saa3,SPHK1,SRCIN1,ST14,ST…	76
	Cellular Growth and Proliferation,Connective Tissue Development and Function,Tissue Development	Proliferation of connective tissue cells	7.12e-09		-0.428	ADAMTSL2,ADAR,AHR,ATF3,BCL2L1,BMP4,CCN1,CDKN1A,CDKN1B,CSK,EIF2AK2,EP300,FAS,FGF7,FOSL2,GATA2,GATA3,GRN,HOXA5,IFI16,ITGA5,KLF10,KLF9,KSR1,MAP2K1,MAP3K5,MAPK7,MCF2L,MYC,MYD88,PARP10,PER2,PFKFB3,PHC2,PLAUR,PLK2,PML,PTCH1,PTGS2,PTPN1,RNF144B,SAFB,Slfn1,Slfn2,Slurp2,SOCS3,SPHK1,STAT3,TCIRG1,TIMP1,TNFRSF12A,VCAN,ZFP36L1	53
	Cellular Development,Cellular Growth and Proliferation,Hematological System Development and Function,Hematopoiesis,Tissue Development	Development of hematopoietic cells	9.38e-08		-0.419	ADAR,BAIAP2,BMP4,CCL4,CDKN1A,CDKN1B,CREBBP,DCK,EFNB1,EGR3,EIF2AK2,EIF6,EPOR,FAS,GATA2,GATA3,HES1,HOXA5,Ifi27l2a/Ifi27l2b,LFNG,MAP2K1,MKNK2,PIM1,Slfn2,SOCS3,STAT3,SYK,TAL1,THEMIS2	29
	Cellular Assembly and Organization	Development of cytoplasm	3.12e-07		-0.419	APPL1,BCL2L1,BMP4,BOP1,CAMSAP3,CDKN1A,CDKN1B,DBNL,DPYSL2,EPHA1,FAM107A,FGF7,FHIT,GDNF,GLUL,HAP1,KIRREL1,KLF2,KSR1,LIMK1,MAP2K1,MCF2L,MYC,NR4A1,OPA3,PEX11A,PIK3C2B,PLEKHG2,PNPT1,PTGER4,RAPGEF3,RELN,RGCC,RHPN2,S1PR1,SLA,SORBS3,SPHK1,STAT3,STING1,STK4,TBK1,TCIRG1	43
	Cell Death and Survival,Organismal Injury and Abnormalities	Apoptosis of phagocytes	6.51e-07		-0.413	AHR,ATF3,BCL2L1,BIRC2,CDKN1A,CDKN1B,EIF2AK2,FAS,FOXO3,HCAR2,IL1RN,IRF2,ISG15,MYD88,NAMPT,PTGER4,RIPK1,STAT3,SYK,TLR9,ZBP1	21
	Cell Death and Survival,Organismal Injury and Abnormalities	Cell death of myeloid cells	1.31e-11		-0.388	AHR,ATF3,BCL2L1,BIRC2,CDKN1A,DAXX,EIF2AK2,EPOR,FAS,FOXO3,FUT4,HCAR2,IL1RN,IRF2,ISG15,KLF2,Meis1,MYC,MYD88,NAMPT,NQO2,NR4A1,PIM1,PML,RIPK1,SRCIN1,STAT3,STING1,STK4,SYK,TLR9,TRIM6-TRIM34,ZBP1	33
	Hematological System Development and Function,Tissue Development	Accumulation of blood cells	7.53e-08		-0.379	AHR,BMP4,Ccl2,EGR3,FAS,FCGR3A/FCGR3B,FEM1A,FOXO3,GATA2,GRN,IER3,IL1RN,ITGA5,KLF2,MYC,MYD88,NR4A1,NT5E,OSMR,PIM1,PNPLA2,PTGS2,PTPN1,PTX3,S1PR1,SOCS3,STAT3,STK4,TIMP1,TLR9	30
	Cardiovascular System Development and Function,Organismal Development,Tissue Development	Vasculogenesis	4.58e-12		-0.374	ADAMTS1,ADIPOR2,AHR,ANGPTL4,ANKRD17,ATF3,BMP4,Ccl2,CCN1,CDKN1A,CDKN1B,CFB,CREBBP,EFNB1,EGR3,EPOR,ETV6,FAS,FGF7,FOXO3,FURIN,GDNF,GLUL,GRN,HES1,HEY1,HHEX,HIF3A,HK2,HLX,IFI16,IL18BP,IL1RN,ITGA5,KCNJ2,KLF10,KLF2,KLF7,MAP2K1,MAPK7,MCF2L,Meis1,MEOX2,MYC,NQO2,NR4A1,NR4A2,NRARP,PFKFB3,PIK3C2B,PIM1,PLAUR,PML,PPP1R16B,PTCH1,PTGS2,PTPN1,PTX3,RARA,RGCC,RGS2,RIPK1,S1PR1,SOCS3,SPHK1,STAT3,STING1,STK4,SYK,TAL1,…	75
	Hematological System Development and Function,Immune Cell Trafficking,Inflammatory Response,Tissue Development	Accumulation of macrophages	6.7e-07		-0.367	AHR,Ccl2,FAS,FEM1A,GRN,IL1RN,MYD88,NR4A1,NT5E,OSMR,PTX3,STAT3,TIMP1	13
	Cellular Development,Cellular Growth and Proliferation	Development of progenitor cells	2.3e-07		-0.364	ADAR,BAIAP2,BMP4,CDKN1A,CDKN1B,CREBBP,DCK,EFNB1,EGR3,EIF2AK2,EIF6,EPOR,FAS,GATA2,GATA3,HES1,HOXA5,Ifi27l2a/Ifi27l2b,LFNG,MAP2K1,MAPK7,MKNK2,PIM1,Slfn2,SOCS3,SYK,TAL1,THEMIS2,TNFRSF12A	29
	Cellular Development,Cellular Growth and Proliferation	Proliferation of progenitor cells	2.13e-08		-0.357	AGRN,BCL2L1,BMP4,CCL4,CDKN1A,CDKN1B,EFNB1,EGR3,EIF2AK2,EPOR,ETV6,FAS,FGF7,FOXO3,GATA2,GATA3,GDNF,HES1,HOXA5,ITGA5,KLF10,KLF2,MAPK7,MCF2L,Meis1,MYC,PIM1,PTGS2,RARA,S1PR1,SOCS3,STAT3,SYK,TNFRSF12A,WNT7A	35
	Infectious Diseases,Organismal Injury and Abnormalities	Replication of HIV-1	6.59e-07		-0.346	APOBEC3B,CCL4,CDKN1A,EIF2AK2,FGF7,IFITM3,IRF7,LY6E,MOV10,MYC,PML,PTGS2,SOCS3,STAT3,TLR9,ZC3HAV1	16
	Cell Death and Survival,Organismal Injury and Abnormalities	Apoptosis of B-lymphocyte derived cell lines	1.3e-06		-0.343	BCL2L1,CDKN1A,CDKN1B,DAXX,EPOR,FAS,FOXO3,HES1,ITGA5,MYC,PIM1,STAT3,SYK,TRIB2	14
	Embryonic Development,Organismal Development,Tissue Development	Development of body trunk	5.8e-10		-0.341	ADAMTS1,ADAR,ADRA1A,AGRN,AHR,ANKRD17,Aph1c,ATF3,BCL2L1,BIRC2,BMP4,CCN1,CDKN1A,CDKN1B,CISH,CREBBP,DBNL,DCK,EFNB1,EGR3,EP300,EPOR,FAS,FGF7,FLNC,FOXO3,Foxp1,FURIN,GADD45G,GATA2,GATA3,GDNF,GLP1R,GPAT4,GRN,HES1,HEY1,HHEX,HIF3A,HLX,HOXA5,IFI16,IL1RN,KCTD17,KLF10,KLF15,KLF2,KLF7,LFNG,LY6E,MAP2K1,MAPK7,MYC,MYD88,NR4A1,NR5A2,OAS2,OSR1,PDE3B,PDE9A,PIM1,PNPLA2,PTCH1,PTGER4,PTGS2,RAPGEF3,RARA,RGS2,RNF31,S1PR…	90
	Cell Death and Survival	Apoptosis of hematopoietic cell lines	5.42e-08		-0.326	BCL2L1,Ccl2,CDKN1A,CDKN1B,DAXX,EIF2AK2,EPOR,FAS,FOXO3,GATA2,HES1,IFIH1,ITGA5,MAP2K1,MYC,NR4A1,PIM1,PNPT1,STAT3,SYK,TRIB2	21
	Cell Death and Survival,Organismal Injury and Abnormalities	Apoptosis of fibrosarcoma cell lines	1.05e-06		-0.323	BCL2L1,BIRC2,CDKN1A,EIF2AK2,FAS,RIGI,RIPK1,RNF31,STAT2,TBK1	10
	Inflammatory Response,Organismal Injury and Abnormalities	Inflammation of body cavity	2.74e-11		-0.277	ADIPOR2,ADRA1A,AHR,ALDH5A1,ALPL,ATF3,BCL2L1,BIRC2,Ccl2,CCL4,CCN1,CDKN1A,CFB,CISH,CSK,EFS,EP300,EPOR,FAS,FBXL4,FCGR1A,FCGR3A/FCGR3B,FEM1A,FOXO3,GATA2,GDNF,GLP1R,GRN,HCAR2,HOXA5,IFI16,IFI44,IFIH1,IFIT3,IL18BP,IL1RN,IRF7,IRF9,ISG15,ISG20,KDM5C,KSR1,LGALS9B,Ly6a (includes others),MAP2K1,MAP3K5,Ms4a4c (includes others),MS4A6A,Muc4,MYD88,NAMPT,NMI,NQO2,NR5A2,NT5E,NUP98,PARP12,PDE3B,PEX11A,PIM1,PLAUR,PT…	88
	Gastrointestinal Disease,Organismal Injury and Abnormalities	Damage of digestive system	5.56e-07		-0.27	BCL2L1,Ccl2,CCL4,CDKN1A,CFB,EFS,FAS,FGF7,IFIH1,IL1RN,KLF2,MAPK12,Muc1,MYD88,NR5A2,NT5E,PTGER4,PTGS2,PTPN1,RIPK1,SPHK1,STAT3,STAT4,STING1,TLR9,TREX1	26
	Cellular Growth and Proliferation	Colony formation	6.65e-10		-0.25	AHR,APOBEC3B,ATF3,BCL2L1,BMP4,CCL4,CCN1,CDKN1A,CDKN1B,CREBBP,Crnde,DCK,EIF2AK2,EIF6,EPOR,FAS,FOXO3,GADD45G,GDNF,GPD1L,GRN,HCAR2,HES1,HOXA5,IFI16,IFIH1,IFITM3,IL1RN,ISG15,KLF2,LY6E,MAP2K1,MCF2L,Meis1,MKNK2,MLXIP,MYC,NR4A1,OSMR,PIM1,PLAUR,PML,PNPT1,PTCH1,PTGS2,PTPN1,RASSF2,RNF144B,SAFB,Slfn2,SLFN5,SPHK1,STAT2,STAT3,STING1,STK4,SYK,TAL1,VCAN,ZC3HAV1	60
	Hematological System Development and Function,Immune Cell Trafficking,Inflammatory Response,Tissue Development	Accumulation of leukocytes	4.9e-07		-0.228	AHR,BMP4,Ccl2,EGR3,FAS,FCGR3A/FCGR3B,FEM1A,FOXO3,GRN,IER3,IL1RN,ITGA5,KLF2,MYD88,NR4A1,NT5E,OSMR,PNPLA2,PTGS2,PTPN1,PTX3,S1PR1,SOCS3,STAT3,STK4,TIMP1,TLR9	27
	Cellular Development,Cellular Growth and Proliferation	Colony formation of cells	3.46e-11		-0.224	AHR,APOBEC3B,ATF3,BCL2L1,BMP4,CCL4,CCN1,CDKN1A,CDKN1B,CREBBP,Crnde,DCK,EIF2AK2,EIF6,EPOR,FAS,FOXO3,GADD45G,GDNF,GPD1L,GRN,HCAR2,HES1,HOXA5,IFI16,IFIH1,IFITM3,IL1RN,ISG15,KLF2,LY6E,MAP2K1,MCF2L,Meis1,MKNK2,MLXIP,MYC,NR4A1,OSMR,PML,PNPT1,PTCH1,PTGS2,PTPN1,RASSF2,RNF144B,SAFB,Slfn2,SLFN5,SPHK1,STAT2,STAT3,STK4,SYK,TAL1,VCAN	56
	Cell Death and Survival,Organismal Injury and Abnormalities	Cell death of blood cells	1.49e-20		-0.222	ADAR,AGRN,AHR,ATF3,BCL2L1,BIRC2,BMP4,CCDC86,Ccl2,CCL4,CDKN1A,CDKN1B,CISH,CREBBP,CUL9,DAXX,DCK,DHX58,EFNB1,EGR3,EIF2AK2,EP300,EPOR,FAS,FCGR1A,FCGR3A/FCGR3B,FGL2,FOXO3,Foxp1,FUT4,GADD45G,GATA2,GATA3,GRN,HCAR2,HES1,HSH2D,IER3,IFIH1,IL1RN,IRF2,ISG15,ITGA5,KLF13,KLF2,MAP2K1,MAP3K5,MAPK7,MCF2L,Meis1,Ms4a4c (includes others),MYC,MYD88,NAMPT,NQO2,NR4A1,PARP14,PIM1,PML,PNP,PNPT1,PTGER4,RIPK1,RNF31,S1PR1,S…	80
	Gastrointestinal Disease,Hepatic System Disease,Organismal Injury and Abnormalities	Liver lesion	9.73e-11		-0.21	AASS,ABCA8,ADAMTS1,ADAR,ADARB1,ADIPOR2,ADRA1A,AGRN,AHR,AIFM2,ALPK1,ALPL,ANKFY1,ANKRD17,AREL1,ATP13A1,ATP1A1,B4GALT4,BAZ1A,BCL2L1,BHLHE40,BIRC2,BMP4,BNC1,BOP1,C11orf68,C1orf116,CAMSAP3,CBX8,Ccl2,CCL4,CCN1,CDKN1A,CDKN1B,CECR2,CEP70,CFB,CGN,CHERP,CHST8,CISH,CLK1,CMTR1,CNKSR3,CREBBP,CTDP1,CTPS1,CUL9,CYP39A1,DAXX,DCK,DDX21,DDX24,DDX27,DGKE,DNAH6,DPY19L4,DTX3L,EFNB1,EFS,EIF2AK2,EIF6,ELL2,EP300,EPB41L4B…	274
	Infectious Diseases,Organismal Injury and Abnormalities	Infection by RNA virus	3.49e-14		-0.2	AASS,ADAR,ADRA1A,ALPL,APOBEC3B,APOD,ARL5B,ATP1A1,BAIAP2,BCL2L1,Bst2,CCL4,CDKN1A,CFB,CTDP1,DCP2,DHX58,DUSP16,EGR3,EIF2AK2,EP300,EPOR,ERCC5,FAS,FCGR1A,FCGR3A/FCGR3B,FGL2,FKBP5,FURIN,GLP1R,HES1,HLA-E,IFI35,IFI44,IFIH1,IFIT1,IFIT3,IFITM3,IL1RN,INTS6,IRF2,IRF7,ISG15,ISG20,KCNJ2,KLF2,LGALS3BP,LNX2,MED15,Muc4,MYD88,NAMPT,NMI,NR4A1,NR4A2,NT5E,NUP98,Oas1b,OAS2,OAS3,OSMR,PARP14,PARP9,PDE3B,PER2,PHF3,PIM1,P…	98
	Cellular Growth and Proliferation,Tissue Development	Generation of progenitor cells	4.28e-07		-0.184	ADAR,BAIAP2,BMP4,CDKN1A,CDKN1B,CREBBP,DCK,EFNB1,EGR3,EIF2AK2,EIF6,EPOR,FAS,GATA2,GATA3,HES1,HOXA5,Ifi27l2a/Ifi27l2b,LFNG,MAP2K1,MKNK2,PIM1,Slfn2,SOCS3,SYK,TAL1,THEMIS2,TNFRSF12A	28
	Cellular Development,Embryonic Development,Organismal Development	Differentiation of embryonic cells	1.28e-06		-0.17	ADAR,APPL1,BAIAP2,BCL2L1,BMP4,BYSL,CCL4,CDKN1A,CDKN1B,FGF7,GATA2,GDNF,HHEX,ITGA5,MAP2K1,MYC,NR4A2,OSR1,PIM1,PLAUR,SNAI1,SOCS3,SOX11,STAT3,STK40,ZFP64	26
	Cell Death and Survival,Gastrointestinal Disease,Hepatic System Disease,Organismal Injury and Abnormalities	Apoptosis of hepatocytes	1.75e-08		-0.164	ADAR,AHR,BCL2L1,BIRC2,CCL4,CDKN1A,DAXX,EPOR,FAS,MAP2K1,MYC,MYD88,PTGS2,PTPN1,RIPK1,SOCS3,STAT3,STK4,TLR9	19
	Neurological Disease,Organismal Injury and Abnormalities	Neurological signs	5.93e-07		-0.152	ADRA1A,APOD,BAIAP2,BCL2L1,BHLHE40,BIRC2,CCL4,CLK1,CYTH1,DCDC2,DTX3L,DUSP14,EIF2AK2,EPOR,EVA1A,FAM107A,FAM3C,FOXO3,Foxp1,GDNF,GPSM2,GRN,HAP1,HCAR2,HERPUD1,HLA-E,IER3,IFI44,IFIH1,IFIT3,IRF7,ISG15,KCTD17,KSR1,LGALS3BP,LIMK1,Ly6a (includes others),LY6E,MAP3K5,NQO2,NR4A1,PARP12,PARP9,PLK2,PPRC1,PSME1,PTGS2,QRICH1,RGS2,RIGI,RNF213,RTP4,S1PR1,SLC25A22,SMTN,Sp100,STAT2,USP18,VCAN,ZBP1,ZNF239	61
	Skeletal and Muscular System Development and Function	Development of appendicular skeleton	2.98e-07		-0.128	BMP4,CREBBP,GATA2,HOXA5,IFIH1,PHC2,PTGER4,PTGS2,SDC3,SNAI1,STAT3	11
	Connective Tissue Development and Function,Embryonic Development,Organ Development,Organismal Development,Skeletal and Muscular System Development and Function,Tissue Development	Formation of limb bone	3.21e-07		-0.128	BMP4,CREBBP,GATA2,HOXA5,IFIH1,PTGER4,PTGS2,SDC3,SNAI1,STAT3	10
	Tissue Development	Growth of epithelial tissue	4.49e-15		-0.124	ADAMTS1,AHR,ANGPTL4,ATF3,BCL2L1,BIRC2,BMP4,BNC1,Ccl2,CCN1,CDKN1A,CDKN1B,CREBBP,EGR3,EP300,EPOR,FAS,FBXO45,FGF7,FOXO3,Foxp1,GADD45G,GATA2,GATA3,GLUL,GRN,HES1,HEY1,HHEX,HLX,HOXA5,IL1RN,KCNJ2,KLF10,KLF2,KLF9,MAP2K1,MAP3K5,MAPK12,MAPK7,MYC,MYD88,NR4A1,NR4A2,NRARP,OSMR,OSR1,PFKFB3,PIM1,PLAUR,PML,PPP1R16B,PTCH1,PTGS2,PTPN1,RARA,RGCC,RIDA,RNF144B,SIX4,SLC39A14,Slurp2,SNAI1,SOCS3,SOX11,SPHK1,STAT3,STING1…	74
	Cellular Development,Connective Tissue Development and Function,Tissue Development	Differentiation of connective tissue cells	5.28e-16		-0.111	ADAR,AHR,ATF3,BMP4,CCL4,CCN1,CDKN1A,EFNB1,EIF2AK2,EP300,FAS,FFAR4,FOSL2,FOXO3,GATA2,GATA3,GDNF,GRN,HES1,HEY1,IFI16,IRF9,ITGA5,JDP2,KLF10,KLF15,LGALS3BP,Ly6a (includes others),LY6E,MAP2K1,MMP11,MYC,MYD88,NAMPT,NOCT,NR4A1,NR4A2,OPA3,OSBPL11,OSR1,PER2,PEX11A,PIM1,PLAUR,PTCH1,PTGER4,PTGS2,RAPGEF3,RARA,RASSF2,RGS2,SLC39A14,SMAD9,SNAI1,SOCS3,SOX11,STAT2,STAT3,STK4,SYK,TAL1,TCIRG1,TIMP1,TLR9,TMEM120A,TO…	70
	Cell Cycle	G1 phase	1.62e-08		-0.091	ADRA1A,AHR,ATF3,BCL2L1,BHLHE40,BOP1,CCN1,CDKN1A,CDKN1B,DAXX,DDX24,EIF2AK2,EP300,EPOR,ETV6,FOXO3,GADD45G,GATA3,HES1,HK2,IFI16,ITGA5,KLF10,MAP2K1,MAP3K5,MYC,NOCT,PARP14,PFKFB3,PIM1,PLK2,PNPT1,PTCH1,RASSF3,RGCC,Slfn1,SPHK1,STAT3,STING1,TAL1,TIMP1,TOB1	42
	Cell Death and Survival,Organismal Injury and Abnormalities	Apoptosis of fibroblast cell lines	1.13e-06		-0.073	AHR,ATF3,BCL2L1,BIRC2,CCN1,CDKN1A,CDKN1B,CUL9,DAXX,EIF2AK2,EIF6,FAS,FOXO3,GLP1R,IER3,IFI16,MAP3K5,MYC,PIM1,PLEKHF1,PML,PTPN1,RIPK1,RNF31,SPHK1,STK4,SYK,USP18	28
	Infectious Diseases,Organismal Injury and Abnormalities	Replication of Retroviridae	9.3e-07		-0.049	APOBEC3B,Bst2,CCL4,CDKN1A,EIF2AK2,FGF7,IFITM3,IRF7,LY6E,MOV10,MYC,PML,PTGS2,SOCS3,STAT3,TLR9,ZC3HAV1	17
	Cellular Development,Cellular Growth and Proliferation,Hematological System Development and Function,Hematopoiesis,Tissue Development	Differentiation of hematopoietic cells	7.77e-12		-0.033	ADAR,APOBEC3B,BAIAP2,BCL2L1,BMP4,Ccl2,CDKN1A,CDKN1B,DCK,EGR3,EIF2AK2,EIF6,EPOR,ETV6,FAS,Foxp1,GADD45G,GATA2,GATA3,HERC6,HES1,HEY1,HHEX,HOXA5,IFI16,Ifi27l2a/Ifi27l2b,LFNG,MAP2K1,Meis1,Muc4,MYC,MYCT1,PNP,PTGS2,PTPN1,RARA,STAT3,SYK,TAL1,TIMP1,TLR9,TNFRSF12A,TREX1,ZBTB1	44
	Digestive System Development and Function,Gastrointestinal Disease,Hepatic System Development and Function,Hepatic System Disease,Inflammatory Disease,Inflammatory Response,Organ Development,Organismal Injury and Abnormalities	Inflammation of liver	7.29e-07		-0.031	ADIPOR2,ALPL,BCL2L1,BIRC2,CCL4,CCN1,EFS,EPOR,FAS,FBXL4,FCGR1A,FCGR3A/FCGR3B,GLP1R,IFIT3,IL18BP,IL1RN,IRF7,ISG15,MAP3K5,MYD88,NAMPT,NUP98,PDE3B,PLAUR,RARA,RIGI,RIPK1,SOCS3,STAT3,STAT4,STING1,STK4,TIMP1	33
	Cell Death and Survival,Gastrointestinal Disease,Hepatic System Disease,Organismal Injury and Abnormalities	Cell death of hepatocytes	9.09e-10		-0.026	ADAR,AHR,BCL2L1,BIRC2,CCL4,CDKN1A,CDKN1B,DAXX,EPOR,FAS,FGL2,IL1RN,MAP2K1,MYC,MYD88,PTGS2,PTPN1,RIPK1,SOCS3,SPHK1,STAT3,STK4,TLR9	23
	Cellular Development,Cellular Growth and Proliferation,Hematological System Development and Function,Hematopoiesis,Tissue Development	Development of hematopoietic progenitor cells	5.68e-07		0.002	ADAR,BAIAP2,BMP4,CDKN1A,CDKN1B,CREBBP,DCK,EFNB1,EGR3,EIF2AK2,EIF6,EPOR,FAS,GATA2,GATA3,HES1,HOXA5,Ifi27l2a/Ifi27l2b,LFNG,MAP2K1,MKNK2,PIM1,Slfn2,SOCS3,SYK,TAL1,THEMIS2	27
	Cellular Development,Connective Tissue Development and Function,Tissue Development	Differentiation of adipocytes	2.66e-09		0.008	ATF3,BMP4,EP300,FFAR4,FOSL2,GATA2,GATA3,HES1,IFI16,JDP2,KLF15,MAP2K1,MMP11,MYC,NOCT,NR4A1,NR4A2,OPA3,OSBPL11,PER2,PEX11A,PIM1,PLAUR,PTGS2,RGS2,SNAI1,SOX11,STAT2,STK4,TIMP1,TMEM120A,TRIB2,ZFP36L1	33
	Immunological Disease,Organismal Injury and Abnormalities	Systemic autoimmune syndrome	1.46e-27		0.014	ADAR,ADARB1,ALDH5A1,ALPL,ATP1A1,BCL2L1,BMP4,CALHM6,Ccl2,CCL4,CDKN1B,CFB,CHST8,CISH,CMPK2,CSK,DAXX,DHX58,DTX3L,EFNB1,EGR3,EIF2AK2,ERCC5,FAS,FCGR1A,FCGR3A/FCGR3B,FGL2,FKBP5,FOXO3,FRY,FURIN,GADD45G,GATA3,GBP4,GLP1R,GLUL,Gm5431,GPD1L,GRN,HELZ2,HERC6,IFI16,Ifi27l2a/Ifi27l2b,IFI35,IFI44,IFIH1,IFIT1,IFIT3,IFITM3,IL18BP,IL1RN,IRF7,ISG15,ISG20,ITGA5,KLF13,LAP3,LGALS3BP,LIMK1,Ly6a (includes others),LY6E,MA…	133
	Infectious Diseases,Organismal Injury and Abnormalities	Replication of Influenza A virus	7.69e-09		0.028	ADAR,CDKN1B,CLK1,CMTR1,DTX2,EIF2AK2,HERPUD1,IFITM3,IRF2,ISG15,LARP1,LIMK1,MOV10,MYC,NMI,NUP98,OAS3,PARP12,PIK3R5,PML,PTX3,RBMS2,RIGI,SAFB,STING1,SUPT6H,TMPRSS2,TRIM14,UBA7,ZNFX1	30
	Cell Death and Survival	Cell death of lymphoid organ	2.62e-09		0.036	ADAR,AHR,ATF3,BCL2L1,BMP4,CDKN1A,CUL9,EFNB1,EGR3,FAS,IFIH1,KLF13,MCF2L,MYC,MYD88,NQO2,NR4A1,PML,PNP,RIPK1,SPHK1,ST14,STAT3	23
	Organismal Injury and Abnormalities	Benign lesion	3.53e-09		0.071	ABCA8,ADARB1,ADRA1A,AGRN,AHR,ALDH5A1,APOLD1,ATP1A1,BCL2L1,BIRC2,BMP4,BYSL,CCN1,CDKN1A,CDKN1B,CFB,CHST8,DAXX,DCK,DDX24,EP300,ERCC5,FAS,FGF7,FHIT,FLNC,FOXO3,GLUL,GPM6A,HAP1,HES1,HOXA5,IFIH1,IFIT1,IFIT3,IFITM3,KLF10,KLF2,KLF7,KSR1,LIMK1,LY6E,MAP2K1,MAP3K5,MAPK7,MMP11,MYC,MYD88,NR4A1,NR4A2,NR5A2,P2RX6,PLAUR,PML,PPA1,PTCH1,PTGER4,PTGS2,RAPGEF3,RARA,RELN,RHPN2,S1PR1,SAFB,SH2D3C,SLC39A14,SNAI1,SOCS3,SOX…	80
	Cardiovascular System Development and Function,Cellular Movement	Cell movement of endothelial cells	2.42e-10		0.085	ADAMTS1,ANGPTL4,BMP4,CCN1,CDKN1B,DGKE,EFNB1,EGR3,FOXO3,GATA2,GATA3,GLUL,GRN,HEY1,HHEX,HLX,KLF2,MAP2K1,MAPK12,MAPK7,MCF2L,MEOX2,MYC,NR4A1,NR4A2,OSR1,PDE3B,PIK3C2B,PIM1,PLAUR,PML,PTGS2,PTPN1,RAPGEF3,RGCC,S1PR1,STAT3,TARS1,TIMP1,TNFRSF12A,USP18,WNT7A	42
	Cellular Development,Tissue Development	Differentiation of bone marrow cells	3.88e-07		0.108	ADAR,BAIAP2,CDKN1A,CDKN1B,CREBBP,EFNB1,EIF2AK2,EIF6,ETV6,FAS,GATA2,GDNF,HES1,HOXA5,Ifi27l2a/Ifi27l2b,LFNG,Meis1,PML,RARA,SNAI1,SOX11,TAL1	22
	Cellular Development,Cellular Growth and Proliferation,Hematological System Development and Function,Hematopoiesis,Tissue Development	Differentiation of hematopoietic progenitor cells	1.48e-11		0.121	ADAR,APOBEC3B,BAIAP2,BCL2L1,BMP4,Ccl2,CDKN1A,CDKN1B,DCK,EGR3,EIF2AK2,EIF6,EPOR,ETV6,FAS,Foxp1,GADD45G,GATA2,GATA3,HERC6,HES1,HEY1,HHEX,HOXA5,IFI16,Ifi27l2a/Ifi27l2b,LFNG,MAP2K1,Meis1,Muc4,MYC,PNP,PTGS2,PTPN1,RARA,STAT3,SYK,TAL1,TIMP1,TLR9,TNFRSF12A,TREX1,ZBTB1	43
	Neurological Disease,Organismal Injury and Abnormalities	Neurogenic lesion	2.05e-10		0.121	AASS,ABCA8,ADAMTS1,ADAMTS15,ADAMTSL2,ADAR,ADRA1A,AFTPH,AGRN,AHR,ALDH5A1,ALPK1,ALPL,ANKFY1,ANKRD17,APOLD1,APPL1,AREL1,ARFGAP2,ARL5B,ART3,ATP1A1,B4GALT4,BAIAP2,BAZ1A,BCL2L1,BHLHE40,BNC1,C11orf68,C19orf12,CALHM6,CAMSAP3,CASS4,CBX8,CDC42EP4,CDKN1A,CDKN1B,CECR2,CGN,CHERP,CHST8,CISH,CMPK2,CMTR1,CNKSR3,CREBBP,CSK,CSNK1D,CTDP1,CUL9,CYP39A1,DBNL,DCDC2B,DDX24,DDX27,DGKE,DHX58,DNAH6,DNASE1L2,DPY19L4,DTX2,DT…	308
	Neurological Disease,Organismal Injury and Abnormalities	Brain lesion	1e-09		0.129	AASS,ABCA8,ADAMTS1,ADAMTS15,ADAMTSL2,ADAR,ADRA1A,AFTPH,AGRN,AHR,ALDH5A1,ALPK1,ALPL,ANKFY1,ANKRD17,APPL1,AREL1,ARFGAP2,ARL5B,ART3,ATP1A1,B4GALT4,BAIAP2,BAZ1A,BCL2L1,BHLHE40,BNC1,C11orf68,C19orf12,CALHM6,CAMSAP3,CASS4,CBX8,CDC42EP4,CDKN1B,CECR2,CGN,CHERP,CHST8,CISH,CMPK2,CMTR1,CNKSR3,CREBBP,CSK,CSNK1D,CTDP1,CUL9,CYP39A1,DBNL,DCDC2B,DDX24,DDX27,DGKE,DHX58,DNAH6,DNASE1L2,DPY19L4,DTX3L,DUSP16,EFNB1,EG…	303
	Cell Cycle	Interphase	1.48e-09		0.156	ADRA1A,AHR,ATF3,BCL2L1,BHLHE40,BMP4,BOP1,CCN1,CDKN1A,CDKN1B,CREBBP,Crnde,DAXX,DDX24,EIF2AK2,EP300,EPOR,ETV6,FAS,FHIT,FOXO3,GADD45G,GATA3,HES1,HK2,IER3,IFI16,ITGA5,KLF10,LIMK1,MAP2K1,MAP3K5,MAPK12,MAPK7,MEOX2,MXD4,MYC,NOCT,PARP14,PFKFB3,PIM1,PLAUR,PLK2,PML,PNPT1,PTCH1,PTGS2,RASSF3,RGCC,RNF31,SDC3,SLA,Slfn1,SNAI1,SPHK1,STAT3,STING1,TAL1,TIMP1,TOB1,TREX1	61
	Organismal Injury and Abnormalities	Soft tissue lesion	7.74e-11		0.176	AASS,ABCA8,ADAMTS1,ADAMTS15,ADAMTSL2,ADAR,ADRA1A,AFTPH,AGRN,AHR,ALDH5A1,ALPK1,ALPL,ANKFY1,ANKRD17,APOLD1,APPL1,AREL1,ARFGAP2,ARL5B,ART3,ATP1A1,B4GALT4,BAIAP2,BAZ1A,BCAR3,BCL2L1,BHLHE40,BNC1,C11orf68,C19orf12,CALHM6,CAMSAP3,CASS4,CBX8,CDC42EP4,CDKN1A,CDKN1B,CECR2,CGN,CHERP,CHST8,CISH,CMPK2,CMTR1,CNKSR3,CREBBP,CSK,CSNK1D,CTDP1,CUL9,CYP39A1,DAXX,DBNL,DCDC2B,DCK,DDX24,DDX27,DENND2B,DGKE,DHX58,DNAH6,D…	322
	Hematological System Development and Function,Hematopoiesis	Development of hematopoietic system	7.64e-08		0.181	ADAR,BAIAP2,BMP4,CCL4,CDKN1A,CDKN1B,CREBBP,DCK,EFNB1,EGR3,EIF2AK2,EIF6,EPOR,ETV6,FAS,GATA2,GATA3,HES1,HOXA5,Ifi27l2a/Ifi27l2b,IL1RN,LFNG,MAP2K1,Meis1,MKNK2,PIM1,PML,Slfn2,SOCS3,STAT3,SYK,TAL1,THEMIS2	33
	Endocrine System Disorders,Gastrointestinal Disease,Metabolic Disease,Organismal Injury and Abnormalities	Diabetes mellitus	5.46e-09		0.191	A930001A20Rik,ADAMTS1,ADIPOR2,ADRA1A,AGRN,ALPL,APOD,APPL1,ATF3,ATP1A1,BCL2L1,BHLHE40,BMP4,CALHM6,CCDC25,Ccl2,CCL4,CCN1,CDKN1A,CDKN1B,CFB,CISH,CREBBP,CSNK1D,EIF4ENIF1,EPOR,ETV6,FAS,FCGR1A,FCGR3A/FCGR3B,FKBP5,FOSL2,FOXO3,Foxp1,GBP4,GLP1R,GLUL,Gm5431,HCAR2,HERC6,HES1,HHEX,HK2,IFI16,Ifi27l2a/Ifi27l2b,IFI44,IFIH1,IFIT1,IFIT3,IFITM3,IL18BP,IL1RN,IRF7,KCNJ2,KLF10,KLF15,LGALS9B,LPIN2,Ly6a (includes other…	100
	Cellular Development	Differentiation of progenitor cells	1.16e-11		0.198	ADAR,APOBEC3B,BAIAP2,BCL2L1,BMP4,Ccl2,CDKN1A,CDKN1B,DCK,EGR3,EIF2AK2,EIF6,EPOR,ETV6,FAS,Foxp1,GADD45G,GATA2,GATA3,GDNF,HERC6,HES1,HEY1,HHEX,HOXA5,IFI16,Ifi27l2a/Ifi27l2b,LFNG,MAP2K1,MAP3K5,MAPK12,Meis1,Muc4,MYC,PNP,PTCH1,PTGS2,PTPN1,RARA,S1PR1,SOCS3,STAT3,STK4,SYK,TAL1,TIMP1,TLR9,TNFRSF12A,TPCN2,TREX1,ZBTB1,ZFP36L1	52
	Cell Death and Survival	Cell death of progenitor cells	1.13e-09		0.212	ADAR,AGRN,ATF3,BCL2L1,BMP4,CCL4,CDKN1A,CREBBP,CUL9,EFNB1,EGR3,EIF2AK2,EPOR,FAS,GATA2,GDNF,HES1,IFIH1,KLF13,KLF2,MCF2L,Meis1,MYC,NQO2,NR4A1,PNP,RIPK1,SOX11,SPHK1,ST14	30
	Cellular Development,Cellular Growth and Proliferation,Hematological System Development and Function,Hematopoiesis	Proliferation of erythroid precursor cells	2.21e-07		0.214	BCL2L1,BMP4,CDKN1A,CDKN1B,EPOR,FAS,HOXA5,MYC,SOCS3,TNFRSF12A	10
	Infectious Diseases,Organismal Injury and Abnormalities	Septic shock	9.99e-07		0.216	ADRA1A,AHR,ATF3,BCL2L1,CSK,FAS,FCGR1A,FCGR3A/FCGR3B,FOXO3,GATA3,IFI16,IL1RN,LY6E,MAP3K5,MAPK12,MYD88,PTGS2,SPHK1,STAT3,TRAFD1,Trim30a/Trim30d	21
	Cellular Development,Tissue Development	Differentiation of neural cells	5.58e-07		0.229	AGRN,BCL2L1,BMP4,Ccl2,CDKN1B,DPYSL2,EFNB1,EIF4ENIF1,FGF7,FOXO3,GADD45G,GATA2,GATA3,GDNF,GLUL,HES1,HEY1,KLF15,KLF9,LNX2,MAP2K1,MAP3K5,MBD1,Meis1,MPZ,MYC,MYD88,NR4A2,PTCH1,RAPGEF3,RARA,RELN,S1PR1,SNAI1,SOCS3,SOX11,STAT3,TIMP1,TLE6,TPCN2,VCAN,WNT7A	42
	Organismal Injury and Abnormalities,Respiratory Disease	Damage of lung	6.43e-09		0.231	ADRA1A,AHR,ATP1A1,Ccl2,CFB,CMPK2,FAS,FCGR1A,FCGR3A/FCGR3B,FGF7,FOSL2,FOXO3,HK2,HSH2D,LY6E,MAP3K5,MYD88,NAMPT,NT5E,PFKFB3,PLAUR,PTGER4,PTGS2,PTX3,S1PR1,SEMA7A,SOCS3,SPHK1,STAT3,STING1,TLR9	31
	Hematological Disease,Infectious Diseases,Organismal Injury and Abnormalities	Endotoxin shock response	1.16e-06		0.282	ATF3,CSK,FCGR1A,FCGR3A/FCGR3B,IFI16,IL1RN,MAP3K5,MYD88,PTGS2,SPHK1,STAT3,TRAFD1,Trim30a/Trim30d	13
	Cell Death and Survival,Organismal Injury and Abnormalities	Cell death of epithelial cell lines	4.63e-09		0.284	APOBEC3B,ATF3,BCL2L1,BIRC2,BMP4,CDKN1A,CDKN1B,DAXX,EIF2AK2,FAS,FOXO3,HK2,IER3,IFIH1,ITGA5,MAP3K5,MYC,NAMPT,OAS1,OAS2,OAS3,PIM1,PTCH1,PTGS2,RIPK1,RNF216,RNF31,SNAI1,SPHK1,STAT3,STK4,SYVN1,ZBP1	33
	Cell Death and Survival,Organismal Injury and Abnormalities	Necrosis	7.17e-16		0.287	AARS1,ADAMTS1,ADAR,ADARB1,ADI1,ADIPOR2,ADRA1A,AGRN,AHR,AIFM2,ANGPTL4,APOBEC3B,APPL1,ATF3,ATP1A1,BAZ1A,BCL2L1,BHLHE40,BIRC2,BMP4,CCDC6,CCDC86,Ccl2,CCL4,CCN1,CDKN1A,CDKN1B,CFB,CHMP4B,CISH,CREBBP,CSK,CTPS1,CUL9,DAXX,DCK,DDX21,DGKE,DHX58,EFNB1,EGR3,EIF2AK2,EIF6,EP300,EPOR,ETV6,EVA1C,FAS,FCGR1A,FCGR3A/FCGR3B,FFAR4,FGF7,FGL2,FHIT,FKBP5,FOXO3,Foxp1,FURIN,FUT4,GADD45G,GATA2,GATA3,GDNF,GLP1R,GPD1L,GPM6A,G…	191
	Cell Death and Survival,Organismal Injury and Abnormalities	Apoptosis of neurons	1.56e-07		0.292	AARS1,ADARB1,AGRN,ATF3,BCL2L1,Ccl2,CCL4,CDKN1A,CREBBP,EP300,EPOR,ETV6,FAS,FOXO3,GATA3,GDNF,GLP1R,GRN,HAP1,HERPUD1,HK2,KLF7,KSR1,MAP2K1,MAP3K5,MAPK12,MAPK7,NQO2,NR4A2,OSMR,PTCH1,PTGS2,RAPGEF3,RNF216,SIX4,SNRK,SOX11,SPHK1,TLR9	39
	Cellular Movement	Migration of vascular cells	3.68e-07		0.297	ADAMTS1,ATF3,BMP4,CCN1,CDKN1B,DGKE,EGR3,FOXO3,GATA3,GLUL,HHEX,HLX,KLF2,MEOX2,NAMPT,NR4A1,NR4A2,PIK3C2B,PLAUR,PML,PTGS2,PTPN1,S1PR1,STAT3,TIMP1,USP18	26
	Cell Death and Survival,Organismal Injury and Abnormalities	Cell death of breast cancer cell lines	1.31e-09		0.362	ADIPOR2,AHR,BCL2L1,BHLHE40,BIRC2,CCN1,CDKN1A,EIF2AK2,EP300,FAS,FGF7,FHIT,FOXO3,GPD1L,HCAR2,HK2,HOXA5,IER3,IFI16,KSR1,MAP2K1,MAP3K5,Muc4,Nradd,OAS3,PFKFB3,PIM1,PIWIL4,PLK2,PML,PTGS2,RIPK1,RNF31,SAMHD1,SNAI1,SPHK1,STAT3,TBK1,ZBP1	39
	Nucleic Acid Metabolism,Small Molecule Biochemistry	Metabolism of nucleotide	8.75e-08		0.37	AHR,BCL2L1,BMP4,CMPK2,CTPS1,DCK,FAS,FHIT,FOXO3,GLP1R,GPD1L,HCAR2,HK2,MAP2K1,MYC,NADK2,NAMPT,NMRK1,NOCT,NR4A1,NT5E,OAS1,Oasl2,PDE3B,PDE9A,PML,PNP,PNPLA2,PPA1,PTGER4,PTGS2,RGS2,RIPK1,SAMHD1,SGMS1,SIRT5,SLC25A25,SOCS3,STAT3,TRIB2	40
	Cell Death and Survival,Organismal Injury and Abnormalities	Apoptosis of fibroblasts	7.26e-10		0.377	AHR,ATF3,BCL2L1,BIRC2,BMP4,CDKN1A,CDKN1B,DAXX,EIF2AK2,EP300,FAS,FOXO3,KLF2,KSR1,MAP2K1,MAP3K5,MCF2L,MYC,NR4A1,PTPN1,RIGI,RIPK1,S1PR1,STAT3,STK4,SYVN1,TBK1,TIMP1	28
	Cell Death and Survival,Organismal Injury and Abnormalities	Cell death of hematopoietic progenitor cells	8.86e-09		0.377	ADAR,AGRN,ATF3,BCL2L1,BMP4,CCL4,CDKN1A,CREBBP,CUL9,EFNB1,EGR3,EIF2AK2,EPOR,FAS,GATA2,IFIH1,KLF13,KLF2,MCF2L,Meis1,MYC,NQO2,NR4A1,PNP,RIPK1,SPHK1,ST14	27
	Immunological Disease,Inflammatory Disease,Organismal Injury and Abnormalities	Immune mediated inflammatory disease	2.41e-25		0.383	ADAR,ADARB1,ADRA1A,AHR,ALDH5A1,ALPK1,ALPL,BCL2L1,BMP4,Bst2,Ccl2,CCL4,CDKN1A,CDKN1B,CFB,CHST8,CISH,CMPK2,CREBBP,CSK,DAXX,DCK,DHX58,DPYSL2,DTX3L,EFNB1,EGR3,EIF2AK2,EP300,ERCC5,FAS,FCGR1A,FCGR3A/FCGR3B,FGL2,FKBP5,FOXO3,FRY,FURIN,GADD45G,GATA2,GATA3,GLUL,GPD1L,GRN,HELZ2,HERC6,HES1,HLA-E,IFI16,IFI35,IFI44,IFIH1,IFIT1,IFIT3,IFITM3,IL18BP,IL1RN,IRF7,IRF9,ISG15,ISG20,ITGA5,KCNJ2,KLF13,LAP3,LGALS3BP,LIMK1…	138
	Nucleic Acid Metabolism	Metabolism of nucleic acid component or derivative	1e-07		0.387	AHR,BCL2L1,BMP4,CMPK2,CTPS1,DCK,DPYSL2,FAS,FHIT,FOXO3,GLP1R,GPAT4,GPD1L,HCAR2,HK2,MAP2K1,MYC,NADK2,NAMPT,NMRK1,NOCT,NR4A1,NT5E,OAS1,OAS2,OAS3,Oasl2,PDE3B,PDE9A,PML,PNP,PNPLA2,PPA1,PTGER4,PTGS2,RGS2,RIPK1,SAMHD1,SGMS1,SIRT5,SLC25A25,SOCS3,STAT3,TRIB2	44
	Cell Death and Survival,Organismal Injury and Abnormalities	Cell death of hematopoietic cells	4.97e-09		0.402	ADAR,AGRN,ATF3,BCL2L1,BMP4,CCL4,CDKN1A,CREBBP,CUL9,EFNB1,EGR3,EIF2AK2,EPOR,FAS,GATA2,IFIH1,KLF13,KLF2,MCF2L,Meis1,MYC,NQO2,NR4A1,PIM1,PNP,RIPK1,SPHK1,ST14	28
	Cell Death and Survival,Gastrointestinal Disease,Hepatic System Disease,Organismal Injury and Abnormalities	Apoptosis of liver cells	2.19e-09		0.405	ADAR,AHR,BCL2L1,BIRC2,CCL4,CDKN1A,DAXX,EPOR,FAS,IRF2,MAP2K1,MYC,MYD88,PTGS2,PTPN1,RIPK1,SOCS3,STAT3,STK4,TBK1,TIMP1,TLR9	22
	Cardiovascular System Development and Function,Cellular Movement	Migration of endothelial cells	1.74e-09		0.409	ADAMTS1,ANGPTL4,BMP4,CCN1,CDKN1B,DGKE,EGR3,FOXO3,GATA2,GATA3,GLUL,GRN,HEY1,HHEX,HLX,KLF2,MAP2K1,MAPK12,MAPK7,MCF2L,MEOX2,MYC,NR4A1,NR4A2,PIK3C2B,PIM1,PLAUR,PML,PTGS2,PTPN1,RGCC,S1PR1,STAT3,TARS1,TIMP1,TNFRSF12A,USP18,WNT7A	38
	Cell Death and Survival,Organismal Injury and Abnormalities	Necrosis of epithelial tissue	4.69e-14		0.431	ADAMTS1,ADAR,AHR,ANGPTL4,APOBEC3B,ATF3,BCL2L1,BIRC2,BMP4,CCL4,CDKN1A,CDKN1B,DAXX,DGKE,EIF2AK2,EPOR,FAS,FGF7,FGL2,FOXO3,GATA3,GRN,HK2,IER3,IFIH1,IL1RN,ITGA5,KLF10,KLF2,KSR1,MAP2K1,MAP3K5,MAPK7,MEOX2,Muc1,MYC,MYD88,NAMPT,NQO2,NR4A1,OAS1,OAS2,OAS3,PIM1,PLAUR,PSMB10,PTCH1,PTGS2,PTPN1,RIPK1,RNF216,RNF31,S1PR1,SEMA7A,SNAI1,SOCS3,SPHK1,STAT3,STING1,STK4,SYVN1,TBK1,TIMP1,TLR9,ZBP1	65
	Organismal Injury and Abnormalities,Respiratory Disease	Lung injury	1.43e-07		0.437	ADRA1A,AHR,ATP1A1,CFB,CMPK2,FCGR1A,FCGR3A/FCGR3B,FOSL2,FOXO3,HK2,HSH2D,LY6E,MAP3K5,MYD88,NAMPT,NT5E,PFKFB3,PLAUR,PTGER4,PTGS2,PTX3,S1PR1,SOCS3,SPHK1,STAT3,STING1,TLR9	27
	Connective Tissue Disorders,Organismal Injury and Abnormalities,Skeletal and Muscular Disorders	Non-traumatic arthropathy	1.2e-13		0.462	ADAMTS1,ADAMTS15,ADRA1A,ALPL,BHLHE40,BMP4,CCDC6,Ccl2,CCL4,CFB,CHST8,DAXX,EFNB1,EPOR,FAS,FCGR3A/FCGR3B,FGL2,FKBP5,FLNC,FOXO3,FRY,FURIN,GLP1R,GLUL,GRN,HELZ2,HES1,IL18BP,IL1RN,ITGA5,KLF13,LAP3,LRIG3,LY6E,MBD1,MMP11,Ms4a4c (includes others),MS4A6A,Ms4a6c,NAA25,NAMPT,NR4A1,NR4A2,NT5E,PDE3B,PLAUR,PTGER4,PTGS2,PTPN1,PTX3,RCSD1,RGCC,RNF144B,S1PR1,Saa3,SAFB,SDC3,Slfn1,SLFN12L,Slfn2,SLFN5,SMG7,SOCS3,SOX11,…	79
	Cell Death and Survival,Neurological Disease,Organismal Injury and Abnormalities	Cell death of cortical neurons	4.66e-07		0.466	BCL2L1,CDKN1A,CDKN1B,CREBBP,EP300,FAS,GDNF,GRN,HAP1,HK2,IL1RN,KSR1,MAP2K1,MAP3K5,MAPK7,PTGS2,RAPGEF3,RNF216,STK4,TLR9	20
	Cell Death and Survival,Neurological Disease,Organismal Injury and Abnormalities	Apoptosis of cerebral cortex cells	5.92e-07		0.47	ATF3,BCL2L1,CDKN1A,FAS,FOXO3,HAP1,HK2,KSR1,MAP2K1,MAP3K5,MAPK7,PTGS2,RAPGEF3,RNF216,TLR9	15
	Cell Death and Survival,Organismal Injury and Abnormalities	Cell death of leukemia cell lines	5.2e-08		0.477	AHR,BCL2L1,BIRC2,CDKN1A,CDKN1B,DAXX,EGR3,FAS,FKBP5,FOXO3,GADD45G,GATA2,HES1,INTS6,IRF9,LGALS3BP,MAP2K1,MYC,PEX11A,PIM1,PML,RGS3,RIPK1,RNF31,SGMS1,SOCS3,SPHK1,STAT3,STING1,STK4,TAL1,TRIB2,UBA7,USP18	34
	Cardiovascular Disease,Inflammatory Disease,Organismal Injury and Abnormalities	Vasculitis	7.29e-09		0.48	CFB,EP300,FCGR3A/FCGR3B,GATA3,IFI35,IFI44,IFIT1,IFIT3,IL1RN,ISG15,MYC,OASL,PARP9,SIGLEC1,STAT4,STING1,SYK,TLR9,TREX1	19
	Cell Death and Survival,Gastrointestinal Disease,Hepatic System Disease,Organismal Injury and Abnormalities	Cell death of liver cells	3.7e-13		0.503	ADAR,AHR,BCL2L1,BIRC2,CCL4,CDKN1A,CDKN1B,DAXX,EPOR,FAS,FGL2,FOXO3,HK2,IER3,IL1RN,IRF2,MAP2K1,MYC,MYD88,PTGS2,PTPN1,RIPK1,SOCS3,SPHK1,STAT3,STAT4,STK4,TBK1,TIMP1,TLR9,USP18	31
	Cardiovascular System Development and Function,Cellular Development,Cellular Function and Maintenance,Cellular Growth and Proliferation,Organismal Development,Tissue Development	Proliferation of endothelial cells	7.66e-07		0.519	ADAMTS1,ANGPTL4,BMP4,Ccl2,CDKN1A,CDKN1B,EGR3,EPOR,FGF7,FOXO3,GRN,HEY1,HHEX,IL1RN,KCNJ2,KLF2,MAP2K1,MYC,NR4A1,NR4A2,NRARP,PFKFB3,PIM1,PLAUR,PML,PPP1R16B,PTGS2,PTPN1,RGCC,STAT3,TNFRSF12A	31
	Cardiovascular System Development and Function,Cellular Movement	Movement of vascular endothelial cells	7.87e-08		0.545	ADAMTS1,BMP4,CCN1,CDKN1B,DGKE,EGR3,FOXO3,GATA3,GLUL,HHEX,HLX,KLF2,MEOX2,NR4A1,NR4A2,OSR1,PIK3C2B,PML,PTGS2,PTPN1,S1PR1,STAT3,TIMP1,USP18	24
	Cell Death and Survival,Organismal Injury and Abnormalities	Cell death of epithelial cells	1.41e-12		0.561	ADAR,AHR,APOBEC3B,ATF3,BCL2L1,BIRC2,BMP4,CCL4,CDKN1A,CDKN1B,DAXX,EIF2AK2,EPOR,FAS,FGF7,FGL2,FOXO3,GRN,HK2,IER3,IFIH1,IL1RN,ITGA5,KLF10,KSR1,MAP2K1,MAP3K5,Muc1,MYC,MYD88,NAMPT,NQO2,NR4A1,OAS1,OAS2,OAS3,PIM1,PLAUR,PTCH1,PTGS2,PTPN1,RIPK1,RNF216,RNF31,S1PR1,SEMA7A,SNAI1,SOCS3,SPHK1,STAT3,STK4,SYVN1,TBK1,TIMP1,TLR9,ZBP1	56
	Cell Death and Survival,Organismal Injury and Abnormalities	Apoptosis of thymocytes	7.29e-09		0.564	ADAR,ATF3,BCL2L1,BMP4,CDKN1A,CUL9,EFNB1,EGR3,FAS,IFIH1,KLF13,MCF2L,MYC,NQO2,NR4A1,PNP,RIPK1,SPHK1,ST14	19
	Cell Death and Survival,Gastrointestinal Disease,Hepatic System Disease,Organismal Injury and Abnormalities	Apoptosis of liver cell lines	1.34e-07		0.578	FAS,FOXO3,HK2,IER3,MYC,PTGS2,STAT3,STAT4,TIMP1	9
	Cell Death and Survival,Organismal Injury and Abnormalities	Apoptosis of myeloid cells	1.44e-08		0.585	AHR,ATF3,BCL2L1,BIRC2,CDKN1A,EIF2AK2,EPOR,FAS,FOXO3,HCAR2,IL1RN,IRF2,ISG15,KLF2,MYC,MYD88,NAMPT,NQO2,PIM1,RIPK1,SRCIN1,STAT3,SYK,TLR9,ZBP1	25
	Cell Death and Survival,Embryonic Development,Organismal Injury and Abnormalities	Cell death of embryonic cell lines	1.5e-07		0.601	ADIPOR2,AHR,AIFM2,APOBEC3B,ATF3,BCL2L1,BIRC2,CDKN1A,CDKN1B,CUL9,DAXX,EIF2AK2,FAS,FOXO3,HK2,IER3,IFI16,IFIH1,MAP3K5,MYC,NAMPT,NR4A2,PML,PTCH1,PTPN1,RIPK1,RNF216,RNF31,SPHK1,STAT3,STK4,SYVN1,TBK1,ZBP1	34
	Cell Death and Survival,Organismal Injury and Abnormalities	Cell death of fibroblasts	1.22e-08		0.646	AHR,ATF3,BCL2L1,BIRC2,BMP4,CDKN1A,CDKN1B,DAXX,EIF2AK2,EP300,FAS,FOXO3,KLF2,KSR1,MAP2K1,MAP3K5,MCF2L,MYC,NR4A1,PTPN1,RIGI,RIPK1,S1PR1,STAT3,STK4,SYVN1,TBK1,TIMP1,ZBP1	29
	Cell Death and Survival,Organismal Injury and Abnormalities	Apoptosis of epithelial cells	2.89e-09		0.651	ADAR,AHR,ATF3,BCL2L1,BIRC2,CCL4,CDKN1A,CDKN1B,DAXX,EPOR,FAS,GRN,KLF10,KSR1,MAP2K1,MAP3K5,Muc1,MYC,MYD88,NQO2,NR4A1,PLAUR,PTGS2,PTPN1,RIPK1,RNF31,S1PR1,SEMA7A,SOCS3,SPHK1,STAT3,STK4,TIMP1,TLR9	34
	Cell Death and Survival	Apoptosis of lymphoid organ	1.04e-09		0.657	ADAR,AHR,ATF3,BCL2L1,BMP4,CDKN1A,CUL9,EFNB1,EGR3,FAS,IFIH1,KLF13,MCF2L,MYC,MYD88,NQO2,NR4A1,PNP,RIPK1,SPHK1,ST14,STAT3	22
	Cell Death and Survival,Organismal Injury and Abnormalities	Cell death of fibroblast cell lines	1.52e-07		0.657	ADIPOR2,AHR,AIFM2,ATF3,BCL2L1,BIRC2,CCN1,CDKN1A,CDKN1B,CUL9,DAXX,EIF2AK2,EIF6,FAS,FOXO3,GLP1R,IER3,IFI16,IFIH1,IRF7,MAP2K1,MAP3K5,MYC,NR4A2,PIM1,PLEKHF1,PML,PTPN1,RIPK1,RNF31,SPHK1,STK4,SYK,TBK1,USP18,ZBP1	36
	Infectious Diseases,Organismal Injury and Abnormalities	Infection by coronavirus	3.86e-15		0.676	ADAR,ADRA1A,ALPL,APOD,ARL5B,ATP1A1,BAIAP2,CCL4,CDKN1A,CFB,EGR3,EIF2AK2,FCGR1A,FCGR3A/FCGR3B,FGL2,FKBP5,HLA-E,IFI44,IFIH1,IFIT1,IFIT3,IFITM3,IL1RN,IRF2,IRF7,ISG15,KCNJ2,LGALS3BP,Muc4,MYD88,NAMPT,NMI,NR4A1,NR4A2,NT5E,OAS2,OAS3,OSMR,PARP14,PARP9,PDE3B,PER2,PIM1,PTGER4,PTGS2,PTX3,RAPGEF3,RGS2,SIGLEC1,STING1,SYK,TIMP1,TLR9,TMPRSS2,VCAN,XAF1	56
	Cell Death and Survival	Apoptosis of progenitor cells	1.04e-09		0.68	ADAR,AGRN,ATF3,BCL2L1,BMP4,CCL4,CDKN1A,CREBBP,CUL9,EFNB1,EGR3,EIF2AK2,EPOR,FAS,GDNF,HES1,IFIH1,KLF13,KLF2,MCF2L,MYC,NQO2,NR4A1,PNP,RIPK1,SOX11,SPHK1,ST14	28
	Organismal Injury and Abnormalities	Non-malignant disorder	2.59e-10		0.682	ABCA8,ADARB1,ADRA1A,AGRN,AHR,ALDH5A1,APOBEC3B,APOLD1,ARL5B,ATP1A1,BCAR3,BCL2L1,BIRC2,BMP4,BYSL,Ccl2,CCL4,CCN1,CDKN1A,CDKN1B,CECR2,CFB,CHMP4B,CREBBP,CTDP1,DAXX,DCK,DDX24,EFNB1,ELL2,EP300,EPHA1,EPOR,ERCC5,FAS,FCGR1A,FCGR3A/FCGR3B,FGF7,FHIT,FLNC,FOSL2,FOXO3,FUT4,GATA3,GLP1R,GLUL,GPM6A,HAP1,HES1,HOXA5,IER3,IFIH1,IFIT1,IFIT3,IFITM3,IL1RN,IRF2,ISG20,ITGA5,KCNJ2,KLF10,KLF2,KLF7,KSR1,LFNG,LIMK1,LY6E,MAP2…	124
	Cardiovascular System Development and Function,Cellular Movement	Migration of vascular endothelial cells	4.83e-08		0.715	ADAMTS1,BMP4,CCN1,CDKN1B,DGKE,EGR3,FOXO3,GATA3,GLUL,HHEX,HLX,KLF2,MEOX2,NR4A1,NR4A2,PIK3C2B,PML,PTGS2,PTPN1,S1PR1,STAT3,TIMP1,USP18	23
	Dermatological Diseases and Conditions,Inflammatory Disease,Inflammatory Response,Organismal Injury and Abnormalities	Dermatitis	7.66e-09		0.73	AHR,ATP1A1,BCL2L1,CSK,DPYSL2,EIF2AK2,FAS,FCGR1A,FOXO3,GADD45G,GATA3,HLA-E,IFI44,IFIH1,IFIT1,IFIT3,IL1RN,IRF2,IRF9,ISG15,MLH3,MYC,MYD88,NR4A1,NR4A2,OAS1,OAS2,OASL,OSMR,PLAUR,PTGS2,RARA,RIPK1,RNF31,SGMS1,SOCS3,SPATS2L,SYK,TIMP1,TLR9,TREX1,TRIOBP,ZBP1,ZNF395	44
	Cell Death and Survival,Organismal Injury and Abnormalities	Apoptosis of leukemia cell lines	1.57e-08		0.738	AHR,BCL2L1,BIRC2,CDKN1A,CDKN1B,DAXX,EGR3,FAS,FKBP5,FOXO3,GADD45G,GATA2,HES1,INTS6,LGALS3BP,MAP2K1,MYC,PIM1,PML,RGS3,RIPK1,RNF31,SGMS1,SOCS3,SPHK1,STAT3,STK4,TAL1,TRIB2,UBA7,USP18	31
	Cell Death and Survival,Organismal Injury and Abnormalities	Apoptosis of connective tissue cells	1.07e-08		0.74	AHR,ATF3,BCL2L1,BIRC2,BMP4,CDKN1A,CDKN1B,DAXX,EIF2AK2,EP300,FAS,FCGR1A,FOXO3,KLF2,KSR1,MAP2K1,MAP3K5,MCF2L,MYC,NR4A1,PTPN1,RIGI,RIPK1,S1PR1,SPHK1,STAT3,STK4,SYVN1,TBK1,TIMP1,WNT7A	31
	Cell Death and Survival,Organismal Injury and Abnormalities	Cell death of lymphatic system cells	1.28e-13		0.75	ADAR,AHR,ATF3,BCL2L1,BMP4,CCDC86,Ccl2,CCL4,CDKN1A,CDKN1B,CUL9,DCK,DHX58,EFNB1,EGR3,EIF2AK2,EP300,FAS,FCGR3A/FCGR3B,FGL2,FOXO3,Foxp1,HSH2D,IER3,IFIH1,KLF13,KLF2,MAP2K1,MCF2L,Meis1,Ms4a4c (includes others),MYC,MYD88,NQO2,NR4A1,PARP14,PIM1,PML,PNP,RIPK1,RNF31,S1PR1,SPHK1,ST14,STAT3,STING1,SYVN1,TIMP1	48
	Cell Death and Survival,Organismal Injury and Abnormalities	Apoptosis of epithelial cell lines	9.84e-08		0.782	ATF3,BCL2L1,BIRC2,BMP4,CDKN1A,DAXX,EIF2AK2,FAS,FOXO3,HK2,IER3,ITGA5,MAP3K5,MYC,PIM1,PTCH1,PTGS2,RIPK1,RNF216,RNF31,SNAI1,SPHK1,STAT3,STK4,SYVN1	25
	Cellular Development,Embryonic Development,Organismal Development,Tissue Development	Differentiation of embryonic tissue	3.64e-10		0.783	ADAR,APPL1,BCL2L1,BMP4,BYSL,Ccl2,CCL4,CDKN1B,FOSL2,FOXO3,GADD45G,GATA2,GDNF,HES1,HHEX,ITGA5,MAP2K1,MAP3K5,MEOX2,NR4A2,OSR1,PLAUR,PTCH1,RARA,S1PR1,SNAI1,SOCS3,SOX11,SPHK1,STAT3,STK40,TAL1,WNT7A,ZFP64	34
	Tissue Morphology	Quantity of stem cells	2.9e-08		0.799	AHR,CDKN1A,CDKN1B,CREBBP,DAXX,FOXO3,GDNF,KLF2,Meis1,MYC,NR4A1,PER2,PML,RASSF2,RIPK1,SNAI1,STAT3,TCIM,TCIRG1,WNT7A,ZBTB1	21
	Inflammatory Disease,Organismal Injury and Abnormalities	Chronic inflammatory disorder	3.5e-10		0.801	ADRA1A,AHR,ALPL,BCL2L1,BMP4,Ccl2,CCL4,CDKL2,CDKN1A,CFB,CHST8,DAXX,EFNB1,EP300,EPOR,FAS,FCGR1A,FCGR3A/FCGR3B,FGL2,FKBP5,FOSL2,FOXO3,FRY,FURIN,GATA2,GLUL,GRN,HCAR2,HELZ2,IFI16,IL18BP,IL1RN,ITGA5,KDM5C,KLF13,KSR1,LAP3,LFNG,LPIN2,LY6E,MBD1,Ms4a4c (includes others),MS4A6A,Ms4a6c,MYD88,NAA25,NAMPT,NR4A1,NR4A2,NR5A2,PDE3B,PLAUR,PTGER4,PTGS2,PTPN1,RCSD1,RGCC,RIPK1,S1PR1,Saa3,SAFB,SDC3,Slfn1,SLFN12L,Slfn2…	86
	Cell Death and Survival,Organismal Injury and Abnormalities	Apoptosis of breast cancer cell lines	2.1e-08		0.803	ADIPOR2,AHR,BCL2L1,BHLHE40,BIRC2,CCN1,CDKN1A,EIF2AK2,EP300,FAS,FHIT,FOXO3,GPD1L,HCAR2,HK2,HOXA5,IER3,IFI16,KSR1,MAP2K1,MAP3K5,Muc4,OAS3,PIM1,PIWIL4,PLK2,PTGS2,RNF31,SAMHD1,SNAI1,SPHK1,STAT3,TBK1	33
	Cell Death and Survival	Apoptosis of thymus gland	1.63e-09		0.82	ADAR,AHR,ATF3,BCL2L1,BMP4,CDKN1A,CUL9,EFNB1,EGR3,FAS,IFIH1,KLF13,MCF2L,MYC,NQO2,NR4A1,PNP,RIPK1,SPHK1,ST14	20
	Hematological Disease,Infectious Diseases,Organismal Injury and Abnormalities	Endotoxemia	2.45e-07		0.847	ADRA1A,ATF3,CSK,FCGR1A,FCGR3A/FCGR3B,IFI16,IL1RN,MAP3K5,MYD88,PDE3B,PTGS2,SPHK1,STAT3,STAT4,TRAFD1,Trim30a/Trim30d	16
	Cell Death and Survival,Organismal Injury and Abnormalities	Apoptosis of hematopoietic progenitor cells	1.44e-08		0.886	ADAR,AGRN,ATF3,BCL2L1,BMP4,CCL4,CDKN1A,CREBBP,CUL9,EFNB1,EGR3,EIF2AK2,EPOR,FAS,IFIH1,KLF13,KLF2,MCF2L,MYC,NQO2,NR4A1,PNP,RIPK1,SPHK1,ST14	25
	Cell Death and Survival,Organismal Injury and Abnormalities	Apoptosis of hematopoietic cells	8.1e-09		0.888	ADAR,AGRN,ATF3,BCL2L1,BMP4,CCL4,CDKN1A,CREBBP,CUL9,EFNB1,EGR3,EIF2AK2,EPOR,FAS,IFIH1,KLF13,KLF2,MCF2L,MYC,NQO2,NR4A1,PIM1,PNP,RIPK1,SPHK1,ST14	26
	Cell Death and Survival,Gastrointestinal Disease,Hepatic System Disease,Organismal Injury and Abnormalities	Cell death of liver cell lines	5.14e-08		0.911	BCL2L1,FAS,FOXO3,HK2,IER3,MYC,PTGS2,STAT3,STAT4,TIMP1	10
	Cell Death and Survival,Neurological Disease,Organismal Injury and Abnormalities	Apoptosis of brain cells	1e-06		0.914	ATF3,BCL2L1,CDKN1A,CREBBP,EP300,FAS,FOXO3,HAP1,HK2,KSR1,MAP2K1,MAP3K5,MAPK7,PTGS2,RAPGEF3,RNF216,TLR9	17
	Cellular Development,Cellular Growth and Proliferation,Hematological System Development and Function,Hematopoiesis,Tissue Development	Differentiation of erythroid precursor cells	3.48e-07		0.938	ADAR,BCL2L1,BMP4,EIF2AK2,EPOR,ETV6,FAS,GATA2,HEY1,HOXA5,MYC,PTPN1,TIMP1,TNFRSF12A	14
	Cellular Development,Cellular Growth and Proliferation,Hematological System Development and Function,Hematopoiesis,Tissue Development	Differentiation of erythroid cells	7.61e-07		0.951	BCL2L1,BMP4,EPOR,ETV6,GATA2,HEY1,HOXA5,MYC,PTPN1,TNFRSF12A	10
	Cell Death and Survival,Organismal Injury and Abnormalities	Cell death of mononuclear leukocytes	1.22e-12		0.965	ADAR,AHR,ATF3,BCL2L1,BMP4,CCDC86,Ccl2,CCL4,CDKN1A,CDKN1B,CUL9,DCK,DHX58,EFNB1,EGR3,EIF2AK2,EP300,FAS,FCGR3A/FCGR3B,FGL2,FOXO3,Foxp1,GADD45G,HSH2D,IER3,IFIH1,KLF13,KLF2,MAP2K1,MCF2L,Ms4a4c (includes others),MYC,NQO2,NR4A1,PARP14,PNP,RIPK1,RNF31,S1PR1,SPHK1,ST14,STAT3,STING1,SYVN1,TIMP1	45
	Infectious Diseases,Organismal Injury and Abnormalities	Systemic inflammatory response syndrome and/or sepsis	6.58e-14		1.014	ADRA1A,ALPL,ATF3,BAIAP2,BCL2L1,Bst2,CSK,EFNB1,ETV6,FAS,FCGR1A,FCGR3A/FCGR3B,HCAR2,IFI16,IFI35,IFIH1,IFIT3,IFITM3,IL18BP,IL1RN,IRF7,ISG15,KCNJ2,MAP3K5,MYC,MYD88,NAMPT,NMI,OASL,PDE3B,PML,PTGS2,PTPN1,RIGI,RIPK1,SMTN,SOCS3,SPHK1,STAT3,STAT4,TBK1,TOR1AIP2,TRAFD1,Trim30a/Trim30d,XAF1	45
	Cardiovascular System Development and Function,Cellular Development,Cellular Function and Maintenance,Cellular Growth and Proliferation,Organismal Development,Tissue Development	Endothelial cell development	8.16e-08		1.035	ADAMTS1,ANGPTL4,BMP4,Ccl2,CCN1,CDKN1A,CDKN1B,EGR3,EPOR,FGF7,FOXO3,GRN,HEY1,HHEX,IL1RN,KCNJ2,KLF2,MAP2K1,MAPK7,MEOX2,MYC,NR4A1,NR4A2,NRARP,PFKFB3,PIK3C2B,PIM1,PLAUR,PML,PPP1R16B,PTGS2,PTPN1,RGCC,STAT3,TAL1,TNFRSF12A	36
	Cell Death and Survival,Organismal Injury and Abnormalities	Apoptosis of T lymphocytes	7.49e-12		1.046	ADAR,AHR,ATF3,BCL2L1,BMP4,CCDC86,Ccl2,CCL4,CDKN1A,CDKN1B,CUL9,DCK,DHX58,EFNB1,EGR3,EP300,FAS,FOXO3,Foxp1,IER3,IFIH1,KLF13,KLF2,MAP2K1,MCF2L,Ms4a4c (includes others),MYC,NQO2,NR4A1,PNP,RIPK1,SPHK1,ST14,STAT3,STING1	35
	Cell Death and Survival,Organismal Injury and Abnormalities	Cell death of lymphocytes	1.3e-12		1.099	ADAR,AHR,ATF3,BCL2L1,BMP4,CCDC86,Ccl2,CCL4,CDKN1A,CDKN1B,CUL9,DCK,DHX58,EFNB1,EGR3,EIF2AK2,EP300,FAS,FCGR3A/FCGR3B,FGL2,FOXO3,Foxp1,HSH2D,IER3,IFIH1,KLF13,KLF2,MAP2K1,MCF2L,Ms4a4c (includes others),MYC,NQO2,NR4A1,PARP14,PNP,RIPK1,RNF31,S1PR1,SPHK1,ST14,STAT3,STING1,SYVN1,TIMP1	44
	Cell Death and Survival,Gastrointestinal Disease,Hepatic System Disease,Organismal Injury and Abnormalities	Necrosis of liver	3.81e-12		1.116	ADAR,AHR,BCL2L1,BIRC2,CCL4,CDKN1A,CDKN1B,DAXX,EPOR,FAS,FGL2,FOXO3,HK2,IER3,IL1RN,IRF2,MAP2K1,MYC,MYD88,NAMPT,PTGS2,PTPN1,RIPK1,SOCS3,SPHK1,STAT3,STAT4,STK4,TBK1,TIMP1,TLR9,TREX1,USP18	33
	Hematological System Development and Function,Tissue Morphology	Quantity of granulocytes	4.97e-08		1.116	AHR,Ccl2,CDKN1A,CISH,CREBBP,DAXX,FAS,FOSL2,FUT4,GATA3,GRN,IL18BP,LGALS9B,Ly6a (includes others),MYC,MYD88,NQO2,PIK3R5,PML,PTGS2,RIGI,RIPK1,RNF31,SLFN12L,SOCS3,SRCIN1,STAT3,STAT4,STING1,STK4,TCIM,TCIRG1,TIMP1,TREX1	34
	Cell Death and Survival,Organismal Injury and Abnormalities	Cell death of tumor cell lines	3.97e-12		1.158	ADAR,ADI1,ADIPOR2,AHR,AIFM2,ANGPTL4,APPL1,ATF3,ATP1A1,BAZ1A,BCL2L1,BHLHE40,BIRC2,BMP4,CCDC6,CCN1,CDKN1A,CDKN1B,CREBBP,CTPS1,CUL9,DAXX,DCK,DDX21,EGR3,EIF2AK2,EP300,EPOR,EVA1C,FAS,FFAR4,FGF7,FHIT,FKBP5,FOXO3,GADD45G,GATA2,GDNF,GLP1R,GPD1L,GPM6A,GRN,HAP1,HCAR2,HERPUD1,HES1,HK2,HOXA5,HSH2D,IER3,IFI16,IFIH1,IL1RN,INTS6,IRF2,IRF9,ITGA5,KLF10,KLF2,KLF9,KSR1,LGALS3BP,MAP2K1,MAP3K5,MAPK12,MAPK7,MBD1,Muc4,…	125
	Cell Death and Survival,Organismal Injury and Abnormalities	Cell death of connective tissue cells	1.18e-08		1.169	ADIPOR2,AHR,AIFM2,ATF3,BCL2L1,BIRC2,BMP4,CCN1,CDKN1A,CDKN1B,CUL9,DAXX,EIF2AK2,EIF6,EP300,FAS,FCGR1A,FOXO3,GLP1R,IER3,IFI16,IFIH1,IRF7,KLF2,KSR1,MAP2K1,MAP3K5,MCF2L,MYC,NR4A1,NR4A2,PIM1,PLEKHF1,PML,PTPN1,RIGI,RIPK1,RNF31,S1PR1,SPHK1,STAT3,STK4,SYK,SYVN1,TBK1,TIMP1,USP18,WNT7A,ZBP1	49
	Connective Tissue Disorders,Organismal Injury and Abnormalities	Abnormality of adipose tissue	9.3e-07		1.193	ADIPOR2,APPL1,Ccl2,EIF6,FAS,FFAR4,JDP2,Ly6a (includes others),OSMR,PDE3B,PNPLA2,PTGER4,PTGS2,PTPN1,RIPK1,SMTN,STAT3	17
	Metabolic Disease,Organismal Injury and Abnormalities	Glucose metabolism disorder	1.37e-10		1.206	A930001A20Rik,ADAMTS1,ADARB1,ADIPOR2,ADRA1A,AGRN,ALPL,ANGPTL4,APOD,APPL1,ATF3,ATP1A1,BCL2L1,BHLHE40,BMP4,CALHM6,CCDC25,Ccl2,CCL4,CCN1,CDKN1A,CDKN1B,CFB,CISH,CREBBP,CSNK1D,EIF2AK2,EIF4ENIF1,EP300,EPOR,ESYT3,ETV6,FAS,FCGR1A,FCGR3A/FCGR3B,FFAR4,FKBP5,FOSL2,FOXO3,Foxp1,GATA2,GBP4,GLP1R,GLUL,Gm5431,GRN,HCAR2,HERC6,HES1,HHEX,HK2,IFI16,Ifi27l2a/Ifi27l2b,IFI44,IFIH1,IFIT1,IFIT3,IFITM3,IL18BP,IL1RN,IRF7,K…	118
	Hematological System Development and Function,Tissue Morphology	Quantity of myeloid cells	6.05e-10		1.212	AHR,ATF3,BCL2L1,BMP4,Ccl2,CDKN1A,CDKN1B,CISH,CREBBP,CSK,DAXX,DCK,EIF2AK2,EPOR,FAS,FGF7,FOSL2,FOXO3,FUT4,GATA2,GATA3,GRN,HOXA5,IL18BP,KLF13,KLF2,LGALS9B,Ly6a (includes others),Meis1,MPZ,MYC,MYD88,NQO2,NR4A1,NT5E,PIK3R5,PIM1,PML,PNPLA2,PTGS2,PTX3,RASSF2,RIGI,RIPK1,RNF31,SLFN12L,SOCS3,SRCIN1,STAT3,STAT4,STING1,STK4,TAL1,TCIM,TCIRG1,TIMP1,TREX1	57
	Lipid Metabolism,Molecular Transport,Small Molecule Biochemistry	Concentration of lipid	8.64e-07		1.227	ADIPOR2,AHR,ANGPTL4,APOD,ATF3,ATP1A1,BCL2L1,BHLHE40,BMP4,Ccl2,CDKN1A,CDKN1B,CFB,CHST8,CISH,DGKE,EP300,ESYT3,FAS,FBXO42,FFAR4,FGF7,FKBP5,FOXO3,GLP1R,GPAT4,HCAR2,HELZ2,HOXA5,IL18BP,IL1RN,JDP2,KDM5C,KLF15,MAP2K1,MAPK7,MMP11,MYC,MYD88,NAMPT,NR4A1,NR5A2,PDE3B,PEX11A,PML,PNPLA2,PTGER4,PTGS2,PTPN1,RAPGEF3,RARA,RGCC,RSC1A1,SAFB,SEMA7A,SGMS1,SIRT5,Slurp2,SNRK,SPHK1,STARD3,STAT3,TIMP1,TLR9	64
	Cell Death and Survival,Organismal Injury and Abnormalities	Apoptosis of lymphatic system cells	2.29e-14		1.268	ADAR,AHR,ATF3,BCL2L1,BMP4,CCDC86,Ccl2,CCL4,CDKN1A,CDKN1B,CUL9,DCK,DHX58,EFNB1,EGR3,EIF2AK2,EP300,FAS,FCGR3A/FCGR3B,FGL2,FOXO3,Foxp1,HSH2D,IER3,IFIH1,KLF13,KLF2,MAP2K1,MCF2L,Ms4a4c (includes others),MYC,MYD88,NQO2,NR4A1,PARP14,PIM1,PML,PNP,RIPK1,S1PR1,SPHK1,ST14,STAT3,STING1,SYVN1,TIMP1	46
	Infectious Diseases,Organismal Injury and Abnormalities	Sepsis	7.29e-13		1.27	ADRA1A,ALPL,ATF3,BAIAP2,BCL2L1,Bst2,CSK,EFNB1,ETV6,FAS,FCGR1A,FCGR3A/FCGR3B,HCAR2,IFI16,IFI35,IFIH1,IFIT3,IFITM3,IL18BP,IL1RN,IRF7,ISG15,KCNJ2,MAP3K5,MYC,MYD88,NAMPT,NMI,OASL,PDE3B,PTGS2,PTPN1,RIGI,SMTN,SOCS3,SPHK1,STAT3,STAT4,TBK1,TOR1AIP2,TRAFD1,Trim30a/Trim30d,XAF1	43
	Cell Death and Survival,Organismal Injury and Abnormalities	Apoptosis of mononuclear leukocytes	7.96e-14		1.337	ADAR,AHR,ATF3,BCL2L1,BMP4,CCDC86,Ccl2,CCL4,CDKN1A,CDKN1B,CUL9,DCK,DHX58,EFNB1,EGR3,EIF2AK2,EP300,FAS,FCGR3A/FCGR3B,FGL2,FOXO3,Foxp1,GADD45G,HSH2D,IER3,IFIH1,KLF13,KLF2,MAP2K1,MCF2L,Ms4a4c (includes others),MYC,NQO2,NR4A1,PARP14,PNP,RIPK1,S1PR1,SPHK1,ST14,STAT3,STING1,SYVN1,TIMP1	44
	Infectious Diseases,Organismal Injury and Abnormalities	Viral Infection	6.06e-20		1.347	AASS,ADAR,ADARB1,ADRA1A,AHR,ALPL,APOBEC3B,APOD,ARL5B,ATP1A1,BAIAP2,BCL2L1,Bst2,Ccl2,CCL4,CDKN1A,CDKN1B,CFB,CHMP4B,CLK1,CMTR1,CREBBP,CTDP1,CYTH1,DAXX,DCP2,DHX58,DTX2,DUSP16,EGR3,EIF2AK2,EP300,EPOR,ERCC5,FAS,FCGR1A,FCGR3A/FCGR3B,FGF7,FGL2,FKBP5,FOSL2,FOXO3,FURIN,GLP1R,GLUL,HERC6,HERPUD1,HES1,HLA-E,HLX,IARS1,IER3,IFI35,IFI44,IFIH1,IFIT1,IFIT3,IFITM3,IL18BP,IL1RN,INTS6,IRF2,IRF7,IRF9,ISG15,ISG20,ITGA…	151
	Cell Death and Survival,Organismal Injury and Abnormalities	Apoptosis of leukocytes	6.15e-18		1.433	ADAR,AHR,ATF3,BCL2L1,BIRC2,BMP4,CCDC86,Ccl2,CCL4,CDKN1A,CDKN1B,CUL9,DCK,DHX58,EFNB1,EGR3,EIF2AK2,EP300,FAS,FCGR3A/FCGR3B,FGL2,FOXO3,Foxp1,GADD45G,GRN,HCAR2,HSH2D,IER3,IFIH1,IL1RN,IRF2,ISG15,KLF13,KLF2,MAP2K1,MCF2L,Ms4a4c (includes others),MYC,MYD88,NAMPT,NQO2,NR4A1,PARP14,PIM1,PNP,PTGER4,RIPK1,S1PR1,SPHK1,SRCIN1,ST14,STAT3,STING1,SYK,SYVN1,TIMP1,TLR9,ZBP1	58
	Cell Death and Survival,Organismal Injury and Abnormalities	Apoptosis of lymphocytes	7.25e-14		1.479	ADAR,AHR,ATF3,BCL2L1,BMP4,CCDC86,Ccl2,CCL4,CDKN1A,CDKN1B,CUL9,DCK,DHX58,EFNB1,EGR3,EIF2AK2,EP300,FAS,FCGR3A/FCGR3B,FGL2,FOXO3,Foxp1,HSH2D,IER3,IFIH1,KLF13,KLF2,MAP2K1,MCF2L,Ms4a4c (includes others),MYC,NQO2,NR4A1,PARP14,PNP,RIPK1,S1PR1,SPHK1,ST14,STAT3,STING1,SYVN1,TIMP1	43
	Cell Death and Survival,Organismal Injury and Abnormalities	Apoptosis of tumor cell lines	7.76e-10		1.638	ADI1,ADIPOR2,AHR,AIFM2,ANGPTL4,ATF3,ATP1A1,BAZ1A,BCL2L1,BHLHE40,BIRC2,BMP4,CCDC6,CCN1,CDKN1A,CDKN1B,CREBBP,CTPS1,CUL9,DAXX,DDX21,EGR3,EIF2AK2,EP300,EPOR,EVA1C,FAS,FFAR4,FHIT,FKBP5,FOXO3,GADD45G,GATA2,GDNF,GLP1R,GPD1L,GRN,HAP1,HCAR2,HES1,HK2,HOXA5,HSH2D,IER3,IFI16,INTS6,KLF10,KLF2,KLF9,KSR1,LGALS3BP,MAP2K1,MAP3K5,MAPK12,MAPK7,Muc4,MYC,MYCT1,MYD88,NMI,NR4A1,NR4A2,OAS3,OGFR,PARP14,PIM1,PIWIL4,PLAUR,…	101
	Cardiovascular Disease,Cell Death and Survival,Organismal Injury and Abnormalities,Skeletal and Muscular Disorders	Cell death of cardiomyocytes	5.03e-07		1.657	ADRA1A,BCL2L1,CCN1,CDKN1A,CDKN1B,CSK,DAXX,FAS,FOXO3,GLP1R,HK2,IL1RN,MAP2K1,MAP3K5,NAMPT,NR4A1,PIM1,PNPLA2,SOCS3,SPHK1,STAT3,STK4,TIMP1	23
	Cell Death and Survival,Organismal Injury and Abnormalities	Apoptosis of blood cells	1.26e-17		1.673	ADAR,AGRN,AHR,ATF3,BCL2L1,BIRC2,BMP4,CCDC86,Ccl2,CCL4,CDKN1A,CDKN1B,CREBBP,CUL9,DCK,DHX58,EFNB1,EGR3,EIF2AK2,EP300,EPOR,FAS,FCGR3A/FCGR3B,FGL2,FOXO3,Foxp1,GADD45G,GRN,HCAR2,HSH2D,IER3,IFIH1,IL1RN,IRF2,ISG15,KLF13,KLF2,MAP2K1,MCF2L,Ms4a4c (includes others),MYC,MYD88,NAMPT,NQO2,NR4A1,PARP14,PIM1,PNP,PTGER4,RIPK1,S1PR1,SPHK1,SRCIN1,ST14,STAT3,STING1,SYK,SYVN1,TIMP1,TLR9,ZBP1	61
	Organismal Development	Growth of organism	2.41e-09		1.78	AARS1,ADAMTS1,ADAR,ADARB1,AHR,BCL2L1,BMP4,BYSL,CDKN1A,CDKN1B,CSNK1D,DAXX,EFNB1,EIF2AK2,EP300,ERCC5,ERO1B,FGF7,FOSL2,FOXO3,Foxp1,FURIN,GATA2,GATA3,GRN,HAP1,HES1,HHEX,HOXA5,IL1RN,ISG15,KCNJ2,KLF2,KSR1,LNX2,MAP2K1,MAPK7,MYC,MYD88,OPA3,OSR1,PLK2,PNPT1,PTCH1,PTGS2,RARA,S1PR1,SAFB,SLC25A25,SLC39A14,SNAI1,SOCS3,SOX11,STAT3,STAT4,STK4,STK40,TAL1,TCIRG1,TLR9,TMPRSS2,TTYH1,USP18,WNT7A,ZC3HAV1,ZFP36L1	66
	Cell Death and Survival,Organismal Injury and Abnormalities	Cell death of carcinoma cell lines	3.76e-07		1.781	ADAR,ADI1,ANGPTL4,ATP1A1,BCL2L1,BIRC2,BMP4,CCDC6,CDKN1A,CDKN1B,EP300,EVA1C,FAS,FHIT,FOXO3,GPM6A,GRN,HAP1,HK2,IFI16,KLF2,MAP3K5,MAPK7,MYC,MYCT1,NR4A2,NT5E,OGFR,PIM1,PML,PTGS2,PTPN1,RIGI,RIPK1,SPHK1,STAT3,TBK1,USP10,VCAN	39
	Cellular Development	Maturation of cells	6.62e-07		1.869	AHR,ATF3,BCL2L1,BMP4,BNC1,CDKN1A,CDKN1B,CSK,EFNB1,FAS,FOXO3,Foxp1,GATA2,GATA3,GDNF,GPAT4,HES1,HOXA5,IFIH1,KLF2,KLF9,LFNG,MAP3K5,MYC,MYD88,NR4A2,PARP14,PTGS2,PTPN1,RELN,RIGI,Slfn1,Slfn2,SMAD9,STAT3,TAL1,TLR9,WNT7A	38
	Cell Death and Survival	Apoptosis	1.22e-18		1.959	AARS1,ADAMTS1,ADAR,ADARB1,ADI1,ADIPOR2,ADRA1A,AGRN,AHR,AIFM2,ANGPTL4,APOBEC3B,APOL6,APPL1,AREL1,ATF3,ATP1A1,BAZ1A,BCL2L1,BHLHE40,BIRC2,BMP4,C19orf12,CCDC6,CCDC86,Ccl2,CCL4,CCN1,CDKN1A,CDKN1B,CECR2,CFB,CREBBP,CSK,CTPS1,CUL9,DAXX,DCK,DDX21,DGKE,DHX58,EFNB1,EGR3,EIF2AK2,EIF6,EP300,EPOR,ERCC5,ETV6,EVA1C,FANCI,FAS,FCGR1A,FCGR3A/FCGR3B,FFAR4,FGL2,FHIT,FKBP5,FOXO3,Foxp1,FURIN,FUT4,GADD45G,GATA2,GATA3,GD…	193
	Infectious Diseases,Organismal Injury and Abnormalities	Replication of RNA virus	3.64e-20	Increased	2.329	ADAR,APOBEC3B,BCL2L1,Bst2,CCL4,CDKN1A,CDKN1B,CHMP4B,CLK1,CMTR1,DHX58,DTX2,EIF2AK2,FCGR1A,FGF7,HERPUD1,IFIH1,IFIT1,IFITM3,IL1RN,IRF2,IRF7,ISG15,ISG20,LARP1,LIMK1,LY6E,MAP2K1,MITD1,MOV10,MYC,MYD88,NMI,NUP98,OAS1,Oas1b,OAS3,OASL,Oasl2,PARP11,PARP12,PARP14,PIK3R5,PML,PTGS2,PTPN1,PTX3,RBMS2,RIGI,SAFB,SAMHD1,SOCS3,SPHK1,STAT2,STAT3,STAT4,STING1,SUPT6H,TBK1,TLR9,TMPRSS2,TRIM14,UBA7,UBE2L6,USP18,ZC3HAV1,…	67
	Infectious Diseases,Organismal Injury and Abnormalities	Replication of Murine herpesvirus 4	1.77e-07	Increased	2.646	ADAR,IFIH1,ISG20,MITD1,OAS1,PARP12,RIGI	7
	Infectious Diseases,Organismal Injury and Abnormalities	Replication of Herpesviridae	1.64e-09	Increased	2.666	ADAR,AHR,IFIH1,ISG20,MITD1,MYD88,OAS1,OASL,Oasl2,PARP12,PML,RIGI,SAMHD1,TDRD7,TLR9,ZBP1	16
	Infectious Diseases,Organismal Injury and Abnormalities	Replication of virus	4.5e-20	Increased	2.851	ADAR,AHR,APOBEC3B,BCL2L1,Bst2,CCL4,CDKN1A,CDKN1B,CHMP4B,CLK1,CMTR1,DAXX,DHX58,DTX2,EIF2AK2,FCGR1A,FGF7,HERPUD1,IFIH1,IFIT1,IFITM3,IL1RN,IRF2,IRF7,ISG15,ISG20,LARP1,LIMK1,LY6E,MAP2K1,MITD1,MOV10,MYC,MYD88,NMI,NUP98,OAS1,Oas1b,OAS3,OASL,Oasl2,PARP11,PARP12,PARP14,PIK3R5,PML,PTGS2,PTPN1,PTX3,RBMS2,RIGI,SAFB,SAMHD1,SOCS3,SPHK1,STAT2,STAT3,STAT4,STING1,SUPT6H,TBK1,TDRD7,TLR9,TMPRSS2,TRIM14,UBA7,UBE2L6…	71
	Developmental Disorder,Organismal Injury and Abnormalities,Organismal Survival	Death of embryo	3.51e-07	Increased	3.042	ADAR,AHR,BCL2L1,BIRC2,BMP4,BYSL,CCN1,CDKN1A,CDKN1B,CREBBP,CSK,DAXX,EIF6,EP300,EPOR,ETV6,FGF7,Foxp1,FURIN,GATA2,GATA3,HK2,ISG15,ITGA5,KLF2,LFNG,LY6E,MAP2K1,MAPK7,MYC,NR5A2,PFKFB3,PHC2,PNPT1,PPRC1,PTCH1,RARA,RIGI,RIPK1,RNF31,S1PR1,SEC24C,SNAI1,SOCS3,SPHK1,STAT3,STING1,TBK1,TTYH1	49
	Infectious Diseases,Organismal Injury and Abnormalities	Replication of Flaviviridae	1.4e-07	Increased	3.457	ADAR,EIF2AK2,IFIT1,IFITM3,ISG15,MAP2K1,MOV10,Oas1b,OASL,RIGI,SOCS3,STING1,UBA7,UBE2L6	14
	Infectious Diseases,Organismal Injury and Abnormalities	Replication of Rhabdoviridae	6.87e-14	Increased	3.497	DHX58,FCGR1A,HERPUD1,IFIH1,IFITM3,IL1RN,ISG20,LY6E,MITD1,MYD88,OAS1,OASL,Oasl2,PARP11,PARP12,PML,PTPN1,RIGI,STAT2,STING1,TBK1	21
	Infectious Diseases,Organismal Injury and Abnormalities	Infection of mammalia	1.03e-07	Increased	3.562	AHR,Bst2,Ccl2,CFB,DHX58,EIF2AK2,FCGR1A,FUT4,GRN,HLA-E,IFIH1,IL1RN,IRF7,IRF9,ISG15,JDP2,Muc4,MYD88,Oas1b,PLAUR,PML,PTX3,RIGI,SAMHD1,SIGLEC1,STAT2,STAT4,TIMP1,TLR9,TMPRSS2,USP18	31
	Infectious Diseases,Organismal Injury and Abnormalities	Replication of vesicular stomatitis virus	2.87e-13	Increased	3.689	DHX58,FCGR1A,HERPUD1,IFIH1,IFITM3,IL1RN,ISG20,LY6E,MITD1,MYD88,OAS1,OASL,Oasl2,PARP11,PARP12,PML,RIGI,STAT2,STING1,TBK1	20
	Cell Signaling	Replication of viral replicon	1.29e-11	Increased	3.827	APOBEC3B,Bst2,EIF2AK2,IFI16,IFIH1,IFIT1,IFITM3,ISG15,ISG20,OAS1,OAS3,OASL,PTGS2,ZC3HAV1,ZNFX1	15
	Cell Signaling	Viral life cycle	1.41e-09	Increased	3.955	APOBEC3B,Bst2,CREBBP,EIF2AK2,IFI16,IFIH1,IFIT1,IFITM3,ISG15,ISG20,OAS1,OAS3,OASL,PTGS2,ZC3HAV1,ZNFX1	16
	Organismal Injury and Abnormalities,Organismal Survival	Organismal death	1e-11	Increased	4.401	ADAMTS1,ADAR,ADARB1,ADRA1A,AGRN,AHR,ALDH5A1,ALPL,ANGPTL4,ANKRD17,APOD,ATF3,ATP1A1,BCL2L1,BHLHE40,BIRC2,BMP4,BYSL,CCDC86,Ccl2,CCN1,CDKN1A,CDKN1B,CECR2,CFB,CLK1,CREBBP,CSK,CSNK1D,CUL9,DAXX,DDX24,DHX58,EFNB1,EGR3,EIF2AK2,EIF6,EP300,EPOR,ERCC5,ETV6,FAS,FBXL4,FBXO45,FGF7,FHIT,FLNC,FOSL2,FOXO3,Foxp1,FURIN,GADD45G,GATA2,GATA3,GDNF,GLP1R,GPD1L,GRN,HAP1,HES1,HEY1,HHEX,HK2,HLX,HOXA5,IFIH1,IL1RN,IRF2,IRF7,I…	167

## Sheet: f IPA USRs 2dpi
	Upstream Regulator	Expr Log Ratio	Molecule Type	Predicted Activation State	Activation z-score	Flags	p-value of overlap	Target Molecules in Dataset	Mechanistic Network			Cytokine USRs	Upstream Regulator	Expr Log Ratio	Molecule Type	Predicted Activation State	Activation z-score	Flags	p-value of overlap	Target Molecules in Dataset	Mechanistic Network
DEGs from BA.5+MP vs. BA.5, 2 dpi, IPA upstream regulator analysis.	CITED2		transcription regulator	Activated	6.463	bias	9.22e-29	ABTB2,ADAP2,ANGPTL4,AREL1,CALHM6,Ccl2,CMPK2,DAXX,DTX3L,FCGR3A/FCGR3B,GBP4,HCAR2,IFI16,IFI35,IFI44,IFIH1,IFIT3,IL1RN,IRF2,IRF9,ISG15,LGALS9B,Ms4a4c (includes others),NAMPT,OAS1,OAS3,OASL,Oasl2,PARP14,PARP9,PFKFB3,PHF11,PIM1,RBMS2,RIGI,RTP4,Slfn1,SLFN12L,TOR1AIP1,TREML2,Trim30a/Trim30d,TRIM6-TRIM34,XAF1,ZBP1	144 (10)				IFNG		cytokine	Inhibited	-7.825		7.91e-42	ABTB2,AGRN,AHR,ALPL,ANGPTL4,APOL6,AREL1,ATF3,ATP1A1,BCL2L1,BIRC2,Bst2,CALHM6,Ccl2,CCL4,CDKN1A,CDKN1B,CFB,CHST8,CISH,CMPK2,CSK,DAXX,DTX3L,EGR3,EIF2AK2,EPOR,FAM107A,FAS,FCGR1A,FCGR3A/FCGR3B,FGL2,FKBP5,FURIN,GATA3,GBP4,GDNF,GLUL,HCAR2,HERC6,HES1,HK2,HLA-E,IER3,IFI16,IFI35,IFI44,IFIH1,IFIT1,IFIT3,IFITM3,IL18BP,IL1RN,IRF2,IRF7,IRF9,ISG15,ISG20,ITGA5,KCTD7,KLF10,KLF2,LGALS3BP,LGALS9B,LIMK1,Ly6a (includ…	234 (17)
	SN-011		chemical reagent	Activated	6.325	bias	3.86e-48	ADAR,Bst2,CDKN1A,DTX3L,EIF2AK2,FCGR1A,GBP4,HERC6,IFI44,IFIH1,IFIT3,IFITM3,IRF7,IRF9,ISG15,LGALS9B,LY6E,MOV10,MYD88,NAMPT,OAS1,OAS2,OAS3,OASL,PML,RIGI,RNF114,RTP4,SAMHD1,SLFN5,STAT2,TAPBP,TRAFD1,TRIM14,UBA7,UBE2L6,USP18,XAF1,ZBP1,ZC3HAV1					IFNA2		cytokine	Inhibited	-6.177	bias	3.05e-34	APOL6,CDKN1A,CDKN1B,CISH,CMPK2,EIF2AK2,FAS,GBP4,HERC6,HLA-E,HSH2D,IFI16,IFI35,IFI44,IFIH1,IFIT1,IFIT3,IFITM3,IRF7,IRF9,ISG15,ISG20,LGALS3BP,LY6E,MAP2K1,MYC,NT5E,OAS1,OAS2,OAS3,OASL,OGFR,PARP12,PARP9,PHF11,PML,PSME1,RIGI,SAMHD1,SOCS3,STAT4,TDRD7,THEMIS2,TREX1,TRIM14,UBA7,UBE2L6,USP18,XAF1,ZBP1,ZC3HAV1	186 (17)
	Ttc39aos1		other	Activated	6.042	bias	7.22e-45	Apol9a/Apol9b,B4GALT4,Ccl2,CCL4,DHX58,DTX3L,EIF2AK2,IFI16,IFI35,IFI44,IFIH1,IFIT1,IFIT3,IFITM3,IRF7,IRF9,ISG15,LGALS3BP,Ly6a (includes others),LY6E,MOV10,Oas1b,OAS2,OAS3,PARP14,PARP9,PHF11,RIGI,RNF213,RTP4,SLFN12L,Trim30a/Trim30d,TRIM6-TRIM34,UBE2L6,USP18,XAF1,ZNFX1	140 (10)				PRL		cytokine	Inhibited	-5.17		1.23e-29	ADAR,AEN,BCL2L1,Ccl2,CDKN1A,CDKN1B,CISH,CMPK2,DHX58,DTX3L,EIF2AK2,HELZ2,HERC6,HERPUD1,HES1,IER3,IFI35,IFI44,IFIH1,IFIT1,IFIT3,IRF7,IRF9,ISG15,LY6E,MYC,OAS1,OAS2,OAS3,PAQR8,PARP10,PARP12,PARP14,PIM1,PNPT1,PPRC1,PRR15L,PSME1,RARA,RIGI,SAMHD1,SHISA5,SOCS3,STAT2,STAT3,TDRD7,TIMP1,TNFRSF12A,TRIM14,TSC22D1,USP18,XAF1,ZCCHC2	197 (19)
	PNPT1	-0.306	enzyme	Activated	5.515	bias	5.61e-43	AGRN,Apol9a/Apol9b,BCL2L1,Bst2,CDKN1A,CDKN1B,CMPK2,EIF2AK2,GBP4,IFI16,IFI44,IFIH1,IFIT3,IRF7,ISG15,LGALS3BP,MYC,OAS1,Oas1b,Oasl2,PARP12,PARP14,PARP9,RIGI,RNF213,RTP4,Sp100,STAT2,TOR3A,Trim30a/Trim30d,UBE2L6,USP18,XAF1	206 (12)				IFNL1		cytokine	Inhibited	-5.086	bias	5.47e-28	APOL6,ATF3,CMPK2,EIF2AK2,HERC6,IFI35,IFI44,IFIH1,IFIT1,IFIT3,IFITM3,IRF9,ISG15,ISG20,LGALS3BP,OAS1,OAS2,OAS3,OASL,PHF11,PML,RIGI,RTP4,STAT2,TDRD7,TRIM14,UBE2L6,USP18,XAF1,ZC3HAV1	231 (15)
	TRIM24		transcription regulator	Activated	5.512	bias	1.14e-34	AGRN,Apol9a/Apol9b,Bst2,CALHM6,CCL4,CMPK2,DHX58,GBP4,GLUL,HERC6,Ifi27l2a/Ifi27l2b,IFI35,IFI44,IFIH1,IFIT3,IRF7,IRF9,ISG15,LGALS3BP,Ly6a (includes others),MOV10,Ms4a4c (includes others),NMI,OAS1,OASL,PARP12,PHF11,PSMB10,RIGI,RTP4,SAMHD1,SHISA5,STAT2,TRAFD1,TRIM26,TRIM6-TRIM34,UBA7,USP18	171 (13)				IFNB1		cytokine	Inhibited	-5.071		7.42e-31	APOL6,BCL2L1,BHLHE40,Bst2,Ccl2,CCL4,CDKL2,CDKN1A,CMPK2,DAXX,DHX58,EIF2AK2,GBP4,IFI16,Ifi27l2a/Ifi27l2b,IFIH1,IFIT1,IFIT3,IRF7,IRF9,ISG15,ISG20,MYC,MYD88,NMI,NOCT,OAS1,Oas1b,OAS2,Oasl2,PARP10,PARP12,PARP14,PARP9,PML,PTCH1,PTGS2,RIGI,SLC39A14,SLFN13,STAT2,STAT4,TIMP1,TLR9,TRIM14,Trim30a/Trim30d,TRIM6-TRIM34,UBA7,USP18,XAF1,ZBP1,ZDHHC14	214 (16)
	ETV6	-0.242	transcription regulator	Activated	5.484	bias	1.07e-33	APOL6,CMPK2,CMTR1,DHX58,DTX3L,EIF2AK2,IFI16,IFI35,IFI44,IFIT1,IFIT3,ISG15,LAP3,LGALS3BP,Ly6a (includes others),MYD88,OAS1,OAS2,OAS3,OASL,PARP10,PARP14,PARP9,PHF11,RIGI,SIGLEC1,STAT2,TRIM14,UBE2L6,XAF1,ZNFX1	149 (7)				TNF		cytokine	Inhibited	-4.835		9.3e-24	ABTB2,ADAR,ANGPTL4,APOBEC3B,ATF3,ATP1A1,BCL2L1,BHLHE40,BIRC2,BMP4,CALHM6,Ccl2,CCL4,CCN1,CDC42EP4,CDKN1A,CFB,CISH,DAXX,DUSP14,DUSP16,EGR3,EIF2AK2,EP300,EPOR,ETV6,FAS,FOSL2,FUT4,GADD45G,GATA2,GATA3,GBP4,GDNF,GLUL,GRN,HES1,HK2,HLA-E,HSH2D,IER3,IFI16,IFI35,IFIH1,IFIT1,IFIT3,IFITM3,IL18BP,IL1RN,IRF2,IRF7,IRF9,ISG15,ISG20,ITGA5,KCNJ2,KLF10,KLF2,KLF7,LFNG,LGALS9B,LIMK1,MEOX2,MUC20,MYC,MYD88,NAMPT,NOCT,N…	237 (17)
	RNASEH2B		other	Activated	5.461	bias	7.62e-29	APOL6,Bst2,CDKN1A,CFB,CMPK2,DHX58,EIF2AK2,HELZ2,HERC6,IFI35,IFI44,IFIH1,IFIT1,IFIT3,IFITM3,IRF2,IRF7,ISG15,ISG20,LGALS3BP,MOV10,OAS1,OAS2,OAS3,PARP14,PARP9,PSME1,PTGS2,RIGI,RTP4,TRIM14,UBA7,USP18,XAF1	93 (4)				IL1B		cytokine	Inhibited	-4.65		5.21e-17	ADAMTS1,ALPL,ANGPTL4,APOL6,ATF3,ATP1A1,BCL2L1,BIRC2,BMP4,Ccl2,CCL4,CDKN1A,CFB,CISH,CMPK2,DPY19L4,EP300,FAS,FGF7,FKBP5,FURIN,GATA3,GBP4,GRN,HELZ2,HES1,HK2,HLA-E,IER3,IFI16,IFIT1,IFIT3,IFITM3,IL1RN,IRF7,ISG15,ISG20,ITGA5,KLF10,LGALS9B,MMP11,MYC,MYD88,NAMPT,NMI,NOCT,NR4A1,NR4A2,OAS2,OSMR,PIM1,PSMB10,PTGS2,PTX3,RARA,RGCC,S1PR1,Saa3,SLC25A25,SLC39A14,Slfn2,SMAD9,SNAI1,SOCS3,STAT3,STAT4,SYVN1,TATDN3,TC…	227 (14)
	Irgm1		other	Activated	5.445	bias	3.02e-27	APOBEC3B,Apol9a/Apol9b,Ccl2,DHX58,FAS,GBP4,HERC6,IFI16,Ifi27l2a/Ifi27l2b,IFI35,IFI44,IFIH1,IFIT3,IFITM3,IRF7,IRF9,ISG15,ISG20,OAS1,Oas1b,OAS2,OAS3,OASL,Oasl2,RIGI,SAMHD1,TRIM14,Trim30a/Trim30d,USP18,XAF1,ZBP1	210 (19)				IL6		cytokine	Inhibited	-3.779		9.13e-07	ADAMTS1,AHR,ATF3,BCL2L1,Ccl2,CCL4,CDKN1A,CDKN1B,CISH,DUSP16,EPOR,FAS,FCGR1A,GADD45G,IFI16,IFIT1,IFITM3,IL1RN,IRF9,MAP2K1,MYC,MYD88,NAMPT,PIM1,PLK2,PPRC1,PSMB10,PSME1,PTGER4,PTGS2,S1PR1,Saa3,SLC39A14,SNAI1,SOCS3,STAT3,STAT4,STING1,TAL1,TIMP1,TLR9,TNFRSF12A	232 (18)
	IRGM		enzyme	Activated	5.403	bias	2.58e-27	CMPK2,DHX58,GBP4,HELZ2,IFI16,IFI35,IFI44,IFIH1,IFIT1,IFIT3,IFITM3,IRF7,IRF9,ISG15,ISG20,MAP3K6,OAS1,OAS2,OAS3,OASL,RIGI,SAMHD1,SOCS3,STAT2,TRIM14,UBA7,UBE2L6,USP18,XAF1,ZBP1	136 (7)				IFNA4		cytokine	Inhibited	-3.642	bias	3.3e-12	Bst2,H2-T24,HLA-E,IFIH1,IFIT1,ISG15,Ly6a (includes others),MITD1,MYC,OASL,STAT4,TREML2,USP18,ZBP1	190 (18)
	ETV3		transcription regulator	Activated	5.385	bias	2.6e-32	DHX58,DTX3L,EIF2AK2,HELZ2,IFI16,IFI35,IFI44,IFIH1,IFIT1,IFIT3,IRF7,IRF9,LAP3,LY6E,MYC,OAS1,OAS2,OAS3,OASL,OGFR,PARP10,PARP9,RIGI,SHISA5,SIGLEC1,STAT2,TRIM14,USP18,XAF1					IFNA1/IFNA13		cytokine	Inhibited	-3.4	bias	1.9e-12	DHX58,EIF2AK2,IFIH1,IFIT1,IRF7,ISG15,MYC,OAS1,OAS2,PTGS2,SIGLEC1,STAT2,STAT4,UBE2L6,ZBP1	190 (18)
	TREX1	-0.561	enzyme	Activated	5.227	bias	4.81e-50	ADAR,APOL6,Bst2,CDKN1A,CFB,CMPK2,DHX58,DTX3L,EIF2AK2,FCGR1A,GBP4,HELZ2,HERC6,IFI16,Ifi27l2a/Ifi27l2b,IFI44,IFIH1,IFIT1,IFIT3,IFITM3,IRF2,IRF7,IRF9,ISG15,ISG20,LGALS9B,Ly6a (includes others),LY6E,MOV10,MYD88,NAMPT,OAS1,OAS2,OAS3,OASL,PARP14,PARP9,PML,PSME1,RIGI,RNF114,RTP4,SAMHD1,SLFN5,STAT2,TAPBP,TRAFD1,TRIM14,UBA7,UBE2L6,USP18,XAF1,ZBP1,ZC3HAV1	162 (11)				PF4		cytokine	Inhibited	-3.121		2.72e-07	CCL4,CDKN1A,CMPK2,Foxp1,GATA2,IL1RN,ISG15,RARA,RIGI,SPHK1,STAT2,USP18	214 (20)
	MAPK1		kinase	Activated	4.744		1.82e-26	ADAR,ANGPTL4,APOL6,ATF3,CCL4,CDKN1A,CDKN1B,CFB,CISH,EIF2AK2,FLNC,FOSL2,GATA3,HLA-E,IFI16,IFI35,IFI44,IFIH1,IFIT1,IFIT3,IFITM3,IL1RN,IRF7,IRF9,ISG15,ISG20,ITGA5,LAP3,LGALS3BP,MYC,NMI,NR4A1,NT5E,OAS1,OAS2,OAS3,OASL,OGFR,PARP12,PHF11,PML,PTGS2,RGS2,RIGI,SAMHD1,SNAI1,SPSB1,STAT2,TDRD7,TRIM14,UBE2L6,USP18,ZC3HAV1	193 (20)				IL33		cytokine	Inhibited	-3.015	bias	1.16e-05	ADAMTS1,APOLD1,BCL2L1,Ccl2,CCL4,CISH,EGR3,FAS,FGL2,FOSL2,GATA3,HCAR2,IER3,IL1RN,IRF7,ITGA5,MYC,NR4A1,NT5E,PIK3R5,PTGER4,SIGLEC1,SOCS3,THEMIS2,TIMP1	189 (19)
	NKX2-3		transcription regulator	Activated	4.723		4.43e-19	ADAMTSL2,ALPL,ANGPTL4,BMP4,CDKN1A,CMPK2,DHX58,EIF2AK2,HELZ2,HEY1,IL18BP,KLF2,LAP3,LY6E,MYD88,PARP10,PARP12,PARP14,PARP9,PLEKHA4,PNPT1,PTGS2,RIGI,RNF213,RTP4,SLC25A28,STAT2,TCIM,UBA7,UBE2L6,USP18,XAF1,ZC3HAV1,ZNFX1	89 (5)				THPO		cytokine	Inhibited	-2.951		4.39e-07	BCL2L1,CISH,CMPK2,Foxp1,GATA2,ISG15,MYC,PIM1,RARA,RIGI,SOCS3,STAT2,USP18	205 (20)
	Scd2		enzyme	Activated	4.69	bias	6.64e-28	ADAR,CMPK2,HELZ2,HERC6,IFIT3,IRF7,ISG15,ISG20,LGALS3BP,Ly6a (includes others),NMI,OAS2,OAS3,OASL,PARP10,PARP14,RIGI,SLFN13,Trim12a,XAF1,ZBP1,ZC3HAV1	131 (8)				TNFSF13B		cytokine	Inhibited	-2.902		0.00012	BCL2L1,CCL4,FAS,HCAR2,HSH2D,IL1RN,MYC,NAMPT,NR4A2,PLAUR,SOX11,TNFRSF12A	196 (17)
	STAG2		other	Activated	4.575	bias	3.85e-24	CMPK2,DHX58,EIF2AK2,HELZ2,HERC6,IFI35,IFI44,IFIH1,IFIT3,IRF7,IRF9,ISG15,ISG20,LGALS3BP,OAS1,OASL,PARP12,PARP14,PARP9,UBE2L6,USP18					LIF		cytokine	Inhibited	-2.881		9.39e-07	BCL2L1,Ccl2,CDKN1A,CISH,GLUL,HES1,HEY1,HK2,IFI16,KLF10,MYC,NMI,PIM1,PTGS2,PTPN1,SOCS3,STAT3,TAL1,TIMP1	208 (23)
	KMT2D		transcription regulator	Activated	4.482		2.57e-09	DDX21,EBPL,EIF2AK2,IFIH1,IFIT3,IRF2,IRF7,IRF9,ISG15,NT5E,OASL,Oasl2,PARP11,PSMB10,PSME1,RIGI,SIX4,SLC38A6,STAT2,STAT3,STING1,TAPBP,TLR9,ZBP1					IFNL4		cytokine	Inhibited	-2.807	bias	6.17e-11	DHX58,IFIH1,IFIT1,ISG15,OAS1,OAS2,OASL,RIGI	121 (8)
	SIRT1		transcription regulator	Activated	4.406		5.94e-15	ADAR,BCL2L1,Ccl2,CDKN1A,CDKN1B,CMPK2,DHX58,EP300,FAS,FGF7,FOXO3,GPAT4,HELZ2,HK2,HOXA5,IFI44,IFIT3,IFITM3,IRF7,KLF2,LGALS3BP,LY6E,Ms4a6b,MYC,NMRK1,NT5E,OAS1,OAS2,Oasl2,PARP12,PARP14,PML,RIGI,RNF213,RTP4,Slfn2,SOCS3,STAT3,TAL1,Trim30a/Trim30d,UBA7,USP18	176 (16)				OSM		cytokine	Inhibited	-2.785		4.67e-11	ADAMTS1,AHR,ANGPTL4,ATF3,BAIAP2,BHLHE40,Ccl2,CDC42EP4,CDKN1A,CDKN1B,CFB,CISH,DDX27,DNASE1L2,EPHA1,GADD45G,GLUL,HK2,IER3,IFI35,IRF7,IRF9,ISG20,KLF10,MAPK7,MKNK2,MYC,MYD88,NAMPT,OAS1,OSMR,PDLIM5,PFKFB3,RSC1A1,SOCS3,STAT3,STK4,TAL1,TAPBP,TIMP1,UBE2L6,ZC3HAV1	243 (22)
	ACKR2		G-protein coupled receptor	Activated	4.347	bias	2.48e-19	ADAR,Ccl2,DHX58,EIF2AK2,IFI16,Ifi27l2a/Ifi27l2b,IFI44,IFIT3,IRF7,ISG15,ISG20,OAS1,OAS2,OAS3,OASL,Oasl2,RIGI,STAT2,USP18	153 (7)				IL2		cytokine	Inhibited	-2.785		5.58e-11	AHR,BCL2L1,BHLHE40,Ccl2,CCL4,CDKN1A,CDKN1B,CISH,CTPS1,DDX21,FAS,FCGR3A/FCGR3B,FGF7,FGL2,FOSL2,FOXO3,GADD45G,GATA3,GRN,HHEX,HK2,IER3,IFI16,IL18BP,IL1RN,ISG15,ISG20,KLF13,Ly6a (includes others),LY6E,MAP2K1,MYC,NMI,NT5E,PDE3B,PIM1,PNP,PTCH1,PTGS2,RGCC,RGS2,Sik1,SLA,SOCS3,STAT3,STAT4,TIMP1,TNFRSF12A,TRIB2	211 (18)
	USP8		peptidase	Activated	4.31	bias	7.27e-16	Bst2,Ccl2,IFI16,IFIT1,IFIT3,IFITM3,IRF7,ISG15,MYD88,OAS1,Oas1b,OAS2,OAS3,OASL,Oasl2,PSMB10,STAT2,TAPBP,TAPBPL	211 (16)				IL27		cytokine	Inhibited	-2.78		1.23e-06	AHR,CCL4,EIF2AK2,FAS,GADD45G,GATA3,HLA-E,IL18BP,IL1RN,MYC,OAS1,PIM1,PTGS2,SOCS3,STAT2	238 (18)
	PTGER4	-0.634	G-protein coupled receptor	Activated	4.291		8.57e-21	Ccl2,CCL4,CMPK2,DAXX,GBP4,GDNF,HCAR2,HERC6,HERPUD1,IFI16,IFI35,IFIH1,IRF7,ISG20,Oas1b,PARP14,PTGS2,RASSF2,RIGI,RNF144B,RNF213,RNF24,RTP4,S1PR1,SLFN13,SLFN5,TOR3A,USP18,XAF1,ZDHHC14,ZFP36L1	221 (11)				CSF2		cytokine	Inhibited	-2.734	bias	1.41e-07	BCL2L1,Ccl2,CCL4,CDKN1A,CDKN1B,CISH,EGR3,EPOR,FAS,FCGR1A,HCAR2,HK2,IER3,IFITM3,IL1RN,IRF2,MYC,NR4A1,NR4A2,OSMR,PIM1,PLAUR,PTGER4,PTGS2,RARA,RGCC,RHOV,Saa3,Slfn2,SOCS3,SPHK1,TLR9,TRIB2	209 (21)
	UBAP1		other	Activated	3.873	bias	7.17e-19	IFI35,IFIT1,IFIT3,IRF7,ISG15,ISG20,MYD88,OAS1,OAS2,OAS3,OASL,SAMHD1,STAT2,USP18,XAF1	146 (9)				IL17A		cytokine	Inhibited	-2.666		4.1e-05	BCL2L1,Ccl2,CCL4,CCN1,CFB,FAS,FGF7,IL1RN,ISG15,KLF2,MYC,NR4A2,OSMR,PTGS2,S1PR1,Saa3,SNAI1,SOCS3,SPSB1,STAT3,TIMP1	206 (15)
	RC3H1		enzyme	Activated	3.873	bias	5.14e-12	APOBEC3B,CCL4,IFI16,IFI44,IFIT1,IFIT3,IFITM3,IRF9,ISG15,OAS1,OAS2,OAS3,PARP9,RIGI,STAT2,STING1	196 (13)				IFNA14		cytokine	Inhibited	-2.586	bias	9.72e-08	IFIH1,IFIT1,IRF7,ISG15,ISG20,STAT4,ZBP1	146 (11)
	PTPN11		phosphatase	Activated	3.81		4.75e-11	BCL2L1,CDKN1A,FCGR1A,FCGR3A/FCGR3B,GATA2,IFI16,IFIT3,IRF7,ISG15,MAP3K5,Ms4a4c (includes others),MXD4,OASL,PIM1,PLAUR,Saa3,Slfn1,SOCS3	183 (18)				IFNE		cytokine	Inhibited	-2.538	bias	2.48e-08	CDKN1A,IFIH1,IFITM3,ISG15,ISG20,PTGER4,PTGS2,STAT4,USP18,ZBP1	177 (19)
	SOCS1		other	Activated	3.676	bias	9.47e-18	BCL2L1,Ccl2,CDKN1A,CISH,FAS,FKBP5,H2-T24,IFI16,IFI44,IFIH1,IFIT1,IFIT3,IRF7,ISG15,ISG20,MAP3K5,MYD88,OAS1,Oas1b,OAS2,Oasl2,PTGS2,RIGI,SNAI1,SOCS3,STAT3,USP18	203 (15)				IL3		cytokine	Inhibited	-2.477	bias	1.01e-05	BCL2L1,CDKN1A,CDKN1B,CISH,EGR3,EIF2AK2,FAS,FOSL2,GADD45G,GATA2,HK2,KLF13,KLF9,MYC,PIM1,PSME1,RIDA,SEMA7A,SOCS3,STAT4,TAL1,TARS1	186 (17)
	miR-182-5p (and other miRNAs w/seed UUGGCAA)		mature microRNA	Activated	3.434	bias	1.62e-08	CMPK2,FOXO3,GADD45G,HERC6,IFIT1,ISG15,NMI,OAS2,RIGI,RTP4,SLFN5,XAF1					CCL20		cytokine	Inhibited	-2.433	bias	0.000298	Ccl2,FCGR1A,IL1RN,Saa3,SYK,TREX1	143 (7)
	USP18	-0.578	peptidase	Activated	3.368	bias	1.9e-12	Ccl2,CCL4,IFIH1,IFIT1,IFITM3,IL1RN,IRF7,IRF9,ISG15,ISG20,OAS1,OASL,PLK2,RIGI,SOCS3	208 (15)				IL12A		cytokine	Inhibited	-2.415		0.000169	FAS,IRF9,SOCS3,STAT2,STAT3,STAT4	193 (17)
	RPSA		translation regulator	Activated	3.341	bias	2.93e-15	EIF2AK2,GBP4,IFI35,IFIT1,IFIT3,ISG15,ISG20,LAP3,LGALS3BP,OAS1,OAS3,OASL,PML,PTGS2,RIGI,TAPBP	216 (12)				CSF1		cytokine	Inhibited	-2.399	bias	8.81e-32	APOL6,BCL2L1,BHLHE40,Ccl2,CDKN1A,CDKN1B,CMPK2,CMTR1,DHX58,DTX3L,EGR3,EIF2AK2,FAS,FCGR3A/FCGR3B,HELZ2,HK2,IFI16,IFI35,IFI44,IFIH1,IFIT1,IFIT3,IL18BP,IRF7,IRF9,ISG15,ITGA5,JDP2,KLF2,LAP3,LGALS3BP,LY6E,MYC,MYD88,OAS1,OAS2,OAS3,OASL,OGFR,PARP10,PARP14,PARP9,PFKFB3,PHF11,RIGI,RIPK1,SAMHD1,SHISA5,SIGLEC1,SLFN12L,STAT2,TLR9,TRIM14,UBE2L6,USP18,XAF1,ZNFX1	226 (18)
	ETV6-RUNX1		fusion gene/product	Activated	3.316	bias	3.07e-14	APOLD1,Bst2,CSK,GATA3,IER3,IFI16,IFI35,IFIH1,IFIT1,IFIT3,IRF2,IRF7,IRF9,ISG15,ISG20,KCNJ2,MAP2K1,MKNK2,MYC,NMI,OAS1,OAS2,PDLIM5,PIK3C2B,PIM1,PML,SAMHD1,STAT2,STAT3,TBK1,TDRD7,TREX1,TRIM6-TRIM34,UBE2L6	116 (5)				IL21		cytokine	Inhibited	-2.393	bias	2.12e-14	BCL2L1,CALHM6,CCL4,CDKN1A,CDKN1B,CMPK2,EIF2AK2,FGL2,GATA3,HERC6,HLX,HSH2D,IFI16,IFIT1,IFIT3,IRF7,ISG15,MYD88,OAS2,OASL,SLFN13,SOCS3,STAT2,STAT3,STAT4,USP18	232 (17)
	ETV7		transcription regulator	Activated	3.308	bias	5.1e-12	APOL6,CFB,HERC6,IFI35,IFITM3,LY6E,PARP14,RARA,RIGI,TRIM14,UBE2L6	90 (3)				CNTF		cytokine	Inhibited	-2.387		2.63e-05	APOD,ATF3,Ccl2,CISH,GRN,HCAR2,IFI16,IL1RN,NAMPT,Oasl2,OSMR,PTGS2,SOCS3,Sp100,STAT3,TIMP1	168 (19)
	IRF2BP2		transcription regulator	Activated	3.283	bias	0.00018	FCGR3A/FCGR3B,Gm5431,HERC6,IFI16,MS4A6A,Ms4a6b,Ms4a6c,SLA,STAT4,TIMP1,Trim30a/Trim30d					TNFSF11		cytokine	Inhibited	-2.307	bias	4.82e-11	ADRA1A,AHR,BCL2L1,BMP4,Ccl2,CCL4,CDC42EP4,CDKN1A,CDKN1B,DUSP16,FAS,GRN,IER3,IL1RN,ITGA5,JDP2,LIMK1,MAP2K1,MYC,PIM1,PLAUR,PTGER4,PTGS2,Saa3,Slfn2,SOCS3,TCIRG1,USP18	194 (17)
	IL1RN	-0.508	cytokine	Activated	3.266	bias	1.86e-15	ATF3,CDKN1A,HERC6,IFI44,IFIH1,IFIT3,IL18BP,IRF7,IRF9,ISG20,KCTD7,OAS1,OAS2,OAS3,OASL,PML,PTGS2,RIGI,RIPK1,RTP4,STAT2,THEMIS2,TIMP1,USP18	234 (20)				Il3		cytokine	Inhibited	-2.249		7.25e-06	BCL2L1,BHLHE40,CDKN1A,CDKN1B,CISH,FAS,KSR1,Ly6a (includes others),MYC,PIM1	245 (20)
	IKZF1		transcription regulator	Activated	3.228		1.32e-08	ANKFY1,BCL2L1,CCL4,CDKN1A,CDKN1B,CISH,DTX3L,EPOR,FOXO3,GATA2,GATA3,GRN,HES1,HK2,IFI16,IFIT3,JADE2,LAP3,MLXIP,MYC,NRARP,RNF213,RTP4,SPSB1	219 (21)				IFNK		cytokine	Inhibited	-2.236	bias	0.000123	EIF2AK2,IFIH1,OAS1,STAT4,ZBP1	113 (7)
	IL10RA		transmembrane receptor	Activated	3.158		2.14e-06	BMP4,CALHM6,CCN1,CFB,FAS,HCAR2,IFI16,IL18BP,IL1RN,IRF7,LRIG3,Ly6a (includes others),NAMPT,NR5A2,RNF213,S1PR1,Saa3,SAMHD1,Slfn1,SOCS3,STAT3,ZBP1	201 (15)				EBI3		cytokine	Inhibited	-2.216		0.00895	FAS,GADD45G,MYC,PIM1,STAT2	231 (20)
	DUSP11		phosphatase	Activated	3.138	bias	7.05e-12	CMPK2,Ifi27l2a/Ifi27l2b,IFI44,IFIT3,IRF7,ISG15,OAS1,Oasl2,SLFN13,USP18	118 (7)				IL12B		cytokine	Inhibited	-2.207	bias	0.00204	Ccl2,IRF9,SOCS3,STAT2,STAT3,STAT4	229 (17)
	tyrphostin AG490		chemical drug	Activated	3.039	bias	0.000102	BCL2L1,Ccl2,CDKN1A,MYC,PIM1,PTGS2,PTX3,SOCS3,STAT3,TIMP1	188 (20)				IFNL3		cytokine	Inhibited	-2.195	bias	0.000391	IFIH1,ISG20,Oas1b,RIGI,USP18	111 (6)
	ziritaxestat		chemical drug	Activated	3		2.14e-06	APOL6,IFIT1,IFIT3,LAP3,OAS1,OAS2,OAS3,OASL,USP18					IFNA10		cytokine	Inhibited	-2.191	bias	8.66e-06	IFIH1,IFIT1,ISG15,STAT4,ZBP1	113 (7)
	ADAR	-0.45	enzyme	Activated	2.967	bias	5.07e-09	IFI44,IFIH1,IFIT3,IRF7,ISG15,PHF11,RIGI,TAPBP,USP18,XAF1	108 (5)				IFNA21		cytokine	Inhibited	-2.191	bias	8.66e-06	IFIH1,IFIT1,ISG15,STAT4,ZBP1	113 (7)
	losartan potassium		chemical drug	Activated	2.93		0.0247	ATP1A1,Ccl2,IFITM3,KLF15,PTGS2,SIGLEC1,SOCS3,STAT3,TIMP1					IFNA5		cytokine	Inhibited	-2.191	bias	8.66e-06	IFIH1,IFIT1,ISG15,STAT4,ZBP1	113 (7)
	PLCG2		enzyme	Activated	2.818		8.86e-05	Ccl2,DGKE,IFI16,IFIT3,IFITM3,ISG15,Ms4a6b,PTGS2,STAT2	235 (19)				IFNA7		cytokine	Inhibited	-2.191	bias	8.66e-06	IFIH1,IFIT1,ISG15,STAT4,ZBP1	113 (7)
	mir-21		microRNA	Activated	2.683		3.18e-08	BC147527,Ccl2,CDKN1A,CREBBP,DAXX,DHX58,FAM3C,FAS,FCGR1A,FGL2,GATA3,IFI16,LGALS3BP,Ly6a (includes others),MYC,MYD88,OAS2,OAS3,PER2,PPA1,SIGLEC1,Slfn2,Sp100,STAT2,STAT3,UBA7,UBE2L6	264 (20)				IFNA6		cytokine	Inhibited	-2.191	bias	8.66e-06	IFIH1,IFIT1,ISG15,STAT4,ZBP1	113 (7)
	SAHM1		chemical reagent	Activated	2.646	bias	3.35e-05	BHLHE40,HES1,HK2,LY6E,MYC,PFKFB3,VARS1					IFNA8		cytokine	Inhibited	-2.191	bias	1.28e-05	IFIH1,IFIT1,ISG15,STAT4,ZBP1	113 (7)
	STEAP3		transporter	Activated	2.646	bias	0.000221	ITGA5,KLF15,PNP,RGCC,S1PR1,SORBS3,TNFRSF12A					IFNA16		cytokine	Inhibited	-2.191	bias	1.28e-05	IFIH1,IFIT1,ISG15,STAT4,ZBP1	113 (7)
	PPARGC1A		transcription regulator	Activated	2.642		1.95e-06	ADAMTS1,ALDH5A1,APOD,BMP4,Ccl2,CDKN1A,DAXX,DUSP16,FAS,HK2,IL1RN,LGALS9B,MYC,MYD88,NR4A1,NR5A2,OSMR,PNPLA2,PTGS2,Saa3,Sik1,SIRT5,SLC25A25,SLC39A14,SOCS3,STAT3,TIMP1,TNFRSF12A,VCAN	185 (19)				IL11		cytokine	Inhibited	-2.176		0.0276	BCL2L1,SOCS3,SPHK1,STAT3,TIMP1
	NCOR1		transcription regulator	Activated	2.631	bias	1.45e-10	CDKN1A,CDKN1B,IFIT3,IRF7,ISG15,MYD88,OAS1,Oas1b,OAS2,OAS3,Oasl2,PIM1,PTGS2,RARA,RIGI,STAT2,ZBP1	253 (24)				CX3CL1		cytokine	Inhibited	-2.121		3.37e-05	ADAMTS1,APOD,BCL2L1,EFNB1,IFI16,IFIT3,IRF7,LGALS3BP,Meis1,RELN,RHPN2,SPHK1,TIMP1	178 (12)
	tofacitinib		chemical drug	Activated	2.611	bias	1.11e-06	CISH,HK2,IFIT3,ISG15,MYC,SOCS3,STAT3	248 (21)				IFNA17		cytokine		-1.982	bias	0.000196	EIF2AK2,IFIH1,STAT4,ZBP1	113 (7)
	DNASE2		enzyme	Activated	2.606	bias	1.01e-15	Apol9a/Apol9b,DHX58,IFIT3,IRF7,ISG15,Ly6a (includes others),Ms4a4c (includes others),OAS1,OAS3,Oasl2,RTP4,Sp100,USP18,ZBP1					CCL5		cytokine		-1.97	bias	0.00179	AHR,Ccl2,CCL4,NAMPT,PLAUR,PNP,STAT3	181 (18)
[truncated: 1,342 more rows]

## Sheet: g Yoshida SpatialDecon
	6 mice per group	M1 BA.5+MP	M2 BA.5+MP	M3 BA.5+MP	M4 BA.5+MP	M5 BA.5+MP	M6 BA.5+MP	M1 BA.5-MP	M2 BA.5-MP	M3 BA.5-MP	M4 BA.5-MP	M5 BA.5-MP	M6 BA.5-MP
[truncated: 38 more rows]

[truncated: 5 more sheets: h Nanostring SpatialDecon, i Xue GSEA , j MSigDB, k BTMs, l Interferome]
