# Supplementary material for: Microplastics dysregulate innate immunity in the SARS-CoV-2 infected lung
Source: Front Immunol. 2024 May 13;15:1382655. doi: 10.3389/fimmu.2024.1382655 (PMC11128561; doi:10.3389/fimmu.2024.1382655)
Supplement: Supplementary file 9 [file Table_8.xlsx]

## Sheet: 2 dpi
Mean CPM of genes that are DEGs in BA.5+MP vs. BA.5-MP (2 dpi)	geneName	PBS_d2	+MP_d2	BA.5-MP_2 dpi	BA.5+MP_2 dpi		BA5+MP/( BA5-MP plus +MP)
	NR4A1	146.505	151.877	110.614	325.319		1.23935	Synergistic induction
	CCN1	355.687	290.274	205.051	549.191		1.10875	Synergistic induction
	EGR3	6.50374	7.05003	6.27704	12.6114		0.946299
	RHOV	2.01583	1.55474	1.47081	2.58258		0.853592
	GM42669	1.38089	0.943544	1.02323	1.65087		0.839383
	NR4A2	7.15525	10.721	10.495	17.7302		0.835697
	ATF3	16.596	21.2605	40.2849	50.366		0.818355
	KLF2	119.096	223.983	186.244	334.641		0.815746
	APOLD1	4.25005	5.69428	4.54829	7.42948		0.725353
	DNASE1L2	3.6747	5.14377	4.06006	6.61824		0.719074
	ZFP239	1.91723	1.47309	1.43722	2.08166		0.715271
	GM17501	4.75176	5.51909	5.22096	7.67302		0.714431
	CASS4	18.7065	17.9933	12.405	21.5551		0.709091
	ENSMUSG00000121112.1	2.54318	2.52201	1.87764	3.10385		0.705476
	HLX	29.0975	41.2066	29.0683	49.5688		0.705355
	ZFP975	7.28466	7.953	8.60517	11.6586		0.704097
	NR5A2	2.22401	1.80237	0.97725	1.94083		0.698236
	SIK1	90.5256	117	110.336	158.587		0.697589
	GM14207	6.22412	5.16395	3.52433	6.023		0.693233
	EFS	11.1651	10.8856	10.6293	14.801		0.687941
	ZFP36L1	310.636	260.115	295.643	379.292		0.682477
	SCGB1C1	9.13243	7.95896	6.48798	9.82886		0.680342
	GM33280	1.76926	1.96276	1.82231	2.57395		0.680029
	PTGS2	10.7527	12.8942	16.2793	19.7618		0.677386
	EVA1A	6.91027	6.77164	6.1014	8.54998		0.664177
	NRARP	45.7475	58.5849	44.6865	68.3506		0.661854
	GM47467	3.7075	3.49411	2.78156	4.12261		0.656919
	ANKRD63	47.4438	31.4833	22.8795	35.5757		0.654412
	SLC25A25	28.6786	44.6981	45.1878	58.668		0.652694
	GASK1A	9.76045	9.96792	7.71978	11.4786		0.64896
	EPOR	6.18157	5.29494	3.93793	5.96436		0.645992
	HOXA5	43.252	41.4738	33.1478	47.9461		0.642523
	MTERF2	7.41114	6.64678	5.56593	7.82164		0.640451
	KAZALD1	12.9776	11.0747	7.21242	11.5738		0.632894
	4833413G10RIK	5.93812	5.89265	4.85127	6.78502		0.631521
	ZFP395	53.2731	50.716	40.7658	57.5993		0.629625
	ZFP938	5.50608	5.54774	6.73105	7.72456		0.629098
	ESYT3	17.7482	18.5467	12.6744	19.6266		0.628632
	GM20300	21.7378	21.8559	25.0318	29.3625		0.62623
	GM37249	4.05184	3.0895	2.41023	3.42371		0.622525
	TOB1	39.7251	46.2224	42.0804	54.965		0.62246
	NADK2	17.5858	17.1057	16.856	21.0482		0.619764
	NMRK1	5.96917	5.81395	4.38362	6.31255		0.619026
	DPYSL2	100.728	115.515	128.663	150.874		0.617887
	NRADD	10.4982	11.1777	11.7759	14.1547		0.616666
	RIDA	10.2396	9.90195	8.7523	11.5008		0.616526
	FGF11	16.0829	15.9115	12.6453	17.5802		0.615622
	ARL5B	30.4954	36.5542	36.1853	44.7565		0.615299
	MEOX2	23.686	24.3312	18.6513	26.3722		0.613556
	TLE6	11.806	11.2965	10.0694	13.098		0.613034
	IGIP	34.1976	37.3618	37.6833	45.6663		0.608518
	6330403K07RIK	3.78158	3.44996	2.30835	3.49714		0.60732
	CBX8	7.89707	7.8901	5.77962	8.29307		0.606675
	GPM6A	43.3997	46.5115	48.9421	57.5811		0.603236
	WNT7A	14.2102	17.2666	12.233	17.7789		0.602681
	SHROOM1	5.41562	5.8416	4.34709	6.13817		0.602449
	CAMSAP3	31.1317	30.8986	27.7329	35.2875		0.601853
	GM7598	1.48184	1.44418	0.856738	1.38155		0.600433
	PARP16	10.5437	10.6455	8.56294	11.5323		0.600378
	BNC1	6.71098	5.84894	4.2754	6.06134		0.59869
	IER3	164.873	153.926	123.765	166.208		0.598537
	GM46430	19.1779	18.319	17.741	21.4791		0.595649
	FOSL2	73.8111	92.9064	87.6865	107.386		0.594631
	SCRN2	11.1979	10.2134	9.14756	11.4627		0.592051
	GM20707	3.26412	2.8071	2.11749	2.90667		0.590238
	DUSP14	38.1111	36.9611	35.2881	42.6337		0.590093
	SLC35D2	9.37515	8.25935	7.28058	9.14772		0.588659
	LRIG3	20.0672	18.0703	11.956	17.6498		0.587813
	CYP39A1	23.4181	22.3817	20.0703	24.9326		0.587313
	CEP70	21.093	18.5336	14.9987	19.6177		0.585039
	LRRC20	22.1116	22.2068	20.7551	25.0762		0.583684
	KCTD7	14.9728	14.7241	11.0567	15.0408		0.583412
	0610009L18RIK	3.71193	4.11612	2.88479	4.06667		0.580877
	SOX11	29.0787	31.7611	20.1379	30.1152		0.580264
	A930001A20RIK	1.46032	1.4665	0.598659	1.19758		0.579897
	SPTSSA	45.6926	49.3105	51.2901	58.2621		0.579143
	PDE9A	43.0046	40.123	34.7122	43.3227		0.578908
	1810010H24RIK	43.1785	46.6784	41.4792	51.0071		0.578591
	ZFP64	18.237	19.2915	17.0517	20.9465		0.576353
	DCDC2B	7.39012	6.25997	4.84045	6.39703		0.576287
	SLC22A17	40.349	40.5269	35.2439	43.6286		0.575797
	GPSM2	21.069	23.6869	21.0664	25.6976		0.574207
	DGKE	33.4969	32.2677	28.1512	34.6784		0.573966
	NQO2	34.8156	35.3513	32.6788	39.0334		0.573767
	XKR6	5.9255	6.30367	5.29482	6.65354		0.573656
	ADI1	41.588	40.3535	37.039	44.3264		0.572748
	ZFP707	16.2024	15.8977	15.1592	17.7864		0.572702
	MMP11	54.4999	55.2277	47.021	58.4294		0.571444
	ABHD18	9.85774	8.71549	7.07722	9.00628		0.570281
	SIX4	11.3698	10.414	6.54476	9.65405		0.569267
	AASS	8.72763	9.68715	8.12089	10.1295		0.568814
	ZFP770	10.4978	11.1095	8.39688	11.0928		0.568674
	BLOC1S5	19.125	18.3595	16.4217	19.76		0.568122
	ADAMTS1	120.734	171.237	143.537	178.545		0.567217
	CRNDE	11.6113	11.6584	9.41057	11.9097		0.565273
	ADRA1A	20.6177	19.0876	13.4314	18.3496		0.564274
	HHEX	25.6628	26.6812	20.7842	26.7636		0.563856
	MYCT1	79.543	87.8847	68.2373	87.7048		0.561771
	MSL3L2	18.6847	16.3886	15.9379	18.1423		0.561224
	FGF7	23.1102	24.3908	22.4042	26.203		0.559952
	ALDH5A1	21.132	17.879	10.8203	16.0685		0.559891
	PTPDC1	18.5508	18.6609	13.6598	18.085		0.55955
	RNF144B	54.6829	52.8931	38.4539	51.026		0.558595
	FHIT	1.89196	1.96119	1.16494	1.74188		0.5572
	RELN	9.55542	8.95109	7.34439	9.07365		0.55682
	APPL1	41.423	42.7538	38.9494	45.4705		0.556533
	RGS3	116.282	108.461	85.3869	107.88		0.556521
	SLC38A6	20.2642	19.1773	17.001	20.1241		0.556247
	GREM2	115.866	114.968	92.3059	115.233		0.555943
	PRR5L	41.5875	44.3245	34.4921	43.7973		0.555686
	AHR	108.221	100.272	62.9629	90.3781		0.553668
	ZDHHC14	17.6618	17.7935	16.5617	19.0205		0.553644
	RBM12B2	22.4055	26.0907	22.9833	27.1362		0.552964
	RGS11	37.6199	38.3118	30.8579	38.2357		0.552781
	DCDC2A	9.82127	9.1743	4.73787	7.68415		0.552332
	IRF9	73.3362	73.851	202.944	152.583		0.551249
	MEIS1	68.9033	72.5709	64.2386	75.3018		0.550413
	RASSF3	218.367	239.706	194.892	238.886		0.549671
	GATA3	14.1629	15.6187	12.1831	15.2816		0.549661
	RHPN2	19.7761	22.0708	18.6381	22.3642		0.549369
	SNX18	62.9366	72.6999	66.1805	76.2531		0.549056
	FAM3C	52.5572	54.5252	54.1384	59.4483		0.547086
	TMEM50B	132.898	142.681	126.686	147.357		0.547051
	TAL1	25.7769	29.2313	24.7322	29.5095		0.546842
	TATDN3	9.8156	9.63531	8.02389	9.65217		0.54658
	FBXO45	29.6454	32.6264	28.2957	33.2818		0.546302
	KCTD17	24.965	23.7691	37.512	33.4769		0.546285
	NEMP2	18.3572	16.0364	12.7414	15.7106		0.545927
	FBXL4	22.7959	23.2318	20.014	23.5841		0.545351
	ERO1B	38.3148	38.547	34.7077	39.8579		0.5441
	P2RX6	18.8426	16.551	10.1502	14.5215		0.543851
	MAPK12	46.8812	45.1207	38.4335	45.4228		0.543633
	2610008E11RIK	31.1225	33.581	26.2228	32.4698		0.542938
	PAQR8	40.1517	42.8298	32.9977	41.1398		0.542545
	SMAD9	15.1921	15.741	9.75836	13.7544		0.539401
	GM16091	2.89085	3.68549	1.36951	2.72589		0.539246
	CDKL2	24.4147	26.7521	22.0572	26.2798		0.538419
	TTC41	6.00612	6.02361	4.23873	5.50075		0.536014
	EBPL	11.3058	10.5203	7.28505	9.54323		0.535975
	DPY19L4	30.9098	30.7596	24.903	29.7881		0.535155
	TRIM34A	46.3408	45.3617	127.575	92.5273		0.535034
	B130024G19RIK	18.5249	16.8451	10.2227	14.4783		0.534889
	CDKN1B	79.3557	79.4136	70.7052	79.9962		0.532886
	IRF2BPL	87.3549	84.3064	140.814	119.84		0.532339
	PLK2	94.4583	115.052	75.9731	101.593		0.53183
	ABCA8B	31.6095	34.2798	28.6815	33.453		0.531327
	EPB41L4B	76.3428	80.7035	66.0629	77.8541		0.530463
	CLK1	190.982	223.016	189.218	218.489		0.530012
	VSIG10	46.3206	44.7367	35.7337	42.4982		0.528123
	FOXP1	133.318	138.183	106.159	128.84		0.527291
	SLC35E3	45.233	41.9663	32.9845	39.475		0.526679
	GM6548	16.359	17.537	56.1569	38.798		0.526476
	RTP4	29.8336	30.4328	168.348	104.652		0.526469
	ZFP846	12.791	12.6389	9.87717	11.8193		0.52493
	KCNJ2	18.7084	33.3088	18.6855	27.2783		0.52464
	ZBTB1	31.5845	32.9927	27.3543	31.6501		0.524468
	GM20559	48.4775	46.4318	126.153	90.3489		0.523503
	TSPYL4	38.2619	41.4524	32.2653	38.5092		0.522387
	SIRT5	13.732	13.1996	9.45037	11.7913		0.520588
	IQCE	35.8533	34.922	28.3725	32.9452		0.520507
	TMPRSS2	120.489	123.568	94.2531	113.243		0.51989
	SSH1	71.4612	76.6204	64.9667	73.4827		0.518993
	APOL9B	7.21668	6.29136	59.2009	33.8405		0.516711
	SYVN1	67.1783	66.6484	98.0929	85.1228		0.516706
	BMP4	88.5163	88.7943	70.8412	82.451		0.516496
	OAS1B	10.524	9.16335	43.7136	27.3077		0.516439
	METTL7A1	1039.22	1043.01	858.153	979.487		0.515205
	H2-T24	31.7547	32.4353	76.3844	56.0593		0.515157
	EPHA1	40.6197	46.5078	33.2338	40.9646		0.513716
	PPFIBP2	53.5641	56.9043	40.4184	49.9276		0.513011
	SAMD5	26.1327	27.5374	19.1723	23.9609		0.512974
	SH3RF2	48.0249	53.6814	34.5712	45.2512		0.512746
	MAP2K1	66.6345	64.8164	96.2779	82.5755		0.512591
	IFIT3B	26.4258	22.9438	377.712	205.228		0.512229
	MARK1	5.89548	6.44397	11.2393	9.05666		0.51216
	CMPK2	28.1686	27.9122	224.39	129.058		0.511521
	TCIRG1	84.8393	80.3388	161.086	123.325		0.510823
	PNP	65.2797	67.2476	160.472	116.265		0.510562
	TRIM30A	44.3654	41.9698	192.668	119.675		0.510041
	GPD1L	82.7495	81.0561	68.6922	76.332		0.509735
	TNFRSF12A	16.5062	23.7228	43.2768	34.1292		0.509393
	USP18	21.1799	21.6534	189.13	107.233		0.508735
	XAF1	36.041	36.3331	166.451	103.142		0.508631
	TOR3A	88.0969	90.3674	211.856	153.719		0.508628
	SMTN	69.5521	71.4498	91.5564	82.8533		0.508283
	PTCH1	117.353	112.974	74.0638	95.0163		0.508007
	PARP14	117.339	117.831	346.99	236.024		0.507774
	PARP9	52.8098	52.6225	170.782	113.387		0.50754
	TCIM	40.0377	41.6715	63.9014	53.58		0.507517
	IFI44	12.0343	12.096	185.299	99.9627		0.506409
	RNF114	106.714	109.758	201.449	157.458		0.505959
	APH1C	16.9186	17.5182	11.6343	14.7403		0.505628
	IFI35	52.0077	53.2221	137.393	96.37		0.505575
	RARA	66.7417	64.0322	87.764	76.7394		0.505542
	ITGA5	63.8238	72.2802	103.452	88.7773		0.505185
	ZC3H6	13.9461	12.0343	5.63778	8.91937		0.504716
	UBE2L6	37.3361	39.6583	154.694	98.0579		0.504536
	TOR1AIP2	125.376	130.437	219.334	176.456		0.50449
	PDLIM5	78.5121	76.7115	106.408	92.3279		0.504195
	RASL11B	24.174	22.9938	35.3495	29.4159		0.504186
	NAMPT	66.4064	64.3364	142.982	104.473		0.503928
	FURIN	143.746	148.415	192.701	171.819		0.503695
	PHC2	111.921	116.827	170.517	144.551		0.503058
	IFI203	76.2779	73.2062	194.851	134.481		0.501687
	GLP1R	251.788	279.738	180.598	230.662		0.501073
	PHF11D	33.2632	33.3233	206.661	120.235		0.501014
	DCP2	39.502	41.0477	65.4272	53.3429		0.500991
	DENN2B	167.411	182.333	133.828	158.391		0.500982
	TRIOBP	49.2555	49.8397	70.8575	60.4579		0.500906
	EFNB1	122.226	132.267	199.6	165.787		0.499558
	PARP12	81.4166	82.1361	218.931	150.313		0.499269
	TBC1D30	49.4829	53.5125	34.9416	44.148		0.499107
	SF3A2	39.5639	39.2534	52.4628	45.7569		0.498896
	GRN	243.672	245.384	396.763	320.14		0.498547
	CSK	85.9608	84.5115	106.772	95.3035		0.498232
	GDNF	13.0764	18.2317	9.67993	13.9059		0.498212
	OGFR	55.1488	54.9016	120.056	87.0471		0.497533
	TRAFD1	110.724	108.906	247.141	177.144		0.497529
	SZRD1	117.304	121.01	145.921	132.767		0.497381
	EIF4H	359.649	378.582	440.977	406.975		0.496578
	STK4	162.393	171.893	109.973	139.964		0.49656
	HAP1	21.0874	22.3113	72.2457	46.9182		0.49619
	PPA1	11.9144	11.5033	34.5054	22.8184		0.495958
	AI837181	42.026	41.3637	59.2338	49.8905		0.495942
	LGALS9	109.062	114.068	387.498	248.569		0.495586
	MKNK2	200.038	199.673	256.242	225.929		0.495552
	PARP10	51.431	49.8993	123.073	85.7161		0.495549
	DHX58	15.1662	14.329	92.1874	52.7412		0.495147
	PARP11	22.6389	21.8984	46.4052	33.8151		0.49507
	DBNL	92.8722	92.4872	127.014	108.632		0.494905
	RIGI	81.1138	83.3753	229.221	154.624		0.494646
	STK40	78.2618	85.9543	113.514	98.6344		0.494487
	SLC25A22	31.9888	31.843	91.6486	61.0595		0.494443
	PIK3C2B	29.1692	30.4764	21.3131	25.6047		0.4944
	VARS	76.7144	71.9633	107.633	88.6759		0.493751
	OASL2	85.4445	83.4289	710.557	391.645		0.493264
	MUC1	283.105	294.149	430.714	357.381		0.493032
	SEMA7A	76.2023	77.0761	132.938	103.477		0.492715
	LAP3	35.2478	34.9346	63.4346	48.399		0.492014
	STAT2	99.2656	93.0134	327.34	206.533		0.491331
	SP100	132.726	127.541	324.867	222.244		0.491247
	TRIM30D	19.8356	20.272	99.4112	58.792		0.49123
	MITD1	12.6174	13.0199	31.3361	21.7823		0.49108
	TDRD7	54.3345	57.6507	104.755	79.6177		0.490238
	PTPN1	109.375	106.939	135.674	118.877		0.489985
	ISG15	11.3572	10.6989	290.664	147.513		0.489486
	SDC3	236.563	231.534	381.554	300.077		0.489451
	MYD88	54.3496	53.6038	99.1995	74.7648		0.489288
	MUC20	14.0822	14.3922	24.0047	18.7853		0.489241
	TSC22D1	238.16	259.929	316.445	281.957		0.489192
	GBP3	49.2465	45.9098	214.463	127.361		0.489147
	CSNK1D	157.384	167.808	193.11	176.473		0.488955
	ENSMUSG00000034575.14	26.5226	28.449	55.2023	40.8588		0.488441
	ANKFY1	89.5116	88.9138	131.024	107.38		0.488231
	MAPK7	37.2036	38.8521	47.4998	42.1586		0.488218
	LY6E	1245.57	1249.86	2921.29	2035.85		0.488079
	MAP3K5	56.259	58.4967	47.9283	51.9252		0.487905
	GM5431	4.79257	4.22568	31.3944	17.356		0.487254
	SRPR	156.144	167.167	192.615	175.286		0.487202
	TAPBPL	45.8426	46.2644	72.9927	58.074		0.486965
	RNF31	48.629	46.4937	82.524	62.7846		0.486636
	ATP1A1	533.014	528.361	597.919	548.074		0.486624
	WBP11	64.1042	64.3585	79.1917	69.8491		0.486583
	ST14	47.424	49.9517	69.2077	57.9464		0.486293
	TAPBP	297.948	309.548	572.137	428.297		0.485771
	ZC3HAV1	94.7222	95.7465	153.934	121.244		0.485595
	CMTR1	91.272	87.0812	129.355	105.034		0.485288
	PPP1R16B	154.514	177.363	120.245	144.383		0.485143
	CHMP4B	141.518	144.845	223.278	178.58		0.485111
	MED15	74.102	71.4703	91.2954	78.9487		0.485045
	CHERP	73.3154	71.5892	85.741	76.3106		0.485035
	ATP13A1	59.6655	61.2329	73.1378	64.9923		0.48368
	STARD3	57.5218	60.0401	81.8054	68.5418		0.483214
	LIMK1	24.2925	26.2821	34.3815	29.2923		0.482865
	PXK	70.2969	65.2314	93.8376	76.7104		0.482246
	TRIB2	80.5302	103.114	114.53	104.807		0.481553
	SEC24C	162.787	160.086	170.618	159.134		0.481196
	IFIH1	47.8552	49.2251	152.008	96.8163		0.481116
	ADAR	89.838	88.5757	202.235	139.887		0.481024
	OSR1	12.3851	9.50963	15.2351	11.8969		0.480786
	DAXX	37.1189	38.4383	116.277	74.3549		0.480593
	OPA3	40.0601	42.0298	50.839	44.6278		0.480547
	RANBP3	67.0817	64.5329	74.0158	66.5605		0.480412
	SPATS2L	21.5414	24.4331	47.476	34.5412		0.480345
	IFITM3	306.276	325.804	1039.09	655.195		0.480033
	SERTAD2	87.4912	94.4398	66.1788	77.0799		0.479894
	GM7353	9.85749	8.87977	13.0597	10.5278		0.479858
	ARFGAP2	77.8612	76.5831	85.0123	77.5283		0.479768
	DDX24	94.0095	93.2797	133.119	108.606		0.47971
	RNF213	151.078	148.633	617.042	367.199		0.479576
	PHF11B	7.2788	6.61595	35.4855	20.1874		0.479495
	BYSL	17.9824	19.8121	26.74	22.2934		0.478891
	MNDAL	65.3139	62.6869	140.286	97.1079		0.478427
	PML	66.2278	62.6509	149.244	101.289		0.478013
	PSMB10	52.0964	53.6956	100.599	73.7365		0.477895
	ZDHHC5	90.9786	92.1346	99.3627	91.4932		0.477778
	WHAMM	32.3835	29.7642	40.8918	33.7145		0.477163
	PLAUR	34.0827	39.9857	55.8601	45.7184		0.477
	NUFIP1	9.42683	9.5516	11.929	10.2449		0.476938
	HERC6	22.5566	23.3664	106.886	62.1199		0.47692
	ZFP384	71.3969	72.1676	84.3563	74.6336		0.476819
	S1PR1	266.787	346.713	515.562	410.781		0.476392
	PNPT1	15.1309	15.9713	31.1404	22.4266		0.476031
	NELFA	27.6683	27.9775	32.7241	28.8888		0.475915
	TIMM23	36.0448	36.1717	45.6215	38.9196		0.475829
	AARS	87.9036	88.0754	107.495	93.0568		0.475822
	DTX3L	56.951	50.7704	128.626	85.3341		0.475672
	1600014C10RIK	25.15	24.2646	47.5649	34.1357		0.475232
	QRICH1	79.4892	79.608	85.9936	78.6758		0.475091
	FIZ1	31.0615	32.5407	37.1751	33.1052		0.474859
	BCL7B	39.8534	43.2062	53.3942	45.8687		0.474829
	SAMD4B	88.4587	92.7972	111.227	96.8301		0.4746
	CGN	155.648	159.465	105.316	125.642		0.474514
	UBAP2	65.0578	63.5979	67.7904	62.3184		0.474307
	TREX1	14.0959	13.0201	60.0134	34.6338		0.474219
	FLNC	12.8286	12.5914	22.7249	16.746		0.474173
	OAS2	20.4033	19.2952	128.532	70.0939		0.474161
	AEN	30.3413	30.0068	43.724	34.9341		0.473806
	EIF6	41.8793	44.0236	57.0535	47.8837		0.473734
	UBA7	110.298	105.038	218.678	153.329		0.473652
	EIF2AK2	34.5215	33.3834	102.86	64.4552		0.473088
	TBC1D10A	35.4546	39.591	45.869	40.4128		0.472886
	MLH3	23.5334	23.8273	14.6408	18.1878		0.472804
	SHISA5	331.479	315.197	616.371	440.285		0.472628
	PLEKHA4	8.61335	7.86088	34.0643	19.8027		0.472334
	SRCIN1	29.8103	28.3486	18.6354	22.1692		0.471845
	H2-T23	258.687	249.861	637.199	418.382		0.47165
	CCDC86	13.7638	13.5092	20.9981	16.2693		0.471473
	SLC25A28	54.5527	51.2818	60.2223	52.5675		0.47144
	NPLOC4	68.2674	68.0265	79.4601	69.5184		0.471354
	MOV10	29.0518	30.3348	59.7934	42.4609		0.471118
	PLEKHG2	76.3301	87.2636	102.665	89.32		0.470281
	ART3	25.7583	25.5756	33.7115	27.8776		0.470213
	TARS	39.6365	40.7254	46.4905	41.0065		0.470173
	ORAI2	39.9993	35.9242	41.6486	36.467		0.4701
	BIRC2	46.4542	45.9117	58.8214	49.2017		0.469782
	CCDC6	56.851	57.2597	67.0332	58.3868		0.469751
	CDKN1A	54.8611	58.0871	159.95	102.4		0.469643
	DCK	12.4039	11.5057	27.266	18.1974		0.469347
	PPP1R18	79.8378	86.276	109.94	91.9602		0.468669
	BST2	57.093	56.2964	299.81	166.849		0.468535
	ZC3H3	21.9333	21.0602	29.1451	23.5226		0.468528
	AKT2-PS	12.325	12.0645	13.4719	11.9565		0.468213
	POLRMT	23.7513	23.4535	28.0479	24.1117		0.468177
	BOP1	29.3028	30.029	39.752	32.6416		0.467772
	GATA2	139.001	148.198	234.043	178.772		0.467693
	URGCP	53.2882	55.0124	61.5237	54.4874		0.467558
	ABTB2	9.31116	8.62356	16.1658	11.5825		0.467237
	OAS1G	3.00868	3.03987	41.0261	20.5633		0.466648
	PLEKHM2	57.5227	56.4964	65.0016	56.6319		0.466113
	APOL9A	3.17102	3.06276	36.5346	18.447		0.465865
	FBXO34	24.1693	25.3655	28.3782	25.0362		0.465845
	ISG20	32.8117	33.7541	106.894	65.4074		0.465044
	PSME1	129.097	129.307	203.807	154.828		0.464788
	OAS1A	12.9302	13.201	114.82	59.4994		0.464762
	TRIM12A	36.2913	36.2421	70.956	49.8126		0.464679
	HSH2D	3.81274	3.09711	10.0146	6.08884		0.464382
	CCDC25	26.3941	26.9204	37.9132	30.1005		0.464273
	OASL1	4.69493	3.79185	90.6062	43.8109		0.464108
	TRIM26	90.2051	85.6656	106.238	89.0535		0.464052
	RIPK1	49.396	51.4785	57.2824	50.4427		0.463794
	AFTPH	76.1029	80.2265	93.6268	80.4955		0.463008
	TOR1AIP1	162.15	167.129	262.052	198.509		0.46253
	ALPL	4.697	4.53174	14.3324	8.71667		0.462076
	GPAT4	68.3734	71.3851	75.2099	67.7098		0.461883
	SORBS3	203.505	223.674	292.312	238.285		0.461806
	STAT3	239.961	244.905	302.835	252.888		0.461693
	KSR1	32.3571	31.7661	39.3458	32.7617		0.460706
	RGS2	169.97	73.8777	100.002	79.9852		0.460002
	PRR3	19.1207	20.1383	24.2512	20.4111		0.459818
	PITPNM3	85.7455	87.9135	52.5936	64.4566		0.458743
	ZC3H4	109.7	105.523	99.9556	94.2425		0.458649
	NMI	22.7974	23.3203	42.6868	30.2433		0.458183
	MS4A6B	20.0828	16.5658	46.4135	28.8523		0.458124
	FFAR4	11.1823	11.2805	19.7111	14.1973		0.458102
	UBAP2L	167.094	166.793	164.76	151.871		0.458058
	CISH	61	62.0816	89.9591	69.5479		0.45743
	PIM1	49.5135	36.8982	87.6317	56.9379		0.457222
	OSMR	79.6826	81.5139	119.381	91.7978		0.456944
	CUL9	42.1238	40.8056	28.5216	31.6336		0.456294
	FGL2	41.7276	38.5118	71.7152	50.2872		0.456215
	DDX27	31.5212	30.1827	33.5634	29.0375		0.455517
	LGALS3BP	199.397	187.428	942.397	513.781		0.454744
	DTX2	19.1733	20.6504	25.1813	20.8218		0.454309
	GADD45G	17.0813	11.2287	40.0868	23.2846		0.453754
	SEC14L1	218.155	251.824	259.694	231.707		0.452979
	BAIAP2	60.1587	60.6183	66.8153	57.6508		0.452399
	IFI209	28.68	25.2133	83.411	49.1161		0.452165
	ZHX3	65.5419	64.6534	68.8391	60.3511		0.452093
	GM11560	8.59064	8.70375	9.99329	8.45226		0.452064
	SLFN2	49.1933	46.7691	112.133	71.8127		0.451931
	IRF2	76.1414	78.2686	101.102	81.011		0.451641
	CYTH1	56.5973	55.3861	66.2331	54.9066		0.451464
	SAMHD1	343.016	335.129	491.443	372.852		0.451082
	MUC4	49.9669	42.8457	86.661	58.3314		0.450412
	EIF4ENIF1	65.5	64.5162	74.5042	62.607		0.450344
	ZCCHC2	40.4826	40.6538	63.2401	46.7444		0.449925
	ZNFX1	135.901	133.39	302.332	195.971		0.449761
	STING1	27.3291	27.1754	42.2551	31.2051		0.449444
	CTDP1	32.022	32.7718	37.8168	31.7223		0.449397
	JDP2	28.3866	31.5229	39.5131	31.9178		0.449318
	RAPGEF3	73.0739	78.0898	94.2313	77.403		0.449179
	SAFB	116.187	116.48	118.041	105.329		0.449123
	AREL1	65.1128	63.9592	70.1433	60.2203		0.449062
	XPO6	74.604	72.0446	72.8852	65.0803		0.449047
	ADAMTSL2	58.2986	75.6041	115.643	85.8707		0.449005
	BC147527	2.87919	2.14477	7.34575	4.25585		0.448432
	NT5E	147.007	152.323	102.604	114.227		0.448079
	USP10	47.7559	47.653	53.8892	45.4271		0.447372
	RNF216	70.6123	67.3389	68.6505	60.8156		0.447208
	LARP1	148.28	146.79	150.717	132.952		0.446887
	SNAI1	21.2627	19.1814	32.3071	23.0011		0.446723
	IFI206	11.8765	13.5691	51.9339	29.2615		0.44672
	FEM1A	63.6812	65.5324	63.7667	57.7251		0.446446
	ADIPOR2	197.214	202.806	212.626	185.367		0.446203
	SUSD6	206.641	219.459	227.826	199.568		0.446177
	ANKRD17	83.5034	80.1506	90.8391	76.2701		0.446051
	SF3B3	99.014	99.5525	104.113	90.7719		0.445692
	CREBBP	68.7522	66.5376	66.7679	59.4071		0.445646
	CNKSR3	19.1734	20.0698	24.8662	19.9691		0.44439
	B4GALT4	46.6543	51.5945	63.8994	51.2821		0.444024
	MISP3	23.177	24.0411	12.4774	16.2119		0.443936
	SLFN5	189.684	189.792	286.138	211.214		0.443791
	SLFN9	5.69946	5.02887	33.3093	17.0062		0.443584
	APOBEC3	84.5308	77.416	113.305	84.5646		0.443394
	NOCT	12.5153	14.1062	23.3458	16.5838		0.4428
	LFNG	58.1897	48.2087	65.1844	50.2072		0.442771
	PRR15L	54.995	67.3452	94.712	71.5939		0.441782
	ELL2	27.4942	30.1039	33.4021	28.0551		0.441771
	VCAN	6.65902	7.56329	23.7938	13.8523		0.44176
	HERPUD1	153.05	168.068	201.969	163.348		0.441437
	TBK1	47.8369	46.9169	53.8496	44.472		0.441337
	RCSD1	111.309	118.068	133.375	110.936		0.441195
	PNPLA2	150.755	147.901	214.61	159.647		0.440393
	SLC39A14	27.3344	28.5156	40.967	30.5807		0.44012
	IARS	44.2292	44.6033	51.4186	42.2351		0.439849
	MXD4	286.846	311.505	316.785	276.349		0.439843
	PEX11A	21.1365	22.0649	27.7836	21.9245		0.439823
	IFI27L2A	35.3586	31.858	198.361	101.192		0.439546
	TMEM120A	11.1327	11.0571	15.2106	11.5457		0.439539
	D730005E14RIK	5.18236	4.21453	8.79478	5.70492		0.438525
	FAS	40.4421	44.0998	53.1989	42.6579		0.438423
	PIWIL4	4.83305	4.65498	10.2546	6.53558		0.438347
	NHLRC1	5.11614	5.17257	7.73604	5.65773		0.438291
	FBXO42	40.4824	40.7116	38.5341	34.5715		0.436258
	HELZ2	201.865	192.969	340.728	232.823		0.436245
	AIFM2	28.3937	25.4103	29.6684	23.9833		0.435437
	SMG7	79.2518	79.0884	85.1829	71.4968		0.435236
	SLC10A6	14.36	24.7227	46.1829	30.8575		0.435192
	NUP98	72.0544	72.0616	81.4023	66.6922		0.434579
	KIRREL	53.4779	52.9144	49.4084	44.446		0.43437
	R3HCC1L	35.6654	35.4632	35.7411	30.9224		0.434277
	SPSB1	24.9589	27.0743	46.0092	31.6126		0.432555
	PHRF1	82.6817	83.6729	76.7263	69.3456		0.432331
	KLF13	176.645	198.986	240.569	190.021		0.432302
	CDC42EP4	137.994	158.202	236.061	170.418		0.432244
	CTPS	31.4749	35.4539	54.9084	39.0181		0.431797
	ETV6	57.0265	54.8036	58.6181	48.9694		0.431747
	SGMS1	92.1953	97.1955	121.553	94.3256		0.431205
	GMEB1	25.1821	24.0031	24.3418	20.8024		0.430293
	GEMIN5	21.2974	19.592	19.3075	16.7339		0.430184
	SLA	42.2701	40.2232	50.3822	38.9711		0.430119
	DDX21	71.5635	74.0001	78.2719	65.3072		0.428886
	ZBP1	15.9134	12.5311	147.559	68.5851		0.428416
	MCF2L	74.3595	71.5644	75.33	62.9068		0.428245
	RLF	38.9425	35.9123	34.29	30.0009		0.42735
	MBD1	89.0531	95.1328	121.431	92.526		0.427246
	IFIT1BL1	7.08842	6.77149	64.86	30.6035		0.427236
	RNF24	13.8301	13.334	13.7066	11.5516		0.427194
	TMC7	2.90761	2.87848	4.31446	3.07168		0.427041
	EVA1C	10.4698	11.374	15.8895	11.6143		0.426002
	NAA25	25.4516	23.7261	30.1435	22.9034		0.425164
	SUPT6	140.239	136.44	114.891	106.796		0.424919
	IFI211	8.26079	7.70091	73.4833	34.4731		0.424628
	THEMIS2	36.4405	32.0643	53.8373	36.3939		0.423669
	HEATR6	30.7584	30.5812	27.6406	24.628		0.423003
	FUT4	9.48776	9.55261	12.9851	9.52787		0.422753
	IFI204	10.58	9.64227	72.0219	34.5042		0.422513
	SLFN8	12.5305	11.3417	62.4499	31.158		0.422244
	PHF3	104.363	103.761	86.4987	80.3024		0.422067
	ENSMUSG00000120992.1	80.9373	78.3492	234.014	131.712		0.421663
	LY6C2	20.5618	18.9477	71.6902	38.1658		0.42108
	ERCC5	41.0679	43.7925	39.5576	35.0841		0.420924
	RGCC	47.4164	53.5623	86.1082	58.7402		0.420563
	MS4A6C	15.7601	15.4593	40.2755	23.4172		0.420154
	RBMS2	63.1066	64.6975	56.6392	50.8744		0.419283
	ADAMTS15	72.9437	63.9802	74.6266	58.0341		0.418696
	FAM167A	27.7252	27.388	31.034	24.4594		0.418667
	TPCN2	22.9322	23.5466	27.4711	21.3203		0.4179
	ZFP592	88.9947	91.186	80.6181	71.7637		0.417707
	GLUL	306.156	316.718	443.509	317.029		0.417019
	GM9910	9.80418	7.96256	8.46229	6.84544		0.416774
	ENSMUSG00000120976.1	0.675141	0.607145	1.87417	1.03401		0.416718
	SH2D3C	103.842	114.911	157.134	113.287		0.416426
	TRIM14	9.77969	9.22979	17.6847	11.2074		0.416409
	SNRK	208.782	233.799	227.933	192.22		0.416302
	KDM5C	116.235	119.798	104.933	93.5246		0.416162
	DNAH6	47.8412	45.3886	19.7715	27.0714		0.41546
	MYC	9.84736	8.61278	18.9981	11.4661		0.415274
	GM26885	1.43478	1.01389	2.34517	1.39466		0.415193
	AGRN	414.96	426.025	418.458	350.164		0.414649
	TRARG1	16.1443	18.7793	30.8718	20.485		0.412579
	HES1	78.1962	64.1734	74.0205	56.9858		0.412361
	TTPAL	38.5119	43.3705	49.6685	38.3415		0.412101
	PPRC1	37.0627	40.5397	52.6225	38.3898		0.412075
	IFI207	14.6857	14.0063	56.6632	29.099		0.411762
	OSBPL11	32.2871	34.9004	31.84	27.4687		0.411576
	MS4A4C	7.70174	6.23154	36.3366	17.5173		0.411513
	FRY	57.6256	63.0214	58.11	49.8357		0.411418
	SLFN1	10.0885	8.11978	39.1004	19.4134		0.411125
	INTS6	23.5848	25.5014	29.0065	22.3931		0.410824
	GM7816	8.81098	10.6651	18.2021	11.841		0.410188
	PIK3R5	25.1553	23.2017	31.991	22.6383		0.410169
	AA986860	67.4253	95.7113	145.806	99.0351		0.410054
	FCGR1	5.92941	5.40481	31.0426	14.9334		0.409724
	IL18BP	9.97058	10.3725	35.1912	18.5923		0.408051
	EP300	106.354	103.817	92.4999	80.0894		0.40796
	TTYH1	1.57948	1.37337	2.13663	1.4304		0.407521
	MPZ	3.38372	2.74503	9.13887	4.83943		0.407226
	BHLHE40	91.1817	72.6709	107.265	73.2635		0.407164
	BAZ1A	33.3434	32.3884	35.9355	27.7961		0.406828
	HK2	24.3064	26.1723	35.277	24.9956		0.406768
	CHST8	5.09634	5.40238	6.7787	4.94913		0.406296
	GRAMD2	218.197	237.941	215.036	183.729		0.405603
	PTGER4	9.13266	7.09385	12.5852	7.97693		0.405352
	ZSWIM6	28.3353	28.7145	28.7473	23.2743		0.405039
	CTTNBP2NL	154.127	182.582	221.158	163.265		0.404381
	HEY1	75.5261	74.9564	94.6647	68.4787		0.403715
	RESF1	77.3687	96.0428	123.297	88.5421		0.403676
	RASSF2	57.5403	62.972	66.166	52.0229		0.402847
	TIMP1	4.80228	4.18471	26.598	12.3847		0.402326
	PLEKHF1	5.74998	8.84915	14.444	9.36745		0.402155
	HCAR2	10.1814	7.7432	11.5942	7.70274		0.398334
	USP54	79.6179	82.7205	73.8998	62.3056		0.397813
	KLF7	126.28	124.626	128.759	100.599		0.397021
	CECR2	15.344	14.9646	17.6605	12.9129		0.395797
	ZFP366	62.5925	67.4657	67.0209	53.2291		0.395795
	ADARB1	105.852	109.979	88.4512	78.5349		0.39578
	IRF7	35.4574	32.8341	660.797	273.96		0.394965
	LNX2	43.1862	51.2628	67.1935	46.7679		0.394812
	BCAR3	59.4188	59.2699	68.6202	50.472		0.394651
	APOL6	3.99549	3.38327	18.5011	8.56671		0.391454
	IFI205	6.62474	5.91088	55.8172	24.1067		0.39053
	LPIN2	212.013	226.219	217.334	170.836		0.385154
	SYK	94.6849	82.6127	80.8321	62.9431		0.385103
	FCGR4	9.67559	8.57501	15.8997	9.42354		0.385031
	GM4900	4.83888	4.93067	4.65746	3.68518		0.384348
	DUSP16	61.4125	69.2051	80.9385	57.6033		0.383655
	CFB	55.4	54.9	224.415	107.112		0.383482
	PDE3B	14.1594	12.4064	16.3101	10.9984		0.382998
	KLF9	154.256	188.756	238.091	163.323		0.382627
	TENT5B	12.5646	15.1387	27.6041	16.354		0.382613
	MS4A6D	5.66355	6.18187	24.1117	11.5409		0.38097
	SLFN4	7.28348	6.3663	83.4671	34.22		0.380927
	KLF10	56.548	42.2488	75.9378	44.9596		0.380412
	FAM107A	10.651	12.8838	30.8894	16.6056		0.379355
	SPHK1	40.001	43.2169	49.95	34.9292		0.37491
	OAS3	5.8048	4.65086	74.3171	29.5976		0.374806
	MLXIP	124.63	120.612	101.378	82.8763		0.373334
	PFKFB3	128.298	145.376	159.801	113.775		0.372817
	IL1RN	11.0806	11.3675	28.9819	14.9721		0.371062
	BCL2L1	104.198	123.46	197.209	118.913		0.370827
	CALHM6	1.77162	1.34729	6.06354	2.70729		0.365315
	GM15883	36.6303	30.7176	8.12419	14.1864		0.365236
	ENSMUSG00000121484.1	3.11073	2.06791	5.68141	2.82976		0.365162
	JADE2	83.9296	93.1102	98.2448	69.4667		0.363025
	APOD	10.7911	7.97002	151.59	57.6094		0.361052
	KLF15	33.9908	43.5626	71.3961	41.4237		0.360335
	SIGLEC1	23.7708	22.3244	44.0415	23.8621		0.359553
	TREML2	11.9614	10.406	15.4362	9.28267		0.359206
	STON1	72.4425	72.1823	49.5034	43.3868		0.356548
	FKBP5	17.0178	14.664	36.0515	17.9483		0.353903
	ALPK1	12.369	11.141	10.928	7.79853		0.35337
	CCL2	1.29251	0.78094	20.5259	7.50478		0.352224
	SLFN3	2.97487	2.66863	4.52215	2.4863		0.345762
	SOCS3	44.9628	39.022	168.257	71.1527		0.34327
	STAT4	6.15188	5.44848	6.91403	4.23335		0.342434
	A730049H05RIK	0.813269	0.722721	2.07655	0.952966		0.340433
	FOXO3	110.469	115.184	125.686	81.0892		0.336651
	MAP3K6	24.3508	26.8988	57.0778	28.1643		0.335382
	GM7628	1.90154	1.8449	1.95633	1.27212		0.334661
	ADAP2	15.987	16.1199	21.1013	12.384		0.332713
	STRA6L	1.54575	1.31614	2.12344	1.1287		0.328151
	TLR9	8.84061	7.18951	13.7287	6.79129		0.32466
	PTX3	1.20461	0.957037	5.8624	2.12233		0.311218
	CCL4	1.17432	0.954822	4.36976	1.6556		0.310936
	FANCI	2.39101	2.30108	2.31844	1.4336		0.310334
	HIF3A	4.99569	4.20916	5.86974	3.09805		0.30738
	ANGPTL4	42.6997	44.059	88.9687	40.1574		0.301872
	TRIM30C	0.309816	0.262397	2.43327	0.800147		0.296827
	PER2	46.5374	54.0698	46.6777	26.1907		0.259964
	GM6545	0.93898	0.700655	1.91738	0.622788		0.237884
	SAA3	7.23129	3.7547	33.7165	8.75352		0.233606
	RSC1A1	3.69031	1.82665	3.1829	0.25358		0.0506192

## Sheet: 6 dpi
Mean CPM of genes that are DEGs in BA.5+MP vs. BA.5-MP (6 dpi)	geneName	PBS_d6	+MP_d6	BA.5-MP_6dpi	BA.5+MP_6 dpi		BA5+MP/(BA5-MP plus +MP)
	HSPA1B	72.1516	78.4334	71.9523	448.81		2.98439	Synergistic induction
	HSPA1A	69.2506	77.6189	62.6808	344.805		2.45763	Synergistic induction
	NR4A1	150.068	122.718	80.2525	273.069		1.34536	Synergistic induction
	CXCL5	2.14122	1.42813	0.603525	2.46824		1.21489	Synergistic induction
	CXCL1	1.3703	0.813355	0.838005	1.63908		0.992561
	ATF3	14.02	18.3953	19.3946	37.2392		0.985428
	HAS1	1.11749	1.59097	1.76106	3.2415		0.967027
	RGS16	1.19238	1.43977	1.86712	3.14238		0.950255
	EGR3	5.75339	6.93409	5.39718	11.2726		0.914146
	CCN1	338.411	285.777	160.915	405.321		0.907385
	NR4A2	8.9788	9.04489	10.468	17.5311		0.898437
	KLF2	116.965	185.293	163.37	303.214		0.869647
	AGTR1B	0.891749	0.746921	0.585047	1.12119		0.841757
	COQ10B	17.0028	19.9924	27.4949	39.5397		0.832637
	HLX	27.6119	32.2177	31.5091	52.1185		0.817843
	KCNE4	15.2804	11.8974	12.0128	19.5418		0.8173
	PTGS2	13.9765	11.5219	10.3655	17.4164		0.795726
	SIK1	101.306	107.879	106.697	166.03		0.773757
	GM17971	0.984634	1.04711	0.710534	1.34647		0.766062
	TNFSF9	4.84993	4.65168	4.37386	6.91321		0.765961
	P2RY10	7.98358	6.69496	8.89652	11.918		0.764392
	PTCH2	7.47191	6.30987	6.25059	9.5306		0.758778
	SLC25A25	32.4503	38.2717	37.0258	57.0881		0.758166
	ZFP944	8.60652	7.2663	9.04385	12.3621		0.757937
	GATA5	17.2378	16.5092	15.2638	23.8281		0.74995
	GM43857	5.03854	5.35887	5.20051	7.90497		0.748621
	GM4924	3.06463	2.95426	2.29265	3.90335		0.743934
	RRAD	11.0382	8.90429	11.2621	14.6433		0.726124
	ZFP943	17.2337	15.5832	16.4504	23.1839		0.723735
	KCNJ2	22.7613	26.113	16.8123	30.6069		0.713027
	ZFP820	4.75944	4.34279	3.58705	5.60326		0.706604
	1110038B12RIK	7.37949	7.49561	8.18204	11.0445		0.704475
	GM51425	5.39472	5.37458	5.61242	7.73662		0.704161
	ZFP960	6.83198	5.41276	5.21777	7.45119		0.700924
	GM47467	4.18716	3.66245	3.44234	4.92084		0.692609
	STK17B	45.9451	44.1542	54.2137	67.8916		0.690181
	ZFP36L1	330.795	286.82	280.92	390.819		0.688376
	ZFP975	9.11273	8.84777	7.7999	11.4518		0.68789
	NRARP	46.9075	50.1051	44.6177	64.8925		0.685078
	ZFP52	7.89104	7.86544	8.50475	11.2065		0.684567
	PHLDA1	53.6931	52.6566	60.0165	76.9818		0.683231
	ZFP677	5.87537	5.22214	4.71886	6.7688		0.680897
	KLF4	101.357	165.473	172.273	229.292		0.678889
	CREB3L4	2.75621	2.89066	2.10712	3.3788		0.676061
	GATA3	15.714	15.4369	13.4211	19.4075		0.672515
	TET1	7.37345	6.65263	4.30684	7.34937		0.670596
	LRIF1	20.5645	18.6148	16.6785	23.62		0.669249
	GNG5	64.8747	59.4	69.3839	85.7448		0.665803
	4732496C06RIK	7.14297	6.88118	5.72607	8.39182		0.665635
	ZFP429	7.02314	6.98714	6.63629	9.05431		0.664613
	DUSP5	13.0825	12.7914	12.8534	17.0294		0.664049
	GTF2A1	38.6499	37.5919	37.2064	49.2742		0.658762
	TOB1	42.0883	44.93	44.2414	58.6812		0.658072
	GM42528	9.67001	9.81775	9.41245	12.615		0.655997
	CNR1	5.31357	4.23004	2.55699	4.45132		0.655857
	ZFP58	8.47388	8.19295	7.47211	10.2618		0.655077
	BTG2	277.601	251.665	195.539	292.928		0.655022
	HHEX	25.0044	25.307	20.0607	29.697		0.654584
	AP3M1	83.0134	81.3864	99.1292	117.991		0.653634
	OGN	317.206	289.016	305.521	387.732		0.652158
	CASS4	19.5514	19.8809	13.1164	21.4945		0.651403
	SPRY4	34.0467	39.907	36.1232	49.4326		0.650171
	TIFA	11.1362	9.92817	9.28355	12.4162		0.646285
	CBX4	38.6325	37.4461	40.1194	50.0919		0.6458
	FOSL2	78.2545	90.6795	65.8394	100.836		0.644239
	ARL5B	35.0185	37.5069	30.8838	44.0384		0.643924
	LPAR6	17.8231	15.7398	14.8633	19.6743		0.642887
	BCAP29	21.306	19.4429	17.8877	23.9549		0.641695
	MEOX2	24.8879	23.7364	20.4924	28.367		0.641369
	ZFP874A	14.0356	13.716	12.0756	16.54		0.641292
	HIC1	31.074	28.8618	26.0886	35.106		0.638868
	UNC5C	13.1964	12.7748	12.2233	15.9651		0.63865
	BET1	21.7003	20.6768	21.4572	26.7346		0.634515
	ZFP976	11.2407	10.4797	9.51132	12.6747		0.63402
	HNMT	13.192	12.7343	12.6406	16.0757		0.633526
	LYSMD3	18.664	16.5876	14.1702	19.4608		0.632712
	DPYSL2	115.535	122.449	121.1	153.925		0.63201
	TENT5A	19.7895	19.6045	17.6955	23.4798		0.629486
	ALG6	11.0098	10.535	8.52007	11.9876		0.629105
	CEPT1	55.3186	52.0367	57.2939	68.6171		0.627612
	SCOC	31.9328	30.4326	30.7018	38.3324		0.627018
	TGIF1	23.0627	22.5964	23.0752	28.6353		0.626982
	TMEM161B	11.5529	11.3607	11.96	14.5767		0.625053
	BTG1	127.038	122.124	141.906	164.958		0.62477
	0610009B22RIK	9.05538	8.7811	8.59347	10.842		0.624013
	CSRNP2	9.00148	9.34685	7.49214	10.453		0.620764
	CASP3	20.6113	19.6324	20.5245	24.893		0.619893
	SERP1	136.38	121.747	138.556	161.145		0.619068
	KCNK13	5.23569	5.48196	4.26946	6.02903		0.618272
	ZC3H12A	17.2331	16.5157	16.4033	20.2637		0.61556
	INSIG1	109.892	103.115	87.5521	117.326		0.615343
	SERTAD3	11.6765	12.5169	10.1789	13.9458		0.614469
	CHIC1	7.22221	6.87895	5.5567	7.63862		0.614252
	ZFAND6	56.1695	53.2091	60.1788	69.6105		0.613915
	SELENOT	126.259	120.276	134.388	156.297		0.613739
	ADAMTS1	117.44	137.621	139.103	169.715		0.613302
	DNAJB4	69.4036	74.3807	80.5229	94.8507		0.61232
	BCLAF3	10.7679	9.72952	8.7267	11.2987		0.61219
	LPAR3	22.7714	24.0512	20.1349	27.0415		0.611992
	PNRC1	77.4183	72.9654	79.289	93.0931		0.611431
	GM10033	13.6238	12.8032	10.8216	14.3883		0.60903
	SOX11	38.9432	34.4405	19.1497	32.6305		0.608891
	GM20300	25.0729	24.6713	25.1435	30.2802		0.607854
	ZFP930	14.0172	13.8166	12.6699	16.077		0.606991
	RAD17	18.6235	18.1904	17.8582	21.8676		0.606616
	NADK2	19.474	18.2427	17.5818	21.7181		0.606237
	PPP6C	50.5575	48.7306	51.0397	60.4766		0.606158
	RABGAP1L	94.125	87.6694	78.7405	100.844		0.605998
	NAT2	6.9014	6.67884	5.30763	7.26106		0.605771
	KANTR	8.4581	8.21031	6.55674	8.94226		0.605555
	PLK2	92.7263	105.122	71.9043	107.182		0.60546
	ENSMUSG00000026276.21	25.3194	23.6707	19.7344	26.1997		0.603608
	DRAM2	64.8226	63.0279	62.2975	75.6344		0.603504
	DEK	76.8157	73.164	72.9543	88.0155		0.602357
	MOB4	36.5607	36.5064	37.417	44.5086		0.602091
	SPTSSA	51.433	48.7454	50.1827	59.4754		0.601198
	2610044O15RIK8	13.7058	12.7875	10.8838	14.2004		0.599901
	IER3IP1	28.741	28.57	28.2441	34.0765		0.59979
	SPRY1	116.652	127.064	118.302	147.055		0.599331
	DACT1	22.1895	21.8381	19.6991	24.7814		0.596606
	NUCKS1	78.6368	77.4316	81.4235	94.6665		0.59593
	DNASE1L2	4.61187	6.35261	4.50338	6.46805		0.595805
	KCTD12B	23.6944	21.6223	17.2703	23.1693		0.595724
	BTG3	43.8747	44.0053	41.7699	51.0103		0.594697
	ZFP788	20.7698	19.4117	17.3646	21.8519		0.594183
	ZC2HC1A	34.8513	32.6009	31.5588	38.101		0.593847
	SMIM15	45.9883	45.4997	45.6633	54.0737		0.593154
	ZFP367	21.8667	20.5232	20.203	24.1563		0.593139
	E430024I08RIK	13.9896	13.6877	10.9788	14.6105		0.592322
	RLIM	61.0742	61.5998	57.8942	70.7698		0.592245
	TIPARP	43.2762	43.1538	38.322	48.2253		0.591897
	G0S2	64.3925	63.0218	52.5361	68.3806		0.591743
	1810013L24RIK	59.4545	61.7336	60.6883	72.4053		0.591441
	METTL21A	13.7944	13.4286	12.1513	15.1034		0.590439
	CTSO	67.0705	64.9167	67.7089	78.2401		0.589932
	YOD1	14.7832	15.036	13.6118	16.8995		0.589907
	KLF6	184.232	214.664	178.495	231.868		0.589757
	RBM12B2	24.7265	26.7463	20.9824	28.1312		0.589399
	PLSCR4	68.6462	66.7787	58.3864	73.7698		0.58938
	REL	27.5158	27.9915	19.7445	28.1222		0.589118
	RC3H1	52.5103	49.5475	45.2492	55.7483		0.588083
	SIRT1	26.3251	27.7104	24.8605	30.9077		0.587924
	ZFP395	57.3958	56.547	48.8629	61.9274		0.587491
	PPP2R3C	17.9858	17.7563	16.6342	20.1828		0.586871
	HOXA5	48.9558	44.6296	32.1886	45.0578		0.586551
	ENSMUSG00000120166.1	15.0652	14.0434	12.7696	15.6986		0.585484
	GM47469	13.6184	12.3103	10.5115	13.3595		0.585381
	TRIM23	17.6806	15.4106	13.8127	17.1015		0.585201
	NEMP2	19.0368	16.5754	15.1074	18.5258		0.584726
	FPGT	18.2009	18.0158	16.2036	19.9972		0.584383
	ASB3	11.6645	11.5709	11.2381	13.3234		0.584131
	MYLIP	52.3431	47.7718	42.1656	52.4843		0.583564
	HSF2	14.8001	14.8716	14.6421	17.2096		0.583106
	PCNP	100.554	99.7475	104.343	118.737		0.581784
	D030056L22RIK	18.9961	20.4283	19.7346	23.3325		0.580947
	ZFP874B	15.2562	14.8497	13.1031	16.2378		0.5809
	AMOTL2	290.649	321.505	234.251	322.797		0.580825
	ZFP213	11.6557	11.9975	11.8663	13.8297		0.579527
	C9ORF72	16.7452	16.8882	16.1455	19.1352		0.579262
	PPM1K	23.4361	20.2585	17.3774	21.7999		0.579233
	TMED2	180.566	178.173	192.267	214.525		0.579109
	NECAP1	33.5127	34.2043	35.4484	40.331		0.579029
	TRMT10C	14.6281	15.0305	13.3375	16.413		0.578573
	MBD4	9.14725	8.77287	7.12037	9.18305		0.577796
	RND3	27.9299	25.6652	22.2482	27.6789		0.577687
	IGIP	40.8561	40.7535	39.1907	46.045		0.575965
	AXIN2	48.9447	47.0061	44.1337	52.4904		0.575933
	RBM12B1	17.646	17.682	13.1054	17.7302		0.575892
	GATA6	45.8653	44.234	44.564	51.0791		0.575228
	ZFP658	9.46755	10.3579	8.22987	10.6707		0.574072
	GPM6A	51.9109	48.1682	45.5808	53.7544		0.573387
	ZFP160	21.1962	20.9038	17.0913	21.7855		0.573378
	CCNL1	87.0597	89.3656	90.9532	103.161		0.572105
	CDC42EP3	44.8516	45.0116	44.6148	51.2187		0.57147
	ST3GAL4	54.1011	53.831	49.2238	58.7329		0.569919
	ZFP868	13.317	13.6998	12.6847	15.0246		0.569448
	SEPTIN10	24.3078	23.7085	21.7862	25.8846		0.568958
	CLEC2D	160.563	154.84	147.642	171.823		0.568045
	CCNG2	51.0745	49.5905	44.3788	53.3767		0.568023
	BC005537	245.694	245.278	250.535	281.314		0.567379
	RBM18	42.1856	41.8901	40.6786	46.7607		0.566326
	CLK1	197.959	215.49	175.704	221.45		0.566087
	UBE2B	83.0533	85.3998	81.3663	94.3413		0.56571
	AKAP7	40.8992	39.6846	33.7277	41.5266		0.565663
	RAB2B	20.054	20.9169	20.1427	23.2177		0.565465
	SESN3	45.6878	43.178	42.1683	48.2195		0.564986
	GM46430	21.3326	20.6582	17.6237	21.6013		0.564268
	CDKN1B	88.9901	82.9418	71.9378	87.3558		0.564024
	CD36	1101.2	1079.43	980.447	1161.03		0.56364
	CCNT1	46.272	47.8753	38.8489	48.7291		0.561886
	TPD52	68.5377	66.0565	66.5923	74.4891		0.561551
	FBXO33	23.8856	24.0838	21.4292	25.499		0.560258
	C1GALT1C1	29.7804	30.1362	29.9487	33.6267		0.559653
	BNIP3L	167.879	161.476	146.972	172.314		0.558649
	SLC25A32	24.8676	23.782	21.2846	25.1286		0.557588
	SNX18	70.4394	73.8098	72.1451	81.3098		0.557088
	H2AC25	22.4008	23.7907	21.5835	25.2002		0.555387
	SPTY2D1	36.5338	38.7801	28.3469	37.2696		0.55521
	GTF3C3	19.282	18.9828	16.3814	19.6247		0.55493
	AKAP17B	7.351	6.34546	4.38311	5.94897		0.554498
	DNAJB14	37.329	33.4161	29.345	34.7858		0.554258
	RIPK2	15.4633	15.5637	13.1444	15.9071		0.5541
	ATF2	49.9733	48.9996	46.1321	52.6725		0.553679
	CD47	214.487	209.413	196.857	224.808		0.553345
	MRPL50	23.0282	24.3359	22.4234	25.8697		0.553253
	LZTFL1	25.8759	26.4307	24.3767	28.1029		0.553126
	RAMAC	43.9196	43.6062	44.1099	48.509		0.553023
	ZCCHC4	15.0393	14.5925	13.145	15.3308		0.552708
	SLC38A6	20.9611	20.9106	17.659	21.3084		0.552467
	NMT2	37.7761	37.3748	35.0983	40.0007		0.551939
	ZFP68	53.6021	54.3413	48.6721	56.8376		0.55175
	SYPL	152.591	149.516	148.527	164.092		0.550564
	NFKBIZ	38.8186	28.0604	22.0537	27.5851		0.550447
	SLC35G2	17.1592	18.1527	14.796	18.1002		0.549345
	MAP9	9.8745	9.75974	7.2222	9.30923		0.548184
	EHF	47.067	47.5426	35.935	45.7497		0.548047
	MICU2	48.0604	47.4843	45.4001	50.8862		0.547844
	EIF4A2	429.698	428.488	407.656	456.737		0.546243
	LAPTM4A	479.265	478.589	482.07	524.062		0.545524
	GM43737	11.1198	13.3149	11.1552	13.342		0.54524
	FGF7	26.4997	26.5824	22.4929	26.7536		0.545154
	GINM1	64.4062	63.5697	57.1068	65.7408		0.544769
	ZFP655	37.1617	38.359	34.4833	39.6691		0.544589
	KCNS3	26.0796	24.9765	20.6935	24.8495		0.54411
	ZFP59	9.61983	10.2237	7.59053	9.67986		0.543379
	FEM1C	47.5343	47.2652	40.0727	47.3759		0.542444
	GM16091	2.59699	3.64197	1.40632	2.7318		0.541134
	TNFRSF19	86.0429	88.5986	68.5387	84.8879		0.540215
	GPR157	15.5043	14.1012	10.4443	13.2518		0.539886
	CDON	28.034	29.0776	23.5689	28.4007		0.53946
	PRKAA2	23.4435	22.7849	17.5575	21.7146		0.538257
	MYCT1	87.6915	91.7007	72.733	88.507		0.538253
	LACTB2	42.7217	41.0998	37.023	42.049		0.538243
	GDNF	12.8364	15.8793	9.69851	13.7471		0.53746
	LRIG3	18.5455	19.3352	12.4761	17.0971		0.537454
	YPEL2	31.6579	31.4639	21.9413	28.6983		0.537369
	NQO2	41.6751	39.6179	35.4118	40.2625		0.536621
	GGPS1	48.7356	49.6541	43.8788	50.0679		0.535298
	CREBRF	77.7498	74.8189	62.2949	73.2739		0.534402
	RSRC2	74.0328	76.4537	65.1398	75.5156		0.533327
	PRR5L	43.6581	45.5829	32.1887	41.4441		0.532896
	SFXN2	34.618	32.0439	26.7894	31.3397		0.532686
	B130024G19RIK	18.4296	17.4953	10.5827	14.9468		0.532331
	TRIM2	35.5393	34.2984	25.2377	31.6646		0.531855
	ANGPT2	45.6558	45.0046	36.476	43.3015		0.531433
	VARS	68.3058	66.0083	99.6894	87.9151		0.530575
	SELENOP	1073.21	1053.63	941.59	1056.16		0.529348
	GPATCH11	20.9878	21.6385	17.5679	20.7515		0.529288
	SAMD8	28.4781	29.0099	24.2788	28.1415		0.528097
	UBE4A	62.6136	61.3212	52.9691	60.3365		0.527923
	2610008E11RIK	36.6916	35.4875	27.5893	33.295		0.527848
	SP1	119.634	114.147	102.699	114.454		0.527813
	RASL11B	22.6354	21.6087	35.5354	30.0431		0.525743
	APH1C	16.9878	17.4835	12.8849	15.925		0.524392
	GPBP1L1	72.2695	73.2964	66.7206	73.1702		0.52258
	KAT2B	77.8585	78.1179	66.0449	75.2812		0.522196
	PLSCR1	68.5421	68.6121	55.2331	64.547		0.521191
	RUNX1T1	9.96503	9.39731	5.94348	7.97085		0.519585
	KRCC1	57.8711	58.2556	51.0098	56.7656		0.519521
	CSK	82.8696	80.0278	112.749	99.7596		0.517488
	MSL3L2	19.709	19.0216	15.0866	17.6331		0.516974
	GM36660	2.70562	3.1238	1.72182	2.50364		0.51668
	GM33989	55.1467	54.8711	40.9268	49.4586		0.516281
	STAG1	50.8424	48.7915	39.8141	45.6941		0.515702
	FOXP1	150.758	147.585	102.846	128.926		0.514817
	PTGER4	7.73946	6.45771	11.7271	9.35325		0.514345
	AHR	116.292	108.262	63.5974	88.278		0.513664
	IER3	167.324	163.366	106.984	138.397		0.511918
	WDR1	167.531	172.716	226.06	203.608		0.510582
	INSR	84.8348	83.7207	67.3211	77.111		0.510528
	DPY19L4	33.3882	32.3576	23.7515	28.5909		0.509558
	PELP1	27.7741	27.0858	36.6951	32.48		0.509243
	SF1	207.763	208.866	267.075	242.266		0.509025
	SYVN1	66.1682	66.5756	91.2338	80.127		0.507745
	RARA	63.0673	61.5314	88.5922	76.182		0.507462
	CWF19L2	21.1445	20.8049	14.6012	17.9146		0.505975
	MARF1	98.9675	102.434	83.9944	94.2492		0.505552
	RNF144B	56.0972	54.9244	39.519	47.6048		0.504056
	NR3C1	171.48	163.441	128.297	146.695		0.502831
	FOXP4	74.489	79.2098	107.096	93.664		0.502743
	AHDC1	41.7668	41.2583	61.4672	51.4025		0.500387
	SCAF1	111.363	113.856	153.696	133.836		0.500226
	ACTN1	165.558	153.756	195.279	174.545		0.500078
	ADRA1A	27.6674	25.0442	14.5152	19.7644		0.499612
	GLP1R	295.151	282.649	185.99	233.903		0.499111
	DBNL	92.7047	90.9026	113.357	101.908		0.498915
	DDX54	55.6602	55.6177	72.0967	63.7132		0.498873
	FBXO32	34.0742	35.107	19.4721	27.1695		0.497801
	DIP2C	46.2139	44.7721	34.9135	39.5973		0.49692
	DIXDC1	44.9503	46.5571	25.8155	35.9595		0.496867
	SLC16A9	180.965	177.411	125.004	150.052		0.496178
	PTCH1	124.312	120.623	82.2821	100.395		0.494788
	PITPNM1	65.9962	63.1672	77.4704	69.5602		0.494606
	PHC2	115.278	119.129	155.241	135.699		0.494585
	STK4	183.021	181.921	114.654	146.617		0.494368
	CSNK1D	159.621	163.047	196.352	176.889		0.49218
	SPRYD3	46.9081	48.172	61.2451	53.8318		0.491987
	NPLOC4	67.1878	67.7205	79.4181	72.3532		0.491735
	NACC1	101.149	99.288	129.864	112.551		0.491162
	POLRMT	22.4235	22.3382	30.7128	26.0065		0.490217
	OSR1	12.2266	10.4508	17.4716	13.6822		0.490009
	WIZ	75.061	77.0142	92.0758	82.654		0.488817
	INTS15	20.4221	20.9413	30.6558	25.2126		0.488645
	SAMD5	29.3589	27.1873	17.2261	21.6976		0.488539
	UPF1	83.8498	87.131	106.795	94.7089		0.488377
	MAP3K1	51.2883	47.01	32.8932	39.0217		0.488362
	DENN2B	183.718	191.355	140.411	161.911		0.488027
	CCL5	16.7822	18.5744	37.8221	27.5166		0.487913
	SF3A1	61.0873	61.6136	75.0198	66.6243		0.487613
	PIK3R5	22.1415	20.2515	37.7974	28.3011		0.487538
	CRTC2	67.2785	66.6904	83.288	73.1019		0.487416
	PRKD2	84.4386	85.3946	111.358	95.8744		0.487284
	UBE2G2	50.7561	53.5326	70.3337	60.3175		0.486957
	SAMD4B	87.6292	90.6743	113.617	99.2638		0.485892
	ABCF1	78.2872	79.7752	94.9366	84.7298		0.484969
	DNAJA3	43.446	42.903	52.1668	46.025		0.484118
	S1PR1	305.796	337.079	465.551	388.49		0.484022
	KLC2	30.1801	30.6014	38.2917	33.3025		0.483394
	CTDP1	29.2484	29.643	36.5106	31.9583		0.483092
	DLST	118.286	121.272	139.696	126.054		0.483025
	SERTAD2	91.8092	90.7762	61.8524	73.7158		0.482975
	BYSL	17.9769	18.4812	27.8211	22.3137		0.481914
	DAPK3	26.0377	26.7772	34.2985	29.4203		0.481703
	ARHGAP23	105.308	109.898	133.819	117.105		0.480498
	RIN3	96.8006	93.259	139.11	111.578		0.480175
	CXXC1	70.9197	72.7657	87.5691	76.8853		0.47953
	CYTH1	51.5996	50.6458	65.8482	55.8158		0.47913
	CISH	62.1706	61.3056	78.0966	66.7864		0.479091
	CORO1C	162.327	159.357	188.365	166.58		0.479061
	CHERP	70.5126	72.7974	92.9642	79.3921		0.478954
	DLGAP4	116.121	119.814	141.038	124.837		0.478576
	ARFGAP2	77.1792	77.9508	88.0029	79.3232		0.477984
	ATP1A1	519.788	531.401	601.468	541.341		0.47785
	CASKIN2	189.579	189.373	273.697	221.124		0.477517
	WDR18	32.0455	31.9814	37.8175	33.305		0.477156
	MARK4	46.9889	49.3834	64.5107	54.3398		0.477108
	LRRC47	43.9134	45.1779	60.8127	50.5425		0.476858
	UBA1	241.574	243.666	268.267	243.969		0.476565
	LFNG	51.064	46.3027	73.8235	57.2025		0.476187
	KLHL25	29.6323	30.7503	38.5592	33		0.476125
	SLC35E4	24.294	25.7662	33.9996	28.4534		0.476082
	ZC3H3	20.7471	21.2164	29.7982	24.2749		0.475841
	NUDCD3	95.5985	93.6331	100.826	92.4332		0.475334
	CAMTA2	78.9624	79.641	92.0323	81.5878		0.475251
	PHF12	82.7665	84.1844	90.3313	82.9355		0.475232
	PTPRB	900.25	860.538	591.007	688.836		0.474554
	ILRUN	221.503	226.389	250.086	226.055		0.474431
	AEN	28.4996	29.2366	39.2218	32.4216		0.473596
	NELFA	27.2457	27.7161	35.5474	29.9205		0.472951
	CYB561	118.057	123.54	137.812	123.488		0.472496
	PPP6R1	151.696	153.57	171.462	153.557		0.472436
	GATAD2A	102.024	102.08	124.405	106.941		0.472177
	ACTN4	412.878	416.138	460.481	413.806		0.472047
	PFKFB4	54.7374	56.3816	67.4867	58.4401		0.471792
	CARM1	53.8341	54.7728	67.0419	57.4709		0.47179
	PTPN23	74.675	74.6551	90.7599	78.0241		0.471687
	CAPN15	50.8943	53.3888	63.8888	55.3103		0.471619
	LSM4	20.4514	20.5759	25.8741	21.89		0.471258
	BOP1	27.8518	28.1632	40.8033	32.3848		0.469574
	UBAP2	63.1726	64.8012	74.7519	65.5144		0.469458
	NSUN5	17.6095	17.2548	21.3501	18.1219		0.469419
	SCRIB	65.1123	66.3293	75.0677	66.2747		0.468714
	AXIN1	57.4206	59.1762	69.542	60.2944		0.468422
	ZFP746	43.0876	44.6118	53.6795	45.9843		0.467837
	USP10	47.2211	47.334	57.8097	49.1494		0.46745
	PXK	71.2099	68.651	75.2868	67.0234		0.465642
	SUPT5	141.105	141.416	156.115	138.485		0.465446
	RASSF2	55.2141	57.8616	71.6112	60.1962		0.464933
	MYC	7.65734	7.54958	13.8516	9.94444		0.464669
	ABTB2	10.2539	10.9607	16.0302	12.525		0.464047
	ARL4D	45.8738	43.5075	70.1858	52.5915		0.462573
	EIF4ENIF1	64.0919	65.4822	73.7673	64.3681		0.46225
	GPAT4	69.1958	71.9302	77.3363	68.8904		0.461526
	HERPUD1	134.586	141.821	192.101	153.933		0.460984
	CPSF1	81.7202	80.4169	86.2801	76.7712		0.460543
	CLK2	66.7833	67.4579	70.7562	63.6495		0.460514
	TBC1D10A	34.6379	37.8112	48.559	39.7661		0.460414
	LIMS2	101.152	106.684	138.553	112.856		0.460193
	FKBP5	13.7539	13.0914	36.1191	22.641		0.460084
	WDR4	20.4575	21.4138	26.4921	21.9866		0.458953
	CNKSR3	18.2992	18.2784	25.3672	20.0251		0.458812
	AP3D1	151.597	151.898	152.164	139.447		0.458614
	NRP2	122.046	123.913	84.5796	95.5346		0.458217
	IPO13	51.4962	55.6097	62.2652	53.9241		0.457469
	PRX	321.429	337.532	383.884	329.716		0.45704
	GAK	130.668	131.353	131.314	119.913		0.456521
	BRD4	118.797	120.986	125.958	112.585		0.455916
	SAFB	113.436	118.7	126.345	111.624		0.455523
	CDC42EP4	137.868	151.37	204.83	162.169		0.455277
	UBAP2L	170.05	172.467	174.37	157.727		0.454757
	SGSM3	30.5228	32.5097	41.6614	33.7275		0.454726
	LIMK1	24.9266	25.2457	36.4527	28.0439		0.454532
	NUP98	69.2838	70.3401	75.9989	66.4536		0.454107
	SMG5	75.7967	76.5048	79.7926	70.9734		0.454092
	RNF216	67.5198	66.6045	67.3671	60.7931		0.453776
	DCTN1	180.529	185.744	188.406	169.721		0.453617
	EFNB1	135.144	147.273	196.563	155.764		0.453017
	DDX27	30.1995	30.4329	34.8937	29.5715		0.452672
	NOL10	12.6989	12.219	15.917	12.7363		0.452669
	EP400	102.594	100.132	102.436	91.6151		0.452268
	MYBBP1A	88.6206	87.4116	93.0964	81.5088		0.451552
	SEC14L1	241.191	253.403	269.706	236.192		0.451516
	SLC35G1	4.57371	5.17809	7.96612	5.92833		0.451022
	RNF40	84.3534	87.1198	87.0735	78.4928		0.450608
	PPAN	20.4322	20.5621	25.8094	20.8855		0.450396
	SORBS3	205.179	217.878	283.866	225.474		0.449381
	MRPL53	17.1901	18.2715	19.6601	17.0056		0.448321
	NOVA2	33.9548	34.4369	49.1698	37.4253		0.447636
	TNFRSF21	32.7421	31.8315	42.9052	33.4499		0.44757
	DTX2	18.576	20.4917	26.3385	20.9266		0.446861
	POLR3E	23.8295	22.6901	26.8864	22.1501		0.446787
	SEMA6B	11.6854	11.2705	17.3069	12.764		0.446648
	GEMIN5	20.897	20.3297	21.5221	18.6891		0.446553
	CREBBP	68.4947	66.8757	67.5912	59.7917		0.444657
	B4GALT4	49.6694	54.3714	58.9591	50.3425		0.444209
	HIRA	41.4295	43.0136	45.2146	39.1733		0.443999
	ARFGAP1	54.1801	52.9105	54.7574	47.7378		0.44338
	INTS3	59.7132	62.3407	68.1512	57.832		0.443185
	RGS2	100.182	69.7106	92.2162	71.7051		0.442824
	GPS2	36.1605	36.0294	39.3889	33.3325		0.441968
	ZC3H18	71.9759	72.0342	72.7458	63.8796		0.441219
	POLG	93.0581	97.1217	90.4997	82.5131		0.439785
	CDKN1A	58.4897	69.0186	134.361	89.4322		0.439731
	FEM1A	63.7768	67.3171	67.3882	59.1088		0.438801
	PPP1R13B	96.7646	99.8845	104.927	89.8334		0.438615
	JDP2	27.6211	30.1806	40.1642	30.8301		0.438271
	SEMA7A	73.8055	75.0626	125.865	87.9926		0.437931
	DOLK	18.8702	19.0764	20.1729	17.1583		0.437163
	E4F1	31.18	32.273	39.3607	31.3127		0.437123
	RAPGEF1	134.117	133.36	128.666	114.318		0.436286
	FAM167A	26.7013	27.9507	36.3496	28.0505		0.436242
	ADAMTSL2	62.32	73.4513	136.06	91.3561		0.436044
	ZFP335	38.6033	38.1696	45.028	36.2654		0.435895
	NUP188	38.056	38.0234	37.366	32.8325		0.435506
	ZFP319	68.1982	71.2168	70.888	61.82		0.435031
	CHST8	4.57313	4.30581	8.1712	5.41939		0.43435
	TRARG1	17.5234	17.6401	23.9396	18.0251		0.433508
	RNF31	48.6923	48.3309	51.1237	43.0595		0.432956
	RAPGEF3	72.3515	71.4612	88.4363	69.0405		0.43178
	PRR15L	57.721	67.9928	82.1669	64.827		0.43172
	BAIAP2	64.0971	64.3921	66.7938	56.6142		0.431557
	SH2D3C	99.6699	106.582	145.737	108.868		0.431472
	TPCN2	21.7556	23.3522	27.917	22.0328		0.429748
	ERCC5	41.2992	43.5861	41.4072	36.481		0.429222
	LNX2	46.8249	48.8005	61.9787	47.5037		0.428814
	CTTNBP2NL	158.858	168.987	191.701	154.66		0.428792
	KSR1	36.1143	34.3962	43.9549	33.5717		0.428477
	HEATR6	30.7633	29.6435	29.2377	25.2217		0.428349
	KLF13	177.13	184.758	248.476	185.474		0.428114
	ACKR2	56.0948	57.598	62.8864	51.5636		0.427969
	D11WSU47E	11.1817	11.0606	12.5302	10.069		0.42682
	PHRF1	83.0566	84.0126	82.1373	70.811		0.426187
	TRAPPC10	76.5637	75.4762	69.6697	61.8486		0.426114
	MBD1	89.0282	100.446	110.751	89.6687		0.424574
	GLUL	287.008	309.107	375.208	290.422		0.424398
	SGMS1	97.6738	97.229	109.218	87.5835		0.424242
	ANAPC13	25.8486	27.5531	25.7435	22.5978		0.424
	ACIN1	220.364	224.965	198.852	179.299		0.423059
	ZFP592	87.5271	89.5213	81.723	72.2835		0.422107
	KLF10	46.4503	40.5095	65.6697	44.8169		0.422087
	SYK	82.4667	74.4291	80.6156	65.3929		0.421768
	RGCC	42.543	50.6733	63.8261	48.2466		0.42137
	PTGER2	8.87645	8.45301	11.0574	8.208		0.420697
	KDM5C	109.665	121.733	106.988	96.1953		0.420579
	HES1	61.6941	59.9646	66.5254	53.1427		0.420134
	MPP3	5.08653	4.61086	7.18051	4.93772		0.418757
	PPRC1	34.3585	36.4966	51.5748	36.81		0.417956
	DYNC1H1	361.808	364.423	315.128	283.389		0.417024
	TLN1	605.392	609.878	512.816	466.589		0.415597
	ADARB1	105.006	103.113	94.1933	81.8889		0.415033
	MYO19	8.32448	8.80075	9.28273	7.5028		0.414898
	GATA2	150.763	165.102	233.967	165.246		0.414078
	EPRS	89.9998	88.6821	77.5372	68.7604		0.413673
	GRAMD2	195.819	218.563	227.068	183.716		0.41226
	GM9902	1.19352	1.16292	2.02095	1.3101		0.411479
	NHLRC1	5.83158	5.40971	7.82784	5.4303		0.410219
	USP54	79.8838	80.1947	69.5266	61.1256		0.408262
	BCAR3	55.1685	56.9634	63.8105	48.8811		0.404732
	DUSP16	66.2574	68.9056	71.2841	56.3591		0.402021
	KIRREL	51.2467	52.9151	50.9723	41.7648		0.40202
	ADAMTS15	87.2031	84.1715	80.4394	65.8967		0.400318
	PTPN21	62.3074	62.4705	53.3141	46.2702		0.399623
	MYH9	917.757	910.198	805.405	682.798		0.397993
	BANP	20.8802	22.072	30.8275	20.9978		0.396937
	HEY1	63.9663	71.795	93.1262	65.3479		0.396237
	MIR142HG	14.0899	13.4597	17.4736	12.2322		0.395436
	AMMECR1L	45.7586	46.8893	40.866	34.6183		0.394487
	KLF15	33.7506	38.7478	67.546	41.8669		0.393879
	PFKFB3	114.053	126.398	124.159	98.6799		0.393842
	SLX4	24.2941	24.4904	22.7029	18.5719		0.393528
	MYH14	491.583	527.38	425.449	371.961		0.390375
	ENSMUSG00000120878.1	1.39691	1.26615	3.73592	1.95144		0.390127
	BCL2L1	109.545	123.388	175.159	116.439		0.390019
	SNRK	217.821	233.448	218.606	175.029		0.387186
	JADE2	89.1988	91.9317	89.8149	70.2175		0.386348
	EVA1C	10.4151	11.3474	15.2834	10.2885		0.386339
	A130014A01RIK	9.15005	9.74047	9.04357	7.23857		0.385357
	KLF7	125.965	128.22	116.804	94.3448		0.385044
	RBMS2	64.017	65.9477	51.2625	44.8651		0.382774
	WDR81	56.2539	57.6549	49.0977	40.4018		0.378462
	GM20390	20.0469	22.7254	23.2212	17.3807		0.378279
	HCAR2	6.70906	8.72672	9.42925	6.85062		0.37732
	DGKQ	33.7997	33.7794	28.2327	23.3404		0.376385
	ADAP2	13.9137	14.1295	17.1741	11.7287		0.374675
	MED12	99.5162	99.5717	73.2217	64.5554		0.373599
	KLF9	154.753	171.203	216.039	144.523		0.373211
	AP5B1	9.47155	8.9182	8.65974	6.54935		0.37259
	LPIN2	205.666	213.837	190.958	149.789		0.370036
	METTL21E	0.788817	0.919756	2.63332	1.27892		0.359948
	GM8181	4.15832	4.40357	4.22579	3.10088		0.359341
	ANKRD11	213.334	210.547	142.046	126.274		0.358131
	PRF1	8.22088	9.25274	11.7956	7.48604		0.35566
	ATP7B	65.6878	68.8408	58.1899	44.9078		0.353519
	FOXO3	108.072	108.926	119.747	80.5245		0.352139
	PER2	25.4304	26.8212	38.1486	22.4622		0.345733
	FAM107A	12.2185	13.9081	26.2573	13.8538		0.344918
	GM41381	2.92819	2.95073	3.28137	2.04372		0.327935
	TENT5B	11.4578	14.0786	22.5791	12.0065		0.327531
	GM9387	0.981069	1.04763	1.25584	0.747529		0.324524
	GM9910	8.02458	9.11488	9.71529	6.07122		0.32242
	MAP3K6	22.8051	26.1567	43.9121	22.029		0.314391
	ENSMUSG00000121050.1	1.68121	1.55243	1.78516	1.02373		0.306728
	CCL3	0.929319	1.45271	2.26518	1.07951		0.290357
	ANGPTL4	49.9421	63.93	66.2145	32.21		0.247494
	TNF	1.70683	4.3246	6.52033	2.66413		0.245657
